# Supplementary material for: Establishing ultraporous permanently polarized hydroxyapatite as a green and highly efficient catalyst for carbon dioxide conversion in continuous flow under mild conditions
Source: Royal Society of Chemistry journal article supplement (doi:10.1039/d4su00305e), 2024-01-01
Supplement: d4su00305e1.pdf [file d4su00305e1.pdf]

## SUPPORTING INFORMATION

# Establishing Ultraporos Permanentl Polarized Hydroxyapatite as Green and Highly Efficient Catalyst for Carbon Dioxide Conversion in Continuous-Flow under Mild Conditions

*Marc Arnau,<sup>1,2</sup> Jordi Sans,<sup>1,2,\*</sup> Pau Turon<sup>3,\*</sup> and Carlos Alemán<sup>1,2,4,\*</sup>*

<sup>1</sup> *Departament d'Enginyeria Química, EEBE, Universitat Politècnica de Catalunya, C/ Eduard Maristany, 10-14, Ed. I2, 08019, Barcelona, Spain*

<sup>2</sup> *Barcelona Research Center in Multiscale Science and Engineering, Universitat Politècnica de Catalunya, C/ Eduard Maristany, 10-14, 08019, Barcelona, Spain*

<sup>3</sup> *B. Braun Surgical, S.A.U. Carretera de Terrassa 121, 08191 Rubí (Barcelona), Spain*

<sup>4</sup> *Institute for Bioengineering of Catalonia (IBEC), The Barcelona Institute of Science and Technology, Baldiri Reixac 10-12, 08028 Barcelona Spain*

\* Correspondence to: [jordi.sans.mila@upc.edu](mailto:jordi.sans.mila@upc.edu), [pau.turon@bbraun.com](mailto:pau.turon@bbraun.com) and

[carlos.aleman@upc.edu](mailto:carlos.aleman@upc.edu)

## **METHODS**

### **Synthesis of Hydroxyapatite (HAp)**

15 mL of 0.5 M  $(\text{NH}_4)_2\text{HPO}_4$  in de-ionized water were added at a rate of 2 mL/min to 25 mL of a 0.5 M of  $\text{Ca}(\text{NO}_3)_2$  solution in ethanol with pH previously adjusted to 11 using ammonium hydroxide solution. The mixture was left aging for 1 h under gentle agitation (150 rpm) at room temperature. Hydrothermal treatment at 150 °C was applied using an autoclave Digestec DAB–2 for 24 h. The autoclave was allowed to cool down before opening. The precipitates were separated by centrifugation and washed with water and a 60/40 v/v mixture of ethanol/water (twice). After lyophilizing it for 3 days, a white powder was obtained. The HAp powder was extensively grinded to reduce aggregates and homogenize the grain size, this step being crucial for the nanostructure of the HAp scaffold (see below).

### **Synthesis of Pluronic® F-127 hydrogel**

25 g of distilled water was mixed with 25 g of Pluronic® F-127 polymer using a FlackTek SpeedMixer at 3500 rpm for 5 minutes. After that, 50 g of Pluronic® polymer were added and vigorously stirred using the same conditions. The resultant hydrogel was stored at 4 °C.

### **Preparation of ultraporous HAp scaffolds**

HAp powder was extensively grinded to reduce aggregates and homogenize the grain size, this step being crucial for the nanostructure of the HAp scaffold. Then, 60% wt. of previously prepared Pluronic® F-127 hydrogel was slowly added to the grinded HAp powder in a cold room at 4 °C. In order to achieve a homogeneous mixture, such addition process was periodically interrupted for stirring at 2500 rpm for a 2 min minutes using a

Fisherbrand™ Digital Vortex Mixer. The obtained white paste was left aging at 4 °C for 24 h to ensure the homogeneous distribution of the hydrogel. The resulting ink was modeled using a cold spatula (< 4 °C) to obtain 3D HAp scaffolds with the desired shape. The utilization of the cold spatula allowed to reduce the friction between the metal and the paste without compromising the homogeneity of the shaped samples. Finally, the scaffolds were calcined at 1000 °C using a muffle Carbolite ELF11/6B/301 for 2 h. In this step, the Pluronic® F-127 hydrogel was completely removed from the modeled scaffold.

### **Thermal polarization for the catalytic activation of ultraporous HAp**

Calcined HAp scaffolds were catalytically activated by placing the samples between two stainless steel plates (AISI 304), which acted as electrodes. The HAp sample was left in control with negative electrode, while the positive electrode was separated 4 cm from the calcined scaffold. A constant DC voltage of 500 V was applied for 1 h with a GAMMA power supply, while the temperature was kept at 1000 °C. Samples were allowed to cool down maintaining the applied electric potential for 30 minutes, and finally, all the system was powered off and left to cool down overnight.

## **RESULTS AND DISCUSSION**

### **Further analysis of the batch reactions at 4 hours**

It is worth noting that a change in the tendency of both individual and total yields is observed after 4 h of reaction, which has been attributed to the equilibrium thermodynamics among the different phases when the liquid water evaporates and reacts. In any case, the yields of products in the gas phase only represent around 30%

and 0.5% with respect to the yields of products adsorbed on the catalyst and dissolved in the supernatant, respectively.

### **Long term continuous reaction**

All these features can be clearly observed when merging both approaches (i.e. wet-CO<sub>2</sub> and addition of 1 mL of liquid water in the reactor) in a single long term (4 hours) continuous reaction. Figure 3d shows the variation of the non-accumulated yields for formic acid, acetic acid and their sum (total) against the reaction time for the continuous process conducted at 95 °C. As it can be seen, the yields of formic acid and acetic acid were very low for reaction times lower than 15 min. Then, at 15 min, the yields drastically increased, reaching the maximum value (1.97 and 0.10 mmol/gc•min for formic acid and acetic acid, respectively). This rapid increase was due to the evaporation of liquid water and, therefore, the accessibility of water molecules as a source of protons and hydroxyl groups. After 15 min, all the yields dropped rapidly because the only water entering into the reactor was that supplied through wet-CO<sub>2</sub>. Finally, as reaction time increased, the yield of formic acid and acetic acid, and their sum as well, grew slowly but steadily. Additional assays showed similar results at 120 °C, even though in such case the sharp increment in the yield occurred at reaction times lower than 15 min due to the faster evaporation of liquid water (not shown).

### **Analysis of the products adsorbed in the catalyst**

After such assays, all catalyst samples were dissolved in deuterated water containing 100 mM of HCl and 50 mM of NaCl to determine the amount of adsorbed products on the catalyst by <sup>1</sup>H NMR. Results, which are represented in Figure 3f, allowed the detection several reaction products. Thus, formic acid, which was the predominant ( $0.27 \pm 0.02$  mmol/gc), was accompanied by small quantities of C<sub>2</sub> and C<sub>3</sub> products (i.e. acetic acid, ethanol and acetone with  $\approx 0.02$  mmol/gc each). Accordingly, for a continuous-flow reaction, the products adsorbed on the catalyst (Figure 3f) only

represented  $\square 0.01\%$  of the total yield, what should be considered as residual. Furthermore, this value was significantly lower (two orders of magnitude) than those obtained in the batch reaction in Figure 2, where the amount of product adsorbed on the catalyst was around 1.6 % after 18 h.

### **Mathematical tools used for the kinetic analysis**

Model Selection Criterion (MSC):

$$MSC = \ln \left( \frac{SST}{SSE} \right) - \frac{2p}{n} \quad (S1)$$

where "p" , "n" , and "SST" are the number of fitting parameters used, the number of experimental points, and the squared sum of the total error, respectively.

Arrhenius relation:

$$k_3(T) = k_0 e^{-\frac{E_a}{RT}} \quad (S2)$$

where  $k_0$ , R and T are the frequency factor, the gas constant and the temperature (in K), respectively.

**Table S1.** Detailed information of the experimental studies compared in Table 1.<sup>79</sup>

| Catalysis     | Reductant      | Catalyst                                          | Selectivity (%)                  | Conversion (%) | Temperature (°C) | Pressure (bar) |
|---------------|----------------|---------------------------------------------------|----------------------------------|----------------|------------------|----------------|
|               |                | Cu-                                               | ~35                              |                |                  |                |
| Heterogeneous | H <sub>2</sub> | ZnO/Al <sub>2</sub> O <sub>3</sub>                | towards<br>CH <sub>3</sub> OH    | 80             | 250              | 30             |
|               |                |                                                   | ~35                              |                |                  |                |
| Heterogeneous | H <sub>2</sub> | Cu-ZnO/ZrO <sub>2</sub>                           | towards<br>CH <sub>3</sub> OH    | 22             | 280              | 50             |
|               |                |                                                   | ~35                              |                |                  |                |
| Heterogeneous | H <sub>2</sub> | Pd/ZnO                                            | 60 towards<br>CH <sub>3</sub> OH | 11             | 250              | 20             |
|               |                |                                                   | ~35                              |                |                  |                |
| Heterogeneous | H <sub>2</sub> | Pd/Ga <sub>2</sub> O <sub>3</sub>                 | 52 towards<br>CH <sub>3</sub> OH | 20             | 125              | -              |
|               |                |                                                   | ~47                              |                |                  |                |
| Heterogeneous | H <sub>2</sub> | Pd <sub>2</sub> Ga/Ga <sub>2</sub> O <sub>3</sub> | towards<br>CH <sub>3</sub> OH    | 30             | 250              | 30             |
|               |                |                                                   | ~70                              |                |                  |                |
| Heterogeneous | H <sub>2</sub> | Cubic In <sub>2</sub> O <sub>3</sub>              | towards<br>CH <sub>3</sub> OH    | ~15            | 300              | 50             |

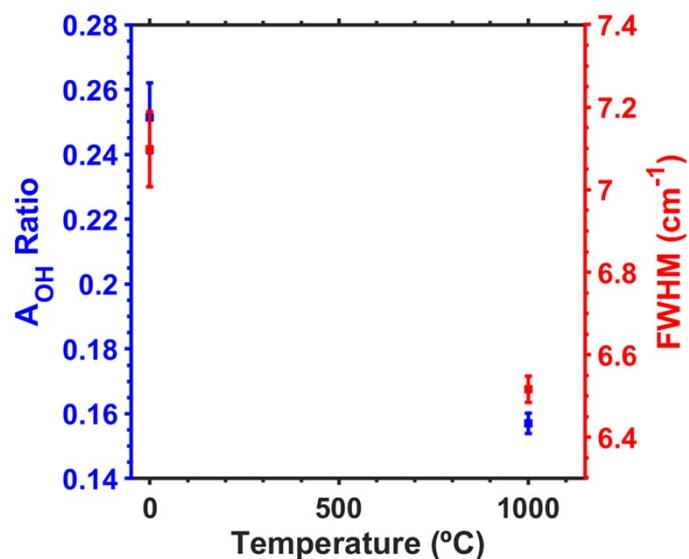

**Figure S1.** Evolution of the OH<sup>-</sup> vacancy generation and presence of defects depending on the temperature of the calcination process. The quantity of OH<sup>-</sup> groups have been obtained by normalizing the area of the Raman peak corresponding to the O-H vibration ( $\nu_5$ ) with the main P-O vibration mode  $\nu_1$  (see Figure 1). On the other hand, the presence of defects in the OH<sup>-</sup> columns is obtained by measuring the full width at half maximum (FWHM) of  $\nu_5$ .

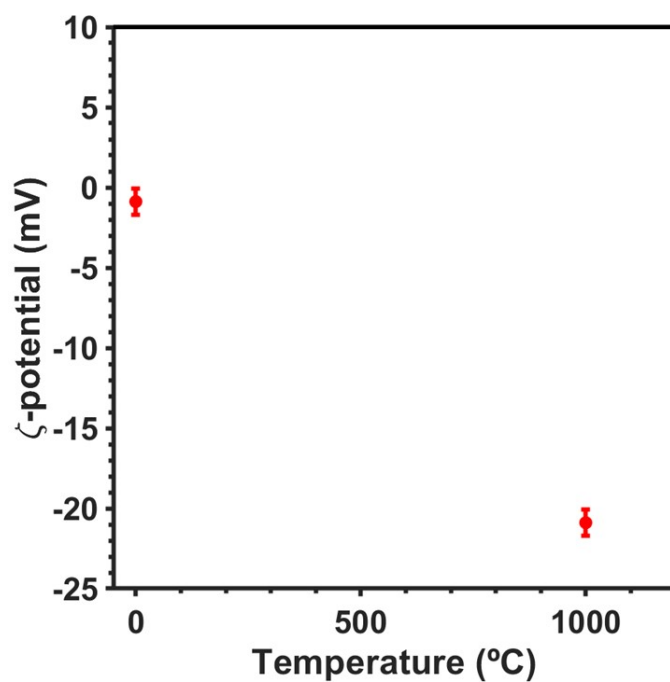

**Figure S2.** Zeta ( $\zeta$ )-potential measurements depending on the temperature of the calcination process. The change observed in the superficial charge accumulation is related with the generation of  $\text{OH}^-$  vacancies reported in Figure S1. The measurements were performed at  $\text{pH} = 7$  and in a NanoBrook 90Plus Zeta equipped with an AQ-1321 cell.



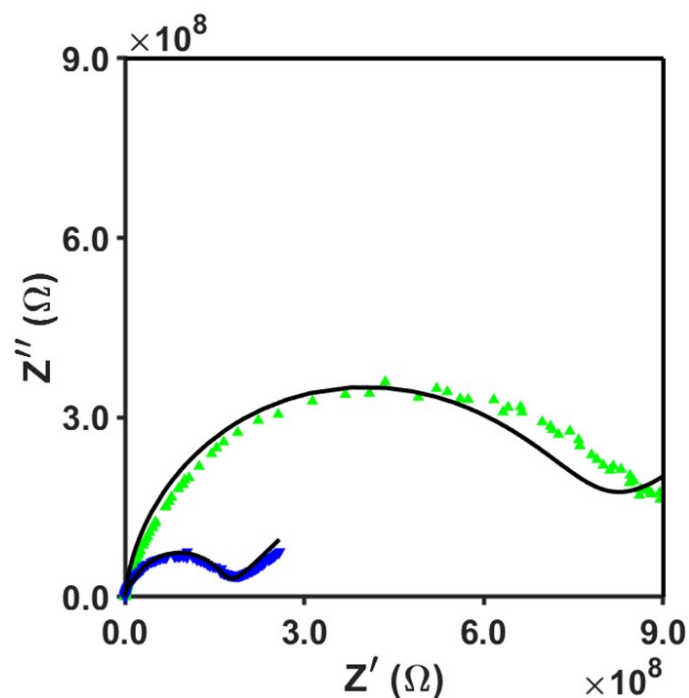

**Figure S3.** Nyquist plot comparing a calcinated HAp sample (green) and a HAp sample after the TSP treatment (blue). Such results have been obtained by means of the electrochemical impedance spectroscopy (EIS) technique using a VIONIC Autolab from Metrohm. Measurements were performed in a dry cell. As expected, a semi-circle (corresponding to a coupled conductive and capacitive behavior) is obtained which can be easily fitted using the Randles circuit approach. Moreover, the change in semi-circle radius denotes a clear enhancement in the electrical conductivity.

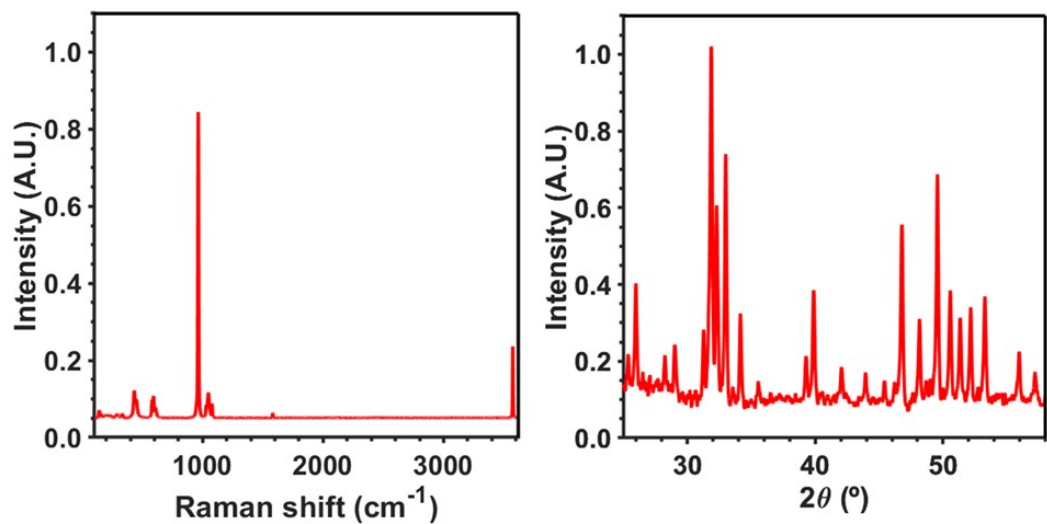

**Figure S4.**

Raman spectrum (left) and XRD diffractogram (right) of calcined HAp samples, before applying the TSP process to transform into upp-HAp.

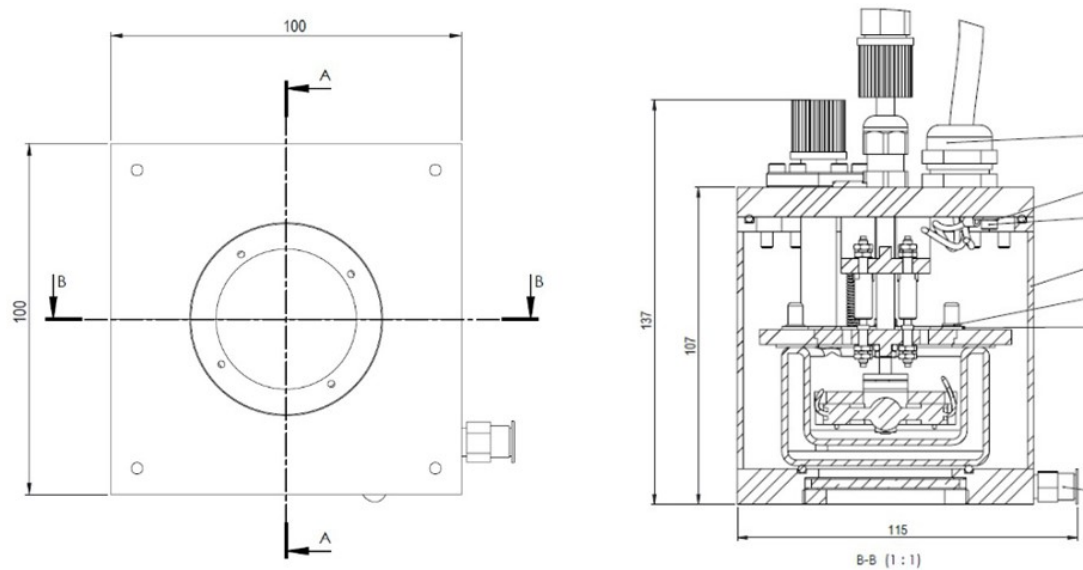

**Figure S5.** Scheme showing the dimensions (in mm) of the reactor used for continuous-flow reactions.

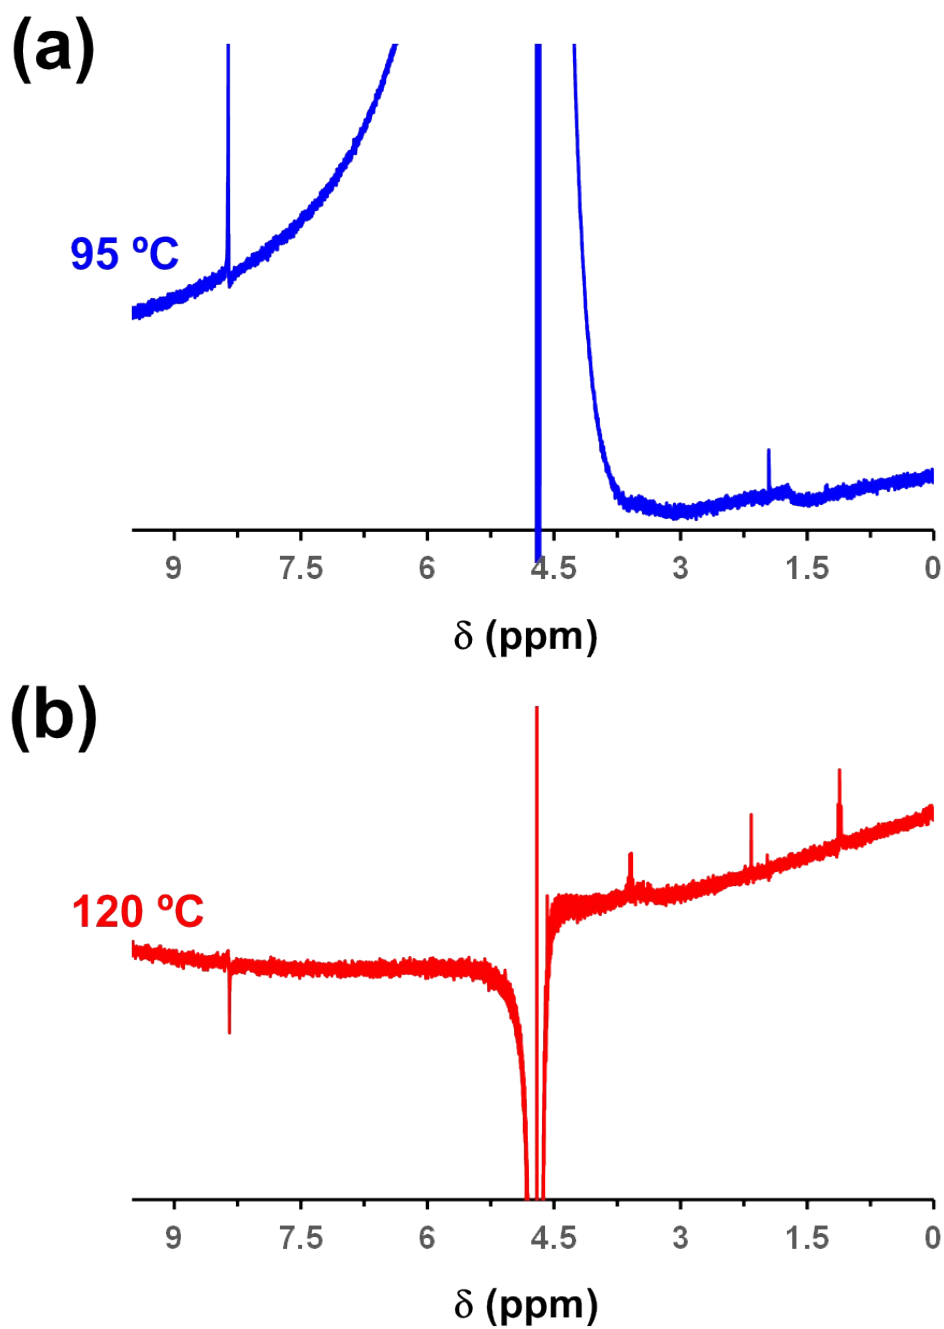

**Figure S6.** Representative  $^1\text{H}$  NMR spectra used to identify the reaction products for the continuous processes catalyzed by upp-HAp and performed at (a)  $95$  and (b)  $120\text{ }^{\circ}\text{C}$  using a  $\text{CO}_2$  flow of  $100\text{ mL/s}$  and  $1\text{ mL}$  of liquid water. Each spectrum corresponds to the liquid collected in the cold trap after  $15\text{ min}$  of reaction.

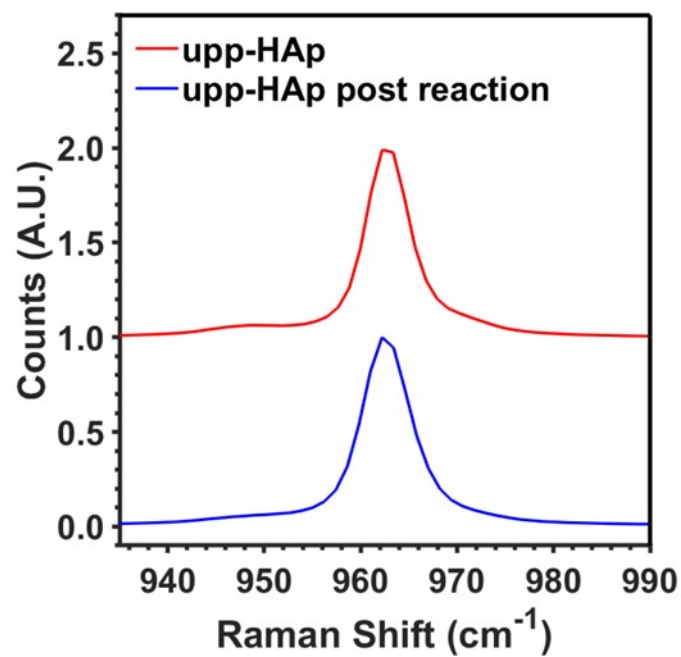

**Figure S7.** Structural studies of the catalyst main vibration  $\nu_1$  peak (962 cm<sup>-1</sup>, symmetric stretching P–O mode) examined before and after the reactions by means of Raman spectroscopy.

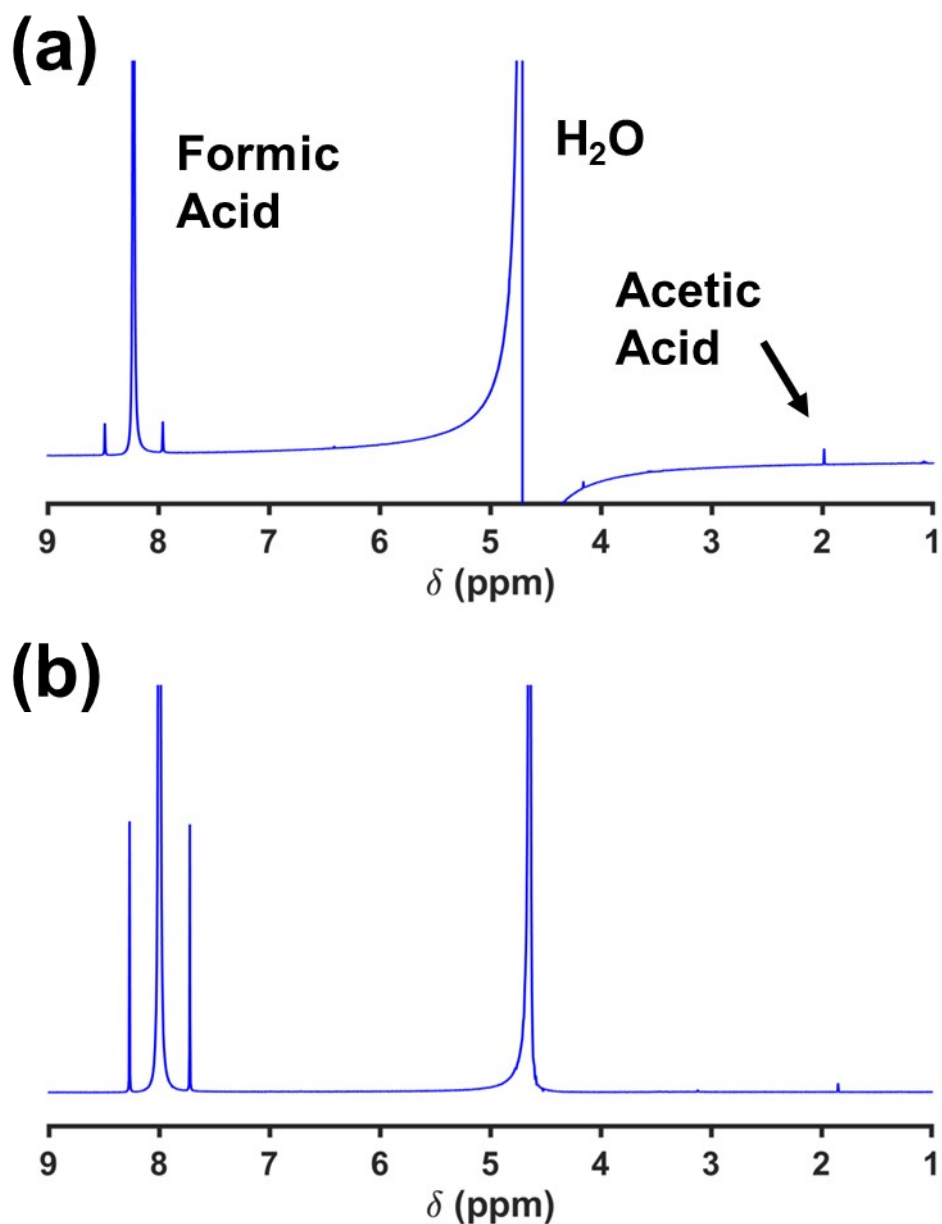

**Figure S8.** <sup>1</sup>H NMR spectra of the batch reaction using formic acid as starting product. The reaction was carried out in an N<sub>2</sub> inert atmosphere, at 95 °C and for 2 hours. 1 mL and 20 mL of liquid formic acid and water respectively, were initially introduced in the reactor. The reactor was extensively purged to avoid the presence of CO<sub>2</sub>. (a) Products absorbed in the catalyst; and (b) Products collected in the supernatant. As it can be observed, the synthesis of acetic acid from formic acid and water is obtained.

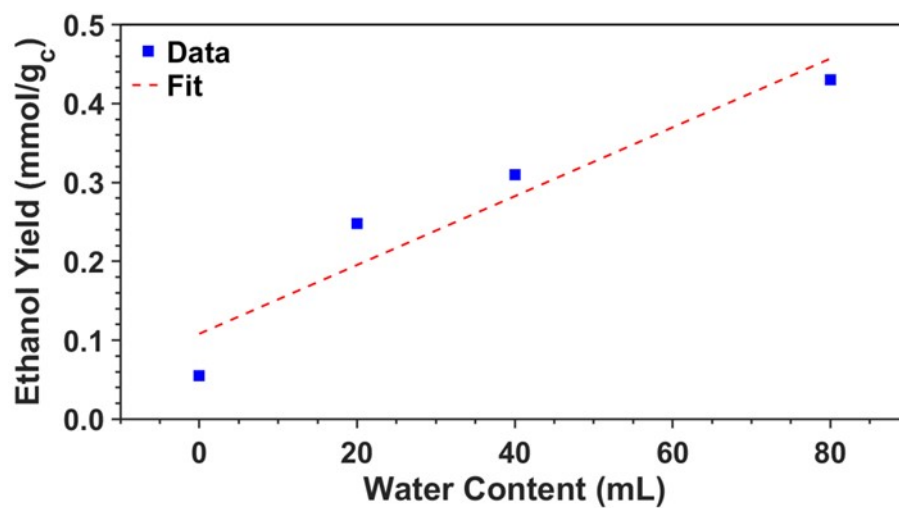

**Figure S9.** Water dependence on the yield of ethanol. As it can be seen, experimental data shows a linear (first-order) regime.

## DATA SUPPORTING THE ARTICLE

### Raman Spectrum

Raman Shift (cm<sup>-1</sup>) Intensity  
(A.U.)

|             |             |             |            |             |            |
|-------------|-------------|-------------|------------|-------------|------------|
| 3602.786133 | 274.933136  | 3550.547852 | 279.272766 | 3493.830078 | 260.598755 |
| 3602.021484 | 282.818420  | 3549.775391 | 267.788422 | 3493.048828 | 272.377045 |
| 3601.257813 | 276.465820  | 3549.002930 | 262.546509 | 3492.267578 | 281.582397 |
| 3600.493164 | 283.778656  | 3548.230469 | 277.059052 | 3491.485352 | 276.913391 |
| 3599.728516 | 255.359802  | 3547.457031 | 280.652679 | 3490.703125 | 255.808411 |
| 3598.964844 | 268.977844  | 3546.684570 | 254.105789 | 3489.921875 | 274.256531 |
| 3598.199219 | 269.459930  | 3545.911133 | 259.780151 | 3489.139648 | 247.510162 |
| 3597.434570 | 261.013824  | 3545.137695 | 260.777405 | 3488.356445 | 270.061096 |
| 3596.669922 | 276.199646  | 3544.365234 | 267.487671 | 3487.574219 | 259.237549 |
| 3595.905273 | 282.455444  | 3543.590820 | 280.427490 | 3486.791992 | 257.656158 |
| 3595.139648 | 293.958466  | 3542.817383 | 270.517151 | 3486.008789 | 257.101624 |
| 3594.374023 | 279.215729  | 3542.043945 | 264.244019 | 3485.226563 | 269.374603 |
| 3593.609375 | 302.784973  | 3541.270508 | 280.811523 | 3484.443359 | 260.097137 |
| 3592.843750 | 297.489655  | 3540.496094 | 259.488403 | 3483.660156 | 266.210541 |
| 3592.078125 | 296.392700  | 3539.721680 | 269.305695 | 3482.876953 | 257.449371 |
| 3591.311523 | 288.477570  | 3538.948242 | 265.630798 | 3482.093750 | 257.920807 |
| 3590.545898 | 297.346405  | 3538.173828 | 267.144348 | 3481.310547 | 271.209167 |
| 3589.780273 | 301.493378  | 3537.399414 | 266.582825 | 3480.526367 | 267.064819 |
| 3589.013672 | 308.784515  | 3536.625000 | 274.837006 | 3479.743164 | 257.796600 |
| 3588.247070 | 318.694153  | 3535.849609 | 273.237427 | 3478.958984 | 277.227783 |
| 3587.481445 | 314.450317  | 3535.075195 | 271.119995 | 3478.174805 | 255.664413 |
| 3586.714844 | 332.215820  | 3534.299805 | 273.668030 | 3477.390625 | 253.574280 |
| 3585.948242 | 319.588531  | 3533.525391 | 274.660553 | 3476.606445 | 250.972626 |
| 3585.180664 | 339.442810  | 3532.750000 | 268.916870 | 3475.822266 | 248.883896 |
| 3584.414063 | 350.910767  | 3531.974609 | 274.054321 | 3475.038086 | 258.572418 |
| 3583.647461 | 366.564362  | 3531.199219 | 272.974365 | 3474.253906 | 275.424988 |
| 3582.879883 | 378.024261  | 3530.423828 | 280.698975 | 3473.468750 | 259.001221 |
| 3582.112305 | 414.084747  | 3529.647461 | 269.779877 | 3472.683594 | 250.771210 |
| 3581.345703 | 429.197205  | 3528.872070 | 275.431580 | 3471.898438 | 264.035034 |
| 3580.578125 | 479.367737  | 3528.095703 | 260.375641 | 3471.114258 | 270.131989 |
| 3579.810547 | 538.940491  | 3527.320313 | 267.062164 | 3470.328125 | 251.673492 |
| 3579.041992 | 648.194275  | 3526.543945 | 278.921295 | 3469.542969 | 261.350616 |
| 3578.274414 | 828.028076  | 3525.767578 | 250.937134 | 3468.757813 | 255.172256 |
| 3577.506836 | 1112.402466 | 3524.991211 | 280.383698 | 3467.971680 | 258.710266 |
| 3576.738281 | 1662.322388 | 3524.213867 | 259.649475 | 3467.186523 | 248.444672 |
| 3575.969727 | 2396.622314 | 3523.437500 | 270.985046 | 3466.400391 | 274.471954 |
| 3575.201172 | 3237.325684 | 3522.661133 | 267.322083 | 3465.614258 | 278.005157 |
| 3574.433594 | 4021.311768 | 3521.883789 | 253.837677 | 3464.828125 | 264.164673 |
| 3573.664063 | 4205.656738 | 3521.106445 | 264.134888 | 3464.041992 | 250.328644 |
| 3572.895508 | 3558.664307 | 3520.330078 | 284.248260 | 3463.255859 | 270.720154 |
| 3572.126953 | 2445.372559 | 3519.552734 | 270.250854 | 3462.469727 | 260.973206 |
| 3571.357422 | 1506.371094 | 3518.774414 | 275.373962 | 3461.682617 | 262.973816 |
| 3570.588867 | 991.726563  | 3517.997070 | 278.945740 | 3460.896484 | 259.868286 |
| 3569.819336 | 730.491211  | 3517.219727 | 273.736115 | 3460.109375 | 271.567261 |
| 3569.049805 | 610.298157  | 3516.441406 | 277.306976 | 3459.322266 | 275.096344 |
| 3568.280273 | 509.979126  | 3515.664063 | 260.223969 | 3458.535156 | 264.846130 |
| 3567.510742 | 475.451782  | 3514.885742 | 273.604309 | 3457.748047 | 261.232086 |
| 3566.741211 | 429.977356  | 3514.107422 | 258.591980 | 3456.960938 | 260.679993 |
| 3565.971680 | 411.125946  | 3513.329102 | 258.034393 | 3456.172852 | 266.248749 |
| 3565.201172 | 364.111481  | 3512.550781 | 268.312683 | 3455.385742 | 273.345612 |
| 3564.431641 | 370.833405  | 3511.772461 | 271.880951 | 3454.597656 | 269.222595 |
| 3563.661133 | 367.123505  | 3510.993164 | 278.027130 | 3453.809570 | 246.237946 |
| 3562.890625 | 322.745697  | 3510.214844 | 257.868744 | 3453.021484 | 265.568054 |
| 3562.120117 | 324.257813  | 3509.435547 | 280.000488 | 3452.233398 | 261.448242 |
| 3561.349609 | 313.781158  | 3508.656250 | 271.190826 | 3451.445313 | 266.501892 |
| 3560.579102 | 302.786682  | 3507.877930 | 276.302155 | 3450.657227 | 247.608261 |
| 3559.807617 | 305.343414  | 3507.098633 | 276.257813 | 3449.868164 | 249.096710 |
| 3559.037109 | 300.084595  | 3506.318359 | 246.840012 | 3449.080078 | 253.131256 |
| 3558.265625 | 305.766296  | 3505.539063 | 269.470978 | 3448.291016 | 264.293823 |
| 3557.494141 | 304.780365  | 3504.759766 | 281.276367 | 3447.501953 | 263.233063 |
| 3556.723633 | 303.795685  | 3503.979492 | 259.082947 | 3446.712891 | 257.591003 |
| 3555.952148 | 302.809753  | 3503.199219 | 266.251282 | 3445.923828 | 259.585602 |
| 3555.180664 | 301.823822  | 3502.419922 | 257.969971 | 3445.134766 | 269.213196 |
| 3554.408203 | 300.836639  | 3501.639648 | 266.680603 | 3444.345703 | 254.413956 |
| 3553.636719 | 281.533722  | 3500.859375 | 261.490356 | 3443.555664 | 253.864349 |
| 3552.864258 | 273.683868  | 3500.079102 | 262.992340 | 3442.766602 | 269.592163 |
| 3552.092773 | 279.882660  | 3499.297852 | 260.377228 | 3441.976563 | 253.274246 |
| 3551.320313 | 296.482361  | 3498.517578 | 270.110870 | 3441.186523 | 261.878082 |
|             |             | 3497.736328 | 261.322449 | 3440.396484 | 273.021240 |
|             |             | 3496.956055 | 265.395172 | 3439.606445 | 265.352356 |
|             |             | 3496.174805 | 286.951019 | 3438.816406 | 259.718933 |
|             |             | 3495.393555 | 262.739136 | 3438.025391 | 256.119995 |
|             |             | 3494.612305 | 259.098358 | 3437.235352 | 256.586975 |

|             |            |             |            |             |            |
|-------------|------------|-------------|------------|-------------|------------|
| 3436.444336 | 261.625854 | 3375.980469 | 254.938446 | 3314.774414 | 277.623016 |
| 3435.653320 | 254.472839 | 3375.180664 | 265.434570 | 3313.963867 | 257.255707 |
| 3434.862305 | 266.112488 | 3374.379883 | 260.375092 | 3313.153320 | 254.736359 |
| 3434.071289 | 250.328979 | 3373.579102 | 257.825226 | 3312.342773 | 248.253708 |
| 3433.280273 | 271.611542 | 3372.778320 | 248.756348 | 3311.532227 | 262.581482 |
| 3432.489258 | 275.628754 | 3371.976563 | 251.223602 | 3310.721680 | 253.127487 |
| 3431.697266 | 266.449097 | 3371.175781 | 256.196869 | 3309.910156 | 265.468750 |
| 3430.906250 | 264.883972 | 3370.375000 | 271.194214 | 3309.099609 | 269.882843 |
| 3430.114258 | 268.900330 | 3369.573242 | 263.632599 | 3308.288086 | 252.015198 |
| 3429.322266 | 263.277100 | 3368.771484 | 256.073425 | 3307.476563 | 261.380432 |
| 3428.531250 | 265.770782 | 3367.969727 | 266.053101 | 3306.665039 | 255.398911 |
| 3427.738281 | 262.685425 | 3367.167969 | 266.511322 | 3305.853516 | 252.883453 |
| 3426.946289 | 244.897064 | 3366.366211 | 273.480835 | 3305.041992 | 243.441605 |
| 3426.154297 | 261.080200 | 3365.564453 | 274.438507 | 3304.229492 | 258.738800 |
| 3425.361328 | 262.558868 | 3364.761719 | 257.369934 | 3303.417969 | 264.632904 |
| 3424.569336 | 260.996338 | 3363.959961 | 260.332428 | 3302.605469 | 247.775284 |
| 3423.776367 | 254.367218 | 3363.157227 | 271.803467 | 3301.792969 | 253.174759 |
| 3422.983398 | 275.604675 | 3362.354492 | 246.735870 | 3300.980469 | 260.550110 |
| 3422.190430 | 259.857513 | 3361.551758 | 268.713745 | 3300.167969 | 273.360596 |
| 3421.397461 | 259.815796 | 3360.749023 | 266.168976 | 3299.355469 | 262.443298 |
| 3420.604492 | 252.684708 | 3359.946289 | 273.629761 | 3298.542969 | 261.906952 |
| 3419.811523 | 259.226044 | 3359.143555 | 264.082825 | 3297.729492 | 268.782043 |
| 3419.017578 | 256.147095 | 3358.339844 | 258.039490 | 3296.916992 | 247.990616 |
| 3418.223633 | 255.599808 | 3357.536133 | 261.497986 | 3296.103516 | 252.890015 |
| 3417.430664 | 273.776825 | 3356.733398 | 265.955231 | 3295.290039 | 270.133972 |
| 3416.636719 | 258.047607 | 3355.929688 | 261.913788 | 3294.476563 | 255.277542 |
| 3415.842773 | 282.289093 | 3355.125977 | 268.368530 | 3293.663086 | 258.198639 |
| 3415.048828 | 269.598419 | 3354.322266 | 286.813385 | 3292.849609 | 259.637939 |
| 3414.253906 | 256.911804 | 3353.517578 | 259.789185 | 3292.035156 | 250.219162 |
| 3413.459961 | 259.904449 | 3352.713867 | 263.244049 | 3291.221680 | 248.698578 |
| 3412.665039 | 255.818161 | 3351.909180 | 245.721558 | 3290.407227 | 255.565781 |
| 3411.871094 | 252.744141 | 3351.105469 | 257.167206 | 3289.592773 | 270.323425 |
| 3411.076172 | 257.757629 | 3350.300781 | 267.111359 | 3288.778320 | 260.908936 |
| 3410.281250 | 276.918610 | 3349.496094 | 264.073303 | 3287.963867 | 259.387604 |
| 3409.486328 | 265.758759 | 3348.691406 | 270.020233 | 3287.149414 | 249.484833 |
| 3408.691406 | 249.550827 | 3347.886719 | 245.025177 | 3286.334961 | 251.909592 |
| 3407.895508 | 264.158142 | 3347.081055 | 288.893646 | 3285.519531 | 242.504105 |
| 3407.100586 | 259.065704 | 3346.276367 | 271.386688 | 3284.705078 | 253.307053 |
| 3406.304688 | 269.122498 | 3345.470703 | 257.376892 | 3283.889648 | 256.715485 |
| 3405.508789 | 247.371185 | 3344.666016 | 267.808502 | 3283.074219 | 263.078735 |
| 3404.713867 | 266.512238 | 3343.860352 | 260.784607 | 3282.258789 | 252.692322 |
| 3403.917969 | 271.011536 | 3343.054688 | 260.244141 | 3281.443359 | 245.264221 |
| 3403.121094 | 243.719833 | 3342.249023 | 267.679413 | 3280.627930 | 251.626221 |
| 3402.325195 | 262.852234 | 3341.442383 | 248.199127 | 3279.811523 | 262.909576 |
| 3401.529297 | 264.827759 | 3340.636719 | 265.600159 | 3278.996094 | 257.452454 |
| 3400.732422 | 280.420166 | 3339.830078 | 261.073364 | 3278.179688 | 246.090881 |
| 3399.936523 | 253.144440 | 3339.024414 | 269.001862 | 3277.363281 | 244.574997 |
| 3399.139648 | 246.549301 | 3338.217773 | 250.031906 | 3276.546875 | 275.533142 |
| 3398.342773 | 250.038467 | 3337.411133 | 261.445526 | 3275.730469 | 239.576920 |
| 3397.545898 | 266.127228 | 3336.604492 | 257.420227 | 3274.914063 | 252.326889 |
| 3396.749023 | 269.108154 | 3335.797852 | 259.868011 | 3274.097656 | 229.172363 |
| 3395.951172 | 274.607483 | 3334.990234 | 276.252045 | 3273.280273 | 251.262344 |
| 3395.154297 | 243.328644 | 3334.183594 | 250.826416 | 3272.462891 | 251.221939 |
| 3394.356445 | 264.948883 | 3333.375977 | 259.245148 | 3271.646484 | 246.266052 |
| 3393.559570 | 259.366455 | 3332.569336 | 257.710968 | 3270.829102 | 254.089966 |
| 3392.761719 | 253.282257 | 3331.761719 | 253.690094 | 3270.011719 | 262.894165 |
| 3391.963867 | 261.800446 | 3330.954102 | 259.617554 | 3269.194336 | 254.499573 |
| 3391.166016 | 254.207672 | 3330.146484 | 273.499420 | 3268.375977 | 254.949890 |
| 3390.368164 | 263.729553 | 3329.337891 | 250.087463 | 3267.558594 | 269.152374 |
| 3389.569336 | 271.235474 | 3328.530273 | 259.492401 | 3266.740234 | 258.305420 |
| 3388.771484 | 264.651093 | 3327.721680 | 261.438812 | 3265.922852 | 252.862946 |
| 3387.972656 | 280.706451 | 3326.914063 | 258.912048 | 3265.104492 | 255.276855 |
| 3387.174805 | 248.470810 | 3326.105469 | 270.298492 | 3264.286133 | 255.235809 |
| 3386.375977 | 256.980133 | 3325.296875 | 253.364120 | 3263.467773 | 264.519196 |
| 3385.577148 | 253.419144 | 3324.488281 | 258.787231 | 3262.648438 | 256.625763 |
| 3384.778320 | 271.476898 | 3323.679688 | 246.826462 | 3261.830078 | 256.584503 |
| 3383.978516 | 261.882843 | 3322.870117 | 267.642029 | 3261.011719 | 251.147491 |
| 3383.179688 | 279.430847 | 3322.061523 | 255.187164 | 3260.192383 | 251.597549 |
| 3382.379883 | 250.743881 | 3321.251953 | 261.102875 | 3259.373047 | 241.259430 |
| 3381.581055 | 250.703598 | 3320.443359 | 259.571960 | 3258.553711 | 254.948639 |
| 3380.781250 | 266.235596 | 3319.633789 | 262.011414 | 3257.734375 | 242.652466 |
| 3379.981445 | 260.668060 | 3318.824219 | 270.403931 | 3256.915039 | 241.143051 |
| 3379.181641 | 262.132690 | 3318.014648 | 273.832977 | 3256.095703 | 266.096802 |
| 3378.381836 | 260.082245 | 3317.204102 | 266.845062 | 3255.275391 | 247.435120 |
| 3377.581055 | 269.076599 | 3316.394531 | 286.638763 | 3254.456055 | 236.127808 |
| 3376.781250 | 272.044952 | 3315.584961 | 249.900879 | 3253.635742 | 251.274033 |



|             |            |             |            |             |            |
|-------------|------------|-------------|------------|-------------|------------|
| 3252.815430 | 238.010803 | 3190.094727 | 253.501877 | 3126.601563 | 227.001602 |
| 3251.995117 | 237.482864 | 3189.264648 | 237.498840 | 3125.761719 | 236.999283 |
| 3251.174805 | 234.017639 | 3188.433594 | 243.747742 | 3124.920898 | 236.483368 |
| 3250.354492 | 266.286865 | 3187.603516 | 246.609802 | 3124.080078 | 245.043289 |
| 3249.533203 | 250.093201 | 3186.772461 | 257.206482 | 3123.238281 | 231.631287 |
| 3248.712891 | 249.074295 | 3185.941406 | 251.364365 | 3122.397461 | 229.206406 |
| 3247.891602 | 265.179871 | 3185.110352 | 238.274399 | 3121.556641 | 227.737183 |
| 3247.070313 | 248.994186 | 3184.279297 | 245.967850 | 3120.714844 | 235.815613 |
| 3246.249023 | 246.019516 | 3183.448242 | 237.231384 | 3119.873047 | 261.550873 |
| 3245.427734 | 250.381180 | 3182.616211 | 250.236404 | 3119.031250 | 238.125671 |
| 3244.606445 | 242.028809 | 3181.785156 | 249.713135 | 3118.189453 | 227.590469 |
| 3243.785156 | 257.633667 | 3180.953125 | 238.082703 | 3117.347656 | 232.801376 |
| 3242.962891 | 265.412872 | 3180.121094 | 240.458633 | 3116.505859 | 256.612640 |
| 3242.141602 | 252.663681 | 3179.289063 | 246.213181 | 3115.663086 | 245.602646 |
| 3241.319336 | 243.339020 | 3178.457031 | 249.552399 | 3114.821289 | 233.165710 |
| 3240.497070 | 243.788437 | 3177.625000 | 238.894684 | 3113.978516 | 234.081635 |
| 3239.674805 | 248.145508 | 3176.791992 | 243.199066 | 3113.135742 | 236.903931 |
| 3238.852539 | 237.360870 | 3175.959961 | 249.431915 | 3112.292969 | 224.950989 |
| 3238.030273 | 247.577362 | 3175.126953 | 242.638397 | 3111.450195 | 239.210175 |
| 3237.207031 | 239.237473 | 3174.293945 | 237.293991 | 3110.607422 | 243.459579 |
| 3236.384766 | 248.474045 | 3173.460938 | 248.347031 | 3109.763672 | 244.373077 |
| 3235.561523 | 246.969833 | 3172.627930 | 245.896301 | 3108.920898 | 248.143982 |
| 3234.738281 | 238.146027 | 3171.794922 | 250.677429 | 3108.077148 | 233.341583 |
| 3233.915039 | 244.450760 | 3170.961914 | 236.659241 | 3107.233398 | 241.398209 |
| 3233.091797 | 235.142349 | 3170.127930 | 240.958405 | 3106.389648 | 237.550888 |
| 3232.268555 | 264.858398 | 3169.294922 | 243.810638 | 3105.545898 | 233.704788 |
| 3231.444336 | 263.352722 | 3168.460938 | 252.443100 | 3104.702148 | 240.329742 |
| 3230.621094 | 235.516495 | 3167.626953 | 250.475739 | 3103.857422 | 239.815201 |
| 3229.796875 | 234.016006 | 3166.792969 | 244.656128 | 3103.013672 | 234.543335 |
| 3228.972656 | 255.913834 | 3165.958984 | 242.209091 | 3102.168945 | 236.883911 |
| 3228.148438 | 239.301865 | 3165.125000 | 252.280579 | 3101.324219 | 245.406418 |
| 3227.324219 | 223.182526 | 3164.290039 | 264.274323 | 3100.479492 | 220.164459 |
| 3226.500000 | 248.969269 | 3163.456055 | 264.231781 | 3099.634766 | 246.278229 |
| 3225.675781 | 241.622101 | 3162.621094 | 230.985123 | 3098.790039 | 236.731262 |
| 3224.850586 | 248.889175 | 3161.786133 | 237.202774 | 3097.944336 | 232.415527 |
| 3224.026367 | 248.849136 | 3160.951172 | 236.202454 | 3097.099609 | 244.733566 |
| 3223.201172 | 255.625793 | 3160.116211 | 223.177795 | 3096.253906 | 235.191437 |
| 3222.375977 | 250.716385 | 3159.281250 | 251.515503 | 3095.408203 | 228.027679 |
| 3221.550781 | 249.702560 | 3158.445313 | 234.165070 | 3094.562500 | 240.815430 |
| 3220.725586 | 253.555740 | 3157.610352 | 230.281326 | 3093.716797 | 228.429092 |
| 3219.900391 | 253.514954 | 3156.774414 | 245.625916 | 3092.871094 | 235.039886 |
| 3219.074219 | 225.256317 | 3155.938477 | 236.454971 | 3092.025391 | 227.405975 |
| 3218.249023 | 235.921677 | 3155.102539 | 235.936386 | 3091.178711 | 236.862823 |
| 3217.422852 | 249.988113 | 3154.266602 | 237.820160 | 3090.333008 | 228.756485 |
| 3216.596680 | 250.434174 | 3153.430664 | 242.105179 | 3089.486328 | 234.888412 |
| 3215.770508 | 242.614655 | 3152.593750 | 240.625336 | 3088.639648 | 222.989410 |
| 3214.944336 | 249.381348 | 3151.757813 | 237.225098 | 3087.792969 | 250.941254 |
| 3214.118164 | 243.994720 | 3150.920898 | 241.988251 | 3086.946289 | 226.237610 |
| 3213.291992 | 243.469498 | 3150.084961 | 264.031982 | 3086.098633 | 238.056549 |
| 3212.464844 | 266.752991 | 3149.248047 | 234.230637 | 3085.251953 | 237.544037 |
| 3211.638672 | 243.876968 | 3148.411133 | 219.795822 | 3084.404297 | 243.668579 |
| 3210.811523 | 243.837723 | 3147.573242 | 231.276245 | 3083.557617 | 221.351913 |
| 3209.984375 | 246.712418 | 3146.736328 | 239.874496 | 3082.709961 | 237.903107 |
| 3209.157227 | 241.816956 | 3145.899414 | 231.201782 | 3081.862305 | 239.760101 |
| 3208.330078 | 235.466568 | 3145.061523 | 249.389130 | 3081.013672 | 232.615097 |
| 3207.501953 | 238.341202 | 3144.223633 | 257.500763 | 3080.166016 | 222.630295 |
| 3206.674805 | 245.097641 | 3143.385742 | 247.870499 | 3079.318359 | 214.543121 |
| 3205.846680 | 242.146622 | 3142.547852 | 233.929062 | 3078.469727 | 218.296783 |
| 3205.019531 | 248.415070 | 3141.709961 | 226.222824 | 3077.621094 | 231.518265 |
| 3204.191406 | 255.166611 | 3140.872070 | 252.063644 | 3076.772461 | 227.693939 |
| 3203.363281 | 245.909988 | 3140.033203 | 244.356964 | 3075.923828 | 238.069824 |
| 3202.535156 | 241.505844 | 3139.195313 | 247.670990 | 3075.075195 | 240.397583 |
| 3201.706055 | 240.982117 | 3138.356445 | 244.278259 | 3074.226563 | 232.788467 |
| 3200.877930 | 239.973755 | 3137.517578 | 238.971024 | 3073.376953 | 230.385590 |
| 3200.048828 | 248.660034 | 3136.678711 | 231.750198 | 3072.528320 | 241.227325 |
| 3199.220703 | 238.927246 | 3135.839844 | 245.117752 | 3071.678711 | 232.675919 |
| 3198.391602 | 242.280716 | 3135.000977 | 228.324875 | 3070.829102 | 242.095261 |
| 3197.562500 | 230.614136 | 3134.161133 | 251.260498 | 3069.979492 | 222.672821 |
| 3196.733398 | 236.874298 | 3133.322266 | 238.778656 | 3069.129883 | 236.344940 |
| 3195.903320 | 219.400375 | 3132.482422 | 234.434250 | 3068.280273 | 237.252060 |
| 3195.074219 | 239.703552 | 3131.642578 | 230.091263 | 3067.429688 | 228.235596 |
| 3194.245117 | 250.316757 | 3130.802734 | 232.445618 | 3066.580078 | 241.427719 |
| 3193.415039 | 245.919632 | 3129.962891 | 233.364594 | 3065.729492 | 225.800095 |
| 3192.584961 | 242.975952 | 3129.123047 | 229.980103 | 3064.878906 | 220.095978 |
| 3191.754883 | 245.356537 | 3128.283203 | 241.416306 | 3064.028320 | 231.394089 |
| 3190.924805 | 253.542679 | 3127.442383 | 247.591095 | 3063.177734 | 233.245422 |

|             |            |             |            |             |            |
|-------------|------------|-------------|------------|-------------|------------|
| 3062.327148 | 238.872772 | 2997.259766 | 229.433548 | 2931.389648 | 226.634949 |
| 3061.476563 | 232.698212 | 2996.398438 | 228.464020 | 2930.517578 | 236.730789 |
| 3060.625000 | 224.637909 | 2995.537109 | 232.156570 | 2929.645508 | 238.534500 |
| 3059.773438 | 229.792068 | 2994.674805 | 244.237762 | 2928.772461 | 238.956375 |
| 3058.922852 | 223.621933 | 2993.813477 | 238.139984 | 2927.900391 | 217.742004 |
| 3058.071289 | 239.151978 | 2992.951172 | 239.033463 | 2927.027344 | 228.292999 |
| 3057.218750 | 236.755310 | 2992.088867 | 234.336105 | 2926.154297 | 228.256104 |
| 3056.367188 | 229.172363 | 2991.226563 | 226.379669 | 2925.282227 | 227.759109 |
| 3055.515625 | 233.850128 | 2990.364258 | 230.534668 | 2924.408203 | 225.882126 |
| 3054.663086 | 234.283813 | 2989.501953 | 222.115738 | 2923.535156 | 219.406036 |
| 3053.811523 | 232.832092 | 2988.638672 | 226.270065 | 2922.662109 | 235.007065 |
| 3052.958984 | 248.345596 | 2987.776367 | 226.233551 | 2921.788086 | 212.897629 |
| 3052.106445 | 227.574158 | 2986.913086 | 237.832672 | 2920.915039 | 228.954407 |
| 3051.253906 | 239.785858 | 2986.049805 | 216.388153 | 2920.041016 | 232.135117 |
| 3050.401367 | 219.493500 | 2985.186523 | 227.054565 | 2919.166992 | 223.824814 |
| 3049.547852 | 231.702545 | 2984.323242 | 244.230331 | 2918.292969 | 230.681519 |
| 3048.695313 | 216.126678 | 2983.459961 | 212.097244 | 2917.418945 | 231.103699 |
| 3047.841797 | 225.978363 | 2982.595703 | 227.874725 | 2916.543945 | 235.200729 |
| 3046.988281 | 232.531906 | 2981.732422 | 215.748581 | 2915.669922 | 216.331329 |
| 3046.134766 | 240.495224 | 2980.868164 | 240.818375 | 2914.794922 | 226.399384 |
| 3045.281250 | 225.869080 | 2980.003906 | 219.397537 | 2913.920898 | 234.168411 |
| 3044.427734 | 234.771851 | 2979.139648 | 231.445633 | 2913.045898 | 234.130569 |
| 3043.574219 | 230.970718 | 2978.275391 | 217.932678 | 2912.169922 | 214.814499 |
| 3042.719727 | 246.454468 | 2977.411133 | 226.260300 | 2911.294922 | 230.842377 |
| 3041.865234 | 237.009583 | 2976.545898 | 230.404510 | 2910.419922 | 232.640488 |
| 3041.011719 | 218.634277 | 2975.681641 | 226.651703 | 2909.543945 | 222.050888 |
| 3040.157227 | 247.275452 | 2974.816406 | 223.828857 | 2908.668945 | 237.611099 |
| 3039.302734 | 240.185135 | 2973.951172 | 234.007324 | 2907.792969 | 217.851410 |
| 3038.448242 | 236.856720 | 2973.085938 | 230.719971 | 2906.916992 | 211.396347 |
| 3037.592773 | 228.360718 | 2972.220703 | 234.395935 | 2906.041016 | 224.199783 |
| 3036.738281 | 227.854080 | 2971.354492 | 233.429932 | 2905.165039 | 222.788315 |
| 3035.882813 | 242.378860 | 2970.489258 | 231.072250 | 2904.288086 | 231.919067 |
| 3035.027344 | 231.068146 | 2969.623047 | 225.931763 | 2903.412109 | 228.673737 |
| 3034.171875 | 240.422379 | 2968.757813 | 233.316895 | 2902.535156 | 219.931152 |
| 3033.316406 | 238.975098 | 2967.891602 | 221.684830 | 2901.658203 | 213.023865 |
| 3032.460938 | 223.915009 | 2967.025391 | 218.403122 | 2900.781250 | 211.615311 |
| 3031.605469 | 236.081940 | 2966.159180 | 226.249496 | 2899.904297 | 225.320129 |
| 3030.749023 | 227.596954 | 2965.291992 | 228.067169 | 2899.027344 | 223.452133 |
| 3029.893555 | 240.697739 | 2964.425781 | 237.763351 | 2898.149414 | 230.741119 |
| 3029.037109 | 229.400024 | 2963.558594 | 215.945084 | 2897.272461 | 219.717926 |
| 3028.180664 | 236.867752 | 2962.692383 | 222.860123 | 2896.394531 | 224.716797 |
| 3027.324219 | 213.381073 | 2961.825195 | 234.405426 | 2895.516602 | 221.019684 |
| 3026.467773 | 231.164612 | 2960.958008 | 228.346283 | 2894.638672 | 243.402618 |
| 3025.610352 | 231.596130 | 2960.090820 | 225.993896 | 2893.760742 | 214.543930 |
| 3024.753906 | 222.652679 | 2959.222656 | 228.735565 | 2892.882813 | 233.261658 |
| 3023.896484 | 222.148087 | 2958.355469 | 225.920914 | 2892.004883 | 230.022827 |
| 3023.040039 | 232.889847 | 2957.487305 | 241.622269 | 2891.125977 | 235.929596 |
| 3022.182617 | 232.852280 | 2956.620117 | 242.971664 | 2890.247070 | 215.319519 |
| 3021.325195 | 232.346283 | 2955.751953 | 235.066040 | 2889.368164 | 223.969223 |
| 3020.467773 | 244.486267 | 2954.883789 | 231.789505 | 2888.489258 | 225.304031 |
| 3019.609375 | 226.183563 | 2954.015625 | 216.949539 | 2887.610352 | 224.353745 |
| 3018.751953 | 227.083496 | 2953.146484 | 226.627090 | 2886.731445 | 224.317474 |
| 3017.893555 | 221.897354 | 2952.278320 | 236.301514 | 2885.852539 | 221.540482 |
| 3017.035156 | 232.158920 | 2951.409180 | 221.467987 | 2884.972656 | 223.331512 |
| 3016.177734 | 244.289124 | 2950.540039 | 231.602386 | 2884.092773 | 223.295395 |
| 3015.318359 | 230.680283 | 2949.671875 | 223.245285 | 2883.212891 | 225.085541 |
| 3014.459961 | 246.549484 | 2948.802734 | 232.913971 | 2882.333008 | 223.223175 |
| 3013.601563 | 224.524963 | 2947.932617 | 225.483459 | 2881.453125 | 225.012756 |
| 3012.743164 | 235.713181 | 2947.063477 | 230.990814 | 2880.573242 | 242.773682 |
| 3011.883789 | 226.790573 | 2946.194336 | 236.496384 | 2879.692383 | 229.046387 |
| 3011.024414 | 235.169601 | 2945.324219 | 230.454376 | 2878.812500 | 228.553162 |
| 3010.165039 | 229.054688 | 2944.454102 | 221.181992 | 2877.931641 | 245.392639 |
| 3009.305664 | 223.409134 | 2943.583984 | 224.378052 | 2877.050781 | 221.182495 |
| 3008.446289 | 223.840393 | 2942.713867 | 220.187317 | 2876.169922 | 218.866867 |
| 3007.586914 | 231.279999 | 2941.843750 | 238.151581 | 2875.289063 | 231.140732 |
| 3006.726563 | 234.512772 | 2940.973633 | 224.269333 | 2874.408203 | 226.089279 |
| 3005.867188 | 220.929565 | 2940.102539 | 209.007401 | 2873.526367 | 216.026184 |
| 3005.006836 | 223.228943 | 2939.232422 | 231.577850 | 2872.644531 | 235.585388 |
| 3004.146484 | 223.192932 | 2938.361328 | 237.997742 | 2871.763672 | 224.612778 |
| 3003.286133 | 222.690063 | 2937.490234 | 219.973999 | 2870.881836 | 230.498352 |
| 3002.425781 | 230.589386 | 2936.619141 | 225.471497 | 2870.000000 | 231.824738 |
| 3001.565430 | 214.217499 | 2935.748047 | 226.357117 | 2869.118164 | 245.451431 |
| 3000.704102 | 221.649017 | 2934.876953 | 229.547104 | 2868.235352 | 222.646255 |
| 2999.843750 | 230.477768 | 2934.004883 | 227.205704 | 2867.353516 | 230.804489 |
| 2998.982422 | 248.166779 | 2933.133789 | 223.482681 | 2866.470703 | 223.029404 |
| 2998.121094 | 239.265045 | 2932.261719 | 225.289429 | 2865.587891 | 222.538239 |

|             |            |             |            |             |            |
|-------------|------------|-------------|------------|-------------|------------|
| 2864.705078 | 214.311981 | 2797.196289 | 222.927765 | 2728.850586 | 229.521149 |
| 2863.822266 | 232.929886 | 2796.302734 | 225.587936 | 2727.946289 | 228.152298 |
| 2862.939453 | 204.690430 | 2795.408203 | 214.318756 | 2727.041016 | 231.221924 |
| 2862.056641 | 217.846344 | 2794.514648 | 226.862549 | 2726.135742 | 236.509186 |
| 2861.172852 | 225.996063 | 2793.620117 | 214.249329 | 2725.230469 | 231.146912 |
| 2860.289063 | 230.505966 | 2792.725586 | 219.154587 | 2724.325195 | 221.794067 |
| 2859.406250 | 220.013489 | 2791.831055 | 236.630646 | 2723.418945 | 222.201599 |
| 2858.522461 | 214.978409 | 2790.936523 | 227.164536 | 2722.513672 | 233.695099 |
| 2857.637695 | 215.398056 | 2790.041016 | 227.576599 | 2721.607422 | 210.601837 |
| 2856.753906 | 234.446014 | 2789.146484 | 223.500580 | 2720.701172 | 226.969788 |
| 2855.870117 | 237.133759 | 2788.250977 | 227.054153 | 2719.794922 | 222.500671 |
| 2854.985352 | 218.018768 | 2787.356445 | 231.055237 | 2718.888672 | 229.998245 |
| 2854.101563 | 218.891754 | 2786.460938 | 215.766129 | 2717.982422 | 230.847092 |
| 2853.216797 | 218.856339 | 2785.565430 | 230.980377 | 2717.075195 | 221.949387 |
| 2852.332031 | 222.452805 | 2784.668945 | 224.216461 | 2716.168945 | 224.571014 |
| 2851.447266 | 217.877701 | 2783.773438 | 227.318649 | 2715.261719 | 210.805634 |
| 2850.561523 | 218.750122 | 2782.877930 | 220.557495 | 2714.354492 | 229.368927 |
| 2849.676758 | 230.966370 | 2781.981445 | 233.071793 | 2713.447266 | 222.690826 |
| 2848.791016 | 218.225647 | 2781.084961 | 216.452759 | 2712.540039 | 232.393066 |
| 2847.906250 | 215.468628 | 2780.188477 | 223.138733 | 2711.632813 | 208.455948 |
| 2847.020508 | 210.444763 | 2779.291992 | 223.102570 | 2710.724609 | 233.202682 |
| 2846.134766 | 227.189148 | 2778.395508 | 222.618500 | 2709.816406 | 234.049713 |
| 2845.249023 | 222.618408 | 2777.498047 | 228.852356 | 2708.909180 | 219.413651 |
| 2844.362305 | 234.368820 | 2776.601563 | 219.411911 | 2708.000977 | 229.550812 |
| 2843.476563 | 229.798386 | 2775.704102 | 218.033234 | 2707.092773 | 230.398010 |
| 2842.589844 | 216.165863 | 2774.806641 | 215.312103 | 2706.183594 | 227.707703 |
| 2841.703125 | 246.488892 | 2773.909180 | 224.228439 | 2705.275391 | 227.670761 |
| 2840.816406 | 228.780777 | 2773.011719 | 221.059677 | 2704.366211 | 220.561707 |
| 2839.929688 | 228.290787 | 2772.114258 | 234.893768 | 2703.458008 | 228.038818 |
| 2839.042969 | 211.497116 | 2771.215820 | 214.725220 | 2702.548828 | 212.536560 |
| 2838.156250 | 229.575333 | 2770.318359 | 216.032227 | 2701.639648 | 225.314041 |
| 2837.268555 | 238.140198 | 2769.419922 | 224.046814 | 2700.730469 | 232.786728 |
| 2836.381836 | 234.027679 | 2768.521484 | 228.034637 | 2699.820313 | 240.698608 |
| 2835.494141 | 218.149094 | 2767.623047 | 216.374268 | 2698.911133 | 216.372803 |
| 2834.606445 | 232.594376 | 2766.724609 | 234.665466 | 2698.000977 | 227.816833 |
| 2833.718750 | 219.435822 | 2765.826172 | 214.069595 | 2697.091797 | 238.815704 |
| 2832.831055 | 238.399918 | 2764.926758 | 226.546326 | 2696.181641 | 225.536072 |
| 2831.942383 | 222.530884 | 2764.028320 | 218.021088 | 2695.271484 | 218.880112 |
| 2831.054688 | 223.399323 | 2763.128906 | 221.112595 | 2694.361328 | 217.520920 |
| 2830.166016 | 226.528229 | 2762.229492 | 219.736893 | 2693.450195 | 216.603317 |
| 2829.277344 | 228.751938 | 2761.330078 | 225.506393 | 2692.540039 | 215.686005 |
| 2828.388672 | 219.674805 | 2760.430664 | 217.433289 | 2691.628906 | 227.999100 |
| 2827.500000 | 222.350845 | 2759.530273 | 214.719635 | 2690.717773 | 232.812347 |
| 2826.611328 | 216.440674 | 2758.630859 | 226.289398 | 2689.806641 | 219.107864 |
| 2825.722656 | 231.766373 | 2757.730469 | 226.698975 | 2688.895508 | 236.703873 |
| 2824.833008 | 227.663437 | 2756.830078 | 235.139755 | 2687.984375 | 226.969666 |
| 2823.943359 | 228.529861 | 2755.929688 | 233.317184 | 2687.072266 | 224.288925 |
| 2823.054688 | 214.494293 | 2755.029297 | 222.574387 | 2686.161133 | 216.762741 |
| 2822.165039 | 222.586456 | 2754.128906 | 229.673798 | 2685.249023 | 227.740143 |
| 2821.274414 | 233.384506 | 2753.227539 | 235.879120 | 2684.336914 | 227.262726 |
| 2820.384766 | 231.089981 | 2752.327148 | 230.490982 | 2683.424805 | 236.033035 |
| 2819.495117 | 225.186005 | 2751.425781 | 235.802643 | 2682.512695 | 236.434998 |
| 2818.604492 | 218.832733 | 2750.524414 | 216.154510 | 2681.600586 | 229.793350 |
| 2817.713867 | 231.880020 | 2749.623047 | 233.943756 | 2680.687500 | 234.157501 |
| 2816.824219 | 219.212921 | 2748.721680 | 225.440659 | 2679.775391 | 220.917252 |
| 2815.933594 | 221.432343 | 2747.820313 | 212.931152 | 2678.862305 | 242.001511 |
| 2815.041992 | 228.160126 | 2746.917969 | 213.342026 | 2677.949219 | 222.165314 |
| 2814.151367 | 229.926529 | 2746.016602 | 223.995056 | 2677.036133 | 227.847412 |
| 2813.260742 | 213.661819 | 2745.114258 | 229.301697 | 2676.123047 | 233.527664 |
| 2812.369141 | 233.908295 | 2744.211914 | 231.935562 | 2675.208984 | 226.454269 |
| 2811.477539 | 231.166718 | 2743.309570 | 235.903870 | 2674.295898 | 216.305649 |
| 2810.585938 | 223.019485 | 2742.407227 | 214.504196 | 2673.381836 | 217.149673 |
| 2809.694336 | 213.523468 | 2741.503906 | 233.157623 | 2672.467773 | 243.045059 |
| 2808.802734 | 229.703232 | 2740.601563 | 233.119812 | 2671.553711 | 218.397430 |
| 2807.911133 | 218.858231 | 2739.698242 | 232.637192 | 2670.639648 | 225.831085 |
| 2807.018555 | 220.173538 | 2738.794922 | 229.931030 | 2669.725586 | 237.215912 |
| 2806.126953 | 229.141479 | 2737.891602 | 223.223709 | 2668.810547 | 231.028351 |
| 2805.234375 | 223.252991 | 2736.988281 | 229.856461 | 2667.896484 | 205.959503 |
| 2804.341797 | 234.017639 | 2736.084961 | 224.929413 | 2666.981445 | 235.344055 |
| 2803.449219 | 224.980515 | 2735.180664 | 229.781906 | 2666.066406 | 227.403778 |
| 2802.555664 | 235.741394 | 2734.277344 | 219.079514 | 2665.151367 | 230.000427 |
| 2801.663086 | 211.863007 | 2733.373047 | 237.704926 | 2664.236328 | 237.423706 |
| 2800.770508 | 232.067108 | 2732.468750 | 209.679489 | 2663.320313 | 231.680878 |
| 2799.876953 | 220.787781 | 2731.564453 | 229.632874 | 2662.405273 | 238.662735 |
| 2798.983398 | 228.395172 | 2730.660156 | 217.605148 | 2661.489258 | 242.133133 |
| 2798.089844 | 235.101028 | 2729.755859 | 221.122009 | 2660.573242 | 232.883728 |

|             |            |             |            |             |            |
|-------------|------------|-------------|------------|-------------|------------|
| 2659.657227 | 239.423447 | 2589.604492 | 225.222061 | 2518.679688 | 221.168289 |
| 2658.741211 | 221.847229 | 2588.676758 | 223.453217 | 2517.741211 | 231.825287 |
| 2657.825195 | 231.016785 | 2587.749023 | 236.406219 | 2516.801758 | 226.655670 |
| 2656.908203 | 225.281479 | 2586.821289 | 247.190445 | 2515.862305 | 221.915329 |
| 2655.992188 | 224.806656 | 2585.893555 | 228.105377 | 2514.922852 | 227.436813 |
| 2655.075195 | 230.027924 | 2584.965820 | 233.694229 | 2513.983398 | 229.109512 |
| 2654.158203 | 225.609772 | 2584.037109 | 234.954285 | 2513.042969 | 239.756516 |
| 2653.241211 | 238.275299 | 2583.108398 | 245.299088 | 2512.103516 | 217.924927 |
| 2652.324219 | 223.784744 | 2582.180664 | 244.394058 | 2511.163086 | 228.997498 |
| 2651.407227 | 222.872650 | 2581.250977 | 231.379730 | 2510.222656 | 231.095993 |
| 2650.489258 | 242.099304 | 2580.322266 | 221.828934 | 2509.282227 | 232.766693 |
| 2649.572266 | 241.184525 | 2579.393555 | 231.304413 | 2508.341797 | 227.604446 |
| 2648.654297 | 235.018234 | 2578.463867 | 247.693192 | 2507.401367 | 236.533417 |
| 2647.736328 | 233.667313 | 2577.535156 | 230.796936 | 2506.459961 | 253.143402 |
| 2646.818359 | 227.504227 | 2576.605469 | 233.352173 | 2505.518555 | 221.944534 |
| 2645.899414 | 239.715500 | 2575.675781 | 236.338638 | 2504.578125 | 234.284012 |
| 2644.981445 | 239.239182 | 2574.746094 | 216.428482 | 2503.636719 | 223.152206 |
| 2644.062500 | 223.894974 | 2573.816406 | 221.144409 | 2502.694336 | 235.487442 |
| 2643.144531 | 247.905899 | 2572.885742 | 227.154358 | 2501.752930 | 219.240601 |
| 2642.225586 | 233.002411 | 2571.956055 | 241.366180 | 2500.811523 | 234.557724 |
| 2641.306641 | 215.481293 | 2571.025391 | 240.463470 | 2499.869141 | 228.549896 |
| 2640.387695 | 226.371536 | 2570.094727 | 237.402832 | 2498.926758 | 235.333893 |
| 2639.467773 | 229.393326 | 2569.164063 | 232.616913 | 2497.984375 | 242.115677 |
| 2638.548828 | 214.502518 | 2568.233398 | 235.168045 | 2497.041992 | 223.750000 |
| 2637.628906 | 237.617920 | 2567.301758 | 238.149780 | 2496.099609 | 238.627762 |
| 2636.708984 | 227.097870 | 2566.371094 | 233.366043 | 2495.157227 | 238.162796 |
| 2635.789063 | 228.370926 | 2565.439453 | 229.877731 | 2494.213867 | 238.549927 |
| 2634.869141 | 224.404541 | 2564.507813 | 242.776917 | 2493.271484 | 235.529648 |
| 2633.949219 | 222.622009 | 2563.576172 | 245.755432 | 2492.328125 | 230.806961 |
| 2633.029297 | 222.585815 | 2562.644531 | 232.351944 | 2491.384766 | 226.511581 |
| 2632.108398 | 242.186371 | 2561.712891 | 239.210281 | 2490.440430 | 231.157379 |
| 2631.187500 | 230.803192 | 2560.781250 | 237.447571 | 2489.497070 | 231.970947 |
| 2630.266602 | 230.329437 | 2559.848633 | 234.823700 | 2488.553711 | 234.912079 |
| 2629.345703 | 228.547363 | 2558.916016 | 218.845901 | 2487.609375 | 225.087357 |
| 2628.424805 | 240.720673 | 2557.983398 | 233.024323 | 2486.665039 | 239.515137 |
| 2627.503906 | 224.548904 | 2557.050781 | 230.402420 | 2485.720703 | 239.901428 |
| 2626.582031 | 220.588882 | 2556.118164 | 231.656677 | 2484.776367 | 242.839310 |
| 2625.661133 | 228.834656 | 2555.185547 | 238.507248 | 2483.832031 | 227.491837 |
| 2624.739258 | 220.081360 | 2554.251953 | 231.150787 | 2482.886719 | 242.334946 |
| 2623.817383 | 247.496811 | 2553.318359 | 250.480164 | 2481.942383 | 238.469696 |
| 2622.895508 | 233.951019 | 2552.385742 | 228.493652 | 2480.997070 | 242.680893 |
| 2621.973633 | 219.538437 | 2551.452148 | 236.630966 | 2480.051758 | 237.966949 |
| 2621.050781 | 239.101212 | 2550.517578 | 234.011414 | 2479.106445 | 233.679428 |
| 2620.128906 | 232.530579 | 2549.583984 | 224.941254 | 2478.161133 | 239.588531 |
| 2619.206055 | 222.043655 | 2548.650391 | 231.355042 | 2477.214844 | 240.398911 |
| 2618.283203 | 225.925323 | 2547.715820 | 253.675171 | 2476.269531 | 217.852509 |
| 2617.360352 | 234.593353 | 2546.781250 | 229.560135 | 2475.323242 | 228.856430 |
| 2616.437500 | 222.805695 | 2545.846680 | 248.434723 | 2474.376953 | 232.639816 |
| 2615.514648 | 231.471405 | 2544.912109 | 230.774597 | 2473.430664 | 230.904022 |
| 2614.590820 | 247.529709 | 2543.977539 | 253.220917 | 2472.484375 | 232.988281 |
| 2613.667969 | 229.221344 | 2543.042969 | 234.995514 | 2471.538086 | 228.707092 |
| 2612.744141 | 231.358505 | 2542.107422 | 243.547989 | 2470.590820 | 227.821289 |
| 2611.820313 | 240.886780 | 2541.171875 | 220.317047 | 2469.644531 | 234.995148 |
| 2610.896484 | 234.761200 | 2540.237305 | 231.445511 | 2468.697266 | 237.925568 |
| 2609.972656 | 226.898911 | 2539.300781 | 232.695786 | 2467.750000 | 231.950180 |
| 2609.047852 | 230.338837 | 2538.365234 | 238.238235 | 2466.802734 | 236.999985 |
| 2608.124023 | 220.307159 | 2537.429688 | 234.765930 | 2465.854492 | 227.635452 |
| 2607.199219 | 232.870682 | 2536.493164 | 239.877106 | 2464.907227 | 233.108139 |
| 2606.274414 | 227.620117 | 2535.557617 | 229.111816 | 2463.958984 | 242.816666 |
| 2605.349609 | 234.532196 | 2534.621094 | 232.935287 | 2463.011719 | 227.524017 |
| 2604.424805 | 243.179016 | 2533.684570 | 228.608246 | 2462.063477 | 235.112152 |
| 2603.500000 | 223.167297 | 2532.748047 | 214.848175 | 2461.115234 | 222.790649 |
| 2602.574219 | 229.208496 | 2531.811523 | 226.818695 | 2460.166016 | 229.953552 |
| 2601.648438 | 235.681763 | 2530.874023 | 222.923447 | 2459.217773 | 222.294495 |
| 2600.723633 | 233.039627 | 2529.937500 | 234.460114 | 2458.268555 | 228.608459 |
| 2599.797852 | 231.700027 | 2529.000000 | 227.993515 | 2457.320313 | 227.301300 |
| 2598.872070 | 224.287323 | 2528.062500 | 238.668610 | 2456.371094 | 241.230148 |
| 2597.945313 | 230.323395 | 2527.125000 | 245.056015 | 2455.421875 | 232.304810 |
| 2597.019531 | 238.092239 | 2526.187500 | 238.162476 | 2454.472656 | 227.190002 |
| 2596.092773 | 231.549301 | 2525.249023 | 235.125702 | 2453.522461 | 224.614899 |
| 2595.166992 | 225.875580 | 2524.311523 | 247.077286 | 2452.573242 | 237.266266 |
| 2594.240234 | 240.576889 | 2523.373047 | 233.764664 | 2451.623047 | 240.610458 |
| 2593.313477 | 242.704742 | 2522.434570 | 231.586212 | 2450.672852 | 242.262360 |
| 2592.386719 | 233.131989 | 2521.496094 | 240.964493 | 2449.722656 | 231.231903 |
| 2591.458984 | 229.194702 | 2520.557617 | 222.952118 | 2448.772461 | 228.235535 |
| 2590.532227 | 230.457001 | 2519.619141 | 219.920746 | 2447.822266 | 237.072647 |

|             |            |             |            |             |            |
|-------------|------------|-------------|------------|-------------|------------|
| 2446.871094 | 236.611420 | 2374.166016 | 224.509918 | 2300.550781 | 201.126022 |
| 2445.920898 | 227.278870 | 2373.203125 | 202.359650 | 2299.576172 | 193.675690 |
| 2444.969727 | 235.267029 | 2372.240234 | 210.669922 | 2298.601563 | 207.652237 |
| 2444.018555 | 222.981522 | 2371.277344 | 216.474854 | 2297.626953 | 205.146561 |
| 2443.067383 | 238.990387 | 2370.314453 | 219.358658 | 2296.650391 | 193.580475 |
| 2442.116211 | 238.107025 | 2369.351563 | 223.075439 | 2295.675781 | 184.489014 |
| 2441.164063 | 224.560730 | 2368.386719 | 208.864502 | 2294.701172 | 201.340042 |
| 2440.212891 | 237.607224 | 2367.423828 | 220.084671 | 2293.724609 | 210.363800 |
| 2439.260742 | 248.117645 | 2366.460938 | 206.712372 | 2292.748047 | 215.268555 |
| 2438.308594 | 247.655228 | 2365.496094 | 214.178986 | 2291.773438 | 190.952652 |
| 2437.356445 | 242.130981 | 2364.531250 | 217.060303 | 2290.796875 | 190.098419 |
| 2436.404297 | 226.907990 | 2363.568359 | 195.780518 | 2289.820313 | 203.643478 |
| 2435.451172 | 236.991577 | 2362.603516 | 213.240906 | 2288.843750 | 195.794754 |
| 2434.499023 | 212.920288 | 2361.638672 | 201.546310 | 2287.867188 | 198.641510 |
| 2433.545898 | 225.953735 | 2360.673828 | 214.420166 | 2286.890625 | 199.020142 |
| 2432.592773 | 227.181290 | 2359.708984 | 207.724579 | 2285.914063 | 195.698456 |
| 2431.639648 | 239.365295 | 2358.744141 | 207.690582 | 2284.935547 | 187.445099 |
| 2430.686523 | 233.848663 | 2357.779297 | 204.743576 | 2283.958984 | 207.142197 |
| 2429.733398 | 219.908218 | 2356.814453 | 223.849640 | 2282.980469 | 201.355225 |
| 2428.779297 | 239.669235 | 2355.847656 | 198.436432 | 2282.003906 | 199.678757 |
| 2427.826172 | 242.156937 | 2354.882813 | 183.430069 | 2281.025391 | 200.467606 |
| 2426.872070 | 226.537659 | 2353.916016 | 219.996887 | 2280.048828 | 202.077637 |
| 2425.917969 | 220.606583 | 2352.951172 | 202.081268 | 2279.070313 | 191.367340 |
| 2424.963867 | 231.935822 | 2351.984375 | 199.138031 | 2278.091797 | 190.104187 |
| 2424.009766 | 215.484100 | 2351.017578 | 208.665817 | 2277.113281 | 201.567703 |
| 2423.054688 | 215.448883 | 2350.050781 | 213.618881 | 2276.134766 | 206.870590 |
| 2422.099609 | 226.352661 | 2349.085938 | 209.844116 | 2275.156250 | 206.015884 |
| 2421.145508 | 227.577667 | 2348.119141 | 200.669540 | 2274.177734 | 204.751129 |
| 2420.190430 | 242.261230 | 2347.150391 | 198.144318 | 2273.197266 | 199.384216 |
| 2419.235352 | 238.436935 | 2346.183594 | 192.712601 | 2272.218750 | 198.531143 |
| 2418.279297 | 233.772964 | 2345.216797 | 191.435272 | 2271.240234 | 197.678329 |
| 2417.324219 | 243.403656 | 2344.250000 | 207.596451 | 2270.259766 | 200.516281 |
| 2416.369141 | 235.798172 | 2343.281250 | 208.807846 | 2269.279297 | 191.463684 |
| 2415.413086 | 212.645950 | 2342.314453 | 206.698380 | 2268.300781 | 182.414063 |
| 2414.457031 | 226.897324 | 2341.345703 | 206.664536 | 2267.320313 | 190.171326 |
| 2413.500977 | 231.481476 | 2340.378906 | 205.385941 | 2266.339844 | 204.072815 |
| 2412.544922 | 223.462845 | 2339.410156 | 199.129517 | 2265.359375 | 197.893570 |
| 2411.587891 | 223.846298 | 2338.441406 | 208.636963 | 2264.378906 | 195.812851 |
| 2410.631836 | 222.130081 | 2337.472656 | 216.897156 | 2263.398438 | 186.360321 |
| 2409.674805 | 229.650864 | 2336.503906 | 204.007507 | 2262.417969 | 207.215057 |
| 2408.717773 | 227.094711 | 2335.535156 | 194.024139 | 2261.437500 | 191.212555 |
| 2407.760742 | 227.897003 | 2334.566406 | 201.868134 | 2260.455078 | 215.334686 |
| 2406.803711 | 225.341965 | 2333.597656 | 199.762848 | 2259.474609 | 189.921875 |
| 2405.846680 | 229.920319 | 2332.628906 | 208.432068 | 2258.492188 | 197.666397 |
| 2404.888672 | 235.336166 | 2331.658203 | 205.083466 | 2257.511719 | 192.723816 |
| 2403.931641 | 235.297699 | 2330.689453 | 232.804108 | 2256.529297 | 208.647583 |
| 2402.972656 | 217.646255 | 2329.718750 | 247.676254 | 2255.546875 | 207.607407 |
| 2402.015625 | 233.124344 | 2328.750000 | 229.415009 | 2254.564453 | 206.567230 |
| 2401.056641 | 242.728302 | 2327.779297 | 216.542236 | 2253.582031 | 205.527039 |
| 2400.099609 | 225.922562 | 2326.808594 | 223.958252 | 2252.599609 | 204.486862 |
| 2399.140625 | 225.466553 | 2325.837891 | 192.878830 | 2251.617188 | 203.446686 |
| 2398.181641 | 225.010681 | 2324.867188 | 194.916412 | 2250.634766 | 202.406509 |
| 2397.222656 | 211.986572 | 2323.896484 | 217.641708 | 2249.652344 | 201.366318 |
| 2396.263672 | 224.518250 | 2322.925781 | 203.126556 | 2248.669922 | 200.326141 |
| 2395.304688 | 213.173691 | 2321.955078 | 203.093292 | 2247.685547 | 199.283890 |
| 2394.345703 | 218.582474 | 2320.984375 | 205.954971 | 2246.703125 | 198.243713 |
| 2393.386719 | 212.685333 | 2320.011719 | 195.170334 | 2245.718750 | 197.201462 |
| 2392.427734 | 205.534286 | 2319.041016 | 206.300934 | 2244.734375 | 196.159225 |
| 2391.466797 | 215.545532 | 2318.068359 | 199.240005 | 2243.751953 | 195.119049 |
| 2390.507813 | 208.396347 | 2317.097656 | 219.045441 | 2242.767578 | 194.076797 |
| 2389.546875 | 214.219849 | 2316.125000 | 200.827621 | 2241.783203 | 193.034546 |
| 2388.587891 | 214.603149 | 2315.152344 | 202.034195 | 2240.798828 | 197.083252 |
| 2387.626953 | 214.149811 | 2314.181641 | 202.414185 | 2239.814453 | 191.339279 |
| 2386.666016 | 216.205750 | 2313.208984 | 199.489868 | 2238.830078 | 201.913422 |
| 2385.705078 | 224.951004 | 2312.236328 | 198.631271 | 2237.843750 | 194.539169 |
| 2384.746094 | 210.700317 | 2311.263672 | 201.901825 | 2236.859375 | 186.759567 |
| 2383.785156 | 217.353653 | 2310.289063 | 200.630280 | 2235.875000 | 209.968094 |
| 2382.822266 | 217.736038 | 2309.316406 | 196.882645 | 2234.888672 | 195.258652 |
| 2381.861328 | 201.822083 | 2308.343750 | 203.040649 | 2233.902344 | 191.966019 |
| 2380.900391 | 208.055817 | 2307.369141 | 200.944290 | 2232.917969 | 193.564514 |
| 2379.939453 | 209.274933 | 2306.396484 | 213.700378 | 2231.931641 | 200.866592 |
| 2378.976563 | 209.240707 | 2305.421875 | 183.141739 | 2230.945313 | 191.464096 |
| 2378.015625 | 220.898666 | 2304.449219 | 183.936554 | 2229.958984 | 203.651764 |
| 2377.052734 | 206.249695 | 2303.474609 | 196.689133 | 2228.972656 | 206.061737 |
| 2376.091797 | 207.468292 | 2302.500000 | 200.779694 | 2227.986328 | 206.435074 |
| 2375.128906 | 222.459778 | 2301.525391 | 192.090363 | 2227.000000 | 197.037811 |

|             |            |             |            |             |            |
|-------------|------------|-------------|------------|-------------|------------|
| 2226.013672 | 188.050644 | 2150.539063 | 211.040237 | 2074.115234 | 203.253113 |
| 2225.027344 | 188.426727 | 2149.539063 | 190.909729 | 2073.103516 | 196.472061 |
| 2224.039063 | 198.568344 | 2148.541016 | 209.765213 | 2072.091797 | 193.264877 |
| 2223.052734 | 202.197250 | 2147.541016 | 199.686127 | 2071.078125 | 196.407257 |
| 2222.064453 | 199.316650 | 2146.541016 | 195.636078 | 2070.066406 | 182.886475 |
| 2221.076172 | 194.810196 | 2145.541016 | 194.398926 | 2069.052734 | 182.063004 |
| 2220.089844 | 194.778198 | 2144.541016 | 197.579605 | 2068.041016 | 201.069092 |
| 2219.101563 | 206.130127 | 2143.541016 | 199.153168 | 2067.027344 | 216.103699 |
| 2218.113281 | 193.494705 | 2142.539063 | 207.149414 | 2066.015625 | 201.795670 |
| 2217.125000 | 187.772842 | 2141.539063 | 202.298676 | 2065.001953 | 200.969589 |
| 2216.136719 | 200.745758 | 2140.539063 | 191.429733 | 2063.988281 | 200.936432 |
| 2215.148438 | 200.712799 | 2139.537109 | 202.232086 | 2062.974609 | 188.619247 |
| 2214.158203 | 189.711487 | 2138.535156 | 194.175018 | 2061.960938 | 190.965286 |
| 2213.169922 | 198.615997 | 2137.535156 | 196.549789 | 2060.947266 | 188.160889 |
| 2212.181641 | 192.491867 | 2136.533203 | 200.929047 | 2059.931641 | 183.377075 |
| 2211.191406 | 188.805923 | 2135.531250 | 192.475174 | 2058.917969 | 197.998718 |
| 2210.203125 | 192.834579 | 2134.529297 | 199.259186 | 2057.904297 | 186.484024 |
| 2209.212891 | 196.861908 | 2133.527344 | 210.049530 | 2056.888672 | 186.453247 |
| 2208.222656 | 188.307037 | 2132.525391 | 203.201477 | 2055.875000 | 199.879715 |
| 2207.232422 | 198.826050 | 2131.523438 | 197.557861 | 2054.859375 | 194.306427 |
| 2206.242188 | 197.981979 | 2130.519531 | 205.939194 | 2053.843750 | 205.748810 |
| 2205.251953 | 202.817047 | 2129.517578 | 195.890427 | 2052.828125 | 195.033508 |
| 2204.261719 | 200.350327 | 2128.515625 | 202.667145 | 2051.812500 | 194.210236 |
| 2203.271484 | 194.640381 | 2127.511719 | 205.436996 | 2050.796875 | 185.477737 |
| 2202.281250 | 195.419266 | 2126.507813 | 205.803558 | 2049.781250 | 198.495636 |
| 2201.291016 | 186.469070 | 2125.505859 | 200.565369 | 2048.765625 | 191.742004 |
| 2200.298828 | 203.866364 | 2124.501953 | 202.933929 | 2047.750000 | 196.058426 |
| 2199.308594 | 182.355438 | 2123.498047 | 196.097137 | 2046.732422 | 196.421280 |
| 2198.316406 | 194.885666 | 2122.494141 | 212.070129 | 2045.716797 | 189.276184 |
| 2197.326172 | 184.320999 | 2121.490234 | 212.435257 | 2044.699219 | 188.454758 |
| 2196.333984 | 213.453186 | 2120.486328 | 195.200241 | 2043.683594 | 190.793762 |
| 2195.341797 | 199.649200 | 2119.482422 | 206.766190 | 2042.666016 | 187.997589 |
| 2194.349609 | 193.137955 | 2118.476563 | 200.334229 | 2041.648438 | 192.705200 |
| 2193.357422 | 205.251251 | 2117.472656 | 201.500641 | 2040.630859 | 188.725159 |
| 2192.365234 | 193.074463 | 2116.468750 | 192.273483 | 2039.613281 | 190.273041 |
| 2191.373047 | 198.708542 | 2115.462891 | 204.631622 | 2038.595703 | 201.292999 |
| 2190.380859 | 202.317596 | 2114.457031 | 199.802643 | 2037.578125 | 185.869308 |
| 2189.386719 | 195.406677 | 2113.453125 | 197.772034 | 2036.560547 | 190.573349 |
| 2188.394531 | 190.925018 | 2112.447266 | 205.329437 | 2035.542969 | 183.046448 |
| 2187.400391 | 182.400482 | 2111.441406 | 210.088501 | 2034.523438 | 192.088150 |
| 2186.408203 | 189.244766 | 2110.435547 | 209.255203 | 2033.505859 | 173.126831 |
| 2185.414063 | 198.108307 | 2109.429688 | 200.835922 | 2032.486328 | 181.772873 |
| 2184.419922 | 183.119003 | 2108.423828 | 198.008362 | 2031.468750 | 193.964172 |
| 2183.427734 | 177.430511 | 2107.416016 | 188.396255 | 2030.449219 | 197.085510 |
| 2182.433594 | 192.757263 | 2106.410156 | 194.351395 | 2029.429688 | 192.717789 |
| 2181.439453 | 187.473083 | 2105.404297 | 201.102585 | 2028.410156 | 187.563431 |
| 2180.445313 | 196.733582 | 2104.396484 | 202.665237 | 2027.390625 | 184.774612 |
| 2179.449219 | 190.642670 | 2103.390625 | 205.424011 | 2026.371094 | 181.986725 |
| 2178.455078 | 190.207489 | 2102.382813 | 195.419754 | 2025.351563 | 187.864349 |
| 2177.460938 | 205.519501 | 2101.375000 | 204.558792 | 2024.332031 | 194.527588 |
| 2176.464844 | 200.641235 | 2100.367188 | 201.734299 | 2023.310547 | 185.046265 |
| 2175.470703 | 200.204605 | 2099.361328 | 206.085846 | 2022.291016 | 194.463318 |
| 2174.474609 | 199.768112 | 2098.353516 | 212.428726 | 2021.269531 | 188.527405 |
| 2173.480469 | 192.875656 | 2097.343750 | 201.236069 | 2020.250000 | 191.250900 |
| 2172.484375 | 194.054245 | 2096.335938 | 195.226578 | 2019.228516 | 179.415649 |
| 2171.488281 | 188.778488 | 2095.328125 | 201.169739 | 2018.207031 | 184.106689 |
| 2170.492188 | 205.283005 | 2094.320313 | 201.136566 | 2017.187500 | 192.729431 |
| 2169.496094 | 200.813599 | 2093.310547 | 206.280334 | 2016.166016 | 183.652588 |
| 2168.500000 | 194.329773 | 2092.302734 | 197.884979 | 2015.144531 | 191.879349 |
| 2167.503906 | 189.460510 | 2091.292969 | 198.250458 | 2014.121094 | 187.130081 |
| 2166.507813 | 185.398941 | 2090.283203 | 197.023682 | 2013.099609 | 187.099152 |
| 2165.509766 | 191.816040 | 2089.275391 | 201.766754 | 2012.078125 | 183.138245 |
| 2164.513672 | 193.799026 | 2088.265625 | 193.377655 | 2011.056641 | 172.891647 |
| 2163.515625 | 201.421143 | 2087.255859 | 200.108887 | 2010.033203 | 184.649200 |
| 2162.519531 | 197.360245 | 2086.246094 | 194.904953 | 2009.011719 | 181.476227 |
| 2161.521484 | 184.843781 | 2085.236328 | 194.872818 | 2007.988281 | 190.086533 |
| 2160.523438 | 205.750824 | 2084.226563 | 198.021759 | 2006.964844 | 193.196533 |
| 2159.527344 | 195.249969 | 2083.214844 | 206.338028 | 2005.941406 | 191.594147 |
| 2158.529297 | 205.683121 | 2082.205078 | 204.316498 | 2004.917969 | 193.132675 |
| 2157.531250 | 191.563705 | 2081.195313 | 194.744308 | 2003.894531 | 182.503754 |
| 2156.531250 | 192.336945 | 2080.183594 | 196.699051 | 2002.871094 | 173.055603 |
| 2155.533203 | 191.500671 | 2079.171875 | 198.653137 | 2001.847656 | 193.821625 |
| 2154.535156 | 199.916321 | 2078.162109 | 204.578979 | 2000.824219 | 190.651291 |
| 2153.537109 | 201.894318 | 2077.150391 | 203.353714 | 1999.800781 | 172.577576 |
| 2152.537109 | 203.469543 | 2076.138672 | 185.053131 | 1998.775391 | 196.862778 |
| 2151.539063 | 199.415588 | 2075.126953 | 194.551666 | 1997.751953 | 183.891190 |

|             |            |             |            |             |            |
|-------------|------------|-------------|------------|-------------|------------|
| 1996.726563 | 170.531860 | 1918.359375 | 188.917572 | 1839.000000 | 162.084473 |
| 1995.703125 | 189.709824 | 1917.322266 | 186.176819 | 1837.949219 | 170.083969 |
| 1994.677734 | 174.002548 | 1916.285156 | 181.501999 | 1836.898438 | 173.112900 |
| 1993.652344 | 174.365616 | 1915.246094 | 178.763382 | 1835.845703 | 173.084137 |
| 1992.626953 | 193.141647 | 1914.208984 | 172.543839 | 1834.794922 | 166.943054 |
| 1991.601563 | 170.390930 | 1913.169922 | 176.383301 | 1833.744141 | 171.116852 |
| 1990.576172 | 186.811569 | 1912.130859 | 187.956299 | 1832.691406 | 164.596222 |
| 1989.550781 | 180.515503 | 1911.091797 | 188.311829 | 1831.640625 | 159.986908 |
| 1988.523438 | 174.221497 | 1910.052734 | 184.027863 | 1830.587891 | 163.014450 |
| 1987.498047 | 183.978790 | 1909.013672 | 186.703201 | 1829.535156 | 166.422699 |
| 1986.472656 | 181.600098 | 1907.974609 | 175.850677 | 1828.482422 | 166.776672 |
| 1985.445313 | 180.004807 | 1906.935547 | 175.435089 | 1827.429688 | 174.762070 |
| 1984.417969 | 183.496292 | 1905.896484 | 180.428650 | 1826.376953 | 172.062439 |
| 1983.392578 | 188.551346 | 1904.855469 | 176.922104 | 1825.324219 | 160.971802 |
| 1982.365234 | 188.129028 | 1903.816406 | 177.665237 | 1824.271484 | 167.428604 |
| 1981.337891 | 188.880035 | 1902.775391 | 181.497421 | 1823.218750 | 159.392990 |
| 1980.310547 | 178.683014 | 1901.736328 | 188.031036 | 1822.164063 | 167.754211 |
| 1979.283203 | 177.480682 | 1900.695313 | 184.911575 | 1821.111328 | 169.251114 |
| 1978.255859 | 175.497009 | 1899.654297 | 178.705353 | 1820.056641 | 159.313538 |
| 1977.226563 | 177.421967 | 1898.613281 | 177.903900 | 1819.001953 | 159.668121 |
| 1976.199219 | 181.299942 | 1897.572266 | 167.456589 | 1817.949219 | 180.215912 |
| 1975.171875 | 174.628601 | 1896.531250 | 169.743515 | 1816.894531 | 160.376923 |
| 1974.142578 | 168.350052 | 1895.490234 | 169.329636 | 1815.839844 | 180.536865 |
| 1973.115234 | 188.239685 | 1894.449219 | 182.413757 | 1814.785156 | 175.556244 |
| 1972.085938 | 179.618103 | 1893.406250 | 173.129364 | 1813.730469 | 169.815765 |
| 1971.056641 | 183.492477 | 1892.365234 | 174.257233 | 1812.673828 | 173.975113 |
| 1970.027344 | 176.045563 | 1891.322266 | 178.082947 | 1811.619141 | 166.333664 |
| 1968.998047 | 187.334564 | 1890.281250 | 173.043243 | 1810.564453 | 171.253326 |
| 1967.968750 | 181.060120 | 1889.238281 | 160.683884 | 1809.507813 | 171.985855 |
| 1966.939453 | 183.371063 | 1888.195313 | 168.362610 | 1808.453125 | 162.826782 |
| 1965.910156 | 183.730804 | 1887.152344 | 174.497971 | 1807.396484 | 159.376343 |
| 1964.880859 | 169.659607 | 1886.109375 | 176.009583 | 1806.339844 | 168.096970 |
| 1963.849609 | 168.461655 | 1885.066406 | 160.192215 | 1805.283203 | 161.985062 |
| 1962.820313 | 172.332718 | 1884.023438 | 180.186340 | 1804.228516 | 176.785278 |
| 1961.789063 | 181.660080 | 1882.980469 | 176.691910 | 1803.171875 | 172.574554 |
| 1960.759766 | 177.342606 | 1881.937500 | 194.752228 | 1802.113281 | 182.047272 |
| 1959.728516 | 180.430847 | 1880.892578 | 161.625214 | 1801.056641 | 159.217377 |
| 1958.697266 | 178.063171 | 1879.849609 | 165.445999 | 1800.000000 | 178.567352 |
| 1957.666016 | 186.214676 | 1878.804688 | 186.961426 | 1798.943359 | 164.862427 |
| 1956.634766 | 179.951767 | 1877.759766 | 173.083694 | 1797.884766 | 165.974411 |
| 1955.603516 | 170.185944 | 1876.716797 | 168.440186 | 1796.826172 | 150.757156 |
| 1954.572266 | 173.662155 | 1875.671875 | 168.796722 | 1795.769531 | 162.881775 |
| 1953.541016 | 165.457840 | 1874.626953 | 180.686325 | 1794.710938 | 174.243118 |
| 1952.509766 | 174.772415 | 1873.582031 | 166.818832 | 1793.652344 | 163.966248 |
| 1951.476563 | 186.808167 | 1872.537109 | 178.704803 | 1792.593750 | 165.077423 |
| 1950.445313 | 177.438385 | 1871.492188 | 179.059402 | 1791.535156 | 165.429382 |
| 1949.412109 | 172.740341 | 1870.445313 | 168.272537 | 1790.476563 | 169.954208 |
| 1948.378906 | 189.438339 | 1869.400391 | 174.006409 | 1789.417969 | 175.236115 |
| 1947.347656 | 187.073410 | 1868.353516 | 173.209412 | 1788.359375 | 180.895493 |
| 1946.314453 | 183.153824 | 1867.308594 | 175.868622 | 1787.298828 | 173.281937 |
| 1945.281250 | 178.457932 | 1866.261719 | 172.384064 | 1786.240234 | 178.181519 |
| 1944.248047 | 185.814301 | 1865.214844 | 167.365204 | 1785.179688 | 178.909973 |
| 1943.214844 | 169.070786 | 1864.169922 | 173.094437 | 1784.121094 | 178.501221 |
| 1942.179688 | 175.260452 | 1863.123047 | 162.704788 | 1783.060547 | 167.482819 |
| 1941.146484 | 174.065811 | 1862.076172 | 162.294113 | 1782.000000 | 176.926376 |
| 1940.113281 | 181.029541 | 1861.029297 | 174.159088 | 1780.939453 | 160.987564 |
| 1939.078125 | 175.561813 | 1859.980469 | 165.308594 | 1779.878906 | 168.914139 |
| 1938.044922 | 172.814301 | 1858.933594 | 162.213287 | 1778.818359 | 164.720673 |
| 1937.009766 | 177.833359 | 1857.886719 | 175.989456 | 1777.757813 | 183.623505 |
| 1935.974609 | 163.439835 | 1856.837891 | 187.460892 | 1776.697266 | 178.671906 |
| 1934.939453 | 175.445526 | 1855.791016 | 165.198837 | 1775.634766 | 184.319336 |
| 1933.906250 | 181.237808 | 1854.742188 | 173.219208 | 1774.574219 | 175.585098 |
| 1932.871094 | 180.431747 | 1853.693359 | 178.171585 | 1773.511719 | 167.988800 |
| 1931.833984 | 180.013885 | 1852.646484 | 168.564468 | 1772.451172 | 181.200989 |
| 1930.798828 | 174.941406 | 1851.597656 | 178.878494 | 1771.388672 | 182.683731 |
| 1929.763672 | 180.342087 | 1850.548828 | 162.763885 | 1770.326172 | 177.359024 |
| 1928.728516 | 181.087753 | 1849.500000 | 160.439392 | 1769.263672 | 169.011261 |
| 1927.691406 | 173.303665 | 1848.449219 | 166.921143 | 1768.201172 | 171.629395 |
| 1926.656250 | 169.010925 | 1847.400391 | 166.893417 | 1767.138672 | 176.892471 |
| 1925.619141 | 179.059875 | 1846.351563 | 171.458328 | 1766.076172 | 173.461807 |
| 1924.582031 | 170.504959 | 1845.300781 | 181.378906 | 1765.013672 | 169.276581 |
| 1923.546875 | 182.487579 | 1844.251953 | 167.575455 | 1763.949219 | 168.115021 |
| 1922.509766 | 171.223236 | 1843.201172 | 170.225311 | 1762.886719 | 170.353363 |
| 1921.472656 | 181.265137 | 1842.152344 | 165.224991 | 1761.822266 | 165.793076 |
| 1920.435547 | 184.333145 | 1841.101563 | 160.608734 | 1760.759766 | 164.632675 |
| 1919.398438 | 181.592270 | 1840.050781 | 157.141006 | 1759.695313 | 173.666092 |

|             |            |             |            |             |            |
|-------------|------------|-------------|------------|-------------|------------|
| 1758.630859 | 185.716278 | 1677.238281 | 165.859360 | 1594.806641 | 159.716629 |
| 1757.566406 | 176.627518 | 1676.160156 | 173.657425 | 1593.714844 | 147.547562 |
| 1756.501953 | 170.183212 | 1675.082031 | 154.998764 | 1592.623047 | 167.020889 |
| 1755.437500 | 170.154861 | 1674.003906 | 169.501587 | 1591.531250 | 154.486847 |
| 1754.373047 | 166.731537 | 1672.925781 | 165.376114 | 1590.439453 | 164.390610 |
| 1753.308594 | 172.738281 | 1671.847656 | 162.369247 | 1589.345703 | 166.569305 |
| 1752.242188 | 172.709503 | 1670.769531 | 157.873993 | 1588.253906 | 162.864990 |
| 1751.177734 | 171.549652 | 1669.689453 | 169.388382 | 1587.160156 | 158.059174 |
| 1750.111328 | 173.405914 | 1668.611328 | 161.171249 | 1586.068359 | 153.622498 |
| 1749.046875 | 165.085083 | 1667.531250 | 162.632950 | 1584.974609 | 157.271332 |
| 1747.980469 | 167.318634 | 1666.451172 | 165.954651 | 1583.880859 | 157.979767 |
| 1746.914063 | 178.217407 | 1665.373047 | 179.320129 | 1582.789063 | 157.953308 |
| 1745.847656 | 172.913666 | 1664.292969 | 155.484009 | 1581.695313 | 161.232300 |
| 1744.781250 | 146.895630 | 1663.212891 | 168.474854 | 1580.601563 | 161.939713 |
| 1743.714844 | 170.973068 | 1662.132813 | 160.266068 | 1579.505859 | 158.241089 |
| 1742.648438 | 184.876190 | 1661.052734 | 165.072495 | 1578.412109 | 164.087982 |
| 1741.582031 | 167.151428 | 1659.970703 | 162.442856 | 1577.318359 | 156.352951 |
| 1740.513672 | 177.662903 | 1658.890625 | 161.672394 | 1576.222656 | 155.959793 |
| 1739.447266 | 169.730118 | 1657.810547 | 158.672592 | 1575.128906 | 164.005524 |
| 1738.378906 | 168.196716 | 1656.728516 | 176.851364 | 1574.033203 | 169.480667 |
| 1737.312500 | 155.377319 | 1655.646484 | 155.276306 | 1572.939453 | 142.310562 |
| 1736.244141 | 175.663727 | 1654.566406 | 164.907074 | 1571.843750 | 158.789032 |
| 1735.175781 | 170.369171 | 1653.484375 | 168.593018 | 1570.748047 | 159.862396 |
| 1734.107422 | 153.419510 | 1652.402344 | 164.851959 | 1569.652344 | 162.401779 |
| 1733.039063 | 165.424835 | 1651.320313 | 166.309311 | 1568.556641 | 151.745071 |
| 1731.970703 | 179.305664 | 1650.238281 | 159.600555 | 1567.460938 | 150.253754 |
| 1730.902344 | 176.644897 | 1649.156250 | 170.706940 | 1566.363281 | 159.755264 |
| 1729.833984 | 164.590561 | 1648.072266 | 155.836823 | 1565.267578 | 165.590088 |
| 1728.763672 | 171.701706 | 1646.990234 | 160.633484 | 1564.171875 | 154.207397 |
| 1727.695313 | 172.048737 | 1645.908203 | 165.799454 | 1563.074219 | 161.139862 |
| 1726.625000 | 169.766510 | 1644.824219 | 167.996872 | 1561.976563 | 164.408340 |
| 1725.556641 | 167.860580 | 1643.742188 | 156.103439 | 1560.880859 | 177.926636 |
| 1724.486328 | 175.341873 | 1642.658203 | 159.784637 | 1559.783203 | 164.719269 |
| 1723.416016 | 176.063431 | 1641.574219 | 176.067322 | 1558.685547 | 162.861740 |
| 1722.345703 | 176.784760 | 1640.490234 | 161.584244 | 1557.587891 | 173.446121 |
| 1721.275391 | 179.006943 | 1639.406250 | 160.816147 | 1556.490234 | 172.685333 |
| 1720.205078 | 171.848022 | 1638.322266 | 152.268173 | 1555.392578 | 160.219269 |
| 1719.134766 | 171.819366 | 1637.238281 | 164.096161 | 1554.292969 | 162.752548 |
| 1718.064453 | 166.164383 | 1636.152344 | 162.216919 | 1553.195313 | 163.090942 |
| 1716.992188 | 167.636780 | 1635.068359 | 155.154175 | 1552.095703 | 168.547791 |
| 1715.921875 | 176.982910 | 1633.984375 | 174.380417 | 1550.998047 | 157.187408 |
| 1714.849609 | 167.205963 | 1632.898438 | 169.539001 | 1549.898438 | 164.470871 |
| 1713.779297 | 177.673553 | 1631.812500 | 163.218781 | 1548.798828 | 150.922409 |
| 1712.707031 | 171.272720 | 1630.728516 | 156.530609 | 1547.701172 | 164.415710 |
| 1711.634766 | 178.363724 | 1629.642578 | 159.834305 | 1546.601563 | 157.812622 |
| 1710.562500 | 162.973267 | 1628.556641 | 157.218094 | 1545.501953 | 155.959930 |
| 1709.490234 | 171.936218 | 1627.470703 | 163.109619 | 1544.400391 | 154.838226 |
| 1708.417969 | 170.409424 | 1626.384766 | 159.014511 | 1543.300781 | 147.509781 |
| 1707.345703 | 164.764038 | 1625.298828 | 153.811569 | 1542.201172 | 160.992325 |
| 1706.273438 | 155.376526 | 1624.210938 | 165.985199 | 1541.099609 | 163.520325 |
| 1705.199219 | 162.463043 | 1623.125000 | 164.478973 | 1540.000000 | 150.355072 |
| 1704.126953 | 165.804428 | 1622.037109 | 152.625732 | 1538.898438 | 151.424500 |
| 1703.052734 | 169.144684 | 1620.951172 | 158.142578 | 1537.796875 | 152.128723 |
| 1701.978516 | 168.742310 | 1619.863281 | 151.466370 | 1536.697266 | 148.820404 |
| 1700.906250 | 164.973267 | 1618.775391 | 158.089661 | 1535.595703 | 159.006882 |
| 1699.832031 | 160.457413 | 1617.687500 | 161.386978 | 1534.494141 | 152.781433 |
| 1698.757813 | 160.056671 | 1616.601563 | 160.621475 | 1533.392578 | 164.057556 |
| 1697.683594 | 167.881897 | 1615.511719 | 162.809708 | 1532.289063 | 156.010773 |
| 1696.609375 | 176.078354 | 1614.423828 | 155.030914 | 1531.187500 | 147.966705 |
| 1695.535156 | 164.461884 | 1613.335938 | 162.755219 | 1530.085938 | 157.415985 |
| 1694.458984 | 166.303009 | 1612.248047 | 160.882996 | 1528.982422 | 164.311798 |
| 1693.384766 | 162.165085 | 1611.158203 | 160.487137 | 1527.880859 | 148.620758 |
| 1692.308594 | 158.775696 | 1610.070313 | 155.664917 | 1526.777344 | 155.151520 |
| 1691.234375 | 177.799103 | 1608.980469 | 153.794800 | 1525.673828 | 164.229080 |
| 1690.158203 | 168.806259 | 1607.890625 | 151.187805 | 1524.572266 | 155.827606 |
| 1689.082031 | 171.391907 | 1606.802734 | 155.218079 | 1523.468750 | 168.178207 |
| 1688.007813 | 169.123245 | 1605.712891 | 156.666611 | 1522.365234 | 155.411346 |
| 1686.931641 | 173.947632 | 1604.623047 | 160.326050 | 1521.259766 | 144.104355 |
| 1685.855469 | 170.186432 | 1603.533203 | 162.510239 | 1520.156250 | 145.535522 |
| 1684.779297 | 175.382172 | 1602.443359 | 152.166641 | 1519.052734 | 152.422882 |
| 1683.701172 | 164.160156 | 1601.351563 | 156.193359 | 1517.947266 | 156.398163 |
| 1682.625000 | 166.743958 | 1600.261719 | 156.903854 | 1516.843750 | 155.280945 |
| 1681.548828 | 166.343140 | 1599.171875 | 161.664932 | 1515.738281 | 155.618469 |
| 1680.470703 | 173.400558 | 1598.080078 | 156.114929 | 1514.634766 | 149.775818 |
| 1679.394531 | 181.574127 | 1596.988281 | 159.033859 | 1513.529297 | 169.378189 |
| 1678.316406 | 165.141495 | 1595.898438 | 150.909637 | 1512.423828 | 163.171753 |



|             |            |             |            |             |            |
|-------------|------------|-------------|------------|-------------|------------|
| 1511.318359 | 150.427094 | 1426.757813 | 153.180420 | 1341.107422 | 161.146317 |
| 1510.212891 | 159.847351 | 1425.638672 | 162.480194 | 1339.974609 | 158.994446 |
| 1509.107422 | 155.098541 | 1424.517578 | 159.583923 | 1338.839844 | 158.259506 |
| 1508.000000 | 150.351318 | 1423.398438 | 159.557037 | 1337.705078 | 166.728500 |
| 1506.894531 | 166.302765 | 1422.277344 | 165.266083 | 1336.570313 | 168.823898 |
| 1505.787109 | 150.300827 | 1421.156250 | 152.693054 | 1335.435547 | 164.902832 |
| 1504.681641 | 154.994385 | 1420.035156 | 165.210419 | 1334.298828 | 160.983078 |
| 1503.574219 | 148.798660 | 1418.914063 | 162.674408 | 1333.164063 | 164.493378 |
| 1502.468750 | 164.739624 | 1417.792969 | 159.780975 | 1332.027344 | 159.867630 |
| 1501.361328 | 158.544327 | 1416.671875 | 154.739365 | 1330.892578 | 154.536163 |
| 1500.253906 | 161.056885 | 1415.550781 | 154.713303 | 1329.755859 | 170.420715 |
| 1499.146484 | 155.589630 | 1414.429688 | 169.726273 | 1328.621094 | 173.573517 |
| 1498.039063 | 161.002777 | 1413.306641 | 169.697678 | 1327.484375 | 164.001022 |
| 1496.929688 | 153.724579 | 1412.185547 | 161.436203 | 1326.347656 | 163.266525 |
| 1495.822266 | 152.248764 | 1411.062500 | 178.945679 | 1325.210938 | 179.138840 |
| 1494.714844 | 149.323700 | 1409.939453 | 172.832413 | 1324.074219 | 163.211349 |
| 1493.605469 | 154.371857 | 1408.816406 | 159.565765 | 1322.935547 | 172.014069 |
| 1492.496094 | 155.795181 | 1407.695313 | 158.823456 | 1321.798828 | 168.453491 |
| 1491.388672 | 159.391541 | 1406.572266 | 156.293152 | 1320.662109 | 169.837387 |
| 1490.279297 | 161.537918 | 1405.447266 | 158.412354 | 1319.523438 | 162.041962 |
| 1489.169922 | 156.440933 | 1404.324219 | 152.307648 | 1318.384766 | 180.369171 |
| 1488.060547 | 162.931915 | 1403.201172 | 152.996918 | 1317.248047 | 167.986710 |
| 1486.951172 | 154.578308 | 1402.078125 | 161.191559 | 1316.109375 | 166.194061 |
| 1485.841797 | 162.877167 | 1400.953125 | 164.737869 | 1314.970703 | 178.866547 |
| 1484.732422 | 154.164474 | 1399.828125 | 158.278915 | 1313.832031 | 161.905060 |
| 1483.621094 | 152.691254 | 1398.705078 | 159.323914 | 1312.693359 | 168.931183 |
| 1482.511719 | 152.665588 | 1397.580078 | 167.154770 | 1311.554688 | 172.076172 |
| 1481.400391 | 162.405991 | 1396.455078 | 158.556000 | 1310.414063 | 169.931747 |
| 1480.289063 | 153.699203 | 1395.330078 | 159.600418 | 1309.275391 | 175.190445 |
| 1479.179688 | 154.396545 | 1394.205078 | 167.784241 | 1308.134766 | 181.504684 |
| 1478.068359 | 157.262772 | 1393.080078 | 161.688187 | 1306.996094 | 178.654984 |
| 1476.957031 | 153.260254 | 1391.955078 | 168.798279 | 1305.855469 | 171.226120 |
| 1475.845703 | 157.209915 | 1390.828125 | 150.215836 | 1304.714844 | 171.549423 |
| 1474.734375 | 144.897873 | 1389.703125 | 161.249664 | 1303.574219 | 168.350632 |
| 1473.621094 | 147.763763 | 1388.576172 | 167.642853 | 1302.433594 | 167.265747 |
| 1472.509766 | 159.659180 | 1387.449219 | 163.691681 | 1301.292969 | 170.054092 |
| 1471.398438 | 157.104218 | 1386.324219 | 151.540817 | 1300.152344 | 166.505142 |
| 1470.285156 | 161.772079 | 1385.197266 | 152.584778 | 1299.011719 | 181.963211 |
| 1469.173828 | 157.051392 | 1384.070313 | 168.599136 | 1297.869141 | 179.821030 |
| 1468.060547 | 140.420044 | 1382.943359 | 164.294067 | 1296.728516 | 171.698288 |
| 1466.947266 | 155.194000 | 1381.816406 | 160.703110 | 1295.585938 | 164.633621 |
| 1465.833984 | 160.219879 | 1380.687500 | 153.550690 | 1294.443359 | 170.233307 |
| 1464.720703 | 162.718506 | 1379.560547 | 170.622681 | 1293.302734 | 170.907837 |
| 1463.607422 | 161.608932 | 1378.433594 | 165.607864 | 1292.160156 | 171.933746 |
| 1462.494141 | 160.499725 | 1377.304688 | 167.360352 | 1291.017578 | 166.279953 |
| 1461.380859 | 153.260483 | 1376.177734 | 160.211609 | 1289.875000 | 162.034027 |
| 1460.265625 | 156.840225 | 1375.048828 | 155.201065 | 1288.730469 | 176.766434 |
| 1459.152344 | 160.418762 | 1373.919922 | 155.886688 | 1287.587891 | 177.087891 |
| 1458.037109 | 145.974533 | 1372.791016 | 159.774689 | 1286.445313 | 176.004013 |
| 1456.921875 | 156.761093 | 1371.662109 | 157.257248 | 1285.300781 | 177.379211 |
| 1455.808594 | 155.293488 | 1370.533203 | 162.566605 | 1284.158203 | 172.081406 |
| 1454.693359 | 152.025116 | 1369.404297 | 162.183502 | 1283.013672 | 168.541016 |
| 1453.578125 | 158.122757 | 1368.273438 | 168.557037 | 1281.869141 | 168.512497 |
| 1452.462891 | 161.337296 | 1367.144531 | 148.262497 | 1280.724609 | 181.120270 |
| 1451.347656 | 166.351105 | 1366.013672 | 168.855652 | 1279.580078 | 168.806412 |
| 1450.230469 | 156.602921 | 1364.884766 | 167.760880 | 1278.435547 | 180.357193 |
| 1449.115234 | 158.016357 | 1363.753906 | 162.046722 | 1277.291016 | 174.713379 |
| 1448.000000 | 155.470581 | 1362.623047 | 163.085297 | 1276.146484 | 171.877655 |
| 1446.882813 | 151.126511 | 1361.492188 | 158.084335 | 1275.000000 | 173.952820 |
| 1445.765625 | 147.143677 | 1360.361328 | 174.751389 | 1273.855469 | 163.053177 |
| 1444.650391 | 166.902634 | 1359.230469 | 161.582230 | 1272.708984 | 171.089203 |
| 1443.533203 | 161.120255 | 1358.099609 | 165.105621 | 1271.562500 | 177.720367 |
| 1442.416016 | 153.182312 | 1356.968750 | 152.297546 | 1270.417969 | 175.937912 |
| 1441.298828 | 161.785065 | 1355.835938 | 156.176239 | 1269.271484 | 161.891541 |
| 1440.181641 | 156.365906 | 1354.705078 | 162.537827 | 1268.125000 | 174.126572 |
| 1439.064453 | 166.762238 | 1353.572266 | 160.026611 | 1266.978516 | 170.944427 |
| 1437.945313 | 155.594589 | 1352.441406 | 161.418655 | 1265.832031 | 169.514526 |
| 1436.828125 | 146.227112 | 1351.308594 | 162.810242 | 1264.683594 | 171.937073 |
| 1435.708984 | 155.901443 | 1350.175781 | 154.625885 | 1263.537109 | 172.958313 |
| 1434.591797 | 162.699219 | 1349.042969 | 164.173615 | 1262.388672 | 173.629135 |
| 1433.472656 | 160.158142 | 1347.910156 | 165.563995 | 1261.242188 | 180.949722 |
| 1432.353516 | 160.131180 | 1346.777344 | 166.244980 | 1260.093750 | 172.520508 |
| 1431.234375 | 166.565826 | 1345.642578 | 168.343353 | 1258.945313 | 175.290344 |
| 1430.115234 | 157.205917 | 1344.509766 | 172.921432 | 1257.796875 | 166.515106 |
| 1428.996094 | 174.404587 | 1343.376953 | 158.012177 | 1256.648438 | 163.688812 |
| 1427.876953 | 164.328918 | 1342.242188 | 169.320770 | 1255.500000 | 175.201294 |

|             |            |             |            |             |             |
|-------------|------------|-------------|------------|-------------|-------------|
| 1254.351563 | 171.325531 | 1166.470703 | 202.956665 | 1077.449219 | 1115.885742 |
| 1253.203125 | 169.199005 | 1165.308594 | 206.028137 | 1076.269531 | 1222.325439 |
| 1252.054688 | 170.917969 | 1164.144531 | 205.303024 | 1075.089844 | 1101.540283 |
| 1250.904297 | 171.937408 | 1162.978516 | 196.298431 | 1073.912109 | 868.753967  |
| 1249.753906 | 184.836334 | 1161.814453 | 201.439026 | 1072.732422 | 670.437073  |
| 1248.605469 | 167.686981 | 1160.650391 | 200.025314 | 1071.550781 | 526.317444  |
| 1247.455078 | 183.376556 | 1159.484375 | 200.336121 | 1070.371094 | 470.064941  |
| 1246.304688 | 180.551666 | 1158.320313 | 206.162888 | 1069.191406 | 447.523560  |
| 1245.154297 | 175.981842 | 1157.154297 | 210.264191 | 1068.011719 | 450.509613  |
| 1244.003906 | 173.857361 | 1155.990234 | 216.431915 | 1066.830078 | 458.597748  |
| 1242.853516 | 179.063675 | 1154.824219 | 192.619232 | 1065.648438 | 486.071533  |
| 1241.703125 | 181.127289 | 1153.658203 | 208.778915 | 1064.468750 | 526.119263  |
| 1240.550781 | 174.815796 | 1152.492188 | 225.966476 | 1063.287109 | 554.592285  |
| 1239.400391 | 172.344040 | 1151.326172 | 214.907181 | 1062.105469 | 598.694275  |
| 1238.248047 | 176.151794 | 1150.158203 | 222.790558 | 1060.923828 | 616.267822  |
| 1237.097656 | 183.445831 | 1148.992188 | 227.572678 | 1059.742188 | 604.267700  |
| 1235.945313 | 195.967834 | 1147.826172 | 218.928314 | 1058.560547 | 663.629639  |
| 1234.792969 | 184.429565 | 1146.658203 | 220.956100 | 1057.376953 | 743.355835  |
| 1233.640625 | 194.855667 | 1145.492188 | 231.930038 | 1056.195313 | 857.702637  |
| 1232.488281 | 184.367035 | 1144.324219 | 225.009583 | 1055.011719 | 1012.086304 |
| 1231.335938 | 190.608078 | 1143.156250 | 226.347290 | 1053.830078 | 1049.266113 |
| 1230.181641 | 201.724625 | 1141.988281 | 226.996674 | 1052.646484 | 1118.686768 |
| 1229.029297 | 201.342072 | 1140.820313 | 221.456039 | 1051.462891 | 1115.780273 |
| 1227.876953 | 193.993988 | 1139.652344 | 221.074570 | 1050.279297 | 1226.911377 |
| 1226.722656 | 193.264648 | 1138.484375 | 232.381012 | 1049.095703 | 1414.355225 |
| 1225.568359 | 195.669037 | 1137.314453 | 234.747391 | 1047.912109 | 1609.877686 |
| 1224.416016 | 201.553680 | 1136.146484 | 231.958328 | 1046.728516 | 1668.288208 |
| 1223.261719 | 188.641739 | 1134.976563 | 242.569946 | 1045.544922 | 1532.338379 |
| 1222.107422 | 190.697678 | 1133.808594 | 215.733734 | 1044.359375 | 1375.071167 |
| 1220.953125 | 208.061813 | 1132.638672 | 226.001038 | 1043.173828 | 1298.889893 |
| 1219.796875 | 199.677628 | 1131.468750 | 240.385742 | 1041.990234 | 1249.853760 |
| 1218.642578 | 195.122223 | 1130.298828 | 228.327606 | 1040.804688 | 1224.898438 |
| 1217.488281 | 189.177338 | 1129.128906 | 230.348495 | 1039.619141 | 1128.788086 |
| 1216.332031 | 182.539078 | 1127.958984 | 231.682236 | 1038.433594 | 1033.049438 |
| 1215.177734 | 193.632416 | 1126.787109 | 242.624405 | 1037.248047 | 919.389160  |
| 1214.021484 | 197.422897 | 1125.617188 | 230.917175 | 1036.062500 | 808.138550  |
| 1212.865234 | 200.169540 | 1124.447266 | 234.651505 | 1034.876953 | 784.295654  |
| 1211.708984 | 195.618637 | 1123.275391 | 234.268585 | 1033.689453 | 820.390320  |
| 1210.552734 | 174.046738 | 1122.103516 | 246.574585 | 1032.503906 | 851.056152  |
| 1209.396484 | 191.731537 | 1120.933594 | 244.475327 | 1031.316406 | 926.050964  |
| 1208.240234 | 181.975143 | 1119.761719 | 242.033951 | 1030.128906 | 1011.172485 |
| 1207.083984 | 180.208160 | 1118.589844 | 236.165741 | 1028.943359 | 1031.301025 |
| 1205.925781 | 192.328278 | 1117.417969 | 271.081726 | 1027.755859 | 1009.812317 |
| 1204.769531 | 187.089081 | 1116.244141 | 265.210541 | 1026.568359 | 933.198120  |
| 1203.611328 | 192.610062 | 1115.072266 | 267.220947 | 1025.380859 | 763.610596  |
| 1202.455078 | 190.148468 | 1113.900391 | 249.363754 | 1024.191406 | 636.346191  |
| 1201.296875 | 192.891632 | 1112.726563 | 263.362762 | 1023.003906 | 551.383301  |
| 1200.138672 | 192.858887 | 1111.554688 | 262.633087 | 1021.816406 | 508.024231  |
| 1198.980469 | 201.149597 | 1110.380859 | 271.147308 | 1020.626953 | 494.081573  |
| 1197.822266 | 203.889465 | 1109.207031 | 289.243011 | 1019.437500 | 484.198334  |
| 1196.664063 | 189.987183 | 1108.033203 | 266.263611 | 1018.250000 | 487.156128  |
| 1195.503906 | 180.595825 | 1106.859375 | 267.244843 | 1017.060547 | 501.935059  |
| 1194.345703 | 189.229538 | 1105.685547 | 280.542175 | 1015.871094 | 466.726624  |
| 1193.187500 | 195.088181 | 1104.511719 | 291.098480 | 1014.681641 | 478.802673  |
| 1192.027344 | 189.858215 | 1103.337891 | 299.257080 | 1013.492188 | 472.981628  |
| 1190.867188 | 186.015594 | 1102.162109 | 302.967590 | 1012.300781 | 457.036194  |
| 1189.708984 | 194.642502 | 1100.988281 | 309.753815 | 1011.111328 | 461.007935  |
| 1188.548828 | 192.185486 | 1099.812500 | 333.629395 | 1009.921875 | 447.431976  |
| 1187.388672 | 185.920868 | 1098.636719 | 360.572815 | 1008.730469 | 428.462708  |
| 1186.228516 | 193.158722 | 1097.462891 | 352.993622 | 1007.539063 | 436.822357  |
| 1185.066406 | 196.240860 | 1096.287109 | 404.865631 | 1006.349609 | 436.410461  |
| 1183.906250 | 198.629852 | 1095.111328 | 401.380676 | 1005.158203 | 437.684662  |
| 1182.746094 | 195.828232 | 1093.933594 | 410.875488 | 1003.966797 | 431.878479  |
| 1181.583984 | 186.800858 | 1092.757813 | 428.904144 | 1002.775391 | 415.287537  |
| 1180.423828 | 188.498474 | 1091.582031 | 444.878113 | 1001.582031 | 424.316254  |
| 1179.261719 | 192.961990 | 1090.404297 | 470.404877 | 1000.390625 | 428.624329  |
| 1178.099609 | 179.099167 | 1089.228516 | 459.061523 | 999.199219  | 432.930908  |
| 1176.937500 | 187.711060 | 1088.050781 | 485.942169 | 998.005859  | 413.993103  |
| 1175.775391 | 194.246231 | 1086.875000 | 492.000854 | 996.814453  | 439.182037  |
| 1174.613281 | 190.757477 | 1085.697266 | 498.398590 | 995.621094  | 433.382416  |
| 1173.451172 | 191.761627 | 1084.519531 | 508.887054 | 994.427734  | 445.428833  |
| 1172.289063 | 196.910919 | 1083.341797 | 515.961731 | 993.234375  | 460.837372  |
| 1171.125000 | 192.732681 | 1082.164063 | 543.150696 | 992.041016  | 475.567474  |
| 1169.962891 | 187.174484 | 1080.984375 | 628.624695 | 990.847656  | 485.581390  |
| 1168.798828 | 204.406769 | 1079.806641 | 712.024536 | 989.654297  | 510.732178  |
| 1167.634766 | 208.169495 | 1078.626953 | 911.604065 | 988.458984  | 551.012024  |

|            |              |            |              |            |             |
|------------|--------------|------------|--------------|------------|-------------|
| 987.265625 | 574.124939   | 895.902344 | 866.481750   | 803.339844 | 557.706238  |
| 986.070313 | 637.919678   | 894.691406 | 955.289856   | 802.113281 | 671.949829  |
| 984.876953 | 671.096375   | 893.482422 | 1042.740112  | 800.886719 | 855.270081  |
| 983.681641 | 716.027466   | 892.271484 | 1209.131958  | 799.660156 | 1165.600220 |
| 982.486328 | 780.773376   | 891.060547 | 1360.869507  | 798.433594 | 1597.635376 |
| 981.291016 | 858.939087   | 889.849609 | 1613.060059  | 797.207031 | 2322.540283 |
| 980.095703 | 964.293213   | 888.638672 | 1949.733276  | 795.980469 | 3163.400635 |
| 978.900391 | 1099.509399  | 887.427734 | 2412.957031  | 794.751953 | 3908.077637 |
| 977.703125 | 1265.915649  | 886.214844 | 3088.863770  | 793.525391 | 4258.845215 |
| 976.507813 | 1500.100220  | 885.003906 | 4051.594238  | 792.296875 | 3972.165527 |
| 975.312500 | 1904.771240  | 883.791016 | 5630.096191  | 791.070313 | 3187.391113 |
| 974.115234 | 2409.007568  | 882.580078 | 7750.491211  | 789.841797 | 2301.172119 |
| 972.917969 | 2988.927246  | 881.367188 | 10649.049805 | 788.613281 | 1552.925537 |
| 971.720703 | 3623.349365  | 880.154297 | 13490.301758 | 787.384766 | 1140.054443 |
| 970.525391 | 4191.454590  | 878.941406 | 15478.428711 | 786.156250 | 863.310974  |
| 969.328125 | 4773.119629  | 877.728516 | 15400.273438 | 784.927734 | 699.092773  |
| 968.128906 | 5450.514648  | 876.515625 | 13101.956055 | 783.697266 | 587.868774  |
| 966.931641 | 6814.157227  | 875.302734 | 9834.213867  | 782.468750 | 528.958069  |
| 965.734375 | 9385.423828  | 874.087891 | 6861.487305  | 781.238281 | 492.934021  |
| 964.535156 | 13100.333984 | 872.875000 | 4698.510742  | 780.009766 | 438.632416  |
| 963.337891 | 17208.488281 | 871.660156 | 3427.580322  | 778.779297 | 393.166382  |
| 962.138672 | 19271.279297 | 870.445313 | 2621.516357  | 777.548828 | 369.917572  |
| 960.939453 | 17106.431641 | 869.232422 | 2025.414429  | 776.318359 | 363.977936  |
| 959.742188 | 11990.844727 | 868.017578 | 1623.955200  | 775.087891 | 346.290619  |
| 958.542969 | 7384.469238  | 866.802734 | 1370.751831  | 773.857422 | 333.177948  |
| 957.343750 | 4687.929688  | 865.587891 | 1158.294556  | 772.625000 | 317.459595  |
| 956.142578 | 3392.625488  | 864.371094 | 989.537231   | 771.394531 | 308.270935  |
| 954.943359 | 2789.096436  | 863.156250 | 901.467529   | 770.162109 | 277.559113  |
| 953.744141 | 2482.342773  | 861.941406 | 807.150635   | 768.931641 | 284.033264  |
| 952.542969 | 2336.670898  | 860.724609 | 751.515442   | 767.699219 | 287.244751  |
| 951.343750 | 2344.301270  | 859.507813 | 709.440796   | 766.466797 | 283.609375  |
| 950.142578 | 2428.877197  | 858.292969 | 698.091309   | 765.234375 | 271.501007  |
| 948.941406 | 2448.531250  | 857.076172 | 697.641235   | 764.001953 | 270.476563  |
| 947.740234 | 2466.171631  | 855.859375 | 732.512939   | 762.769531 | 273.688141  |
| 946.539063 | 2348.046143  | 854.642578 | 794.437012   | 761.537109 | 265.496887  |
| 945.337891 | 2245.340088  | 853.423828 | 930.918884   | 760.302734 | 266.753937  |
| 944.136719 | 2049.407715  | 852.207031 | 1223.744995  | 759.070313 | 263.125763  |
| 942.933594 | 1809.426270  | 850.990234 | 1665.577515  | 757.835938 | 257.870880  |
| 941.732422 | 1573.871094  | 849.771484 | 2285.693848  | 756.601563 | 250.339035  |
| 940.529297 | 1336.391968  | 848.554688 | 2899.001709  | 755.367188 | 240.856873  |
| 939.328125 | 1134.736450  | 847.335938 | 3228.216064  | 754.132813 | 245.696732  |
| 938.125000 | 987.589294   | 846.117188 | 2932.619141  | 752.898438 | 257.367676  |
| 936.921875 | 890.247559   | 844.898438 | 2242.263672  | 751.664063 | 244.310730  |
| 935.718750 | 806.293884   | 843.679688 | 1533.691284  | 750.429688 | 246.870651  |
| 934.515625 | 714.023682   | 842.460938 | 1116.627930  | 749.195313 | 245.202072  |
| 933.312500 | 659.499329   | 841.242188 | 821.596741   | 747.958984 | 235.080246  |
| 932.109375 | 604.326233   | 840.021484 | 675.213989   | 746.722656 | 241.216400  |
| 930.904297 | 570.191345   | 838.802734 | 597.049988   | 745.488281 | 240.199677  |
| 929.701172 | 535.734558   | 837.582031 | 530.436951   | 744.251953 | 233.658707  |
| 928.496094 | 514.964172   | 836.361328 | 485.244965   | 743.015625 | 245.315552  |
| 927.291016 | 494.867798   | 835.142578 | 455.209229   | 741.779297 | 237.801331  |
| 926.087891 | 481.113098   | 833.921875 | 433.740112   | 740.542969 | 226.716782  |
| 924.882813 | 507.699005   | 832.701172 | 421.162292   | 739.306641 | 239.343033  |
| 923.677734 | 513.278076   | 831.478516 | 395.100708   | 738.068359 | 232.158401  |
| 922.472656 | 529.518860   | 830.257813 | 376.284332   | 736.832031 | 224.651596  |
| 921.265625 | 521.098511   | 829.037109 | 356.487823   | 735.593750 | 235.324127  |
| 920.060547 | 511.015381   | 827.814453 | 349.850372   | 734.355469 | 231.064636  |
| 918.855469 | 495.273560   | 826.593750 | 346.173950   | 733.119141 | 218.045837  |
| 917.648438 | 474.541901   | 825.371094 | 338.883118   | 731.880859 | 226.443039  |
| 916.441406 | 453.151459   | 824.148438 | 324.036163   | 730.642578 | 227.052673  |
| 915.236328 | 462.727814   | 822.927734 | 328.909149   | 729.404297 | 229.283615  |
| 914.029297 | 444.009399   | 821.705078 | 319.325378   | 728.164063 | 228.377518  |
| 912.822266 | 433.949738   | 820.480469 | 307.117126   | 726.925781 | 239.578644  |
| 911.615234 | 460.493469   | 819.257813 | 313.960907   | 725.685547 | 234.675232  |
| 910.406250 | 467.400543   | 818.035156 | 322.115753   | 724.447266 | 238.199600  |
| 909.199219 | 488.940216   | 816.812500 | 311.226501   | 723.207031 | 221.309174  |
| 907.992188 | 503.156250   | 815.587891 | 326.600311   | 721.966797 | 217.707291  |
| 906.783203 | 532.994812   | 814.363281 | 322.605896   | 720.728516 | 228.034927  |
| 905.576172 | 551.852539   | 813.140625 | 338.956787   | 719.488281 | 207.916397  |
| 904.367188 | 558.737976   | 811.916016 | 352.677490   | 718.246094 | 209.823303  |
| 903.158203 | 585.892944   | 810.691406 | 363.113281   | 717.005859 | 216.585724  |
| 901.949219 | 598.086487   | 809.466797 | 375.841217   | 715.765625 | 212.987732  |
| 900.740234 | 645.490356   | 808.242188 | 388.892639   | 714.523438 | 212.950943  |
| 899.531250 | 685.570557   | 807.015625 | 417.348328   | 713.283203 | 229.093048  |
| 898.322266 | 718.994995   | 805.791016 | 443.827454   | 712.041016 | 214.818512  |
| 897.111328 | 760.376892   | 804.564453 | 483.734528   | 710.798828 | 210.252884  |

|            |            |            |             |            |             |
|------------|------------|------------|-------------|------------|-------------|
| 709.556641 | 227.033890 | 614.537109 | 732.208374  | 518.253906 | 228.373978  |
| 708.314453 | 219.234161 | 613.277344 | 716.763306  | 516.978516 | 229.908966  |
| 707.072266 | 229.541840 | 612.019531 | 732.273621  | 515.703125 | 220.737183  |
| 705.830078 | 230.795166 | 610.759766 | 800.097534  | 514.427734 | 225.106445  |
| 704.587891 | 222.029236 | 609.500000 | 880.975342  | 513.152344 | 236.714111  |
| 703.343750 | 230.715408 | 608.240234 | 956.084778  | 511.875000 | 244.226318  |
| 702.101563 | 222.275589 | 606.980469 | 975.368958  | 510.599609 | 244.498474  |
| 700.857422 | 227.082474 | 605.720703 | 871.909607  | 509.322266 | 228.410553  |
| 699.613281 | 226.074341 | 604.460938 | 720.674866  | 508.044922 | 247.873550  |
| 698.371094 | 226.681091 | 603.201172 | 618.251587  | 506.767578 | 242.169296  |
| 697.126953 | 231.807541 | 601.939453 | 553.462219  | 505.490234 | 237.095932  |
| 695.880859 | 209.817352 | 600.679688 | 571.206482  | 504.212891 | 237.054657  |
| 694.636719 | 218.495071 | 599.417969 | 570.470337  | 502.935547 | 246.757980  |
| 693.392578 | 232.655426 | 598.156250 | 647.121521  | 501.658203 | 252.057892  |
| 692.146484 | 219.387421 | 596.894531 | 740.303467  | 500.378906 | 246.672058  |
| 690.902344 | 220.962372 | 595.634766 | 898.079041  | 499.101563 | 262.023804  |
| 689.656250 | 220.601654 | 594.371094 | 1124.870850 | 497.822266 | 265.747650  |
| 688.412109 | 226.690277 | 593.109375 | 1288.889771 | 496.542969 | 260.676300  |
| 687.166016 | 221.815018 | 591.847656 | 1462.397461 | 495.263672 | 260.944916  |
| 685.919922 | 226.934250 | 590.583984 | 1474.869141 | 493.984375 | 266.236755  |
| 684.673828 | 226.250427 | 589.322266 | 1373.464111 | 492.705078 | 281.257782  |
| 683.425781 | 223.955643 | 588.058594 | 1202.447144 | 491.425781 | 302.236694  |
| 682.179688 | 218.117630 | 586.794922 | 1049.931641 | 490.144531 | 299.673706  |
| 680.933594 | 212.603760 | 585.533203 | 927.988647  | 488.865234 | 302.758911  |
| 679.685547 | 219.008408 | 584.269531 | 902.081116  | 487.583984 | 317.763062  |
| 678.437500 | 226.698914 | 583.003906 | 912.412048  | 486.304688 | 351.893433  |
| 677.191406 | 234.386734 | 581.740234 | 1022.512146 | 485.023438 | 349.637115  |
| 675.943359 | 221.791931 | 580.476563 | 1172.285522 | 483.742188 | 368.700989  |
| 674.695313 | 223.684662 | 579.210938 | 1224.809814 | 482.460938 | 406.566223  |
| 673.447266 | 228.151062 | 577.947266 | 1149.647827 | 481.179688 | 401.480804  |
| 672.199219 | 227.468124 | 576.681641 | 904.952332  | 479.896484 | 414.571869  |
| 670.949219 | 224.855331 | 575.416016 | 675.263000  | 478.615234 | 402.280823  |
| 669.701172 | 227.711060 | 574.152344 | 563.732422  | 477.332031 | 440.427002  |
| 668.451172 | 239.248184 | 572.886719 | 449.066925  | 476.050781 | 445.048157  |
| 667.203125 | 227.632278 | 571.619141 | 407.421783  | 474.767578 | 444.970612  |
| 665.953125 | 229.200180 | 570.353516 | 394.343719  | 473.484375 | 483.402466  |
| 664.703125 | 226.267899 | 569.087891 | 380.953003  | 472.201172 | 481.440033  |
| 663.453125 | 225.264694 | 567.820313 | 354.246948  | 470.917969 | 491.058350  |
| 662.203125 | 221.370209 | 566.554688 | 338.648193  | 469.634766 | 499.421631  |
| 660.953125 | 232.575180 | 565.287109 | 338.589386  | 468.351563 | 509.346313  |
| 659.703125 | 228.038391 | 564.019531 | 329.338287  | 467.066406 | 546.482117  |
| 658.451172 | 231.852432 | 562.751953 | 324.844177  | 465.783203 | 543.259277  |
| 657.201172 | 232.133377 | 561.484375 | 320.351624  | 464.498047 | 568.180786  |
| 655.949219 | 225.993927 | 560.216797 | 303.188171  | 463.212891 | 614.978943  |
| 654.697266 | 245.854233 | 558.949219 | 323.724670  | 461.927734 | 637.065857  |
| 653.445313 | 242.923553 | 557.681641 | 320.818115  | 460.642578 | 680.710266  |
| 652.193359 | 239.673019 | 556.412109 | 308.096527  | 459.357422 | 749.963196  |
| 650.941406 | 237.385986 | 555.144531 | 309.625977  | 458.072266 | 807.632019  |
| 649.689453 | 250.495087 | 553.875000 | 315.586334  | 456.785156 | 888.084106  |
| 648.437500 | 244.038101 | 552.605469 | 310.467834  | 455.500000 | 952.579712  |
| 647.183594 | 262.592102 | 551.335938 | 336.993652  | 454.212891 | 1055.149292 |
| 645.931641 | 240.427322 | 550.066406 | 328.076691  | 452.927734 | 1110.539063 |
| 644.677734 | 262.180664 | 548.796875 | 344.784424  | 451.640625 | 1211.172363 |
| 643.423828 | 256.367004 | 547.527344 | 361.486359  | 450.353516 | 1280.560181 |
| 642.171875 | 261.769470 | 546.255859 | 339.605316  | 449.066406 | 1358.348999 |
| 640.917969 | 277.421173 | 544.986328 | 328.797150  | 447.779297 | 1387.751587 |
| 639.664063 | 270.326691 | 543.714844 | 285.434814  | 446.492188 | 1407.473633 |
| 638.408203 | 274.763184 | 542.445313 | 281.592712  | 445.203125 | 1417.520386 |
| 637.154297 | 302.251190 | 541.173828 | 248.681198  | 443.916016 | 1402.616943 |
| 635.900391 | 316.924622 | 539.902344 | 250.533554  | 442.626953 | 1332.534180 |
| 634.644531 | 353.037689 | 538.630859 | 264.704437  | 441.337891 | 1352.563721 |
| 633.388672 | 375.377594 | 537.359375 | 246.024948  | 440.048828 | 1309.629150 |
| 632.134766 | 414.987549 | 536.085938 | 245.982178  | 438.759766 | 1329.343872 |
| 630.878906 | 432.190460 | 534.814453 | 233.310944  | 437.470703 | 1377.403564 |
| 629.623047 | 436.593445 | 533.541016 | 229.482483  | 436.181641 | 1441.956177 |
| 628.367188 | 446.431396 | 532.269531 | 225.339767  | 434.892578 | 1585.283325 |
| 627.111328 | 451.469849 | 530.996094 | 218.358536  | 433.601563 | 1713.924561 |
| 625.853516 | 445.637360 | 529.722656 | 217.374084  | 432.312500 | 1797.065063 |
| 624.597656 | 462.500366 | 528.449219 | 214.181915  | 431.021484 | 1868.036255 |
| 623.339844 | 463.698486 | 527.175781 | 212.252365  | 429.732422 | 1842.189087 |
| 622.083984 | 466.174255 | 525.902344 | 215.053406  | 428.441406 | 1705.571167 |
| 620.826172 | 483.983276 | 524.628906 | 222.582535  | 427.150391 | 1508.331543 |
| 619.568359 | 512.326477 | 523.353516 | 216.869904  | 425.859375 | 1361.865234 |
| 618.310547 | 560.778931 | 522.080078 | 225.026413  | 424.566406 | 1184.348389 |
| 617.052734 | 623.263489 | 520.804688 | 219.945541  | 423.275391 | 1010.625061 |
| 615.794922 | 675.510742 | 519.529297 | 214.236313  | 421.982422 | 941.116272  |

|            |             |            |             |            |             |
|------------|-------------|------------|-------------|------------|-------------|
| 420.691406 | 883.755005  | 321.824219 | 5218.376953 | 221.630859 | 603.845947  |
| 419.398438 | 835.737671  | 320.513672 | 4596.715820 | 220.304688 | 602.226563  |
| 418.105469 | 807.313965  | 319.205078 | 3818.885742 | 218.976563 | 624.511047  |
| 416.812500 | 820.221985  | 317.894531 | 3020.174316 | 217.648438 | 638.317017  |
| 415.519531 | 819.146790  | 316.583984 | 2382.058594 | 216.320313 | 669.963745  |
| 414.226563 | 826.147156  | 315.273438 | 1939.699585 | 214.992188 | 717.627136  |
| 412.933594 | 877.860901  | 313.962891 | 1624.355347 | 213.664063 | 747.434509  |
| 411.640625 | 914.653870  | 312.652344 | 1372.846680 | 212.335938 | 850.994263  |
| 410.345703 | 993.030029  | 311.339844 | 1216.384277 | 211.005859 | 908.574951  |
| 409.052734 | 1062.378296 | 310.029297 | 1059.976807 | 209.677734 | 1050.751465 |
| 407.757813 | 1119.289795 | 308.716797 | 996.099365  | 208.347656 | 1214.330444 |
| 406.462891 | 1199.760864 | 307.404297 | 912.037964  | 207.017578 | 1421.957520 |
| 405.167969 | 1278.032349 | 306.093750 | 854.330872  | 205.689453 | 1581.788940 |
| 403.873047 | 1325.881958 | 304.781250 | 781.953613  | 204.359375 | 1608.689331 |
| 402.578125 | 1326.580566 | 303.468750 | 766.822754  | 203.027344 | 1512.692749 |
| 401.281250 | 1282.013062 | 302.154297 | 724.468384  | 201.697266 | 1288.430298 |
| 399.986328 | 1230.641479 | 300.841797 | 692.528992  | 200.367188 | 1049.457275 |
| 398.689453 | 1147.364868 | 299.529297 | 657.848267  | 199.035156 | 886.313782  |
| 397.394531 | 1157.080444 | 298.214844 | 669.658325  | 197.705078 | 768.184387  |
| 396.097656 | 1271.822388 | 296.900391 | 640.191101  | 196.373047 | 739.390564  |
| 394.800781 | 1460.868652 | 295.587891 | 657.502136  | 195.041016 | 757.055664  |
| 393.503906 | 1790.149536 | 294.273438 | 643.939514  | 193.708984 | 793.411438  |
| 392.207031 | 2068.531006 | 292.958984 | 662.160461  | 192.376953 | 853.272095  |
| 390.910156 | 2162.908936 | 291.644531 | 701.455322  | 191.044922 | 904.369385  |
| 389.611328 | 1934.081177 | 290.328125 | 681.171936  | 189.712891 | 864.123413  |
| 388.314453 | 1538.823730 | 289.013672 | 694.184814  | 188.378906 | 847.698242  |
| 387.015625 | 1170.007080 | 287.697266 | 671.772339  | 187.046875 | 784.879089  |
| 385.718750 | 886.092163  | 286.382813 | 698.215332  | 185.712891 | 698.283752  |
| 384.419922 | 722.917358  | 285.066406 | 660.242554  | 184.378906 | 634.007080  |
| 383.121094 | 643.305603  | 283.750000 | 650.360535  | 183.044922 | 605.287231  |
| 381.822266 | 582.275269  | 282.433594 | 620.648132  | 181.710938 | 578.685120  |
| 380.523438 | 526.831421  | 281.117188 | 615.352783  | 180.376953 | 588.216125  |
| 379.222656 | 500.773254  | 279.800781 | 594.502747  | 179.042969 | 570.655701  |
| 377.923828 | 481.523621  | 278.484375 | 579.454529  | 177.707031 | 580.786621  |
| 376.623047 | 460.735626  | 277.166016 | 578.438049  | 176.373047 | 571.658081  |
| 375.324219 | 476.102905  | 275.849609 | 593.579895  | 175.037109 | 578.776978  |
| 374.023438 | 441.422485  | 274.531250 | 607.497192  | 173.701172 | 547.696045  |
| 372.722656 | 446.286865  | 273.212891 | 581.485779  | 172.367188 | 549.403748  |
| 371.421875 | 443.429626  | 271.894531 | 606.065063  | 171.031250 | 544.195679  |
| 370.121094 | 435.324768  | 270.576172 | 616.012207  | 169.693359 | 536.584534  |
| 368.820313 | 436.174652  | 269.257813 | 631.743286  | 168.357422 | 525.970520  |
| 367.517578 | 424.061676  | 267.939453 | 640.768799  | 167.021484 | 503.039673  |
| 366.216797 | 429.850464  | 266.619141 | 627.867432  | 165.683594 | 504.453217  |
| 364.914063 | 439.648041  | 265.300781 | 590.310974  | 164.347656 | 512.474976  |
| 363.613281 | 436.177917  | 263.980469 | 584.119507  | 163.009766 | 493.463013  |
| 362.310547 | 431.475342  | 262.660156 | 531.367126  | 161.671875 | 498.180603  |
| 361.007813 | 453.601959  | 261.341797 | 490.195892  | 160.333984 | 533.820923  |
| 359.705078 | 463.696777  | 260.021484 | 474.898438  | 158.996094 | 549.936707  |
| 358.402344 | 462.074341  | 258.701172 | 453.218658  | 157.658203 | 606.864563  |
| 357.099609 | 468.465668  | 257.378906 | 448.273102  | 156.320313 | 673.674927  |
| 355.794922 | 498.582092  | 256.058594 | 430.862549  | 154.980469 | 711.659241  |
| 354.492188 | 503.424316  | 254.736328 | 421.666412  | 153.642578 | 716.033264  |
| 353.187500 | 520.894409  | 253.416016 | 445.301208  | 152.302734 | 700.911011  |
| 351.882813 | 538.666382  | 252.093750 | 423.341675  | 150.962891 | 713.681641  |
| 350.578125 | 547.502075  | 250.771484 | 455.779541  | 149.623047 | 785.510925  |
| 349.273438 | 596.050842  | 249.449219 | 456.307037  | 148.283203 | 967.626648  |
| 347.968750 | 593.176086  | 248.126953 | 467.769196  | 146.943359 | 1314.217529 |
| 346.664063 | 671.861267  | 246.804688 | 464.953735  | 145.603516 | 1868.646362 |
| 345.359375 | 724.670715  | 245.482422 | 443.617249  | 144.261719 | 2505.569580 |
| 344.052734 | 767.308777  | 244.158203 | 469.040466  | 142.921875 | 2809.468994 |
| 342.748047 | 844.076416  | 242.835938 | 471.689819  | 141.580078 | 2565.183594 |
| 341.441406 | 914.666016  | 241.511719 | 484.959991  | 140.238281 | 2029.625854 |
| 340.134766 | 1037.813477 | 240.189453 | 502.169983  | 138.896484 | 1431.684448 |
| 338.828125 | 1196.888916 | 238.865234 | 495.104126  | 137.554688 | 1066.539429 |
| 337.521484 | 1380.192627 | 237.541016 | 529.292175  | 136.212891 | 813.156311  |
| 336.214844 | 1601.849365 | 236.216797 | 529.502319  | 134.871094 | 682.248535  |
| 334.908203 | 1934.665527 | 234.890625 | 550.330933  | 133.527344 | 620.796387  |
| 333.601563 | 2251.081787 | 233.566406 | 548.415161  | 132.185547 | 565.348450  |
| 332.292969 | 2677.049316 | 232.240234 | 530.132385  | 130.841797 | 542.519043  |
| 330.986328 | 3128.973145 | 230.916016 | 541.555115  | 129.498047 | 507.437866  |
| 329.677734 | 3557.401123 | 229.589844 | 524.794922  | 128.156250 | 493.894714  |
| 328.369141 | 4006.555664 | 228.263672 | 536.517456  | 126.812500 | 495.003143  |
| 327.060547 | 4444.195313 | 226.937500 | 543.086731  | 125.466797 | 500.295258  |
| 325.751953 | 4863.573730 | 225.611328 | 540.265625  | 124.123047 | 507.378326  |
| 324.443359 | 5309.194336 | 224.285156 | 564.696289  | 122.779297 | 535.969360  |
| 323.132813 | 5473.936523 | 222.958984 | 565.807861  | 121.433594 | 560.667114  |

|            |             |         |     |         |     |
|------------|-------------|---------|-----|---------|-----|
| 120.089844 | 621.194214  | 21.1453 | 983 | 22.6459 | 821 |
| 118.744141 | 714.844421  | 21.1650 | 864 | 22.6657 | 838 |
| 117.398438 | 986.991699  | 21.1847 | 942 | 22.6854 | 784 |
| 116.052734 | 1434.855103 | 21.2045 | 943 | 22.7052 | 840 |
| 114.707031 | 2247.254150 | 21.2242 | 900 | 22.7249 | 850 |
| 113.361328 | 3378.938721 | 21.2440 | 933 | 22.7447 | 827 |
| 112.015625 | 4384.326172 | 21.2637 | 897 | 22.7644 | 859 |
| 110.667969 | 4568.784668 | 21.2835 | 932 | 22.7841 | 899 |
| 109.322266 | 3630.642822 | 21.3032 | 901 | 22.8039 | 805 |
| 107.974609 | 2248.847412 | 21.3230 | 879 | 22.8236 | 927 |
| 106.626953 | 1313.235596 | 21.3427 | 889 | 22.8434 | 860 |
| 105.279297 | 808.667053  | 21.3625 | 891 | 22.8631 | 888 |
| 103.931641 | 616.600220  | 21.3822 | 903 | 22.8829 | 838 |
| 102.583984 | 507.137817  | 21.4019 | 918 | 22.9026 | 926 |
|            |             | 21.4217 | 847 | 22.9224 | 827 |
|            |             | 21.4414 | 892 | 22.9421 | 885 |
|            |             | 21.4612 | 809 | 22.9619 | 883 |
|            |             | 21.4809 | 927 | 22.9816 | 891 |
|            |             | 21.5007 | 858 | 23.0013 | 871 |
|            |             | 21.5204 | 867 | 23.0211 | 820 |
|            |             | 21.5402 | 879 | 23.0408 | 836 |
|            |             | 21.5599 | 884 | 23.0606 | 873 |
|            |             | 21.5797 | 865 | 23.0803 | 846 |
|            |             | 21.5994 | 895 | 23.1001 | 799 |
|            |             | 21.6191 | 931 | 23.1198 | 816 |
|            |             | 21.6389 | 866 | 23.1396 | 827 |
|            |             | 21.6586 | 857 | 23.1593 | 825 |
|            |             | 21.6784 | 930 | 23.1791 | 833 |
|            |             | 21.6981 | 865 | 23.1988 | 857 |
|            |             | 21.7179 | 832 | 23.2185 | 813 |
|            |             | 21.7376 | 910 | 23.2383 | 860 |
|            |             | 21.7574 | 856 | 23.2580 | 818 |
|            |             | 21.7771 | 919 | 23.2778 | 835 |
|            |             | 21.7969 | 899 | 23.2975 | 848 |
|            |             | 21.8166 | 957 | 23.3173 | 827 |
|            |             | 21.8364 | 923 | 23.3370 | 840 |
|            |             | 21.8561 | 890 | 23.3568 | 812 |
|            |             | 21.8758 | 912 | 23.3765 | 822 |
|            |             | 21.8956 | 876 | 23.3963 | 793 |
|            |             | 21.9153 | 885 | 23.4160 | 781 |
|            |             | 21.9351 | 885 | 23.4358 | 805 |
|            |             | 21.9548 | 923 | 23.4555 | 836 |
|            |             | 21.9746 | 867 | 23.4752 | 789 |
|            |             | 21.9943 | 842 | 23.4950 | 825 |
|            |             | 22.0141 | 884 | 23.5147 | 817 |
|            |             | 22.0338 | 850 | 23.5345 | 817 |
|            |             | 22.0536 | 837 | 23.5542 | 817 |
|            |             | 22.0733 | 864 | 23.5740 | 839 |
|            |             | 22.0930 | 857 | 23.5937 | 799 |
|            |             | 22.1128 | 907 | 23.6135 | 824 |
|            |             | 22.1325 | 900 | 23.6332 | 862 |
|            |             | 22.1523 | 848 | 23.6530 | 813 |
|            |             | 22.1720 | 864 | 23.6727 | 811 |
|            |             | 22.1918 | 854 | 23.6924 | 806 |
|            |             | 22.2115 | 901 | 23.7122 | 787 |
|            |             | 22.2313 | 801 | 23.7319 | 846 |
|            |             | 22.2510 | 869 | 23.7517 | 812 |
|            |             | 22.2708 | 908 | 23.7714 | 859 |
|            |             | 22.2905 | 854 | 23.7912 | 765 |
|            |             | 22.3102 | 875 | 23.8109 | 800 |
|            |             | 22.3300 | 968 | 23.8307 | 831 |
|            |             | 22.3497 | 879 | 23.8504 | 790 |
|            |             | 22.3695 | 857 | 23.8702 | 794 |
|            |             | 22.3892 | 882 | 23.8899 | 817 |
|            |             | 22.4090 | 885 | 23.9096 | 783 |
|            |             | 22.4287 | 817 | 23.9294 | 807 |
|            |             | 22.4485 | 842 | 23.9491 | 796 |
|            |             | 22.4682 | 855 | 23.9689 | 824 |
|            |             | 22.4880 | 879 | 23.9886 | 812 |
|            |             | 22.5077 | 861 | 24.0084 | 798 |
|            |             | 22.5274 | 883 | 24.0281 | 783 |
|            |             | 22.5472 | 858 | 24.0479 | 763 |
|            |             | 22.5669 | 866 | 24.0676 | 757 |
|            |             | 22.5867 | 816 | 24.0874 | 825 |
|            |             | 22.6064 | 851 | 24.1071 | 822 |
|            |             | 22.6262 | 879 | 24.1269 | 830 |

## XRD Spectrum

2theta (°) Intensity (A.U.)

|         |      |
|---------|------|
| 20.0000 | 915  |
| 20.0197 | 1013 |
| 20.0395 | 983  |
| 20.0592 | 997  |
| 20.0790 | 933  |
| 20.0987 | 981  |
| 20.1185 | 898  |
| 20.1382 | 944  |
| 20.1580 | 934  |
| 20.1777 | 1011 |
| 20.1975 | 965  |
| 20.2172 | 964  |
| 20.2369 | 1022 |
| 20.2567 | 1002 |
| 20.2764 | 945  |
| 20.2962 | 983  |
| 20.3159 | 962  |
| 20.3357 | 941  |
| 20.3554 | 976  |
| 20.3752 | 915  |
| 20.3949 | 978  |
| 20.4147 | 991  |
| 20.4344 | 940  |
| 20.4542 | 950  |
| 20.4739 | 923  |
| 20.4936 | 940  |
| 20.5134 | 954  |
| 20.5331 | 874  |
| 20.5529 | 991  |
| 20.5726 | 935  |
| 20.5924 | 858  |
| 20.6121 | 954  |
| 20.6319 | 957  |
| 20.6516 | 909  |
| 20.6714 | 956  |
| 20.6911 | 979  |
| 20.7108 | 919  |
| 20.7306 | 989  |
| 20.7503 | 982  |
| 20.7701 | 885  |
| 20.7898 | 923  |
| 20.8096 | 869  |
| 20.8293 | 890  |
| 20.8491 | 938  |
| 20.8688 | 823  |
| 20.8886 | 921  |
| 20.9083 | 956  |
| 20.9280 | 911  |
| 20.9478 | 882  |
| 20.9675 | 995  |
| 20.9873 | 898  |
| 21.0070 | 928  |
| 21.0268 | 912  |
| 21.0465 | 907  |
| 21.0663 | 899  |
| 21.0860 | 893  |
| 21.1058 | 933  |
| 21.1255 | 903  |

|         |     |         |      |         |     |
|---------|-----|---------|------|---------|-----|
| 24.1466 | 759 | 25.6473 | 738  | 27.1479 | 716 |
| 24.1663 | 835 | 25.6670 | 801  | 27.1677 | 674 |
| 24.1861 | 839 | 25.6868 | 771  | 27.1874 | 696 |
| 24.2058 | 792 | 25.7065 | 743  | 27.2072 | 735 |
| 24.2256 | 856 | 25.7263 | 777  | 27.2269 | 725 |
| 24.2453 | 784 | 25.7460 | 784  | 27.2467 | 694 |
| 24.2651 | 823 | 25.7657 | 811  | 27.2664 | 690 |
| 24.2848 | 821 | 25.7855 | 789  | 27.2862 | 670 |
| 24.3046 | 833 | 25.8052 | 822  | 27.3059 | 684 |
| 24.3243 | 854 | 25.8250 | 827  | 27.3257 | 685 |
| 24.3441 | 793 | 25.8447 | 857  | 27.3454 | 698 |
| 24.3638 | 790 | 25.8645 | 860  | 27.3651 | 703 |
| 24.3835 | 796 | 25.8842 | 885  | 27.3849 | 682 |
| 24.4033 | 846 | 25.9040 | 917  | 27.4046 | 707 |
| 24.4230 | 778 | 25.9237 | 996  | 27.4244 | 713 |
| 24.4428 | 847 | 25.9435 | 1072 | 27.4441 | 716 |
| 24.4625 | 755 | 25.9632 | 1047 | 27.4639 | 673 |
| 24.4823 | 781 | 25.9829 | 1038 | 27.4836 | 688 |
| 24.5020 | 830 | 26.0027 | 999  | 27.5034 | 717 |
| 24.5218 | 767 | 26.0224 | 932  | 27.5231 | 700 |
| 24.5415 | 781 | 26.0422 | 871  | 27.5429 | 678 |
| 24.5613 | 767 | 26.0619 | 851  | 27.5626 | 720 |
| 24.5810 | 809 | 26.0817 | 835  | 27.5823 | 726 |
| 24.6007 | 823 | 26.1014 | 832  | 27.6021 | 664 |
| 24.6205 | 780 | 26.1212 | 765  | 27.6218 | 705 |
| 24.6402 | 792 | 26.1409 | 754  | 27.6416 | 696 |
| 24.6600 | 820 | 26.1607 | 756  | 27.6613 | 716 |
| 24.6797 | 785 | 26.1804 | 730  | 27.6811 | 706 |
| 24.6995 | 760 | 26.2001 | 742  | 27.7008 | 719 |
| 24.7192 | 799 | 26.2199 | 741  | 27.7206 | 708 |
| 24.7390 | 810 | 26.2396 | 749  | 27.7403 | 691 |
| 24.7587 | 806 | 26.2594 | 764  | 27.7601 | 672 |
| 24.7785 | 819 | 26.2791 | 766  | 27.7798 | 672 |
| 24.7982 | 800 | 26.2989 | 736  | 27.7996 | 649 |
| 24.8180 | 822 | 26.3186 | 733  | 27.8193 | 669 |
| 24.8377 | 780 | 26.3384 | 736  | 27.8390 | 684 |
| 24.8574 | 762 | 26.3581 | 694  | 27.8588 | 688 |
| 24.8772 | 775 | 26.3779 | 743  | 27.8785 | 658 |
| 24.8969 | 811 | 26.3976 | 727  | 27.8983 | 707 |
| 24.9167 | 785 | 26.4174 | 733  | 27.9180 | 710 |
| 24.9364 | 802 | 26.4371 | 739  | 27.9378 | 678 |
| 24.9562 | 769 | 26.4568 | 777  | 27.9575 | 661 |
| 24.9759 | 791 | 26.4766 | 772  | 27.9773 | 663 |
| 24.9957 | 792 | 26.4963 | 729  | 27.9970 | 657 |
| 25.0154 | 759 | 26.5161 | 788  | 28.0168 | 659 |
| 25.0352 | 816 | 26.5358 | 788  | 28.0365 | 674 |
| 25.0549 | 799 | 26.5556 | 742  | 28.0562 | 693 |
| 25.0746 | 761 | 26.5753 | 721  | 28.0760 | 697 |
| 25.0944 | 778 | 26.5951 | 707  | 28.0957 | 651 |
| 25.1141 | 759 | 26.6148 | 721  | 28.1155 | 716 |
| 25.1339 | 773 | 26.6346 | 741  | 28.1352 | 670 |
| 25.1536 | 790 | 26.6543 | 701  | 28.1550 | 698 |
| 25.1734 | 744 | 26.6740 | 732  | 28.1747 | 710 |
| 25.1931 | 793 | 26.6938 | 750  | 28.1945 | 765 |
| 25.2129 | 805 | 26.7135 | 775  | 28.2142 | 742 |
| 25.2326 | 843 | 26.7333 | 705  | 28.2340 | 744 |
| 25.2524 | 800 | 26.7530 | 712  | 28.2537 | 750 |
| 25.2721 | 778 | 26.7728 | 715  | 28.2734 | 757 |
| 25.2918 | 821 | 26.7925 | 698  | 28.2932 | 735 |
| 25.3116 | 795 | 26.8123 | 704  | 28.3129 | 681 |
| 25.3313 | 882 | 26.8320 | 715  | 28.3327 | 675 |
| 25.3511 | 868 | 26.8518 | 772  | 28.3524 | 677 |
| 25.3708 | 846 | 26.8715 | 713  | 28.3722 | 642 |
| 25.3906 | 916 | 26.8912 | 681  | 28.3919 | 661 |
| 25.4103 | 775 | 26.9110 | 735  | 28.4117 | 689 |
| 25.4301 | 861 | 26.9307 | 636  | 28.4314 | 666 |
| 25.4498 | 786 | 26.9505 | 682  | 28.4512 | 693 |
| 25.4696 | 787 | 26.9702 | 734  | 28.4709 | 674 |
| 25.4893 | 788 | 26.9900 | 702  | 28.4907 | 614 |
| 25.5091 | 772 | 27.0097 | 708  | 28.5104 | 668 |
| 25.5288 | 775 | 27.0295 | 812  | 28.5301 | 625 |
| 25.5485 | 733 | 27.0492 | 727  | 28.5499 | 658 |
| 25.5683 | 797 | 27.0690 | 723  | 28.5696 | 643 |
| 25.5880 | 811 | 27.0887 | 712  | 28.5894 | 641 |
| 25.6078 | 788 | 27.1085 | 733  | 28.6091 | 669 |
| 25.6275 | 758 | 27.1282 | 709  | 28.6289 | 668 |

|         |     |         |     |         |      |
|---------|-----|---------|-----|---------|------|
| 28.6486 | 681 | 30.1493 | 576 | 31.6500 | 766  |
| 28.6684 | 633 | 30.1690 | 572 | 31.6697 | 741  |
| 28.6881 | 645 | 30.1888 | 588 | 31.6895 | 805  |
| 28.7079 | 605 | 30.2085 | 601 | 31.7092 | 861  |
| 28.7276 | 650 | 30.2283 | 589 | 31.7289 | 832  |
| 28.7473 | 662 | 30.2480 | 543 | 31.7487 | 880  |
| 28.7671 | 644 | 30.2678 | 525 | 31.7684 | 1042 |
| 28.7868 | 640 | 30.2875 | 521 | 31.7882 | 1125 |
| 28.8066 | 594 | 30.3073 | 588 | 31.8079 | 1310 |
| 28.8263 | 625 | 30.3270 | 518 | 31.8277 | 1399 |
| 28.8461 | 640 | 30.3467 | 509 | 31.8474 | 1514 |
| 28.8658 | 647 | 30.3665 | 553 | 31.8672 | 1562 |
| 28.8856 | 651 | 30.3862 | 567 | 31.8869 | 1463 |
| 28.9053 | 642 | 30.4060 | 538 | 31.9067 | 1300 |
| 28.9251 | 684 | 30.4257 | 568 | 31.9264 | 1210 |
| 28.9448 | 746 | 30.4455 | 582 | 31.9461 | 1024 |
| 28.9645 | 746 | 30.4652 | 551 | 31.9659 | 850  |
| 28.9843 | 748 | 30.4850 | 531 | 31.9856 | 784  |
| 29.0040 | 747 | 30.5047 | 566 | 32.0054 | 778  |
| 29.0238 | 746 | 30.5245 | 548 | 32.0251 | 643  |
| 29.0435 | 766 | 30.5442 | 532 | 32.0449 | 635  |
| 29.0633 | 745 | 30.5639 | 585 | 32.0646 | 591  |
| 29.0830 | 678 | 30.5837 | 567 | 32.0844 | 550  |
| 29.1028 | 705 | 30.6034 | 539 | 32.1041 | 577  |
| 29.1225 | 675 | 30.6232 | 569 | 32.1239 | 584  |
| 29.1423 | 656 | 30.6429 | 578 | 32.1436 | 592  |
| 29.1620 | 650 | 30.6627 | 554 | 32.1634 | 631  |
| 29.1818 | 623 | 30.6824 | 570 | 32.1831 | 663  |
| 29.2015 | 653 | 30.7022 | 565 | 32.2028 | 801  |
| 29.2212 | 612 | 30.7219 | 486 | 32.2226 | 882  |
| 29.2410 | 606 | 30.7417 | 529 | 32.2423 | 962  |
| 29.2607 | 636 | 30.7614 | 539 | 32.2621 | 1050 |
| 29.2805 | 612 | 30.7812 | 524 | 32.2818 | 1042 |
| 29.3002 | 608 | 30.8009 | 508 | 32.3016 | 1045 |
| 29.3200 | 578 | 30.8206 | 538 | 32.3213 | 917  |
| 29.3397 | 601 | 30.8404 | 565 | 32.3411 | 864  |
| 29.3595 | 591 | 30.8601 | 519 | 32.3608 | 835  |
| 29.3792 | 582 | 30.8799 | 582 | 32.3806 | 772  |
| 29.3990 | 553 | 30.8996 | 529 | 32.4003 | 725  |
| 29.4187 | 628 | 30.9194 | 537 | 32.4200 | 685  |
| 29.4384 | 587 | 30.9391 | 517 | 32.4398 | 640  |
| 29.4582 | 589 | 30.9589 | 504 | 32.4595 | 567  |
| 29.4779 | 593 | 30.9786 | 551 | 32.4793 | 550  |
| 29.4977 | 592 | 30.9984 | 527 | 32.4990 | 486  |
| 29.5174 | 617 | 31.0181 | 549 | 32.5188 | 502  |
| 29.5372 | 629 | 31.0378 | 537 | 32.5385 | 505  |
| 29.5569 | 576 | 31.0576 | 503 | 32.5583 | 490  |
| 29.5767 | 560 | 31.0773 | 571 | 32.5780 | 476  |
| 29.5964 | 604 | 31.0971 | 524 | 32.5978 | 483  |
| 29.6162 | 607 | 31.1168 | 529 | 32.6175 | 481  |
| 29.6359 | 612 | 31.1366 | 589 | 32.6372 | 506  |
| 29.6556 | 617 | 31.1563 | 564 | 32.6570 | 551  |
| 29.6754 | 568 | 31.1761 | 614 | 32.6767 | 501  |
| 29.6951 | 558 | 31.1958 | 634 | 32.6965 | 510  |
| 29.7149 | 562 | 31.2156 | 656 | 32.7162 | 490  |
| 29.7346 | 566 | 31.2353 | 681 | 32.7360 | 506  |
| 29.7544 | 597 | 31.2550 | 732 | 32.7557 | 478  |
| 29.7741 | 558 | 31.2748 | 707 | 32.7755 | 580  |
| 29.7939 | 620 | 31.2945 | 717 | 32.7952 | 567  |
| 29.8136 | 590 | 31.3143 | 694 | 32.8150 | 564  |
| 29.8334 | 554 | 31.3340 | 645 | 32.8347 | 598  |
| 29.8531 | 556 | 31.3538 | 574 | 32.8545 | 594  |
| 29.8729 | 549 | 31.3735 | 569 | 32.8742 | 671  |
| 29.8926 | 561 | 31.3933 | 551 | 32.8939 | 732  |
| 29.9123 | 562 | 31.4130 | 570 | 32.9137 | 799  |
| 29.9321 | 556 | 31.4328 | 519 | 32.9334 | 915  |
| 29.9518 | 598 | 31.4525 | 534 | 32.9532 | 998  |
| 29.9716 | 570 | 31.4723 | 531 | 32.9729 | 1205 |
| 29.9913 | 543 | 31.4920 | 566 | 32.9927 | 1167 |
| 30.0111 | 568 | 31.5117 | 613 | 33.0124 | 1164 |
| 30.0308 | 596 | 31.5315 | 590 | 33.0322 | 1036 |
| 30.0506 | 563 | 31.5512 | 624 | 33.0519 | 895  |
| 30.0703 | 572 | 31.5710 | 572 | 33.0717 | 790  |
| 30.0901 | 592 | 31.5907 | 599 | 33.0914 | 707  |
| 30.1098 | 573 | 31.6105 | 677 | 33.1111 | 610  |
| 30.1295 | 558 | 31.6302 | 698 | 33.1309 | 569  |



|         |     |         |     |         |     |
|---------|-----|---------|-----|---------|-----|
| 33.1506 | 541 | 34.6513 | 380 | 36.1520 | 343 |
| 33.1704 | 470 | 34.6711 | 347 | 36.1717 | 338 |
| 33.1901 | 452 | 34.6908 | 395 | 36.1915 | 300 |
| 33.2099 | 482 | 34.7105 | 361 | 36.2112 | 304 |
| 33.2296 | 423 | 34.7303 | 336 | 36.2310 | 329 |
| 33.2494 | 425 | 34.7500 | 366 | 36.2507 | 294 |
| 33.2691 | 436 | 34.7698 | 352 | 36.2705 | 314 |
| 33.2889 | 441 | 34.7895 | 379 | 36.2902 | 300 |
| 33.3086 | 405 | 34.8093 | 358 | 36.3099 | 333 |
| 33.3283 | 422 | 34.8290 | 368 | 36.3297 | 312 |
| 33.3481 | 418 | 34.8488 | 376 | 36.3494 | 307 |
| 33.3678 | 423 | 34.8685 | 345 | 36.3692 | 314 |
| 33.3876 | 421 | 34.8883 | 392 | 36.3889 | 311 |
| 33.4073 | 449 | 34.9080 | 344 | 36.4087 | 308 |
| 33.4271 | 428 | 34.9277 | 355 | 36.4284 | 295 |
| 33.4468 | 412 | 34.9475 | 404 | 36.4482 | 329 |
| 33.4666 | 444 | 34.9672 | 353 | 36.4679 | 333 |
| 33.4863 | 432 | 34.9870 | 381 | 36.4877 | 337 |
| 33.5061 | 482 | 35.0067 | 380 | 36.5074 | 339 |
| 33.5258 | 442 | 35.0265 | 354 | 36.5272 | 315 |
| 33.5456 | 467 | 35.0462 | 364 | 36.5469 | 336 |
| 33.5653 | 475 | 35.0660 | 365 | 36.5666 | 307 |
| 33.5850 | 450 | 35.0857 | 351 | 36.5864 | 322 |
| 33.6048 | 442 | 35.1055 | 350 | 36.6061 | 328 |
| 33.6245 | 424 | 35.1252 | 382 | 36.6259 | 303 |
| 33.6443 | 445 | 35.1450 | 345 | 36.6456 | 297 |
| 33.6640 | 449 | 35.1647 | 346 | 36.6654 | 299 |
| 33.6838 | 445 | 35.1844 | 351 | 36.6851 | 292 |
| 33.7035 | 415 | 35.2042 | 341 | 36.7049 | 289 |
| 33.7233 | 428 | 35.2239 | 360 | 36.7246 | 297 |
| 33.7430 | 432 | 35.2437 | 339 | 36.7444 | 307 |
| 33.7628 | 394 | 35.2634 | 328 | 36.7641 | 314 |
| 33.7825 | 386 | 35.2832 | 342 | 36.7838 | 308 |
| 33.8022 | 406 | 35.3029 | 334 | 36.8036 | 294 |
| 33.8220 | 413 | 35.3227 | 334 | 36.8233 | 308 |
| 33.8417 | 441 | 35.3424 | 364 | 36.8431 | 303 |
| 33.8615 | 423 | 35.3622 | 364 | 36.8628 | 302 |
| 33.8812 | 401 | 35.3819 | 371 | 36.8826 | 290 |
| 33.9010 | 399 | 35.4016 | 367 | 36.9023 | 294 |
| 33.9207 | 415 | 35.4214 | 378 | 36.9221 | 275 |
| 33.9405 | 411 | 35.4411 | 358 | 36.9418 | 313 |
| 33.9602 | 419 | 35.4609 | 361 | 36.9616 | 330 |
| 33.9800 | 409 | 35.4806 | 351 | 36.9813 | 295 |
| 33.9997 | 453 | 35.5004 | 391 | 37.0010 | 271 |
| 34.0194 | 442 | 35.5201 | 396 | 37.0208 | 313 |
| 34.0392 | 466 | 35.5399 | 404 | 37.0405 | 286 |
| 34.0589 | 483 | 35.5596 | 434 | 37.0603 | 281 |
| 34.0787 | 542 | 35.5794 | 376 | 37.0800 | 328 |
| 34.0984 | 596 | 35.5991 | 336 | 37.0998 | 274 |
| 34.1182 | 637 | 35.6188 | 389 | 37.1195 | 308 |
| 34.1379 | 674 | 35.6386 | 378 | 37.1393 | 267 |
| 34.1577 | 637 | 35.6583 | 365 | 37.1590 | 291 |
| 34.1774 | 646 | 35.6781 | 351 | 37.1788 | 325 |
| 34.1972 | 556 | 35.6978 | 350 | 37.1985 | 301 |
| 34.2169 | 525 | 35.7176 | 366 | 37.2183 | 322 |
| 34.2366 | 494 | 35.7373 | 333 | 37.2380 | 291 |
| 34.2564 | 474 | 35.7571 | 329 | 37.2577 | 276 |
| 34.2761 | 459 | 35.7768 | 318 | 37.2775 | 277 |
| 34.2959 | 430 | 35.7966 | 356 | 37.2972 | 306 |
| 34.3156 | 398 | 35.8163 | 323 | 37.3170 | 315 |
| 34.3354 | 390 | 35.8361 | 330 | 37.3367 | 283 |
| 34.3551 | 413 | 35.8558 | 333 | 37.3565 | 315 |
| 34.3749 | 427 | 35.8755 | 316 | 37.3762 | 247 |
| 34.3946 | 404 | 35.8953 | 344 | 37.3960 | 289 |
| 34.4144 | 367 | 35.9150 | 306 | 37.4157 | 295 |
| 34.4341 | 368 | 35.9348 | 334 | 37.4355 | 280 |
| 34.4539 | 339 | 35.9545 | 338 | 37.4552 | 299 |
| 34.4736 | 375 | 35.9743 | 336 | 37.4749 | 286 |
| 34.4933 | 397 | 35.9940 | 346 | 37.4947 | 287 |
| 34.5131 | 352 | 36.0138 | 339 | 37.5144 | 302 |
| 34.5328 | 385 | 36.0335 | 296 | 37.5342 | 280 |
| 34.5526 | 344 | 36.0533 | 328 | 37.5539 | 294 |
| 34.5723 | 382 | 36.0730 | 311 | 37.5737 | 284 |
| 34.5921 | 391 | 36.0927 | 327 | 37.5934 | 278 |
| 34.6118 | 400 | 36.1125 | 296 | 37.6132 | 289 |
| 34.6316 | 379 | 36.1322 | 341 | 37.6329 | 270 |

|         |     |         |     |         |     |
|---------|-----|---------|-----|---------|-----|
| 37.6527 | 283 | 39.1533 | 265 | 40.6540 | 272 |
| 37.6724 | 278 | 39.1731 | 314 | 40.6737 | 265 |
| 37.6921 | 271 | 39.1928 | 326 | 40.6935 | 248 |
| 37.7119 | 285 | 39.2126 | 353 | 40.7132 | 227 |
| 37.7316 | 289 | 39.2323 | 383 | 40.7330 | 243 |
| 37.7514 | 303 | 39.2521 | 391 | 40.7527 | 256 |
| 37.7711 | 294 | 39.2718 | 379 | 40.7725 | 235 |
| 37.7909 | 283 | 39.2915 | 401 | 40.7922 | 256 |
| 37.8106 | 301 | 39.3113 | 388 | 40.8120 | 250 |
| 37.8304 | 297 | 39.3310 | 368 | 40.8317 | 270 |
| 37.8501 | 295 | 39.3508 | 358 | 40.8515 | 271 |
| 37.8699 | 267 | 39.3705 | 320 | 40.8712 | 256 |
| 37.8896 | 311 | 39.3903 | 300 | 40.8910 | 239 |
| 37.9093 | 289 | 39.4100 | 328 | 40.9107 | 270 |
| 37.9291 | 273 | 39.4298 | 304 | 40.9304 | 270 |
| 37.9488 | 288 | 39.4495 | 271 | 40.9502 | 285 |
| 37.9686 | 301 | 39.4693 | 290 | 40.9699 | 273 |
| 37.9883 | 283 | 39.4890 | 269 | 40.9897 | 246 |
| 38.0081 | 292 | 39.5088 | 287 | 41.0094 | 265 |
| 38.0278 | 280 | 39.5285 | 254 | 41.0292 | 276 |
| 38.0476 | 252 | 39.5482 | 305 | 41.0489 | 238 |
| 38.0673 | 271 | 39.5680 | 292 | 41.0687 | 239 |
| 38.0871 | 301 | 39.5877 | 286 | 41.0884 | 269 |
| 38.1068 | 264 | 39.6075 | 303 | 41.1082 | 256 |
| 38.1266 | 304 | 39.6272 | 294 | 41.1279 | 269 |
| 38.1463 | 272 | 39.6470 | 291 | 41.1476 | 240 |
| 38.1660 | 284 | 39.6667 | 325 | 41.1674 | 233 |
| 38.1858 | 266 | 39.6865 | 294 | 41.1871 | 230 |
| 38.2055 | 251 | 39.7062 | 326 | 41.2069 | 241 |
| 38.2253 | 278 | 39.7260 | 332 | 41.2266 | 247 |
| 38.2450 | 267 | 39.7457 | 358 | 41.2464 | 249 |
| 38.2648 | 274 | 39.7654 | 374 | 41.2661 | 246 |
| 38.2845 | 292 | 39.7852 | 382 | 41.2859 | 263 |
| 38.3043 | 261 | 39.8049 | 477 | 41.3056 | 241 |
| 38.3240 | 292 | 39.8247 | 530 | 41.3254 | 235 |
| 38.3438 | 266 | 39.8444 | 553 | 41.3451 | 263 |
| 38.3635 | 294 | 39.8642 | 551 | 41.3648 | 249 |
| 38.3832 | 243 | 39.8839 | 595 | 41.3846 | 257 |
| 38.4030 | 271 | 39.9037 | 573 | 41.4043 | 276 |
| 38.4227 | 292 | 39.9234 | 533 | 41.4241 | 263 |
| 38.4425 | 310 | 39.9432 | 496 | 41.4438 | 246 |
| 38.4622 | 298 | 39.9629 | 409 | 41.4636 | 264 |
| 38.4820 | 304 | 39.9826 | 382 | 41.4833 | 242 |
| 38.5017 | 263 | 40.0024 | 340 | 41.5031 | 277 |
| 38.5215 | 266 | 40.0221 | 302 | 41.5228 | 285 |
| 38.5412 | 292 | 40.0419 | 303 | 41.5426 | 265 |
| 38.5610 | 255 | 40.0616 | 314 | 41.5623 | 220 |
| 38.5807 | 287 | 40.0814 | 293 | 41.5821 | 231 |
| 38.6004 | 281 | 40.1011 | 281 | 41.6018 | 239 |
| 38.6202 | 231 | 40.1209 | 278 | 41.6215 | 256 |
| 38.6399 | 292 | 40.1406 | 267 | 41.6413 | 255 |
| 38.6597 | 274 | 40.1604 | 266 | 41.6610 | 236 |
| 38.6794 | 289 | 40.1801 | 245 | 41.6808 | 255 |
| 38.6992 | 256 | 40.1999 | 230 | 41.7005 | 289 |
| 38.7189 | 283 | 40.2196 | 265 | 41.7203 | 227 |
| 38.7387 | 283 | 40.2393 | 243 | 41.7400 | 267 |
| 38.7584 | 281 | 40.2591 | 260 | 41.7598 | 270 |
| 38.7782 | 269 | 40.2788 | 291 | 41.7795 | 278 |
| 38.7979 | 271 | 40.2986 | 261 | 41.7993 | 264 |
| 38.8177 | 282 | 40.3183 | 255 | 41.8190 | 275 |
| 38.8374 | 271 | 40.3381 | 263 | 41.8387 | 257 |
| 38.8571 | 236 | 40.3578 | 301 | 41.8585 | 265 |
| 38.8769 | 288 | 40.3776 | 248 | 41.8782 | 270 |
| 38.8966 | 273 | 40.3973 | 284 | 41.8980 | 268 |
| 38.9164 | 289 | 40.4171 | 299 | 41.9177 | 267 |
| 38.9361 | 297 | 40.4368 | 258 | 41.9375 | 248 |
| 38.9559 | 248 | 40.4565 | 285 | 41.9572 | 279 |
| 38.9756 | 293 | 40.4763 | 276 | 41.9770 | 317 |
| 38.9954 | 255 | 40.4960 | 262 | 41.9967 | 312 |
| 39.0151 | 295 | 40.5158 | 268 | 42.0165 | 334 |
| 39.0349 | 267 | 40.5355 | 283 | 42.0362 | 318 |
| 39.0546 | 256 | 40.5553 | 291 | 42.0559 | 330 |
| 39.0743 | 275 | 40.5750 | 293 | 42.0757 | 359 |
| 39.0941 | 293 | 40.5948 | 272 | 42.0954 | 331 |
| 39.1138 | 296 | 40.6145 | 270 | 42.1152 | 308 |
| 39.1336 | 307 | 40.6343 | 241 | 42.1349 | 296 |

|         |     |         |     |         |     |
|---------|-----|---------|-----|---------|-----|
| 42.1547 | 272 | 43.6553 | 247 | 45.1560 | 240 |
| 42.1744 | 292 | 43.6751 | 255 | 45.1758 | 225 |
| 42.1942 | 288 | 43.6948 | 239 | 45.1955 | 254 |
| 42.2139 | 240 | 43.7146 | 244 | 45.2153 | 235 |
| 42.2337 | 278 | 43.7343 | 242 | 45.2350 | 219 |
| 42.2534 | 238 | 43.7541 | 252 | 45.2548 | 229 |
| 42.2731 | 241 | 43.7738 | 235 | 45.2745 | 224 |
| 42.2929 | 248 | 43.7936 | 252 | 45.2942 | 227 |
| 42.3126 | 240 | 43.8133 | 290 | 45.3140 | 222 |
| 42.3324 | 265 | 43.8331 | 244 | 45.3337 | 264 |
| 42.3521 | 260 | 43.8528 | 265 | 45.3535 | 276 |
| 42.3719 | 265 | 43.8726 | 258 | 45.3732 | 269 |
| 42.3916 | 261 | 43.8923 | 287 | 45.3930 | 283 |
| 42.4114 | 268 | 43.9120 | 313 | 45.4127 | 276 |
| 42.4311 | 250 | 43.9318 | 344 | 45.4325 | 304 |
| 42.4509 | 260 | 43.9515 | 306 | 45.4522 | 278 |
| 42.4706 | 229 | 43.9713 | 305 | 45.4720 | 272 |
| 42.4904 | 254 | 43.9910 | 264 | 45.4917 | 234 |
| 42.5101 | 273 | 44.0108 | 273 | 45.5114 | 242 |
| 42.5298 | 217 | 44.0305 | 260 | 45.5312 | 233 |
| 42.5496 | 261 | 44.0503 | 256 | 45.5509 | 232 |
| 42.5693 | 265 | 44.0700 | 268 | 45.5707 | 238 |
| 42.5891 | 213 | 44.0898 | 242 | 45.5904 | 225 |
| 42.6088 | 261 | 44.1095 | 259 | 45.6102 | 242 |
| 42.6286 | 241 | 44.1292 | 231 | 45.6299 | 232 |
| 42.6483 | 215 | 44.1490 | 242 | 45.6497 | 206 |
| 42.6681 | 243 | 44.1687 | 247 | 45.6694 | 230 |
| 42.6878 | 261 | 44.1885 | 224 | 45.6892 | 212 |
| 42.7076 | 210 | 44.2082 | 209 | 45.7089 | 212 |
| 42.7273 | 230 | 44.2280 | 222 | 45.7286 | 206 |
| 42.7470 | 241 | 44.2477 | 251 | 45.7484 | 213 |
| 42.7668 | 246 | 44.2675 | 257 | 45.7681 | 249 |
| 42.7865 | 228 | 44.2872 | 207 | 45.7879 | 208 |
| 42.8063 | 226 | 44.3070 | 222 | 45.8076 | 215 |
| 42.8260 | 240 | 44.3267 | 211 | 45.8274 | 191 |
| 42.8458 | 218 | 44.3464 | 234 | 45.8471 | 232 |
| 42.8655 | 239 | 44.3662 | 229 | 45.8669 | 211 |
| 42.8853 | 247 | 44.3859 | 226 | 45.8866 | 229 |
| 42.9050 | 236 | 44.4057 | 226 | 45.9064 | 224 |
| 42.9248 | 235 | 44.4254 | 241 | 45.9261 | 221 |
| 42.9445 | 220 | 44.4452 | 234 | 45.9458 | 225 |
| 42.9642 | 237 | 44.4649 | 264 | 45.9656 | 229 |
| 42.9840 | 237 | 44.4847 | 217 | 45.9853 | 240 |
| 43.0037 | 238 | 44.5044 | 234 | 46.0051 | 205 |
| 43.0235 | 207 | 44.5242 | 253 | 46.0248 | 232 |
| 43.0432 | 219 | 44.5439 | 245 | 46.0446 | 210 |
| 43.0630 | 234 | 44.5637 | 235 | 46.0643 | 230 |
| 43.0827 | 215 | 44.5834 | 240 | 46.0841 | 223 |
| 43.1025 | 229 | 44.6031 | 241 | 46.1038 | 259 |
| 43.1222 | 214 | 44.6229 | 232 | 46.1236 | 243 |
| 43.1420 | 237 | 44.6426 | 217 | 46.1433 | 240 |
| 43.1617 | 249 | 44.6624 | 221 | 46.1631 | 258 |
| 43.1815 | 219 | 44.6821 | 228 | 46.1828 | 292 |
| 43.2012 | 244 | 44.7019 | 233 | 46.2025 | 260 |
| 43.2209 | 229 | 44.7216 | 221 | 46.2223 | 282 |
| 43.2407 | 236 | 44.7414 | 200 | 46.2420 | 283 |
| 43.2604 | 229 | 44.7611 | 231 | 46.2618 | 263 |
| 43.2802 | 217 | 44.7809 | 247 | 46.2815 | 255 |
| 43.2999 | 212 | 44.8006 | 237 | 46.3013 | 242 |
| 43.3197 | 212 | 44.8203 | 210 | 46.3210 | 246 |
| 43.3394 | 236 | 44.8401 | 257 | 46.3408 | 258 |
| 43.3592 | 238 | 44.8598 | 196 | 46.3605 | 237 |
| 43.3789 | 244 | 44.8796 | 215 | 46.3803 | 228 |
| 43.3987 | 244 | 44.8993 | 234 | 46.4000 | 242 |
| 43.4184 | 248 | 44.9191 | 242 | 46.4197 | 276 |
| 43.4381 | 259 | 44.9388 | 217 | 46.4395 | 279 |
| 43.4579 | 247 | 44.9586 | 214 | 46.4592 | 221 |
| 43.4776 | 235 | 44.9783 | 236 | 46.4790 | 258 |
| 43.4974 | 229 | 44.9981 | 238 | 46.4987 | 262 |
| 43.5171 | 225 | 45.0178 | 234 | 46.5185 | 283 |
| 43.5369 | 245 | 45.0375 | 255 | 46.5382 | 281 |
| 43.5566 | 238 | 45.0573 | 230 | 46.5580 | 303 |
| 43.5764 | 231 | 45.0770 | 234 | 46.5777 | 299 |
| 43.5961 | 240 | 45.0968 | 231 | 46.5975 | 330 |
| 43.6159 | 229 | 45.1165 | 227 | 46.6172 | 325 |
| 43.6356 | 232 | 45.1363 | 230 | 46.6369 | 347 |

|         |     |         |     |         |     |
|---------|-----|---------|-----|---------|-----|
| 46.6567 | 372 | 48.1574 | 472 | 49.6580 | 429 |
| 46.6764 | 434 | 48.1771 | 468 | 49.6778 | 419 |
| 46.6962 | 476 | 48.1969 | 396 | 49.6975 | 311 |
| 46.7159 | 603 | 48.2166 | 373 | 49.7173 | 269 |
| 46.7357 | 616 | 48.2364 | 330 | 49.7370 | 302 |
| 46.7554 | 733 | 48.2561 | 290 | 49.7568 | 244 |
| 46.7752 | 792 | 48.2758 | 275 | 49.7765 | 232 |
| 46.7949 | 724 | 48.2956 | 239 | 49.7963 | 226 |
| 46.8147 | 632 | 48.3153 | 245 | 49.8160 | 197 |
| 46.8344 | 595 | 48.3351 | 247 | 49.8358 | 219 |
| 46.8542 | 495 | 48.3548 | 236 | 49.8555 | 212 |
| 46.8739 | 421 | 48.3746 | 224 | 49.8752 | 209 |
| 46.8936 | 380 | 48.3943 | 214 | 49.8950 | 233 |
| 46.9134 | 298 | 48.4141 | 230 | 49.9147 | 214 |
| 46.9331 | 301 | 48.4338 | 218 | 49.9345 | 241 |
| 46.9529 | 272 | 48.4536 | 228 | 49.9542 | 219 |
| 46.9726 | 266 | 48.4733 | 218 | 49.9740 | 224 |
| 46.9924 | 224 | 48.4930 | 215 | 49.9937 | 268 |
| 47.0121 | 214 | 48.5128 | 213 | 50.0135 | 257 |
| 47.0319 | 225 | 48.5325 | 259 | 50.0332 | 265 |
| 47.0516 | 224 | 48.5523 | 211 | 50.0530 | 205 |
| 47.0714 | 207 | 48.5720 | 238 | 50.0727 | 216 |
| 47.0911 | 205 | 48.5918 | 228 | 50.0924 | 205 |
| 47.1108 | 206 | 48.6115 | 258 | 50.1122 | 210 |
| 47.1306 | 193 | 48.6313 | 265 | 50.1319 | 230 |
| 47.1503 | 222 | 48.6510 | 261 | 50.1517 | 234 |
| 47.1701 | 245 | 48.6708 | 271 | 50.1714 | 227 |
| 47.1898 | 209 | 48.6905 | 267 | 50.1912 | 209 |
| 47.2096 | 169 | 48.7102 | 290 | 50.2109 | 227 |
| 47.2293 | 181 | 48.7300 | 261 | 50.2307 | 234 |
| 47.2491 | 227 | 48.7497 | 253 | 50.2504 | 227 |
| 47.2688 | 194 | 48.7695 | 252 | 50.2702 | 238 |
| 47.2886 | 186 | 48.7892 | 219 | 50.2899 | 224 |
| 47.3083 | 189 | 48.8090 | 248 | 50.3096 | 253 |
| 47.3280 | 205 | 48.8287 | 231 | 50.3294 | 249 |
| 47.3478 | 199 | 48.8485 | 220 | 50.3491 | 249 |
| 47.3675 | 210 | 48.8682 | 238 | 50.3689 | 268 |
| 47.3873 | 204 | 48.8880 | 230 | 50.3886 | 283 |
| 47.4070 | 247 | 48.9077 | 205 | 50.4084 | 280 |
| 47.4268 | 221 | 48.9275 | 237 | 50.4281 | 320 |
| 47.4465 | 227 | 48.9472 | 250 | 50.4479 | 315 |
| 47.4663 | 187 | 48.9669 | 266 | 50.4676 | 371 |
| 47.4860 | 207 | 48.9867 | 266 | 50.4874 | 390 |
| 47.5058 | 207 | 49.0064 | 281 | 50.5071 | 436 |
| 47.5255 | 244 | 49.0262 | 275 | 50.5269 | 496 |
| 47.5453 | 243 | 49.0459 | 283 | 50.5466 | 531 |
| 47.5650 | 209 | 49.0657 | 228 | 50.5663 | 520 |
| 47.5847 | 248 | 49.0854 | 270 | 50.5861 | 494 |
| 47.6045 | 212 | 49.1052 | 233 | 50.6058 | 496 |
| 47.6242 | 245 | 49.1249 | 209 | 50.6256 | 391 |
| 47.6440 | 248 | 49.1447 | 222 | 50.6453 | 382 |
| 47.6637 | 254 | 49.1644 | 257 | 50.6651 | 321 |
| 47.6835 | 244 | 49.1841 | 224 | 50.6848 | 304 |
| 47.7032 | 218 | 49.2039 | 232 | 50.7046 | 301 |
| 47.7230 | 228 | 49.2236 | 258 | 50.7243 | 266 |
| 47.7427 | 219 | 49.2434 | 282 | 50.7441 | 223 |
| 47.7625 | 208 | 49.2631 | 258 | 50.7638 | 216 |
| 47.7822 | 203 | 49.2829 | 298 | 50.7835 | 216 |
| 47.8019 | 223 | 49.3026 | 299 | 50.8033 | 222 |
| 47.8217 | 209 | 49.3224 | 302 | 50.8230 | 227 |
| 47.8414 | 263 | 49.3421 | 286 | 50.8428 | 238 |
| 47.8612 | 225 | 49.3619 | 309 | 50.8625 | 242 |
| 47.8809 | 219 | 49.3816 | 333 | 50.8823 | 216 |
| 47.9007 | 243 | 49.4013 | 378 | 50.9020 | 199 |
| 47.9204 | 211 | 49.4211 | 415 | 50.9218 | 232 |
| 47.9402 | 256 | 49.4408 | 425 | 50.9415 | 229 |
| 47.9599 | 284 | 49.4606 | 461 | 50.9613 | 178 |
| 47.9797 | 268 | 49.4803 | 529 | 50.9810 | 221 |
| 47.9994 | 259 | 49.5001 | 657 | 51.0007 | 217 |
| 48.0191 | 274 | 49.5198 | 749 | 51.0205 | 219 |
| 48.0389 | 310 | 49.5396 | 854 | 51.0402 | 230 |
| 48.0586 | 311 | 49.5593 | 893 | 51.0600 | 225 |
| 48.0784 | 346 | 49.5791 | 860 | 51.0797 | 248 |
| 48.0981 | 354 | 49.5988 | 768 | 51.0995 | 254 |
| 48.1179 | 433 | 49.6185 | 629 | 51.1192 | 219 |
| 48.1376 | 426 | 49.6383 | 525 | 51.1390 | 247 |

|         |     |         |     |         |     |
|---------|-----|---------|-----|---------|-----|
| 51.1587 | 235 | 52.6594 | 196 | 54.1601 | 191 |
| 51.1785 | 282 | 52.6791 | 232 | 54.1798 | 228 |
| 51.1982 | 261 | 52.6989 | 217 | 54.1996 | 205 |
| 51.2180 | 283 | 52.7186 | 244 | 54.2193 | 229 |
| 51.2377 | 318 | 52.7384 | 252 | 54.2390 | 225 |
| 51.2574 | 302 | 52.7581 | 238 | 54.2588 | 192 |
| 51.2772 | 414 | 52.7779 | 223 | 54.2785 | 209 |
| 51.2969 | 403 | 52.7976 | 234 | 54.2983 | 216 |
| 51.3167 | 439 | 52.8174 | 183 | 54.3180 | 183 |
| 51.3364 | 446 | 52.8371 | 200 | 54.3378 | 185 |
| 51.3562 | 413 | 52.8568 | 191 | 54.3575 | 227 |
| 51.3759 | 451 | 52.8766 | 205 | 54.3773 | 186 |
| 51.3957 | 388 | 52.8963 | 216 | 54.3970 | 236 |
| 51.4154 | 308 | 52.9161 | 229 | 54.4168 | 197 |
| 51.4352 | 338 | 52.9358 | 224 | 54.4365 | 191 |
| 51.4549 | 277 | 52.9556 | 231 | 54.4562 | 202 |
| 51.4746 | 273 | 52.9753 | 222 | 54.4760 | 215 |
| 51.4944 | 229 | 52.9951 | 219 | 54.4957 | 215 |
| 51.5141 | 251 | 53.0148 | 224 | 54.5155 | 216 |
| 51.5339 | 224 | 53.0346 | 223 | 54.5352 | 207 |
| 51.5536 | 227 | 53.0543 | 257 | 54.5550 | 227 |
| 51.5734 | 247 | 53.0740 | 267 | 54.5747 | 211 |
| 51.5931 | 215 | 53.0938 | 262 | 54.5945 | 210 |
| 51.6129 | 228 | 53.1135 | 275 | 54.6142 | 208 |
| 51.6326 | 237 | 53.1333 | 273 | 54.6340 | 223 |
| 51.6524 | 231 | 53.1530 | 331 | 54.6537 | 191 |
| 51.6721 | 210 | 53.1728 | 346 | 54.6734 | 191 |
| 51.6918 | 225 | 53.1925 | 346 | 54.6932 | 195 |
| 51.7116 | 198 | 53.2123 | 393 | 54.7129 | 170 |
| 51.7313 | 205 | 53.2320 | 444 | 54.7327 | 188 |
| 51.7511 | 187 | 53.2518 | 497 | 54.7524 | 173 |
| 51.7708 | 205 | 53.2715 | 526 | 54.7722 | 200 |
| 51.7906 | 206 | 53.2913 | 466 | 54.7919 | 223 |
| 51.8103 | 215 | 53.3110 | 470 | 54.8117 | 220 |
| 51.8301 | 201 | 53.3307 | 388 | 54.8314 | 216 |
| 51.8498 | 204 | 53.3505 | 366 | 54.8512 | 218 |
| 51.8696 | 251 | 53.3702 | 308 | 54.8709 | 216 |
| 51.8893 | 211 | 53.3900 | 314 | 54.8907 | 217 |
| 51.9091 | 210 | 53.4097 | 272 | 54.9104 | 178 |
| 51.9288 | 259 | 53.4295 | 254 | 54.9301 | 195 |
| 51.9485 | 238 | 53.4492 | 237 | 54.9499 | 186 |
| 51.9683 | 234 | 53.4690 | 211 | 54.9696 | 188 |
| 51.9880 | 242 | 53.4887 | 218 | 54.9894 | 192 |
| 52.0078 | 288 | 53.5085 | 187 | 55.0091 | 206 |
| 52.0275 | 276 | 53.5282 | 218 | 55.0289 | 201 |
| 52.0473 | 315 | 53.5479 | 199 | 55.0486 | 185 |
| 52.0670 | 316 | 53.5677 | 201 | 55.0684 | 207 |
| 52.0868 | 335 | 53.5874 | 199 | 55.0881 | 219 |
| 52.1065 | 403 | 53.6072 | 175 | 55.1079 | 199 |
| 52.1263 | 429 | 53.6269 | 194 | 55.1276 | 207 |
| 52.1460 | 491 | 53.6467 | 190 | 55.1473 | 197 |
| 52.1657 | 476 | 53.6664 | 230 | 55.1671 | 196 |
| 52.1855 | 434 | 53.6862 | 196 | 55.1868 | 191 |
| 52.2052 | 449 | 53.7059 | 218 | 55.2066 | 221 |
| 52.2250 | 344 | 53.7257 | 182 | 55.2263 | 202 |
| 52.2447 | 316 | 53.7454 | 223 | 55.2461 | 218 |
| 52.2645 | 281 | 53.7651 | 181 | 55.2658 | 201 |
| 52.2842 | 279 | 53.7849 | 183 | 55.2856 | 210 |
| 52.3040 | 245 | 53.8046 | 193 | 55.3053 | 183 |
| 52.3237 | 241 | 53.8244 | 180 | 55.3251 | 204 |
| 52.3435 | 207 | 53.8441 | 199 | 55.3448 | 209 |
| 52.3632 | 179 | 53.8639 | 192 | 55.3645 | 203 |
| 52.3829 | 224 | 53.8836 | 210 | 55.3843 | 216 |
| 52.4027 | 201 | 53.9034 | 204 | 55.4040 | 199 |
| 52.4224 | 226 | 53.9231 | 181 | 55.4238 | 228 |
| 52.4422 | 200 | 53.9429 | 220 | 55.4435 | 237 |
| 52.4619 | 202 | 53.9626 | 206 | 55.4633 | 220 |
| 52.4817 | 201 | 53.9823 | 207 | 55.4830 | 200 |
| 52.5014 | 181 | 54.0021 | 220 | 55.5028 | 179 |
| 52.5212 | 210 | 54.0218 | 209 | 55.5225 | 204 |
| 52.5409 | 201 | 54.0416 | 189 | 55.5423 | 216 |
| 52.5607 | 205 | 54.0613 | 200 | 55.5620 | 214 |
| 52.5804 | 211 | 54.0811 | 197 | 55.5818 | 212 |
| 52.6002 | 175 | 54.1008 | 175 | 55.6015 | 208 |
| 52.6199 | 266 | 54.1206 | 202 | 55.6212 | 219 |
| 52.6396 | 215 | 54.1403 | 223 | 55.6410 | 217 |

|         |     |         |     |         |     |
|---------|-----|---------|-----|---------|-----|
| 55.6607 | 212 | 57.1614 | 300 | 58.6621 | 221 |
| 55.6805 | 219 | 57.1812 | 305 | 58.6818 | 257 |
| 55.7002 | 221 | 57.2009 | 279 | 58.7016 | 226 |
| 55.7200 | 220 | 57.2206 | 301 | 58.7213 | 231 |
| 55.7397 | 232 | 57.2404 | 282 | 58.7411 | 243 |
| 55.7595 | 261 | 57.2601 | 256 | 58.7608 | 246 |
| 55.7792 | 252 | 57.2799 | 284 | 58.7806 | 242 |
| 55.7990 | 260 | 57.2996 | 243 | 58.8003 | 250 |
| 55.8187 | 262 | 57.3194 | 254 | 58.8200 | 249 |
| 55.8384 | 241 | 57.3391 | 252 | 58.8398 | 238 |
| 55.8582 | 278 | 57.3589 | 214 | 58.8595 | 229 |
| 55.8779 | 249 | 57.3786 | 222 | 58.8793 | 216 |
| 55.8977 | 320 | 57.3984 | 264 | 58.8990 | 238 |
| 55.9174 | 316 | 57.4181 | 268 | 58.9188 | 224 |
| 55.9372 | 364 | 57.4378 | 211 | 58.9385 | 234 |
| 55.9569 | 342 | 57.4576 | 195 | 58.9583 | 225 |
| 55.9767 | 351 | 57.4773 | 217 | 58.9780 | 227 |
| 55.9964 | 314 | 57.4971 | 241 | 58.9978 | 235 |
| 56.0162 | 312 | 57.5168 | 220 | 59.0175 | 231 |
| 56.0359 | 244 | 57.5366 | 228 | 59.0372 | 211 |
| 56.0556 | 249 | 57.5563 | 225 | 59.0570 | 197 |
| 56.0754 | 232 | 57.5761 | 191 | 59.0767 | 237 |
| 56.0951 | 211 | 57.5958 | 216 | 59.0965 | 217 |
| 56.1149 | 248 | 57.6156 | 209 | 59.1162 | 211 |
| 56.1346 | 214 | 57.6353 | 206 | 59.1360 | 225 |
| 56.1544 | 229 | 57.6550 | 215 | 59.1557 | 211 |
| 56.1741 | 216 | 57.6748 | 185 | 59.1755 | 200 |
| 56.1939 | 183 | 57.6945 | 209 | 59.1952 | 203 |
| 56.2136 | 207 | 57.7143 | 227 | 59.2150 | 232 |
| 56.2334 | 210 | 57.7340 | 199 | 59.2347 | 217 |
| 56.2531 | 220 | 57.7538 | 198 | 59.2545 | 198 |
| 56.2729 | 210 | 57.7735 | 205 | 59.2742 | 217 |
| 56.2926 | 223 | 57.7933 | 215 | 59.2939 | 207 |
| 56.3123 | 242 | 57.8130 | 206 | 59.3137 | 212 |
| 56.3321 | 210 | 57.8328 | 203 | 59.3334 | 204 |
| 56.3518 | 198 | 57.8525 | 223 | 59.3532 | 226 |
| 56.3716 | 210 | 57.8723 | 220 | 59.3729 | 223 |
| 56.3913 | 195 | 57.8920 | 197 | 59.3927 | 210 |
| 56.4111 | 210 | 57.9117 | 223 | 59.4124 | 240 |
| 56.4308 | 214 | 57.9315 | 195 | 59.4322 | 248 |
| 56.4506 | 206 | 57.9512 | 207 | 59.4519 | 261 |
| 56.4703 | 212 | 57.9710 | 263 | 59.4717 | 236 |
| 56.4901 | 190 | 57.9907 | 220 | 59.4914 | 248 |
| 56.5098 | 219 | 58.0105 | 242 | 59.5111 | 250 |
| 56.5295 | 211 | 58.0302 | 249 | 59.5309 | 243 |
| 56.5493 | 190 | 58.0500 | 225 | 59.5506 | 223 |
| 56.5690 | 207 | 58.0697 | 286 | 59.5704 | 256 |
| 56.5888 | 224 | 58.0895 | 251 | 59.5901 | 251 |
| 56.6085 | 226 | 58.1092 | 260 | 59.6099 | 227 |
| 56.6283 | 224 | 58.1289 | 253 | 59.6296 | 246 |
| 56.6480 | 198 | 58.1487 | 263 | 59.6494 | 211 |
| 56.6678 | 208 | 58.1684 | 252 | 59.6691 | 187 |
| 56.6875 | 219 | 58.1882 | 240 | 59.6889 | 249 |
| 56.7073 | 250 | 58.2079 | 266 | 59.7086 | 236 |
| 56.7270 | 219 | 58.2277 | 209 | 59.7283 | 248 |
| 56.7467 | 201 | 58.2474 | 237 | 59.7481 | 244 |
| 56.7665 | 201 | 58.2672 | 251 | 59.7678 | 251 |
| 56.7862 | 206 | 58.2869 | 237 | 59.7876 | 256 |
| 56.8060 | 220 | 58.3067 | 208 | 59.8073 | 269 |
| 56.8257 | 213 | 58.3264 | 227 | 59.8271 | 237 |
| 56.8455 | 210 | 58.3461 | 241 | 59.8468 | 264 |
| 56.8652 | 252 | 58.3659 | 238 | 59.8666 | 277 |
| 56.8850 | 212 | 58.3856 | 276 | 59.8863 | 274 |
| 56.9047 | 217 | 58.4054 | 222 | 59.9061 | 282 |
| 56.9245 | 234 | 58.4251 | 236 | 59.9258 | 337 |
| 56.9442 | 242 | 58.4449 | 218 | 59.9456 | 302 |
| 56.9640 | 239 | 58.4646 | 230 | 59.9653 | 326 |
| 56.9837 | 237 | 58.4844 | 211 | 59.9850 | 357 |
| 57.0034 | 228 | 58.5041 | 197 | 60.0048 | 365 |
| 57.0232 | 205 | 58.5239 | 223 | 60.0245 | 349 |
| 57.0429 | 262 | 58.5436 | 236 | 60.0443 | 334 |
| 57.0627 | 235 | 58.5634 | 236 | 60.0640 | 328 |
| 57.0824 | 244 | 58.5831 | 206 | 60.0838 | 311 |
| 57.1022 | 239 | 58.6028 | 227 | 60.1035 | 297 |
| 57.1219 | 260 | 58.6226 | 211 | 60.1233 | 285 |
| 57.1417 | 269 | 58.6423 | 240 | 60.1430 | 255 |

|         |     |         |     |         |     |
|---------|-----|---------|-----|---------|-----|
| 60.1628 | 266 | 61.6634 | 365 | 63.1641 | 304 |
| 60.1825 | 241 | 61.6832 | 381 | 63.1838 | 309 |
| 60.2022 | 234 | 61.7029 | 376 | 63.2036 | 267 |
| 60.2220 | 262 | 61.7227 | 351 | 63.2233 | 305 |
| 60.2417 | 261 | 61.7424 | 350 | 63.2431 | 257 |
| 60.2615 | 267 | 61.7622 | 397 | 63.2628 | 245 |
| 60.2812 | 243 | 61.7819 | 369 | 63.2826 | 239 |
| 60.3010 | 244 | 61.8016 | 374 | 63.3023 | 275 |
| 60.3207 | 275 | 61.8214 | 310 | 63.3221 | 264 |
| 60.3405 | 284 | 61.8411 | 289 | 63.3418 | 267 |
| 60.3602 | 269 | 61.8609 | 260 | 63.3616 | 239 |
| 60.3800 | 246 | 61.8806 | 273 | 63.3813 | 274 |
| 60.3997 | 285 | 61.9004 | 242 | 63.4010 | 249 |
| 60.4194 | 276 | 61.9201 | 265 | 63.4208 | 278 |
| 60.4392 | 297 | 61.9399 | 235 | 63.4405 | 300 |
| 60.4589 | 299 | 61.9596 | 251 | 63.4603 | 270 |
| 60.4787 | 333 | 61.9794 | 265 | 63.4800 | 305 |
| 60.4984 | 331 | 61.9991 | 258 | 63.4998 | 289 |
| 60.5182 | 311 | 62.0188 | 256 | 63.5195 | 298 |
| 60.5379 | 273 | 62.0386 | 241 | 63.5393 | 299 |
| 60.5577 | 297 | 62.0583 | 232 | 63.5590 | 310 |
| 60.5774 | 289 | 62.0781 | 230 | 63.5788 | 289 |
| 60.5972 | 250 | 62.0978 | 233 | 63.5985 | 300 |
| 60.6169 | 259 | 62.1176 | 243 | 63.6183 | 302 |
| 60.6367 | 264 | 62.1373 | 243 | 63.6380 | 303 |
| 60.6564 | 250 | 62.1571 | 240 | 63.6577 | 270 |
| 60.6761 | 259 | 62.1768 | 251 | 63.6775 | 286 |
| 60.6959 | 247 | 62.1966 | 246 | 63.6972 | 264 |
| 60.7156 | 247 | 62.2163 | 253 | 63.7170 | 296 |
| 60.7354 | 198 | 62.2361 | 232 | 63.7367 | 310 |
| 60.7551 | 221 | 62.2558 | 246 | 63.7565 | 313 |
| 60.7749 | 209 | 62.2755 | 219 | 63.7762 | 308 |
| 60.7946 | 251 | 62.2953 | 237 | 63.7960 | 281 |
| 60.8144 | 222 | 62.3150 | 248 | 63.8157 | 270 |
| 60.8341 | 227 | 62.3348 | 268 | 63.8355 | 287 |
| 60.8539 | 277 | 62.3545 | 251 | 63.8552 | 293 |
| 60.8736 | 230 | 62.3743 | 239 | 63.8749 | 328 |
| 60.8933 | 253 | 62.3940 | 275 | 63.8947 | 327 |
| 60.9131 | 238 | 62.4138 | 266 | 63.9144 | 351 |
| 60.9328 | 230 | 62.4335 | 252 | 63.9342 | 332 |
| 60.9526 | 243 | 62.4533 | 281 | 63.9539 | 372 |
| 60.9723 | 255 | 62.4730 | 234 | 63.9737 | 398 |
| 60.9921 | 236 | 62.4927 | 264 | 63.9934 | 402 |
| 61.0118 | 232 | 62.5125 | 260 | 64.0132 | 438 |
| 61.0316 | 247 | 62.5322 | 260 | 64.0329 | 498 |
| 61.0513 | 252 | 62.5520 | 274 | 64.0527 | 497 |
| 61.0711 | 253 | 62.5717 | 272 | 64.0724 | 515 |
| 61.0908 | 249 | 62.5915 | 242 | 64.0921 | 431 |
| 61.1105 | 250 | 62.6112 | 272 | 64.1119 | 449 |
| 61.1303 | 256 | 62.6310 | 265 | 64.1316 | 459 |
| 61.1500 | 250 | 62.6507 | 265 | 64.1514 | 432 |
| 61.1698 | 227 | 62.6705 | 225 | 64.1711 | 439 |
| 61.1895 | 279 | 62.6902 | 281 | 64.1909 | 426 |
| 61.2093 | 266 | 62.7099 | 275 | 64.2106 | 461 |
| 61.2290 | 266 | 62.7297 | 256 | 64.2304 | 449 |
| 61.2488 | 256 | 62.7494 | 275 | 64.2501 | 442 |
| 61.2685 | 246 | 62.7692 | 264 | 64.2699 | 408 |
| 61.2883 | 232 | 62.7889 | 292 | 64.2896 | 394 |
| 61.3080 | 268 | 62.8087 | 281 | 64.3094 | 368 |
| 61.3278 | 248 | 62.8284 | 271 | 64.3291 | 323 |
| 61.3475 | 249 | 62.8482 | 309 | 64.3488 | 324 |
| 61.3672 | 268 | 62.8679 | 282 | 64.3686 | 290 |
| 61.3870 | 232 | 62.8877 | 282 | 64.3883 | 330 |
| 61.4067 | 260 | 62.9074 | 317 | 64.4081 | 282 |
| 61.4265 | 262 | 62.9272 | 324 | 64.4278 | 267 |
| 61.4462 | 258 | 62.9469 | 314 | 64.4476 | 263 |
| 61.4660 | 255 | 62.9666 | 360 | 64.4673 | 283 |
| 61.4857 | 273 | 62.9864 | 397 | 64.4871 | 258 |
| 61.5055 | 267 | 63.0061 | 419 | 64.5068 | 256 |
| 61.5252 | 289 | 63.0259 | 444 | 64.5266 | 262 |
| 61.5450 | 303 | 63.0456 | 450 | 64.5463 | 279 |
| 61.5647 | 302 | 63.0654 | 456 | 64.5660 | 253 |
| 61.5844 | 321 | 63.0851 | 505 | 64.5858 | 301 |
| 61.6042 | 329 | 63.1049 | 456 | 64.6055 | 305 |
| 61.6239 | 331 | 63.1246 | 417 | 64.6253 | 250 |
| 61.6437 | 341 | 63.1444 | 337 | 64.6450 | 267 |

64.6648 275  
 64.6845 265  
 64.7043 266  
 64.7240 275  
 64.7438 267  
 64.7635 271  
 64.7832 292  
 64.8030 273  
 64.8227 278  
 64.8425 292  
 64.8622 289  
 64.8820 334  
 64.9017 299  
 64.9215 327  
 64.9412 371  
 64.9610 345  
 64.9807 360  
 65.0005 391

## Representative <sup>1</sup>H-NMR Spectrum under Continuous reaction conditions

1, 67772, 3911.0197, 9.773786  
 2, 67788, 3910.9578, 9.773632  
 3, 67544, 3910.8959, 9.773477  
 4, 66976, 3910.8339, 9.773322  
 5, 66274, 3910.7720, 9.773167  
 6, 65764, 3910.7101, 9.773013  
 7, 65644, 3910.6482, 9.772858  
 8, 65824, 3910.5862, 9.772703  
 9, 66026, 3910.5243, 9.772548  
 10, 66088, 3910.4624, 9.772394  
 11, 66124, 3910.4005, 9.772239  
 12, 66356, 3910.3385, 9.772084  
 13, 66886, 3910.2766, 9.771929  
 14, 67620, 3910.2147, 9.771775  
 15, 68368, 3910.1528, 9.771620  
 16, 69028, 3910.0908, 9.771465  
 17, 69592, 3910.0289, 9.771310  
 18, 70064, 3909.9670, 9.771156  
 19, 70392, 3909.9050, 9.771001  
 20, 70540, 3909.8431, 9.770846  
 21, 70542, 3909.7812, 9.770691  
 22, 70466, 3909.7193, 9.770537  
 23, 70282, 3909.6573, 9.770382  
 24, 69870, 3909.5954, 9.770227  
 25, 69202, 3909.5335, 9.770072  
 26, 68500, 3909.4716, 9.769917  
 27, 68158, 3909.4096, 9.769763  
 28, 68446, 3909.3477, 9.769608  
 29, 69200, 3909.2858, 9.769453  
 30, 69926, 3909.2238, 9.769298  
 31, 70204, 3909.1619, 9.769144  
 32, 70040, 3909.1000, 9.768989  
 33, 69800, 3909.0381, 9.768834  
 34, 69852, 3908.9761, 9.768679  
 35, 70248, 3908.9142, 9.768525  
 36, 70744, 3908.8523, 9.768370  
 37, 71080, 3908.7904, 9.768215  
 38, 71184, 3908.7284, 9.768060  
 39, 71144, 3908.6665, 9.767906  
 40, 71014, 3908.6046, 9.767751  
 41, 70780, 3908.5427, 9.767596  
 42, 70436, 3908.4807, 9.767441  
 43, 70078, 3908.4188, 9.767287  
 44, 69856, 3908.3569, 9.767132  
 45, 69772, 3908.2949, 9.766977  
 46, 69674, 3908.2330, 9.766822  
 47, 69424, 3908.1711, 9.766668  
 48, 69062, 3908.1092, 9.766513  
 49, 68846, 3908.0472, 9.766358

50, 68974, 3907.9853, 9.766203  
 51, 69418, 3907.9234, 9.766049  
 52, 69930, 3907.8615, 9.765894  
 53, 70318, 3907.7995, 9.765739  
 54, 70576, 3907.7376, 9.765584  
 55, 70840, 3907.6757, 9.765429  
 56, 71140, 3907.6137, 9.765275  
 57, 71356, 3907.5518, 9.765120  
 58, 71342, 3907.4899, 9.764965  
 59, 71138, 3907.4280, 9.764810  
 60, 70966, 3907.3660, 9.764656  
 61, 71052, 3907.3041, 9.764501  
 62, 71420, 3907.2422, 9.764346  
 63, 71932, 3907.1803, 9.764191  
 64, 72432, 3907.1183, 9.764037  
 65, 72876, 3907.0564, 9.763882  
 66, 73292, 3906.9945, 9.763727  
 67, 73670, 3906.9326, 9.763572  
 68, 73958, 3906.8706, 9.763418  
 69, 74128, 3906.8087, 9.763263  
 70, 74260, 3906.7468, 9.763108  
 71, 74440, 3906.6848, 9.762953  
 72, 74654, 3906.6229, 9.762799  
 73, 74766, 3906.5610, 9.762644  
 74, 74680, 3906.4991, 9.762489  
 75, 74466, 3906.4371, 9.762334  
 76, 74294, 3906.3752, 9.762180  
 77, 74288, 3906.3133, 9.762025  
 78, 74366, 3906.2514, 9.761870  
 79, 74364, 3906.1894, 9.761715  
 80, 74236, 3906.1275, 9.761561  
 81, 74096, 3906.0656, 9.761406  
 82, 74078, 3906.0036, 9.761251  
 83, 74144, 3905.9417, 9.761096  
 84, 74156, 3905.8798, 9.760942  
 85, 74054, 3905.8179, 9.760787  
 86, 74006, 3905.7559, 9.760632  
 87, 74266, 3905.6940, 9.760477  
 88, 74868, 3905.6321, 9.760322  
 89, 75522, 3905.5702, 9.760168  
 90, 75860, 3905.5082, 9.760013  
 91, 75762, 3905.4463, 9.759858  
 92, 75492, 3905.3844, 9.759703  
 93, 75428, 3905.3225, 9.759549  
 94, 75676, 3905.2605, 9.759394  
 95, 76008, 3905.1986, 9.759239  
 96, 76110, 3905.1367, 9.759084  
 97, 75894, 3905.0747, 9.758930  
 98, 75562, 3905.0128, 9.758775  
 99, 75350, 3904.9509, 9.758620  
 100, 75298, 3904.8890, 9.758465  
 101, 75270, 3904.8270, 9.758311  
 102, 75164, 3904.7651, 9.758156  
 103, 75088, 3904.7032, 9.758001  
 104, 75234, 3904.6413, 9.757846  
 105, 75686, 3904.5793, 9.757692  
 106, 76288, 3904.5174, 9.757537  
 107, 76782, 3904.4555, 9.757382  
 108, 77004, 3904.3935, 9.757227  
 109, 76970, 3904.3316, 9.757073  
 110, 76820, 3904.2697, 9.756918  
 111, 76688, 3904.2078, 9.756763  
 112, 76636, 3904.1458, 9.756608  
 113, 76688, 3904.0839, 9.756454  
 114, 76840, 3904.0220, 9.756299  
 115, 77046, 3903.9601, 9.756144  
 116, 77238, 3903.8981, 9.755989  
 117, 77396, 3903.8362, 9.755835  
 118, 77554, 3903.7743, 9.755680  
 119, 77764, 3903.7124, 9.755525  
 120, 78012, 3903.6504, 9.755370  
 121, 78180, 3903.5885, 9.755215  
 122, 78192, 3903.5266, 9.755061  
 123, 78124, 3903.4646, 9.754906  
 124, 78168, 3903.4027, 9.754751  
 125, 78446, 3903.3408, 9.754596

126, 78866, 3903.2789, 9.754442  
 127, 79172, 3903.2169, 9.754287  
 128, 79232, 3903.1550, 9.754132  
 129, 79154, 3903.0931, 9.753977  
 130, 79194, 3903.0312, 9.753823  
 131, 79466, 3902.9692, 9.753668  
 132, 79832, 3902.9073, 9.753513  
 133, 80064, 3902.8454, 9.753358  
 134, 80102, 3902.7835, 9.753204  
 135, 80120, 3902.7215, 9.753049  
 136, 80272, 3902.6596, 9.752894  
 137, 80466, 3902.5977, 9.752739  
 138, 80422, 3902.5357, 9.752585  
 139, 79980, 3902.4738, 9.752430  
 140, 79308, 3902.4119, 9.752275  
 141, 78794, 3902.3500, 9.752120  
 142, 78672, 3902.2880, 9.751966  
 143, 78854, 3902.2261, 9.751811  
 144, 79070, 3902.1642, 9.751656  
 145, 79210, 3902.1023, 9.751501  
 146, 79410, 3902.0403, 9.751347  
 147, 79852, 3901.9784, 9.751192  
 148, 80472, 3901.9165, 9.751037  
 149, 80992, 3901.8545, 9.750882  
 150, 81192, 3901.7926, 9.750728  
 151, 81168, 3901.7307, 9.750573  
 152, 81210, 3901.6688, 9.750418  
 153, 81492, 3901.6068, 9.750263  
 154, 81870, 3901.5449, 9.750108  
 155, 82054, 3901.4830, 9.749954  
 156, 81926, 3901.4211, 9.749799  
 157, 81640, 3901.3591, 9.749644  
 158, 81430, 3901.2972, 9.749489  
 159, 81326, 3901.2353, 9.749335  
 160, 81182, 3901.1734, 9.749180  
 161, 80904, 3901.1114, 9.749025  
 162, 80630, 3901.0495, 9.748870  
 163, 80610, 3900.9876, 9.748716  
 164, 80880, 3900.9256, 9.748561  
 165, 81180, 3900.8637, 9.748406  
 166, 81214, 3900.8018, 9.748251  
 167, 80968, 3900.7399, 9.748097  
 168, 80754, 3900.6779, 9.747942  
 169, 80892, 3900.6160, 9.747787  
 170, 81356, 3900.5541, 9.747632  
 171, 81780, 3900.4922, 9.747478  
 172, 81812, 3900.4302, 9.747323  
 173, 81488, 3900.3683, 9.747168  
 174, 81170, 3900.3064, 9.747013  
 175, 81208, 3900.2444, 9.746859  
 176, 81662, 3900.1825, 9.746704  
 177, 82330, 3900.1206, 9.746549  
 178, 83000, 3900.0587, 9.746394  
 179, 83644, 3899.9967, 9.746240  
 180, 84334, 3899.9348, 9.746085  
 181, 85058, 3899.8729, 9.745930  
 182, 85686, 3899.8110, 9.745775  
 183, 86066, 3899.7490, 9.745621  
 184, 86188, 3899.6871, 9.745466  
 185, 86150, 3899.6252, 9.745311  
 186, 86060, 3899.5633, 9.745156  
 187, 85954, 3899.5013, 9.745001  
 188, 85846, 3899.4394, 9.744847  
 189, 85774, 3899.3775, 9.744692  
 190, 85760, 3899.3155, 9.744537  
 191, 85722, 3899.2536, 9.744382  
 192, 85494, 3899.1917, 9.744228  
 193, 85010, 3899.1298, 9.744073  
 194, 84456, 3899.0678, 9.743918  
 195, 84204, 3899.0059, 9.743763  
 196, 84550, 3898.9440, 9.743609  
 197, 85404, 3898.8821, 9.743454  
 198, 86372, 3898.8201, 9.743299  
 199, 87050, 3898.7582, 9.743144  
 200, 87302, 3898.6963, 9.742990  
 201, 87298, 3898.6343, 9.742835





430, 104954, 3884.4531, 9.707395  
431, 105046, 3884.3912, 9.707241  
432, 104960, 3884.3292, 9.707086  
433, 104858, 3884.2673, 9.706931  
434, 104944, 3884.2054, 9.706776  
435, 105204, 3884.1435, 9.706622  
436, 105434, 3884.0815, 9.706467  
437, 105456, 3884.0196, 9.706312  
438, 105340, 3883.9577, 9.706157  
439, 105340, 3883.8957, 9.706003  
440, 105602, 3883.8338, 9.705848  
441, 105992, 3883.7719, 9.705693  
442, 106220, 3883.7100, 9.705538  
443, 106128, 3883.6480, 9.705384  
444, 105800, 3883.5861, 9.705229  
445, 105444, 3883.5242, 9.705074  
446, 105182, 3883.4623, 9.704919  
447, 105036, 3883.4003, 9.704764  
448, 105034, 3883.3384, 9.704610  
449, 105282, 3883.2765, 9.704455  
450, 105816, 3883.2145, 9.704300  
451, 106460, 3883.1526, 9.704145  
452, 106898, 3883.0907, 9.703991  
453, 106968, 3883.0288, 9.703836  
454, 106854, 3882.9668, 9.703681  
455, 106924, 3882.9049, 9.703526  
456, 107340, 3882.8430, 9.703372  
457, 107850, 3882.7811, 9.703217  
458, 108018, 3882.7191, 9.703062  
459, 107648, 3882.6572, 9.702907  
460, 107006, 3882.5953, 9.702753  
461, 106528, 3882.5334, 9.702598  
462, 106420, 3882.4714, 9.702443  
463, 106504, 3882.4095, 9.702288  
464, 106490, 3882.3476, 9.702134  
465, 106326, 3882.2856, 9.701979  
466, 106216, 3882.2237, 9.701824  
467, 106372, 3882.1618, 9.701669  
468, 106708, 3882.0999, 9.701515  
469, 106966, 3882.0379, 9.701360  
470, 106970, 3881.9760, 9.701205  
471, 106828, 3881.9141, 9.701050  
472, 106794, 3881.8522, 9.700896  
473, 106966, 3881.7902, 9.700741  
474, 107230, 3881.7283, 9.700586  
475, 107436, 3881.6664, 9.700431  
476, 107552, 3881.6044, 9.700277  
477, 107658, 3881.5425, 9.700122  
478, 107724, 3881.4806, 9.699967  
479, 107572, 3881.4187, 9.699812  
480, 107082, 3881.3567, 9.699657  
481, 106410, 3881.2948, 9.699503  
482, 105956, 3881.2329, 9.699348  
483, 106052, 3881.1710, 9.699193  
484, 106684, 3881.1090, 9.699038  
485, 107540, 3881.0471, 9.698884  
486, 108362, 3880.9852, 9.698729  
487, 109142, 3880.9233, 9.698574  
488, 109996, 3880.8613, 9.698419  
489, 110874, 3880.7994, 9.698265  
490, 111472, 3880.7375, 9.698110  
491, 111516, 3880.6755, 9.697955  
492, 111066, 3880.6136, 9.697800  
493, 110512, 3880.5517, 9.697646  
494, 110222, 3880.4898, 9.697491  
495, 110202, 3880.4278, 9.697336  
496, 110170, 3880.3659, 9.697181  
497, 109914, 3880.3040, 9.697027  
498, 109536, 3880.2421, 9.696872  
499, 109362, 3880.1801, 9.696717  
500, 109566, 3880.1182, 9.696562  
501, 110008, 3880.0563, 9.696408  
502, 110378, 3879.9943, 9.696253  
503, 110542, 3879.9324, 9.696098  
504, 110610, 3879.8705, 9.695943  
505, 110796, 3879.8086, 9.695789  
506, 111146, 3879.7466, 9.695634  
507, 111530, 3879.6847, 9.695479  
508, 111766, 3879.6228, 9.695324  
509, 111798, 3879.5609, 9.695170  
510, 111628, 3879.4989, 9.695015  
511, 111246, 3879.4370, 9.694860  
512, 110644, 3879.3751, 9.694705  
513, 109952, 3879.3132, 9.694550  
514, 109476, 3879.2512, 9.694396  
515, 109488, 3879.1893, 9.694241  
516, 109954, 3879.1274, 9.694086  
517, 110494, 3879.0654, 9.693931  
518, 110660, 3879.0035, 9.693777  
519, 110322, 3878.9416, 9.693622  
520, 109750, 3878.8797, 9.693467  
521, 109356, 3878.8177, 9.693312  
522, 109366, 3878.7558, 9.693158  
523, 109736, 3878.6939, 9.693003  
524, 110334, 3878.6320, 9.692848  
525, 111086, 3878.5700, 9.692693  
526, 111950, 3878.5081, 9.692539  
527, 112734, 3878.4462, 9.692384  
528, 113110, 3878.3842, 9.692229  
529, 112850, 3878.3223, 9.692074  
530, 112086, 3878.2604, 9.691920  
531, 111288, 3878.1985, 9.691765  
532, 110888, 3878.1365, 9.691610  
533, 110952, 3878.0746, 9.691455  
534, 111200, 3878.0127, 9.691301  
535, 111328, 3877.9508, 9.691146  
536, 111300, 3877.8888, 9.690991  
537, 111340, 3877.8269, 9.690836  
538, 111630, 3877.7650, 9.690682  
539, 112102, 3877.7031, 9.690527  
540, 112464, 3877.6411, 9.690372  
541, 112474, 3877.5792, 9.690217  
542, 112110, 3877.5173, 9.690063  
543, 111570, 3877.4553, 9.689908  
544, 111134, 3877.3934, 9.689753  
545, 111018, 3877.3315, 9.689598  
546, 111350, 3877.2696, 9.689443  
547, 112070, 3877.2076, 9.689289  
548, 112950, 3877.1457, 9.689134  
549, 113612, 3877.0838, 9.688979  
550, 113754, 3877.0219, 9.688824  
551, 113344, 3876.9599, 9.688670  
552, 112668, 3876.8980, 9.688515  
553, 112106, 3876.8361, 9.688360  
554, 111874, 3876.7742, 9.688205  
555, 111918, 3876.7122, 9.688051  
556, 112066, 3876.6503, 9.687896  
557, 112228, 3876.5884, 9.687741  
558, 112412, 3876.5264, 9.687586  
559, 112634, 3876.4645, 9.687432  
560, 112788, 3876.4026, 9.687277  
561, 112740, 3876.3407, 9.687122  
562, 112498, 3876.2787, 9.686967  
563, 112246, 3876.2168, 9.686813  
564, 112194, 3876.1549, 9.686658  
565, 112378, 3876.0930, 9.686503  
566, 112584, 3876.0310, 9.686348  
567, 112572, 3875.9691, 9.686194  
568, 112244, 3875.9072, 9.686039  
569, 111742, 3875.8452, 9.685884  
570, 111320, 3875.7833, 9.685729  
571, 111194, 3875.7214, 9.685575  
572, 111476, 3875.6595, 9.685420  
573, 112174, 3875.5975, 9.685265  
574, 113148, 3875.5356, 9.685110  
575, 114110, 3875.4737, 9.684956  
576, 114720, 3875.4118, 9.684801  
577, 114802, 3875.3498, 9.684646  
578, 114522, 3875.2879, 9.684491  
579, 114288, 3875.2260, 9.684336  
580, 114418, 3875.1641, 9.684182  
581, 114854, 3875.1021, 9.684027  
582, 115216, 3875.0402, 9.683872  
583, 115140, 3874.9783, 9.683717  
584, 114606, 3874.9163, 9.683563  
585, 113932, 3874.8544, 9.683408  
586, 113468, 3874.7925, 9.683253  
587, 113330, 3874.7306, 9.683098  
588, 113384, 3874.6686, 9.682944  
589, 113474, 3874.6067, 9.682789  
590, 113594, 3874.5448, 9.682634  
591, 113810, 3874.4829, 9.682479  
592, 114134, 3874.4209, 9.682325  
593, 114476, 3874.3590, 9.682170  
594, 114732, 3874.2971, 9.682015  
595, 114918, 3874.2351, 9.681860  
596, 115104, 3874.1732, 9.681706  
597, 115280, 3874.1113, 9.681551  
598, 115336, 3874.0494, 9.681396  
599, 115206, 3873.9874, 9.681241  
600, 115008, 3873.9255, 9.681087  
601, 114986, 3873.8636, 9.680932  
602, 115272, 3873.8017, 9.680777  
603, 115744, 3873.7397, 9.680622  
604, 116124, 3873.6778, 9.680468  
605, 116280, 3873.6159, 9.680313  
606, 116364, 3873.5540, 9.680158  
607, 116662, 3873.4920, 9.680003  
608, 117294, 3873.4301, 9.679849  
609, 118124, 3873.3682, 9.679694  
610, 118910, 3873.3062, 9.679539  
611, 119516, 3873.2443, 9.679384  
612, 119934, 3873.1824, 9.679229  
613, 120122, 3873.1205, 9.679075  
614, 119896, 3873.0585, 9.678920  
615, 119082, 3872.9966, 9.678765  
616, 117800, 3872.9347, 9.678610  
617, 116488, 3872.8728, 9.678456  
618, 115656, 3872.8108, 9.678301  
619, 115484, 3872.7489, 9.678146  
620, 115724, 3872.6870, 9.677991  
621, 115962, 3872.6250, 9.677837  
622, 115982, 3872.5631, 9.677682  
623, 115894, 3872.5012, 9.677527  
624, 115926, 3872.4393, 9.677372  
625, 116180, 3872.3773, 9.677218  
626, 116556, 3872.3154, 9.677063  
627, 116940, 3872.2535, 9.676908  
628, 117314, 3872.1916, 9.676753  
629, 117722, 3872.1296, 9.676599  
630, 118146, 3872.0677, 9.676444  
631, 118448, 3872.0058, 9.676289  
632, 118520, 3871.9439, 9.676134  
633, 118410, 3871.8819, 9.675980  
634, 118292, 3871.8200, 9.675825  
635, 118282, 3871.7581, 9.675670  
636, 118336, 3871.6961, 9.675515  
637, 118318, 3871.6342, 9.675361  
638, 118108, 3871.5723, 9.675206  
639, 117706, 3871.5104, 9.675051  
640, 117156, 3871.4484, 9.674896  
641, 116494, 3871.3865, 9.674741  
642, 115800, 3871.3246, 9.674587  
643, 115266, 3871.2627, 9.674432  
644, 115116, 3871.2007, 9.674277  
645, 115440, 3871.1388, 9.674122  
646, 116020, 3871.0769, 9.673968  
647, 116476, 3871.0149, 9.673813  
648, 116574, 3870.9530, 9.673658  
649, 116432, 3870.8911, 9.673503  
650, 116396, 3870.8292, 9.673349  
651, 116696, 3870.7672, 9.673194  
652, 117214, 3870.7053, 9.673039  
653, 117590, 3870.6434, 9.672884  
654, 117566, 3870.5815, 9.672730  
655, 117242, 3870.5195, 9.672575  
656, 116938, 3870.4576, 9.672420  
657, 116912, 3870.3957, 9.672265

















2254, 135120, 3771.4984, 9.425117  
2255, 135796, 3771.4365, 9.424963  
2256, 136158, 3771.3746, 9.424808  
2257, 136240, 3771.3126, 9.424653  
2258, 136118, 3771.2507, 9.424498  
2259, 135900, 3771.1888, 9.424344  
2260, 135718, 3771.1268, 9.424189  
2261, 135772, 3771.0649, 9.424034  
2262, 136234, 3771.0030, 9.423879  
2263, 137106, 3770.9411, 9.423725  
2264, 138126, 3770.8791, 9.423570  
2265, 138862, 3770.8172, 9.423415  
2266, 139014, 3770.7553, 9.423260  
2267, 138620, 3770.6934, 9.423106  
2268, 137992, 3770.6314, 9.422951  
2269, 137426, 3770.5695, 9.422796  
2270, 137014, 3770.5076, 9.422641  
2271, 136666, 3770.4457, 9.422486  
2272, 136344, 3770.3837, 9.422332  
2273, 136164, 3770.3218, 9.422177  
2274, 136260, 3770.2599, 9.422022  
2275, 136572, 3770.1979, 9.421867  
2276, 136826, 3770.1360, 9.421713  
2277, 136770, 3770.0741, 9.421558  
2278, 136392, 3770.0122, 9.421403  
2279, 135912, 3769.9502, 9.421248  
2280, 135506, 3769.8883, 9.421094  
2281, 135112, 3769.8264, 9.420939  
2282, 134522, 3769.7645, 9.420784  
2283, 133666, 3769.7025, 9.420629  
2284, 132766, 3769.6406, 9.420475  
2285, 132158, 3769.5787, 9.420320  
2286, 132012, 3769.5168, 9.420165  
2287, 132178, 3769.4548, 9.420010  
2288, 132370, 3769.3929, 9.419856  
2289, 132428, 3769.3310, 9.419701  
2290, 132362, 3769.2690, 9.419546  
2291, 132252, 3769.2071, 9.419391  
2292, 132090, 3769.1452, 9.419237  
2293, 131854, 3769.0833, 9.419082  
2294, 131646, 3769.0213, 9.418927  
2295, 131690, 3768.9594, 9.418772  
2296, 132146, 3768.8975, 9.418618  
2297, 132906, 3768.8356, 9.418463  
2298, 133646, 3768.7736, 9.418308  
2299, 134118, 3768.7117, 9.418153  
2300, 134312, 3768.6498, 9.417999  
2301, 134398, 3768.5878, 9.417844  
2302, 134444, 3768.5259, 9.417689  
2303, 134306, 3768.4640, 9.417534  
2304, 133802, 3768.4021, 9.417379  
2305, 132982, 3768.3401, 9.417225  
2306, 132142, 3768.2782, 9.417070  
2307, 131598, 3768.2163, 9.416915  
2308, 131392, 3768.1544, 9.416760  
2309, 131344, 3768.0924, 9.416606  
2310, 131304, 3768.0305, 9.416451  
2311, 131352, 3767.9686, 9.416296  
2312, 131666, 3767.9067, 9.416141  
2313, 132246, 3767.8447, 9.415987  
2314, 132814, 3767.7828, 9.415832  
2315, 133078, 3767.7209, 9.415677  
2316, 133034, 3767.6589, 9.415522  
2317, 132984, 3767.5970, 9.415368  
2318, 133174, 3767.5351, 9.415213  
2319, 133512, 3767.4732, 9.415058  
2320, 133626, 3767.4112, 9.414903  
2321, 133248, 3767.3493, 9.414749  
2322, 132532, 3767.2874, 9.414594  
2323, 131944, 3767.2255, 9.414439  
2324, 131874, 3767.1635, 9.414284  
2325, 132358, 3767.1016, 9.414130  
2326, 133144, 3767.0397, 9.413975  
2327, 133972, 3766.9777, 9.413820  
2328, 134736, 3766.9158, 9.413665  
2329, 135388, 3766.8539, 9.413511

2330, 135822, 3766.7920, 9.413356  
2331, 135892, 3766.7300, 9.413201  
2332, 135632, 3766.6681, 9.413046  
2333, 135290, 3766.6062, 9.412892  
2334, 135156, 3766.5443, 9.412737  
2335, 135274, 3766.4823, 9.412582  
2336, 135386, 3766.4204, 9.412427  
2337, 135224, 3766.3585, 9.412272  
2338, 134784, 3766.2966, 9.412118  
2339, 134352, 3766.2346, 9.411963  
2340, 134222, 3766.1727, 9.411808  
2341, 134408, 3766.1108, 9.411653  
2342, 134674, 3766.0488, 9.411499  
2343, 134788, 3765.9869, 9.411344  
2344, 134742, 3765.9250, 9.411189  
2345, 134668, 3765.8631, 9.411034  
2346, 134668, 3765.8011, 9.410880  
2347, 134664, 3765.7392, 9.410725  
2348, 134546, 3765.6773, 9.410570  
2349, 134304, 3765.6154, 9.410415  
2350, 134048, 3765.5534, 9.410261  
2351, 133832, 3765.4915, 9.410106  
2352, 133534, 3765.4296, 9.409951  
2353, 132964, 3765.3676, 9.409796  
2354, 132090, 3765.3057, 9.409642  
2355, 131136, 3765.2438, 9.409487  
2356, 130456, 3765.1819, 9.409332  
2357, 130318, 3765.1199, 9.409177  
2358, 130714, 3765.0580, 9.409023  
2359, 131446, 3764.9961, 9.408868  
2360, 132254, 3764.9342, 9.408713  
2361, 132964, 3764.8722, 9.408558  
2362, 133488, 3764.8103, 9.408404  
2363, 133870, 3764.7484, 9.408249  
2364, 134214, 3764.6865, 9.408094  
2365, 134652, 3764.6245, 9.407939  
2366, 135206, 3764.5626, 9.407784  
2367, 135760, 3764.5007, 9.407630  
2368, 136160, 3764.4387, 9.407475  
2369, 136380, 3764.3768, 9.407320  
2370, 136546, 3764.3149, 9.407165  
2371, 136810, 3764.2530, 9.407011  
2372, 137108, 3764.1910, 9.406856  
2373, 137186, 3764.1291, 9.406701  
2374, 136840, 3764.0672, 9.406546  
2375, 136192, 3764.0053, 9.406392  
2376, 135636, 3763.9433, 9.406237  
2377, 135458, 3763.8814, 9.406082  
2378, 135542, 3763.8195, 9.405927  
2379, 135458, 3763.7575, 9.405773  
2380, 134926, 3763.6956, 9.405618  
2381, 134162, 3763.6337, 9.405463  
2382, 133736, 3763.5718, 9.405308  
2383, 134018, 3763.5098, 9.405154  
2384, 134836, 3763.4479, 9.404999  
2385, 135598, 3763.3860, 9.404844  
2386, 135814, 3763.3241, 9.404689  
2387, 135476, 3763.2621, 9.404535  
2388, 134942, 3763.2002, 9.404380  
2389, 134514, 3763.1383, 9.404225  
2390, 134184, 3763.0764, 9.404070  
2391, 133784, 3763.0144, 9.403916  
2392, 133268, 3762.9525, 9.403761  
2393, 132824, 3762.8906, 9.403606  
2394, 132654, 3762.8286, 9.403451  
2395, 132786, 3762.7667, 9.403297  
2396, 133070, 3762.7048, 9.403142  
2397, 133386, 3762.6429, 9.402987  
2398, 133808, 3762.5809, 9.402832  
2399, 134428, 3762.5190, 9.402677  
2400, 135156, 3762.4571, 9.402523  
2401, 135664, 3762.3952, 9.402368  
2402, 135658, 3762.3332, 9.402213  
2403, 135148, 3762.2713, 9.402058  
2404, 134494, 3762.2094, 9.401904  
2405, 134102, 3762.1474, 9.401749

2406, 134158, 3762.0855, 9.401594  
2407, 134582, 3762.0236, 9.401439  
2408, 135164, 3761.9617, 9.401285  
2409, 135754, 3761.8997, 9.401130  
2410, 136260, 3761.8378, 9.400975  
2411, 136594, 3761.7759, 9.400820  
2412, 136680, 3761.7140, 9.400666  
2413, 136556, 3761.6520, 9.400511  
2414, 136384, 3761.5901, 9.400356  
2415, 136336, 3761.5282, 9.400201  
2416, 136440, 3761.4663, 9.400047  
2417, 136566, 3761.4043, 9.399892  
2418, 136606, 3761.3424, 9.399737  
2419, 136622, 3761.2805, 9.399582  
2420, 136812, 3761.2185, 9.399428  
2421, 137290, 3761.1566, 9.399273  
2422, 137968, 3761.0947, 9.399118  
2423, 138614, 3761.0328, 9.398963  
2424, 139038, 3760.9708, 9.398809  
2425, 139186, 3760.9089, 9.398654  
2426, 139088, 3760.8470, 9.398499  
2427, 138760, 3760.7851, 9.398344  
2428, 138264, 3760.7231, 9.398190  
2429, 137790, 3760.6612, 9.398035  
2430, 137606, 3760.5993, 9.397880  
2431, 137808, 3760.5373, 9.397725  
2432, 138126, 3760.4754, 9.397570  
2433, 138058, 3760.4135, 9.397416  
2434, 137308, 3760.3516, 9.397261  
2435, 136096, 3760.2896, 9.397106  
2436, 135044, 3760.2277, 9.396951  
2437, 134698, 3760.1658, 9.396797  
2438, 135062, 3760.1039, 9.396642  
2439, 135704, 3760.0419, 9.396487  
2440, 136140, 3759.9800, 9.396332  
2441, 136176, 3759.9181, 9.396178  
2442, 135922, 3759.8562, 9.396023  
2443, 135522, 3759.7942, 9.395868  
2444, 135016, 3759.7323, 9.395713  
2445, 134464, 3759.6704, 9.395559  
2446, 134090, 3759.6084, 9.395404  
2447, 134184, 3759.5465, 9.395249  
2448, 134800, 3759.4846, 9.395094  
2449, 135604, 3759.4227, 9.394940  
2450, 136126, 3759.3607, 9.394785  
2451, 136166, 3759.2988, 9.394630  
2452, 135962, 3759.2369, 9.394475  
2453, 135916, 3759.1750, 9.394321  
2454, 136180, 3759.1130, 9.394166  
2455, 136550, 3759.0511, 9.394011  
2456, 136728, 3758.9892, 9.393856  
2457, 136670, 3758.9272, 9.393702  
2458, 136564, 3758.8653, 9.393547  
2459, 136568, 3758.8034, 9.393392  
2460, 136580, 3758.7415, 9.393237  
2461, 136376, 3758.6795, 9.393083  
2462, 135960, 3758.6176, 9.392928  
2463, 135614, 3758.5557, 9.392773  
2464, 135630, 3758.4938, 9.392618  
2465, 135946, 3758.4318, 9.392463  
2466, 136156, 3758.3699, 9.392309  
2467, 135906, 3758.3080, 9.392154  
2468, 135290, 3758.2461, 9.391999  
2469, 134794, 3758.1841, 9.391844  
2470, 134854, 3758.1222, 9.391690  
2471, 135450, 3758.0603, 9.391535  
2472, 136178, 3757.9983, 9.391380  
2473, 136634, 3757.9364, 9.391225  
2474, 136750, 3757.8745, 9.391071  
2475, 136722, 3757.8126, 9.390916  
2476, 136718, 3757.7506, 9.390761  
2477, 136706, 3757.6887, 9.390606  
2478, 136580, 3757.6268, 9.390452  
2479, 136352, 3757.5649, 9.390297  
2480, 136188, 3757.5029, 9.390142  
2481, 136254, 3757.4410, 9.389987















3850, 138258, 3672.6631, 9.178124  
3851, 138338, 3672.6011, 9.177969  
3852, 138646, 3672.5392, 9.177815  
3853, 138926, 3672.4773, 9.177660  
3854, 139060, 3672.4154, 9.177505  
3855, 139074, 3672.3534, 9.177350  
3856, 139030, 3672.2915, 9.177196  
3857, 138948, 3672.2296, 9.177041  
3858, 138868, 3672.1677, 9.176886  
3859, 138924, 3672.1057, 9.176731  
3860, 139236, 3672.0438, 9.176577  
3861, 139700, 3671.9819, 9.176422  
3862, 140006, 3671.9199, 9.176267  
3863, 139904, 3671.8580, 9.176112  
3864, 139504, 3671.7961, 9.175957  
3865, 139234, 3671.7342, 9.175803  
3866, 139476, 3671.6722, 9.175648  
3867, 140142, 3671.6103, 9.175493  
3868, 140754, 3671.5484, 9.175338  
3869, 140906, 3671.4865, 9.175184  
3870, 140620, 3671.4245, 9.175029  
3871, 140312, 3671.3626, 9.174874  
3872, 140284, 3671.3007, 9.174719  
3873, 140430, 3671.2388, 9.174565  
3874, 140362, 3671.1768, 9.174410  
3875, 139850, 3671.1149, 9.174255  
3876, 139098, 3671.0530, 9.174100  
3877, 138530, 3670.9910, 9.173946  
3878, 138432, 3670.9291, 9.173791  
3879, 138742, 3670.8672, 9.173636  
3880, 139212, 3670.8053, 9.173481  
3881, 139658, 3670.7433, 9.173327  
3882, 140040, 3670.6814, 9.173172  
3883, 140276, 3670.6195, 9.173017  
3884, 140222, 3670.5576, 9.172862  
3885, 139792, 3670.4956, 9.172708  
3886, 139162, 3670.4337, 9.172553  
3887, 138734, 3670.3718, 9.172398  
3888, 138830, 3670.3098, 9.172243  
3889, 139402, 3670.2479, 9.172089  
3890, 140090, 3670.1860, 9.171934  
3891, 140542, 3670.1241, 9.171779  
3892, 140700, 3670.0621, 9.171624  
3893, 140736, 3670.0002, 9.171470  
3894, 140806, 3669.9383, 9.171315  
3895, 140876, 3669.8764, 9.171160  
3896, 140852, 3669.8144, 9.171005  
3897, 140702, 3669.7525, 9.170850  
3898, 140486, 3669.6906, 9.170696  
3899, 140214, 3669.6287, 9.170541  
3900, 139794, 3669.5667, 9.170386  
3901, 139202, 3669.5048, 9.170231  
3902, 138674, 3669.4429, 9.170077  
3903, 138626, 3669.3809, 9.169922  
3904, 139300, 3669.3190, 9.169767  
3905, 140462, 3669.2571, 9.169612  
3906, 141540, 3669.1952, 9.169458  
3907, 142096, 3669.1332, 9.169303  
3908, 142158, 3669.0713, 9.169148  
3909, 142118, 3669.0094, 9.168993  
3910, 142242, 3668.9475, 9.168839  
3911, 142410, 3668.8855, 9.168684  
3912, 142260, 3668.8236, 9.168529  
3913, 141664, 3668.7617, 9.168374  
3914, 140912, 3668.6997, 9.168220  
3915, 140438, 3668.6378, 9.168065  
3916, 140374, 3668.5759, 9.167910  
3917, 140448, 3668.5140, 9.167755  
3918, 140278, 3668.4520, 9.167601  
3919, 139798, 3668.3901, 9.167446  
3920, 139326, 3668.3282, 9.167291  
3921, 139238, 3668.2663, 9.167136  
3922, 139600, 3668.2043, 9.166982  
3923, 140174, 3668.1424, 9.166827  
3924, 140634, 3668.0805, 9.166672  
3925, 140866, 3668.0186, 9.166517

3926, 140946, 3667.9566, 9.166363  
3927, 140964, 3667.8947, 9.166208  
3928, 140928, 3667.8328, 9.166053  
3929, 140842, 3667.7708, 9.165898  
3930, 140802, 3667.7089, 9.165743  
3931, 140986, 3667.6470, 9.165589  
3932, 141478, 3667.5851, 9.165434  
3933, 142176, 3667.5231, 9.165279  
3934, 142808, 3667.4612, 9.165124  
3935, 143130, 3667.3993, 9.164970  
3936, 143024, 3667.3374, 9.164815  
3937, 142564, 3667.2754, 9.164660  
3938, 141972, 3667.2135, 9.164505  
3939, 141546, 3667.1516, 9.164351  
3940, 141522, 3667.0896, 9.164196  
3941, 141872, 3667.0277, 9.164041  
3942, 142224, 3666.9658, 9.163886  
3943, 142070, 3666.9039, 9.163732  
3944, 141154, 3666.8419, 9.163577  
3945, 139788, 3666.7800, 9.163422  
3946, 138672, 3666.7181, 9.163267  
3947, 138338, 3666.6562, 9.163113  
3948, 138722, 3666.5942, 9.162958  
3949, 139238, 3666.5323, 9.162803  
3950, 139352, 3666.4704, 9.162648  
3951, 139062, 3666.4085, 9.162494  
3952, 138880, 3666.3465, 9.162339  
3953, 139274, 3666.2846, 9.162184  
3954, 140186, 3666.2227, 9.162029  
3955, 141092, 3666.1607, 9.161875  
3956, 141476, 3666.0988, 9.161720  
3957, 141244, 3666.0369, 9.161565  
3958, 140664, 3666.9750, 9.161410  
3959, 140020, 3665.9130, 9.161256  
3960, 139354, 3665.8511, 9.161101  
3961, 138594, 3665.7892, 9.160946  
3962, 137782, 3665.7273, 9.160791  
3963, 137160, 3665.6653, 9.160636  
3964, 136912, 3665.6034, 9.160482  
3965, 136962, 3665.5415, 9.160327  
3966, 137006, 3665.4795, 9.160172  
3967, 136824, 3665.4176, 9.160017  
3968, 136470, 3665.3557, 9.159863  
3969, 136190, 3665.2938, 9.159708  
3970, 136144, 3665.2318, 9.159553  
3971, 136264, 3665.1699, 9.159398  
3972, 136346, 3665.1080, 9.159244  
3973, 136276, 3665.0461, 9.159089  
3974, 136110, 3664.9841, 9.158934  
3975, 135990, 3664.9222, 9.158779  
3976, 136014, 3664.8603, 9.158625  
3977, 136184, 3664.7984, 9.158470  
3978, 136484, 3664.7364, 9.158315  
3979, 136850, 3664.6745, 9.158160  
3980, 137170, 3664.6126, 9.158006  
3981, 137310, 3664.5506, 9.157851  
3982, 137250, 3664.4887, 9.157696  
3983, 137180, 3664.4268, 9.157541  
3984, 137380, 3664.3649, 9.157387  
3985, 137932, 3664.3029, 9.157232  
3986, 138586, 3664.2410, 9.157077  
3987, 138944, 3664.1791, 9.156922  
3988, 138844, 3664.1172, 9.156768  
3989, 138504, 3664.0552, 9.156613  
3990, 138320, 3663.9933, 9.156458  
3991, 138422, 3663.9314, 9.156303  
3992, 138580, 3663.8695, 9.156149  
3993, 138470, 3663.8075, 9.155994  
3994, 138080, 3663.7456, 9.155839  
3995, 137760, 3663.6837, 9.155684  
3996, 137838, 3663.6217, 9.155529  
3997, 138244, 3663.5598, 9.155375  
3998, 138592, 3663.4979, 9.155220  
3999, 138608, 3663.4360, 9.155065  
4000, 138454, 3663.3740, 9.154910  
4001, 138576, 3663.3121, 9.154756

4002, 139212, 3663.2502, 9.154601  
4003, 140136, 3663.1883, 9.154446  
4004, 140856, 3663.1263, 9.154291  
4005, 141128, 3663.0644, 9.154137  
4006, 141150, 3663.0025, 9.153982  
4007, 141278, 3662.9405, 9.153827  
4008, 141598, 3662.8786, 9.153672  
4009, 141838, 3662.8167, 9.153518  
4010, 141708, 3662.7548, 9.153363  
4011, 141266, 3662.6928, 9.153208  
4012, 140908, 3662.6309, 9.153053  
4013, 140986, 3662.5690, 9.152899  
4014, 141476, 3662.5071, 9.152744  
4015, 142040, 3662.4451, 9.152589  
4016, 142336, 3662.3832, 9.152434  
4017, 142278, 3662.3213, 9.152280  
4018, 141968, 3662.2594, 9.152125  
4019, 141516, 3662.1974, 9.151970  
4020, 140966, 3662.1355, 9.151815  
4021, 140438, 3662.0736, 9.151661  
4022, 140158, 3662.0116, 9.151506  
4023, 140334, 3661.9497, 9.151351  
4024, 140924, 3661.8878, 9.151196  
4025, 141610, 3661.8259, 9.151042  
4026, 141996, 3661.7639, 9.150887  
4027, 141934, 3661.7020, 9.150732  
4028, 141546, 3661.6401, 9.150577  
4029, 141030, 3661.5782, 9.150422  
4030, 140492, 3661.5162, 9.150268  
4031, 139964, 3661.4543, 9.150113  
4032, 139598, 3661.3924, 9.149958  
4033, 139652, 3661.3304, 9.149803  
4034, 140292, 3661.2685, 9.149649  
4035, 141346, 3661.2066, 9.149494  
4036, 142356, 3661.1447, 9.149339  
4037, 142922, 3661.0827, 9.149184  
4038, 142994, 3661.0208, 9.149030  
4039, 142850, 3660.9589, 9.148875  
4040, 142780, 3660.8970, 9.148720  
4041, 142834, 3660.8350, 9.148565  
4042, 142854, 3660.7731, 9.148411  
4043, 142714, 3660.7112, 9.148256  
4044, 142442, 3660.6493, 9.148101  
4045, 142134, 3660.5873, 9.147946  
4046, 141778, 3660.5254, 9.147792  
4047, 141282, 3660.4635, 9.147637  
4048, 140616, 3660.4015, 9.147482  
4049, 139940, 3660.3396, 9.147327  
4050, 139482, 3660.2777, 9.147173  
4051, 139332, 3660.2158, 9.147018  
4052, 139370, 3660.1538, 9.146863  
4053, 139434, 3660.0919, 9.146708  
4054, 139494, 3660.0300, 9.146554  
4055, 139684, 3659.9681, 9.146399  
4056, 140066, 3659.9061, 9.146244  
4057, 140530, 3659.8442, 9.146089  
4058, 140856, 3659.7823, 9.145935  
4059, 140962, 3659.7203, 9.145780  
4060, 140954, 3659.6584, 9.145625  
4061, 140968, 3659.5965, 9.145470  
4062, 140950, 3659.5346, 9.145315  
4063, 140676, 3659.4726, 9.145161  
4064, 140014, 3659.4107, 9.145006  
4065, 139142, 3659.3488, 9.144851  
4066, 138456, 3659.2869, 9.144696  
4067, 138246, 3659.2249, 9.144542  
4068, 138470, 3659.1630, 9.144387  
4069, 138838, 3659.1011, 9.144232  
4070, 139108, 3659.0392, 9.144077  
4071, 139250, 3658.9772, 9.143923  
4072, 139384, 3658.9153, 9.143768  
4073, 139570, 3658.8534, 9.143613  
4074, 139740, 3658.7914, 9.143458  
4075, 139790, 3658.7295, 9.143304  
4076, 139686, 3658.6676, 9.143149  
4077, 139422, 3658.6057, 9.142994

4078, 138944, 3658.5437, 9.142839  
4079, 138184, 3658.4818, 9.142685  
4080, 137210, 3658.4199, 9.142530  
4081, 136310, 3658.3580, 9.142375  
4082, 135852, 3658.2960, 9.142220  
4083, 136002, 3658.2341, 9.142066  
4084, 136592, 3658.1722, 9.141911  
4085, 137294, 3658.1102, 9.141756  
4086, 137910, 3658.0483, 9.141601  
4087, 138464, 3657.9864, 9.141447  
4088, 139042, 3657.9245, 9.141292  
4089, 139588, 3657.8625, 9.141137  
4090, 139934, 3657.8006, 9.140982  
4091, 140018, 3657.7387, 9.140827  
4092, 139984, 3657.6768, 9.140673  
4093, 140058, 3657.6148, 9.140518  
4094, 140226, 3657.5529, 9.140363  
4095, 140222, 3657.4910, 9.140208  
4096, 139794, 3657.4291, 9.140054  
4097, 139036, 3657.3671, 9.139899  
4098, 138372, 3657.3052, 9.139744  
4099, 138184, 3657.2433, 9.139589  
4100, 138454, 3657.1813, 9.139435  
4101, 138812, 3657.1194, 9.139280  
4102, 138932, 3657.0575, 9.139125  
4103, 138836, 3656.9956, 9.138970  
4104, 138802, 3656.9336, 9.138816  
4105, 139004, 3656.8717, 9.138661  
4106, 139288, 3656.8098, 9.138506  
4107, 139362, 3656.7479, 9.138351  
4108, 139132, 3656.6859, 9.138197  
4109, 138790, 3656.6240, 9.138042  
4110, 138590, 3656.5621, 9.137887  
4111, 138550, 3656.5001, 9.137732  
4112, 138474, 3656.4382, 9.137578  
4113, 138206, 3656.3763, 9.137423  
4114, 137820, 3656.3144, 9.137268  
4115, 137532, 3656.2524, 9.137113  
4116, 137382, 3656.1905, 9.136959  
4117, 137188, 3656.1286, 9.136804  
4118, 136778, 3656.0667, 9.136649  
4119, 136272, 3656.0047, 9.136494  
4120, 136034, 3655.9428, 9.136340  
4121, 136316, 3655.8809, 9.136185  
4122, 136952, 3655.8190, 9.136030  
4123, 137494, 3655.7570, 9.135875  
4124, 137608, 3655.6951, 9.135720  
4125, 137392, 3655.6332, 9.135566  
4126, 137260, 3655.5712, 9.135411  
4127, 137518, 3655.5093, 9.135256  
4128, 138100, 3655.4474, 9.135101  
4129, 138680, 3655.3855, 9.134947  
4130, 139000, 3655.3235, 9.134792  
4131, 139058, 3655.2616, 9.134637  
4132, 138990, 3655.1997, 9.134482  
4133, 138864, 3655.1378, 9.134328  
4134, 138636, 3655.0758, 9.134173  
4135, 138294, 3655.0139, 9.134018  
4136, 137996, 3654.9520, 9.133863  
4137, 137990, 3654.8900, 9.133709  
4138, 138426, 3654.8281, 9.133554  
4139, 139210, 3654.7662, 9.133399  
4140, 140052, 3654.7043, 9.133244  
4141, 140652, 3654.6423, 9.133090  
4142, 140804, 3654.5804, 9.132935  
4143, 140472, 3654.5185, 9.132780  
4144, 139814, 3654.4566, 9.132625  
4145, 139144, 3654.3946, 9.132471  
4146, 138830, 3654.3327, 9.132316  
4147, 139098, 3654.2708, 9.132161  
4148, 139860, 3654.2089, 9.132006  
4149, 140758, 3654.1469, 9.131852  
4150, 141418, 3654.0850, 9.131697  
4151, 141710, 3654.0231, 9.131542  
4152, 141772, 3653.9611, 9.131387  
4153, 141782, 3653.8992, 9.131233

4154, 141740, 3653.8373, 9.131078  
4155, 141530, 3653.7754, 9.130923  
4156, 141118, 3653.7134, 9.130768  
4157, 140684, 3653.6515, 9.130613  
4158, 140458, 3653.5896, 9.130459  
4159, 140460, 3653.5277, 9.130304  
4160, 140470, 3653.4657, 9.130149  
4161, 140220, 3653.4038, 9.129994  
4162, 139708, 3653.3419, 9.129840  
4163, 139200, 3653.2799, 9.129685  
4164, 138942, 3653.2180, 9.129530  
4165, 138932, 3653.1561, 9.129375  
4166, 138990, 3653.0942, 9.129221  
4167, 139036, 3653.0322, 9.129066  
4168, 139240, 3652.9703, 9.128911  
4169, 139830, 3652.9084, 9.128756  
4170, 140762, 3652.8465, 9.128602  
4171, 141648, 3652.7845, 9.128447  
4172, 142052, 3652.7226, 9.128292  
4173, 141872, 3652.6607, 9.128137  
4174, 141390, 3652.5988, 9.127983  
4175, 140948, 3652.5368, 9.127828  
4176, 140620, 3652.4749, 9.127673  
4177, 140190, 3652.4130, 9.127518  
4178, 139484, 3652.3510, 9.127364  
4179, 138642, 3652.2891, 9.127209  
4180, 138068, 3652.2272, 9.127054  
4181, 138094, 3652.1653, 9.126899  
4182, 138740, 3652.1033, 9.126745  
4183, 139734, 3652.0414, 9.126590  
4184, 140732, 3651.9795, 9.126435  
4185, 141512, 3651.9176, 9.126280  
4186, 141968, 3651.8556, 9.126126  
4187, 142082, 3651.7937, 9.125971  
4188, 141930, 3651.7318, 9.125816  
4189, 141726, 3651.6699, 9.125661  
4190, 141740, 3651.6079, 9.125506  
4191, 142106, 3651.5460, 9.125352  
4192, 142690, 3651.4841, 9.125197  
4193, 143160, 3651.4221, 9.125042  
4194, 143274, 3651.3602, 9.124887  
4195, 143030, 3651.2983, 9.124733  
4196, 142580, 3651.2364, 9.124578  
4197, 142036, 3651.1744, 9.124423  
4198, 141406, 3651.1125, 9.124268  
4199, 140678, 3651.0506, 9.124114  
4200, 139984, 3650.9887, 9.123959  
4201, 139488, 3650.9267, 9.123804  
4202, 139222, 3650.8648, 9.123649  
4203, 138986, 3650.8029, 9.123495  
4204, 138586, 3650.7409, 9.123340  
4205, 138062, 3650.6790, 9.123185  
4206, 137758, 3650.6171, 9.123030  
4207, 137988, 3650.5552, 9.122876  
4208, 138724, 3650.4932, 9.122721  
4209, 139574, 3650.4313, 9.122566  
4210, 140086, 3650.3694, 9.122411  
4211, 140082, 3650.3075, 9.122257  
4212, 139690, 3650.2455, 9.122102  
4213, 139104, 3650.1836, 9.121947  
4214, 138418, 3650.1217, 9.121792  
4215, 137730, 3650.0598, 9.121638  
4216, 137324, 3649.9978, 9.121483  
4217, 137572, 3649.9359, 9.121328  
4218, 138568, 3649.8740, 9.121173  
4219, 139866, 3649.8120, 9.121019  
4220, 140668, 3649.7501, 9.120864  
4221, 140452, 3649.6882, 9.120709  
4222, 139404, 3649.6263, 9.120554  
4223, 138266, 3649.5643, 9.120399  
4224, 137686, 3649.5024, 9.120245  
4225, 137716, 3649.4405, 9.120090  
4226, 137872, 3649.3786, 9.119935  
4227, 137708, 3649.3166, 9.119780  
4228, 137238, 3649.2547, 9.119626  
4229, 136884, 3649.1928, 9.119471

4230, 136984, 3649.1308, 9.119316  
4231, 137482, 3649.0689, 9.119161  
4232, 138024, 3649.0070, 9.119007  
4233, 138354, 3648.9451, 9.118852  
4234, 138522, 3648.8831, 9.118697  
4235, 138770, 3648.8212, 9.118542  
4236, 139248, 3648.7593, 9.118388  
4237, 139818, 3648.6974, 9.118233  
4238, 140194, 3648.6354, 9.118078  
4239, 140182, 3648.5735, 9.117923  
4240, 139810, 3648.5116, 9.117769  
4241, 139310, 3648.4497, 9.117614  
4242, 138954, 3648.3877, 9.117459  
4243, 138960, 3648.3258, 9.117304  
4244, 139350, 3648.2639, 9.117150  
4245, 139926, 3648.2019, 9.116995  
4246, 140330, 3648.1400, 9.116840  
4247, 140234, 3648.0781, 9.116685  
4248, 139570, 3648.0162, 9.116531  
4249, 138616, 3647.9542, 9.116376  
4250, 137844, 3647.8923, 9.116221  
4251, 137606, 3647.8304, 9.116066  
4252, 137950, 3647.7685, 9.115912  
4253, 138648, 3647.7065, 9.115757  
4254, 139350, 3647.6446, 9.115602  
4255, 139800, 3647.5827, 9.115447  
4256, 139872, 3647.5207, 9.115292  
4257, 139578, 3647.4588, 9.115138  
4258, 139094, 3647.3969, 9.114983  
4259, 138686, 3647.3350, 9.114828  
4260, 138588, 3647.2730, 9.114673  
4261, 138814, 3647.2111, 9.114519  
4262, 139094, 3647.1492, 9.114364  
4263, 139116, 3647.0873, 9.114209  
4264, 138796, 3647.0253, 9.114054  
4265, 138370, 3646.9634, 9.113900  
4266, 138188, 3646.9015, 9.113745  
4267, 138370, 3646.8396, 9.113590  
4268, 138726, 3646.7776, 9.113435  
4269, 138992, 3646.7157, 9.113281  
4270, 139118, 3646.6538, 9.113126  
4271, 139292, 3646.5918, 9.112971  
4272, 139662, 3646.5299, 9.112816  
4273, 140096, 3646.4680, 9.112662  
4274, 140266, 3646.4061, 9.112507  
4275, 140028, 3646.3441, 9.112352  
4276, 139622, 3646.2822, 9.112197  
4277, 139494, 3646.2203, 9.112043  
4278, 139862, 3646.1584, 9.111888  
4279, 140486, 3646.0964, 9.111733  
4280, 140898, 3646.0345, 9.111578  
4281, 140824, 3645.9726, 9.111424  
4282, 140396, 3645.9106, 9.111269  
4283, 139992, 3645.8487, 9.111114  
4284, 139914, 3645.7868, 9.110959  
4285, 140204, 3645.7249, 9.110805  
4286, 140748, 3645.6629, 9.110650  
4287, 141414, 3645.6010, 9.110495  
4288, 142020, 3645.5391, 9.110340  
4289, 142306, 3645.4772, 9.110185  
4290, 142026, 3645.4152, 9.110031  
4291, 141184, 3645.3533, 9.109876  
4292, 140164, 3645.2914, 9.109721  
4293, 139508, 3645.2295, 9.109566  
4294, 139484, 3645.1675, 9.109412  
4295, 139878, 3645.1056, 9.109257  
4296, 140234, 3645.0437, 9.109102  
4297, 140284, 3644.9817, 9.108947  
4298, 140146, 3644.9198, 9.108793  
4299, 140112, 3644.8579, 9.108638  
4300, 140252, 3644.7960, 9.108483  
4301, 140356, 3644.7340, 9.108328  
4302, 140254, 3644.6721, 9.108174  
4303, 140130, 3644.6102, 9.108019  
4304, 140398, 3644.5483, 9.107864  
4305, 141240, 3644.4863, 9.107709

4306, 142292, 3644.4244, 9.107555  
4307, 142856, 3644.3625, 9.107400  
4308, 142500, 3644.3005, 9.107245  
4309, 141420, 3644.2386, 9.107090  
4310, 140276, 3644.1767, 9.106936  
4311, 139618, 3644.1148, 9.106781  
4312, 139520, 3644.0528, 9.106626  
4313, 139670, 3643.9909, 9.106471  
4314, 139758, 3643.9290, 9.106317  
4315, 139734, 3643.8671, 9.106162  
4316, 139696, 3643.8051, 9.106007  
4317, 139708, 3643.7432, 9.105852  
4318, 139748, 3643.6813, 9.105698  
4319, 139832, 3643.6194, 9.105543  
4320, 140076, 3643.5574, 9.105388  
4321, 140538, 3643.4955, 9.105233  
4322, 141084, 3643.4336, 9.105078  
4323, 141400, 3643.3716, 9.104924  
4324, 141308, 3643.3097, 9.104769  
4325, 140950, 3643.2478, 9.104614  
4326, 140706, 3643.1859, 9.104459  
4327, 140810, 3643.1239, 9.104305  
4328, 141140, 3643.0620, 9.104150  
4329, 141346, 3643.0001, 9.103995  
4330, 141244, 3642.9382, 9.103840  
4331, 140990, 3642.8762, 9.103686  
4332, 140948, 3642.8143, 9.103531  
4333, 141318, 3642.7524, 9.103376  
4334, 141994, 3642.6904, 9.103221  
4335, 142670, 3642.6285, 9.103067  
4336, 143098, 3642.5666, 9.102912  
4337, 143172, 3642.5047, 9.102757  
4338, 142882, 3642.4427, 9.102602  
4339, 142202, 3642.3808, 9.102448  
4340, 141182, 3642.3189, 9.102293  
4341, 140022, 3642.2570, 9.102138  
4342, 139060, 3642.1950, 9.101983  
4343, 138530, 3642.1331, 9.101829  
4344, 138378, 3642.0712, 9.101674  
4345, 138324, 3642.0093, 9.101519  
4346, 138130, 3641.9473, 9.101364  
4347, 137830, 3641.8854, 9.101210  
4348, 137676, 3641.8235, 9.101055  
4349, 137898, 3641.7615, 9.100900  
4350, 138488, 3641.6996, 9.100745  
4351, 139192, 3641.6377, 9.100591  
4352, 139718, 3641.5758, 9.100436  
4353, 139886, 3641.5138, 9.100281  
4354, 139690, 3641.4519, 9.100126  
4355, 139250, 3641.3900, 9.099971  
4356, 138800, 3641.3281, 9.099817  
4357, 138608, 3641.2661, 9.099662  
4358, 138876, 3641.2042, 9.099507  
4359, 139576, 3641.1423, 9.099352  
4360, 140422, 3641.0803, 9.099198  
4361, 141020, 3641.0184, 9.099043  
4362, 141150, 3640.9565, 9.098888  
4363, 140894, 3640.8946, 9.098733  
4364, 140528, 3640.8326, 9.098579  
4365, 140262, 3640.7707, 9.098424  
4366, 140064, 3640.7088, 9.098269  
4367, 139742, 3640.6469, 9.098114  
4368, 139166, 3640.5849, 9.097960  
4369, 138444, 3640.5230, 9.097805  
4370, 137860, 3640.4611, 9.097650  
4371, 137696, 3640.3992, 9.097495  
4372, 138058, 3640.3372, 9.097341  
4373, 138830, 3640.2753, 9.097186  
4374, 139750, 3640.2134, 9.097031  
4375, 140528, 3640.1514, 9.096876  
4376, 141010, 3640.0895, 9.096722  
4377, 141246, 3640.0276, 9.096567  
4378, 141428, 3639.9657, 9.096412  
4379, 141744, 3639.9037, 9.096257  
4380, 142152, 3639.8418, 9.096103  
4381, 142390, 3639.7799, 9.095948  
4382, 142180, 3639.7180, 9.095793  
4383, 141502, 3639.6560, 9.095638  
4384, 140656, 3639.5941, 9.095483  
4385, 140032, 3639.5322, 9.095329  
4386, 139780, 3639.4702, 9.095174  
4387, 139736, 3639.4083, 9.095019  
4388, 139628, 3639.3464, 9.094864  
4389, 139352, 3639.2845, 9.094710  
4390, 139038, 3639.2225, 9.094555  
4391, 138830, 3639.1606, 9.094400  
4392, 138696, 3639.0987, 9.094245  
4393, 138448, 3638.9368, 9.094091  
4394, 138026, 3638.9748, 9.093936  
4395, 137662, 3638.9129, 9.093781  
4396, 137724, 3638.8510, 9.093626  
4397, 138398, 3638.7891, 9.093472  
4398, 139454, 3638.7271, 9.093317  
4399, 140432, 3638.6652, 9.093162  
4400, 140934, 3638.6033, 9.093007  
4401, 140894, 3638.5413, 9.092853  
4402, 140490, 3638.4794, 9.092698  
4403, 139976, 3638.4175, 9.092543  
4404, 139554, 3638.3556, 9.092388  
4405, 139376, 3638.2936, 9.092234  
4406, 139538, 3638.2317, 9.092079  
4407, 139992, 3638.1698, 9.091924  
4408, 140528, 3638.1079, 9.091769  
4409, 140886, 3638.0459, 9.091615  
4410, 140952, 3637.9840, 9.091460  
4411, 140876, 3637.9221, 9.091305  
4412, 140880, 3637.8602, 9.091150  
4413, 140994, 3637.7982, 9.090996  
4414, 141012, 3637.7363, 9.090841  
4415, 140718, 3637.6744, 9.090686  
4416, 140174, 3637.6124, 9.090531  
4417, 139736, 3637.5505, 9.090376  
4418, 139670, 3637.4886, 9.090222  
4419, 139848, 3637.4267, 9.090067  
4420, 139800, 3637.3647, 9.089912  
4421, 139178, 3637.3028, 9.089757  
4422, 138098, 3637.2409, 9.089603  
4423, 137112, 3637.1790, 9.089448  
4424, 136720, 3637.1170, 9.089293  
4425, 136980, 3637.0551, 9.089138  
4426, 137550, 3636.9932, 9.088984  
4427, 138024, 3636.9312, 9.088829  
4428, 138252, 3636.8693, 9.088674  
4429, 138310, 3636.8074, 9.088519  
4430, 138318, 3636.7455, 9.088365  
4431, 138316, 3636.6835, 9.088210  
4432, 138364, 3636.6216, 9.088055  
4433, 138596, 3636.5597, 9.087900  
4434, 139126, 3636.4978, 9.087746  
4435, 139832, 3636.4358, 9.087591  
4436, 140374, 3636.3739, 9.087436  
4437, 140466, 3636.3120, 9.087281  
4438, 140202, 3636.2501, 9.087127  
4439, 140042, 3636.1881, 9.086972  
4440, 140404, 3636.1262, 9.086817  
4441, 141300, 3636.0643, 9.086662  
4442, 142288, 3636.0023, 9.086508  
4443, 142884, 3635.9404, 9.086353  
4444, 142936, 3635.8785, 9.086198  
4445, 142650, 3635.8166, 9.086043  
4446, 142268, 3635.7546, 9.085889  
4447, 141822, 3635.6927, 9.085734  
4448, 141210, 3635.6308, 9.085579  
4449, 140474, 3635.5689, 9.085424  
4450, 139946, 3635.5069, 9.085269  
4451, 140010, 3635.4450, 9.085115  
4452, 140738, 3635.3831, 9.084960  
4453, 141764, 3635.3211, 9.084805  
4454, 142554, 3635.2592, 9.084650  
4455, 142790, 3635.1973, 9.084496  
4456, 142562, 3635.1354, 9.084341  
4457, 142216, 3635.0734, 9.084186  
4458, 142000, 3635.0115, 9.084031  
4459, 141938, 3634.9496, 9.083877  
4460, 141898, 3634.8877, 9.083722  
4461, 141802, 3634.8257, 9.083567  
4462, 141724, 3634.7638, 9.083412  
4463, 141822, 3634.7019, 9.083258  
4464, 142192, 3634.6400, 9.083103  
4465, 142744, 3634.5780, 9.082948  
4466, 143220, 3634.5161, 9.082793  
4467, 143352, 3634.4542, 9.082639  
4468, 143022, 3634.3922, 9.082484  
4469, 142366, 3634.3303, 9.082329  
4470, 141704, 3634.2684, 9.082174  
4471, 141298, 3634.2065, 9.082020  
4472, 141194, 3634.1445, 9.081865  
4473, 141200, 3634.0826, 9.081710  
4474, 141114, 3634.0207, 9.081555  
4475, 140944, 3633.9588, 9.081401  
4476, 140872, 3633.8968, 9.081246  
4477, 141048, 3633.8349, 9.081091  
4478, 141374, 3633.7730, 9.080936  
4479, 141588, 3633.7110, 9.080782  
4480, 141560, 3633.6491, 9.080627  
4481, 141470, 3633.5872, 9.080472  
4482, 141670, 3633.5253, 9.080317  
4483, 142316, 3633.4633, 9.080162  
4484, 143154, 3633.4014, 9.080008  
4485, 143708, 3633.3395, 9.079853  
4486, 143718, 3633.2776, 9.079698  
4487, 143322, 3633.2156, 9.079543  
4488, 142904, 3633.1537, 9.079389  
4489, 142702, 3633.0918, 9.079234  
4490, 142676, 3633.0299, 9.079079  
4491, 142636, 3632.9679, 9.078924  
4492, 142520, 3632.9060, 9.078770  
4493, 142378, 3632.8441, 9.078615  
4494, 142236, 3632.7821, 9.078460  
4495, 141944, 3632.7202, 9.078305  
4496, 141356, 3632.6583, 9.078151  
4497, 140570, 3632.5964, 9.077996  
4498, 139978, 3632.5344, 9.077841  
4499, 139950, 3632.4725, 9.077686  
4500, 140504, 3632.4106, 9.077532  
4501, 141300, 3632.3487, 9.077377  
4502, 141954, 3632.2867, 9.077222  
4503, 142374, 3632.2248, 9.077067  
4504, 142696, 3632.1629, 9.076913  
4505, 142986, 3632.1009, 9.076758  
4506, 143052, 3632.0390, 9.076603  
4507, 142654, 3631.9771, 9.076448  
4508, 141890, 3631.9152, 9.076294  
4509, 141258, 3631.8532, 9.076139  
4510, 141274, 3631.7913, 9.075984  
4511, 141954, 3631.7294, 9.075829  
4512, 142772, 3631.6675, 9.075675  
4513, 143082, 3631.6055, 9.075520  
4514, 142686, 3631.5436, 9.075365  
4515, 141952, 3631.4817, 9.075210  
4516, 141404, 3631.4198, 9.075055  
4517, 141286, 3631.3578, 9.074901  
4518, 141416, 3631.2959, 9.074746  
4519, 141516, 3631.2340, 9.074591  
4520, 141490, 3631.1720, 9.074436  
4521, 141450, 3631.1101, 9.074282  
4522, 141500, 3631.0482, 9.074127  
4523, 141582, 3630.9863, 9.073972  
4524, 141570, 3630.9243, 9.073817  
4525, 141454, 3630.8624, 9.073663  
4526, 141348, 3630.8005, 9.073508  
4527, 141350, 3630.7386, 9.073353  
4528, 141412, 3630.6766, 9.073198  
4529, 141380, 3630.6147, 9.073044  
4530, 141176, 3630.5528, 9.072889  
4531, 140860, 3630.4908, 9.072734  
4532, 140544, 3630.4289, 9.072579  
4533, 140238, 3630.3670, 9.072425

4534, 139900, 3630.3051, 9.072270  
4535, 139540, 3630.2431, 9.072115  
4536, 139332, 3630.1812, 9.071960  
4537, 139478, 3630.1193, 9.071806  
4538, 140044, 3630.0574, 9.071651  
4539, 140886, 3629.9954, 9.071496  
4540, 141814, 3629.9335, 9.071341  
4541, 142750, 3629.8716, 9.071187  
4542, 143708, 3629.8097, 9.071032  
4543, 144640, 3629.7477, 9.070877  
4544, 145348, 3629.6858, 9.070722  
4545, 145650, 3629.6239, 9.070568  
4546, 145554, 3629.5619, 9.070413  
4547, 145308, 3629.5000, 9.070258  
4548, 145138, 3629.4381, 9.070103  
4549, 145024, 3629.3762, 9.069948  
4550, 144716, 3629.3142, 9.069794  
4551, 144030, 3629.2523, 9.069639  
4552, 143094, 3629.1904, 9.069484  
4553, 142266, 3629.1285, 9.069329  
4554, 141856, 3629.0665, 9.069175  
4555, 141858, 3629.0046, 9.069020  
4556, 141996, 3628.9427, 9.068865  
4557, 141954, 3628.8807, 9.068710  
4558, 141580, 3628.8188, 9.068556  
4559, 140882, 3628.7569, 9.068401  
4560, 139990, 3628.6950, 9.068246  
4561, 139104, 3628.6330, 9.068091  
4562, 138470, 3628.5711, 9.067937  
4563, 138318, 3628.5092, 9.067782  
4564, 138670, 3628.4473, 9.067627  
4565, 139290, 3628.3853, 9.067472  
4566, 139866, 3628.3234, 9.067318  
4567, 140278, 3628.2615, 9.067163  
4568, 140704, 3628.1996, 9.067008  
4569, 141372, 3628.1376, 9.066853  
4570, 142196, 3628.0757, 9.066699  
4571, 142748, 3628.0138, 9.066544  
4572, 142602, 3627.9518, 9.066389  
4573, 141792, 3627.8899, 9.066234  
4574, 140854, 3627.8280, 9.066080  
4575, 140402, 3627.7661, 9.065925  
4576, 140616, 3627.7041, 9.065770  
4577, 141150, 3627.6422, 9.065615  
4578, 141492, 3627.5803, 9.065461  
4579, 141408, 3627.5184, 9.065306  
4580, 141000, 3627.4564, 9.065151  
4581, 140456, 3627.3945, 9.064996  
4582, 139798, 3627.3326, 9.064841  
4583, 138958, 3627.2706, 9.064687  
4584, 138036, 3627.2087, 9.064532  
4585, 137364, 3627.1468, 9.064377  
4586, 137278, 3627.0849, 9.064222  
4587, 137764, 3627.0229, 9.064068  
4588, 138438, 3626.9610, 9.063913  
4589, 138860, 3626.8991, 9.063758  
4590, 138880, 3626.8372, 9.063603  
4591, 138692, 3626.7752, 9.063449  
4592, 138592, 3626.7133, 9.063294  
4593, 138712, 3626.6514, 9.063139  
4594, 139000, 3626.5895, 9.062984  
4595, 139368, 3626.5275, 9.062830  
4596, 139778, 3626.4656, 9.062675  
4597, 140208, 3626.4037, 9.062520  
4598, 140546, 3626.3417, 9.062365  
4599, 140654, 3626.2798, 9.062211  
4600, 140514, 3626.2179, 9.062056  
4601, 140246, 3626.1560, 9.061901  
4602, 140018, 3626.0940, 9.061746  
4603, 139866, 3626.0321, 9.061592  
4604, 139722, 3625.9702, 9.061437  
4605, 139584, 3625.9083, 9.061282  
4606, 139604, 3625.8463, 9.061127  
4607, 139990, 3625.7844, 9.060973  
4608, 140744, 3625.7225, 9.060818  
4609, 141584, 3625.6605, 9.060663  
4610, 142128, 3625.5986, 9.060508  
4611, 142196, 3625.5367, 9.060354  
4612, 141906, 3625.4748, 9.060199  
4613, 141508, 3625.4128, 9.060044  
4614, 141148, 3625.3509, 9.059889  
4615, 140818, 3625.2890, 9.059734  
4616, 140518, 3625.2271, 9.059580  
4617, 140310, 3625.1651, 9.059425  
4618, 140266, 3625.1032, 9.059270  
4619, 140336, 3625.0413, 9.059115  
4620, 140376, 3624.9794, 9.058961  
4621, 140318, 3624.9174, 9.058806  
4622, 140286, 3624.8555, 9.058651  
4623, 140440, 3624.7936, 9.058496  
4624, 140754, 3624.7316, 9.058342  
4625, 140964, 3624.6697, 9.058187  
4626, 140872, 3624.6078, 9.058032  
4627, 140634, 3624.5459, 9.057877  
4628, 140700, 3624.4839, 9.057723  
4629, 141368, 3624.4220, 9.057568  
4630, 142414, 3624.3601, 9.057413  
4631, 143206, 3624.2982, 9.057258  
4632, 143242, 3624.2362, 9.057104  
4633, 142562, 3624.1743, 9.056949  
4634, 141682, 3624.1124, 9.056794  
4635, 141066, 3624.0505, 9.056639  
4636, 140806, 3623.9885, 9.056485  
4637, 140696, 3623.9266, 9.056330  
4638, 140636, 3623.8647, 9.056175  
4639, 140790, 3623.8027, 9.056020  
4640, 141314, 3623.7408, 9.055866  
4641, 142064, 3623.6789, 9.055711  
4642, 142596, 3623.6170, 9.055556  
4643, 142562, 3623.5550, 9.055401  
4644, 142056, 3623.4931, 9.055247  
4645, 141510, 3623.4312, 9.055092  
4646, 141242, 3623.3693, 9.054937  
4647, 141190, 3623.3073, 9.054782  
4648, 141062, 3623.2454, 9.054627  
4649, 140712, 3623.1835, 9.054473  
4650, 140320, 3623.1215, 9.054318  
4651, 140156, 3623.0596, 9.054163  
4652, 140218, 3622.9977, 9.054008  
4653, 140256, 3622.9358, 9.053854  
4654, 140068, 3622.8738, 9.053699  
4655, 139724, 3622.8119, 9.053544  
4656, 139498, 3622.7500, 9.053389  
4657, 139500, 3622.6881, 9.053235  
4658, 139550, 3622.6261, 9.053080  
4659, 139378, 3622.5642, 9.052925  
4660, 138982, 3622.5023, 9.052770  
4661, 138656, 3622.4404, 9.052616  
4662, 138656, 3622.3784, 9.052461  
4663, 138900, 3622.3165, 9.052306  
4664, 139028, 3622.2546, 9.052151  
4665, 138778, 3622.1926, 9.051997  
4666, 138286, 3622.1307, 9.051842  
4667, 137910, 3622.0688, 9.051687  
4668, 137888, 3622.0069, 9.051532  
4669, 138128, 3621.9449, 9.051378  
4670, 138386, 3621.8830, 9.051223  
4671, 138580, 3621.8211, 9.051068  
4672, 138828, 3621.7592, 9.050913  
4673, 139228, 3621.6972, 9.050759  
4674, 139680, 3621.6353, 9.050604  
4675, 139952, 3621.5734, 9.050449  
4676, 139992, 3621.5114, 9.050294  
4677, 140028, 3621.4495, 9.050139  
4678, 140332, 3621.3876, 9.049985  
4679, 140936, 3621.3257, 9.049830  
4680, 141574, 3621.2637, 9.049675  
4681, 141984, 3621.2018, 9.049520  
4682, 142156, 3621.1399, 9.049366  
4683, 142322, 3621.0780, 9.049211  
4684, 142618, 3621.0160, 9.049056  
4685, 142920, 3620.9541, 9.048901  
4686, 142990, 3620.8922, 9.048747  
4687, 142790, 3620.8303, 9.048592  
4688, 142582, 3620.7683, 9.048437  
4689, 142700, 3620.7064, 9.048282  
4690, 143248, 3620.6445, 9.048128  
4691, 144042, 3620.5825, 9.047973  
4692, 144820, 3620.5206, 9.047818  
4693, 145428, 3620.4587, 9.047663  
4694, 145758, 3620.3968, 9.047509  
4695, 145622, 3620.3348, 9.047354  
4696, 144778, 3620.2729, 9.047199  
4697, 143242, 3620.2110, 9.047044  
4698, 141428, 3620.1491, 9.046890  
4699, 139980, 3620.0871, 9.046735  
4700, 139306, 3620.0252, 9.046580  
4701, 139274, 3619.9633, 9.046425  
4702, 139470, 3619.9013, 9.046271  
4703, 139638, 3619.8394, 9.046116  
4704, 139874, 3619.7775, 9.045961  
4705, 140398, 3619.7156, 9.045806  
4706, 141120, 3619.6536, 9.045652  
4707, 141614, 3619.5917, 9.045497  
4708, 141514, 3619.5298, 9.045342  
4709, 140942, 3619.4679, 9.045187  
4710, 140442, 3619.4059, 9.045032  
4711, 140478, 3619.3440, 9.044878  
4712, 140994, 3619.2821, 9.044723  
4713, 141502, 3619.2202, 9.044568  
4714, 141590, 3619.1582, 9.044413  
4715, 141296, 3619.0963, 9.044259  
4716, 140990, 3619.0344, 9.044104  
4717, 140966, 3618.9724, 9.043949  
4718, 141206, 3618.9105, 9.043794  
4719, 141520, 3618.8486, 9.043640  
4720, 141808, 3618.7867, 9.043485  
4721, 142120, 3618.7247, 9.043330  
4722, 142478, 3618.6628, 9.043175  
4723, 142720, 3618.6009, 9.043021  
4724, 142644, 3618.5390, 9.042866  
4725, 142260, 3618.4770, 9.042711  
4726, 141828, 3618.4151, 9.042556  
4727, 141606, 3618.3532, 9.042402  
4728, 141570, 3618.2912, 9.042247  
4729, 141460, 3618.2293, 9.042092  
4730, 141138, 3618.1674, 9.041937  
4731, 140788, 3618.1055, 9.041783  
4732, 140762, 3618.0435, 9.041628  
4733, 141186, 3617.9816, 9.041473  
4734, 141782, 3617.9197, 9.041318  
4735, 142142, 3617.8578, 9.041164  
4736, 142128, 3617.7958, 9.041009  
4737, 141994, 3617.7339, 9.040854  
4738, 142048, 3617.6720, 9.040699  
4739, 142252, 3617.6101, 9.040545  
4740, 142246, 3617.5481, 9.040390  
4741, 141720, 3617.4862, 9.040235  
4742, 140802, 3617.4243, 9.040080  
4743, 139960, 3617.3623, 9.039925  
4744, 139622, 3617.3004, 9.039771  
4745, 139812, 3617.2385, 9.039616  
4746, 140234, 3617.1766, 9.039461  
4747, 140596, 3617.1146, 9.039306  
4748, 140826, 3617.1527, 9.039152  
4749, 141028, 3616.9908, 9.038997  
4750, 141234, 3616.9289, 9.038842  
4751, 141418, 3616.8669, 9.038687  
4752, 141586, 3616.8050, 9.038533  
4753, 141892, 3616.7431, 9.038378  
4754, 142528, 3616.6811, 9.038223  
4755, 143490, 3616.6192, 9.038068  
4756, 144522, 3616.5573, 9.037914  
4757, 145304, 3616.4954, 9.037759  
4758, 145674, 3616.4334, 9.037604  
4759, 145666, 3616.3715, 9.037449  
4760, 145366, 3616.3096, 9.037295  
4761, 144774, 3616.2477, 9.037140

4762, 143876, 3616.1857, 9.036985  
4763, 142834, 3616.1238, 9.036830  
4764, 141992, 3616.0619, 9.036676  
4765, 141604, 3616.0000, 9.036521  
4766, 141614, 3615.9380, 9.036366  
4767, 141606, 3615.8761, 9.036211  
4768, 141198, 3615.8142, 9.036057  
4769, 140342, 3615.7522, 9.035902  
4770, 139376, 3615.6903, 9.035747  
4771, 138752, 3615.6284, 9.035592  
4772, 138724, 3615.5665, 9.035438  
4773, 139208, 3615.5045, 9.035283  
4774, 139950, 3615.4426, 9.035128  
4775, 140676, 3615.3807, 9.034973  
4776, 141170, 3615.3188, 9.034818  
4777, 141310, 3615.2568, 9.034664  
4778, 141088, 3615.1949, 9.034509  
4779, 140670, 3615.1330, 9.034354  
4780, 140310, 3615.0710, 9.034199  
4781, 140220, 3615.0091, 9.034045  
4782, 140398, 3614.9472, 9.033890  
4783, 140664, 3614.8853, 9.033735  
4784, 140850, 3614.8233, 9.033580  
4785, 140930, 3614.7614, 9.033426  
4786, 140996, 3614.6995, 9.033271  
4787, 141092, 3614.6376, 9.033116  
4788, 141096, 3614.5756, 9.032961  
4789, 140882, 3614.5137, 9.032807  
4790, 140434, 3614.4518, 9.032652  
4791, 139912, 3614.3899, 9.032497  
4792, 139524, 3614.3279, 9.032342  
4793, 139372, 3614.2660, 9.032188  
4794, 139456, 3614.2041, 9.032033  
4795, 139744, 3614.1421, 9.031878  
4796, 140218, 3614.0802, 9.031723  
4797, 140798, 3614.0183, 9.031569  
4798, 141304, 3613.9564, 9.031414  
4799, 141528, 3613.8944, 9.031259  
4800, 141478, 3613.8325, 9.031104  
4801, 141388, 3613.7706, 9.030950  
4802, 141544, 3613.7087, 9.030795  
4803, 141948, 3613.6467, 9.030640  
4804, 142256, 3613.5848, 9.030485  
4805, 142064, 3613.5229, 9.030331  
4806, 141288, 3613.4609, 9.030176  
4807, 140300, 3613.3990, 9.030021  
4808, 139616, 3613.3371, 9.029866  
4809, 139506, 3613.2752, 9.029711  
4810, 139850, 3613.2132, 9.029557  
4811, 140348, 3613.1513, 9.029402  
4812, 140836, 3613.0894, 9.029247  
4813, 141332, 3613.0275, 9.029092  
4814, 141862, 3612.9655, 9.028938  
4815, 142314, 3612.9036, 9.028783  
4816, 142496, 3612.8417, 9.028628  
4817, 142354, 3612.7798, 9.028473  
4818, 142084, 3612.7178, 9.028319  
4819, 141952, 3612.6559, 9.028164  
4820, 142098, 3612.5940, 9.028009  
4821, 142426, 3612.5320, 9.027854  
4822, 142750, 3612.4701, 9.027700  
4823, 142964, 3612.4082, 9.027545  
4824, 143092, 3612.3463, 9.027390  
4825, 143162, 3612.2843, 9.027235  
4826, 143162, 3612.2224, 9.027081  
4827, 143070, 3612.1605, 9.026926  
4828, 142952, 3612.0986, 9.026771  
4829, 142932, 3612.0366, 9.026616  
4830, 143088, 3611.9747, 9.026462  
4831, 143368, 3611.9128, 9.026307  
4832, 143638, 3611.8509, 9.026152  
4833, 143812, 3611.7889, 9.025997  
4834, 143876, 3611.7270, 9.025843  
4835, 143848, 3611.6651, 9.025688  
4836, 143720, 3611.6031, 9.025533  
4837, 143496, 3611.5412, 9.025378  
4838, 143278, 3611.4793, 9.025224  
4839, 143260, 3611.4174, 9.025069  
4840, 143564, 3611.3554, 9.024914  
4841, 144098, 3611.2935, 9.024759  
4842, 144642, 3611.2316, 9.024604  
4843, 145042, 3611.1697, 9.024450  
4844, 145340, 3611.1077, 9.024295  
4845, 145644, 3611.0458, 9.024140  
4846, 145906, 3610.9839, 9.023985  
4847, 145888, 3610.9219, 9.023831  
4848, 145416, 3610.8600, 9.023676  
4849, 144664, 3610.7981, 9.023521  
4850, 144106, 3610.7362, 9.023366  
4851, 144128, 3610.6742, 9.023212  
4852, 144640, 3610.6123, 9.023057  
4853, 145140, 3610.5504, 9.022902  
4854, 145154, 3610.4885, 9.022747  
4855, 144640, 3610.4265, 9.022593  
4856, 143954, 3610.3646, 9.022438  
4857, 143420, 3610.3027, 9.022283  
4858, 143030, 3610.2408, 9.022128  
4859, 142556, 3610.1788, 9.021974  
4860, 141922, 3610.1169, 9.021819  
4861, 141412, 3610.0550, 9.021664  
4862, 141416, 3609.9930, 9.021509  
4863, 142042, 3609.9311, 9.021355  
4864, 142964, 3609.8692, 9.021200  
4865, 143694, 3609.8073, 9.021045  
4866, 143970, 3609.7454, 9.020890  
4867, 143878, 3609.6834, 9.020736  
4868, 143640, 3609.6215, 9.020581  
4869, 143370, 3609.5596, 9.020426  
4870, 143046, 3609.4976, 9.020271  
4871, 142682, 3609.4357, 9.020117  
4872, 142412, 3609.3738, 9.019962  
4873, 142364, 3609.3118, 9.019807  
4874, 142494, 3609.2499, 9.019652  
4875, 142630, 3609.1880, 9.019497  
4876, 142672, 3609.1261, 9.019343  
4877, 142742, 3609.0641, 9.019188  
4878, 143050, 3609.0022, 9.019033  
4879, 143620, 3608.9403, 9.018878  
4880, 144198, 3608.8784, 9.018724  
4881, 144472, 3608.8164, 9.018569  
4882, 144356, 3608.7545, 9.018414  
4883, 144068, 3608.6926, 9.018259  
4884, 143894, 3608.6307, 9.018105  
4885, 143918, 3608.5687, 9.017950  
4886, 144008, 3608.5068, 9.017795  
4887, 144032, 3608.4449, 9.017640  
4888, 144034, 3608.3829, 9.017486  
4889, 144130, 3608.3210, 9.017331  
4890, 144312, 3608.2591, 9.017176  
4891, 144384, 3608.1972, 9.017021  
4892, 144120, 3608.1352, 9.016867  
4893, 143528, 3608.0733, 9.016712  
4894, 142872, 3608.0114, 9.016557  
4895, 142444, 3607.9495, 9.016402  
4896, 142352, 3607.8875, 9.016248  
4897, 142522, 3607.8256, 9.016093  
4898, 142814, 3607.7637, 9.015938  
4899, 143162, 3607.7017, 9.015783  
4900, 143484, 3607.6398, 9.015629  
4901, 143656, 3607.5779, 9.015474  
4902, 143540, 3607.5160, 9.015319  
4903, 143180, 3607.4540, 9.015164  
4904, 142826, 3607.3921, 9.015010  
4905, 142780, 3607.3302, 9.014855  
4906, 143110, 3607.2683, 9.014700  
4907, 143612, 3607.2063, 9.014545  
4908, 144028, 3607.1444, 9.014390  
4909, 144290, 3607.0825, 9.014236  
4910, 144556, 3607.0206, 9.014081  
4911, 144938, 3606.9586, 9.013926  
4912, 145298, 3606.8967, 9.013771  
4913, 145302, 3606.8348, 9.013617  
4914, 144758, 3606.7728, 9.013462  
4915, 143806, 3606.7109, 9.013307  
4916, 142870, 3606.6490, 9.013152  
4917, 142336, 3606.5871, 9.012998  
4918, 142334, 3606.5251, 9.012843  
4919, 142784, 3606.4632, 9.012688  
4920, 143508, 3606.4013, 9.012533  
4921, 144330, 3606.3394, 9.012379  
4922, 145054, 3606.2774, 9.012224  
4923, 145458, 3606.2155, 9.012069  
4924, 145424, 3606.1536, 9.011914  
4925, 145044, 3606.0916, 9.011760  
4926, 144556, 3606.0297, 9.011605  
4927, 144114, 3605.9678, 9.011450  
4928, 143686, 3605.9059, 9.011295  
4929, 143130, 3605.8439, 9.011141  
4930, 142464, 3605.7820, 9.010986  
4931, 141950, 3605.7201, 9.010831  
4932, 141892, 3605.6582, 9.010676  
4933, 142348, 3605.5962, 9.010522  
4934, 143070, 3605.5343, 9.010367  
4935, 143714, 3605.4724, 9.010212  
4936, 144132, 3605.4105, 9.010057  
4937, 144366, 3605.3485, 9.009903  
4938, 144472, 3605.2866, 9.009748  
4939, 144394, 3605.2247, 9.009593  
4940, 144086, 3605.1627, 9.009438  
4941, 143700, 3605.1008, 9.009283  
4942, 143596, 3605.0389, 9.009129  
4943, 144026, 3604.9770, 9.008974  
4944, 144872, 3604.9150, 9.008819  
4945, 145702, 3604.8531, 9.008664  
4946, 146150, 3604.7912, 9.008510  
4947, 146188, 3604.7293, 9.008355  
4948, 146010, 3604.6673, 9.008200  
4949, 145722, 3604.6054, 9.008045  
4950, 145182, 3604.5435, 9.007891  
4951, 144248, 3604.4815, 9.007736  
4952, 143118, 3604.4196, 9.007581  
4953, 142270, 3604.3577, 9.007426  
4954, 142044, 3604.2958, 9.007272  
4955, 142250, 3604.2338, 9.007117  
4956, 142312, 3604.1719, 9.006962  
4957, 141804, 3604.1100, 9.006807  
4958, 140888, 3604.0481, 9.006653  
4959, 140124, 3603.9861, 9.006498  
4960, 139960, 3603.9242, 9.006343  
4961, 140302, 3603.8623, 9.006188  
4962, 140746, 3603.8004, 9.006034  
4963, 141034, 3603.7384, 9.005879  
4964, 141266, 3603.6765, 9.005724  
4965, 141648, 3603.6146, 9.005569  
4966, 142104, 3603.5526, 9.005415  
4967, 142296, 3603.4907, 9.005260  
4968, 141996, 3603.4288, 9.005105  
4969, 141440, 3603.3669, 9.004950  
4970, 141150, 3603.3049, 9.004795  
4971, 141466, 3603.2430, 9.004641  
4972, 142220, 3603.1811, 9.004486  
4973, 142966, 3603.1192, 9.004331  
4974, 143444, 3603.0572, 9.004176  
4975, 143762, 3602.9953, 9.004022  
4976, 144112, 3602.9334, 9.003867  
4977, 144416, 3602.8714, 9.003712  
4978, 144324, 3602.8095, 9.003557  
4979, 143626, 3602.7476, 9.003403  
4980, 142582, 3602.6857, 9.003248  
4981, 141758, 3602.6237, 9.003093  
4982, 141500, 3602.5618, 9.002938  
4983, 141632, 3602.4999, 9.002784  
4984, 141676, 3602.4380, 9.002629  
4985, 141362, 3602.3760, 9.002474  
4986, 140880, 3602.3141, 9.002319  
4987, 140632, 3602.2522, 9.002165  
4988, 140810, 3602.1903, 9.002010  
4989, 141274, 3602.1283, 9.001855









5674, 141292, 3559.7084, 8.895846  
5675, 142182, 3559.6465, 8.895691  
5676, 143138, 3559.5845, 8.895537  
5677, 143768, 3559.5226, 8.895382  
5678, 144054, 3559.4607, 8.895227  
5679, 144270, 3559.3988, 8.895072  
5680, 144622, 3559.3368, 8.894918  
5681, 145002, 3559.2749, 8.894763  
5682, 145140, 3559.2130, 8.894608  
5683, 144948, 3559.1511, 8.894453  
5684, 144648, 3559.0891, 8.894299  
5685, 144542, 3559.0272, 8.894144  
5686, 144694, 3558.9653, 8.893989  
5687, 144948, 3558.9033, 8.893834  
5688, 145162, 3558.8414, 8.893679  
5689, 145390, 3558.7795, 8.893525  
5690, 145762, 3558.7176, 8.893370  
5691, 146242, 3558.6556, 8.893215  
5692, 146578, 3558.5937, 8.893060  
5693, 146560, 3558.5318, 8.892906  
5694, 146272, 3558.4699, 8.892751  
5695, 146022, 3558.4079, 8.892596  
5696, 146022, 3558.3460, 8.892441  
5697, 146162, 3558.2841, 8.892287  
5698, 146216, 3558.2222, 8.892132  
5699, 146140, 3558.1602, 8.891977  
5700, 146160, 3558.0983, 8.891822  
5701, 146472, 3558.0364, 8.891668  
5702, 146942, 3557.9744, 8.891513  
5703, 147136, 3557.9125, 8.891358  
5704, 146778, 3557.8506, 8.891203  
5705, 146034, 3557.7887, 8.891049  
5706, 145346, 3557.7267, 8.890894  
5707, 144986, 3557.6648, 8.890739  
5708, 144756, 3557.6029, 8.890584  
5709, 144270, 3557.5410, 8.890430  
5710, 143410, 3557.4790, 8.890275  
5711, 142508, 3557.4171, 8.890120  
5712, 142052, 3557.3552, 8.889965  
5713, 142218, 3557.2932, 8.889811  
5714, 142752, 3557.2313, 8.889656  
5715, 143274, 3557.1694, 8.889501  
5716, 143612, 3557.1075, 8.889346  
5717, 143864, 3557.0455, 8.889192  
5718, 144162, 3556.9836, 8.889037  
5719, 144500, 3556.9217, 8.888882  
5720, 144816, 3556.8598, 8.888727  
5721, 145154, 3556.7978, 8.888572  
5722, 145612, 3556.7359, 8.888418  
5723, 146136, 3556.6740, 8.888263  
5724, 146426, 3556.6121, 8.888108  
5725, 146162, 3556.5501, 8.887953  
5726, 145380, 3556.4882, 8.887799  
5727, 144530, 3556.4263, 8.887644  
5728, 144108, 3556.3643, 8.887489  
5729, 144192, 3556.3024, 8.887334  
5730, 144414, 3556.2405, 8.887180  
5731, 144348, 3556.1786, 8.887025  
5732, 143920, 3556.1166, 8.886870  
5733, 143436, 3556.0547, 8.886715  
5734, 143192, 3555.9928, 8.886561  
5735, 143194, 3555.9309, 8.886406  
5736, 143252, 3555.8689, 8.886251  
5737, 143288, 3555.8070, 8.886096  
5738, 143440, 3555.7451, 8.885942  
5739, 143812, 3555.6831, 8.885787  
5740, 144210, 3555.6212, 8.885632  
5741, 144256, 3555.5593, 8.885477  
5742, 143802, 3555.4974, 8.885323  
5743, 143174, 3555.4354, 8.885168  
5744, 142934, 3555.3735, 8.885013  
5745, 143352, 3555.3116, 8.884858  
5746, 144124, 3555.2497, 8.884704  
5747, 144704, 3555.1877, 8.884549  
5748, 144812, 3555.1258, 8.884394  
5749, 144666, 3555.0639, 8.884239

5750, 144658, 3555.0020, 8.884085  
5751, 144940, 3554.9400, 8.883930  
5752, 145316, 3554.8781, 8.883775  
5753, 145548, 3554.8162, 8.883620  
5754, 145656, 3554.7542, 8.883465  
5755, 145828, 3554.6923, 8.883311  
5756, 146120, 3554.6304, 8.883156  
5757, 146342, 3554.5685, 8.883001  
5758, 146294, 3554.5065, 8.882846  
5759, 146062, 3554.4446, 8.882692  
5760, 145972, 3554.3827, 8.882537  
5761, 146248, 3554.3208, 8.882382  
5762, 146704, 3554.2588, 8.882227  
5763, 146962, 3554.1969, 8.882073  
5764, 146856, 3554.1350, 8.881918  
5765, 146672, 3554.0730, 8.881763  
5766, 146820, 3554.0111, 8.881608  
5767, 147380, 3553.9492, 8.881454  
5768, 147962, 3553.8873, 8.881299  
5769, 148104, 3553.8253, 8.881144  
5770, 147710, 3553.7634, 8.880989  
5771, 147088, 3553.7015, 8.880835  
5772, 146558, 3553.6396, 8.880680  
5773, 146114, 3553.5776, 8.880525  
5774, 145522, 3553.5157, 8.880370  
5775, 144704, 3553.4538, 8.880216  
5776, 143936, 3553.3919, 8.880061  
5777, 143624, 3553.3299, 8.879906  
5778, 143878, 3553.2680, 8.879751  
5779, 144466, 3553.2061, 8.879597  
5780, 145076, 3553.1441, 8.879442  
5781, 145652, 3553.0822, 8.879287  
5782, 146296, 3553.0203, 8.879132  
5783, 146978, 3552.9584, 8.878978  
5784, 147376, 3552.8964, 8.878823  
5785, 147184, 3552.8345, 8.878668  
5786, 146486, 3552.7726, 8.878513  
5787, 145758, 3552.7107, 8.878358  
5788, 145440, 3552.6487, 8.878204  
5789, 145458, 3552.5868, 8.878049  
5790, 145300, 3552.5249, 8.877894  
5791, 144570, 3552.4629, 8.877739  
5792, 143424, 3552.4010, 8.877585  
5793, 142440, 3552.3391, 8.877430  
5794, 142036, 3552.2772, 8.877275  
5795, 142096, 3552.2152, 8.877120  
5796, 142168, 3552.1533, 8.876966  
5797, 141966, 3552.0914, 8.876811  
5798, 141630, 3552.0295, 8.876656  
5799, 141456, 3551.9675, 8.876501  
5800, 141502, 3551.9056, 8.876347  
5801, 141552, 3551.8437, 8.876192  
5802, 141440, 3551.7818, 8.876037  
5803, 141326, 3551.7198, 8.875882  
5804, 141546, 3551.6579, 8.875728  
5805, 142148, 3551.5960, 8.875573  
5806, 142736, 3551.5340, 8.875418  
5807, 142796, 3551.4721, 8.875263  
5808, 142276, 3551.4102, 8.875109  
5809, 141698, 3551.3483, 8.874954  
5810, 141752, 3551.2863, 8.874799  
5811, 142638, 3551.2244, 8.874644  
5812, 143900, 3551.1625, 8.874490  
5813, 144814, 3551.1006, 8.874335  
5814, 144960, 3551.0386, 8.874180  
5815, 144452, 3550.9767, 8.874025  
5816, 143704, 3550.9148, 8.873870  
5817, 143084, 3550.8528, 8.873716  
5818, 142764, 3550.7909, 8.873561  
5819, 142804, 3550.7290, 8.873406  
5820, 143192, 3550.6671, 8.873251  
5821, 143780, 3550.6051, 8.873097  
5822, 144202, 3550.5432, 8.872942  
5823, 144086, 3550.4813, 8.872787  
5824, 143338, 3550.4194, 8.872632  
5825, 142326, 3550.3574, 8.872478

5826, 141632, 3550.2955, 8.872323  
5827, 141670, 3550.2336, 8.872168  
5828, 142426, 3550.1717, 8.872013  
5829, 143548, 3550.1097, 8.871859  
5830, 144672, 3550.0478, 8.871704  
5831, 145596, 3549.9859, 8.871549  
5832, 146272, 3549.9239, 8.871394  
5833, 146666, 3549.8620, 8.871240  
5834, 146758, 3549.8001, 8.871085  
5835, 146562, 3549.7382, 8.870930  
5836, 146194, 3549.6762, 8.870775  
5837, 145800, 3549.6143, 8.870621  
5838, 145440, 3549.5524, 8.870466  
5839, 145110, 3549.4905, 8.870311  
5840, 144832, 3549.4285, 8.870156  
5841, 144676, 3549.3666, 8.870002  
5842, 144720, 3549.3047, 8.869847  
5843, 144900, 3549.2427, 8.869692  
5844, 145046, 3549.1808, 8.869537  
5845, 145000, 3549.1189, 8.869383  
5846, 144952, 3549.0570, 8.869228  
5847, 144998, 3548.9950, 8.869073  
5848, 145304, 3548.9331, 8.868918  
5849, 145772, 3548.8712, 8.868763  
5850, 146154, 3548.8093, 8.868609  
5851, 146248, 3548.7473, 8.868454  
5852, 146042, 3548.6854, 8.868299  
5853, 145694, 3548.6235, 8.868144  
5854, 145376, 3548.5616, 8.867990  
5855, 145212, 3548.4996, 8.867835  
5856, 145298, 3548.4377, 8.867680  
5857, 145698, 3548.3758, 8.867525  
5858, 146340, 3548.3138, 8.867371  
5859, 146986, 3548.2519, 8.867216  
5860, 147292, 3548.1900, 8.867061  
5861, 147058, 3548.1281, 8.866906  
5862, 146404, 3548.0661, 8.866752  
5863, 145678, 3548.0042, 8.866597  
5864, 145202, 3547.9423, 8.866442  
5865, 145040, 3547.8804, 8.866287  
5866, 145052, 3547.8184, 8.866133  
5867, 145084, 3547.7565, 8.865978  
5868, 145122, 3547.6946, 8.865823  
5869, 145218, 3547.6326, 8.865668  
5870, 145328, 3547.5707, 8.865514  
5871, 145250, 3547.5088, 8.865359  
5872, 144776, 3547.4469, 8.865204  
5873, 143880, 3547.3849, 8.865049  
5874, 142790, 3547.3230, 8.864895  
5875, 141874, 3547.2611, 8.864740  
5876, 141414, 3547.1992, 8.864585  
5877, 141488, 3547.1372, 8.864430  
5878, 141946, 3547.0753, 8.864276  
5879, 142498, 3547.0134, 8.864121  
5880, 142880, 3546.9515, 8.863966  
5881, 143012, 3546.8895, 8.863811  
5882, 143090, 3546.8276, 8.863656  
5883, 143450, 3546.7657, 8.863502  
5884, 144268, 3546.7037, 8.863347  
5885, 145360, 3546.6418, 8.863192  
5886, 146244, 3546.5799, 8.863037  
5887, 146564, 3546.5180, 8.862883  
5888, 146420, 3546.4560, 8.862728  
5889, 146306, 3546.3941, 8.862573  
5890, 146672, 3546.3322, 8.862418  
5891, 147448, 3546.2703, 8.862264  
5892, 148116, 3546.2083, 8.862109  
5893, 148164, 3546.1464, 8.861954  
5894, 147558, 3546.0845, 8.861799  
5895, 146736, 3546.0226, 8.861645  
5896, 146136, 3545.9606, 8.861490  
5897, 145800, 3545.8987, 8.861335  
5898, 145452, 3545.8368, 8.861180  
5899, 144908, 3545.7748, 8.861026  
5900, 144362, 3545.7129, 8.860871  
5901, 144260, 3545.6510, 8.860716

5902, 144838, 3545.5891, 8.860561  
5903, 145888, 3545.5271, 8.860407  
5904, 146948, 3545.4652, 8.860252  
5905, 147668, 3545.4033, 8.860097  
5906, 147978, 3545.3414, 8.859942  
5907, 147968, 3545.2794, 8.859788  
5908, 147650, 3545.2175, 8.859633  
5909, 147010, 3545.1556, 8.859478  
5910, 146198, 3545.0936, 8.859323  
5911, 145582, 3545.0317, 8.859169  
5912, 145526, 3544.9698, 8.859014  
5913, 146048, 3544.9079, 8.858859  
5914, 146774, 3544.8459, 8.858704  
5915, 147224, 3544.7840, 8.858549  
5916, 147166, 3544.7221, 8.858395  
5917, 146730, 3544.6602, 8.858240  
5918, 146178, 3544.5982, 8.858085  
5919, 145646, 3544.5363, 8.857930  
5920, 145130, 3544.4744, 8.857776  
5921, 144638, 3544.4125, 8.857621  
5922, 144324, 3544.3505, 8.857466  
5923, 144346, 3544.2886, 8.857311  
5924, 144730, 3544.2267, 8.857157  
5925, 145316, 3544.1647, 8.857002  
5926, 145870, 3544.1028, 8.856847  
5927, 146238, 3544.0409, 8.856692  
5928, 146354, 3543.9790, 8.856538  
5929, 146226, 3543.9170, 8.856383  
5930, 145958, 3543.8551, 8.856228  
5931, 145814, 3543.7932, 8.856073  
5932, 146120, 3543.7313, 8.855919  
5933, 146982, 3543.6693, 8.855764  
5934, 148090, 3543.6074, 8.855609  
5935, 148838, 3543.5455, 8.855454  
5936, 148828, 3543.4835, 8.855300  
5937, 148236, 3543.4216, 8.855145  
5938, 147662, 3543.3597, 8.854990  
5939, 147514, 3543.2978, 8.854835  
5940, 147588, 3543.2358, 8.854681  
5941, 147268, 3543.1739, 8.854526  
5942, 146214, 3543.1120, 8.854371  
5943, 144812, 3543.0501, 8.854216  
5944, 143886, 3542.9881, 8.854062  
5945, 143940, 3542.9262, 8.853907  
5946, 144666, 3542.8643, 8.853752  
5947, 145278, 3542.8024, 8.853597  
5948, 145260, 3542.7404, 8.853442  
5949, 144802, 3542.6785, 8.853288  
5950, 144528, 3542.6166, 8.853133  
5951, 144830, 3542.5546, 8.852978  
5952, 145550, 3542.4927, 8.852823  
5953, 146242, 3542.4308, 8.852669  
5954, 146632, 3542.3689, 8.852514  
5955, 146768, 3542.3069, 8.852359  
5956, 146778, 3542.2450, 8.852204  
5957, 146626, 3542.1831, 8.852050  
5958, 146214, 3542.1212, 8.851895  
5959, 145670, 3542.0592, 8.851740  
5960, 145352, 3541.9973, 8.851585  
5961, 145522, 3541.9354, 8.851431  
5962, 146008, 3541.8734, 8.851276  
5963, 146278, 3541.8115, 8.851121  
5964, 145962, 3541.7496, 8.850966  
5965, 145232, 3541.6877, 8.850812  
5966, 144684, 3541.6257, 8.850657  
5967, 144752, 3541.5638, 8.850502  
5968, 145340, 3541.5019, 8.850347  
5969, 145910, 3541.4400, 8.850193  
5970, 146022, 3541.3780, 8.850038  
5971, 145638, 3541.3161, 8.849883  
5972, 145000, 3541.2542, 8.849728  
5973, 144334, 3541.1923, 8.849574  
5974, 143712, 3541.1303, 8.849419  
5975, 143212, 3541.0684, 8.849264  
5976, 143032, 3541.0065, 8.849109  
5977, 143350, 3540.9445, 8.848955  
5978, 144032, 3540.8826, 8.848800  
5979, 144644, 3540.8207, 8.848645  
5980, 144768, 3540.7588, 8.848490  
5981, 144388, 3540.6968, 8.848335  
5982, 143890, 3540.6349, 8.848181  
5983, 143656, 3540.5730, 8.848026  
5984, 143740, 3540.5111, 8.847871  
5985, 143928, 3540.4491, 8.847716  
5986, 144082, 3540.3872, 8.847562  
5987, 144350, 3540.3253, 8.847407  
5988, 144928, 3540.2633, 8.847252  
5989, 145686, 3540.2014, 8.847097  
5990, 146128, 3540.1395, 8.846943  
5991, 145806, 3540.0776, 8.846788  
5992, 144774, 3540.0156, 8.846633  
5993, 143616, 3539.9537, 8.846478  
5994, 142952, 3539.8918, 8.846324  
5995, 142948, 3539.8299, 8.846169  
5996, 143296, 3539.7679, 8.846014  
5997, 143596, 3539.7060, 8.845859  
5998, 143748, 3539.6441, 8.845705  
5999, 143902, 3539.5822, 8.845550  
6000, 144198, 3539.5202, 8.845395  
6001, 144554, 3539.4583, 8.845240  
6002, 144798, 3539.3964, 8.845086  
6003, 144876, 3539.3344, 8.844931  
6004, 144866, 3539.2725, 8.844776  
6005, 144812, 3539.2106, 8.844621  
6006, 144586, 3539.1487, 8.844467  
6007, 144034, 3539.0867, 8.844312  
6008, 143228, 3539.0248, 8.844157  
6009, 142514, 3538.9629, 8.844002  
6010, 142248, 3538.9010, 8.843848  
6011, 142506, 3538.8390, 8.843693  
6012, 143042, 3538.7771, 8.843538  
6013, 143564, 3538.7152, 8.843383  
6014, 144004, 3538.6532, 8.843228  
6015, 144476, 3538.5913, 8.843074  
6016, 145044, 3538.5294, 8.842919  
6017, 145556, 3538.4675, 8.842764  
6018, 145798, 3538.4055, 8.842609  
6019, 145732, 3538.3436, 8.842455  
6020, 145568, 3538.2817, 8.842300  
6021, 145558, 3538.2198, 8.842145  
6022, 145758, 3538.1578, 8.841990  
6023, 145988, 3538.0959, 8.841836  
6024, 146074, 3538.0340, 8.841681  
6025, 146010, 3537.9721, 8.841526  
6026, 145946, 3537.9101, 8.841371  
6027, 145988, 3537.8482, 8.841217  
6028, 146102, 3537.7863, 8.841062  
6029, 146192, 3537.7243, 8.840907  
6030, 146256, 3537.6624, 8.840752  
6031, 146366, 3537.6005, 8.840598  
6032, 146564, 3537.5386, 8.840443  
6033, 146750, 3537.4766, 8.840288  
6034, 146772, 3537.4147, 8.840133  
6035, 146558, 3537.3528, 8.839979  
6036, 146224, 3537.2909, 8.839824  
6037, 145936, 3537.2289, 8.839669  
6038, 145846, 3537.1670, 8.839514  
6039, 145992, 3537.1051, 8.839360  
6040, 146366, 3537.0431, 8.839205  
6041, 146872, 3536.9812, 8.839050  
6042, 147338, 3536.9193, 8.838895  
6043, 147560, 3536.8574, 8.838741  
6044, 147472, 3536.7954, 8.838586  
6045, 147286, 3536.7335, 8.838431  
6046, 147364, 3536.6716, 8.838276  
6047, 147876, 3536.6097, 8.838121  
6048, 148562, 3536.5477, 8.837967  
6049, 148886, 3536.4858, 8.837812  
6050, 148580, 3536.4239, 8.837657  
6051, 147942, 3536.3620, 8.837502  
6052, 147636, 3536.3000, 8.837348  
6053, 148056, 3536.2381, 8.837193  
6054, 148934, 3536.1762, 8.837038  
6055, 149538, 3536.1142, 8.836883  
6056, 149372, 3536.0523, 8.836729  
6057, 148598, 3535.9904, 8.836574  
6058, 147846, 3535.9285, 8.836419  
6059, 147598, 3535.8665, 8.836264  
6060, 147820, 3535.8046, 8.836110  
6061, 148140, 3535.7427, 8.835955  
6062, 148342, 3535.6808, 8.835800  
6063, 148536, 3535.6188, 8.835645  
6064, 148920, 3535.5569, 8.835491  
6065, 149432, 3535.4950, 8.835336  
6066, 149724, 3535.4330, 8.835181  
6067, 149534, 3535.3711, 8.835026  
6068, 148978, 3535.3092, 8.834872  
6069, 148444, 3535.2473, 8.834717  
6070, 148186, 3535.1853, 8.834562  
6071, 148118, 3535.1234, 8.834407  
6072, 147994, 3535.0615, 8.834253  
6073, 147732, 3534.9996, 8.834098  
6074, 147538, 3534.9376, 8.833943  
6075, 147660, 3534.8757, 8.833788  
6076, 148062, 3534.8138, 8.833634  
6077, 148428, 3534.7519, 8.833479  
6078, 148434, 3534.6899, 8.833324  
6079, 147988, 3534.6280, 8.833169  
6080, 147210, 3534.5661, 8.833014  
6081, 146254, 3534.5041, 8.832860  
6082, 145226, 3534.4422, 8.832705  
6083, 144286, 3534.3803, 8.832550  
6084, 143716, 3534.3184, 8.832395  
6085, 143762, 3534.2564, 8.832241  
6086, 144386, 3534.1945, 8.832086  
6087, 145240, 3534.1326, 8.831931  
6088, 145930, 3534.0707, 8.831776  
6089, 146336, 3534.0087, 8.831622  
6090, 146612, 3533.9468, 8.831467  
6091, 146912, 3533.8849, 8.831312  
6092, 147142, 3533.8229, 8.831157  
6093, 147116, 3533.7610, 8.831003  
6094, 146890, 3533.6991, 8.830848  
6095, 146846, 3533.6372, 8.830693  
6096, 147346, 3533.5752, 8.830538  
6097, 148308, 3533.5133, 8.830384  
6098, 149164, 3533.4514, 8.830229  
6099, 149372, 3533.3895, 8.830074  
6100, 148936, 3533.3275, 8.829919  
6101, 148402, 3533.2656, 8.829765  
6102, 148296, 3533.2037, 8.829610  
6103, 148610, 3533.1418, 8.829455  
6104, 148860, 3533.0798, 8.829300  
6105, 148656, 3533.0179, 8.829146  
6106, 148138, 3532.9560, 8.828991  
6107, 147798, 3532.8940, 8.828836  
6108, 147950, 3532.8321, 8.828681  
6109, 148372, 3532.7702, 8.828526  
6110, 148576, 3532.7083, 8.828372  
6111, 148312, 3532.6463, 8.828217  
6112, 147822, 3532.5844, 8.828062  
6113, 147544, 3532.5225, 8.827907  
6114, 147672, 3532.4606, 8.827753  
6115, 148014, 3532.3986, 8.827598  
6116, 148272, 3532.3367, 8.827443  
6117, 148336, 3532.2748, 8.827288  
6118, 148300, 3532.2129, 8.827134  
6119, 148240, 3532.1509, 8.826979  
6120, 148064, 3532.0890, 8.826824  
6121, 147660, 3532.0271, 8.826669  
6122, 147120, 3531.9651, 8.826515  
6123, 146704, 3531.9032, 8.826360  
6124, 146626, 3531.8413, 8.826205  
6125, 146824, 3531.7794, 8.826050  
6126, 147060, 3531.7174, 8.825896  
6127, 147168, 3531.6555, 8.825741  
6128, 147206, 3531.5936, 8.825586  
6129, 147338, 3531.5317, 8.825431

6130, 147618, 3531.4697, 8.825277  
6131, 147996, 3531.4078, 8.825122  
6132, 148452, 3531.3459, 8.824967  
6133, 149062, 3531.2839, 8.824812  
6134, 149854, 3531.2220, 8.824658  
6135, 150568, 3531.1601, 8.824503  
6136, 150744, 3531.0982, 8.824348  
6137, 150116, 3531.0362, 8.824193  
6138, 148960, 3530.9743, 8.824039  
6139, 147970, 3530.9124, 8.823884  
6140, 147708, 3530.8505, 8.823729  
6141, 148130, 3530.7885, 8.823574  
6142, 148682, 3530.7266, 8.823419  
6143, 148838, 3530.6647, 8.823265  
6144, 148538, 3530.6028, 8.823110  
6145, 148160, 3530.5408, 8.822955  
6146, 148046, 3530.4789, 8.822800  
6147, 148186, 3530.4170, 8.822646  
6148, 148306, 3530.3550, 8.822491  
6149, 148232, 3530.2931, 8.822336  
6150, 148048, 3530.2312, 8.822181  
6151, 147948, 3530.1693, 8.822027  
6152, 147982, 3530.1073, 8.821872  
6153, 148014, 3530.0454, 8.821717  
6154, 147908, 3529.9835, 8.821562  
6155, 147712, 3529.9216, 8.821408  
6156, 147576, 3529.8596, 8.821253  
6157, 147568, 3529.7977, 8.821098  
6158, 147612, 3529.7358, 8.820943  
6159, 147630, 3529.6738, 8.820789  
6160, 147686, 3529.6119, 8.820634  
6161, 147942, 3529.5500, 8.820479  
6162, 148402, 3529.4881, 8.820324  
6163, 148844, 3529.4261, 8.820170  
6164, 148982, 3529.3642, 8.820015  
6165, 148756, 3529.3023, 8.819860  
6166, 148404, 3529.2404, 8.819705  
6167, 148212, 3529.1784, 8.819551  
6168, 148236, 3529.1165, 8.819396  
6169, 148264, 3529.0546, 8.819241  
6170, 148082, 3528.9927, 8.819086  
6171, 147722, 3528.9307, 8.818932  
6172, 147406, 3528.8688, 8.818777  
6173, 147306, 3528.8069, 8.818622  
6174, 147358, 3528.7449, 8.818467  
6175, 147322, 3528.6830, 8.818312  
6176, 147042, 3528.6211, 8.818158  
6177, 146532, 3528.5592, 8.818003  
6178, 145916, 3528.4972, 8.817848  
6179, 145312, 3528.4353, 8.817693  
6180, 144800, 3528.3734, 8.817539  
6181, 144484, 3528.3115, 8.817384  
6182, 144504, 3528.2495, 8.817229  
6183, 144892, 3528.1876, 8.817074  
6184, 145498, 3528.1257, 8.816920  
6185, 146078, 3528.0637, 8.816765  
6186, 146486, 3528.0018, 8.816610  
6187, 146738, 3527.9399, 8.816455  
6188, 146888, 3527.8780, 8.816301  
6189, 146848, 3527.8160, 8.816146  
6190, 146462, 3527.7541, 8.815991  
6191, 145758, 3527.6922, 8.815836  
6192, 145118, 3527.6303, 8.815682  
6193, 145030, 3527.5683, 8.815527  
6194, 145680, 3527.5064, 8.815372  
6195, 146710, 3527.4445, 8.815217  
6196, 147556, 3527.3826, 8.815063  
6197, 147924, 3527.3206, 8.814908  
6198, 148036, 3527.2587, 8.814753  
6199, 148278, 3527.1968, 8.814598  
6200, 148730, 3527.1348, 8.814444  
6201, 149014, 3527.0729, 8.814289  
6202, 148712, 3527.0110, 8.814134  
6203, 147846, 3526.9491, 8.813979  
6204, 146928, 3526.8871, 8.813825  
6205, 146476, 3526.8252, 8.813670

6206, 146600, 3526.7633, 8.813515  
6207, 146950, 3526.7014, 8.813360  
6208, 147166, 3526.6394, 8.813205  
6209, 147238, 3526.5775, 8.813051  
6210, 147412, 3526.5156, 8.812896  
6211, 147850, 3526.4536, 8.812741  
6212, 148402, 3526.3917, 8.812586  
6213, 148742, 3526.3298, 8.812432  
6214, 148702, 3526.2679, 8.812277  
6215, 148380, 3526.2059, 8.812122  
6216, 147978, 3526.1440, 8.811967  
6217, 147582, 3526.0821, 8.811813  
6218, 147184, 3526.0202, 8.811658  
6219, 146824, 3525.9582, 8.811503  
6220, 146648, 3525.8963, 8.811348  
6221, 146732, 3525.8344, 8.811194  
6222, 146948, 3525.7725, 8.811039  
6223, 147034, 3525.7105, 8.810884  
6224, 146894, 3525.6486, 8.810729  
6225, 146714, 3525.5867, 8.810575  
6226, 146756, 3525.5247, 8.810420  
6227, 147002, 3525.4628, 8.810265  
6228, 147102, 3525.4009, 8.810110  
6229, 146696, 3525.3390, 8.809956  
6230, 145854, 3525.2770, 8.809801  
6231, 145104, 3525.2151, 8.809646  
6232, 145008, 3525.1532, 8.809491  
6233, 145716, 3525.0913, 8.809337  
6234, 146884, 3525.0293, 8.809182  
6235, 148060, 3524.9674, 8.809027  
6236, 149004, 3524.9055, 8.808872  
6237, 149770, 3524.8435, 8.808718  
6238, 150392, 3524.7816, 8.808563  
6239, 150738, 3524.7197, 8.808408  
6240, 150630, 3524.6578, 8.808253  
6241, 150084, 3524.5958, 8.808098  
6242, 149360, 3524.5339, 8.807944  
6243, 148730, 3524.4720, 8.807789  
6244, 148256, 3524.4101, 8.807634  
6245, 147844, 3524.3481, 8.807479  
6246, 147448, 3524.2862, 8.807325  
6247, 147168, 3524.2243, 8.807170  
6248, 147108, 3524.1624, 8.807015  
6249, 147166, 3524.1004, 8.806860  
6250, 147114, 3524.0385, 8.806706  
6251, 146880, 3523.9766, 8.806551  
6252, 146720, 3523.9146, 8.806396  
6253, 147006, 3523.8527, 8.806241  
6254, 147806, 3523.7908, 8.806087  
6255, 148692, 3523.7289, 8.805932  
6256, 149060, 3523.6669, 8.805777  
6257, 148678, 3523.6050, 8.805622  
6258, 147870, 3523.5431, 8.805468  
6259, 147236, 3523.4812, 8.805313  
6260, 147106, 3523.4192, 8.805158  
6261, 147312, 3523.3573, 8.805003  
6262, 147472, 3523.2954, 8.804849  
6263, 147368, 3523.2334, 8.804694  
6264, 147108, 3523.1715, 8.804539  
6265, 146926, 3523.1096, 8.804384  
6266, 146922, 3523.0477, 8.804230  
6267, 147078, 3522.9857, 8.804075  
6268, 147342, 3522.9238, 8.803920  
6269, 147706, 3522.8619, 8.803765  
6270, 148082, 3522.8000, 8.803611  
6271, 148236, 3522.7380, 8.803456  
6272, 147926, 3522.6761, 8.803301  
6273, 147210, 3522.6142, 8.803146  
6274, 146514, 3522.5523, 8.802991  
6275, 146324, 3522.4903, 8.802837  
6276, 146728, 3522.4284, 8.802682  
6277, 147292, 3522.3665, 8.802527  
6278, 147412, 3522.3045, 8.802372  
6279, 146852, 3522.2426, 8.802218  
6280, 145952, 3522.1807, 8.802063  
6281, 145356, 3522.1188, 8.801908

6282, 145480, 3522.0568, 8.801753  
6283, 146226, 3521.9949, 8.801599  
6284, 147122, 3521.9330, 8.801444  
6285, 147656, 3521.8711, 8.801289  
6286, 147620, 3521.8091, 8.801134  
6287, 147142, 3521.7472, 8.800980  
6288, 146570, 3521.6853, 8.800825  
6289, 146278, 3521.6233, 8.800670  
6290, 146446, 3521.5614, 8.800515  
6291, 146910, 3521.4995, 8.800361  
6292, 147244, 3521.4376, 8.800206  
6293, 147020, 3521.3756, 8.800051  
6294, 146184, 3521.3137, 8.799896  
6295, 145134, 3521.2518, 8.799742  
6296, 144456, 3521.1899, 8.799587  
6297, 144456, 3521.1279, 8.799432  
6298, 144962, 3521.0660, 8.799277  
6299, 145548, 3521.0041, 8.799123  
6300, 145982, 3520.9422, 8.798968  
6301, 146358, 3520.8802, 8.798813  
6302, 146900, 3520.8183, 8.798658  
6303, 147594, 3520.7564, 8.798504  
6304, 148114, 3520.6944, 8.798349  
6305, 148128, 3520.6325, 8.798194  
6306, 147634, 3520.5706, 8.798039  
6307, 146954, 3520.5087, 8.797884  
6308, 146402, 3520.4467, 8.797730  
6309, 146030, 3520.3848, 8.797575  
6310, 145676, 3520.3229, 8.797420  
6311, 145276, 3520.2610, 8.797265  
6312, 144992, 3520.1990, 8.797111  
6313, 145044, 3520.1371, 8.796956  
6314, 145438, 3520.0752, 8.796801  
6315, 145930, 3520.0132, 8.796646  
6316, 146280, 3519.9513, 8.796492  
6317, 146524, 3519.8894, 8.796337  
6318, 146882, 3519.8275, 8.796182  
6319, 147482, 3519.7655, 8.796027  
6320, 148144, 3519.7036, 8.795873  
6321, 148514, 3519.6417, 8.795718  
6322, 148378, 3519.5798, 8.795563  
6323, 147820, 3519.5178, 8.795408  
6324, 147078, 3519.4559, 8.795254  
6325, 146318, 3519.3940, 8.795099  
6326, 145604, 3519.3321, 8.794944  
6327, 145044, 3519.2701, 8.794789  
6328, 144844, 3519.2082, 8.794635  
6329, 145164, 3519.1463, 8.794480  
6330, 145852, 3519.0843, 8.794325  
6331, 146496, 3519.0224, 8.794170  
6332, 146722, 3518.9605, 8.794016  
6333, 146548, 3518.8986, 8.793861  
6334, 146336, 3518.8366, 8.793706  
6335, 146420, 3518.7747, 8.793551  
6336, 146776, 3518.7128, 8.793397  
6337, 147098, 3518.6509, 8.793242  
6338, 147148, 3518.5889, 8.793087  
6339, 147040, 3518.5270, 8.792932  
6340, 147092, 3518.4651, 8.792777  
6341, 147458, 3518.4032, 8.792623  
6342, 147944, 3518.3412, 8.792468  
6343, 148202, 3518.2793, 8.792313  
6344, 148040, 3518.2174, 8.792158  
6345, 147582, 3518.1554, 8.792004  
6346, 147066, 3518.0935, 8.791849  
6347, 146622, 3518.0316, 8.791694  
6348, 146236, 3517.9697, 8.791539  
6349, 145916, 3517.9077, 8.791385  
6350, 145790, 3517.8458, 8.791230  
6351, 145976, 3517.7839, 8.791075  
6352, 146420, 3517.7220, 8.790920  
6353, 146890, 3517.6600, 8.790766  
6354, 147188, 3517.5981, 8.790611  
6355, 147328, 3517.5362, 8.790456  
6356, 147482, 3517.4742, 8.790301  
6357, 147732, 3517.4123, 8.790147

6358, 147930, 3517.3504, 8.789992  
6359, 147848, 3517.2885, 8.789837  
6360, 147444, 3517.2265, 8.789682  
6361, 146942, 3517.1646, 8.789528  
6362, 146636, 3517.1027, 8.789373  
6363, 146618, 3517.0408, 8.789218  
6364, 146722, 3516.9788, 8.789063  
6365, 146732, 3516.9169, 8.788909  
6366, 146604, 3516.8550, 8.788754  
6367, 146476, 3516.7931, 8.788599  
6368, 146542, 3516.7311, 8.788444  
6369, 146874, 3516.6692, 8.788290  
6370, 147410, 3516.6073, 8.788135  
6371, 148030, 3516.5453, 8.787980  
6372, 148568, 3516.4834, 8.787825  
6373, 148824, 3516.4214, 8.787670  
6374, 148620, 3516.3596, 8.787516  
6375, 147972, 3516.2976, 8.787361  
6376, 147172, 3516.2357, 8.787206  
6377, 146644, 3516.1738, 8.787051  
6378, 146626, 3516.1119, 8.786897  
6379, 146976, 3516.0499, 8.786742  
6380, 147314, 3515.9880, 8.786587  
6381, 147380, 3515.9261, 8.786432  
6382, 147222, 3515.8641, 8.786278  
6383, 147090, 3515.8022, 8.786123  
6384, 147152, 3515.7403, 8.785968  
6385, 147354, 3515.6784, 8.785813  
6386, 147590, 3515.6164, 8.785659  
6387, 147880, 3515.5545, 8.785504  
6388, 148306, 3515.4926, 8.785349  
6389, 148806, 3515.4307, 8.785194  
6390, 149076, 3515.3687, 8.785040  
6391, 148798, 3515.3068, 8.784885  
6392, 148026, 3515.2449, 8.784730  
6393, 147262, 3515.1830, 8.784575  
6394, 147070, 3515.1210, 8.784421  
6395, 147602, 3515.0591, 8.784266  
6396, 148438, 3514.9972, 8.784111  
6397, 148968, 3514.9352, 8.783956  
6398, 148898, 3514.8733, 8.783802  
6399, 148424, 3514.8114, 8.783647  
6400, 147934, 3514.7495, 8.783492  
6401, 147614, 3514.6875, 8.783337  
6402, 147360, 3514.6256, 8.783182  
6403, 147030, 3514.5637, 8.783028  
6404, 146682, 3514.5018, 8.782873  
6405, 146556, 3514.4398, 8.782718  
6406, 146796, 3514.3779, 8.782563  
6407, 147284, 3514.3160, 8.782409  
6408, 147762, 3514.2540, 8.782254  
6409, 148030, 3514.1921, 8.782099  
6410, 148084, 3514.1302, 8.781944  
6411, 148004, 3514.0683, 8.781790  
6412, 147868, 3514.0063, 8.781635  
6413, 147732, 3513.9444, 8.781480  
6414, 147704, 3513.8825, 8.781325  
6415, 147898, 3513.8206, 8.781171  
6416, 148296, 3513.7586, 8.781016  
6417, 148674, 3513.6967, 8.780861  
6418, 148744, 3513.6348, 8.780706  
6419, 148436, 3513.5729, 8.780552  
6420, 147992, 3513.5109, 8.780397  
6421, 147788, 3513.4490, 8.780242  
6422, 147992, 3513.3871, 8.780087  
6423, 148456, 3513.3251, 8.779933  
6424, 148878, 3513.2632, 8.779778  
6425, 149098, 3513.2013, 8.779623  
6426, 149188, 3513.1394, 8.779468  
6427, 149258, 3513.0774, 8.779314  
6428, 149282, 3513.0155, 8.779159  
6429, 149120, 3512.9536, 8.779004  
6430, 148746, 3512.8917, 8.778849  
6431, 148348, 3512.8297, 8.778695  
6432, 148190, 3512.7678, 8.778540  
6433, 148372, 3512.7059, 8.778385

6434, 148736, 3512.6439, 8.778230  
6435, 149012, 3512.5820, 8.778075  
6436, 149062, 3512.5201, 8.777921  
6437, 148948, 3512.4582, 8.777766  
6438, 148766, 3512.3962, 8.777611  
6439, 148548, 3512.3343, 8.777456  
6440, 148248, 3512.2724, 8.777302  
6441, 147878, 3512.2105, 8.777147  
6442, 147534, 3512.1485, 8.776992  
6443, 147322, 3512.0866, 8.776837  
6444, 147274, 3512.0247, 8.776683  
6445, 147352, 3511.9628, 8.776528  
6446, 147544, 3511.9008, 8.776373  
6447, 147884, 3511.8389, 8.776218  
6448, 148342, 3511.7770, 8.776064  
6449, 148750, 3511.7150, 8.775909  
6450, 148884, 3511.6531, 8.775754  
6451, 148662, 3511.5912, 8.775599  
6452, 148210, 3511.5293, 8.775445  
6453, 147732, 3511.4673, 8.775290  
6454, 147304, 3511.4054, 8.775135  
6455, 146872, 3511.3435, 8.774980  
6456, 146480, 3511.2816, 8.774826  
6457, 146374, 3511.2196, 8.774671  
6458, 146836, 3511.1577, 8.774516  
6459, 147800, 3511.0958, 8.774361  
6460, 148734, 3511.0338, 8.774207  
6461, 149028, 3510.9719, 8.774052  
6462, 148570, 3510.9100, 8.773897  
6463, 147916, 3510.8481, 8.773742  
6464, 147812, 3510.7861, 8.773588  
6465, 148478, 3510.7242, 8.773433  
6466, 149406, 3510.6623, 8.773278  
6467, 149856, 3510.6004, 8.773123  
6468, 149584, 3510.5384, 8.772968  
6469, 149034, 3510.4765, 8.772814  
6470, 148824, 3510.4146, 8.772659  
6471, 149112, 3510.3527, 8.772504  
6472, 149460, 3510.2907, 8.772349  
6473, 149352, 3510.2288, 8.772195  
6474, 148756, 3510.1669, 8.772040  
6475, 148120, 3510.1049, 8.771885  
6476, 147862, 3510.0430, 8.771730  
6477, 147910, 3509.9811, 8.771576  
6478, 147826, 3509.9192, 8.771421  
6479, 147296, 3509.8572, 8.771266  
6480, 146496, 3509.7953, 8.771111  
6481, 145910, 3509.7334, 8.770957  
6482, 145874, 3509.6715, 8.770802  
6483, 146296, 3509.6095, 8.770647  
6484, 146824, 3509.5476, 8.770492  
6485, 147202, 3509.4857, 8.770338  
6486, 147396, 3509.4237, 8.770183  
6487, 147488, 3509.3618, 8.770028  
6488, 147496, 3509.2999, 8.769873  
6489, 147408, 3509.2380, 8.769719  
6490, 147314, 3509.1760, 8.769564  
6491, 147384, 3509.1141, 8.769409  
6492, 147720, 3509.0522, 8.769254  
6493, 148200, 3508.9903, 8.769100  
6494, 148574, 3508.9283, 8.768945  
6495, 148724, 3508.8664, 8.768790  
6496, 148760, 3508.8045, 8.768635  
6497, 148830, 3508.7426, 8.768481  
6498, 148848, 3508.6806, 8.768326  
6499, 148534, 3508.6187, 8.768171  
6500, 147730, 3508.5568, 8.768016  
6501, 146678, 3508.4948, 8.767861  
6502, 145940, 3508.4329, 8.767707  
6503, 145970, 3508.3710, 8.767552  
6504, 146732, 3508.3091, 8.767397  
6505, 147812, 3508.2471, 8.767242  
6506, 148800, 3508.1852, 8.767088  
6507, 149564, 3508.1233, 8.766933  
6508, 150208, 3508.0614, 8.766778  
6509, 150750, 3507.9994, 8.766623

6510, 151054, 3507.9375, 8.766469  
6511, 150980, 3507.8756, 8.766314  
6512, 150606, 3507.8136, 8.766159  
6513, 150182, 3507.7517, 8.766004  
6514, 149858, 3507.6898, 8.765850  
6515, 149538, 3507.6279, 8.765695  
6516, 149026, 3507.5659, 8.765540  
6517, 148308, 3507.5040, 8.765385  
6518, 147662, 3507.4421, 8.765231  
6519, 147388, 3507.3802, 8.765076  
6520, 147470, 3507.3182, 8.764921  
6521, 147582, 3507.2563, 8.764766  
6522, 147380, 3507.1944, 8.764612  
6523, 146860, 3507.1325, 8.764457  
6524, 146336, 3507.0705, 8.764302  
6525, 146130, 3506.9886, 8.764147  
6526, 146292, 3506.9467, 8.763993  
6527, 146604, 3506.8847, 8.763838  
6528, 146844, 3506.8228, 8.763683  
6529, 146926, 3506.7609, 8.763528  
6530, 146910, 3506.6990, 8.763374  
6531, 146790, 3506.6370, 8.763219  
6532, 146502, 3506.5751, 8.763064  
6533, 146036, 3506.5132, 8.762909  
6534, 145564, 3506.4513, 8.762754  
6535, 145342, 3506.3893, 8.762600  
6536, 145504, 3506.3274, 8.762445  
6537, 145950, 3506.2655, 8.762290  
6538, 146440, 3506.2036, 8.762135  
6539, 146814, 3506.1416, 8.761981  
6540, 147066, 3506.0797, 8.761826  
6541, 147286, 3506.0178, 8.761671  
6542, 147530, 3505.9558, 8.761516  
6543, 147786, 3505.8939, 8.761362  
6544, 148034, 3505.8320, 8.761207  
6545, 148272, 3505.7701, 8.761052  
6546, 148488, 3505.7081, 8.760897  
6547, 148634, 3505.6462, 8.760743  
6548, 148682, 3505.5843, 8.760588  
6549, 148712, 3505.5224, 8.760433  
6550, 148874, 3505.4604, 8.760278  
6551, 149238, 3505.3985, 8.760124  
6552, 149696, 3505.3366, 8.759969  
6553, 150034, 3505.2746, 8.759814  
6554, 150160, 3505.2127, 8.759659  
6555, 150174, 3505.1508, 8.759505  
6556, 150250, 3505.0889, 8.759350  
6557, 150406, 3505.0269, 8.759195  
6558, 150442, 3504.9650, 8.759040  
6559, 150168, 3504.9031, 8.758886  
6560, 149626, 3504.8412, 8.758731  
6561, 149092, 3504.7792, 8.758576  
6562, 148770, 3504.7173, 8.758421  
6563, 148594, 3504.6554, 8.758267  
6564, 148328, 3504.5935, 8.758112  
6565, 147864, 3504.5315, 8.757957  
6566, 147434, 3504.4696, 8.757802  
6567, 147340, 3504.4077, 8.757647  
6568, 147626, 3504.3457, 8.757493  
6569, 147952, 3504.2838, 8.757338  
6570, 147918, 3504.2219, 8.757183  
6571, 147474, 3504.1600, 8.757028  
6572, 146974, 3504.0980, 8.756874  
6573, 146814, 3504.0361, 8.756719  
6574, 147026, 3503.9742, 8.756564  
6575, 147268, 3503.9123, 8.756409  
6576, 147212, 3503.8503, 8.756255  
6577, 146876, 3503.7884, 8.756100  
6578, 146560, 3503.7265, 8.755945  
6579, 146486, 3503.6645, 8.755790  
6580, 146572, 3503.6026, 8.755636  
6581, 146568, 3503.5407, 8.755481  
6582, 146404, 3503.4788, 8.755326  
6583, 146304, 3503.4168, 8.755171  
6584, 146556, 3503.3549, 8.755017  
6585, 147212, 3503.2930, 8.754862

6586, 148026, 3503.2311, 8.754707  
6587, 148718, 3503.1691, 8.754552  
6588, 149182, 3503.1072, 8.754398  
6589, 149464, 3503.0453, 8.754243  
6590, 149560, 3502.9834, 8.754088  
6591, 149372, 3502.9214, 8.753933  
6592, 148864, 3502.8595, 8.753779  
6593, 148232, 3502.7976, 8.753624  
6594, 147798, 3502.7356, 8.753469  
6595, 147698, 3502.6737, 8.753314  
6596, 147692, 3502.6118, 8.753160  
6597, 147402, 3502.5499, 8.753005  
6598, 146688, 3502.4879, 8.752850  
6599, 145818, 3502.4260, 8.752695  
6600, 145204, 3502.3641, 8.752540  
6601, 144972, 3502.3022, 8.752386  
6602, 144852, 3502.2402, 8.752231  
6603, 144508, 3502.1783, 8.752076  
6604, 143932, 3502.1164, 8.751921  
6605, 143478, 3502.0544, 8.751767  
6606, 143488, 3501.9925, 8.751612  
6607, 143926, 3501.9306, 8.751457  
6608, 144464, 3501.8687, 8.751302  
6609, 144838, 3501.8067, 8.751148  
6610, 145156, 3501.7448, 8.750993  
6611, 145710, 3501.6829, 8.750838  
6612, 146582, 3501.6210, 8.750683  
6613, 147408, 3501.5590, 8.750529  
6614, 147648, 3501.4971, 8.750374  
6615, 147050, 3501.4352, 8.750219  
6616, 145908, 3501.3733, 8.750064  
6617, 144830, 3501.3113, 8.749910  
6618, 144282, 3501.2494, 8.749755  
6619, 144306, 3501.1875, 8.749600  
6620, 144592, 3501.1255, 8.749445  
6621, 144828, 3501.0636, 8.749291  
6622, 144888, 3501.0017, 8.749136  
6623, 144866, 3500.9398, 8.748981  
6624, 144920, 3500.8778, 8.748826  
6625, 145172, 3500.8159, 8.748672  
6626, 145630, 3500.7540, 8.748517  
6627, 146210, 3500.6921, 8.748362  
6628, 146732, 3500.6301, 8.748207  
6629, 147034, 3500.5682, 8.748053  
6630, 147064, 3500.5063, 8.747898  
6631, 146908, 3500.4443, 8.747743  
6632, 146720, 3500.3824, 8.747588  
6633, 146594, 3500.3205, 8.747433  
6634, 146526, 3500.2586, 8.747279  
6635, 146490, 3500.1966, 8.747124  
6636, 146548, 3500.1347, 8.746969  
6637, 146800, 3500.0728, 8.746814  
6638, 147268, 3500.0109, 8.746660  
6639, 147808, 3499.9489, 8.746505  
6640, 148208, 3499.8870, 8.746350  
6641, 148394, 3499.8251, 8.746195  
6642, 148512, 3499.7632, 8.746041  
6643, 148766, 3499.7012, 8.745886  
6644, 149196, 3499.6393, 8.745731  
6645, 149596, 3499.5774, 8.745576  
6646, 149712, 3499.5154, 8.745422  
6647, 149464, 3499.4535, 8.745267  
6648, 149018, 3499.3916, 8.745112  
6649, 148598, 3499.3297, 8.744957  
6650, 148298, 3499.2677, 8.744803  
6651, 148060, 3499.2058, 8.744648  
6652, 147822, 3499.1439, 8.744493  
6653, 147576, 3499.0820, 8.744338  
6654, 147364, 3499.0200, 8.744184  
6655, 147148, 3498.9581, 8.744029  
6656, 146866, 3498.8962, 8.743874  
6657, 146530, 3498.8342, 8.743719  
6658, 146320, 3498.7723, 8.743565  
6659, 146426, 3498.7104, 8.743410  
6660, 146824, 3498.6485, 8.743255  
6661, 147226, 3498.5865, 8.743100  
6662, 147314, 3498.5246, 8.742946  
6663, 147044, 3498.4627, 8.742791  
6664, 146690, 3498.4008, 8.742636  
6665, 146596, 3498.3388, 8.742481  
6666, 146830, 3498.2769, 8.742326  
6667, 147132, 3498.2150, 8.742172  
6668, 147200, 3498.1531, 8.742017  
6669, 146976, 3498.0911, 8.741862  
6670, 146700, 3498.0292, 8.741707  
6671, 146638, 3497.9673, 8.741553  
6672, 146832, 3497.9053, 8.741398  
6673, 147082, 3497.8434, 8.741243  
6674, 147158, 3497.7815, 8.741088  
6675, 146990, 3497.7196, 8.740934  
6676, 146682, 3497.6576, 8.740779  
6677, 146404, 3497.5957, 8.740624  
6678, 146304, 3497.5338, 8.740469  
6679, 146510, 3497.4719, 8.740315  
6680, 147100, 3497.4099, 8.740160  
6681, 148008, 3497.3480, 8.740005  
6682, 148964, 3497.2861, 8.739850  
6683, 149614, 3497.2241, 8.739696  
6684, 149822, 3497.1622, 8.739541  
6685, 149814, 3497.1003, 8.739386  
6686, 150006, 3497.0384, 8.739231  
6687, 150618, 3496.9764, 8.739077  
6688, 151414, 3496.9145, 8.738922  
6689, 151894, 3496.8526, 8.738767  
6690, 151718, 3496.7907, 8.738612  
6691, 151028, 3496.7287, 8.738458  
6692, 150292, 3496.6668, 8.738303  
6693, 149868, 3496.6049, 8.738148  
6694, 149718, 3496.5430, 8.737993  
6695, 149540, 3496.4810, 8.737838  
6696, 149118, 3496.4191, 8.737684  
6697, 148568, 3496.3572, 8.737529  
6698, 148220, 3496.2952, 8.737374  
6699, 148268, 3496.2333, 8.737219  
6700, 148618, 3496.1714, 8.737065  
6701, 148984, 3496.1095, 8.736910  
6702, 149182, 3496.0475, 8.736755  
6703, 149248, 3495.9856, 8.736600  
6704, 149350, 3495.9237, 8.736446  
6705, 149554, 3495.8618, 8.736291  
6706, 149786, 3495.7998, 8.736136  
6707, 149884, 3495.7379, 8.735981  
6708, 149762, 3495.6760, 8.735827  
6709, 149472, 3495.6140, 8.735672  
6710, 149120, 3495.5521, 8.735517  
6711, 148782, 3495.4902, 8.735362  
6712, 148470, 3495.4283, 8.735208  
6713, 148158, 3495.3663, 8.735053  
6714, 147852, 3495.3044, 8.734898  
6715, 147586, 3495.2425, 8.734743  
6716, 147420, 3495.1806, 8.734589  
6717, 147390, 3495.1186, 8.734434  
6718, 147492, 3495.0567, 8.734279  
6719, 147674, 3494.9948, 8.734124  
6720, 147866, 3494.9329, 8.733970  
6721, 148044, 3494.8709, 8.733815  
6722, 148264, 3494.8090, 8.733660  
6723, 148622, 3494.7471, 8.733505  
6724, 149174, 3494.6851, 8.733351  
6725, 149860, 3494.6232, 8.733196  
6726, 150526, 3494.5613, 8.733041  
6727, 151030, 3494.4994, 8.732886  
6728, 151294, 3494.4374, 8.732731  
6729, 151346, 3494.3755, 8.732577  
6730, 151246, 3494.3136, 8.732422  
6731, 151062, 3494.2517, 8.732267  
6732, 150842, 3494.1897, 8.732112  
6733, 150630, 3494.1278, 8.731958  
6734, 150396, 3494.0659, 8.731803  
6735, 150048, 3494.0039, 8.731648  
6736, 149490, 3493.9420, 8.731493  
6737, 148770, 3493.8801, 8.731339  
6738, 148146, 3493.8182, 8.731184  
6739, 147972, 3493.7562, 8.731029  
6740, 148424, 3493.6943, 8.730874  
6741, 149302, 3493.6324, 8.730720  
6742, 150148, 3493.5705, 8.730565  
6743, 150572, 3493.5085, 8.730410  
6744, 150534, 3493.4466, 8.730255  
6745, 150308, 3493.3847, 8.730101  
6746, 150192, 3493.3228, 8.729946  
6747, 150226, 3493.2608, 8.729791  
6748, 150172, 3493.1989, 8.729636  
6749, 149822, 3493.1370, 8.729482  
6750, 149190, 3493.0750, 8.729327  
6751, 148530, 3493.0131, 8.729172  
6752, 148094, 3492.9512, 8.729017  
6753, 147920, 3492.8893, 8.728863  
6754, 147858, 3492.8273, 8.728708  
6755, 147722, 3492.7654, 8.728553  
6756, 147474, 3492.7035, 8.728398  
6757, 147214, 3492.6416, 8.728244  
6758, 147034, 3492.5796, 8.728089  
6759, 146930, 3492.5177, 8.727934  
6760, 146832, 3492.4558, 8.727779  
6761, 146728, 3492.3939, 8.727624  
6762, 146728, 3492.3319, 8.727470  
6763, 146988, 3492.2700, 8.727315  
6764, 147570, 3492.2081, 8.727160  
6765, 148312, 3492.1461, 8.727005  
6766, 148850, 3492.0842, 8.726851  
6767, 148848, 3492.0223, 8.726696  
6768, 148258, 3491.9604, 8.726541  
6769, 147458, 3491.8984, 8.726386  
6770, 147084, 3491.8365, 8.726232  
6771, 147616, 3491.7746, 8.726077  
6772, 149004, 3491.7127, 8.725922  
6773, 150632, 3491.6507, 8.725767  
6774, 151742, 3491.5888, 8.725613  
6775, 151932, 3491.5269, 8.725458  
6776, 151380, 3491.4649, 8.725303  
6777, 150606, 3491.4030, 8.725148  
6778, 150026, 3491.3411, 8.724994  
6779, 149684, 3491.2792, 8.724839  
6780, 149418, 3491.2172, 8.724684  
6781, 149178, 3491.1553, 8.724529  
6782, 149126, 3491.0934, 8.724375  
6783, 149414, 3491.0315, 8.724220  
6784, 149928, 3490.9695, 8.724065  
6785, 150282, 3490.9076, 8.723910  
6786, 150168, 3490.8457, 8.723756  
6787, 149648, 3490.7838, 8.723601  
6788, 149140, 3490.7218, 8.723446  
6789, 149046, 3490.6599, 8.723291  
6790, 149418, 3490.5980, 8.723137  
6791, 149990, 3490.5360, 8.722982  
6792, 150438, 3490.4741, 8.722827  
6793, 150650, 3490.4122, 8.722672  
6794, 150688, 3490.3503, 8.722517  
6795, 150626, 3490.2883, 8.722363  
6796, 150464, 3490.2264, 8.722208  
6797, 150150, 3490.1645, 8.722053  
6798, 149698, 3490.1026, 8.721898  
6799, 149140, 3490.0406, 8.721744  
6800, 148464, 3489.9787, 8.721589  
6801, 147596, 3489.9168, 8.721434  
6802, 146550, 3489.8548, 8.721279  
6803, 145550, 3489.7929, 8.721125  
6804, 144896, 3489.7310, 8.720970  
6805, 144730, 3489.6691, 8.720815  
6806, 144898, 3489.6071, 8.720660  
6807, 145134, 3489.5452, 8.720506  
6808, 145356, 3489.4833, 8.720351  
6809, 145740, 3489.4214, 8.720196  
6810, 146448, 3489.3594, 8.720041  
6811, 147332, 3489.2975, 8.719887  
6812, 147956, 3489.2356, 8.719732  
6813, 147968, 3489.1737, 8.719577



7042, 149850, 3474.9924, 8.684138  
7043, 149410, 3474.9305, 8.683983  
7044, 149054, 3474.8685, 8.683828  
7045, 148906, 3474.8066, 8.683673  
7046, 148954, 3474.7447, 8.683519  
7047, 149116, 3474.6828, 8.683364  
7048, 149300, 3474.6208, 8.683209  
7049, 149412, 3474.5589, 8.683054  
7050, 149368, 3474.4970, 8.682900  
7051, 149146, 3474.4350, 8.682745  
7052, 148854, 3474.3731, 8.682590  
7053, 148694, 3474.3112, 8.682435  
7054, 148796, 3474.2493, 8.682280  
7055, 149082, 3474.1873, 8.682126  
7056, 149312, 3474.1254, 8.681971  
7057, 149300, 3474.0635, 8.681816  
7058, 149134, 3474.0016, 8.681661  
7059, 149030, 3473.9396, 8.681507  
7060, 149170, 3473.8777, 8.681352  
7061, 149442, 3473.8158, 8.681197  
7062, 149536, 3473.7539, 8.681042  
7063, 149218, 3473.6919, 8.680888  
7064, 148530, 3473.6300, 8.680733  
7065, 147752, 3473.5681, 8.680578  
7066, 147178, 3473.5061, 8.680423  
7067, 146976, 3473.4442, 8.680269  
7068, 147158, 3473.3823, 8.680114  
7069, 147640, 3473.3204, 8.679959  
7070, 148248, 3473.2584, 8.679804  
7071, 148732, 3473.1965, 8.679650  
7072, 148856, 3473.1346, 8.679495  
7073, 148602, 3473.0727, 8.679340  
7074, 148240, 3473.0107, 8.679185  
7075, 148140, 3472.9488, 8.679031  
7076, 148452, 3472.8869, 8.678876  
7077, 148928, 3472.8249, 8.678721  
7078, 149140, 3472.7630, 8.678566  
7079, 148898, 3472.7011, 8.678412  
7080, 148464, 3472.6392, 8.678257  
7081, 148330, 3472.5772, 8.678102  
7082, 148776, 3472.5153, 8.677947  
7083, 149640, 3472.4534, 8.677793  
7084, 150466, 3472.3915, 8.677638  
7085, 150918, 3472.3295, 8.677483  
7086, 150938, 3472.2676, 8.677328  
7087, 150660, 3472.2057, 8.677173  
7088, 150180, 3472.1438, 8.677019  
7089, 149502, 3472.0818, 8.676864  
7090, 148638, 3472.0199, 8.676709  
7091, 147740, 3471.9580, 8.676554  
7092, 147004, 3471.8960, 8.676400  
7093, 146540, 3471.8341, 8.676245  
7094, 146328, 3471.7722, 8.676090  
7095, 146378, 3471.7103, 8.675935  
7096, 146800, 3471.6483, 8.675781  
7097, 147692, 3471.5864, 8.675626  
7098, 148922, 3471.5245, 8.675471  
7099, 150070, 3471.4626, 8.675316  
7100, 150706, 3471.4006, 8.675162  
7101, 150738, 3471.3387, 8.675007  
7102, 150506, 3471.2768, 8.674852  
7103, 150462, 3471.2148, 8.674697  
7104, 150806, 3471.1529, 8.674543  
7105, 151362, 3471.0910, 8.674388  
7106, 151792, 3471.0291, 8.674233  
7107, 151886, 3470.9671, 8.674078  
7108, 151654, 3470.9052, 8.673924  
7109, 151166, 3470.8433, 8.673769  
7110, 150456, 3470.7814, 8.673614  
7111, 149592, 3470.7194, 8.673459  
7112, 148778, 3470.6575, 8.673305  
7113, 148288, 3470.5956, 8.673150  
7114, 148266, 3470.5337, 8.672995  
7115, 148550, 3470.4717, 8.672840  
7116, 148832, 3470.4098, 8.672686  
7117, 148952, 3470.3479, 8.672531  
7118, 149052, 3470.2859, 8.672376  
7119, 149382, 3470.2240, 8.672221  
7120, 149986, 3470.1621, 8.672066  
7121, 150616, 3470.1002, 8.671912  
7122, 150946, 3470.0382, 8.671757  
7123, 150882, 3469.9763, 8.671602  
7124, 150608, 3469.9144, 8.671447  
7125, 150370, 3469.8525, 8.671293  
7126, 150260, 3469.7905, 8.671138  
7127, 150216, 3469.7286, 8.670983  
7128, 150196, 3469.6667, 8.670828  
7129, 150246, 3469.6047, 8.670674  
7130, 150394, 3469.5428, 8.670519  
7131, 150508, 3469.4809, 8.670364  
7132, 150378, 3469.4190, 8.670209  
7133, 149952, 3469.3570, 8.670055  
7134, 149434, 3469.2951, 8.669900  
7135, 149106, 3469.2332, 8.669745  
7136, 149022, 3469.1713, 8.669590  
7137, 148930, 3469.1093, 8.669436  
7138, 148564, 3469.0474, 8.669281  
7139, 147958, 3468.9855, 8.669126  
7140, 147458, 3468.9236, 8.668971  
7141, 147338, 3468.8616, 8.668817  
7142, 147528, 3468.7997, 8.668662  
7143, 147674, 3468.7378, 8.668507  
7144, 147562, 3468.6758, 8.668352  
7145, 147356, 3468.6139, 8.668198  
7146, 147440, 3468.5520, 8.668043  
7147, 147970, 3468.4901, 8.667888  
7148, 148700, 3468.4281, 8.667733  
7149, 149200, 3468.3662, 8.667579  
7150, 149306, 3468.3043, 8.667424  
7151, 149222, 3468.2424, 8.667269  
7152, 149244, 3468.1804, 8.667114  
7153, 149404, 3468.1185, 8.666959  
7154, 149454, 3468.0566, 8.666805  
7155, 149164, 3467.9946, 8.666650  
7156, 148620, 3467.9327, 8.666495  
7157, 148150, 3467.8708, 8.666340  
7158, 148012, 3467.8089, 8.666186  
7159, 148186, 3467.7469, 8.666031  
7160, 148450, 3467.6850, 8.665876  
7161, 148618, 3467.6231, 8.665721  
7162, 148638, 3467.5612, 8.665567  
7163, 148482, 3467.4992, 8.665412  
7164, 148092, 3467.4373, 8.665257  
7165, 147462, 3467.3754, 8.665102  
7166, 146638, 3467.3135, 8.664948  
7167, 146626, 3467.2515, 8.664793  
7168, 147084, 3467.1896, 8.664638  
7169, 148034, 3467.1277, 8.664483  
7170, 148954, 3467.0657, 8.664329  
7171, 149390, 3467.0038, 8.664174  
7172, 149280, 3466.9419, 8.664019  
7173, 148926, 3466.8800, 8.663864  
7174, 148616, 3466.8180, 8.663710  
7175, 148410, 3466.7561, 8.663555  
7176, 148208, 3466.6942, 8.663400  
7177, 148068, 3466.6323, 8.663245  
7178, 148216, 3466.5703, 8.663091  
7179, 148808, 3466.5084, 8.662936  
7180, 149670, 3466.4465, 8.662781  
7181, 150372, 3466.3846, 8.662626  
7182, 150614, 3466.3226, 8.662472  
7183, 150492, 3466.2607, 8.662317  
7184, 150396, 3466.1988, 8.662162  
7185, 150594, 3466.1368, 8.662007  
7186, 150998, 3466.0749, 8.661852  
7187, 151322, 3466.0130, 8.661698  
7188, 151442, 3465.9511, 8.661543  
7189, 151512, 3465.8891, 8.661388  
7190, 151756, 3465.8272, 8.661233  
7191, 152176, 3465.7653, 8.661079  
7192, 152514, 3465.7034, 8.660924  
7193, 152534, 3465.6414, 8.660769  
7194, 152266, 3465.5795, 8.660614  
7195, 151972, 3465.5176, 8.660460  
7196, 151824, 3465.4556, 8.660305  
7197, 151754, 3465.3937, 8.660150  
7198, 151534, 3465.3318, 8.659995  
7199, 151040, 3465.2699, 8.659841  
7200, 150388, 3465.2079, 8.659686  
7201, 149814, 3465.1460, 8.659531  
7202, 149504, 3465.0841, 8.659376  
7203, 149492, 3465.0222, 8.659222  
7204, 149722, 3464.9602, 8.659067  
7205, 150100, 3464.8983, 8.658912  
7206, 150500, 3464.8364, 8.658757  
7207, 150734, 3464.7745, 8.658603  
7208, 150666, 3464.7125, 8.658448  
7209, 150336, 3464.6506, 8.658293  
7210, 149962, 3464.5887, 8.658138  
7211, 149772, 3464.5267, 8.657984  
7212, 149850, 3464.4648, 8.657829  
7213, 150100, 3464.4029, 8.657674  
7214, 150404, 3464.3410, 8.657519  
7215, 150720, 3464.2790, 8.657365  
7216, 151040, 3464.2171, 8.657210  
7217, 151260, 3464.1552, 8.657055  
7218, 151220, 3464.0933, 8.656900  
7219, 150910, 3464.0313, 8.656745  
7220, 150572, 3463.9694, 8.656591  
7221, 150514, 3463.9075, 8.656436  
7222, 150770, 3463.8455, 8.656281  
7223, 150960, 3463.7836, 8.656126  
7224, 150652, 3463.7217, 8.655972  
7225, 149838, 3463.6598, 8.655817  
7226, 149068, 3463.5978, 8.655662  
7227, 148974, 3463.5359, 8.655507  
7228, 149668, 3463.4740, 8.655353  
7229, 150606, 3463.4121, 8.655198  
7230, 151108, 3463.3501, 8.655043  
7231, 150976, 3463.2882, 8.654888  
7232, 150592, 3463.2263, 8.654734  
7233, 150442, 3463.1644, 8.654579  
7234, 150600, 3463.1024, 8.654424  
7235, 150762, 3463.0405, 8.654269  
7236, 150718, 3462.9786, 8.654115  
7237, 150730, 3462.9166, 8.653960  
7238, 151238, 3462.8547, 8.653805  
7239, 152290, 3462.7928, 8.653650  
7240, 153328, 3462.7309, 8.653496  
7241, 153620, 3462.6689, 8.653341  
7242, 152958, 3462.6070, 8.653186  
7243, 151854, 3462.5451, 8.653031  
7244, 151068, 3462.4832, 8.652877  
7245, 150912, 3462.4212, 8.652722  
7246, 151090, 3462.3593, 8.652567  
7247, 151120, 3462.2974, 8.652412  
7248, 150908, 3462.2354, 8.652257  
7249, 150780, 3462.1735, 8.652103  
7250, 151088, 3462.1116, 8.651948  
7251, 151774, 3462.0497, 8.651793  
7252, 152470, 3461.9877, 8.651638  
7253, 152854, 3461.9258, 8.651484  
7254, 152932, 3461.8639, 8.651329  
7255, 152932, 3461.8020, 8.651174  
7256, 152982, 3461.7400, 8.651019  
7257, 152980, 3461.6781, 8.650865  
7258, 152754, 3461.6162, 8.650710  
7259, 152256, 3461.5543, 8.650555  
7260, 151590, 3461.4923, 8.650400  
7261, 150858, 3461.4304, 8.650246  
7262, 150106, 3461.3685, 8.650091  
7263, 149402, 3461.3065, 8.649936  
7264, 148932, 3461.2446, 8.649781  
7265, 148878, 3461.1827, 8.649627  
7266, 149242, 3461.1208, 8.649472  
7267, 149774, 3461.0588, 8.649317  
7268, 150188, 3460.9969, 8.649162  
7269, 150434, 3460.9350, 8.649008

7270, 150692, 3460.8731, 8.648853  
7271, 151132, 3460.8111, 8.648698  
7272, 151666, 3460.7492, 8.648543  
7273, 152044, 3460.6873, 8.648389  
7274, 152148, 3460.6253, 8.648234  
7275, 152094, 3460.5634, 8.648079  
7276, 152058, 3460.5015, 8.647924  
7277, 151960, 3460.4396, 8.647770  
7278, 151526, 3460.3776, 8.647615  
7279, 150614, 3460.3157, 8.647460  
7280, 149522, 3460.2538, 8.647305  
7281, 148808, 3460.1919, 8.647150  
7282, 148768, 3460.1299, 8.646996  
7283, 149130, 3460.0680, 8.646841  
7284, 149318, 3460.0061, 8.646686  
7285, 149018, 3459.9442, 8.646531  
7286, 148468, 3459.8822, 8.646377  
7287, 148148, 3459.8203, 8.646222  
7288, 148268, 3459.7584, 8.646067  
7289, 148598, 3459.6964, 8.645912  
7290, 148814, 3459.6345, 8.645758  
7291, 148932, 3459.5726, 8.645603  
7292, 149280, 3459.5107, 8.645448  
7293, 150058, 3459.4487, 8.645293  
7294, 151014, 3459.3868, 8.645139  
7295, 151664, 3459.3249, 8.644984  
7296, 151770, 3459.2630, 8.644829  
7297, 151582, 3459.2010, 8.644674  
7298, 151520, 3459.1391, 8.644520  
7299, 151694, 3459.0772, 8.644365  
7300, 151808, 3459.0152, 8.644210  
7301, 151578, 3458.9533, 8.644055  
7302, 151156, 3458.8914, 8.643901  
7303, 151044, 3458.8295, 8.643746  
7304, 151570, 3458.7675, 8.643591  
7305, 152534, 3458.7056, 8.643436  
7306, 153388, 3458.6437, 8.643282  
7307, 153782, 3458.5818, 8.643127  
7308, 153850, 3458.5198, 8.642972  
7309, 153910, 3458.4579, 8.642817  
7310, 153996, 3458.3960, 8.642663  
7311, 153770, 3458.3341, 8.642508  
7312, 152944, 3458.2721, 8.642353  
7313, 151736, 3458.2102, 8.642198  
7314, 150800, 3458.1483, 8.642043  
7315, 150702, 3458.0863, 8.641889  
7316, 151422, 3458.0244, 8.641734  
7317, 152430, 3457.9625, 8.641579  
7318, 153168, 3457.9006, 8.641424  
7319, 153418, 3457.8386, 8.641270  
7320, 153266, 3457.7767, 8.641115  
7321, 152862, 3457.7148, 8.640960  
7322, 152278, 3457.6529, 8.640805  
7323, 151672, 3457.5909, 8.640651  
7324, 151332, 3457.5290, 8.640496  
7325, 151486, 3457.4671, 8.640341  
7326, 151982, 3457.4051, 8.640186  
7327, 152302, 3457.3432, 8.640032  
7328, 152006, 3457.2813, 8.639877  
7329, 151174, 3457.2194, 8.639722  
7330, 150398, 3457.1574, 8.639567  
7331, 150234, 3457.0955, 8.639413  
7332, 150698, 3457.0336, 8.639258  
7333, 151286, 3456.9717, 8.639103  
7334, 151494, 3456.9097, 8.638948  
7335, 151264, 3456.8478, 8.638794  
7336, 150932, 3456.7859, 8.638639  
7337, 150798, 3456.7240, 8.638484  
7338, 150840, 3456.6620, 8.638329  
7339, 150874, 3456.6001, 8.638175  
7340, 150882, 3456.5382, 8.638020  
7341, 151086, 3456.4762, 8.637865  
7342, 151650, 3456.4143, 8.637710  
7343, 152342, 3456.3524, 8.637556  
7344, 152656, 3456.2905, 8.637401  
7345, 152242, 3456.2285, 8.637246

7346, 151266, 3456.1666, 8.637091  
7347, 150268, 3456.1047, 8.636936  
7348, 149734, 3456.0428, 8.636782  
7349, 149728, 3455.9808, 8.636627  
7350, 150032, 3455.9189, 8.636472  
7351, 150416, 3455.8570, 8.636317  
7352, 150864, 3455.7950, 8.636163  
7353, 151440, 3455.7331, 8.636008  
7354, 152104, 3455.6712, 8.635853  
7355, 152702, 3455.6093, 8.635698  
7356, 153108, 3455.5473, 8.635544  
7357, 153372, 3455.4854, 8.635389  
7358, 153588, 3455.4235, 8.635234  
7359, 153772, 3455.3616, 8.635079  
7360, 153822, 3455.2996, 8.634925  
7361, 153670, 3455.2377, 8.634770  
7362, 153428, 3455.1758, 8.634615  
7363, 153320, 3455.1139, 8.634460  
7364, 153494, 3455.0519, 8.634306  
7365, 153922, 3454.9900, 8.634151  
7366, 154470, 3454.9281, 8.633996  
7367, 155038, 3454.8661, 8.633841  
7368, 155526, 3454.8042, 8.633687  
7369, 155770, 3454.7423, 8.633532  
7370, 155522, 3454.6804, 8.633377  
7371, 154672, 3454.6184, 8.633222  
7372, 153424, 3454.5565, 8.633068  
7373, 152238, 3454.4946, 8.632913  
7374, 151488, 3454.4327, 8.632758  
7375, 151188, 3454.3707, 8.632603  
7376, 151058, 3454.3088, 8.632449  
7377, 150926, 3454.2469, 8.632294  
7378, 150960, 3454.1849, 8.632139  
7379, 151514, 3454.1230, 8.631984  
7380, 152670, 3454.0611, 8.631829  
7381, 154028, 3453.9992, 8.631675  
7382, 154942, 3453.9372, 8.631520  
7383, 155034, 3453.8753, 8.631365  
7384, 154454, 3453.8134, 8.631210  
7385, 153688, 3453.7515, 8.631056  
7386, 153164, 3453.6895, 8.630901  
7387, 152952, 3453.6276, 8.630746  
7388, 152894, 3453.5657, 8.630591  
7389, 152822, 3453.5038, 8.630437  
7390, 152670, 3453.4418, 8.630282  
7391, 152412, 3453.3799, 8.630127  
7392, 152012, 3453.3180, 8.629972  
7393, 151474, 3453.2560, 8.629818  
7394, 150912, 3453.1941, 8.629663  
7395, 150474, 3453.1322, 8.629508  
7396, 150198, 3453.0703, 8.629353  
7397, 149990, 3453.0083, 8.629199  
7398, 149764, 3452.9464, 8.629044  
7399, 149586, 3452.8845, 8.628889  
7400, 149662, 3452.8226, 8.628734  
7401, 150048, 3452.7606, 8.628580  
7402, 150530, 3452.6987, 8.628425  
7403, 150768, 3452.6368, 8.628270  
7404, 150658, 3452.5749, 8.628115  
7405, 150436, 3452.5129, 8.627961  
7406, 150422, 3452.4510, 8.627806  
7407, 150598, 3452.3891, 8.627651  
7408, 150582, 3452.3271, 8.627496  
7409, 150010, 3452.2652, 8.627342  
7410, 149014, 3452.2033, 8.627187  
7411, 148176, 3452.1414, 8.627032  
7412, 148038, 3452.0794, 8.626877  
7413, 148558, 3452.0175, 8.626722  
7414, 149218, 3451.9556, 8.626568  
7415, 149540, 3451.8937, 8.626413  
7416, 149576, 3451.8317, 8.626258  
7417, 149818, 3451.7698, 8.626103  
7418, 150668, 3451.7079, 8.625949  
7419, 152026, 3451.6459, 8.625794  
7420, 153386, 3451.5840, 8.625639  
7421, 154306, 3451.5221, 8.625484

7422, 154698, 3451.4602, 8.625330  
7423, 154696, 3451.3982, 8.625175  
7424, 154350, 3451.3363, 8.625020  
7425, 153556, 3451.2744, 8.624865  
7426, 152286, 3451.2125, 8.624711  
7427, 150788, 3451.1505, 8.624556  
7428, 149510, 3451.0886, 8.624401  
7429, 148770, 3451.0267, 8.624246  
7430, 148530, 3450.9648, 8.624092  
7431, 148568, 3450.9028, 8.623937  
7432, 148772, 3450.8409, 8.623782  
7433, 149252, 3450.7790, 8.623627  
7434, 150014, 3450.7170, 8.623473  
7435, 151018, 3450.6551, 8.623318  
7436, 151922, 3450.5932, 8.623163  
7437, 152492, 3450.5313, 8.623008  
7438, 152766, 3450.4693, 8.622854  
7439, 152988, 3450.4074, 8.622699  
7440, 153288, 3450.3455, 8.622544  
7441, 153552, 3450.2836, 8.622389  
7442, 153564, 3450.2216, 8.622235  
7443, 153246, 3450.1597, 8.622080  
7444, 152738, 3450.0978, 8.621925  
7445, 152264, 3450.0358, 8.621770  
7446, 151966, 3449.9739, 8.621615  
7447, 151900, 3449.9120, 8.621461  
7448, 152124, 3449.8501, 8.621306  
7449, 152668, 3449.7881, 8.621151  
7450, 153400, 3449.7262, 8.620996  
7451, 153994, 3449.6643, 8.620842  
7452, 154070, 3449.6024, 8.620687  
7453, 153520, 3449.5404, 8.620532  
7454, 152598, 3449.4785, 8.620377  
7455, 151710, 3449.4166, 8.620223  
7456, 151076, 3449.3547, 8.620068  
7457, 150602, 3449.2927, 8.619913  
7458, 150106, 3449.2308, 8.619758  
7459, 149596, 3449.1689, 8.619604  
7460, 149316, 3449.1069, 8.619449  
7461, 149486, 3449.0450, 8.619294  
7462, 150100, 3448.9831, 8.619139  
7463, 150920, 3448.9212, 8.618985  
7464, 151724, 3448.8592, 8.618830  
7465, 152412, 3448.7973, 8.618675  
7466, 152882, 3448.7354, 8.618520  
7467, 152918, 3448.6735, 8.618366  
7468, 152278, 3448.6115, 8.618211  
7469, 151004, 3448.5496, 8.618056  
7470, 149578, 3448.4877, 8.617901  
7471, 148668, 3448.4257, 8.617747  
7472, 148626, 3448.3638, 8.617592  
7473, 149238, 3448.3019, 8.617437  
7474, 149946, 3448.2400, 8.617282  
7475, 150392, 3448.1780, 8.617128  
7476, 150652, 3448.1161, 8.616973  
7477, 151016, 3448.0542, 8.616818  
7478, 151574, 3447.9923, 8.616663  
7479, 152068, 3447.9303, 8.616508  
7480, 152192, 3447.8684, 8.616354  
7481, 151954, 3447.8065, 8.616199  
7482, 151728, 3447.7446, 8.616044  
7483, 151888, 3447.6826, 8.615889  
7484, 152464, 3447.6207, 8.615735  
7485, 153118, 3447.5588, 8.615580  
7486, 153432, 3447.4968, 8.615425  
7487, 153258, 3447.4349, 8.615270  
7488, 152718, 3447.3730, 8.615116  
7489, 152028, 3447.3111, 8.614961  
7490, 151316, 3447.2491, 8.614806  
7491, 150634, 3447.1872, 8.614651  
7492, 150034, 3447.1253, 8.614497  
7493, 149564, 3447.0634, 8.614342  
7494, 149204, 3447.0014, 8.614187  
7495, 148890, 3446.9395, 8.614032  
7496, 148604, 3446.8776, 8.613878  
7497, 148452, 3446.8156, 8.613723



7498, 148594, 3446.7537, 8.613568  
7499, 149016, 3446.6918, 8.613413  
7500, 149462, 3446.6299, 8.613259  
7501, 149660, 3446.5679, 8.613104  
7502, 149602, 3446.5060, 8.612949  
7503, 149594, 3446.4441, 8.612794  
7504, 150016, 3446.3822, 8.612640  
7505, 150922, 3446.3202, 8.612485  
7506, 151956, 3446.2583, 8.612330  
7507, 152618, 3446.1964, 8.612175  
7508, 152634, 3446.1345, 8.612021  
7509, 152118, 3446.0725, 8.611866  
7510, 151414, 3446.0106, 8.611711  
7511, 150798, 3445.9487, 8.611556  
7512, 150382, 3445.8867, 8.611401  
7513, 150130, 3445.8248, 8.611247  
7514, 149988, 3445.7629, 8.611092  
7515, 149894, 3445.7010, 8.610937  
7516, 149770, 3445.6390, 8.610782  
7517, 149550, 3445.5771, 8.610628  
7518, 149260, 3445.5152, 8.610473  
7519, 149034, 3445.4533, 8.610318  
7520, 149028, 3445.3913, 8.610163  
7521, 149274, 3445.3294, 8.610009  
7522, 149682, 3445.2675, 8.609854  
7523, 150104, 3445.2055, 8.609699  
7524, 150442, 3445.1436, 8.609544  
7525, 150612, 3445.0817, 8.609390  
7526, 150528, 3445.0198, 8.609235  
7527, 150144, 3444.9578, 8.609080  
7528, 149594, 3444.8959, 8.608925  
7529, 149198, 3444.8340, 8.608771  
7530, 149232, 3444.7721, 8.608616  
7531, 149644, 3444.7101, 8.608461  
7532, 149996, 3444.6482, 8.608306  
7533, 149818, 3444.5863, 8.608152  
7534, 149054, 3444.5244, 8.607997  
7535, 148172, 3444.4624, 8.607842  
7536, 147800, 3444.4005, 8.607687  
7537, 148190, 3444.3386, 8.607533  
7538, 149060, 3444.2766, 8.607378  
7539, 149894, 3444.2147, 8.607223  
7540, 150446, 3444.1528, 8.607068  
7541, 150844, 3444.0909, 8.606913  
7542, 151334, 3444.0289, 8.606759  
7543, 151886, 3443.9670, 8.606604  
7544, 152210, 3443.9051, 8.606449  
7545, 152058, 3443.8432, 8.606294  
7546, 151514, 3443.7812, 8.606140  
7547, 150954, 3443.7193, 8.605985  
7548, 150666, 3443.6574, 8.605830  
7549, 150662, 3443.5954, 8.605675  
7550, 150730, 3443.5335, 8.605521  
7551, 150750, 3443.4716, 8.605366  
7552, 150788, 3443.4097, 8.605211  
7553, 150976, 3443.3477, 8.605056  
7554, 151288, 3443.2858, 8.604902  
7555, 151528, 3443.2239, 8.604747  
7556, 151508, 3443.1620, 8.604592  
7557, 151196, 3443.1000, 8.604437  
7558, 150690, 3443.0381, 8.604283  
7559, 150102, 3442.9762, 8.604128  
7560, 149530, 3442.9143, 8.603973  
7561, 149150, 3442.8523, 8.603818  
7562, 149236, 3442.7904, 8.603664  
7563, 150022, 3442.7285, 8.603509  
7564, 151422, 3442.6665, 8.603354  
7565, 152966, 3442.6046, 8.603199  
7566, 154088, 3442.5427, 8.603045  
7567, 154498, 3442.4808, 8.602890  
7568, 154340, 3442.4188, 8.602735  
7569, 153972, 3442.3569, 8.602580  
7570, 153644, 3442.2950, 8.602426  
7571, 153336, 3442.2331, 8.602271  
7572, 152914, 3442.1711, 8.602116  
7573, 152330, 3442.1092, 8.601961  
7574, 151736, 3442.0473, 8.601806  
7575, 151356, 3441.9853, 8.601652  
7576, 151366, 3441.9234, 8.601497  
7577, 151844, 3441.8615, 8.601342  
7578, 152730, 3441.7996, 8.601187  
7579, 153826, 3441.7376, 8.601033  
7580, 154782, 3441.6757, 8.600878  
7581, 155242, 3441.6138, 8.600723  
7582, 155084, 3441.5519, 8.600568  
7583, 154514, 3441.4899, 8.600414  
7584, 153884, 3441.4280, 8.600259  
7585, 153370, 3441.3661, 8.600104  
7586, 152820, 3441.3042, 8.599949  
7587, 151986, 3441.2422, 8.599795  
7588, 150930, 3441.1803, 8.599640  
7589, 150066, 3441.1184, 8.599485  
7590, 149830, 3441.0564, 8.599330  
7591, 150178, 3440.9945, 8.599176  
7592, 150576, 3440.9326, 8.599021  
7593, 150458, 3440.8707, 8.598866  
7594, 149800, 3440.8087, 8.598711  
7595, 149146, 3440.7468, 8.598557  
7596, 149092, 3440.6849, 8.598402  
7597, 149708, 3440.6230, 8.598247  
7598, 150536, 3440.5610, 8.598092  
7599, 151072, 3440.4991, 8.597938  
7600, 151276, 3440.4372, 8.597783  
7601, 151508, 3440.3753, 8.597628  
7602, 152068, 3440.3133, 8.597473  
7603, 152780, 3440.2514, 8.597319  
7604, 153174, 3440.1895, 8.597164  
7605, 152954, 3440.1275, 8.597009  
7606, 152318, 3440.0656, 8.596854  
7607, 151786, 3440.0037, 8.596699  
7608, 151724, 3439.9418, 8.596545  
7609, 152110, 3439.8798, 8.596390  
7610, 152634, 3439.8179, 8.596235  
7611, 153036, 3439.7560, 8.596080  
7612, 153230, 3439.6941, 8.595926  
7613, 153246, 3439.6321, 8.595771  
7614, 153100, 3439.5702, 8.595616  
7615, 152804, 3439.5083, 8.595461  
7616, 152458, 3439.4463, 8.595307  
7617, 152224, 3439.3844, 8.595152  
7618, 152162, 3439.3225, 8.594997  
7619, 152136, 3439.2606, 8.594842  
7620, 151950, 3439.1986, 8.594688  
7621, 151536, 3439.1367, 8.594533  
7622, 151062, 3439.0748, 8.594378  
7623, 150700, 3439.0129, 8.594223  
7624, 150462, 3438.9509, 8.594069  
7625, 150180, 3438.8890, 8.593914  
7626, 149768, 3438.8271, 8.593759  
7627, 149402, 3438.7652, 8.593604  
7628, 149358, 3438.7032, 8.593450  
7629, 149732, 3438.6413, 8.593295  
7630, 150286, 3438.5794, 8.593140  
7631, 150670, 3438.5174, 8.592985  
7632, 150796, 3438.4555, 8.592831  
7633, 150874, 3438.3936, 8.592676  
7634, 151136, 3438.3317, 8.592521  
7635, 151498, 3438.2697, 8.592366  
7636, 151600, 3438.2078, 8.592212  
7637, 151218, 3438.1459, 8.592057  
7638, 150574, 3438.0840, 8.591902  
7639, 150192, 3438.0220, 8.591747  
7640, 150418, 3437.9601, 8.591592  
7641, 151058, 3437.8982, 8.591438  
7642, 151546, 3437.8362, 8.591283  
7643, 151468, 3437.7743, 8.591128  
7644, 150918, 3437.7124, 8.590973  
7645, 150352, 3437.6505, 8.590819  
7646, 150158, 3437.5885, 8.590664  
7647, 150354, 3437.5266, 8.590509  
7648, 150688, 3437.4647, 8.590354  
7649, 150932, 3437.4028, 8.590200  
7650, 151026, 3437.3408, 8.590045  
7651, 151048, 3437.2789, 8.589890  
7652, 151040, 3437.2170, 8.589735  
7653, 150996, 3437.1551, 8.589581  
7654, 150930, 3437.0931, 8.589426  
7655, 150922, 3437.0312, 8.589271  
7656, 151006, 3436.9693, 8.589116  
7657, 151102, 3436.9073, 8.588962  
7658, 151058, 3436.8454, 8.588807  
7659, 150840, 3436.7835, 8.588652  
7660, 150602, 3436.7216, 8.588497  
7661, 150554, 3436.6596, 8.588343  
7662, 150746, 3436.5977, 8.588188  
7663, 151010, 3436.5358, 8.588033  
7664, 151116, 3436.4739, 8.587878  
7665, 150992, 3436.4119, 8.587724  
7666, 150754, 3436.3500, 8.587569  
7667, 150558, 3436.2881, 8.587414  
7668, 150454, 3436.2261, 8.587259  
7669, 150370, 3436.1642, 8.587105  
7670, 150280, 3436.1023, 8.586950  
7671, 150246, 3436.0404, 8.586795  
7672, 150374, 3435.9784, 8.586640  
7673, 150662, 3435.9165, 8.586485  
7674, 151004, 3435.8546, 8.586331  
7675, 151318, 3435.7927, 8.586176  
7676, 151654, 3435.7307, 8.586021  
7677, 152134, 3435.6688, 8.585866  
7678, 152780, 3435.6069, 8.585712  
7679, 153448, 3435.5450, 8.585557  
7680, 153898, 3435.4830, 8.585402  
7681, 153982, 3435.4211, 8.585247  
7682, 153718, 3435.3592, 8.585093  
7683, 153252, 3435.2972, 8.584938  
7684, 152772, 3435.2353, 8.584783  
7685, 152472, 3435.1734, 8.584628  
7686, 152530, 3435.1115, 8.584474  
7687, 153012, 3435.0495, 8.584319  
7688, 153740, 3434.9876, 8.584164  
7689, 154298, 3434.9257, 8.584009  
7690, 154256, 3434.8638, 8.583855  
7691, 153488, 3434.8018, 8.583700  
7692, 152320, 3434.7399, 8.583545  
7693, 151278, 3434.6780, 8.583390  
7694, 150702, 3434.6160, 8.583236  
7695, 150534, 3434.5541, 8.583081  
7696, 150500, 3434.4922, 8.582926  
7697, 150418, 3434.4303, 8.582771  
7698, 150394, 3434.3683, 8.582617  
7699, 150630, 3434.3064, 8.582462  
7700, 151178, 3434.2445, 8.582307  
7701, 151840, 3434.1826, 8.582152  
7702, 152376, 3434.1206, 8.581998  
7703, 152702, 3434.0587, 8.581843  
7704, 152920, 3433.9968, 8.581688  
7705, 153170, 3433.9349, 8.581533  
7706, 153454, 3433.8729, 8.581378  
7707, 153712, 3433.8110, 8.581224  
7708, 153932, 3433.7491, 8.581069  
7709, 154228, 3433.6871, 8.580914  
7710, 154678, 3433.6252, 8.580759  
7711, 155202, 3433.5633, 8.580605  
7712, 155576, 3433.5014, 8.580450  
7713, 155626, 3433.4394, 8.580295  
7714, 155410, 3433.3775, 8.580140  
7715, 155140, 3433.3156, 8.579986  
7716, 155028, 3433.2537, 8.579831  
7717, 155098, 3433.1917, 8.579676  
7718, 155214, 3433.1298, 8.579521  
7719, 155248, 3433.0679, 8.579367  
7720, 155152, 3433.0059, 8.579212  
7721, 154980, 3432.9440, 8.579057  
7722, 154794, 3432.8821, 8.578902  
7723, 154666, 3432.8202, 8.578748  
7724, 154630, 3432.7582, 8.578593  
7725, 154678, 3432.6963, 8.578438



7954, 157904, 3418.5151, 8.542999  
7955, 158310, 3418.4531, 8.542844  
7956, 158160, 3418.3912, 8.542689  
7957, 157406, 3418.3293, 8.542534  
7958, 156330, 3418.2673, 8.542380  
7959, 155326, 3418.2054, 8.542225  
7960, 154598, 3418.1435, 8.542070  
7961, 154124, 3418.0816, 8.541915  
7962, 153808, 3418.0196, 8.541761  
7963, 153624, 3417.9577, 8.541606  
7964, 153578, 3417.8958, 8.541451  
7965, 153612, 3417.8338, 8.541296  
7966, 153556, 3417.7719, 8.541141  
7967, 153306, 3417.7100, 8.540987  
7968, 152896, 3417.6481, 8.540832  
7969, 152502, 3417.5861, 8.540677  
7970, 152286, 3417.5242, 8.540522  
7971, 152326, 3417.4623, 8.540368  
7972, 152628, 3417.4004, 8.540213  
7973, 153190, 3417.3384, 8.540058  
7974, 153930, 3417.2765, 8.539903  
7975, 154628, 3417.2146, 8.539749  
7976, 154970, 3417.1527, 8.539594  
7977, 154804, 3417.0907, 8.539439  
7978, 154310, 3417.0288, 8.539284  
7979, 153878, 3416.9669, 8.539130  
7980, 153768, 3416.9050, 8.538975  
7981, 153840, 3416.8430, 8.538820  
7982, 153690, 3416.7811, 8.538665  
7983, 153088, 3416.7192, 8.538511  
7984, 152262, 3416.6572, 8.538356  
7985, 151734, 3416.5953, 8.538201  
7986, 151852, 3416.5334, 8.538046  
7987, 152484, 3416.4715, 8.537892  
7988, 153196, 3416.4095, 8.537737  
7989, 153632, 3416.3476, 8.537582  
7990, 153766, 3416.2857, 8.537427  
7991, 153748, 3416.2238, 8.537273  
7992, 153642, 3416.1618, 8.537118  
7993, 153382, 3416.0999, 8.536963  
7994, 152936, 3416.0380, 8.536808  
7995, 152514, 3415.9760, 8.536654  
7996, 152398, 3415.9141, 8.536499  
7997, 152674, 3415.8522, 8.536344  
7998, 153090, 3415.7903, 8.536189  
7999, 153278, 3415.7283, 8.536034  
8000, 153104, 3415.6664, 8.535880  
8001, 152780, 3415.6045, 8.535725  
8002, 152620, 3415.5426, 8.535570  
8003, 152730, 3415.4806, 8.535415  
8004, 152982, 3415.4187, 8.535261  
8005, 153224, 3415.3568, 8.535106  
8006, 153476, 3415.2949, 8.534951  
8007, 153858, 3415.2329, 8.534796  
8008, 154354, 3415.1710, 8.534642  
8009, 154776, 3415.1091, 8.534487  
8010, 154944, 3415.0471, 8.534332  
8011, 154906, 3414.9852, 8.534177  
8012, 154888, 3414.9233, 8.534023  
8013, 154998, 3414.8614, 8.533868  
8014, 155046, 3414.7994, 8.533713  
8015, 154712, 3414.7375, 8.533558  
8016, 153896, 3414.6756, 8.533404  
8017, 152914, 3414.6137, 8.533249  
8018, 152246, 3414.5517, 8.533094  
8019, 152118, 3414.4898, 8.532939  
8020, 152350, 3414.4279, 8.532785  
8021, 152556, 3414.3659, 8.532630  
8022, 152556, 3414.3040, 8.532475  
8023, 152448, 3414.2421, 8.532320  
8024, 152416, 3414.1802, 8.532166  
8025, 152506, 3414.1182, 8.532011  
8026, 152592, 3414.0563, 8.531856  
8027, 152588, 3413.9944, 8.531701  
8028, 152578, 3413.9325, 8.531547  
8029, 152710, 3413.8705, 8.531392

8030, 152986, 3413.8086, 8.531237  
8031, 153248, 3413.7467, 8.531082  
8032, 153312, 3413.6848, 8.530927  
8033, 153136, 3413.6228, 8.530773  
8034, 152802, 3413.5609, 8.530618  
8035, 152370, 3413.4990, 8.530463  
8036, 151854, 3413.4370, 8.530308  
8037, 151304, 3413.3751, 8.530154  
8038, 150936, 3413.3132, 8.529999  
8039, 151010, 3413.2513, 8.529844  
8040, 151568, 3413.1893, 8.529689  
8041, 152314, 3413.1274, 8.529535  
8042, 152826, 3413.0655, 8.529380  
8043, 152898, 3413.0036, 8.529225  
8044, 152700, 3412.9416, 8.529070  
8045, 152546, 3412.8797, 8.528916  
8046, 152532, 3412.8178, 8.528761  
8047, 152478, 3412.7559, 8.528606  
8048, 152198, 3412.6939, 8.528451  
8049, 151778, 3412.6320, 8.528297  
8050, 151548, 3412.5701, 8.528142  
8051, 151744, 3412.5081, 8.527987  
8052, 152224, 3412.4462, 8.527832  
8053, 152604, 3412.3843, 8.527678  
8054, 152642, 3412.3224, 8.527523  
8055, 152426, 3412.2604, 8.527368  
8056, 152220, 3412.1985, 8.527213  
8057, 152098, 3412.1366, 8.527059  
8058, 151858, 3412.0747, 8.526904  
8059, 151310, 3412.0127, 8.526749  
8060, 150592, 3411.9508, 8.526594  
8061, 150130, 3411.8889, 8.526440  
8062, 150278, 3411.8269, 8.526285  
8063, 150936, 3411.7650, 8.526130  
8064, 151644, 3411.7031, 8.525975  
8065, 151998, 3411.6412, 8.525820  
8066, 152010, 3411.5792, 8.525666  
8067, 152026, 3411.5173, 8.525511  
8068, 152326, 3411.4554, 8.525356  
8069, 152882, 3411.3935, 8.525201  
8070, 153398, 3411.3315, 8.525047  
8071, 153644, 3411.2696, 8.524892  
8072, 153654, 3411.2077, 8.524737  
8073, 153632, 3411.1458, 8.524582  
8074, 153734, 3411.0838, 8.524428  
8075, 153934, 3411.0219, 8.524273  
8076, 154104, 3410.9600, 8.524118  
8077, 154154, 3410.8980, 8.523963  
8078, 154082, 3410.8361, 8.523809  
8079, 153916, 3410.7742, 8.523654  
8080, 153720, 3410.7123, 8.523499  
8081, 153564, 3410.6503, 8.523344  
8082, 153558, 3410.5884, 8.523190  
8083, 153796, 3410.5265, 8.523035  
8084, 154242, 3410.4646, 8.522880  
8085, 154734, 3410.4026, 8.522725  
8086, 155058, 3410.3407, 8.522571  
8087, 155088, 3410.2788, 8.522416  
8088, 154820, 3410.2168, 8.522261  
8089, 154354, 3410.1549, 8.522106  
8090, 153828, 3410.0930, 8.521952  
8091, 153414, 3410.0311, 8.521797  
8092, 153266, 3409.9691, 8.521642  
8093, 153444, 3409.9072, 8.521487  
8094, 153810, 3409.8453, 8.521333  
8095, 154102, 3409.7834, 8.521178  
8096, 154096, 3409.7214, 8.521023  
8097, 153824, 3409.6595, 8.520868  
8098, 153554, 3409.5976, 8.520713  
8099, 153552, 3409.5357, 8.520559  
8100, 153860, 3409.4737, 8.520404  
8101, 154264, 3409.4118, 8.520249  
8102, 154520, 3409.3499, 8.520094  
8103, 154530, 3409.2879, 8.519940  
8104, 154378, 3409.2260, 8.519785  
8105, 154144, 3409.1641, 8.519630

8106, 153818, 3409.1022, 8.519475  
8107, 153352, 3409.0402, 8.519321  
8108, 152772, 3408.9783, 8.519166  
8109, 152196, 3408.9164, 8.519011  
8110, 151698, 3408.8545, 8.518856  
8111, 151232, 3408.7925, 8.518702  
8112, 150736, 3408.7306, 8.518547  
8113, 150306, 3408.6687, 8.518392  
8114, 150224, 3408.6067, 8.518237  
8115, 150748, 3408.5448, 8.518083  
8116, 151854, 3408.4829, 8.517928  
8117, 153200, 3408.4210, 8.517773  
8118, 154416, 3408.3590, 8.517618  
8119, 155388, 3408.2971, 8.517464  
8120, 156236, 3408.2352, 8.517309  
8121, 157050, 3408.1733, 8.517154  
8122, 157674, 3408.1113, 8.516999  
8123, 157814, 3408.0494, 8.516845  
8124, 157356, 3407.9875, 8.516690  
8125, 156572, 3407.9256, 8.516535  
8126, 155954, 3407.8636, 8.516380  
8127, 155808, 3407.8017, 8.516225  
8128, 156098, 3407.7398, 8.516071  
8129, 156546, 3407.6778, 8.515916  
8130, 156918, 3407.6159, 8.515761  
8131, 157146, 3407.5540, 8.515606  
8132, 157232, 3407.4921, 8.515452  
8133, 157100, 3407.4301, 8.515297  
8134, 156668, 3407.3682, 8.515142  
8135, 155996, 3407.3063, 8.514987  
8136, 155340, 3407.2444, 8.514833  
8137, 154984, 3407.1824, 8.514678  
8138, 154996, 3407.1205, 8.514523  
8139, 155172, 3407.0586, 8.514368  
8140, 155252, 3406.9966, 8.514214  
8141, 155114, 3406.9347, 8.514059  
8142, 154844, 3406.8728, 8.513904  
8143, 154544, 3406.8109, 8.513749  
8144, 154250, 3406.7489, 8.513595  
8145, 153970, 3406.6870, 8.513440  
8146, 153804, 3406.6251, 8.513285  
8147, 153938, 3406.5632, 8.513130  
8148, 154468, 3406.5012, 8.512976  
8149, 155238, 3406.4393, 8.512821  
8150, 155928, 3406.3774, 8.512666  
8151, 156262, 3406.3155, 8.512511  
8152, 156194, 3406.2535, 8.512357  
8153, 155864, 3406.1916, 8.512202  
8154, 155432, 3406.1297, 8.512047  
8155, 154984, 3406.0677, 8.511892  
8156, 154588, 3406.0058, 8.511738  
8157, 154322, 3405.9439, 8.511583  
8158, 154232, 3405.8820, 8.511428  
8159, 154230, 3405.8200, 8.511273  
8160, 154160, 3405.7581, 8.511118  
8161, 153984, 3405.6962, 8.510964  
8162, 153908, 3405.6343, 8.510809  
8163, 154222, 3405.5723, 8.510654  
8164, 154960, 3405.5104, 8.510499  
8165, 155732, 3405.4485, 8.510345  
8166, 155996, 3405.3865, 8.510190  
8167, 155526, 3405.3246, 8.510035  
8168, 154644, 3405.2627, 8.509880  
8169, 153934, 3405.2008, 8.509726  
8170, 153762, 3405.1388, 8.509571  
8171, 154000, 3405.0769, 8.509416  
8172, 154298, 3405.0150, 8.509261  
8173, 154478, 3404.9531, 8.509107  
8174, 154670, 3404.8911, 8.508952  
8175, 155044, 3404.8292, 8.508797  
8176, 155514, 3404.7673, 8.508642  
8177, 155750, 3404.7054, 8.508488  
8178, 155560, 3404.6434, 8.508333  
8179, 155090, 3404.5815, 8.508178  
8180, 154714, 3404.5196, 8.508023  
8181, 154624, 3404.4576, 8.507869





8638, 155928, 3376.1570, 8.437144  
8639, 156260, 3376.0951, 8.436990  
8640, 156482, 3376.0332, 8.436835  
8641, 156820, 3375.9713, 8.436680  
8642, 157212, 3375.9093, 8.436525  
8643, 157384, 3375.8474, 8.436371  
8644, 157182, 3375.7855, 8.436216  
8645, 156826, 3375.7236, 8.436061  
8646, 156682, 3375.6616, 8.435906  
8647, 156882, 3375.5997, 8.435752  
8648, 157184, 3375.5378, 8.435597  
8649, 157262, 3375.4759, 8.435442  
8650, 157058, 3375.4139, 8.435287  
8651, 156826, 3375.3520, 8.435132  
8652, 156798, 3375.2901, 8.434978  
8653, 156918, 3375.2281, 8.434823  
8654, 156896, 3375.1662, 8.434668  
8655, 156570, 3375.1043, 8.434513  
8656, 156092, 3375.0424, 8.434359  
8657, 155786, 3374.9804, 8.434204  
8658, 155792, 3374.9185, 8.434049  
8659, 155980, 3374.8566, 8.433894  
8660, 156132, 3374.7947, 8.433740  
8661, 156230, 3374.7327, 8.433585  
8662, 156438, 3374.6708, 8.433430  
8663, 156850, 3374.6089, 8.433275  
8664, 157308, 3374.5469, 8.433121  
8665, 157540, 3374.4850, 8.432966  
8666, 157484, 3374.4231, 8.432811  
8667, 157414, 3374.3612, 8.432656  
8668, 157728, 3374.2992, 8.432502  
8669, 158528, 3374.2373, 8.432347  
8670, 159520, 3374.1754, 8.432192  
8671, 160208, 3374.1135, 8.432037  
8672, 160268, 3374.0515, 8.431883  
8673, 159728, 3373.9896, 8.431728  
8674, 158878, 3373.9277, 8.431573  
8675, 158060, 3373.8658, 8.431418  
8676, 157566, 3373.8038, 8.431264  
8677, 157616, 3373.7419, 8.431109  
8678, 158294, 3373.6800, 8.430954  
8679, 159454, 3373.6180, 8.430799  
8680, 160706, 3373.5561, 8.430645  
8681, 161598, 3373.4942, 8.430490  
8682, 161862, 3373.4323, 8.430335  
8683, 161552, 3373.3703, 8.430180  
8684, 160948, 3373.3084, 8.430025  
8685, 160308, 3373.2465, 8.429871  
8686, 159754, 3373.1846, 8.429716  
8687, 159316, 3373.1226, 8.429561  
8688, 159012, 3373.0607, 8.429406  
8689, 158858, 3372.9988, 8.429252  
8690, 158776, 3372.9369, 8.429097  
8691, 158604, 3372.8749, 8.428942  
8692, 158248, 3372.8130, 8.428787  
8693, 157790, 3372.7511, 8.428633  
8694, 157504, 3372.6891, 8.428478  
8695, 157580, 3372.6272, 8.428323  
8696, 157982, 3372.5653, 8.428168  
8697, 158432, 3372.5034, 8.428014  
8698, 158642, 3372.4414, 8.427859  
8699, 158504, 3372.3795, 8.427704  
8700, 158128, 3372.3176, 8.427549  
8701, 157710, 3372.2557, 8.427395  
8702, 157418, 3372.1937, 8.427240  
8703, 157376, 3372.1318, 8.427085  
8704, 157654, 3372.0699, 8.426930  
8705, 158182, 3372.0079, 8.426776  
8706, 158756, 3371.9460, 8.426621  
8707, 159110, 3371.8841, 8.426466  
8708, 159110, 3371.8222, 8.426311  
8709, 158862, 3371.7602, 8.426157  
8710, 158616, 3371.6983, 8.426002  
8711, 158504, 3371.6364, 8.425847  
8712, 158428, 3371.5745, 8.425692  
8713, 158204, 3371.5125, 8.425537  
8714, 157820, 3371.4506, 8.425383  
8715, 157520, 3371.3887, 8.425228  
8716, 157564, 3371.3268, 8.425073  
8717, 157944, 3371.2648, 8.424918  
8718, 158352, 3371.2029, 8.424764  
8719, 158456, 3371.1410, 8.424609  
8720, 158204, 3371.0790, 8.424454  
8721, 157812, 3371.0171, 8.424299  
8722, 157488, 3370.9552, 8.424145  
8723, 157202, 3370.8933, 8.423990  
8724, 156756, 3370.8313, 8.423835  
8725, 156068, 3370.7694, 8.423680  
8726, 155344, 3370.7075, 8.423526  
8727, 154910, 3370.6456, 8.423371  
8728, 154898, 3370.5836, 8.423216  
8729, 155152, 3370.5217, 8.423061  
8730, 155402, 3370.4598, 8.422907  
8731, 155532, 3370.3978, 8.422752  
8732, 155640, 3370.3359, 8.422597  
8733, 155894, 3370.2740, 8.422442  
8734, 156298, 3370.2121, 8.422288  
8735, 156754, 3370.1501, 8.422133  
8736, 157156, 3370.0882, 8.421978  
8737, 157508, 3370.0263, 8.421823  
8738, 157834, 3369.9644, 8.421669  
8739, 158084, 3369.9024, 8.421514  
8740, 158174, 3369.8405, 8.421359  
8741, 158124, 3369.7786, 8.421204  
8742, 158096, 3369.7167, 8.421050  
8743, 158232, 3369.6547, 8.420895  
8744, 158480, 3369.5928, 8.420740  
8745, 158634, 3369.5309, 8.420585  
8746, 158550, 3369.4689, 8.420430  
8747, 158336, 3369.4070, 8.420276  
8748, 158246, 3369.3451, 8.420121  
8749, 158374, 3369.2832, 8.419966  
8750, 158482, 3369.2212, 8.419811  
8751, 158190, 3369.1593, 8.419657  
8752, 157378, 3369.0974, 8.419502  
8753, 156342, 3369.0355, 8.419347  
8754, 155580, 3368.9735, 8.419192  
8755, 155404, 3368.9116, 8.419038  
8756, 155718, 3368.8497, 8.418883  
8757, 156214, 3368.7877, 8.418728  
8758, 156622, 3368.7258, 8.418573  
8759, 156886, 3368.6639, 8.418419  
8760, 157008, 3368.6020, 8.418264  
8761, 156972, 3368.5400, 8.418109  
8762, 156794, 3368.4781, 8.417954  
8763, 156616, 3368.4162, 8.417800  
8764, 156662, 3368.3543, 8.417645  
8765, 157008, 3368.2923, 8.417490  
8766, 157444, 3368.2304, 8.417335  
8767, 157632, 3368.1685, 8.417181  
8768, 157428, 3368.1066, 8.417026  
8769, 157024, 3368.0446, 8.416871  
8770, 156776, 3367.9827, 8.416716  
8771, 156816, 3367.9208, 8.416562  
8772, 157000, 3367.8588, 8.416407  
8773, 157126, 3367.7969, 8.416252  
8774, 157268, 3367.7350, 8.416097  
8775, 157702, 3367.6731, 8.415943  
8776, 158544, 3367.6111, 8.415788  
8777, 159476, 3367.5492, 8.415633  
8778, 159942, 3367.4873, 8.415478  
8779, 159658, 3367.4254, 8.415323  
8780, 158924, 3367.3634, 8.415169  
8781, 158340, 3367.3015, 8.415014  
8782, 158230, 3367.2396, 8.414859  
8783, 158308, 3367.1776, 8.414704  
8784, 157982, 3367.1157, 8.414550  
8785, 156964, 3367.0538, 8.414395  
8786, 155602, 3366.9919, 8.414240  
8787, 154614, 3366.9299, 8.414085  
8788, 154500, 3366.8680, 8.413931  
8789, 155148, 3366.8061, 8.413776  
8790, 156030, 3366.7442, 8.413621  
8791, 156628, 3366.6822, 8.413466  
8792, 156780, 3366.6203, 8.413312  
8793, 156700, 3366.5584, 8.413157  
8794, 156700, 3366.4965, 8.413002  
8795, 156956, 3366.4345, 8.412847  
8796, 157412, 3366.3726, 8.412693  
8797, 157850, 3366.3107, 8.412538  
8798, 158064, 3366.2487, 8.412383  
8799, 158002, 3366.1868, 8.412228  
8800, 157868, 3366.1249, 8.412074  
8801, 157978, 3366.0630, 8.411919  
8802, 158508, 3366.0010, 8.411764  
8803, 159294, 3365.9391, 8.411609  
8804, 159926, 3365.8772, 8.411455  
8805, 160094, 3365.8153, 8.411300  
8806, 159896, 3365.7533, 8.411145  
8807, 159772, 3365.6914, 8.410990  
8808, 160052, 3365.6295, 8.410836  
8809, 160648, 3365.5675, 8.410681  
8810, 161106, 3365.5056, 8.410526  
8811, 161074, 3365.4437, 8.410371  
8812, 160630, 3365.3818, 8.410216  
8813, 160182, 3365.3198, 8.410062  
8814, 160006, 3365.2579, 8.409907  
8815, 159948, 3365.1960, 8.409752  
8816, 159608, 3365.1341, 8.409597  
8817, 158776, 3365.0721, 8.409443  
8818, 157646, 3365.0102, 8.409288  
8819, 156618, 3364.9483, 8.409133  
8820, 155896, 3364.8864, 8.408978  
8821, 155386, 3364.8244, 8.408824  
8822, 154962, 3364.7625, 8.408669  
8823, 154736, 3364.7006, 8.408514  
8824, 155014, 3364.6386, 8.408359  
8825, 155938, 3364.5767, 8.408205  
8826, 157226, 3364.5148, 8.408050  
8827, 158342, 3364.4529, 8.407895  
8828, 158900, 3364.3909, 8.407740  
8829, 158922, 3364.3290, 8.407586  
8830, 158706, 3364.2671, 8.407431  
8831, 158502, 3364.2052, 8.407276  
8832, 158316, 3364.1432, 8.407121  
8833, 158064, 3364.0813, 8.406967  
8834, 157726, 3364.0194, 8.406812  
8835, 157392, 3363.9574, 8.406657  
8836, 157132, 3363.8955, 8.406502  
8837, 156950, 3363.8336, 8.406348  
8838, 156898, 3363.7717, 8.406193  
8839, 157108, 3363.7097, 8.406038  
8840, 157666, 3363.6478, 8.405883  
8841, 158386, 3363.5859, 8.405729  
8842, 158798, 3363.5240, 8.405574  
8843, 158510, 3363.4620, 8.405419  
8844, 157654, 3363.4001, 8.405264  
8845, 156864, 3363.3382, 8.405109  
8846, 156774, 3363.2763, 8.404955  
8847, 157470, 3363.2143, 8.404800  
8848, 158416, 3363.1524, 8.404645  
8849, 158978, 3363.0905, 8.404490  
8850, 159014, 3363.0285, 8.404336  
8851, 158916, 3362.9666, 8.404181  
8852, 159100, 3362.9047, 8.404026  
8853, 159540, 3362.8428, 8.403871  
8854, 159772, 3362.7808, 8.403717  
8855, 159412, 3362.7189, 8.403562  
8856, 158580, 3362.6570, 8.403407  
8857, 157790, 3362.5951, 8.403252  
8858, 157488, 3362.5331, 8.403098  
8859, 157680, 3362.4712, 8.402943  
8860, 158052, 3362.4093, 8.402788  
8861, 158350, 3362.3473, 8.402633  
8862, 158578, 3362.2854, 8.402479  
8863, 158892, 3362.2235, 8.402324  
8864, 159348, 3362.1616, 8.402169  
8865, 159812, 3362.0996, 8.402014







9322, 152668, 3333.7990, 8.331290  
9323, 152386, 3333.7371, 8.331135  
9324, 151880, 3333.6752, 8.330981  
9325, 151256, 3333.6133, 8.330826  
9326, 150792, 3333.5513, 8.330671  
9327, 150824, 3333.4894, 8.330516  
9328, 151454, 3333.4275, 8.330362  
9329, 152402, 3333.3656, 8.330207  
9330, 153176, 3333.3036, 8.330052  
9331, 153442, 3333.2417, 8.329897  
9332, 153284, 3333.1798, 8.329742  
9333, 153040, 3333.1179, 8.329588  
9334, 152942, 3333.0559, 8.329433  
9335, 152924, 3332.9940, 8.329278  
9336, 152732, 3332.9321, 8.329123  
9337, 152298, 3332.8701, 8.328969  
9338, 151826, 3332.8082, 8.328814  
9339, 151622, 3332.7463, 8.328659  
9340, 151798, 3332.6844, 8.328504  
9341, 152194, 3332.6224, 8.328350  
9342, 152592, 3332.5605, 8.328195  
9343, 152934, 3332.4986, 8.328040  
9344, 153346, 3332.4367, 8.327885  
9345, 153936, 3332.3747, 8.327731  
9346, 154640, 3332.3128, 8.327576  
9347, 155286, 3332.2509, 8.327421  
9348, 155700, 3332.1889, 8.327266  
9349, 155824, 3332.1270, 8.327112  
9350, 155644, 3332.0651, 8.326957  
9351, 155168, 3332.0032, 8.326802  
9352, 154482, 3331.9412, 8.326647  
9353, 153812, 3331.8793, 8.326493  
9354, 153428, 3331.8174, 8.326338  
9355, 153414, 3331.7555, 8.326183  
9356, 153552, 3331.6935, 8.326028  
9357, 153470, 3331.6316, 8.325874  
9358, 153034, 3331.5697, 8.325719  
9359, 152512, 3331.5078, 8.325564  
9360, 152392, 3331.4458, 8.325409  
9361, 152906, 3331.3839, 8.325255  
9362, 153820, 3331.3220, 8.325100  
9363, 154592, 3331.2600, 8.324945  
9364, 154824, 3331.1981, 8.324790  
9365, 154530, 3331.1362, 8.324635  
9366, 154062, 3331.0743, 8.324481  
9367, 153786, 3331.0123, 8.324326  
9368, 153874, 3330.9504, 8.324171  
9369, 154302, 3330.8885, 8.324016  
9370, 154946, 3330.8266, 8.323862  
9371, 155612, 3330.7646, 8.323707  
9372, 156054, 3330.7027, 8.323552  
9373, 156068, 3330.6408, 8.323397  
9374, 155630, 3330.5788, 8.323243  
9375, 154980, 3330.5169, 8.323088  
9376, 154452, 3330.4550, 8.322933  
9377, 154204, 3330.3931, 8.322778  
9378, 154122, 3330.3311, 8.322624  
9379, 154012, 3330.2692, 8.322469  
9380, 153856, 3330.2073, 8.322314  
9381, 153848, 3330.1454, 8.322159  
9382, 154160, 3330.0834, 8.322005  
9383, 154692, 3330.0215, 8.321850  
9384, 155148, 3329.9596, 8.321695  
9385, 155360, 3329.8977, 8.321540  
9386, 155476, 3329.8357, 8.321386  
9387, 155806, 3329.7738, 8.321231  
9388, 156432, 3329.7119, 8.321076  
9389, 157048, 3329.6499, 8.320921  
9390, 157198, 3329.5880, 8.320767  
9391, 156750, 3329.5261, 8.320612  
9392, 156010, 3329.4642, 8.320457  
9393, 155464, 3329.4022, 8.320302  
9394, 155358, 3329.3403, 8.320148  
9395, 155548, 3329.2784, 8.319993  
9396, 155746, 3329.2165, 8.319838  
9397, 155830, 3329.1545, 8.319683

9398, 155866, 3329.0926, 8.319528  
9399, 155952, 3329.0307, 8.319374  
9400, 156078, 3328.9687, 8.319219  
9401, 156186, 3328.9068, 8.319064  
9402, 156328, 3328.8449, 8.318909  
9403, 156646, 3328.7830, 8.318755  
9404, 157134, 3328.7210, 8.318600  
9405, 157540, 3328.6591, 8.318445  
9406, 157498, 3328.5972, 8.318290  
9407, 156902, 3328.5353, 8.318136  
9408, 156024, 3328.4733, 8.317981  
9409, 155336, 3328.4114, 8.317826  
9410, 155102, 3328.3495, 8.317671  
9411, 155242, 3328.2876, 8.317517  
9412, 155504, 3328.2256, 8.317362  
9413, 155748, 3328.1637, 8.317207  
9414, 155996, 3328.1018, 8.317052  
9415, 156288, 3328.0398, 8.316898  
9416, 156552, 3327.9779, 8.316743  
9417, 156700, 3327.9160, 8.316588  
9418, 156824, 3327.8541, 8.316433  
9419, 157158, 3327.7921, 8.316279  
9420, 157816, 3327.7302, 8.316124  
9421, 158536, 3327.6683, 8.315969  
9422, 158812, 3327.6064, 8.315814  
9423, 158328, 3327.5444, 8.315660  
9424, 157274, 3327.4825, 8.315505  
9425, 156228, 3327.4206, 8.315350  
9426, 155674, 3327.3586, 8.315195  
9427, 155680, 3327.2967, 8.315041  
9428, 155964, 3327.2348, 8.314886  
9429, 156238, 3327.1729, 8.314731  
9430, 156406, 3327.1109, 8.314576  
9431, 156466, 3327.0490, 8.314421  
9432, 156336, 3326.9871, 8.314267  
9433, 155870, 3326.9252, 8.314112  
9434, 155086, 3326.8632, 8.313957  
9435, 154270, 3326.8013, 8.313802  
9436, 153798, 3326.7394, 8.313648  
9437, 153810, 3326.6775, 8.313493  
9438, 154098, 3326.6155, 8.313338  
9439, 154334, 3326.5536, 8.313183  
9440, 154396, 3326.4917, 8.313029  
9441, 154392, 3326.4297, 8.312874  
9442, 154438, 3326.3678, 8.312719  
9443, 154416, 3326.3059, 8.312564  
9444, 154108, 3326.2440, 8.312410  
9445, 153466, 3326.1820, 8.312255  
9446, 152778, 3326.1201, 8.312100  
9447, 152446, 3326.0582, 8.311945  
9448, 152676, 3325.9963, 8.311791  
9449, 153366, 3325.9343, 8.311636  
9450, 154312, 3325.8724, 8.311481  
9451, 155414, 3325.8105, 8.311326  
9452, 156624, 3325.7485, 8.311172  
9453, 157736, 3325.6866, 8.311017  
9454, 158354, 3325.6247, 8.310862  
9455, 158174, 3325.5628, 8.310707  
9456, 157370, 3325.5008, 8.310553  
9457, 156544, 3325.4389, 8.310398  
9458, 156258, 3325.3770, 8.310243  
9459, 156562, 3325.3151, 8.310088  
9460, 157000, 3325.2531, 8.309934  
9461, 157082, 3325.1912, 8.309779  
9462, 156762, 3325.1293, 8.309624  
9463, 156394, 3325.0674, 8.309469  
9464, 156322, 3325.0054, 8.309314  
9465, 156488, 3324.9435, 8.309160  
9466, 156560, 3324.8816, 8.309005  
9467, 156302, 3324.8196, 8.308850  
9468, 155814, 3324.7577, 8.308695  
9469, 155374, 3324.6958, 8.308541  
9470, 155136, 3324.6339, 8.308386  
9471, 155042, 3324.5719, 8.308231  
9472, 155000, 3324.5100, 8.308076  
9473, 155050, 3324.4481, 8.307922

9474, 155298, 3324.3862, 8.307767  
9475, 155664, 3324.3242, 8.307612  
9476, 155874, 3324.2623, 8.307457  
9477, 155706, 3324.2004, 8.307303  
9478, 155278, 3324.1384, 8.307148  
9479, 154978, 3324.0765, 8.306993  
9480, 155078, 3324.0146, 8.306838  
9481, 155464, 3323.9527, 8.306684  
9482, 155764, 3323.8907, 8.306529  
9483, 155778, 3323.8288, 8.306374  
9484, 155696, 3323.7669, 8.306219  
9485, 155880, 3323.7050, 8.306065  
9486, 156434, 3323.6430, 8.305910  
9487, 157076, 3323.5811, 8.305755  
9488, 157438, 3323.5192, 8.305600  
9489, 157458, 3323.4573, 8.305446  
9490, 157420, 3323.3953, 8.305291  
9491, 157576, 3323.3334, 8.305136  
9492, 157818, 3323.2715, 8.304981  
9493, 157794, 3323.2095, 8.304827  
9494, 157288, 3323.1476, 8.304672  
9495, 156498, 3323.0857, 8.304517  
9496, 155822, 3323.0238, 8.304362  
9497, 155464, 3322.9618, 8.304207  
9498, 155288, 3322.8999, 8.304053  
9499, 155030, 3322.8380, 8.303898  
9500, 154680, 3322.7761, 8.303743  
9501, 154476, 3322.7141, 8.303588  
9502, 154588, 3322.6522, 8.303434  
9503, 154874, 3322.5903, 8.303279  
9504, 155024, 3322.5283, 8.303124  
9505, 154950, 3322.4664, 8.302969  
9506, 154940, 3322.4045, 8.302815  
9507, 155378, 3322.3426, 8.302660  
9508, 156276, 3322.2806, 8.302505  
9509, 157174, 3322.2187, 8.302350  
9510, 157492, 3322.1568, 8.302196  
9511, 157090, 3322.0949, 8.302041  
9512, 156370, 3322.0329, 8.301886  
9513, 155912, 3321.9710, 8.301731  
9514, 155988, 3321.9091, 8.301577  
9515, 156424, 3321.8472, 8.301422  
9516, 156866, 3321.7852, 8.301267  
9517, 157156, 3321.7233, 8.301112  
9518, 157404, 3321.6614, 8.300958  
9519, 157774, 3321.5994, 8.300803  
9520, 158264, 3321.5375, 8.300648  
9521, 158704, 3321.4756, 8.300493  
9522, 158912, 3321.4137, 8.300339  
9523, 158836, 3321.3517, 8.300184  
9524, 158564, 3321.2898, 8.300029  
9525, 158252, 3321.2279, 8.299874  
9526, 158068, 3321.1660, 8.299720  
9527, 158150, 3321.1040, 8.299565  
9528, 158532, 3321.0421, 8.299410  
9529, 159050, 3320.9802, 8.299255  
9530, 159426, 3320.9183, 8.299100  
9531, 159426, 3320.8563, 8.298946  
9532, 159082, 3320.7944, 8.298791  
9533, 158672, 3320.7325, 8.298636  
9534, 158486, 3320.6705, 8.298481  
9535, 158596, 3320.6086, 8.298327  
9536, 158810, 3320.5467, 8.298172  
9537, 158900, 3320.4848, 8.298017  
9538, 158788, 3320.4228, 8.297862  
9539, 158578, 3320.3609, 8.297708  
9540, 158398, 3320.2990, 8.297553  
9541, 158252, 3320.2371, 8.297398  
9542, 158074, 3320.1751, 8.297243  
9543, 157858, 3320.1132, 8.297089  
9544, 157694, 3320.0513, 8.296934  
9545, 157648, 3319.9893, 8.296779  
9546, 157666, 3319.9274, 8.296624  
9547, 157604, 3319.8655, 8.296470  
9548, 157394, 3319.8036, 8.296315  
9549, 157090, 3319.7416, 8.296160

9550, 156794, 3319.6797, 8.296005  
9551, 156520, 3319.6178, 8.295851  
9552, 156202, 3319.5559, 8.295696  
9553, 155802, 3319.4939, 8.295541  
9554, 155444, 3319.4320, 8.295386  
9555, 155328, 3319.3701, 8.295232  
9556, 155538, 3319.3082, 8.295077  
9557, 155942, 3319.2462, 8.294922  
9558, 156320, 3319.1843, 8.294767  
9559, 156556, 3319.1224, 8.294612  
9560, 156702, 3319.0604, 8.294458  
9561, 156860, 3318.9985, 8.294303  
9562, 157056, 3318.9366, 8.294148  
9563, 157258, 3318.8747, 8.293993  
9564, 157494, 3318.8127, 8.293839  
9565, 157876, 3318.7508, 8.293684  
9566, 158444, 3318.6889, 8.293529  
9567, 159004, 3318.6270, 8.293374  
9568, 159234, 3318.5650, 8.293220  
9569, 158964, 3318.5031, 8.293065  
9570, 158386, 3318.4412, 8.292910  
9571, 157916, 3318.3792, 8.292755  
9572, 157810, 3318.3173, 8.292601  
9573, 157926, 3318.2554, 8.292446  
9574, 157886, 3318.1935, 8.292291  
9575, 157528, 3318.1315, 8.292136  
9576, 157094, 3318.0696, 8.291982  
9577, 157042, 3318.0077, 8.291827  
9578, 157556, 3317.9458, 8.291672  
9579, 158350, 3317.8838, 8.291517  
9580, 158900, 3317.8219, 8.291363  
9581, 158912, 3317.7600, 8.291208  
9582, 158534, 3317.6981, 8.291053  
9583, 158170, 3317.6361, 8.290898  
9584, 158116, 3317.5742, 8.290744  
9585, 158340, 3317.5123, 8.290589  
9586, 158580, 3317.4503, 8.290434  
9587, 158612, 3317.3884, 8.290279  
9588, 158372, 3317.3265, 8.290125  
9589, 157956, 3317.2646, 8.289970  
9590, 157552, 3317.2026, 8.289815  
9591, 157380, 3317.1407, 8.289660  
9592, 157618, 3317.0788, 8.289505  
9593, 158292, 3317.0169, 8.289351  
9594, 159198, 3316.9549, 8.289196  
9595, 159978, 3316.8930, 8.289041  
9596, 160384, 3316.8311, 8.288886  
9597, 160386, 3316.7691, 8.288732  
9598, 160170, 3316.7072, 8.288577  
9599, 159888, 3316.6453, 8.288422  
9600, 159556, 3316.5834, 8.288267  
9601, 159136, 3316.5214, 8.288113  
9602, 158728, 3316.4595, 8.287958  
9603, 158556, 3316.3976, 8.287803  
9604, 158762, 3316.3357, 8.287648  
9605, 159184, 3316.2737, 8.287494  
9606, 159460, 3316.2118, 8.287339  
9607, 159358, 3316.1499, 8.287184  
9608, 159062, 3316.0880, 8.287029  
9609, 159042, 3316.0260, 8.286875  
9610, 159616, 3315.9641, 8.286720  
9611, 160652, 3315.9022, 8.286565  
9612, 161648, 3315.8402, 8.286410  
9613, 162142, 3315.7783, 8.286256  
9614, 162046, 3315.7164, 8.286101  
9615, 161570, 3315.6545, 8.285946  
9616, 160970, 3315.5925, 8.285791  
9617, 160322, 3315.5306, 8.285637  
9618, 159614, 3315.4687, 8.285482  
9619, 158874, 3315.4068, 8.285327  
9620, 158222, 3315.3448, 8.285172  
9621, 157736, 3315.2829, 8.285018  
9622, 157374, 3315.2210, 8.284863  
9623, 157062, 3315.1590, 8.284708  
9624, 156850, 3315.0971, 8.284553  
9625, 156916, 3315.0352, 8.284398

9626, 157374, 3314.9733, 8.284244  
9627, 158086, 3314.9113, 8.284089  
9628, 158704, 3314.8494, 8.283934  
9629, 158942, 3314.7875, 8.283779  
9630, 158780, 3314.7256, 8.283625  
9631, 158430, 3314.6636, 8.283470  
9632, 158128, 3314.6017, 8.283315  
9633, 157910, 3314.5398, 8.283160  
9634, 157704, 3314.4779, 8.283006  
9635, 157470, 3314.4159, 8.282851  
9636, 157300, 3314.3540, 8.282696  
9637, 157322, 3314.2921, 8.282541  
9638, 157570, 3314.2301, 8.282387  
9639, 157956, 3314.1682, 8.282232  
9640, 158354, 3314.1063, 8.282077  
9641, 158676, 3314.0444, 8.281922  
9642, 158874, 3313.9824, 8.281768  
9643, 158934, 3313.9205, 8.281613  
9644, 158904, 3313.8586, 8.281458  
9645, 158946, 3313.7967, 8.281303  
9646, 159222, 3313.7347, 8.281149  
9647, 159708, 3313.6728, 8.280994  
9648, 160086, 3313.6109, 8.280839  
9649, 159946, 3313.5489, 8.280684  
9650, 159162, 3313.4870, 8.280530  
9651, 158106, 3313.4251, 8.280375  
9652, 157408, 3313.3632, 8.280220  
9653, 157418, 3313.3012, 8.280065  
9654, 157916, 3313.2393, 8.279911  
9655, 158312, 3313.1774, 8.279756  
9656, 158196, 3313.1155, 8.279601  
9657, 157680, 3313.0535, 8.279446  
9658, 157210, 3312.9916, 8.279291  
9659, 157084, 3312.9297, 8.279137  
9660, 157170, 3312.8678, 8.278982  
9661, 157112, 3312.8058, 8.278827  
9662, 156744, 3312.7439, 8.278672  
9663, 156264, 3312.6820, 8.278518  
9664, 156034, 3312.6200, 8.278363  
9665, 156218, 3312.5581, 8.278208  
9666, 156662, 3312.4962, 8.278053  
9667, 157106, 3312.4343, 8.277899  
9668, 157394, 3312.3723, 8.277744  
9669, 157502, 3312.3104, 8.277589  
9670, 157374, 3312.2485, 8.277434  
9671, 156894, 3312.1866, 8.277280  
9672, 156060, 3312.1246, 8.277125  
9673, 155146, 3312.0627, 8.276970  
9674, 154618, 3312.0008, 8.276815  
9675, 154776, 3311.9388, 8.276661  
9676, 155444, 3311.8769, 8.276506  
9677, 156118, 3311.8150, 8.276351  
9678, 156368, 3311.7531, 8.276196  
9679, 156202, 3311.6911, 8.276042  
9680, 155996, 3311.6292, 8.275887  
9681, 156120, 3311.5673, 8.275732  
9682, 156604, 3311.5054, 8.275577  
9683, 157138, 3311.4434, 8.275423  
9684, 157364, 3311.3815, 8.275268  
9685, 157144, 3311.3196, 8.275113  
9686, 156622, 3311.2577, 8.274958  
9687, 156068, 3311.1957, 8.274804  
9688, 155736, 3311.1338, 8.274649  
9689, 155738, 3311.0719, 8.274494  
9690, 156008, 3311.0099, 8.274339  
9691, 156376, 3310.9480, 8.274184  
9692, 156632, 3310.8861, 8.274030  
9693, 156680, 3310.8242, 8.273875  
9694, 156616, 3310.7622, 8.273720  
9695, 156624, 3310.7003, 8.273565  
9696, 156794, 3310.6384, 8.273411  
9697, 156980, 3310.5765, 8.273256  
9698, 156944, 3310.5145, 8.273101  
9699, 156586, 3310.4526, 8.272946  
9700, 156090, 3310.3907, 8.272792  
9701, 155798, 3310.3287, 8.272637

9702, 155916, 3310.2668, 8.272482  
9703, 156374, 3310.2049, 8.272327  
9704, 156974, 3310.1430, 8.272173  
9705, 157582, 3310.0810, 8.272018  
9706, 158216, 3310.0191, 8.271863  
9707, 158900, 3309.9572, 8.271708  
9708, 159468, 3309.8953, 8.271554  
9709, 159696, 3309.8333, 8.271399  
9710, 159514, 3309.7714, 8.271244  
9711, 159168, 3309.7095, 8.271089  
9712, 159008, 3309.6476, 8.270935  
9713, 159168, 3309.5856, 8.270780  
9714, 159450, 3309.5237, 8.270625  
9715, 159504, 3309.4618, 8.270470  
9716, 159236, 3309.3998, 8.270316  
9717, 158886, 3309.3379, 8.270161  
9718, 158810, 3309.2760, 8.270006  
9719, 159146, 3309.2141, 8.269851  
9720, 159684, 3309.1521, 8.269697  
9721, 160074, 3309.0902, 8.269542  
9722, 160110, 3309.0283, 8.269387  
9723, 159798, 3308.9664, 8.269232  
9724, 159298, 3308.9044, 8.269077  
9725, 158760, 3308.8425, 8.268923  
9726, 158330, 3308.7806, 8.268768  
9727, 158160, 3308.7186, 8.268613  
9728, 158342, 3308.6567, 8.268458  
9729, 158800, 3308.5948, 8.268304  
9730, 159288, 3308.5329, 8.268149  
9731, 159568, 3308.4709, 8.267994  
9732, 159594, 3308.4090, 8.267839  
9733, 159548, 3308.3471, 8.267685  
9734, 159592, 3308.2852, 8.267530  
9735, 159692, 3308.2232, 8.267375  
9736, 159658, 3308.1613, 8.267220  
9737, 159382, 3308.0994, 8.267066  
9738, 158982, 3308.0375, 8.266911  
9739, 158686, 3307.9755, 8.266756  
9740, 158548, 3307.9136, 8.266601  
9741, 158380, 3307.8517, 8.266447  
9742, 157956, 3307.7897, 8.266292  
9743, 157312, 3307.7278, 8.266137  
9744, 156756, 3307.6659, 8.265982  
9745, 156576, 3307.6040, 8.265828  
9746, 156742, 3307.5420, 8.265673  
9747, 156918, 3307.4801, 8.265518  
9748, 156828, 3307.4182, 8.265363  
9749, 156516, 3307.3563, 8.265209  
9750, 156304, 3307.2943, 8.265054  
9751, 156436, 3307.2324, 8.264899  
9752, 156848, 3307.1705, 8.264744  
9753, 157272, 3307.1086, 8.264590  
9754, 157540, 3307.0466, 8.264435  
9755, 157734, 3306.9847, 8.264280  
9756, 158042, 3306.9228, 8.264125  
9757, 158478, 3306.8608, 8.263970  
9758, 158846, 3306.7989, 8.263816  
9759, 158932, 3306.7370, 8.263661  
9760, 158746, 3306.6751, 8.263506  
9761, 158520, 3306.6131, 8.263351  
9762, 158510, 3306.5512, 8.263197  
9763, 158800, 3306.4893, 8.263042  
9764, 159282, 3306.4274, 8.262887  
9765, 159810, 3306.3654, 8.262732  
9766, 160268, 3306.3035, 8.262578  
9767, 160570, 3306.2416, 8.262423  
9768, 160604, 3306.1796, 8.262268  
9769, 160306, 3306.1177, 8.262113  
9770, 159778, 3306.0558, 8.261959  
9771, 159292, 3305.9939, 8.261804  
9772, 159132, 3305.9319, 8.261649  
9773, 159374, 3305.8700, 8.261494  
9774, 159836, 3305.8081, 8.261340  
9775, 160254, 3305.7462, 8.261185  
9776, 160434, 3305.6842, 8.261030  
9777, 160362, 3305.6223, 8.260875

9778, 160128, 3305.5604, 8.260721  
9779, 159852, 3305.4985, 8.260566  
9780, 159656, 3305.4365, 8.260411  
9781, 159698, 3305.3746, 8.260256  
9782, 160070, 3305.3127, 8.260102  
9783, 160700, 3305.2507, 8.259947  
9784, 161314, 3305.1888, 8.259792  
9785, 161614, 3305.1269, 8.259637  
9786, 161494, 3305.0650, 8.259483  
9787, 161124, 3305.0030, 8.259328  
9788, 160798, 3304.9411, 8.259173  
9789, 160686, 3304.8792, 8.259018  
9790, 160726, 3304.8173, 8.258863  
9791, 160736, 3304.7553, 8.258709  
9792, 160616, 3304.6934, 8.258554  
9793, 160414, 3304.6315, 8.258399  
9794, 160252, 3304.5695, 8.258244  
9795, 160182, 3304.5076, 8.258090  
9796, 160182, 3304.4457, 8.257935  
9797, 160170, 3304.3838, 8.257780  
9798, 160092, 3304.3218, 8.257625  
9799, 159900, 3304.2599, 8.257471  
9800, 159594, 3304.1980, 8.257316  
9801, 159234, 3304.1361, 8.257161  
9802, 158986, 3304.0741, 8.257006  
9803, 158992, 3304.0122, 8.256852  
9804, 159260, 3303.9503, 8.256697  
9805, 159596, 3303.8884, 8.256542  
9806, 159730, 3303.8264, 8.256387  
9807, 159548, 3303.7645, 8.256233  
9808, 159160, 3303.7026, 8.256078  
9809, 158776, 3303.6406, 8.255923  
9810, 158520, 3303.5787, 8.255768  
9811, 158374, 3303.5168, 8.255614  
9812, 158326, 3303.4549, 8.255459  
9813, 158484, 3303.3929, 8.255304  
9814, 158968, 3303.3310, 8.255149  
9815, 159694, 3303.2691, 8.254995  
9816, 160322, 3303.2072, 8.254840  
9817, 160472, 3303.1452, 8.254685  
9818, 160072, 3303.0833, 8.254530  
9819, 159416, 3303.0214, 8.254376  
9820, 158860, 3302.9594, 8.254221  
9821, 158534, 3302.8975, 8.254066  
9822, 158262, 3302.8356, 8.253911  
9823, 157926, 3302.7737, 8.253756  
9824, 157696, 3302.7117, 8.253602  
9825, 157892, 3302.6498, 8.253447  
9826, 158576, 3302.5879, 8.253292  
9827, 159338, 3302.5260, 8.253137  
9828, 159604, 3302.4640, 8.252983  
9829, 159186, 3302.4021, 8.252828  
9830, 158504, 3302.3402, 8.252673  
9831, 158248, 3302.2783, 8.252518  
9832, 158734, 3302.2163, 8.252364  
9833, 159600, 3302.1544, 8.252209  
9834, 160144, 3302.0925, 8.252054  
9835, 159912, 3302.0305, 8.251899  
9836, 159028, 3301.9686, 8.251745  
9837, 157984, 3301.9067, 8.251590  
9838, 157238, 3301.8448, 8.251435  
9839, 157006, 3301.7828, 8.251280  
9840, 157298, 3301.7209, 8.251126  
9841, 158058, 3301.6590, 8.250971  
9842, 159134, 3301.5971, 8.250816  
9843, 160204, 3301.5351, 8.250661  
9844, 160888, 3301.4732, 8.250507  
9845, 160998, 3301.4113, 8.250352  
9846, 160750, 3301.3493, 8.250197  
9847, 160534, 3301.2874, 8.250042  
9848, 160596, 3301.2255, 8.249888  
9849, 160778, 3301.1636, 8.249733  
9850, 160778, 3301.1016, 8.249578  
9851, 160486, 3301.0397, 8.249423  
9852, 160138, 3300.9778, 8.249268  
9853, 160032, 3300.9159, 8.249114

9854, 160176, 3300.8539, 8.248959  
9855, 160286, 3300.7920, 8.248804  
9856, 160098, 3300.7301, 8.248649  
9857, 159742, 3300.6682, 8.248495  
9858, 159644, 3300.6062, 8.248340  
9859, 160122, 3300.5443, 8.248185  
9860, 161024, 3300.4824, 8.248030  
9861, 161840, 3300.4204, 8.247876  
9862, 162114, 3300.3585, 8.247721  
9863, 161750, 3300.2966, 8.247566  
9864, 161004, 3300.2347, 8.247411  
9865, 160206, 3300.1727, 8.247257  
9866, 159556, 3300.1108, 8.247102  
9867, 159144, 3300.0489, 8.246947  
9868, 159012, 3299.9870, 8.246792  
9869, 159128, 3299.9250, 8.246638  
9870, 159392, 3299.8631, 8.246483  
9871, 159520, 3299.8012, 8.246328  
9872, 159396, 3299.7392, 8.246173  
9873, 159128, 3299.6773, 8.246019  
9874, 158966, 3299.6154, 8.245864  
9875, 159050, 3299.5535, 8.245709  
9876, 159240, 3299.4915, 8.245554  
9877, 159264, 3299.4296, 8.245400  
9878, 159020, 3299.3677, 8.245245  
9879, 158658, 3299.3058, 8.245090  
9880, 158428, 3299.2438, 8.244935  
9881, 158410, 3299.1819, 8.244781  
9882, 158482, 3299.1200, 8.244626  
9883, 158536, 3299.0581, 8.244471  
9884, 158622, 3298.9961, 8.244316  
9885, 158898, 3298.9342, 8.244161  
9886, 159406, 3298.8723, 8.244007  
9887, 159978, 3298.8103, 8.243852  
9888, 160404, 3298.7484, 8.243697  
9889, 160678, 3298.6865, 8.243542  
9890, 160924, 3298.6246, 8.243388  
9891, 161186, 3298.5626, 8.243233  
9892, 161258, 3298.5007, 8.243078  
9893, 160880, 3298.4388, 8.242923  
9894, 160084, 3298.3769, 8.242769  
9895, 159278, 3298.3149, 8.242614  
9896, 158946, 3298.2530, 8.242459  
9897, 159190, 3298.1911, 8.242304  
9898, 159648, 3298.1291, 8.242150  
9899, 159868, 3298.0672, 8.241995  
9900, 159728, 3298.0053, 8.241840  
9901, 159490, 3297.9434, 8.241685  
9902, 159440, 3297.8814, 8.241531  
9903, 159534, 3297.8195, 8.241376  
9904, 159496, 3297.7576, 8.241221  
9905, 159170, 3297.6957, 8.241066  
9906, 158726, 3297.6337, 8.240912  
9907, 158468, 3297.5718, 8.240757  
9908, 158474, 3297.5099, 8.240602  
9909, 158516, 3297.4480, 8.240447  
9910, 158364, 3297.3860, 8.240293  
9911, 158090, 3297.3241, 8.240138  
9912, 157986, 3297.2622, 8.239983  
9913, 158170, 3297.2002, 8.239828  
9914, 158390, 3297.1383, 8.239674  
9915, 158254, 3297.0764, 8.239519  
9916, 157712, 3297.0145, 8.239364  
9917, 157164, 3296.9525, 8.239209  
9918, 157060, 3296.8906, 8.239054  
9919, 157430, 3296.8287, 8.238900  
9920, 157796, 3296.7668, 8.238745  
9921, 157702, 3296.7048, 8.238590  
9922, 157200, 3296.6429, 8.238435  
9923, 156822, 3296.5810, 8.238281  
9924, 156990, 3296.5190, 8.238126  
9925, 157586, 3296.4571, 8.237971  
9926, 158042, 3296.3952, 8.237816  
9927, 157960, 3296.3333, 8.237662  
9928, 157476, 3296.2713, 8.237507  
9929, 157104, 3296.2094, 8.237352

9930, 157210, 3296.1475, 8.237197  
9931, 157706, 3296.0856, 8.237043  
9932, 158268, 3296.0236, 8.236888  
9933, 158724, 3295.9617, 8.236733  
9934, 159206, 3295.8998, 8.236578  
9935, 159872, 3295.8379, 8.236424  
9936, 160648, 3295.7759, 8.236269  
9937, 161230, 3295.7140, 8.236114  
9938, 161422, 3295.6521, 8.235959  
9939, 161330, 3295.5901, 8.235805  
9940, 161212, 3295.5282, 8.235650  
9941, 161176, 3295.4663, 8.235495  
9942, 161070, 3295.4044, 8.235340  
9943, 160702, 3295.3424, 8.235186  
9944, 160110, 3295.2805, 8.235031  
9945, 159574, 3295.2186, 8.234876  
9946, 159392, 3295.1567, 8.234721  
9947, 159636, 3295.0947, 8.234567  
9948, 160162, 3295.0328, 8.234412  
9949, 160784, 3294.9709, 8.234257  
9950, 161370, 3294.9090, 8.234102  
9951, 161776, 3294.8470, 8.233947  
9952, 161790, 3294.7851, 8.233793  
9953, 161258, 3294.7232, 8.233638  
9954, 160288, 3294.6612, 8.233483  
9955, 159282, 3294.5993, 8.233328  
9956, 158680, 3294.5374, 8.233174  
9957, 158598, 3294.4755, 8.233019  
9958, 158806, 3294.4135, 8.232864  
9959, 159002, 3294.3516, 8.232709  
9960, 159122, 3294.2897, 8.232555  
9961, 159344, 3294.2278, 8.232400  
9962, 159808, 3294.1658, 8.232245  
9963, 160374, 3294.1039, 8.232090  
9964, 160716, 3294.0420, 8.231936  
9965, 160664, 3293.9800, 8.231781  
9966, 160366, 3293.9181, 8.231626  
9967, 160134, 3293.8562, 8.231471  
9968, 160140, 3293.7943, 8.231317  
9969, 160282, 3293.7323, 8.231162  
9970, 160370, 3293.6704, 8.231007  
9971, 160358, 3293.6085, 8.230852  
9972, 160340, 3293.5466, 8.230698  
9973, 160388, 3293.4846, 8.230543  
9974, 160400, 3293.4227, 8.230388  
9975, 160214, 3293.3608, 8.230233  
9976, 159836, 3293.2989, 8.230079  
9977, 159498, 3293.2369, 8.229924  
9978, 159446, 3293.1750, 8.229769  
9979, 159716, 3293.1131, 8.229614  
9980, 160112, 3293.0511, 8.229460  
9981, 160426, 3292.9892, 8.229305  
9982, 160622, 3292.9273, 8.229150  
9983, 160834, 3292.8654, 8.228995  
9984, 161160, 3292.8034, 8.228840  
9985, 161568, 3292.7415, 8.228686  
9986, 161976, 3292.6796, 8.228531  
9987, 162356, 3292.6177, 8.228376  
9988, 162710, 3292.5557, 8.228221  
9989, 162926, 3292.4938, 8.228067  
9990, 162792, 3292.4319, 8.227912  
9991, 162216, 3292.3699, 8.227757  
9992, 161466, 3292.3080, 8.227602  
9993, 161066, 3292.2461, 8.227448  
9994, 161384, 3292.1842, 8.227293  
9995, 162244, 3292.1222, 8.227138  
9996, 162996, 3292.0603, 8.226983  
9997, 163040, 3291.9984, 8.226829  
9998, 162304, 3291.9365, 8.226674  
9999, 161236, 3291.8745, 8.226519  
10000, 160388, 3291.8126, 8.226364  
10001, 159958, 3291.7507, 8.226210  
10002, 159774, 3291.6888, 8.226055

|          |         |            |          |         |            |          |         |            |
|----------|---------|------------|----------|---------|------------|----------|---------|------------|
| 10003,   | 159600, | 3291.6268, | 10041,   | 161344, | 3289.2736, | 10079,   | 160214, | 3286.9204, |
| 8.225900 |         |            | 8.220019 |         |            | 8.214139 |         |            |
| 10004,   | 159440, | 3291.5649, | 10042,   | 160940, | 3289.2117, | 10080,   | 159858, | 3286.8585, |
| 8.225745 |         |            | 8.219865 |         |            | 8.213984 |         |            |
| 10005,   | 159472, | 3291.5030, | 10043,   | 160612, | 3289.1497, | 10081,   | 159922, | 3286.7965, |
| 8.225591 |         |            | 8.219710 |         |            | 8.213829 |         |            |
| 10006,   | 159778, | 3291.4410, | 10044,   | 160390, | 3289.0878, | 10082,   | 160296, | 3286.7346, |
| 8.225436 |         |            | 8.219555 |         |            | 8.213674 |         |            |
| 10007,   | 160202, | 3291.3791, | 10045,   | 160184, | 3289.0259, | 10083,   | 160638, | 3286.6727, |
| 8.225281 |         |            | 8.219400 |         |            | 8.213519 |         |            |
| 10008,   | 160462, | 3291.3172, | 10046,   | 159916, | 3288.9640, | 10084,   | 160702, | 3286.6107, |
| 8.225126 |         |            | 8.219246 |         |            | 8.213365 |         |            |
| 10009,   | 160398, | 3291.2553, | 10047,   | 159628, | 3288.9020, | 10085,   | 160562, | 3286.5488, |
| 8.224972 |         |            | 8.219091 |         |            | 8.213210 |         |            |
| 10010,   | 160042, | 3291.1933, | 10048,   | 159438, | 3288.8401, | 10086,   | 160474, | 3286.4869, |
| 8.224817 |         |            | 8.218936 |         |            | 8.213055 |         |            |
| 10011,   | 159524, | 3291.1314, | 10049,   | 159428, | 3288.7782, | 10087,   | 160572, | 3286.4250, |
| 8.224662 |         |            | 8.218781 |         |            | 8.212900 |         |            |
| 10012,   | 158954, | 3291.0695, | 10050,   | 159588, | 3288.7163, | 10088,   | 160718, | 3286.3630, |
| 8.224507 |         |            | 8.218626 |         |            | 8.212746 |         |            |
| 10013,   | 158464, | 3291.0076, | 10051,   | 159878, | 3288.6543, | 10089,   | 160658, | 3286.3011, |
| 8.224353 |         |            | 8.218472 |         |            | 8.212591 |         |            |
| 10014,   | 158282, | 3290.9456, | 10052,   | 160254, | 3288.5924, | 10090,   | 160298, | 3286.2392, |
| 8.224198 |         |            | 8.218317 |         |            | 8.212436 |         |            |
| 10015,   | 158640, | 3290.8837, | 10053,   | 160618, | 3288.5305, | 10091,   | 159824, | 3286.1773, |
| 8.224043 |         |            | 8.218162 |         |            | 8.212281 |         |            |
| 10016,   | 159546, | 3290.8218, | 10054,   | 160810, | 3288.4686, | 10092,   | 159514, | 3286.1153, |
| 8.223888 |         |            | 8.218007 |         |            | 8.212127 |         |            |
| 10017,   | 160594, | 3290.7598, | 10055,   | 160666, | 3288.4066, | 10093,   | 159502, | 3286.0534, |
| 8.223733 |         |            | 8.217853 |         |            | 8.211972 |         |            |
| 10018,   | 161188, | 3290.6979, | 10056,   | 160220, | 3288.3447, | 10094,   | 159688, | 3285.9915, |
| 8.223579 |         |            | 8.217698 |         |            | 8.211817 |         |            |
| 10019,   | 160968, | 3290.6360, | 10057,   | 159754, | 3288.2828, | 10095,   | 159892, | 3285.9295, |
| 8.223424 |         |            | 8.217543 |         |            | 8.211662 |         |            |
| 10020,   | 160106, | 3290.5741, | 10058,   | 159620, | 3288.2208, | 10096,   | 160070, | 3285.8676, |
| 8.223269 |         |            | 8.217388 |         |            | 8.211508 |         |            |
| 10021,   | 159190, | 3290.5121, | 10059,   | 159908, | 3288.1589, | 10097,   | 160372, | 3285.8057, |
| 8.223114 |         |            | 8.217234 |         |            | 8.211353 |         |            |
| 10022,   | 158746, | 3290.4502, | 10060,   | 160318, | 3288.0970, | 10098,   | 160998, | 3285.7438, |
| 8.222960 |         |            | 8.217079 |         |            | 8.211198 |         |            |
| 10023,   | 158858, | 3290.3883, | 10061,   | 160374, | 3288.0351, | 10099,   | 161958, | 3285.6818, |
| 8.222805 |         |            | 8.216924 |         |            | 8.211043 |         |            |
| 10024,   | 159186, | 3290.3264, | 10062,   | 159856, | 3287.9731, | 10100,   | 162998, | 3285.6199, |
| 8.222650 |         |            | 8.216769 |         |            | 8.210889 |         |            |
| 10025,   | 159316, | 3290.2644, | 10063,   | 158994, | 3287.9112, | 10101,   | 163712, | 3285.5580, |
| 8.222495 |         |            | 8.216615 |         |            | 8.210734 |         |            |
| 10026,   | 159116, | 3290.2025, | 10064,   | 158300, | 3287.8493, | 10102,   | 163780, | 3285.4961, |
| 8.222341 |         |            | 8.216460 |         |            | 8.210579 |         |            |
| 10027,   | 158798, | 3290.1406, | 10065,   | 158158, | 3287.7874, | 10103,   | 163186, | 3285.4341, |
| 8.222186 |         |            | 8.216305 |         |            | 8.210424 |         |            |
| 10028,   | 158684, | 3290.0787, | 10066,   | 158566, | 3287.7254, | 10104,   | 162254, | 3285.3722, |
| 8.222031 |         |            | 8.216150 |         |            | 8.210270 |         |            |
| 10029,   | 158960, | 3290.0167, | 10067,   | 159228, | 3287.6635, | 10105,   | 161430, | 3285.3103, |
| 8.221876 |         |            | 8.215996 |         |            | 8.210115 |         |            |
| 10030,   | 159578, | 3289.9548, | 10068,   | 159850, | 3287.6016, | 10106,   | 160998, | 3285.2484, |
| 8.221722 |         |            | 8.215841 |         |            | 8.209960 |         |            |
| 10031,   | 160330, | 3289.8929, | 10069,   | 160296, | 3287.5396, | 10107,   | 160892, | 3285.1864, |
| 8.221567 |         |            | 8.215686 |         |            | 8.209805 |         |            |
| 10032,   | 160962, | 3289.8309, | 10070,   | 160576, | 3287.4777, | 10108,   | 160788, | 3285.1245, |
| 8.221412 |         |            | 8.215531 |         |            | 8.209651 |         |            |
| 10033,   | 161290, | 3289.7690, | 10071,   | 160704, | 3287.4158, | 10109,   | 160444, | 3285.0626, |
| 8.221257 |         |            | 8.215377 |         |            | 8.209496 |         |            |
| 10034,   | 161306, | 3289.7071, | 10072,   | 160688, | 3287.3539, | 10110,   | 159918, | 3285.0006, |
| 8.221103 |         |            | 8.215222 |         |            | 8.209341 |         |            |
| 10035,   | 161146, | 3289.6452, | 10073,   | 160620, | 3287.2919, | 10111,   | 159540, | 3284.9387, |
| 8.220948 |         |            | 8.215067 |         |            | 8.209186 |         |            |
| 10036,   | 161056, | 3289.5832, | 10074,   | 160648, | 3287.2300, | 10112,   | 159584, | 3284.8768, |
| 8.220793 |         |            | 8.214912 |         |            | 8.209032 |         |            |
| 10037,   | 161182, | 3289.5213, | 10075,   | 160844, | 3287.1681, | 10113,   | 159990, | 3284.8149, |
| 8.220638 |         |            | 8.214758 |         |            | 8.208877 |         |            |
| 10038,   | 161470, | 3289.4594, | 10076,   | 161084, | 3287.1062, | 10114,   | 160430, | 3284.7529, |
| 8.220484 |         |            | 8.214603 |         |            | 8.208722 |         |            |
| 10039,   | 161694, | 3289.3975, | 10077,   | 161104, | 3287.0442, | 10115,   | 160642, | 3284.6910, |
| 8.220329 |         |            | 8.214448 |         |            | 8.208567 |         |            |
| 10040,   | 161654, | 3289.3355, | 10078,   | 160752, | 3286.9823, | 10116,   | 160718, | 3284.6291, |
| 8.220174 |         |            | 8.214293 |         |            | 8.208412 |         |            |

|          |         |            |          |         |            |          |         |            |
|----------|---------|------------|----------|---------|------------|----------|---------|------------|
| 10117,   | 160994, | 3284.5672, | 10155,   | 159368, | 3282.2139, | 10193,   | 162558, | 3279.8607, |
| 8.208258 |         |            | 8.202377 |         |            | 8.196496 |         |            |
| 10118,   | 161684, | 3284.5052, | 10156,   | 159930, | 3282.1520, | 10194,   | 162258, | 3279.7988, |
| 8.208103 |         |            | 8.202222 |         |            | 8.196341 |         |            |
| 10119,   | 162596, | 3284.4433, | 10157,   | 160474, | 3282.0901, | 10195,   | 162254, | 3279.7369, |
| 8.207948 |         |            | 8.202067 |         |            | 8.196187 |         |            |
| 10120,   | 163292, | 3284.3814, | 10158,   | 160792, | 3282.0282, | 10196,   | 162458, | 3279.6749, |
| 8.207793 |         |            | 8.201913 |         |            | 8.196032 |         |            |
| 10121,   | 163506, | 3284.3194, | 10159,   | 160856, | 3281.9662, | 10197,   | 162660, | 3279.6130, |
| 8.207639 |         |            | 8.201758 |         |            | 8.195877 |         |            |
| 10122,   | 163398, | 3284.2575, | 10160,   | 160914, | 3281.9043, | 10198,   | 162802, | 3279.5511, |
| 8.207484 |         |            | 8.201603 |         |            | 8.195722 |         |            |
| 10123,   | 163364, | 3284.1956, | 10161,   | 161270, | 3281.8424, | 10199,   | 162942, | 3279.4892, |
| 8.207329 |         |            | 8.201448 |         |            | 8.195568 |         |            |
| 10124,   | 163606, | 3284.1337, | 10162,   | 161998, | 3281.7804, | 10200,   | 163016, | 3279.4272, |
| 8.207174 |         |            | 8.201294 |         |            | 8.195413 |         |            |
| 10125,   | 163944, | 3284.0717, | 10163,   | 162834, | 3281.7185, | 10201,   | 162798, | 3279.3653, |
| 8.207020 |         |            | 8.201139 |         |            | 8.195258 |         |            |
| 10126,   | 164044, | 3284.0098, | 10164,   | 163378, | 3281.6566, | 10202,   | 162120, | 3279.3034, |
| 8.206865 |         |            | 8.200984 |         |            | 8.195103 |         |            |
| 10127,   | 163806, | 3283.9479, | 10165,   | 163400, | 3281.5947, | 10203,   | 161144, | 3279.2414, |
| 8.206710 |         |            | 8.200829 |         |            | 8.194949 |         |            |
| 10128,   | 163476, | 3283.8860, | 10166,   | 162974, | 3281.5327, | 10204,   | 160342, | 3279.1795, |
| 8.206555 |         |            | 8.200675 |         |            | 8.194794 |         |            |
| 10129,   | 163382, | 3283.8240, | 10167,   | 162334, | 3281.4708, | 10205,   | 160120, | 3279.1176, |
| 8.206401 |         |            | 8.200520 |         |            | 8.194639 |         |            |
| 10130,   | 163588, | 3283.7621, | 10168,   | 161708, | 3281.4089, | 10206,   | 160450, | 3279.0557, |
| 8.206246 |         |            | 8.200365 |         |            | 8.194484 |         |            |
| 10131,   | 163838, | 3283.7002, | 10169,   | 161266, | 3281.3470, | 10207,   | 160926, | 3278.9937, |
| 8.206091 |         |            | 8.200210 |         |            | 8.194330 |         |            |
| 10132,   | 163856, | 3283.6383, | 10170,   | 161182, | 3281.2850, | 10208,   | 161154, | 3278.9318, |
| 8.205936 |         |            | 8.200056 |         |            | 8.194175 |         |            |
| 10133,   | 163628, | 3283.5763, | 10171,   | 161604, | 3281.2231, | 10209,   | 161094, | 3278.8699, |
| 8.205782 |         |            | 8.199901 |         |            | 8.194020 |         |            |
| 10134,   | 163388, | 3283.5144, | 10172,   | 162472, | 3281.1612, | 10210,   | 160976, | 3278.8080, |
| 8.205627 |         |            | 8.199746 |         |            | 8.193865 |         |            |
| 10135,   | 163300, | 3283.4525, | 10173,   | 163394, | 3281.0993, | 10211,   | 160994, | 3278.7460, |
| 8.205472 |         |            | 8.199591 |         |            | 8.193710 |         |            |
| 10136,   | 163276, | 3283.3905, | 10174,   | 163854, | 3281.0373, | 10212,   | 161096, | 3278.6841, |
| 8.205317 |         |            | 8.199437 |         |            | 8.193556 |         |            |
| 10137,   | 163064, | 3283.3286, | 10175,   | 163588, | 3280.9754, | 10213,   | 161140, | 3278.6222, |
| 8.205163 |         |            | 8.199282 |         |            | 8.193401 |         |            |
| 10138,   | 162580, | 3283.2667, | 10176,   | 162814, | 3280.9135, | 10214,   | 161138, | 3278.5602, |
| 8.205008 |         |            | 8.199127 |         |            | 8.193246 |         |            |
| 10139,   | 162022, | 3283.2048, | 10177,   | 162040, | 3280.8515, | 10215,   | 161322, | 3278.4983, |
| 8.204853 |         |            | 8.198972 |         |            | 8.193091 |         |            |
| 10140,   | 161702, | 3283.1428, | 10178,   | 161656, | 3280.7896, | 10216,   | 161820, | 3278.4364, |
| 8.204698 |         |            | 8.198817 |         |            | 8.192937 |         |            |
| 10141,   | 161770, | 3283.0809, | 10179,   | 161654, | 3280.7277, | 10217,   | 162454, | 3278.3745, |
| 8.204544 |         |            | 8.198663 |         |            | 8.192782 |         |            |
| 10142,   | 162104, | 3283.0190, | 10180,   | 161774, | 3280.6658, | 10218,   | 162816, | 3278.3125, |
| 8.204389 |         |            | 8.198508 |         |            | 8.192627 |         |            |
| 10143,   | 162472, | 3282.9571, | 10181,   | 161876, | 3280.6038, | 10219,   | 162648, | 3278.2506, |
| 8.204234 |         |            | 8.198353 |         |            | 8.192472 |         |            |
| 10144,   | 162742, | 3282.8951, | 10182,   | 162056, | 3280.5419, | 10220,   | 162106, | 3278.1887, |
| 8.204079 |         |            | 8.198198 |         |            | 8.192318 |         |            |
| 10145,   | 162892, | 3282.8332, | 10183,   | 162436, | 3280.4800, | 10221,   | 161626, | 3278.1268, |
| 8.203924 |         |            | 8.198044 |         |            | 8.192163 |         |            |
| 10146,   | 162886, | 3282.7713, | 10184,   | 162892, | 3280.4181, | 10222,   | 161526, | 3278.0648, |
| 8.203770 |         |            | 8.197889 |         |            | 8.192008 |         |            |
| 10147,   | 162604, | 3282.7093, | 10185,   | 163094, | 3280.3561, | 10223,   | 161812, | 3278.0029, |
| 8.203615 |         |            | 8.197734 |         |            | 8.191853 |         |            |
| 10148,   | 161956, | 3282.6474, | 10186,   | 162850, | 3280.2942, | 10224,   | 162256, | 3277.9410, |
| 8.203460 |         |            | 8.197579 |         |            | 8.191699 |         |            |
| 10149,   | 161028, | 3282.5855, | 10187,   | 162364, | 3280.2323, | 10225,   | 162660, | 3277.8791, |
| 8.203305 |         |            | 8.197425 |         |            | 8.191544 |         |            |
| 10150,   | 160068, | 3282.5236, | 10188,   | 162096, | 3280.1703, | 10226,   | 162962, | 3277.8171, |
| 8.203151 |         |            | 8.197270 |         |            | 8.191389 |         |            |
| 10151,   | 159336, | 3282.4616, | 10189,   | 162304, | 3280.1084, | 10227,   | 163136, | 3277.7552, |
| 8.202996 |         |            | 8.197115 |         |            | 8.191234 |         |            |
| 10152,   | 158934, | 3282.3997, | 10190,   | 162788, | 3280.0465, | 10228,   | 163118, | 3277.6933, |
| 8.202841 |         |            | 8.196960 |         |            | 8.191080 |         |            |
| 10153,   | 158828, | 3282.3378, | 10191,   | 163092, | 3279.9846, | 10229,   | 162872, | 3277.6313, |
| 8.202686 |         |            | 8.196806 |         |            | 8.190925 |         |            |
| 10154,   | 158978, | 3282.2759, | 10192,   | 162962, | 3279.9226, | 10230,   | 162556, | 3277.5694, |
| 8.202532 |         |            | 8.196651 |         |            | 8.190770 |         |            |

|          |         |            |          |         |            |          |         |            |
|----------|---------|------------|----------|---------|------------|----------|---------|------------|
| 10231,   | 162468, | 3277.5075, | 10269,   | 159668, | 3275.1543, | 10307,   | 163524, | 3272.8010, |
| 8.190615 |         |            | 8.184735 |         |            | 8.178854 |         |            |
| 10232,   | 162764, | 3277.4456, | 10270,   | 159998, | 3275.0923, | 10308,   | 163436, | 3272.7391, |
| 8.190461 |         |            | 8.184580 |         |            | 8.178699 |         |            |
| 10233,   | 163252, | 3277.3836, | 10271,   | 160384, | 3275.0304, | 10309,   | 163658, | 3272.6772, |
| 8.190306 |         |            | 8.184425 |         |            | 8.178544 |         |            |
| 10234,   | 163482, | 3277.3217, | 10272,   | 160594, | 3274.9685, | 10310,   | 163748, | 3272.6153, |
| 8.190151 |         |            | 8.184270 |         |            | 8.178389 |         |            |
| 10235,   | 163152, | 3277.2598, | 10273,   | 160530, | 3274.9066, | 10311,   | 163338, | 3272.5533, |
| 8.189996 |         |            | 8.184116 |         |            | 8.178235 |         |            |
| 10236,   | 162394, | 3277.1979, | 10274,   | 160356, | 3274.8446, | 10312,   | 162470, | 3272.4914, |
| 8.189842 |         |            | 8.183961 |         |            | 8.178080 |         |            |
| 10237,   | 161660, | 3277.1359, | 10275,   | 160304, | 3274.7827, | 10313,   | 161526, | 3272.4295, |
| 8.189687 |         |            | 8.183806 |         |            | 8.177925 |         |            |
| 10238,   | 161342, | 3277.0740, | 10276,   | 160480, | 3274.7208, | 10314,   | 160802, | 3272.3676, |
| 8.189532 |         |            | 8.183651 |         |            | 8.177770 |         |            |
| 10239,   | 161444, | 3277.0121, | 10277,   | 160778, | 3274.6589, | 10315,   | 160332, | 3272.3056, |
| 8.189377 |         |            | 8.183496 |         |            | 8.177616 |         |            |
| 10240,   | 161672, | 3276.9501, | 10278,   | 161054, | 3274.5969, | 10316,   | 160010, | 3272.2437, |
| 8.189223 |         |            | 8.183342 |         |            | 8.177461 |         |            |
| 10241,   | 161770, | 3276.8882, | 10279,   | 161296, | 3274.5350, | 10317,   | 159864, | 3272.1818, |
| 8.189068 |         |            | 8.183187 |         |            | 8.177306 |         |            |
| 10242,   | 161686, | 3276.8263, | 10280,   | 161602, | 3274.4731, | 10318,   | 160026, | 3272.1198, |
| 8.188913 |         |            | 8.183032 |         |            | 8.177151 |         |            |
| 10243,   | 161506, | 3276.7644, | 10281,   | 161950, | 3274.4111, | 10319,   | 160478, | 3272.0579, |
| 8.188758 |         |            | 8.182877 |         |            | 8.176997 |         |            |
| 10244,   | 161258, | 3276.7024, | 10282,   | 162138, | 3274.3492, | 10320,   | 160942, | 3271.9960, |
| 8.188603 |         |            | 8.182723 |         |            | 8.176842 |         |            |
| 10245,   | 160886, | 3276.6405, | 10283,   | 161946, | 3274.2873, | 10321,   | 161096, | 3271.9341, |
| 8.188449 |         |            | 8.182568 |         |            | 8.176687 |         |            |
| 10246,   | 160394, | 3276.5786, | 10284,   | 161386, | 3274.2254, | 10322,   | 160954, | 3271.8721, |
| 8.188294 |         |            | 8.182413 |         |            | 8.176532 |         |            |
| 10247,   | 159944, | 3276.5167, | 10285,   | 160722, | 3274.1634, | 10323,   | 160888, | 3271.8102, |
| 8.188139 |         |            | 8.182258 |         |            | 8.176378 |         |            |
| 10248,   | 159744, | 3276.4547, | 10286,   | 160240, | 3274.1015, | 10324,   | 161290, | 3271.7483, |
| 8.187984 |         |            | 8.182104 |         |            | 8.176223 |         |            |
| 10249,   | 159816, | 3276.3928, | 10287,   | 159998, | 3274.0396, | 10325,   | 162116, | 3271.6864, |
| 8.187830 |         |            | 8.181949 |         |            | 8.176068 |         |            |
| 10250,   | 159976, | 3276.3309, | 10288,   | 159858, | 3273.9777, | 10326,   | 162928, | 3271.6244, |
| 8.187675 |         |            | 8.181794 |         |            | 8.175913 |         |            |
| 10251,   | 160006, | 3276.2690, | 10289,   | 159736, | 3273.9157, | 10327,   | 163342, | 3271.5625, |
| 8.187520 |         |            | 8.181639 |         |            | 8.175759 |         |            |
| 10252,   | 159886, | 3276.2070, | 10290,   | 159752, | 3273.8538, | 10328,   | 163382, | 3271.5006, |
| 8.187365 |         |            | 8.181485 |         |            | 8.175604 |         |            |
| 10253,   | 159792, | 3276.1451, | 10291,   | 160064, | 3273.7919, | 10329,   | 163400, | 3271.4387, |
| 8.187211 |         |            | 8.181330 |         |            | 8.175449 |         |            |
| 10254,   | 159854, | 3276.0832, | 10292,   | 160628, | 3273.7299, | 10330,   | 163588, | 3271.3767, |
| 8.187056 |         |            | 8.181175 |         |            | 8.175294 |         |            |
| 10255,   | 160000, | 3276.0212, | 10293,   | 161176, | 3273.6680, | 10331,   | 163724, | 3271.3148, |
| 8.186901 |         |            | 8.181020 |         |            | 8.175140 |         |            |
| 10256,   | 160038, | 3275.9593, | 10294,   | 161494, | 3273.6061, | 10332,   | 163436, | 3271.2529, |
| 8.186746 |         |            | 8.180866 |         |            | 8.174985 |         |            |
| 10257,   | 159926, | 3275.8974, | 10295,   | 161638, | 3273.5442, | 10333,   | 162678, | 3271.1909, |
| 8.186592 |         |            | 8.180711 |         |            | 8.174830 |         |            |
| 10258,   | 159812, | 3275.8355, | 10296,   | 161886, | 3273.4822, | 10334,   | 161890, | 3271.1290, |
| 8.186437 |         |            | 8.180556 |         |            | 8.174675 |         |            |
| 10259,   | 159914, | 3275.7735, | 10297,   | 162354, | 3273.4203, | 10335,   | 161598, | 3271.0671, |
| 8.186282 |         |            | 8.180401 |         |            | 8.174521 |         |            |
| 10260,   | 160214, | 3275.7116, | 10298,   | 162820, | 3273.3584, | 10336,   | 161908, | 3271.0052, |
| 8.186127 |         |            | 8.180247 |         |            | 8.174366 |         |            |
| 10261,   | 160492, | 3275.6497, | 10299,   | 162936, | 3273.2965, | 10337,   | 162410, | 3270.9432, |
| 8.185973 |         |            | 8.180092 |         |            | 8.174211 |         |            |
| 10262,   | 160504, | 3275.5878, | 10300,   | 162672, | 3273.2345, | 10338,   | 162630, | 3270.8813, |
| 8.185818 |         |            | 8.179937 |         |            | 8.174056 |         |            |
| 10263,   | 160246, | 3275.5258, | 10301,   | 162420, | 3273.1726, | 10339,   | 162486, | 3270.8194, |
| 8.185663 |         |            | 8.179782 |         |            | 8.173902 |         |            |
| 10264,   | 159918, | 3275.4639, | 10302,   | 162640, | 3273.1107, | 10340,   | 162306, | 3270.7575, |
| 8.185508 |         |            | 8.179628 |         |            | 8.173747 |         |            |
| 10265,   | 159698, | 3275.4020, | 10303,   | 163346, | 3273.0488, | 10341,   | 162390, | 3270.6955, |
| 8.185354 |         |            | 8.179473 |         |            | 8.173592 |         |            |
| 10266,   | 159598, | 3275.3400, | 10304,   | 164060, | 3272.9868, | 10342,   | 162702, | 3270.6336, |
| 8.185199 |         |            | 8.179318 |         |            | 8.173437 |         |            |
| 10267,   | 159544, | 3275.2781, | 10305,   | 164274, | 3272.9249, | 10343,   | 162942, | 3270.5717, |
| 8.185044 |         |            | 8.179163 |         |            | 8.173282 |         |            |
| 10268,   | 159530, | 3275.2162, | 10306,   | 163950, | 3272.8630, | 10344,   | 162962, | 3270.5097, |
| 8.184889 |         |            | 8.179009 |         |            | 8.173128 |         |            |

|          |         |            |          |         |            |          |         |            |
|----------|---------|------------|----------|---------|------------|----------|---------|------------|
| 10345,   | 162936, | 3270.4478, | 10383,   | 159854, | 3268.0946, | 10421,   | 161300, | 3265.7414, |
| 8.172973 |         |            | 8.167092 |         |            | 8.161211 |         |            |
| 10346,   | 163136, | 3270.3859, | 10384,   | 160518, | 3268.0327, | 10422,   | 161748, | 3265.6795, |
| 8.172818 |         |            | 8.166937 |         |            | 8.161057 |         |            |
| 10347,   | 163552, | 3270.3240, | 10385,   | 161222, | 3267.9707, | 10423,   | 162492, | 3265.6175, |
| 8.172663 |         |            | 8.166783 |         |            | 8.160902 |         |            |
| 10348,   | 163858, | 3270.2620, | 10386,   | 161318, | 3267.9088, | 10424,   | 163002, | 3265.5556, |
| 8.172509 |         |            | 8.166628 |         |            | 8.160747 |         |            |
| 10349,   | 163762, | 3270.2001, | 10387,   | 160662, | 3267.8469, | 10425,   | 162964, | 3265.4937, |
| 8.172354 |         |            | 8.166473 |         |            | 8.160592 |         |            |
| 10350,   | 163332, | 3270.1382, | 10388,   | 159762, | 3267.7850, | 10426,   | 162558, | 3265.4317, |
| 8.172199 |         |            | 8.166318 |         |            | 8.160438 |         |            |
| 10351,   | 162992, | 3270.0763, | 10389,   | 159326, | 3267.7230, | 10427,   | 162244, | 3265.3698, |
| 8.172044 |         |            | 8.166164 |         |            | 8.160283 |         |            |
| 10352,   | 163090, | 3270.0143, | 10390,   | 159662, | 3267.6611, | 10428,   | 162270, | 3265.3079, |
| 8.171890 |         |            | 8.166009 |         |            | 8.160128 |         |            |
| 10353,   | 163592, | 3269.9524, | 10391,   | 160540, | 3267.5992, | 10429,   | 162416, | 3265.2460, |
| 8.171735 |         |            | 8.165854 |         |            | 8.159973 |         |            |
| 10354,   | 164120, | 3269.8905, | 10392,   | 161506, | 3267.5373, | 10430,   | 162266, | 3265.1840, |
| 8.171580 |         |            | 8.165699 |         |            | 8.159819 |         |            |
| 10355,   | 164324, | 3269.8286, | 10393,   | 162332, | 3267.4753, | 10431,   | 161658, | 3265.1221, |
| 8.171425 |         |            | 8.165545 |         |            | 8.159664 |         |            |
| 10356,   | 164132, | 3269.7666, | 10394,   | 163050, | 3267.4134, | 10432,   | 160886, | 3265.0602, |
| 8.171271 |         |            | 8.165390 |         |            | 8.159509 |         |            |
| 10357,   | 163722, | 3269.7047, | 10395,   | 163686, | 3267.3515, | 10433,   | 160370, | 3264.9983, |
| 8.171116 |         |            | 8.165235 |         |            | 8.159354 |         |            |
| 10358,   | 163302, | 3269.6428, | 10396,   | 164034, | 3267.2896, | 10434,   | 160286, | 3264.9363, |
| 8.170961 |         |            | 8.165080 |         |            | 8.159200 |         |            |
| 10359,   | 162978, | 3269.5808, | 10397,   | 163830, | 3267.2276, | 10435,   | 160434, | 3264.8744, |
| 8.170806 |         |            | 8.164926 |         |            | 8.159045 |         |            |
| 10360,   | 162796, | 3269.5189, | 10398,   | 163120, | 3267.1657, | 10436,   | 160514, | 3264.8125, |
| 8.170652 |         |            | 8.164771 |         |            | 8.158890 |         |            |
| 10361,   | 162814, | 3269.4570, | 10399,   | 162304, | 3267.1038, | 10437,   | 160416, | 3264.7505, |
| 8.170497 |         |            | 8.164616 |         |            | 8.158735 |         |            |
| 10362,   | 163028, | 3269.3951, | 10400,   | 161824, | 3267.0418, | 10438,   | 160278, | 3264.6886, |
| 8.170342 |         |            | 8.164461 |         |            | 8.158580 |         |            |
| 10363,   | 163312, | 3269.3331, | 10401,   | 161770, | 3266.9799, | 10439,   | 160270, | 3264.6267, |
| 8.170187 |         |            | 8.164307 |         |            | 8.158426 |         |            |
| 10364,   | 163442, | 3269.2712, | 10402,   | 161816, | 3266.9180, | 10440,   | 160424, | 3264.5648, |
| 8.170033 |         |            | 8.164152 |         |            | 8.158271 |         |            |
| 10365,   | 163298, | 3269.2093, | 10403,   | 161624, | 3266.8561, | 10441,   | 160662, | 3264.5028, |
| 8.169878 |         |            | 8.163997 |         |            | 8.158116 |         |            |
| 10366,   | 162978, | 3269.1474, | 10404,   | 161186, | 3266.7941, | 10442,   | 160906, | 3264.4409, |
| 8.169723 |         |            | 8.163842 |         |            | 8.157961 |         |            |
| 10367,   | 162706, | 3269.0854, | 10405,   | 160798, | 3266.7322, | 10443,   | 161138, | 3264.3790, |
| 8.169568 |         |            | 8.163688 |         |            | 8.157807 |         |            |
| 10368,   | 162604, | 3269.0235, | 10406,   | 160696, | 3266.6703, | 10444,   | 161312, | 3264.3171, |
| 8.169414 |         |            | 8.163533 |         |            | 8.157652 |         |            |
| 10369,   | 162584, | 3268.9616, | 10407,   | 160812, | 3266.6084, | 10445,   | 161348, | 3264.2551, |
| 8.169259 |         |            | 8.163378 |         |            | 8.157497 |         |            |
| 10370,   | 162468, | 3268.8996, | 10408,   | 160930, | 3266.5464, | 10446,   | 161198, | 3264.1932, |
| 8.169104 |         |            | 8.163223 |         |            | 8.157342 |         |            |
| 10371,   | 162236, | 3268.8377, | 10409,   | 160986, | 3266.4845, | 10447,   | 160970, | 3264.1313, |
| 8.168949 |         |            | 8.163068 |         |            | 8.157188 |         |            |
| 10372,   | 162034, | 3268.7758, | 10410,   | 161174, | 3266.4226, | 10448,   | 160868, | 3264.0694, |
| 8.168795 |         |            | 8.162914 |         |            | 8.157033 |         |            |
| 10373,   | 162006, | 3268.7139, | 10411,   | 161682, | 3266.3606, | 10449,   | 160996, | 3264.0074, |
| 8.168640 |         |            | 8.162759 |         |            | 8.156878 |         |            |
| 10374,   | 162146, | 3268.6519, | 10412,   | 162406, | 3266.2987, | 10450,   | 161264, | 3263.9455, |
| 8.168485 |         |            | 8.162604 |         |            | 8.156723 |         |            |
| 10375,   | 162298, | 3268.5900, | 10413,   | 162990, | 3266.2368, | 10451,   | 161484, | 3263.8836, |
| 8.168330 |         |            | 8.162449 |         |            | 8.156569 |         |            |
| 10376,   | 162358, | 3268.5281, | 10414,   | 163170, | 3266.1749, | 10452,   | 161636, | 3263.8216, |
| 8.168175 |         |            | 8.162295 |         |            | 8.156414 |         |            |
| 10377,   | 162332, | 3268.4662, | 10415,   | 162998, | 3266.1129, | 10453,   | 161900, | 3263.7597, |
| 8.168021 |         |            | 8.162140 |         |            | 8.156259 |         |            |
| 10378,   | 162206, | 3268.4042, | 10416,   | 162736, | 3266.0510, | 10454,   | 162488, | 3263.6978, |
| 8.167866 |         |            | 8.161985 |         |            | 8.156104 |         |            |
| 10379,   | 161870, | 3268.3423, | 10417,   | 162530, | 3265.9891, | 10455,   | 163340, | 3263.6359, |
| 8.167711 |         |            | 8.161830 |         |            | 8.155950 |         |            |
| 10380,   | 161218, | 3268.2804, | 10418,   | 162270, | 3265.9272, | 10456,   | 164118, | 3263.5739, |
| 8.167556 |         |            | 8.161676 |         |            | 8.155795 |         |            |
| 10381,   | 160380, | 3268.2185, | 10419,   | 161842, | 3265.8652, | 10457,   | 164488, | 3263.5120, |
| 8.167402 |         |            | 8.161521 |         |            | 8.155640 |         |            |
| 10382,   | 159792, | 3268.1565, | 10420,   | 161402, | 3265.8033, | 10458,   | 164428, | 3263.4501, |
| 8.167247 |         |            | 8.161366 |         |            | 8.155485 |         |            |

|          |         |            |          |         |            |          |         |            |
|----------|---------|------------|----------|---------|------------|----------|---------|------------|
| 10459,   | 164220, | 3263.3882, | 10497,   | 164654, | 3261.0349, | 10535,   | 162716, | 3258.6817, |
| 8.155331 |         |            | 8.149450 |         |            | 8.143569 |         |            |
| 10460,   | 164158, | 3263.3262, | 10498,   | 164294, | 3260.9730, | 10536,   | 162820, | 3258.6198, |
| 8.155176 |         |            | 8.149295 |         |            | 8.143414 |         |            |
| 10461,   | 164276, | 3263.2643, | 10499,   | 163886, | 3260.9111, | 10537,   | 162890, | 3258.5579, |
| 8.155021 |         |            | 8.149140 |         |            | 8.143259 |         |            |
| 10462,   | 164396, | 3263.2024, | 10500,   | 163290, | 3260.8492, | 10538,   | 162848, | 3258.4959, |
| 8.154866 |         |            | 8.148986 |         |            | 8.143105 |         |            |
| 10463,   | 164368, | 3263.1404, | 10501,   | 162536, | 3260.7872, | 10539,   | 162778, | 3258.4340, |
| 8.154712 |         |            | 8.148831 |         |            | 8.142950 |         |            |
| 10464,   | 164236, | 3263.0785, | 10502,   | 161862, | 3260.7253, | 10540,   | 162836, | 3258.3721, |
| 8.154557 |         |            | 8.148676 |         |            | 8.142795 |         |            |
| 10465,   | 164132, | 3263.0166, | 10503,   | 161504, | 3260.6634, | 10541,   | 163114, | 3258.3101, |
| 8.154402 |         |            | 8.148521 |         |            | 8.142640 |         |            |
| 10466,   | 164070, | 3262.9547, | 10504,   | 161454, | 3260.6014, | 10542,   | 163520, | 3258.2482, |
| 8.154247 |         |            | 8.148366 |         |            | 8.142486 |         |            |
| 10467,   | 163932, | 3262.8927, | 10505,   | 161564, | 3260.5395, | 10543,   | 163908, | 3258.1863, |
| 8.154093 |         |            | 8.148212 |         |            | 8.142331 |         |            |
| 10468,   | 163650, | 3262.8308, | 10506,   | 161738, | 3260.4776, | 10544,   | 164226, | 3258.1244, |
| 8.153938 |         |            | 8.148057 |         |            | 8.142176 |         |            |
| 10469,   | 163366, | 3262.7689, | 10507,   | 162062, | 3260.4157, | 10545,   | 164544, | 3258.0624, |
| 8.153783 |         |            | 8.147902 |         |            | 8.142021 |         |            |
| 10470,   | 163344, | 3262.7070, | 10508,   | 162620, | 3260.3537, | 10546,   | 164912, | 3258.0005, |
| 8.153628 |         |            | 8.147747 |         |            | 8.141867 |         |            |
| 10471,   | 163676, | 3262.6450, | 10509,   | 163268, | 3260.2918, | 10547,   | 165258, | 3257.9386, |
| 8.153473 |         |            | 8.147593 |         |            | 8.141712 |         |            |
| 10472,   | 164098, | 3262.5831, | 10510,   | 163652, | 3260.2299, | 10548,   | 165438, | 3257.8767, |
| 8.153319 |         |            | 8.147438 |         |            | 8.141557 |         |            |
| 10473,   | 164194, | 3262.5212, | 10511,   | 163508, | 3260.1680, | 10549,   | 165398, | 3257.8147, |
| 8.153164 |         |            | 8.147283 |         |            | 8.141402 |         |            |
| 10474,   | 163728, | 3262.4593, | 10512,   | 162932, | 3260.1060, | 10550,   | 165280, | 3257.7528, |
| 8.153009 |         |            | 8.147128 |         |            | 8.141248 |         |            |
| 10475,   | 162854, | 3262.3973, | 10513,   | 162298, | 3260.0441, | 10551,   | 165244, | 3257.6909, |
| 8.152854 |         |            | 8.146974 |         |            | 8.141093 |         |            |
| 10476,   | 161944, | 3262.3354, | 10514,   | 161902, | 3259.9822, | 10552,   | 165240, | 3257.6290, |
| 8.152700 |         |            | 8.146819 |         |            | 8.140938 |         |            |
| 10477,   | 161298, | 3262.2735, | 10515,   | 161724, | 3259.9202, | 10553,   | 165044, | 3257.5670, |
| 8.152545 |         |            | 8.146664 |         |            | 8.140783 |         |            |
| 10478,   | 160978, | 3262.2115, | 10516,   | 161538, | 3259.8583, | 10554,   | 164488, | 3257.5051, |
| 8.152390 |         |            | 8.146509 |         |            | 8.140629 |         |            |
| 10479,   | 160900, | 3262.1496, | 10517,   | 161308, | 3259.7964, | 10555,   | 163740, | 3257.4432, |
| 8.152235 |         |            | 8.146355 |         |            | 8.140474 |         |            |
| 10480,   | 161054, | 3262.0877, | 10518,   | 161320, | 3259.7345, | 10556,   | 163266, | 3257.3812, |
| 8.152081 |         |            | 8.146200 |         |            | 8.140319 |         |            |
| 10481,   | 161502, | 3262.0258, | 10519,   | 161944, | 3259.6725, | 10557,   | 163458, | 3257.3193, |
| 8.151926 |         |            | 8.146045 |         |            | 8.140164 |         |            |
| 10482,   | 162286, | 3261.9638, | 10520,   | 163178, | 3259.6106, | 10558,   | 164326, | 3257.2574, |
| 8.151771 |         |            | 8.145890 |         |            | 8.140010 |         |            |
| 10483,   | 163288, | 3261.9019, | 10521,   | 164540, | 3259.5487, | 10559,   | 165462, | 3257.1955, |
| 8.151616 |         |            | 8.145736 |         |            | 8.139855 |         |            |
| 10484,   | 164286, | 3261.8400, | 10522,   | 165392, | 3259.4868, | 10560,   | 166374, | 3257.1335, |
| 8.151462 |         |            | 8.145581 |         |            | 8.139700 |         |            |
| 10485,   | 165020, | 3261.7781, | 10523,   | 165444, | 3259.4248, | 10561,   | 166764, | 3257.0716, |
| 8.151307 |         |            | 8.145426 |         |            | 8.139545 |         |            |
| 10486,   | 165328, | 3261.7161, | 10524,   | 164928, | 3259.3629, | 10562,   | 166624, | 3257.0097, |
| 8.151152 |         |            | 8.145271 |         |            | 8.139391 |         |            |
| 10487,   | 165142, | 3261.6542, | 10525,   | 164368, | 3259.3010, | 10563,   | 166056, | 3256.9478, |
| 8.150997 |         |            | 8.145117 |         |            | 8.139236 |         |            |
| 10488,   | 164530, | 3261.5923, | 10526,   | 164130, | 3259.2391, | 10564,   | 165180, | 3256.8858, |
| 8.150843 |         |            | 8.144962 |         |            | 8.139081 |         |            |
| 10489,   | 163726, | 3261.5303, | 10527,   | 164200, | 3259.1771, | 10565,   | 164166, | 3256.8239, |
| 8.150688 |         |            | 8.144807 |         |            | 8.138926 |         |            |
| 10490,   | 163126, | 3261.4684, | 10528,   | 164338, | 3259.1152, | 10566,   | 163270, | 3256.7620, |
| 8.150533 |         |            | 8.144652 |         |            | 8.138772 |         |            |
| 10491,   | 163084, | 3261.4065, | 10529,   | 164318, | 3259.0533, | 10567,   | 162752, | 3256.7000, |
| 8.150378 |         |            | 8.144498 |         |            | 8.138617 |         |            |
| 10492,   | 163656, | 3261.3446, | 10530,   | 164082, | 3258.9913, | 10568,   | 162660, | 3256.6381, |
| 8.150224 |         |            | 8.144343 |         |            | 8.138462 |         |            |
| 10493,   | 164514, | 3261.2826, | 10531,   | 163698, | 3258.9294, | 10569,   | 162742, | 3256.5762, |
| 8.150069 |         |            | 8.144188 |         |            | 8.138307 |         |            |
| 10494,   | 165166, | 3261.2207, | 10532,   | 163272, | 3258.8675, | 10570,   | 162660, | 3256.5143, |
| 8.149914 |         |            | 8.144033 |         |            | 8.138152 |         |            |
| 10495,   | 165322, | 3261.1588, | 10533,   | 162916, | 3258.8056, | 10571,   | 162298, | 3256.4523, |
| 8.149759 |         |            | 8.143879 |         |            | 8.137998 |         |            |
| 10496,   | 165054, | 3261.0969, | 10534,   | 162720, | 3258.7436, | 10572,   | 161834, | 3256.3904, |
| 8.149605 |         |            | 8.143724 |         |            | 8.137843 |         |            |



|          |         |            |          |         |            |          |         |            |
|----------|---------|------------|----------|---------|------------|----------|---------|------------|
| 10573,   | 161530, | 3256.3285, | 10611,   | 164604, | 3253.9753, | 10649,   | 166586, | 3251.6220, |
| 8.137688 |         |            | 8.131807 |         |            | 8.125927 |         |            |
| 10574,   | 161466, | 3256.2666, | 10612,   | 165158, | 3253.9133, | 10650,   | 166930, | 3251.5601, |
| 8.137533 |         |            | 8.131653 |         |            | 8.125772 |         |            |
| 10575,   | 161478, | 3256.2046, | 10613,   | 165700, | 3253.8514, | 10651,   | 167342, | 3251.4982, |
| 8.137379 |         |            | 8.131498 |         |            | 8.125617 |         |            |
| 10576,   | 161388, | 3256.1427, | 10614,   | 165840, | 3253.7895, | 10652,   | 167618, | 3251.4363, |
| 8.137224 |         |            | 8.131343 |         |            | 8.125462 |         |            |
| 10577,   | 161240, | 3256.0808, | 10615,   | 165608, | 3253.7276, | 10653,   | 167570, | 3251.3743, |
| 8.137069 |         |            | 8.131188 |         |            | 8.125308 |         |            |
| 10578,   | 161272, | 3256.0189, | 10616,   | 165344, | 3253.6656, | 10654,   | 167148, | 3251.3124, |
| 8.136914 |         |            | 8.131034 |         |            | 8.125153 |         |            |
| 10579,   | 161638, | 3255.9569, | 10617,   | 165284, | 3253.6037, | 10655,   | 166440, | 3251.2505, |
| 8.136760 |         |            | 8.130879 |         |            | 8.124998 |         |            |
| 10580,   | 162246, | 3255.8950, | 10618,   | 165342, | 3253.5418, | 10656,   | 165660, | 3251.1886, |
| 8.136605 |         |            | 8.130724 |         |            | 8.124843 |         |            |
| 10581,   | 162838, | 3255.8331, | 10619,   | 165236, | 3253.4799, | 10657,   | 165070, | 3251.1266, |
| 8.136450 |         |            | 8.130569 |         |            | 8.124689 |         |            |
| 10582,   | 163224, | 3255.7711, | 10620,   | 164830, | 3253.4179, | 10658,   | 164860, | 3251.0647, |
| 8.136295 |         |            | 8.130415 |         |            | 8.124534 |         |            |
| 10583,   | 163420, | 3255.7092, | 10621,   | 164296, | 3253.3560, | 10659,   | 164976, | 3251.0028, |
| 8.136141 |         |            | 8.130260 |         |            | 8.124379 |         |            |
| 10584,   | 163536, | 3255.6473, | 10622,   | 163880, | 3253.2941, | 10660,   | 165114, | 3250.9408, |
| 8.135986 |         |            | 8.130105 |         |            | 8.124224 |         |            |
| 10585,   | 163620, | 3255.5854, | 10623,   | 163630, | 3253.2321, | 10661,   | 164930, | 3250.8789, |
| 8.135831 |         |            | 8.129950 |         |            | 8.124070 |         |            |
| 10586,   | 163636, | 3255.5234, | 10624,   | 163410, | 3253.1702, | 10662,   | 164352, | 3250.8170, |
| 8.135676 |         |            | 8.129796 |         |            | 8.123915 |         |            |
| 10587,   | 163614, | 3255.4615, | 10625,   | 163124, | 3253.1083, | 10663,   | 163728, | 3250.7551, |
| 8.135522 |         |            | 8.129641 |         |            | 8.123760 |         |            |
| 10588,   | 163720, | 3255.3996, | 10626,   | 162952, | 3253.0464, | 10664,   | 163522, | 3250.6931, |
| 8.135367 |         |            | 8.129486 |         |            | 8.123605 |         |            |
| 10589,   | 164092, | 3255.3377, | 10627,   | 163230, | 3252.9844, | 10665,   | 163892, | 3250.6312, |
| 8.135212 |         |            | 8.129331 |         |            | 8.123451 |         |            |
| 10590,   | 164618, | 3255.2757, | 10628,   | 164114, | 3252.9225, | 10666,   | 164494, | 3250.5693, |
| 8.135057 |         |            | 8.129177 |         |            | 8.123296 |         |            |
| 10591,   | 164968, | 3255.2138, | 10629,   | 165384, | 3252.8606, | 10667,   | 164776, | 3250.5074, |
| 8.134903 |         |            | 8.129022 |         |            | 8.123141 |         |            |
| 10592,   | 164826, | 3255.1519, | 10630,   | 166586, | 3252.7987, | 10668,   | 164440, | 3250.4454, |
| 8.134748 |         |            | 8.128867 |         |            | 8.122986 |         |            |
| 10593,   | 164192, | 3255.0900, | 10631,   | 167368, | 3252.7367, | 10669,   | 163724, | 3250.3835, |
| 8.134593 |         |            | 8.128712 |         |            | 8.122831 |         |            |
| 10594,   | 163400, | 3255.0280, | 10632,   | 167648, | 3252.6748, | 10670,   | 163118, | 3250.3216, |
| 8.134438 |         |            | 8.128558 |         |            | 8.122677 |         |            |
| 10595,   | 162828, | 3254.9661, | 10633,   | 167554, | 3252.6129, | 10671,   | 162930, | 3250.2597, |
| 8.134284 |         |            | 8.128403 |         |            | 8.122522 |         |            |
| 10596,   | 162612, | 3254.9042, | 10634,   | 167196, | 3252.5509, | 10672,   | 163044, | 3250.1977, |
| 8.134129 |         |            | 8.128248 |         |            | 8.122367 |         |            |
| 10597,   | 162634, | 3254.8422, | 10635,   | 166612, | 3252.4890, | 10673,   | 163154, | 3250.1358, |
| 8.133974 |         |            | 8.128093 |         |            | 8.122212 |         |            |
| 10598,   | 162730, | 3254.7803, | 10636,   | 165874, | 3252.4271, | 10674,   | 163108, | 3250.0739, |
| 8.133819 |         |            | 8.127938 |         |            | 8.122058 |         |            |
| 10599,   | 162892, | 3254.7184, | 10637,   | 165128, | 3252.3652, | 10675,   | 163002, | 3250.0119, |
| 8.133665 |         |            | 8.127784 |         |            | 8.121903 |         |            |
| 10600,   | 163214, | 3254.6565, | 10638,   | 164558, | 3252.3032, | 10676,   | 162996, | 3249.9500, |
| 8.133510 |         |            | 8.127629 |         |            | 8.121748 |         |            |
| 10601,   | 163720, | 3254.5945, | 10639,   | 164198, | 3252.2413, | 10677,   | 163116, | 3249.8881, |
| 8.133355 |         |            | 8.127474 |         |            | 8.121593 |         |            |
| 10602,   | 164334, | 3254.5326, | 10640,   | 163960, | 3252.1794, | 10678,   | 163266, | 3249.8262, |
| 8.133200 |         |            | 8.127319 |         |            | 8.121439 |         |            |
| 10603,   | 164948, | 3254.4707, | 10641,   | 163748, | 3252.1175, | 10679,   | 163454, | 3249.7642, |
| 8.133045 |         |            | 8.127165 |         |            | 8.121284 |         |            |
| 10604,   | 165532, | 3254.4088, | 10642,   | 163644, | 3252.0555, | 10680,   | 163812, | 3249.7023, |
| 8.132891 |         |            | 8.127010 |         |            | 8.121129 |         |            |
| 10605,   | 166070, | 3254.3468, | 10643,   | 163830, | 3251.9936, | 10681,   | 164416, | 3249.6404, |
| 8.132736 |         |            | 8.126855 |         |            | 8.120974 |         |            |
| 10606,   | 166424, | 3254.2849, | 10644,   | 164378, | 3251.9317, | 10682,   | 165054, | 3249.5785, |
| 8.132581 |         |            | 8.126700 |         |            | 8.120820 |         |            |
| 10607,   | 166364, | 3254.2230, | 10645,   | 165128, | 3251.8698, | 10683,   | 165326, | 3249.5165, |
| 8.132426 |         |            | 8.126546 |         |            | 8.120665 |         |            |
| 10608,   | 165808, | 3254.1610, | 10646,   | 165794, | 3251.8078, | 10684,   | 164996, | 3249.4546, |
| 8.132272 |         |            | 8.126391 |         |            | 8.120510 |         |            |
| 10609,   | 165028, | 3254.0991, | 10647,   | 166186, | 3251.7459, | 10685,   | 164260, | 3249.3927, |
| 8.132117 |         |            | 8.126236 |         |            | 8.120355 |         |            |
| 10610,   | 164514, | 3254.0372, | 10648,   | 166378, | 3251.6840, | 10686,   | 163582, | 3249.3307, |
| 8.131962 |         |            | 8.126081 |         |            | 8.120201 |         |            |

|          |         |            |          |         |            |          |         |            |
|----------|---------|------------|----------|---------|------------|----------|---------|------------|
| 10687,   | 163270, | 3249.2688, | 10725,   | 164766, | 3246.9156, | 10763,   | 164780, | 3244.5624, |
| 8.120046 |         |            | 8.114165 |         |            | 8.108284 |         |            |
| 10688,   | 163248, | 3249.2069, | 10726,   | 166138, | 3246.8537, | 10764,   | 164604, | 3244.5004, |
| 8.119891 |         |            | 8.114010 |         |            | 8.108129 |         |            |
| 10689,   | 163220, | 3249.1450, | 10727,   | 166850, | 3246.7917, | 10765,   | 164640, | 3244.4385, |
| 8.119736 |         |            | 8.113856 |         |            | 8.107975 |         |            |
| 10690,   | 163032, | 3249.0830, | 10728,   | 166596, | 3246.7298, | 10766,   | 164870, | 3244.3766, |
| 8.119582 |         |            | 8.113701 |         |            | 8.107820 |         |            |
| 10691,   | 162828, | 3249.0211, | 10729,   | 165810, | 3246.6679, | 10767,   | 165290, | 3244.3147, |
| 8.119427 |         |            | 8.113546 |         |            | 8.107665 |         |            |
| 10692,   | 162798, | 3248.9592, | 10730,   | 165276, | 3246.6060, | 10768,   | 165868, | 3244.2527, |
| 8.119272 |         |            | 8.113391 |         |            | 8.107510 |         |            |
| 10693,   | 162912, | 3248.8973, | 10731,   | 165394, | 3246.5440, | 10769,   | 166442, | 3244.1908, |
| 8.119117 |         |            | 8.113236 |         |            | 8.107356 |         |            |
| 10694,   | 162968, | 3248.8353, | 10732,   | 165894, | 3246.4821, | 10770,   | 166744, | 3244.1289, |
| 8.118963 |         |            | 8.113082 |         |            | 8.107201 |         |            |
| 10695,   | 162910, | 3248.7734, | 10733,   | 166178, | 3246.4202, | 10771,   | 166612, | 3244.0670, |
| 8.118808 |         |            | 8.112927 |         |            | 8.107046 |         |            |
| 10696,   | 162982, | 3248.7115, | 10734,   | 165926, | 3246.3583, | 10772,   | 166094, | 3244.0050, |
| 8.118653 |         |            | 8.112772 |         |            | 8.106891 |         |            |
| 10697,   | 163500, | 3248.6496, | 10735,   | 165364, | 3246.2963, | 10773,   | 165414, | 3243.9431, |
| 8.118498 |         |            | 8.112617 |         |            | 8.106737 |         |            |
| 10698,   | 164430, | 3248.5876, | 10736,   | 164940, | 3246.2344, | 10774,   | 164780, | 3243.8812, |
| 8.118344 |         |            | 8.112463 |         |            | 8.106582 |         |            |
| 10699,   | 165306, | 3248.5257, | 10737,   | 164858, | 3246.1725, | 10775,   | 164270, | 3243.8193, |
| 8.118189 |         |            | 8.112308 |         |            | 8.106427 |         |            |
| 10700,   | 165652, | 3248.4638, | 10738,   | 164934, | 3246.1105, | 10776,   | 163874, | 3243.7573, |
| 8.118034 |         |            | 8.112153 |         |            | 8.106272 |         |            |
| 10701,   | 165476, | 3248.4018, | 10739,   | 164890, | 3246.0486, | 10777,   | 163588, | 3243.6954, |
| 8.117879 |         |            | 8.111998 |         |            | 8.106118 |         |            |
| 10702,   | 165270, | 3248.3399, | 10740,   | 164682, | 3245.9867, | 10778,   | 163430, | 3243.6335, |
| 8.117724 |         |            | 8.111844 |         |            | 8.105963 |         |            |
| 10703,   | 165492, | 3248.2780, | 10741,   | 164502, | 3245.9248, | 10779,   | 163350, | 3243.5715, |
| 8.117570 |         |            | 8.111689 |         |            | 8.105808 |         |            |
| 10704,   | 166022, | 3248.2161, | 10742,   | 164498, | 3245.8628, | 10780,   | 163228, | 3243.5096, |
| 8.117415 |         |            | 8.111534 |         |            | 8.105653 |         |            |
| 10705,   | 166240, | 3248.1541, | 10743,   | 164600, | 3245.8009, | 10781,   | 163002, | 3243.4477, |
| 8.117260 |         |            | 8.111379 |         |            | 8.105499 |         |            |
| 10706,   | 165660, | 3248.0922, | 10744,   | 164624, | 3245.7390, | 10782,   | 162794, | 3243.3858, |
| 8.117105 |         |            | 8.111225 |         |            | 8.105344 |         |            |
| 10707,   | 164486, | 3248.0303, | 10745,   | 164526, | 3245.6771, | 10783,   | 162860, | 3243.3238, |
| 8.116951 |         |            | 8.111070 |         |            | 8.105189 |         |            |
| 10708,   | 163468, | 3247.9684, | 10746,   | 164456, | 3245.6151, | 10784,   | 163308, | 3243.2619, |
| 8.116796 |         |            | 8.110915 |         |            | 8.105034 |         |            |
| 10709,   | 163260, | 3247.9064, | 10747,   | 164578, | 3245.5532, | 10785,   | 163914, | 3243.2000, |
| 8.116641 |         |            | 8.110760 |         |            | 8.104880 |         |            |
| 10710,   | 163864, | 3247.8445, | 10748,   | 164880, | 3245.4913, | 10786,   | 164272, | 3243.1381, |
| 8.116486 |         |            | 8.110606 |         |            | 8.104725 |         |            |
| 10711,   | 164700, | 3247.7826, | 10749,   | 165208, | 3245.4294, | 10787,   | 164170, | 3243.0761, |
| 8.116332 |         |            | 8.110451 |         |            | 8.104570 |         |            |
| 10712,   | 165180, | 3247.7206, | 10750,   | 165474, | 3245.3674, | 10788,   | 163818, | 3243.0142, |
| 8.116177 |         |            | 8.110296 |         |            | 8.104415 |         |            |
| 10713,   | 165158, | 3247.6587, | 10751,   | 165780, | 3245.3055, | 10789,   | 163616, | 3242.9523, |
| 8.116022 |         |            | 8.110141 |         |            | 8.104261 |         |            |
| 10714,   | 164876, | 3247.5968, | 10752,   | 166248, | 3245.2436, | 10790,   | 163770, | 3242.8903, |
| 8.115867 |         |            | 8.109987 |         |            | 8.104106 |         |            |
| 10715,   | 164618, | 3247.5349, | 10753,   | 166828, | 3245.1816, | 10791,   | 164060, | 3242.8284, |
| 8.115713 |         |            | 8.109832 |         |            | 8.103951 |         |            |
| 10716,   | 164472, | 3247.4729, | 10754,   | 167258, | 3245.1197, | 10792,   | 164140, | 3242.7665, |
| 8.115558 |         |            | 8.109677 |         |            | 8.103796 |         |            |
| 10717,   | 164370, | 3247.4110, | 10755,   | 167304, | 3245.0578, | 10793,   | 163922, | 3242.7046, |
| 8.115403 |         |            | 8.109522 |         |            | 8.103642 |         |            |
| 10718,   | 164258, | 3247.3491, | 10756,   | 166994, | 3244.9959, | 10794,   | 163744, | 3242.6426, |
| 8.115248 |         |            | 8.109368 |         |            | 8.103487 |         |            |
| 10719,   | 164120, | 3247.2872, | 10757,   | 166584, | 3244.9339, | 10795,   | 163980, | 3242.5807, |
| 8.115094 |         |            | 8.109213 |         |            | 8.103332 |         |            |
| 10720,   | 163894, | 3247.2252, | 10758,   | 166304, | 3244.8720, | 10796,   | 164648, | 3242.5188, |
| 8.114939 |         |            | 8.109058 |         |            | 8.103177 |         |            |
| 10721,   | 163506, | 3247.1633, | 10759,   | 166150, | 3244.8101, | 10797,   | 165360, | 3242.4569, |
| 8.114784 |         |            | 8.108903 |         |            | 8.103022 |         |            |
| 10722,   | 163052, | 3247.1014, | 10760,   | 165958, | 3244.7482, | 10798,   | 165722, | 3242.3949, |
| 8.114629 |         |            | 8.108749 |         |            | 8.102868 |         |            |
| 10723,   | 162916, | 3247.0395, | 10761,   | 165604, | 3244.6862, | 10799,   | 165710, | 3242.3330, |
| 8.114475 |         |            | 8.108594 |         |            | 8.102713 |         |            |
| 10724,   | 163494, | 3246.9775, | 10762,   | 165152, | 3244.6243, | 10800,   | 165612, | 3242.2711, |
| 8.114320 |         |            | 8.108439 |         |            | 8.102558 |         |            |

|          |         |            |          |         |            |          |         |            |
|----------|---------|------------|----------|---------|------------|----------|---------|------------|
| 10801,   | 165636, | 3242.2092, | 10839,   | 163024, | 3239.8559, | 10877,   | 166830, | 3237.5027, |
| 8.102403 |         |            | 8.096523 |         |            | 8.090642 |         |            |
| 10802,   | 165628, | 3242.1472, | 10840,   | 163108, | 3239.7940, | 10878,   | 166802, | 3237.4408, |
| 8.102249 |         |            | 8.096368 |         |            | 8.090487 |         |            |
| 10803,   | 165244, | 3242.0853, | 10841,   | 162916, | 3239.7321, | 10879,   | 166340, | 3237.3789, |
| 8.102094 |         |            | 8.096213 |         |            | 8.090332 |         |            |
| 10804,   | 164452, | 3242.0234, | 10842,   | 162642, | 3239.6702, | 10880,   | 165738, | 3237.3169, |
| 8.101939 |         |            | 8.096058 |         |            | 8.090178 |         |            |
| 10805,   | 163694, | 3241.9614, | 10843,   | 162642, | 3239.6082, | 10881,   | 165330, | 3237.2550, |
| 8.101784 |         |            | 8.095904 |         |            | 8.090023 |         |            |
| 10806,   | 163550, | 3241.8995, | 10844,   | 163158, | 3239.5463, | 10882,   | 165174, | 3237.1931, |
| 8.101630 |         |            | 8.095749 |         |            | 8.089868 |         |            |
| 10807,   | 164194, | 3241.8376, | 10845,   | 164080, | 3239.4844, | 10883,   | 165006, | 3237.1311, |
| 8.101475 |         |            | 8.095594 |         |            | 8.089713 |         |            |
| 10808,   | 165160, | 3241.7757, | 10846,   | 165004, | 3239.4224, | 10884,   | 164548, | 3237.0692, |
| 8.101320 |         |            | 8.095439 |         |            | 8.089559 |         |            |
| 10809,   | 165734, | 3241.7137, | 10847,   | 165574, | 3239.3605, | 10885,   | 163810, | 3237.0073, |
| 8.101165 |         |            | 8.095285 |         |            | 8.089404 |         |            |
| 10810,   | 165492, | 3241.6518, | 10848,   | 165730, | 3239.2986, | 10886,   | 163060, | 3236.9454, |
| 8.101011 |         |            | 8.095130 |         |            | 8.089249 |         |            |
| 10811,   | 164586, | 3241.5899, | 10849,   | 165676, | 3239.2367, | 10887,   | 162578, | 3236.8834, |
| 8.100856 |         |            | 8.094975 |         |            | 8.089094 |         |            |
| 10812,   | 163506, | 3241.5280, | 10850,   | 165640, | 3239.1747, | 10888,   | 162412, | 3236.8215, |
| 8.100701 |         |            | 8.094820 |         |            | 8.088940 |         |            |
| 10813,   | 162656, | 3241.4660, | 10851,   | 165698, | 3239.1128, | 10889,   | 162472, | 3236.7596, |
| 8.100546 |         |            | 8.094666 |         |            | 8.088785 |         |            |
| 10814,   | 162150, | 3241.4041, | 10852,   | 165808, | 3239.0509, | 10890,   | 162730, | 3236.6977, |
| 8.100392 |         |            | 8.094511 |         |            | 8.088630 |         |            |
| 10815,   | 161904, | 3241.3422, | 10853,   | 165958, | 3238.9890, | 10891,   | 163270, | 3236.6357, |
| 8.100237 |         |            | 8.094356 |         |            | 8.088475 |         |            |
| 10816,   | 161822, | 3241.2803, | 10854,   | 166206, | 3238.9270, | 10892,   | 164068, | 3236.5738, |
| 8.100082 |         |            | 8.094201 |         |            | 8.088321 |         |            |
| 10817,   | 161838, | 3241.2183, | 10855,   | 166578, | 3238.8651, | 10893,   | 164836, | 3236.5119, |
| 8.099927 |         |            | 8.094047 |         |            | 8.088166 |         |            |
| 10818,   | 161876, | 3241.1564, | 10856,   | 166950, | 3238.8032, | 10894,   | 165162, | 3236.4500, |
| 8.099773 |         |            | 8.093892 |         |            | 8.088011 |         |            |
| 10819,   | 161822, | 3241.0945, | 10857,   | 167094, | 3238.7412, | 10895,   | 164906, | 3236.3880, |
| 8.099618 |         |            | 8.093737 |         |            | 8.087856 |         |            |
| 10820,   | 161704, | 3241.0325, | 10858,   | 166876, | 3238.6793, | 10896,   | 164396, | 3236.3261, |
| 8.099463 |         |            | 8.093582 |         |            | 8.087701 |         |            |
| 10821,   | 161702, | 3240.9706, | 10859,   | 166390, | 3238.6174, | 10897,   | 164154, | 3236.2642, |
| 8.099308 |         |            | 8.093428 |         |            | 8.087547 |         |            |
| 10822,   | 162054, | 3240.9087, | 10860,   | 165930, | 3238.5555, | 10898,   | 164400, | 3236.2022, |
| 8.099154 |         |            | 8.093273 |         |            | 8.087392 |         |            |
| 10823,   | 162812, | 3240.8468, | 10861,   | 165774, | 3238.4935, | 10899,   | 164844, | 3236.1403, |
| 8.098999 |         |            | 8.093118 |         |            | 8.087237 |         |            |
| 10824,   | 163728, | 3240.7848, | 10862,   | 166024, | 3238.4316, | 10900,   | 165028, | 3236.0784, |
| 8.098844 |         |            | 8.092963 |         |            | 8.087082 |         |            |
| 10825,   | 164446, | 3240.7229, | 10863,   | 166556, | 3238.3697, | 10901,   | 164858, | 3236.0165, |
| 8.098689 |         |            | 8.092808 |         |            | 8.086928 |         |            |
| 10826,   | 164750, | 3240.6610, | 10864,   | 167120, | 3238.3078, | 10902,   | 164714, | 3235.9545, |
| 8.098535 |         |            | 8.092654 |         |            | 8.086773 |         |            |
| 10827,   | 164700, | 3240.5991, | 10865,   | 167428, | 3238.2458, | 10903,   | 165060, | 3235.8926, |
| 8.098380 |         |            | 8.092499 |         |            | 8.086618 |         |            |
| 10828,   | 164492, | 3240.5371, | 10866,   | 167302, | 3238.1839, | 10904,   | 165916, | 3235.8307, |
| 8.098225 |         |            | 8.092344 |         |            | 8.086463 |         |            |
| 10829,   | 164242, | 3240.4752, | 10867,   | 166738, | 3238.1220, | 10905,   | 166804, | 3235.7688, |
| 8.098070 |         |            | 8.092189 |         |            | 8.086309 |         |            |
| 10830,   | 163928, | 3240.4133, | 10868,   | 165952, | 3238.0601, | 10906,   | 167204, | 3235.7068, |
| 8.097915 |         |            | 8.092035 |         |            | 8.086154 |         |            |
| 10831,   | 163510, | 3240.3513, | 10869,   | 165266, | 3237.9981, | 10907,   | 167032, | 3235.6449, |
| 8.097761 |         |            | 8.091880 |         |            | 8.085999 |         |            |
| 10832,   | 163030, | 3240.2894, | 10870,   | 164910, | 3237.9362, | 10908,   | 166634, | 3235.5830, |
| 8.097606 |         |            | 8.091725 |         |            | 8.085844 |         |            |
| 10833,   | 162612, | 3240.2275, | 10871,   | 164890, | 3237.8743, | 10909,   | 166344, | 3235.5210, |
| 8.097451 |         |            | 8.091570 |         |            | 8.085690 |         |            |
| 10834,   | 162342, | 3240.1656, | 10872,   | 165046, | 3237.8123, | 10910,   | 166162, | 3235.4591, |
| 8.097296 |         |            | 8.091416 |         |            | 8.085535 |         |            |
| 10835,   | 162234, | 3240.1036, | 10873,   | 165234, | 3237.7504, | 10911,   | 165848, | 3235.3972, |
| 8.097142 |         |            | 8.091261 |         |            | 8.085380 |         |            |
| 10836,   | 162264, | 3240.0417, | 10874,   | 165486, | 3237.6885, | 10912,   | 165342, | 3235.3353, |
| 8.096987 |         |            | 8.091106 |         |            | 8.085225 |         |            |
| 10837,   | 162440, | 3239.9798, | 10875,   | 165900, | 3237.6266, | 10913,   | 164874, | 3235.2733, |
| 8.096832 |         |            | 8.090951 |         |            | 8.085071 |         |            |
| 10838,   | 162738, | 3239.9179, | 10876,   | 166440, | 3237.5646, | 10914,   | 164722, | 3235.2114, |
| 8.096677 |         |            | 8.090797 |         |            | 8.084916 |         |            |

|          |         |            |          |         |            |          |         |            |
|----------|---------|------------|----------|---------|------------|----------|---------|------------|
| 10915,   | 164842, | 3235.1495, | 10953,   | 167270, | 3232.7963, | 10991,   | 169472, | 3230.4430, |
| 8.084761 |         |            | 8.078880 |         |            | 8.072999 |         |            |
| 10916,   | 164902, | 3235.0876, | 10954,   | 166914, | 3232.7343, | 10992,   | 169964, | 3230.3811, |
| 8.084606 |         |            | 8.078726 |         |            | 8.072845 |         |            |
| 10917,   | 164700, | 3235.0256, | 10955,   | 166202, | 3232.6724, | 10993,   | 170078, | 3230.3192, |
| 8.084452 |         |            | 8.078571 |         |            | 8.072690 |         |            |
| 10918,   | 164440, | 3234.9637, | 10956,   | 165344, | 3232.6105, | 10994,   | 169832, | 3230.2573, |
| 8.084297 |         |            | 8.078416 |         |            | 8.072535 |         |            |
| 10919,   | 164570, | 3234.9018, | 10957,   | 164742, | 3232.5486, | 10995,   | 169420, | 3230.1953, |
| 8.084142 |         |            | 8.078261 |         |            | 8.072380 |         |            |
| 10920,   | 165250, | 3234.8399, | 10958,   | 164656, | 3232.4866, | 10996,   | 168998, | 3230.1334, |
| 8.083987 |         |            | 8.078107 |         |            | 8.072226 |         |            |
| 10921,   | 166098, | 3234.7779, | 10959,   | 164968, | 3232.4247, | 10997,   | 168546, | 3230.0715, |
| 8.083833 |         |            | 8.077952 |         |            | 8.072071 |         |            |
| 10922,   | 166536, | 3234.7160, | 10960,   | 165284, | 3232.3628, | 10998,   | 168000, | 3230.0096, |
| 8.083678 |         |            | 8.077797 |         |            | 8.071916 |         |            |
| 10923,   | 166328, | 3234.6541, | 10961,   | 165314, | 3232.3008, | 10999,   | 167408, | 3229.9476, |
| 8.083523 |         |            | 8.077642 |         |            | 8.071761 |         |            |
| 10924,   | 165818, | 3234.5921, | 10962,   | 165070, | 3232.2389, | 11000,   | 166936, | 3229.8857, |
| 8.083368 |         |            | 8.077487 |         |            | 8.071607 |         |            |
| 10925,   | 165544, | 3234.5302, | 10963,   | 164776, | 3232.1770, | 11001,   | 166638, | 3229.8238, |
| 8.083214 |         |            | 8.077333 |         |            | 8.071452 |         |            |
| 10926,   | 165698, | 3234.4683, | 10964,   | 164618, | 3232.1151, | 11002,   | 166366, | 3229.7618, |
| 8.083059 |         |            | 8.077178 |         |            | 8.071297 |         |            |
| 10927,   | 165986, | 3234.4064, | 10965,   | 164630, | 3232.0531, | 11003,   | 165892, | 3229.6999, |
| 8.082904 |         |            | 8.077023 |         |            | 8.071142 |         |            |
| 10928,   | 166026, | 3234.3444, | 10966,   | 164842, | 3231.9912, | 11004,   | 165202, | 3229.6380, |
| 8.082749 |         |            | 8.076868 |         |            | 8.070988 |         |            |
| 10929,   | 165818, | 3234.2825, | 10967,   | 165356, | 3231.9293, | 11005,   | 164560, | 3229.5761, |
| 8.082594 |         |            | 8.076714 |         |            | 8.070833 |         |            |
| 10930,   | 165738, | 3234.2206, | 10968,   | 166258, | 3231.8674, | 11006,   | 164284, | 3229.5141, |
| 8.082440 |         |            | 8.076559 |         |            | 8.070678 |         |            |
| 10931,   | 166102, | 3234.1587, | 10969,   | 167400, | 3231.8054, | 11007,   | 164434, | 3229.4522, |
| 8.082285 |         |            | 8.076404 |         |            | 8.070523 |         |            |
| 10932,   | 166812, | 3234.0967, | 10970,   | 168388, | 3231.7435, | 11008,   | 164742, | 3229.3903, |
| 8.082130 |         |            | 8.076249 |         |            | 8.070369 |         |            |
| 10933,   | 167430, | 3234.0348, | 10971,   | 168836, | 3231.6816, | 11009,   | 164930, | 3229.3284, |
| 8.081975 |         |            | 8.076095 |         |            | 8.070214 |         |            |
| 10934,   | 167636, | 3233.9729, | 10972,   | 168716, | 3231.6197, | 11010,   | 164970, | 3229.2664, |
| 8.081821 |         |            | 8.075940 |         |            | 8.070059 |         |            |
| 10935,   | 167492, | 3233.9109, | 10973,   | 168366, | 3231.5577, | 11011,   | 165052, | 3229.2045, |
| 8.081666 |         |            | 8.075785 |         |            | 8.069904 |         |            |
| 10936,   | 167304, | 3233.8490, | 10974,   | 168192, | 3231.4958, | 11012,   | 165344, | 3229.1426, |
| 8.081511 |         |            | 8.075630 |         |            | 8.069750 |         |            |
| 10937,   | 167266, | 3233.7871, | 10975,   | 168308, | 3231.4339, | 11013,   | 165744, | 3229.0806, |
| 8.081356 |         |            | 8.075476 |         |            | 8.069595 |         |            |
| 10938,   | 167336, | 3233.7252, | 10976,   | 168520, | 3231.3719, | 11014,   | 166058, | 3229.0187, |
| 8.081202 |         |            | 8.075321 |         |            | 8.069440 |         |            |
| 10939,   | 167362, | 3233.6632, | 10977,   | 168568, | 3231.3100, | 11015,   | 166226, | 3228.9568, |
| 8.081047 |         |            | 8.075166 |         |            | 8.069285 |         |            |
| 10940,   | 167342, | 3233.6013, | 10978,   | 168406, | 3231.2481, | 11016,   | 166390, | 3228.8949, |
| 8.080892 |         |            | 8.075011 |         |            | 8.069131 |         |            |
| 10941,   | 167344, | 3233.5394, | 10979,   | 168182, | 3231.1862, | 11017,   | 166664, | 3228.8329, |
| 8.080737 |         |            | 8.074857 |         |            | 8.068976 |         |            |
| 10942,   | 167338, | 3233.4775, | 10980,   | 168020, | 3231.1242, | 11018,   | 166894, | 3228.7710, |
| 8.080583 |         |            | 8.074702 |         |            | 8.068821 |         |            |
| 10943,   | 167116, | 3233.4155, | 10981,   | 167892, | 3231.0623, | 11019,   | 166754, | 3228.7091, |
| 8.080428 |         |            | 8.074547 |         |            | 8.068666 |         |            |
| 10944,   | 166526, | 3233.3536, | 10982,   | 167724, | 3231.0004, | 11020,   | 166136, | 3228.6472, |
| 8.080273 |         |            | 8.074392 |         |            | 8.068512 |         |            |
| 10945,   | 165716, | 3233.2917, | 10983,   | 167546, | 3230.9385, | 11021,   | 165392, | 3228.5852, |
| 8.080118 |         |            | 8.074238 |         |            | 8.068357 |         |            |
| 10946,   | 165120, | 3233.2298, | 10984,   | 167496, | 3230.8765, | 11022,   | 165108, | 3228.5233, |
| 8.079964 |         |            | 8.074083 |         |            | 8.068202 |         |            |
| 10947,   | 165090, | 3233.1678, | 10985,   | 167648, | 3230.8146, | 11023,   | 165608, | 3228.4614, |
| 8.079809 |         |            | 8.073928 |         |            | 8.068047 |         |            |
| 10948,   | 165616, | 3233.1059, | 10986,   | 167898, | 3230.7527, | 11024,   | 166658, | 3228.3995, |
| 8.079654 |         |            | 8.073773 |         |            | 8.067892 |         |            |
| 10949,   | 166344, | 3233.0440, | 10987,   | 168088, | 3230.6907, | 11025,   | 167678, | 3228.3375, |
| 8.079499 |         |            | 8.073619 |         |            | 8.067738 |         |            |
| 10950,   | 166910, | 3232.9820, | 10988,   | 168200, | 3230.6288, | 11026,   | 168254, | 3228.2756, |
| 8.079345 |         |            | 8.073464 |         |            | 8.067583 |         |            |
| 10951,   | 167214, | 3232.9201, | 10989,   | 168402, | 3230.5669, | 11027,   | 168404, | 3228.2137, |
| 8.079190 |         |            | 8.073309 |         |            | 8.067428 |         |            |
| 10952,   | 167324, | 3232.8582, | 10990,   | 168854, | 3230.5050, | 11028,   | 168392, | 3228.1517, |
| 8.079035 |         |            | 8.073154 |         |            | 8.067273 |         |            |

|          |         |            |          |         |            |          |         |            |
|----------|---------|------------|----------|---------|------------|----------|---------|------------|
| 11029,   | 168366, | 3228.0898, | 11067,   | 166146, | 3225.7366, | 11105,   | 164394, | 3223.3834, |
| 8.067119 |         |            | 8.061238 |         |            | 8.055357 |         |            |
| 11030,   | 168210, | 3228.0279, | 11068,   | 166292, | 3225.6747, | 11106,   | 164942, | 3223.3214, |
| 8.066964 |         |            | 8.061083 |         |            | 8.055202 |         |            |
| 11031,   | 167748, | 3227.9660, | 11069,   | 166368, | 3225.6127, | 11107,   | 165592, | 3223.2595, |
| 8.066809 |         |            | 8.060928 |         |            | 8.055048 |         |            |
| 11032,   | 167014, | 3227.9040, | 11070,   | 166332, | 3225.5508, | 11108,   | 166064, | 3223.1976, |
| 8.066654 |         |            | 8.060774 |         |            | 8.054893 |         |            |
| 11033,   | 166222, | 3227.8421, | 11071,   | 166316, | 3225.4889, | 11109,   | 166284, | 3223.1357, |
| 8.066500 |         |            | 8.060619 |         |            | 8.054738 |         |            |
| 11034,   | 165594, | 3227.7802, | 11072,   | 166450, | 3225.4270, | 11110,   | 166336, | 3223.0737, |
| 8.066345 |         |            | 8.060464 |         |            | 8.054583 |         |            |
| 11035,   | 165164, | 3227.7183, | 11073,   | 166688, | 3225.3650, | 11111,   | 166256, | 3223.0118, |
| 8.066190 |         |            | 8.060309 |         |            | 8.054429 |         |            |
| 11036,   | 164884, | 3227.6563, | 11074,   | 166892, | 3225.3031, | 11112,   | 166002, | 3222.9499, |
| 8.066035 |         |            | 8.060155 |         |            | 8.054274 |         |            |
| 11037,   | 164764, | 3227.5944, | 11075,   | 166974, | 3225.2412, | 11113,   | 165560, | 3222.8880, |
| 8.065881 |         |            | 8.060000 |         |            | 8.054119 |         |            |
| 11038,   | 164908, | 3227.5325, | 11076,   | 166980, | 3225.1793, | 11114,   | 164994, | 3222.8260, |
| 8.065726 |         |            | 8.059845 |         |            | 8.053964 |         |            |
| 11039,   | 165314, | 3227.4706, | 11077,   | 166974, | 3225.1173, | 11115,   | 164420, | 3222.7641, |
| 8.065571 |         |            | 8.059690 |         |            | 8.053810 |         |            |
| 11040,   | 165772, | 3227.4086, | 11078,   | 166940, | 3225.0554, | 11116,   | 163916, | 3222.7022, |
| 8.065416 |         |            | 8.059536 |         |            | 8.053655 |         |            |
| 11041,   | 166020, | 3227.3467, | 11079,   | 166854, | 3224.9935, | 11117,   | 163518, | 3222.6403, |
| 8.065262 |         |            | 8.059381 |         |            | 8.053500 |         |            |
| 11042,   | 166014, | 3227.2848, | 11080,   | 166816, | 3224.9315, | 11118,   | 163294, | 3222.5783, |
| 8.065107 |         |            | 8.059226 |         |            | 8.053345 |         |            |
| 11043,   | 165970, | 3227.2228, | 11081,   | 167022, | 3224.8696, | 11119,   | 163354, | 3222.5164, |
| 8.064952 |         |            | 8.059071 |         |            | 8.053191 |         |            |
| 11044,   | 166126, | 3227.1609, | 11082,   | 167578, | 3224.8077, | 11120,   | 163782, | 3222.4545, |
| 8.064797 |         |            | 8.058917 |         |            | 8.053036 |         |            |
| 11045,   | 166406, | 3227.0990, | 11083,   | 168290, | 3224.7458, | 11121,   | 164518, | 3222.3925, |
| 8.064643 |         |            | 8.058762 |         |            | 8.052881 |         |            |
| 11046,   | 166476, | 3227.0371, | 11084,   | 168778, | 3224.6838, | 11122,   | 165352, | 3222.3306, |
| 8.064488 |         |            | 8.058607 |         |            | 8.052726 |         |            |
| 11047,   | 166096, | 3226.9751, | 11085,   | 168832, | 3224.6219, | 11123,   | 166092, | 3222.2687, |
| 8.064333 |         |            | 8.058452 |         |            | 8.052571 |         |            |
| 11048,   | 165458, | 3226.9132, | 11086,   | 168626, | 3224.5600, | 11124,   | 166654, | 3222.2068, |
| 8.064178 |         |            | 8.058298 |         |            | 8.052417 |         |            |
| 11049,   | 165052, | 3226.8513, | 11087,   | 168538, | 3224.4981, | 11125,   | 167066, | 3222.1448, |
| 8.064024 |         |            | 8.058143 |         |            | 8.052262 |         |            |
| 11050,   | 165226, | 3226.7894, | 11088,   | 168748, | 3224.4361, | 11126,   | 167324, | 3222.0829, |
| 8.063869 |         |            | 8.057988 |         |            | 8.052107 |         |            |
| 11051,   | 165846, | 3226.7274, | 11089,   | 169024, | 3224.3742, | 11127,   | 167362, | 3222.0210, |
| 8.063714 |         |            | 8.057833 |         |            | 8.051952 |         |            |
| 11052,   | 166436, | 3226.6655, | 11090,   | 168968, | 3224.3123, | 11128,   | 167154, | 3221.9591, |
| 8.063559 |         |            | 8.057678 |         |            | 8.051798 |         |            |
| 11053,   | 166602, | 3226.6036, | 11091,   | 168448, | 3224.2504, | 11129,   | 166806, | 3221.8971, |
| 8.063405 |         |            | 8.057524 |         |            | 8.051643 |         |            |
| 11054,   | 166344, | 3226.5416, | 11092,   | 167762, | 3224.1884, | 11130,   | 166514, | 3221.8352, |
| 8.063250 |         |            | 8.057369 |         |            | 8.051488 |         |            |
| 11055,   | 165918, | 3226.4797, | 11093,   | 167356, | 3224.1265, | 11131,   | 166412, | 3221.7733, |
| 8.063095 |         |            | 8.057214 |         |            | 8.051333 |         |            |
| 11056,   | 165490, | 3226.4178, | 11094,   | 167364, | 3224.0646, | 11132,   | 166452, | 3221.7113, |
| 8.062940 |         |            | 8.057059 |         |            | 8.051179 |         |            |
| 11057,   | 165038, | 3226.3559, | 11095,   | 167512, | 3224.0026, | 11133,   | 166474, | 3221.6494, |
| 8.062785 |         |            | 8.056905 |         |            | 8.051024 |         |            |
| 11058,   | 164532, | 3226.2939, | 11096,   | 167448, | 3223.9407, | 11134,   | 166410, | 3221.5875, |
| 8.062631 |         |            | 8.056750 |         |            | 8.050869 |         |            |
| 11059,   | 164152, | 3226.2320, | 11097,   | 167104, | 3223.8788, | 11135,   | 166344, | 3221.5256, |
| 8.062476 |         |            | 8.056595 |         |            | 8.050714 |         |            |
| 11060,   | 164206, | 3226.1701, | 11098,   | 166720, | 3223.8169, | 11136,   | 166372, | 3221.4636, |
| 8.062321 |         |            | 8.056440 |         |            | 8.050560 |         |            |
| 11061,   | 164812, | 3226.1082, | 11099,   | 166530, | 3223.7549, | 11137,   | 166470, | 3221.4017, |
| 8.062166 |         |            | 8.056286 |         |            | 8.050405 |         |            |
| 11062,   | 165686, | 3226.0462, | 11100,   | 166452, | 3223.6930, | 11138,   | 166510, | 3221.3398, |
| 8.062012 |         |            | 8.056131 |         |            | 8.050250 |         |            |
| 11063,   | 166342, | 3225.9843, | 11101,   | 166178, | 3223.6311, | 11139,   | 166456, | 3221.2779, |
| 8.061857 |         |            | 8.055976 |         |            | 8.050095 |         |            |
| 11064,   | 166512, | 3225.9224, | 11102,   | 165548, | 3223.5692, | 11140,   | 166532, | 3221.2159, |
| 8.061702 |         |            | 8.055821 |         |            | 8.049941 |         |            |
| 11065,   | 166320, | 3225.8605, | 11103,   | 164776, | 3223.5072, | 11141,   | 167032, | 3221.1540, |
| 8.061547 |         |            | 8.055667 |         |            | 8.049786 |         |            |
| 11066,   | 166130, | 3225.7985, | 11104,   | 164300, | 3223.4453, | 11142,   | 168036, | 3221.0921, |
| 8.061393 |         |            | 8.055512 |         |            | 8.049631 |         |            |

|          |         |            |          |         |            |          |         |            |
|----------|---------|------------|----------|---------|------------|----------|---------|------------|
| 11143,   | 169236, | 3221.0302, | 11181,   | 167380, | 3218.6769, | 11219,   | 166320, | 3216.3237, |
| 8.049476 |         |            | 8.043596 |         |            | 8.037715 |         |            |
| 11144,   | 170148, | 3220.9682, | 11182,   | 167170, | 3218.6150, | 11220,   | 166642, | 3216.2618, |
| 8.049322 |         |            | 8.043441 |         |            | 8.037560 |         |            |
| 11145,   | 170506, | 3220.9063, | 11183,   | 166856, | 3218.5531, | 11221,   | 166868, | 3216.1999, |
| 8.049167 |         |            | 8.043286 |         |            | 8.037405 |         |            |
| 11146,   | 170418, | 3220.8444, | 11184,   | 166644, | 3218.4911, | 11222,   | 167220, | 3216.1379, |
| 8.049012 |         |            | 8.043131 |         |            | 8.037250 |         |            |
| 11147,   | 170212, | 3220.7824, | 11185,   | 166582, | 3218.4292, | 11223,   | 167736, | 3216.0760, |
| 8.048857 |         |            | 8.042977 |         |            | 8.037096 |         |            |
| 11148,   | 170076, | 3220.7205, | 11186,   | 166552, | 3218.3673, | 11224,   | 168174, | 3216.0141, |
| 8.048703 |         |            | 8.042822 |         |            | 8.036941 |         |            |
| 11149,   | 169950, | 3220.6586, | 11187,   | 166424, | 3218.3054, | 11225,   | 168248, | 3215.9521, |
| 8.048548 |         |            | 8.042667 |         |            | 8.036786 |         |            |
| 11150,   | 169664, | 3220.5967, | 11188,   | 166254, | 3218.2434, | 11226,   | 167946, | 3215.8902, |
| 8.048393 |         |            | 8.042512 |         |            | 8.036631 |         |            |
| 11151,   | 169212, | 3220.5347, | 11189,   | 166298, | 3218.1815, | 11227,   | 167576, | 3215.8283, |
| 8.048238 |         |            | 8.042357 |         |            | 8.036477 |         |            |
| 11152,   | 168752, | 3220.4728, | 11190,   | 166752, | 3218.1196, | 11228,   | 167460, | 3215.7664, |
| 8.048084 |         |            | 8.042203 |         |            | 8.036322 |         |            |
| 11153,   | 168426, | 3220.4109, | 11191,   | 167522, | 3218.0577, | 11229,   | 167626, | 3215.7044, |
| 8.047929 |         |            | 8.042048 |         |            | 8.036167 |         |            |
| 11154,   | 168170, | 3220.3490, | 11192,   | 168230, | 3217.9957, | 11230,   | 167818, | 3215.6425, |
| 8.047774 |         |            | 8.041893 |         |            | 8.036012 |         |            |
| 11155,   | 167830, | 3220.2870, | 11193,   | 168480, | 3217.9338, | 11231,   | 167820, | 3215.5806, |
| 8.047619 |         |            | 8.041738 |         |            | 8.035858 |         |            |
| 11156,   | 167404, | 3220.2251, | 11194,   | 168150, | 3217.8719, | 11232,   | 167684, | 3215.5187, |
| 8.047464 |         |            | 8.041584 |         |            | 8.035703 |         |            |
| 11157,   | 167106, | 3220.1632, | 11195,   | 167420, | 3217.8100, | 11233,   | 167664, | 3215.4567, |
| 8.047310 |         |            | 8.041429 |         |            | 8.035548 |         |            |
| 11158,   | 167210, | 3220.1012, | 11196,   | 166556, | 3217.7480, | 11234,   | 167870, | 3215.3948, |
| 8.047155 |         |            | 8.041274 |         |            | 8.035393 |         |            |
| 11159,   | 167722, | 3220.0393, | 11197,   | 165746, | 3217.6861, | 11235,   | 168144, | 3215.3329, |
| 8.047000 |         |            | 8.041119 |         |            | 8.035239 |         |            |
| 11160,   | 168294, | 3219.9774, | 11198,   | 165040, | 3217.6242, | 11236,   | 168242, | 3215.2710, |
| 8.046845 |         |            | 8.040965 |         |            | 8.035084 |         |            |
| 11161,   | 168500, | 3219.9155, | 11199,   | 164460, | 3217.5622, | 11237,   | 168152, | 3215.2090, |
| 8.046691 |         |            | 8.040810 |         |            | 8.034929 |         |            |
| 11162,   | 168148, | 3219.8535, | 11200,   | 164070, | 3217.5003, | 11238,   | 168112, | 3215.1471, |
| 8.046536 |         |            | 8.040655 |         |            | 8.034774 |         |            |
| 11163,   | 167422, | 3219.7916, | 11201,   | 163936, | 3217.4384, | 11239,   | 168326, | 3215.0852, |
| 8.046381 |         |            | 8.040500 |         |            | 8.034620 |         |            |
| 11164,   | 166696, | 3219.7297, | 11202,   | 164038, | 3217.3765, | 11240,   | 168664, | 3215.0232, |
| 8.046226 |         |            | 8.040346 |         |            | 8.034465 |         |            |
| 11165,   | 166244, | 3219.6678, | 11203,   | 164296, | 3217.3145, | 11241,   | 168718, | 3214.9613, |
| 8.046072 |         |            | 8.040191 |         |            | 8.034310 |         |            |
| 11166,   | 166118, | 3219.6058, | 11204,   | 164640, | 3217.2526, | 11242,   | 168198, | 3214.8994, |
| 8.045917 |         |            | 8.040036 |         |            | 8.034155 |         |            |
| 11167,   | 166208, | 3219.5439, | 11205,   | 165006, | 3217.1907, | 11243,   | 167286, | 3214.8375, |
| 8.045762 |         |            | 8.039881 |         |            | 8.034001 |         |            |
| 11168,   | 166418, | 3219.4820, | 11206,   | 165284, | 3217.1288, | 11244,   | 166502, | 3214.7755, |
| 8.045607 |         |            | 8.039727 |         |            | 8.033846 |         |            |
| 11169,   | 166692, | 3219.4201, | 11207,   | 165284, | 3217.0668, | 11245,   | 166298, | 3214.7136, |
| 8.045453 |         |            | 8.039572 |         |            | 8.033691 |         |            |
| 11170,   | 166994, | 3219.3581, | 11208,   | 164856, | 3217.0049, | 11246,   | 166692, | 3214.6517, |
| 8.045298 |         |            | 8.039417 |         |            | 8.033536 |         |            |
| 11171,   | 167262, | 3219.2962, | 11209,   | 164080, | 3216.9430, | 11247,   | 167310, | 3214.5898, |
| 8.045143 |         |            | 8.039262 |         |            | 8.033382 |         |            |
| 11172,   | 167428, | 3219.2343, | 11210,   | 163308, | 3216.8810, | 11248,   | 167762, | 3214.5278, |
| 8.044988 |         |            | 8.039108 |         |            | 8.033227 |         |            |
| 11173,   | 167440, | 3219.1723, | 11211,   | 162928, | 3216.8191, | 11249,   | 167900, | 3214.4659, |
| 8.044834 |         |            | 8.038953 |         |            | 8.033072 |         |            |
| 11174,   | 167310, | 3219.1104, | 11212,   | 163086, | 3216.7572, | 11250,   | 167804, | 3214.4040, |
| 8.044679 |         |            | 8.038798 |         |            | 8.032917 |         |            |
| 11175,   | 167090, | 3219.0485, | 11213,   | 163564, | 3216.6953, | 11251,   | 167576, | 3214.3420, |
| 8.044524 |         |            | 8.038643 |         |            | 8.032763 |         |            |
| 11176,   | 166880, | 3218.9866, | 11214,   | 164038, | 3216.6333, | 11252,   | 167222, | 3214.2801, |
| 8.044369 |         |            | 8.038489 |         |            | 8.032608 |         |            |
| 11177,   | 166782, | 3218.9246, | 11215,   | 164372, | 3216.5714, | 11253,   | 166690, | 3214.2182, |
| 8.044215 |         |            | 8.038334 |         |            | 8.032453 |         |            |
| 11178,   | 166878, | 3218.8627, | 11216,   | 164696, | 3216.5095, | 11254,   | 166014, | 3214.1563, |
| 8.044060 |         |            | 8.038179 |         |            | 8.032298 |         |            |
| 11179,   | 167122, | 3218.8008, | 11217,   | 165178, | 3216.4476, | 11255,   | 165324, | 3214.0943, |
| 8.043905 |         |            | 8.038024 |         |            | 8.032143 |         |            |
| 11180,   | 167348, | 3218.7389, | 11218,   | 165786, | 3216.3856, | 11256,   | 164778, | 3214.0324, |
| 8.043750 |         |            | 8.037870 |         |            | 8.031989 |         |            |

|          |         |            |          |         |            |          |         |            |
|----------|---------|------------|----------|---------|------------|----------|---------|------------|
| 11257,   | 164460, | 3213.9705, | 11295,   | 165292, | 3211.6173, | 11333,   | 165174, | 3209.2640, |
| 8.031834 |         |            | 8.025953 |         |            | 8.020072 |         |            |
| 11258,   | 164370, | 3213.9086, | 11296,   | 164952, | 3211.5553, | 11334,   | 164980, | 3209.2021, |
| 8.031679 |         |            | 8.025798 |         |            | 8.019918 |         |            |
| 11259,   | 164460, | 3213.8466, | 11297,   | 164604, | 3211.4934, | 11335,   | 164988, | 3209.1402, |
| 8.031524 |         |            | 8.025644 |         |            | 8.019763 |         |            |
| 11260,   | 164648, | 3213.7847, | 11298,   | 164540, | 3211.4315, | 11336,   | 165056, | 3209.0783, |
| 8.031370 |         |            | 8.025489 |         |            | 8.019608 |         |            |
| 11261,   | 164846, | 3213.7228, | 11299,   | 164844, | 3211.3696, | 11337,   | 165100, | 3209.0163, |
| 8.031215 |         |            | 8.025334 |         |            | 8.019453 |         |            |
| 11262,   | 165010, | 3213.6609, | 11300,   | 165226, | 3211.3076, | 11338,   | 165104, | 3208.9544, |
| 8.031060 |         |            | 8.025179 |         |            | 8.019299 |         |            |
| 11263,   | 165230, | 3213.5989, | 11301,   | 165286, | 3211.2457, | 11339,   | 165194, | 3208.8925, |
| 8.030905 |         |            | 8.025025 |         |            | 8.019144 |         |            |
| 11264,   | 165696, | 3213.5370, | 11302,   | 164902, | 3211.1838, | 11340,   | 165570, | 3208.8306, |
| 8.030751 |         |            | 8.024870 |         |            | 8.018989 |         |            |
| 11265,   | 166502, | 3213.4751, | 11303,   | 164360, | 3211.1218, | 11341,   | 166360, | 3208.7686, |
| 8.030596 |         |            | 8.024715 |         |            | 8.018834 |         |            |
| 11266,   | 167480, | 3213.4131, | 11304,   | 164106, | 3211.0599, | 11342,   | 167442, | 3208.7067, |
| 8.030441 |         |            | 8.024560 |         |            | 8.018680 |         |            |
| 11267,   | 168234, | 3213.3512, | 11305,   | 164344, | 3210.9980, | 11343,   | 168412, | 3208.6448, |
| 8.030286 |         |            | 8.024406 |         |            | 8.018525 |         |            |
| 11268,   | 168468, | 3213.2893, | 11306,   | 164952, | 3210.9361, | 11344,   | 168868, | 3208.5828, |
| 8.030132 |         |            | 8.024251 |         |            | 8.018370 |         |            |
| 11269,   | 168276, | 3213.2274, | 11307,   | 165728, | 3210.8741, | 11345,   | 168700, | 3208.5209, |
| 8.029977 |         |            | 8.024096 |         |            | 8.018215 |         |            |
| 11270,   | 168096, | 3213.1654, | 11308,   | 166576, | 3210.8122, | 11346,   | 168202, | 3208.4590, |
| 8.029822 |         |            | 8.023941 |         |            | 8.018061 |         |            |
| 11271,   | 168308, | 3213.1035, | 11309,   | 167500, | 3210.7503, | 11347,   | 167854, | 3208.3971, |
| 8.029667 |         |            | 8.023787 |         |            | 8.017906 |         |            |
| 11272,   | 168872, | 3213.0416, | 11310,   | 168370, | 3210.6884, | 11348,   | 167980, | 3208.3351, |
| 8.029513 |         |            | 8.023632 |         |            | 8.017751 |         |            |
| 11273,   | 169354, | 3212.9797, | 11311,   | 168910, | 3210.6264, | 11349,   | 168590, | 3208.2732, |
| 8.029358 |         |            | 8.023477 |         |            | 8.017596 |         |            |
| 11274,   | 169382, | 3212.9177, | 11312,   | 168936, | 3210.5645, | 11350,   | 169452, | 3208.2113, |
| 8.029203 |         |            | 8.023322 |         |            | 8.017441 |         |            |
| 11275,   | 168956, | 3212.8558, | 11313,   | 168610, | 3210.5026, | 11351,   | 170298, | 3208.1494, |
| 8.029048 |         |            | 8.023168 |         |            | 8.017287 |         |            |
| 11276,   | 168462, | 3212.7939, | 11314,   | 168374, | 3210.4407, | 11352,   | 170916, | 3208.0874, |
| 8.028894 |         |            | 8.023013 |         |            | 8.017132 |         |            |
| 11277,   | 168244, | 3212.7319, | 11315,   | 168558, | 3210.3787, | 11353,   | 171126, | 3208.0255, |
| 8.028739 |         |            | 8.022858 |         |            | 8.016977 |         |            |
| 11278,   | 168358, | 3212.6700, | 11316,   | 169066, | 3210.3168, | 11354,   | 170780, | 3207.9636, |
| 8.028584 |         |            | 8.022703 |         |            | 8.016822 |         |            |
| 11279,   | 168600, | 3212.6081, | 11317,   | 169458, | 3210.2549, | 11355,   | 169874, | 3207.9016, |
| 8.028429 |         |            | 8.022548 |         |            | 8.016668 |         |            |
| 11280,   | 168822, | 3212.5462, | 11318,   | 169416, | 3210.1929, | 11356,   | 168664, | 3207.8397, |
| 8.028275 |         |            | 8.022394 |         |            | 8.016513 |         |            |
| 11281,   | 169064, | 3212.4842, | 11319,   | 169052, | 3210.1310, | 11357,   | 167584, | 3207.7778, |
| 8.028120 |         |            | 8.022239 |         |            | 8.016358 |         |            |
| 11282,   | 169390, | 3212.4223, | 11320,   | 168778, | 3210.0691, | 11358,   | 167008, | 3207.7159, |
| 8.027965 |         |            | 8.022084 |         |            | 8.016203 |         |            |
| 11283,   | 169674, | 3212.3604, | 11321,   | 168872, | 3210.0072, | 11359,   | 167042, | 3207.6539, |
| 8.027810 |         |            | 8.021929 |         |            | 8.016049 |         |            |
| 11284,   | 169628, | 3212.2985, | 11322,   | 169226, | 3209.9452, | 11360,   | 167506, | 3207.5920, |
| 8.027655 |         |            | 8.021775 |         |            | 8.015894 |         |            |
| 11285,   | 169114, | 3212.2365, | 11323,   | 169488, | 3209.8833, | 11361,   | 168116, | 3207.5301, |
| 8.027501 |         |            | 8.021620 |         |            | 8.015739 |         |            |
| 11286,   | 168338, | 3212.1746, | 11324,   | 169446, | 3209.8214, | 11362,   | 168654, | 3207.4682, |
| 8.027346 |         |            | 8.021465 |         |            | 8.015584 |         |            |
| 11287,   | 167710, | 3212.1127, | 11325,   | 169214, | 3209.7595, | 11363,   | 168976, | 3207.4062, |
| 8.027191 |         |            | 8.021310 |         |            | 8.015430 |         |            |
| 11288,   | 167446, | 3212.0508, | 11326,   | 169036, | 3209.6975, | 11364,   | 169012, | 3207.3443, |
| 8.027036 |         |            | 8.021156 |         |            | 8.015275 |         |            |
| 11289,   | 167384, | 3211.9888, | 11327,   | 168980, | 3209.6356, | 11365,   | 168764, | 3207.2824, |
| 8.026882 |         |            | 8.021001 |         |            | 8.015120 |         |            |
| 11290,   | 167182, | 3211.9269, | 11328,   | 168852, | 3209.5737, | 11366,   | 168408, | 3207.2205, |
| 8.026727 |         |            | 8.020846 |         |            | 8.014965 |         |            |
| 11291,   | 166690, | 3211.8650, | 11329,   | 168388, | 3209.5117, | 11367,   | 168222, | 3207.1585, |
| 8.026572 |         |            | 8.020691 |         |            | 8.014811 |         |            |
| 11292,   | 166104, | 3211.8030, | 11330,   | 167542, | 3209.4498, | 11368,   | 168374, | 3207.0966, |
| 8.026417 |         |            | 8.020537 |         |            | 8.014656 |         |            |
| 11293,   | 165690, | 3211.7411, | 11331,   | 166540, | 3209.3879, | 11369,   | 168732, | 3207.0347, |
| 8.026263 |         |            | 8.020382 |         |            | 8.014501 |         |            |
| 11294,   | 165488, | 3211.6792, | 11332,   | 165692, | 3209.3260, | 11370,   | 168904, | 3206.9727, |
| 8.026108 |         |            | 8.020227 |         |            | 8.014346 |         |            |

|          |         |            |          |         |            |          |         |            |
|----------|---------|------------|----------|---------|------------|----------|---------|------------|
| 11371,   | 168586, | 3206.9108, | 11409,   | 167292, | 3204.5576, | 11447,   | 166322, | 3202.2044, |
| 8.014192 |         |            | 8.008311 |         |            | 8.002430 |         |            |
| 11372,   | 167860, | 3206.8489, | 11410,   | 167662, | 3204.4957, | 11448,   | 166494, | 3202.1424, |
| 8.014037 |         |            | 8.008156 |         |            | 8.002275 |         |            |
| 11373,   | 167124, | 3206.7870, | 11411,   | 167820, | 3204.4337, | 11449,   | 166798, | 3202.0805, |
| 8.013882 |         |            | 8.008001 |         |            | 8.002120 |         |            |
| 11374,   | 166708, | 3206.7250, | 11412,   | 168116, | 3204.3718, | 11450,   | 167542, | 3202.0186, |
| 8.013727 |         |            | 8.007847 |         |            | 8.001966 |         |            |
| 11375,   | 166566, | 3206.6631, | 11413,   | 168654, | 3204.3099, | 11451,   | 168610, | 3201.9567, |
| 8.013573 |         |            | 8.007692 |         |            | 8.001811 |         |            |
| 11376,   | 166402, | 3206.6012, | 11414,   | 169244, | 3204.2480, | 11452,   | 169500, | 3201.8947, |
| 8.013418 |         |            | 8.007537 |         |            | 8.001656 |         |            |
| 11377,   | 166034, | 3206.5393, | 11415,   | 169652, | 3204.1860, | 11453,   | 169756, | 3201.8328, |
| 8.013263 |         |            | 8.007382 |         |            | 8.001501 |         |            |
| 11378,   | 165666, | 3206.4773, | 11416,   | 169870, | 3204.1241, | 11454,   | 169382, | 3201.7709, |
| 8.013108 |         |            | 8.007227 |         |            | 8.001347 |         |            |
| 11379,   | 165668, | 3206.4154, | 11417,   | 170082, | 3204.0622, | 11455,   | 168762, | 3201.7090, |
| 8.012954 |         |            | 8.007073 |         |            | 8.001192 |         |            |
| 11380,   | 166188, | 3206.3535, | 11418,   | 170408, | 3204.0003, | 11456,   | 168234, | 3201.6470, |
| 8.012799 |         |            | 8.006918 |         |            | 8.001037 |         |            |
| 11381,   | 166946, | 3206.2915, | 11419,   | 170720, | 3203.9383, | 11457,   | 167832, | 3201.5851, |
| 8.012644 |         |            | 8.006763 |         |            | 8.000882 |         |            |
| 11382,   | 167530, | 3206.2296, | 11420,   | 170750, | 3203.8764, | 11458,   | 167420, | 3201.5232, |
| 8.012489 |         |            | 8.006608 |         |            | 8.000728 |         |            |
| 11383,   | 167826, | 3206.1677, | 11421,   | 170366, | 3203.8145, | 11459,   | 167054, | 3201.4613, |
| 8.012334 |         |            | 8.006454 |         |            | 8.000573 |         |            |
| 11384,   | 168076, | 3206.1058, | 11422,   | 169694, | 3203.7525, | 11460,   | 167038, | 3201.3993, |
| 8.012180 |         |            | 8.006299 |         |            | 8.000418 |         |            |
| 11385,   | 168574, | 3206.0438, | 11423,   | 168966, | 3203.6906, | 11461,   | 167586, | 3201.3374, |
| 8.012025 |         |            | 8.006144 |         |            | 8.000263 |         |            |
| 11386,   | 169266, | 3205.9819, | 11424,   | 168336, | 3203.6287, | 11462,   | 168478, | 3201.2755, |
| 8.011870 |         |            | 8.005989 |         |            | 8.000109 |         |            |
| 11387,   | 169744, | 3205.9200, | 11425,   | 167814, | 3203.5668, | 11463,   | 169152, | 3201.2135, |
| 8.011715 |         |            | 8.005835 |         |            | 7.999954 |         |            |
| 11388,   | 169676, | 3205.8581, | 11426,   | 167372, | 3203.5048, | 11464,   | 169204, | 3201.1516, |
| 8.011561 |         |            | 8.005680 |         |            | 7.999799 |         |            |
| 11389,   | 169176, | 3205.7961, | 11427,   | 167012, | 3203.4429, | 11465,   | 168760, | 3201.0897, |
| 8.011406 |         |            | 8.005525 |         |            | 7.999644 |         |            |
| 11390,   | 168726, | 3205.7342, | 11428,   | 166712, | 3203.3810, | 11466,   | 168358, | 3201.0278, |
| 8.011251 |         |            | 8.005370 |         |            | 7.999490 |         |            |
| 11391,   | 168722, | 3205.6723, | 11429,   | 166334, | 3203.3191, | 11467,   | 168402, | 3200.9658, |
| 8.011096 |         |            | 8.005216 |         |            | 7.999335 |         |            |
| 11392,   | 169132, | 3205.6104, | 11430,   | 165730, | 3203.2571, | 11468,   | 168818, | 3200.9039, |
| 8.010942 |         |            | 8.005061 |         |            | 7.999180 |         |            |
| 11393,   | 169568, | 3205.5484, | 11431,   | 164988, | 3203.1952, | 11469,   | 169190, | 3200.8420, |
| 8.010787 |         |            | 8.004906 |         |            | 7.999025 |         |            |
| 11394,   | 169664, | 3205.4865, | 11432,   | 164488, | 3203.1333, | 11470,   | 169248, | 3200.7801, |
| 8.010632 |         |            | 8.004751 |         |            | 7.998871 |         |            |
| 11395,   | 169366, | 3205.4246, | 11433,   | 164652, | 3203.0713, | 11471,   | 169132, | 3200.7181, |
| 8.010477 |         |            | 8.004597 |         |            | 7.998716 |         |            |
| 11396,   | 168862, | 3205.3626, | 11434,   | 165564, | 3203.0094, | 11472,   | 169224, | 3200.6562, |
| 8.010323 |         |            | 8.004442 |         |            | 7.998561 |         |            |
| 11397,   | 168328, | 3205.3007, | 11435,   | 166830, | 3202.9475, | 11473,   | 169692, | 3200.5943, |
| 8.010168 |         |            | 8.004287 |         |            | 7.998406 |         |            |
| 11398,   | 167784, | 3205.2388, | 11436,   | 167876, | 3202.8856, | 11474,   | 170324, | 3200.5323, |
| 8.010013 |         |            | 8.004132 |         |            | 7.998252 |         |            |
| 11399,   | 167172, | 3205.1769, | 11437,   | 168392, | 3202.8236, | 11475,   | 170726, | 3200.4704, |
| 8.009858 |         |            | 8.003978 |         |            | 7.998097 |         |            |
| 11400,   | 166490, | 3205.1149, | 11438,   | 168468, | 3202.7617, | 11476,   | 170690, | 3200.4085, |
| 8.009704 |         |            | 8.003823 |         |            | 7.997942 |         |            |
| 11401,   | 165802, | 3205.0530, | 11439,   | 168334, | 3202.6998, | 11477,   | 170316, | 3200.3466, |
| 8.009549 |         |            | 8.003668 |         |            | 7.997787 |         |            |
| 11402,   | 165140, | 3204.9911, | 11440,   | 168052, | 3202.6379, | 11478,   | 169844, | 3200.2846, |
| 8.009394 |         |            | 8.003513 |         |            | 7.997633 |         |            |
| 11403,   | 164518, | 3204.9292, | 11441,   | 167490, | 3202.5759, | 11479,   | 169448, | 3200.2227, |
| 8.009239 |         |            | 8.003359 |         |            | 7.997478 |         |            |
| 11404,   | 164034, | 3204.8672, | 11442,   | 166638, | 3202.5140, | 11480,   | 169128, | 3200.1608, |
| 8.009085 |         |            | 8.003204 |         |            | 7.997323 |         |            |
| 11405,   | 163920, | 3204.8053, | 11443,   | 165794, | 3202.4521, | 11481,   | 168830, | 3200.0989, |
| 8.008930 |         |            | 8.003049 |         |            | 7.997168 |         |            |
| 11406,   | 164382, | 3204.7434, | 11444,   | 165376, | 3202.3902, | 11482,   | 168496, | 3200.0369, |
| 8.008775 |         |            | 8.002894 |         |            | 7.997013 |         |            |
| 11407,   | 165362, | 3204.6814, | 11445,   | 165528, | 3202.3282, | 11483,   | 168094, | 3199.9750, |
| 8.008620 |         |            | 8.002740 |         |            | 7.996859 |         |            |
| 11408,   | 166480, | 3204.6195, | 11446,   | 165974, | 3202.2663, | 11484,   | 167602, | 3199.9131, |
| 8.008466 |         |            | 8.002585 |         |            | 7.996704 |         |            |



|          |         |            |          |         |            |          |         |            |
|----------|---------|------------|----------|---------|------------|----------|---------|------------|
| 11485,   | 167096, | 3199.8512, | 11523,   | 168548, | 3197.4979, | 11561,   | 171270, | 3195.1447, |
| 7.996549 |         |            | 7.990668 |         |            | 7.984788 |         |            |
| 11486,   | 166770, | 3199.7892, | 11524,   | 167364, | 3197.4360, | 11562,   | 171402, | 3195.0828, |
| 7.996394 |         |            | 7.990514 |         |            | 7.984633 |         |            |
| 11487,   | 166806, | 3199.7273, | 11525,   | 166348, | 3197.3741, | 11563,   | 171112, | 3195.0209, |
| 7.996240 |         |            | 7.990359 |         |            | 7.984478 |         |            |
| 11488,   | 167194, | 3199.6654, | 11526,   | 165886, | 3197.3121, | 11564,   | 170714, | 3194.9589, |
| 7.996085 |         |            | 7.990204 |         |            | 7.984323 |         |            |
| 11489,   | 167612, | 3199.6034, | 11527,   | 165992, | 3197.2502, | 11565,   | 170352, | 3194.8970, |
| 7.995930 |         |            | 7.990049 |         |            | 7.984169 |         |            |
| 11490,   | 167668, | 3199.5415, | 11528,   | 166374, | 3197.1883, | 11566,   | 170032, | 3194.8351, |
| 7.995775 |         |            | 7.989895 |         |            | 7.984014 |         |            |
| 11491,   | 167254, | 3199.4796, | 11529,   | 166760, | 3197.1264, | 11567,   | 169786, | 3194.7731, |
| 7.995621 |         |            | 7.989740 |         |            | 7.983859 |         |            |
| 11492,   | 166684, | 3199.4177, | 11530,   | 167086, | 3197.0644, | 11568,   | 169796, | 3194.7112, |
| 7.995466 |         |            | 7.989585 |         |            | 7.983704 |         |            |
| 11493,   | 166450, | 3199.3557, | 11531,   | 167416, | 3197.0025, | 11569,   | 170204, | 3194.6493, |
| 7.995311 |         |            | 7.989430 |         |            | 7.983550 |         |            |
| 11494,   | 166762, | 3199.2938, | 11532,   | 167774, | 3196.9406, | 11570,   | 170896, | 3194.5874, |
| 7.995156 |         |            | 7.989276 |         |            | 7.983395 |         |            |
| 11495,   | 167376, | 3199.2319, | 11533,   | 168086, | 3196.8787, | 11571,   | 171484, | 3194.5254, |
| 7.995002 |         |            | 7.989121 |         |            | 7.983240 |         |            |
| 11496,   | 167852, | 3199.1700, | 11534,   | 168314, | 3196.8167, | 11572,   | 171606, | 3194.4635, |
| 7.994847 |         |            | 7.988966 |         |            | 7.983085 |         |            |
| 11497,   | 167946, | 3199.1080, | 11535,   | 168526, | 3196.7548, | 11573,   | 171258, | 3194.4016, |
| 7.994692 |         |            | 7.988811 |         |            | 7.982931 |         |            |
| 11498,   | 167814, | 3199.0461, | 11536,   | 168786, | 3196.6929, | 11574,   | 170722, | 3194.3397, |
| 7.994537 |         |            | 7.988657 |         |            | 7.982776 |         |            |
| 11499,   | 167770, | 3198.9842, | 11537,   | 169000, | 3196.6310, | 11575,   | 170300, | 3194.2777, |
| 7.994383 |         |            | 7.988502 |         |            | 7.982621 |         |            |
| 11500,   | 167912, | 3198.9222, | 11538,   | 168982, | 3196.5690, | 11576,   | 170024, | 3194.2158, |
| 7.994228 |         |            | 7.988347 |         |            | 7.982466 |         |            |
| 11501,   | 168052, | 3198.8603, | 11539,   | 168672, | 3196.5071, | 11577,   | 169740, | 3194.1539, |
| 7.994073 |         |            | 7.988192 |         |            | 7.982311 |         |            |
| 11502,   | 167934, | 3198.7984, | 11540,   | 168308, | 3196.4452, | 11578,   | 169342, | 3194.0919, |
| 7.993918 |         |            | 7.988038 |         |            | 7.982157 |         |            |
| 11503,   | 167536, | 3198.7365, | 11541,   | 168278, | 3196.3832, | 11579,   | 168974, | 3194.0300, |
| 7.993764 |         |            | 7.987883 |         |            | 7.982002 |         |            |
| 11504,   | 167112, | 3198.6745, | 11542,   | 168750, | 3196.3213, | 11580,   | 168882, | 3193.9681, |
| 7.993609 |         |            | 7.987728 |         |            | 7.981847 |         |            |
| 11505,   | 166948, | 3198.6126, | 11543,   | 169460, | 3196.2594, | 11581,   | 169164, | 3193.9062, |
| 7.993454 |         |            | 7.987573 |         |            | 7.981692 |         |            |
| 11506,   | 167112, | 3198.5507, | 11544,   | 169964, | 3196.1975, | 11582,   | 169652, | 3193.8442, |
| 7.993299 |         |            | 7.987419 |         |            | 7.981538 |         |            |
| 11507,   | 167458, | 3198.4888, | 11545,   | 170068, | 3196.1355, | 11583,   | 170088, | 3193.7823, |
| 7.993145 |         |            | 7.987264 |         |            | 7.981383 |         |            |
| 11508,   | 167804, | 3198.4268, | 11546,   | 170024, | 3196.0736, | 11584,   | 170300, | 3193.7204, |
| 7.992990 |         |            | 7.987109 |         |            | 7.981228 |         |            |
| 11509,   | 168106, | 3198.3649, | 11547,   | 170238, | 3196.0117, | 11585,   | 170298, | 3193.6585, |
| 7.992835 |         |            | 7.986954 |         |            | 7.981073 |         |            |
| 11510,   | 168458, | 3198.3030, | 11548,   | 170804, | 3195.9498, | 11586,   | 170128, | 3193.5965, |
| 7.992680 |         |            | 7.986799 |         |            | 7.980919 |         |            |
| 11511,   | 168974, | 3198.2411, | 11549,   | 171352, | 3195.8878, | 11587,   | 169800, | 3193.5346, |
| 7.992526 |         |            | 7.986645 |         |            | 7.980764 |         |            |
| 11512,   | 169658, | 3198.1791, | 11550,   | 171400, | 3195.8259, | 11588,   | 169310, | 3193.4727, |
| 7.992371 |         |            | 7.986490 |         |            | 7.980609 |         |            |
| 11513,   | 170404, | 3198.1172, | 11551,   | 170810, | 3195.7640, | 11589,   | 168748, | 3193.4108, |
| 7.992216 |         |            | 7.986335 |         |            | 7.980454 |         |            |
| 11514,   | 171012, | 3198.0553, | 11552,   | 169872, | 3195.7020, | 11590,   | 168328, | 3193.3488, |
| 7.992061 |         |            | 7.986180 |         |            | 7.980300 |         |            |
| 11515,   | 171278, | 3197.9933, | 11553,   | 169022, | 3195.6401, | 11591,   | 168296, | 3193.2869, |
| 7.991906 |         |            | 7.986026 |         |            | 7.980145 |         |            |
| 11516,   | 171088, | 3197.9314, | 11554,   | 168446, | 3195.5782, | 11592,   | 168758, | 3193.2250, |
| 7.991752 |         |            | 7.985871 |         |            | 7.979990 |         |            |
| 11517,   | 170530, | 3197.8695, | 11555,   | 168062, | 3195.5163, | 11593,   | 169660, | 3193.1630, |
| 7.991597 |         |            | 7.985716 |         |            | 7.979835 |         |            |
| 11518,   | 169902, | 3197.8076, | 11556,   | 167808, | 3195.4543, | 11594,   | 170772, | 3193.1011, |
| 7.991442 |         |            | 7.985561 |         |            | 7.979681 |         |            |
| 11519,   | 169540, | 3197.7456, | 11557,   | 167842, | 3195.3924, | 11595,   | 171762, | 3193.0392, |
| 7.991287 |         |            | 7.985407 |         |            | 7.979526 |         |            |
| 11520,   | 169548, | 3197.6837, | 11558,   | 168392, | 3195.3305, | 11596,   | 172292, | 3192.9773, |
| 7.991133 |         |            | 7.985252 |         |            | 7.979371 |         |            |
| 11521,   | 169644, | 3197.6218, | 11559,   | 169424, | 3195.2686, | 11597,   | 172166, | 3192.9153, |
| 7.990978 |         |            | 7.985097 |         |            | 7.979216 |         |            |
| 11522,   | 169384, | 3197.5599, | 11560,   | 170544, | 3195.2066, | 11598,   | 171516, | 3192.8534, |
| 7.990823 |         |            | 7.984942 |         |            | 7.979062 |         |            |

|          |         |            |          |         |            |          |         |            |
|----------|---------|------------|----------|---------|------------|----------|---------|------------|
| 11599,   | 170796, | 3192.7915, | 11637,   | 169476, | 3190.4383, | 11675,   | 169810, | 3188.0850, |
| 7.978907 |         |            | 7.973026 |         |            | 7.967145 |         |            |
| 11600,   | 170512, | 3192.7296, | 11638,   | 169540, | 3190.3763, | 11676,   | 169054, | 3188.0231, |
| 7.978752 |         |            | 7.972871 |         |            | 7.966990 |         |            |
| 11601,   | 170798, | 3192.6676, | 11639,   | 169500, | 3190.3144, | 11677,   | 168278, | 3187.9612, |
| 7.978597 |         |            | 7.972717 |         |            | 7.966836 |         |            |
| 11602,   | 171278, | 3192.6057, | 11640,   | 169582, | 3190.2525, | 11678,   | 168032, | 3187.8993, |
| 7.978443 |         |            | 7.972562 |         |            | 7.966681 |         |            |
| 11603,   | 171372, | 3192.5438, | 11641,   | 169640, | 3190.1906, | 11679,   | 168322, | 3187.8373, |
| 7.978288 |         |            | 7.972407 |         |            | 7.966526 |         |            |
| 11604,   | 170798, | 3192.4818, | 11642,   | 169376, | 3190.1286, | 11680,   | 168750, | 3187.7754, |
| 7.978133 |         |            | 7.972252 |         |            | 7.966371 |         |            |
| 11605,   | 169860, | 3192.4199, | 11643,   | 168782, | 3190.0667, | 11681,   | 168990, | 3187.7135, |
| 7.977978 |         |            | 7.972097 |         |            | 7.966217 |         |            |
| 11606,   | 169144, | 3192.3580, | 11644,   | 168262, | 3190.0048, | 11682,   | 169108, | 3187.6516, |
| 7.977824 |         |            | 7.971943 |         |            | 7.966062 |         |            |
| 11607,   | 168994, | 3192.2961, | 11645,   | 168242, | 3189.9428, | 11683,   | 169348, | 3187.5896, |
| 7.977669 |         |            | 7.971788 |         |            | 7.965907 |         |            |
| 11608,   | 169264, | 3192.2341, | 11646,   | 168760, | 3189.8809, | 11684,   | 169720, | 3187.5277, |
| 7.977514 |         |            | 7.971633 |         |            | 7.965752 |         |            |
| 11609,   | 169582, | 3192.1722, | 11647,   | 169422, | 3189.8190, | 11685,   | 169884, | 3187.4658, |
| 7.977359 |         |            | 7.971478 |         |            | 7.965598 |         |            |
| 11610,   | 169784, | 3192.1103, | 11648,   | 169802, | 3189.7571, | 11686,   | 169502, | 3187.4038, |
| 7.977204 |         |            | 7.971324 |         |            | 7.965443 |         |            |
| 11611,   | 170046, | 3192.0484, | 11649,   | 169798, | 3189.6951, | 11687,   | 168636, | 3187.3419, |
| 7.977050 |         |            | 7.971169 |         |            | 7.965288 |         |            |
| 11612,   | 170566, | 3191.9864, | 11650,   | 169604, | 3189.6332, | 11688,   | 167740, | 3187.2800, |
| 7.976895 |         |            | 7.971014 |         |            | 7.965133 |         |            |
| 11613,   | 171194, | 3191.9245, | 11651,   | 169366, | 3189.5713, | 11689,   | 167270, | 3187.2181, |
| 7.976740 |         |            | 7.970859 |         |            | 7.964979 |         |            |
| 11614,   | 171484, | 3191.8626, | 11652,   | 169030, | 3189.5094, | 11690,   | 167318, | 3187.1561, |
| 7.976585 |         |            | 7.970705 |         |            | 7.964824 |         |            |
| 11615,   | 171110, | 3191.8007, | 11653,   | 168510, | 3189.4474, | 11691,   | 167622, | 3187.0942, |
| 7.976431 |         |            | 7.970550 |         |            | 7.964669 |         |            |
| 11616,   | 170238, | 3191.7387, | 11654,   | 167932, | 3189.3855, | 11692,   | 167894, | 3187.0323, |
| 7.976276 |         |            | 7.970395 |         |            | 7.964514 |         |            |
| 11617,   | 169342, | 3191.6768, | 11655,   | 167608, | 3189.3236, | 11693,   | 168032, | 3186.9704, |
| 7.976121 |         |            | 7.970240 |         |            | 7.964360 |         |            |
| 11618,   | 168784, | 3191.6149, | 11656,   | 167716, | 3189.2616, | 11694,   | 168060, | 3186.9084, |
| 7.975966 |         |            | 7.970086 |         |            | 7.964205 |         |            |
| 11619,   | 168516, | 3191.5529, | 11657,   | 168106, | 3189.1997, | 11695,   | 167978, | 3186.8465, |
| 7.975812 |         |            | 7.969931 |         |            | 7.964050 |         |            |
| 11620,   | 168302, | 3191.4910, | 11658,   | 168476, | 3189.1378, | 11696,   | 167750, | 3186.7846, |
| 7.975657 |         |            | 7.969776 |         |            | 7.963895 |         |            |
| 11621,   | 168092, | 3191.4291, | 11659,   | 168724, | 3189.0759, | 11697,   | 167482, | 3186.7226, |
| 7.975502 |         |            | 7.969621 |         |            | 7.963741 |         |            |
| 11622,   | 168114, | 3191.3672, | 11660,   | 169032, | 3189.0139, | 11698,   | 167470, | 3186.6607, |
| 7.975347 |         |            | 7.969467 |         |            | 7.963586 |         |            |
| 11623,   | 168540, | 3191.3052, | 11661,   | 169556, | 3188.9520, | 11699,   | 167970, | 3186.5988, |
| 7.975193 |         |            | 7.969312 |         |            | 7.963431 |         |            |
| 11624,   | 169156, | 3191.2433, | 11662,   | 170068, | 3188.8901, | 11700,   | 168880, | 3186.5369, |
| 7.975038 |         |            | 7.969157 |         |            | 7.963276 |         |            |
| 11625,   | 169494, | 3191.1814, | 11663,   | 170058, | 3188.8282, | 11701,   | 169748, | 3186.4749, |
| 7.974883 |         |            | 7.969002 |         |            | 7.963122 |         |            |
| 11626,   | 169296, | 3191.1195, | 11664,   | 169238, | 3188.7662, | 11702,   | 170110, | 3186.4130, |
| 7.974728 |         |            | 7.968848 |         |            | 7.962967 |         |            |
| 11627,   | 168796, | 3191.0575, | 11665,   | 167918, | 3188.7043, | 11703,   | 169892, | 3186.3511, |
| 7.974574 |         |            | 7.968693 |         |            | 7.962812 |         |            |
| 11628,   | 168480, | 3190.9956, | 11666,   | 166802, | 3188.6424, | 11704,   | 169440, | 3186.2892, |
| 7.974419 |         |            | 7.968538 |         |            | 7.962657 |         |            |
| 11629,   | 168552, | 3190.9337, | 11667,   | 166394, | 3188.5805, | 11705,   | 169172, | 3186.2272, |
| 7.974264 |         |            | 7.968383 |         |            | 7.962503 |         |            |
| 11630,   | 168700, | 3190.8717, | 11668,   | 166596, | 3188.5185, | 11706,   | 169232, | 3186.1653, |
| 7.974109 |         |            | 7.968229 |         |            | 7.962348 |         |            |
| 11631,   | 168492, | 3190.8098, | 11669,   | 166970, | 3188.4566, | 11707,   | 169460, | 3186.1034, |
| 7.973955 |         |            | 7.968074 |         |            | 7.962193 |         |            |
| 11632,   | 167888, | 3190.7479, | 11670,   | 167260, | 3188.3947, | 11708,   | 169676, | 3186.0415, |
| 7.973800 |         |            | 7.967919 |         |            | 7.962038 |         |            |
| 11633,   | 167368, | 3190.6860, | 11671,   | 167636, | 3188.3327, | 11709,   | 169902, | 3185.9795, |
| 7.973645 |         |            | 7.967764 |         |            | 7.961883 |         |            |
| 11634,   | 167450, | 3190.6240, | 11672,   | 168358, | 3188.2708, | 11710,   | 170266, | 3185.9176, |
| 7.973490 |         |            | 7.967610 |         |            | 7.961729 |         |            |
| 11635,   | 168156, | 3190.5621, | 11673,   | 169300, | 3188.2089, | 11711,   | 170794, | 3185.8557, |
| 7.973336 |         |            | 7.967455 |         |            | 7.961574 |         |            |
| 11636,   | 168996, | 3190.5002, | 11674,   | 169932, | 3188.1470, | 11712,   | 171322, | 3185.7937, |
| 7.973181 |         |            | 7.967300 |         |            | 7.961419 |         |            |

|          |         |            |          |         |            |          |         |            |
|----------|---------|------------|----------|---------|------------|----------|---------|------------|
| 11713,   | 171710, | 3185.7318, | 11751,   | 169546, | 3183.3786, | 11789,   | 169820, | 3181.0254, |
| 7.961264 |         |            | 7.955384 |         |            | 7.949503 |         |            |
| 11714,   | 172028, | 3185.6699, | 11752,   | 169554, | 3183.3167, | 11790,   | 169126, | 3180.9634, |
| 7.961110 |         |            | 7.955229 |         |            | 7.949348 |         |            |
| 11715,   | 172492, | 3185.6080, | 11753,   | 169724, | 3183.2547, | 11791,   | 169014, | 3180.9015, |
| 7.960955 |         |            | 7.955074 |         |            | 7.949193 |         |            |
| 11716,   | 173210, | 3185.5460, | 11754,   | 170314, | 3183.1928, | 11792,   | 169424, | 3180.8396, |
| 7.960800 |         |            | 7.954919 |         |            | 7.949039 |         |            |
| 11717,   | 173990, | 3185.4841, | 11755,   | 171114, | 3183.1309, | 11793,   | 169946, | 3180.7777, |
| 7.960645 |         |            | 7.954765 |         |            | 7.948884 |         |            |
| 11718,   | 174474, | 3185.4222, | 11756,   | 171684, | 3183.0690, | 11794,   | 170252, | 3180.7157, |
| 7.960491 |         |            | 7.954610 |         |            | 7.948729 |         |            |
| 11719,   | 174434, | 3185.3603, | 11757,   | 171760, | 3183.0070, | 11795,   | 170388, | 3180.6538, |
| 7.960336 |         |            | 7.954455 |         |            | 7.948574 |         |            |
| 11720,   | 173964, | 3185.2983, | 11758,   | 171472, | 3182.9451, | 11796,   | 170602, | 3180.5919, |
| 7.960181 |         |            | 7.954300 |         |            | 7.948420 |         |            |
| 11721,   | 173366, | 3185.2364, | 11759,   | 171126, | 3182.8832, | 11797,   | 170952, | 3180.5300, |
| 7.960026 |         |            | 7.954146 |         |            | 7.948265 |         |            |
| 11722,   | 172898, | 3185.1745, | 11760,   | 170810, | 3182.8213, | 11798,   | 171166, | 3180.4680, |
| 7.959872 |         |            | 7.953991 |         |            | 7.948110 |         |            |
| 11723,   | 172648, | 3185.1125, | 11761,   | 170360, | 3182.7593, | 11799,   | 170918, | 3180.4061, |
| 7.959717 |         |            | 7.953836 |         |            | 7.947955 |         |            |
| 11724,   | 172574, | 3185.0506, | 11762,   | 169554, | 3182.6974, | 11800,   | 170204, | 3180.3442, |
| 7.959562 |         |            | 7.953681 |         |            | 7.947801 |         |            |
| 11725,   | 172600, | 3184.9887, | 11763,   | 168458, | 3182.6355, | 11801,   | 169400, | 3180.2822, |
| 7.959407 |         |            | 7.953527 |         |            | 7.947646 |         |            |
| 11726,   | 172642, | 3184.9268, | 11764,   | 167400, | 3182.5735, | 11802,   | 168886, | 3180.2203, |
| 7.959253 |         |            | 7.953372 |         |            | 7.947491 |         |            |
| 11727,   | 172576, | 3184.8648, | 11765,   | 166724, | 3182.5116, | 11803,   | 168716, | 3180.1584, |
| 7.959098 |         |            | 7.953217 |         |            | 7.947336 |         |            |
| 11728,   | 172324, | 3184.8029, | 11766,   | 166584, | 3182.4497, | 11804,   | 168698, | 3180.0965, |
| 7.958943 |         |            | 7.953062 |         |            | 7.947182 |         |            |
| 11729,   | 171942, | 3184.7410, | 11767,   | 166880, | 3182.3878, | 11805,   | 168684, | 3180.0345, |
| 7.958788 |         |            | 7.952908 |         |            | 7.947027 |         |            |
| 11730,   | 171630, | 3184.6791, | 11768,   | 167434, | 3182.3258, | 11806,   | 168784, | 3179.9726, |
| 7.958634 |         |            | 7.952753 |         |            | 7.946872 |         |            |
| 11731,   | 171542, | 3184.6171, | 11769,   | 168094, | 3182.2639, | 11807,   | 169166, | 3179.9107, |
| 7.958479 |         |            | 7.952598 |         |            | 7.946717 |         |            |
| 11732,   | 171590, | 3184.5552, | 11770,   | 168724, | 3182.2020, | 11808,   | 169740, | 3179.8488, |
| 7.958324 |         |            | 7.952443 |         |            | 7.946562 |         |            |
| 11733,   | 171458, | 3184.4933, | 11771,   | 169222, | 3182.1401, | 11809,   | 170144, | 3179.7868, |
| 7.958169 |         |            | 7.952289 |         |            | 7.946408 |         |            |
| 11734,   | 170948, | 3184.4314, | 11772,   | 169576, | 3182.0781, | 11810,   | 170114, | 3179.7249, |
| 7.958015 |         |            | 7.952134 |         |            | 7.946253 |         |            |
| 11735,   | 170192, | 3184.3694, | 11773,   | 169926, | 3182.0162, | 11811,   | 169826, | 3179.6630, |
| 7.957860 |         |            | 7.951979 |         |            | 7.946098 |         |            |
| 11736,   | 169564, | 3184.3075, | 11774,   | 170496, | 3181.9543, | 11812,   | 169782, | 3179.6011, |
| 7.957705 |         |            | 7.951824 |         |            | 7.945943 |         |            |
| 11737,   | 169336, | 3184.2456, | 11775,   | 171386, | 3181.8923, | 11813,   | 170318, | 3179.5391, |
| 7.957550 |         |            | 7.951669 |         |            | 7.945789 |         |            |
| 11738,   | 169394, | 3184.1836, | 11776,   | 172462, | 3181.8304, | 11814,   | 171238, | 3179.4772, |
| 7.957396 |         |            | 7.951515 |         |            | 7.945634 |         |            |
| 11739,   | 169418, | 3184.1217, | 11777,   | 173434, | 3181.7685, | 11815,   | 171984, | 3179.4153, |
| 7.957241 |         |            | 7.951360 |         |            | 7.945479 |         |            |
| 11740,   | 169232, | 3184.0598, | 11778,   | 174042, | 3181.7066, | 11816,   | 172152, | 3179.3533, |
| 7.957086 |         |            | 7.951205 |         |            | 7.945324 |         |            |
| 11741,   | 168998, | 3183.9979, | 11779,   | 174208, | 3181.6446, | 11817,   | 171810, | 3179.2914, |
| 7.956931 |         |            | 7.951050 |         |            | 7.945170 |         |            |
| 11742,   | 168998, | 3183.9359, | 11780,   | 173956, | 3181.5827, | 11818,   | 171334, | 3179.2295, |
| 7.956776 |         |            | 7.950896 |         |            | 7.945015 |         |            |
| 11743,   | 169232, | 3183.8740, | 11781,   | 173356, | 3181.5208, | 11819,   | 171000, | 3179.1676, |
| 7.956622 |         |            | 7.950741 |         |            | 7.944860 |         |            |
| 11744,   | 169360, | 3183.8121, | 11782,   | 172512, | 3181.4589, | 11820,   | 170762, | 3179.1056, |
| 7.956467 |         |            | 7.950586 |         |            | 7.944705 |         |            |
| 11745,   | 169068, | 3183.7502, | 11783,   | 171654, | 3181.3969, | 11821,   | 170464, | 3179.0437, |
| 7.956312 |         |            | 7.950431 |         |            | 7.944551 |         |            |
| 11746,   | 168454, | 3183.6882, | 11784,   | 171104, | 3181.3350, | 11822,   | 170128, | 3178.9818, |
| 7.956157 |         |            | 7.950277 |         |            | 7.944396 |         |            |
| 11747,   | 167998, | 3183.6263, | 11785,   | 171024, | 3181.2731, | 11823,   | 169930, | 3178.9199, |
| 7.956003 |         |            | 7.950122 |         |            | 7.944241 |         |            |
| 11748,   | 168096, | 3183.5644, | 11786,   | 171208, | 3181.2112, | 11824,   | 169966, | 3178.8579, |
| 7.955848 |         |            | 7.949967 |         |            | 7.944086 |         |            |
| 11749,   | 168682, | 3183.5024, | 11787,   | 171198, | 3181.1492, | 11825,   | 170062, | 3178.7960, |
| 7.955693 |         |            | 7.949812 |         |            | 7.943932 |         |            |
| 11750,   | 169286, | 3183.4405, | 11788,   | 170682, | 3181.0873, | 11826,   | 170004, | 3178.7341, |
| 7.955538 |         |            | 7.949658 |         |            | 7.943777 |         |            |

|          |         |            |          |         |            |          |         |            |
|----------|---------|------------|----------|---------|------------|----------|---------|------------|
| 11827,   | 169810, | 3178.6721, | 11865,   | 169188, | 3176.3189, | 11903,   | 173094, | 3173.9657, |
| 7.943622 |         |            | 7.937741 |         |            | 7.931860 |         |            |
| 11828,   | 169776, | 3178.6102, | 11866,   | 168838, | 3176.2570, | 11904,   | 173156, | 3173.9038, |
| 7.943467 |         |            | 7.937587 |         |            | 7.931706 |         |            |
| 11829,   | 170118, | 3178.5483, | 11867,   | 168310, | 3176.1951, | 11905,   | 173008, | 3173.8419, |
| 7.943313 |         |            | 7.937432 |         |            | 7.931551 |         |            |
| 11830,   | 170670, | 3178.4864, | 11868,   | 168096, | 3176.1331, | 11906,   | 172946, | 3173.7799, |
| 7.943158 |         |            | 7.937277 |         |            | 7.931396 |         |            |
| 11831,   | 170976, | 3178.4244, | 11869,   | 168342, | 3176.0712, | 11907,   | 173078, | 3173.7180, |
| 7.943003 |         |            | 7.937122 |         |            | 7.931241 |         |            |
| 11832,   | 170748, | 3178.3625, | 11870,   | 168842, | 3176.0093, | 11908,   | 173312, | 3173.6561, |
| 7.942848 |         |            | 7.936967 |         |            | 7.931087 |         |            |
| 11833,   | 170192, | 3178.3006, | 11871,   | 169340, | 3175.9474, | 11909,   | 173530, | 3173.5941, |
| 7.942694 |         |            | 7.936813 |         |            | 7.930932 |         |            |
| 11834,   | 169836, | 3178.2387, | 11872,   | 169724, | 3175.8854, | 11910,   | 173674, | 3173.5322, |
| 7.942539 |         |            | 7.936658 |         |            | 7.930777 |         |            |
| 11835,   | 170012, | 3178.1767, | 11873,   | 169960, | 3175.8235, | 11911,   | 173700, | 3173.4703, |
| 7.942384 |         |            | 7.936503 |         |            | 7.930622 |         |            |
| 11836,   | 170590, | 3178.1148, | 11874,   | 169992, | 3175.7616, | 11912,   | 173556, | 3173.4084, |
| 7.942229 |         |            | 7.936348 |         |            | 7.930468 |         |            |
| 11837,   | 171204, | 3178.0529, | 11875,   | 169786, | 3175.6997, | 11913,   | 173194, | 3173.3464, |
| 7.942075 |         |            | 7.936194 |         |            | 7.930313 |         |            |
| 11838,   | 171636, | 3177.9910, | 11876,   | 169512, | 3175.6377, | 11914,   | 172692, | 3173.2845, |
| 7.941920 |         |            | 7.936039 |         |            | 7.930158 |         |            |
| 11839,   | 171972, | 3177.9290, | 11877,   | 169492, | 3175.5758, | 11915,   | 172272, | 3173.2226, |
| 7.941765 |         |            | 7.935884 |         |            | 7.930003 |         |            |
| 11840,   | 172316, | 3177.8671, | 11878,   | 169966, | 3175.5139, | 11916,   | 172124, | 3173.1607, |
| 7.941610 |         |            | 7.935729 |         |            | 7.929849 |         |            |
| 11841,   | 172500, | 3177.8052, | 11879,   | 170794, | 3175.4520, | 11917,   | 172252, | 3173.0987, |
| 7.941455 |         |            | 7.935575 |         |            | 7.929694 |         |            |
| 11842,   | 172224, | 3177.7432, | 11880,   | 171534, | 3175.3900, | 11918,   | 172472, | 3173.0368, |
| 7.941301 |         |            | 7.935420 |         |            | 7.929539 |         |            |
| 11843,   | 171438, | 3177.6813, | 11881,   | 171806, | 3175.3281, | 11919,   | 172556, | 3172.9749, |
| 7.941146 |         |            | 7.935265 |         |            | 7.929384 |         |            |
| 11844,   | 170546, | 3177.6194, | 11882,   | 171608, | 3175.2662, | 11920,   | 172410, | 3172.9129, |
| 7.940991 |         |            | 7.935110 |         |            | 7.929230 |         |            |
| 11845,   | 170094, | 3177.5575, | 11883,   | 171242, | 3175.2042, | 11921,   | 172068, | 3172.8510, |
| 7.940836 |         |            | 7.934956 |         |            | 7.929075 |         |            |
| 11846,   | 170260, | 3177.4955, | 11884,   | 170970, | 3175.1423, | 11922,   | 171602, | 3172.7891, |
| 7.940682 |         |            | 7.934801 |         |            | 7.928920 |         |            |
| 11847,   | 170668, | 3177.4336, | 11885,   | 170774, | 3175.0804, | 11923,   | 171052, | 3172.7272, |
| 7.940527 |         |            | 7.934646 |         |            | 7.928765 |         |            |
| 11848,   | 170768, | 3177.3717, | 11886,   | 170474, | 3175.0185, | 11924,   | 170474, | 3172.6652, |
| 7.940372 |         |            | 7.934491 |         |            | 7.928611 |         |            |
| 11849,   | 170360, | 3177.3098, | 11887,   | 170040, | 3174.9565, | 11925,   | 170020, | 3172.6033, |
| 7.940217 |         |            | 7.934337 |         |            | 7.928456 |         |            |
| 11850,   | 169732, | 3177.2478, | 11888,   | 169674, | 3174.8946, | 11926,   | 169866, | 3172.5414, |
| 7.940063 |         |            | 7.934182 |         |            | 7.928301 |         |            |
| 11851,   | 169270, | 3177.1859, | 11889,   | 169598, | 3174.8327, | 11927,   | 170066, | 3172.4795, |
| 7.939908 |         |            | 7.934027 |         |            | 7.928146 |         |            |
| 11852,   | 169072, | 3177.1240, | 11890,   | 169768, | 3174.7708, | 11928,   | 170484, | 3172.4175, |
| 7.939753 |         |            | 7.933872 |         |            | 7.927992 |         |            |
| 11853,   | 168964, | 3177.0620, | 11891,   | 169906, | 3174.7088, | 11929,   | 170882, | 3172.3556, |
| 7.939598 |         |            | 7.933718 |         |            | 7.927837 |         |            |
| 11854,   | 168842, | 3177.0001, | 11892,   | 169796, | 3174.6469, | 11930,   | 171106, | 3172.2937, |
| 7.939444 |         |            | 7.933563 |         |            | 7.927682 |         |            |
| 11855,   | 168898, | 3176.9382, | 11893,   | 169530, | 3174.5850, | 11931,   | 171172, | 3172.2318, |
| 7.939289 |         |            | 7.933408 |         |            | 7.927527 |         |            |
| 11856,   | 169338, | 3176.8763, | 11894,   | 169396, | 3174.5230, | 11932,   | 171202, | 3172.1698, |
| 7.939134 |         |            | 7.933253 |         |            | 7.927373 |         |            |
| 11857,   | 170008, | 3176.8143, | 11895,   | 169544, | 3174.4611, | 11933,   | 171274, | 3172.1079, |
| 7.938979 |         |            | 7.933099 |         |            | 7.927218 |         |            |
| 11858,   | 170346, | 3176.7524, | 11896,   | 169838, | 3174.3992, | 11934,   | 171374, | 3172.0460, |
| 7.938825 |         |            | 7.932944 |         |            | 7.927063 |         |            |
| 11859,   | 169900, | 3176.6905, | 11897,   | 170018, | 3174.3373, | 11935,   | 171456, | 3171.9840, |
| 7.938670 |         |            | 7.932789 |         |            | 7.926908 |         |            |
| 11860,   | 168826, | 3176.6286, | 11898,   | 170066, | 3174.2753, | 11936,   | 171520, | 3171.9221, |
| 7.938515 |         |            | 7.932634 |         |            | 7.926753 |         |            |
| 11861,   | 167848, | 3176.5666, | 11899,   | 170228, | 3174.2134, | 11937,   | 171604, | 3171.8602, |
| 7.938360 |         |            | 7.932480 |         |            | 7.926599 |         |            |
| 11862,   | 167638, | 3176.5047, | 11900,   | 170780, | 3174.1515, | 11938,   | 171726, | 3171.7983, |
| 7.938206 |         |            | 7.932325 |         |            | 7.926444 |         |            |
| 11863,   | 168210, | 3176.4428, | 11901,   | 171684, | 3174.0896, | 11939,   | 171890, | 3171.7363, |
| 7.938051 |         |            | 7.932170 |         |            | 7.926289 |         |            |
| 11864,   | 168942, | 3176.3809, | 11902,   | 172580, | 3174.0276, | 11940,   | 172140, | 3171.6744, |
| 7.937896 |         |            | 7.932015 |         |            | 7.926134 |         |            |

|          |         |            |          |         |            |          |         |            |
|----------|---------|------------|----------|---------|------------|----------|---------|------------|
| 11941,   | 172538, | 3171.6125, | 11979,   | 172102, | 3169.2593, | 12017,   | 173152, | 3166.9060, |
| 7.925980 |         |            | 7.920099 |         |            | 7.914218 |         |            |
| 11942,   | 173056, | 3171.5506, | 11980,   | 170904, | 3169.1973, | 12018,   | 172724, | 3166.8441, |
| 7.925825 |         |            | 7.919944 |         |            | 7.914063 |         |            |
| 11943,   | 173534, | 3171.4886, | 11981,   | 170086, | 3169.1354, | 12019,   | 172258, | 3166.7822, |
| 7.925670 |         |            | 7.919789 |         |            | 7.913909 |         |            |
| 11944,   | 173746, | 3171.4267, | 11982,   | 170014, | 3169.0735, | 12020,   | 171900, | 3166.7203, |
| 7.925515 |         |            | 7.919635 |         |            | 7.913754 |         |            |
| 11945,   | 173606, | 3171.3648, | 11983,   | 170508, | 3169.0116, | 12021,   | 171608, | 3166.6583, |
| 7.925361 |         |            | 7.919480 |         |            | 7.913599 |         |            |
| 11946,   | 173300, | 3171.3028, | 11984,   | 171070, | 3168.9496, | 12022,   | 171306, | 3166.5964, |
| 7.925206 |         |            | 7.919325 |         |            | 7.913444 |         |            |
| 11947,   | 173122, | 3171.2409, | 11985,   | 171270, | 3168.8877, | 12023,   | 170998, | 3166.5345, |
| 7.925051 |         |            | 7.919170 |         |            | 7.913290 |         |            |
| 11948,   | 173200, | 3171.1790, | 11986,   | 170976, | 3168.8258, | 12024,   | 170722, | 3166.4725, |
| 7.924896 |         |            | 7.919016 |         |            | 7.913135 |         |            |
| 11949,   | 173352, | 3171.1171, | 11987,   | 170318, | 3168.7638, | 12025,   | 170480, | 3166.4106, |
| 7.924742 |         |            | 7.918861 |         |            | 7.912980 |         |            |
| 11950,   | 173282, | 3171.0551, | 11988,   | 169566, | 3168.7019, | 12026,   | 170236, | 3166.3487, |
| 7.924587 |         |            | 7.918706 |         |            | 7.912825 |         |            |
| 11951,   | 172920, | 3170.9932, | 11989,   | 169006, | 3168.6400, | 12027,   | 170054, | 3166.2868, |
| 7.924432 |         |            | 7.918551 |         |            | 7.912671 |         |            |
| 11952,   | 172508, | 3170.9313, | 11990,   | 168846, | 3168.5781, | 12028,   | 170124, | 3166.2248, |
| 7.924277 |         |            | 7.918397 |         |            | 7.912516 |         |            |
| 11953,   | 172360, | 3170.8694, | 11991,   | 169116, | 3168.5161, | 12029,   | 170622, | 3166.1629, |
| 7.924123 |         |            | 7.918242 |         |            | 7.912361 |         |            |
| 11954,   | 172510, | 3170.8074, | 11992,   | 169626, | 3168.4542, | 12030,   | 171474, | 3166.1010, |
| 7.923968 |         |            | 7.918087 |         |            | 7.912206 |         |            |
| 11955,   | 172672, | 3170.7455, | 11993,   | 170102, | 3168.3923, | 12031,   | 172374, | 3166.0391, |
| 7.923813 |         |            | 7.917932 |         |            | 7.912052 |         |            |
| 11956,   | 172544, | 3170.6836, | 11994,   | 170442, | 3168.3304, | 12032,   | 173022, | 3165.9771, |
| 7.923658 |         |            | 7.917778 |         |            | 7.911897 |         |            |
| 11957,   | 172156, | 3170.6217, | 11995,   | 170790, | 3168.2684, | 12033,   | 173356, | 3165.9152, |
| 7.923504 |         |            | 7.917623 |         |            | 7.911742 |         |            |
| 11958,   | 171836, | 3170.5597, | 11996,   | 171412, | 3168.2065, | 12034,   | 173564, | 3165.8533, |
| 7.923349 |         |            | 7.917468 |         |            | 7.911587 |         |            |
| 11959,   | 171868, | 3170.4978, | 11997,   | 172342, | 3168.1446, | 12035,   | 173804, | 3165.7914, |
| 7.923194 |         |            | 7.917313 |         |            | 7.911432 |         |            |
| 11960,   | 172166, | 3170.4359, | 11998,   | 173286, | 3168.0826, | 12036,   | 174022, | 3165.7294, |
| 7.923039 |         |            | 7.917159 |         |            | 7.911278 |         |            |
| 11961,   | 172370, | 3170.3739, | 11999,   | 173860, | 3168.0207, | 12037,   | 173990, | 3165.6675, |
| 7.922885 |         |            | 7.917004 |         |            | 7.911123 |         |            |
| 11962,   | 172202, | 3170.3120, | 12000,   | 173902, | 3167.9588, | 12038,   | 173602, | 3165.6056, |
| 7.922730 |         |            | 7.916849 |         |            | 7.910968 |         |            |
| 11963,   | 171726, | 3170.2501, | 12001,   | 173598, | 3167.8969, | 12039,   | 173008, | 3165.5436, |
| 7.922575 |         |            | 7.916694 |         |            | 7.910813 |         |            |
| 11964,   | 171204, | 3170.1882, | 12002,   | 173236, | 3167.8349, | 12040,   | 172520, | 3165.4817, |
| 7.922420 |         |            | 7.916539 |         |            | 7.910659 |         |            |
| 11965,   | 170814, | 3170.1262, | 12003,   | 172896, | 3167.7730, | 12041,   | 172342, | 3165.4198, |
| 7.922266 |         |            | 7.916385 |         |            | 7.910504 |         |            |
| 11966,   | 170494, | 3170.0643, | 12004,   | 172456, | 3167.7111, | 12042,   | 172464, | 3165.3579, |
| 7.922111 |         |            | 7.916230 |         |            | 7.910349 |         |            |
| 11967,   | 170162, | 3170.0024, | 12005,   | 171848, | 3167.6492, | 12043,   | 172710, | 3165.2959, |
| 7.921956 |         |            | 7.916075 |         |            | 7.910194 |         |            |
| 11968,   | 169888, | 3169.9405, | 12006,   | 171288, | 3167.5872, | 12044,   | 172940, | 3165.2340, |
| 7.921801 |         |            | 7.915920 |         |            | 7.910040 |         |            |
| 11969,   | 169896, | 3169.8785, | 12007,   | 171128, | 3167.5253, | 12045,   | 173066, | 3165.1721, |
| 7.921646 |         |            | 7.915766 |         |            | 7.909885 |         |            |
| 11970,   | 170242, | 3169.8166, | 12008,   | 171490, | 3167.4634, | 12046,   | 173050, | 3165.1102, |
| 7.921492 |         |            | 7.915611 |         |            | 7.909730 |         |            |
| 11971,   | 170708, | 3169.7547, | 12009,   | 172068, | 3167.4015, | 12047,   | 172858, | 3165.0482, |
| 7.921337 |         |            | 7.915456 |         |            | 7.909575 |         |            |
| 11972,   | 170962, | 3169.6927, | 12010,   | 172382, | 3167.3395, | 12048,   | 172550, | 3164.9863, |
| 7.921182 |         |            | 7.915301 |         |            | 7.909421 |         |            |
| 11973,   | 170954, | 3169.6308, | 12011,   | 172242, | 3167.2776, | 12049,   | 172276, | 3164.9244, |
| 7.921027 |         |            | 7.915147 |         |            | 7.909266 |         |            |
| 11974,   | 171004, | 3169.5689, | 12012,   | 171924, | 3167.2157, | 12050,   | 172192, | 3164.8624, |
| 7.920873 |         |            | 7.914992 |         |            | 7.909111 |         |            |
| 11975,   | 171472, | 3169.5070, | 12013,   | 171880, | 3167.1537, | 12051,   | 172282, | 3164.8005, |
| 7.920718 |         |            | 7.914837 |         |            | 7.908956 |         |            |
| 11976,   | 172318, | 3169.4450, | 12014,   | 172296, | 3167.0918, | 12052,   | 172352, | 3164.7386, |
| 7.920563 |         |            | 7.914682 |         |            | 7.908802 |         |            |
| 11977,   | 173010, | 3169.3831, | 12015,   | 172902, | 3167.0299, | 12053,   | 172264, | 3164.6767, |
| 7.920408 |         |            | 7.914528 |         |            | 7.908647 |         |            |
| 11978,   | 172972, | 3169.3212, | 12016,   | 173258, | 3166.9680, | 12054,   | 172108, | 3164.6147, |
| 7.920254 |         |            | 7.914373 |         |            | 7.908492 |         |            |

|          |         |            |          |         |            |          |         |            |
|----------|---------|------------|----------|---------|------------|----------|---------|------------|
| 12055,   | 172192, | 3164.5528, | 12093,   | 168870, | 3162.1996, | 12131,   | 171474, | 3159.8464, |
| 7.908337 |         |            | 7.902457 |         |            | 7.896576 |         |            |
| 12056,   | 172712, | 3164.4909, | 12094,   | 168086, | 3162.1377, | 12132,   | 171822, | 3159.7844, |
| 7.908183 |         |            | 7.902302 |         |            | 7.896421 |         |            |
| 12057,   | 173532, | 3164.4290, | 12095,   | 167364, | 3162.0757, | 12133,   | 172502, | 3159.7225, |
| 7.908028 |         |            | 7.902147 |         |            | 7.896266 |         |            |
| 12058,   | 174296, | 3164.3670, | 12096,   | 166982, | 3162.0138, | 12134,   | 173046, | 3159.6606, |
| 7.907873 |         |            | 7.901992 |         |            | 7.896111 |         |            |
| 12059,   | 174772, | 3164.3051, | 12097,   | 167014, | 3161.9519, | 12135,   | 173144, | 3159.5987, |
| 7.907718 |         |            | 7.901838 |         |            | 7.895957 |         |            |
| 12060,   | 175084, | 3164.2432, | 12098,   | 167450, | 3161.8900, | 12136,   | 172950, | 3159.5367, |
| 7.907564 |         |            | 7.901683 |         |            | 7.895802 |         |            |
| 12061,   | 175502, | 3164.1813, | 12099,   | 168236, | 3161.8280, | 12137,   | 172860, | 3159.4748, |
| 7.907409 |         |            | 7.901528 |         |            | 7.895647 |         |            |
| 12062,   | 176074, | 3164.1193, | 12100,   | 169254, | 3161.7661, | 12138,   | 173100, | 3159.4129, |
| 7.907254 |         |            | 7.901373 |         |            | 7.895492 |         |            |
| 12063,   | 176476, | 3164.0574, | 12101,   | 170300, | 3161.7042, | 12139,   | 173438, | 3159.3510, |
| 7.907099 |         |            | 7.901218 |         |            | 7.895338 |         |            |
| 12064,   | 176302, | 3163.9955, | 12102,   | 171238, | 3161.6423, | 12140,   | 173464, | 3159.2890, |
| 7.906945 |         |            | 7.901064 |         |            | 7.895183 |         |            |
| 12065,   | 175488, | 3163.9335, | 12103,   | 172106, | 3161.5803, | 12141,   | 173048, | 3159.2271, |
| 7.906790 |         |            | 7.900909 |         |            | 7.895028 |         |            |
| 12066,   | 174406, | 3163.8716, | 12104,   | 173058, | 3161.5184, | 12142,   | 172482, | 3159.1652, |
| 7.906635 |         |            | 7.900754 |         |            | 7.894873 |         |            |
| 12067,   | 173504, | 3163.8097, | 12105,   | 174088, | 3161.4565, | 12143,   | 172150, | 3159.1032, |
| 7.906480 |         |            | 7.900599 |         |            | 7.894719 |         |            |
| 12068,   | 172908, | 3163.7478, | 12106,   | 174898, | 3161.3945, | 12144,   | 172106, | 3159.0413, |
| 7.906325 |         |            | 7.900445 |         |            | 7.894564 |         |            |
| 12069,   | 172418, | 3163.6858, | 12107,   | 175096, | 3161.3326, | 12145,   | 172032, | 3158.9794, |
| 7.906171 |         |            | 7.900290 |         |            | 7.894409 |         |            |
| 12070,   | 171812, | 3163.6239, | 12108,   | 174594, | 3161.2707, | 12146,   | 171622, | 3158.9175, |
| 7.906016 |         |            | 7.900135 |         |            | 7.894254 |         |            |
| 12071,   | 171164, | 3163.5620, | 12109,   | 173784, | 3161.2088, | 12147,   | 170956, | 3158.8555, |
| 7.905861 |         |            | 7.899980 |         |            | 7.894100 |         |            |
| 12072,   | 170718, | 3163.5001, | 12110,   | 173230, | 3161.1468, | 12148,   | 170444, | 3158.7936, |
| 7.905706 |         |            | 7.899826 |         |            | 7.893945 |         |            |
| 12073,   | 170558, | 3163.4381, | 12111,   | 173184, | 3161.0849, | 12149,   | 170380, | 3158.7317, |
| 7.905552 |         |            | 7.899671 |         |            | 7.893790 |         |            |
| 12074,   | 170474, | 3163.3762, | 12112,   | 173396, | 3161.0230, | 12150,   | 170650, | 3158.6698, |
| 7.905397 |         |            | 7.899516 |         |            | 7.893635 |         |            |
| 12075,   | 170208, | 3163.3143, | 12113,   | 173410, | 3160.9611, | 12151,   | 170856, | 3158.6078, |
| 7.905242 |         |            | 7.899361 |         |            | 7.893481 |         |            |
| 12076,   | 169806, | 3163.2523, | 12114,   | 173040, | 3160.8991, | 12152,   | 170798, | 3158.5459, |
| 7.905087 |         |            | 7.899207 |         |            | 7.893326 |         |            |
| 12077,   | 169636, | 3163.1904, | 12115,   | 172508, | 3160.8372, | 12153,   | 170650, | 3158.4840, |
| 7.904933 |         |            | 7.899052 |         |            | 7.893171 |         |            |
| 12078,   | 170012, | 3163.1285, | 12116,   | 172188, | 3160.7753, | 12154,   | 170776, | 3158.4221, |
| 7.904778 |         |            | 7.898897 |         |            | 7.893016 |         |            |
| 12079,   | 170800, | 3163.0666, | 12117,   | 172198, | 3160.7133, | 12155,   | 171316, | 3158.3601, |
| 7.904623 |         |            | 7.898742 |         |            | 7.892862 |         |            |
| 12080,   | 171534, | 3163.0046, | 12118,   | 172372, | 3160.6514, | 12156,   | 172064, | 3158.2982, |
| 7.904468 |         |            | 7.898588 |         |            | 7.892707 |         |            |
| 12081,   | 171816, | 3162.9427, | 12119,   | 172524, | 3160.5895, | 12157,   | 172694, | 3158.2363, |
| 7.904314 |         |            | 7.898433 |         |            | 7.892552 |         |            |
| 12082,   | 171668, | 3162.8808, | 12120,   | 172720, | 3160.5276, | 12158,   | 173084, | 3158.1743, |
| 7.904159 |         |            | 7.898278 |         |            | 7.892397 |         |            |
| 12083,   | 171390, | 3162.8189, | 12121,   | 173154, | 3160.4656, | 12159,   | 173372, | 3158.1124, |
| 7.904004 |         |            | 7.898123 |         |            | 7.892243 |         |            |
| 12084,   | 171156, | 3162.7569, | 12122,   | 173868, | 3160.4037, | 12160,   | 173708, | 3158.0505, |
| 7.903849 |         |            | 7.897969 |         |            | 7.892088 |         |            |
| 12085,   | 170802, | 3162.6950, | 12123,   | 174610, | 3160.3418, | 12161,   | 174054, | 3157.9886, |
| 7.903695 |         |            | 7.897814 |         |            | 7.891933 |         |            |
| 12086,   | 170080, | 3162.6331, | 12124,   | 175024, | 3160.2799, | 12162,   | 174210, | 3157.9266, |
| 7.903540 |         |            | 7.897659 |         |            | 7.891778 |         |            |
| 12087,   | 169076, | 3162.5712, | 12125,   | 174948, | 3160.2179, | 12163,   | 174080, | 3157.8647, |
| 7.903385 |         |            | 7.897504 |         |            | 7.891623 |         |            |
| 12088,   | 168250, | 3162.5092, | 12126,   | 174492, | 3160.1560, | 12164,   | 173792, | 3157.8028, |
| 7.903230 |         |            | 7.897350 |         |            | 7.891469 |         |            |
| 12089,   | 168058, | 3162.4473, | 12127,   | 173848, | 3160.0941, | 12165,   | 173582, | 3157.7409, |
| 7.903076 |         |            | 7.897195 |         |            | 7.891314 |         |            |
| 12090,   | 168508, | 3162.3854, | 12128,   | 173114, | 3160.0322, | 12166,   | 173574, | 3157.6789, |
| 7.902921 |         |            | 7.897040 |         |            | 7.891159 |         |            |
| 12091,   | 169110, | 3162.3234, | 12129,   | 172336, | 3159.9702, | 12167,   | 173694, | 3157.6170, |
| 7.902766 |         |            | 7.896885 |         |            | 7.891004 |         |            |
| 12092,   | 169294, | 3162.2615, | 12130,   | 171696, | 3159.9083, | 12168,   | 173772, | 3157.5551, |
| 7.902611 |         |            | 7.896731 |         |            | 7.890850 |         |            |

|          |         |            |          |         |            |          |         |            |
|----------|---------|------------|----------|---------|------------|----------|---------|------------|
| 12169,   | 173672, | 3157.4931, | 12207,   | 172476, | 3155.1399, | 12245,   | 172674, | 3152.7867, |
| 7.890695 |         |            | 7.884814 |         |            | 7.878933 |         |            |
| 12170,   | 173336, | 3157.4312, | 12208,   | 172706, | 3155.0780, | 12246,   | 172468, | 3152.7248, |
| 7.890540 |         |            | 7.884659 |         |            | 7.878779 |         |            |
| 12171,   | 172760, | 3157.3693, | 12209,   | 172902, | 3155.0161, | 12247,   | 172502, | 3152.6628, |
| 7.890385 |         |            | 7.884505 |         |            | 7.878624 |         |            |
| 12172,   | 171996, | 3157.3074, | 12210,   | 172922, | 3154.9541, | 12248,   | 172634, | 3152.6009, |
| 7.890231 |         |            | 7.884350 |         |            | 7.878469 |         |            |
| 12173,   | 171180, | 3157.2454, | 12211,   | 172738, | 3154.8922, | 12249,   | 172740, | 3152.5390, |
| 7.890076 |         |            | 7.884195 |         |            | 7.878314 |         |            |
| 12174,   | 170446, | 3157.1835, | 12212,   | 172516, | 3154.8303, | 12250,   | 172896, | 3152.4771, |
| 7.889921 |         |            | 7.884040 |         |            | 7.878160 |         |            |
| 12175,   | 169818, | 3157.1216, | 12213,   | 172446, | 3154.7684, | 12251,   | 173246, | 3152.4151, |
| 7.889766 |         |            | 7.883886 |         |            | 7.878005 |         |            |
| 12176,   | 169150, | 3157.0597, | 12214,   | 172508, | 3154.7064, | 12252,   | 173720, | 3152.3532, |
| 7.889612 |         |            | 7.883731 |         |            | 7.877850 |         |            |
| 12177,   | 168264, | 3156.9977, | 12215,   | 172506, | 3154.6445, | 12253,   | 173968, | 3152.2913, |
| 7.889457 |         |            | 7.883576 |         |            | 7.877695 |         |            |
| 12178,   | 167222, | 3156.9358, | 12216,   | 172364, | 3154.5826, | 12254,   | 173636, | 3152.2294, |
| 7.889302 |         |            | 7.883421 |         |            | 7.877541 |         |            |
| 12179,   | 166424, | 3156.8739, | 12217,   | 172306, | 3154.5207, | 12255,   | 172752, | 3152.1674, |
| 7.889147 |         |            | 7.883267 |         |            | 7.877386 |         |            |
| 12180,   | 166334, | 3156.8120, | 12218,   | 172702, | 3154.4587, | 12256,   | 171718, | 3152.1055, |
| 7.888993 |         |            | 7.883112 |         |            | 7.877231 |         |            |
| 12181,   | 167040, | 3156.7500, | 12219,   | 173668, | 3154.3968, | 12257,   | 170960, | 3152.0436, |
| 7.888838 |         |            | 7.882957 |         |            | 7.877076 |         |            |
| 12182,   | 168176, | 3156.6881, | 12220,   | 174896, | 3154.3349, | 12258,   | 170564, | 3151.9817, |
| 7.888683 |         |            | 7.882802 |         |            | 7.876922 |         |            |
| 12183,   | 169184, | 3156.6262, | 12221,   | 175900, | 3154.2729, | 12259,   | 170320, | 3151.9197, |
| 7.888528 |         |            | 7.882648 |         |            | 7.876767 |         |            |
| 12184,   | 169814, | 3156.5642, | 12222,   | 176448, | 3154.2110, | 12260,   | 170042, | 3151.8578, |
| 7.888374 |         |            | 7.882493 |         |            | 7.876612 |         |            |
| 12185,   | 170250, | 3156.5023, | 12223,   | 176662, | 3154.1491, | 12261,   | 169842, | 3151.7959, |
| 7.888219 |         |            | 7.882338 |         |            | 7.876457 |         |            |
| 12186,   | 170782, | 3156.4404, | 12224,   | 176760, | 3154.0872, | 12262,   | 169966, | 3151.7339, |
| 7.888064 |         |            | 7.882183 |         |            | 7.876302 |         |            |
| 12187,   | 171384, | 3156.3785, | 12225,   | 176708, | 3154.0252, | 12263,   | 170456, | 3151.6720, |
| 7.887909 |         |            | 7.882029 |         |            | 7.876148 |         |            |
| 12188,   | 171692, | 3156.3165, | 12226,   | 176254, | 3153.9633, | 12264,   | 171042, | 3151.6101, |
| 7.887755 |         |            | 7.881874 |         |            | 7.875993 |         |            |
| 12189,   | 171400, | 3156.2546, | 12227,   | 175326, | 3153.9014, | 12265,   | 171398, | 3151.5482, |
| 7.887600 |         |            | 7.881719 |         |            | 7.875838 |         |            |
| 12190,   | 170686, | 3156.1927, | 12228,   | 174280, | 3153.8395, | 12266,   | 171492, | 3151.4862, |
| 7.887445 |         |            | 7.881564 |         |            | 7.875683 |         |            |
| 12191,   | 170134, | 3156.1308, | 12229,   | 173648, | 3153.7775, | 12267,   | 171602, | 3151.4243, |
| 7.887290 |         |            | 7.881409 |         |            | 7.875529 |         |            |
| 12192,   | 170258, | 3156.0688, | 12230,   | 173652, | 3153.7156, | 12268,   | 171956, | 3151.3624, |
| 7.887136 |         |            | 7.881255 |         |            | 7.875374 |         |            |
| 12193,   | 171062, | 3156.0069, | 12231,   | 173950, | 3153.6537, | 12269,   | 172440, | 3151.3005, |
| 7.886981 |         |            | 7.881100 |         |            | 7.875219 |         |            |
| 12194,   | 172092, | 3155.9450, | 12232,   | 173954, | 3153.5918, | 12270,   | 172680, | 3151.2385, |
| 7.886826 |         |            | 7.880945 |         |            | 7.875064 |         |            |
| 12195,   | 172866, | 3155.8830, | 12233,   | 173452, | 3153.5298, | 12271,   | 172444, | 3151.1766, |
| 7.886671 |         |            | 7.880790 |         |            | 7.874910 |         |            |
| 12196,   | 173210, | 3155.8211, | 12234,   | 172792, | 3153.4679, | 12272,   | 171896, | 3151.1147, |
| 7.886516 |         |            | 7.880636 |         |            | 7.874755 |         |            |
| 12197,   | 173270, | 3155.7592, | 12235,   | 172516, | 3153.4060, | 12273,   | 171482, | 3151.0527, |
| 7.886362 |         |            | 7.880481 |         |            | 7.874600 |         |            |
| 12198,   | 173166, | 3155.6973, | 12236,   | 172790, | 3153.3440, | 12274,   | 171486, | 3150.9908, |
| 7.886207 |         |            | 7.880326 |         |            | 7.874445 |         |            |
| 12199,   | 172904, | 3155.6353, | 12237,   | 173276, | 3153.2821, | 12275,   | 171824, | 3150.9289, |
| 7.886052 |         |            | 7.880171 |         |            | 7.874291 |         |            |
| 12200,   | 172456, | 3155.5734, | 12238,   | 173510, | 3153.2202, | 12276,   | 172196, | 3150.8670, |
| 7.885897 |         |            | 7.880017 |         |            | 7.874136 |         |            |
| 12201,   | 171934, | 3155.5115, | 12239,   | 173384, | 3153.1583, | 12277,   | 172418, | 3150.8050, |
| 7.885743 |         |            | 7.879862 |         |            | 7.873981 |         |            |
| 12202,   | 171596, | 3155.4496, | 12240,   | 173166, | 3153.0963, | 12278,   | 172570, | 3150.7431, |
| 7.885588 |         |            | 7.879707 |         |            | 7.873826 |         |            |
| 12203,   | 171584, | 3155.3876, | 12241,   | 173138, | 3153.0344, | 12279,   | 172896, | 3150.6812, |
| 7.885433 |         |            | 7.879552 |         |            | 7.873672 |         |            |
| 12204,   | 171818, | 3155.3257, | 12242,   | 173268, | 3152.9725, | 12280,   | 173532, | 3150.6193, |
| 7.885278 |         |            | 7.879398 |         |            | 7.873517 |         |            |
| 12205,   | 172090, | 3155.2638, | 12243,   | 173282, | 3152.9106, | 12281,   | 174450, | 3150.5573, |
| 7.885124 |         |            | 7.879243 |         |            | 7.873362 |         |            |
| 12206,   | 172292, | 3155.2019, | 12244,   | 173034, | 3152.8486, | 12282,   | 175492, | 3150.4954, |
| 7.884969 |         |            | 7.879088 |         |            | 7.873207 |         |            |

|          |         |            |          |         |            |          |         |            |
|----------|---------|------------|----------|---------|------------|----------|---------|------------|
| 12283,   | 176466, | 3150.4335, | 12321,   | 171204, | 3148.0803, | 12359,   | 173188, | 3145.7270, |
| 7.873053 |         |            | 7.867172 |         |            | 7.861291 |         |            |
| 12284,   | 177158, | 3150.3716, | 12322,   | 171142, | 3148.0183, | 12360,   | 173772, | 3145.6651, |
| 7.872898 |         |            | 7.867017 |         |            | 7.861136 |         |            |
| 12285,   | 177350, | 3150.3096, | 12323,   | 171366, | 3147.9564, | 12361,   | 174392, | 3145.6032, |
| 7.872743 |         |            | 7.866862 |         |            | 7.860981 |         |            |
| 12286,   | 176934, | 3150.2477, | 12324,   | 171626, | 3147.8945, | 12362,   | 174900, | 3145.5413, |
| 7.872588 |         |            | 7.866708 |         |            | 7.860827 |         |            |
| 12287,   | 176030, | 3150.1858, | 12325,   | 171748, | 3147.8326, | 12363,   | 175298, | 3145.4793, |
| 7.872434 |         |            | 7.866553 |         |            | 7.860672 |         |            |
| 12288,   | 174984, | 3150.1238, | 12326,   | 171740, | 3147.7706, | 12364,   | 175652, | 3145.4174, |
| 7.872279 |         |            | 7.866398 |         |            | 7.860517 |         |            |
| 12289,   | 174114, | 3150.0619, | 12327,   | 171656, | 3147.7087, | 12365,   | 175928, | 3145.3555, |
| 7.872124 |         |            | 7.866243 |         |            | 7.860362 |         |            |
| 12290,   | 173532, | 3150.0000, | 12328,   | 171452, | 3147.6468, | 12366,   | 175898, | 3145.2935, |
| 7.871969 |         |            | 7.866088 |         |            | 7.860208 |         |            |
| 12291,   | 173150, | 3149.9381, | 12329,   | 170986, | 3147.5848, | 12367,   | 175392, | 3145.2316, |
| 7.871815 |         |            | 7.865934 |         |            | 7.860053 |         |            |
| 12292,   | 172876, | 3149.8761, | 12330,   | 170236, | 3147.5229, | 12368,   | 174592, | 3145.1697, |
| 7.871660 |         |            | 7.865779 |         |            | 7.859898 |         |            |
| 12293,   | 172788, | 3149.8142, | 12331,   | 169450, | 3147.4610, | 12369,   | 174000, | 3145.1078, |
| 7.871505 |         |            | 7.865624 |         |            | 7.859743 |         |            |
| 12294,   | 172978, | 3149.7523, | 12332,   | 169008, | 3147.3991, | 12370,   | 174056, | 3145.0458, |
| 7.871350 |         |            | 7.865469 |         |            | 7.859589 |         |            |
| 12295,   | 173354, | 3149.6904, | 12333,   | 169166, | 3147.3371, | 12371,   | 174670, | 3144.9839, |
| 7.871195 |         |            | 7.865315 |         |            | 7.859434 |         |            |
| 12296,   | 173580, | 3149.6284, | 12334,   | 169874, | 3147.2752, | 12372,   | 175304, | 3144.9220, |
| 7.871041 |         |            | 7.865160 |         |            | 7.859279 |         |            |
| 12297,   | 173384, | 3149.5665, | 12335,   | 170888, | 3147.2133, | 12373,   | 175428, | 3144.8601, |
| 7.870886 |         |            | 7.865005 |         |            | 7.859124 |         |            |
| 12298,   | 172840, | 3149.5046, | 12336,   | 171960, | 3147.1514, | 12374,   | 175024, | 3144.7981, |
| 7.870731 |         |            | 7.864850 |         |            | 7.858970 |         |            |
| 12299,   | 172372, | 3149.4427, | 12337,   | 172968, | 3147.0894, | 12375,   | 174566, | 3144.7362, |
| 7.870576 |         |            | 7.864696 |         |            | 7.858815 |         |            |
| 12300,   | 172316, | 3149.3807, | 12338,   | 173832, | 3147.0275, | 12376,   | 174546, | 3144.6743, |
| 7.870422 |         |            | 7.864541 |         |            | 7.858660 |         |            |
| 12301,   | 172620, | 3149.3188, | 12339,   | 174466, | 3146.9656, | 12377,   | 174996, | 3144.6124, |
| 7.870267 |         |            | 7.864386 |         |            | 7.858505 |         |            |
| 12302,   | 172890, | 3149.2569, | 12340,   | 174810, | 3146.9036, | 12378,   | 175518, | 3144.5504, |
| 7.870112 |         |            | 7.864231 |         |            | 7.858351 |         |            |
| 12303,   | 172802, | 3149.1949, | 12341,   | 174970, | 3146.8417, | 12379,   | 175678, | 3144.4885, |
| 7.869957 |         |            | 7.864077 |         |            | 7.858196 |         |            |
| 12304,   | 172476, | 3149.1330, | 12342,   | 175170, | 3146.7798, | 12380,   | 175366, | 3144.4266, |
| 7.869803 |         |            | 7.863922 |         |            | 7.858041 |         |            |
| 12305,   | 172340, | 3149.0711, | 12343,   | 175562, | 3146.7179, | 12381,   | 174752, | 3144.3646, |
| 7.869648 |         |            | 7.863767 |         |            | 7.857886 |         |            |
| 12306,   | 172658, | 3149.0092, | 12344,   | 176020, | 3146.6559, | 12382,   | 174038, | 3144.3027, |
| 7.869493 |         |            | 7.863612 |         |            | 7.857732 |         |            |
| 12307,   | 173234, | 3148.9472, | 12345,   | 176238, | 3146.5940, | 12383,   | 173312, | 3144.2408, |
| 7.869338 |         |            | 7.863458 |         |            | 7.857577 |         |            |
| 12308,   | 173586, | 3148.8853, | 12346,   | 176032, | 3146.5321, | 12384,   | 172656, | 3144.1789, |
| 7.869184 |         |            | 7.863303 |         |            | 7.857422 |         |            |
| 12309,   | 173416, | 3148.8234, | 12347,   | 175532, | 3146.4702, | 12385,   | 172266, | 3144.1169, |
| 7.869029 |         |            | 7.863148 |         |            | 7.857267 |         |            |
| 12310,   | 172912, | 3148.7615, | 12348,   | 175078, | 3146.4082, | 12386,   | 172340, | 3144.0550, |
| 7.868874 |         |            | 7.862993 |         |            | 7.857113 |         |            |
| 12311,   | 172536, | 3148.6995, | 12349,   | 174860, | 3146.3463, | 12387,   | 172812, | 3143.9931, |
| 7.868719 |         |            | 7.862839 |         |            | 7.856958 |         |            |
| 12312,   | 172616, | 3148.6376, | 12350,   | 174742, | 3146.2844, | 12388,   | 173302, | 3143.9312, |
| 7.868565 |         |            | 7.862684 |         |            | 7.856803 |         |            |
| 12313,   | 173108, | 3148.5757, | 12351,   | 174430, | 3146.2225, | 12389,   | 173420, | 3143.8692, |
| 7.868410 |         |            | 7.862529 |         |            | 7.856648 |         |            |
| 12314,   | 173702, | 3148.5137, | 12352,   | 173810, | 3146.1605, | 12390,   | 173138, | 3143.8073, |
| 7.868255 |         |            | 7.862374 |         |            | 7.856494 |         |            |
| 12315,   | 174090, | 3148.4518, | 12353,   | 173072, | 3146.0986, | 12391,   | 172826, | 3143.7454, |
| 7.868100 |         |            | 7.862220 |         |            | 7.856339 |         |            |
| 12316,   | 174148, | 3148.3899, | 12354,   | 172538, | 3146.0367, | 12392,   | 172878, | 3143.6834, |
| 7.867946 |         |            | 7.862065 |         |            | 7.856184 |         |            |
| 12317,   | 173856, | 3148.3280, | 12355,   | 172342, | 3145.9747, | 12393,   | 173268, | 3143.6215, |
| 7.867791 |         |            | 7.861910 |         |            | 7.856029 |         |            |
| 12318,   | 173254, | 3148.2660, | 12356,   | 172394, | 3145.9128, | 12394,   | 173558, | 3143.5596, |
| 7.867636 |         |            | 7.861755 |         |            | 7.855874 |         |            |
| 12319,   | 172452, | 3148.2041, | 12357,   | 172540, | 3145.8509, | 12395,   | 173326, | 3143.4977, |
| 7.867481 |         |            | 7.861601 |         |            | 7.855720 |         |            |
| 12320,   | 171684, | 3148.1422, | 12358,   | 172780, | 3145.7890, | 12396,   | 172588, | 3143.4357, |
| 7.867327 |         |            | 7.861446 |         |            | 7.855565 |         |            |



|          |         |            |          |         |            |          |         |            |
|----------|---------|------------|----------|---------|------------|----------|---------|------------|
| 12397,   | 171784, | 3143.3738, | 12435,   | 176252, | 3141.0206, | 12473,   | 172370, | 3138.6674, |
| 7.855410 |         |            | 7.849529 |         |            | 7.843649 |         |            |
| 12398,   | 171382, | 3143.3119, | 12436,   | 176662, | 3140.9587, | 12474,   | 172078, | 3138.6054, |
| 7.855255 |         |            | 7.849375 |         |            | 7.843494 |         |            |
| 12399,   | 171490, | 3143.2500, | 12437,   | 176866, | 3140.8967, | 12475,   | 172006, | 3138.5435, |
| 7.855101 |         |            | 7.849220 |         |            | 7.843339 |         |            |
| 12400,   | 171882, | 3143.1880, | 12438,   | 176608, | 3140.8348, | 12476,   | 171922, | 3138.4816, |
| 7.854946 |         |            | 7.849065 |         |            | 7.843184 |         |            |
| 12401,   | 172306, | 3143.1261, | 12439,   | 176016, | 3140.7729, | 12477,   | 171758, | 3138.4197, |
| 7.854791 |         |            | 7.848910 |         |            | 7.843030 |         |            |
| 12402,   | 172734, | 3143.0642, | 12440,   | 175452, | 3140.7110, | 12478,   | 171658, | 3138.3577, |
| 7.854636 |         |            | 7.848756 |         |            | 7.842875 |         |            |
| 12403,   | 173288, | 3143.0023, | 12441,   | 175136, | 3140.6490, | 12479,   | 171790, | 3138.2958, |
| 7.854482 |         |            | 7.848601 |         |            | 7.842720 |         |            |
| 12404,   | 174006, | 3142.9403, | 12442,   | 174922, | 3140.5871, | 12480,   | 172146, | 3138.2339, |
| 7.854327 |         |            | 7.848446 |         |            | 7.842565 |         |            |
| 12405,   | 174736, | 3142.8784, | 12443,   | 174526, | 3140.5252, | 12481,   | 172594, | 3138.1720, |
| 7.854172 |         |            | 7.848291 |         |            | 7.842411 |         |            |
| 12406,   | 175260, | 3142.8165, | 12444,   | 173894, | 3140.4632, | 12482,   | 173048, | 3138.1100, |
| 7.854017 |         |            | 7.848137 |         |            | 7.842256 |         |            |
| 12407,   | 175446, | 3142.7545, | 12445,   | 173322, | 3140.4013, | 12483,   | 173558, | 3138.0481, |
| 7.853863 |         |            | 7.847982 |         |            | 7.842101 |         |            |
| 12408,   | 175350, | 3142.6926, | 12446,   | 173152, | 3140.3394, | 12484,   | 174146, | 3137.9862, |
| 7.853708 |         |            | 7.847827 |         |            | 7.841946 |         |            |
| 12409,   | 175084, | 3142.6307, | 12447,   | 173400, | 3140.2775, | 12485,   | 174654, | 3137.9242, |
| 7.853553 |         |            | 7.847672 |         |            | 7.841792 |         |            |
| 12410,   | 174764, | 3142.5688, | 12448,   | 173742, | 3140.2155, | 12486,   | 174838, | 3137.8623, |
| 7.853398 |         |            | 7.847518 |         |            | 7.841637 |         |            |
| 12411,   | 174492, | 3142.5068, | 12449,   | 173854, | 3140.1536, | 12487,   | 174622, | 3137.8004, |
| 7.853244 |         |            | 7.847363 |         |            | 7.841482 |         |            |
| 12412,   | 174326, | 3142.4449, | 12450,   | 173718, | 3140.0917, | 12488,   | 174246, | 3137.7385, |
| 7.853089 |         |            | 7.847208 |         |            | 7.841327 |         |            |
| 12413,   | 174226, | 3142.3830, | 12451,   | 173558, | 3140.0298, | 12489,   | 174066, | 3137.6765, |
| 7.852934 |         |            | 7.847053 |         |            | 7.841172 |         |            |
| 12414,   | 173994, | 3142.3211, | 12452,   | 173496, | 3139.9678, | 12490,   | 174232, | 3137.6146, |
| 7.852779 |         |            | 7.846899 |         |            | 7.841018 |         |            |
| 12415,   | 173428, | 3142.2591, | 12453,   | 173414, | 3139.9059, | 12491,   | 174582, | 3137.5527, |
| 7.852625 |         |            | 7.846744 |         |            | 7.840863 |         |            |
| 12416,   | 172602, | 3142.1972, | 12454,   | 173122, | 3139.8440, | 12492,   | 174872, | 3137.4908, |
| 7.852470 |         |            | 7.846589 |         |            | 7.840708 |         |            |
| 12417,   | 171950, | 3142.1353, | 12455,   | 172698, | 3139.7821, | 12493,   | 175042, | 3137.4288, |
| 7.852315 |         |            | 7.846434 |         |            | 7.840553 |         |            |
| 12418,   | 172036, | 3142.0733, | 12456,   | 172484, | 3139.7201, | 12494,   | 175238, | 3137.3669, |
| 7.852160 |         |            | 7.846279 |         |            | 7.840399 |         |            |
| 12419,   | 173078, | 3142.0114, | 12457,   | 172730, | 3139.6582, | 12495,   | 175534, | 3137.3050, |
| 7.852006 |         |            | 7.846125 |         |            | 7.840244 |         |            |
| 12420,   | 174708, | 3141.9495, | 12458,   | 173292, | 3139.5963, | 12496,   | 175766, | 3137.2430, |
| 7.851851 |         |            | 7.845970 |         |            | 7.840089 |         |            |
| 12421,   | 176226, | 3141.8876, | 12459,   | 173748, | 3139.5343, | 12497,   | 175724, | 3137.1811, |
| 7.851696 |         |            | 7.845815 |         |            | 7.839934 |         |            |
| 12422,   | 177132, | 3141.8256, | 12460,   | 173838, | 3139.4724, | 12498,   | 175426, | 3137.1192, |
| 7.851541 |         |            | 7.845660 |         |            | 7.839780 |         |            |
| 12423,   | 177458, | 3141.7637, | 12461,   | 173746, | 3139.4105, | 12499,   | 175240, | 3137.0573, |
| 7.851387 |         |            | 7.845506 |         |            | 7.839625 |         |            |
| 12424,   | 177590, | 3141.7018, | 12462,   | 173894, | 3139.3486, | 12500,   | 175498, | 3136.9953, |
| 7.851232 |         |            | 7.845351 |         |            | 7.839470 |         |            |
| 12425,   | 177806, | 3141.6399, | 12463,   | 174454, | 3139.2866, | 12501,   | 176144, | 3136.9334, |
| 7.851077 |         |            | 7.845196 |         |            | 7.839315 |         |            |
| 12426,   | 178048, | 3141.5779, | 12464,   | 175148, | 3139.2247, | 12502,   | 176718, | 3136.8715, |
| 7.850922 |         |            | 7.845041 |         |            | 7.839161 |         |            |
| 12427,   | 178062, | 3141.5160, | 12465,   | 175510, | 3139.1628, | 12503,   | 176776, | 3136.8096, |
| 7.850767 |         |            | 7.844887 |         |            | 7.839006 |         |            |
| 12428,   | 177762, | 3141.4541, | 12466,   | 175364, | 3139.1009, | 12504,   | 176314, | 3136.7476, |
| 7.850613 |         |            | 7.844732 |         |            | 7.838851 |         |            |
| 12429,   | 177304, | 3141.3922, | 12467,   | 174952, | 3139.0389, | 12505,   | 175700, | 3136.6857, |
| 7.850458 |         |            | 7.844577 |         |            | 7.838696 |         |            |
| 12430,   | 176904, | 3141.3302, | 12468,   | 174626, | 3138.9770, | 12506,   | 175242, | 3136.6238, |
| 7.850303 |         |            | 7.844422 |         |            | 7.838542 |         |            |
| 12431,   | 176602, | 3141.2683, | 12469,   | 174458, | 3138.9151, | 12507,   | 174876, | 3136.5619, |
| 7.850148 |         |            | 7.844268 |         |            | 7.838387 |         |            |
| 12432,   | 176320, | 3141.2064, | 12470,   | 174214, | 3138.8531, | 12508,   | 174354, | 3136.4999, |
| 7.849994 |         |            | 7.844113 |         |            | 7.838232 |         |            |
| 12433,   | 176066, | 3141.1444, | 12471,   | 173690, | 3138.7912, | 12509,   | 173676, | 3136.4380, |
| 7.849839 |         |            | 7.843958 |         |            | 7.838077 |         |            |
| 12434,   | 176004, | 3141.0825, | 12472,   | 172974, | 3138.7293, | 12510,   | 173206, | 3136.3761, |
| 7.849684 |         |            | 7.843803 |         |            | 7.837923 |         |            |

|          |         |            |          |         |            |          |         |            |
|----------|---------|------------|----------|---------|------------|----------|---------|------------|
| 12511,   | 173374, | 3136.3141, | 12549,   | 174642, | 3133.9609, | 12587,   | 177400, | 3131.6077, |
| 7.837768 |         |            | 7.831887 |         |            | 7.826006 |         |            |
| 12512,   | 174150, | 3136.2522, | 12550,   | 174318, | 3133.8990, | 12588,   | 177946, | 3131.5458, |
| 7.837613 |         |            | 7.831732 |         |            | 7.825851 |         |            |
| 12513,   | 174986, | 3136.1903, | 12551,   | 173950, | 3133.8371, | 12589,   | 178192, | 3131.4838, |
| 7.837458 |         |            | 7.831578 |         |            | 7.825697 |         |            |
| 12514,   | 175278, | 3136.1284, | 12552,   | 173614, | 3133.7751, | 12590,   | 177982, | 3131.4219, |
| 7.837304 |         |            | 7.831423 |         |            | 7.825542 |         |            |
| 12515,   | 174890, | 3136.0664, | 12553,   | 173454, | 3133.7132, | 12591,   | 177626, | 3131.3600, |
| 7.837149 |         |            | 7.831268 |         |            | 7.825387 |         |            |
| 12516,   | 174196, | 3136.0045, | 12554,   | 173578, | 3133.6513, | 12592,   | 177544, | 3131.2981, |
| 7.836994 |         |            | 7.831113 |         |            | 7.825232 |         |            |
| 12517,   | 173668, | 3135.9426, | 12555,   | 173890, | 3133.5894, | 12593,   | 177796, | 3131.2361, |
| 7.836839 |         |            | 7.830958 |         |            | 7.825078 |         |            |
| 12518,   | 173454, | 3135.8807, | 12556,   | 174098, | 3133.5274, | 12594,   | 177994, | 3131.1742, |
| 7.836685 |         |            | 7.830804 |         |            | 7.824923 |         |            |
| 12519,   | 173380, | 3135.8187, | 12557,   | 173956, | 3133.4655, | 12595,   | 177764, | 3131.1123, |
| 7.836530 |         |            | 7.830649 |         |            | 7.824768 |         |            |
| 12520,   | 173290, | 3135.7568, | 12558,   | 173548, | 3133.4036, | 12596,   | 177180, | 3131.0504, |
| 7.836375 |         |            | 7.830494 |         |            | 7.824613 |         |            |
| 12521,   | 173278, | 3135.6949, | 12559,   | 173210, | 3133.3417, | 12597,   | 176752, | 3130.9884, |
| 7.836220 |         |            | 7.830339 |         |            | 7.824459 |         |            |
| 12522,   | 173570, | 3135.6330, | 12560,   | 173234, | 3133.2797, | 12598,   | 176848, | 3130.9265, |
| 7.836065 |         |            | 7.830185 |         |            | 7.824304 |         |            |
| 12523,   | 174246, | 3135.5710, | 12561,   | 173594, | 3133.2178, | 12599,   | 177296, | 3130.8646, |
| 7.835911 |         |            | 7.830030 |         |            | 7.824149 |         |            |
| 12524,   | 175120, | 3135.5091, | 12562,   | 174012, | 3133.1559, | 12600,   | 177556, | 3130.8027, |
| 7.835756 |         |            | 7.829875 |         |            | 7.823994 |         |            |
| 12525,   | 175952, | 3135.4472, | 12563,   | 174276, | 3133.0939, | 12601,   | 177294, | 3130.7407, |
| 7.835601 |         |            | 7.829720 |         |            | 7.823840 |         |            |
| 12526,   | 176632, | 3135.3852, | 12564,   | 174462, | 3133.0320, | 12602,   | 176754, | 3130.6788, |
| 7.835446 |         |            | 7.829566 |         |            | 7.823685 |         |            |
| 12527,   | 177178, | 3135.3233, | 12565,   | 174764, | 3132.9701, | 12603,   | 176448, | 3130.6169, |
| 7.835292 |         |            | 7.829411 |         |            | 7.823530 |         |            |
| 12528,   | 177522, | 3135.2614, | 12566,   | 175220, | 3132.9082, | 12604,   | 176608, | 3130.5549, |
| 7.835137 |         |            | 7.829256 |         |            | 7.823375 |         |            |
| 12529,   | 177484, | 3135.1995, | 12567,   | 175596, | 3132.8462, | 12605,   | 176968, | 3130.4930, |
| 7.834982 |         |            | 7.829101 |         |            | 7.823221 |         |            |
| 12530,   | 176966, | 3135.1375, | 12568,   | 175620, | 3132.7843, | 12606,   | 177136, | 3130.4311, |
| 7.834827 |         |            | 7.828947 |         |            | 7.823066 |         |            |
| 12531,   | 176162, | 3135.0756, | 12569,   | 175270, | 3132.7224, | 12607,   | 177058, | 3130.3692, |
| 7.834673 |         |            | 7.828792 |         |            | 7.822911 |         |            |
| 12532,   | 175464, | 3135.0137, | 12570,   | 174792, | 3132.6605, | 12608,   | 177060, | 3130.3072, |
| 7.834518 |         |            | 7.828637 |         |            | 7.822756 |         |            |
| 12533,   | 175102, | 3134.9518, | 12571,   | 174446, | 3132.5985, | 12609,   | 177374, | 3130.2453, |
| 7.834363 |         |            | 7.828482 |         |            | 7.822602 |         |            |
| 12534,   | 174894, | 3134.8898, | 12572,   | 174334, | 3132.5366, | 12610,   | 177788, | 3130.1834, |
| 7.834208 |         |            | 7.828328 |         |            | 7.822447 |         |            |
| 12535,   | 174432, | 3134.8279, | 12573,   | 174434, | 3132.4747, | 12611,   | 177810, | 3130.1215, |
| 7.834054 |         |            | 7.828173 |         |            | 7.822292 |         |            |
| 12536,   | 173534, | 3134.7660, | 12574,   | 174796, | 3132.4128, | 12612,   | 177232, | 3130.0595, |
| 7.833899 |         |            | 7.828018 |         |            | 7.822137 |         |            |
| 12537,   | 172482, | 3134.7040, | 12575,   | 175522, | 3132.3508, | 12613,   | 176452, | 3129.9976, |
| 7.833744 |         |            | 7.827863 |         |            | 7.821983 |         |            |
| 12538,   | 171748, | 3134.6421, | 12576,   | 176582, | 3132.2889, | 12614,   | 176106, | 3129.9357, |
| 7.833589 |         |            | 7.827709 |         |            | 7.821828 |         |            |
| 12539,   | 171564, | 3134.5802, | 12577,   | 177654, | 3132.2270, | 12615,   | 176452, | 3129.8737, |
| 7.833435 |         |            | 7.827554 |         |            | 7.821673 |         |            |
| 12540,   | 171704, | 3134.5183, | 12578,   | 178292, | 3132.1650, | 12616,   | 177082, | 3129.8118, |
| 7.833280 |         |            | 7.827399 |         |            | 7.821518 |         |            |
| 12541,   | 171804, | 3134.4563, | 12579,   | 178300, | 3132.1031, | 12617,   | 177362, | 3129.7499, |
| 7.833125 |         |            | 7.827244 |         |            | 7.821364 |         |            |
| 12542,   | 171756, | 3134.3944, | 12580,   | 177888, | 3132.0412, | 12618,   | 177044, | 3129.6880, |
| 7.832970 |         |            | 7.827090 |         |            | 7.821209 |         |            |
| 12543,   | 171820, | 3134.3325, | 12581,   | 177490, | 3131.9793, | 12619,   | 176450, | 3129.6260, |
| 7.832816 |         |            | 7.826935 |         |            | 7.821054 |         |            |
| 12544,   | 172296, | 3134.2706, | 12582,   | 177310, | 3131.9173, | 12620,   | 176088, | 3129.5641, |
| 7.832661 |         |            | 7.826780 |         |            | 7.820899 |         |            |
| 12545,   | 173172, | 3134.2086, | 12583,   | 177246, | 3131.8554, | 12621,   | 176132, | 3129.5022, |
| 7.832506 |         |            | 7.826625 |         |            | 7.820744 |         |            |
| 12546,   | 174094, | 3134.1467, | 12584,   | 177094, | 3131.7935, | 12622,   | 176372, | 3129.4403, |
| 7.832351 |         |            | 7.826471 |         |            | 7.820590 |         |            |
| 12547,   | 174684, | 3134.0848, | 12585,   | 176910, | 3131.7316, | 12623,   | 176608, | 3129.3783, |
| 7.832197 |         |            | 7.826316 |         |            | 7.820435 |         |            |
| 12548,   | 174822, | 3134.0229, | 12586,   | 176970, | 3131.6696, | 12624,   | 176960, | 3129.3164, |
| 7.832042 |         |            | 7.826161 |         |            | 7.820280 |         |            |

|          |         |            |          |         |            |          |         |            |
|----------|---------|------------|----------|---------|------------|----------|---------|------------|
| 12625,   | 177716, | 3129.2545, | 12663,   | 176852, | 3126.9013, | 12701,   | 175882, | 3124.5480, |
| 7.820125 |         |            | 7.814245 |         |            | 7.808364 |         |            |
| 12626,   | 178886, | 3129.1926, | 12664,   | 177032, | 3126.8393, | 12702,   | 175794, | 3124.4861, |
| 7.819971 |         |            | 7.814090 |         |            | 7.808209 |         |            |
| 12627,   | 180004, | 3129.1306, | 12665,   | 176832, | 3126.7774, | 12703,   | 175526, | 3124.4242, |
| 7.819816 |         |            | 7.813935 |         |            | 7.808054 |         |            |
| 12628,   | 180478, | 3129.0687, | 12666,   | 176374, | 3126.7155, | 12704,   | 175094, | 3124.3623, |
| 7.819661 |         |            | 7.813780 |         |            | 7.807900 |         |            |
| 12629,   | 180056, | 3129.0068, | 12667,   | 175842, | 3126.6535, | 12705,   | 174848, | 3124.3003, |
| 7.819506 |         |            | 7.813626 |         |            | 7.807745 |         |            |
| 12630,   | 179064, | 3128.9448, | 12668,   | 175420, | 3126.5916, | 12706,   | 175070, | 3124.2384, |
| 7.819352 |         |            | 7.813471 |         |            | 7.807590 |         |            |
| 12631,   | 178076, | 3128.8829, | 12669,   | 175216, | 3126.5297, | 12707,   | 175688, | 3124.1765, |
| 7.819197 |         |            | 7.813316 |         |            | 7.807435 |         |            |
| 12632,   | 177418, | 3128.8210, | 12670,   | 175300, | 3126.4678, | 12708,   | 176328, | 3124.1145, |
| 7.819042 |         |            | 7.813161 |         |            | 7.807281 |         |            |
| 12633,   | 177060, | 3128.7591, | 12671,   | 175688, | 3126.4058, | 12709,   | 176678, | 3124.0526, |
| 7.818887 |         |            | 7.813007 |         |            | 7.807126 |         |            |
| 12634,   | 176796, | 3128.6971, | 12672,   | 176332, | 3126.3439, | 12710,   | 176710, | 3123.9907, |
| 7.818733 |         |            | 7.812852 |         |            | 7.806971 |         |            |
| 12635,   | 176546, | 3128.6352, | 12673,   | 177068, | 3126.2820, | 12711,   | 176574, | 3123.9288, |
| 7.818578 |         |            | 7.812697 |         |            | 7.806816 |         |            |
| 12636,   | 176358, | 3128.5733, | 12674,   | 177658, | 3126.2201, | 12712,   | 176354, | 3123.8668, |
| 7.818423 |         |            | 7.812542 |         |            | 7.806662 |         |            |
| 12637,   | 176210, | 3128.5114, | 12675,   | 177914, | 3126.1581, | 12713,   | 176004, | 3123.8049, |
| 7.818268 |         |            | 7.812388 |         |            | 7.806507 |         |            |
| 12638,   | 175952, | 3128.4494, | 12676,   | 177856, | 3126.0962, | 12714,   | 175552, | 3123.7430, |
| 7.818114 |         |            | 7.812233 |         |            | 7.806352 |         |            |
| 12639,   | 175432, | 3128.3875, | 12677,   | 177664, | 3126.0343, | 12715,   | 175238, | 3123.6811, |
| 7.817959 |         |            | 7.812078 |         |            | 7.806197 |         |            |
| 12640,   | 174724, | 3128.3256, | 12678,   | 177458, | 3125.9724, | 12716,   | 175332, | 3123.6191, |
| 7.817804 |         |            | 7.811923 |         |            | 7.806043 |         |            |
| 12641,   | 174120, | 3128.2636, | 12679,   | 177134, | 3125.9104, | 12717,   | 175816, | 3123.5572, |
| 7.817649 |         |            | 7.811769 |         |            | 7.805888 |         |            |
| 12642,   | 173888, | 3128.2017, | 12680,   | 176440, | 3125.8485, | 12718,   | 176282, | 3123.4953, |
| 7.817495 |         |            | 7.811614 |         |            | 7.805733 |         |            |
| 12643,   | 174050, | 3128.1398, | 12681,   | 175324, | 3125.7866, | 12719,   | 176308, | 3123.4333, |
| 7.817340 |         |            | 7.811459 |         |            | 7.805578 |         |            |
| 12644,   | 174384, | 3128.0779, | 12682,   | 174142, | 3125.7246, | 12720,   | 175878, | 3123.3714, |
| 7.817185 |         |            | 7.811304 |         |            | 7.805423 |         |            |
| 12645,   | 174672, | 3128.0159, | 12683,   | 173504, | 3125.6627, | 12721,   | 175472, | 3123.3095, |
| 7.817030 |         |            | 7.811150 |         |            | 7.805269 |         |            |
| 12646,   | 174842, | 3127.9540, | 12684,   | 173782, | 3125.6008, | 12722,   | 175584, | 3123.2476, |
| 7.816876 |         |            | 7.810995 |         |            | 7.805114 |         |            |
| 12647,   | 174922, | 3127.8921, | 12685,   | 174788, | 3125.5389, | 12723,   | 176248, | 3123.1856, |
| 7.816721 |         |            | 7.810840 |         |            | 7.804959 |         |            |
| 12648,   | 174890, | 3127.8302, | 12686,   | 175888, | 3125.4769, | 12724,   | 176982, | 3123.1237, |
| 7.816566 |         |            | 7.810685 |         |            | 7.804804 |         |            |
| 12649,   | 174676, | 3127.7682, | 12687,   | 176506, | 3125.4150, | 12725,   | 177270, | 3123.0618, |
| 7.816411 |         |            | 7.810530 |         |            | 7.804650 |         |            |
| 12650,   | 174294, | 3127.7063, | 12688,   | 176552, | 3125.3531, | 12726,   | 177028, | 3122.9999, |
| 7.816257 |         |            | 7.810376 |         |            | 7.804495 |         |            |
| 12651,   | 173970, | 3127.6444, | 12689,   | 176368, | 3125.2912, | 12727,   | 176598, | 3122.9379, |
| 7.816102 |         |            | 7.810221 |         |            | 7.804340 |         |            |
| 12652,   | 174020, | 3127.5825, | 12690,   | 176358, | 3125.2292, | 12728,   | 176332, | 3122.8760, |
| 7.815947 |         |            | 7.810066 |         |            | 7.804185 |         |            |
| 12653,   | 174556, | 3127.5205, | 12691,   | 176672, | 3125.1673, | 12729,   | 176238, | 3122.8141, |
| 7.815792 |         |            | 7.809911 |         |            | 7.804031 |         |            |
| 12654,   | 175352, | 3127.4586, | 12692,   | 177204, | 3125.1054, | 12730,   | 176114, | 3122.7522, |
| 7.815637 |         |            | 7.809757 |         |            | 7.803876 |         |            |
| 12655,   | 175968, | 3127.3967, | 12693,   | 177800, | 3125.0434, | 12731,   | 175936, | 3122.6902, |
| 7.815483 |         |            | 7.809602 |         |            | 7.803721 |         |            |
| 12656,   | 176074, | 3127.3347, | 12694,   | 178366, | 3124.9815, | 12732,   | 175982, | 3122.6283, |
| 7.815328 |         |            | 7.809447 |         |            | 7.803566 |         |            |
| 12657,   | 175708, | 3127.2728, | 12695,   | 178794, | 3124.9196, | 12733,   | 176542, | 3122.5664, |
| 7.815173 |         |            | 7.809292 |         |            | 7.803412 |         |            |
| 12658,   | 175200, | 3127.2109, | 12696,   | 178878, | 3124.8577, | 12734,   | 177534, | 3122.5044, |
| 7.815018 |         |            | 7.809138 |         |            | 7.803257 |         |            |
| 12659,   | 174942, | 3127.1490, | 12697,   | 178444, | 3124.7957, | 12735,   | 178488, | 3122.4425, |
| 7.814864 |         |            | 7.808983 |         |            | 7.803102 |         |            |
| 12660,   | 175120, | 3127.0870, | 12698,   | 177582, | 3124.7338, | 12736,   | 178936, | 3122.3806, |
| 7.814709 |         |            | 7.808828 |         |            | 7.802947 |         |            |
| 12661,   | 175666, | 3127.0251, | 12699,   | 176662, | 3124.6719, | 12737,   | 178852, | 3122.3187, |
| 7.814554 |         |            | 7.808673 |         |            | 7.802793 |         |            |
| 12662,   | 176336, | 3126.9632, | 12700,   | 176072, | 3124.6100, | 12738,   | 178616, | 3122.2567, |
| 7.814399 |         |            | 7.808519 |         |            | 7.802638 |         |            |

|          |         |            |          |         |            |          |         |            |
|----------|---------|------------|----------|---------|------------|----------|---------|------------|
| 12739,   | 178602, | 3122.1948, | 12777,   | 176394, | 3119.8416, | 12815,   | 179072, | 3117.4884, |
| 7.802483 |         |            | 7.796602 |         |            | 7.790721 |         |            |
| 12740,   | 178826, | 3122.1329, | 12778,   | 176156, | 3119.7797, | 12816,   | 178754, | 3117.4264, |
| 7.802328 |         |            | 7.796448 |         |            | 7.790567 |         |            |
| 12741,   | 179012, | 3122.0710, | 12779,   | 175774, | 3119.7177, | 12817,   | 178164, | 3117.3645, |
| 7.802174 |         |            | 7.796293 |         |            | 7.790412 |         |            |
| 12742,   | 178912, | 3122.0090, | 12780,   | 175338, | 3119.6558, | 12818,   | 177448, | 3117.3026, |
| 7.802019 |         |            | 7.796138 |         |            | 7.790257 |         |            |
| 12743,   | 178538, | 3121.9471, | 12781,   | 175174, | 3119.5939, | 12819,   | 176818, | 3117.2407, |
| 7.801864 |         |            | 7.795983 |         |            | 7.790102 |         |            |
| 12744,   | 178056, | 3121.8852, | 12782,   | 175476, | 3119.5320, | 12820,   | 176366, | 3117.1787, |
| 7.801709 |         |            | 7.795828 |         |            | 7.789948 |         |            |
| 12745,   | 177588, | 3121.8233, | 12783,   | 176062, | 3119.4700, | 12821,   | 176030, | 3117.1168, |
| 7.801555 |         |            | 7.795674 |         |            | 7.789793 |         |            |
| 12746,   | 177146, | 3121.7613, | 12784,   | 176504, | 3119.4081, | 12822,   | 175716, | 3117.0549, |
| 7.801400 |         |            | 7.795519 |         |            | 7.789638 |         |            |
| 12747,   | 176794, | 3121.6994, | 12785,   | 176570, | 3119.3462, | 12823,   | 175490, | 3116.9930, |
| 7.801245 |         |            | 7.795364 |         |            | 7.789483 |         |            |
| 12748,   | 176684, | 3121.6375, | 12786,   | 176492, | 3119.2842, | 12824,   | 175490, | 3116.9310, |
| 7.801090 |         |            | 7.795209 |         |            | 7.789329 |         |            |
| 12749,   | 176942, | 3121.5755, | 12787,   | 176734, | 3119.2223, | 12825,   | 175778, | 3116.8691, |
| 7.800935 |         |            | 7.795055 |         |            | 7.789174 |         |            |
| 12750,   | 177422, | 3121.5136, | 12788,   | 177506, | 3119.1604, | 12826,   | 176194, | 3116.8072, |
| 7.800781 |         |            | 7.794900 |         |            | 7.789019 |         |            |
| 12751,   | 177800, | 3121.4517, | 12789,   | 178522, | 3119.0985, | 12827,   | 176486, | 3116.7452, |
| 7.800626 |         |            | 7.794745 |         |            | 7.788864 |         |            |
| 12752,   | 177854, | 3121.3898, | 12790,   | 179258, | 3119.0365, | 12828,   | 176542, | 3116.6833, |
| 7.800471 |         |            | 7.794590 |         |            | 7.788710 |         |            |
| 12753,   | 177726, | 3121.3278, | 12791,   | 179440, | 3118.9746, | 12829,   | 176460, | 3116.6214, |
| 7.800316 |         |            | 7.794436 |         |            | 7.788555 |         |            |
| 12754,   | 177772, | 3121.2659, | 12792,   | 179228, | 3118.9127, | 12830,   | 176410, | 3116.5595, |
| 7.800162 |         |            | 7.794281 |         |            | 7.788400 |         |            |
| 12755,   | 178146, | 3121.2040, | 12793,   | 178946, | 3118.8508, | 12831,   | 176382, | 3116.4975, |
| 7.800007 |         |            | 7.794126 |         |            | 7.788245 |         |            |
| 12756,   | 178570, | 3121.1421, | 12794,   | 178718, | 3118.7888, | 12832,   | 176244, | 3116.4356, |
| 7.799852 |         |            | 7.793971 |         |            | 7.788091 |         |            |
| 12757,   | 178598, | 3121.0801, | 12795,   | 178422, | 3118.7269, | 12833,   | 175950, | 3116.3737, |
| 7.799697 |         |            | 7.793817 |         |            | 7.787936 |         |            |
| 12758,   | 178066, | 3121.0182, | 12796,   | 177932, | 3118.6650, | 12834,   | 175708, | 3116.3118, |
| 7.799543 |         |            | 7.793662 |         |            | 7.787781 |         |            |
| 12759,   | 177310, | 3120.9563, | 12797,   | 177400, | 3118.6031, | 12835,   | 175842, | 3116.2498, |
| 7.799388 |         |            | 7.793507 |         |            | 7.787626 |         |            |
| 12760,   | 176804, | 3120.8943, | 12798,   | 177130, | 3118.5411, | 12836,   | 176438, | 3116.1879, |
| 7.799233 |         |            | 7.793352 |         |            | 7.787472 |         |            |
| 12761,   | 176704, | 3120.8324, | 12799,   | 177244, | 3118.4792, | 12837,   | 177188, | 3116.1260, |
| 7.799078 |         |            | 7.793198 |         |            | 7.787317 |         |            |
| 12762,   | 176728, | 3120.7705, | 12800,   | 177506, | 3118.4173, | 12838,   | 177628, | 3116.0640, |
| 7.798924 |         |            | 7.793043 |         |            | 7.787162 |         |            |
| 12763,   | 176512, | 3120.7086, | 12801,   | 177542, | 3118.3553, | 12839,   | 177528, | 3116.0021, |
| 7.798769 |         |            | 7.792888 |         |            | 7.787007 |         |            |
| 12764,   | 176078, | 3120.6466, | 12802,   | 177242, | 3118.2934, | 12840,   | 177072, | 3115.9402, |
| 7.798614 |         |            | 7.792733 |         |            | 7.786853 |         |            |
| 12765,   | 175810, | 3120.5847, | 12803,   | 176916, | 3118.2315, | 12841,   | 176582, | 3115.8783, |
| 7.798459 |         |            | 7.792579 |         |            | 7.786698 |         |            |
| 12766,   | 176080, | 3120.5228, | 12804,   | 177066, | 3118.1696, | 12842,   | 176180, | 3115.8163, |
| 7.798305 |         |            | 7.792424 |         |            | 7.786543 |         |            |
| 12767,   | 176836, | 3120.4609, | 12805,   | 177924, | 3118.1076, | 12843,   | 175708, | 3115.7544, |
| 7.798150 |         |            | 7.792269 |         |            | 7.786388 |         |            |
| 12768,   | 177656, | 3120.3989, | 12806,   | 179268, | 3118.0457, | 12844,   | 174984, | 3115.6925, |
| 7.797995 |         |            | 7.792114 |         |            | 7.786234 |         |            |
| 12769,   | 178158, | 3120.3370, | 12807,   | 180560, | 3117.9838, | 12845,   | 174084, | 3115.6306, |
| 7.797840 |         |            | 7.791960 |         |            | 7.786079 |         |            |
| 12770,   | 178288, | 3120.2751, | 12808,   | 181326, | 3117.9219, | 12846,   | 173330, | 3115.5686, |
| 7.797686 |         |            | 7.791805 |         |            | 7.785924 |         |            |
| 12771,   | 178228, | 3120.2132, | 12809,   | 181402, | 3117.8599, | 12847,   | 172948, | 3115.5067, |
| 7.797531 |         |            | 7.791650 |         |            | 7.785769 |         |            |
| 12772,   | 178110, | 3120.1512, | 12810,   | 180932, | 3117.7980, | 12848,   | 172906, | 3115.4448, |
| 7.797376 |         |            | 7.791495 |         |            | 7.785614 |         |            |
| 12773,   | 177890, | 3120.0893, | 12811,   | 180242, | 3117.7361, | 12849,   | 173010, | 3115.3829, |
| 7.797221 |         |            | 7.791341 |         |            | 7.785460 |         |            |
| 12774,   | 177496, | 3120.0274, | 12812,   | 179640, | 3117.6741, | 12850,   | 173168, | 3115.3209, |
| 7.797067 |         |            | 7.791186 |         |            | 7.785305 |         |            |
| 12775,   | 177014, | 3119.9654, | 12813,   | 179298, | 3117.6122, | 12851,   | 173494, | 3115.2590, |
| 7.796912 |         |            | 7.791031 |         |            | 7.785150 |         |            |
| 12776,   | 176628, | 3119.9035, | 12814,   | 179180, | 3117.5503, | 12852,   | 174060, | 3115.1971, |
| 7.796757 |         |            | 7.790876 |         |            | 7.784995 |         |            |

|          |         |            |          |         |            |          |         |            |
|----------|---------|------------|----------|---------|------------|----------|---------|------------|
| 12853,   | 174696, | 3115.1351, | 12891,   | 176478, | 3112.7819, | 12929,   | 174132, | 3110.4287, |
| 7.784841 |         |            | 7.778960 |         |            | 7.773079 |         |            |
| 12854,   | 175054, | 3115.0732, | 12892,   | 176792, | 3112.7200, | 12930,   | 175520, | 3110.3668, |
| 7.784686 |         |            | 7.778805 |         |            | 7.772924 |         |            |
| 12855,   | 174938, | 3115.0113, | 12893,   | 176724, | 3112.6581, | 12931,   | 176732, | 3110.3048, |
| 7.784531 |         |            | 7.778650 |         |            | 7.772770 |         |            |
| 12856,   | 174508, | 3114.9494, | 12894,   | 176522, | 3112.5961, | 12932,   | 177532, | 3110.2429, |
| 7.784376 |         |            | 7.778496 |         |            | 7.772615 |         |            |
| 12857,   | 174126, | 3114.8874, | 12895,   | 176540, | 3112.5342, | 12933,   | 177964, | 3110.1810, |
| 7.784222 |         |            | 7.778341 |         |            | 7.772460 |         |            |
| 12858,   | 173970, | 3114.8255, | 12896,   | 176812, | 3112.4723, | 12934,   | 178114, | 3110.1191, |
| 7.784067 |         |            | 7.778186 |         |            | 7.772305 |         |            |
| 12859,   | 173902, | 3114.7636, | 12897,   | 176958, | 3112.4104, | 12935,   | 177896, | 3110.0571, |
| 7.783912 |         |            | 7.778031 |         |            | 7.772151 |         |            |
| 12860,   | 173680, | 3114.7017, | 12898,   | 176606, | 3112.3484, | 12936,   | 177248, | 3109.9952, |
| 7.783757 |         |            | 7.777877 |         |            | 7.771996 |         |            |
| 12861,   | 173330, | 3114.6397, | 12899,   | 175868, | 3112.2865, | 12937,   | 176386, | 3109.9333, |
| 7.783603 |         |            | 7.777722 |         |            | 7.771841 |         |            |
| 12862,   | 173156, | 3114.5778, | 12900,   | 175260, | 3112.2246, | 12938,   | 175796, | 3109.8714, |
| 7.783448 |         |            | 7.777567 |         |            | 7.771686 |         |            |
| 12863,   | 173468, | 3114.5159, | 12901,   | 175252, | 3112.1627, | 12939,   | 175848, | 3109.8094, |
| 7.783293 |         |            | 7.777412 |         |            | 7.771532 |         |            |
| 12864,   | 174242, | 3114.4539, | 12902,   | 175782, | 3112.1007, | 12940,   | 176414, | 3109.7475, |
| 7.783138 |         |            | 7.777258 |         |            | 7.771377 |         |            |
| 12865,   | 175154, | 3114.3920, | 12903,   | 176360, | 3112.0388, | 12941,   | 176956, | 3109.6856, |
| 7.782984 |         |            | 7.777103 |         |            | 7.771222 |         |            |
| 12866,   | 175932, | 3114.3301, | 12904,   | 176616, | 3111.9769, | 12942,   | 177024, | 3109.6237, |
| 7.782829 |         |            | 7.776948 |         |            | 7.771067 |         |            |
| 12867,   | 176552, | 3114.2682, | 12905,   | 176638, | 3111.9149, | 12943,   | 176654, | 3109.5617, |
| 7.782674 |         |            | 7.776793 |         |            | 7.770913 |         |            |
| 12868,   | 177126, | 3114.2062, | 12906,   | 176812, | 3111.8530, | 12944,   | 176284, | 3109.4998, |
| 7.782519 |         |            | 7.776639 |         |            | 7.770758 |         |            |
| 12869,   | 177606, | 3114.1443, | 12907,   | 177326, | 3111.7911, | 12945,   | 176320, | 3109.4379, |
| 7.782365 |         |            | 7.776484 |         |            | 7.770603 |         |            |
| 12870,   | 177686, | 3114.0824, | 12908,   | 177938, | 3111.7292, | 12946,   | 176764, | 3109.3759, |
| 7.782210 |         |            | 7.776329 |         |            | 7.770448 |         |            |
| 12871,   | 177114, | 3114.0205, | 12909,   | 178262, | 3111.6672, | 12947,   | 177320, | 3109.3140, |
| 7.782055 |         |            | 7.776174 |         |            | 7.770293 |         |            |
| 12872,   | 176004, | 3113.9585, | 12910,   | 178180, | 3111.6053, | 12948,   | 177724, | 3109.2521, |
| 7.781900 |         |            | 7.776020 |         |            | 7.770139 |         |            |
| 12873,   | 174854, | 3113.8966, | 12911,   | 177978, | 3111.5434, | 12949,   | 177984, | 3109.1902, |
| 7.781746 |         |            | 7.775865 |         |            | 7.769984 |         |            |
| 12874,   | 174152, | 3113.8347, | 12912,   | 177992, | 3111.4815, | 12950,   | 178232, | 3109.1282, |
| 7.781591 |         |            | 7.775710 |         |            | 7.769829 |         |            |
| 12875,   | 174038, | 3113.7728, | 12913,   | 178218, | 3111.4195, | 12951,   | 178480, | 3109.0663, |
| 7.781436 |         |            | 7.775555 |         |            | 7.769674 |         |            |
| 12876,   | 174302, | 3113.7108, | 12914,   | 178360, | 3111.3576, | 12952,   | 178620, | 3109.0044, |
| 7.781281 |         |            | 7.775400 |         |            | 7.769520 |         |            |
| 12877,   | 174682, | 3113.6489, | 12915,   | 178184, | 3111.2957, | 12953,   | 178604, | 3108.9425, |
| 7.781127 |         |            | 7.775246 |         |            | 7.769365 |         |            |
| 12878,   | 175084, | 3113.5870, | 12916,   | 177798, | 3111.2337, | 12954,   | 178564, | 3108.8805, |
| 7.780972 |         |            | 7.775091 |         |            | 7.769210 |         |            |
| 12879,   | 175524, | 3113.5250, | 12917,   | 177472, | 3111.1718, | 12955,   | 178714, | 3108.8186, |
| 7.780817 |         |            | 7.774936 |         |            | 7.769055 |         |            |
| 12880,   | 175940, | 3113.4631, | 12918,   | 177326, | 3111.1099, | 12956,   | 179060, | 3108.7567, |
| 7.780662 |         |            | 7.774781 |         |            | 7.768901 |         |            |
| 12881,   | 176150, | 3113.4012, | 12919,   | 177176, | 3111.0480, | 12957,   | 179370, | 3108.6947, |
| 7.780507 |         |            | 7.774627 |         |            | 7.768746 |         |            |
| 12882,   | 176058, | 3113.3393, | 12920,   | 176784, | 3110.9860, | 12958,   | 179410, | 3108.6328, |
| 7.780353 |         |            | 7.774472 |         |            | 7.768591 |         |            |
| 12883,   | 175790, | 3113.2773, | 12921,   | 176164, | 3110.9241, | 12959,   | 179194, | 3108.5709, |
| 7.780198 |         |            | 7.774317 |         |            | 7.768436 |         |            |
| 12884,   | 175600, | 3113.2154, | 12922,   | 175540, | 3110.8622, | 12960,   | 178950, | 3108.5090, |
| 7.780043 |         |            | 7.774162 |         |            | 7.768282 |         |            |
| 12885,   | 175592, | 3113.1535, | 12923,   | 175076, | 3110.8003, | 12961,   | 178828, | 3108.4470, |
| 7.779888 |         |            | 7.774008 |         |            | 7.768127 |         |            |
| 12886,   | 175634, | 3113.0916, | 12924,   | 174648, | 3110.7383, | 12962,   | 178698, | 3108.3851, |
| 7.779734 |         |            | 7.773853 |         |            | 7.767972 |         |            |
| 12887,   | 175562, | 3113.0296, | 12925,   | 174038, | 3110.6764, | 12963,   | 178286, | 3108.3232, |
| 7.779579 |         |            | 7.773698 |         |            | 7.767817 |         |            |
| 12888,   | 175438, | 3112.9677, | 12926,   | 173294, | 3110.6145, | 12964,   | 177540, | 3108.2613, |
| 7.779424 |         |            | 7.773543 |         |            | 7.767663 |         |            |
| 12889,   | 175516, | 3112.9058, | 12927,   | 172834, | 3110.5526, | 12965,   | 176728, | 3108.1993, |
| 7.779269 |         |            | 7.773389 |         |            | 7.767508 |         |            |
| 12890,   | 175930, | 3112.8438, | 12928,   | 173096, | 3110.4906, | 12966,   | 176254, | 3108.1374, |
| 7.779115 |         |            | 7.773234 |         |            | 7.767353 |         |            |

|          |         |            |          |         |            |          |         |            |
|----------|---------|------------|----------|---------|------------|----------|---------|------------|
| 12967,   | 176268, | 3108.0755, | 13005,   | 180030, | 3105.7223, | 13043,   | 178178, | 3103.3690, |
| 7.767198 |         |            | 7.761318 |         |            | 7.755437 |         |            |
| 12968,   | 176576, | 3108.0136, | 13006,   | 179450, | 3105.6603, | 13044,   | 179056, | 3103.3071, |
| 7.767044 |         |            | 7.761163 |         |            | 7.755282 |         |            |
| 12969,   | 176882, | 3107.9516, | 13007,   | 178374, | 3105.5984, | 13045,   | 179768, | 3103.2452, |
| 7.766889 |         |            | 7.761008 |         |            | 7.755127 |         |            |
| 12970,   | 177094, | 3107.8897, | 13008,   | 177338, | 3105.5365, | 13046,   | 180326, | 3103.1833, |
| 7.766734 |         |            | 7.760853 |         |            | 7.754972 |         |            |
| 12971,   | 177352, | 3107.8278, | 13009,   | 176798, | 3105.4745, | 13047,   | 180714, | 3103.1213, |
| 7.766579 |         |            | 7.760698 |         |            | 7.754818 |         |            |
| 12972,   | 177782, | 3107.7658, | 13010,   | 176778, | 3105.4126, | 13048,   | 180732, | 3103.0594, |
| 7.766425 |         |            | 7.760544 |         |            | 7.754663 |         |            |
| 12973,   | 178316, | 3107.7039, | 13011,   | 176954, | 3105.3507, | 13049,   | 180160, | 3102.9975, |
| 7.766270 |         |            | 7.760389 |         |            | 7.754508 |         |            |
| 12974,   | 178730, | 3107.6420, | 13012,   | 177044, | 3105.2888, | 13050,   | 179090, | 3102.9355, |
| 7.766115 |         |            | 7.760234 |         |            | 7.754353 |         |            |
| 12975,   | 178898, | 3107.5801, | 13013,   | 177096, | 3105.2268, | 13051,   | 178018, | 3102.8736, |
| 7.765960 |         |            | 7.760079 |         |            | 7.754199 |         |            |
| 12976,   | 178886, | 3107.5181, | 13014,   | 177406, | 3105.1649, | 13052,   | 177480, | 3102.8117, |
| 7.765806 |         |            | 7.759925 |         |            | 7.754044 |         |            |
| 12977,   | 178820, | 3107.4562, | 13015,   | 178132, | 3105.1030, | 13053,   | 177606, | 3102.7498, |
| 7.765651 |         |            | 7.759770 |         |            | 7.753889 |         |            |
| 12978,   | 178672, | 3107.3943, | 13016,   | 179070, | 3105.0411, | 13054,   | 178018, | 3102.6878, |
| 7.765496 |         |            | 7.759615 |         |            | 7.753734 |         |            |
| 12979,   | 178276, | 3107.3324, | 13017,   | 179826, | 3104.9791, | 13055,   | 178220, | 3102.6259, |
| 7.765341 |         |            | 7.759460 |         |            | 7.753580 |         |            |
| 12980,   | 177560, | 3107.2704, | 13018,   | 180122, | 3104.9172, | 13056,   | 178078, | 3102.5640, |
| 7.765186 |         |            | 7.759306 |         |            | 7.753425 |         |            |
| 12981,   | 176710, | 3107.2085, | 13019,   | 179980, | 3104.8553, | 13057,   | 177854, | 3102.5021, |
| 7.765032 |         |            | 7.759151 |         |            | 7.753270 |         |            |
| 12982,   | 176068, | 3107.1466, | 13020,   | 179582, | 3104.7934, | 13058,   | 177840, | 3102.4401, |
| 7.764877 |         |            | 7.758996 |         |            | 7.753115 |         |            |
| 12983,   | 175866, | 3107.0846, | 13021,   | 179064, | 3104.7314, | 13059,   | 177986, | 3102.3782, |
| 7.764722 |         |            | 7.758841 |         |            | 7.752961 |         |            |
| 12984,   | 176052, | 3107.0227, | 13022,   | 178452, | 3104.6695, | 13060,   | 177986, | 3102.3163, |
| 7.764567 |         |            | 7.758687 |         |            | 7.752806 |         |            |
| 12985,   | 176420, | 3106.9608, | 13023,   | 177802, | 3104.6076, | 13061,   | 177660, | 3102.2543, |
| 7.764413 |         |            | 7.758532 |         |            | 7.752651 |         |            |
| 12986,   | 176874, | 3106.8989, | 13024,   | 177310, | 3104.5456, | 13062,   | 177222, | 3102.1924, |
| 7.764258 |         |            | 7.758377 |         |            | 7.752496 |         |            |
| 12987,   | 177468, | 3106.8369, | 13025,   | 177176, | 3104.4837, | 13063,   | 177070, | 3102.1305, |
| 7.764103 |         |            | 7.758222 |         |            | 7.752342 |         |            |
| 12988,   | 178264, | 3106.7750, | 13026,   | 177416, | 3104.4218, | 13064,   | 177352, | 3102.0686, |
| 7.763948 |         |            | 7.758068 |         |            | 7.752187 |         |            |
| 12989,   | 179132, | 3106.7131, | 13027,   | 177812, | 3104.3599, | 13065,   | 177856, | 3102.0066, |
| 7.763794 |         |            | 7.757913 |         |            | 7.752032 |         |            |
| 12990,   | 179758, | 3106.6512, | 13028,   | 178082, | 3104.2979, | 13066,   | 178248, | 3101.9447, |
| 7.763639 |         |            | 7.757758 |         |            | 7.751877 |         |            |
| 12991,   | 179892, | 3106.5892, | 13029,   | 178110, | 3104.2360, | 13067,   | 178478, | 3101.8828, |
| 7.763484 |         |            | 7.757603 |         |            | 7.751723 |         |            |
| 12992,   | 179604, | 3106.5273, | 13030,   | 177942, | 3104.1741, | 13068,   | 178788, | 3101.8209, |
| 7.763329 |         |            | 7.757449 |         |            | 7.751568 |         |            |
| 12993,   | 179234, | 3106.4654, | 13031,   | 177666, | 3104.1122, | 13069,   | 179406, | 3101.7589, |
| 7.763175 |         |            | 7.757294 |         |            | 7.751413 |         |            |
| 12994,   | 179160, | 3106.4035, | 13032,   | 177308, | 3104.0502, | 13070,   | 180216, | 3101.6970, |
| 7.763020 |         |            | 7.757139 |         |            | 7.751258 |         |            |
| 12995,   | 179538, | 3106.3415, | 13033,   | 176902, | 3103.9883, | 13071,   | 180826, | 3101.6351, |
| 7.762865 |         |            | 7.756984 |         |            | 7.751104 |         |            |
| 12996,   | 180206, | 3106.2796, | 13034,   | 176598, | 3103.9264, | 13072,   | 180974, | 3101.5732, |
| 7.762710 |         |            | 7.756830 |         |            | 7.750949 |         |            |
| 12997,   | 180824, | 3106.2177, | 13035,   | 176596, | 3103.8644, | 13073,   | 180728, | 3101.5112, |
| 7.762556 |         |            | 7.756675 |         |            | 7.750794 |         |            |
| 12998,   | 181062, | 3106.1557, | 13036,   | 176938, | 3103.8025, | 13074,   | 180364, | 3101.4493, |
| 7.762401 |         |            | 7.756520 |         |            | 7.750639 |         |            |
| 12999,   | 180778, | 3106.0938, | 13037,   | 177368, | 3103.7406, | 13075,   | 180034, | 3101.3874, |
| 7.762246 |         |            | 7.756365 |         |            | 7.750484 |         |            |
| 13000,   | 180126, | 3106.0319, | 13038,   | 177516, | 3103.6787, | 13076,   | 179634, | 3101.3254, |
| 7.762091 |         |            | 7.756211 |         |            | 7.750330 |         |            |
| 13001,   | 179486, | 3105.9700, | 13039,   | 177262, | 3103.6167, | 13077,   | 179018, | 3101.2635, |
| 7.761937 |         |            | 7.756056 |         |            | 7.750175 |         |            |
| 13002,   | 179242, | 3105.9080, | 13040,   | 176886, | 3103.5548, | 13078,   | 178270, | 3101.2016, |
| 7.761782 |         |            | 7.755901 |         |            | 7.750020 |         |            |
| 13003,   | 179498, | 3105.8461, | 13041,   | 176834, | 3103.4929, | 13079,   | 177694, | 3101.1397, |
| 7.761627 |         |            | 7.755746 |         |            | 7.749865 |         |            |
| 13004,   | 179938, | 3105.7842, | 13042,   | 177322, | 3103.4310, | 13080,   | 177510, | 3101.0777, |
| 7.761472 |         |            | 7.755591 |         |            | 7.749711 |         |            |

|          |         |            |          |         |            |          |         |            |
|----------|---------|------------|----------|---------|------------|----------|---------|------------|
| 13081,   | 177678, | 3101.0158, | 13119,   | 177688, | 3098.6626, | 13157,   | 182088, | 3096.3094, |
| 7.749556 |         |            | 7.743675 |         |            | 7.737794 |         |            |
| 13082,   | 177968, | 3100.9539, | 13120,   | 177844, | 3098.6007, | 13158,   | 181898, | 3096.2474, |
| 7.749401 |         |            | 7.743520 |         |            | 7.737640 |         |            |
| 13083,   | 178264, | 3100.8920, | 13121,   | 177750, | 3098.5387, | 13159,   | 181094, | 3096.1855, |
| 7.749246 |         |            | 7.743366 |         |            | 7.737485 |         |            |
| 13084,   | 178632, | 3100.8300, | 13122,   | 177532, | 3098.4768, | 13160,   | 180118, | 3096.1236, |
| 7.749092 |         |            | 7.743211 |         |            | 7.737330 |         |            |
| 13085,   | 179162, | 3100.7681, | 13123,   | 177402, | 3098.4149, | 13161,   | 179450, | 3096.0617, |
| 7.748937 |         |            | 7.743056 |         |            | 7.737175 |         |            |
| 13086,   | 179702, | 3100.7062, | 13124,   | 177398, | 3098.3530, | 13162,   | 179200, | 3095.9997, |
| 7.748782 |         |            | 7.742901 |         |            | 7.737021 |         |            |
| 13087,   | 179942, | 3100.6442, | 13125,   | 177414, | 3098.2910, | 13163,   | 179090, | 3095.9378, |
| 7.748627 |         |            | 7.742747 |         |            | 7.736866 |         |            |
| 13088,   | 179688, | 3100.5823, | 13126,   | 177384, | 3098.2291, | 13164,   | 178846, | 3095.8759, |
| 7.748473 |         |            | 7.742592 |         |            | 7.736711 |         |            |
| 13089,   | 179096, | 3100.5204, | 13127,   | 177378, | 3098.1672, | 13165,   | 178508, | 3095.8140, |
| 7.748318 |         |            | 7.742437 |         |            | 7.736556 |         |            |
| 13090,   | 178536, | 3100.4585, | 13128,   | 177474, | 3098.1052, | 13166,   | 178348, | 3095.7520, |
| 7.748163 |         |            | 7.742282 |         |            | 7.736402 |         |            |
| 13091,   | 178234, | 3100.3965, | 13129,   | 177596, | 3098.0433, | 13167,   | 178520, | 3095.6901, |
| 7.748008 |         |            | 7.742128 |         |            | 7.736247 |         |            |
| 13092,   | 178086, | 3100.3346, | 13130,   | 177544, | 3097.9814, | 13168,   | 178888, | 3095.6282, |
| 7.747854 |         |            | 7.741973 |         |            | 7.736092 |         |            |
| 13093,   | 177828, | 3100.2727, | 13131,   | 177234, | 3097.9195, | 13169,   | 179192, | 3095.5662, |
| 7.747699 |         |            | 7.741818 |         |            | 7.735937 |         |            |
| 13094,   | 177378, | 3100.2108, | 13132,   | 176852, | 3097.8575, | 13170,   | 179344, | 3095.5043, |
| 7.747544 |         |            | 7.741663 |         |            | 7.735783 |         |            |
| 13095,   | 176956, | 3100.1488, | 13133,   | 176726, | 3097.7956, | 13171,   | 179494, | 3095.4424, |
| 7.747389 |         |            | 7.741509 |         |            | 7.735628 |         |            |
| 13096,   | 176860, | 3100.0869, | 13134,   | 177016, | 3097.7337, | 13172,   | 179784, | 3095.3805, |
| 7.747235 |         |            | 7.741354 |         |            | 7.735473 |         |            |
| 13097,   | 177158, | 3100.0250, | 13135,   | 177548, | 3097.6718, | 13173,   | 180136, | 3095.3185, |
| 7.747080 |         |            | 7.741199 |         |            | 7.735318 |         |            |
| 13098,   | 177642, | 3099.9631, | 13136,   | 178006, | 3097.6098, | 13174,   | 180308, | 3095.2566, |
| 7.746925 |         |            | 7.741044 |         |            | 7.735163 |         |            |
| 13099,   | 178046, | 3099.9011, | 13137,   | 178258, | 3097.5479, | 13175,   | 180220, | 3095.1947, |
| 7.746770 |         |            | 7.740890 |         |            | 7.735009 |         |            |
| 13100,   | 178250, | 3099.8392, | 13138,   | 178410, | 3097.4860, | 13176,   | 180072, | 3095.1328, |
| 7.746616 |         |            | 7.740735 |         |            | 7.734854 |         |            |
| 13101,   | 178292, | 3099.7773, | 13139,   | 178626, | 3097.4240, | 13177,   | 180184, | 3095.0708, |
| 7.746461 |         |            | 7.740580 |         |            | 7.734699 |         |            |
| 13102,   | 178230, | 3099.7153, | 13140,   | 178864, | 3097.3621, | 13178,   | 180626, | 3095.0089, |
| 7.746306 |         |            | 7.740425 |         |            | 7.734544 |         |            |
| 13103,   | 178062, | 3099.6534, | 13141,   | 178952, | 3097.3002, | 13179,   | 181094, | 3094.9470, |
| 7.746151 |         |            | 7.740270 |         |            | 7.734390 |         |            |
| 13104,   | 177832, | 3099.5915, | 13142,   | 178830, | 3097.2383, | 13180,   | 181176, | 3094.8850, |
| 7.745997 |         |            | 7.740116 |         |            | 7.734235 |         |            |
| 13105,   | 177710, | 3099.5296, | 13143,   | 178692, | 3097.1763, | 13181,   | 180710, | 3094.8231, |
| 7.745842 |         |            | 7.739961 |         |            | 7.734080 |         |            |
| 13106,   | 177904, | 3099.4676, | 13144,   | 178804, | 3097.1144, | 13182,   | 179918, | 3094.7612, |
| 7.745687 |         |            | 7.739806 |         |            | 7.733925 |         |            |
| 13107,   | 178444, | 3099.4057, | 13145,   | 179184, | 3097.0525, | 13183,   | 179192, | 3094.6993, |
| 7.745532 |         |            | 7.739651 |         |            | 7.733771 |         |            |
| 13108,   | 179090, | 3099.3438, | 13146,   | 179536, | 3096.9906, | 13184,   | 178794, | 3094.6373, |
| 7.745377 |         |            | 7.739497 |         |            | 7.733616 |         |            |
| 13109,   | 179550, | 3099.2819, | 13147,   | 179576, | 3096.9286, | 13185,   | 178738, | 3094.5754, |
| 7.745223 |         |            | 7.739342 |         |            | 7.733461 |         |            |
| 13110,   | 179702, | 3099.2199, | 13148,   | 179346, | 3096.8667, | 13186,   | 178856, | 3094.5135, |
| 7.745068 |         |            | 7.739187 |         |            | 7.733306 |         |            |
| 13111,   | 179674, | 3099.1580, | 13149,   | 179200, | 3096.8048, | 13187,   | 179000, | 3094.4516, |
| 7.744913 |         |            | 7.739032 |         |            | 7.733152 |         |            |
| 13112,   | 179612, | 3099.0961, | 13150,   | 179430, | 3096.7429, | 13188,   | 179066, | 3094.3896, |
| 7.744758 |         |            | 7.738878 |         |            | 7.732997 |         |            |
| 13113,   | 179484, | 3099.0341, | 13151,   | 179946, | 3096.6809, | 13189,   | 179016, | 3094.3277, |
| 7.744604 |         |            | 7.738723 |         |            | 7.732842 |         |            |
| 13114,   | 179118, | 3098.9722, | 13152,   | 180416, | 3096.6190, | 13190,   | 178884, | 3094.2658, |
| 7.744449 |         |            | 7.738568 |         |            | 7.732687 |         |            |
| 13115,   | 178476, | 3098.9103, | 13153,   | 180634, | 3096.5571, | 13191,   | 178770, | 3094.2039, |
| 7.744294 |         |            | 7.738413 |         |            | 7.732533 |         |            |
| 13116,   | 177786, | 3098.8484, | 13154,   | 180772, | 3096.4951, | 13192,   | 178784, | 3094.1419, |
| 7.744139 |         |            | 7.738259 |         |            | 7.732378 |         |            |
| 13117,   | 177394, | 3098.7864, | 13155,   | 181120, | 3096.4332, | 13193,   | 178930, | 3094.0800, |
| 7.743985 |         |            | 7.738104 |         |            | 7.732223 |         |            |
| 13118,   | 177428, | 3098.7245, | 13156,   | 181688, | 3096.3713, | 13194,   | 179074, | 3094.0181, |
| 7.743830 |         |            | 7.737949 |         |            | 7.732068 |         |            |

|          |         |            |          |         |            |          |         |            |
|----------|---------|------------|----------|---------|------------|----------|---------|------------|
| 13195,   | 179066, | 3093.9561, | 13233,   | 177656, | 3091.6029, | 13271,   | 180634, | 3089.2497, |
| 7.731914 |         |            | 7.726033 |         |            | 7.720152 |         |            |
| 13196,   | 178934, | 3093.8942, | 13234,   | 177676, | 3091.5410, | 13272,   | 180450, | 3089.1878, |
| 7.731759 |         |            | 7.725878 |         |            | 7.719997 |         |            |
| 13197,   | 178894, | 3093.8323, | 13235,   | 177454, | 3091.4791, | 13273,   | 180410, | 3089.1258, |
| 7.731604 |         |            | 7.725723 |         |            | 7.719842 |         |            |
| 13198,   | 179128, | 3093.7704, | 13236,   | 177170, | 3091.4171, | 13274,   | 180656, | 3089.0639, |
| 7.731449 |         |            | 7.725569 |         |            | 7.719688 |         |            |
| 13199,   | 179502, | 3093.7084, | 13237,   | 176960, | 3091.3552, | 13275,   | 181110, | 3089.0020, |
| 7.731295 |         |            | 7.725414 |         |            | 7.719533 |         |            |
| 13200,   | 179624, | 3093.6465, | 13238,   | 176814, | 3091.2933, | 13276,   | 181524, | 3088.9401, |
| 7.731140 |         |            | 7.725259 |         |            | 7.719378 |         |            |
| 13201,   | 179158, | 3093.5846, | 13239,   | 176648, | 3091.2314, | 13277,   | 181766, | 3088.8781, |
| 7.730985 |         |            | 7.725104 |         |            | 7.719223 |         |            |
| 13202,   | 178208, | 3093.5227, | 13240,   | 176490, | 3091.1694, | 13278,   | 181934, | 3088.8162, |
| 7.730830 |         |            | 7.724949 |         |            | 7.719069 |         |            |
| 13203,   | 177250, | 3093.4607, | 13241,   | 176520, | 3091.1075, | 13279,   | 182166, | 3088.7543, |
| 7.730676 |         |            | 7.724795 |         |            | 7.718914 |         |            |
| 13204,   | 176740, | 3093.3988, | 13242,   | 176916, | 3091.0456, | 13280,   | 182344, | 3088.6924, |
| 7.730521 |         |            | 7.724640 |         |            | 7.718759 |         |            |
| 13205,   | 176736, | 3093.3369, | 13243,   | 177696, | 3090.9837, | 13281,   | 182106, | 3088.6304, |
| 7.730366 |         |            | 7.724485 |         |            | 7.718604 |         |            |
| 13206,   | 176934, | 3093.2749, | 13244,   | 178684, | 3090.9217, | 13282,   | 181206, | 3088.5685, |
| 7.730211 |         |            | 7.724330 |         |            | 7.718450 |         |            |
| 13207,   | 177028, | 3093.2130, | 13245,   | 179646, | 3090.8598, | 13283,   | 179862, | 3088.5066, |
| 7.730056 |         |            | 7.724176 |         |            | 7.718295 |         |            |
| 13208,   | 177038, | 3093.1511, | 13246,   | 180410, | 3090.7979, | 13284,   | 178656, | 3088.4446, |
| 7.729902 |         |            | 7.724021 |         |            | 7.718140 |         |            |
| 13209,   | 177234, | 3093.0892, | 13247,   | 180848, | 3090.7359, | 13285,   | 178030, | 3088.3827, |
| 7.729747 |         |            | 7.723866 |         |            | 7.717985 |         |            |
| 13210,   | 177808, | 3093.0272, | 13248,   | 180858, | 3090.6740, | 13286,   | 177918, | 3088.3208, |
| 7.729592 |         |            | 7.723711 |         |            | 7.717831 |         |            |
| 13211,   | 178648, | 3092.9653, | 13249,   | 180448, | 3090.6121, | 13287,   | 177878, | 3088.2589, |
| 7.729437 |         |            | 7.723557 |         |            | 7.717676 |         |            |
| 13212,   | 179458, | 3092.9034, | 13250,   | 179812, | 3090.5502, | 13288,   | 177574, | 3088.1969, |
| 7.729283 |         |            | 7.723402 |         |            | 7.717521 |         |            |
| 13213,   | 180068, | 3092.8415, | 13251,   | 179274, | 3090.4882, | 13289,   | 177130, | 3088.1350, |
| 7.729128 |         |            | 7.723247 |         |            | 7.717366 |         |            |
| 13214,   | 180540, | 3092.7795, | 13252,   | 179108, | 3090.4263, | 13290,   | 176936, | 3088.0731, |
| 7.728973 |         |            | 7.723092 |         |            | 7.717212 |         |            |
| 13215,   | 181002, | 3092.7176, | 13253,   | 179296, | 3090.3644, | 13291,   | 177200, | 3088.0112, |
| 7.728818 |         |            | 7.722938 |         |            | 7.717057 |         |            |
| 13216,   | 181410, | 3092.6557, | 13254,   | 179582, | 3090.3025, | 13292,   | 177704, | 3087.9492, |
| 7.728664 |         |            | 7.722783 |         |            | 7.716902 |         |            |
| 13217,   | 181564, | 3092.5938, | 13255,   | 179734, | 3090.2405, | 13293,   | 178080, | 3087.8873, |
| 7.728509 |         |            | 7.722628 |         |            | 7.716747 |         |            |
| 13218,   | 181306, | 3092.5318, | 13256,   | 179752, | 3090.1786, | 13294,   | 178178, | 3087.8254, |
| 7.728354 |         |            | 7.722473 |         |            | 7.716593 |         |            |
| 13219,   | 180720, | 3092.4699, | 13257,   | 179820, | 3090.1167, | 13295,   | 178184, | 3087.7635, |
| 7.728199 |         |            | 7.722319 |         |            | 7.716438 |         |            |
| 13220,   | 180040, | 3092.4080, | 13258,   | 180030, | 3090.0547, | 13296,   | 178366, | 3087.7015, |
| 7.728045 |         |            | 7.722164 |         |            | 7.716283 |         |            |
| 13221,   | 179452, | 3092.3460, | 13259,   | 180216, | 3089.9928, | 13297,   | 178768, | 3087.6396, |
| 7.727890 |         |            | 7.722009 |         |            | 7.716128 |         |            |
| 13222,   | 178948, | 3092.2841, | 13260,   | 180156, | 3089.9309, | 13298,   | 179254, | 3087.5777, |
| 7.727735 |         |            | 7.721854 |         |            | 7.715974 |         |            |
| 13223,   | 178450, | 3092.2222, | 13261,   | 179828, | 3089.8690, | 13299,   | 179760, | 3087.5157, |
| 7.727580 |         |            | 7.721700 |         |            | 7.715819 |         |            |
| 13224,   | 177954, | 3092.1603, | 13262,   | 179516, | 3089.8070, | 13300,   | 180402, | 3087.4538, |
| 7.727426 |         |            | 7.721545 |         |            | 7.715664 |         |            |
| 13225,   | 177582, | 3092.0983, | 13263,   | 179554, | 3089.7451, | 13301,   | 181286, | 3087.3919, |
| 7.727271 |         |            | 7.721390 |         |            | 7.715509 |         |            |
| 13226,   | 177390, | 3092.0364, | 13264,   | 179990, | 3089.6832, | 13302,   | 182248, | 3087.3300, |
| 7.727116 |         |            | 7.721235 |         |            | 7.715354 |         |            |
| 13227,   | 177298, | 3091.9745, | 13265,   | 180544, | 3089.6213, | 13303,   | 182900, | 3087.2680, |
| 7.726961 |         |            | 7.721081 |         |            | 7.715200 |         |            |
| 13228,   | 177162, | 3091.9126, | 13266,   | 180886, | 3089.5593, | 13304,   | 182948, | 3087.2061, |
| 7.726807 |         |            | 7.720926 |         |            | 7.715045 |         |            |
| 13229,   | 176972, | 3091.8506, | 13267,   | 180930, | 3089.4974, | 13305,   | 182498, | 3087.1442, |
| 7.726652 |         |            | 7.720771 |         |            | 7.714890 |         |            |
| 13230,   | 176880, | 3091.7887, | 13268,   | 180844, | 3089.4355, | 13306,   | 181864, | 3087.0823, |
| 7.726497 |         |            | 7.720616 |         |            | 7.714735 |         |            |
| 13231,   | 177032, | 3091.7268, | 13269,   | 180792, | 3089.3736, | 13307,   | 181246, | 3087.0203, |
| 7.726342 |         |            | 7.720462 |         |            | 7.714581 |         |            |
| 13232,   | 177368, | 3091.6648, | 13270,   | 180754, | 3089.3116, | 13308,   | 180520, | 3086.9584, |
| 7.726188 |         |            | 7.720307 |         |            | 7.714426 |         |            |



|          |         |            |          |         |            |          |         |            |
|----------|---------|------------|----------|---------|------------|----------|---------|------------|
| 13309,   | 179502, | 3086.8965, | 13347,   | 183262, | 3084.5433, | 13385,   | 179624, | 3082.1900, |
| 7.714271 |         |            | 7.708390 |         |            | 7.702510 |         |            |
| 13310,   | 178328, | 3086.8345, | 13348,   | 182586, | 3084.4813, | 13386,   | 179640, | 3082.1281, |
| 7.714116 |         |            | 7.708236 |         |            | 7.702355 |         |            |
| 13311,   | 177474, | 3086.7726, | 13349,   | 181716, | 3084.4194, | 13387,   | 179730, | 3082.0662, |
| 7.713962 |         |            | 7.708081 |         |            | 7.702200 |         |            |
| 13312,   | 177328, | 3086.7107, | 13350,   | 181360, | 3084.3575, | 13388,   | 180134, | 3082.0043, |
| 7.713807 |         |            | 7.707926 |         |            | 7.702045 |         |            |
| 13313,   | 177762, | 3086.6488, | 13351,   | 181704, | 3084.2955, | 13389,   | 180876, | 3081.9423, |
| 7.713652 |         |            | 7.707771 |         |            | 7.701891 |         |            |
| 13314,   | 178216, | 3086.5868, | 13352,   | 182232, | 3084.2336, | 13390,   | 181688, | 3081.8804, |
| 7.713497 |         |            | 7.707617 |         |            | 7.701736 |         |            |
| 13315,   | 178242, | 3086.5249, | 13353,   | 182314, | 3084.1717, | 13391,   | 182274, | 3081.8185, |
| 7.713343 |         |            | 7.707462 |         |            | 7.701581 |         |            |
| 13316,   | 177908, | 3086.4630, | 13354,   | 181834, | 3084.1098, | 13392,   | 182586, | 3081.7565, |
| 7.713188 |         |            | 7.707307 |         |            | 7.701426 |         |            |
| 13317,   | 177700, | 3086.4011, | 13355,   | 181236, | 3084.0478, | 13393,   | 182770, | 3081.6946, |
| 7.713033 |         |            | 7.707152 |         |            | 7.701272 |         |            |
| 13318,   | 177960, | 3086.3391, | 13356,   | 180968, | 3083.9859, | 13394,   | 182850, | 3081.6327, |
| 7.712878 |         |            | 7.706998 |         |            | 7.701117 |         |            |
| 13319,   | 178532, | 3086.2772, | 13357,   | 181048, | 3083.9240, | 13395,   | 182594, | 3081.5708, |
| 7.712724 |         |            | 7.706843 |         |            | 7.700962 |         |            |
| 13320,   | 178920, | 3086.2153, | 13358,   | 181150, | 3083.8621, | 13396,   | 181738, | 3081.5088, |
| 7.712569 |         |            | 7.706688 |         |            | 7.700807 |         |            |
| 13321,   | 178810, | 3086.1534, | 13359,   | 181090, | 3083.8001, | 13397,   | 180348, | 3081.4469, |
| 7.712414 |         |            | 7.706533 |         |            | 7.700653 |         |            |
| 13322,   | 178334, | 3086.0914, | 13360,   | 181042, | 3083.7382, | 13398,   | 178864, | 3081.3850, |
| 7.712259 |         |            | 7.706379 |         |            | 7.700498 |         |            |
| 13323,   | 177930, | 3086.0295, | 13361,   | 181284, | 3083.6763, | 13399,   | 177772, | 3081.3231, |
| 7.712105 |         |            | 7.706224 |         |            | 7.700343 |         |            |
| 13324,   | 177944, | 3085.9676, | 13362,   | 181790, | 3083.6143, | 13400,   | 177208, | 3081.2611, |
| 7.711950 |         |            | 7.706069 |         |            | 7.700188 |         |            |
| 13325,   | 178416, | 3085.9056, | 13363,   | 182190, | 3083.5524, | 13401,   | 176996, | 3081.1992, |
| 7.711795 |         |            | 7.705914 |         |            | 7.700033 |         |            |
| 13326,   | 179194, | 3085.8437, | 13364,   | 182146, | 3083.4905, | 13402,   | 176954, | 3081.1373, |
| 7.711640 |         |            | 7.705760 |         |            | 7.699879 |         |            |
| 13327,   | 180066, | 3085.7818, | 13365,   | 181698, | 3083.4286, | 13403,   | 177132, | 3081.0753, |
| 7.711486 |         |            | 7.705605 |         |            | 7.699724 |         |            |
| 13328,   | 180808, | 3085.7199, | 13366,   | 181152, | 3083.3666, | 13404,   | 177698, | 3081.0134, |
| 7.711331 |         |            | 7.705450 |         |            | 7.699569 |         |            |
| 13329,   | 181122, | 3085.6579, | 13367,   | 180690, | 3083.3047, | 13405,   | 178594, | 3080.9515, |
| 7.711176 |         |            | 7.705295 |         |            | 7.699414 |         |            |
| 13330,   | 180802, | 3085.5960, | 13368,   | 180206, | 3083.2428, | 13406,   | 179476, | 3080.8896, |
| 7.711021 |         |            | 7.705140 |         |            | 7.699260 |         |            |
| 13331,   | 179964, | 3085.5341, | 13369,   | 179550, | 3083.1809, | 13407,   | 179986, | 3080.8276, |
| 7.710867 |         |            | 7.704986 |         |            | 7.699105 |         |            |
| 13332,   | 179082, | 3085.4722, | 13370,   | 178894, | 3083.1189, | 13408,   | 180114, | 3080.7657, |
| 7.710712 |         |            | 7.704831 |         |            | 7.698950 |         |            |
| 13333,   | 178680, | 3085.4102, | 13371,   | 178680, | 3083.0570, | 13409,   | 180120, | 3080.7038, |
| 7.710557 |         |            | 7.704676 |         |            | 7.698795 |         |            |
| 13334,   | 178914, | 3085.3483, | 13372,   | 179170, | 3082.9951, | 13410,   | 180222, | 3080.6419, |
| 7.710402 |         |            | 7.704521 |         |            | 7.698641 |         |            |
| 13335,   | 179472, | 3085.2864, | 13373,   | 180086, | 3082.9332, | 13411,   | 180300, | 3080.5799, |
| 7.710247 |         |            | 7.704367 |         |            | 7.698486 |         |            |
| 13336,   | 179966, | 3085.2244, | 13374,   | 180822, | 3082.8712, | 13412,   | 180084, | 3080.5180, |
| 7.710093 |         |            | 7.704212 |         |            | 7.698331 |         |            |
| 13337,   | 180394, | 3085.1625, | 13375,   | 180972, | 3082.8093, | 13413,   | 179514, | 3080.4561, |
| 7.709938 |         |            | 7.704057 |         |            | 7.698176 |         |            |
| 13338,   | 181072, | 3085.1006, | 13376,   | 180742, | 3082.7474, | 13414,   | 178872, | 3080.3942, |
| 7.709783 |         |            | 7.703902 |         |            | 7.698022 |         |            |
| 13339,   | 182178, | 3085.0387, | 13377,   | 180628, | 3082.6854, | 13415,   | 178518, | 3080.3322, |
| 7.709628 |         |            | 7.703748 |         |            | 7.697867 |         |            |
| 13340,   | 183352, | 3084.9767, | 13378,   | 180874, | 3082.6235, | 13416,   | 178506, | 3080.2703, |
| 7.709474 |         |            | 7.703593 |         |            | 7.697712 |         |            |
| 13341,   | 183944, | 3084.9148, | 13379,   | 181216, | 3082.5616, | 13417,   | 178590, | 3080.2084, |
| 7.709319 |         |            | 7.703438 |         |            | 7.697557 |         |            |
| 13342,   | 183656, | 3084.8529, | 13380,   | 181204, | 3082.4997, | 13418,   | 178586, | 3080.1464, |
| 7.709164 |         |            | 7.703283 |         |            | 7.697403 |         |            |
| 13343,   | 182914, | 3084.7910, | 13381,   | 180712, | 3082.4377, | 13419,   | 178632, | 3080.0845, |
| 7.709009 |         |            | 7.703129 |         |            | 7.697248 |         |            |
| 13344,   | 182492, | 3084.7290, | 13382,   | 180056, | 3082.3758, | 13420,   | 179024, | 3080.0226, |
| 7.708855 |         |            | 7.702974 |         |            | 7.697093 |         |            |
| 13345,   | 182736, | 3084.6671, | 13383,   | 179644, | 3082.3139, | 13421,   | 179802, | 3079.9607, |
| 7.708700 |         |            | 7.702819 |         |            | 7.696938 |         |            |
| 13346,   | 183236, | 3084.6052, | 13384,   | 179568, | 3082.2520, | 13422,   | 180608, | 3079.8987, |
| 7.708545 |         |            | 7.702664 |         |            | 7.696784 |         |            |

|          |         |            |          |         |            |          |         |            |
|----------|---------|------------|----------|---------|------------|----------|---------|------------|
| 13423,   | 181020, | 3079.8368, | 13461,   | 181550, | 3077.4836, | 13499,   | 181442, | 3075.1304, |
| 7.696629 |         |            | 7.690748 |         |            | 7.684867 |         |            |
| 13424,   | 181014, | 3079.7749, | 13462,   | 181616, | 3077.4217, | 13500,   | 181316, | 3075.0684, |
| 7.696474 |         |            | 7.690593 |         |            | 7.684712 |         |            |
| 13425,   | 180988, | 3079.7130, | 13463,   | 181370, | 3077.3597, | 13501,   | 180864, | 3075.0065, |
| 7.696319 |         |            | 7.690439 |         |            | 7.684558 |         |            |
| 13426,   | 181270, | 3079.6510, | 13464,   | 181070, | 3077.2978, | 13502,   | 180506, | 3074.9446, |
| 7.696165 |         |            | 7.690284 |         |            | 7.684403 |         |            |
| 13427,   | 181672, | 3079.5891, | 13465,   | 180914, | 3077.2359, | 13503,   | 180490, | 3074.8827, |
| 7.696010 |         |            | 7.690129 |         |            | 7.684248 |         |            |
| 13428,   | 181658, | 3079.5272, | 13466,   | 180880, | 3077.1740, | 13504,   | 180780, | 3074.8207, |
| 7.695855 |         |            | 7.689974 |         |            | 7.684093 |         |            |
| 13429,   | 180954, | 3079.4652, | 13467,   | 180864, | 3077.1120, | 13505,   | 181214, | 3074.7588, |
| 7.695700 |         |            | 7.689819 |         |            | 7.683939 |         |            |
| 13430,   | 179970, | 3079.4033, | 13468,   | 180880, | 3077.0501, | 13506,   | 181748, | 3074.6969, |
| 7.695546 |         |            | 7.689665 |         |            | 7.683784 |         |            |
| 13431,   | 179494, | 3079.3414, | 13469,   | 181018, | 3076.9882, | 13507,   | 182428, | 3074.6349, |
| 7.695391 |         |            | 7.689510 |         |            | 7.683629 |         |            |
| 13432,   | 180002, | 3079.2795, | 13470,   | 181262, | 3076.9262, | 13508,   | 183170, | 3074.5730, |
| 7.695236 |         |            | 7.689355 |         |            | 7.683474 |         |            |
| 13433,   | 181220, | 3079.2175, | 13471,   | 181382, | 3076.8643, | 13509,   | 183658, | 3074.5111, |
| 7.695081 |         |            | 7.689200 |         |            | 7.683320 |         |            |
| 13434,   | 182434, | 3079.1556, | 13472,   | 181162, | 3076.8024, | 13510,   | 183578, | 3074.4492, |
| 7.694926 |         |            | 7.689046 |         |            | 7.683165 |         |            |
| 13435,   | 183162, | 3079.0937, | 13473,   | 180644, | 3076.7405, | 13511,   | 182894, | 3074.3872, |
| 7.694772 |         |            | 7.688891 |         |            | 7.683010 |         |            |
| 13436,   | 183482, | 3079.0318, | 13474,   | 180156, | 3076.6785, | 13512,   | 181950, | 3074.3253, |
| 7.694617 |         |            | 7.688736 |         |            | 7.682855 |         |            |
| 13437,   | 183716, | 3078.9698, | 13475,   | 179998, | 3076.6166, | 13513,   | 181192, | 3074.2634, |
| 7.694462 |         |            | 7.688581 |         |            | 7.682701 |         |            |
| 13438,   | 183938, | 3078.9079, | 13476,   | 180184, | 3076.5547, | 13514,   | 180872, | 3074.2015, |
| 7.694307 |         |            | 7.688427 |         |            | 7.682546 |         |            |
| 13439,   | 183912, | 3078.8460, | 13477,   | 180496, | 3076.4928, | 13515,   | 180960, | 3074.1395, |
| 7.694153 |         |            | 7.688272 |         |            | 7.682391 |         |            |
| 13440,   | 183438, | 3078.7841, | 13478,   | 180782, | 3076.4308, | 13516,   | 181302, | 3074.0776, |
| 7.693998 |         |            | 7.688117 |         |            | 7.682236 |         |            |
| 13441,   | 182742, | 3078.7221, | 13479,   | 181122, | 3076.3689, | 13517,   | 181792, | 3074.0157, |
| 7.693843 |         |            | 7.687962 |         |            | 7.682082 |         |            |
| 13442,   | 182302, | 3078.6602, | 13480,   | 181650, | 3076.3070, | 13518,   | 182342, | 3073.9538, |
| 7.693688 |         |            | 7.687808 |         |            | 7.681927 |         |            |
| 13443,   | 182372, | 3078.5983, | 13481,   | 182296, | 3076.2450, | 13519,   | 182776, | 3073.8918, |
| 7.693534 |         |            | 7.687653 |         |            | 7.681772 |         |            |
| 13444,   | 182704, | 3078.5363, | 13482,   | 182806, | 3076.1831, | 13520,   | 182894, | 3073.8299, |
| 7.693379 |         |            | 7.687498 |         |            | 7.681617 |         |            |
| 13445,   | 182802, | 3078.4744, | 13483,   | 183000, | 3076.1212, | 13521,   | 182660, | 3073.7680, |
| 7.693224 |         |            | 7.687343 |         |            | 7.681463 |         |            |
| 13446,   | 182406, | 3078.4125, | 13484,   | 183056, | 3076.0593, | 13522,   | 182324, | 3073.7060, |
| 7.693069 |         |            | 7.687189 |         |            | 7.681308 |         |            |
| 13447,   | 181682, | 3078.3506, | 13485,   | 183326, | 3075.9973, | 13523,   | 182240, | 3073.6441, |
| 7.692915 |         |            | 7.687034 |         |            | 7.681153 |         |            |
| 13448,   | 180998, | 3078.2886, | 13486,   | 183908, | 3075.9354, | 13524,   | 182502, | 3073.5822, |
| 7.692760 |         |            | 7.686879 |         |            | 7.680998 |         |            |
| 13449,   | 180544, | 3078.2267, | 13487,   | 184430, | 3075.8735, | 13525,   | 182832, | 3073.5203, |
| 7.692605 |         |            | 7.686724 |         |            | 7.680844 |         |            |
| 13450,   | 180276, | 3078.1648, | 13488,   | 184340, | 3075.8116, | 13526,   | 182766, | 3073.4583, |
| 7.692450 |         |            | 7.686570 |         |            | 7.680689 |         |            |
| 13451,   | 180174, | 3078.1029, | 13489,   | 183430, | 3075.7496, | 13527,   | 182098, | 3073.3964, |
| 7.692296 |         |            | 7.686415 |         |            | 7.680534 |         |            |
| 13452,   | 180390, | 3078.0409, | 13490,   | 182058, | 3075.6877, | 13528,   | 181044, | 3073.3345, |
| 7.692141 |         |            | 7.686260 |         |            | 7.680379 |         |            |
| 13453,   | 181052, | 3077.9790, | 13491,   | 180834, | 3075.6258, | 13529,   | 180064, | 3073.2726, |
| 7.691986 |         |            | 7.686105 |         |            | 7.680225 |         |            |
| 13454,   | 181946, | 3077.9171, | 13492,   | 180106, | 3075.5639, | 13530,   | 179508, | 3073.2106, |
| 7.691831 |         |            | 7.685951 |         |            | 7.680070 |         |            |
| 13455,   | 182572, | 3077.8551, | 13493,   | 179780, | 3075.5019, | 13531,   | 179466, | 3073.1487, |
| 7.691677 |         |            | 7.685796 |         |            | 7.679915 |         |            |
| 13456,   | 182506, | 3077.7932, | 13494,   | 179604, | 3075.4400, | 13532,   | 179856, | 3073.0868, |
| 7.691522 |         |            | 7.685641 |         |            | 7.679760 |         |            |
| 13457,   | 181852, | 3077.7313, | 13495,   | 179528, | 3075.3781, | 13533,   | 180558, | 3073.0248, |
| 7.691367 |         |            | 7.685486 |         |            | 7.679605 |         |            |
| 13458,   | 181158, | 3077.6694, | 13496,   | 179738, | 3075.3161, | 13534,   | 181446, | 3072.9629, |
| 7.691212 |         |            | 7.685332 |         |            | 7.679451 |         |            |
| 13459,   | 180932, | 3077.6074, | 13497,   | 180324, | 3075.2542, | 13535,   | 182310, | 3072.9010, |
| 7.691058 |         |            | 7.685177 |         |            | 7.679296 |         |            |
| 13460,   | 181198, | 3077.5455, | 13498,   | 181038, | 3075.1923, | 13536,   | 182862, | 3072.8391, |
| 7.690903 |         |            | 7.685022 |         |            | 7.679141 |         |            |

|          |         |            |          |         |            |          |         |            |
|----------|---------|------------|----------|---------|------------|----------|---------|------------|
| 13537,   | 182952, | 3072.7771, | 13575,   | 182528, | 3070.4239, | 13613,   | 183248, | 3068.0707, |
| 7.678986 |         |            | 7.673106 |         |            | 7.667225 |         |            |
| 13538,   | 182672, | 3072.7152, | 13576,   | 182060, | 3070.3620, | 13614,   | 183798, | 3068.0088, |
| 7.678832 |         |            | 7.672951 |         |            | 7.667070 |         |            |
| 13539,   | 182294, | 3072.6533, | 13577,   | 181836, | 3070.3001, | 13615,   | 184402, | 3067.9468, |
| 7.678677 |         |            | 7.672796 |         |            | 7.666915 |         |            |
| 13540,   | 182018, | 3072.5914, | 13578,   | 182194, | 3070.2381, | 13616,   | 185020, | 3067.8849, |
| 7.678522 |         |            | 7.672641 |         |            | 7.666761 |         |            |
| 13541,   | 181830, | 3072.5294, | 13579,   | 182928, | 3070.1762, | 13617,   | 185302, | 3067.8230, |
| 7.678367 |         |            | 7.672487 |         |            | 7.666606 |         |            |
| 13542,   | 181612, | 3072.4675, | 13580,   | 183530, | 3070.1143, | 13618,   | 184902, | 3067.7611, |
| 7.678213 |         |            | 7.672332 |         |            | 7.666451 |         |            |
| 13543,   | 181352, | 3072.4056, | 13581,   | 183664, | 3070.0524, | 13619,   | 183866, | 3067.6991, |
| 7.678058 |         |            | 7.672177 |         |            | 7.666296 |         |            |
| 13544,   | 181184, | 3072.3437, | 13582,   | 183410, | 3069.9904, | 13620,   | 182716, | 3067.6372, |
| 7.677903 |         |            | 7.672022 |         |            | 7.666142 |         |            |
| 13545,   | 181244, | 3072.2817, | 13583,   | 183006, | 3069.9285, | 13621,   | 182012, | 3067.5753, |
| 7.677748 |         |            | 7.671868 |         |            | 7.665987 |         |            |
| 13546,   | 181454, | 3072.2198, | 13584,   | 182566, | 3069.8666, | 13622,   | 181898, | 3067.5134, |
| 7.677594 |         |            | 7.671713 |         |            | 7.665832 |         |            |
| 13547,   | 181610, | 3072.1579, | 13585,   | 182054, | 3069.8047, | 13623,   | 182050, | 3067.4514, |
| 7.677439 |         |            | 7.671558 |         |            | 7.665677 |         |            |
| 13548,   | 181580, | 3072.0959, | 13586,   | 181552, | 3069.7427, | 13624,   | 182098, | 3067.3895, |
| 7.677284 |         |            | 7.671403 |         |            | 7.665523 |         |            |
| 13549,   | 181436, | 3072.0340, | 13587,   | 181376, | 3069.6808, | 13625,   | 181968, | 3067.3276, |
| 7.677129 |         |            | 7.671249 |         |            | 7.665368 |         |            |
| 13550,   | 181328, | 3071.9721, | 13588,   | 181820, | 3069.6189, | 13626,   | 181830, | 3067.2656, |
| 7.676975 |         |            | 7.671094 |         |            | 7.665213 |         |            |
| 13551,   | 181290, | 3071.9102, | 13589,   | 182778, | 3069.5569, | 13627,   | 181736, | 3067.2037, |
| 7.676820 |         |            | 7.670939 |         |            | 7.665058 |         |            |
| 13552,   | 181202, | 3071.8482, | 13590,   | 183708, | 3069.4950, | 13628,   | 181430, | 3067.1418, |
| 7.676665 |         |            | 7.670784 |         |            | 7.664903 |         |            |
| 13553,   | 180994, | 3071.7863, | 13591,   | 184096, | 3069.4331, | 13629,   | 180632, | 3067.0799, |
| 7.676510 |         |            | 7.670630 |         |            | 7.664749 |         |            |
| 13554,   | 180814, | 3071.7244, | 13592,   | 183926, | 3069.3712, | 13630,   | 179410, | 3067.0179, |
| 7.676356 |         |            | 7.670475 |         |            | 7.664594 |         |            |
| 13555,   | 180900, | 3071.6625, | 13593,   | 183682, | 3069.3092, | 13631,   | 178252, | 3066.9560, |
| 7.676201 |         |            | 7.670320 |         |            | 7.664439 |         |            |
| 13556,   | 181316, | 3071.6005, | 13594,   | 183820, | 3069.2473, | 13632,   | 177670, | 3066.8941, |
| 7.676046 |         |            | 7.670165 |         |            | 7.664284 |         |            |
| 13557,   | 181780, | 3071.5386, | 13595,   | 184330, | 3069.1854, | 13633,   | 177800, | 3066.8322, |
| 7.675891 |         |            | 7.670010 |         |            | 7.664130 |         |            |
| 13558,   | 181950, | 3071.4767, | 13596,   | 184762, | 3069.1235, | 13634,   | 178342, | 3066.7702, |
| 7.675737 |         |            | 7.669856 |         |            | 7.663975 |         |            |
| 13559,   | 181746, | 3071.4147, | 13597,   | 184734, | 3069.0615, | 13635,   | 178930, | 3066.7083, |
| 7.675582 |         |            | 7.669701 |         |            | 7.663820 |         |            |
| 13560,   | 181444, | 3071.3528, | 13598,   | 184304, | 3068.9996, | 13636,   | 179454, | 3066.6464, |
| 7.675427 |         |            | 7.669546 |         |            | 7.663665 |         |            |
| 13561,   | 181386, | 3071.2909, | 13599,   | 183816, | 3068.9377, | 13637,   | 180010, | 3066.5845, |
| 7.675272 |         |            | 7.669391 |         |            | 7.663511 |         |            |
| 13562,   | 181604, | 3071.2290, | 13600,   | 183508, | 3068.8757, | 13638,   | 180638, | 3066.5225, |
| 7.675118 |         |            | 7.669237 |         |            | 7.663356 |         |            |
| 13563,   | 181810, | 3071.1670, | 13601,   | 183294, | 3068.8138, | 13639,   | 181158, | 3066.4606, |
| 7.674963 |         |            | 7.669082 |         |            | 7.663201 |         |            |
| 13564,   | 181760, | 3071.1051, | 13602,   | 182980, | 3068.7519, | 13640,   | 181352, | 3066.3987, |
| 7.674808 |         |            | 7.668927 |         |            | 7.663046 |         |            |
| 13565,   | 181534, | 3071.0432, | 13603,   | 182590, | 3068.6900, | 13641,   | 181194, | 3066.3367, |
| 7.674653 |         |            | 7.668772 |         |            | 7.662892 |         |            |
| 13566,   | 181424, | 3070.9813, | 13604,   | 182378, | 3068.6280, | 13642,   | 180868, | 3066.2748, |
| 7.674498 |         |            | 7.668618 |         |            | 7.662737 |         |            |
| 13567,   | 181570, | 3070.9193, | 13605,   | 182484, | 3068.5661, | 13643,   | 180528, | 3066.2129, |
| 7.674344 |         |            | 7.668463 |         |            | 7.662582 |         |            |
| 13568,   | 181792, | 3070.8574, | 13606,   | 182708, | 3068.5042, | 13644,   | 180168, | 3066.1510, |
| 7.674189 |         |            | 7.668308 |         |            | 7.662427 |         |            |
| 13569,   | 181808, | 3070.7955, | 13607,   | 182680, | 3068.4423, | 13645,   | 179704, | 3066.0890, |
| 7.674034 |         |            | 7.668153 |         |            | 7.662273 |         |            |
| 13570,   | 181616, | 3070.7336, | 13608,   | 182284, | 3068.3803, | 13646,   | 179240, | 3066.0271, |
| 7.673879 |         |            | 7.667999 |         |            | 7.662118 |         |            |
| 13571,   | 181536, | 3070.6716, | 13609,   | 181808, | 3068.3184, | 13647,   | 179044, | 3065.9652, |
| 7.673725 |         |            | 7.667844 |         |            | 7.661963 |         |            |
| 13572,   | 181834, | 3070.6097, | 13610,   | 181674, | 3068.2565, | 13648,   | 179296, | 3065.9033, |
| 7.673570 |         |            | 7.667689 |         |            | 7.661808 |         |            |
| 13573,   | 182380, | 3070.5478, | 13611,   | 182022, | 3068.1946, | 13649,   | 179814, | 3065.8413, |
| 7.673415 |         |            | 7.667534 |         |            | 7.661654 |         |            |
| 13574,   | 182708, | 3070.4858, | 13612,   | 182644, | 3068.1326, | 13650,   | 180158, | 3065.7794, |
| 7.673260 |         |            | 7.667380 |         |            | 7.661499 |         |            |

|          |         |            |          |         |            |          |         |            |
|----------|---------|------------|----------|---------|------------|----------|---------|------------|
| 13651,   | 180056, | 3065.7175, | 13689,   | 180730, | 3063.3643, | 13727,   | 181852, | 3061.0110, |
| 7.661344 |         |            | 7.655463 |         |            | 7.649582 |         |            |
| 13652,   | 179672, | 3065.6555, | 13690,   | 180880, | 3063.3023, | 13728,   | 182136, | 3060.9491, |
| 7.661189 |         |            | 7.655309 |         |            | 7.649428 |         |            |
| 13653,   | 179484, | 3065.5936, | 13691,   | 181172, | 3063.2404, | 13729,   | 182924, | 3060.8872, |
| 7.661035 |         |            | 7.655154 |         |            | 7.649273 |         |            |
| 13654,   | 179812, | 3065.5317, | 13692,   | 181610, | 3063.1785, | 13730,   | 183802, | 3060.8252, |
| 7.660880 |         |            | 7.654999 |         |            | 7.649118 |         |            |
| 13655,   | 180584, | 3065.4698, | 13693,   | 181978, | 3063.1165, | 13731,   | 184170, | 3060.7633, |
| 7.660725 |         |            | 7.654844 |         |            | 7.648963 |         |            |
| 13656,   | 181432, | 3065.4078, | 13694,   | 182012, | 3063.0546, | 13732,   | 183792, | 3060.7014, |
| 7.660570 |         |            | 7.654689 |         |            | 7.648809 |         |            |
| 13657,   | 182084, | 3065.3459, | 13695,   | 181774, | 3062.9927, | 13733,   | 183050, | 3060.6395, |
| 7.660416 |         |            | 7.654535 |         |            | 7.648654 |         |            |
| 13658,   | 182506, | 3065.2840, | 13696,   | 181634, | 3062.9308, | 13734,   | 182622, | 3060.5775, |
| 7.660261 |         |            | 7.654380 |         |            | 7.648499 |         |            |
| 13659,   | 182790, | 3065.2221, | 13697,   | 181938, | 3062.8688, | 13735,   | 182842, | 3060.5156, |
| 7.660106 |         |            | 7.654225 |         |            | 7.648344 |         |            |
| 13660,   | 182964, | 3065.1601, | 13698,   | 182634, | 3062.8069, | 13736,   | 183422, | 3060.4537, |
| 7.659951 |         |            | 7.654070 |         |            | 7.648190 |         |            |
| 13661,   | 182972, | 3065.0982, | 13699,   | 183312, | 3062.7450, | 13737,   | 183814, | 3060.3918, |
| 7.659796 |         |            | 7.653916 |         |            | 7.648035 |         |            |
| 13662,   | 182860, | 3065.0363, | 13700,   | 183634, | 3062.6831, | 13738,   | 183762, | 3060.3298, |
| 7.659642 |         |            | 7.653761 |         |            | 7.647880 |         |            |
| 13663,   | 182792, | 3064.9744, | 13701,   | 183624, | 3062.6211, | 13739,   | 183498, | 3060.2679, |
| 7.659487 |         |            | 7.653606 |         |            | 7.647725 |         |            |
| 13664,   | 182898, | 3064.9124, | 13702,   | 183574, | 3062.5592, | 13740,   | 183352, | 3060.2060, |
| 7.659332 |         |            | 7.653451 |         |            | 7.647571 |         |            |
| 13665,   | 183100, | 3064.8505, | 13703,   | 183692, | 3062.4973, | 13741,   | 183314, | 3060.1441, |
| 7.659177 |         |            | 7.653297 |         |            | 7.647416 |         |            |
| 13666,   | 183184, | 3064.7886, | 13704,   | 183870, | 3062.4353, | 13742,   | 183064, | 3060.0821, |
| 7.659023 |         |            | 7.653142 |         |            | 7.647261 |         |            |
| 13667,   | 183090, | 3064.7266, | 13705,   | 183862, | 3062.3734, | 13743,   | 182426, | 3060.0202, |
| 7.658868 |         |            | 7.652987 |         |            | 7.647106 |         |            |
| 13668,   | 183068, | 3064.6647, | 13706,   | 183588, | 3062.3115, | 13744,   | 181704, | 3059.9583, |
| 7.658713 |         |            | 7.652832 |         |            | 7.646952 |         |            |
| 13669,   | 183418, | 3064.6028, | 13707,   | 183236, | 3062.2496, | 13745,   | 181430, | 3059.8963, |
| 7.658558 |         |            | 7.652678 |         |            | 7.646797 |         |            |
| 13670,   | 184110, | 3064.5409, | 13708,   | 183034, | 3062.1876, | 13746,   | 181798, | 3059.8344, |
| 7.658404 |         |            | 7.652523 |         |            | 7.646642 |         |            |
| 13671,   | 184732, | 3064.4789, | 13709,   | 183044, | 3062.1257, | 13747,   | 182392, | 3059.7725, |
| 7.658249 |         |            | 7.652368 |         |            | 7.646487 |         |            |
| 13672,   | 184864, | 3064.4170, | 13710,   | 183138, | 3062.0638, | 13748,   | 182556, | 3059.7106, |
| 7.658094 |         |            | 7.652213 |         |            | 7.646333 |         |            |
| 13673,   | 184532, | 3064.3551, | 13711,   | 183200, | 3062.0019, | 13749,   | 182066, | 3059.6486, |
| 7.657939 |         |            | 7.652059 |         |            | 7.646178 |         |            |
| 13674,   | 184230, | 3064.2932, | 13712,   | 183214, | 3061.9399, | 13750,   | 181370, | 3059.5867, |
| 7.657785 |         |            | 7.651904 |         |            | 7.646023 |         |            |
| 13675,   | 184390, | 3064.2312, | 13713,   | 183176, | 3061.8780, | 13751,   | 181158, | 3059.5248, |
| 7.657630 |         |            | 7.651749 |         |            | 7.645868 |         |            |
| 13676,   | 184920, | 3064.1693, | 13714,   | 182984, | 3061.8161, | 13752,   | 181724, | 3059.4629, |
| 7.657475 |         |            | 7.651594 |         |            | 7.645714 |         |            |
| 13677,   | 185280, | 3064.1074, | 13715,   | 182490, | 3061.7542, | 13753,   | 182754, | 3059.4009, |
| 7.657320 |         |            | 7.651440 |         |            | 7.645559 |         |            |
| 13678,   | 185054, | 3064.0454, | 13716,   | 181722, | 3061.6922, | 13754,   | 183670, | 3059.3390, |
| 7.657166 |         |            | 7.651285 |         |            | 7.645404 |         |            |
| 13679,   | 184372, | 3063.9835, | 13717,   | 180988, | 3061.6303, | 13755,   | 184126, | 3059.2771, |
| 7.657011 |         |            | 7.651130 |         |            | 7.645249 |         |            |
| 13680,   | 183776, | 3063.9216, | 13718,   | 180660, | 3061.5684, | 13756,   | 184148, | 3059.2151, |
| 7.656856 |         |            | 7.650975 |         |            | 7.645095 |         |            |
| 13681,   | 183618, | 3063.8597, | 13719,   | 180878, | 3061.5064, | 13757,   | 183924, | 3059.1532, |
| 7.656701 |         |            | 7.650821 |         |            | 7.644940 |         |            |
| 13682,   | 183694, | 3063.7977, | 13720,   | 181444, | 3061.4445, | 13758,   | 183564, | 3059.0913, |
| 7.656547 |         |            | 7.650666 |         |            | 7.644785 |         |            |
| 13683,   | 183484, | 3063.7358, | 13721,   | 182024, | 3061.3826, | 13759,   | 183154, | 3059.0294, |
| 7.656392 |         |            | 7.650511 |         |            | 7.644630 |         |            |
| 13684,   | 182728, | 3063.6739, | 13722,   | 182396, | 3061.3207, | 13760,   | 182884, | 3058.9674, |
| 7.656237 |         |            | 7.650356 |         |            | 7.644475 |         |            |
| 13685,   | 181688, | 3063.6120, | 13723,   | 182558, | 3061.2587, | 13761,   | 182992, | 3058.9055, |
| 7.656082 |         |            | 7.650202 |         |            | 7.644321 |         |            |
| 13686,   | 180880, | 3063.5500, | 13724,   | 182544, | 3061.1968, | 13762,   | 183504, | 3058.8436, |
| 7.655928 |         |            | 7.650047 |         |            | 7.644166 |         |            |
| 13687,   | 180564, | 3063.4881, | 13725,   | 182344, | 3061.1349, | 13763,   | 184098, | 3058.7817, |
| 7.655773 |         |            | 7.649892 |         |            | 7.644011 |         |            |
| 13688,   | 180604, | 3063.4262, | 13726,   | 182032, | 3061.0730, | 13764,   | 184346, | 3058.7197, |
| 7.655618 |         |            | 7.649737 |         |            | 7.643856 |         |            |

|          |         |            |          |         |            |          |         |            |
|----------|---------|------------|----------|---------|------------|----------|---------|------------|
| 13765,   | 184128, | 3058.6578, | 13803,   | 180488, | 3056.3046, | 13841,   | 182650, | 3053.9514, |
| 7.643702 |         |            | 7.637821 |         |            | 7.631940 |         |            |
| 13766,   | 183778, | 3058.5959, | 13804,   | 180718, | 3056.2427, | 13842,   | 182562, | 3053.8894, |
| 7.643547 |         |            | 7.637666 |         |            | 7.631785 |         |            |
| 13767,   | 183714, | 3058.5340, | 13805,   | 181300, | 3056.1807, | 13843,   | 183326, | 3053.8275, |
| 7.643392 |         |            | 7.637511 |         |            | 7.631631 |         |            |
| 13768,   | 183962, | 3058.4720, | 13806,   | 182098, | 3056.1188, | 13844,   | 184584, | 3053.7656, |
| 7.64237  |         |            | 7.637357 |         |            | 7.631476 |         |            |
| 13769,   | 184112, | 3058.4101, | 13807,   | 182678, | 3056.0569, | 13845,   | 185642, | 3053.7037, |
| 7.643083 |         |            | 7.637202 |         |            | 7.631321 |         |            |
| 13770,   | 183720, | 3058.3482, | 13808,   | 182722, | 3055.9950, | 13846,   | 186002, | 3053.6417, |
| 7.642928 |         |            | 7.637047 |         |            | 7.631166 |         |            |
| 13771,   | 182804, | 3058.2862, | 13809,   | 182350, | 3055.9330, | 13847,   | 185670, | 3053.5798, |
| 7.642773 |         |            | 7.636892 |         |            | 7.631012 |         |            |
| 13772,   | 181864, | 3058.2243, | 13810,   | 182022, | 3055.8711, | 13848,   | 185034, | 3053.5179, |
| 7.642618 |         |            | 7.636738 |         |            | 7.630857 |         |            |
| 13773,   | 181436, | 3058.1624, | 13811,   | 182084, | 3055.8092, | 13849,   | 184440, | 3053.4559, |
| 7.642464 |         |            | 7.636583 |         |            | 7.630702 |         |            |
| 13774,   | 181638, | 3058.1005, | 13812,   | 182404, | 3055.7472, | 13850,   | 183936, | 3053.3940, |
| 7.642309 |         |            | 7.636428 |         |            | 7.630547 |         |            |
| 13775,   | 182152, | 3058.0385, | 13813,   | 182578, | 3055.6853, | 13851,   | 183404, | 3053.3321, |
| 7.642154 |         |            | 7.636273 |         |            | 7.630393 |         |            |
| 13776,   | 182624, | 3057.9766, | 13814,   | 182340, | 3055.6234, | 13852,   | 182840, | 3053.2702, |
| 7.641999 |         |            | 7.636119 |         |            | 7.630238 |         |            |
| 13777,   | 182936, | 3057.9147, | 13815,   | 181844, | 3055.5615, | 13853,   | 182432, | 3053.2082, |
| 7.641845 |         |            | 7.635964 |         |            | 7.630083 |         |            |
| 13778,   | 183148, | 3057.8528, | 13816,   | 181468, | 3055.4995, | 13854,   | 182326, | 3053.1463, |
| 7.641690 |         |            | 7.635809 |         |            | 7.629928 |         |            |
| 13779,   | 183274, | 3057.7908, | 13817,   | 181410, | 3055.4376, | 13855,   | 182440, | 3053.0844, |
| 7.641535 |         |            | 7.635654 |         |            | 7.629774 |         |            |
| 13780,   | 183226, | 3057.7289, | 13818,   | 181536, | 3055.3757, | 13856,   | 182518, | 3053.0225, |
| 7.641380 |         |            | 7.635500 |         |            | 7.629619 |         |            |
| 13781,   | 182978, | 3057.6670, | 13819,   | 181606, | 3055.3138, | 13857,   | 182406, | 3052.9605, |
| 7.641226 |         |            | 7.635345 |         |            | 7.629464 |         |            |
| 13782,   | 182728, | 3057.6050, | 13820,   | 181600, | 3055.2518, | 13858,   | 182192, | 3052.8986, |
| 7.641071 |         |            | 7.635190 |         |            | 7.629309 |         |            |
| 13783,   | 182720, | 3057.5431, | 13821,   | 181694, | 3055.1899, | 13859,   | 182056, | 3052.8367, |
| 7.640916 |         |            | 7.635035 |         |            | 7.629154 |         |            |
| 13784,   | 182948, | 3057.4812, | 13822,   | 182014, | 3055.1280, | 13860,   | 182006, | 3052.7748, |
| 7.640761 |         |            | 7.634881 |         |            | 7.629000 |         |            |
| 13785,   | 183084, | 3057.4193, | 13823,   | 182414, | 3055.0660, | 13861,   | 181864, | 3052.7128, |
| 7.640607 |         |            | 7.634726 |         |            | 7.628845 |         |            |
| 13786,   | 182810, | 3057.3573, | 13824,   | 182588, | 3055.0041, | 13862,   | 181522, | 3052.6509, |
| 7.640452 |         |            | 7.634571 |         |            | 7.628690 |         |            |
| 13787,   | 182178, | 3057.2954, | 13825,   | 182374, | 3054.9422, | 13863,   | 181136, | 3052.5890, |
| 7.640297 |         |            | 7.634416 |         |            | 7.628535 |         |            |
| 13788,   | 181630, | 3057.2335, | 13826,   | 181920, | 3054.8803, | 13864,   | 181052, | 3052.5270, |
| 7.640142 |         |            | 7.634261 |         |            | 7.628381 |         |            |
| 13789,   | 181560, | 3057.1716, | 13827,   | 181536, | 3054.8183, | 13865,   | 181422, | 3052.4651, |
| 7.639988 |         |            | 7.634107 |         |            | 7.628226 |         |            |
| 13790,   | 181908, | 3057.1096, | 13828,   | 181390, | 3054.7564, | 13866,   | 182024, | 3052.4032, |
| 7.639833 |         |            | 7.633952 |         |            | 7.628071 |         |            |
| 13791,   | 182242, | 3057.0477, | 13829,   | 181444, | 3054.6945, | 13867,   | 182464, | 3052.3413, |
| 7.639678 |         |            | 7.633797 |         |            | 7.627916 |         |            |
| 13792,   | 182178, | 3056.9858, | 13830,   | 181580, | 3054.6326, | 13868,   | 182584, | 3052.2793, |
| 7.639523 |         |            | 7.633642 |         |            | 7.627762 |         |            |
| 13793,   | 181748, | 3056.9239, | 13831,   | 181794, | 3054.5706, | 13869,   | 182634, | 3052.2174, |
| 7.639368 |         |            | 7.633488 |         |            | 7.627607 |         |            |
| 13794,   | 181308, | 3056.8619, | 13832,   | 182178, | 3054.5087, | 13870,   | 183014, | 3052.1555, |
| 7.639214 |         |            | 7.633333 |         |            | 7.627452 |         |            |
| 13795,   | 181110, | 3056.8000, | 13833,   | 182774, | 3054.4468, | 13871,   | 183830, | 3052.0936, |
| 7.639059 |         |            | 7.633178 |         |            | 7.627297 |         |            |
| 13796,   | 181076, | 3056.7381, | 13834,   | 183488, | 3054.3849, | 13872,   | 184768, | 3052.0316, |
| 7.638904 |         |            | 7.633023 |         |            | 7.627143 |         |            |
| 13797,   | 180954, | 3056.6761, | 13835,   | 184162, | 3054.3229, | 13873,   | 185356, | 3051.9697, |
| 7.638749 |         |            | 7.632869 |         |            | 7.626988 |         |            |
| 13798,   | 180666, | 3056.6142, | 13836,   | 184672, | 3054.2610, | 13874,   | 185356, | 3051.9078, |
| 7.638595 |         |            | 7.632714 |         |            | 7.626833 |         |            |
| 13799,   | 180376, | 3056.5523, | 13837,   | 184922, | 3054.1991, | 13875,   | 184926, | 3051.8458, |
| 7.638440 |         |            | 7.632559 |         |            | 7.626678 |         |            |
| 13800,   | 180274, | 3056.4904, | 13838,   | 184812, | 3054.1371, | 13876,   | 184388, | 3051.7839, |
| 7.638285 |         |            | 7.632404 |         |            | 7.626524 |         |            |
| 13801,   | 180344, | 3056.4284, | 13839,   | 184254, | 3054.0752, | 13877,   | 183988, | 3051.7220, |
| 7.638130 |         |            | 7.632250 |         |            | 7.626369 |         |            |
| 13802,   | 180428, | 3056.3665, | 13840,   | 183388, | 3054.0133, | 13878,   | 183810, | 3051.6601, |
| 7.637976 |         |            | 7.632095 |         |            | 7.626214 |         |            |

|          |         |            |          |         |            |          |         |            |
|----------|---------|------------|----------|---------|------------|----------|---------|------------|
| 13879,   | 183874, | 3051.5981, | 13917,   | 185696, | 3049.2449, | 13955,   | 185060, | 3046.8917, |
| 7.626059 |         |            | 7.620179 |         |            | 7.614298 |         |            |
| 13880,   | 184194, | 3051.5362, | 13918,   | 185682, | 3049.1830, | 13956,   | 184424, | 3046.8298, |
| 7.625905 |         |            | 7.620024 |         |            | 7.614143 |         |            |
| 13881,   | 184758, | 3051.4743, | 13919,   | 185542, | 3049.1211, | 13957,   | 184240, | 3046.7678, |
| 7.625750 |         |            | 7.619869 |         |            | 7.613988 |         |            |
| 13882,   | 185454, | 3051.4124, | 13920,   | 185244, | 3049.0591, | 13958,   | 184486, | 3046.7059, |
| 7.625595 |         |            | 7.619714 |         |            | 7.613833 |         |            |
| 13883,   | 186138, | 3051.3504, | 13921,   | 184648, | 3048.9972, | 13959,   | 184772, | 3046.6440, |
| 7.625440 |         |            | 7.619559 |         |            | 7.613679 |         |            |
| 13884,   | 186744, | 3051.2885, | 13922,   | 183796, | 3048.9353, | 13960,   | 184798, | 3046.5821, |
| 7.625286 |         |            | 7.619405 |         |            | 7.613524 |         |            |
| 13885,   | 187314, | 3051.2266, | 13923,   | 182958, | 3048.8734, | 13961,   | 184646, | 3046.5201, |
| 7.625131 |         |            | 7.619250 |         |            | 7.613369 |         |            |
| 13886,   | 187826, | 3051.1647, | 13924,   | 182424, | 3048.8114, | 13962,   | 184604, | 3046.4582, |
| 7.624976 |         |            | 7.619095 |         |            | 7.613214 |         |            |
| 13887,   | 188114, | 3051.1027, | 13925,   | 182168, | 3048.7495, | 13963,   | 184778, | 3046.3963, |
| 7.624821 |         |            | 7.618940 |         |            | 7.613060 |         |            |
| 13888,   | 187962, | 3051.0408, | 13926,   | 181878, | 3048.6876, | 13964,   | 184966, | 3046.3344, |
| 7.624666 |         |            | 7.618786 |         |            | 7.612905 |         |            |
| 13889,   | 187314, | 3050.9789, | 13927,   | 181300, | 3048.6256, | 13965,   | 184914, | 3046.2724, |
| 7.624512 |         |            | 7.618631 |         |            | 7.612750 |         |            |
| 13890,   | 186408, | 3050.9169, | 13928,   | 180586, | 3048.5637, | 13966,   | 184630, | 3046.2105, |
| 7.624357 |         |            | 7.618476 |         |            | 7.612595 |         |            |
| 13891,   | 185586, | 3050.8550, | 13929,   | 180162, | 3048.5018, | 13967,   | 184372, | 3046.1486, |
| 7.624202 |         |            | 7.618321 |         |            | 7.612441 |         |            |
| 13892,   | 185042, | 3050.7931, | 13930,   | 180310, | 3048.4399, | 13968,   | 184334, | 3046.0866, |
| 7.624047 |         |            | 7.618167 |         |            | 7.612286 |         |            |
| 13893,   | 184724, | 3050.7312, | 13931,   | 180870, | 3048.3779, | 13969,   | 184404, | 3046.0247, |
| 7.623893 |         |            | 7.618012 |         |            | 7.612131 |         |            |
| 13894,   | 184546, | 3050.6692, | 13932,   | 181392, | 3048.3160, | 13970,   | 184294, | 3045.9628, |
| 7.623738 |         |            | 7.617857 |         |            | 7.611976 |         |            |
| 13895,   | 184566, | 3050.6073, | 13933,   | 181566, | 3048.2541, | 13971,   | 183896, | 3045.9009, |
| 7.623583 |         |            | 7.617702 |         |            | 7.611822 |         |            |
| 13896,   | 184930, | 3050.5454, | 13934,   | 181466, | 3048.1922, | 13972,   | 183464, | 3045.8389, |
| 7.623428 |         |            | 7.617548 |         |            | 7.611667 |         |            |
| 13897,   | 185588, | 3050.4835, | 13935,   | 181392, | 3048.1302, | 13973,   | 183372, | 3045.7770, |
| 7.623274 |         |            | 7.617393 |         |            | 7.611512 |         |            |
| 13898,   | 186196, | 3050.4215, | 13936,   | 181534, | 3048.0683, | 13974,   | 183772, | 3045.7151, |
| 7.623119 |         |            | 7.617238 |         |            | 7.611357 |         |            |
| 13899,   | 186336, | 3050.3596, | 13937,   | 181876, | 3048.0064, | 13975,   | 184492, | 3045.6532, |
| 7.622964 |         |            | 7.617083 |         |            | 7.611203 |         |            |
| 13900,   | 185968, | 3050.2977, | 13938,   | 182346, | 3047.9445, | 13976,   | 185254, | 3045.5912, |
| 7.622809 |         |            | 7.616929 |         |            | 7.611048 |         |            |
| 13901,   | 185476, | 3050.2357, | 13939,   | 182964, | 3047.8825, | 13977,   | 185908, | 3045.5293, |
| 7.622655 |         |            | 7.616774 |         |            | 7.610893 |         |            |
| 13902,   | 185328, | 3050.1738, | 13940,   | 183786, | 3047.8206, | 13978,   | 186454, | 3045.4674, |
| 7.622500 |         |            | 7.616619 |         |            | 7.610738 |         |            |
| 13903,   | 185588, | 3050.1119, | 13941,   | 184682, | 3047.7587, | 13979,   | 186852, | 3045.4054, |
| 7.622345 |         |            | 7.616464 |         |            | 7.610584 |         |            |
| 13904,   | 185856, | 3050.0500, | 13942,   | 185336, | 3047.6967, | 13980,   | 186986, | 3045.3435, |
| 7.622190 |         |            | 7.616310 |         |            | 7.610429 |         |            |
| 13905,   | 185716, | 3049.9880, | 13943,   | 185498, | 3047.6348, | 13981,   | 186794, | 3045.2816, |
| 7.622036 |         |            | 7.616155 |         |            | 7.610274 |         |            |
| 13906,   | 185192, | 3049.9261, | 13944,   | 185248, | 3047.5729, | 13982,   | 186440, | 3045.2197, |
| 7.621881 |         |            | 7.616000 |         |            | 7.610119 |         |            |
| 13907,   | 184722, | 3049.8642, | 13945,   | 184926, | 3047.5110, | 13983,   | 186192, | 3045.1577, |
| 7.621726 |         |            | 7.615845 |         |            | 7.609965 |         |            |
| 13908,   | 184690, | 3049.8023, | 13946,   | 184790, | 3047.4490, | 13984,   | 186140, | 3045.0958, |
| 7.621571 |         |            | 7.615691 |         |            | 7.609810 |         |            |
| 13909,   | 184992, | 3049.7403, | 13947,   | 184786, | 3047.3871, | 13985,   | 186084, | 3045.0339, |
| 7.621417 |         |            | 7.615536 |         |            | 7.609655 |         |            |
| 13910,   | 185162, | 3049.6784, | 13948,   | 184686, | 3047.3252, | 13986,   | 185772, | 3044.9720, |
| 7.621262 |         |            | 7.615381 |         |            | 7.609500 |         |            |
| 13911,   | 184886, | 3049.6165, | 13949,   | 184458, | 3047.2633, | 13987,   | 185294, | 3044.9100, |
| 7.621107 |         |            | 7.615226 |         |            | 7.609345 |         |            |
| 13912,   | 184356, | 3049.5546, | 13950,   | 184380, | 3047.2013, | 13988,   | 185114, | 3044.8481, |
| 7.620952 |         |            | 7.615072 |         |            | 7.609191 |         |            |
| 13913,   | 184054, | 3049.4926, | 13951,   | 184718, | 3047.1394, | 13989,   | 185672, | 3044.7862, |
| 7.620798 |         |            | 7.614917 |         |            | 7.609036 |         |            |
| 13914,   | 184290, | 3049.4307, | 13952,   | 185362, | 3047.0775, | 13990,   | 186872, | 3044.7243, |
| 7.620643 |         |            | 7.614762 |         |            | 7.608881 |         |            |
| 13915,   | 184892, | 3049.3688, | 13953,   | 185826, | 3047.0155, | 13991,   | 188062, | 3044.6623, |
| 7.620488 |         |            | 7.614607 |         |            | 7.608726 |         |            |
| 13916,   | 185444, | 3049.3068, | 13954,   | 185698, | 3046.9536, | 13992,   | 188536, | 3044.6004, |
| 7.620333 |         |            | 7.614452 |         |            | 7.608572 |         |            |

|          |         |            |          |         |            |          |         |            |
|----------|---------|------------|----------|---------|------------|----------|---------|------------|
| 13993,   | 188094, | 3044.5385, | 14031,   | 184536, | 3042.1853, | 14069,   | 188332, | 3039.8320, |
| 7.608417 |         |            | 7.602536 |         |            | 7.596655 |         |            |
| 13994,   | 187128, | 3044.4765, | 14032,   | 183752, | 3042.1233, | 14070,   | 188144, | 3039.7701, |
| 7.608262 |         |            | 7.602381 |         |            | 7.596501 |         |            |
| 13995,   | 186200, | 3044.4146, | 14033,   | 183538, | 3042.0614, | 14071,   | 188082, | 3039.7082, |
| 7.608107 |         |            | 7.602227 |         |            | 7.596346 |         |            |
| 13996,   | 185544, | 3044.3527, | 14034,   | 183842, | 3041.9995, | 14072,   | 188038, | 3039.6462, |
| 7.607953 |         |            | 7.602072 |         |            | 7.596191 |         |            |
| 13997,   | 185064, | 3044.2908, | 14035,   | 184316, | 3041.9375, | 14073,   | 187792, | 3039.5843, |
| 7.607798 |         |            | 7.601917 |         |            | 7.596036 |         |            |
| 13998,   | 184590, | 3044.2288, | 14036,   | 184718, | 3041.8756, | 14074,   | 187336, | 3039.5224, |
| 7.607643 |         |            | 7.601762 |         |            | 7.595882 |         |            |
| 13999,   | 184190, | 3044.1669, | 14037,   | 185042, | 3041.8137, | 14075,   | 186936, | 3039.4605, |
| 7.607488 |         |            | 7.601608 |         |            | 7.595727 |         |            |
| 14000,   | 184026, | 3044.1050, | 14038,   | 185398, | 3041.7518, | 14076,   | 186830, | 3039.3985, |
| 7.607334 |         |            | 7.601453 |         |            | 7.595572 |         |            |
| 14001,   | 184128, | 3044.0431, | 14039,   | 185770, | 3041.6898, | 14077,   | 186958, | 3039.3366, |
| 7.607179 |         |            | 7.601298 |         |            | 7.595417 |         |            |
| 14002,   | 184260, | 3043.9811, | 14040,   | 186006, | 3041.6279, | 14078,   | 187032, | 3039.2747, |
| 7.607024 |         |            | 7.601143 |         |            | 7.595263 |         |            |
| 14003,   | 184190, | 3043.9192, | 14041,   | 185984, | 3041.5660, | 14079,   | 186820, | 3039.2128, |
| 7.606869 |         |            | 7.600989 |         |            | 7.595108 |         |            |
| 14004,   | 183956, | 3043.8573, | 14042,   | 185764, | 3041.5041, | 14080,   | 186370, | 3039.1508, |
| 7.606715 |         |            | 7.600834 |         |            | 7.594953 |         |            |
| 14005,   | 183860, | 3043.7953, | 14043,   | 185514, | 3041.4421, | 14081,   | 185946, | 3039.0889, |
| 7.606560 |         |            | 7.600679 |         |            | 7.594798 |         |            |
| 14006,   | 184138, | 3043.7334, | 14044,   | 185298, | 3041.3802, | 14082,   | 185760, | 3039.0270, |
| 7.606405 |         |            | 7.600524 |         |            | 7.594644 |         |            |
| 14007,   | 184688, | 3043.6715, | 14045,   | 185024, | 3041.3183, | 14083,   | 185876, | 3038.9651, |
| 7.606250 |         |            | 7.600370 |         |            | 7.594489 |         |            |
| 14008,   | 185142, | 3043.6096, | 14046,   | 184598, | 3041.2563, | 14084,   | 186274, | 3038.9031, |
| 7.606096 |         |            | 7.600215 |         |            | 7.594334 |         |            |
| 14009,   | 185204, | 3043.5476, | 14047,   | 184090, | 3041.1944, | 14085,   | 186938, | 3038.8412, |
| 7.605941 |         |            | 7.600060 |         |            | 7.594179 |         |            |
| 14010,   | 184898, | 3043.4857, | 14048,   | 183716, | 3041.1325, | 14086,   | 187794, | 3038.7793, |
| 7.605786 |         |            | 7.599905 |         |            | 7.594024 |         |            |
| 14011,   | 184480, | 3043.4238, | 14049,   | 183618, | 3041.0706, | 14087,   | 188558, | 3038.7173, |
| 7.605631 |         |            | 7.599751 |         |            | 7.593870 |         |            |
| 14012,   | 184200, | 3043.3619, | 14050,   | 183742, | 3041.0086, | 14088,   | 188834, | 3038.6554, |
| 7.605477 |         |            | 7.599596 |         |            | 7.593715 |         |            |
| 14013,   | 184126, | 3043.2999, | 14051,   | 183946, | 3040.9467, | 14089,   | 188438, | 3038.5935, |
| 7.605322 |         |            | 7.599441 |         |            | 7.593560 |         |            |
| 14014,   | 184224, | 3043.2380, | 14052,   | 184216, | 3040.8848, | 14090,   | 187654, | 3038.5316, |
| 7.605167 |         |            | 7.599286 |         |            | 7.593405 |         |            |
| 14015,   | 184486, | 3043.1761, | 14053,   | 184698, | 3040.8229, | 14091,   | 187108, | 3038.4696, |
| 7.605012 |         |            | 7.599131 |         |            | 7.593251 |         |            |
| 14016,   | 184912, | 3043.1142, | 14054,   | 185488, | 3040.7609, | 14092,   | 187254, | 3038.4077, |
| 7.604858 |         |            | 7.598977 |         |            | 7.593096 |         |            |
| 14017,   | 185442, | 3043.0522, | 14055,   | 186418, | 3040.6990, | 14093,   | 187970, | 3038.3458, |
| 7.604703 |         |            | 7.598822 |         |            | 7.592941 |         |            |
| 14018,   | 185934, | 3042.9903, | 14056,   | 187098, | 3040.6371, | 14094,   | 188644, | 3038.2839, |
| 7.604548 |         |            | 7.598667 |         |            | 7.592786 |         |            |
| 14019,   | 186260, | 3042.9284, | 14057,   | 187246, | 3040.5752, | 14095,   | 188714, | 3038.2219, |
| 7.604393 |         |            | 7.598512 |         |            | 7.592632 |         |            |
| 14020,   | 186432, | 3042.8664, | 14058,   | 186886, | 3040.5132, | 14096,   | 188120, | 3038.1600, |
| 7.604238 |         |            | 7.598358 |         |            | 7.592477 |         |            |
| 14021,   | 186538, | 3042.8045, | 14059,   | 186290, | 3040.4513, | 14097,   | 187282, | 3038.0981, |
| 7.604084 |         |            | 7.598203 |         |            | 7.592322 |         |            |
| 14022,   | 186614, | 3042.7426, | 14060,   | 185686, | 3040.3894, | 14098,   | 186682, | 3038.0361, |
| 7.603929 |         |            | 7.598048 |         |            | 7.592167 |         |            |
| 14023,   | 186566, | 3042.6807, | 14061,   | 185168, | 3040.3274, | 14099,   | 186482, | 3037.9742, |
| 7.603774 |         |            | 7.597893 |         |            | 7.592013 |         |            |
| 14024,   | 186334, | 3042.6187, | 14062,   | 184758, | 3040.2655, | 14100,   | 186530, | 3037.9123, |
| 7.603619 |         |            | 7.597739 |         |            | 7.591858 |         |            |
| 14025,   | 186042, | 3042.5568, | 14063,   | 184634, | 3040.2036, | 14101,   | 186622, | 3037.8504, |
| 7.603465 |         |            | 7.597584 |         |            | 7.591703 |         |            |
| 14026,   | 185932, | 3042.4949, | 14064,   | 185032, | 3040.1417, | 14102,   | 186680, | 3037.7884, |
| 7.603310 |         |            | 7.597429 |         |            | 7.591548 |         |            |
| 14027,   | 186110, | 3042.4330, | 14065,   | 186000, | 3040.0797, | 14103,   | 186674, | 3037.7265, |
| 7.603155 |         |            | 7.597274 |         |            | 7.591394 |         |            |
| 14028,   | 186342, | 3042.3710, | 14066,   | 187200, | 3040.0178, | 14104,   | 186518, | 3037.6646, |
| 7.603000 |         |            | 7.597120 |         |            | 7.591239 |         |            |
| 14029,   | 186212, | 3042.3091, | 14067,   | 188112, | 3039.9559, | 14105,   | 186138, | 3037.6027, |
| 7.602846 |         |            | 7.596965 |         |            | 7.591084 |         |            |
| 14030,   | 185526, | 3042.2472, | 14068,   | 188446, | 3039.8940, | 14106,   | 185634, | 3037.5407, |
| 7.602691 |         |            | 7.596810 |         |            | 7.590929 |         |            |

|          |         |            |          |         |            |          |         |            |
|----------|---------|------------|----------|---------|------------|----------|---------|------------|
| 14107,   | 185298, | 3037.4788, | 14145,   | 186762, | 3035.1256, | 14183,   | 185396, | 3032.7724, |
| 7.590775 |         |            | 7.584894 |         |            | 7.579013 |         |            |
| 14108,   | 185388, | 3037.4169, | 14146,   | 187058, | 3035.0637, | 14184,   | 185986, | 3032.7104, |
| 7.590620 |         |            | 7.584739 |         |            | 7.578858 |         |            |
| 14109,   | 185836, | 3037.3550, | 14147,   | 187240, | 3035.0017, | 14185,   | 186736, | 3032.6485, |
| 7.590465 |         |            | 7.584584 |         |            | 7.578703 |         |            |
| 14110,   | 186248, | 3037.2930, | 14148,   | 187064, | 3034.9398, | 14186,   | 187236, | 3032.5866, |
| 7.590310 |         |            | 7.584430 |         |            | 7.578549 |         |            |
| 14111,   | 186262, | 3037.2311, | 14149,   | 186542, | 3034.8779, | 14187,   | 187278, | 3032.5247, |
| 7.590156 |         |            | 7.584275 |         |            | 7.578394 |         |            |
| 14112,   | 185904, | 3037.1692, | 14150,   | 186060, | 3034.8159, | 14188,   | 187022, | 3032.4627, |
| 7.590001 |         |            | 7.584120 |         |            | 7.578239 |         |            |
| 14113,   | 185540, | 3037.1072, | 14151,   | 186038, | 3034.7540, | 14189,   | 186798, | 3032.4008, |
| 7.589846 |         |            | 7.583965 |         |            | 7.578084 |         |            |
| 14114,   | 185530, | 3037.0453, | 14152,   | 186526, | 3034.6921, | 14190,   | 186768, | 3032.3389, |
| 7.589691 |         |            | 7.583810 |         |            | 7.577930 |         |            |
| 14115,   | 185906, | 3036.9834, | 14153,   | 187106, | 3034.6302, | 14191,   | 186822, | 3032.2769, |
| 7.589537 |         |            | 7.583656 |         |            | 7.577775 |         |            |
| 14116,   | 186398, | 3036.9215, | 14154,   | 187218, | 3034.5682, | 14192,   | 186780, | 3032.2150, |
| 7.589382 |         |            | 7.583501 |         |            | 7.577620 |         |            |
| 14117,   | 186716, | 3036.8595, | 14155,   | 186600, | 3034.5063, | 14193,   | 186616, | 3032.1531, |
| 7.589227 |         |            | 7.583346 |         |            | 7.577465 |         |            |
| 14118,   | 186780, | 3036.7976, | 14156,   | 185462, | 3034.4444, | 14194,   | 186442, | 3032.0912, |
| 7.589072 |         |            | 7.583191 |         |            | 7.577311 |         |            |
| 14119,   | 186618, | 3036.7357, | 14157,   | 184202, | 3034.3825, | 14195,   | 186298, | 3032.0292, |
| 7.588917 |         |            | 7.583037 |         |            | 7.577156 |         |            |
| 14120,   | 186234, | 3036.6738, | 14158,   | 183100, | 3034.3205, | 14196,   | 186074, | 3031.9673, |
| 7.588763 |         |            | 7.582882 |         |            | 7.577001 |         |            |
| 14121,   | 185568, | 3036.6118, | 14159,   | 182194, | 3034.2586, | 14197,   | 185680, | 3031.9054, |
| 7.588608 |         |            | 7.582727 |         |            | 7.576846 |         |            |
| 14122,   | 184704, | 3036.5499, | 14160,   | 181454, | 3034.1967, | 14198,   | 185286, | 3031.8435, |
| 7.588453 |         |            | 7.582572 |         |            | 7.576692 |         |            |
| 14123,   | 183998, | 3036.4880, | 14161,   | 180956, | 3034.1348, | 14199,   | 185248, | 3031.7815, |
| 7.588298 |         |            | 7.582418 |         |            | 7.576537 |         |            |
| 14124,   | 183854, | 3036.4260, | 14162,   | 180824, | 3034.0728, | 14200,   | 185760, | 3031.7196, |
| 7.588144 |         |            | 7.582263 |         |            | 7.576382 |         |            |
| 14125,   | 184382, | 3036.3641, | 14163,   | 181056, | 3034.0109, | 14201,   | 186566, | 3031.6577, |
| 7.587989 |         |            | 7.582108 |         |            | 7.576227 |         |            |
| 14126,   | 185196, | 3036.3022, | 14164,   | 181504, | 3033.9490, | 14202,   | 187122, | 3031.5957, |
| 7.587834 |         |            | 7.581953 |         |            | 7.576073 |         |            |
| 14127,   | 185704, | 3036.2403, | 14165,   | 182038, | 3033.8870, | 14203,   | 187102, | 3031.5338, |
| 7.587679 |         |            | 7.581799 |         |            | 7.575918 |         |            |
| 14128,   | 185566, | 3036.1783, | 14166,   | 182704, | 3033.8251, | 14204,   | 186704, | 3031.4719, |
| 7.587525 |         |            | 7.581644 |         |            | 7.575763 |         |            |
| 14129,   | 184952, | 3036.1164, | 14167,   | 183646, | 3033.7632, | 14205,   | 186450, | 3031.4100, |
| 7.587370 |         |            | 7.581489 |         |            | 7.575608 |         |            |
| 14130,   | 184356, | 3036.0545, | 14168,   | 184840, | 3033.7013, | 14206,   | 186654, | 3031.3480, |
| 7.587215 |         |            | 7.581334 |         |            | 7.575454 |         |            |
| 14131,   | 184194, | 3035.9926, | 14169,   | 185986, | 3033.6393, | 14207,   | 187160, | 3031.2861, |
| 7.587060 |         |            | 7.581180 |         |            | 7.575299 |         |            |
| 14132,   | 184530, | 3035.9306, | 14170,   | 186692, | 3033.5774, | 14208,   | 187594, | 3031.2242, |
| 7.586906 |         |            | 7.581025 |         |            | 7.575144 |         |            |
| 14133,   | 185172, | 3035.8687, | 14171,   | 186788, | 3033.5155, | 14209,   | 187830, | 3031.1623, |
| 7.586751 |         |            | 7.580870 |         |            | 7.574989 |         |            |
| 14134,   | 185872, | 3035.8068, | 14172,   | 186486, | 3033.4536, | 14210,   | 188142, | 3031.1003, |
| 7.586596 |         |            | 7.580715 |         |            | 7.574835 |         |            |
| 14135,   | 186494, | 3035.7449, | 14173,   | 186144, | 3033.3916, | 14211,   | 188826, | 3031.0384, |
| 7.586441 |         |            | 7.580561 |         |            | 7.574680 |         |            |
| 14136,   | 186936, | 3035.6829, | 14174,   | 185982, | 3033.3297, | 14212,   | 189788, | 3030.9765, |
| 7.586287 |         |            | 7.580406 |         |            | 7.574525 |         |            |
| 14137,   | 187142, | 3035.6210, | 14175,   | 185954, | 3033.2678, | 14213,   | 190538, | 3030.9146, |
| 7.586132 |         |            | 7.580251 |         |            | 7.574370 |         |            |
| 14138,   | 187112, | 3035.5591, | 14176,   | 185926, | 3033.2058, | 14214,   | 190634, | 3030.8526, |
| 7.585977 |         |            | 7.580096 |         |            | 7.574215 |         |            |
| 14139,   | 186946, | 3035.4971, | 14177,   | 185856, | 3033.1439, | 14215,   | 190116, | 3030.7907, |
| 7.585822 |         |            | 7.579942 |         |            | 7.574061 |         |            |
| 14140,   | 186784, | 3035.4352, | 14178,   | 185792, | 3033.0820, | 14216,   | 189452, | 3030.7288, |
| 7.585668 |         |            | 7.579787 |         |            | 7.573906 |         |            |
| 14141,   | 186700, | 3035.3733, | 14179,   | 185738, | 3033.0201, | 14217,   | 189056, | 3030.6668, |
| 7.585513 |         |            | 7.579632 |         |            | 7.573751 |         |            |
| 14142,   | 186654, | 3035.3114, | 14180,   | 185612, | 3032.9581, | 14218,   | 188950, | 3030.6049, |
| 7.585358 |         |            | 7.579477 |         |            | 7.573596 |         |            |
| 14143,   | 186604, | 3035.2494, | 14181,   | 185382, | 3032.8962, | 14219,   | 188836, | 3030.5430, |
| 7.585203 |         |            | 7.579322 |         |            | 7.573442 |         |            |
| 14144,   | 186600, | 3035.1875, | 14182,   | 185224, | 3032.8343, | 14220,   | 188486, | 3030.4811, |
| 7.585049 |         |            | 7.579168 |         |            | 7.573287 |         |            |



|          |         |            |          |         |            |          |         |            |
|----------|---------|------------|----------|---------|------------|----------|---------|------------|
| 14221,   | 187944, | 3030.4191, | 14259,   | 186806, | 3028.0659, | 14297,   | 186082, | 3025.7127, |
| 7.573132 |         |            | 7.567251 |         |            | 7.561371 |         |            |
| 14222,   | 187384, | 3030.3572, | 14260,   | 186786, | 3028.0040, | 14298,   | 186324, | 3025.6508, |
| 7.572977 |         |            | 7.567097 |         |            | 7.561216 |         |            |
| 14223,   | 186854, | 3030.2953, | 14261,   | 187074, | 3027.9421, | 14299,   | 186852, | 3025.5888, |
| 7.572823 |         |            | 7.566942 |         |            | 7.561061 |         |            |
| 14224,   | 186264, | 3030.2334, | 14262,   | 187500, | 3027.8801, | 14300,   | 187580, | 3025.5269, |
| 7.572668 |         |            | 7.566787 |         |            | 7.560906 |         |            |
| 14225,   | 185594, | 3030.1714, | 14263,   | 187888, | 3027.8182, | 14301,   | 188364, | 3025.4650, |
| 7.572513 |         |            | 7.566632 |         |            | 7.560752 |         |            |
| 14226,   | 185048, | 3030.1095, | 14264,   | 188204, | 3027.7563, | 14302,   | 189022, | 3025.4031, |
| 7.572358 |         |            | 7.566478 |         |            | 7.560597 |         |            |
| 14227,   | 184866, | 3030.0476, | 14265,   | 188450, | 3027.6944, | 14303,   | 189376, | 3025.3411, |
| 7.572204 |         |            | 7.566323 |         |            | 7.560442 |         |            |
| 14228,   | 185016, | 3029.9857, | 14266,   | 188540, | 3027.6324, | 14304,   | 189296, | 3025.2792, |
| 7.572049 |         |            | 7.566168 |         |            | 7.560287 |         |            |
| 14229,   | 185158, | 3029.9237, | 14267,   | 188318, | 3027.5705, | 14305,   | 188802, | 3025.2173, |
| 7.571894 |         |            | 7.566013 |         |            | 7.560133 |         |            |
| 14230,   | 184930, | 3029.8618, | 14268,   | 187720, | 3027.5086, | 14306,   | 188106, | 3025.1554, |
| 7.571739 |         |            | 7.565859 |         |            | 7.559978 |         |            |
| 14231,   | 184378, | 3029.7999, | 14269,   | 186978, | 3027.4466, | 14307,   | 187496, | 3025.0934, |
| 7.571585 |         |            | 7.565704 |         |            | 7.559823 |         |            |
| 14232,   | 183916, | 3029.7379, | 14270,   | 186466, | 3027.3847, | 14308,   | 187136, | 3025.0315, |
| 7.571430 |         |            | 7.565549 |         |            | 7.559668 |         |            |
| 14233,   | 183970, | 3029.6760, | 14271,   | 186430, | 3027.3228, | 14309,   | 186934, | 3024.9696, |
| 7.571275 |         |            | 7.565394 |         |            | 7.559514 |         |            |
| 14234,   | 184552, | 3029.6141, | 14272,   | 186786, | 3027.2609, | 14310,   | 186668, | 3024.9076, |
| 7.571120 |         |            | 7.565240 |         |            | 7.559359 |         |            |
| 14235,   | 185316, | 3029.5522, | 14273,   | 187276, | 3027.1989, | 14311,   | 186234, | 3024.8457, |
| 7.570966 |         |            | 7.565085 |         |            | 7.559204 |         |            |
| 14236,   | 185924, | 3029.4902, | 14274,   | 187712, | 3027.1370, | 14312,   | 185796, | 3024.7838, |
| 7.570811 |         |            | 7.564930 |         |            | 7.559049 |         |            |
| 14237,   | 186308, | 3029.4283, | 14275,   | 188078, | 3027.0751, | 14313,   | 185606, | 3024.7219, |
| 7.570656 |         |            | 7.564775 |         |            | 7.558894 |         |            |
| 14238,   | 186618, | 3029.3664, | 14276,   | 188398, | 3027.0132, | 14314,   | 185724, | 3024.6599, |
| 7.570501 |         |            | 7.564621 |         |            | 7.558740 |         |            |
| 14239,   | 186908, | 3029.3045, | 14277,   | 188554, | 3026.9512, | 14315,   | 185884, | 3024.5980, |
| 7.570347 |         |            | 7.564466 |         |            | 7.558585 |         |            |
| 14240,   | 187038, | 3029.2425, | 14278,   | 188350, | 3026.8893, | 14316,   | 185748, | 3024.5361, |
| 7.570192 |         |            | 7.564311 |         |            | 7.558430 |         |            |
| 14241,   | 186878, | 3029.1806, | 14279,   | 187782, | 3026.8274, | 14317,   | 185232, | 3024.4742, |
| 7.570037 |         |            | 7.564156 |         |            | 7.558275 |         |            |
| 14242,   | 186574, | 3029.1187, | 14280,   | 187164, | 3026.7655, | 14318,   | 184616, | 3024.4122, |
| 7.569882 |         |            | 7.564001 |         |            | 7.558121 |         |            |
| 14243,   | 186516, | 3029.0567, | 14281,   | 186912, | 3026.7035, | 14319,   | 184254, | 3024.3503, |
| 7.569728 |         |            | 7.563847 |         |            | 7.557966 |         |            |
| 14244,   | 186954, | 3028.9948, | 14282,   | 187154, | 3026.6416, | 14320,   | 184250, | 3024.2884, |
| 7.569573 |         |            | 7.563692 |         |            | 7.557811 |         |            |
| 14245,   | 187706, | 3028.9329, | 14283,   | 187586, | 3026.5797, | 14321,   | 184372, | 3024.2264, |
| 7.569418 |         |            | 7.563537 |         |            | 7.557656 |         |            |
| 14246,   | 188246, | 3028.8710, | 14284,   | 187736, | 3026.5177, | 14322,   | 184334, | 3024.1645, |
| 7.569263 |         |            | 7.563382 |         |            | 7.557502 |         |            |
| 14247,   | 188152, | 3028.8090, | 14285,   | 187424, | 3026.4558, | 14323,   | 184104, | 3024.1026, |
| 7.569108 |         |            | 7.563228 |         |            | 7.557347 |         |            |
| 14248,   | 187434, | 3028.7471, | 14286,   | 186936, | 3026.3939, | 14324,   | 183928, | 3024.0407, |
| 7.568954 |         |            | 7.563073 |         |            | 7.557192 |         |            |
| 14249,   | 186504, | 3028.6852, | 14287,   | 186760, | 3026.3320, | 14325,   | 184038, | 3023.9787, |
| 7.568799 |         |            | 7.562918 |         |            | 7.557037 |         |            |
| 14250,   | 185808, | 3028.6233, | 14288,   | 187120, | 3026.2700, | 14326,   | 184410, | 3023.9168, |
| 7.568644 |         |            | 7.562763 |         |            | 7.556883 |         |            |
| 14251,   | 185550, | 3028.5613, | 14289,   | 187794, | 3026.2081, | 14327,   | 184768, | 3023.8549, |
| 7.568489 |         |            | 7.562609 |         |            | 7.556728 |         |            |
| 14252,   | 185698, | 3028.4994, | 14290,   | 188308, | 3026.1462, | 14328,   | 184862, | 3023.7930, |
| 7.568335 |         |            | 7.562454 |         |            | 7.556573 |         |            |
| 14253,   | 186122, | 3028.4375, | 14291,   | 188356, | 3026.0843, | 14329,   | 184696, | 3023.7310, |
| 7.568180 |         |            | 7.562299 |         |            | 7.556418 |         |            |
| 14254,   | 186686, | 3028.3756, | 14292,   | 187958, | 3026.0223, | 14330,   | 184490, | 3023.6691, |
| 7.568025 |         |            | 7.562144 |         |            | 7.556264 |         |            |
| 14255,   | 187216, | 3028.3136, | 14293,   | 187360, | 3025.9604, | 14331,   | 184490, | 3023.6072, |
| 7.567870 |         |            | 7.561990 |         |            | 7.556109 |         |            |
| 14256,   | 187508, | 3028.2517, | 14294,   | 186798, | 3025.8985, | 14332,   | 184732, | 3023.5453, |
| 7.567716 |         |            | 7.561835 |         |            | 7.555954 |         |            |
| 14257,   | 187436, | 3028.1898, | 14295,   | 186372, | 3025.8365, | 14333,   | 185090, | 3023.4833, |
| 7.567561 |         |            | 7.561680 |         |            | 7.555799 |         |            |
| 14258,   | 187108, | 3028.1278, | 14296,   | 186120, | 3025.7746, | 14334,   | 185372, | 3023.4214, |
| 7.567406 |         |            | 7.561525 |         |            | 7.555645 |         |            |

|          |         |            |          |         |            |          |         |            |
|----------|---------|------------|----------|---------|------------|----------|---------|------------|
| 14335,   | 185484, | 3023.3595, | 14373,   | 186254, | 3021.0062, | 14411,   | 189550, | 3018.6530, |
| 7.555490 |         |            | 7.549609 |         |            | 7.543728 |         |            |
| 14336,   | 185464, | 3023.2975, | 14374,   | 185862, | 3020.9443, | 14412,   | 190012, | 3018.5911, |
| 7.555335 |         |            | 7.549454 |         |            | 7.543573 |         |            |
| 14337,   | 185500, | 3023.2356, | 14375,   | 185440, | 3020.8824, | 14413,   | 189974, | 3018.5292, |
| 7.555180 |         |            | 7.549300 |         |            | 7.543419 |         |            |
| 14338,   | 185812, | 3023.1737, | 14376,   | 185098, | 3020.8205, | 14414,   | 189118, | 3018.4672, |
| 7.555026 |         |            | 7.549145 |         |            | 7.543264 |         |            |
| 14339,   | 186486, | 3023.1118, | 14377,   | 185100, | 3020.7585, | 14415,   | 187690, | 3018.4053, |
| 7.554871 |         |            | 7.548990 |         |            | 7.543109 |         |            |
| 14340,   | 187362, | 3023.0498, | 14378,   | 185638, | 3020.6966, | 14416,   | 186352, | 3018.3434, |
| 7.554716 |         |            | 7.548835 |         |            | 7.542954 |         |            |
| 14341,   | 188018, | 3022.9879, | 14379,   | 186576, | 3020.6347, | 14417,   | 185606, | 3018.2815, |
| 7.554561 |         |            | 7.548680 |         |            | 7.542800 |         |            |
| 14342,   | 188054, | 3022.9260, | 14380,   | 187442, | 3020.5728, | 14418,   | 185426, | 3018.2195, |
| 7.554407 |         |            | 7.548526 |         |            | 7.542645 |         |            |
| 14343,   | 187402, | 3022.8641, | 14381,   | 187838, | 3020.5108, | 14419,   | 185432, | 3018.1576, |
| 7.554252 |         |            | 7.548371 |         |            | 7.542490 |         |            |
| 14344,   | 186426, | 3022.8021, | 14382,   | 187834, | 3020.4489, | 14420,   | 185362, | 3018.0957, |
| 7.554097 |         |            | 7.548216 |         |            | 7.542335 |         |            |
| 14345,   | 185620, | 3022.7402, | 14383,   | 187934, | 3020.3870, | 14421,   | 185376, | 3018.0338, |
| 7.553942 |         |            | 7.548061 |         |            | 7.542181 |         |            |
| 14346,   | 185210, | 3022.6783, | 14384,   | 188514, | 3020.3251, | 14422,   | 185824, | 3017.9718, |
| 7.553787 |         |            | 7.547907 |         |            | 7.542026 |         |            |
| 14347,   | 185000, | 3022.6163, | 14385,   | 189374, | 3020.2631, | 14423,   | 186782, | 3017.9099, |
| 7.553633 |         |            | 7.547752 |         |            | 7.541871 |         |            |
| 14348,   | 184662, | 3022.5544, | 14386,   | 189826, | 3020.2012, | 14424,   | 187916, | 3017.8480, |
| 7.553478 |         |            | 7.547597 |         |            | 7.541716 |         |            |
| 14349,   | 184104, | 3022.4925, | 14387,   | 189330, | 3020.1393, | 14425,   | 188754, | 3017.7860, |
| 7.553323 |         |            | 7.547442 |         |            | 7.541562 |         |            |
| 14350,   | 183596, | 3022.4306, | 14388,   | 188028, | 3020.0773, | 14426,   | 189100, | 3017.7241, |
| 7.553168 |         |            | 7.547288 |         |            | 7.541407 |         |            |
| 14351,   | 183472, | 3022.3686, | 14389,   | 186626, | 3020.0154, | 14427,   | 189136, | 3017.6622, |
| 7.553014 |         |            | 7.547133 |         |            | 7.541252 |         |            |
| 14352,   | 183754, | 3022.3067, | 14390,   | 185798, | 3019.9535, | 14428,   | 189162, | 3017.6003, |
| 7.552859 |         |            | 7.546978 |         |            | 7.541097 |         |            |
| 14353,   | 184150, | 3022.2448, | 14391,   | 185692, | 3019.8916, | 14429,   | 189290, | 3017.5383, |
| 7.552704 |         |            | 7.546823 |         |            | 7.540943 |         |            |
| 14354,   | 184414, | 3022.1829, | 14392,   | 186022, | 3019.8296, | 14430,   | 189424, | 3017.4764, |
| 7.552549 |         |            | 7.546669 |         |            | 7.540788 |         |            |
| 14355,   | 184638, | 3022.1209, | 14393,   | 186480, | 3019.7677, | 14431,   | 189456, | 3017.4145, |
| 7.552395 |         |            | 7.546514 |         |            | 7.540633 |         |            |
| 14356,   | 185106, | 3022.0590, | 14394,   | 187020, | 3019.7058, | 14432,   | 189394, | 3017.3526, |
| 7.552240 |         |            | 7.546359 |         |            | 7.540478 |         |            |
| 14357,   | 185882, | 3021.9971, | 14395,   | 187716, | 3019.6439, | 14433,   | 189284, | 3017.2906, |
| 7.552085 |         |            | 7.546204 |         |            | 7.540324 |         |            |
| 14358,   | 186620, | 3021.9352, | 14396,   | 188448, | 3019.5819, | 14434,   | 189096, | 3017.2287, |
| 7.551930 |         |            | 7.546050 |         |            | 7.540169 |         |            |
| 14359,   | 186838, | 3021.8732, | 14397,   | 188928, | 3019.5200, | 14435,   | 188760, | 3017.1668, |
| 7.551776 |         |            | 7.545895 |         |            | 7.540014 |         |            |
| 14360,   | 186442, | 3021.8113, | 14398,   | 188964, | 3019.4581, | 14436,   | 188324, | 3017.1049, |
| 7.551621 |         |            | 7.545740 |         |            | 7.539859 |         |            |
| 14361,   | 185880, | 3021.7494, | 14399,   | 188714, | 3019.3961, | 14437,   | 188004, | 3017.0429, |
| 7.551466 |         |            | 7.545585 |         |            | 7.539705 |         |            |
| 14362,   | 185740, | 3021.6874, | 14400,   | 188578, | 3019.3342, | 14438,   | 187960, | 3016.9810, |
| 7.551311 |         |            | 7.545431 |         |            | 7.539550 |         |            |
| 14363,   | 186182, | 3021.6255, | 14401,   | 188802, | 3019.2723, | 14439,   | 188100, | 3016.9191, |
| 7.551157 |         |            | 7.545276 |         |            | 7.539395 |         |            |
| 14364,   | 186780, | 3021.5636, | 14402,   | 189266, | 3019.2104, | 14440,   | 188114, | 3016.8571, |
| 7.551002 |         |            | 7.545121 |         |            | 7.539240 |         |            |
| 14365,   | 186986, | 3021.5017, | 14403,   | 189640, | 3019.1484, | 14441,   | 187806, | 3016.7952, |
| 7.550847 |         |            | 7.544966 |         |            | 7.539086 |         |            |
| 14366,   | 186656, | 3021.4397, | 14404,   | 189750, | 3019.0865, | 14442,   | 187374, | 3016.7333, |
| 7.550692 |         |            | 7.544812 |         |            | 7.538931 |         |            |
| 14367,   | 186154, | 3021.3778, | 14405,   | 189654, | 3019.0246, | 14443,   | 187224, | 3016.6714, |
| 7.550538 |         |            | 7.544657 |         |            | 7.538776 |         |            |
| 14368,   | 185956, | 3021.3159, | 14406,   | 189514, | 3018.9627, | 14444,   | 187606, | 3016.6094, |
| 7.550383 |         |            | 7.544502 |         |            | 7.538621 |         |            |
| 14369,   | 186176, | 3021.2540, | 14407,   | 189370, | 3018.9007, | 14445,   | 188314, | 3016.5475, |
| 7.550228 |         |            | 7.544347 |         |            | 7.538466 |         |            |
| 14370,   | 186540, | 3021.1920, | 14408,   | 189184, | 3018.8388, | 14446,   | 188884, | 3016.4856, |
| 7.550073 |         |            | 7.544193 |         |            | 7.538312 |         |            |
| 14371,   | 186708, | 3021.1301, | 14409,   | 189034, | 3018.7769, | 14447,   | 189040, | 3016.4237, |
| 7.549919 |         |            | 7.544038 |         |            | 7.538157 |         |            |
| 14372,   | 186576, | 3021.0682, | 14410,   | 189128, | 3018.7150, | 14448,   | 188906, | 3016.3617, |
| 7.549764 |         |            | 7.543883 |         |            | 7.538002 |         |            |

|          |         |            |          |         |            |          |         |            |
|----------|---------|------------|----------|---------|------------|----------|---------|------------|
| 14449,   | 188810, | 3016.2998, | 14487,   | 188262, | 3013.9466, | 14525,   | 190066, | 3011.5934, |
| 7.537847 |         |            | 7.531967 |         |            | 7.526086 |         |            |
| 14450,   | 188910, | 3016.2379, | 14488,   | 188988, | 3013.8847, | 14526,   | 190066, | 3011.5314, |
| 7.537693 |         |            | 7.531812 |         |            | 7.525931 |         |            |
| 14451,   | 189078, | 3016.1760, | 14489,   | 189214, | 3013.8227, | 14527,   | 190058, | 3011.4695, |
| 7.537538 |         |            | 7.531657 |         |            | 7.525776 |         |            |
| 14452,   | 189116, | 3016.1140, | 14490,   | 188786, | 3013.7608, | 14528,   | 189650, | 3011.4076, |
| 7.537383 |         |            | 7.531502 |         |            | 7.525622 |         |            |
| 14453,   | 189040, | 3016.0521, | 14491,   | 187952, | 3013.6989, | 14529,   | 188810, | 3011.3457, |
| 7.537228 |         |            | 7.531348 |         |            | 7.525467 |         |            |
| 14454,   | 189044, | 3015.9902, | 14492,   | 187180, | 3013.6369, | 14530,   | 187872, | 3011.2837, |
| 7.537074 |         |            | 7.531193 |         |            | 7.525312 |         |            |
| 14455,   | 189250, | 3015.9282, | 14493,   | 186778, | 3013.5750, | 14531,   | 187220, | 3011.2218, |
| 7.536919 |         |            | 7.531038 |         |            | 7.525157 |         |            |
| 14456,   | 189548, | 3015.8663, | 14494,   | 186680, | 3013.5131, | 14532,   | 186986, | 3011.1599, |
| 7.536764 |         |            | 7.530883 |         |            | 7.525003 |         |            |
| 14457,   | 189720, | 3015.8044, | 14495,   | 186626, | 3013.4512, | 14533,   | 187028, | 3011.0979, |
| 7.536609 |         |            | 7.530729 |         |            | 7.524848 |         |            |
| 14458,   | 189710, | 3015.7425, | 14496,   | 186534, | 3013.3892, | 14534,   | 187156, | 3011.0360, |
| 7.536455 |         |            | 7.530574 |         |            | 7.524693 |         |            |
| 14459,   | 189644, | 3015.6805, | 14497,   | 186632, | 3013.3273, | 14535,   | 187290, | 3010.9741, |
| 7.536300 |         |            | 7.530419 |         |            | 7.524538 |         |            |
| 14460,   | 189658, | 3015.6186, | 14498,   | 187176, | 3013.2654, | 14536,   | 187448, | 3010.9122, |
| 7.536145 |         |            | 7.530264 |         |            | 7.524384 |         |            |
| 14461,   | 189660, | 3015.5567, | 14499,   | 188138, | 3013.2035, | 14537,   | 187632, | 3010.8502, |
| 7.535990 |         |            | 7.530110 |         |            | 7.524229 |         |            |
| 14462,   | 189488, | 3015.4948, | 14500,   | 189186, | 3013.1415, | 14538,   | 187810, | 3010.7883, |
| 7.535836 |         |            | 7.529955 |         |            | 7.524074 |         |            |
| 14463,   | 189180, | 3015.4328, | 14501,   | 189982, | 3013.0796, | 14539,   | 188016, | 3010.7264, |
| 7.535681 |         |            | 7.529800 |         |            | 7.523919 |         |            |
| 14464,   | 189042, | 3015.3709, | 14502,   | 190464, | 3013.0177, | 14540,   | 188354, | 3010.6645, |
| 7.535526 |         |            | 7.529645 |         |            | 7.523764 |         |            |
| 14465,   | 189364, | 3015.3090, | 14503,   | 190792, | 3012.9558, | 14541,   | 188816, | 3010.6025, |
| 7.535371 |         |            | 7.529491 |         |            | 7.523610 |         |            |
| 14466,   | 190054, | 3015.2470, | 14504,   | 191056, | 3012.8938, | 14542,   | 189182, | 3010.5406, |
| 7.535217 |         |            | 7.529336 |         |            | 7.523455 |         |            |
| 14467,   | 190630, | 3015.1851, | 14505,   | 191132, | 3012.8319, | 14543,   | 189134, | 3010.4787, |
| 7.535062 |         |            | 7.529181 |         |            | 7.523300 |         |            |
| 14468,   | 190662, | 3015.1232, | 14506,   | 190832, | 3012.7700, | 14544,   | 188572, | 3010.4167, |
| 7.534907 |         |            | 7.529026 |         |            | 7.523145 |         |            |
| 14469,   | 190206, | 3015.0613, | 14507,   | 190182, | 3012.7080, | 14545,   | 187802, | 3010.3548, |
| 7.534752 |         |            | 7.528871 |         |            | 7.522991 |         |            |
| 14470,   | 189720, | 3014.9993, | 14508,   | 189468, | 3012.6461, | 14546,   | 187340, | 3010.2929, |
| 7.534598 |         |            | 7.528717 |         |            | 7.522836 |         |            |
| 14471,   | 189578, | 3014.9374, | 14509,   | 188972, | 3012.5842, | 14547,   | 187490, | 3010.2310, |
| 7.534443 |         |            | 7.528562 |         |            | 7.522681 |         |            |
| 14472,   | 189624, | 3014.8755, | 14510,   | 188744, | 3012.5223, | 14548,   | 188124, | 3010.1690, |
| 7.534288 |         |            | 7.528407 |         |            | 7.522526 |         |            |
| 14473,   | 189362, | 3014.8136, | 14511,   | 188626, | 3012.4603, | 14549,   | 188814, | 3010.1071, |
| 7.534133 |         |            | 7.528252 |         |            | 7.522372 |         |            |
| 14474,   | 188486, | 3014.7516, | 14512,   | 188516, | 3012.3984, | 14550,   | 189232, | 3010.0452, |
| 7.533978 |         |            | 7.528098 |         |            | 7.522217 |         |            |
| 14475,   | 187238, | 3014.6897, | 14513,   | 188506, | 3012.3365, | 14551,   | 189336, | 3009.9833, |
| 7.533824 |         |            | 7.527943 |         |            | 7.522062 |         |            |
| 14476,   | 186218, | 3014.6278, | 14514,   | 188746, | 3012.2746, | 14552,   | 189242, | 3009.9213, |
| 7.533669 |         |            | 7.527788 |         |            | 7.521907 |         |            |
| 14477,   | 185806, | 3014.5659, | 14515,   | 189214, | 3012.2126, | 14553,   | 189010, | 3009.8594, |
| 7.533514 |         |            | 7.527633 |         |            | 7.521753 |         |            |
| 14478,   | 185854, | 3014.5039, | 14516,   | 189690, | 3012.1507, | 14554,   | 188658, | 3009.7975, |
| 7.533359 |         |            | 7.527479 |         |            | 7.521598 |         |            |
| 14479,   | 185908, | 3014.4420, | 14517,   | 190004, | 3012.0888, | 14555,   | 188294, | 3009.7356, |
| 7.533205 |         |            | 7.527324 |         |            | 7.521443 |         |            |
| 14480,   | 185694, | 3014.3801, | 14518,   | 190224, | 3012.0268, | 14556,   | 188228, | 3009.6736, |
| 7.533050 |         |            | 7.527169 |         |            | 7.521288 |         |            |
| 14481,   | 185350, | 3014.3181, | 14519,   | 190566, | 3011.9649, | 14557,   | 188688, | 3009.6117, |
| 7.532895 |         |            | 7.527014 |         |            | 7.521134 |         |            |
| 14482,   | 185182, | 3014.2562, | 14520,   | 191068, | 3011.9030, | 14558,   | 189532, | 3009.5498, |
| 7.532740 |         |            | 7.526860 |         |            | 7.520979 |         |            |
| 14483,   | 185372, | 3014.1943, | 14521,   | 191482, | 3011.8411, | 14559,   | 190246, | 3009.4878, |
| 7.532586 |         |            | 7.526705 |         |            | 7.520824 |         |            |
| 14484,   | 185870, | 3014.1324, | 14522,   | 191472, | 3011.7791, | 14560,   | 190374, | 3009.4259, |
| 7.532431 |         |            | 7.526550 |         |            | 7.520669 |         |            |
| 14485,   | 186550, | 3014.0704, | 14523,   | 190998, | 3011.7172, | 14561,   | 189924, | 3009.3640, |
| 7.532276 |         |            | 7.526395 |         |            | 7.520515 |         |            |
| 14486,   | 187372, | 3014.0085, | 14524,   | 190394, | 3011.6553, | 14562,   | 189358, | 3009.3021, |
| 7.532121 |         |            | 7.526241 |         |            | 7.520360 |         |            |

|          |         |            |          |         |            |          |         |            |
|----------|---------|------------|----------|---------|------------|----------|---------|------------|
| 14563,   | 189124, | 3009.2401, | 14601,   | 189178, | 3006.8869, | 14639,   | 190190, | 3004.5337, |
| 7.520205 |         |            | 7.514324 |         |            | 7.508443 |         |            |
| 14564,   | 189198, | 3009.1782, | 14602,   | 189292, | 3006.8250, | 14640,   | 190290, | 3004.4718, |
| 7.520050 |         |            | 7.514170 |         |            | 7.508289 |         |            |
| 14565,   | 189170, | 3009.1163, | 14603,   | 189604, | 3006.7631, | 14641,   | 190178, | 3004.4098, |
| 7.519896 |         |            | 7.514015 |         |            | 7.508134 |         |            |
| 14566,   | 188722, | 3009.0544, | 14604,   | 189838, | 3006.7011, | 14642,   | 189742, | 3004.3479, |
| 7.519741 |         |            | 7.513860 |         |            | 7.507979 |         |            |
| 14567,   | 188026, | 3008.9924, | 14605,   | 189894, | 3006.6392, | 14643,   | 189178, | 3004.2860, |
| 7.519586 |         |            | 7.513705 |         |            | 7.507824 |         |            |
| 14568,   | 187620, | 3008.9305, | 14606,   | 189902, | 3006.5773, | 14644,   | 188800, | 3004.2241, |
| 7.519431 |         |            | 7.513550 |         |            | 7.507670 |         |            |
| 14569,   | 187876, | 3008.8686, | 14607,   | 190048, | 3006.5154, | 14645,   | 188738, | 3004.1621, |
| 7.519277 |         |            | 7.513396 |         |            | 7.507515 |         |            |
| 14570,   | 188644, | 3008.8066, | 14608,   | 190392, | 3006.4534, | 14646,   | 188870, | 3004.1002, |
| 7.519122 |         |            | 7.513241 |         |            | 7.507360 |         |            |
| 14571,   | 189410, | 3008.7447, | 14609,   | 190834, | 3006.3915, | 14647,   | 189008, | 3004.0383, |
| 7.518967 |         |            | 7.513086 |         |            | 7.507205 |         |            |
| 14572,   | 189766, | 3008.6828, | 14610,   | 191180, | 3006.3296, | 14648,   | 189128, | 3003.9764, |
| 7.518812 |         |            | 7.512931 |         |            | 7.507051 |         |            |
| 14573,   | 189718, | 3008.6209, | 14611,   | 191250, | 3006.2676, | 14649,   | 189340, | 3003.9144, |
| 7.518657 |         |            | 7.512777 |         |            | 7.506896 |         |            |
| 14574,   | 189562, | 3008.5589, | 14612,   | 190966, | 3006.2057, | 14650,   | 189740, | 3003.8525, |
| 7.518503 |         |            | 7.512622 |         |            | 7.506741 |         |            |
| 14575,   | 189520, | 3008.4970, | 14613,   | 190468, | 3006.1438, | 14651,   | 190238, | 3003.7906, |
| 7.518348 |         |            | 7.512467 |         |            | 7.506586 |         |            |
| 14576,   | 189562, | 3008.4351, | 14614,   | 190088, | 3006.0819, | 14652,   | 190680, | 3003.7286, |
| 7.518193 |         |            | 7.512312 |         |            | 7.506432 |         |            |
| 14577,   | 189572, | 3008.3732, | 14615,   | 190206, | 3006.0199, | 14653,   | 191004, | 3003.6667, |
| 7.518038 |         |            | 7.512158 |         |            | 7.506277 |         |            |
| 14578,   | 189552, | 3008.3112, | 14616,   | 190922, | 3005.9580, | 14654,   | 191238, | 3003.6048, |
| 7.517884 |         |            | 7.512003 |         |            | 7.506122 |         |            |
| 14579,   | 189654, | 3008.2493, | 14617,   | 191886, | 3005.8961, | 14655,   | 191422, | 3003.5429, |
| 7.517729 |         |            | 7.511848 |         |            | 7.505967 |         |            |
| 14580,   | 189990, | 3008.1874, | 14618,   | 192478, | 3005.8342, | 14656,   | 191458, | 3003.4809, |
| 7.517574 |         |            | 7.511693 |         |            | 7.505813 |         |            |
| 14581,   | 190502, | 3008.1255, | 14619,   | 192260, | 3005.7722, | 14657,   | 191218, | 3003.4190, |
| 7.517419 |         |            | 7.511539 |         |            | 7.505658 |         |            |
| 14582,   | 191024, | 3008.0635, | 14620,   | 191398, | 3005.7103, | 14658,   | 190706, | 3003.3571, |
| 7.517265 |         |            | 7.511384 |         |            | 7.505503 |         |            |
| 14583,   | 191424, | 3008.0016, | 14621,   | 190540, | 3005.6484, | 14659,   | 190080, | 3003.2952, |
| 7.517110 |         |            | 7.511229 |         |            | 7.505348 |         |            |
| 14584,   | 191670, | 3007.9397, | 14622,   | 190308, | 3005.5864, | 14660,   | 189512, | 3003.2332, |
| 7.516955 |         |            | 7.511074 |         |            | 7.505194 |         |            |
| 14585,   | 191726, | 3007.8777, | 14623,   | 190798, | 3005.5245, | 14661,   | 189040, | 3003.1713, |
| 7.516800 |         |            | 7.510920 |         |            | 7.505039 |         |            |
| 14586,   | 191486, | 3007.8158, | 14624,   | 191542, | 3005.4626, | 14662,   | 188598, | 3003.1094, |
| 7.516646 |         |            | 7.510765 |         |            | 7.504884 |         |            |
| 14587,   | 190870, | 3007.7539, | 14625,   | 191994, | 3005.4007, | 14663,   | 188210, | 3003.0474, |
| 7.516491 |         |            | 7.510610 |         |            | 7.504729 |         |            |
| 14588,   | 189992, | 3007.6920, | 14626,   | 191974, | 3005.3387, | 14664,   | 188044, | 3002.9855, |
| 7.516336 |         |            | 7.510455 |         |            | 7.504575 |         |            |
| 14589,   | 189168, | 3007.6300, | 14627,   | 191698, | 3005.2768, | 14665,   | 188256, | 3002.9236, |
| 7.516181 |         |            | 7.510301 |         |            | 7.504420 |         |            |
| 14590,   | 188732, | 3007.5681, | 14628,   | 191462, | 3005.2149, | 14666,   | 188722, | 3002.8617, |
| 7.516027 |         |            | 7.510146 |         |            | 7.504265 |         |            |
| 14591,   | 188778, | 3007.5062, | 14629,   | 191298, | 3005.1530, | 14667,   | 189066, | 3002.7997, |
| 7.515872 |         |            | 7.509991 |         |            | 7.504110 |         |            |
| 14592,   | 189156, | 3007.4443, | 14630,   | 191064, | 3005.0910, | 14668,   | 188920, | 3002.7378, |
| 7.515717 |         |            | 7.509836 |         |            | 7.503956 |         |            |
| 14593,   | 189642, | 3007.3823, | 14631,   | 190698, | 3005.0291, | 14669,   | 188276, | 3002.6759, |
| 7.515562 |         |            | 7.509682 |         |            | 7.503801 |         |            |
| 14594,   | 190138, | 3007.3204, | 14632,   | 190380, | 3004.9672, | 14670,   | 187492, | 3002.6140, |
| 7.515408 |         |            | 7.509527 |         |            | 7.503646 |         |            |
| 14595,   | 190622, | 3007.2585, | 14633,   | 190322, | 3004.9053, | 14671,   | 187006, | 3002.5520, |
| 7.515253 |         |            | 7.509372 |         |            | 7.503491 |         |            |
| 14596,   | 191018, | 3007.1965, | 14634,   | 190518, | 3004.8433, | 14672,   | 187004, | 3002.4901, |
| 7.515098 |         |            | 7.509217 |         |            | 7.503336 |         |            |
| 14597,   | 191124, | 3007.1346, | 14635,   | 190702, | 3004.7814, | 14673,   | 187400, | 3002.4282, |
| 7.514943 |         |            | 7.509063 |         |            | 7.503182 |         |            |
| 14598,   | 190798, | 3007.0727, | 14636,   | 190638, | 3004.7195, | 14674,   | 188020, | 3002.3663, |
| 7.514789 |         |            | 7.508908 |         |            | 7.503027 |         |            |
| 14599,   | 190134, | 3007.0108, | 14637,   | 190376, | 3004.6575, | 14675,   | 188762, | 3002.3043, |
| 7.514634 |         |            | 7.508753 |         |            | 7.502872 |         |            |
| 14600,   | 189484, | 3006.9488, | 14638,   | 190170, | 3004.5956, | 14676,   | 189502, | 3002.2424, |
| 7.514479 |         |            | 7.508598 |         |            | 7.502717 |         |            |

|          |         |            |          |         |            |          |         |            |
|----------|---------|------------|----------|---------|------------|----------|---------|------------|
| 14677,   | 190024, | 3002.1805, | 14715,   | 194072, | 2999.8272, | 14753,   | 192024, | 2997.4740, |
| 7.502563 |         |            | 7.496682 |         |            | 7.490801 |         |            |
| 14678,   | 190088, | 3002.1185, | 14716,   | 193756, | 2999.7653, | 14754,   | 191730, | 2997.4121, |
| 7.502408 |         |            | 7.496527 |         |            | 7.490646 |         |            |
| 14679,   | 189664, | 3002.0566, | 14717,   | 193106, | 2999.7034, | 14755,   | 191236, | 2997.3502, |
| 7.502253 |         |            | 7.496372 |         |            | 7.490492 |         |            |
| 14680,   | 189072, | 3001.9947, | 14718,   | 192176, | 2999.6415, | 14756,   | 190704, | 2997.2882, |
| 7.502098 |         |            | 7.496218 |         |            | 7.490337 |         |            |
| 14681,   | 188778, | 3001.9328, | 14719,   | 191258, | 2999.5795, | 14757,   | 190382, | 2997.2263, |
| 7.501944 |         |            | 7.496063 |         |            | 7.490182 |         |            |
| 14682,   | 189010, | 3001.8708, | 14720,   | 190628, | 2999.5176, | 14758,   | 190348, | 2997.1644, |
| 7.501789 |         |            | 7.495908 |         |            | 7.490027 |         |            |
| 14683,   | 189606, | 3001.8089, | 14721,   | 190268, | 2999.4557, | 14759,   | 190448, | 2997.1025, |
| 7.501634 |         |            | 7.495753 |         |            | 7.489873 |         |            |
| 14684,   | 190212, | 3001.7470, | 14722,   | 190002, | 2999.3938, | 14760,   | 190466, | 2997.0405, |
| 7.501479 |         |            | 7.495599 |         |            | 7.489718 |         |            |
| 14685,   | 190656, | 3001.6851, | 14723,   | 189806, | 2999.3318, | 14761,   | 190376, | 2996.9786, |
| 7.501325 |         |            | 7.495444 |         |            | 7.489563 |         |            |
| 14686,   | 190990, | 3001.6231, | 14724,   | 189894, | 2999.2699, | 14762,   | 190354, | 2996.9167, |
| 7.501170 |         |            | 7.495289 |         |            | 7.489408 |         |            |
| 14687,   | 191290, | 3001.5612, | 14725,   | 190444, | 2999.2080, | 14763,   | 190490, | 2996.8548, |
| 7.501015 |         |            | 7.495134 |         |            | 7.489254 |         |            |
| 14688,   | 191448, | 3001.4993, | 14726,   | 191260, | 2999.1461, | 14764,   | 190616, | 2996.7928, |
| 7.500860 |         |            | 7.494980 |         |            | 7.489099 |         |            |
| 14689,   | 191264, | 3001.4373, | 14727,   | 191814, | 2999.0841, | 14765,   | 190408, | 2996.7309, |
| 7.500706 |         |            | 7.494825 |         |            | 7.488944 |         |            |
| 14690,   | 190784, | 3001.3754, | 14728,   | 191728, | 2999.0222, | 14766,   | 189784, | 2996.6690, |
| 7.500551 |         |            | 7.494670 |         |            | 7.488789 |         |            |
| 14691,   | 190376, | 3001.3135, | 14729,   | 191188, | 2998.9603, | 14767,   | 189066, | 2996.6070, |
| 7.500396 |         |            | 7.494515 |         |            | 7.488634 |         |            |
| 14692,   | 190396, | 3001.2516, | 14730,   | 190804, | 2998.8983, | 14768,   | 188734, | 2996.5451, |
| 7.500241 |         |            | 7.494361 |         |            | 7.488480 |         |            |
| 14693,   | 190756, | 3001.1896, | 14731,   | 191040, | 2998.8364, | 14769,   | 188968, | 2996.4832, |
| 7.500087 |         |            | 7.494206 |         |            | 7.488325 |         |            |
| 14694,   | 190892, | 3001.1277, | 14732,   | 191736, | 2998.7745, | 14770,   | 189494, | 2996.4213, |
| 7.499932 |         |            | 7.494051 |         |            | 7.488170 |         |            |
| 14695,   | 190338, | 3001.0658, | 14733,   | 192248, | 2998.7126, | 14771,   | 189904, | 2996.3593, |
| 7.499777 |         |            | 7.493896 |         |            | 7.488015 |         |            |
| 14696,   | 189222, | 3001.0039, | 14734,   | 192026, | 2998.6506, | 14772,   | 190046, | 2996.2974, |
| 7.499622 |         |            | 7.493742 |         |            | 7.487861 |         |            |
| 14697,   | 188242, | 3000.9419, | 14735,   | 191066, | 2998.5887, | 14773,   | 190152, | 2996.2355, |
| 7.499468 |         |            | 7.493587 |         |            | 7.487706 |         |            |
| 14698,   | 188036, | 3000.8800, | 14736,   | 189818, | 2998.5268, | 14774,   | 190462, | 2996.1736, |
| 7.499313 |         |            | 7.493432 |         |            | 7.487551 |         |            |
| 14699,   | 188574, | 3000.8181, | 14737,   | 188740, | 2998.4649, | 14775,   | 190848, | 2996.1116, |
| 7.499158 |         |            | 7.493277 |         |            | 7.487396 |         |            |
| 14700,   | 189234, | 3000.7562, | 14738,   | 187998, | 2998.4029, | 14776,   | 190894, | 2996.0497, |
| 7.499003 |         |            | 7.493122 |         |            | 7.487242 |         |            |
| 14701,   | 189446, | 3000.6942, | 14739,   | 187536, | 2998.3410, | 14777,   | 190372, | 2995.9878, |
| 7.498849 |         |            | 7.492968 |         |            | 7.487087 |         |            |
| 14702,   | 189248, | 3000.6323, | 14740,   | 187332, | 2998.2791, | 14778,   | 189564, | 2995.9259, |
| 7.498694 |         |            | 7.492813 |         |            | 7.486932 |         |            |
| 14703,   | 189192, | 3000.5704, | 14741,   | 187496, | 2998.2171, | 14779,   | 189098, | 2995.8639, |
| 7.498539 |         |            | 7.492658 |         |            | 7.486777 |         |            |
| 14704,   | 189742, | 3000.5084, | 14742,   | 188060, | 2998.1552, | 14780,   | 189354, | 2995.8020, |
| 7.498384 |         |            | 7.492503 |         |            | 7.486623 |         |            |
| 14705,   | 190794, | 3000.4465, | 14743,   | 188850, | 2998.0933, | 14781,   | 190114, | 2995.7401, |
| 7.498229 |         |            | 7.492349 |         |            | 7.486468 |         |            |
| 14706,   | 191874, | 3000.3846, | 14744,   | 189546, | 2998.0314, | 14782,   | 190736, | 2995.6781, |
| 7.498075 |         |            | 7.492194 |         |            | 7.486313 |         |            |
| 14707,   | 192610, | 3000.3227, | 14745,   | 189978, | 2997.9694, | 14783,   | 190750, | 2995.6162, |
| 7.497920 |         |            | 7.492039 |         |            | 7.486158 |         |            |
| 14708,   | 193056, | 3000.2607, | 14746,   | 190240, | 2997.9075, | 14784,   | 190220, | 2995.5543, |
| 7.497765 |         |            | 7.491884 |         |            | 7.486004 |         |            |
| 14709,   | 193492, | 3000.1988, | 14747,   | 190558, | 2997.8456, | 14785,   | 189598, | 2995.4924, |
| 7.497610 |         |            | 7.491730 |         |            | 7.485849 |         |            |
| 14710,   | 194020, | 3000.1369, | 14748,   | 191022, | 2997.7837, | 14786,   | 189284, | 2995.4304, |
| 7.497456 |         |            | 7.491575 |         |            | 7.485694 |         |            |
| 14711,   | 194460, | 3000.0750, | 14749,   | 191512, | 2997.7217, | 14787,   | 189302, | 2995.3685, |
| 7.497301 |         |            | 7.491420 |         |            | 7.485539 |         |            |
| 14712,   | 194600, | 3000.0130, | 14750,   | 191878, | 2997.6598, | 14788,   | 189400, | 2995.3066, |
| 7.497146 |         |            | 7.491265 |         |            | 7.485385 |         |            |
| 14713,   | 194462, | 2999.9511, | 14751,   | 192066, | 2997.5979, | 14789,   | 189316, | 2995.2447, |
| 7.496991 |         |            | 7.491111 |         |            | 7.485230 |         |            |
| 14714,   | 194258, | 2999.8892, | 14752,   | 192114, | 2997.5360, | 14790,   | 188994, | 2995.1827, |
| 7.496837 |         |            | 7.490956 |         |            | 7.485075 |         |            |

|          |         |            |          |         |            |          |         |            |
|----------|---------|------------|----------|---------|------------|----------|---------|------------|
| 14791,   | 188566, | 2995.1208, | 14829,   | 192948, | 2992.7676, | 14867,   | 189952, | 2990.4144, |
| 7.484920 |         |            | 7.479040 |         |            | 7.473159 |         |            |
| 14792,   | 188208, | 2995.0589, | 14830,   | 193498, | 2992.7057, | 14868,   | 189884, | 2990.3524, |
| 7.484766 |         |            | 7.478885 |         |            | 7.473004 |         |            |
| 14793,   | 188052, | 2994.9969, | 14831,   | 193672, | 2992.6437, | 14869,   | 189606, | 2990.2905, |
| 7.484611 |         |            | 7.478730 |         |            | 7.472849 |         |            |
| 14794,   | 188162, | 2994.9350, | 14832,   | 193686, | 2992.5818, | 14870,   | 189432, | 2990.2286, |
| 7.484456 |         |            | 7.478575 |         |            | 7.472694 |         |            |
| 14795,   | 188524, | 2994.8731, | 14833,   | 193956, | 2992.5199, | 14871,   | 189688, | 2990.1667, |
| 7.484301 |         |            | 7.478420 |         |            | 7.472540 |         |            |
| 14796,   | 189012, | 2994.8112, | 14834,   | 194666, | 2992.4579, | 14872,   | 190380, | 2990.1047, |
| 7.484147 |         |            | 7.478266 |         |            | 7.472385 |         |            |
| 14797,   | 189470, | 2994.7492, | 14835,   | 195510, | 2992.3960, | 14873,   | 191108, | 2990.0428, |
| 7.483992 |         |            | 7.478111 |         |            | 7.472230 |         |            |
| 14798,   | 189840, | 2994.6873, | 14836,   | 195978, | 2992.3341, | 14874,   | 191418, | 2989.9809, |
| 7.483837 |         |            | 7.477956 |         |            | 7.472075 |         |            |
| 14799,   | 190206, | 2994.6254, | 14837,   | 195832, | 2992.2722, | 14875,   | 191182, | 2989.9189, |
| 7.483682 |         |            | 7.477801 |         |            | 7.471921 |         |            |
| 14800,   | 190670, | 2994.5635, | 14838,   | 195286, | 2992.2102, | 14876,   | 190632, | 2989.8570, |
| 7.483527 |         |            | 7.477647 |         |            | 7.471766 |         |            |
| 14801,   | 191178, | 2994.5015, | 14839,   | 194726, | 2992.1483, | 14877,   | 190102, | 2989.7951, |
| 7.483373 |         |            | 7.477492 |         |            | 7.471611 |         |            |
| 14802,   | 191502, | 2994.4396, | 14840,   | 194336, | 2992.0864, | 14878,   | 189768, | 2989.7332, |
| 7.483218 |         |            | 7.477337 |         |            | 7.471456 |         |            |
| 14803,   | 191458, | 2994.3777, | 14841,   | 193988, | 2992.0245, | 14879,   | 189668, | 2989.6712, |
| 7.483063 |         |            | 7.477182 |         |            | 7.471302 |         |            |
| 14804,   | 191140, | 2994.3158, | 14842,   | 193540, | 2991.9625, | 14880,   | 189874, | 2989.6093, |
| 7.482908 |         |            | 7.477028 |         |            | 7.471147 |         |            |
| 14805,   | 190876, | 2994.2538, | 14843,   | 193080, | 2991.9006, | 14881,   | 190508, | 2989.5474, |
| 7.482754 |         |            | 7.476873 |         |            | 7.470992 |         |            |
| 14806,   | 190946, | 2994.1919, | 14844,   | 192846, | 2991.8387, | 14882,   | 191554, | 2989.4855, |
| 7.482599 |         |            | 7.476718 |         |            | 7.470837 |         |            |
| 14807,   | 191298, | 2994.1300, | 14845,   | 192930, | 2991.7767, | 14883,   | 192678, | 2989.4235, |
| 7.482444 |         |            | 7.476563 |         |            | 7.470683 |         |            |
| 14808,   | 191634, | 2994.0680, | 14846,   | 193122, | 2991.7148, | 14884,   | 193382, | 2989.3616, |
| 7.482289 |         |            | 7.476409 |         |            | 7.470528 |         |            |
| 14809,   | 191754, | 2994.0061, | 14847,   | 193110, | 2991.6529, | 14885,   | 193406, | 2989.2997, |
| 7.482135 |         |            | 7.476254 |         |            | 7.470373 |         |            |
| 14810,   | 191790, | 2993.9442, | 14848,   | 192842, | 2991.5910, | 14886,   | 192956, | 2989.2377, |
| 7.481980 |         |            | 7.476099 |         |            | 7.470218 |         |            |
| 14811,   | 192024, | 2993.8823, | 14849,   | 192568, | 2991.5290, | 14887,   | 192546, | 2989.1758, |
| 7.481825 |         |            | 7.475944 |         |            | 7.470064 |         |            |
| 14812,   | 192504, | 2993.8203, | 14850,   | 192588, | 2991.4671, | 14888,   | 192542, | 2989.1139, |
| 7.481670 |         |            | 7.475790 |         |            | 7.469909 |         |            |
| 14813,   | 192892, | 2993.7584, | 14851,   | 192918, | 2991.4052, | 14889,   | 192900, | 2989.0520, |
| 7.481516 |         |            | 7.475635 |         |            | 7.469754 |         |            |
| 14814,   | 192772, | 2993.6965, | 14852,   | 193256, | 2991.3433, | 14890,   | 193296, | 2988.9900, |
| 7.481361 |         |            | 7.475480 |         |            | 7.469599 |         |            |
| 14815,   | 192090, | 2993.6346, | 14853,   | 193288, | 2991.2813, | 14891,   | 193468, | 2988.9281, |
| 7.481206 |         |            | 7.475325 |         |            | 7.469445 |         |            |
| 14816,   | 191236, | 2993.5726, | 14854,   | 192932, | 2991.2194, | 14892,   | 193390, | 2988.8662, |
| 7.481051 |         |            | 7.475171 |         |            | 7.469290 |         |            |
| 14817,   | 190684, | 2993.5107, | 14855,   | 192346, | 2991.1575, | 14893,   | 193136, | 2988.8043, |
| 7.480897 |         |            | 7.475016 |         |            | 7.469135 |         |            |
| 14818,   | 190552, | 2993.4488, | 14856,   | 191758, | 2991.0956, | 14894,   | 192726, | 2988.7423, |
| 7.480742 |         |            | 7.474861 |         |            | 7.468980 |         |            |
| 14819,   | 190556, | 2993.3868, | 14857,   | 191276, | 2991.0336, | 14895,   | 192168, | 2988.6804, |
| 7.480587 |         |            | 7.474706 |         |            | 7.468826 |         |            |
| 14820,   | 190382, | 2993.3249, | 14858,   | 190938, | 2990.9717, | 14896,   | 191620, | 2988.6185, |
| 7.480432 |         |            | 7.474552 |         |            | 7.468671 |         |            |
| 14821,   | 190062, | 2993.2630, | 14859,   | 190764, | 2990.9098, | 14897,   | 191366, | 2988.5566, |
| 7.480278 |         |            | 7.474397 |         |            | 7.468516 |         |            |
| 14822,   | 189900, | 2993.2011, | 14860,   | 190746, | 2990.8478, | 14898,   | 191564, | 2988.4946, |
| 7.480123 |         |            | 7.474242 |         |            | 7.468361 |         |            |
| 14823,   | 190114, | 2993.1391, | 14861,   | 190776, | 2990.7859, | 14899,   | 192016, | 2988.4327, |
| 7.479968 |         |            | 7.474087 |         |            | 7.468206 |         |            |
| 14824,   | 190578, | 2993.0772, | 14862,   | 190674, | 2990.7240, | 14900,   | 192288, | 2988.3708, |
| 7.479813 |         |            | 7.473933 |         |            | 7.468052 |         |            |
| 14825,   | 191006, | 2993.0153, | 14863,   | 190362, | 2990.6621, | 14901,   | 192152, | 2988.3088, |
| 7.479659 |         |            | 7.473778 |         |            | 7.467897 |         |            |
| 14826,   | 191294, | 2992.9534, | 14864,   | 189984, | 2990.6001, | 14902,   | 191884, | 2988.2469, |
| 7.479504 |         |            | 7.473623 |         |            | 7.467742 |         |            |
| 14827,   | 191630, | 2992.8914, | 14865,   | 189776, | 2990.5382, | 14903,   | 192042, | 2988.1850, |
| 7.479349 |         |            | 7.473468 |         |            | 7.467587 |         |            |
| 14828,   | 192212, | 2992.8295, | 14866,   | 189826, | 2990.4763, | 14904,   | 192896, | 2988.1231, |
| 7.479194 |         |            | 7.473313 |         |            | 7.467433 |         |            |

|          |         |            |          |         |            |          |         |            |
|----------|---------|------------|----------|---------|------------|----------|---------|------------|
| 14905,   | 194094, | 2988.0611, | 14943,   | 193698, | 2985.7079, | 14981,   | 192978, | 2983.3547, |
| 7.467278 |         |            | 7.461397 |         |            | 7.455516 |         |            |
| 14906,   | 194946, | 2987.9992, | 14944,   | 194090, | 2985.6460, | 14982,   | 193612, | 2983.2928, |
| 7.467123 |         |            | 7.461242 |         |            | 7.455362 |         |            |
| 14907,   | 195014, | 2987.9373, | 14945,   | 193926, | 2985.5841, | 14983,   | 193898, | 2983.2308, |
| 7.466968 |         |            | 7.461088 |         |            | 7.455207 |         |            |
| 14908,   | 194466, | 2987.8754, | 14946,   | 193310, | 2985.5221, | 14984,   | 193792, | 2983.1689, |
| 7.466814 |         |            | 7.460933 |         |            | 7.455052 |         |            |
| 14909,   | 193846, | 2987.8134, | 14947,   | 192684, | 2985.4602, | 14985,   | 193470, | 2983.1070, |
| 7.466659 |         |            | 7.460778 |         |            | 7.454897 |         |            |
| 14910,   | 193582, | 2987.7515, | 14948,   | 192344, | 2985.3983, | 14986,   | 193118, | 2983.0451, |
| 7.466504 |         |            | 7.460623 |         |            | 7.454743 |         |            |
| 14911,   | 193704, | 2987.6896, | 14949,   | 192212, | 2985.3364, | 14987,   | 192798, | 2982.9831, |
| 7.466349 |         |            | 7.460469 |         |            | 7.454588 |         |            |
| 14912,   | 194022, | 2987.6276, | 14950,   | 192034, | 2985.2744, | 14988,   | 192540, | 2982.9212, |
| 7.466195 |         |            | 7.460314 |         |            | 7.454433 |         |            |
| 14913,   | 194428, | 2987.5657, | 14951,   | 191762, | 2985.2125, | 14989,   | 192438, | 2982.8593, |
| 7.466040 |         |            | 7.460159 |         |            | 7.454278 |         |            |
| 14914,   | 194918, | 2987.5038, | 14952,   | 191606, | 2985.1506, | 14990,   | 192602, | 2982.7973, |
| 7.465885 |         |            | 7.460004 |         |            | 7.454124 |         |            |
| 14915,   | 195390, | 2987.4419, | 14953,   | 191728, | 2985.0886, | 14991,   | 192944, | 2982.7354, |
| 7.465730 |         |            | 7.459850 |         |            | 7.453969 |         |            |
| 14916,   | 195552, | 2987.3799, | 14954,   | 192026, | 2985.0267, | 14992,   | 193156, | 2982.6735, |
| 7.465576 |         |            | 7.459695 |         |            | 7.453814 |         |            |
| 14917,   | 195158, | 2987.3180, | 14955,   | 192198, | 2984.9648, | 14993,   | 192976, | 2982.6116, |
| 7.465421 |         |            | 7.459540 |         |            | 7.453659 |         |            |
| 14918,   | 194314, | 2987.2561, | 14956,   | 192116, | 2984.9029, | 14994,   | 192462, | 2982.5496, |
| 7.465266 |         |            | 7.459385 |         |            | 7.453505 |         |            |
| 14919,   | 193490, | 2987.1942, | 14957,   | 191986, | 2984.8409, | 14995,   | 192022, | 2982.4877, |
| 7.465111 |         |            | 7.459231 |         |            | 7.453350 |         |            |
| 14920,   | 193128, | 2987.1322, | 14958,   | 192130, | 2984.7790, | 14996,   | 192048, | 2982.4258, |
| 7.464957 |         |            | 7.459076 |         |            | 7.453195 |         |            |
| 14921,   | 193266, | 2987.0703, | 14959,   | 192620, | 2984.7171, | 14997,   | 192582, | 2982.3639, |
| 7.464802 |         |            | 7.458921 |         |            | 7.453040 |         |            |
| 14922,   | 193568, | 2987.0084, | 14960,   | 193226, | 2984.6552, | 14998,   | 193270, | 2982.3019, |
| 7.464647 |         |            | 7.458766 |         |            | 7.452885 |         |            |
| 14923,   | 193714, | 2986.9465, | 14961,   | 193670, | 2984.5932, | 14999,   | 193714, | 2982.2400, |
| 7.464492 |         |            | 7.458612 |         |            | 7.452731 |         |            |
| 14924,   | 193710, | 2986.8845, | 14962,   | 193920, | 2984.5313, | 15000,   | 193764, | 2982.1781, |
| 7.464338 |         |            | 7.458457 |         |            | 7.452576 |         |            |
| 14925,   | 193748, | 2986.8226, | 14963,   | 194138, | 2984.4694, | 15001,   | 193610, | 2982.1162, |
| 7.464183 |         |            | 7.458302 |         |            | 7.452421 |         |            |
| 14926,   | 193870, | 2986.7607, | 14964,   | 194370, | 2984.4074, | 15002,   | 193474, | 2982.0542, |
| 7.464028 |         |            | 7.458147 |         |            | 7.452266 |         |            |
| 14927,   | 193806, | 2986.6987, | 14965,   | 194402, | 2984.3455, | 15003,   | 193476, | 2981.9923, |
| 7.463873 |         |            | 7.457992 |         |            | 7.452112 |         |            |
| 14928,   | 193282, | 2986.6368, | 14966,   | 193954, | 2984.2836, | 15004,   | 193614, | 2981.9304, |
| 7.463719 |         |            | 7.457838 |         |            | 7.451957 |         |            |
| 14929,   | 192406, | 2986.5749, | 14967,   | 193056, | 2984.2217, | 15005,   | 193890, | 2981.8684, |
| 7.463564 |         |            | 7.457683 |         |            | 7.451802 |         |            |
| 14930,   | 191642, | 2986.5130, | 14968,   | 192086, | 2984.1597, | 15006,   | 194338, | 2981.8065, |
| 7.463409 |         |            | 7.457528 |         |            | 7.451647 |         |            |
| 14931,   | 191414, | 2986.4510, | 14969,   | 191466, | 2984.0978, | 15007,   | 194896, | 2981.7446, |
| 7.463254 |         |            | 7.457373 |         |            | 7.451493 |         |            |
| 14932,   | 191722, | 2986.3891, | 14970,   | 191286, | 2984.0359, | 15008,   | 195372, | 2981.6827, |
| 7.463099 |         |            | 7.457219 |         |            | 7.451338 |         |            |
| 14933,   | 192212, | 2986.3272, | 14971,   | 191300, | 2983.9740, | 15009,   | 195546, | 2981.6207, |
| 7.462945 |         |            | 7.457064 |         |            | 7.451183 |         |            |
| 14934,   | 192594, | 2986.2653, | 14972,   | 191232, | 2983.9120, | 15010,   | 195406, | 2981.5588, |
| 7.462790 |         |            | 7.456909 |         |            | 7.451028 |         |            |
| 14935,   | 192912, | 2986.2033, | 14973,   | 191098, | 2983.8501, | 15011,   | 195148, | 2981.4969, |
| 7.462635 |         |            | 7.456754 |         |            | 7.450874 |         |            |
| 14936,   | 193372, | 2986.1414, | 14974,   | 191120, | 2983.7882, | 15012,   | 194978, | 2981.4350, |
| 7.462480 |         |            | 7.456600 |         |            | 7.450719 |         |            |
| 14937,   | 193936, | 2986.0795, | 14975,   | 191394, | 2983.7263, | 15013,   | 194880, | 2981.3730, |
| 7.462326 |         |            | 7.456445 |         |            | 7.450564 |         |            |
| 14938,   | 194266, | 2986.0175, | 14976,   | 191748, | 2983.6643, | 15014,   | 194668, | 2981.3111, |
| 7.462171 |         |            | 7.456290 |         |            | 7.450409 |         |            |
| 14939,   | 194066, | 2985.9556, | 14977,   | 191926, | 2983.6024, | 15015,   | 194210, | 2981.2492, |
| 7.462016 |         |            | 7.456135 |         |            | 7.450255 |         |            |
| 14940,   | 193482, | 2985.8937, | 14978,   | 191902, | 2983.5405, | 15016,   | 193646, | 2981.1872, |
| 7.461861 |         |            | 7.455981 |         |            | 7.450100 |         |            |
| 14941,   | 193050, | 2985.8318, | 14979,   | 191942, | 2983.4785, | 15017,   | 193236, | 2981.1253, |
| 7.461707 |         |            | 7.455826 |         |            | 7.449945 |         |            |
| 14942,   | 193168, | 2985.7698, | 14980,   | 192312, | 2983.4166, | 15018,   | 193138, | 2981.0634, |
| 7.461552 |         |            | 7.455671 |         |            | 7.449790 |         |            |

|          |         |            |          |         |            |          |         |            |
|----------|---------|------------|----------|---------|------------|----------|---------|------------|
| 15019,   | 193280, | 2981.0015, | 15057,   | 192858, | 2978.6482, | 15095,   | 193954, | 2976.2950, |
| 7.449636 |         |            | 7.443755 |         |            | 7.437874 |         |            |
| 15020,   | 193512, | 2980.9395, | 15058,   | 192818, | 2978.5863, | 15096,   | 194310, | 2976.2331, |
| 7.449481 |         |            | 7.443600 |         |            | 7.437719 |         |            |
| 15021,   | 193802, | 2980.8776, | 15059,   | 192876, | 2978.5244, | 15097,   | 194508, | 2976.1712, |
| 7.449326 |         |            | 7.443445 |         |            | 7.437564 |         |            |
| 15022,   | 194218, | 2980.8157, | 15060,   | 193082, | 2978.4625, | 15098,   | 194686, | 2976.1092, |
| 7.449171 |         |            | 7.443290 |         |            | 7.437410 |         |            |
| 15023,   | 194736, | 2980.7538, | 15061,   | 193504, | 2978.4005, | 15099,   | 194918, | 2976.0473, |
| 7.449017 |         |            | 7.443136 |         |            | 7.437255 |         |            |
| 15024,   | 195116, | 2980.6918, | 15062,   | 194022, | 2978.3386, | 15100,   | 195044, | 2975.9854, |
| 7.448862 |         |            | 7.442981 |         |            | 7.437100 |         |            |
| 15025,   | 195108, | 2980.6299, | 15063,   | 194360, | 2978.2767, | 15101,   | 194836, | 2975.9235, |
| 7.448707 |         |            | 7.442826 |         |            | 7.436945 |         |            |
| 15026,   | 194722, | 2980.5680, | 15064,   | 194348, | 2978.2148, | 15102,   | 194296, | 2975.8615, |
| 7.448552 |         |            | 7.442671 |         |            | 7.436791 |         |            |
| 15027,   | 194290, | 2980.5061, | 15065,   | 194124, | 2978.1528, | 15103,   | 193730, | 2975.7996, |
| 7.448397 |         |            | 7.442517 |         |            | 7.436636 |         |            |
| 15028,   | 194144, | 2980.4441, | 15066,   | 193966, | 2978.0909, | 15104,   | 193528, | 2975.7377, |
| 7.448243 |         |            | 7.442362 |         |            | 7.436481 |         |            |
| 15029,   | 194282, | 2980.3822, | 15067,   | 194044, | 2978.0290, | 15105,   | 193792, | 2975.6758, |
| 7.448088 |         |            | 7.442207 |         |            | 7.436326 |         |            |
| 15030,   | 194372, | 2980.3203, | 15068,   | 194240, | 2977.9670, | 15106,   | 194268, | 2975.6138, |
| 7.447933 |         |            | 7.442052 |         |            | 7.436172 |         |            |
| 15031,   | 194170, | 2980.2583, | 15069,   | 194306, | 2977.9051, | 15107,   | 194616, | 2975.5519, |
| 7.447778 |         |            | 7.441898 |         |            | 7.436017 |         |            |
| 15032,   | 193842, | 2980.1964, | 15070,   | 194148, | 2977.8432, | 15108,   | 194718, | 2975.4900, |
| 7.447624 |         |            | 7.441743 |         |            | 7.435862 |         |            |
| 15033,   | 193842, | 2980.1345, | 15071,   | 193856, | 2977.7813, | 15109,   | 194710, | 2975.4280, |
| 7.447469 |         |            | 7.441588 |         |            | 7.435707 |         |            |
| 15034,   | 194450, | 2980.0726, | 15072,   | 193544, | 2977.7193, | 15110,   | 194754, | 2975.3661, |
| 7.447314 |         |            | 7.441433 |         |            | 7.435553 |         |            |
| 15035,   | 195444, | 2980.0106, | 15073,   | 193224, | 2977.6574, | 15111,   | 194844, | 2975.3042, |
| 7.447159 |         |            | 7.441279 |         |            | 7.435398 |         |            |
| 15036,   | 196302, | 2979.9487, | 15074,   | 192876, | 2977.5955, | 15112,   | 194862, | 2975.2423, |
| 7.447005 |         |            | 7.441124 |         |            | 7.435243 |         |            |
| 15037,   | 196688, | 2979.8868, | 15075,   | 192614, | 2977.5336, | 15113,   | 194756, | 2975.1803, |
| 7.446850 |         |            | 7.440969 |         |            | 7.435088 |         |            |
| 15038,   | 196700, | 2979.8249, | 15076,   | 192664, | 2977.4716, | 15114,   | 194592, | 2975.1184, |
| 7.446695 |         |            | 7.440814 |         |            | 7.434934 |         |            |
| 15039,   | 196682, | 2979.7629, | 15077,   | 193106, | 2977.4097, | 15115,   | 194422, | 2975.0565, |
| 7.446540 |         |            | 7.440660 |         |            | 7.434779 |         |            |
| 15040,   | 196764, | 2979.7010, | 15078,   | 193654, | 2977.3478, | 15116,   | 194132, | 2974.9946, |
| 7.446386 |         |            | 7.440505 |         |            | 7.434624 |         |            |
| 15041,   | 196766, | 2979.6391, | 15079,   | 193824, | 2977.2859, | 15117,   | 193576, | 2974.9326, |
| 7.446231 |         |            | 7.440350 |         |            | 7.434469 |         |            |
| 15042,   | 196442, | 2979.5771, | 15080,   | 193370, | 2977.2239, | 15118,   | 192792, | 2974.8707, |
| 7.446076 |         |            | 7.440195 |         |            | 7.434315 |         |            |
| 15043,   | 195802, | 2979.5152, | 15081,   | 192544, | 2977.1620, | 15119,   | 192074, | 2974.8088, |
| 7.445921 |         |            | 7.440041 |         |            | 7.434160 |         |            |
| 15044,   | 195106, | 2979.4533, | 15082,   | 191922, | 2977.1001, | 15120,   | 191754, | 2974.7469, |
| 7.445767 |         |            | 7.439886 |         |            | 7.434005 |         |            |
| 15045,   | 194570, | 2979.3914, | 15083,   | 191904, | 2977.0381, | 15121,   | 191882, | 2974.6849, |
| 7.445612 |         |            | 7.439731 |         |            | 7.433850 |         |            |
| 15046,   | 194140, | 2979.3294, | 15084,   | 192400, | 2976.9762, | 15122,   | 192174, | 2974.6230, |
| 7.445457 |         |            | 7.439576 |         |            | 7.433696 |         |            |
| 15047,   | 193664, | 2979.2675, | 15085,   | 192970, | 2976.9143, | 15123,   | 192306, | 2974.5611, |
| 7.445302 |         |            | 7.439422 |         |            | 7.433541 |         |            |
| 15048,   | 193204, | 2979.2056, | 15086,   | 193258, | 2976.8524, | 15124,   | 192230, | 2974.4991, |
| 7.445148 |         |            | 7.439267 |         |            | 7.433386 |         |            |
| 15049,   | 193076, | 2979.1437, | 15087,   | 193248, | 2976.7904, | 15125,   | 192178, | 2974.4372, |
| 7.444993 |         |            | 7.439112 |         |            | 7.433231 |         |            |
| 15050,   | 193534, | 2979.0817, | 15088,   | 193132, | 2976.7285, | 15126,   | 192372, | 2974.3753, |
| 7.444838 |         |            | 7.438957 |         |            | 7.433076 |         |            |
| 15051,   | 194400, | 2979.0198, | 15089,   | 193048, | 2976.6666, | 15127,   | 192766, | 2974.3134, |
| 7.444683 |         |            | 7.438803 |         |            | 7.432922 |         |            |
| 15052,   | 195112, | 2978.9579, | 15090,   | 192972, | 2976.6047, | 15128,   | 193136, | 2974.2514, |
| 7.444529 |         |            | 7.438648 |         |            | 7.432767 |         |            |
| 15053,   | 195176, | 2978.8960, | 15091,   | 192860, | 2976.5427, | 15129,   | 193314, | 2974.1895, |
| 7.444374 |         |            | 7.438493 |         |            | 7.432612 |         |            |
| 15054,   | 194578, | 2978.8340, | 15092,   | 192824, | 2976.4808, | 15130,   | 193350, | 2974.1276, |
| 7.444219 |         |            | 7.438338 |         |            | 7.432457 |         |            |
| 15055,   | 193742, | 2978.7721, | 15093,   | 193018, | 2976.4189, | 15131,   | 193354, | 2974.0657, |
| 7.444064 |         |            | 7.438183 |         |            | 7.432303 |         |            |
| 15056,   | 193120, | 2978.7102, | 15094,   | 193456, | 2976.3570, | 15132,   | 193312, | 2974.0037, |
| 7.443910 |         |            | 7.438029 |         |            | 7.432148 |         |            |



|          |         |            |          |         |            |          |         |            |
|----------|---------|------------|----------|---------|------------|----------|---------|------------|
| 15133,   | 193080, | 2973.9418, | 15171,   | 193038, | 2971.5886, | 15209,   | 194576, | 2969.2354, |
| 7.431993 |         |            | 7.426112 |         |            | 7.420232 |         |            |
| 15134,   | 192646, | 2973.8799, | 15172,   | 193756, | 2971.5267, | 15210,   | 194856, | 2969.1734, |
| 7.431838 |         |            | 7.425958 |         |            | 7.420077 |         |            |
| 15135,   | 192256, | 2973.8179, | 15173,   | 194164, | 2971.4647, | 15211,   | 194912, | 2969.1115, |
| 7.431684 |         |            | 7.425803 |         |            | 7.419922 |         |            |
| 15136,   | 192252, | 2973.7560, | 15174,   | 194300, | 2971.4028, | 15212,   | 194922, | 2969.0496, |
| 7.431529 |         |            | 7.425648 |         |            | 7.419767 |         |            |
| 15137,   | 192718, | 2973.6941, | 15175,   | 194256, | 2971.3409, | 15213,   | 195046, | 2968.9876, |
| 7.431374 |         |            | 7.425493 |         |            | 7.419613 |         |            |
| 15138,   | 193378, | 2973.6322, | 15176,   | 194036, | 2971.2789, | 15214,   | 195246, | 2968.9257, |
| 7.431219 |         |            | 7.425339 |         |            | 7.419458 |         |            |
| 15139,   | 193858, | 2973.5702, | 15177,   | 193620, | 2971.2170, | 15215,   | 195422, | 2968.8638, |
| 7.431065 |         |            | 7.425184 |         |            | 7.419303 |         |            |
| 15140,   | 194064, | 2973.5083, | 15178,   | 193122, | 2971.1551, | 15216,   | 195584, | 2968.8019, |
| 7.430910 |         |            | 7.425029 |         |            | 7.419148 |         |            |
| 15141,   | 194252, | 2973.4464, | 15179,   | 192790, | 2971.0932, | 15217,   | 195816, | 2968.7399, |
| 7.430755 |         |            | 7.424874 |         |            | 7.418994 |         |            |
| 15142,   | 194702, | 2973.3845, | 15180,   | 192826, | 2971.0312, | 15218,   | 196066, | 2968.6780, |
| 7.430600 |         |            | 7.424720 |         |            | 7.418839 |         |            |
| 15143,   | 195344, | 2973.3225, | 15181,   | 193180, | 2970.9693, | 15219,   | 196072, | 2968.6161, |
| 7.430446 |         |            | 7.424565 |         |            | 7.418684 |         |            |
| 15144,   | 195814, | 2973.2606, | 15182,   | 193598, | 2970.9074, | 15220,   | 195596, | 2968.5542, |
| 7.430291 |         |            | 7.424410 |         |            | 7.418529 |         |            |
| 15145,   | 195808, | 2973.1987, | 15183,   | 193890, | 2970.8455, | 15221,   | 194736, | 2968.4922, |
| 7.430136 |         |            | 7.424255 |         |            | 7.418375 |         |            |
| 15146,   | 195430, | 2973.1368, | 15184,   | 194042, | 2970.7835, | 15222,   | 193922, | 2968.4303, |
| 7.429981 |         |            | 7.424101 |         |            | 7.418220 |         |            |
| 15147,   | 195048, | 2973.0748, | 15185,   | 194206, | 2970.7216, | 15223,   | 193536, | 2968.3684, |
| 7.429827 |         |            | 7.423946 |         |            | 7.418065 |         |            |
| 15148,   | 194970, | 2973.0129, | 15186,   | 194460, | 2970.6597, | 15224,   | 193550, | 2968.3065, |
| 7.429672 |         |            | 7.423791 |         |            | 7.417910 |         |            |
| 15149,   | 195146, | 2972.9510, | 15187,   | 194764, | 2970.5977, | 15225,   | 193564, | 2968.2445, |
| 7.429517 |         |            | 7.423636 |         |            | 7.417755 |         |            |
| 15150,   | 195306, | 2972.8890, | 15188,   | 195038, | 2970.5358, | 15226,   | 193282, | 2968.1826, |
| 7.429362 |         |            | 7.423482 |         |            | 7.417601 |         |            |
| 15151,   | 195268, | 2972.8271, | 15189,   | 195250, | 2970.4739, | 15227,   | 192822, | 2968.1207, |
| 7.429208 |         |            | 7.423327 |         |            | 7.417446 |         |            |
| 15152,   | 195066, | 2972.7652, | 15190,   | 195370, | 2970.4120, | 15228,   | 192586, | 2968.0587, |
| 7.429053 |         |            | 7.423172 |         |            | 7.417291 |         |            |
| 15153,   | 194826, | 2972.7033, | 15191,   | 195278, | 2970.3500, | 15229,   | 192800, | 2967.9968, |
| 7.428898 |         |            | 7.423017 |         |            | 7.417136 |         |            |
| 15154,   | 194566, | 2972.6413, | 15192,   | 194846, | 2970.2881, | 15230,   | 193274, | 2967.9349, |
| 7.428743 |         |            | 7.422862 |         |            | 7.416982 |         |            |
| 15155,   | 194238, | 2972.5794, | 15193,   | 194156, | 2970.2262, | 15231,   | 193606, | 2967.8730, |
| 7.428589 |         |            | 7.422708 |         |            | 7.416827 |         |            |
| 15156,   | 193870, | 2972.5175, | 15194,   | 193600, | 2970.1643, | 15232,   | 193638, | 2967.8110, |
| 7.428434 |         |            | 7.422553 |         |            | 7.416672 |         |            |
| 15157,   | 193642, | 2972.4556, | 15195,   | 193610, | 2970.1023, | 15233,   | 193578, | 2967.7491, |
| 7.428279 |         |            | 7.422398 |         |            | 7.416517 |         |            |
| 15158,   | 193676, | 2972.3936, | 15196,   | 194254, | 2970.0404, | 15234,   | 193700, | 2967.6872, |
| 7.428124 |         |            | 7.422243 |         |            | 7.416363 |         |            |
| 15159,   | 193812, | 2972.3317, | 15197,   | 195064, | 2969.9785, | 15235,   | 193990, | 2967.6253, |
| 7.427969 |         |            | 7.422089 |         |            | 7.416208 |         |            |
| 15160,   | 193684, | 2972.2698, | 15198,   | 195408, | 2969.9166, | 15236,   | 194138, | 2967.5633, |
| 7.427815 |         |            | 7.421934 |         |            | 7.416053 |         |            |
| 15161,   | 193076, | 2972.2078, | 15199,   | 195050, | 2969.8546, | 15237,   | 193904, | 2967.5014, |
| 7.427660 |         |            | 7.421779 |         |            | 7.415898 |         |            |
| 15162,   | 192178, | 2972.1459, | 15200,   | 194394, | 2969.7927, | 15238,   | 193432, | 2967.4395, |
| 7.427505 |         |            | 7.421624 |         |            | 7.415744 |         |            |
| 15163,   | 191460, | 2972.0840, | 15201,   | 194068, | 2969.7308, | 15239,   | 193096, | 2967.3775, |
| 7.427350 |         |            | 7.421470 |         |            | 7.415589 |         |            |
| 15164,   | 191236, | 2972.0221, | 15202,   | 194320, | 2969.6688, | 15240,   | 193112, | 2967.3156, |
| 7.427196 |         |            | 7.421315 |         |            | 7.415434 |         |            |
| 15165,   | 191390, | 2971.9601, | 15203,   | 194802, | 2969.6069, | 15241,   | 193298, | 2967.2537, |
| 7.427041 |         |            | 7.421160 |         |            | 7.415279 |         |            |
| 15166,   | 191550, | 2971.8982, | 15204,   | 194960, | 2969.5450, | 15242,   | 193304, | 2967.1918, |
| 7.426886 |         |            | 7.421005 |         |            | 7.415125 |         |            |
| 15167,   | 191496, | 2971.8363, | 15205,   | 194610, | 2969.4831, | 15243,   | 192980, | 2967.1298, |
| 7.426731 |         |            | 7.420851 |         |            | 7.414970 |         |            |
| 15168,   | 191392, | 2971.7744, | 15206,   | 194096, | 2969.4211, | 15244,   | 192516, | 2967.0679, |
| 7.426577 |         |            | 7.420696 |         |            | 7.414815 |         |            |
| 15169,   | 191576, | 2971.7124, | 15207,   | 193892, | 2969.3592, | 15245,   | 192198, | 2967.0060, |
| 7.426422 |         |            | 7.420541 |         |            | 7.414660 |         |            |
| 15170,   | 192194, | 2971.6505, | 15208,   | 194142, | 2969.2973, | 15246,   | 192142, | 2966.9441, |
| 7.426267 |         |            | 7.420386 |         |            | 7.414506 |         |            |

|          |         |            |          |         |            |          |         |            |
|----------|---------|------------|----------|---------|------------|----------|---------|------------|
| 15247,   | 192298, | 2966.8821, | 15285,   | 194778, | 2964.5289, | 15323,   | 193124, | 2962.1757, |
| 7.414351 |         |            | 7.408470 |         |            | 7.402589 |         |            |
| 15248,   | 192670, | 2966.8202, | 15286,   | 194152, | 2964.4670, | 15324,   | 193286, | 2962.1138, |
| 7.414196 |         |            | 7.408315 |         |            | 7.402434 |         |            |
| 15249,   | 193376, | 2966.7583, | 15287,   | 193562, | 2964.4051, | 15325,   | 193336, | 2962.0518, |
| 7.414041 |         |            | 7.408161 |         |            | 7.402280 |         |            |
| 15250,   | 194478, | 2966.6964, | 15288,   | 193330, | 2964.3431, | 15326,   | 193360, | 2961.9899, |
| 7.413887 |         |            | 7.408006 |         |            | 7.402125 |         |            |
| 15251,   | 195730, | 2966.6344, | 15289,   | 193382, | 2964.2812, | 15327,   | 193318, | 2961.9280, |
| 7.413732 |         |            | 7.407851 |         |            | 7.401970 |         |            |
| 15252,   | 196664, | 2966.5725, | 15290,   | 193318, | 2964.2193, | 15328,   | 193018, | 2961.8661, |
| 7.413577 |         |            | 7.407696 |         |            | 7.401815 |         |            |
| 15253,   | 196962, | 2966.5106, | 15291,   | 192892, | 2964.1574, | 15329,   | 192420, | 2961.8041, |
| 7.413422 |         |            | 7.407541 |         |            | 7.401661 |         |            |
| 15254,   | 196756, | 2966.4486, | 15292,   | 192372, | 2964.0954, | 15330,   | 191844, | 2961.7422, |
| 7.413268 |         |            | 7.407387 |         |            | 7.401506 |         |            |
| 15255,   | 196472, | 2966.3867, | 15293,   | 192316, | 2964.0335, | 15331,   | 191786, | 2961.6803, |
| 7.413113 |         |            | 7.407232 |         |            | 7.401351 |         |            |
| 15256,   | 196410, | 2966.3248, | 15294,   | 192998, | 2963.9716, | 15332,   | 192420, | 2961.6183, |
| 7.412958 |         |            | 7.407077 |         |            | 7.401196 |         |            |
| 15257,   | 196472, | 2966.2629, | 15295,   | 194118, | 2963.9096, | 15333,   | 193390, | 2961.5564, |
| 7.412803 |         |            | 7.406922 |         |            | 7.401042 |         |            |
| 15258,   | 196368, | 2966.2009, | 15296,   | 195118, | 2963.8477, | 15334,   | 194088, | 2961.4945, |
| 7.412648 |         |            | 7.406768 |         |            | 7.400887 |         |            |
| 15259,   | 196000, | 2966.1390, | 15297,   | 195742, | 2963.7858, | 15335,   | 194246, | 2961.4326, |
| 7.412494 |         |            | 7.406613 |         |            | 7.400732 |         |            |
| 15260,   | 195588, | 2966.0771, | 15298,   | 196232, | 2963.7239, | 15336,   | 194158, | 2961.3706, |
| 7.412339 |         |            | 7.406458 |         |            | 7.400577 |         |            |
| 15261,   | 195430, | 2966.0152, | 15299,   | 196916, | 2963.6619, | 15337,   | 194328, | 2961.3087, |
| 7.412184 |         |            | 7.406303 |         |            | 7.400423 |         |            |
| 15262,   | 195548, | 2965.9532, | 15300,   | 197704, | 2963.6000, | 15338,   | 194926, | 2961.2468, |
| 7.412029 |         |            | 7.406149 |         |            | 7.400268 |         |            |
| 15263,   | 195710, | 2965.8913, | 15301,   | 198122, | 2963.5381, | 15339,   | 195666, | 2961.1849, |
| 7.411875 |         |            | 7.405994 |         |            | 7.400113 |         |            |
| 15264,   | 195746, | 2965.8294, | 15302,   | 197814, | 2963.4762, | 15340,   | 196136, | 2961.1229, |
| 7.411720 |         |            | 7.405839 |         |            | 7.399958 |         |            |
| 15265,   | 195764, | 2965.7674, | 15303,   | 197042, | 2963.4142, | 15341,   | 196300, | 2961.0610, |
| 7.411565 |         |            | 7.405684 |         |            | 7.399804 |         |            |
| 15266,   | 195954, | 2965.7055, | 15304,   | 196470, | 2963.3523, | 15342,   | 196482, | 2960.9991, |
| 7.411410 |         |            | 7.405530 |         |            | 7.399649 |         |            |
| 15267,   | 196256, | 2965.6436, | 15305,   | 196524, | 2963.2904, | 15343,   | 196968, | 2960.9372, |
| 7.411256 |         |            | 7.405375 |         |            | 7.399494 |         |            |
| 15268,   | 196318, | 2965.5817, | 15306,   | 197006, | 2963.2284, | 15344,   | 197636, | 2960.8752, |
| 7.411101 |         |            | 7.405220 |         |            | 7.399339 |         |            |
| 15269,   | 195846, | 2965.5197, | 15307,   | 197308, | 2963.1665, | 15345,   | 198068, | 2960.8133, |
| 7.410946 |         |            | 7.405065 |         |            | 7.399185 |         |            |
| 15270,   | 195010, | 2965.4578, | 15308,   | 197084, | 2963.1046, | 15346,   | 197970, | 2960.7514, |
| 7.410791 |         |            | 7.404911 |         |            | 7.399030 |         |            |
| 15271,   | 194388, | 2965.3959, | 15309,   | 196534, | 2963.0427, | 15347,   | 197482, | 2960.6894, |
| 7.410637 |         |            | 7.404756 |         |            | 7.398875 |         |            |
| 15272,   | 194446, | 2965.3340, | 15310,   | 196170, | 2962.9807, | 15348,   | 196998, | 2960.6275, |
| 7.410482 |         |            | 7.404601 |         |            | 7.398720 |         |            |
| 15273,   | 195086, | 2965.2720, | 15311,   | 196222, | 2962.9188, | 15349,   | 196790, | 2960.5656, |
| 7.410327 |         |            | 7.404446 |         |            | 7.398566 |         |            |
| 15274,   | 195758, | 2965.2101, | 15312,   | 196488, | 2962.8569, | 15350,   | 196838, | 2960.5037, |
| 7.410172 |         |            | 7.404292 |         |            | 7.398411 |         |            |
| 15275,   | 195990, | 2965.1482, | 15313,   | 196620, | 2962.7950, | 15351,   | 196964, | 2960.4417, |
| 7.410018 |         |            | 7.404137 |         |            | 7.398256 |         |            |
| 15276,   | 195788, | 2965.0863, | 15314,   | 196508, | 2962.7330, | 15352,   | 197124, | 2960.3798, |
| 7.409863 |         |            | 7.403982 |         |            | 7.398101 |         |            |
| 15277,   | 195500, | 2965.0243, | 15315,   | 196296, | 2962.6711, | 15353,   | 197350, | 2960.3179, |
| 7.409708 |         |            | 7.403827 |         |            | 7.397946 |         |            |
| 15278,   | 195392, | 2964.9624, | 15316,   | 196088, | 2962.6092, | 15354,   | 197590, | 2960.2560, |
| 7.409553 |         |            | 7.403673 |         |            | 7.397792 |         |            |
| 15279,   | 195406, | 2964.9005, | 15317,   | 195750, | 2962.5473, | 15355,   | 197580, | 2960.1940, |
| 7.409399 |         |            | 7.403518 |         |            | 7.397637 |         |            |
| 15280,   | 195338, | 2964.8385, | 15318,   | 195076, | 2962.4853, | 15356,   | 197076, | 2960.1321, |
| 7.409244 |         |            | 7.403363 |         |            | 7.397482 |         |            |
| 15281,   | 195170, | 2964.7766, | 15319,   | 194122, | 2962.4234, | 15357,   | 196162, | 2960.0702, |
| 7.409089 |         |            | 7.403208 |         |            | 7.397327 |         |            |
| 15282,   | 195066, | 2964.7147, | 15320,   | 193254, | 2962.3615, | 15358,   | 195298, | 2960.0082, |
| 7.408934 |         |            | 7.403053 |         |            | 7.397173 |         |            |
| 15283,   | 195108, | 2964.6528, | 15321,   | 192830, | 2962.2995, | 15359,   | 194994, | 2959.9463, |
| 7.408780 |         |            | 7.402899 |         |            | 7.397018 |         |            |
| 15284,   | 195102, | 2964.5908, | 15322,   | 192882, | 2962.2376, | 15360,   | 195406, | 2959.8844, |
| 7.408625 |         |            | 7.402744 |         |            | 7.396863 |         |            |

|          |         |            |          |         |            |          |         |            |
|----------|---------|------------|----------|---------|------------|----------|---------|------------|
| 15361,   | 196262, | 2959.8225, | 15399,   | 194554, | 2957.4692, | 15437,   | 196498, | 2955.1160, |
| 7.396708 |         |            | 7.390828 |         |            | 7.384947 |         |            |
| 15362,   | 197136, | 2959.7605, | 15400,   | 194280, | 2957.4073, | 15438,   | 196216, | 2955.0541, |
| 7.396554 |         |            | 7.390673 |         |            | 7.384792 |         |            |
| 15363,   | 197774, | 2959.6986, | 15401,   | 194388, | 2957.3454, | 15439,   | 195922, | 2954.9922, |
| 7.396399 |         |            | 7.390518 |         |            | 7.384637 |         |            |
| 15364,   | 198158, | 2959.6367, | 15402,   | 194836, | 2957.2835, | 15440,   | 195802, | 2954.9302, |
| 7.396244 |         |            | 7.390363 |         |            | 7.384483 |         |            |
| 15365,   | 198350, | 2959.5748, | 15403,   | 195348, | 2957.2215, | 15441,   | 195834, | 2954.8683, |
| 7.396089 |         |            | 7.390209 |         |            | 7.384328 |         |            |
| 15366,   | 198346, | 2959.5128, | 15404,   | 195616, | 2957.1596, | 15442,   | 195882, | 2954.8064, |
| 7.395935 |         |            | 7.390054 |         |            | 7.384173 |         |            |
| 15367,   | 198100, | 2959.4509, | 15405,   | 195572, | 2957.0977, | 15443,   | 195910, | 2954.7445, |
| 7.395780 |         |            | 7.389899 |         |            | 7.384018 |         |            |
| 15368,   | 197642, | 2959.3890, | 15406,   | 195424, | 2957.0358, | 15444,   | 196012, | 2954.6825, |
| 7.395625 |         |            | 7.389744 |         |            | 7.383864 |         |            |
| 15369,   | 197088, | 2959.3271, | 15407,   | 195450, | 2956.9738, | 15445,   | 196174, | 2954.6206, |
| 7.395470 |         |            | 7.389590 |         |            | 7.383709 |         |            |
| 15370,   | 196550, | 2959.2651, | 15408,   | 195740, | 2956.9119, | 15446,   | 196126, | 2954.5587, |
| 7.395316 |         |            | 7.389435 |         |            | 7.383554 |         |            |
| 15371,   | 196050, | 2959.2032, | 15409,   | 196188, | 2956.8500, | 15447,   | 195520, | 2954.4968, |
| 7.395161 |         |            | 7.389280 |         |            | 7.383399 |         |            |
| 15372,   | 195608, | 2959.1413, | 15410,   | 196704, | 2956.7880, | 15448,   | 194364, | 2954.4348, |
| 7.395006 |         |            | 7.389125 |         |            | 7.383245 |         |            |
| 15373,   | 195350, | 2959.0793, | 15411,   | 197320, | 2956.7261, | 15449,   | 193206, | 2954.3729, |
| 7.394851 |         |            | 7.388971 |         |            | 7.383090 |         |            |
| 15374,   | 195458, | 2959.0174, | 15412,   | 198080, | 2956.6642, | 15450,   | 192784, | 2954.3110, |
| 7.394697 |         |            | 7.388816 |         |            | 7.382935 |         |            |
| 15375,   | 195978, | 2958.9555, | 15413,   | 198812, | 2956.6023, | 15451,   | 193394, | 2954.2490, |
| 7.394542 |         |            | 7.388661 |         |            | 7.382780 |         |            |
| 15376,   | 196684, | 2958.8936, | 15414,   | 199126, | 2956.5403, | 15452,   | 194632, | 2954.1871, |
| 7.394387 |         |            | 7.388506 |         |            | 7.382625 |         |            |
| 15377,   | 197224, | 2958.8316, | 15415,   | 198718, | 2956.4784, | 15453,   | 195768, | 2954.1252, |
| 7.394232 |         |            | 7.388352 |         |            | 7.382471 |         |            |
| 15378,   | 197424, | 2958.7697, | 15416,   | 197682, | 2956.4165, | 15454,   | 196352, | 2954.0633, |
| 7.394078 |         |            | 7.388197 |         |            | 7.382316 |         |            |
| 15379,   | 197458, | 2958.7078, | 15417,   | 196468, | 2956.3546, | 15455,   | 196492, | 2954.0013, |
| 7.393923 |         |            | 7.388042 |         |            | 7.382161 |         |            |
| 15380,   | 197658, | 2958.6459, | 15418,   | 195516, | 2956.2926, | 15456,   | 196550, | 2953.9394, |
| 7.393768 |         |            | 7.387887 |         |            | 7.382006 |         |            |
| 15381,   | 198208, | 2958.5839, | 15419,   | 194948, | 2956.2307, | 15457,   | 196678, | 2953.8775, |
| 7.393613 |         |            | 7.387732 |         |            | 7.381852 |         |            |
| 15382,   | 198958, | 2958.5220, | 15420,   | 194572, | 2956.1688, | 15458,   | 196698, | 2953.8156, |
| 7.393459 |         |            | 7.387578 |         |            | 7.381697 |         |            |
| 15383,   | 199564, | 2958.4601, | 15421,   | 194256, | 2956.1069, | 15459,   | 196382, | 2953.7536, |
| 7.393304 |         |            | 7.387423 |         |            | 7.381542 |         |            |
| 15384,   | 199810, | 2958.3981, | 15422,   | 194066, | 2956.0449, | 15460,   | 195822, | 2953.6917, |
| 7.393149 |         |            | 7.387268 |         |            | 7.381387 |         |            |
| 15385,   | 199712, | 2958.3362, | 15423,   | 194138, | 2955.9830, | 15461,   | 195352, | 2953.6298, |
| 7.392994 |         |            | 7.387113 |         |            | 7.381233 |         |            |
| 15386,   | 199422, | 2958.2743, | 15424,   | 194392, | 2955.9211, | 15462,   | 195252, | 2953.5678, |
| 7.392839 |         |            | 7.386959 |         |            | 7.381078 |         |            |
| 15387,   | 199052, | 2958.2124, | 15425,   | 194546, | 2955.8591, | 15463,   | 195500, | 2953.5059, |
| 7.392685 |         |            | 7.386804 |         |            | 7.380923 |         |            |
| 15388,   | 198628, | 2958.1504, | 15426,   | 194420, | 2955.7972, | 15464,   | 195882, | 2953.4440, |
| 7.392530 |         |            | 7.386649 |         |            | 7.380768 |         |            |
| 15389,   | 198198, | 2958.0885, | 15427,   | 194198, | 2955.7353, | 15465,   | 196274, | 2953.3821, |
| 7.392375 |         |            | 7.386494 |         |            | 7.380614 |         |            |
| 15390,   | 197878, | 2958.0266, | 15428,   | 194312, | 2955.6734, | 15466,   | 196724, | 2953.3201, |
| 7.392220 |         |            | 7.386340 |         |            | 7.380459 |         |            |
| 15391,   | 197744, | 2957.9647, | 15429,   | 194998, | 2955.6114, | 15467,   | 197296, | 2953.2582, |
| 7.392066 |         |            | 7.386185 |         |            | 7.380304 |         |            |
| 15392,   | 197734, | 2957.9027, | 15430,   | 196000, | 2955.5495, | 15468,   | 197908, | 2953.1963, |
| 7.391911 |         |            | 7.386030 |         |            | 7.380149 |         |            |
| 15393,   | 197648, | 2957.8408, | 15431,   | 196768, | 2955.4876, | 15469,   | 198352, | 2953.1344, |
| 7.391756 |         |            | 7.385875 |         |            | 7.379995 |         |            |
| 15394,   | 197340, | 2957.7789, | 15432,   | 196966, | 2955.4257, | 15470,   | 198556, | 2953.0724, |
| 7.391601 |         |            | 7.385721 |         |            | 7.379840 |         |            |
| 15395,   | 196828, | 2957.7170, | 15433,   | 196744, | 2955.3637, | 15471,   | 198668, | 2953.0105, |
| 7.391447 |         |            | 7.385566 |         |            | 7.379685 |         |            |
| 15396,   | 196222, | 2957.6550, | 15434,   | 196506, | 2955.3018, | 15472,   | 198870, | 2952.9486, |
| 7.391292 |         |            | 7.385411 |         |            | 7.379530 |         |            |
| 15397,   | 195620, | 2957.5931, | 15435,   | 196488, | 2955.2399, | 15473,   | 199148, | 2952.8867, |
| 7.391137 |         |            | 7.385256 |         |            | 7.379376 |         |            |
| 15398,   | 195050, | 2957.5312, | 15436,   | 196572, | 2955.1779, | 15474,   | 199294, | 2952.8247, |
| 7.390982 |         |            | 7.385102 |         |            | 7.379221 |         |            |

|          |         |            |          |         |            |          |         |            |
|----------|---------|------------|----------|---------|------------|----------|---------|------------|
| 15475,   | 199136, | 2952.7628, | 15513,   | 195796, | 2950.4096, | 15551,   | 194394, | 2948.0564, |
| 7.379066 |         |            | 7.373185 |         |            | 7.367304 |         |            |
| 15476,   | 198730, | 2952.7009, | 15514,   | 195572, | 2950.3477, | 15552,   | 194570, | 2947.9944, |
| 7.378911 |         |            | 7.373031 |         |            | 7.367150 |         |            |
| 15477,   | 198264, | 2952.6389, | 15515,   | 195548, | 2950.2857, | 15553,   | 194688, | 2947.9325, |
| 7.378757 |         |            | 7.372876 |         |            | 7.366995 |         |            |
| 15478,   | 197764, | 2952.5770, | 15516,   | 195922, | 2950.2238, | 15554,   | 194914, | 2947.8706, |
| 7.378602 |         |            | 7.372721 |         |            | 7.366840 |         |            |
| 15479,   | 197084, | 2952.5151, | 15517,   | 196422, | 2950.1619, | 15555,   | 195228, | 2947.8086, |
| 7.378447 |         |            | 7.372566 |         |            | 7.366685 |         |            |
| 15480,   | 196116, | 2952.4532, | 15518,   | 196554, | 2950.0999, | 15556,   | 195404, | 2947.7467, |
| 7.378292 |         |            | 7.372411 |         |            | 7.366531 |         |            |
| 15481,   | 195036, | 2952.3912, | 15519,   | 196156, | 2950.0380, | 15557,   | 195326, | 2947.6848, |
| 7.378138 |         |            | 7.372257 |         |            | 7.366376 |         |            |
| 15482,   | 194262, | 2952.3293, | 15520,   | 195594, | 2949.9761, | 15558,   | 195086, | 2947.6229, |
| 7.377983 |         |            | 7.372102 |         |            | 7.366221 |         |            |
| 15483,   | 194068, | 2952.2674, | 15521,   | 195380, | 2949.9142, | 15559,   | 194896, | 2947.5609, |
| 7.377828 |         |            | 7.371947 |         |            | 7.366066 |         |            |
| 15484,   | 194332, | 2952.2055, | 15522,   | 195642, | 2949.8522, | 15560,   | 194858, | 2947.4990, |
| 7.377673 |         |            | 7.371792 |         |            | 7.365912 |         |            |
| 15485,   | 194726, | 2952.1435, | 15523,   | 196030, | 2949.7903, | 15561,   | 194906, | 2947.4371, |
| 7.377518 |         |            | 7.371638 |         |            | 7.365757 |         |            |
| 15486,   | 195048, | 2952.0816, | 15524,   | 196124, | 2949.7284, | 15562,   | 194994, | 2947.3752, |
| 7.377364 |         |            | 7.371483 |         |            | 7.365602 |         |            |
| 15487,   | 195430, | 2952.0197, | 15525,   | 195910, | 2949.6665, | 15563,   | 195210, | 2947.3132, |
| 7.377209 |         |            | 7.371328 |         |            | 7.365447 |         |            |
| 15488,   | 196026, | 2951.9577, | 15526,   | 195716, | 2949.6045, | 15564,   | 195686, | 2947.2513, |
| 7.377054 |         |            | 7.371173 |         |            | 7.365293 |         |            |
| 15489,   | 196682, | 2951.8958, | 15527,   | 195802, | 2949.5426, | 15565,   | 196374, | 2947.1894, |
| 7.376899 |         |            | 7.371019 |         |            | 7.365138 |         |            |
| 15490,   | 196948, | 2951.8339, | 15528,   | 196026, | 2949.4807, | 15566,   | 196986, | 2947.1275, |
| 7.376745 |         |            | 7.370864 |         |            | 7.364983 |         |            |
| 15491,   | 196530, | 2951.7720, | 15529,   | 196054, | 2949.4187, | 15567,   | 197222, | 2947.0655, |
| 7.376590 |         |            | 7.370709 |         |            | 7.364828 |         |            |
| 15492,   | 195668, | 2951.7100, | 15530,   | 195768, | 2949.3568, | 15568,   | 197028, | 2947.0036, |
| 7.376435 |         |            | 7.370554 |         |            | 7.364674 |         |            |
| 15493,   | 194970, | 2951.6481, | 15531,   | 195460, | 2949.2949, | 15569,   | 196622, | 2946.9417, |
| 7.376280 |         |            | 7.370400 |         |            | 7.364519 |         |            |
| 15494,   | 194844, | 2951.5862, | 15532,   | 195492, | 2949.2330, | 15570,   | 196270, | 2946.8797, |
| 7.376126 |         |            | 7.370245 |         |            | 7.364364 |         |            |
| 15495,   | 195138, | 2951.5243, | 15533,   | 195888, | 2949.1710, | 15571,   | 196002, | 2946.8178, |
| 7.375971 |         |            | 7.370090 |         |            | 7.364209 |         |            |
| 15496,   | 195372, | 2951.4623, | 15534,   | 196312, | 2949.1091, | 15572,   | 195712, | 2946.7559, |
| 7.375816 |         |            | 7.369935 |         |            | 7.364055 |         |            |
| 15497,   | 195330, | 2951.4004, | 15535,   | 196466, | 2949.0472, | 15573,   | 195350, | 2946.6940, |
| 7.375661 |         |            | 7.369781 |         |            | 7.363900 |         |            |
| 15498,   | 195294, | 2951.3385, | 15536,   | 196412, | 2948.9853, | 15574,   | 195066, | 2946.6320, |
| 7.375507 |         |            | 7.369626 |         |            | 7.363745 |         |            |
| 15499,   | 195670, | 2951.2766, | 15537,   | 196482, | 2948.9233, | 15575,   | 195036, | 2946.5701, |
| 7.375352 |         |            | 7.369471 |         |            | 7.363590 |         |            |
| 15500,   | 196454, | 2951.2146, | 15538,   | 196850, | 2948.8614, | 15576,   | 195260, | 2946.5082, |
| 7.375197 |         |            | 7.369316 |         |            | 7.363436 |         |            |
| 15501,   | 197114, | 2951.1527, | 15539,   | 197282, | 2948.7995, | 15577,   | 195552, | 2946.4463, |
| 7.375042 |         |            | 7.369162 |         |            | 7.363281 |         |            |
| 15502,   | 197114, | 2951.0908, | 15540,   | 197386, | 2948.7376, | 15578,   | 195744, | 2946.3843, |
| 7.374888 |         |            | 7.369007 |         |            | 7.363126 |         |            |
| 15503,   | 196462, | 2951.0288, | 15541,   | 197000, | 2948.6756, | 15579,   | 195862, | 2946.3224, |
| 7.374733 |         |            | 7.368852 |         |            | 7.362971 |         |            |
| 15504,   | 195706, | 2950.9669, | 15542,   | 196356, | 2948.6137, | 15580,   | 196052, | 2946.2605, |
| 7.374578 |         |            | 7.368697 |         |            | 7.362817 |         |            |
| 15505,   | 195366, | 2950.9050, | 15543,   | 195778, | 2948.5518, | 15581,   | 196316, | 2946.1985, |
| 7.374423 |         |            | 7.368543 |         |            | 7.362662 |         |            |
| 15506,   | 195464, | 2950.8431, | 15544,   | 195348, | 2948.4898, | 15582,   | 196498, | 2946.1366, |
| 7.374269 |         |            | 7.368388 |         |            | 7.362507 |         |            |
| 15507,   | 195608, | 2950.7811, | 15545,   | 194882, | 2948.4279, | 15583,   | 196478, | 2946.0747, |
| 7.374114 |         |            | 7.368233 |         |            | 7.362352 |         |            |
| 15508,   | 195514, | 2950.7192, | 15546,   | 194256, | 2948.3660, | 15584,   | 196438, | 2946.0128, |
| 7.373959 |         |            | 7.368078 |         |            | 7.362197 |         |            |
| 15509,   | 195308, | 2950.6573, | 15547,   | 193636, | 2948.3041, | 15585,   | 196784, | 2945.9508, |
| 7.373804 |         |            | 7.367924 |         |            | 7.362043 |         |            |
| 15510,   | 195306, | 2950.5954, | 15548,   | 193354, | 2948.2421, | 15586,   | 197718, | 2945.8889, |
| 7.373650 |         |            | 7.367769 |         |            | 7.361888 |         |            |
| 15511,   | 195578, | 2950.5334, | 15549,   | 193550, | 2948.1802, | 15587,   | 198974, | 2945.8270, |
| 7.373495 |         |            | 7.367614 |         |            | 7.361733 |         |            |
| 15512,   | 195832, | 2950.4715, | 15550,   | 194006, | 2948.1183, | 15588,   | 199942, | 2945.7651, |
| 7.373340 |         |            | 7.367459 |         |            | 7.361578 |         |            |

|          |         |            |          |         |            |          |         |            |
|----------|---------|------------|----------|---------|------------|----------|---------|------------|
| 15589,   | 200216, | 2945.7031, | 15627,   | 200284, | 2943.3499, | 15665,   | 199292, | 2940.9967, |
| 7.361424 |         |            | 7.355543 |         |            | 7.349662 |         |            |
| 15590,   | 199890, | 2945.6412, | 15628,   | 199870, | 2943.2880, | 15666,   | 199186, | 2940.9348, |
| 7.361269 |         |            | 7.355388 |         |            | 7.349507 |         |            |
| 15591,   | 199450, | 2945.5793, | 15629,   | 199632, | 2943.2261, | 15667,   | 199582, | 2940.8728, |
| 7.361114 |         |            | 7.355233 |         |            | 7.349353 |         |            |
| 15592,   | 199262, | 2945.5174, | 15630,   | 199648, | 2943.1641, | 15668,   | 200422, | 2940.8109, |
| 7.360959 |         |            | 7.355079 |         |            | 7.349198 |         |            |
| 15593,   | 199290, | 2945.4554, | 15631,   | 199562, | 2943.1022, | 15669,   | 201142, | 2940.7490, |
| 7.360805 |         |            | 7.354924 |         |            | 7.349043 |         |            |
| 15594,   | 199250, | 2945.3935, | 15632,   | 199024, | 2943.0403, | 15670,   | 201158, | 2940.6871, |
| 7.360650 |         |            | 7.354769 |         |            | 7.348888 |         |            |
| 15595,   | 199008, | 2945.3316, | 15633,   | 198146, | 2942.9783, | 15671,   | 200410, | 2940.6251, |
| 7.360495 |         |            | 7.354614 |         |            | 7.348734 |         |            |
| 15596,   | 198768, | 2945.2696, | 15634,   | 197444, | 2942.9164, | 15672,   | 199414, | 2940.5632, |
| 7.360340 |         |            | 7.354460 |         |            | 7.348579 |         |            |
| 15597,   | 198872, | 2945.2077, | 15635,   | 197340, | 2942.8545, | 15673,   | 198810, | 2940.5013, |
| 7.360186 |         |            | 7.354305 |         |            | 7.348424 |         |            |
| 15598,   | 199448, | 2945.1458, | 15636,   | 197704, | 2942.7926, | 15674,   | 198830, | 2940.4393, |
| 7.360031 |         |            | 7.354150 |         |            | 7.348269 |         |            |
| 15599,   | 200306, | 2945.0839, | 15637,   | 198036, | 2942.7306, | 15675,   | 199212, | 2940.3774, |
| 7.359876 |         |            | 7.353995 |         |            | 7.348115 |         |            |
| 15600,   | 201112, | 2945.0219, | 15638,   | 197958, | 2942.6687, | 15676,   | 199542, | 2940.3155, |
| 7.359721 |         |            | 7.353841 |         |            | 7.347960 |         |            |
| 15601,   | 201642, | 2944.9600, | 15639,   | 197576, | 2942.6068, | 15677,   | 199652, | 2940.2536, |
| 7.359567 |         |            | 7.353686 |         |            | 7.347805 |         |            |
| 15602,   | 201812, | 2944.8981, | 15640,   | 197246, | 2942.5449, | 15678,   | 199666, | 2940.1916, |
| 7.359412 |         |            | 7.353531 |         |            | 7.347650 |         |            |
| 15603,   | 201644, | 2944.8362, | 15641,   | 197164, | 2942.4829, | 15679,   | 199772, | 2940.1297, |
| 7.359257 |         |            | 7.353376 |         |            | 7.347495 |         |            |
| 15604,   | 201170, | 2944.7742, | 15642,   | 197190, | 2942.4210, | 15680,   | 200014, | 2940.0678, |
| 7.359102 |         |            | 7.353222 |         |            | 7.347341 |         |            |
| 15605,   | 200510, | 2944.7123, | 15643,   | 197140, | 2942.3591, | 15681,   | 200274, | 2940.0059, |
| 7.358948 |         |            | 7.353067 |         |            | 7.347186 |         |            |
| 15606,   | 199872, | 2944.6504, | 15644,   | 197070, | 2942.2972, | 15682,   | 200382, | 2939.9439, |
| 7.358793 |         |            | 7.352912 |         |            | 7.347031 |         |            |
| 15607,   | 199434, | 2944.5884, | 15645,   | 197256, | 2942.2352, | 15683,   | 200228, | 2939.8820, |
| 7.358638 |         |            | 7.352757 |         |            | 7.346876 |         |            |
| 15608,   | 199188, | 2944.5265, | 15646,   | 197790, | 2942.1733, | 15684,   | 199768, | 2939.8201, |
| 7.358483 |         |            | 7.352602 |         |            | 7.346722 |         |            |
| 15609,   | 198966, | 2944.4646, | 15647,   | 198370, | 2942.1114, | 15685,   | 199090, | 2939.7581, |
| 7.358329 |         |            | 7.352448 |         |            | 7.346567 |         |            |
| 15610,   | 198660, | 2944.4027, | 15648,   | 198534, | 2942.0494, | 15686,   | 198478, | 2939.6962, |
| 7.358174 |         |            | 7.352293 |         |            | 7.346412 |         |            |
| 15611,   | 198364, | 2944.3407, | 15649,   | 198090, | 2941.9875, | 15687,   | 198316, | 2939.6343, |
| 7.358019 |         |            | 7.352138 |         |            | 7.346257 |         |            |
| 15612,   | 198238, | 2944.2788, | 15650,   | 197342, | 2941.9256, | 15688,   | 198820, | 2939.5724, |
| 7.357864 |         |            | 7.351983 |         |            | 7.346103 |         |            |
| 15613,   | 198286, | 2944.2169, | 15651,   | 196754, | 2941.8637, | 15689,   | 199768, | 2939.5104, |
| 7.357709 |         |            | 7.351829 |         |            | 7.345948 |         |            |
| 15614,   | 198228, | 2944.1550, | 15652,   | 196520, | 2941.8017, | 15690,   | 200598, | 2939.4485, |
| 7.357555 |         |            | 7.351674 |         |            | 7.345793 |         |            |
| 15615,   | 197832, | 2944.0930, | 15653,   | 196428, | 2941.7398, | 15691,   | 200850, | 2939.3866, |
| 7.357400 |         |            | 7.351519 |         |            | 7.345638 |         |            |
| 15616,   | 197214, | 2944.0311, | 15654,   | 196172, | 2941.6779, | 15692,   | 200570, | 2939.3247, |
| 7.357245 |         |            | 7.351364 |         |            | 7.345484 |         |            |
| 15617,   | 196856, | 2943.9692, | 15655,   | 195734, | 2941.6160, | 15693,   | 200262, | 2939.2627, |
| 7.357090 |         |            | 7.351210 |         |            | 7.345329 |         |            |
| 15618,   | 197162, | 2943.9073, | 15656,   | 195366, | 2941.5540, | 15694,   | 200338, | 2939.2008, |
| 7.356936 |         |            | 7.351055 |         |            | 7.345174 |         |            |
| 15619,   | 198026, | 2943.8453, | 15657,   | 195334, | 2941.4921, | 15695,   | 200700, | 2939.1389, |
| 7.356781 |         |            | 7.350900 |         |            | 7.345019 |         |            |
| 15620,   | 198892, | 2943.7834, | 15658,   | 195668, | 2941.4302, | 15696,   | 200832, | 2939.0770, |
| 7.356626 |         |            | 7.350745 |         |            | 7.344865 |         |            |
| 15621,   | 199284, | 2943.7215, | 15659,   | 196234, | 2941.3682, | 15697,   | 200380, | 2939.0150, |
| 7.356471 |         |            | 7.350591 |         |            | 7.344710 |         |            |
| 15622,   | 199242, | 2943.6595, | 15660,   | 196938, | 2941.3063, | 15698,   | 199564, | 2938.9531, |
| 7.356317 |         |            | 7.350436 |         |            | 7.344555 |         |            |
| 15623,   | 199236, | 2943.5976, | 15661,   | 197766, | 2941.2444, | 15699,   | 198944, | 2938.8912, |
| 7.356162 |         |            | 7.350281 |         |            | 7.344400 |         |            |
| 15624,   | 199596, | 2943.5357, | 15662,   | 198636, | 2941.1825, | 15700,   | 198856, | 2938.8292, |
| 7.356007 |         |            | 7.350126 |         |            | 7.344246 |         |            |
| 15625,   | 200160, | 2943.4738, | 15663,   | 199284, | 2941.1205, | 15701,   | 199040, | 2938.7673, |
| 7.355852 |         |            | 7.349972 |         |            | 7.344091 |         |            |
| 15626,   | 200464, | 2943.4118, | 15664,   | 199474, | 2941.0586, | 15702,   | 198992, | 2938.7054, |
| 7.355698 |         |            | 7.349817 |         |            | 7.343936 |         |            |

|          |         |            |          |         |            |          |         |            |
|----------|---------|------------|----------|---------|------------|----------|---------|------------|
| 15703,   | 198532, | 2938.6435, | 15741,   | 198738, | 2936.2902, | 15779,   | 198146, | 2933.9370, |
| 7.343781 |         |            | 7.337901 |         |            | 7.332020 |         |            |
| 15704,   | 198056, | 2938.5815, | 15742,   | 199074, | 2936.2283, | 15780,   | 198332, | 2933.8751, |
| 7.343627 |         |            | 7.337746 |         |            | 7.331865 |         |            |
| 15705,   | 198098, | 2938.5196, | 15743,   | 199294, | 2936.1664, | 15781,   | 198690, | 2933.8132, |
| 7.343472 |         |            | 7.337591 |         |            | 7.331710 |         |            |
| 15706,   | 198710, | 2938.4577, | 15744,   | 199338, | 2936.1045, | 15782,   | 199266, | 2933.7512, |
| 7.343317 |         |            | 7.337436 |         |            | 7.331555 |         |            |
| 15707,   | 199390, | 2938.3958, | 15745,   | 199188, | 2936.0425, | 15783,   | 199858, | 2933.6893, |
| 7.343162 |         |            | 7.337281 |         |            | 7.331401 |         |            |
| 15708,   | 199592, | 2938.3338, | 15746,   | 198964, | 2935.9806, | 15784,   | 200194, | 2933.6274, |
| 7.343008 |         |            | 7.337127 |         |            | 7.331246 |         |            |
| 15709,   | 199314, | 2938.2719, | 15747,   | 198918, | 2935.9187, | 15785,   | 200192, | 2933.5655, |
| 7.342853 |         |            | 7.336972 |         |            | 7.331091 |         |            |
| 15710,   | 199096, | 2938.2100, | 15748,   | 199224, | 2935.8568, | 15786,   | 199940, | 2933.5035, |
| 7.342698 |         |            | 7.336817 |         |            | 7.330936 |         |            |
| 15711,   | 199434, | 2938.1480, | 15749,   | 199744, | 2935.7948, | 15787,   | 199568, | 2933.4416, |
| 7.342543 |         |            | 7.336662 |         |            | 7.330782 |         |            |
| 15712,   | 200242, | 2938.0861, | 15750,   | 200110, | 2935.7329, | 15788,   | 199120, | 2933.3797, |
| 7.342388 |         |            | 7.336508 |         |            | 7.330627 |         |            |
| 15713,   | 200932, | 2938.0242, | 15751,   | 200070, | 2935.6710, | 15789,   | 198618, | 2933.3178, |
| 7.342234 |         |            | 7.336353 |         |            | 7.330472 |         |            |
| 15714,   | 200992, | 2937.9623, | 15752,   | 199756, | 2935.6090, | 15790,   | 198178, | 2933.2558, |
| 7.342079 |         |            | 7.336198 |         |            | 7.330317 |         |            |
| 15715,   | 200476, | 2937.9003, | 15753,   | 199564, | 2935.5471, | 15791,   | 198000, | 2933.1939, |
| 7.341924 |         |            | 7.336043 |         |            | 7.330163 |         |            |
| 15716,   | 199886, | 2937.8384, | 15754,   | 199802, | 2935.4852, | 15792,   | 198204, | 2933.1320, |
| 7.341769 |         |            | 7.335889 |         |            | 7.330008 |         |            |
| 15717,   | 199692, | 2937.7765, | 15755,   | 200408, | 2935.4233, | 15793,   | 198738, | 2933.0700, |
| 7.341615 |         |            | 7.335734 |         |            | 7.329853 |         |            |
| 15718,   | 199924, | 2937.7146, | 15756,   | 201082, | 2935.3613, | 15794,   | 199452, | 2933.0081, |
| 7.341460 |         |            | 7.335579 |         |            | 7.329698 |         |            |
| 15719,   | 200270, | 2937.6526, | 15757,   | 201582, | 2935.2994, | 15795,   | 200258, | 2932.9462, |
| 7.341305 |         |            | 7.335424 |         |            | 7.329544 |         |            |
| 15720,   | 200436, | 2937.5907, | 15758,   | 201910, | 2935.2375, | 15796,   | 201148, | 2932.8843, |
| 7.341150 |         |            | 7.335270 |         |            | 7.329389 |         |            |
| 15721,   | 200404, | 2937.5288, | 15759,   | 202096, | 2935.1756, | 15797,   | 202088, | 2932.8223, |
| 7.340996 |         |            | 7.335115 |         |            | 7.329234 |         |            |
| 15722,   | 200340, | 2937.4669, | 15760,   | 202016, | 2935.1136, | 15798,   | 202900, | 2932.7604, |
| 7.340841 |         |            | 7.334960 |         |            | 7.329079 |         |            |
| 15723,   | 200394, | 2937.4049, | 15761,   | 201468, | 2935.0517, | 15799,   | 203386, | 2932.6985, |
| 7.340686 |         |            | 7.334805 |         |            | 7.328925 |         |            |
| 15724,   | 200606, | 2937.3430, | 15762,   | 200450, | 2934.9898, | 15800,   | 203514, | 2932.6366, |
| 7.340531 |         |            | 7.334651 |         |            | 7.328770 |         |            |
| 15725,   | 200940, | 2937.2811, | 15763,   | 199364, | 2934.9279, | 15801,   | 203466, | 2932.5746, |
| 7.340377 |         |            | 7.334496 |         |            | 7.328615 |         |            |
| 15726,   | 201338, | 2937.2191, | 15764,   | 198748, | 2934.8659, | 15802,   | 203458, | 2932.5127, |
| 7.340222 |         |            | 7.334341 |         |            | 7.328460 |         |            |
| 15727,   | 201668, | 2937.1572, | 15765,   | 198814, | 2934.8040, | 15803,   | 203504, | 2932.4508, |
| 7.340067 |         |            | 7.334186 |         |            | 7.328306 |         |            |
| 15728,   | 201732, | 2937.0953, | 15766,   | 199266, | 2934.7421, | 15804,   | 203448, | 2932.3888, |
| 7.339912 |         |            | 7.334032 |         |            | 7.328151 |         |            |
| 15729,   | 201392, | 2937.0334, | 15767,   | 199600, | 2934.6801, | 15805,   | 203176, | 2932.3269, |
| 7.339758 |         |            | 7.333877 |         |            | 7.327996 |         |            |
| 15730,   | 200746, | 2936.9714, | 15768,   | 199602, | 2934.6182, | 15806,   | 202814, | 2932.2650, |
| 7.339603 |         |            | 7.333722 |         |            | 7.327841 |         |            |
| 15731,   | 200102, | 2936.9095, | 15769,   | 199506, | 2934.5563, | 15807,   | 202604, | 2932.2031, |
| 7.339448 |         |            | 7.333567 |         |            | 7.327687 |         |            |
| 15732,   | 199728, | 2936.8476, | 15770,   | 199626, | 2934.4944, | 15808,   | 202582, | 2932.1411, |
| 7.339293 |         |            | 7.333413 |         |            | 7.327532 |         |            |
| 15733,   | 199606, | 2936.7857, | 15771,   | 199954, | 2934.4324, | 15809,   | 202498, | 2932.0792, |
| 7.339139 |         |            | 7.333258 |         |            | 7.327377 |         |            |
| 15734,   | 199450, | 2936.7237, | 15772,   | 200090, | 2934.3705, | 15810,   | 202070, | 2932.0173, |
| 7.338984 |         |            | 7.333103 |         |            | 7.327222 |         |            |
| 15735,   | 199014, | 2936.6618, | 15773,   | 199688, | 2934.3086, | 15811,   | 201312, | 2931.9554, |
| 7.338829 |         |            | 7.332948 |         |            | 7.327067 |         |            |
| 15736,   | 198348, | 2936.5999, | 15774,   | 198826, | 2934.2467, | 15812,   | 200590, | 2931.8934, |
| 7.338674 |         |            | 7.332794 |         |            | 7.326913 |         |            |
| 15737,   | 197782, | 2936.5380, | 15775,   | 197986, | 2934.1847, | 15813,   | 200266, | 2931.8315, |
| 7.338520 |         |            | 7.332639 |         |            | 7.326758 |         |            |
| 15738,   | 197608, | 2936.4760, | 15776,   | 197598, | 2934.1228, | 15814,   | 200344, | 2931.7696, |
| 7.338365 |         |            | 7.332484 |         |            | 7.326603 |         |            |
| 15739,   | 197854, | 2936.4141, | 15777,   | 197680, | 2934.0609, | 15815,   | 200496, | 2931.7077, |
| 7.338210 |         |            | 7.332329 |         |            | 7.326448 |         |            |
| 15740,   | 198300, | 2936.3522, | 15778,   | 197940, | 2933.9989, | 15816,   | 200436, | 2931.6457, |
| 7.338055 |         |            | 7.332174 |         |            | 7.326294 |         |            |

|          |         |            |          |         |            |          |         |            |
|----------|---------|------------|----------|---------|------------|----------|---------|------------|
| 15817,   | 200236, | 2931.5838, | 15855,   | 202786, | 2929.2306, | 15893,   | 199100, | 2926.8774, |
| 7.326139 |         |            | 7.320258 |         |            | 7.314377 |         |            |
| 15818,   | 200154, | 2931.5219, | 15856,   | 202258, | 2929.1686, | 15894,   | 198914, | 2926.8154, |
| 7.325984 |         |            | 7.320103 |         |            | 7.314223 |         |            |
| 15819,   | 200300, | 2931.4599, | 15857,   | 201852, | 2929.1067, | 15895,   | 199344, | 2926.7535, |
| 7.325829 |         |            | 7.319949 |         |            | 7.314068 |         |            |
| 15820,   | 200440, | 2931.3980, | 15858,   | 201618, | 2929.0448, | 15896,   | 200104, | 2926.6916, |
| 7.325675 |         |            | 7.319794 |         |            | 7.313913 |         |            |
| 15821,   | 200298, | 2931.3361, | 15859,   | 201402, | 2928.9829, | 15897,   | 200666, | 2926.6296, |
| 7.325520 |         |            | 7.319639 |         |            | 7.313758 |         |            |
| 15822,   | 199908, | 2931.2742, | 15860,   | 201116, | 2928.9209, | 15898,   | 200812, | 2926.5677, |
| 7.325365 |         |            | 7.319484 |         |            | 7.313604 |         |            |
| 15823,   | 199616, | 2931.2122, | 15861,   | 200882, | 2928.8590, | 15899,   | 200798, | 2926.5058, |
| 7.325210 |         |            | 7.319330 |         |            | 7.313449 |         |            |
| 15824,   | 199688, | 2931.1503, | 15862,   | 200882, | 2928.7971, | 15900,   | 200978, | 2926.4439, |
| 7.325056 |         |            | 7.319175 |         |            | 7.313294 |         |            |
| 15825,   | 199950, | 2931.0884, | 15863,   | 201108, | 2928.7352, | 15901,   | 201324, | 2926.3819, |
| 7.324901 |         |            | 7.319020 |         |            | 7.313139 |         |            |
| 15826,   | 199942, | 2931.0265, | 15864,   | 201360, | 2928.6732, | 15902,   | 201492, | 2926.3200, |
| 7.324746 |         |            | 7.318865 |         |            | 7.312985 |         |            |
| 15827,   | 199428, | 2930.9645, | 15865,   | 201456, | 2928.6113, | 15903,   | 201234, | 2926.2581, |
| 7.324591 |         |            | 7.318711 |         |            | 7.312830 |         |            |
| 15828,   | 198724, | 2930.9026, | 15866,   | 201362, | 2928.5494, | 15904,   | 200748, | 2926.1962, |
| 7.324437 |         |            | 7.318556 |         |            | 7.312675 |         |            |
| 15829,   | 198458, | 2930.8407, | 15867,   | 201154, | 2928.4875, | 15905,   | 200480, | 2926.1342, |
| 7.324282 |         |            | 7.318401 |         |            | 7.312520 |         |            |
| 15830,   | 198928, | 2930.7787, | 15868,   | 200832, | 2928.4255, | 15906,   | 200604, | 2926.0723, |
| 7.324127 |         |            | 7.318246 |         |            | 7.312365 |         |            |
| 15831,   | 199820, | 2930.7168, | 15869,   | 200338, | 2928.3636, | 15907,   | 200836, | 2926.0104, |
| 7.323972 |         |            | 7.318092 |         |            | 7.312211 |         |            |
| 15832,   | 200496, | 2930.6549, | 15870,   | 199694, | 2928.3017, | 15908,   | 200776, | 2925.9484, |
| 7.323818 |         |            | 7.317937 |         |            | 7.312056 |         |            |
| 15833,   | 200602, | 2930.5930, | 15871,   | 199162, | 2928.2397, | 15909,   | 200382, | 2925.8865, |
| 7.323663 |         |            | 7.317782 |         |            | 7.311901 |         |            |
| 15834,   | 200332, | 2930.5310, | 15872,   | 199014, | 2928.1778, | 15910,   | 200022, | 2925.8246, |
| 7.323508 |         |            | 7.317627 |         |            | 7.311746 |         |            |
| 15835,   | 200144, | 2930.4691, | 15873,   | 199198, | 2928.1159, | 15911,   | 200030, | 2925.7627, |
| 7.323353 |         |            | 7.317473 |         |            | 7.311592 |         |            |
| 15836,   | 200270, | 2930.4072, | 15874,   | 199314, | 2928.0540, | 15912,   | 200314, | 2925.7007, |
| 7.323199 |         |            | 7.317318 |         |            | 7.311437 |         |            |
| 15837,   | 200584, | 2930.3453, | 15875,   | 198964, | 2927.9920, | 15913,   | 200460, | 2925.6388, |
| 7.323044 |         |            | 7.317163 |         |            | 7.311282 |         |            |
| 15838,   | 200862, | 2930.2833, | 15876,   | 198224, | 2927.9301, | 15914,   | 200244, | 2925.5769, |
| 7.322889 |         |            | 7.317008 |         |            | 7.311127 |         |            |
| 15839,   | 201070, | 2930.2214, | 15877,   | 197658, | 2927.8682, | 15915,   | 199950, | 2925.5150, |
| 7.322734 |         |            | 7.316853 |         |            | 7.310973 |         |            |
| 15840,   | 201336, | 2930.1595, | 15878,   | 197850, | 2927.8063, | 15916,   | 200042, | 2925.4530, |
| 7.322580 |         |            | 7.316699 |         |            | 7.310818 |         |            |
| 15841,   | 201686, | 2930.0976, | 15879,   | 198838, | 2927.7443, | 15917,   | 200610, | 2925.3911, |
| 7.322425 |         |            | 7.316544 |         |            | 7.310663 |         |            |
| 15842,   | 201940, | 2930.0356, | 15880,   | 200090, | 2927.6824, | 15918,   | 201194, | 2925.3292, |
| 7.322270 |         |            | 7.316389 |         |            | 7.310508 |         |            |
| 15843,   | 201894, | 2929.9737, | 15881,   | 200958, | 2927.6205, | 15919,   | 201226, | 2925.2673, |
| 7.322115 |         |            | 7.316234 |         |            | 7.310354 |         |            |
| 15844,   | 201624, | 2929.9118, | 15882,   | 201210, | 2927.5585, | 15920,   | 200660, | 2925.2053, |
| 7.321960 |         |            | 7.316080 |         |            | 7.310199 |         |            |
| 15845,   | 201420, | 2929.8498, | 15883,   | 201012, | 2927.4966, | 15921,   | 200056, | 2925.1434, |
| 7.321806 |         |            | 7.315925 |         |            | 7.310044 |         |            |
| 15846,   | 201506, | 2929.7879, | 15884,   | 200604, | 2927.4347, | 15922,   | 200048, | 2925.0815, |
| 7.321651 |         |            | 7.315770 |         |            | 7.309889 |         |            |
| 15847,   | 201770, | 2929.7260, | 15885,   | 200028, | 2927.3728, | 15923,   | 200738, | 2925.0195, |
| 7.321496 |         |            | 7.315615 |         |            | 7.309735 |         |            |
| 15848,   | 201918, | 2929.6641, | 15886,   | 199278, | 2927.3108, | 15924,   | 201634, | 2924.9576, |
| 7.321341 |         |            | 7.315461 |         |            | 7.309580 |         |            |
| 15849,   | 201822, | 2929.6021, | 15887,   | 198558, | 2927.2489, | 15925,   | 202150, | 2924.8957, |
| 7.321187 |         |            | 7.315306 |         |            | 7.309425 |         |            |
| 15850,   | 201708, | 2929.5402, | 15888,   | 198278, | 2927.1870, | 15926,   | 202124, | 2924.8338, |
| 7.321032 |         |            | 7.315151 |         |            | 7.309270 |         |            |
| 15851,   | 201908, | 2929.4783, | 15889,   | 198634, | 2927.1251, | 15927,   | 201846, | 2924.7718, |
| 7.320877 |         |            | 7.314996 |         |            | 7.309116 |         |            |
| 15852,   | 202442, | 2929.4164, | 15890,   | 199328, | 2927.0631, | 15928,   | 201662, | 2924.7099, |
| 7.320722 |         |            | 7.314842 |         |            | 7.308961 |         |            |
| 15853,   | 202980, | 2929.3544, | 15891,   | 199754, | 2927.0012, | 15929,   | 201622, | 2924.6480, |
| 7.320568 |         |            | 7.314687 |         |            | 7.308806 |         |            |
| 15854,   | 203120, | 2929.2925, | 15892,   | 199584, | 2926.9393, | 15930,   | 201556, | 2924.5861, |
| 7.320413 |         |            | 7.314532 |         |            | 7.308651 |         |            |

|          |         |            |          |         |            |          |         |            |
|----------|---------|------------|----------|---------|------------|----------|---------|------------|
| 15931,   | 201352, | 2924.5241, | 15969,   | 198858, | 2922.1709, | 16007,   | 201638, | 2919.8177, |
| 7.308497 |         |            | 7.302616 |         |            | 7.296735 |         |            |
| 15932,   | 201102, | 2924.4622, | 15970,   | 198424, | 2922.1090, | 16008,   | 201656, | 2919.7558, |
| 7.308342 |         |            | 7.302461 |         |            | 7.296580 |         |            |
| 15933,   | 200970, | 2924.4003, | 15971,   | 198314, | 2922.0471, | 16009,   | 201992, | 2919.6938, |
| 7.308187 |         |            | 7.302306 |         |            | 7.296425 |         |            |
| 15934,   | 200986, | 2924.3384, | 15972,   | 198380, | 2921.9851, | 16010,   | 202476, | 2919.6319, |
| 7.308032 |         |            | 7.302151 |         |            | 7.296271 |         |            |
| 15935,   | 201058, | 2924.2764, | 15973,   | 198342, | 2921.9232, | 16011,   | 202860, | 2919.5700, |
| 7.307878 |         |            | 7.301997 |         |            | 7.296116 |         |            |
| 15936,   | 201134, | 2924.2145, | 15974,   | 198142, | 2921.8613, | 16012,   | 203124, | 2919.5081, |
| 7.307723 |         |            | 7.301842 |         |            | 7.295961 |         |            |
| 15937,   | 201314, | 2924.1526, | 15975,   | 198062, | 2921.7993, | 16013,   | 203434, | 2919.4461, |
| 7.307568 |         |            | 7.301687 |         |            | 7.295806 |         |            |
| 15938,   | 201686, | 2924.0906, | 15976,   | 198426, | 2921.7374, | 16014,   | 203858, | 2919.3842, |
| 7.307413 |         |            | 7.301532 |         |            | 7.295652 |         |            |
| 15939,   | 202184, | 2924.0287, | 15977,   | 199250, | 2921.6755, | 16015,   | 204132, | 2919.3223, |
| 7.307258 |         |            | 7.301378 |         |            | 7.295497 |         |            |
| 15940,   | 202582, | 2923.9668, | 15978,   | 200204, | 2921.6136, | 16016,   | 203872, | 2919.2603, |
| 7.307104 |         |            | 7.301223 |         |            | 7.295342 |         |            |
| 15941,   | 202718, | 2923.9049, | 15979,   | 200906, | 2921.5516, | 16017,   | 202992, | 2919.1984, |
| 7.306949 |         |            | 7.301068 |         |            | 7.295187 |         |            |
| 15942,   | 202622, | 2923.8429, | 15980,   | 201236, | 2921.4897, | 16018,   | 201890, | 2919.1365, |
| 7.306794 |         |            | 7.300913 |         |            | 7.295033 |         |            |
| 15943,   | 202444, | 2923.7810, | 15981,   | 201324, | 2921.4278, | 16019,   | 201106, | 2919.0746, |
| 7.306639 |         |            | 7.300759 |         |            | 7.294878 |         |            |
| 15944,   | 202244, | 2923.7191, | 15982,   | 201326, | 2921.3659, | 16020,   | 200896, | 2919.0126, |
| 7.306485 |         |            | 7.300604 |         |            | 7.294723 |         |            |
| 15945,   | 201954, | 2923.6572, | 15983,   | 201268, | 2921.3039, | 16021,   | 201036, | 2918.9507, |
| 7.306330 |         |            | 7.300449 |         |            | 7.294568 |         |            |
| 15946,   | 201518, | 2923.5952, | 15984,   | 201084, | 2921.2420, | 16022,   | 201150, | 2918.8888, |
| 7.306175 |         |            | 7.300294 |         |            | 7.294414 |         |            |
| 15947,   | 201068, | 2923.5333, | 15985,   | 200814, | 2921.1801, | 16023,   | 201090, | 2918.8269, |
| 7.306020 |         |            | 7.300140 |         |            | 7.294259 |         |            |
| 15948,   | 200824, | 2923.4714, | 15986,   | 200594, | 2921.1182, | 16024,   | 201000, | 2918.7649, |
| 7.305866 |         |            | 7.299985 |         |            | 7.294104 |         |            |
| 15949,   | 200834, | 2923.4094, | 15987,   | 200540, | 2921.0562, | 16025,   | 201050, | 2918.7030, |
| 7.305711 |         |            | 7.299830 |         |            | 7.293949 |         |            |
| 15950,   | 200898, | 2923.3475, | 15988,   | 200618, | 2920.9943, | 16026,   | 201186, | 2918.6411, |
| 7.305556 |         |            | 7.299675 |         |            | 7.293795 |         |            |
| 15951,   | 200774, | 2923.2856, | 15989,   | 200742, | 2920.9324, | 16027,   | 201224, | 2918.5791, |
| 7.305401 |         |            | 7.299521 |         |            | 7.293640 |         |            |
| 15952,   | 200472, | 2923.2237, | 15990,   | 200858, | 2920.8704, | 16028,   | 201144, | 2918.5172, |
| 7.305247 |         |            | 7.299366 |         |            | 7.293485 |         |            |
| 15953,   | 200302, | 2923.1617, | 15991,   | 200996, | 2920.8085, | 16029,   | 201184, | 2918.4553, |
| 7.305092 |         |            | 7.299211 |         |            | 7.293330 |         |            |
| 15954,   | 200526, | 2923.0998, | 15992,   | 201102, | 2920.7466, | 16030,   | 201632, | 2918.3934, |
| 7.304937 |         |            | 7.299056 |         |            | 7.293176 |         |            |
| 15955,   | 201040, | 2923.0379, | 15993,   | 201038, | 2920.6847, | 16031,   | 202478, | 2918.3314, |
| 7.304782 |         |            | 7.298902 |         |            | 7.293021 |         |            |
| 15956,   | 201442, | 2922.9760, | 15994,   | 200720, | 2920.6227, | 16032,   | 203348, | 2918.2695, |
| 7.304628 |         |            | 7.298747 |         |            | 7.292866 |         |            |
| 15957,   | 201452, | 2922.9140, | 15995,   | 200374, | 2920.5608, | 16033,   | 203810, | 2918.2076, |
| 7.304473 |         |            | 7.298592 |         |            | 7.292711 |         |            |
| 15958,   | 201204, | 2922.8521, | 15996,   | 200432, | 2920.4989, | 16034,   | 203714, | 2918.1457, |
| 7.304318 |         |            | 7.298437 |         |            | 7.292557 |         |            |
| 15959,   | 201076, | 2922.7902, | 15997,   | 201174, | 2920.4370, | 16035,   | 203260, | 2918.0837, |
| 7.304163 |         |            | 7.298283 |         |            | 7.292402 |         |            |
| 15960,   | 201266, | 2922.7283, | 15998,   | 202340, | 2920.3750, | 16036,   | 202762, | 2918.0218, |
| 7.304009 |         |            | 7.298128 |         |            | 7.292247 |         |            |
| 15961,   | 201564, | 2922.6663, | 15999,   | 203264, | 2920.3131, | 16037,   | 202402, | 2917.9599, |
| 7.303854 |         |            | 7.297973 |         |            | 7.292092 |         |            |
| 15962,   | 201564, | 2922.6044, | 16000,   | 203406, | 2920.2512, | 16038,   | 202218, | 2917.8980, |
| 7.303699 |         |            | 7.297818 |         |            | 7.291937 |         |            |
| 15963,   | 201128, | 2922.5425, | 16001,   | 202804, | 2920.1892, | 16039,   | 202206, | 2917.8360, |
| 7.303544 |         |            | 7.297664 |         |            | 7.291783 |         |            |
| 15964,   | 200528, | 2922.4805, | 16002,   | 202032, | 2920.1273, | 16040,   | 202382, | 2917.7741, |
| 7.303390 |         |            | 7.297509 |         |            | 7.291628 |         |            |
| 15965,   | 200120, | 2922.4186, | 16003,   | 201632, | 2920.0654, | 16041,   | 202690, | 2917.7122, |
| 7.303235 |         |            | 7.297354 |         |            | 7.291473 |         |            |
| 15966,   | 199974, | 2922.3567, | 16004,   | 201680, | 2920.0035, | 16042,   | 202960, | 2917.6502, |
| 7.303080 |         |            | 7.297199 |         |            | 7.291318 |         |            |
| 15967,   | 199826, | 2922.2948, | 16005,   | 201834, | 2919.9415, | 16043,   | 202986, | 2917.5883, |
| 7.302925 |         |            | 7.297044 |         |            | 7.291164 |         |            |
| 15968,   | 199428, | 2922.2328, | 16006,   | 201792, | 2919.8796, | 16044,   | 202696, | 2917.5264, |
| 7.302771 |         |            | 7.296890 |         |            | 7.291009 |         |            |



|          |         |            |          |         |            |          |         |            |
|----------|---------|------------|----------|---------|------------|----------|---------|------------|
| 16045,   | 202222, | 2917.4645, | 16083,   | 203628, | 2915.1112, | 16121,   | 201970, | 2912.7580, |
| 7.290854 |         |            | 7.284973 |         |            | 7.279093 |         |            |
| 16046,   | 201776, | 2917.4025, | 16084,   | 203952, | 2915.0493, | 16122,   | 202166, | 2912.6961, |
| 7.290699 |         |            | 7.284819 |         |            | 7.278938 |         |            |
| 16047,   | 201476, | 2917.3406, | 16085,   | 204524, | 2914.9874, | 16123,   | 202508, | 2912.6342, |
| 7.290545 |         |            | 7.284664 |         |            | 7.278783 |         |            |
| 16048,   | 201334, | 2917.2787, | 16086,   | 204946, | 2914.9255, | 16124,   | 202586, | 2912.5722, |
| 7.290390 |         |            | 7.284509 |         |            | 7.278628 |         |            |
| 16049,   | 201368, | 2917.2168, | 16087,   | 204946, | 2914.8635, | 16125,   | 202262, | 2912.5103, |
| 7.290235 |         |            | 7.284354 |         |            | 7.278474 |         |            |
| 16050,   | 201644, | 2917.1548, | 16088,   | 204652, | 2914.8016, | 16126,   | 201904, | 2912.4484, |
| 7.290080 |         |            | 7.284200 |         |            | 7.278319 |         |            |
| 16051,   | 202170, | 2917.0929, | 16089,   | 204464, | 2914.7397, | 16127,   | 202068, | 2912.3865, |
| 7.289926 |         |            | 7.284045 |         |            | 7.278164 |         |            |
| 16052,   | 202778, | 2917.0310, | 16090,   | 204552, | 2914.6778, | 16128,   | 202950, | 2912.3245, |
| 7.289771 |         |            | 7.283890 |         |            | 7.278009 |         |            |
| 16053,   | 203160, | 2916.9690, | 16091,   | 204692, | 2914.6158, | 16129,   | 204156, | 2912.2626, |
| 7.289616 |         |            | 7.283735 |         |            | 7.277855 |         |            |
| 16054,   | 203118, | 2916.9071, | 16092,   | 204554, | 2914.5539, | 16130,   | 205032, | 2912.2007, |
| 7.289461 |         |            | 7.283581 |         |            | 7.277700 |         |            |
| 16055,   | 202756, | 2916.8452, | 16093,   | 204122, | 2914.4920, | 16131,   | 205206, | 2912.1387, |
| 7.289307 |         |            | 7.283426 |         |            | 7.277545 |         |            |
| 16056,   | 202392, | 2916.7833, | 16094,   | 203748, | 2914.4300, | 16132,   | 204836, | 2912.0768, |
| 7.289152 |         |            | 7.283271 |         |            | 7.277390 |         |            |
| 16057,   | 202286, | 2916.7213, | 16095,   | 203718, | 2914.3681, | 16133,   | 204334, | 2912.0149, |
| 7.288997 |         |            | 7.283116 |         |            | 7.277236 |         |            |
| 16058,   | 202456, | 2916.6594, | 16096,   | 203892, | 2914.3062, | 16134,   | 203976, | 2911.9530, |
| 7.288842 |         |            | 7.282962 |         |            | 7.277081 |         |            |
| 16059,   | 202768, | 2916.5975, | 16097,   | 203818, | 2914.2443, | 16135,   | 203766, | 2911.8910, |
| 7.288688 |         |            | 7.282807 |         |            | 7.276926 |         |            |
| 16060,   | 203148, | 2916.5356, | 16098,   | 203212, | 2914.1823, | 16136,   | 203586, | 2911.8291, |
| 7.288533 |         |            | 7.282652 |         |            | 7.276771 |         |            |
| 16061,   | 203600, | 2916.4736, | 16099,   | 202280, | 2914.1204, | 16137,   | 203400, | 2911.7672, |
| 7.288378 |         |            | 7.282497 |         |            | 7.276616 |         |            |
| 16062,   | 204050, | 2916.4117, | 16100,   | 201508, | 2914.0585, | 16138,   | 203232, | 2911.7053, |
| 7.288223 |         |            | 7.282343 |         |            | 7.276462 |         |            |
| 16063,   | 204248, | 2916.3498, | 16101,   | 201192, | 2913.9966, | 16139,   | 202998, | 2911.6433, |
| 7.288069 |         |            | 7.282188 |         |            | 7.276307 |         |            |
| 16064,   | 203924, | 2916.2879, | 16102,   | 201220, | 2913.9346, | 16140,   | 202566, | 2911.5814, |
| 7.287914 |         |            | 7.282033 |         |            | 7.276152 |         |            |
| 16065,   | 203106, | 2916.2259, | 16103,   | 201314, | 2913.8727, | 16141,   | 201900, | 2911.5195, |
| 7.287759 |         |            | 7.281878 |         |            | 7.275997 |         |            |
| 16066,   | 202180, | 2916.1640, | 16104,   | 201416, | 2913.8108, | 16142,   | 201208, | 2911.4576, |
| 7.287604 |         |            | 7.281723 |         |            | 7.275843 |         |            |
| 16067,   | 201604, | 2916.1021, | 16105,   | 201736, | 2913.7488, | 16143,   | 200788, | 2911.3956, |
| 7.287450 |         |            | 7.281569 |         |            | 7.275688 |         |            |
| 16068,   | 201480, | 2916.0401, | 16106,   | 202438, | 2913.6869, | 16144,   | 200760, | 2911.3337, |
| 7.287295 |         |            | 7.281414 |         |            | 7.275533 |         |            |
| 16069,   | 201508, | 2915.9782, | 16107,   | 203346, | 2913.6250, | 16145,   | 200960, | 2911.2718, |
| 7.287140 |         |            | 7.281259 |         |            | 7.275378 |         |            |
| 16070,   | 201406, | 2915.9163, | 16108,   | 204044, | 2913.5631, | 16146,   | 201154, | 2911.2098, |
| 7.286985 |         |            | 7.281104 |         |            | 7.275224 |         |            |
| 16071,   | 201260, | 2915.8544, | 16109,   | 204286, | 2913.5011, | 16147,   | 201304, | 2911.1479, |
| 7.286830 |         |            | 7.280950 |         |            | 7.275069 |         |            |
| 16072,   | 201482, | 2915.7924, | 16110,   | 204208, | 2913.4392, | 16148,   | 201572, | 2911.0860, |
| 7.286676 |         |            | 7.280795 |         |            | 7.274914 |         |            |
| 16073,   | 202300, | 2915.7305, | 16111,   | 204130, | 2913.3773, | 16149,   | 202034, | 2911.0241, |
| 7.286521 |         |            | 7.280640 |         |            | 7.274759 |         |            |
| 16074,   | 203388, | 2915.6686, | 16112,   | 204202, | 2913.3154, | 16150,   | 202476, | 2910.9621, |
| 7.286366 |         |            | 7.280485 |         |            | 7.274605 |         |            |
| 16075,   | 204094, | 2915.6067, | 16113,   | 204280, | 2913.2534, | 16151,   | 202552, | 2910.9002, |
| 7.286211 |         |            | 7.280331 |         |            | 7.274450 |         |            |
| 16076,   | 204032, | 2915.5447, | 16114,   | 204164, | 2913.1915, | 16152,   | 202150, | 2910.8383, |
| 7.286057 |         |            | 7.280176 |         |            | 7.274295 |         |            |
| 16077,   | 203458, | 2915.4828, | 16115,   | 203852, | 2913.1296, | 16153,   | 201528, | 2910.7764, |
| 7.285902 |         |            | 7.280021 |         |            | 7.274140 |         |            |
| 16078,   | 202996, | 2915.4209, | 16116,   | 203514, | 2913.0677, | 16154,   | 201076, | 2910.7144, |
| 7.285747 |         |            | 7.279866 |         |            | 7.273986 |         |            |
| 16079,   | 203024, | 2915.3589, | 16117,   | 203260, | 2913.0057, | 16155,   | 200896, | 2910.6525, |
| 7.285592 |         |            | 7.279712 |         |            | 7.273831 |         |            |
| 16080,   | 203368, | 2915.2970, | 16118,   | 202992, | 2912.9438, | 16156,   | 200750, | 2910.5906, |
| 7.285438 |         |            | 7.279557 |         |            | 7.273676 |         |            |
| 16081,   | 203616, | 2915.2351, | 16119,   | 202592, | 2912.8819, | 16157,   | 200406, | 2910.5287, |
| 7.285283 |         |            | 7.279402 |         |            | 7.273521 |         |            |
| 16082,   | 203618, | 2915.1732, | 16120,   | 202154, | 2912.8199, | 16158,   | 200004, | 2910.4667, |
| 7.285128 |         |            | 7.279247 |         |            | 7.273367 |         |            |

|          |         |            |          |         |            |          |         |            |
|----------|---------|------------|----------|---------|------------|----------|---------|------------|
| 16159,   | 199954, | 2910.4048, | 16197,   | 202376, | 2908.0516, | 16235,   | 208268, | 2905.6984, |
| 7.273212 |         |            | 7.267331 |         |            | 7.261450 |         |            |
| 16160,   | 200484, | 2910.3429, | 16198,   | 202624, | 2907.9896, | 16236,   | 208074, | 2905.6364, |
| 7.273057 |         |            | 7.267176 |         |            | 7.261295 |         |            |
| 16161,   | 201306, | 2910.2809, | 16199,   | 203140, | 2907.9277, | 16237,   | 207398, | 2905.5745, |
| 7.272902 |         |            | 7.267021 |         |            | 7.261141 |         |            |
| 16162,   | 201824, | 2910.2190, | 16200,   | 203572, | 2907.8658, | 16238,   | 206288, | 2905.5126, |
| 7.272748 |         |            | 7.266867 |         |            | 7.260986 |         |            |
| 16163,   | 201718, | 2910.1571, | 16201,   | 203892, | 2907.8039, | 16239,   | 205118, | 2905.4506, |
| 7.272593 |         |            | 7.266712 |         |            | 7.260831 |         |            |
| 16164,   | 201252, | 2910.0952, | 16202,   | 204486, | 2907.7419, | 16240,   | 204474, | 2905.3887, |
| 7.272438 |         |            | 7.266557 |         |            | 7.260676 |         |            |
| 16165,   | 201018, | 2910.0332, | 16203,   | 205646, | 2907.6800, | 16241,   | 204674, | 2905.3268, |
| 7.272283 |         |            | 7.266402 |         |            | 7.260522 |         |            |
| 16166,   | 201338, | 2909.9713, | 16204,   | 207088, | 2907.6181, | 16242,   | 205412, | 2905.2649, |
| 7.272129 |         |            | 7.266248 |         |            | 7.260367 |         |            |
| 16167,   | 202004, | 2909.9094, | 16205,   | 208036, | 2907.5562, | 16243,   | 205994, | 2905.2029, |
| 7.271974 |         |            | 7.266093 |         |            | 7.260212 |         |            |
| 16168,   | 202528, | 2909.8475, | 16206,   | 207840, | 2907.4942, | 16244,   | 205876, | 2905.1410, |
| 7.271819 |         |            | 7.265938 |         |            | 7.260057 |         |            |
| 16169,   | 202622, | 2909.7855, | 16207,   | 206562, | 2907.4323, | 16245,   | 205088, | 2905.0791, |
| 7.271664 |         |            | 7.265783 |         |            | 7.259903 |         |            |
| 16170,   | 202404, | 2909.7236, | 16208,   | 204910, | 2907.3704, | 16246,   | 204070, | 2905.0172, |
| 7.271509 |         |            | 7.265629 |         |            | 7.259748 |         |            |
| 16171,   | 202196, | 2909.6617, | 16209,   | 203630, | 2907.3085, | 16247,   | 203176, | 2904.9552, |
| 7.271355 |         |            | 7.265474 |         |            | 7.259593 |         |            |
| 16172,   | 202162, | 2909.5997, | 16210,   | 203010, | 2907.2465, | 16248,   | 202438, | 2904.8933, |
| 7.271200 |         |            | 7.265319 |         |            | 7.259438 |         |            |
| 16173,   | 202264, | 2909.5378, | 16211,   | 202874, | 2907.1846, | 16249,   | 201754, | 2904.8314, |
| 7.271045 |         |            | 7.265164 |         |            | 7.259284 |         |            |
| 16174,   | 202430, | 2909.4759, | 16212,   | 202988, | 2907.1227, | 16250,   | 201238, | 2904.7694, |
| 7.270890 |         |            | 7.265010 |         |            | 7.259129 |         |            |
| 16175,   | 202696, | 2909.4140, | 16213,   | 203298, | 2907.0607, | 16251,   | 201222, | 2904.7075, |
| 7.270736 |         |            | 7.264855 |         |            | 7.258974 |         |            |
| 16176,   | 203142, | 2909.3520, | 16214,   | 203816, | 2906.9988, | 16252,   | 201862, | 2904.6456, |
| 7.270581 |         |            | 7.264700 |         |            | 7.258819 |         |            |
| 16177,   | 203682, | 2909.2901, | 16215,   | 204360, | 2906.9369, | 16253,   | 202840, | 2904.5837, |
| 7.270426 |         |            | 7.264545 |         |            | 7.258665 |         |            |
| 16178,   | 204084, | 2909.2282, | 16216,   | 204600, | 2906.8750, | 16254,   | 203586, | 2904.5217, |
| 7.270271 |         |            | 7.264391 |         |            | 7.258510 |         |            |
| 16179,   | 204158, | 2909.1663, | 16217,   | 204378, | 2906.8130, | 16255,   | 203802, | 2904.4598, |
| 7.270117 |         |            | 7.264236 |         |            | 7.258355 |         |            |
| 16180,   | 203930, | 2909.1043, | 16218,   | 203932, | 2906.7511, | 16256,   | 203764, | 2904.3979, |
| 7.269962 |         |            | 7.264081 |         |            | 7.258200 |         |            |
| 16181,   | 203562, | 2909.0424, | 16219,   | 203726, | 2906.6892, | 16257,   | 204002, | 2904.3360, |
| 7.269807 |         |            | 7.263926 |         |            | 7.258046 |         |            |
| 16182,   | 203168, | 2908.9805, | 16220,   | 204018, | 2906.6273, | 16258,   | 204708, | 2904.2740, |
| 7.269652 |         |            | 7.263772 |         |            | 7.257891 |         |            |
| 16183,   | 202712, | 2908.9186, | 16221,   | 204648, | 2906.5653, | 16259,   | 205516, | 2904.2121, |
| 7.269498 |         |            | 7.263617 |         |            | 7.257736 |         |            |
| 16184,   | 202178, | 2908.8566, | 16222,   | 205264, | 2906.5034, | 16260,   | 205848, | 2904.1502, |
| 7.269343 |         |            | 7.263462 |         |            | 7.257581 |         |            |
| 16185,   | 201698, | 2908.7947, | 16223,   | 205686, | 2906.4415, | 16261,   | 205528, | 2904.0883, |
| 7.269188 |         |            | 7.263307 |         |            | 7.257427 |         |            |
| 16186,   | 201492, | 2908.7328, | 16224,   | 205986, | 2906.3795, | 16262,   | 204904, | 2904.0263, |
| 7.269033 |         |            | 7.263153 |         |            | 7.257272 |         |            |
| 16187,   | 201610, | 2908.6708, | 16225,   | 206270, | 2906.3176, | 16263,   | 204488, | 2903.9644, |
| 7.268879 |         |            | 7.262998 |         |            | 7.257117 |         |            |
| 16188,   | 201848, | 2908.6089, | 16226,   | 206432, | 2906.2557, | 16264,   | 204452, | 2903.9025, |
| 7.268724 |         |            | 7.262843 |         |            | 7.256962 |         |            |
| 16189,   | 201966, | 2908.5470, | 16227,   | 206258, | 2906.1938, | 16265,   | 204560, | 2903.8405, |
| 7.268569 |         |            | 7.262688 |         |            | 7.256807 |         |            |
| 16190,   | 201954, | 2908.4851, | 16228,   | 205752, | 2906.1318, | 16266,   | 204518, | 2903.7786, |
| 7.268414 |         |            | 7.262534 |         |            | 7.256653 |         |            |
| 16191,   | 202072, | 2908.4231, | 16229,   | 205250, | 2906.0699, | 16267,   | 204302, | 2903.7167, |
| 7.268260 |         |            | 7.262379 |         |            | 7.256498 |         |            |
| 16192,   | 202502, | 2908.3612, | 16230,   | 205204, | 2906.0080, | 16268,   | 204124, | 2903.6548, |
| 7.268105 |         |            | 7.262224 |         |            | 7.256343 |         |            |
| 16193,   | 203062, | 2908.2993, | 16231,   | 205766, | 2905.9461, | 16269,   | 204130, | 2903.5928, |
| 7.267950 |         |            | 7.262069 |         |            | 7.256188 |         |            |
| 16194,   | 203334, | 2908.2374, | 16232,   | 206676, | 2905.8841, | 16270,   | 204244, | 2903.5309, |
| 7.267795 |         |            | 7.261914 |         |            | 7.256034 |         |            |
| 16195,   | 203098, | 2908.1754, | 16233,   | 207530, | 2905.8222, | 16271,   | 204332, | 2903.4690, |
| 7.267641 |         |            | 7.261760 |         |            | 7.255879 |         |            |
| 16196,   | 202614, | 2908.1135, | 16234,   | 208074, | 2905.7603, | 16272,   | 204412, | 2903.4071, |
| 7.267486 |         |            | 7.261605 |         |            | 7.255724 |         |            |

|          |         |            |          |         |            |          |         |            |
|----------|---------|------------|----------|---------|------------|----------|---------|------------|
| 16273,   | 204668, | 2903.3451, | 16311,   | 205512, | 2900.9919, | 16349,   | 208364, | 2898.6387, |
| 7.255569 |         |            | 7.249689 |         |            | 7.243808 |         |            |
| 16274,   | 205172, | 2903.2832, | 16312,   | 205824, | 2900.9300, | 16350,   | 208580, | 2898.5768, |
| 7.255415 |         |            | 7.249534 |         |            | 7.243653 |         |            |
| 16275,   | 205806, | 2903.2213, | 16313,   | 205718, | 2900.8681, | 16351,   | 209044, | 2898.5148, |
| 7.255260 |         |            | 7.249379 |         |            | 7.243498 |         |            |
| 16276,   | 206368, | 2903.1593, | 16314,   | 205362, | 2900.8061, | 16352,   | 209422, | 2898.4529, |
| 7.255105 |         |            | 7.249224 |         |            | 7.243344 |         |            |
| 16277,   | 206824, | 2903.0974, | 16315,   | 204990, | 2900.7442, | 16353,   | 209446, | 2898.3910, |
| 7.254950 |         |            | 7.249070 |         |            | 7.243189 |         |            |
| 16278,   | 207318, | 2903.0355, | 16316,   | 204826, | 2900.6823, | 16354,   | 209128, | 2898.3290, |
| 7.254796 |         |            | 7.248915 |         |            | 7.243034 |         |            |
| 16279,   | 207896, | 2902.9736, | 16317,   | 204936, | 2900.6203, | 16355,   | 208648, | 2898.2671, |
| 7.254641 |         |            | 7.248760 |         |            | 7.242879 |         |            |
| 16280,   | 208314, | 2902.9116, | 16318,   | 205172, | 2900.5584, | 16356,   | 208096, | 2898.2052, |
| 7.254486 |         |            | 7.248605 |         |            | 7.242725 |         |            |
| 16281,   | 208222, | 2902.8497, | 16319,   | 205320, | 2900.4965, | 16357,   | 207380, | 2898.1433, |
| 7.254331 |         |            | 7.248451 |         |            | 7.242570 |         |            |
| 16282,   | 207550, | 2902.7878, | 16320,   | 205334, | 2900.4346, | 16358,   | 206428, | 2898.0813, |
| 7.254177 |         |            | 7.248296 |         |            | 7.242415 |         |            |
| 16283,   | 206684, | 2902.7259, | 16321,   | 205374, | 2900.3726, | 16359,   | 205360, | 2898.0194, |
| 7.254022 |         |            | 7.248141 |         |            | 7.242260 |         |            |
| 16284,   | 206146, | 2902.6639, | 16322,   | 205580, | 2900.3107, | 16360,   | 204452, | 2897.9575, |
| 7.253867 |         |            | 7.247986 |         |            | 7.242106 |         |            |
| 16285,   | 206102, | 2902.6020, | 16323,   | 205808, | 2900.2488, | 16361,   | 203932, | 2897.8956, |
| 7.253712 |         |            | 7.247832 |         |            | 7.241951 |         |            |
| 16286,   | 206208, | 2902.5401, | 16324,   | 205740, | 2900.1869, | 16362,   | 203848, | 2897.8336, |
| 7.253558 |         |            | 7.247677 |         |            | 7.241796 |         |            |
| 16287,   | 206008, | 2902.4782, | 16325,   | 205222, | 2900.1249, | 16363,   | 204070, | 2897.7717, |
| 7.253403 |         |            | 7.247522 |         |            | 7.241641 |         |            |
| 16288,   | 205408, | 2902.4162, | 16326,   | 204532, | 2900.0630, | 16364,   | 204482, | 2897.7098, |
| 7.253248 |         |            | 7.247367 |         |            | 7.241486 |         |            |
| 16289,   | 204726, | 2902.3543, | 16327,   | 204192, | 2900.0011, | 16365,   | 204964, | 2897.6479, |
| 7.253093 |         |            | 7.247213 |         |            | 7.241332 |         |            |
| 16290,   | 204310, | 2902.2924, | 16328,   | 204506, | 2899.9391, | 16366,   | 205378, | 2897.5859, |
| 7.252939 |         |            | 7.247058 |         |            | 7.241177 |         |            |
| 16291,   | 204138, | 2902.2304, | 16329,   | 205280, | 2899.8772, | 16367,   | 205546, | 2897.5240, |
| 7.252784 |         |            | 7.246903 |         |            | 7.241022 |         |            |
| 16292,   | 203888, | 2902.1685, | 16330,   | 206038, | 2899.8153, | 16368,   | 205400, | 2897.4621, |
| 7.252629 |         |            | 7.246748 |         |            | 7.240867 |         |            |
| 16293,   | 203402, | 2902.1066, | 16331,   | 206476, | 2899.7534, | 16369,   | 205134, | 2897.4001, |
| 7.252474 |         |            | 7.246593 |         |            | 7.240713 |         |            |
| 16294,   | 202944, | 2902.0447, | 16332,   | 206700, | 2899.6914, | 16370,   | 205076, | 2897.3382, |
| 7.252320 |         |            | 7.246439 |         |            | 7.240558 |         |            |
| 16295,   | 202966, | 2901.9827, | 16333,   | 206988, | 2899.6295, | 16371,   | 205438, | 2897.2763, |
| 7.252165 |         |            | 7.246284 |         |            | 7.240403 |         |            |
| 16296,   | 203616, | 2901.9208, | 16334,   | 207376, | 2899.5676, | 16372,   | 206064, | 2897.2144, |
| 7.252010 |         |            | 7.246129 |         |            | 7.240248 |         |            |
| 16297,   | 204516, | 2901.8589, | 16335,   | 207586, | 2899.5057, | 16373,   | 206544, | 2897.1524, |
| 7.251855 |         |            | 7.245974 |         |            | 7.240094 |         |            |
| 16298,   | 205122, | 2901.7970, | 16336,   | 207344, | 2899.4437, | 16374,   | 206574, | 2897.0905, |
| 7.251700 |         |            | 7.245820 |         |            | 7.239939 |         |            |
| 16299,   | 205204, | 2901.7350, | 16337,   | 206718, | 2899.3818, | 16375,   | 206208, | 2897.0286, |
| 7.251546 |         |            | 7.245665 |         |            | 7.239784 |         |            |
| 16300,   | 204958, | 2901.6731, | 16338,   | 206100, | 2899.3199, | 16376,   | 205786, | 2896.9667, |
| 7.251391 |         |            | 7.245510 |         |            | 7.239629 |         |            |
| 16301,   | 204666, | 2901.6112, | 16339,   | 205818, | 2899.2580, | 16377,   | 205614, | 2896.9047, |
| 7.251236 |         |            | 7.245355 |         |            | 7.239475 |         |            |
| 16302,   | 204298, | 2901.5492, | 16340,   | 205854, | 2899.1960, | 16378,   | 205748, | 2896.8428, |
| 7.251081 |         |            | 7.245201 |         |            | 7.239320 |         |            |
| 16303,   | 203576, | 2901.4873, | 16341,   | 205974, | 2899.1341, | 16379,   | 206038, | 2896.7809, |
| 7.250927 |         |            | 7.245046 |         |            | 7.239165 |         |            |
| 16304,   | 202390, | 2901.4254, | 16342,   | 206050, | 2899.0722, | 16380,   | 206350, | 2896.7190, |
| 7.250772 |         |            | 7.244891 |         |            | 7.239010 |         |            |
| 16305,   | 201094, | 2901.3635, | 16343,   | 206260, | 2899.0102, | 16381,   | 206628, | 2896.6570, |
| 7.250617 |         |            | 7.244736 |         |            | 7.238856 |         |            |
| 16306,   | 200358, | 2901.3015, | 16344,   | 206802, | 2898.9483, | 16382,   | 206832, | 2896.5951, |
| 7.250462 |         |            | 7.244582 |         |            | 7.238701 |         |            |
| 16307,   | 200626, | 2901.2396, | 16345,   | 207606, | 2898.8864, | 16383,   | 206864, | 2896.5332, |
| 7.250308 |         |            | 7.244427 |         |            | 7.238546 |         |            |
| 16308,   | 201798, | 2901.1777, | 16346,   | 208300, | 2898.8245, | 16384,   | 206652, | 2896.4712, |
| 7.250153 |         |            | 7.244272 |         |            | 7.238391 |         |            |
| 16309,   | 203332, | 2901.1158, | 16347,   | 208564, | 2898.7625, | 16385,   | 206298, | 2896.4093, |
| 7.249998 |         |            | 7.244117 |         |            | 7.238237 |         |            |
| 16310,   | 204670, | 2901.0538, | 16348,   | 208460, | 2898.7006, | 16386,   | 206046, | 2896.3474, |
| 7.249843 |         |            | 7.243963 |         |            | 7.238082 |         |            |

|          |         |            |          |         |            |          |         |            |
|----------|---------|------------|----------|---------|------------|----------|---------|------------|
| 16387,   | 206092, | 2896.2855, | 16425,   | 205618, | 2893.9322, | 16463,   | 205122, | 2891.5790, |
| 7.237927 |         |            | 7.232046 |         |            | 7.226165 |         |            |
| 16388,   | 206346, | 2896.2235, | 16426,   | 206426, | 2893.8703, | 16464,   | 205116, | 2891.5171, |
| 7.237772 |         |            | 7.231892 |         |            | 7.226011 |         |            |
| 16389,   | 206504, | 2896.1616, | 16427,   | 207308, | 2893.8084, | 16465,   | 205228, | 2891.4552, |
| 7.237618 |         |            | 7.231737 |         |            | 7.225856 |         |            |
| 16390,   | 206324, | 2896.0997, | 16428,   | 207580, | 2893.7465, | 16466,   | 205104, | 2891.3932, |
| 7.237463 |         |            | 7.231582 |         |            | 7.225701 |         |            |
| 16391,   | 205866, | 2896.0378, | 16429,   | 207126, | 2893.6845, | 16467,   | 204654, | 2891.3313, |
| 7.237308 |         |            | 7.231427 |         |            | 7.225546 |         |            |
| 16392,   | 205404, | 2895.9758, | 16430,   | 206430, | 2893.6226, | 16468,   | 204120, | 2891.2694, |
| 7.237153 |         |            | 7.231272 |         |            | 7.225392 |         |            |
| 16393,   | 205146, | 2895.9139, | 16431,   | 206060, | 2893.5607, | 16469,   | 203848, | 2891.2075, |
| 7.236999 |         |            | 7.231118 |         |            | 7.225237 |         |            |
| 16394,   | 205084, | 2895.8520, | 16432,   | 206126, | 2893.4988, | 16470,   | 204002, | 2891.1455, |
| 7.236844 |         |            | 7.230963 |         |            | 7.225082 |         |            |
| 16395,   | 205082, | 2895.7900, | 16433,   | 206268, | 2893.4368, | 16471,   | 204474, | 2891.0836, |
| 7.236689 |         |            | 7.230808 |         |            | 7.224927 |         |            |
| 16396,   | 205116, | 2895.7281, | 16434,   | 206102, | 2893.3749, | 16472,   | 205036, | 2891.0217, |
| 7.236534 |         |            | 7.230653 |         |            | 7.224773 |         |            |
| 16397,   | 205284, | 2895.6662, | 16435,   | 205596, | 2893.3130, | 16473,   | 205448, | 2890.9597, |
| 7.236379 |         |            | 7.230499 |         |            | 7.224618 |         |            |
| 16398,   | 205652, | 2895.6043, | 16436,   | 205088, | 2893.2510, | 16474,   | 205536, | 2890.8978, |
| 7.236225 |         |            | 7.230344 |         |            | 7.224463 |         |            |
| 16399,   | 206072, | 2895.5423, | 16437,   | 204922, | 2893.1891, | 16475,   | 205206, | 2890.8359, |
| 7.236070 |         |            | 7.230189 |         |            | 7.224308 |         |            |
| 16400,   | 206290, | 2895.4804, | 16438,   | 205176, | 2893.1272, | 16476,   | 204538, | 2890.7740, |
| 7.235915 |         |            | 7.230034 |         |            | 7.224154 |         |            |
| 16401,   | 206184, | 2895.4185, | 16439,   | 205668, | 2893.0653, | 16477,   | 203842, | 2890.7120, |
| 7.235760 |         |            | 7.229880 |         |            | 7.223999 |         |            |
| 16402,   | 205876, | 2895.3566, | 16440,   | 206126, | 2893.0033, | 16478,   | 203534, | 2890.6501, |
| 7.235606 |         |            | 7.229725 |         |            | 7.223844 |         |            |
| 16403,   | 205592, | 2895.2946, | 16441,   | 206338, | 2892.9414, | 16479,   | 203840, | 2890.5882, |
| 7.235451 |         |            | 7.229570 |         |            | 7.223689 |         |            |
| 16404,   | 205412, | 2895.2327, | 16442,   | 206210, | 2892.8795, | 16480,   | 204600, | 2890.5263, |
| 7.235296 |         |            | 7.229415 |         |            | 7.223535 |         |            |
| 16405,   | 205262, | 2895.1708, | 16443,   | 205810, | 2892.8176, | 16481,   | 205380, | 2890.4643, |
| 7.235141 |         |            | 7.229261 |         |            | 7.223380 |         |            |
| 16406,   | 205076, | 2895.1089, | 16444,   | 205416, | 2892.7556, | 16482,   | 205860, | 2890.4024, |
| 7.234987 |         |            | 7.229106 |         |            | 7.223225 |         |            |
| 16407,   | 204980, | 2895.0469, | 16445,   | 205410, | 2892.6937, | 16483,   | 206068, | 2890.3405, |
| 7.234832 |         |            | 7.228951 |         |            | 7.223070 |         |            |
| 16408,   | 205160, | 2894.9850, | 16446,   | 206012, | 2892.6318, | 16484,   | 206256, | 2890.2786, |
| 7.234677 |         |            | 7.228796 |         |            | 7.222916 |         |            |
| 16409,   | 205612, | 2894.9231, | 16447,   | 207012, | 2892.5698, | 16485,   | 206592, | 2890.2166, |
| 7.234522 |         |            | 7.228642 |         |            | 7.222761 |         |            |
| 16410,   | 206070, | 2894.8611, | 16448,   | 207806, | 2892.5079, | 16486,   | 206934, | 2890.1547, |
| 7.234368 |         |            | 7.228487 |         |            | 7.222606 |         |            |
| 16411,   | 206264, | 2894.7992, | 16449,   | 207874, | 2892.4460, | 16487,   | 207026, | 2890.0928, |
| 7.234213 |         |            | 7.228332 |         |            | 7.222451 |         |            |
| 16412,   | 206222, | 2894.7373, | 16450,   | 207216, | 2892.3841, | 16488,   | 206812, | 2890.0308, |
| 7.234058 |         |            | 7.228177 |         |            | 7.222297 |         |            |
| 16413,   | 206270, | 2894.6754, | 16451,   | 206384, | 2892.3221, | 16489,   | 206526, | 2889.9689, |
| 7.233903 |         |            | 7.228023 |         |            | 7.222142 |         |            |
| 16414,   | 206662, | 2894.6134, | 16452,   | 205988, | 2892.2602, | 16490,   | 206474, | 2889.9070, |
| 7.233749 |         |            | 7.227868 |         |            | 7.221987 |         |            |
| 16415,   | 207270, | 2894.5515, | 16453,   | 206194, | 2892.1983, | 16491,   | 206722, | 2889.8451, |
| 7.233594 |         |            | 7.227713 |         |            | 7.221832 |         |            |
| 16416,   | 207688, | 2894.4896, | 16454,   | 206640, | 2892.1364, | 16492,   | 207054, | 2889.7831, |
| 7.233439 |         |            | 7.227558 |         |            | 7.221677 |         |            |
| 16417,   | 207666, | 2894.4277, | 16455,   | 206868, | 2892.0744, | 16493,   | 207204, | 2889.7212, |
| 7.233284 |         |            | 7.227404 |         |            | 7.221523 |         |            |
| 16418,   | 207388, | 2894.3657, | 16456,   | 206776, | 2892.0125, | 16494,   | 207136, | 2889.6593, |
| 7.233130 |         |            | 7.227249 |         |            | 7.221368 |         |            |
| 16419,   | 207240, | 2894.3038, | 16457,   | 206616, | 2891.9506, | 16495,   | 207002, | 2889.5974, |
| 7.232975 |         |            | 7.227094 |         |            | 7.221213 |         |            |
| 16420,   | 207348, | 2894.2419, | 16458,   | 206620, | 2891.8887, | 16496,   | 206948, | 2889.5354, |
| 7.232820 |         |            | 7.226939 |         |            | 7.221058 |         |            |
| 16421,   | 207396, | 2894.1799, | 16459,   | 206710, | 2891.8267, | 16497,   | 206996, | 2889.4735, |
| 7.232665 |         |            | 7.226785 |         |            | 7.220904 |         |            |
| 16422,   | 206984, | 2894.1180, | 16460,   | 206580, | 2891.7648, | 16498,   | 207096, | 2889.4116, |
| 7.232511 |         |            | 7.226630 |         |            | 7.220749 |         |            |
| 16423,   | 206170, | 2894.0561, | 16461,   | 206100, | 2891.7029, | 16499,   | 207296, | 2889.3496, |
| 7.232356 |         |            | 7.226475 |         |            | 7.220594 |         |            |
| 16424,   | 205526, | 2893.9942, | 16462,   | 205490, | 2891.6409, | 16500,   | 207700, | 2889.2877, |
| 7.232201 |         |            | 7.226320 |         |            | 7.220439 |         |            |

|          |         |            |          |         |            |          |         |            |
|----------|---------|------------|----------|---------|------------|----------|---------|------------|
| 16501,   | 208330, | 2889.2258, | 16539,   | 204074, | 2886.8726, | 16577,   | 205580, | 2884.5194, |
| 7.220285 |         |            | 7.214404 |         |            | 7.208523 |         |            |
| 16502,   | 209014, | 2889.1639, | 16540,   | 204500, | 2886.8106, | 16578,   | 206546, | 2884.4574, |
| 7.220130 |         |            | 7.214249 |         |            | 7.208368 |         |            |
| 16503,   | 209526, | 2889.1019, | 16541,   | 204472, | 2886.7487, | 16579,   | 207308, | 2884.3955, |
| 7.219975 |         |            | 7.214094 |         |            | 7.208214 |         |            |
| 16504,   | 209784, | 2889.0400, | 16542,   | 204038, | 2886.6868, | 16580,   | 207306, | 2884.3336, |
| 7.219820 |         |            | 7.213940 |         |            | 7.208059 |         |            |
| 16505,   | 209922, | 2888.9781, | 16543,   | 203640, | 2886.6249, | 16581,   | 206732, | 2884.2716, |
| 7.219666 |         |            | 7.213785 |         |            | 7.207904 |         |            |
| 16506,   | 210088, | 2888.9162, | 16544,   | 203674, | 2886.5629, | 16582,   | 206282, | 2884.2097, |
| 7.219511 |         |            | 7.213630 |         |            | 7.207749 |         |            |
| 16507,   | 210268, | 2888.8542, | 16545,   | 204120, | 2886.5010, | 16583,   | 206504, | 2884.1478, |
| 7.219356 |         |            | 7.213475 |         |            | 7.207595 |         |            |
| 16508,   | 210298, | 2888.7923, | 16546,   | 204662, | 2886.4391, | 16584,   | 207396, | 2884.0859, |
| 7.219201 |         |            | 7.213321 |         |            | 7.207440 |         |            |
| 16509,   | 210074, | 2888.7304, | 16547,   | 205098, | 2886.3772, | 16585,   | 208528, | 2884.0239, |
| 7.219047 |         |            | 7.213166 |         |            | 7.207285 |         |            |
| 16510,   | 209702, | 2888.6685, | 16548,   | 205560, | 2886.3152, | 16586,   | 209480, | 2883.9620, |
| 7.218892 |         |            | 7.213011 |         |            | 7.207130 |         |            |
| 16511,   | 209370, | 2888.6065, | 16549,   | 206292, | 2886.2533, | 16587,   | 210112, | 2883.9001, |
| 7.218737 |         |            | 7.212856 |         |            | 7.206976 |         |            |
| 16512,   | 209106, | 2888.5446, | 16550,   | 207262, | 2886.1914, | 16588,   | 210494, | 2883.8382, |
| 7.218582 |         |            | 7.212702 |         |            | 7.206821 |         |            |
| 16513,   | 208748, | 2888.4827, | 16551,   | 208094, | 2886.1294, | 16589,   | 210716, | 2883.7762, |
| 7.218428 |         |            | 7.212547 |         |            | 7.206666 |         |            |
| 16514,   | 208188, | 2888.4207, | 16552,   | 208438, | 2886.0675, | 16590,   | 210814, | 2883.7143, |
| 7.218273 |         |            | 7.212392 |         |            | 7.206511 |         |            |
| 16515,   | 207598, | 2888.3588, | 16553,   | 208348, | 2886.0056, | 16591,   | 210832, | 2883.6524, |
| 7.218118 |         |            | 7.212237 |         |            | 7.206356 |         |            |
| 16516,   | 207340, | 2888.2969, | 16554,   | 208222, | 2885.9437, | 16592,   | 210828, | 2883.5904, |
| 7.217963 |         |            | 7.212083 |         |            | 7.206202 |         |            |
| 16517,   | 207636, | 2888.2350, | 16555,   | 208374, | 2885.8817, | 16593,   | 210766, | 2883.5285, |
| 7.217809 |         |            | 7.211928 |         |            | 7.206047 |         |            |
| 16518,   | 208300, | 2888.1730, | 16556,   | 208702, | 2885.8198, | 16594,   | 210492, | 2883.4666, |
| 7.217654 |         |            | 7.211773 |         |            | 7.205892 |         |            |
| 16519,   | 208896, | 2888.1111, | 16557,   | 208836, | 2885.7579, | 16595,   | 209892, | 2883.4047, |
| 7.217499 |         |            | 7.211618 |         |            | 7.205737 |         |            |
| 16520,   | 209150, | 2888.0492, | 16558,   | 208584, | 2885.6960, | 16596,   | 209074, | 2883.3427, |
| 7.217344 |         |            | 7.211463 |         |            | 7.205583 |         |            |
| 16521,   | 209184, | 2887.9873, | 16559,   | 208170, | 2885.6340, | 16597,   | 208334, | 2883.2808, |
| 7.217190 |         |            | 7.211309 |         |            | 7.205428 |         |            |
| 16522,   | 209306, | 2887.9253, | 16560,   | 207966, | 2885.5721, | 16598,   | 207892, | 2883.2189, |
| 7.217035 |         |            | 7.211154 |         |            | 7.205273 |         |            |
| 16523,   | 209638, | 2887.8634, | 16561,   | 208076, | 2885.5102, | 16599,   | 207662, | 2883.1570, |
| 7.216880 |         |            | 7.210999 |         |            | 7.205118 |         |            |
| 16524,   | 209940, | 2887.8015, | 16562,   | 208254, | 2885.4483, | 16600,   | 207364, | 2883.0950, |
| 7.216725 |         |            | 7.210844 |         |            | 7.204964 |         |            |
| 16525,   | 209852, | 2887.7395, | 16563,   | 208238, | 2885.3863, | 16601,   | 206902, | 2883.0331, |
| 7.216570 |         |            | 7.210690 |         |            | 7.204809 |         |            |
| 16526,   | 209292, | 2887.6776, | 16564,   | 208106, | 2885.3244, | 16602,   | 206558, | 2882.9712, |
| 7.216416 |         |            | 7.210535 |         |            | 7.204654 |         |            |
| 16527,   | 208522, | 2887.6157, | 16565,   | 208196, | 2885.2625, | 16603,   | 206758, | 2882.9093, |
| 7.216261 |         |            | 7.210380 |         |            | 7.204499 |         |            |
| 16528,   | 207920, | 2887.5538, | 16566,   | 208696, | 2885.2005, | 16604,   | 207614, | 2882.8473, |
| 7.216106 |         |            | 7.210225 |         |            | 7.204345 |         |            |
| 16529,   | 207646, | 2887.4918, | 16567,   | 209360, | 2885.1386, | 16605,   | 208710, | 2882.7854, |
| 7.215951 |         |            | 7.210071 |         |            | 7.204190 |         |            |
| 16530,   | 207590, | 2887.4299, | 16568,   | 209756, | 2885.0767, | 16606,   | 209452, | 2882.7235, |
| 7.215797 |         |            | 7.209916 |         |            | 7.204035 |         |            |
| 16531,   | 207536, | 2887.3680, | 16569,   | 209714, | 2885.0148, | 16607,   | 209572, | 2882.6615, |
| 7.215642 |         |            | 7.209761 |         |            | 7.203880 |         |            |
| 16532,   | 207328, | 2887.3061, | 16570,   | 209444, | 2884.9528, | 16608,   | 209324, | 2882.5996, |
| 7.215487 |         |            | 7.209606 |         |            | 7.203726 |         |            |
| 16533,   | 206894, | 2887.2441, | 16571,   | 209226, | 2884.8909, | 16609,   | 209150, | 2882.5377, |
| 7.215332 |         |            | 7.209452 |         |            | 7.203571 |         |            |
| 16534,   | 206170, | 2887.1822, | 16572,   | 208986, | 2884.8290, | 16610,   | 209224, | 2882.4758, |
| 7.215178 |         |            | 7.209297 |         |            | 7.203416 |         |            |
| 16535,   | 205198, | 2887.1203, | 16573,   | 208364, | 2884.7671, | 16611,   | 209324, | 2882.4138, |
| 7.215023 |         |            | 7.209142 |         |            | 7.203261 |         |            |
| 16536,   | 204214, | 2887.0584, | 16574,   | 207208, | 2884.7051, | 16612,   | 209146, | 2882.3519, |
| 7.214868 |         |            | 7.208987 |         |            | 7.203107 |         |            |
| 16537,   | 203596, | 2886.9964, | 16575,   | 205924, | 2884.6432, | 16613,   | 208634, | 2882.2900, |
| 7.214713 |         |            | 7.208833 |         |            | 7.202952 |         |            |
| 16538,   | 203606, | 2886.9345, | 16576,   | 205252, | 2884.5813, | 16614,   | 208004, | 2882.2281, |
| 7.214559 |         |            | 7.208678 |         |            | 7.202797 |         |            |

|          |         |            |          |         |            |          |         |            |
|----------|---------|------------|----------|---------|------------|----------|---------|------------|
| 16615,   | 207458, | 2882.1661, | 16653,   | 207954, | 2879.8129, | 16691,   | 211032, | 2877.4597, |
| 7.202642 |         |            | 7.196762 |         |            | 7.190881 |         |            |
| 16616,   | 207006, | 2882.1042, | 16654,   | 208520, | 2879.7510, | 16692,   | 211494, | 2877.3978, |
| 7.202488 |         |            | 7.196607 |         |            | 7.190726 |         |            |
| 16617,   | 206566, | 2882.0423, | 16655,   | 208906, | 2879.6891, | 16693,   | 211600, | 2877.3358, |
| 7.202333 |         |            | 7.196452 |         |            | 7.190571 |         |            |
| 16618,   | 206216, | 2881.9803, | 16656,   | 208848, | 2879.6271, | 16694,   | 211014, | 2877.2739, |
| 7.202178 |         |            | 7.196297 |         |            | 7.190416 |         |            |
| 16619,   | 206188, | 2881.9184, | 16657,   | 208574, | 2879.5652, | 16695,   | 209982, | 2877.2120, |
| 7.202023 |         |            | 7.196142 |         |            | 7.190262 |         |            |
| 16620,   | 206602, | 2881.8565, | 16658,   | 208430, | 2879.5033, | 16696,   | 209072, | 2877.1500, |
| 7.201869 |         |            | 7.195988 |         |            | 7.190107 |         |            |
| 16621,   | 207288, | 2881.7946, | 16659,   | 208488, | 2879.4413, | 16697,   | 208702, | 2877.0881, |
| 7.201714 |         |            | 7.195833 |         |            | 7.189952 |         |            |
| 16622,   | 207876, | 2881.7326, | 16660,   | 208554, | 2879.3794, | 16698,   | 208896, | 2877.0262, |
| 7.201559 |         |            | 7.195678 |         |            | 7.189797 |         |            |
| 16623,   | 208172, | 2881.6707, | 16661,   | 208504, | 2879.3175, | 16699,   | 209436, | 2876.9643, |
| 7.201404 |         |            | 7.195523 |         |            | 7.189643 |         |            |
| 16624,   | 208330, | 2881.6088, | 16662,   | 208464, | 2879.2556, | 16700,   | 210118, | 2876.9023, |
| 7.201249 |         |            | 7.195369 |         |            | 7.189488 |         |            |
| 16625,   | 208624, | 2881.5469, | 16663,   | 208616, | 2879.1936, | 16701,   | 210808, | 2876.8404, |
| 7.201095 |         |            | 7.195214 |         |            | 7.189333 |         |            |
| 16626,   | 209126, | 2881.4849, | 16664,   | 208878, | 2879.1317, | 16702,   | 211384, | 2876.7785, |
| 7.200940 |         |            | 7.195059 |         |            | 7.189178 |         |            |
| 16627,   | 209608, | 2881.4230, | 16665,   | 208946, | 2879.0698, | 16703,   | 211686, | 2876.7166, |
| 7.200785 |         |            | 7.194904 |         |            | 7.189024 |         |            |
| 16628,   | 209788, | 2881.3611, | 16666,   | 208668, | 2879.0079, | 16704,   | 211660, | 2876.6546, |
| 7.200630 |         |            | 7.194750 |         |            | 7.188869 |         |            |
| 16629,   | 209632, | 2881.2992, | 16667,   | 208316, | 2878.9459, | 16705,   | 211448, | 2876.5927, |
| 7.200476 |         |            | 7.194595 |         |            | 7.188714 |         |            |
| 16630,   | 209356, | 2881.2372, | 16668,   | 208384, | 2878.8840, | 16706,   | 211308, | 2876.5308, |
| 7.200321 |         |            | 7.194440 |         |            | 7.188559 |         |            |
| 16631,   | 209118, | 2881.1753, | 16669,   | 209054, | 2878.8221, | 16707,   | 211340, | 2876.4689, |
| 7.200166 |         |            | 7.194285 |         |            | 7.188405 |         |            |
| 16632,   | 208842, | 2881.1134, | 16670,   | 209898, | 2878.7601, | 16708,   | 211400, | 2876.4069, |
| 7.200011 |         |            | 7.194131 |         |            | 7.188250 |         |            |
| 16633,   | 208356, | 2881.0514, | 16671,   | 210258, | 2878.6982, | 16709,   | 211282, | 2876.3450, |
| 7.199857 |         |            | 7.193976 |         |            | 7.188095 |         |            |
| 16634,   | 207676, | 2880.9895, | 16672,   | 209854, | 2878.6363, | 16710,   | 210956, | 2876.2831, |
| 7.199702 |         |            | 7.193821 |         |            | 7.187940 |         |            |
| 16635,   | 207080, | 2880.9276, | 16673,   | 209014, | 2878.5744, | 16711,   | 210628, | 2876.2211, |
| 7.199547 |         |            | 7.193666 |         |            | 7.187786 |         |            |
| 16636,   | 206858, | 2880.8657, | 16674,   | 208298, | 2878.5124, | 16712,   | 210498, | 2876.1592, |
| 7.199392 |         |            | 7.193512 |         |            | 7.187631 |         |            |
| 16637,   | 207016, | 2880.8037, | 16675,   | 207940, | 2878.4505, | 16713,   | 210558, | 2876.0973, |
| 7.199238 |         |            | 7.193357 |         |            | 7.187476 |         |            |
| 16638,   | 207276, | 2880.7418, | 16676,   | 207718, | 2878.3886, | 16714,   | 210650, | 2876.0354, |
| 7.199083 |         |            | 7.193202 |         |            | 7.187321 |         |            |
| 16639,   | 207380, | 2880.6799, | 16677,   | 207344, | 2878.3267, | 16715,   | 210684, | 2875.9734, |
| 7.198928 |         |            | 7.193047 |         |            | 7.187167 |         |            |
| 16640,   | 207294, | 2880.6180, | 16678,   | 206906, | 2878.2647, | 16716,   | 210770, | 2875.9115, |
| 7.198773 |         |            | 7.192893 |         |            | 7.187012 |         |            |
| 16641,   | 207136, | 2880.5560, | 16679,   | 206818, | 2878.2028, | 16717,   | 211018, | 2875.8496, |
| 7.198619 |         |            | 7.192738 |         |            | 7.186857 |         |            |
| 16642,   | 206966, | 2880.4941, | 16680,   | 207374, | 2878.1409, | 16718,   | 211320, | 2875.7877, |
| 7.198464 |         |            | 7.192583 |         |            | 7.186702 |         |            |
| 16643,   | 206738, | 2880.4322, | 16681,   | 208430, | 2878.0790, | 16719,   | 211344, | 2875.7257, |
| 7.198309 |         |            | 7.192428 |         |            | 7.186548 |         |            |
| 16644,   | 206502, | 2880.3702, | 16682,   | 209538, | 2878.0170, | 16720,   | 210870, | 2875.6638, |
| 7.198154 |         |            | 7.192274 |         |            | 7.186393 |         |            |
| 16645,   | 206566, | 2880.3083, | 16683,   | 210422, | 2877.9551, | 16721,   | 210066, | 2875.6019, |
| 7.198000 |         |            | 7.192119 |         |            | 7.186238 |         |            |
| 16646,   | 207250, | 2880.2464, | 16684,   | 211124, | 2877.8932, | 16722,   | 209372, | 2875.5399, |
| 7.197845 |         |            | 7.191964 |         |            | 7.186083 |         |            |
| 16647,   | 208484, | 2880.1845, | 16685,   | 211786, | 2877.8312, | 16723,   | 209114, | 2875.4780, |
| 7.197690 |         |            | 7.191809 |         |            | 7.185928 |         |            |
| 16648,   | 209652, | 2880.1225, | 16686,   | 212306, | 2877.7693, | 16724,   | 209234, | 2875.4161, |
| 7.197535 |         |            | 7.191655 |         |            | 7.185774 |         |            |
| 16649,   | 210030, | 2880.0606, | 16687,   | 212382, | 2877.7074, | 16725,   | 209420, | 2875.3542, |
| 7.197381 |         |            | 7.191500 |         |            | 7.185619 |         |            |
| 16650,   | 209438, | 2879.9987, | 16688,   | 211900, | 2877.6455, | 16726,   | 209486, | 2875.2922, |
| 7.197226 |         |            | 7.191345 |         |            | 7.185464 |         |            |
| 16651,   | 208432, | 2879.9368, | 16689,   | 211194, | 2877.5835, | 16727,   | 209522, | 2875.2303, |
| 7.197071 |         |            | 7.191190 |         |            | 7.185309 |         |            |
| 16652,   | 207816, | 2879.8748, | 16690,   | 210820, | 2877.5216, | 16728,   | 209696, | 2875.1684, |
| 7.196916 |         |            | 7.191035 |         |            | 7.185155 |         |            |

|          |         |            |          |         |            |          |         |            |
|----------|---------|------------|----------|---------|------------|----------|---------|------------|
| 16729,   | 209976, | 2875.1065, | 16767,   | 208798, | 2872.7532, | 16805,   | 210788, | 2870.4000, |
| 7.185000 |         |            | 7.179119 |         |            | 7.173238 |         |            |
| 16730,   | 210120, | 2875.0445, | 16768,   | 208956, | 2872.6913, | 16806,   | 210588, | 2870.3381, |
| 7.184845 |         |            | 7.178964 |         |            | 7.173084 |         |            |
| 16731,   | 209966, | 2874.9826, | 16769,   | 209062, | 2872.6294, | 16807,   | 210212, | 2870.2762, |
| 7.184690 |         |            | 7.178810 |         |            | 7.172929 |         |            |
| 16732,   | 209624, | 2874.9207, | 16770,   | 208956, | 2872.5675, | 16808,   | 209686, | 2870.2142, |
| 7.184536 |         |            | 7.178655 |         |            | 7.172774 |         |            |
| 16733,   | 209322, | 2874.8588, | 16771,   | 208724, | 2872.5055, | 16809,   | 209252, | 2870.1523, |
| 7.184381 |         |            | 7.178500 |         |            | 7.172619 |         |            |
| 16734,   | 209088, | 2874.7968, | 16772,   | 208514, | 2872.4436, | 16810,   | 209146, | 2870.0904, |
| 7.184226 |         |            | 7.178345 |         |            | 7.172465 |         |            |
| 16735,   | 208660, | 2874.7349, | 16773,   | 208332, | 2872.3817, | 16811,   | 209348, | 2870.0285, |
| 7.184071 |         |            | 7.178191 |         |            | 7.172310 |         |            |
| 16736,   | 207792, | 2874.6730, | 16774,   | 208098, | 2872.3197, | 16812,   | 209690, | 2869.9665, |
| 7.183917 |         |            | 7.178036 |         |            | 7.172155 |         |            |
| 16737,   | 206642, | 2874.6110, | 16775,   | 207860, | 2872.2578, | 16813,   | 210054, | 2869.9046, |
| 7.183762 |         |            | 7.177881 |         |            | 7.172000 |         |            |
| 16738,   | 205738, | 2874.5491, | 16776,   | 207836, | 2872.1959, | 16814,   | 210476, | 2869.8427, |
| 7.183607 |         |            | 7.177726 |         |            | 7.171846 |         |            |
| 16739,   | 205552, | 2874.4872, | 16777,   | 208232, | 2872.1340, | 16815,   | 210998, | 2869.7807, |
| 7.183452 |         |            | 7.177572 |         |            | 7.171691 |         |            |
| 16740,   | 206084, | 2874.4253, | 16778,   | 208968, | 2872.0720, | 16816,   | 211538, | 2869.7188, |
| 7.183298 |         |            | 7.177417 |         |            | 7.171536 |         |            |
| 16741,   | 206924, | 2874.3633, | 16779,   | 209672, | 2872.0101, | 16817,   | 211910, | 2869.6569, |
| 7.183143 |         |            | 7.177262 |         |            | 7.171381 |         |            |
| 16742,   | 207688, | 2874.3014, | 16780,   | 210006, | 2871.9482, | 16818,   | 211996, | 2869.5950, |
| 7.182988 |         |            | 7.177107 |         |            | 7.171226 |         |            |
| 16743,   | 208308, | 2874.2395, | 16781,   | 209922, | 2871.8863, | 16819,   | 211854, | 2869.5330, |
| 7.182833 |         |            | 7.176953 |         |            | 7.171072 |         |            |
| 16744,   | 208904, | 2874.1776, | 16782,   | 209650, | 2871.8243, | 16820,   | 211616, | 2869.4711, |
| 7.182679 |         |            | 7.176798 |         |            | 7.170917 |         |            |
| 16745,   | 209446, | 2874.1156, | 16783,   | 209432, | 2871.7624, | 16821,   | 211308, | 2869.4092, |
| 7.182524 |         |            | 7.176643 |         |            | 7.170762 |         |            |
| 16746,   | 209692, | 2874.0537, | 16784,   | 209312, | 2871.7005, | 16822,   | 210890, | 2869.3473, |
| 7.182369 |         |            | 7.176488 |         |            | 7.170607 |         |            |
| 16747,   | 209518, | 2873.9918, | 16785,   | 209236, | 2871.6386, | 16823,   | 210372, | 2869.2853, |
| 7.182214 |         |            | 7.176333 |         |            | 7.170453 |         |            |
| 16748,   | 209220, | 2873.9298, | 16786,   | 209242, | 2871.5766, | 16824,   | 209932, | 2869.2234, |
| 7.182060 |         |            | 7.176179 |         |            | 7.170298 |         |            |
| 16749,   | 209346, | 2873.8679, | 16787,   | 209486, | 2871.5147, | 16825,   | 209736, | 2869.1615, |
| 7.181905 |         |            | 7.176024 |         |            | 7.170143 |         |            |
| 16750,   | 210136, | 2873.8060, | 16788,   | 210044, | 2871.4528, | 16826,   | 209754, | 2869.0996, |
| 7.181750 |         |            | 7.175869 |         |            | 7.169988 |         |            |
| 16751,   | 211200, | 2873.7441, | 16789,   | 210770, | 2871.3908, | 16827,   | 209726, | 2869.0376, |
| 7.181595 |         |            | 7.175714 |         |            | 7.169834 |         |            |
| 16752,   | 211820, | 2873.6821, | 16790,   | 211400, | 2871.3289, | 16828,   | 209424, | 2868.9757, |
| 7.181440 |         |            | 7.175560 |         |            | 7.169679 |         |            |
| 16753,   | 211626, | 2873.6202, | 16791,   | 211808, | 2871.2670, | 16829,   | 208936, | 2868.9138, |
| 7.181286 |         |            | 7.175405 |         |            | 7.169524 |         |            |
| 16754,   | 210976, | 2873.5583, | 16792,   | 212122, | 2871.2051, | 16830,   | 208622, | 2868.8518, |
| 7.181131 |         |            | 7.175250 |         |            | 7.169369 |         |            |
| 16755,   | 210564, | 2873.4964, | 16793,   | 212516, | 2871.1431, | 16831,   | 208796, | 2868.7899, |
| 7.180976 |         |            | 7.175095 |         |            | 7.169215 |         |            |
| 16756,   | 210716, | 2873.4344, | 16794,   | 212954, | 2871.0812, | 16832,   | 209458, | 2868.7280, |
| 7.180821 |         |            | 7.174941 |         |            | 7.169060 |         |            |
| 16757,   | 211088, | 2873.3725, | 16795,   | 213206, | 2871.0193, | 16833,   | 210290, | 2868.6661, |
| 7.180667 |         |            | 7.174786 |         |            | 7.168905 |         |            |
| 16758,   | 211080, | 2873.3106, | 16796,   | 213102, | 2870.9574, | 16834,   | 210972, | 2868.6041, |
| 7.180512 |         |            | 7.174631 |         |            | 7.168750 |         |            |
| 16759,   | 210488, | 2873.2487, | 16797,   | 212782, | 2870.8954, | 16835,   | 211376, | 2868.5422, |
| 7.180357 |         |            | 7.174476 |         |            | 7.168596 |         |            |
| 16760,   | 209704, | 2873.1867, | 16798,   | 212578, | 2870.8335, | 16836,   | 211488, | 2868.4803, |
| 7.180202 |         |            | 7.174322 |         |            | 7.168441 |         |            |
| 16761,   | 209274, | 2873.1248, | 16799,   | 212654, | 2870.7716, | 16837,   | 211304, | 2868.4184, |
| 7.180048 |         |            | 7.174167 |         |            | 7.168286 |         |            |
| 16762,   | 209350, | 2873.0629, | 16800,   | 212830, | 2870.7097, | 16838,   | 210786, | 2868.3564, |
| 7.179893 |         |            | 7.174012 |         |            | 7.168131 |         |            |
| 16763,   | 209572, | 2873.0009, | 16801,   | 212742, | 2870.6477, | 16839,   | 210072, | 2868.2945, |
| 7.179738 |         |            | 7.173857 |         |            | 7.167977 |         |            |
| 16764,   | 209530, | 2872.9390, | 16802,   | 212250, | 2870.5858, | 16840,   | 209506, | 2868.2326, |
| 7.179583 |         |            | 7.173703 |         |            | 7.167822 |         |            |
| 16765,   | 209188, | 2872.8771, | 16803,   | 211570, | 2870.5239, | 16841,   | 209448, | 2868.1706, |
| 7.179429 |         |            | 7.173548 |         |            | 7.167667 |         |            |
| 16766,   | 208856, | 2872.8152, | 16804,   | 211050, | 2870.4619, | 16842,   | 209928, | 2868.1087, |
| 7.179274 |         |            | 7.173393 |         |            | 7.167512 |         |            |

|          |         |            |          |         |            |          |         |            |
|----------|---------|------------|----------|---------|------------|----------|---------|------------|
| 16843,   | 210592, | 2868.0468, | 16881,   | 212906, | 2865.6936, | 16919,   | 208694, | 2863.3403, |
| 7.167358 |         |            | 7.161477 |         |            | 7.155596 |         |            |
| 16844,   | 211034, | 2867.9849, | 16882,   | 213380, | 2865.6316, | 16920,   | 208986, | 2863.2784, |
| 7.167203 |         |            | 7.161322 |         |            | 7.155441 |         |            |
| 16845,   | 211154, | 2867.9229, | 16883,   | 213678, | 2865.5697, | 16921,   | 208830, | 2863.2165, |
| 7.167048 |         |            | 7.161167 |         |            | 7.155286 |         |            |
| 16846,   | 211162, | 2867.8610, | 16884,   | 213780, | 2865.5078, | 16922,   | 208468, | 2863.1546, |
| 7.166893 |         |            | 7.161012 |         |            | 7.155132 |         |            |
| 16847,   | 211242, | 2867.7991, | 16885,   | 213764, | 2865.4459, | 16923,   | 208400, | 2863.0926, |
| 7.166739 |         |            | 7.160858 |         |            | 7.154977 |         |            |
| 16848,   | 211290, | 2867.7372, | 16886,   | 213596, | 2865.3839, | 16924,   | 208868, | 2863.0307, |
| 7.166584 |         |            | 7.160703 |         |            | 7.154822 |         |            |
| 16849,   | 211040, | 2867.6752, | 16887,   | 213110, | 2865.3220, | 16925,   | 209694, | 2862.9688, |
| 7.166429 |         |            | 7.160548 |         |            | 7.154667 |         |            |
| 16850,   | 210494, | 2867.6133, | 16888,   | 212260, | 2865.2601, | 16926,   | 210520, | 2862.9069, |
| 7.166274 |         |            | 7.160393 |         |            | 7.154513 |         |            |
| 16851,   | 210034, | 2867.5514, | 16889,   | 211328, | 2865.1982, | 16927,   | 211178, | 2862.8449, |
| 7.166119 |         |            | 7.160239 |         |            | 7.154358 |         |            |
| 16852,   | 210070, | 2867.4895, | 16890,   | 210730, | 2865.1362, | 16928,   | 211700, | 2862.7830, |
| 7.165965 |         |            | 7.160084 |         |            | 7.154203 |         |            |
| 16853,   | 210562, | 2867.4275, | 16891,   | 210646, | 2865.0743, | 16929,   | 212076, | 2862.7211, |
| 7.165810 |         |            | 7.159929 |         |            | 7.154048 |         |            |
| 16854,   | 210982, | 2867.3656, | 16892,   | 210818, | 2865.0124, | 16930,   | 212116, | 2862.6592, |
| 7.165655 |         |            | 7.159774 |         |            | 7.153894 |         |            |
| 16855,   | 210856, | 2867.3037, | 16893,   | 210836, | 2864.9504, | 16931,   | 211678, | 2862.5972, |
| 7.165500 |         |            | 7.159620 |         |            | 7.153739 |         |            |
| 16856,   | 210312, | 2867.2417, | 16894,   | 210548, | 2864.8885, | 16932,   | 210956, | 2862.5353, |
| 7.165346 |         |            | 7.159465 |         |            | 7.153584 |         |            |
| 16857,   | 210018, | 2867.1798, | 16895,   | 210200, | 2864.8266, | 16933,   | 210412, | 2862.4734, |
| 7.165191 |         |            | 7.159310 |         |            | 7.153429 |         |            |
| 16858,   | 210482, | 2867.1179, | 16896,   | 210150, | 2864.7647, | 16934,   | 210404, | 2862.4114, |
| 7.165036 |         |            | 7.159155 |         |            | 7.153275 |         |            |
| 16859,   | 211504, | 2867.0560, | 16897,   | 210464, | 2864.7027, | 16935,   | 210792, | 2862.3495, |
| 7.164881 |         |            | 7.159001 |         |            | 7.153120 |         |            |
| 16860,   | 212346, | 2866.9940, | 16898,   | 210910, | 2864.6408, | 16936,   | 211102, | 2862.2876, |
| 7.164727 |         |            | 7.158846 |         |            | 7.152965 |         |            |
| 16861,   | 212460, | 2866.9321, | 16899,   | 211248, | 2864.5789, | 16937,   | 211016, | 2862.2257, |
| 7.164572 |         |            | 7.158691 |         |            | 7.152810 |         |            |
| 16862,   | 212046, | 2866.8702, | 16900,   | 211466, | 2864.5170, | 16938,   | 210726, | 2862.1637, |
| 7.164417 |         |            | 7.158536 |         |            | 7.152656 |         |            |
| 16863,   | 211786, | 2866.8083, | 16901,   | 211684, | 2864.4550, | 16939,   | 210688, | 2862.1018, |
| 7.164262 |         |            | 7.158382 |         |            | 7.152501 |         |            |
| 16864,   | 212102, | 2866.7463, | 16902,   | 211876, | 2864.3931, | 16940,   | 211116, | 2862.0399, |
| 7.164108 |         |            | 7.158227 |         |            | 7.152346 |         |            |
| 16865,   | 212694, | 2866.6844, | 16903,   | 211800, | 2864.3312, | 16941,   | 211742, | 2861.9780, |
| 7.163953 |         |            | 7.158072 |         |            | 7.152191 |         |            |
| 16866,   | 212908, | 2866.6225, | 16904,   | 211308, | 2864.2693, | 16942,   | 212098, | 2861.9160, |
| 7.163798 |         |            | 7.157917 |         |            | 7.152037 |         |            |
| 16867,   | 212404, | 2866.5605, | 16905,   | 210626, | 2864.2073, | 16943,   | 212014, | 2861.8541, |
| 7.163643 |         |            | 7.157763 |         |            | 7.151882 |         |            |
| 16868,   | 211552, | 2866.4986, | 16906,   | 210236, | 2864.1454, | 16944,   | 211750, | 2861.7922, |
| 7.163489 |         |            | 7.157608 |         |            | 7.151727 |         |            |
| 16869,   | 210988, | 2866.4367, | 16907,   | 210434, | 2864.0835, | 16945,   | 211646, | 2861.7302, |
| 7.163334 |         |            | 7.157453 |         |            | 7.151572 |         |            |
| 16870,   | 211036, | 2866.3748, | 16908,   | 211014, | 2864.0215, | 16946,   | 211738, | 2861.6683, |
| 7.163179 |         |            | 7.157298 |         |            | 7.151418 |         |            |
| 16871,   | 211444, | 2866.3128, | 16909,   | 211458, | 2863.9596, | 16947,   | 211794, | 2861.6064, |
| 7.163024 |         |            | 7.157144 |         |            | 7.151263 |         |            |
| 16872,   | 211794, | 2866.2509, | 16910,   | 211436, | 2863.8977, | 16948,   | 211640, | 2861.5445, |
| 7.162870 |         |            | 7.156989 |         |            | 7.151108 |         |            |
| 16873,   | 211940, | 2866.1890, | 16911,   | 211076, | 2863.8358, | 16949,   | 211436, | 2861.4825, |
| 7.162715 |         |            | 7.156834 |         |            | 7.150953 |         |            |
| 16874,   | 212060, | 2866.1271, | 16912,   | 210714, | 2863.7738, | 16950,   | 211472, | 2861.4206, |
| 7.162560 |         |            | 7.156679 |         |            | 7.150798 |         |            |
| 16875,   | 212326, | 2866.0651, | 16913,   | 210458, | 2863.7119, | 16951,   | 211828, | 2861.3587, |
| 7.162405 |         |            | 7.156525 |         |            | 7.150644 |         |            |
| 16876,   | 212626, | 2866.0032, | 16914,   | 210090, | 2863.6500, | 16952,   | 212218, | 2861.2968, |
| 7.162251 |         |            | 7.156370 |         |            | 7.150489 |         |            |
| 16877,   | 212718, | 2865.9413, | 16915,   | 209416, | 2863.5881, | 16953,   | 212316, | 2861.2348, |
| 7.162096 |         |            | 7.156215 |         |            | 7.150334 |         |            |
| 16878,   | 212552, | 2865.8794, | 16916,   | 208604, | 2863.5261, | 16954,   | 212072, | 2861.1729, |
| 7.161941 |         |            | 7.156060 |         |            | 7.150179 |         |            |
| 16879,   | 212380, | 2865.8174, | 16917,   | 208122, | 2863.4642, | 16955,   | 211722, | 2861.1110, |
| 7.161786 |         |            | 7.155905 |         |            | 7.150025 |         |            |
| 16880,   | 212490, | 2865.7555, | 16918,   | 208232, | 2863.4023, | 16956,   | 211470, | 2861.0491, |
| 7.161632 |         |            | 7.155751 |         |            | 7.149870 |         |            |



|          |         |            |          |         |            |          |         |            |
|----------|---------|------------|----------|---------|------------|----------|---------|------------|
| 16957,   | 211250, | 2860.9871, | 16995,   | 212056, | 2858.6339, | 17033,   | 216284, | 2856.2807, |
| 7.149715 |         |            | 7.143834 |         |            | 7.137954 |         |            |
| 16958,   | 210898, | 2860.9252, | 16996,   | 211516, | 2858.5720, | 17034,   | 215642, | 2856.2188, |
| 7.149560 |         |            | 7.143680 |         |            | 7.137799 |         |            |
| 16959,   | 210444, | 2860.8633, | 16997,   | 210964, | 2858.5101, | 17035,   | 214376, | 2856.1568, |
| 7.149406 |         |            | 7.143525 |         |            | 7.137644 |         |            |
| 16960,   | 210204, | 2860.8013, | 16998,   | 210666, | 2858.4481, | 17036,   | 213290, | 2856.0949, |
| 7.149251 |         |            | 7.143370 |         |            | 7.137489 |         |            |
| 16961,   | 210450, | 2860.7394, | 16999,   | 210844, | 2858.3862, | 17037,   | 213006, | 2856.0330, |
| 7.149096 |         |            | 7.143215 |         |            | 7.137335 |         |            |
| 16962,   | 211066, | 2860.6775, | 17000,   | 211458, | 2858.3243, | 17038,   | 213426, | 2855.9710, |
| 7.148941 |         |            | 7.143061 |         |            | 7.137180 |         |            |
| 16963,   | 211606, | 2860.6156, | 17001,   | 212226, | 2858.2623, | 17039,   | 213964, | 2855.9091, |
| 7.148787 |         |            | 7.142906 |         |            | 7.137025 |         |            |
| 16964,   | 211760, | 2860.5536, | 17002,   | 212840, | 2858.2004, | 17040,   | 214188, | 2855.8472, |
| 7.148632 |         |            | 7.142751 |         |            | 7.136870 |         |            |
| 16965,   | 211674, | 2860.4917, | 17003,   | 213220, | 2858.1385, | 17041,   | 214206, | 2855.7853, |
| 7.148477 |         |            | 7.142596 |         |            | 7.136716 |         |            |
| 16966,   | 211760, | 2860.4298, | 17004,   | 213492, | 2858.0766, | 17042,   | 214390, | 2855.7233, |
| 7.148322 |         |            | 7.142442 |         |            | 7.136561 |         |            |
| 16967,   | 212216, | 2860.3679, | 17005,   | 213784, | 2858.0146, | 17043,   | 214828, | 2855.6614, |
| 7.148168 |         |            | 7.142287 |         |            | 7.136406 |         |            |
| 16968,   | 212740, | 2860.3059, | 17006,   | 214060, | 2857.9527, | 17044,   | 215156, | 2855.5995, |
| 7.148013 |         |            | 7.142132 |         |            | 7.136251 |         |            |
| 16969,   | 212840, | 2860.2440, | 17007,   | 214210, | 2857.8908, | 17045,   | 214952, | 2855.5376, |
| 7.147858 |         |            | 7.141977 |         |            | 7.136096 |         |            |
| 16970,   | 212352, | 2860.1821, | 17008,   | 214202, | 2857.8289, | 17046,   | 214250, | 2855.4756, |
| 7.147703 |         |            | 7.141823 |         |            | 7.135942 |         |            |
| 16971,   | 211610, | 2860.1201, | 17009,   | 214132, | 2857.7669, | 17047,   | 213504, | 2855.4137, |
| 7.147549 |         |            | 7.141668 |         |            | 7.135787 |         |            |
| 16972,   | 211130, | 2860.0582, | 17010,   | 214126, | 2857.7050, | 17048,   | 213114, | 2855.3518, |
| 7.147394 |         |            | 7.141513 |         |            | 7.135632 |         |            |
| 16973,   | 211112, | 2859.9963, | 17011,   | 214178, | 2857.6431, | 17049,   | 212996, | 2855.2899, |
| 7.147239 |         |            | 7.141358 |         |            | 7.135477 |         |            |
| 16974,   | 211356, | 2859.9344, | 17012,   | 214182, | 2857.5811, | 17050,   | 212736, | 2855.2279, |
| 7.147084 |         |            | 7.141204 |         |            | 7.135323 |         |            |
| 16975,   | 211634, | 2859.8724, | 17013,   | 214056, | 2857.5192, | 17051,   | 212098, | 2855.1660, |
| 7.146930 |         |            | 7.141049 |         |            | 7.135168 |         |            |
| 16976,   | 211968, | 2859.8105, | 17014,   | 213814, | 2857.4573, | 17052,   | 211330, | 2855.1041, |
| 7.146775 |         |            | 7.140894 |         |            | 7.135013 |         |            |
| 16977,   | 212578, | 2859.7486, | 17015,   | 213496, | 2857.3954, | 17053,   | 210878, | 2855.0421, |
| 7.146620 |         |            | 7.140739 |         |            | 7.134858 |         |            |
| 16978,   | 213468, | 2859.6867, | 17016,   | 213156, | 2857.3334, | 17054,   | 210926, | 2854.9802, |
| 7.146465 |         |            | 7.140584 |         |            | 7.134704 |         |            |
| 16979,   | 214274, | 2859.6247, | 17017,   | 212866, | 2857.2715, | 17055,   | 211186, | 2854.9183, |
| 7.146311 |         |            | 7.140430 |         |            | 7.134549 |         |            |
| 16980,   | 214568, | 2859.5628, | 17018,   | 212796, | 2857.2096, | 17056,   | 211254, | 2854.8564, |
| 7.146156 |         |            | 7.140275 |         |            | 7.134394 |         |            |
| 16981,   | 214296, | 2859.5009, | 17019,   | 213144, | 2857.1477, | 17057,   | 211006, | 2854.7944, |
| 7.146001 |         |            | 7.140120 |         |            | 7.134239 |         |            |
| 16982,   | 213864, | 2859.4390, | 17020,   | 213898, | 2857.0857, | 17058,   | 210652, | 2854.7325, |
| 7.145846 |         |            | 7.139965 |         |            | 7.134085 |         |            |
| 16983,   | 213778, | 2859.3770, | 17021,   | 214742, | 2857.0238, | 17059,   | 210422, | 2854.6706, |
| 7.145691 |         |            | 7.139811 |         |            | 7.133930 |         |            |
| 16984,   | 214124, | 2859.3151, | 17022,   | 215254, | 2856.9619, | 17060,   | 210244, | 2854.6087, |
| 7.145537 |         |            | 7.139656 |         |            | 7.133775 |         |            |
| 16985,   | 214532, | 2859.2532, | 17023,   | 215264, | 2856.9000, | 17061,   | 209926, | 2854.5467, |
| 7.145382 |         |            | 7.139501 |         |            | 7.133620 |         |            |
| 16986,   | 214576, | 2859.1912, | 17024,   | 215028, | 2856.8380, | 17062,   | 209490, | 2854.4848, |
| 7.145227 |         |            | 7.139346 |         |            | 7.133466 |         |            |
| 16987,   | 214182, | 2859.1293, | 17025,   | 214956, | 2856.7761, | 17063,   | 209282, | 2854.4229, |
| 7.145072 |         |            | 7.139192 |         |            | 7.133311 |         |            |
| 16988,   | 213664, | 2859.0674, | 17026,   | 215172, | 2856.7142, | 17064,   | 209628, | 2854.3609, |
| 7.144918 |         |            | 7.139037 |         |            | 7.133156 |         |            |
| 16989,   | 213346, | 2859.0055, | 17027,   | 215412, | 2856.6522, | 17065,   | 210420, | 2854.2990, |
| 7.144763 |         |            | 7.138882 |         |            | 7.133001 |         |            |
| 16990,   | 213276, | 2858.9435, | 17028,   | 215344, | 2856.5903, | 17066,   | 211110, | 2854.2371, |
| 7.144608 |         |            | 7.138727 |         |            | 7.132847 |         |            |
| 16991,   | 213262, | 2858.8816, | 17029,   | 215038, | 2856.5284, | 17067,   | 211178, | 2854.1752, |
| 7.144453 |         |            | 7.138573 |         |            | 7.132692 |         |            |
| 16992,   | 213128, | 2858.8197, | 17030,   | 214932, | 2856.4665, | 17068,   | 210644, | 2854.1132, |
| 7.144299 |         |            | 7.138418 |         |            | 7.132537 |         |            |
| 16993,   | 212852, | 2858.7578, | 17031,   | 215348, | 2856.4045, | 17069,   | 210064, | 2854.0513, |
| 7.144144 |         |            | 7.138263 |         |            | 7.132382 |         |            |
| 16994,   | 212496, | 2858.6958, | 17032,   | 216030, | 2856.3426, | 17070,   | 210036, | 2853.9894, |
| 7.143989 |         |            | 7.138108 |         |            | 7.132228 |         |            |

|          |         |            |          |         |            |          |         |            |
|----------|---------|------------|----------|---------|------------|----------|---------|------------|
| 17071,   | 210732, | 2853.9275, | 17109,   | 210208, | 2851.5742, | 17147,   | 214164, | 2849.2210, |
| 7.132073 |         |            | 7.126192 |         |            | 7.120311 |         |            |
| 17072,   | 211826, | 2853.8655, | 17110,   | 211186, | 2851.5123, | 17148,   | 214740, | 2849.1591, |
| 7.131918 |         |            | 7.126037 |         |            | 7.120156 |         |            |
| 17073,   | 212822, | 2853.8036, | 17111,   | 212250, | 2851.4504, | 17149,   | 214632, | 2849.0972, |
| 7.131763 |         |            | 7.125882 |         |            | 7.120002 |         |            |
| 17074,   | 213388, | 2853.7417, | 17112,   | 213136, | 2851.3885, | 17150,   | 214388, | 2849.0352, |
| 7.131609 |         |            | 7.125728 |         |            | 7.119847 |         |            |
| 17075,   | 213482, | 2853.6798, | 17113,   | 213716, | 2851.3265, | 17151,   | 214482, | 2848.9733, |
| 7.131454 |         |            | 7.125573 |         |            | 7.119692 |         |            |
| 17076,   | 213190, | 2853.6178, | 17114,   | 213956, | 2851.2646, | 17152,   | 214948, | 2848.9114, |
| 7.131299 |         |            | 7.125418 |         |            | 7.119537 |         |            |
| 17077,   | 212666, | 2853.5559, | 17115,   | 213994, | 2851.2027, | 17153,   | 215442, | 2848.8495, |
| 7.131144 |         |            | 7.125263 |         |            | 7.119383 |         |            |
| 17078,   | 212138, | 2853.4940, | 17116,   | 214118, | 2851.1407, | 17154,   | 215720, | 2848.7875, |
| 7.130989 |         |            | 7.125109 |         |            | 7.119228 |         |            |
| 17079,   | 211882, | 2853.4320, | 17117,   | 214570, | 2851.0788, | 17155,   | 215844, | 2848.7256, |
| 7.130835 |         |            | 7.124954 |         |            | 7.119073 |         |            |
| 17080,   | 212082, | 2853.3701, | 17118,   | 215308, | 2851.0169, | 17156,   | 216024, | 2848.6637, |
| 7.130680 |         |            | 7.124799 |         |            | 7.118918 |         |            |
| 17081,   | 212638, | 2853.3082, | 17119,   | 215924, | 2850.9550, | 17157,   | 216296, | 2848.6017, |
| 7.130525 |         |            | 7.124644 |         |            | 7.118764 |         |            |
| 17082,   | 213270, | 2853.2463, | 17120,   | 215968, | 2850.8930, | 17158,   | 216434, | 2848.5398, |
| 7.130370 |         |            | 7.124490 |         |            | 7.118609 |         |            |
| 17083,   | 213688, | 2853.1843, | 17121,   | 215344, | 2850.8311, | 17159,   | 216236, | 2848.4779, |
| 7.130216 |         |            | 7.124335 |         |            | 7.118454 |         |            |
| 17084,   | 213852, | 2853.1224, | 17122,   | 214438, | 2850.7692, | 17160,   | 215776, | 2848.4160, |
| 7.130061 |         |            | 7.124180 |         |            | 7.118299 |         |            |
| 17085,   | 213910, | 2853.0605, | 17123,   | 213746, | 2850.7073, | 17161,   | 215386, | 2848.3540, |
| 7.129906 |         |            | 7.124025 |         |            | 7.118145 |         |            |
| 17086,   | 213952, | 2852.9986, | 17124,   | 213440, | 2850.6453, | 17162,   | 215336, | 2848.2921, |
| 7.129751 |         |            | 7.123871 |         |            | 7.117990 |         |            |
| 17087,   | 213930, | 2852.9366, | 17125,   | 213248, | 2850.5834, | 17163,   | 215596, | 2848.2302, |
| 7.129597 |         |            | 7.123716 |         |            | 7.117835 |         |            |
| 17088,   | 213766, | 2852.8747, | 17126,   | 212846, | 2850.5215, | 17164,   | 215958, | 2848.1683, |
| 7.129442 |         |            | 7.123561 |         |            | 7.117680 |         |            |
| 17089,   | 213540, | 2852.8128, | 17127,   | 212272, | 2850.4596, | 17165,   | 216260, | 2848.1063, |
| 7.129287 |         |            | 7.123406 |         |            | 7.117526 |         |            |
| 17090,   | 213464, | 2852.7508, | 17128,   | 211928, | 2850.3976, | 17166,   | 216522, | 2848.0444, |
| 7.129132 |         |            | 7.123252 |         |            | 7.117371 |         |            |
| 17091,   | 213670, | 2852.6889, | 17129,   | 212166, | 2850.3357, | 17167,   | 216822, | 2847.9825, |
| 7.128978 |         |            | 7.123097 |         |            | 7.117216 |         |            |
| 17092,   | 214014, | 2852.6270, | 17130,   | 212902, | 2850.2738, | 17168,   | 217086, | 2847.9205, |
| 7.128823 |         |            | 7.122942 |         |            | 7.117061 |         |            |
| 17093,   | 214226, | 2852.5651, | 17131,   | 213690, | 2850.2118, | 17169,   | 217108, | 2847.8586, |
| 7.128668 |         |            | 7.122787 |         |            | 7.116907 |         |            |
| 17094,   | 214186, | 2852.5031, | 17132,   | 214146, | 2850.1499, | 17170,   | 216756, | 2847.7967, |
| 7.128513 |         |            | 7.122633 |         |            | 7.116752 |         |            |
| 17095,   | 214052, | 2852.4412, | 17133,   | 214270, | 2850.0880, | 17171,   | 216148, | 2847.7348, |
| 7.128359 |         |            | 7.122478 |         |            | 7.116597 |         |            |
| 17096,   | 214048, | 2852.3793, | 17134,   | 214316, | 2850.0261, | 17172,   | 215564, | 2847.6728, |
| 7.128204 |         |            | 7.122323 |         |            | 7.116442 |         |            |
| 17097,   | 214138, | 2852.3174, | 17135,   | 214466, | 2849.9641, | 17173,   | 215228, | 2847.6109, |
| 7.128049 |         |            | 7.122168 |         |            | 7.116288 |         |            |
| 17098,   | 214032, | 2852.2554, | 17136,   | 214592, | 2849.9022, | 17174,   | 215156, | 2847.5490, |
| 7.127894 |         |            | 7.122014 |         |            | 7.116133 |         |            |
| 17099,   | 213488, | 2852.1935, | 17137,   | 214472, | 2849.8403, | 17175,   | 215202, | 2847.4871, |
| 7.127740 |         |            | 7.121859 |         |            | 7.115978 |         |            |
| 17100,   | 212666, | 2852.1316, | 17138,   | 214016, | 2849.7784, | 17176,   | 215188, | 2847.4251, |
| 7.127585 |         |            | 7.121704 |         |            | 7.115823 |         |            |
| 17101,   | 212012, | 2852.0697, | 17139,   | 213320, | 2849.7164, | 17177,   | 215014, | 2847.3632, |
| 7.127430 |         |            | 7.121549 |         |            | 7.115668 |         |            |
| 17102,   | 211856, | 2852.0077, | 17140,   | 212520, | 2849.6545, | 17178,   | 214652, | 2847.3013, |
| 7.127275 |         |            | 7.121395 |         |            | 7.115514 |         |            |
| 17103,   | 212028, | 2851.9458, | 17141,   | 211636, | 2849.5926, | 17179,   | 214134, | 2847.2394, |
| 7.127121 |         |            | 7.121240 |         |            | 7.115359 |         |            |
| 17104,   | 212034, | 2851.8839, | 17142,   | 210754, | 2849.5306, | 17180,   | 213638, | 2847.1774, |
| 7.126966 |         |            | 7.121085 |         |            | 7.115204 |         |            |
| 17105,   | 211514, | 2851.8219, | 17143,   | 210156, | 2849.4687, | 17181,   | 213418, | 2847.1155, |
| 7.126811 |         |            | 7.120930 |         |            | 7.115049 |         |            |
| 17106,   | 210604, | 2851.7600, | 17144,   | 210284, | 2849.4068, | 17182,   | 213616, | 2847.0536, |
| 7.126656 |         |            | 7.120775 |         |            | 7.114895 |         |            |
| 17107,   | 209832, | 2851.6981, | 17145,   | 211296, | 2849.3449, | 17183,   | 214074, | 2846.9916, |
| 7.126502 |         |            | 7.120621 |         |            | 7.114740 |         |            |
| 17108,   | 209668, | 2851.6362, | 17146,   | 212834, | 2849.2829, | 17184,   | 214370, | 2846.9297, |
| 7.126347 |         |            | 7.120466 |         |            | 7.114585 |         |            |

|          |         |            |          |         |            |          |         |            |
|----------|---------|------------|----------|---------|------------|----------|---------|------------|
| 17185,   | 214168, | 2846.8678, | 17223,   | 214320, | 2844.5146, | 17261,   | 215640, | 2842.1613, |
| 7.114430 |         |            | 7.108550 |         |            | 7.102669 |         |            |
| 17186,   | 213500, | 2846.8059, | 17224,   | 214644, | 2844.4526, | 17262,   | 215406, | 2842.0994, |
| 7.114276 |         |            | 7.108395 |         |            | 7.102514 |         |            |
| 17187,   | 212784, | 2846.7439, | 17225,   | 214626, | 2844.3907, | 17263,   | 215328, | 2842.0375, |
| 7.114121 |         |            | 7.108240 |         |            | 7.102359 |         |            |
| 17188,   | 212414, | 2846.6820, | 17226,   | 214412, | 2844.3288, | 17264,   | 215596, | 2841.9756, |
| 7.113966 |         |            | 7.108085 |         |            | 7.102205 |         |            |
| 17189,   | 212426, | 2846.6201, | 17227,   | 214144, | 2844.2669, | 17265,   | 216044, | 2841.9136, |
| 7.113811 |         |            | 7.107931 |         |            | 7.102050 |         |            |
| 17190,   | 212536, | 2846.5582, | 17228,   | 213862, | 2844.2049, | 17266,   | 216302, | 2841.8517, |
| 7.113657 |         |            | 7.107776 |         |            | 7.101895 |         |            |
| 17191,   | 212498, | 2846.4962, | 17229,   | 213568, | 2844.1430, | 17267,   | 216098, | 2841.7898, |
| 7.113502 |         |            | 7.107621 |         |            | 7.101740 |         |            |
| 17192,   | 212376, | 2846.4343, | 17230,   | 213362, | 2844.0811, | 17268,   | 215540, | 2841.7279, |
| 7.113347 |         |            | 7.107466 |         |            | 7.101586 |         |            |
| 17193,   | 212440, | 2846.3724, | 17231,   | 213352, | 2844.0192, | 17269,   | 214960, | 2841.6659, |
| 7.113192 |         |            | 7.107312 |         |            | 7.101431 |         |            |
| 17194,   | 212802, | 2846.3104, | 17232,   | 213490, | 2843.9572, | 17270,   | 214594, | 2841.6040, |
| 7.113038 |         |            | 7.107157 |         |            | 7.101276 |         |            |
| 17195,   | 213238, | 2846.2485, | 17233,   | 213552, | 2843.8953, | 17271,   | 214432, | 2841.5421, |
| 7.112883 |         |            | 7.107002 |         |            | 7.101121 |         |            |
| 17196,   | 213394, | 2846.1866, | 17234,   | 213342, | 2843.8334, | 17272,   | 214364, | 2841.4802, |
| 7.112728 |         |            | 7.106847 |         |            | 7.100967 |         |            |
| 17197,   | 213186, | 2846.1247, | 17235,   | 212954, | 2843.7714, | 17273,   | 214422, | 2841.4182, |
| 7.112573 |         |            | 7.106693 |         |            | 7.100812 |         |            |
| 17198,   | 212850, | 2846.0627, | 17236,   | 212748, | 2843.7095, | 17274,   | 214754, | 2841.3563, |
| 7.112419 |         |            | 7.106538 |         |            | 7.100657 |         |            |
| 17199,   | 212684, | 2846.0008, | 17237,   | 213020, | 2843.6476, | 17275,   | 215396, | 2841.2944, |
| 7.112264 |         |            | 7.106383 |         |            | 7.100502 |         |            |
| 17200,   | 212714, | 2845.9389, | 17238,   | 213686, | 2843.5857, | 17276,   | 216102, | 2841.2324, |
| 7.112109 |         |            | 7.106228 |         |            | 7.100347 |         |            |
| 17201,   | 212774, | 2845.8770, | 17239,   | 214348, | 2843.5237, | 17277,   | 216504, | 2841.1705, |
| 7.111954 |         |            | 7.106074 |         |            | 7.100193 |         |            |
| 17202,   | 212786, | 2845.8150, | 17240,   | 214704, | 2843.4618, | 17278,   | 216436, | 2841.1086, |
| 7.111800 |         |            | 7.105919 |         |            | 7.100038 |         |            |
| 17203,   | 212972, | 2845.7531, | 17241,   | 214794, | 2843.3999, | 17279,   | 216100, | 2841.0467, |
| 7.111645 |         |            | 7.105764 |         |            | 7.099883 |         |            |
| 17204,   | 213596, | 2845.6912, | 17242,   | 214892, | 2843.3380, | 17280,   | 215818, | 2840.9847, |
| 7.111490 |         |            | 7.105609 |         |            | 7.099728 |         |            |
| 17205,   | 214588, | 2845.6293, | 17243,   | 215130, | 2843.2760, | 17281,   | 215756, | 2840.9228, |
| 7.111335 |         |            | 7.105454 |         |            | 7.099574 |         |            |
| 17206,   | 215468, | 2845.5673, | 17244,   | 215322, | 2843.2141, | 17282,   | 215804, | 2840.8609, |
| 7.111181 |         |            | 7.105300 |         |            | 7.099419 |         |            |
| 17207,   | 215742, | 2845.5054, | 17245,   | 215184, | 2843.1522, | 17283,   | 215804, | 2840.7990, |
| 7.111026 |         |            | 7.105145 |         |            | 7.099264 |         |            |
| 17208,   | 215402, | 2845.4435, | 17246,   | 214692, | 2843.0903, | 17284,   | 215776, | 2840.7370, |
| 7.110871 |         |            | 7.104990 |         |            | 7.099109 |         |            |
| 17209,   | 214948, | 2845.3815, | 17247,   | 214184, | 2843.0283, | 17285,   | 215878, | 2840.6751, |
| 7.110716 |         |            | 7.104835 |         |            | 7.098955 |         |            |
| 17210,   | 214880, | 2845.3196, | 17248,   | 214082, | 2842.9664, | 17286,   | 216172, | 2840.6132, |
| 7.110561 |         |            | 7.104681 |         |            | 7.098800 |         |            |
| 17211,   | 215210, | 2845.2577, | 17249,   | 214528, | 2842.9045, | 17287,   | 216488, | 2840.5512, |
| 7.110407 |         |            | 7.104526 |         |            | 7.098645 |         |            |
| 17212,   | 215454, | 2845.1958, | 17250,   | 215288, | 2842.8425, | 17288,   | 216590, | 2840.4893, |
| 7.110252 |         |            | 7.104371 |         |            | 7.098490 |         |            |
| 17213,   | 215158, | 2845.1338, | 17251,   | 216006, | 2842.7806, | 17289,   | 216422, | 2840.4274, |
| 7.110097 |         |            | 7.104216 |         |            | 7.098336 |         |            |
| 17214,   | 214358, | 2845.0719, | 17252,   | 216486, | 2842.7187, | 17290,   | 216152, | 2840.3655, |
| 7.109942 |         |            | 7.104062 |         |            | 7.098181 |         |            |
| 17215,   | 213494, | 2845.0100, | 17253,   | 216706, | 2842.6568, | 17291,   | 215974, | 2840.3035, |
| 7.109788 |         |            | 7.103907 |         |            | 7.098026 |         |            |
| 17216,   | 212986, | 2844.9481, | 17254,   | 216712, | 2842.5948, | 17292,   | 215926, | 2840.2416, |
| 7.109633 |         |            | 7.103752 |         |            | 7.097871 |         |            |
| 17217,   | 212860, | 2844.8861, | 17255,   | 216514, | 2842.5329, | 17293,   | 215938, | 2840.1797, |
| 7.109478 |         |            | 7.103597 |         |            | 7.097717 |         |            |
| 17218,   | 212850, | 2844.8242, | 17256,   | 216170, | 2842.4710, | 17294,   | 216040, | 2840.1178, |
| 7.109323 |         |            | 7.103443 |         |            | 7.097562 |         |            |
| 17219,   | 212798, | 2844.7623, | 17257,   | 215834, | 2842.4091, | 17295,   | 216376, | 2840.0558, |
| 7.109169 |         |            | 7.103288 |         |            | 7.097407 |         |            |
| 17220,   | 212822, | 2844.7004, | 17258,   | 215682, | 2842.3471, | 17296,   | 217012, | 2839.9939, |
| 7.109014 |         |            | 7.103133 |         |            | 7.097252 |         |            |
| 17221,   | 213130, | 2844.6384, | 17259,   | 215726, | 2842.2852, | 17297,   | 217686, | 2839.9320, |
| 7.108859 |         |            | 7.102978 |         |            | 7.097098 |         |            |
| 17222,   | 213718, | 2844.5765, | 17260,   | 215770, | 2842.2233, | 17298,   | 217992, | 2839.8701, |
| 7.108704 |         |            | 7.102824 |         |            | 7.096943 |         |            |

|          |         |            |          |         |            |          |         |            |
|----------|---------|------------|----------|---------|------------|----------|---------|------------|
| 17299,   | 217762, | 2839.8081, | 17337,   | 218708, | 2837.4549, | 17375,   | 216878, | 2835.1017, |
| 7.096788 |         |            | 7.090907 |         |            | 7.085026 |         |            |
| 17300,   | 217320, | 2839.7462, | 17338,   | 218316, | 2837.3930, | 17376,   | 216956, | 2835.0398, |
| 7.096633 |         |            | 7.090752 |         |            | 7.084872 |         |            |
| 17301,   | 217234, | 2839.6843, | 17339,   | 217618, | 2837.3310, | 17377,   | 216788, | 2834.9778, |
| 7.096479 |         |            | 7.090598 |         |            | 7.084717 |         |            |
| 17302,   | 217768, | 2839.6223, | 17340,   | 217130, | 2837.2691, | 17378,   | 216700, | 2834.9159, |
| 7.096324 |         |            | 7.090443 |         |            | 7.084562 |         |            |
| 17303,   | 218606, | 2839.5604, | 17341,   | 217084, | 2837.2072, | 17379,   | 216846, | 2834.8540, |
| 7.096169 |         |            | 7.090288 |         |            | 7.084407 |         |            |
| 17304,   | 219154, | 2839.4985, | 17342,   | 217276, | 2837.1453, | 17380,   | 217114, | 2834.7920, |
| 7.096014 |         |            | 7.090133 |         |            | 7.084253 |         |            |
| 17305,   | 219082, | 2839.4366, | 17343,   | 217430, | 2837.0833, | 17381,   | 217296, | 2834.7301, |
| 7.095860 |         |            | 7.089979 |         |            | 7.084098 |         |            |
| 17306,   | 218578, | 2839.3746, | 17344,   | 217500, | 2837.0214, | 17382,   | 217280, | 2834.6682, |
| 7.095705 |         |            | 7.089824 |         |            | 7.083943 |         |            |
| 17307,   | 218038, | 2839.3127, | 17345,   | 217634, | 2836.9595, | 17383,   | 217108, | 2834.6063, |
| 7.095550 |         |            | 7.089669 |         |            | 7.083788 |         |            |
| 17308,   | 217634, | 2839.2508, | 17346,   | 217842, | 2836.8976, | 17384,   | 216852, | 2834.5443, |
| 7.095395 |         |            | 7.089514 |         |            | 7.083634 |         |            |
| 17309,   | 217214, | 2839.1889, | 17347,   | 217862, | 2836.8356, | 17385,   | 216612, | 2834.4824, |
| 7.095240 |         |            | 7.089360 |         |            | 7.083479 |         |            |
| 17310,   | 216662, | 2839.1269, | 17348,   | 217432, | 2836.7737, | 17386,   | 216540, | 2834.4205, |
| 7.095086 |         |            | 7.089205 |         |            | 7.083324 |         |            |
| 17311,   | 216134, | 2839.0650, | 17349,   | 216620, | 2836.7118, | 17387,   | 216834, | 2834.3586, |
| 7.094931 |         |            | 7.089050 |         |            | 7.083169 |         |            |
| 17312,   | 215932, | 2839.0031, | 17350,   | 215840, | 2836.6499, | 17388,   | 217522, | 2834.2966, |
| 7.094776 |         |            | 7.088895 |         |            | 7.083015 |         |            |
| 17313,   | 216082, | 2838.9411, | 17351,   | 215440, | 2836.5879, | 17389,   | 218314, | 2834.2347, |
| 7.094621 |         |            | 7.088741 |         |            | 7.082860 |         |            |
| 17314,   | 216220, | 2838.8792, | 17352,   | 215390, | 2836.5260, | 17390,   | 218732, | 2834.1728, |
| 7.094467 |         |            | 7.088586 |         |            | 7.082705 |         |            |
| 17315,   | 215968, | 2838.8173, | 17353,   | 215394, | 2836.4641, | 17391,   | 218492, | 2834.1108, |
| 7.094312 |         |            | 7.088431 |         |            | 7.082550 |         |            |
| 17316,   | 215404, | 2838.7554, | 17354,   | 215290, | 2836.4021, | 17392,   | 217760, | 2834.0489, |
| 7.094157 |         |            | 7.088276 |         |            | 7.082396 |         |            |
| 17317,   | 215056, | 2838.6934, | 17355,   | 215302, | 2836.3402, | 17393,   | 216998, | 2833.9870, |
| 7.094002 |         |            | 7.088122 |         |            | 7.082241 |         |            |
| 17318,   | 215338, | 2838.6315, | 17356,   | 215758, | 2836.2783, | 17394,   | 216490, | 2833.9251, |
| 7.093848 |         |            | 7.087967 |         |            | 7.082086 |         |            |
| 17319,   | 216082, | 2838.5696, | 17357,   | 216670, | 2836.2164, | 17395,   | 216128, | 2833.8631, |
| 7.093693 |         |            | 7.087812 |         |            | 7.081931 |         |            |
| 17320,   | 216656, | 2838.5077, | 17358,   | 217602, | 2836.1544, | 17396,   | 215624, | 2833.8012, |
| 7.093538 |         |            | 7.087657 |         |            | 7.081777 |         |            |
| 17321,   | 216646, | 2838.4457, | 17359,   | 218074, | 2836.0925, | 17397,   | 214938, | 2833.7393, |
| 7.093383 |         |            | 7.087503 |         |            | 7.081622 |         |            |
| 17322,   | 216284, | 2838.3838, | 17360,   | 217994, | 2836.0306, | 17398,   | 214408, | 2833.6774, |
| 7.093229 |         |            | 7.087348 |         |            | 7.081467 |         |            |
| 17323,   | 216198, | 2838.3219, | 17361,   | 217684, | 2835.9687, | 17399,   | 214382, | 2833.6154, |
| 7.093074 |         |            | 7.087193 |         |            | 7.081312 |         |            |
| 17324,   | 216684, | 2838.2600, | 17362,   | 217526, | 2835.9067, | 17400,   | 214796, | 2833.5535, |
| 7.092919 |         |            | 7.087038 |         |            | 7.081158 |         |            |
| 17325,   | 217328, | 2838.1980, | 17363,   | 217586, | 2835.8448, | 17401,   | 215220, | 2833.4916, |
| 7.092764 |         |            | 7.086884 |         |            | 7.081003 |         |            |
| 17326,   | 217430, | 2838.1361, | 17364,   | 217628, | 2835.7829, | 17402,   | 215328, | 2833.4297, |
| 7.092610 |         |            | 7.086729 |         |            | 7.080848 |         |            |
| 17327,   | 216724, | 2838.0742, | 17365,   | 217474, | 2835.7209, | 17403,   | 215320, | 2833.3677, |
| 7.092455 |         |            | 7.086574 |         |            | 7.080693 |         |            |
| 17328,   | 215688, | 2838.0122, | 17366,   | 217188, | 2835.6590, | 17404,   | 215678, | 2833.3058, |
| 7.092300 |         |            | 7.086419 |         |            | 7.080538 |         |            |
| 17329,   | 215066, | 2837.9503, | 17367,   | 216938, | 2835.5971, | 17405,   | 216600, | 2833.2439, |
| 7.092145 |         |            | 7.086265 |         |            | 7.080384 |         |            |
| 17330,   | 215154, | 2837.8884, | 17368,   | 216732, | 2835.5352, | 17406,   | 217648, | 2833.1819, |
| 7.091991 |         |            | 7.086110 |         |            | 7.080229 |         |            |
| 17331,   | 215664, | 2837.8265, | 17369,   | 216416, | 2835.4732, | 17407,   | 218130, | 2833.1200, |
| 7.091836 |         |            | 7.085955 |         |            | 7.080074 |         |            |
| 17332,   | 216134, | 2837.7645, | 17370,   | 215904, | 2835.4113, | 17408,   | 217782, | 2833.0581, |
| 7.091681 |         |            | 7.085800 |         |            | 7.079919 |         |            |
| 17333,   | 216474, | 2837.7026, | 17371,   | 215416, | 2835.3494, | 17409,   | 217028, | 2832.9962, |
| 7.091526 |         |            | 7.085645 |         |            | 7.079765 |         |            |
| 17334,   | 216940, | 2837.6407, | 17372,   | 215308, | 2835.2875, | 17410,   | 216522, | 2832.9342, |
| 7.091372 |         |            | 7.085491 |         |            | 7.079610 |         |            |
| 17335,   | 217692, | 2837.5788, | 17373,   | 215726, | 2835.2255, | 17411,   | 216468, | 2832.8723, |
| 7.091217 |         |            | 7.085336 |         |            | 7.079455 |         |            |
| 17336,   | 218444, | 2837.5168, | 17374,   | 216396, | 2835.1636, | 17412,   | 216480, | 2832.8104, |
| 7.091062 |         |            | 7.085181 |         |            | 7.079300 |         |            |

|          |         |            |          |         |            |          |         |            |
|----------|---------|------------|----------|---------|------------|----------|---------|------------|
| 17413,   | 216090, | 2832.7485, | 17451,   | 215454, | 2830.3952, | 17489,   | 220192, | 2828.0420, |
| 7.079146 |         |            | 7.073265 |         |            | 7.067384 |         |            |
| 17414,   | 215366, | 2832.6865, | 17452,   | 214740, | 2830.3333, | 17490,   | 219788, | 2827.9801, |
| 7.078991 |         |            | 7.073110 |         |            | 7.067229 |         |            |
| 17415,   | 214856, | 2832.6246, | 17453,   | 214182, | 2830.2714, | 17491,   | 218956, | 2827.9182, |
| 7.078836 |         |            | 7.072955 |         |            | 7.067075 |         |            |
| 17416,   | 215008, | 2832.5627, | 17454,   | 214250, | 2830.2095, | 17492,   | 218136, | 2827.8562, |
| 7.078681 |         |            | 7.072801 |         |            | 7.066920 |         |            |
| 17417,   | 215648, | 2832.5007, | 17455,   | 214848, | 2830.1475, | 17493,   | 217648, | 2827.7943, |
| 7.078527 |         |            | 7.072646 |         |            | 7.066765 |         |            |
| 17418,   | 216166, | 2832.4388, | 17456,   | 215470, | 2830.0856, | 17494,   | 217478, | 2827.7324, |
| 7.078372 |         |            | 7.072491 |         |            | 7.066610 |         |            |
| 17419,   | 216138, | 2832.3769, | 17457,   | 215752, | 2830.0237, | 17495,   | 217458, | 2827.6705, |
| 7.078217 |         |            | 7.072336 |         |            | 7.066456 |         |            |
| 17420,   | 215700, | 2832.3150, | 17458,   | 215824, | 2829.9617, | 17496,   | 217568, | 2827.6085, |
| 7.078062 |         |            | 7.072182 |         |            | 7.066301 |         |            |
| 17421,   | 215270, | 2832.2530, | 17459,   | 216112, | 2829.8998, | 17497,   | 217924, | 2827.5466, |
| 7.077908 |         |            | 7.072027 |         |            | 7.066146 |         |            |
| 17422,   | 215018, | 2832.1911, | 17460,   | 216852, | 2829.8379, | 17498,   | 218590, | 2827.4847, |
| 7.077753 |         |            | 7.071872 |         |            | 7.065991 |         |            |
| 17423,   | 214692, | 2832.1292, | 17461,   | 217850, | 2829.7760, | 17499,   | 219392, | 2827.4227, |
| 7.077598 |         |            | 7.071717 |         |            | 7.065837 |         |            |
| 17424,   | 214006, | 2832.0673, | 17462,   | 218732, | 2829.7140, | 17500,   | 220036, | 2827.3608, |
| 7.077443 |         |            | 7.071563 |         |            | 7.065682 |         |            |
| 17425,   | 213106, | 2832.0053, | 17463,   | 219328, | 2829.6521, | 17501,   | 220372, | 2827.2989, |
| 7.077289 |         |            | 7.071408 |         |            | 7.065527 |         |            |
| 17426,   | 212486, | 2831.9434, | 17464,   | 219776, | 2829.5902, | 17502,   | 220460, | 2827.2370, |
| 7.077134 |         |            | 7.071253 |         |            | 7.065372 |         |            |
| 17427,   | 212498, | 2831.8815, | 17465,   | 220276, | 2829.5283, | 17503,   | 220416, | 2827.1750, |
| 7.076979 |         |            | 7.071098 |         |            | 7.065217 |         |            |
| 17428,   | 212934, | 2831.8196, | 17466,   | 220844, | 2829.4663, | 17504,   | 220208, | 2827.1131, |
| 7.076824 |         |            | 7.070944 |         |            | 7.065063 |         |            |
| 17429,   | 213260, | 2831.7576, | 17467,   | 221354, | 2829.4044, | 17505,   | 219676, | 2827.0512, |
| 7.076670 |         |            | 7.070789 |         |            | 7.064908 |         |            |
| 17430,   | 213190, | 2831.6957, | 17468,   | 221748, | 2829.3425, | 17506,   | 218734, | 2826.9893, |
| 7.076515 |         |            | 7.070634 |         |            | 7.064753 |         |            |
| 17431,   | 212960, | 2831.6338, | 17469,   | 222092, | 2829.2806, | 17507,   | 217542, | 2826.9273, |
| 7.076360 |         |            | 7.070479 |         |            | 7.064598 |         |            |
| 17432,   | 213040, | 2831.5718, | 17470,   | 222416, | 2829.2186, | 17508,   | 216450, | 2826.8654, |
| 7.076205 |         |            | 7.070324 |         |            | 7.064444 |         |            |
| 17433,   | 213562, | 2831.5099, | 17471,   | 222556, | 2829.1567, | 17509,   | 215756, | 2826.8035, |
| 7.076051 |         |            | 7.070170 |         |            | 7.064289 |         |            |
| 17434,   | 214172, | 2831.4480, | 17472,   | 222310, | 2829.0948, | 17510,   | 215594, | 2826.7415, |
| 7.075896 |         |            | 7.070015 |         |            | 7.064134 |         |            |
| 17435,   | 214416, | 2831.3861, | 17473,   | 221740, | 2829.0328, | 17511,   | 215890, | 2826.6796, |
| 7.075741 |         |            | 7.069860 |         |            | 7.063979 |         |            |
| 17436,   | 214234, | 2831.3241, | 17474,   | 221266, | 2828.9709, | 17512,   | 216474, | 2826.6177, |
| 7.075586 |         |            | 7.069705 |         |            | 7.063825 |         |            |
| 17437,   | 213966, | 2831.2622, | 17475,   | 221268, | 2828.9090, | 17513,   | 217158, | 2826.5558, |
| 7.075431 |         |            | 7.069551 |         |            | 7.063670 |         |            |
| 17438,   | 214018, | 2831.2003, | 17476,   | 221660, | 2828.8471, | 17514,   | 217728, | 2826.4938, |
| 7.075277 |         |            | 7.069396 |         |            | 7.063515 |         |            |
| 17439,   | 214432, | 2831.1384, | 17477,   | 221888, | 2828.7851, | 17515,   | 218034, | 2826.4319, |
| 7.075122 |         |            | 7.069241 |         |            | 7.063360 |         |            |
| 17440,   | 214956, | 2831.0764, | 17478,   | 221462, | 2828.7232, | 17516,   | 218060, | 2826.3700, |
| 7.074967 |         |            | 7.069086 |         |            | 7.063206 |         |            |
| 17441,   | 215354, | 2831.0145, | 17479,   | 220508, | 2828.6613, | 17517,   | 217932, | 2826.3081, |
| 7.074812 |         |            | 7.068932 |         |            | 7.063051 |         |            |
| 17442,   | 215586, | 2830.9526, | 17480,   | 219698, | 2828.5994, | 17518,   | 217808, | 2826.2461, |
| 7.074658 |         |            | 7.068777 |         |            | 7.062896 |         |            |
| 17443,   | 215700, | 2830.8907, | 17481,   | 219622, | 2828.5374, | 17519,   | 217720, | 2826.1842, |
| 7.074503 |         |            | 7.068622 |         |            | 7.062741 |         |            |
| 17444,   | 215658, | 2830.8287, | 17482,   | 220196, | 2828.4755, | 17520,   | 217608, | 2826.1223, |
| 7.074348 |         |            | 7.068467 |         |            | 7.062587 |         |            |
| 17445,   | 215376, | 2830.7668, | 17483,   | 220756, | 2828.4136, | 17521,   | 217458, | 2826.0604, |
| 7.074193 |         |            | 7.068313 |         |            | 7.062432 |         |            |
| 17446,   | 214950, | 2830.7049, | 17484,   | 220734, | 2828.3516, | 17522,   | 217404, | 2825.9984, |
| 7.074039 |         |            | 7.068158 |         |            | 7.062277 |         |            |
| 17447,   | 214714, | 2830.6429, | 17485,   | 220196, | 2828.2897, | 17523,   | 217610, | 2825.9365, |
| 7.073884 |         |            | 7.068003 |         |            | 7.062122 |         |            |
| 17448,   | 214922, | 2830.5810, | 17486,   | 219704, | 2828.2278, | 17524,   | 218058, | 2825.8746, |
| 7.073729 |         |            | 7.067848 |         |            | 7.061968 |         |            |
| 17449,   | 215432, | 2830.5191, | 17487,   | 219694, | 2828.1659, | 17525,   | 218462, | 2825.8126, |
| 7.073574 |         |            | 7.067694 |         |            | 7.061813 |         |            |
| 17450,   | 215738, | 2830.4572, | 17488,   | 220038, | 2828.1039, | 17526,   | 218490, | 2825.7507, |
| 7.073420 |         |            | 7.067539 |         |            | 7.061658 |         |            |

|          |         |            |          |         |            |          |         |            |
|----------|---------|------------|----------|---------|------------|----------|---------|------------|
| 17527,   | 218080, | 2825.6888, | 17565,   | 219374, | 2823.3356, | 17603,   | 219516, | 2820.9823, |
| 7.061503 |         |            | 7.055623 |         |            | 7.049742 |         |            |
| 17528,   | 217516, | 2825.6269, | 17566,   | 219298, | 2823.2736, | 17604,   | 220148, | 2820.9204, |
| 7.061349 |         |            | 7.055468 |         |            | 7.049587 |         |            |
| 17529,   | 217162, | 2825.5649, | 17567,   | 219690, | 2823.2117, | 17605,   | 220588, | 2820.8585, |
| 7.061194 |         |            | 7.055313 |         |            | 7.049432 |         |            |
| 17530,   | 217152, | 2825.5030, | 17568,   | 220350, | 2823.1498, | 17606,   | 220926, | 2820.7966, |
| 7.061039 |         |            | 7.055158 |         |            | 7.049277 |         |            |
| 17531,   | 217334, | 2825.4411, | 17569,   | 220766, | 2823.0879, | 17607,   | 221120, | 2820.7346, |
| 7.060884 |         |            | 7.055003 |         |            | 7.049123 |         |            |
| 17532,   | 217494, | 2825.3792, | 17570,   | 220634, | 2823.0259, | 17608,   | 221054, | 2820.6727, |
| 7.060730 |         |            | 7.054849 |         |            | 7.048968 |         |            |
| 17533,   | 217588, | 2825.3172, | 17571,   | 220194, | 2822.9640, | 17609,   | 220692, | 2820.6108, |
| 7.060575 |         |            | 7.054694 |         |            | 7.048813 |         |            |
| 17534,   | 217700, | 2825.2553, | 17572,   | 220020, | 2822.9021, | 17610,   | 220152, | 2820.5489, |
| 7.060420 |         |            | 7.054539 |         |            | 7.048658 |         |            |
| 17535,   | 217830, | 2825.1934, | 17573,   | 220420, | 2822.8402, | 17611,   | 219538, | 2820.4869, |
| 7.060265 |         |            | 7.054384 |         |            | 7.048504 |         |            |
| 17536,   | 217804, | 2825.1314, | 17574,   | 221118, | 2822.7782, | 17612,   | 218870, | 2820.4250, |
| 7.060110 |         |            | 7.054230 |         |            | 7.048349 |         |            |
| 17537,   | 217478, | 2825.0695, | 17575,   | 221534, | 2822.7163, | 17613,   | 218142, | 2820.3631, |
| 7.059956 |         |            | 7.054075 |         |            | 7.048194 |         |            |
| 17538,   | 216994, | 2825.0076, | 17576,   | 221388, | 2822.6544, | 17614,   | 217480, | 2820.3011, |
| 7.059801 |         |            | 7.053920 |         |            | 7.048039 |         |            |
| 17539,   | 216736, | 2824.9457, | 17577,   | 220978, | 2822.5924, | 17615,   | 217142, | 2820.2392, |
| 7.059646 |         |            | 7.053765 |         |            | 7.047885 |         |            |
| 17540,   | 216948, | 2824.8837, | 17578,   | 220756, | 2822.5305, | 17616,   | 217268, | 2820.1773, |
| 7.059491 |         |            | 7.053611 |         |            | 7.047730 |         |            |
| 17541,   | 217488, | 2824.8218, | 17579,   | 220778, | 2822.4686, | 17617,   | 217688, | 2820.1154, |
| 7.059337 |         |            | 7.053456 |         |            | 7.047575 |         |            |
| 17542,   | 217956, | 2824.7599, | 17580,   | 220594, | 2822.4067, | 17618,   | 218012, | 2820.0534, |
| 7.059182 |         |            | 7.053301 |         |            | 7.047420 |         |            |
| 17543,   | 218140, | 2824.6980, | 17581,   | 219738, | 2822.3447, | 17619,   | 217972, | 2819.9915, |
| 7.059027 |         |            | 7.053146 |         |            | 7.047266 |         |            |
| 17544,   | 218270, | 2824.6360, | 17582,   | 218262, | 2822.2828, | 17620,   | 217670, | 2819.9296, |
| 7.058872 |         |            | 7.052992 |         |            | 7.047111 |         |            |
| 17545,   | 218720, | 2824.5741, | 17583,   | 216742, | 2822.2209, | 17621,   | 217468, | 2819.8677, |
| 7.058718 |         |            | 7.052837 |         |            | 7.046956 |         |            |
| 17546,   | 219548, | 2824.5122, | 17584,   | 215778, | 2822.1590, | 17622,   | 217624, | 2819.8057, |
| 7.058563 |         |            | 7.052682 |         |            | 7.046801 |         |            |
| 17547,   | 220300, | 2824.4503, | 17585,   | 215462, | 2822.0970, | 17623,   | 218092, | 2819.7438, |
| 7.058408 |         |            | 7.052527 |         |            | 7.046647 |         |            |
| 17548,   | 220398, | 2824.3883, | 17586,   | 215476, | 2822.0351, | 17624,   | 218660, | 2819.6819, |
| 7.058253 |         |            | 7.052373 |         |            | 7.046492 |         |            |
| 17549,   | 219722, | 2824.3264, | 17587,   | 215500, | 2821.9732, | 17625,   | 219222, | 2819.6200, |
| 7.058099 |         |            | 7.052218 |         |            | 7.046337 |         |            |
| 17550,   | 218754, | 2824.2645, | 17588,   | 215570, | 2821.9112, | 17626,   | 219862, | 2819.5580, |
| 7.057944 |         |            | 7.052063 |         |            | 7.046182 |         |            |
| 17551,   | 218186, | 2824.2025, | 17589,   | 215878, | 2821.8493, | 17627,   | 220662, | 2819.4961, |
| 7.057789 |         |            | 7.051908 |         |            | 7.046028 |         |            |
| 17552,   | 218344, | 2824.1406, | 17590,   | 216432, | 2821.7874, | 17628,   | 221488, | 2819.4342, |
| 7.057634 |         |            | 7.051754 |         |            | 7.045873 |         |            |
| 17553,   | 219026, | 2824.0787, | 17591,   | 216926, | 2821.7255, | 17629,   | 222050, | 2819.3722, |
| 7.057480 |         |            | 7.051599 |         |            | 7.045718 |         |            |
| 17554,   | 219806, | 2824.0168, | 17592,   | 217044, | 2821.6635, | 17630,   | 222164, | 2819.3103, |
| 7.057325 |         |            | 7.051444 |         |            | 7.045563 |         |            |
| 17555,   | 220404, | 2823.9548, | 17593,   | 216816, | 2821.6016, | 17631,   | 221938, | 2819.2484, |
| 7.057170 |         |            | 7.051289 |         |            | 7.045408 |         |            |
| 17556,   | 220804, | 2823.8929, | 17594,   | 216576, | 2821.5397, | 17632,   | 221628, | 2819.1865, |
| 7.057015 |         |            | 7.051135 |         |            | 7.045254 |         |            |
| 17557,   | 221044, | 2823.8310, | 17595,   | 216604, | 2821.4778, | 17633,   | 221340, | 2819.1245, |
| 7.056861 |         |            | 7.050980 |         |            | 7.045099 |         |            |
| 17558,   | 221060, | 2823.7691, | 17596,   | 216822, | 2821.4158, | 17634,   | 220954, | 2819.0626, |
| 7.056706 |         |            | 7.050825 |         |            | 7.044944 |         |            |
| 17559,   | 220810, | 2823.7071, | 17597,   | 216940, | 2821.3539, | 17635,   | 220316, | 2819.0007, |
| 7.056551 |         |            | 7.050670 |         |            | 7.044789 |         |            |
| 17560,   | 220414, | 2823.6452, | 17598,   | 216822, | 2821.2920, | 17636,   | 219528, | 2818.9388, |
| 7.056396 |         |            | 7.050516 |         |            | 7.044635 |         |            |
| 17561,   | 220104, | 2823.5833, | 17599,   | 216698, | 2821.2301, | 17637,   | 218914, | 2818.8768, |
| 7.056242 |         |            | 7.050361 |         |            | 7.044480 |         |            |
| 17562,   | 219978, | 2823.5213, | 17600,   | 216932, | 2821.1681, | 17638,   | 218754, | 2818.8149, |
| 7.056087 |         |            | 7.050206 |         |            | 7.044325 |         |            |
| 17563,   | 219902, | 2823.4594, | 17601,   | 217652, | 2821.1062, | 17639,   | 218972, | 2818.7530, |
| 7.055932 |         |            | 7.050051 |         |            | 7.044170 |         |            |
| 17564,   | 219682, | 2823.3975, | 17602,   | 218628, | 2821.0443, | 17640,   | 219200, | 2818.6911, |
| 7.055777 |         |            | 7.049896 |         |            | 7.044016 |         |            |

|          |         |            |          |         |            |          |         |            |
|----------|---------|------------|----------|---------|------------|----------|---------|------------|
| 17641,   | 219106, | 2818.6291, | 17679,   | 219060, | 2816.2759, | 17717,   | 220780, | 2813.9227, |
| 7.043861 |         |            | 7.037980 |         |            | 7.032099 |         |            |
| 17642,   | 218670, | 2818.5672, | 17680,   | 218722, | 2816.2140, | 17718,   | 220452, | 2813.8608, |
| 7.043706 |         |            | 7.037825 |         |            | 7.031945 |         |            |
| 17643,   | 218138, | 2818.5053, | 17681,   | 218714, | 2816.1520, | 17719,   | 220746, | 2813.7988, |
| 7.043551 |         |            | 7.037671 |         |            | 7.031790 |         |            |
| 17644,   | 217820, | 2818.4433, | 17682,   | 219162, | 2816.0901, | 17720,   | 221530, | 2813.7369, |
| 7.043397 |         |            | 7.037516 |         |            | 7.031635 |         |            |
| 17645,   | 217846, | 2818.3814, | 17683,   | 219912, | 2816.0282, | 17721,   | 222308, | 2813.6750, |
| 7.043242 |         |            | 7.037361 |         |            | 7.031480 |         |            |
| 17646,   | 218214, | 2818.3195, | 17684,   | 220772, | 2815.9663, | 17722,   | 222732, | 2813.6130, |
| 7.043087 |         |            | 7.037206 |         |            | 7.031326 |         |            |
| 17647,   | 218834, | 2818.2576, | 17685,   | 221674, | 2815.9043, | 17723,   | 222898, | 2813.5511, |
| 7.042932 |         |            | 7.037052 |         |            | 7.031171 |         |            |
| 17648,   | 219584, | 2818.1956, | 17686,   | 222636, | 2815.8424, | 17724,   | 223120, | 2813.4892, |
| 7.042778 |         |            | 7.036897 |         |            | 7.031016 |         |            |
| 17649,   | 220260, | 2818.1337, | 17687,   | 223594, | 2815.7805, | 17725,   | 223446, | 2813.4273, |
| 7.042623 |         |            | 7.036742 |         |            | 7.030861 |         |            |
| 17650,   | 220626, | 2818.0718, | 17688,   | 224352, | 2815.7186, | 17726,   | 223546, | 2813.3653, |
| 7.042468 |         |            | 7.036587 |         |            | 7.030707 |         |            |
| 17651,   | 220574, | 2818.0099, | 17689,   | 224764, | 2815.6566, | 17727,   | 223098, | 2813.3034, |
| 7.042313 |         |            | 7.036433 |         |            | 7.030552 |         |            |
| 17652,   | 220222, | 2817.9479, | 17690,   | 224886, | 2815.5947, | 17728,   | 222232, | 2813.2415, |
| 7.042159 |         |            | 7.036278 |         |            | 7.030397 |         |            |
| 17653,   | 219842, | 2817.8860, | 17691,   | 224900, | 2815.5328, | 17729,   | 221488, | 2813.1796, |
| 7.042004 |         |            | 7.036123 |         |            | 7.030242 |         |            |
| 17654,   | 219632, | 2817.8241, | 17692,   | 224868, | 2815.4709, | 17730,   | 221282, | 2813.1176, |
| 7.041849 |         |            | 7.035968 |         |            | 7.030087 |         |            |
| 17655,   | 219610, | 2817.7621, | 17693,   | 224642, | 2815.4089, | 17731,   | 221482, | 2813.0557, |
| 7.041694 |         |            | 7.035814 |         |            | 7.029933 |         |            |
| 17656,   | 219674, | 2817.7002, | 17694,   | 224042, | 2815.3470, | 17732,   | 221538, | 2812.9938, |
| 7.041540 |         |            | 7.035659 |         |            | 7.029778 |         |            |
| 17657,   | 219810, | 2817.6383, | 17695,   | 223104, | 2815.2851, | 17733,   | 221056, | 2812.9318, |
| 7.041385 |         |            | 7.035504 |         |            | 7.029623 |         |            |
| 17658,   | 220084, | 2817.5764, | 17696,   | 222122, | 2815.2231, | 17734,   | 220200, | 2812.8699, |
| 7.041230 |         |            | 7.035349 |         |            | 7.029468 |         |            |
| 17659,   | 220478, | 2817.5144, | 17697,   | 221388, | 2815.1612, | 17735,   | 219556, | 2812.8080, |
| 7.041075 |         |            | 7.035194 |         |            | 7.029314 |         |            |
| 17660,   | 220814, | 2817.4525, | 17698,   | 220942, | 2815.0993, | 17736,   | 219564, | 2812.7461, |
| 7.040921 |         |            | 7.035040 |         |            | 7.029159 |         |            |
| 17661,   | 220850, | 2817.3906, | 17699,   | 220642, | 2815.0374, | 17737,   | 220168, | 2812.6841, |
| 7.040766 |         |            | 7.034885 |         |            | 7.029004 |         |            |
| 17662,   | 220596, | 2817.3287, | 17700,   | 220406, | 2814.9754, | 17738,   | 220926, | 2812.6222, |
| 7.040611 |         |            | 7.034730 |         |            | 7.028849 |         |            |
| 17663,   | 220338, | 2817.2667, | 17701,   | 220316, | 2814.9135, | 17739,   | 221426, | 2812.5603, |
| 7.040456 |         |            | 7.034575 |         |            | 7.028695 |         |            |
| 17664,   | 220408, | 2817.2048, | 17702,   | 220456, | 2814.8516, | 17740,   | 221520, | 2812.4984, |
| 7.040301 |         |            | 7.034421 |         |            | 7.028540 |         |            |
| 17665,   | 220790, | 2817.1429, | 17703,   | 220668, | 2814.7897, | 17741,   | 221284, | 2812.4364, |
| 7.040147 |         |            | 7.034266 |         |            | 7.028385 |         |            |
| 17666,   | 221104, | 2817.0810, | 17704,   | 220630, | 2814.7277, | 17742,   | 220824, | 2812.3745, |
| 7.039992 |         |            | 7.034111 |         |            | 7.028230 |         |            |
| 17667,   | 220970, | 2817.0190, | 17705,   | 220188, | 2814.6658, | 17743,   | 220264, | 2812.3126, |
| 7.039837 |         |            | 7.033956 |         |            | 7.028076 |         |            |
| 17668,   | 220414, | 2816.9571, | 17706,   | 219650, | 2814.6039, | 17744,   | 219790, | 2812.2507, |
| 7.039682 |         |            | 7.033802 |         |            | 7.027921 |         |            |
| 17669,   | 219890, | 2816.8952, | 17707,   | 219546, | 2814.5419, | 17745,   | 219658, | 2812.1887, |
| 7.039528 |         |            | 7.033647 |         |            | 7.027766 |         |            |
| 17670,   | 219820, | 2816.8332, | 17708,   | 220124, | 2814.4800, | 17746,   | 220018, | 2812.1268, |
| 7.039373 |         |            | 7.033492 |         |            | 7.027611 |         |            |
| 17671,   | 220184, | 2816.7713, | 17709,   | 221054, | 2814.4181, | 17747,   | 220780, | 2812.0649, |
| 7.039218 |         |            | 7.033337 |         |            | 7.027457 |         |            |
| 17672,   | 220550, | 2816.7094, | 17710,   | 221728, | 2814.3562, | 17748,   | 221672, | 2812.0029, |
| 7.039063 |         |            | 7.033183 |         |            | 7.027302 |         |            |
| 17673,   | 220532, | 2816.6475, | 17711,   | 221824, | 2814.2942, | 17749,   | 222444, | 2811.9410, |
| 7.038909 |         |            | 7.033028 |         |            | 7.027147 |         |            |
| 17674,   | 220140, | 2816.5855, | 17712,   | 221574, | 2814.2323, | 17750,   | 223004, | 2811.8791, |
| 7.038754 |         |            | 7.032873 |         |            | 7.026992 |         |            |
| 17675,   | 219732, | 2816.5236, | 17713,   | 221434, | 2814.1704, | 17751,   | 223324, | 2811.8172, |
| 7.038599 |         |            | 7.032718 |         |            | 7.026838 |         |            |
| 17676,   | 219556, | 2816.4617, | 17714,   | 221554, | 2814.1085, | 17752,   | 223316, | 2811.7552, |
| 7.038444 |         |            | 7.032564 |         |            | 7.026683 |         |            |
| 17677,   | 219540, | 2816.3998, | 17715,   | 221630, | 2814.0465, | 17753,   | 222866, | 2811.6933, |
| 7.038290 |         |            | 7.032409 |         |            | 7.026528 |         |            |
| 17678,   | 219406, | 2816.3378, | 17716,   | 221338, | 2813.9846, | 17754,   | 222034, | 2811.6314, |
| 7.038135 |         |            | 7.032254 |         |            | 7.026373 |         |            |

|          |         |            |          |         |            |          |         |            |
|----------|---------|------------|----------|---------|------------|----------|---------|------------|
| 17755,   | 221128, | 2811.5695, | 17793,   | 218966, | 2809.2162, | 17831,   | 222706, | 2806.8630, |
| 7.026219 |         |            | 7.020338 |         |            | 7.014457 |         |            |
| 17756,   | 220538, | 2811.5075, | 17794,   | 219124, | 2809.1543, | 17832,   | 221942, | 2806.8011, |
| 7.026064 |         |            | 7.020183 |         |            | 7.014302 |         |            |
| 17757,   | 220372, | 2811.4456, | 17795,   | 219762, | 2809.0924, | 17833,   | 222012, | 2806.7392, |
| 7.025909 |         |            | 7.020028 |         |            | 7.014147 |         |            |
| 17758,   | 220396, | 2811.3837, | 17796,   | 220652, | 2809.0305, | 17834,   | 222690, | 2806.6772, |
| 7.025754 |         |            | 7.019873 |         |            | 7.013993 |         |            |
| 17759,   | 220304, | 2811.3217, | 17797,   | 221436, | 2808.9685, | 17835,   | 223330, | 2806.6153, |
| 7.025600 |         |            | 7.019719 |         |            | 7.013838 |         |            |
| 17760,   | 220050, | 2811.2598, | 17798,   | 222018, | 2808.9066, | 17836,   | 223508, | 2806.5534, |
| 7.025445 |         |            | 7.019564 |         |            | 7.013683 |         |            |
| 17761,   | 219862, | 2811.1979, | 17799,   | 222586, | 2808.8447, | 17837,   | 223344, | 2806.4914, |
| 7.025290 |         |            | 7.019409 |         |            | 7.013528 |         |            |
| 17762,   | 219906, | 2811.1360, | 17800,   | 223298, | 2808.7827, | 17838,   | 223256, | 2806.4295, |
| 7.025135 |         |            | 7.019254 |         |            | 7.013374 |         |            |
| 17763,   | 220022, | 2811.0740, | 17801,   | 223966, | 2808.7208, | 17839,   | 223472, | 2806.3676, |
| 7.024980 |         |            | 7.019100 |         |            | 7.013219 |         |            |
| 17764,   | 219848, | 2811.0121, | 17802,   | 224234, | 2808.6589, | 17840,   | 223844, | 2806.3057, |
| 7.024826 |         |            | 7.018945 |         |            | 7.013064 |         |            |
| 17765,   | 219260, | 2810.9502, | 17803,   | 223994, | 2808.5970, | 17841,   | 224092, | 2806.2437, |
| 7.024671 |         |            | 7.018790 |         |            | 7.012909 |         |            |
| 17766,   | 218580, | 2810.8883, | 17804,   | 223594, | 2808.5350, | 17842,   | 224122, | 2806.1818, |
| 7.024516 |         |            | 7.018635 |         |            | 7.012755 |         |            |
| 17767,   | 218324, | 2810.8263, | 17805,   | 223578, | 2808.4731, | 17843,   | 224042, | 2806.1199, |
| 7.024361 |         |            | 7.018481 |         |            | 7.012600 |         |            |
| 17768,   | 218678, | 2810.7644, | 17806,   | 224152, | 2808.4112, | 17844,   | 223942, | 2806.0580, |
| 7.024207 |         |            | 7.018326 |         |            | 7.012445 |         |            |
| 17769,   | 219294, | 2810.7025, | 17807,   | 224992, | 2808.3493, | 17845,   | 223736, | 2805.9960, |
| 7.024052 |         |            | 7.018171 |         |            | 7.012290 |         |            |
| 17770,   | 219664, | 2810.6406, | 17808,   | 225590, | 2808.2873, | 17846,   | 223328, | 2805.9341, |
| 7.023897 |         |            | 7.018016 |         |            | 7.012136 |         |            |
| 17771,   | 219624, | 2810.5786, | 17809,   | 225708, | 2808.2254, | 17847,   | 222786, | 2805.8722, |
| 7.023742 |         |            | 7.017862 |         |            | 7.011981 |         |            |
| 17772,   | 219528, | 2810.5167, | 17810,   | 225484, | 2808.1635, | 17848,   | 222370, | 2805.8103, |
| 7.023588 |         |            | 7.017707 |         |            | 7.011826 |         |            |
| 17773,   | 219858, | 2810.4548, | 17811,   | 225114, | 2808.1015, | 17849,   | 222218, | 2805.7483, |
| 7.023433 |         |            | 7.017552 |         |            | 7.011671 |         |            |
| 17774,   | 220722, | 2810.3928, | 17812,   | 224560, | 2808.0396, | 17850,   | 222196, | 2805.6864, |
| 7.023278 |         |            | 7.017397 |         |            | 7.011517 |         |            |
| 17775,   | 221760, | 2810.3309, | 17813,   | 223632, | 2807.9777, | 17851,   | 222024, | 2805.6245, |
| 7.023123 |         |            | 7.017243 |         |            | 7.011362 |         |            |
| 17776,   | 222468, | 2810.2690, | 17814,   | 222392, | 2807.9158, | 17852,   | 221612, | 2805.5625, |
| 7.022969 |         |            | 7.017088 |         |            | 7.011207 |         |            |
| 17777,   | 222614, | 2810.2071, | 17815,   | 221272, | 2807.8538, | 17853,   | 221190, | 2805.5006, |
| 7.022814 |         |            | 7.016933 |         |            | 7.011052 |         |            |
| 17778,   | 222338, | 2810.1451, | 17816,   | 220820, | 2807.7919, | 17854,   | 221090, | 2805.4387, |
| 7.022659 |         |            | 7.016778 |         |            | 7.010898 |         |            |
| 17779,   | 221914, | 2810.0832, | 17817,   | 221188, | 2807.7300, | 17855,   | 221406, | 2805.3768, |
| 7.022504 |         |            | 7.016624 |         |            | 7.010743 |         |            |
| 17780,   | 221550, | 2810.0213, | 17818,   | 222006, | 2807.6681, | 17856,   | 221928, | 2805.3148, |
| 7.022350 |         |            | 7.016469 |         |            | 7.010588 |         |            |
| 17781,   | 221388, | 2809.9594, | 17819,   | 222722, | 2807.6061, | 17857,   | 222388, | 2805.2529, |
| 7.022195 |         |            | 7.016314 |         |            | 7.010433 |         |            |
| 17782,   | 221550, | 2809.8974, | 17820,   | 223036, | 2807.5442, | 17858,   | 222686, | 2805.1910, |
| 7.022040 |         |            | 7.016159 |         |            | 7.010279 |         |            |
| 17783,   | 222066, | 2809.8355, | 17821,   | 223022, | 2807.4823, | 17859,   | 222890, | 2805.1291, |
| 7.021885 |         |            | 7.016005 |         |            | 7.010124 |         |            |
| 17784,   | 222716, | 2809.7736, | 17822,   | 222868, | 2807.4204, | 17860,   | 223004, | 2805.0671, |
| 7.021731 |         |            | 7.015850 |         |            | 7.009969 |         |            |
| 17785,   | 223056, | 2809.7116, | 17823,   | 222662, | 2807.3584, | 17861,   | 222918, | 2805.0052, |
| 7.021576 |         |            | 7.015695 |         |            | 7.009814 |         |            |
| 17786,   | 222732, | 2809.6497, | 17824,   | 222440, | 2807.2965, | 17862,   | 222566, | 2804.9433, |
| 7.021421 |         |            | 7.015540 |         |            | 7.009659 |         |            |
| 17787,   | 221806, | 2809.5878, | 17825,   | 222374, | 2807.2346, | 17863,   | 222102, | 2804.8814, |
| 7.021266 |         |            | 7.015386 |         |            | 7.009505 |         |            |
| 17788,   | 220734, | 2809.5259, | 17826,   | 222730, | 2807.1726, | 17864,   | 221828, | 2804.8194, |
| 7.021112 |         |            | 7.015231 |         |            | 7.009350 |         |            |
| 17789,   | 219982, | 2809.4639, | 17827,   | 223526, | 2807.1107, | 17865,   | 221886, | 2804.7575, |
| 7.020957 |         |            | 7.015076 |         |            | 7.009195 |         |            |
| 17790,   | 219636, | 2809.4020, | 17828,   | 224334, | 2807.0488, | 17866,   | 222110, | 2804.6956, |
| 7.020802 |         |            | 7.014921 |         |            | 7.009040 |         |            |
| 17791,   | 219436, | 2809.3401, | 17829,   | 224520, | 2806.9869, | 17867,   | 222246, | 2804.6336, |
| 7.020647 |         |            | 7.014766 |         |            | 7.008886 |         |            |
| 17792,   | 219174, | 2809.2782, | 17830,   | 223832, | 2806.9249, | 17868,   | 222290, | 2804.5717, |
| 7.020493 |         |            | 7.014612 |         |            | 7.008731 |         |            |



|          |         |            |          |         |            |          |         |            |
|----------|---------|------------|----------|---------|------------|----------|---------|------------|
| 17869,   | 222508, | 2804.5098, | 17907,   | 223908, | 2802.1566, | 17945,   | 223040, | 2799.8033, |
| 7.008576 |         |            | 7.002695 |         |            | 6.996815 |         |            |
| 17870,   | 223086, | 2804.4479, | 17908,   | 223352, | 2802.0946, | 17946,   | 223216, | 2799.7414, |
| 7.008421 |         |            | 7.002541 |         |            | 6.996660 |         |            |
| 17871,   | 223750, | 2804.3859, | 17909,   | 223070, | 2802.0327, | 17947,   | 223588, | 2799.6795, |
| 7.008267 |         |            | 7.002386 |         |            | 6.996505 |         |            |
| 17872,   | 223958, | 2804.3240, | 17910,   | 222924, | 2801.9708, | 17948,   | 223960, | 2799.6176, |
| 7.008112 |         |            | 7.002231 |         |            | 6.996350 |         |            |
| 17873,   | 223410, | 2804.2621, | 17911,   | 222586, | 2801.9089, | 17949,   | 224066, | 2799.5556, |
| 7.007957 |         |            | 7.002076 |         |            | 6.996196 |         |            |
| 17874,   | 222458, | 2804.2002, | 17912,   | 222000, | 2801.8469, | 17950,   | 223868, | 2799.4937, |
| 7.007802 |         |            | 7.001922 |         |            | 6.996041 |         |            |
| 17875,   | 221834, | 2804.1382, | 17913,   | 221498, | 2801.7850, | 17951,   | 223620, | 2799.4318, |
| 7.007648 |         |            | 7.001767 |         |            | 6.995886 |         |            |
| 17876,   | 221968, | 2804.0763, | 17914,   | 221440, | 2801.7231, | 17952,   | 223640, | 2799.3699, |
| 7.007493 |         |            | 7.001612 |         |            | 6.995731 |         |            |
| 17877,   | 222604, | 2804.0144, | 17915,   | 221842, | 2801.6612, | 17953,   | 223974, | 2799.3079, |
| 7.007338 |         |            | 7.001457 |         |            | 6.995577 |         |            |
| 17878,   | 223114, | 2803.9524, | 17916,   | 222382, | 2801.5992, | 17954,   | 224400, | 2799.2460, |
| 7.007183 |         |            | 7.001303 |         |            | 6.995422 |         |            |
| 17879,   | 223180, | 2803.8905, | 17917,   | 222786, | 2801.5373, | 17955,   | 224652, | 2799.1841, |
| 7.007029 |         |            | 7.001148 |         |            | 6.995267 |         |            |
| 17880,   | 223066, | 2803.8286, | 17918,   | 223078, | 2801.4754, | 17956,   | 224656, | 2799.1221, |
| 7.006874 |         |            | 7.000993 |         |            | 6.995112 |         |            |
| 17881,   | 223232, | 2803.7667, | 17919,   | 223436, | 2801.4134, | 17957,   | 224496, | 2799.0602, |
| 7.006719 |         |            | 7.000838 |         |            | 6.994957 |         |            |
| 17882,   | 223744, | 2803.7047, | 17920,   | 223844, | 2801.3515, | 17958,   | 224254, | 2798.9983, |
| 7.006564 |         |            | 7.000684 |         |            | 6.994803 |         |            |
| 17883,   | 224170, | 2803.6428, | 17921,   | 224062, | 2801.2896, | 17959,   | 223938, | 2798.9364, |
| 7.006410 |         |            | 7.000529 |         |            | 6.994648 |         |            |
| 17884,   | 224088, | 2803.5809, | 17922,   | 223916, | 2801.2277, | 17960,   | 223568, | 2798.8744, |
| 7.006255 |         |            | 7.000374 |         |            | 6.994493 |         |            |
| 17885,   | 223594, | 2803.5190, | 17923,   | 223584, | 2801.1657, | 17961,   | 223250, | 2798.8125, |
| 7.006100 |         |            | 7.000219 |         |            | 6.994338 |         |            |
| 17886,   | 223264, | 2803.4570, | 17924,   | 223508, | 2801.1038, | 17962,   | 223074, | 2798.7506, |
| 7.005945 |         |            | 7.000064 |         |            | 6.994184 |         |            |
| 17887,   | 223524, | 2803.3951, | 17925,   | 223906, | 2801.0419, | 17963,   | 222950, | 2798.6887, |
| 7.005791 |         |            | 6.999910 |         |            | 6.994029 |         |            |
| 17888,   | 224192, | 2803.3332, | 17926,   | 224526, | 2800.9800, | 17964,   | 222666, | 2798.6267, |
| 7.005636 |         |            | 6.999755 |         |            | 6.993874 |         |            |
| 17889,   | 224672, | 2803.2713, | 17927,   | 224910, | 2800.9180, | 17965,   | 222174, | 2798.5648, |
| 7.005481 |         |            | 6.999600 |         |            | 6.993719 |         |            |
| 17890,   | 224562, | 2803.2093, | 17928,   | 224868, | 2800.8561, | 17966,   | 221794, | 2798.5029, |
| 7.005326 |         |            | 6.999445 |         |            | 6.993565 |         |            |
| 17891,   | 223996, | 2803.1474, | 17929,   | 224688, | 2800.7942, | 17967,   | 222010, | 2798.4410, |
| 7.005172 |         |            | 6.999291 |         |            | 6.993410 |         |            |
| 17892,   | 223428, | 2803.0855, | 17930,   | 224760, | 2800.7322, | 17968,   | 223024, | 2798.3790, |
| 7.005017 |         |            | 6.999136 |         |            | 6.993255 |         |            |
| 17893,   | 223100, | 2803.0235, | 17931,   | 225098, | 2800.6703, | 17969,   | 224470, | 2798.3171, |
| 7.004862 |         |            | 6.998981 |         |            | 6.993100 |         |            |
| 17894,   | 222866, | 2802.9616, | 17932,   | 225318, | 2800.6084, | 17970,   | 225668, | 2798.2552, |
| 7.004707 |         |            | 6.998826 |         |            | 6.992946 |         |            |
| 17895,   | 222490, | 2802.8997, | 17933,   | 225078, | 2800.5465, | 17971,   | 226166, | 2798.1932, |
| 7.004552 |         |            | 6.998672 |         |            | 6.992791 |         |            |
| 17896,   | 222034, | 2802.8378, | 17934,   | 224512, | 2800.4845, | 17972,   | 226074, | 2798.1313, |
| 7.004398 |         |            | 6.998517 |         |            | 6.992636 |         |            |
| 17897,   | 221794, | 2802.7758, | 17935,   | 224142, | 2800.4226, | 17973,   | 225844, | 2798.0694, |
| 7.004243 |         |            | 6.998362 |         |            | 6.992481 |         |            |
| 17898,   | 221928, | 2802.7139, | 17936,   | 224322, | 2800.3607, | 17974,   | 225768, | 2798.0075, |
| 7.004088 |         |            | 6.998207 |         |            | 6.992327 |         |            |
| 17899,   | 222250, | 2802.6520, | 17937,   | 224860, | 2800.2988, | 17975,   | 225736, | 2797.9455, |
| 7.003933 |         |            | 6.998053 |         |            | 6.992172 |         |            |
| 17900,   | 222436, | 2802.5901, | 17938,   | 225186, | 2800.2368, | 17976,   | 225464, | 2797.8836, |
| 7.003779 |         |            | 6.997898 |         |            | 6.992017 |         |            |
| 17901,   | 222440, | 2802.5281, | 17939,   | 224926, | 2800.1749, | 17977,   | 224918, | 2797.8217, |
| 7.003624 |         |            | 6.997743 |         |            | 6.991862 |         |            |
| 17902,   | 222576, | 2802.4662, | 17940,   | 224214, | 2800.1130, | 17978,   | 224372, | 2797.7598, |
| 7.003469 |         |            | 6.997588 |         |            | 6.991708 |         |            |
| 17903,   | 223122, | 2802.4043, | 17941,   | 223512, | 2800.0511, | 17979,   | 224104, | 2797.6978, |
| 7.003314 |         |            | 6.997434 |         |            | 6.991553 |         |            |
| 17904,   | 223932, | 2802.3423, | 17942,   | 223134, | 2799.9891, | 17980,   | 224090, | 2797.6359, |
| 7.003160 |         |            | 6.997279 |         |            | 6.991398 |         |            |
| 17905,   | 224498, | 2802.2804, | 17943,   | 223036, | 2799.9272, | 17981,   | 224090, | 2797.5740, |
| 7.003005 |         |            | 6.997124 |         |            | 6.991243 |         |            |
| 17906,   | 224446, | 2802.2185, | 17944,   | 223018, | 2799.8653, | 17982,   | 223964, | 2797.5120, |
| 7.002850 |         |            | 6.996969 |         |            | 6.991089 |         |            |

|          |         |            |          |         |            |          |         |            |
|----------|---------|------------|----------|---------|------------|----------|---------|------------|
| 17983,   | 223882, | 2797.4501, | 18021,   | 227058, | 2795.0969, | 18059,   | 226792, | 2792.7437, |
| 6.990934 |         |            | 6.985053 |         |            | 6.979172 |         |            |
| 17984,   | 224132, | 2797.3882, | 18022,   | 227220, | 2795.0350, | 18060,   | 226840, | 2792.6817, |
| 6.990779 |         |            | 6.984898 |         |            | 6.979017 |         |            |
| 17985,   | 224798, | 2797.3263, | 18023,   | 227716, | 2794.9730, | 18061,   | 226658, | 2792.6198, |
| 6.990624 |         |            | 6.984743 |         |            | 6.978863 |         |            |
| 17986,   | 225636, | 2797.2643, | 18024,   | 228346, | 2794.9111, | 18062,   | 226216, | 2792.5579, |
| 6.990470 |         |            | 6.984589 |         |            | 6.978708 |         |            |
| 17987,   | 226294, | 2797.2024, | 18025,   | 228736, | 2794.8492, | 18063,   | 225592, | 2792.4960, |
| 6.990315 |         |            | 6.984434 |         |            | 6.978553 |         |            |
| 17988,   | 226646, | 2797.1405, | 18026,   | 228716, | 2794.7873, | 18064,   | 225024, | 2792.4340, |
| 6.990160 |         |            | 6.984279 |         |            | 6.978398 |         |            |
| 17989,   | 226770, | 2797.0786, | 18027,   | 228424, | 2794.7253, | 18065,   | 224792, | 2792.3721, |
| 6.990005 |         |            | 6.984124 |         |            | 6.978244 |         |            |
| 17990,   | 226724, | 2797.0166, | 18028,   | 228034, | 2794.6634, | 18066,   | 224946, | 2792.3102, |
| 6.989850 |         |            | 6.983970 |         |            | 6.978089 |         |            |
| 17991,   | 226442, | 2796.9547, | 18029,   | 227564, | 2794.6015, | 18067,   | 225240, | 2792.2483, |
| 6.989696 |         |            | 6.983815 |         |            | 6.977934 |         |            |
| 17992,   | 225866, | 2796.8928, | 18030,   | 226944, | 2794.5396, | 18068,   | 225384, | 2792.1863, |
| 6.989541 |         |            | 6.983660 |         |            | 6.977779 |         |            |
| 17993,   | 225188, | 2796.8309, | 18031,   | 226252, | 2794.4776, | 18069,   | 225332, | 2792.1244, |
| 6.989386 |         |            | 6.983505 |         |            | 6.977625 |         |            |
| 17994,   | 224772, | 2796.7689, | 18032,   | 225778, | 2794.4157, | 18070,   | 225276, | 2792.0625, |
| 6.989231 |         |            | 6.983351 |         |            | 6.977470 |         |            |
| 17995,   | 224856, | 2796.7070, | 18033,   | 225764, | 2794.3538, | 18071,   | 225406, | 2792.0006, |
| 6.989077 |         |            | 6.983196 |         |            | 6.977315 |         |            |
| 17996,   | 225276, | 2796.6451, | 18034,   | 226122, | 2794.2918, | 18072,   | 225652, | 2791.9386, |
| 6.988922 |         |            | 6.983041 |         |            | 6.977160 |         |            |
| 17997,   | 225602, | 2796.5831, | 18035,   | 226502, | 2794.2299, | 18073,   | 225760, | 2791.8767, |
| 6.988767 |         |            | 6.982886 |         |            | 6.977006 |         |            |
| 17998,   | 225592, | 2796.5212, | 18036,   | 226638, | 2794.1680, | 18074,   | 225614, | 2791.8148, |
| 6.988612 |         |            | 6.982732 |         |            | 6.976851 |         |            |
| 17999,   | 225402, | 2796.4593, | 18037,   | 226626, | 2794.1061, | 18075,   | 225364, | 2791.7528, |
| 6.988458 |         |            | 6.982577 |         |            | 6.976696 |         |            |
| 18000,   | 225350, | 2796.3974, | 18038,   | 226754, | 2794.0441, | 18076,   | 225270, | 2791.6909, |
| 6.988303 |         |            | 6.982422 |         |            | 6.976541 |         |            |
| 18001,   | 225508, | 2796.3354, | 18039,   | 227124, | 2793.9822, | 18077,   | 225402, | 2791.6290, |
| 6.988148 |         |            | 6.982267 |         |            | 6.976387 |         |            |
| 18002,   | 225572, | 2796.2735, | 18040,   | 227480, | 2793.9203, | 18078,   | 225554, | 2791.5671, |
| 6.987993 |         |            | 6.982113 |         |            | 6.976232 |         |            |
| 18003,   | 225186, | 2796.2116, | 18041,   | 227460, | 2793.8584, | 18079,   | 225512, | 2791.5051, |
| 6.987839 |         |            | 6.981958 |         |            | 6.976077 |         |            |
| 18004,   | 224372, | 2796.1497, | 18042,   | 226986, | 2793.7964, | 18080,   | 225336, | 2791.4432, |
| 6.987684 |         |            | 6.981803 |         |            | 6.975922 |         |            |
| 18005,   | 223522, | 2796.0877, | 18043,   | 226356, | 2793.7345, | 18081,   | 225296, | 2791.3813, |
| 6.987529 |         |            | 6.981648 |         |            | 6.975768 |         |            |
| 18006,   | 223014, | 2796.0258, | 18044,   | 225932, | 2793.6726, | 18082,   | 225578, | 2791.3194, |
| 6.987374 |         |            | 6.981494 |         |            | 6.975613 |         |            |
| 18007,   | 222866, | 2795.9639, | 18045,   | 225764, | 2793.6107, | 18083,   | 226012, | 2791.2574, |
| 6.987220 |         |            | 6.981339 |         |            | 6.975458 |         |            |
| 18008,   | 222828, | 2795.9019, | 18046,   | 225602, | 2793.5487, | 18084,   | 226246, | 2791.1955, |
| 6.987065 |         |            | 6.981184 |         |            | 6.975303 |         |            |
| 18009,   | 222814, | 2795.8400, | 18047,   | 225220, | 2793.4868, | 18085,   | 226118, | 2791.1336, |
| 6.986910 |         |            | 6.981029 |         |            | 6.975149 |         |            |
| 18010,   | 223054, | 2795.7781, | 18048,   | 224710, | 2793.4249, | 18086,   | 225844, | 2791.0717, |
| 6.986755 |         |            | 6.980875 |         |            | 6.974994 |         |            |
| 18011,   | 223828, | 2795.7162, | 18049,   | 224344, | 2793.3629, | 18087,   | 225834, | 2791.0097, |
| 6.986601 |         |            | 6.980720 |         |            | 6.974839 |         |            |
| 18012,   | 225010, | 2795.6542, | 18050,   | 224260, | 2793.3010, | 18088,   | 226284, | 2790.9478, |
| 6.986446 |         |            | 6.980565 |         |            | 6.974684 |         |            |
| 18013,   | 226052, | 2795.5923, | 18051,   | 224304, | 2793.2391, | 18089,   | 227024, | 2790.8859, |
| 6.986291 |         |            | 6.980410 |         |            | 6.974529 |         |            |
| 18014,   | 226428, | 2795.5304, | 18052,   | 224238, | 2793.1772, | 18090,   | 227674, | 2790.8239, |
| 6.986136 |         |            | 6.980256 |         |            | 6.974375 |         |            |
| 18015,   | 226162, | 2795.4685, | 18053,   | 224040, | 2793.1152, | 18091,   | 227976, | 2790.7620, |
| 6.985982 |         |            | 6.980101 |         |            | 6.974220 |         |            |
| 18016,   | 225790, | 2795.4065, | 18054,   | 223978, | 2793.0533, | 18092,   | 227892, | 2790.7001, |
| 6.985827 |         |            | 6.979946 |         |            | 6.974065 |         |            |
| 18017,   | 225826, | 2795.3446, | 18055,   | 224318, | 2792.9914, | 18093,   | 227488, | 2790.6382, |
| 6.985672 |         |            | 6.979791 |         |            | 6.973910 |         |            |
| 18018,   | 226304, | 2795.2827, | 18056,   | 225042, | 2792.9295, | 18094,   | 226814, | 2790.5762, |
| 6.985517 |         |            | 6.979636 |         |            | 6.973756 |         |            |
| 18019,   | 226824, | 2795.2208, | 18057,   | 225864, | 2792.8675, | 18095,   | 225930, | 2790.5143, |
| 6.985363 |         |            | 6.979482 |         |            | 6.973601 |         |            |
| 18020,   | 227046, | 2795.1588, | 18058,   | 226484, | 2792.8056, | 18096,   | 225022, | 2790.4524, |
| 6.985208 |         |            | 6.979327 |         |            | 6.973446 |         |            |

|          |         |            |          |         |            |          |         |            |
|----------|---------|------------|----------|---------|------------|----------|---------|------------|
| 18097,   | 224344, | 2790.3905, | 18135,   | 227422, | 2788.0372, | 18173,   | 226226, | 2785.6840, |
| 6.973291 |         |            | 6.967411 |         |            | 6.961530 |         |            |
| 18098,   | 224052, | 2790.3285, | 18136,   | 228246, | 2787.9753, | 18174,   | 225872, | 2785.6221, |
| 6.973137 |         |            | 6.967256 |         |            | 6.961375 |         |            |
| 18099,   | 224038, | 2790.2666, | 18137,   | 228824, | 2787.9134, | 18175,   | 225542, | 2785.5602, |
| 6.972982 |         |            | 6.967101 |         |            | 6.961220 |         |            |
| 18100,   | 224042, | 2790.2047, | 18138,   | 228936, | 2787.8515, | 18176,   | 225356, | 2785.4982, |
| 6.972827 |         |            | 6.966946 |         |            | 6.961066 |         |            |
| 18101,   | 223890, | 2790.1427, | 18139,   | 228556, | 2787.7895, | 18177,   | 225262, | 2785.4363, |
| 6.972672 |         |            | 6.966792 |         |            | 6.960911 |         |            |
| 18102,   | 223656, | 2790.0808, | 18140,   | 228032, | 2787.7276, | 18178,   | 225150, | 2785.3744, |
| 6.972518 |         |            | 6.966637 |         |            | 6.960756 |         |            |
| 18103,   | 223520, | 2790.0189, | 18141,   | 227852, | 2787.6657, | 18179,   | 224950, | 2785.3124, |
| 6.972363 |         |            | 6.966482 |         |            | 6.960601 |         |            |
| 18104,   | 223562, | 2789.9570, | 18142,   | 228232, | 2787.6037, | 18180,   | 224662, | 2785.2505, |
| 6.972208 |         |            | 6.966327 |         |            | 6.960447 |         |            |
| 18105,   | 223732, | 2789.8950, | 18143,   | 228910, | 2787.5418, | 18181,   | 224360, | 2785.1886, |
| 6.972053 |         |            | 6.966173 |         |            | 6.960292 |         |            |
| 18106,   | 223978, | 2789.8331, | 18144,   | 229388, | 2787.4799, | 18182,   | 224182, | 2785.1267, |
| 6.971899 |         |            | 6.966018 |         |            | 6.960137 |         |            |
| 18107,   | 224340, | 2789.7712, | 18145,   | 229332, | 2787.4180, | 18183,   | 224286, | 2785.0647, |
| 6.971744 |         |            | 6.965863 |         |            | 6.959982 |         |            |
| 18108,   | 224888, | 2789.7093, | 18146,   | 228818, | 2787.3560, | 18184,   | 224732, | 2785.0028, |
| 6.971589 |         |            | 6.965708 |         |            | 6.959828 |         |            |
| 18109,   | 225498, | 2789.6473, | 18147,   | 228154, | 2787.2941, | 18185,   | 225372, | 2784.9409, |
| 6.971434 |         |            | 6.965554 |         |            | 6.959673 |         |            |
| 18110,   | 225890, | 2789.5854, | 18148,   | 227602, | 2787.2322, | 18186,   | 225926, | 2784.8790, |
| 6.971280 |         |            | 6.965399 |         |            | 6.959518 |         |            |
| 18111,   | 225858, | 2789.5235, | 18149,   | 227266, | 2787.1703, | 18187,   | 226160, | 2784.8170, |
| 6.971125 |         |            | 6.965244 |         |            | 6.959363 |         |            |
| 18112,   | 225546, | 2789.4616, | 18150,   | 227150, | 2787.1083, | 18188,   | 226024, | 2784.7551, |
| 6.970970 |         |            | 6.965089 |         |            | 6.959208 |         |            |
| 18113,   | 225304, | 2789.3996, | 18151,   | 227236, | 2787.0464, | 18189,   | 225638, | 2784.6932, |
| 6.970815 |         |            | 6.964935 |         |            | 6.959054 |         |            |
| 18114,   | 225390, | 2789.3377, | 18152,   | 227440, | 2786.9845, | 18190,   | 225132, | 2784.6313, |
| 6.970661 |         |            | 6.964780 |         |            | 6.958899 |         |            |
| 18115,   | 225630, | 2789.2758, | 18153,   | 227598, | 2786.9225, | 18191,   | 224588, | 2784.5693, |
| 6.970506 |         |            | 6.964625 |         |            | 6.958744 |         |            |
| 18116,   | 225646, | 2789.2138, | 18154,   | 227530, | 2786.8606, | 18192,   | 224084, | 2784.5074, |
| 6.970351 |         |            | 6.964470 |         |            | 6.958589 |         |            |
| 18117,   | 225294, | 2789.1519, | 18155,   | 227262, | 2786.7987, | 18193,   | 223764, | 2784.4455, |
| 6.970196 |         |            | 6.964315 |         |            | 6.958435 |         |            |
| 18118,   | 224876, | 2789.0900, | 18156,   | 227046, | 2786.7368, | 18194,   | 223802, | 2784.3835, |
| 6.970042 |         |            | 6.964161 |         |            | 6.958280 |         |            |
| 18119,   | 224866, | 2789.0281, | 18157,   | 227146, | 2786.6748, | 18195,   | 224196, | 2784.3216, |
| 6.969887 |         |            | 6.964006 |         |            | 6.958125 |         |            |
| 18120,   | 225386, | 2788.9661, | 18158,   | 227518, | 2786.6129, | 18196,   | 224740, | 2784.2597, |
| 6.969732 |         |            | 6.963851 |         |            | 6.957970 |         |            |
| 18121,   | 226030, | 2788.9042, | 18159,   | 227792, | 2786.5510, | 18197,   | 225180, | 2784.1978, |
| 6.969577 |         |            | 6.963696 |         |            | 6.957816 |         |            |
| 18122,   | 226242, | 2788.8423, | 18160,   | 227594, | 2786.4891, | 18198,   | 225454, | 2784.1358, |
| 6.969422 |         |            | 6.963542 |         |            | 6.957661 |         |            |
| 18123,   | 225834, | 2788.7804, | 18161,   | 226908, | 2786.4271, | 18199,   | 225740, | 2784.0739, |
| 6.969268 |         |            | 6.963387 |         |            | 6.957506 |         |            |
| 18124,   | 225154, | 2788.7184, | 18162,   | 226086, | 2786.3652, | 18200,   | 226206, | 2784.0120, |
| 6.969113 |         |            | 6.963232 |         |            | 6.957351 |         |            |
| 18125,   | 224670, | 2788.6565, | 18163,   | 225500, | 2786.3033, | 18201,   | 226752, | 2783.9501, |
| 6.968958 |         |            | 6.963077 |         |            | 6.957197 |         |            |
| 18126,   | 224498, | 2788.5946, | 18164,   | 225180, | 2786.2414, | 18202,   | 227034, | 2783.8881, |
| 6.968803 |         |            | 6.962923 |         |            | 6.957042 |         |            |
| 18127,   | 224354, | 2788.5326, | 18165,   | 224858, | 2786.1794, | 18203,   | 226816, | 2783.8262, |
| 6.968649 |         |            | 6.962768 |         |            | 6.956887 |         |            |
| 18128,   | 223956, | 2788.4707, | 18166,   | 224326, | 2786.1175, | 18204,   | 226274, | 2783.7643, |
| 6.968494 |         |            | 6.962613 |         |            | 6.956732 |         |            |
| 18129,   | 223408, | 2788.4088, | 18167,   | 223746, | 2786.0556, | 18205,   | 225892, | 2783.7023, |
| 6.968339 |         |            | 6.962458 |         |            | 6.956578 |         |            |
| 18130,   | 223132, | 2788.3469, | 18168,   | 223550, | 2785.9936, | 18206,   | 226064, | 2783.6404, |
| 6.968184 |         |            | 6.962304 |         |            | 6.956423 |         |            |
| 18131,   | 223470, | 2788.2849, | 18169,   | 224014, | 2785.9317, | 18207,   | 226778, | 2783.5785, |
| 6.968030 |         |            | 6.962149 |         |            | 6.956268 |         |            |
| 18132,   | 224362, | 2788.2230, | 18170,   | 224950, | 2785.8698, | 18208,   | 227688, | 2783.5166, |
| 6.967875 |         |            | 6.961994 |         |            | 6.956113 |         |            |
| 18133,   | 225466, | 2788.1611, | 18171,   | 225858, | 2785.8079, | 18209,   | 228502, | 2783.4546, |
| 6.967720 |         |            | 6.961839 |         |            | 6.955959 |         |            |
| 18134,   | 226502, | 2788.0992, | 18172,   | 226308, | 2785.7459, | 18210,   | 229200, | 2783.3927, |
| 6.967565 |         |            | 6.961685 |         |            | 6.955804 |         |            |

|          |         |            |          |         |            |          |         |            |
|----------|---------|------------|----------|---------|------------|----------|---------|------------|
| 18211,   | 229922, | 2783.3308, | 18249,   | 230254, | 2780.9776, | 18287,   | 230872, | 2778.6243, |
| 6.955649 |         |            | 6.949768 |         |            | 6.943887 |         |            |
| 18212,   | 230648, | 2783.2689, | 18250,   | 229954, | 2780.9156, | 18288,   | 231478, | 2778.5624, |
| 6.955494 |         |            | 6.949613 |         |            | 6.943733 |         |            |
| 18213,   | 231144, | 2783.2069, | 18251,   | 229694, | 2780.8537, | 18289,   | 232052, | 2778.5005, |
| 6.955340 |         |            | 6.949459 |         |            | 6.943578 |         |            |
| 18214,   | 231204, | 2783.1450, | 18252,   | 229556, | 2780.7918, | 18290,   | 232054, | 2778.4386, |
| 6.955185 |         |            | 6.949304 |         |            | 6.943423 |         |            |
| 18215,   | 230910, | 2783.0831, | 18253,   | 229582, | 2780.7299, | 18291,   | 231326, | 2778.3766, |
| 6.955030 |         |            | 6.949149 |         |            | 6.943268 |         |            |
| 18216,   | 230602, | 2783.0212, | 18254,   | 229766, | 2780.6679, | 18292,   | 230194, | 2778.3147, |
| 6.954875 |         |            | 6.948994 |         |            | 6.943114 |         |            |
| 18217,   | 230556, | 2782.9592, | 18255,   | 229920, | 2780.6060, | 18293,   | 229116, | 2778.2528, |
| 6.954720 |         |            | 6.948840 |         |            | 6.942959 |         |            |
| 18218,   | 230722, | 2782.8973, | 18256,   | 229726, | 2780.5441, | 18294,   | 228296, | 2778.1909, |
| 6.954566 |         |            | 6.948685 |         |            | 6.942804 |         |            |
| 18219,   | 230836, | 2782.8354, | 18257,   | 229032, | 2780.4821, | 18295,   | 227646, | 2778.1289, |
| 6.954411 |         |            | 6.948530 |         |            | 6.942649 |         |            |
| 18220,   | 230740, | 2782.7734, | 18258,   | 228018, | 2780.4202, | 18296,   | 227010, | 2778.0670, |
| 6.954256 |         |            | 6.948375 |         |            | 6.942495 |         |            |
| 18221,   | 230506, | 2782.7115, | 18259,   | 227102, | 2780.3583, | 18297,   | 226418, | 2778.0051, |
| 6.954101 |         |            | 6.948221 |         |            | 6.942340 |         |            |
| 18222,   | 230290, | 2782.6496, | 18260,   | 226564, | 2780.2964, | 18298,   | 226054, | 2777.9431, |
| 6.953947 |         |            | 6.948066 |         |            | 6.942185 |         |            |
| 18223,   | 230038, | 2782.5877, | 18261,   | 226340, | 2780.2344, | 18299,   | 226058, | 2777.8812, |
| 6.953792 |         |            | 6.947911 |         |            | 6.942030 |         |            |
| 18224,   | 229498, | 2782.5257, | 18262,   | 226150, | 2780.1725, | 18300,   | 226410, | 2777.8193, |
| 6.953637 |         |            | 6.947756 |         |            | 6.941876 |         |            |
| 18225,   | 228530, | 2782.4638, | 18263,   | 225902, | 2780.1106, | 18301,   | 226962, | 2777.7574, |
| 6.953482 |         |            | 6.947602 |         |            | 6.941721 |         |            |
| 18226,   | 227348, | 2782.4019, | 18264,   | 225818, | 2780.0487, | 18302,   | 227530, | 2777.6954, |
| 6.953328 |         |            | 6.947447 |         |            | 6.941566 |         |            |
| 18227,   | 226414, | 2782.3400, | 18265,   | 226212, | 2779.9867, | 18303,   | 227922, | 2777.6335, |
| 6.953173 |         |            | 6.947292 |         |            | 6.941411 |         |            |
| 18228,   | 226068, | 2782.2780, | 18266,   | 227050, | 2779.9248, | 18304,   | 227978, | 2777.5716, |
| 6.953018 |         |            | 6.947137 |         |            | 6.941257 |         |            |
| 18229,   | 226238, | 2782.2161, | 18267,   | 227882, | 2779.8629, | 18305,   | 227666, | 2777.5097, |
| 6.952863 |         |            | 6.946983 |         |            | 6.941102 |         |            |
| 18230,   | 226614, | 2782.1542, | 18268,   | 228226, | 2779.8010, | 18306,   | 227216, | 2777.4477, |
| 6.952709 |         |            | 6.946828 |         |            | 6.940947 |         |            |
| 18231,   | 226940, | 2782.0922, | 18269,   | 227994, | 2779.7390, | 18307,   | 227062, | 2777.3858, |
| 6.952554 |         |            | 6.946673 |         |            | 6.940792 |         |            |
| 18232,   | 227230, | 2782.0303, | 18270,   | 227618, | 2779.6771, | 18308,   | 227500, | 2777.3239, |
| 6.952399 |         |            | 6.946518 |         |            | 6.940638 |         |            |
| 18233,   | 227572, | 2781.9684, | 18271,   | 227606, | 2779.6152, | 18309,   | 228374, | 2777.2620, |
| 6.952244 |         |            | 6.946364 |         |            | 6.940483 |         |            |
| 18234,   | 227918, | 2781.9065, | 18272,   | 228138, | 2779.5532, | 18310,   | 229132, | 2777.2000, |
| 6.952090 |         |            | 6.946209 |         |            | 6.940328 |         |            |
| 18235,   | 228058, | 2781.8445, | 18273,   | 228972, | 2779.4913, | 18311,   | 229248, | 2777.1381, |
| 6.951935 |         |            | 6.946054 |         |            | 6.940173 |         |            |
| 18236,   | 227866, | 2781.7826, | 18274,   | 229764, | 2779.4294, | 18312,   | 228736, | 2777.0762, |
| 6.951780 |         |            | 6.945899 |         |            | 6.940019 |         |            |
| 18237,   | 227510, | 2781.7207, | 18275,   | 230370, | 2779.3675, | 18313,   | 228136, | 2777.0142, |
| 6.951625 |         |            | 6.945745 |         |            | 6.939864 |         |            |
| 18238,   | 227300, | 2781.6588, | 18276,   | 230812, | 2779.3055, | 18314,   | 228026, | 2776.9523, |
| 6.951471 |         |            | 6.945590 |         |            | 6.939709 |         |            |
| 18239,   | 227388, | 2781.5968, | 18277,   | 231088, | 2779.2436, | 18315,   | 228476, | 2776.8904, |
| 6.951316 |         |            | 6.945435 |         |            | 6.939554 |         |            |
| 18240,   | 227620, | 2781.5349, | 18278,   | 231098, | 2779.1817, | 18316,   | 229032, | 2776.8285, |
| 6.951161 |         |            | 6.945280 |         |            | 6.939399 |         |            |
| 18241,   | 227744, | 2781.4730, | 18279,   | 230808, | 2779.1198, | 18317,   | 229162, | 2776.7665, |
| 6.951006 |         |            | 6.945126 |         |            | 6.939245 |         |            |
| 18242,   | 227724, | 2781.4111, | 18280,   | 230432, | 2779.0578, | 18318,   | 228772, | 2776.7046, |
| 6.950852 |         |            | 6.944971 |         |            | 6.939090 |         |            |
| 18243,   | 227810, | 2781.3491, | 18281,   | 230310, | 2778.9959, | 18319,   | 228248, | 2776.6427, |
| 6.950697 |         |            | 6.944816 |         |            | 6.938935 |         |            |
| 18244,   | 228262, | 2781.2872, | 18282,   | 230564, | 2778.9340, | 18320,   | 228062, | 2776.5808, |
| 6.950542 |         |            | 6.944661 |         |            | 6.938780 |         |            |
| 18245,   | 229064, | 2781.2253, | 18283,   | 230950, | 2778.8721, | 18321,   | 228382, | 2776.5188, |
| 6.950387 |         |            | 6.944506 |         |            | 6.938626 |         |            |
| 18246,   | 229892, | 2781.1633, | 18284,   | 231088, | 2778.8101, | 18322,   | 229018, | 2776.4569, |
| 6.950233 |         |            | 6.944352 |         |            | 6.938471 |         |            |
| 18247,   | 230396, | 2781.1014, | 18285,   | 230892, | 2778.7482, | 18323,   | 229670, | 2776.3950, |
| 6.950078 |         |            | 6.944197 |         |            | 6.938316 |         |            |
| 18248,   | 230468, | 2781.0395, | 18286,   | 230684, | 2778.6863, | 18324,   | 230108, | 2776.3330, |
| 6.949923 |         |            | 6.944042 |         |            | 6.938161 |         |            |

|          |         |            |          |         |            |          |         |            |
|----------|---------|------------|----------|---------|------------|----------|---------|------------|
| 18325,   | 230204, | 2776.2711, | 18363,   | 228974, | 2773.9179, | 18401,   | 230996, | 2771.5647, |
| 6.938007 |         |            | 6.932126 |         |            | 6.926245 |         |            |
| 18326,   | 229866, | 2776.2092, | 18364,   | 229336, | 2773.8560, | 18402,   | 231022, | 2771.5027, |
| 6.937852 |         |            | 6.931971 |         |            | 6.926090 |         |            |
| 18327,   | 229124, | 2776.1473, | 18365,   | 229788, | 2773.7940, | 18403,   | 231376, | 2771.4408, |
| 6.937697 |         |            | 6.931816 |         |            | 6.925936 |         |            |
| 18328,   | 228236, | 2776.0853, | 18366,   | 230052, | 2773.7321, | 18404,   | 231690, | 2771.3789, |
| 6.937542 |         |            | 6.931662 |         |            | 6.925781 |         |            |
| 18329,   | 227624, | 2776.0234, | 18367,   | 230120, | 2773.6702, | 18405,   | 231754, | 2771.3170, |
| 6.937388 |         |            | 6.931507 |         |            | 6.925626 |         |            |
| 18330,   | 227580, | 2775.9615, | 18368,   | 230204, | 2773.6083, | 18406,   | 231560, | 2771.2550, |
| 6.937233 |         |            | 6.931352 |         |            | 6.925471 |         |            |
| 18331,   | 227988, | 2775.8996, | 18369,   | 230416, | 2773.5463, | 18407,   | 231168, | 2771.1931, |
| 6.937078 |         |            | 6.931197 |         |            | 6.925317 |         |            |
| 18332,   | 228444, | 2775.8376, | 18370,   | 230566, | 2773.4844, | 18408,   | 230600, | 2771.1312, |
| 6.936923 |         |            | 6.931043 |         |            | 6.925162 |         |            |
| 18333,   | 228658, | 2775.7757, | 18371,   | 230386, | 2773.4225, | 18409,   | 229938, | 2771.0693, |
| 6.936769 |         |            | 6.930888 |         |            | 6.925007 |         |            |
| 18334,   | 228740, | 2775.7138, | 18372,   | 229892, | 2773.3606, | 18410,   | 229416, | 2771.0073, |
| 6.936614 |         |            | 6.930733 |         |            | 6.924852 |         |            |
| 18335,   | 229014, | 2775.6519, | 18373,   | 229464, | 2773.2986, | 18411,   | 229334, | 2770.9454, |
| 6.936459 |         |            | 6.930578 |         |            | 6.924698 |         |            |
| 18336,   | 229594, | 2775.5899, | 18374,   | 229480, | 2773.2367, | 18412,   | 229816, | 2770.8835, |
| 6.936304 |         |            | 6.930424 |         |            | 6.924543 |         |            |
| 18337,   | 230158, | 2775.5280, | 18375,   | 229896, | 2773.1748, | 18413,   | 230654, | 2770.8216, |
| 6.936150 |         |            | 6.930269 |         |            | 6.924388 |         |            |
| 18338,   | 230240, | 2775.4661, | 18376,   | 230242, | 2773.1128, | 18414,   | 231410, | 2770.7596, |
| 6.935995 |         |            | 6.930114 |         |            | 6.924233 |         |            |
| 18339,   | 229736, | 2775.4041, | 18377,   | 230064, | 2773.0509, | 18415,   | 231754, | 2770.6977, |
| 6.935840 |         |            | 6.929959 |         |            | 6.924078 |         |            |
| 18340,   | 229014, | 2775.3422, | 18378,   | 229326, | 2772.9890, | 18416,   | 231656, | 2770.6358, |
| 6.935685 |         |            | 6.929805 |         |            | 6.923924 |         |            |
| 18341,   | 228544, | 2775.2803, | 18379,   | 228424, | 2772.9271, | 18417,   | 231302, | 2770.5738, |
| 6.935531 |         |            | 6.929650 |         |            | 6.923769 |         |            |
| 18342,   | 228404, | 2775.2184, | 18380,   | 227798, | 2772.8651, | 18418,   | 230880, | 2770.5119, |
| 6.935376 |         |            | 6.929495 |         |            | 6.923614 |         |            |
| 18343,   | 228228, | 2775.1564, | 18381,   | 227628, | 2772.8032, | 18419,   | 230482, | 2770.4500, |
| 6.935221 |         |            | 6.929340 |         |            | 6.923459 |         |            |
| 18344,   | 227684, | 2775.0945, | 18382,   | 227832, | 2772.7413, | 18420,   | 230150, | 2770.3881, |
| 6.935066 |         |            | 6.929185 |         |            | 6.923305 |         |            |
| 18345,   | 226902, | 2775.0326, | 18383,   | 228272, | 2772.6794, | 18421,   | 229974, | 2770.3261, |
| 6.934912 |         |            | 6.929031 |         |            | 6.923150 |         |            |
| 18346,   | 226348, | 2774.9707, | 18384,   | 228870, | 2772.6174, | 18422,   | 230010, | 2770.2642, |
| 6.934757 |         |            | 6.928876 |         |            | 6.922995 |         |            |
| 18347,   | 226350, | 2774.9087, | 18385,   | 229524, | 2772.5555, | 18423,   | 230140, | 2770.2023, |
| 6.934602 |         |            | 6.928721 |         |            | 6.922840 |         |            |
| 18348,   | 226766, | 2774.8468, | 18386,   | 230016, | 2772.4936, | 18424,   | 230122, | 2770.1404, |
| 6.934447 |         |            | 6.928566 |         |            | 6.922686 |         |            |
| 18349,   | 227166, | 2774.7849, | 18387,   | 230146, | 2772.4317, | 18425,   | 229764, | 2770.0784, |
| 6.934292 |         |            | 6.928412 |         |            | 6.922531 |         |            |
| 18350,   | 227336, | 2774.7229, | 18388,   | 229930, | 2772.3697, | 18426,   | 229146, | 2770.0165, |
| 6.934138 |         |            | 6.928257 |         |            | 6.922376 |         |            |
| 18351,   | 227458, | 2774.6610, | 18389,   | 229662, | 2772.3078, | 18427,   | 228550, | 2769.9546, |
| 6.933983 |         |            | 6.928102 |         |            | 6.922221 |         |            |
| 18352,   | 227804, | 2774.5991, | 18390,   | 229662, | 2772.2459, | 18428,   | 228226, | 2769.8926, |
| 6.933828 |         |            | 6.927947 |         |            | 6.922067 |         |            |
| 18353,   | 228306, | 2774.5372, | 18391,   | 230026, | 2772.1839, | 18429,   | 228218, | 2769.8307, |
| 6.933673 |         |            | 6.927793 |         |            | 6.921912 |         |            |
| 18354,   | 228562, | 2774.4752, | 18392,   | 230564, | 2772.1220, | 18430,   | 228410, | 2769.7688, |
| 6.933519 |         |            | 6.927638 |         |            | 6.921757 |         |            |
| 18355,   | 228274, | 2774.4133, | 18393,   | 231092, | 2772.0601, | 18431,   | 228742, | 2769.7069, |
| 6.933364 |         |            | 6.927483 |         |            | 6.921602 |         |            |
| 18356,   | 227656, | 2774.3514, | 18394,   | 231606, | 2771.9982, | 18432,   | 229264, | 2769.6449, |
| 6.933209 |         |            | 6.927328 |         |            | 6.921448 |         |            |
| 18357,   | 227290, | 2774.2895, | 18395,   | 232216, | 2771.9362, | 18433,   | 230008, | 2769.5830, |
| 6.933054 |         |            | 6.927174 |         |            | 6.921293 |         |            |
| 18358,   | 227540, | 2774.2275, | 18396,   | 232872, | 2771.8743, | 18434,   | 230828, | 2769.5211, |
| 6.932900 |         |            | 6.927019 |         |            | 6.921138 |         |            |
| 18359,   | 228224, | 2774.1656, | 18397,   | 233274, | 2771.8124, | 18435,   | 231428, | 2769.4592, |
| 6.932745 |         |            | 6.926864 |         |            | 6.920983 |         |            |
| 18360,   | 228810, | 2774.1037, | 18398,   | 233108, | 2771.7505, | 18436,   | 231656, | 2769.3972, |
| 6.932590 |         |            | 6.926709 |         |            | 6.920829 |         |            |
| 18361,   | 228984, | 2774.0418, | 18399,   | 232382, | 2771.6885, | 18437,   | 231638, | 2769.3353, |
| 6.932435 |         |            | 6.926555 |         |            | 6.920674 |         |            |
| 18362,   | 228906, | 2773.9798, | 18400,   | 231512, | 2771.6266, | 18438,   | 231666, | 2769.2734, |
| 6.932281 |         |            | 6.926400 |         |            | 6.920519 |         |            |

|          |         |            |          |         |            |          |         |            |
|----------|---------|------------|----------|---------|------------|----------|---------|------------|
| 18439,   | 231902, | 2769.2115, | 18477,   | 228090, | 2766.8582, | 18515,   | 233080, | 2764.5050, |
| 6.920364 |         |            | 6.914484 |         |            | 6.908603 |         |            |
| 18440,   | 232254, | 2769.1495, | 18478,   | 228074, | 2766.7963, | 18516,   | 232378, | 2764.4431, |
| 6.920210 |         |            | 6.914329 |         |            | 6.908448 |         |            |
| 18441,   | 232496, | 2769.0876, | 18479,   | 228182, | 2766.7344, | 18517,   | 231228, | 2764.3812, |
| 6.920055 |         |            | 6.914174 |         |            | 6.908293 |         |            |
| 18442,   | 232516, | 2769.0257, | 18480,   | 228082, | 2766.6724, | 18518,   | 230100, | 2764.3192, |
| 6.919900 |         |            | 6.914019 |         |            | 6.908138 |         |            |
| 18443,   | 232318, | 2768.9637, | 18481,   | 227808, | 2766.6105, | 18519,   | 229586, | 2764.2573, |
| 6.919745 |         |            | 6.913864 |         |            | 6.907984 |         |            |
| 18444,   | 231908, | 2768.9018, | 18482,   | 227692, | 2766.5486, | 18520,   | 229870, | 2764.1954, |
| 6.919591 |         |            | 6.913710 |         |            | 6.907829 |         |            |
| 18445,   | 231188, | 2768.8399, | 18483,   | 227948, | 2766.4867, | 18521,   | 230576, | 2764.1334, |
| 6.919436 |         |            | 6.913555 |         |            | 6.907674 |         |            |
| 18446,   | 230126, | 2768.7780, | 18484,   | 228424, | 2766.4247, | 18522,   | 231104, | 2764.0715, |
| 6.919281 |         |            | 6.913400 |         |            | 6.907519 |         |            |
| 18447,   | 228976, | 2768.7160, | 18485,   | 228760, | 2766.3628, | 18523,   | 231198, | 2764.0096, |
| 6.919126 |         |            | 6.913245 |         |            | 6.907365 |         |            |
| 18448,   | 228224, | 2768.6541, | 18486,   | 228756, | 2766.3009, | 18524,   | 231084, | 2763.9477, |
| 6.918971 |         |            | 6.913091 |         |            | 6.907210 |         |            |
| 18449,   | 228248, | 2768.5922, | 18487,   | 228522, | 2766.2390, | 18525,   | 231118, | 2763.8857, |
| 6.918817 |         |            | 6.912936 |         |            | 6.907055 |         |            |
| 18450,   | 228938, | 2768.5303, | 18488,   | 228348, | 2766.1770, | 18526,   | 231288, | 2763.8238, |
| 6.918662 |         |            | 6.912781 |         |            | 6.906900 |         |            |
| 18451,   | 229776, | 2768.4683, | 18489,   | 228470, | 2766.1151, | 18527,   | 231224, | 2763.7619, |
| 6.918507 |         |            | 6.912626 |         |            | 6.906746 |         |            |
| 18452,   | 230284, | 2768.4064, | 18490,   | 228992, | 2766.0532, | 18528,   | 230640, | 2763.7000, |
| 6.918352 |         |            | 6.912472 |         |            | 6.906591 |         |            |
| 18453,   | 230384, | 2768.3445, | 18491,   | 229922, | 2765.9913, | 18529,   | 229760, | 2763.6380, |
| 6.918198 |         |            | 6.912317 |         |            | 6.906436 |         |            |
| 18454,   | 230346, | 2768.2825, | 18492,   | 231152, | 2765.9293, | 18530,   | 229128, | 2763.5761, |
| 6.918043 |         |            | 6.912162 |         |            | 6.906281 |         |            |
| 18455,   | 230354, | 2768.2206, | 18493,   | 232410, | 2765.8674, | 18531,   | 229076, | 2763.5142, |
| 6.917888 |         |            | 6.912007 |         |            | 6.906127 |         |            |
| 18456,   | 230304, | 2768.1587, | 18494,   | 233290, | 2765.8055, | 18532,   | 229350, | 2763.4523, |
| 6.917733 |         |            | 6.911853 |         |            | 6.905972 |         |            |
| 18457,   | 229948, | 2768.0968, | 18495,   | 233506, | 2765.7435, | 18533,   | 229400, | 2763.3903, |
| 6.917579 |         |            | 6.911698 |         |            | 6.905817 |         |            |
| 18458,   | 229308, | 2768.0348, | 18496,   | 233162, | 2765.6816, | 18534,   | 228930, | 2763.3284, |
| 6.917424 |         |            | 6.911543 |         |            | 6.905662 |         |            |
| 18459,   | 228704, | 2767.9729, | 18497,   | 232694, | 2765.6197, | 18535,   | 228206, | 2763.2665, |
| 6.917269 |         |            | 6.911388 |         |            | 6.905508 |         |            |
| 18460,   | 228470, | 2767.9110, | 18498,   | 232524, | 2765.5578, | 18536,   | 227762, | 2763.2045, |
| 6.917114 |         |            | 6.911234 |         |            | 6.905353 |         |            |
| 18461,   | 228562, | 2767.8491, | 18499,   | 232680, | 2765.4958, | 18537,   | 227868, | 2763.1426, |
| 6.916960 |         |            | 6.911079 |         |            | 6.905198 |         |            |
| 18462,   | 228640, | 2767.7871, | 18500,   | 232806, | 2765.4339, | 18538,   | 228376, | 2763.0807, |
| 6.916805 |         |            | 6.910924 |         |            | 6.905043 |         |            |
| 18463,   | 228500, | 2767.7252, | 18501,   | 232564, | 2765.3720, | 18539,   | 228980, | 2763.0188, |
| 6.916650 |         |            | 6.910769 |         |            | 6.904889 |         |            |
| 18464,   | 228358, | 2767.6633, | 18502,   | 231980, | 2765.3101, | 18540,   | 229578, | 2762.9568, |
| 6.916495 |         |            | 6.910615 |         |            | 6.904734 |         |            |
| 18465,   | 228610, | 2767.6014, | 18503,   | 231420, | 2765.2481, | 18541,   | 230250, | 2762.8949, |
| 6.916341 |         |            | 6.910460 |         |            | 6.904579 |         |            |
| 18466,   | 229276, | 2767.5394, | 18504,   | 231232, | 2765.1862, | 18542,   | 230972, | 2762.8330, |
| 6.916186 |         |            | 6.910305 |         |            | 6.904424 |         |            |
| 18467,   | 229854, | 2767.4775, | 18505,   | 231436, | 2765.1243, | 18543,   | 231484, | 2762.7711, |
| 6.916031 |         |            | 6.910150 |         |            | 6.904269 |         |            |
| 18468,   | 229738, | 2767.4156, | 18506,   | 231796, | 2765.0624, | 18544,   | 231528, | 2762.7091, |
| 6.915876 |         |            | 6.909996 |         |            | 6.904115 |         |            |
| 18469,   | 228898, | 2767.3536, | 18507,   | 232110, | 2765.0004, | 18545,   | 231186, | 2762.6472, |
| 6.915722 |         |            | 6.909841 |         |            | 6.903960 |         |            |
| 18470,   | 228000, | 2767.2917, | 18508,   | 232354, | 2764.9385, | 18546,   | 230868, | 2762.5853, |
| 6.915567 |         |            | 6.909686 |         |            | 6.903805 |         |            |
| 18471,   | 227822, | 2767.2298, | 18509,   | 232610, | 2764.8766, | 18547,   | 230916, | 2762.5233, |
| 6.915412 |         |            | 6.909531 |         |            | 6.903650 |         |            |
| 18472,   | 228502, | 2767.1679, | 18510,   | 232880, | 2764.8146, | 18548,   | 231238, | 2762.4614, |
| 6.915257 |         |            | 6.909376 |         |            | 6.903496 |         |            |
| 18473,   | 229404, | 2767.1059, | 18511,   | 233088, | 2764.7527, | 18549,   | 231408, | 2762.3995, |
| 6.915103 |         |            | 6.909222 |         |            | 6.903341 |         |            |
| 18474,   | 229744, | 2767.0440, | 18512,   | 233196, | 2764.6908, | 18550,   | 231198, | 2762.3376, |
| 6.914948 |         |            | 6.909067 |         |            | 6.903186 |         |            |
| 18475,   | 229304, | 2766.9821, | 18513,   | 233268, | 2764.6289, | 18551,   | 230856, | 2762.2756, |
| 6.914793 |         |            | 6.908912 |         |            | 6.903031 |         |            |
| 18476,   | 228548, | 2766.9202, | 18514,   | 233296, | 2764.5669, | 18552,   | 230914, | 2762.2137, |
| 6.914638 |         |            | 6.908757 |         |            | 6.902877 |         |            |

|          |         |            |          |         |            |          |         |            |
|----------|---------|------------|----------|---------|------------|----------|---------|------------|
| 18553,   | 231614, | 2762.1518, | 18591,   | 233482, | 2759.7986, | 18629,   | 231358, | 2757.4453, |
| 6.902722 |         |            | 6.896841 |         |            | 6.890960 |         |            |
| 18554,   | 232656, | 2762.0899, | 18592,   | 233746, | 2759.7366, | 18630,   | 231742, | 2757.3834, |
| 6.902567 |         |            | 6.896686 |         |            | 6.890806 |         |            |
| 18555,   | 233440, | 2762.0279, | 18593,   | 233580, | 2759.6747, | 18631,   | 232062, | 2757.3215, |
| 6.902412 |         |            | 6.896532 |         |            | 6.890651 |         |            |
| 18556,   | 233568, | 2761.9660, | 18594,   | 232956, | 2759.6128, | 18632,   | 232174, | 2757.2596, |
| 6.902258 |         |            | 6.896377 |         |            | 6.890496 |         |            |
| 18557,   | 233112, | 2761.9041, | 18595,   | 232248, | 2759.5509, | 18633,   | 232308, | 2757.1976, |
| 6.902103 |         |            | 6.896222 |         |            | 6.890341 |         |            |
| 18558,   | 232392, | 2761.8422, | 18596,   | 231798, | 2759.4889, | 18634,   | 232752, | 2757.1357, |
| 6.901948 |         |            | 6.896067 |         |            | 6.890187 |         |            |
| 18559,   | 231664, | 2761.7802, | 18597,   | 231602, | 2759.4270, | 18635,   | 233462, | 2757.0738, |
| 6.901793 |         |            | 6.895913 |         |            | 6.890032 |         |            |
| 18560,   | 231022, | 2761.7183, | 18598,   | 231366, | 2759.3651, | 18636,   | 234102, | 2757.0119, |
| 6.901639 |         |            | 6.895758 |         |            | 6.889877 |         |            |
| 18561,   | 230558, | 2761.6564, | 18599,   | 230934, | 2759.3031, | 18637,   | 234350, | 2756.9499, |
| 6.901484 |         |            | 6.895603 |         |            | 6.889722 |         |            |
| 18562,   | 230452, | 2761.5944, | 18600,   | 230456, | 2759.2412, | 18638,   | 234174, | 2756.8880, |
| 6.901329 |         |            | 6.895448 |         |            | 6.889568 |         |            |
| 18563,   | 230806, | 2761.5325, | 18601,   | 230172, | 2759.1793, | 18639,   | 233760, | 2756.8261, |
| 6.901174 |         |            | 6.895294 |         |            | 6.889413 |         |            |
| 18564,   | 231462, | 2761.4706, | 18602,   | 230070, | 2759.1174, | 18640,   | 233244, | 2756.7641, |
| 6.901020 |         |            | 6.895139 |         |            | 6.889258 |         |            |
| 18565,   | 232048, | 2761.4087, | 18603,   | 229914, | 2759.0554, | 18641,   | 232624, | 2756.7022, |
| 6.900865 |         |            | 6.894984 |         |            | 6.889103 |         |            |
| 18566,   | 232308, | 2761.3467, | 18604,   | 229578, | 2758.9935, | 18642,   | 231938, | 2756.6403, |
| 6.900710 |         |            | 6.894829 |         |            | 6.888948 |         |            |
| 18567,   | 232350, | 2761.2848, | 18605,   | 229294, | 2758.9316, | 18643,   | 231402, | 2756.5784, |
| 6.900555 |         |            | 6.894675 |         |            | 6.888794 |         |            |
| 18568,   | 232476, | 2761.2229, | 18606,   | 229458, | 2758.8697, | 18644,   | 231324, | 2756.5164, |
| 6.900401 |         |            | 6.894520 |         |            | 6.888639 |         |            |
| 18569,   | 232832, | 2761.1610, | 18607,   | 230144, | 2758.8077, | 18645,   | 231798, | 2756.4545, |
| 6.900246 |         |            | 6.894365 |         |            | 6.888484 |         |            |
| 18570,   | 233220, | 2761.0990, | 18608,   | 230960, | 2758.7458, | 18646,   | 232580, | 2756.3926, |
| 6.900091 |         |            | 6.894210 |         |            | 6.888329 |         |            |
| 18571,   | 233314, | 2761.0371, | 18609,   | 231386, | 2758.6839, | 18647,   | 233280, | 2756.3307, |
| 6.899936 |         |            | 6.894055 |         |            | 6.888175 |         |            |
| 18572,   | 233036, | 2760.9752, | 18610,   | 231302, | 2758.6220, | 18648,   | 233704, | 2756.2687, |
| 6.899782 |         |            | 6.893901 |         |            | 6.888020 |         |            |
| 18573,   | 232620, | 2760.9132, | 18611,   | 231066, | 2758.5600, | 18649,   | 233908, | 2756.2068, |
| 6.899627 |         |            | 6.893746 |         |            | 6.887865 |         |            |
| 18574,   | 232334, | 2760.8513, | 18612,   | 231140, | 2758.4981, | 18650,   | 234018, | 2756.1449, |
| 6.899472 |         |            | 6.893591 |         |            | 6.887710 |         |            |
| 18575,   | 232208, | 2760.7894, | 18613,   | 231606, | 2758.4362, | 18651,   | 234062, | 2756.0829, |
| 6.899317 |         |            | 6.893436 |         |            | 6.887556 |         |            |
| 18576,   | 232110, | 2760.7275, | 18614,   | 232180, | 2758.3742, | 18652,   | 234002, | 2756.0210, |
| 6.899162 |         |            | 6.893282 |         |            | 6.887401 |         |            |
| 18577,   | 232004, | 2760.6655, | 18615,   | 232604, | 2758.3123, | 18653,   | 233928, | 2755.9591, |
| 6.899008 |         |            | 6.893127 |         |            | 6.887246 |         |            |
| 18578,   | 232108, | 2760.6036, | 18616,   | 232944, | 2758.2504, | 18654,   | 234066, | 2755.8972, |
| 6.898853 |         |            | 6.892972 |         |            | 6.887091 |         |            |
| 18579,   | 232604, | 2760.5417, | 18617,   | 233410, | 2758.1885, | 18655,   | 234518, | 2755.8352, |
| 6.898698 |         |            | 6.892817 |         |            | 6.886937 |         |            |
| 18580,   | 233310, | 2760.4798, | 18618,   | 233954, | 2758.1265, | 18656,   | 235062, | 2755.7733, |
| 6.898543 |         |            | 6.892663 |         |            | 6.886782 |         |            |
| 18581,   | 233720, | 2760.4178, | 18619,   | 234188, | 2758.0646, | 18657,   | 235324, | 2755.7114, |
| 6.898389 |         |            | 6.892508 |         |            | 6.886627 |         |            |
| 18582,   | 233478, | 2760.3559, | 18620,   | 233766, | 2758.0027, | 18658,   | 235166, | 2755.6495, |
| 6.898234 |         |            | 6.892353 |         |            | 6.886472 |         |            |
| 18583,   | 232768, | 2760.2940, | 18621,   | 232846, | 2757.9408, | 18659,   | 234892, | 2755.5875, |
| 6.898079 |         |            | 6.892198 |         |            | 6.886318 |         |            |
| 18584,   | 232204, | 2760.2321, | 18622,   | 232032, | 2757.8788, | 18660,   | 234956, | 2755.5256, |
| 6.897924 |         |            | 6.892044 |         |            | 6.886163 |         |            |
| 18585,   | 232242, | 2760.1701, | 18623,   | 231822, | 2757.8169, | 18661,   | 235462, | 2755.4637, |
| 6.897770 |         |            | 6.891889 |         |            | 6.886008 |         |            |
| 18586,   | 232752, | 2760.1082, | 18624,   | 232122, | 2757.7550, | 18662,   | 235986, | 2755.4018, |
| 6.897615 |         |            | 6.891734 |         |            | 6.885853 |         |            |
| 18587,   | 233222, | 2760.0463, | 18625,   | 232390, | 2757.6930, | 18663,   | 236034, | 2755.3398, |
| 6.897460 |         |            | 6.891579 |         |            | 6.885699 |         |            |
| 18588,   | 233306, | 2759.9843, | 18626,   | 232192, | 2757.6311, | 18664,   | 235564, | 2755.2779, |
| 6.897305 |         |            | 6.891425 |         |            | 6.885544 |         |            |
| 18589,   | 233164, | 2759.9224, | 18627,   | 231660, | 2757.5692, | 18665,   | 235068, | 2755.2160, |
| 6.897151 |         |            | 6.891270 |         |            | 6.885389 |         |            |
| 18590,   | 233180, | 2759.8605, | 18628,   | 231278, | 2757.5073, | 18666,   | 235046, | 2755.1540, |
| 6.896996 |         |            | 6.891115 |         |            | 6.885234 |         |            |

|          |         |            |          |         |            |          |         |            |
|----------|---------|------------|----------|---------|------------|----------|---------|------------|
| 18667,   | 235446, | 2755.0921, | 18705,   | 234376, | 2752.7389, | 18743,   | 233504, | 2750.3857, |
| 6.885080 |         |            | 6.879199 |         |            | 6.873318 |         |            |
| 18668,   | 235690, | 2755.0302, | 18706,   | 234642, | 2752.6770, | 18744,   | 233218, | 2750.3237, |
| 6.884925 |         |            | 6.879044 |         |            | 6.873163 |         |            |
| 18669,   | 235278, | 2754.9683, | 18707,   | 234376, | 2752.6150, | 18745,   | 233030, | 2750.2618, |
| 6.884770 |         |            | 6.878889 |         |            | 6.873008 |         |            |
| 18670,   | 234314, | 2754.9063, | 18708,   | 233830, | 2752.5531, | 18746,   | 232942, | 2750.1999, |
| 6.884615 |         |            | 6.878734 |         |            | 6.872854 |         |            |
| 18671,   | 233396, | 2754.8444, | 18709,   | 233472, | 2752.4912, | 18747,   | 233168, | 2750.1380, |
| 6.884461 |         |            | 6.878580 |         |            | 6.872699 |         |            |
| 18672,   | 233050, | 2754.7825, | 18710,   | 233460, | 2752.4293, | 18748,   | 233808, | 2750.0760, |
| 6.884306 |         |            | 6.878425 |         |            | 6.872544 |         |            |
| 18673,   | 233282, | 2754.7206, | 18711,   | 233486, | 2752.3673, | 18749,   | 234628, | 2750.0141, |
| 6.884151 |         |            | 6.878270 |         |            | 6.872389 |         |            |
| 18674,   | 233736, | 2754.6586, | 18712,   | 233198, | 2752.3054, | 18750,   | 235218, | 2749.9522, |
| 6.883996 |         |            | 6.878115 |         |            | 6.872235 |         |            |
| 18675,   | 234146, | 2754.5967, | 18713,   | 232698, | 2752.2435, | 18751,   | 235378, | 2749.8903, |
| 6.883841 |         |            | 6.877961 |         |            | 6.872080 |         |            |
| 18676,   | 234552, | 2754.5348, | 18714,   | 232500, | 2752.1816, | 18752,   | 235336, | 2749.8283, |
| 6.883687 |         |            | 6.877806 |         |            | 6.871925 |         |            |
| 18677,   | 235062, | 2754.4728, | 18715,   | 232964, | 2752.1196, | 18753,   | 235460, | 2749.7664, |
| 6.883532 |         |            | 6.877651 |         |            | 6.871770 |         |            |
| 18678,   | 235524, | 2754.4109, | 18716,   | 233836, | 2752.0577, | 18754,   | 235906, | 2749.7045, |
| 6.883377 |         |            | 6.877496 |         |            | 6.871616 |         |            |
| 18679,   | 235566, | 2754.3490, | 18717,   | 234468, | 2751.9958, | 18755,   | 236506, | 2749.6426, |
| 6.883222 |         |            | 6.877342 |         |            | 6.871461 |         |            |
| 18680,   | 234990, | 2754.2871, | 18718,   | 234482, | 2751.9338, | 18756,   | 237032, | 2749.5806, |
| 6.883068 |         |            | 6.877187 |         |            | 6.871306 |         |            |
| 18681,   | 234062, | 2754.2251, | 18719,   | 234154, | 2751.8719, | 18757,   | 237476, | 2749.5187, |
| 6.882913 |         |            | 6.877032 |         |            | 6.871151 |         |            |
| 18682,   | 233300, | 2754.1632, | 18720,   | 234078, | 2751.8100, | 18758,   | 238024, | 2749.4568, |
| 6.882758 |         |            | 6.876877 |         |            | 6.870997 |         |            |
| 18683,   | 233012, | 2754.1013, | 18721,   | 234514, | 2751.7481, | 18759,   | 238804, | 2749.3948, |
| 6.882603 |         |            | 6.876723 |         |            | 6.870842 |         |            |
| 18684,   | 233042, | 2754.0394, | 18722,   | 235088, | 2751.6861, | 18760,   | 239670, | 2749.3329, |
| 6.882449 |         |            | 6.876568 |         |            | 6.870687 |         |            |
| 18685,   | 233046, | 2753.9774, | 18723,   | 235240, | 2751.6242, | 18761,   | 240358, | 2749.2710, |
| 6.882294 |         |            | 6.876413 |         |            | 6.870532 |         |            |
| 18686,   | 232888, | 2753.9155, | 18724,   | 234850, | 2751.5623, | 18762,   | 240736, | 2749.2091, |
| 6.882139 |         |            | 6.876258 |         |            | 6.870378 |         |            |
| 18687,   | 232748, | 2753.8536, | 18725,   | 234378, | 2751.5004, | 18763,   | 240854, | 2749.1471, |
| 6.881984 |         |            | 6.876104 |         |            | 6.870223 |         |            |
| 18688,   | 232814, | 2753.7917, | 18726,   | 234368, | 2751.4384, | 18764,   | 240822, | 2749.0852, |
| 6.881830 |         |            | 6.875949 |         |            | 6.870068 |         |            |
| 18689,   | 233008, | 2753.7297, | 18727,   | 234874, | 2751.3765, | 18765,   | 240620, | 2749.0233, |
| 6.881675 |         |            | 6.875794 |         |            | 6.869913 |         |            |
| 18690,   | 233038, | 2753.6678, | 18728,   | 235464, | 2751.3146, | 18766,   | 240176, | 2748.9614, |
| 6.881520 |         |            | 6.875639 |         |            | 6.869759 |         |            |
| 18691,   | 232810, | 2753.6059, | 18729,   | 235738, | 2751.2527, | 18767,   | 239542, | 2748.8994, |
| 6.881365 |         |            | 6.875485 |         |            | 6.869604 |         |            |
| 18692,   | 232574, | 2753.5439, | 18730,   | 235740, | 2751.1907, | 18768,   | 238956, | 2748.8375, |
| 6.881211 |         |            | 6.875330 |         |            | 6.869449 |         |            |
| 18693,   | 232708, | 2753.4820, | 18731,   | 235824, | 2751.1288, | 18769,   | 238638, | 2748.7756, |
| 6.881056 |         |            | 6.875175 |         |            | 6.869294 |         |            |
| 18694,   | 233322, | 2753.4201, | 18732,   | 236160, | 2751.0669, | 18770,   | 238548, | 2748.7136, |
| 6.880901 |         |            | 6.875020 |         |            | 6.869139 |         |            |
| 18695,   | 234146, | 2753.3582, | 18733,   | 236540, | 2751.0049, | 18771,   | 238416, | 2748.6517, |
| 6.880746 |         |            | 6.874866 |         |            | 6.868985 |         |            |
| 18696,   | 234822, | 2753.2962, | 18734,   | 236638, | 2750.9430, | 18772,   | 237980, | 2748.5898, |
| 6.880592 |         |            | 6.874711 |         |            | 6.868830 |         |            |
| 18697,   | 235202, | 2753.2343, | 18735,   | 236446, | 2750.8811, | 18773,   | 237266, | 2748.5279, |
| 6.880437 |         |            | 6.874556 |         |            | 6.868675 |         |            |
| 18698,   | 235378, | 2753.1724, | 18736,   | 236298, | 2750.8192, | 18774,   | 236506, | 2748.4659, |
| 6.880282 |         |            | 6.874401 |         |            | 6.868520 |         |            |
| 18699,   | 235398, | 2753.1105, | 18737,   | 236456, | 2750.7572, | 18775,   | 235894, | 2748.4040, |
| 6.880127 |         |            | 6.874247 |         |            | 6.868366 |         |            |
| 18700,   | 235170, | 2753.0485, | 18738,   | 236756, | 2750.6953, | 18776,   | 235436, | 2748.3421, |
| 6.879973 |         |            | 6.874092 |         |            | 6.868211 |         |            |
| 18701,   | 234610, | 2752.9866, | 18739,   | 236736, | 2750.6334, | 18777,   | 235046, | 2748.2802, |
| 6.879818 |         |            | 6.873937 |         |            | 6.868056 |         |            |
| 18702,   | 233958, | 2752.9247, | 18740,   | 236106, | 2750.5715, | 18778,   | 234728, | 2748.2182, |
| 6.879663 |         |            | 6.873782 |         |            | 6.867901 |         |            |
| 18703,   | 233626, | 2752.8627, | 18741,   | 235066, | 2750.5095, | 18779,   | 234572, | 2748.1563, |
| 6.879508 |         |            | 6.873627 |         |            | 6.867747 |         |            |
| 18704,   | 233858, | 2752.8008, | 18742,   | 234096, | 2750.4476, | 18780,   | 234586, | 2748.0944, |
| 6.879354 |         |            | 6.873473 |         |            | 6.867592 |         |            |



|          |         |            |          |         |            |          |         |            |
|----------|---------|------------|----------|---------|------------|----------|---------|------------|
| 18781,   | 234580, | 2748.0325, | 18819,   | 233802, | 2745.6792, | 18857,   | 235268, | 2743.3260, |
| 6.867437 |         |            | 6.861556 |         |            | 6.855676 |         |            |
| 18782,   | 234388, | 2747.9705, | 18820,   | 234344, | 2745.6173, | 18858,   | 235474, | 2743.2641, |
| 6.867282 |         |            | 6.861402 |         |            | 6.855521 |         |            |
| 18783,   | 234080, | 2747.9086, | 18821,   | 234666, | 2745.5554, | 18859,   | 235094, | 2743.2022, |
| 6.867128 |         |            | 6.861247 |         |            | 6.855366 |         |            |
| 18784,   | 233990, | 2747.8467, | 18822,   | 234850, | 2745.4934, | 18860,   | 234502, | 2743.1402, |
| 6.866973 |         |            | 6.861092 |         |            | 6.855211 |         |            |
| 18785,   | 234340, | 2747.7847, | 18823,   | 235006, | 2745.4315, | 18861,   | 234226, | 2743.0783, |
| 6.866818 |         |            | 6.860937 |         |            | 6.855057 |         |            |
| 18786,   | 234926, | 2747.7228, | 18824,   | 235114, | 2745.3696, | 18862,   | 234394, | 2743.0164, |
| 6.866663 |         |            | 6.860783 |         |            | 6.854902 |         |            |
| 18787,   | 235228, | 2747.6609, | 18825,   | 235042, | 2745.3077, | 18863,   | 234684, | 2742.9544, |
| 6.866509 |         |            | 6.860628 |         |            | 6.854747 |         |            |
| 18788,   | 234886, | 2747.5990, | 18826,   | 234746, | 2745.2457, | 18864,   | 234752, | 2742.8925, |
| 6.866354 |         |            | 6.860473 |         |            | 6.854592 |         |            |
| 18789,   | 234098, | 2747.5370, | 18827,   | 234456, | 2745.1838, | 18865,   | 234618, | 2742.8306, |
| 6.866199 |         |            | 6.860318 |         |            | 6.854438 |         |            |
| 18790,   | 233468, | 2747.4751, | 18828,   | 234506, | 2745.1219, | 18866,   | 234604, | 2742.7687, |
| 6.866044 |         |            | 6.860164 |         |            | 6.854283 |         |            |
| 18791,   | 233460, | 2747.4132, | 18829,   | 235046, | 2745.0600, | 18867,   | 234902, | 2742.7067, |
| 6.865890 |         |            | 6.860009 |         |            | 6.854128 |         |            |
| 18792,   | 233996, | 2747.3513, | 18830,   | 235858, | 2744.9980, | 18868,   | 235346, | 2742.6448, |
| 6.865735 |         |            | 6.859854 |         |            | 6.853973 |         |            |
| 18793,   | 234604, | 2747.2893, | 18831,   | 236558, | 2744.9361, | 18869,   | 235600, | 2742.5829, |
| 6.865580 |         |            | 6.859699 |         |            | 6.853818 |         |            |
| 18794,   | 234912, | 2747.2274, | 18832,   | 236920, | 2744.8742, | 18870,   | 235566, | 2742.5210, |
| 6.865425 |         |            | 6.859545 |         |            | 6.853664 |         |            |
| 18795,   | 234956, | 2747.1655, | 18833,   | 237016, | 2744.8123, | 18871,   | 235456, | 2742.4590, |
| 6.865271 |         |            | 6.859390 |         |            | 6.853509 |         |            |
| 18796,   | 235024, | 2747.1035, | 18834,   | 237060, | 2744.7503, | 18872,   | 235522, | 2742.3971, |
| 6.865116 |         |            | 6.859235 |         |            | 6.853354 |         |            |
| 18797,   | 235254, | 2747.0416, | 18835,   | 237152, | 2744.6884, | 18873,   | 235738, | 2742.3352, |
| 6.864961 |         |            | 6.859080 |         |            | 6.853199 |         |            |
| 18798,   | 235516, | 2746.9797, | 18836,   | 237236, | 2744.6265, | 18874,   | 235830, | 2742.2732, |
| 6.864806 |         |            | 6.858925 |         |            | 6.853045 |         |            |
| 18799,   | 235622, | 2746.9178, | 18837,   | 237202, | 2744.5645, | 18875,   | 235622, | 2742.2113, |
| 6.864652 |         |            | 6.858771 |         |            | 6.852890 |         |            |
| 18800,   | 235624, | 2746.8558, | 18838,   | 237012, | 2744.5026, | 18876,   | 235246, | 2742.1494, |
| 6.864497 |         |            | 6.858616 |         |            | 6.852735 |         |            |
| 18801,   | 235742, | 2746.7939, | 18839,   | 236680, | 2744.4407, | 18877,   | 234976, | 2742.0875, |
| 6.864342 |         |            | 6.858461 |         |            | 6.852580 |         |            |
| 18802,   | 236048, | 2746.7320, | 18840,   | 236172, | 2744.3788, | 18878,   | 234920, | 2742.0255, |
| 6.864187 |         |            | 6.858306 |         |            | 6.852426 |         |            |
| 18803,   | 236292, | 2746.6701, | 18841,   | 235468, | 2744.3168, | 18879,   | 234920, | 2741.9636, |
| 6.864032 |         |            | 6.858152 |         |            | 6.852271 |         |            |
| 18804,   | 236138, | 2746.6081, | 18842,   | 234692, | 2744.2549, | 18880,   | 234790, | 2741.9017, |
| 6.863878 |         |            | 6.857997 |         |            | 6.852116 |         |            |
| 18805,   | 235530, | 2746.5462, | 18843,   | 234116, | 2744.1930, | 18881,   | 234580, | 2741.8398, |
| 6.863723 |         |            | 6.857842 |         |            | 6.851961 |         |            |
| 18806,   | 234838, | 2746.4843, | 18844,   | 233954, | 2744.1311, | 18882,   | 234532, | 2741.7778, |
| 6.863568 |         |            | 6.857687 |         |            | 6.851807 |         |            |
| 18807,   | 234510, | 2746.4224, | 18845,   | 234148, | 2744.0691, | 18883,   | 234786, | 2741.7159, |
| 6.863413 |         |            | 6.857533 |         |            | 6.851652 |         |            |
| 18808,   | 234628, | 2746.3604, | 18846,   | 234388, | 2744.0072, | 18884,   | 235228, | 2741.6540, |
| 6.863259 |         |            | 6.857378 |         |            | 6.851497 |         |            |
| 18809,   | 234856, | 2746.2985, | 18847,   | 234462, | 2743.9453, | 18885,   | 235610, | 2741.5921, |
| 6.863104 |         |            | 6.857223 |         |            | 6.851342 |         |            |
| 18810,   | 234752, | 2746.2366, | 18848,   | 234496, | 2743.8833, | 18886,   | 235916, | 2741.5301, |
| 6.862949 |         |            | 6.857068 |         |            | 6.851188 |         |            |
| 18811,   | 234198, | 2746.1746, | 18849,   | 234806, | 2743.8214, | 18887,   | 236390, | 2741.4682, |
| 6.862794 |         |            | 6.856914 |         |            | 6.851033 |         |            |
| 18812,   | 233434, | 2746.1127, | 18850,   | 235476, | 2743.7595, | 18888,   | 237238, | 2741.4063, |
| 6.862640 |         |            | 6.856759 |         |            | 6.850878 |         |            |
| 18813,   | 232798, | 2746.0508, | 18851,   | 236124, | 2743.6976, | 18889,   | 238334, | 2741.3443, |
| 6.862485 |         |            | 6.856604 |         |            | 6.850723 |         |            |
| 18814,   | 232426, | 2745.9889, | 18852,   | 236212, | 2743.6356, | 18890,   | 239228, | 2741.2824, |
| 6.862330 |         |            | 6.856449 |         |            | 6.850569 |         |            |
| 18815,   | 232288, | 2745.9269, | 18853,   | 235600, | 2743.5737, | 18891,   | 239510, | 2741.2205, |
| 6.862175 |         |            | 6.856295 |         |            | 6.850414 |         |            |
| 18816,   | 232338, | 2745.8650, | 18854,   | 234762, | 2743.5118, | 18892,   | 239112, | 2741.1586, |
| 6.862021 |         |            | 6.856140 |         |            | 6.850259 |         |            |
| 18817,   | 232624, | 2745.8031, | 18855,   | 234380, | 2743.4499, | 18893,   | 238266, | 2741.0966, |
| 6.861866 |         |            | 6.855985 |         |            | 6.850104 |         |            |
| 18818,   | 233158, | 2745.7412, | 18856,   | 234690, | 2743.3879, | 18894,   | 237224, | 2741.0347, |
| 6.861711 |         |            | 6.855830 |         |            | 6.849950 |         |            |

|          |         |            |          |         |            |          |         |            |
|----------|---------|------------|----------|---------|------------|----------|---------|------------|
| 18895,   | 236094, | 2740.9728, | 18933,   | 235852, | 2738.6196, | 18971,   | 237910, | 2736.2663, |
| 6.849795 |         |            | 6.843914 |         |            | 6.838033 |         |            |
| 18896,   | 234944, | 2740.9109, | 18934,   | 236060, | 2738.5576, | 18972,   | 237974, | 2736.2044, |
| 6.849640 |         |            | 6.843759 |         |            | 6.837878 |         |            |
| 18897,   | 233954, | 2740.8489, | 18935,   | 235830, | 2738.4957, | 18973,   | 237908, | 2736.1425, |
| 6.849485 |         |            | 6.843604 |         |            | 6.837724 |         |            |
| 18898,   | 233338, | 2740.7870, | 18936,   | 235714, | 2738.4338, | 18974,   | 237954, | 2736.0806, |
| 6.849331 |         |            | 6.843450 |         |            | 6.837569 |         |            |
| 18899,   | 233098, | 2740.7251, | 18937,   | 236210, | 2738.3719, | 18975,   | 238248, | 2736.0186, |
| 6.849176 |         |            | 6.843295 |         |            | 6.837414 |         |            |
| 18900,   | 232972, | 2740.6631, | 18938,   | 237182, | 2738.3099, | 18976,   | 238508, | 2735.9567, |
| 6.849021 |         |            | 6.843140 |         |            | 6.837259 |         |            |
| 18901,   | 232668, | 2740.6012, | 18939,   | 237986, | 2738.2480, | 18977,   | 238306, | 2735.8948, |
| 6.848866 |         |            | 6.842985 |         |            | 6.837105 |         |            |
| 18902,   | 232236, | 2740.5393, | 18940,   | 238124, | 2738.1861, | 18978,   | 237580, | 2735.8329, |
| 6.848711 |         |            | 6.842831 |         |            | 6.836950 |         |            |
| 18903,   | 232038, | 2740.4774, | 18941,   | 237772, | 2738.1241, | 18979,   | 236834, | 2735.7709, |
| 6.848557 |         |            | 6.842676 |         |            | 6.836795 |         |            |
| 18904,   | 232354, | 2740.4154, | 18942,   | 237568, | 2738.0622, | 18980,   | 236724, | 2735.7090, |
| 6.848402 |         |            | 6.842521 |         |            | 6.836640 |         |            |
| 18905,   | 233012, | 2740.3535, | 18943,   | 237982, | 2738.0003, | 18981,   | 237434, | 2735.6471, |
| 6.848247 |         |            | 6.842366 |         |            | 6.836486 |         |            |
| 18906,   | 233512, | 2740.2916, | 18944,   | 238886, | 2737.9384, | 18982,   | 238482, | 2735.5851, |
| 6.848092 |         |            | 6.842212 |         |            | 6.836331 |         |            |
| 18907,   | 233538, | 2740.2297, | 18945,   | 239716, | 2737.8764, | 18983,   | 239196, | 2735.5232, |
| 6.847938 |         |            | 6.842057 |         |            | 6.836176 |         |            |
| 18908,   | 233302, | 2740.1677, | 18946,   | 240036, | 2737.8145, | 18984,   | 239350, | 2735.4613, |
| 6.847783 |         |            | 6.841902 |         |            | 6.836021 |         |            |
| 18909,   | 233324, | 2740.1058, | 18947,   | 239844, | 2737.7526, | 18985,   | 239310, | 2735.3994, |
| 6.847628 |         |            | 6.841747 |         |            | 6.835867 |         |            |
| 18910,   | 233858, | 2740.0439, | 18948,   | 239432, | 2737.6907, | 18986,   | 239582, | 2735.3374, |
| 6.847473 |         |            | 6.841593 |         |            | 6.835712 |         |            |
| 18911,   | 234610, | 2739.9820, | 18949,   | 239028, | 2737.6287, | 18987,   | 240286, | 2735.2755, |
| 6.847319 |         |            | 6.841438 |         |            | 6.835557 |         |            |
| 18912,   | 235094, | 2739.9200, | 18950,   | 238702, | 2737.5668, | 18988,   | 241072, | 2735.2136, |
| 6.847164 |         |            | 6.841283 |         |            | 6.835402 |         |            |
| 18913,   | 235174, | 2739.8581, | 18951,   | 238476, | 2737.5049, | 18989,   | 241528, | 2735.1517, |
| 6.847009 |         |            | 6.841128 |         |            | 6.835248 |         |            |
| 18914,   | 235226, | 2739.7962, | 18952,   | 238448, | 2737.4430, | 18990,   | 241578, | 2735.0897, |
| 6.846854 |         |            | 6.840974 |         |            | 6.835093 |         |            |
| 18915,   | 235660, | 2739.7342, | 18953,   | 238678, | 2737.3810, | 18991,   | 241454, | 2735.0278, |
| 6.846700 |         |            | 6.840819 |         |            | 6.834938 |         |            |
| 18916,   | 236416, | 2739.6723, | 18954,   | 239016, | 2737.3191, | 18992,   | 241404, | 2734.9659, |
| 6.846545 |         |            | 6.840664 |         |            | 6.834783 |         |            |
| 18917,   | 236952, | 2739.6104, | 18955,   | 239170, | 2737.2572, | 18993,   | 241416, | 2734.9039, |
| 6.846390 |         |            | 6.840509 |         |            | 6.834629 |         |            |
| 18918,   | 236814, | 2739.5485, | 18956,   | 238988, | 2737.1952, | 18994,   | 241334, | 2734.8420, |
| 6.846235 |         |            | 6.840355 |         |            | 6.834474 |         |            |
| 18919,   | 236136, | 2739.4865, | 18957,   | 238646, | 2737.1333, | 18995,   | 241112, | 2734.7801, |
| 6.846081 |         |            | 6.840200 |         |            | 6.834319 |         |            |
| 18920,   | 235524, | 2739.4246, | 18958,   | 238492, | 2737.0714, | 18996,   | 240892, | 2734.7182, |
| 6.845926 |         |            | 6.840045 |         |            | 6.834164 |         |            |
| 18921,   | 235476, | 2739.3627, | 18959,   | 238684, | 2737.0095, | 18997,   | 240816, | 2734.6562, |
| 6.845771 |         |            | 6.839890 |         |            | 6.834010 |         |            |
| 18922,   | 235948, | 2739.3008, | 18960,   | 239050, | 2736.9475, | 18998,   | 240838, | 2734.5943, |
| 6.845616 |         |            | 6.839736 |         |            | 6.833855 |         |            |
| 18923,   | 236490, | 2739.2388, | 18961,   | 239324, | 2736.8856, | 18999,   | 240756, | 2734.5324, |
| 6.845462 |         |            | 6.839581 |         |            | 6.833700 |         |            |
| 18924,   | 236744, | 2739.1769, | 18962,   | 239448, | 2736.8237, | 19000,   | 240418, | 2734.4705, |
| 6.845307 |         |            | 6.839426 |         |            | 6.833545 |         |            |
| 18925,   | 236708, | 2739.1150, | 18963,   | 239612, | 2736.7618, | 19001,   | 239886, | 2734.4085, |
| 6.845152 |         |            | 6.839271 |         |            | 6.833390 |         |            |
| 18926,   | 236530, | 2739.0531, | 18964,   | 239920, | 2736.6998, | 19002,   | 239356, | 2734.3466, |
| 6.844997 |         |            | 6.839117 |         |            | 6.833236 |         |            |
| 18927,   | 236218, | 2738.9911, | 18965,   | 240176, | 2736.6379, | 19003,   | 239022, | 2734.2847, |
| 6.844843 |         |            | 6.838962 |         |            | 6.833081 |         |            |
| 18928,   | 235662, | 2738.9292, | 18966,   | 240002, | 2736.5760, | 19004,   | 238950, | 2734.2228, |
| 6.844688 |         |            | 6.838807 |         |            | 6.832926 |         |            |
| 18929,   | 234930, | 2738.8673, | 18967,   | 239300, | 2736.5140, | 19005,   | 239142, | 2734.1608, |
| 6.844533 |         |            | 6.838652 |         |            | 6.832771 |         |            |
| 18930,   | 234410, | 2738.8053, | 18968,   | 238410, | 2736.4521, | 19006,   | 239514, | 2734.0989, |
| 6.844378 |         |            | 6.838497 |         |            | 6.832617 |         |            |
| 18931,   | 234500, | 2738.7434, | 18969,   | 237832, | 2736.3902, | 19007,   | 239924, | 2734.0370, |
| 6.844224 |         |            | 6.838343 |         |            | 6.832462 |         |            |
| 18932,   | 235160, | 2738.6815, | 18970,   | 237750, | 2736.3283, | 19008,   | 240124, | 2733.9750, |
| 6.844069 |         |            | 6.838188 |         |            | 6.832307 |         |            |

|          |         |            |          |         |            |          |         |            |
|----------|---------|------------|----------|---------|------------|----------|---------|------------|
| 19009,   | 239956, | 2733.9131, | 19047,   | 241244, | 2731.5599, | 19085,   | 238362, | 2729.2067, |
| 6.832152 |         |            | 6.826272 |         |            | 6.820391 |         |            |
| 19010,   | 239468, | 2733.8512, | 19048,   | 240052, | 2731.4980, | 19086,   | 238630, | 2729.1447, |
| 6.831998 |         |            | 6.826117 |         |            | 6.820236 |         |            |
| 19011,   | 238942, | 2733.7893, | 19049,   | 238904, | 2731.4360, | 19087,   | 238716, | 2729.0828, |
| 6.831843 |         |            | 6.825962 |         |            | 6.820081 |         |            |
| 19012,   | 238618, | 2733.7273, | 19050,   | 238326, | 2731.3741, | 19088,   | 238790, | 2729.0209, |
| 6.831688 |         |            | 6.825807 |         |            | 6.819927 |         |            |
| 19013,   | 238480, | 2733.6654, | 19051,   | 238406, | 2731.3122, | 19089,   | 238890, | 2728.9590, |
| 6.831533 |         |            | 6.825653 |         |            | 6.819772 |         |            |
| 19014,   | 238306, | 2733.6035, | 19052,   | 238700, | 2731.2503, | 19090,   | 238820, | 2728.8970, |
| 6.831379 |         |            | 6.825498 |         |            | 6.819617 |         |            |
| 19015,   | 237984, | 2733.5416, | 19053,   | 238672, | 2731.1883, | 19091,   | 238392, | 2728.8351, |
| 6.831224 |         |            | 6.825343 |         |            | 6.819462 |         |            |
| 19016,   | 237736, | 2733.4796, | 19054,   | 238184, | 2731.1264, | 19092,   | 237780, | 2728.7732, |
| 6.831069 |         |            | 6.825188 |         |            | 6.819308 |         |            |
| 19017,   | 237946, | 2733.4177, | 19055,   | 237570, | 2731.0645, | 19093,   | 237432, | 2728.7113, |
| 6.830914 |         |            | 6.825034 |         |            | 6.819153 |         |            |
| 19018,   | 238704, | 2733.3558, | 19056,   | 237226, | 2731.0026, | 19094,   | 237638, | 2728.6493, |
| 6.830760 |         |            | 6.824879 |         |            | 6.818998 |         |            |
| 19019,   | 239608, | 2733.2938, | 19057,   | 237182, | 2730.9406, | 19095,   | 238212, | 2728.5874, |
| 6.830605 |         |            | 6.824724 |         |            | 6.818843 |         |            |
| 19020,   | 240074, | 2733.2319, | 19058,   | 237156, | 2730.8787, | 19096,   | 238646, | 2728.5255, |
| 6.830450 |         |            | 6.824569 |         |            | 6.818688 |         |            |
| 19021,   | 239866, | 2733.1700, | 19059,   | 236958, | 2730.8168, | 19097,   | 238666, | 2728.4635, |
| 6.830295 |         |            | 6.824415 |         |            | 6.818534 |         |            |
| 19022,   | 239312, | 2733.1081, | 19060,   | 236722, | 2730.7548, | 19098,   | 238510, | 2728.4016, |
| 6.830141 |         |            | 6.824260 |         |            | 6.818379 |         |            |
| 19023,   | 238978, | 2733.0461, | 19061,   | 236738, | 2730.6929, | 19099,   | 238676, | 2728.3397, |
| 6.829986 |         |            | 6.824105 |         |            | 6.818224 |         |            |
| 19024,   | 239118, | 2732.9842, | 19062,   | 237080, | 2730.6310, | 19100,   | 239362, | 2728.2778, |
| 6.829831 |         |            | 6.823950 |         |            | 6.818069 |         |            |
| 19025,   | 239456, | 2732.9223, | 19063,   | 237486, | 2730.5691, | 19101,   | 240248, | 2728.2158, |
| 6.829676 |         |            | 6.823795 |         |            | 6.817915 |         |            |
| 19026,   | 239544, | 2732.8604, | 19064,   | 237670, | 2730.5071, | 19102,   | 240802, | 2728.1539, |
| 6.829522 |         |            | 6.823641 |         |            | 6.817760 |         |            |
| 19027,   | 239240, | 2732.7984, | 19065,   | 237658, | 2730.4452, | 19103,   | 240810, | 2728.0920, |
| 6.829367 |         |            | 6.823486 |         |            | 6.817605 |         |            |
| 19028,   | 238790, | 2732.7365, | 19066,   | 237762, | 2730.3833, | 19104,   | 240514, | 2728.0301, |
| 6.829212 |         |            | 6.823331 |         |            | 6.817450 |         |            |
| 19029,   | 238508, | 2732.6746, | 19067,   | 238194, | 2730.3214, | 19105,   | 240322, | 2727.9681, |
| 6.829057 |         |            | 6.823176 |         |            | 6.817296 |         |            |
| 19030,   | 238430, | 2732.6127, | 19068,   | 238812, | 2730.2594, | 19106,   | 240416, | 2727.9062, |
| 6.828903 |         |            | 6.823022 |         |            | 6.817141 |         |            |
| 19031,   | 238362, | 2732.5507, | 19069,   | 239282, | 2730.1975, | 19107,   | 240692, | 2727.8443, |
| 6.828748 |         |            | 6.822867 |         |            | 6.816986 |         |            |
| 19032,   | 238184, | 2732.4888, | 19070,   | 239448, | 2730.1356, | 19108,   | 240972, | 2727.7824, |
| 6.828593 |         |            | 6.822712 |         |            | 6.816831 |         |            |
| 19033,   | 238056, | 2732.4269, | 19071,   | 239472, | 2730.0736, | 19109,   | 241230, | 2727.7204, |
| 6.828438 |         |            | 6.822557 |         |            | 6.816677 |         |            |
| 19034,   | 238194, | 2732.3649, | 19072,   | 239572, | 2730.0117, | 19110,   | 241520, | 2727.6585, |
| 6.828283 |         |            | 6.822403 |         |            | 6.816522 |         |            |
| 19035,   | 238574, | 2732.3030, | 19073,   | 239690, | 2729.9498, | 19111,   | 241788, | 2727.5966, |
| 6.828129 |         |            | 6.822248 |         |            | 6.816367 |         |            |
| 19036,   | 238902, | 2732.2411, | 19074,   | 239522, | 2729.8879, | 19112,   | 241890, | 2727.5346, |
| 6.827974 |         |            | 6.822093 |         |            | 6.816212 |         |            |
| 19037,   | 238920, | 2732.1792, | 19075,   | 238926, | 2729.8259, | 19113,   | 241756, | 2727.4727, |
| 6.827819 |         |            | 6.821938 |         |            | 6.816058 |         |            |
| 19038,   | 238726, | 2732.1172, | 19076,   | 238188, | 2729.7640, | 19114,   | 241512, | 2727.4108, |
| 6.827664 |         |            | 6.821784 |         |            | 6.815903 |         |            |
| 19039,   | 238700, | 2732.0553, | 19077,   | 237804, | 2729.7021, | 19115,   | 241320, | 2727.3489, |
| 6.827510 |         |            | 6.821629 |         |            | 6.815748 |         |            |
| 19040,   | 239122, | 2731.9934, | 19078,   | 237980, | 2729.6402, | 19116,   | 241164, | 2727.2869, |
| 6.827355 |         |            | 6.821474 |         |            | 6.815593 |         |            |
| 19041,   | 239918, | 2731.9315, | 19079,   | 238404, | 2729.5782, | 19117,   | 240858, | 2727.2250, |
| 6.827200 |         |            | 6.821319 |         |            | 6.815439 |         |            |
| 19042,   | 240776, | 2731.8695, | 19080,   | 238566, | 2729.5163, | 19118,   | 240314, | 2727.1631, |
| 6.827045 |         |            | 6.821165 |         |            | 6.815284 |         |            |
| 19043,   | 241458, | 2731.8076, | 19081,   | 238268, | 2729.4544, | 19119,   | 239760, | 2727.1012, |
| 6.826891 |         |            | 6.821010 |         |            | 6.815129 |         |            |
| 19044,   | 241920, | 2731.7457, | 19082,   | 237818, | 2729.3925, | 19120,   | 239602, | 2727.0392, |
| 6.826736 |         |            | 6.820855 |         |            | 6.814974 |         |            |
| 19045,   | 242150, | 2731.6837, | 19083,   | 237668, | 2729.3305, | 19121,   | 239992, | 2726.9773, |
| 6.826581 |         |            | 6.820700 |         |            | 6.814820 |         |            |
| 19046,   | 241982, | 2731.6218, | 19084,   | 237940, | 2729.2686, | 19122,   | 240610, | 2726.9154, |
| 6.826426 |         |            | 6.820546 |         |            | 6.814665 |         |            |

|          |         |            |          |         |            |          |         |            |
|----------|---------|------------|----------|---------|------------|----------|---------|------------|
| 19123,   | 240956, | 2726.8534, | 19161,   | 239324, | 2724.5002, | 19199,   | 243416, | 2722.1470, |
| 6.814510 |         |            | 6.808629 |         |            | 6.802748 |         |            |
| 19124,   | 240840, | 2726.7915, | 19162,   | 239592, | 2724.4383, | 19200,   | 242512, | 2722.0851, |
| 6.814355 |         |            | 6.808474 |         |            | 6.802594 |         |            |
| 19125,   | 240584, | 2726.7296, | 19163,   | 240204, | 2724.3764, | 19201,   | 241562, | 2722.0232, |
| 6.814201 |         |            | 6.808320 |         |            | 6.802439 |         |            |
| 19126,   | 240644, | 2726.6677, | 19164,   | 241178, | 2724.3144, | 19202,   | 241160, | 2721.9612, |
| 6.814046 |         |            | 6.808165 |         |            | 6.802284 |         |            |
| 19127,   | 241106, | 2726.6057, | 19165,   | 242222, | 2724.2525, | 19203,   | 241446, | 2721.8993, |
| 6.813891 |         |            | 6.808010 |         |            | 6.802129 |         |            |
| 19128,   | 241578, | 2726.5438, | 19166,   | 242876, | 2724.1906, | 19204,   | 242002, | 2721.8374, |
| 6.813736 |         |            | 6.807855 |         |            | 6.801975 |         |            |
| 19129,   | 241650, | 2726.4819, | 19167,   | 242884, | 2724.1287, | 19205,   | 242304, | 2721.7754, |
| 6.813581 |         |            | 6.807701 |         |            | 6.801820 |         |            |
| 19130,   | 241324, | 2726.4200, | 19168,   | 242480, | 2724.0667, | 19206,   | 242220, | 2721.7135, |
| 6.813427 |         |            | 6.807546 |         |            | 6.801665 |         |            |
| 19131,   | 240996, | 2726.3580, | 19169,   | 242164, | 2724.0048, | 19207,   | 242026, | 2721.6516, |
| 6.813272 |         |            | 6.807391 |         |            | 6.801510 |         |            |
| 19132,   | 240984, | 2726.2961, | 19170,   | 242258, | 2723.9429, | 19208,   | 242048, | 2721.5897, |
| 6.813117 |         |            | 6.807236 |         |            | 6.801356 |         |            |
| 19133,   | 241160, | 2726.2342, | 19171,   | 242616, | 2723.8810, | 19209,   | 242276, | 2721.5277, |
| 6.812962 |         |            | 6.807082 |         |            | 6.801201 |         |            |
| 19134,   | 241140, | 2726.1723, | 19172,   | 242864, | 2723.8190, | 19210,   | 242444, | 2721.4658, |
| 6.812808 |         |            | 6.806927 |         |            | 6.801046 |         |            |
| 19135,   | 240784, | 2726.1103, | 19173,   | 242834, | 2723.7571, | 19211,   | 242376, | 2721.4039, |
| 6.812653 |         |            | 6.806772 |         |            | 6.800891 |         |            |
| 19136,   | 240416, | 2726.0484, | 19174,   | 242746, | 2723.6952, | 19212,   | 242174, | 2721.3420, |
| 6.812498 |         |            | 6.806617 |         |            | 6.800737 |         |            |
| 19137,   | 240500, | 2725.9865, | 19175,   | 242908, | 2723.6333, | 19213,   | 242100, | 2721.2800, |
| 6.812343 |         |            | 6.806463 |         |            | 6.800582 |         |            |
| 19138,   | 241132, | 2725.9245, | 19176,   | 243346, | 2723.5713, | 19214,   | 242236, | 2721.2181, |
| 6.812189 |         |            | 6.806308 |         |            | 6.800427 |         |            |
| 19139,   | 241906, | 2725.8626, | 19177,   | 243732, | 2723.5094, | 19215,   | 242440, | 2721.1562, |
| 6.812034 |         |            | 6.806153 |         |            | 6.800272 |         |            |
| 19140,   | 242314, | 2725.8007, | 19178,   | 243784, | 2723.4475, | 19216,   | 242554, | 2721.0942, |
| 6.811879 |         |            | 6.805998 |         |            | 6.800118 |         |            |
| 19141,   | 242236, | 2725.7388, | 19179,   | 243540, | 2723.3855, | 19217,   | 242570, | 2721.0323, |
| 6.811724 |         |            | 6.805844 |         |            | 6.799963 |         |            |
| 19142,   | 241974, | 2725.6768, | 19180,   | 243318, | 2723.3236, | 19218,   | 242592, | 2720.9704, |
| 6.811570 |         |            | 6.805689 |         |            | 6.799808 |         |            |
| 19143,   | 241886, | 2725.6149, | 19181,   | 243322, | 2723.2617, | 19219,   | 242634, | 2720.9085, |
| 6.811415 |         |            | 6.805534 |         |            | 6.799653 |         |            |
| 19144,   | 241986, | 2725.5530, | 19182,   | 243466, | 2723.1998, | 19220,   | 242560, | 2720.8465, |
| 6.811260 |         |            | 6.805379 |         |            | 6.799499 |         |            |
| 19145,   | 242010, | 2725.4911, | 19183,   | 243506, | 2723.1378, | 19221,   | 242316, | 2720.7846, |
| 6.811105 |         |            | 6.805225 |         |            | 6.799344 |         |            |
| 19146,   | 241768, | 2725.4291, | 19184,   | 243390, | 2723.0759, | 19222,   | 242054, | 2720.7227, |
| 6.810951 |         |            | 6.805070 |         |            | 6.799189 |         |            |
| 19147,   | 241320, | 2725.3672, | 19185,   | 243298, | 2723.0140, | 19223,   | 242024, | 2720.6608, |
| 6.810796 |         |            | 6.804915 |         |            | 6.799034 |         |            |
| 19148,   | 240836, | 2725.3053, | 19186,   | 243400, | 2722.9521, | 19224,   | 242238, | 2720.5988, |
| 6.810641 |         |            | 6.804760 |         |            | 6.798880 |         |            |
| 19149,   | 240332, | 2725.2434, | 19187,   | 243592, | 2722.8901, | 19225,   | 242368, | 2720.5369, |
| 6.810486 |         |            | 6.804606 |         |            | 6.798725 |         |            |
| 19150,   | 239660, | 2725.1814, | 19188,   | 243590, | 2722.8282, | 19226,   | 242038, | 2720.4750, |
| 6.810332 |         |            | 6.804451 |         |            | 6.798570 |         |            |
| 19151,   | 238816, | 2725.1195, | 19189,   | 243268, | 2722.7663, | 19227,   | 241274, | 2720.4131, |
| 6.810177 |         |            | 6.804296 |         |            | 6.798415 |         |            |
| 19152,   | 238100, | 2725.0576, | 19190,   | 242822, | 2722.7043, | 19228,   | 240580, | 2720.3511, |
| 6.810022 |         |            | 6.804141 |         |            | 6.798260 |         |            |
| 19153,   | 237938, | 2724.9956, | 19191,   | 242568, | 2722.6424, | 19229,   | 240534, | 2720.2892, |
| 6.809867 |         |            | 6.803987 |         |            | 6.798106 |         |            |
| 19154,   | 238452, | 2724.9337, | 19192,   | 242614, | 2722.5805, | 19230,   | 241292, | 2720.2273, |
| 6.809713 |         |            | 6.803832 |         |            | 6.797951 |         |            |
| 19155,   | 239292, | 2724.8718, | 19193,   | 242768, | 2722.5186, | 19231,   | 242472, | 2720.1653, |
| 6.809558 |         |            | 6.803677 |         |            | 6.797796 |         |            |
| 19156,   | 239918, | 2724.8099, | 19194,   | 242840, | 2722.4566, | 19232,   | 243560, | 2720.1034, |
| 6.809403 |         |            | 6.803522 |         |            | 6.797641 |         |            |
| 19157,   | 240036, | 2724.7479, | 19195,   | 242890, | 2722.3947, | 19233,   | 244318, | 2720.0415, |
| 6.809248 |         |            | 6.803367 |         |            | 6.797487 |         |            |
| 19158,   | 239776, | 2724.6860, | 19196,   | 243116, | 2722.3328, | 19234,   | 244844, | 2719.9796, |
| 6.809094 |         |            | 6.803213 |         |            | 6.797332 |         |            |
| 19159,   | 239456, | 2724.6241, | 19197,   | 243522, | 2722.2709, | 19235,   | 245222, | 2719.9176, |
| 6.808939 |         |            | 6.803058 |         |            | 6.797177 |         |            |
| 19160,   | 239294, | 2724.5622, | 19198,   | 243758, | 2722.2089, | 19236,   | 245330, | 2719.8557, |
| 6.808784 |         |            | 6.802903 |         |            | 6.797022 |         |            |

|          |         |            |          |         |            |          |         |            |
|----------|---------|------------|----------|---------|------------|----------|---------|------------|
| 19237,   | 244966, | 2719.7938, | 19275,   | 242604, | 2717.4406, | 19313,   | 243518, | 2715.0873, |
| 6.796868 |         |            | 6.790987 |         |            | 6.785106 |         |            |
| 19238,   | 244182, | 2719.7319, | 19276,   | 242034, | 2717.3786, | 19314,   | 243212, | 2715.0254, |
| 6.796713 |         |            | 6.790832 |         |            | 6.784951 |         |            |
| 19239,   | 243360, | 2719.6699, | 19277,   | 241490, | 2717.3167, | 19315,   | 242924, | 2714.9635, |
| 6.796558 |         |            | 6.790677 |         |            | 6.784797 |         |            |
| 19240,   | 242880, | 2719.6080, | 19278,   | 241282, | 2717.2548, | 19316,   | 243096, | 2714.9016, |
| 6.796403 |         |            | 6.790523 |         |            | 6.784642 |         |            |
| 19241,   | 242776, | 2719.5461, | 19279,   | 241476, | 2717.1929, | 19317,   | 243784, | 2714.8396, |
| 6.796249 |         |            | 6.790368 |         |            | 6.784487 |         |            |
| 19242,   | 242704, | 2719.4841, | 19280,   | 241848, | 2717.1309, | 19318,   | 244624, | 2714.7777, |
| 6.796094 |         |            | 6.790213 |         |            | 6.784332 |         |            |
| 19243,   | 242332, | 2719.4222, | 19281,   | 242190, | 2717.0690, | 19319,   | 245206, | 2714.7158, |
| 6.795939 |         |            | 6.790058 |         |            | 6.784178 |         |            |
| 19244,   | 241656, | 2719.3603, | 19282,   | 242532, | 2717.0071, | 19320,   | 245466, | 2714.6538, |
| 6.795784 |         |            | 6.789904 |         |            | 6.784023 |         |            |
| 19245,   | 240984, | 2719.2984, | 19283,   | 243036, | 2716.9451, | 19321,   | 245574, | 2714.5919, |
| 6.795630 |         |            | 6.789749 |         |            | 6.783868 |         |            |
| 19246,   | 240610, | 2719.2364, | 19284,   | 243718, | 2716.8832, | 19322,   | 245632, | 2714.5300, |
| 6.795475 |         |            | 6.789594 |         |            | 6.783713 |         |            |
| 19247,   | 240604, | 2719.1745, | 19285,   | 244348, | 2716.8213, | 19323,   | 245500, | 2714.4681, |
| 6.795320 |         |            | 6.789439 |         |            | 6.783559 |         |            |
| 19248,   | 240874, | 2719.1126, | 19286,   | 244690, | 2716.7594, | 19324,   | 244940, | 2714.4061, |
| 6.795165 |         |            | 6.789285 |         |            | 6.783404 |         |            |
| 19249,   | 241370, | 2719.0507, | 19287,   | 244816, | 2716.6974, | 19325,   | 243970, | 2714.3442, |
| 6.795011 |         |            | 6.789130 |         |            | 6.783249 |         |            |
| 19250,   | 242070, | 2718.9887, | 19288,   | 245062, | 2716.6355, | 19326,   | 242874, | 2714.2823, |
| 6.794856 |         |            | 6.788975 |         |            | 6.783094 |         |            |
| 19251,   | 242826, | 2718.9268, | 19289,   | 245680, | 2716.5736, | 19327,   | 241996, | 2714.2204, |
| 6.794701 |         |            | 6.788820 |         |            | 6.782939 |         |            |
| 19252,   | 243294, | 2718.8649, | 19290,   | 246534, | 2716.5117, | 19328,   | 241494, | 2714.1584, |
| 6.794546 |         |            | 6.788666 |         |            | 6.782785 |         |            |
| 19253,   | 243196, | 2718.8030, | 19291,   | 247238, | 2716.4497, | 19329,   | 241316, | 2714.0965, |
| 6.794392 |         |            | 6.788511 |         |            | 6.782630 |         |            |
| 19254,   | 242628, | 2718.7410, | 19292,   | 247494, | 2716.3878, | 19330,   | 241418, | 2714.0346, |
| 6.794237 |         |            | 6.788356 |         |            | 6.782475 |         |            |
| 19255,   | 242044, | 2718.6791, | 19293,   | 247352, | 2716.3259, | 19331,   | 241828, | 2713.9727, |
| 6.794082 |         |            | 6.788201 |         |            | 6.782320 |         |            |
| 19256,   | 241870, | 2718.6172, | 19294,   | 247040, | 2716.2639, | 19332,   | 242518, | 2713.9107, |
| 6.793927 |         |            | 6.788046 |         |            | 6.782166 |         |            |
| 19257,   | 242088, | 2718.5552, | 19295,   | 246674, | 2716.2020, | 19333,   | 243270, | 2713.8488, |
| 6.793773 |         |            | 6.787892 |         |            | 6.782011 |         |            |
| 19258,   | 242300, | 2718.4933, | 19296,   | 246214, | 2716.1401, | 19334,   | 243804, | 2713.7869, |
| 6.793618 |         |            | 6.787737 |         |            | 6.781856 |         |            |
| 19259,   | 242172, | 2718.4314, | 19297,   | 245648, | 2716.0782, | 19335,   | 244048, | 2713.7249, |
| 6.793463 |         |            | 6.787582 |         |            | 6.781701 |         |            |
| 19260,   | 241824, | 2718.3695, | 19298,   | 245198, | 2716.0162, | 19336,   | 244280, | 2713.6630, |
| 6.793308 |         |            | 6.787427 |         |            | 6.781547 |         |            |
| 19261,   | 241678, | 2718.3075, | 19299,   | 245142, | 2715.9543, | 19337,   | 244814, | 2713.6011, |
| 6.793153 |         |            | 6.787273 |         |            | 6.781392 |         |            |
| 19262,   | 241984, | 2718.2456, | 19300,   | 245490, | 2715.8924, | 19338,   | 245608, | 2713.5392, |
| 6.792999 |         |            | 6.787118 |         |            | 6.781237 |         |            |
| 19263,   | 242550, | 2718.1837, | 19301,   | 245892, | 2715.8305, | 19339,   | 246214, | 2713.4772, |
| 6.792844 |         |            | 6.786963 |         |            | 6.781082 |         |            |
| 19264,   | 242966, | 2718.1218, | 19302,   | 245946, | 2715.7685, | 19340,   | 246128, | 2713.4153, |
| 6.792689 |         |            | 6.786808 |         |            | 6.780928 |         |            |
| 19265,   | 243092, | 2718.0598, | 19303,   | 245584, | 2715.7066, | 19341,   | 245304, | 2713.3534, |
| 6.792534 |         |            | 6.786654 |         |            | 6.780773 |         |            |
| 19266,   | 243202, | 2717.9979, | 19304,   | 245120, | 2715.6447, | 19342,   | 244222, | 2713.2915, |
| 6.792380 |         |            | 6.786499 |         |            | 6.780618 |         |            |
| 19267,   | 243652, | 2717.9360, | 19305,   | 244870, | 2715.5828, | 19343,   | 243458, | 2713.2295, |
| 6.792225 |         |            | 6.786344 |         |            | 6.780463 |         |            |
| 19268,   | 244392, | 2717.8740, | 19306,   | 244794, | 2715.5208, | 19344,   | 243224, | 2713.1676, |
| 6.792070 |         |            | 6.786189 |         |            | 6.780309 |         |            |
| 19269,   | 244966, | 2717.8121, | 19307,   | 244564, | 2715.4589, | 19345,   | 243330, | 2713.1057, |
| 6.791915 |         |            | 6.786035 |         |            | 6.780154 |         |            |
| 19270,   | 244956, | 2717.7502, | 19308,   | 244004, | 2715.3970, | 19346,   | 243510, | 2713.0438, |
| 6.791761 |         |            | 6.785880 |         |            | 6.779999 |         |            |
| 19271,   | 244396, | 2717.6883, | 19309,   | 243342, | 2715.3350, | 19347,   | 243774, | 2712.9818, |
| 6.791606 |         |            | 6.785725 |         |            | 6.779844 |         |            |
| 19272,   | 243708, | 2717.6263, | 19310,   | 243006, | 2715.2731, | 19348,   | 244278, | 2712.9199, |
| 6.791451 |         |            | 6.785570 |         |            | 6.779690 |         |            |
| 19273,   | 243248, | 2717.5644, | 19311,   | 243154, | 2715.2112, | 19349,   | 245028, | 2712.8580, |
| 6.791296 |         |            | 6.785416 |         |            | 6.779535 |         |            |
| 19274,   | 242970, | 2717.5025, | 19312,   | 243472, | 2715.1493, | 19350,   | 245726, | 2712.7960, |
| 6.791142 |         |            | 6.785261 |         |            | 6.779380 |         |            |

|          |         |            |          |         |            |          |         |            |
|----------|---------|------------|----------|---------|------------|----------|---------|------------|
| 19351,   | 246008, | 2712.7341, | 19389,   | 244598, | 2710.3809, | 19427,   | 246558, | 2708.0277, |
| 6.779225 |         |            | 6.773344 |         |            | 6.767464 |         |            |
| 19352,   | 245824, | 2712.6722, | 19390,   | 244360, | 2710.3190, | 19428,   | 246000, | 2707.9657, |
| 6.779071 |         |            | 6.773190 |         |            | 6.767309 |         |            |
| 19353,   | 245448, | 2712.6103, | 19391,   | 244402, | 2710.2570, | 19429,   | 245296, | 2707.9038, |
| 6.778916 |         |            | 6.773035 |         |            | 6.767154 |         |            |
| 19354,   | 245204, | 2712.5483, | 19392,   | 244770, | 2710.1951, | 19430,   | 244860, | 2707.8419, |
| 6.778761 |         |            | 6.772880 |         |            | 6.766999 |         |            |
| 19355,   | 245128, | 2712.4864, | 19393,   | 245184, | 2710.1332, | 19431,   | 244804, | 2707.7800, |
| 6.778606 |         |            | 6.772725 |         |            | 6.766845 |         |            |
| 19356,   | 244994, | 2712.4245, | 19394,   | 245352, | 2710.0713, | 19432,   | 245026, | 2707.7180, |
| 6.778451 |         |            | 6.772571 |         |            | 6.766690 |         |            |
| 19357,   | 244656, | 2712.3626, | 19395,   | 245280, | 2710.0093, | 19433,   | 245446, | 2707.6561, |
| 6.778297 |         |            | 6.772416 |         |            | 6.766535 |         |            |
| 19358,   | 244228, | 2712.3006, | 19396,   | 245214, | 2709.9474, | 19434,   | 246068, | 2707.5942, |
| 6.778142 |         |            | 6.772261 |         |            | 6.766380 |         |            |
| 19359,   | 243986, | 2712.2387, | 19397,   | 245320, | 2709.8855, | 19435,   | 246790, | 2707.5323, |
| 6.777987 |         |            | 6.772106 |         |            | 6.766226 |         |            |
| 19360,   | 244016, | 2712.1768, | 19398,   | 245436, | 2709.8236, | 19436,   | 247324, | 2707.4703, |
| 6.777832 |         |            | 6.771952 |         |            | 6.766071 |         |            |
| 19361,   | 244122, | 2712.1148, | 19399,   | 245308, | 2709.7616, | 19437,   | 247354, | 2707.4084, |
| 6.777678 |         |            | 6.771797 |         |            | 6.765916 |         |            |
| 19362,   | 244042, | 2712.0529, | 19400,   | 244958, | 2709.6997, | 19438,   | 246900, | 2707.3465, |
| 6.777523 |         |            | 6.771642 |         |            | 6.765761 |         |            |
| 19363,   | 243770, | 2711.9910, | 19401,   | 244782, | 2709.6378, | 19439,   | 246318, | 2707.2845, |
| 6.777368 |         |            | 6.771487 |         |            | 6.765607 |         |            |
| 19364,   | 243588, | 2711.9291, | 19402,   | 245170, | 2709.5758, | 19440,   | 246016, | 2707.2226, |
| 6.777213 |         |            | 6.771333 |         |            | 6.765452 |         |            |
| 19365,   | 243786, | 2711.8671, | 19403,   | 246054, | 2709.5139, | 19441,   | 245998, | 2707.1607, |
| 6.777059 |         |            | 6.771178 |         |            | 6.765297 |         |            |
| 19366,   | 244354, | 2711.8052, | 19404,   | 246884, | 2709.4520, | 19442,   | 245930, | 2707.0988, |
| 6.776904 |         |            | 6.771023 |         |            | 6.765142 |         |            |
| 19367,   | 244980, | 2711.7433, | 19405,   | 247128, | 2709.3901, | 19443,   | 245508, | 2707.0368, |
| 6.776749 |         |            | 6.770868 |         |            | 6.764988 |         |            |
| 19368,   | 245272, | 2711.6814, | 19406,   | 246758, | 2709.3281, | 19444,   | 244804, | 2706.9749, |
| 6.776594 |         |            | 6.770714 |         |            | 6.764833 |         |            |
| 19369,   | 245040, | 2711.6194, | 19407,   | 246200, | 2709.2662, | 19445,   | 244206, | 2706.9130, |
| 6.776440 |         |            | 6.770559 |         |            | 6.764678 |         |            |
| 19370,   | 244334, | 2711.5575, | 19408,   | 245848, | 2709.2043, | 19446,   | 243960, | 2706.8511, |
| 6.776285 |         |            | 6.770404 |         |            | 6.764523 |         |            |
| 19371,   | 243386, | 2711.4956, | 19409,   | 245662, | 2709.1424, | 19447,   | 243954, | 2706.7891, |
| 6.776130 |         |            | 6.770249 |         |            | 6.764369 |         |            |
| 19372,   | 242494, | 2711.4337, | 19410,   | 245318, | 2709.0804, | 19448,   | 243906, | 2706.7272, |
| 6.775975 |         |            | 6.770095 |         |            | 6.764214 |         |            |
| 19373,   | 241948, | 2711.3717, | 19411,   | 244656, | 2709.0185, | 19449,   | 243754, | 2706.6653, |
| 6.775821 |         |            | 6.769940 |         |            | 6.764059 |         |            |
| 19374,   | 241942, | 2711.3098, | 19412,   | 243948, | 2708.9566, | 19450,   | 243764, | 2706.6034, |
| 6.775666 |         |            | 6.769785 |         |            | 6.763904 |         |            |
| 19375,   | 242408, | 2711.2479, | 19413,   | 243644, | 2708.8946, | 19451,   | 244164, | 2706.5414, |
| 6.775511 |         |            | 6.769630 |         |            | 6.763750 |         |            |
| 19376,   | 243004, | 2711.1859, | 19414,   | 243914, | 2708.8327, | 19452,   | 244850, | 2706.4795, |
| 6.775356 |         |            | 6.769476 |         |            | 6.763595 |         |            |
| 19377,   | 243334, | 2711.1240, | 19415,   | 244482, | 2708.7708, | 19453,   | 245402, | 2706.4176, |
| 6.775202 |         |            | 6.769321 |         |            | 6.763440 |         |            |
| 19378,   | 243254, | 2711.0621, | 19416,   | 244914, | 2708.7089, | 19454,   | 245550, | 2706.3556, |
| 6.775047 |         |            | 6.769166 |         |            | 6.763285 |         |            |
| 19379,   | 242996, | 2711.0002, | 19417,   | 245032, | 2708.6469, | 19455,   | 245472, | 2706.2937, |
| 6.774892 |         |            | 6.769011 |         |            | 6.763130 |         |            |
| 19380,   | 242932, | 2710.9382, | 19418,   | 244952, | 2708.5850, | 19456,   | 245576, | 2706.2318, |
| 6.774737 |         |            | 6.768857 |         |            | 6.762976 |         |            |
| 19381,   | 243220, | 2710.8763, | 19419,   | 244836, | 2708.5231, | 19457,   | 246008, | 2706.1699, |
| 6.774583 |         |            | 6.768702 |         |            | 6.762821 |         |            |
| 19382,   | 243682, | 2710.8144, | 19420,   | 244682, | 2708.4612, | 19458,   | 246432, | 2706.1079, |
| 6.774428 |         |            | 6.768547 |         |            | 6.762666 |         |            |
| 19383,   | 244020, | 2710.7525, | 19421,   | 244418, | 2708.3992, | 19459,   | 246398, | 2706.0460, |
| 6.774273 |         |            | 6.768392 |         |            | 6.762511 |         |            |
| 19384,   | 244160, | 2710.6905, | 19422,   | 244176, | 2708.3373, | 19460,   | 245842, | 2705.9841, |
| 6.774118 |         |            | 6.768237 |         |            | 6.762357 |         |            |
| 19385,   | 244266, | 2710.6286, | 19423,   | 244276, | 2708.2754, | 19461,   | 245218, | 2705.9222, |
| 6.773964 |         |            | 6.768083 |         |            | 6.762202 |         |            |
| 19386,   | 244490, | 2710.5667, | 19424,   | 244908, | 2708.2135, | 19462,   | 245050, | 2705.8602, |
| 6.773809 |         |            | 6.767928 |         |            | 6.762047 |         |            |
| 19387,   | 244748, | 2710.5047, | 19425,   | 245840, | 2708.1515, | 19463,   | 245428, | 2705.7983, |
| 6.773654 |         |            | 6.767773 |         |            | 6.761892 |         |            |
| 19388,   | 244804, | 2710.4428, | 19426,   | 246530, | 2708.0896, | 19464,   | 245950, | 2705.7364, |
| 6.773499 |         |            | 6.767618 |         |            | 6.761738 |         |            |

|          |         |            |          |         |            |          |         |            |
|----------|---------|------------|----------|---------|------------|----------|---------|------------|
| 19465,   | 246190, | 2705.6744, | 19503,   | 248074, | 2703.3212, | 19541,   | 248572, | 2700.9680, |
| 6.761583 |         |            | 6.755702 |         |            | 6.749821 |         |            |
| 19466,   | 246102, | 2705.6125, | 19504,   | 246940, | 2703.2593, | 19542,   | 248730, | 2700.9061, |
| 6.761428 |         |            | 6.755547 |         |            | 6.749667 |         |            |
| 19467,   | 245986, | 2705.5506, | 19505,   | 246260, | 2703.1974, | 19543,   | 248998, | 2700.8441, |
| 6.761273 |         |            | 6.755393 |         |            | 6.749512 |         |            |
| 19468,   | 246074, | 2705.4887, | 19506,   | 246322, | 2703.1354, | 19544,   | 249316, | 2700.7822, |
| 6.761119 |         |            | 6.755238 |         |            | 6.749357 |         |            |
| 19469,   | 246278, | 2705.4267, | 19507,   | 246800, | 2703.0735, | 19545,   | 249558, | 2700.7203, |
| 6.760964 |         |            | 6.755083 |         |            | 6.749202 |         |            |
| 19470,   | 246342, | 2705.3648, | 19508,   | 247132, | 2703.0116, | 19546,   | 249664, | 2700.6584, |
| 6.760809 |         |            | 6.754928 |         |            | 6.749048 |         |            |
| 19471,   | 246224, | 2705.3029, | 19509,   | 247082, | 2702.9497, | 19547,   | 249706, | 2700.5964, |
| 6.760654 |         |            | 6.754774 |         |            | 6.748893 |         |            |
| 19472,   | 246174, | 2705.2410, | 19510,   | 246852, | 2702.8877, | 19548,   | 249794, | 2700.5345, |
| 6.760500 |         |            | 6.754619 |         |            | 6.748738 |         |            |
| 19473,   | 246438, | 2705.1790, | 19511,   | 246774, | 2702.8258, | 19549,   | 249958, | 2700.4726, |
| 6.760345 |         |            | 6.754464 |         |            | 6.748583 |         |            |
| 19474,   | 246946, | 2705.1171, | 19512,   | 246864, | 2702.7639, | 19550,   | 250120, | 2700.4107, |
| 6.760190 |         |            | 6.754309 |         |            | 6.748429 |         |            |
| 19475,   | 247324, | 2705.0552, | 19513,   | 246866, | 2702.7020, | 19551,   | 250242, | 2700.3487, |
| 6.760035 |         |            | 6.754155 |         |            | 6.748274 |         |            |
| 19476,   | 247286, | 2704.9933, | 19514,   | 246582, | 2702.6400, | 19552,   | 250366, | 2700.2868, |
| 6.759881 |         |            | 6.754000 |         |            | 6.748119 |         |            |
| 19477,   | 246886, | 2704.9313, | 19515,   | 246134, | 2702.5781, | 19553,   | 250548, | 2700.2249, |
| 6.759726 |         |            | 6.753845 |         |            | 6.747964 |         |            |
| 19478,   | 246448, | 2704.8694, | 19516,   | 245826, | 2702.5162, | 19554,   | 250690, | 2700.1630, |
| 6.759571 |         |            | 6.753690 |         |            | 6.747809 |         |            |
| 19479,   | 246206, | 2704.8075, | 19517,   | 245800, | 2702.4542, | 19555,   | 250542, | 2700.1010, |
| 6.759416 |         |            | 6.753536 |         |            | 6.747655 |         |            |
| 19480,   | 246100, | 2704.7455, | 19518,   | 245924, | 2702.3923, | 19556,   | 249976, | 2700.0391, |
| 6.759262 |         |            | 6.753381 |         |            | 6.747500 |         |            |
| 19481,   | 245962, | 2704.6836, | 19519,   | 245988, | 2702.3304, | 19557,   | 249182, | 2699.9772, |
| 6.759107 |         |            | 6.753226 |         |            | 6.747345 |         |            |
| 19482,   | 245732, | 2704.6217, | 19520,   | 245994, | 2702.2685, | 19558,   | 248584, | 2699.9152, |
| 6.758952 |         |            | 6.753071 |         |            | 6.747190 |         |            |
| 19483,   | 245530, | 2704.5598, | 19521,   | 246106, | 2702.2065, | 19559,   | 248442, | 2699.8533, |
| 6.758797 |         |            | 6.752916 |         |            | 6.747036 |         |            |
| 19484,   | 245456, | 2704.4978, | 19522,   | 246398, | 2702.1446, | 19560,   | 248634, | 2699.7914, |
| 6.758643 |         |            | 6.752762 |         |            | 6.746881 |         |            |
| 19485,   | 245462, | 2704.4359, | 19523,   | 246700, | 2702.0827, | 19561,   | 248780, | 2699.7295, |
| 6.758488 |         |            | 6.752607 |         |            | 6.746726 |         |            |
| 19486,   | 245452, | 2704.3740, | 19524,   | 246764, | 2702.0208, | 19562,   | 248664, | 2699.6675, |
| 6.758333 |         |            | 6.752452 |         |            | 6.746571 |         |            |
| 19487,   | 245492, | 2704.3121, | 19525,   | 246614, | 2701.9588, | 19563,   | 248414, | 2699.6056, |
| 6.758178 |         |            | 6.752297 |         |            | 6.746417 |         |            |
| 19488,   | 245784, | 2704.2501, | 19526,   | 246570, | 2701.8969, | 19564,   | 248300, | 2699.5437, |
| 6.758023 |         |            | 6.752143 |         |            | 6.746262 |         |            |
| 19489,   | 246454, | 2704.1882, | 19527,   | 246932, | 2701.8350, | 19565,   | 248312, | 2699.4818, |
| 6.757869 |         |            | 6.751988 |         |            | 6.746107 |         |            |
| 19490,   | 247326, | 2704.1263, | 19528,   | 247628, | 2701.7731, | 19566,   | 248100, | 2699.4198, |
| 6.757714 |         |            | 6.751833 |         |            | 6.745952 |         |            |
| 19491,   | 248050, | 2704.0643, | 19529,   | 248230, | 2701.7111, | 19567,   | 247410, | 2699.3579, |
| 6.757559 |         |            | 6.751678 |         |            | 6.745798 |         |            |
| 19492,   | 248396, | 2704.0024, | 19530,   | 248334, | 2701.6492, | 19568,   | 246460, | 2699.2960, |
| 6.757404 |         |            | 6.751524 |         |            | 6.745643 |         |            |
| 19493,   | 248466, | 2703.9405, | 19531,   | 247974, | 2701.5873, | 19569,   | 245906, | 2699.2341, |
| 6.757250 |         |            | 6.751369 |         |            | 6.745488 |         |            |
| 19494,   | 248504, | 2703.8786, | 19532,   | 247560, | 2701.5253, | 19570,   | 246248, | 2699.1721, |
| 6.757095 |         |            | 6.751214 |         |            | 6.745333 |         |            |
| 19495,   | 248592, | 2703.8166, | 19533,   | 247496, | 2701.4634, | 19571,   | 247336, | 2699.1102, |
| 6.756940 |         |            | 6.751059 |         |            | 6.745179 |         |            |
| 19496,   | 248590, | 2703.7547, | 19534,   | 247836, | 2701.4015, | 19572,   | 248470, | 2699.0483, |
| 6.756785 |         |            | 6.750905 |         |            | 6.745024 |         |            |
| 19497,   | 248400, | 2703.6928, | 19535,   | 248302, | 2701.3396, | 19573,   | 249038, | 2698.9863, |
| 6.756631 |         |            | 6.750750 |         |            | 6.744869 |         |            |
| 19498,   | 248198, | 2703.6309, | 19536,   | 248602, | 2701.2776, | 19574,   | 248990, | 2698.9244, |
| 6.756476 |         |            | 6.750595 |         |            | 6.744714 |         |            |
| 19499,   | 248298, | 2703.5689, | 19537,   | 248654, | 2701.2157, | 19575,   | 248756, | 2698.8625, |
| 6.756321 |         |            | 6.750440 |         |            | 6.744560 |         |            |
| 19500,   | 248748, | 2703.5070, | 19538,   | 248582, | 2701.1538, | 19576,   | 248700, | 2698.8006, |
| 6.756166 |         |            | 6.750286 |         |            | 6.744405 |         |            |
| 19501,   | 249158, | 2703.4451, | 19539,   | 248516, | 2701.0919, | 19577,   | 248778, | 2698.7386, |
| 6.756012 |         |            | 6.750131 |         |            | 6.744250 |         |            |
| 19502,   | 248974, | 2703.3832, | 19540,   | 248510, | 2701.0299, | 19578,   | 248678, | 2698.6767, |
| 6.755857 |         |            | 6.749976 |         |            | 6.744095 |         |            |

|          |         |            |          |         |            |          |         |            |
|----------|---------|------------|----------|---------|------------|----------|---------|------------|
| 19579,   | 248292, | 2698.6148, | 19617,   | 246438, | 2696.2616, | 19655,   | 248146, | 2693.9083, |
| 6.743941 |         |            | 6.738060 |         |            | 6.732179 |         |            |
| 19580,   | 247826, | 2698.5529, | 19618,   | 245732, | 2696.1996, | 19656,   | 247930, | 2693.8464, |
| 6.743786 |         |            | 6.737905 |         |            | 6.732024 |         |            |
| 19581,   | 247562, | 2698.4909, | 19619,   | 245552, | 2696.1377, | 19657,   | 248042, | 2693.7845, |
| 6.743631 |         |            | 6.737750 |         |            | 6.731869 |         |            |
| 19582,   | 247524, | 2698.4290, | 19620,   | 245878, | 2696.0758, | 19658,   | 248318, | 2693.7226, |
| 6.743476 |         |            | 6.737595 |         |            | 6.731715 |         |            |
| 19583,   | 247502, | 2698.3671, | 19621,   | 246330, | 2696.0139, | 19659,   | 248506, | 2693.6606, |
| 6.743322 |         |            | 6.737441 |         |            | 6.731560 |         |            |
| 19584,   | 247406, | 2698.3051, | 19622,   | 246612, | 2695.9519, | 19660,   | 248568, | 2693.5987, |
| 6.743167 |         |            | 6.737286 |         |            | 6.731405 |         |            |
| 19585,   | 247446, | 2698.2432, | 19623,   | 246802, | 2695.8900, | 19661,   | 248722, | 2693.5368, |
| 6.743012 |         |            | 6.737131 |         |            | 6.731250 |         |            |
| 19586,   | 247892, | 2698.1813, | 19624,   | 247202, | 2695.8281, | 19662,   | 249152, | 2693.4748, |
| 6.742857 |         |            | 6.736976 |         |            | 6.731096 |         |            |
| 19587,   | 248660, | 2698.1194, | 19625,   | 247910, | 2695.7661, | 19663,   | 249742, | 2693.4129, |
| 6.742702 |         |            | 6.736822 |         |            | 6.730941 |         |            |
| 19588,   | 249274, | 2698.0574, | 19626,   | 248612, | 2695.7042, | 19664,   | 250138, | 2693.3510, |
| 6.742548 |         |            | 6.736667 |         |            | 6.730786 |         |            |
| 19589,   | 249258, | 2697.9955, | 19627,   | 248892, | 2695.6423, | 19665,   | 250082, | 2693.2891, |
| 6.742393 |         |            | 6.736512 |         |            | 6.730631 |         |            |
| 19590,   | 248648, | 2697.9336, | 19628,   | 248638, | 2695.5804, | 19666,   | 249698, | 2693.2271, |
| 6.742238 |         |            | 6.736357 |         |            | 6.730477 |         |            |
| 19591,   | 247992, | 2697.8717, | 19629,   | 248168, | 2695.5184, | 19667,   | 249302, | 2693.1652, |
| 6.742083 |         |            | 6.736203 |         |            | 6.730322 |         |            |
| 19592,   | 247840, | 2697.8097, | 19630,   | 247914, | 2695.4565, | 19668,   | 249070, | 2693.1033, |
| 6.741929 |         |            | 6.736048 |         |            | 6.730167 |         |            |
| 19593,   | 248216, | 2697.7478, | 19631,   | 248032, | 2695.3946, | 19669,   | 248888, | 2693.0414, |
| 6.741774 |         |            | 6.735893 |         |            | 6.730012 |         |            |
| 19594,   | 248654, | 2697.6859, | 19632,   | 248376, | 2695.3327, | 19670,   | 248550, | 2692.9794, |
| 6.741619 |         |            | 6.735738 |         |            | 6.729858 |         |            |
| 19595,   | 248690, | 2697.6240, | 19633,   | 248784, | 2695.2707, | 19671,   | 248068, | 2692.9175, |
| 6.741464 |         |            | 6.735584 |         |            | 6.729703 |         |            |
| 19596,   | 248296, | 2697.5620, | 19634,   | 249298, | 2695.2088, | 19672,   | 247688, | 2692.8556, |
| 6.741310 |         |            | 6.735429 |         |            | 6.729548 |         |            |
| 19597,   | 247836, | 2697.5001, | 19635,   | 250070, | 2695.1469, | 19673,   | 247578, | 2692.7937, |
| 6.741155 |         |            | 6.735274 |         |            | 6.729393 |         |            |
| 19598,   | 247640, | 2697.4382, | 19636,   | 251090, | 2695.0849, | 19674,   | 247608, | 2692.7317, |
| 6.741000 |         |            | 6.735119 |         |            | 6.729239 |         |            |
| 19599,   | 247702, | 2697.3762, | 19637,   | 252084, | 2695.0230, | 19675,   | 247490, | 2692.6698, |
| 6.740845 |         |            | 6.734965 |         |            | 6.729084 |         |            |
| 19600,   | 247840, | 2697.3143, | 19638,   | 252742, | 2694.9611, | 19676,   | 247120, | 2692.6079, |
| 6.740691 |         |            | 6.734810 |         |            | 6.728929 |         |            |
| 19601,   | 247936, | 2697.2524, | 19639,   | 252972, | 2694.8992, | 19677,   | 246788, | 2692.5459, |
| 6.740536 |         |            | 6.734655 |         |            | 6.728774 |         |            |
| 19602,   | 248074, | 2697.1905, | 19640,   | 252932, | 2694.8372, | 19678,   | 246872, | 2692.4840, |
| 6.740381 |         |            | 6.734500 |         |            | 6.728620 |         |            |
| 19603,   | 248348, | 2697.1285, | 19641,   | 252784, | 2694.7753, | 19679,   | 247464, | 2692.4221, |
| 6.740226 |         |            | 6.734346 |         |            | 6.728465 |         |            |
| 19604,   | 248674, | 2697.0666, | 19642,   | 252512, | 2694.7134, | 19680,   | 248234, | 2692.3602, |
| 6.740072 |         |            | 6.734191 |         |            | 6.728310 |         |            |
| 19605,   | 248858, | 2697.0047, | 19643,   | 251966, | 2694.6515, | 19681,   | 248786, | 2692.2982, |
| 6.739917 |         |            | 6.734036 |         |            | 6.728155 |         |            |
| 19606,   | 248824, | 2696.9428, | 19644,   | 251126, | 2694.5895, | 19682,   | 249050, | 2692.2363, |
| 6.739762 |         |            | 6.733881 |         |            | 6.728000 |         |            |
| 19607,   | 248696, | 2696.8808, | 19645,   | 250186, | 2694.5276, | 19683,   | 249268, | 2692.1744, |
| 6.739607 |         |            | 6.733727 |         |            | 6.727846 |         |            |
| 19608,   | 248620, | 2696.8189, | 19646,   | 249414, | 2694.4657, | 19684,   | 249620, | 2692.1125, |
| 6.739453 |         |            | 6.733572 |         |            | 6.727691 |         |            |
| 19609,   | 248552, | 2696.7570, | 19647,   | 248942, | 2694.4038, | 19685,   | 249952, | 2692.0505, |
| 6.739298 |         |            | 6.733417 |         |            | 6.727536 |         |            |
| 19610,   | 248324, | 2696.6950, | 19648,   | 248704, | 2694.3418, | 19686,   | 249916, | 2691.9886, |
| 6.739143 |         |            | 6.733262 |         |            | 6.727381 |         |            |
| 19611,   | 247906, | 2696.6331, | 19649,   | 248612, | 2694.2799, | 19687,   | 249416, | 2691.9267, |
| 6.738988 |         |            | 6.733107 |         |            | 6.727227 |         |            |
| 19612,   | 247516, | 2696.5712, | 19650,   | 248648, | 2694.2180, | 19688,   | 248832, | 2691.8647, |
| 6.738834 |         |            | 6.732953 |         |            | 6.727072 |         |            |
| 19613,   | 247418, | 2696.5093, | 19651,   | 248804, | 2694.1560, | 19689,   | 248724, | 2691.8028, |
| 6.738679 |         |            | 6.732798 |         |            | 6.726917 |         |            |
| 19614,   | 247580, | 2696.4473, | 19652,   | 248952, | 2694.0941, | 19690,   | 249334, | 2691.7409, |
| 6.738524 |         |            | 6.732643 |         |            | 6.726762 |         |            |
| 19615,   | 247632, | 2696.3854, | 19653,   | 248900, | 2694.0322, | 19691,   | 250394, | 2691.6790, |
| 6.738369 |         |            | 6.732488 |         |            | 6.726608 |         |            |
| 19616,   | 247228, | 2696.3235, | 19654,   | 248568, | 2693.9703, | 19692,   | 251388, | 2691.6170, |
| 6.738215 |         |            | 6.732334 |         |            | 6.726453 |         |            |



|          |         |            |          |         |            |          |         |            |
|----------|---------|------------|----------|---------|------------|----------|---------|------------|
| 19693,   | 252012, | 2691.5551, | 19731,   | 250652, | 2689.2019, | 19769,   | 249228, | 2686.8487, |
| 6.726298 |         |            | 6.720417 |         |            | 6.714537 |         |            |
| 19694,   | 252330, | 2691.4932, | 19732,   | 249988, | 2689.1400, | 19770,   | 249302, | 2686.7867, |
| 6.726143 |         |            | 6.720263 |         |            | 6.714382 |         |            |
| 19695,   | 252512, | 2691.4313, | 19733,   | 249374, | 2689.0780, | 19771,   | 249726, | 2686.7248, |
| 6.725989 |         |            | 6.720108 |         |            | 6.714227 |         |            |
| 19696,   | 252612, | 2691.3693, | 19734,   | 248782, | 2689.0161, | 19772,   | 250100, | 2686.6629, |
| 6.725834 |         |            | 6.719953 |         |            | 6.714072 |         |            |
| 19697,   | 252546, | 2691.3074, | 19735,   | 248174, | 2688.9542, | 19773,   | 249960, | 2686.6010, |
| 6.725679 |         |            | 6.719798 |         |            | 6.713918 |         |            |
| 19698,   | 252312, | 2691.2455, | 19736,   | 247710, | 2688.8923, | 19774,   | 249292, | 2686.5390, |
| 6.725524 |         |            | 6.719644 |         |            | 6.713763 |         |            |
| 19699,   | 252094, | 2691.1836, | 19737,   | 247674, | 2688.8303, | 19775,   | 248616, | 2686.4771, |
| 6.725370 |         |            | 6.719489 |         |            | 6.713608 |         |            |
| 19700,   | 252094, | 2691.1216, | 19738,   | 248178, | 2688.7684, | 19776,   | 248480, | 2686.4152, |
| 6.725215 |         |            | 6.719334 |         |            | 6.713453 |         |            |
| 19701,   | 252308, | 2691.0597, | 19739,   | 248982, | 2688.7065, | 19777,   | 249008, | 2686.3533, |
| 6.725060 |         |            | 6.719179 |         |            | 6.713299 |         |            |
| 19702,   | 252514, | 2690.9978, | 19740,   | 249662, | 2688.6445, | 19778,   | 249882, | 2686.2913, |
| 6.724905 |         |            | 6.719025 |         |            | 6.713144 |         |            |
| 19703,   | 252526, | 2690.9358, | 19741,   | 249958, | 2688.5826, | 19779,   | 250742, | 2686.2294, |
| 6.724751 |         |            | 6.718870 |         |            | 6.712989 |         |            |
| 19704,   | 252398, | 2690.8739, | 19742,   | 249936, | 2688.5207, | 19780,   | 251504, | 2686.1675, |
| 6.724596 |         |            | 6.718715 |         |            | 6.712834 |         |            |
| 19705,   | 252334, | 2690.8120, | 19743,   | 249836, | 2688.4588, | 19781,   | 252264, | 2686.1055, |
| 6.724441 |         |            | 6.718560 |         |            | 6.712679 |         |            |
| 19706,   | 252454, | 2690.7501, | 19744,   | 249792, | 2688.3968, | 19782,   | 253016, | 2686.0436, |
| 6.724286 |         |            | 6.718406 |         |            | 6.712525 |         |            |
| 19707,   | 252656, | 2690.6881, | 19745,   | 249782, | 2688.3349, | 19783,   | 253578, | 2685.9817, |
| 6.724132 |         |            | 6.718251 |         |            | 6.712370 |         |            |
| 19708,   | 252788, | 2690.6262, | 19746,   | 249794, | 2688.2730, | 19784,   | 253802, | 2685.9198, |
| 6.723977 |         |            | 6.718096 |         |            | 6.712215 |         |            |
| 19709,   | 252822, | 2690.5643, | 19747,   | 249906, | 2688.2111, | 19785,   | 253798, | 2685.8578, |
| 6.723822 |         |            | 6.717941 |         |            | 6.712060 |         |            |
| 19710,   | 252904, | 2690.5024, | 19748,   | 250170, | 2688.1491, | 19786,   | 253788, | 2685.7959, |
| 6.723667 |         |            | 6.717786 |         |            | 6.711906 |         |            |
| 19711,   | 253084, | 2690.4404, | 19749,   | 250406, | 2688.0872, | 19787,   | 253804, | 2685.7340, |
| 6.723513 |         |            | 6.717632 |         |            | 6.711751 |         |            |
| 19712,   | 253192, | 2690.3785, | 19750,   | 250306, | 2688.0253, | 19788,   | 253604, | 2685.6721, |
| 6.723358 |         |            | 6.717477 |         |            | 6.711596 |         |            |
| 19713,   | 253002, | 2690.3166, | 19751,   | 249782, | 2687.9634, | 19789,   | 253014, | 2685.6101, |
| 6.723203 |         |            | 6.717322 |         |            | 6.711441 |         |            |
| 19714,   | 252496, | 2690.2546, | 19752,   | 249200, | 2687.9014, | 19790,   | 252262, | 2685.5482, |
| 6.723048 |         |            | 6.717167 |         |            | 6.711287 |         |            |
| 19715,   | 251954, | 2690.1927, | 19753,   | 249156, | 2687.8395, | 19791,   | 251888, | 2685.4863, |
| 6.722893 |         |            | 6.717013 |         |            | 6.711132 |         |            |
| 19716,   | 251718, | 2690.1308, | 19754,   | 249902, | 2687.7776, | 19792,   | 252234, | 2685.4244, |
| 6.722739 |         |            | 6.716858 |         |            | 6.710977 |         |            |
| 19717,   | 251830, | 2690.0689, | 19755,   | 251054, | 2687.7156, | 19793,   | 253016, | 2685.3624, |
| 6.722584 |         |            | 6.716703 |         |            | 6.710822 |         |            |
| 19718,   | 252012, | 2690.0069, | 19756,   | 251916, | 2687.6537, | 19794,   | 253538, | 2685.3005, |
| 6.722429 |         |            | 6.716548 |         |            | 6.710668 |         |            |
| 19719,   | 251940, | 2689.9450, | 19757,   | 252114, | 2687.5918, | 19795,   | 253332, | 2685.2386, |
| 6.722274 |         |            | 6.716394 |         |            | 6.710513 |         |            |
| 19720,   | 251566, | 2689.8831, | 19758,   | 251902, | 2687.5299, | 19796,   | 252622, | 2685.1766, |
| 6.722120 |         |            | 6.716239 |         |            | 6.710358 |         |            |
| 19721,   | 251088, | 2689.8212, | 19759,   | 251798, | 2687.4679, | 19797,   | 252048, | 2685.1147, |
| 6.721965 |         |            | 6.716084 |         |            | 6.710203 |         |            |
| 19722,   | 250708, | 2689.7592, | 19760,   | 251970, | 2687.4060, | 19798,   | 252056, | 2685.0528, |
| 6.721810 |         |            | 6.715929 |         |            | 6.710049 |         |            |
| 19723,   | 250438, | 2689.6973, | 19761,   | 252064, | 2687.3441, | 19799,   | 252478, | 2684.9909, |
| 6.721655 |         |            | 6.715775 |         |            | 6.709894 |         |            |
| 19724,   | 250192, | 2689.6354, | 19762,   | 251644, | 2687.2822, | 19800,   | 252798, | 2684.9289, |
| 6.721501 |         |            | 6.715620 |         |            | 6.709739 |         |            |
| 19725,   | 250002, | 2689.5735, | 19763,   | 250722, | 2687.2202, | 19801,   | 252722, | 2684.8670, |
| 6.721346 |         |            | 6.715465 |         |            | 6.709584 |         |            |
| 19726,   | 250050, | 2689.5115, | 19764,   | 249810, | 2687.1583, | 19802,   | 252398, | 2684.8051, |
| 6.721191 |         |            | 6.715310 |         |            | 6.709430 |         |            |
| 19727,   | 250442, | 2689.4496, | 19765,   | 249388, | 2687.0964, | 19803,   | 252174, | 2684.7432, |
| 6.721036 |         |            | 6.715156 |         |            | 6.709275 |         |            |
| 19728,   | 250992, | 2689.3877, | 19766,   | 249448, | 2687.0344, | 19804,   | 252172, | 2684.6812, |
| 6.720882 |         |            | 6.715001 |         |            | 6.709120 |         |            |
| 19729,   | 251324, | 2689.3257, | 19767,   | 249560, | 2686.9725, | 19805,   | 252210, | 2684.6193, |
| 6.720727 |         |            | 6.714846 |         |            | 6.708965 |         |            |
| 19730,   | 251184, | 2689.2638, | 19768,   | 249436, | 2686.9106, | 19806,   | 252126, | 2684.5574, |
| 6.720572 |         |            | 6.714691 |         |            | 6.708811 |         |            |

|          |         |            |          |         |            |          |         |            |
|----------|---------|------------|----------|---------|------------|----------|---------|------------|
| 19807,   | 251990, | 2684.4954, | 19845,   | 255486, | 2682.1422, | 19883,   | 253460, | 2679.7890, |
| 6.708656 |         |            | 6.702775 |         |            | 6.696894 |         |            |
| 19808,   | 251994, | 2684.4335, | 19846,   | 255424, | 2682.0803, | 19884,   | 253092, | 2679.7271, |
| 6.708501 |         |            | 6.702620 |         |            | 6.696739 |         |            |
| 19809,   | 252176, | 2684.3716, | 19847,   | 255382, | 2682.0184, | 19885,   | 253126, | 2679.6651, |
| 6.708346 |         |            | 6.702465 |         |            | 6.696585 |         |            |
| 19810,   | 252342, | 2684.3097, | 19848,   | 255360, | 2681.9564, | 19886,   | 253274, | 2679.6032, |
| 6.708192 |         |            | 6.702311 |         |            | 6.696430 |         |            |
| 19811,   | 252348, | 2684.2477, | 19849,   | 255276, | 2681.8945, | 19887,   | 253218, | 2679.5413, |
| 6.708037 |         |            | 6.702156 |         |            | 6.696275 |         |            |
| 19812,   | 252346, | 2684.1858, | 19850,   | 255156, | 2681.8326, | 19888,   | 252962, | 2679.4794, |
| 6.707882 |         |            | 6.702001 |         |            | 6.696120 |         |            |
| 19813,   | 252660, | 2684.1239, | 19851,   | 255182, | 2681.7707, | 19889,   | 252738, | 2679.4174, |
| 6.707727 |         |            | 6.701846 |         |            | 6.695966 |         |            |
| 19814,   | 253390, | 2684.0620, | 19852,   | 255430, | 2681.7087, | 19890,   | 252666, | 2679.3555, |
| 6.707572 |         |            | 6.701692 |         |            | 6.695811 |         |            |
| 19815,   | 254202, | 2684.0000, | 19853,   | 255756, | 2681.6468, | 19891,   | 252558, | 2679.2936, |
| 6.707418 |         |            | 6.701537 |         |            | 6.695656 |         |            |
| 19816,   | 254608, | 2683.9381, | 19854,   | 255918, | 2681.5849, | 19892,   | 252212, | 2679.2317, |
| 6.707263 |         |            | 6.701382 |         |            | 6.695501 |         |            |
| 19817,   | 254448, | 2683.8762, | 19855,   | 255842, | 2681.5230, | 19893,   | 251718, | 2679.1697, |
| 6.707108 |         |            | 6.701227 |         |            | 6.695347 |         |            |
| 19818,   | 254054, | 2683.8143, | 19856,   | 255700, | 2681.4610, | 19894,   | 251448, | 2679.1078, |
| 6.706953 |         |            | 6.701073 |         |            | 6.695192 |         |            |
| 19819,   | 253852, | 2683.7523, | 19857,   | 255646, | 2681.3991, | 19895,   | 251654, | 2679.0459, |
| 6.706799 |         |            | 6.700918 |         |            | 6.695037 |         |            |
| 19820,   | 253932, | 2683.6904, | 19858,   | 255578, | 2681.3372, | 19896,   | 252180, | 2678.9840, |
| 6.706644 |         |            | 6.700763 |         |            | 6.694882 |         |            |
| 19821,   | 253966, | 2683.6285, | 19859,   | 255248, | 2681.2752, | 19897,   | 252604, | 2678.9220, |
| 6.706489 |         |            | 6.700608 |         |            | 6.694728 |         |            |
| 19822,   | 253618, | 2683.5665, | 19860,   | 254622, | 2681.2133, | 19898,   | 252738, | 2678.8601, |
| 6.706334 |         |            | 6.700454 |         |            | 6.694573 |         |            |
| 19823,   | 252936, | 2683.5046, | 19861,   | 254064, | 2681.1514, | 19899,   | 252808, | 2678.7982, |
| 6.706180 |         |            | 6.700299 |         |            | 6.694418 |         |            |
| 19824,   | 252306, | 2683.4427, | 19862,   | 254076, | 2681.0895, | 19900,   | 253168, | 2678.7362, |
| 6.706025 |         |            | 6.700144 |         |            | 6.694263 |         |            |
| 19825,   | 252062, | 2683.3808, | 19863,   | 254804, | 2681.0275, | 19901,   | 253810, | 2678.6743, |
| 6.705870 |         |            | 6.699989 |         |            | 6.694109 |         |            |
| 19826,   | 252192, | 2683.3188, | 19864,   | 255868, | 2680.9656, | 19902,   | 254272, | 2678.6124, |
| 6.705715 |         |            | 6.699835 |         |            | 6.693954 |         |            |
| 19827,   | 252500, | 2683.2569, | 19865,   | 256676, | 2680.9037, | 19903,   | 254168, | 2678.5505, |
| 6.705561 |         |            | 6.699680 |         |            | 6.693799 |         |            |
| 19828,   | 252896, | 2683.1950, | 19866,   | 256918, | 2680.8418, | 19904,   | 253614, | 2678.4885, |
| 6.705406 |         |            | 6.699525 |         |            | 6.693644 |         |            |
| 19829,   | 253418, | 2683.1331, | 19867,   | 256728, | 2680.7798, | 19905,   | 253194, | 2678.4266, |
| 6.705251 |         |            | 6.699370 |         |            | 6.693490 |         |            |
| 19830,   | 253990, | 2683.0711, | 19868,   | 256408, | 2680.7179, | 19906,   | 253352, | 2678.3647, |
| 6.705096 |         |            | 6.699216 |         |            | 6.693335 |         |            |
| 19831,   | 254262, | 2683.0092, | 19869,   | 256114, | 2680.6560, | 19907,   | 253958, | 2678.3028, |
| 6.704942 |         |            | 6.699061 |         |            | 6.693180 |         |            |
| 19832,   | 253868, | 2682.9473, | 19870,   | 255786, | 2680.5941, | 19908,   | 254504, | 2678.2408, |
| 6.704787 |         |            | 6.698906 |         |            | 6.693025 |         |            |
| 19833,   | 252916, | 2682.8853, | 19871,   | 255396, | 2680.5321, | 19909,   | 254682, | 2678.1789, |
| 6.704632 |         |            | 6.698751 |         |            | 6.692871 |         |            |
| 19834,   | 252088, | 2682.8234, | 19872,   | 255086, | 2680.4702, | 19910,   | 254726, | 2678.1170, |
| 6.704477 |         |            | 6.698597 |         |            | 6.692716 |         |            |
| 19835,   | 252130, | 2682.7615, | 19873,   | 254990, | 2680.4083, | 19911,   | 255106, | 2678.0550, |
| 6.704323 |         |            | 6.698442 |         |            | 6.692561 |         |            |
| 19836,   | 253164, | 2682.6996, | 19874,   | 255026, | 2680.3463, | 19912,   | 255966, | 2677.9931, |
| 6.704168 |         |            | 6.698287 |         |            | 6.692406 |         |            |
| 19837,   | 254506, | 2682.6376, | 19875,   | 254904, | 2680.2844, | 19913,   | 256916, | 2677.9312, |
| 6.704013 |         |            | 6.698132 |         |            | 6.692251 |         |            |
| 19838,   | 255258, | 2682.5757, | 19876,   | 254498, | 2680.2225, | 19914,   | 257448, | 2677.8693, |
| 6.703858 |         |            | 6.697978 |         |            | 6.692097 |         |            |
| 19839,   | 255098, | 2682.5138, | 19877,   | 254026, | 2680.1606, | 19915,   | 257450, | 2677.8073, |
| 6.703704 |         |            | 6.697823 |         |            | 6.691942 |         |            |
| 19840,   | 254478, | 2682.4519, | 19878,   | 253884, | 2680.0986, | 19916,   | 257226, | 2677.7454, |
| 6.703549 |         |            | 6.697668 |         |            | 6.691787 |         |            |
| 19841,   | 254128, | 2682.3899, | 19879,   | 254190, | 2680.0367, | 19917,   | 257080, | 2677.6835, |
| 6.703394 |         |            | 6.697513 |         |            | 6.691632 |         |            |
| 19842,   | 254374, | 2682.3280, | 19880,   | 254600, | 2679.9748, | 19918,   | 256954, | 2677.6216, |
| 6.703239 |         |            | 6.697358 |         |            | 6.691478 |         |            |
| 19843,   | 254944, | 2682.2661, | 19881,   | 254620, | 2679.9129, | 19919,   | 256556, | 2677.5596, |
| 6.703085 |         |            | 6.697204 |         |            | 6.691323 |         |            |
| 19844,   | 255376, | 2682.2042, | 19882,   | 254126, | 2679.8509, | 19920,   | 255844, | 2677.4977, |
| 6.702930 |         |            | 6.697049 |         |            | 6.691168 |         |            |

|          |         |            |          |         |            |          |         |            |
|----------|---------|------------|----------|---------|------------|----------|---------|------------|
| 19921,   | 255210, | 2677.4358, | 19959,   | 255746, | 2675.0826, | 19997,   | 254672, | 2672.7293, |
| 6.691013 |         |            | 6.685133 |         |            | 6.679252 |         |            |
| 19922,   | 255124, | 2677.3739, | 19960,   | 256128, | 2675.0206, | 19998,   | 254454, | 2672.6674, |
| 6.690859 |         |            | 6.684978 |         |            | 6.679097 |         |            |
| 19923,   | 255626, | 2677.3119, | 19961,   | 256654, | 2674.9587, | 19999,   | 254928, | 2672.6055, |
| 6.690704 |         |            | 6.684823 |         |            | 6.678942 |         |            |
| 19924,   | 256212, | 2677.2500, | 19962,   | 256898, | 2674.8968, | 20000,   | 255762, | 2672.5436, |
| 6.690549 |         |            | 6.684668 |         |            | 6.678788 |         |            |
| 19925,   | 256328, | 2677.1881, | 19963,   | 256540, | 2674.8348, | 20001,   | 256500, | 2672.4816, |
| 6.690394 |         |            | 6.684514 |         |            | 6.678633 |         |            |
| 19926,   | 255850, | 2677.1261, | 19964,   | 255608, | 2674.7729, | 20002,   | 256942, | 2672.4197, |
| 6.690240 |         |            | 6.684359 |         |            | 6.678478 |         |            |
| 19927,   | 255148, | 2677.0642, | 19965,   | 254404, | 2674.7110, | 20003,   | 257166, | 2672.3578, |
| 6.690085 |         |            | 6.684204 |         |            | 6.678323 |         |            |
| 19928,   | 254616, | 2677.0023, | 19966,   | 253286, | 2674.6491, | 20004,   | 257266, | 2672.2958, |
| 6.689930 |         |            | 6.684049 |         |            | 6.678169 |         |            |
| 19929,   | 254280, | 2676.9404, | 19967,   | 252494, | 2674.5871, | 20005,   | 257230, | 2672.2339, |
| 6.689775 |         |            | 6.683895 |         |            | 6.678014 |         |            |
| 19930,   | 253896, | 2676.8784, | 19968,   | 252170, | 2674.5252, | 20006,   | 257046, | 2672.1720, |
| 6.689621 |         |            | 6.683740 |         |            | 6.677859 |         |            |
| 19931,   | 253366, | 2676.8165, | 19969,   | 252418, | 2674.4633, | 20007,   | 256882, | 2672.1101, |
| 6.689466 |         |            | 6.683585 |         |            | 6.677704 |         |            |
| 19932,   | 252892, | 2676.7546, | 19970,   | 253202, | 2674.4014, | 20008,   | 256954, | 2672.0481, |
| 6.689311 |         |            | 6.683430 |         |            | 6.677549 |         |            |
| 19933,   | 252786, | 2676.6927, | 19971,   | 254232, | 2674.3394, | 20009,   | 257262, | 2671.9862, |
| 6.689156 |         |            | 6.683276 |         |            | 6.677395 |         |            |
| 19934,   | 253048, | 2676.6307, | 19972,   | 255032, | 2674.2775, | 20010,   | 257492, | 2671.9243, |
| 6.689002 |         |            | 6.683121 |         |            | 6.677240 |         |            |
| 19935,   | 253366, | 2676.5688, | 19973,   | 255260, | 2674.2156, | 20011,   | 257288, | 2671.8624, |
| 6.688847 |         |            | 6.682966 |         |            | 6.677085 |         |            |
| 19936,   | 253440, | 2676.5069, | 19974,   | 254972, | 2674.1537, | 20012,   | 256654, | 2671.8004, |
| 6.688692 |         |            | 6.682811 |         |            | 6.676930 |         |            |
| 19937,   | 253368, | 2676.4449, | 19975,   | 254530, | 2674.0917, | 20013,   | 255992, | 2671.7385, |
| 6.688537 |         |            | 6.682656 |         |            | 6.676776 |         |            |
| 19938,   | 253520, | 2676.3830, | 19976,   | 254242, | 2674.0298, | 20014,   | 255690, | 2671.6766, |
| 6.688383 |         |            | 6.682502 |         |            | 6.676621 |         |            |
| 19939,   | 254152, | 2676.3211, | 19977,   | 254068, | 2673.9679, | 20015,   | 255742, | 2671.6147, |
| 6.688228 |         |            | 6.682347 |         |            | 6.676466 |         |            |
| 19940,   | 255110, | 2676.2592, | 19978,   | 253786, | 2673.9059, | 20016,   | 255748, | 2671.5527, |
| 6.688073 |         |            | 6.682192 |         |            | 6.676311 |         |            |
| 19941,   | 256004, | 2676.1972, | 19979,   | 253384, | 2673.8440, | 20017,   | 255382, | 2671.4908, |
| 6.687918 |         |            | 6.682037 |         |            | 6.676157 |         |            |
| 19942,   | 256602, | 2676.1353, | 19980,   | 253182, | 2673.7821, | 20018,   | 254734, | 2671.4289, |
| 6.687763 |         |            | 6.681883 |         |            | 6.676002 |         |            |
| 19943,   | 257014, | 2676.0734, | 19981,   | 253518, | 2673.7202, | 20019,   | 254194, | 2671.3669, |
| 6.687609 |         |            | 6.681728 |         |            | 6.675847 |         |            |
| 19944,   | 257466, | 2676.0115, | 19982,   | 254326, | 2673.6582, | 20020,   | 254006, | 2671.3050, |
| 6.687454 |         |            | 6.681573 |         |            | 6.675692 |         |            |
| 19945,   | 257982, | 2675.9495, | 19983,   | 255090, | 2673.5963, | 20021,   | 254010, | 2671.2431, |
| 6.687299 |         |            | 6.681418 |         |            | 6.675538 |         |            |
| 19946,   | 258332, | 2675.8876, | 19984,   | 255316, | 2673.5344, | 20022,   | 253872, | 2671.1812, |
| 6.687144 |         |            | 6.681264 |         |            | 6.675383 |         |            |
| 19947,   | 258286, | 2675.8257, | 19985,   | 255054, | 2673.4725, | 20023,   | 253522, | 2671.1192, |
| 6.686990 |         |            | 6.681109 |         |            | 6.675228 |         |            |
| 19948,   | 257872, | 2675.7638, | 19986,   | 254810, | 2673.4105, | 20024,   | 253254, | 2671.0573, |
| 6.686835 |         |            | 6.680954 |         |            | 6.675073 |         |            |
| 19949,   | 257344, | 2675.7018, | 19987,   | 255032, | 2673.3486, | 20025,   | 253408, | 2670.9954, |
| 6.686680 |         |            | 6.680799 |         |            | 6.674919 |         |            |
| 19950,   | 256926, | 2675.6399, | 19988,   | 255638, | 2673.2867, | 20026,   | 253962, | 2670.9335, |
| 6.686525 |         |            | 6.680645 |         |            | 6.674764 |         |            |
| 19951,   | 256638, | 2675.5780, | 19989,   | 256134, | 2673.2248, | 20027,   | 254544, | 2670.8715, |
| 6.686371 |         |            | 6.680490 |         |            | 6.674609 |         |            |
| 19952,   | 256400, | 2675.5160, | 19990,   | 256170, | 2673.1628, | 20028,   | 254822, | 2670.8096, |
| 6.686216 |         |            | 6.680335 |         |            | 6.674454 |         |            |
| 19953,   | 256188, | 2675.4541, | 19991,   | 255922, | 2673.1009, | 20029,   | 254838, | 2670.7477, |
| 6.686061 |         |            | 6.680180 |         |            | 6.674300 |         |            |
| 19954,   | 256060, | 2675.3922, | 19992,   | 255828, | 2673.0390, | 20030,   | 254954, | 2670.6857, |
| 6.685906 |         |            | 6.680026 |         |            | 6.674145 |         |            |
| 19955,   | 256032, | 2675.3303, | 19993,   | 256074, | 2672.9770, | 20031,   | 255444, | 2670.6238, |
| 6.685752 |         |            | 6.679871 |         |            | 6.673990 |         |            |
| 19956,   | 255994, | 2675.2683, | 19994,   | 256334, | 2672.9151, | 20032,   | 256232, | 2670.5619, |
| 6.685597 |         |            | 6.679716 |         |            | 6.673835 |         |            |
| 19957,   | 255854, | 2675.2064, | 19995,   | 256138, | 2672.8532, | 20033,   | 257022, | 2670.5000, |
| 6.685442 |         |            | 6.679561 |         |            | 6.673681 |         |            |
| 19958,   | 255694, | 2675.1445, | 19996,   | 255428, | 2672.7913, | 20034,   | 257612, | 2670.4380, |
| 6.685287 |         |            | 6.679407 |         |            | 6.673526 |         |            |

|          |         |            |          |         |            |          |         |            |
|----------|---------|------------|----------|---------|------------|----------|---------|------------|
| 20035,   | 258026, | 2670.3761, | 20073,   | 257998, | 2668.0229, | 20111,   | 259392, | 2665.6697, |
| 6.673371 |         |            | 6.667490 |         |            | 6.661609 |         |            |
| 20036,   | 258336, | 2670.3142, | 20074,   | 257988, | 2667.9610, | 20112,   | 259828, | 2665.6077, |
| 6.673216 |         |            | 6.667335 |         |            | 6.661455 |         |            |
| 20037,   | 258512, | 2670.2523, | 20075,   | 258132, | 2667.8990, | 20113,   | 260218, | 2665.5458, |
| 6.673062 |         |            | 6.667181 |         |            | 6.661300 |         |            |
| 20038,   | 258456, | 2670.1903, | 20076,   | 258490, | 2667.8371, | 20114,   | 260374, | 2665.4839, |
| 6.672907 |         |            | 6.667026 |         |            | 6.661145 |         |            |
| 20039,   | 258196, | 2670.1284, | 20077,   | 259050, | 2667.7752, | 20115,   | 260328, | 2665.4220, |
| 6.672752 |         |            | 6.666871 |         |            | 6.660990 |         |            |
| 20040,   | 257950, | 2670.0665, | 20078,   | 259706, | 2667.7133, | 20116,   | 260312, | 2665.3600, |
| 6.672597 |         |            | 6.666716 |         |            | 6.660836 |         |            |
| 20041,   | 257862, | 2670.0046, | 20079,   | 260202, | 2667.6513, | 20117,   | 260468, | 2665.2981, |
| 6.672442 |         |            | 6.666562 |         |            | 6.660681 |         |            |
| 20042,   | 257792, | 2669.9426, | 20080,   | 260204, | 2667.5894, | 20118,   | 260684, | 2665.2362, |
| 6.672288 |         |            | 6.666407 |         |            | 6.660526 |         |            |
| 20043,   | 257390, | 2669.8807, | 20081,   | 259534, | 2667.5275, | 20119,   | 260696, | 2665.1743, |
| 6.672133 |         |            | 6.666252 |         |            | 6.660371 |         |            |
| 20044,   | 256492, | 2669.8188, | 20082,   | 258398, | 2667.4655, | 20120,   | 260424, | 2665.1123, |
| 6.671978 |         |            | 6.666097 |         |            | 6.660217 |         |            |
| 20045,   | 255372, | 2669.7568, | 20083,   | 257306, | 2667.4036, | 20121,   | 260052, | 2665.0504, |
| 6.671823 |         |            | 6.665943 |         |            | 6.660062 |         |            |
| 20046,   | 254594, | 2669.6949, | 20084,   | 256698, | 2667.3417, | 20122,   | 259828, | 2664.9885, |
| 6.671669 |         |            | 6.665788 |         |            | 6.659907 |         |            |
| 20047,   | 254514, | 2669.6330, | 20085,   | 256622, | 2667.2798, | 20123,   | 259754, | 2664.9265, |
| 6.671514 |         |            | 6.665633 |         |            | 6.659752 |         |            |
| 20048,   | 255016, | 2669.5711, | 20086,   | 256794, | 2667.2178, | 20124,   | 259576, | 2664.8646, |
| 6.671359 |         |            | 6.665478 |         |            | 6.659598 |         |            |
| 20049,   | 255670, | 2669.5091, | 20087,   | 256934, | 2667.1559, | 20125,   | 259110, | 2664.8027, |
| 6.671204 |         |            | 6.665324 |         |            | 6.659443 |         |            |
| 20050,   | 256170, | 2669.4472, | 20088,   | 257038, | 2667.0940, | 20126,   | 258482, | 2664.7408, |
| 6.671050 |         |            | 6.665169 |         |            | 6.659288 |         |            |
| 20051,   | 256528, | 2669.3853, | 20089,   | 257252, | 2667.0321, | 20127,   | 258050, | 2664.6788, |
| 6.670895 |         |            | 6.665014 |         |            | 6.659133 |         |            |
| 20052,   | 256882, | 2669.3234, | 20090,   | 257548, | 2666.9701, | 20128,   | 258046, | 2664.6169, |
| 6.670740 |         |            | 6.664859 |         |            | 6.658979 |         |            |
| 20053,   | 257242, | 2669.2614, | 20091,   | 257626, | 2666.9082, | 20129,   | 258356, | 2664.5550, |
| 6.670585 |         |            | 6.664705 |         |            | 6.658824 |         |            |
| 20054,   | 257420, | 2669.1995, | 20092,   | 257224, | 2666.8463, | 20130,   | 258684, | 2664.4931, |
| 6.670431 |         |            | 6.664550 |         |            | 6.658669 |         |            |
| 20055,   | 257330, | 2669.1376, | 20093,   | 256480, | 2666.7844, | 20131,   | 258874, | 2664.4311, |
| 6.670276 |         |            | 6.664395 |         |            | 6.658514 |         |            |
| 20056,   | 257170, | 2669.0756, | 20094,   | 255920, | 2666.7224, | 20132,   | 259018, | 2664.3692, |
| 6.670121 |         |            | 6.664240 |         |            | 6.658360 |         |            |
| 20057,   | 257274, | 2669.0137, | 20095,   | 255978, | 2666.6605, | 20133,   | 259260, | 2664.3073, |
| 6.669966 |         |            | 6.664086 |         |            | 6.658205 |         |            |
| 20058,   | 257752, | 2668.9518, | 20096,   | 256572, | 2666.5986, | 20134,   | 259550, | 2664.2453, |
| 6.669812 |         |            | 6.663931 |         |            | 6.658050 |         |            |
| 20059,   | 258336, | 2668.8899, | 20097,   | 257136, | 2666.5366, | 20135,   | 259676, | 2664.1834, |
| 6.669657 |         |            | 6.663776 |         |            | 6.657895 |         |            |
| 20060,   | 258618, | 2668.8279, | 20098,   | 257178, | 2666.4747, | 20136,   | 259538, | 2664.1215, |
| 6.669502 |         |            | 6.663621 |         |            | 6.657741 |         |            |
| 20061,   | 258426, | 2668.7660, | 20099,   | 256736, | 2666.4128, | 20137,   | 259292, | 2664.0596, |
| 6.669347 |         |            | 6.663467 |         |            | 6.657586 |         |            |
| 20062,   | 257948, | 2668.7041, | 20100,   | 256282, | 2666.3509, | 20138,   | 259190, | 2663.9976, |
| 6.669193 |         |            | 6.663312 |         |            | 6.657431 |         |            |
| 20063,   | 257478, | 2668.6422, | 20101,   | 256242, | 2666.2889, | 20139,   | 259324, | 2663.9357, |
| 6.669038 |         |            | 6.663157 |         |            | 6.657276 |         |            |
| 20064,   | 257126, | 2668.5802, | 20102,   | 256610, | 2666.2270, | 20140,   | 259540, | 2663.8738, |
| 6.668883 |         |            | 6.663002 |         |            | 6.657121 |         |            |
| 20065,   | 256798, | 2668.5183, | 20103,   | 257042, | 2666.1651, | 20141,   | 259686, | 2663.8119, |
| 6.668728 |         |            | 6.662848 |         |            | 6.656967 |         |            |
| 20066,   | 256418, | 2668.4564, | 20104,   | 257282, | 2666.1032, | 20142,   | 259812, | 2663.7499, |
| 6.668574 |         |            | 6.662693 |         |            | 6.656812 |         |            |
| 20067,   | 256130, | 2668.3945, | 20105,   | 257400, | 2666.0412, | 20143,   | 260112, | 2663.6880, |
| 6.668419 |         |            | 6.662538 |         |            | 6.656657 |         |            |
| 20068,   | 256178, | 2668.3325, | 20106,   | 257630, | 2665.9793, | 20144,   | 260588, | 2663.6261, |
| 6.668264 |         |            | 6.662383 |         |            | 6.656502 |         |            |
| 20069,   | 256632, | 2668.2706, | 20107,   | 258048, | 2665.9174, | 20145,   | 260940, | 2663.5642, |
| 6.668109 |         |            | 6.662228 |         |            | 6.656348 |         |            |
| 20070,   | 257282, | 2668.2087, | 20108,   | 258502, | 2665.8554, | 20146,   | 260792, | 2663.5022, |
| 6.667955 |         |            | 6.662074 |         |            | 6.656193 |         |            |
| 20071,   | 257792, | 2668.1467, | 20109,   | 258832, | 2665.7935, | 20147,   | 260126, | 2663.4403, |
| 6.667800 |         |            | 6.661919 |         |            | 6.656038 |         |            |
| 20072,   | 258004, | 2668.0848, | 20110,   | 259076, | 2665.7316, | 20148,   | 259366, | 2663.3784, |
| 6.667645 |         |            | 6.661764 |         |            | 6.655883 |         |            |

|          |         |            |          |         |            |          |         |            |
|----------|---------|------------|----------|---------|------------|----------|---------|------------|
| 20149,   | 258994, | 2663.3164, | 20187,   | 261160, | 2660.9632, | 20225,   | 261310, | 2658.6100, |
| 6.655729 |         |            | 6.649848 |         |            | 6.643967 |         |            |
| 20150,   | 259122, | 2663.2545, | 20188,   | 261402, | 2660.9013, | 20226,   | 262096, | 2658.5481, |
| 6.655574 |         |            | 6.649693 |         |            | 6.643812 |         |            |
| 20151,   | 259412, | 2663.1926, | 20189,   | 261836, | 2660.8394, | 20227,   | 262442, | 2658.4861, |
| 6.655419 |         |            | 6.649538 |         |            | 6.643658 |         |            |
| 20152,   | 259454, | 2663.1307, | 20190,   | 262106, | 2660.7774, | 20228,   | 262154, | 2658.4242, |
| 6.655264 |         |            | 6.649384 |         |            | 6.643503 |         |            |
| 20153,   | 259186, | 2663.0687, | 20191,   | 262116, | 2660.7155, | 20229,   | 261558, | 2658.3623, |
| 6.655110 |         |            | 6.649229 |         |            | 6.643348 |         |            |
| 20154,   | 258906, | 2663.0068, | 20192,   | 262026, | 2660.6536, | 20230,   | 261240, | 2658.3004, |
| 6.654955 |         |            | 6.649074 |         |            | 6.643193 |         |            |
| 20155,   | 258932, | 2662.9449, | 20193,   | 261996, | 2660.5917, | 20231,   | 261420, | 2658.2384, |
| 6.654800 |         |            | 6.648919 |         |            | 6.643039 |         |            |
| 20156,   | 259324, | 2662.8830, | 20194,   | 261948, | 2660.5297, | 20232,   | 261734, | 2658.1765, |
| 6.654645 |         |            | 6.648765 |         |            | 6.642884 |         |            |
| 20157,   | 259876, | 2662.8210, | 20195,   | 261706, | 2660.4678, | 20233,   | 261630, | 2658.1146, |
| 6.654491 |         |            | 6.648610 |         |            | 6.642729 |         |            |
| 20158,   | 260394, | 2662.7591, | 20196,   | 261252, | 2660.4059, | 20234,   | 260996, | 2658.0527, |
| 6.654336 |         |            | 6.648455 |         |            | 6.642574 |         |            |
| 20159,   | 260782, | 2662.6972, | 20197,   | 260764, | 2660.3440, | 20235,   | 260248, | 2657.9907, |
| 6.654181 |         |            | 6.648300 |         |            | 6.642419 |         |            |
| 20160,   | 261006, | 2662.6352, | 20198,   | 260332, | 2660.2820, | 20236,   | 259882, | 2657.9288, |
| 6.654026 |         |            | 6.648146 |         |            | 6.642265 |         |            |
| 20161,   | 260964, | 2662.5733, | 20199,   | 259810, | 2660.2201, | 20237,   | 259942, | 2657.8669, |
| 6.653872 |         |            | 6.647991 |         |            | 6.642110 |         |            |
| 20162,   | 260626, | 2662.5114, | 20200,   | 259014, | 2660.1582, | 20238,   | 260054, | 2657.8050, |
| 6.653717 |         |            | 6.647836 |         |            | 6.641955 |         |            |
| 20163,   | 260172, | 2662.4495, | 20201,   | 258096, | 2660.0962, | 20239,   | 259952, | 2657.7430, |
| 6.653562 |         |            | 6.647681 |         |            | 6.641800 |         |            |
| 20164,   | 259958, | 2662.3875, | 20202,   | 257570, | 2660.0343, | 20240,   | 259822, | 2657.6811, |
| 6.653407 |         |            | 6.647527 |         |            | 6.641646 |         |            |
| 20165,   | 260184, | 2662.3256, | 20203,   | 257876, | 2659.9724, | 20241,   | 260078, | 2657.6192, |
| 6.653253 |         |            | 6.647372 |         |            | 6.641491 |         |            |
| 20166,   | 260636, | 2662.2637, | 20204,   | 258850, | 2659.9105, | 20242,   | 260832, | 2657.5572, |
| 6.653098 |         |            | 6.647217 |         |            | 6.641336 |         |            |
| 20167,   | 260860, | 2662.2018, | 20205,   | 259760, | 2659.8485, | 20243,   | 261696, | 2657.4953, |
| 6.652943 |         |            | 6.647062 |         |            | 6.641181 |         |            |
| 20168,   | 260612, | 2662.1398, | 20206,   | 259902, | 2659.7866, | 20244,   | 262210, | 2657.4334, |
| 6.652788 |         |            | 6.646907 |         |            | 6.641027 |         |            |
| 20169,   | 260128, | 2662.0779, | 20207,   | 259204, | 2659.7247, | 20245,   | 262332, | 2657.3715, |
| 6.652634 |         |            | 6.646753 |         |            | 6.640872 |         |            |
| 20170,   | 259872, | 2662.0160, | 20208,   | 258220, | 2659.6628, | 20246,   | 262448, | 2657.3095, |
| 6.652479 |         |            | 6.646598 |         |            | 6.640717 |         |            |
| 20171,   | 259994, | 2661.9541, | 20209,   | 257574, | 2659.6008, | 20247,   | 262830, | 2657.2476, |
| 6.652324 |         |            | 6.646443 |         |            | 6.640562 |         |            |
| 20172,   | 260116, | 2661.8921, | 20210,   | 257430, | 2659.5389, | 20248,   | 263232, | 2657.1857, |
| 6.652169 |         |            | 6.646288 |         |            | 6.640408 |         |            |
| 20173,   | 259762, | 2661.8302, | 20211,   | 257562, | 2659.4770, | 20249,   | 263066, | 2657.1238, |
| 6.652014 |         |            | 6.646134 |         |            | 6.640253 |         |            |
| 20174,   | 258924, | 2661.7683, | 20212,   | 257792, | 2659.4151, | 20250,   | 262064, | 2657.0618, |
| 6.651860 |         |            | 6.645979 |         |            | 6.640098 |         |            |
| 20175,   | 258164, | 2661.7063, | 20213,   | 258220, | 2659.3531, | 20251,   | 260626, | 2656.9999, |
| 6.651705 |         |            | 6.645824 |         |            | 6.639943 |         |            |
| 20176,   | 258102, | 2661.6444, | 20214,   | 258966, | 2659.2912, | 20252,   | 259484, | 2656.9380, |
| 6.651550 |         |            | 6.645669 |         |            | 6.639789 |         |            |
| 20177,   | 258762, | 2661.5825, | 20215,   | 259826, | 2659.2293, | 20253,   | 259054, | 2656.8760, |
| 6.651395 |         |            | 6.645515 |         |            | 6.639634 |         |            |
| 20178,   | 259544, | 2661.5206, | 20216,   | 260276, | 2659.1673, | 20254,   | 259128, | 2656.8141, |
| 6.651241 |         |            | 6.645360 |         |            | 6.639479 |         |            |
| 20179,   | 259874, | 2661.4586, | 20217,   | 259972, | 2659.1054, | 20255,   | 259260, | 2656.7522, |
| 6.651086 |         |            | 6.645205 |         |            | 6.639324 |         |            |
| 20180,   | 259746, | 2661.3967, | 20218,   | 259152, | 2659.0435, | 20256,   | 259270, | 2656.6903, |
| 6.650931 |         |            | 6.645050 |         |            | 6.639170 |         |            |
| 20181,   | 259696, | 2661.3348, | 20219,   | 258462, | 2658.9816, | 20257,   | 259368, | 2656.6283, |
| 6.650776 |         |            | 6.644896 |         |            | 6.639015 |         |            |
| 20182,   | 260144, | 2661.2729, | 20220,   | 258380, | 2658.9196, | 20258,   | 259732, | 2656.5664, |
| 6.650622 |         |            | 6.644741 |         |            | 6.638860 |         |            |
| 20183,   | 260944, | 2661.2109, | 20221,   | 258842, | 2658.8577, | 20259,   | 260158, | 2656.5045, |
| 6.650467 |         |            | 6.644586 |         |            | 6.638705 |         |            |
| 20184,   | 261548, | 2661.1490, | 20222,   | 259446, | 2658.7958, | 20260,   | 260216, | 2656.4426, |
| 6.650312 |         |            | 6.644431 |         |            | 6.638551 |         |            |
| 20185,   | 261604, | 2661.0871, | 20223,   | 259974, | 2658.7339, | 20261,   | 259738, | 2656.3806, |
| 6.650157 |         |            | 6.644277 |         |            | 6.638396 |         |            |
| 20186,   | 261312, | 2661.0251, | 20224,   | 260542, | 2658.6719, | 20262,   | 259064, | 2656.3187, |
| 6.650003 |         |            | 6.644122 |         |            | 6.638241 |         |            |

|          |         |            |          |         |            |          |         |            |
|----------|---------|------------|----------|---------|------------|----------|---------|------------|
| 20263,   | 258750, | 2656.2568, | 20301,   | 260358, | 2653.9036, | 20339,   | 261450, | 2651.5503, |
| 6.638086 |         |            | 6.632205 |         |            | 6.626325 |         |            |
| 20264,   | 259010, | 2656.1949, | 20302,   | 260916, | 2653.8416, | 20340,   | 261214, | 2651.4884, |
| 6.637932 |         |            | 6.632051 |         |            | 6.626170 |         |            |
| 20265,   | 259560, | 2656.1329, | 20303,   | 261340, | 2653.7797, | 20341,   | 260856, | 2651.4265, |
| 6.637777 |         |            | 6.631896 |         |            | 6.626015 |         |            |
| 20266,   | 259962, | 2656.0710, | 20304,   | 261444, | 2653.7178, | 20342,   | 260516, | 2651.3646, |
| 6.637622 |         |            | 6.631741 |         |            | 6.625860 |         |            |
| 20267,   | 260066, | 2656.0091, | 20305,   | 261406, | 2653.6558, | 20343,   | 260490, | 2651.3026, |
| 6.637467 |         |            | 6.631586 |         |            | 6.625706 |         |            |
| 20268,   | 260046, | 2655.9471, | 20306,   | 261526, | 2653.5939, | 20344,   | 260942, | 2651.2407, |
| 6.637312 |         |            | 6.631432 |         |            | 6.625551 |         |            |
| 20269,   | 260050, | 2655.8852, | 20307,   | 261814, | 2653.5320, | 20345,   | 261670, | 2651.1788, |
| 6.637158 |         |            | 6.631277 |         |            | 6.625396 |         |            |
| 20270,   | 259966, | 2655.8233, | 20308,   | 261926, | 2653.4701, | 20346,   | 262276, | 2651.1168, |
| 6.637003 |         |            | 6.631122 |         |            | 6.625241 |         |            |
| 20271,   | 259570, | 2655.7614, | 20309,   | 261524, | 2653.4081, | 20347,   | 262514, | 2651.0549, |
| 6.636848 |         |            | 6.630967 |         |            | 6.625087 |         |            |
| 20272,   | 258912, | 2655.6994, | 20310,   | 260664, | 2653.3462, | 20348,   | 262534, | 2650.9930, |
| 6.636693 |         |            | 6.630813 |         |            | 6.624932 |         |            |
| 20273,   | 258388, | 2655.6375, | 20311,   | 259800, | 2653.2843, | 20349,   | 262646, | 2650.9311, |
| 6.636539 |         |            | 6.630658 |         |            | 6.624777 |         |            |
| 20274,   | 258380, | 2655.5756, | 20312,   | 259386, | 2653.2224, | 20350,   | 262934, | 2650.8691, |
| 6.636384 |         |            | 6.630503 |         |            | 6.624622 |         |            |
| 20275,   | 258844, | 2655.5137, | 20313,   | 259484, | 2653.1604, | 20351,   | 263100, | 2650.8072, |
| 6.636229 |         |            | 6.630348 |         |            | 6.624468 |         |            |
| 20276,   | 259328, | 2655.4517, | 20314,   | 259822, | 2653.0985, | 20352,   | 262796, | 2650.7453, |
| 6.636074 |         |            | 6.630194 |         |            | 6.624313 |         |            |
| 20277,   | 259416, | 2655.3898, | 20315,   | 260172, | 2653.0366, | 20353,   | 262022, | 2650.6834, |
| 6.635920 |         |            | 6.630039 |         |            | 6.624158 |         |            |
| 20278,   | 259094, | 2655.3279, | 20316,   | 260536, | 2652.9747, | 20354,   | 261196, | 2650.6214, |
| 6.635765 |         |            | 6.629884 |         |            | 6.624003 |         |            |
| 20279,   | 258654, | 2655.2659, | 20317,   | 261034, | 2652.9127, | 20355,   | 260758, | 2650.5595, |
| 6.635610 |         |            | 6.629729 |         |            | 6.623849 |         |            |
| 20280,   | 258338, | 2655.2040, | 20318,   | 261572, | 2652.8508, | 20356,   | 260814, | 2650.4976, |
| 6.635455 |         |            | 6.629575 |         |            | 6.623694 |         |            |
| 20281,   | 258070, | 2655.1421, | 20319,   | 261856, | 2652.7889, | 20357,   | 261124, | 2650.4356, |
| 6.635301 |         |            | 6.629420 |         |            | 6.623539 |         |            |
| 20282,   | 257706, | 2655.0802, | 20320,   | 261690, | 2652.7269, | 20358,   | 261448, | 2650.3737, |
| 6.635146 |         |            | 6.629265 |         |            | 6.623384 |         |            |
| 20283,   | 257316, | 2655.0182, | 20321,   | 261252, | 2652.6650, | 20359,   | 261762, | 2650.3118, |
| 6.634991 |         |            | 6.629110 |         |            | 6.623230 |         |            |
| 20284,   | 257252, | 2654.9563, | 20322,   | 260956, | 2652.6031, | 20360,   | 262164, | 2650.2499, |
| 6.634836 |         |            | 6.628956 |         |            | 6.623075 |         |            |
| 20285,   | 257772, | 2654.8944, | 20323,   | 261062, | 2652.5412, | 20361,   | 262620, | 2650.1879, |
| 6.634682 |         |            | 6.628801 |         |            | 6.622920 |         |            |
| 20286,   | 258742, | 2654.8325, | 20324,   | 261408, | 2652.4792, | 20362,   | 262946, | 2650.1260, |
| 6.634527 |         |            | 6.628646 |         |            | 6.622765 |         |            |
| 20287,   | 259728, | 2654.7705, | 20325,   | 261628, | 2652.4173, | 20363,   | 263062, | 2650.0641, |
| 6.634372 |         |            | 6.628491 |         |            | 6.622611 |         |            |
| 20288,   | 260418, | 2654.7086, | 20326,   | 261556, | 2652.3554, | 20364,   | 263162, | 2650.0022, |
| 6.634217 |         |            | 6.628337 |         |            | 6.622456 |         |            |
| 20289,   | 260890, | 2654.6467, | 20327,   | 261392, | 2652.2935, | 20365,   | 263512, | 2649.9402, |
| 6.634063 |         |            | 6.628182 |         |            | 6.622301 |         |            |
| 20290,   | 261444, | 2654.5848, | 20328,   | 261456, | 2652.2315, | 20366,   | 264078, | 2649.8783, |
| 6.633908 |         |            | 6.628027 |         |            | 6.622146 |         |            |
| 20291,   | 262208, | 2654.5228, | 20329,   | 261816, | 2652.1696, | 20367,   | 264430, | 2649.8164, |
| 6.633753 |         |            | 6.627872 |         |            | 6.621991 |         |            |
| 20292,   | 262962, | 2654.4609, | 20330,   | 262196, | 2652.1077, | 20368,   | 264144, | 2649.7545, |
| 6.633598 |         |            | 6.627718 |         |            | 6.621837 |         |            |
| 20293,   | 263362, | 2654.3990, | 20331,   | 262314, | 2652.0457, | 20369,   | 263286, | 2649.6925, |
| 6.633444 |         |            | 6.627563 |         |            | 6.621682 |         |            |
| 20294,   | 263266, | 2654.3370, | 20332,   | 262144, | 2651.9838, | 20370,   | 262400, | 2649.6306, |
| 6.633289 |         |            | 6.627408 |         |            | 6.621527 |         |            |
| 20295,   | 262814, | 2654.2751, | 20333,   | 261920, | 2651.9219, | 20371,   | 261994, | 2649.5687, |
| 6.633134 |         |            | 6.627253 |         |            | 6.621372 |         |            |
| 20296,   | 262202, | 2654.2132, | 20334,   | 261838, | 2651.8600, | 20372,   | 262026, | 2649.5067, |
| 6.632979 |         |            | 6.627098 |         |            | 6.621218 |         |            |
| 20297,   | 261520, | 2654.1513, | 20335,   | 261874, | 2651.7980, | 20373,   | 262016, | 2649.4448, |
| 6.632825 |         |            | 6.626944 |         |            | 6.621063 |         |            |
| 20298,   | 260818, | 2654.0893, | 20336,   | 261878, | 2651.7361, | 20374,   | 261662, | 2649.3829, |
| 6.632670 |         |            | 6.626789 |         |            | 6.620908 |         |            |
| 20299,   | 260244, | 2654.0274, | 20337,   | 261774, | 2651.6742, | 20375,   | 261248, | 2649.3210, |
| 6.632515 |         |            | 6.626634 |         |            | 6.620753 |         |            |
| 20300,   | 260054, | 2653.9655, | 20338,   | 261618, | 2651.6123, | 20376,   | 261380, | 2649.2590, |
| 6.632360 |         |            | 6.626479 |         |            | 6.620599 |         |            |

|          |         |            |          |         |            |          |         |            |
|----------|---------|------------|----------|---------|------------|----------|---------|------------|
| 20377,   | 262280, | 2649.1971, | 20415,   | 262968, | 2646.8439, | 20453,   | 263924, | 2644.4907, |
| 6.620444 |         |            | 6.614563 |         |            | 6.608682 |         |            |
| 20378,   | 263454, | 2649.1352, | 20416,   | 263464, | 2646.7820, | 20454,   | 264332, | 2644.4287, |
| 6.620289 |         |            | 6.614408 |         |            | 6.608528 |         |            |
| 20379,   | 264112, | 2649.0733, | 20417,   | 263416, | 2646.7200, | 20455,   | 264572, | 2644.3668, |
| 6.620134 |         |            | 6.614254 |         |            | 6.608373 |         |            |
| 20380,   | 263926, | 2649.0113, | 20418,   | 262860, | 2646.6581, | 20456,   | 264492, | 2644.3049, |
| 6.619980 |         |            | 6.614099 |         |            | 6.608218 |         |            |
| 20381,   | 263288, | 2648.9494, | 20419,   | 262304, | 2646.5962, | 20457,   | 264346, | 2644.2430, |
| 6.619825 |         |            | 6.613944 |         |            | 6.608063 |         |            |
| 20382,   | 262872, | 2648.8875, | 20420,   | 262234, | 2646.5343, | 20458,   | 264454, | 2644.1810, |
| 6.619670 |         |            | 6.613789 |         |            | 6.607909 |         |            |
| 20383,   | 262938, | 2648.8255, | 20421,   | 262584, | 2646.4723, | 20459,   | 264786, | 2644.1191, |
| 6.619515 |         |            | 6.613635 |         |            | 6.607754 |         |            |
| 20384,   | 263158, | 2648.7636, | 20422,   | 262880, | 2646.4104, | 20460,   | 265004, | 2644.0572, |
| 6.619361 |         |            | 6.613480 |         |            | 6.607599 |         |            |
| 20385,   | 263126, | 2648.7017, | 20423,   | 262800, | 2646.3485, | 20461,   | 264868, | 2643.9953, |
| 6.619206 |         |            | 6.613325 |         |            | 6.607444 |         |            |
| 20386,   | 262844, | 2648.6398, | 20424,   | 262584, | 2646.2865, | 20462,   | 264546, | 2643.9333, |
| 6.619051 |         |            | 6.613170 |         |            | 6.607290 |         |            |
| 20387,   | 262696, | 2648.5778, | 20425,   | 262762, | 2646.2246, | 20463,   | 264420, | 2643.8714, |
| 6.618896 |         |            | 6.613016 |         |            | 6.607135 |         |            |
| 20388,   | 262946, | 2648.5159, | 20426,   | 263502, | 2646.1627, | 20464,   | 264660, | 2643.8095, |
| 6.618742 |         |            | 6.612861 |         |            | 6.606980 |         |            |
| 20389,   | 263368, | 2648.4540, | 20427,   | 264376, | 2646.1008, | 20465,   | 265004, | 2643.7475, |
| 6.618587 |         |            | 6.612706 |         |            | 6.606825 |         |            |
| 20390,   | 263494, | 2648.3921, | 20428,   | 264774, | 2646.0388, | 20466,   | 265048, | 2643.6856, |
| 6.618432 |         |            | 6.612551 |         |            | 6.606670 |         |            |
| 20391,   | 263130, | 2648.3301, | 20429,   | 264572, | 2645.9769, | 20467,   | 264660, | 2643.6237, |
| 6.618277 |         |            | 6.612397 |         |            | 6.606516 |         |            |
| 20392,   | 262596, | 2648.2682, | 20430,   | 264258, | 2645.9150, | 20468,   | 264096, | 2643.5618, |
| 6.618123 |         |            | 6.612242 |         |            | 6.606361 |         |            |
| 20393,   | 262360, | 2648.2063, | 20431,   | 264414, | 2645.8531, | 20469,   | 263694, | 2643.4998, |
| 6.617968 |         |            | 6.612087 |         |            | 6.606206 |         |            |
| 20394,   | 262540, | 2648.1444, | 20432,   | 265076, | 2645.7911, | 20470,   | 263562, | 2643.4379, |
| 6.617813 |         |            | 6.611932 |         |            | 6.606051 |         |            |
| 20395,   | 262812, | 2648.0824, | 20433,   | 265716, | 2645.7292, | 20471,   | 263578, | 2643.3760, |
| 6.617658 |         |            | 6.611777 |         |            | 6.605897 |         |            |
| 20396,   | 262780, | 2648.0205, | 20434,   | 265788, | 2645.6673, | 20472,   | 263666, | 2643.3141, |
| 6.617504 |         |            | 6.611623 |         |            | 6.605742 |         |            |
| 20397,   | 262416, | 2647.9586, | 20435,   | 265282, | 2645.6054, | 20473,   | 263918, | 2643.2521, |
| 6.617349 |         |            | 6.611468 |         |            | 6.605587 |         |            |
| 20398,   | 262020, | 2647.8966, | 20436,   | 264698, | 2645.5434, | 20474,   | 264404, | 2643.1902, |
| 6.617194 |         |            | 6.611313 |         |            | 6.605432 |         |            |
| 20399,   | 261878, | 2647.8347, | 20437,   | 264520, | 2645.4815, | 20475,   | 264944, | 2643.1283, |
| 6.617039 |         |            | 6.611158 |         |            | 6.605278 |         |            |
| 20400,   | 261972, | 2647.7728, | 20438,   | 264828, | 2645.4196, | 20476,   | 265152, | 2643.0663, |
| 6.616884 |         |            | 6.611004 |         |            | 6.605123 |         |            |
| 20401,   | 262096, | 2647.7109, | 20439,   | 265378, | 2645.3576, | 20477,   | 264830, | 2643.0044, |
| 6.616730 |         |            | 6.610849 |         |            | 6.604968 |         |            |
| 20402,   | 262144, | 2647.6489, | 20440,   | 265964, | 2645.2957, | 20478,   | 264238, | 2642.9425, |
| 6.616575 |         |            | 6.610694 |         |            | 6.604813 |         |            |
| 20403,   | 262170, | 2647.5870, | 20441,   | 266602, | 2645.2338, | 20479,   | 263854, | 2642.8806, |
| 6.616420 |         |            | 6.610539 |         |            | 6.604659 |         |            |
| 20404,   | 262236, | 2647.5251, | 20442,   | 267338, | 2645.1719, | 20480,   | 263918, | 2642.8186, |
| 6.616265 |         |            | 6.610385 |         |            | 6.604504 |         |            |
| 20405,   | 262226, | 2647.4632, | 20443,   | 268026, | 2645.1099, | 20481,   | 264168, | 2642.7567, |
| 6.616111 |         |            | 6.610230 |         |            | 6.604349 |         |            |
| 20406,   | 262012, | 2647.4012, | 20444,   | 268404, | 2645.0480, | 20482,   | 264144, | 2642.6948, |
| 6.615956 |         |            | 6.610075 |         |            | 6.604194 |         |            |
| 20407,   | 261658, | 2647.3393, | 20445,   | 268340, | 2644.9861, | 20483,   | 263690, | 2642.6329, |
| 6.615801 |         |            | 6.609920 |         |            | 6.604040 |         |            |
| 20408,   | 261456, | 2647.2774, | 20446,   | 267980, | 2644.9242, | 20484,   | 263106, | 2642.5709, |
| 6.615646 |         |            | 6.609766 |         |            | 6.603885 |         |            |
| 20409,   | 261616, | 2647.2154, | 20447,   | 267540, | 2644.8622, | 20485,   | 262786, | 2642.5090, |
| 6.615492 |         |            | 6.609611 |         |            | 6.603730 |         |            |
| 20410,   | 262016, | 2647.1535, | 20448,   | 267036, | 2644.8003, | 20486,   | 262766, | 2642.4471, |
| 6.615337 |         |            | 6.609456 |         |            | 6.603575 |         |            |
| 20411,   | 262284, | 2647.0916, | 20449,   | 266298, | 2644.7384, | 20487,   | 262728, | 2642.3852, |
| 6.615182 |         |            | 6.609301 |         |            | 6.603421 |         |            |
| 20412,   | 262254, | 2647.0297, | 20450,   | 265290, | 2644.6764, | 20488,   | 262402, | 2642.3232, |
| 6.615027 |         |            | 6.609147 |         |            | 6.603266 |         |            |
| 20413,   | 262164, | 2646.9677, | 20451,   | 264318, | 2644.6145, | 20489,   | 261950, | 2642.2613, |
| 6.614873 |         |            | 6.608992 |         |            | 6.603111 |         |            |
| 20414,   | 262394, | 2646.9058, | 20452,   | 263812, | 2644.5526, | 20490,   | 261816, | 2642.1994, |
| 6.614718 |         |            | 6.608837 |         |            | 6.602956 |         |            |

|          |         |            |          |         |            |          |         |            |
|----------|---------|------------|----------|---------|------------|----------|---------|------------|
| 20491,   | 262268, | 2642.1374, | 20529,   | 267292, | 2639.7842, | 20567,   | 270996, | 2637.4310, |
| 6.602802 |         |            | 6.596921 |         |            | 6.591040 |         |            |
| 20492,   | 263104, | 2642.0755, | 20530,   | 267152, | 2639.7223, | 20568,   | 271086, | 2637.3691, |
| 6.602647 |         |            | 6.596766 |         |            | 6.590885 |         |            |
| 20493,   | 263858, | 2642.0136, | 20531,   | 267008, | 2639.6604, | 20569,   | 270604, | 2637.3071, |
| 6.602492 |         |            | 6.596611 |         |            | 6.590730 |         |            |
| 20494,   | 264236, | 2641.9517, | 20532,   | 267170, | 2639.5984, | 20570,   | 269874, | 2637.2452, |
| 6.602337 |         |            | 6.596456 |         |            | 6.590576 |         |            |
| 20495,   | 264330, | 2641.8897, | 20533,   | 267800, | 2639.5365, | 20571,   | 269446, | 2637.1833, |
| 6.602183 |         |            | 6.596302 |         |            | 6.590421 |         |            |
| 20496,   | 264360, | 2641.8278, | 20534,   | 268578, | 2639.4746, | 20572,   | 269516, | 2637.1214, |
| 6.602028 |         |            | 6.596147 |         |            | 6.590266 |         |            |
| 20497,   | 264368, | 2641.7659, | 20535,   | 268850, | 2639.4127, | 20573,   | 269700, | 2637.0594, |
| 6.601873 |         |            | 6.595992 |         |            | 6.590111 |         |            |
| 20498,   | 264214, | 2641.7040, | 20536,   | 268274, | 2639.3507, | 20574,   | 269404, | 2636.9975, |
| 6.601718 |         |            | 6.595837 |         |            | 6.589957 |         |            |
| 20499,   | 263874, | 2641.6420, | 20537,   | 267260, | 2639.2888, | 20575,   | 268484, | 2636.9356, |
| 6.601563 |         |            | 6.595683 |         |            | 6.589802 |         |            |
| 20500,   | 263626, | 2641.5801, | 20538,   | 266680, | 2639.2269, | 20576,   | 267412, | 2636.8737, |
| 6.601409 |         |            | 6.595528 |         |            | 6.589647 |         |            |
| 20501,   | 263854, | 2641.5182, | 20539,   | 267098, | 2639.1650, | 20577,   | 266842, | 2636.8117, |
| 6.601254 |         |            | 6.595373 |         |            | 6.589492 |         |            |
| 20502,   | 264604, | 2641.4562, | 20540,   | 268192, | 2639.1030, | 20578,   | 266952, | 2636.7498, |
| 6.601099 |         |            | 6.595218 |         |            | 6.589338 |         |            |
| 20503,   | 265482, | 2641.3943, | 20541,   | 269058, | 2639.0411, | 20579,   | 267394, | 2636.6879, |
| 6.600944 |         |            | 6.595064 |         |            | 6.589183 |         |            |
| 20504,   | 265964, | 2641.3324, | 20542,   | 269082, | 2638.9792, | 20580,   | 267702, | 2636.6259, |
| 6.600790 |         |            | 6.594909 |         |            | 6.589028 |         |            |
| 20505,   | 265862, | 2641.2705, | 20543,   | 268454, | 2638.9172, | 20581,   | 267826, | 2636.5640, |
| 6.600635 |         |            | 6.594754 |         |            | 6.588873 |         |            |
| 20506,   | 265462, | 2641.2085, | 20544,   | 267922, | 2638.8553, | 20582,   | 268076, | 2636.5021, |
| 6.600480 |         |            | 6.594599 |         |            | 6.588719 |         |            |
| 20507,   | 265192, | 2641.1466, | 20545,   | 267988, | 2638.7934, | 20583,   | 268632, | 2636.4402, |
| 6.600325 |         |            | 6.594445 |         |            | 6.588564 |         |            |
| 20508,   | 265230, | 2641.0847, | 20546,   | 268488, | 2638.7315, | 20584,   | 269254, | 2636.3782, |
| 6.600171 |         |            | 6.594290 |         |            | 6.588409 |         |            |
| 20509,   | 265394, | 2641.0228, | 20547,   | 268862, | 2638.6695, | 20585,   | 269468, | 2636.3163, |
| 6.600016 |         |            | 6.594135 |         |            | 6.588254 |         |            |
| 20510,   | 265416, | 2640.9608, | 20548,   | 268828, | 2638.6076, | 20586,   | 269088, | 2636.2544, |
| 6.599861 |         |            | 6.593980 |         |            | 6.588100 |         |            |
| 20511,   | 265216, | 2640.8989, | 20549,   | 268596, | 2638.5457, | 20587,   | 268406, | 2636.1925, |
| 6.599706 |         |            | 6.593826 |         |            | 6.587945 |         |            |
| 20512,   | 264920, | 2640.8370, | 20550,   | 268570, | 2638.4838, | 20588,   | 267908, | 2636.1305, |
| 6.599552 |         |            | 6.593671 |         |            | 6.587790 |         |            |
| 20513,   | 264720, | 2640.7751, | 20551,   | 268814, | 2638.4218, | 20589,   | 267792, | 2636.0686, |
| 6.599397 |         |            | 6.593516 |         |            | 6.587635 |         |            |
| 20514,   | 264720, | 2640.7131, | 20552,   | 269028, | 2638.3599, | 20590,   | 267848, | 2636.0067, |
| 6.599242 |         |            | 6.593361 |         |            | 6.587481 |         |            |
| 20515,   | 264980, | 2640.6512, | 20553,   | 268926, | 2638.2980, | 20591,   | 267764, | 2635.9448, |
| 6.599087 |         |            | 6.593207 |         |            | 6.587326 |         |            |
| 20516,   | 265542, | 2640.5893, | 20554,   | 268558, | 2638.2360, | 20592,   | 267448, | 2635.8828, |
| 6.598933 |         |            | 6.593052 |         |            | 6.587171 |         |            |
| 20517,   | 266388, | 2640.5273, | 20555,   | 268192, | 2638.1741, | 20593,   | 267062, | 2635.8209, |
| 6.598778 |         |            | 6.592897 |         |            | 6.587016 |         |            |
| 20518,   | 267324, | 2640.4654, | 20556,   | 267958, | 2638.1122, | 20594,   | 266774, | 2635.7590, |
| 6.598623 |         |            | 6.592742 |         |            | 6.586861 |         |            |
| 20519,   | 268064, | 2640.4035, | 20557,   | 267680, | 2638.0503, | 20595,   | 266590, | 2635.6970, |
| 6.598468 |         |            | 6.592588 |         |            | 6.586707 |         |            |
| 20520,   | 268410, | 2640.3416, | 20558,   | 267202, | 2637.9883, | 20596,   | 266444, | 2635.6351, |
| 6.598314 |         |            | 6.592433 |         |            | 6.586552 |         |            |
| 20521,   | 268426, | 2640.2796, | 20559,   | 266666, | 2637.9264, | 20597,   | 266390, | 2635.5732, |
| 6.598159 |         |            | 6.592278 |         |            | 6.586397 |         |            |
| 20522,   | 268334, | 2640.2177, | 20560,   | 266496, | 2637.8645, | 20598,   | 266532, | 2635.5113, |
| 6.598004 |         |            | 6.592123 |         |            | 6.586242 |         |            |
| 20523,   | 268276, | 2640.1558, | 20561,   | 266946, | 2637.8026, | 20599,   | 266852, | 2635.4493, |
| 6.597849 |         |            | 6.591968 |         |            | 6.586088 |         |            |
| 20524,   | 268198, | 2640.0939, | 20562,   | 267840, | 2637.7406, | 20600,   | 267112, | 2635.3874, |
| 6.597695 |         |            | 6.591814 |         |            | 6.585933 |         |            |
| 20525,   | 267988, | 2640.0319, | 20563,   | 268744, | 2637.6787, | 20601,   | 267078, | 2635.3255, |
| 6.597540 |         |            | 6.591659 |         |            | 6.585778 |         |            |
| 20526,   | 267674, | 2639.9700, | 20564,   | 269402, | 2637.6168, | 20602,   | 266798, | 2635.2636, |
| 6.597385 |         |            | 6.591504 |         |            | 6.585623 |         |            |
| 20527,   | 267424, | 2639.9081, | 20565,   | 269930, | 2637.5549, | 20603,   | 266616, | 2635.2016, |
| 6.597230 |         |            | 6.591349 |         |            | 6.585469 |         |            |
| 20528,   | 267334, | 2639.8461, | 20566,   | 270494, | 2637.4929, | 20604,   | 266838, | 2635.1397, |
| 6.597075 |         |            | 6.591195 |         |            | 6.585314 |         |            |



|          |         |            |          |         |            |          |         |            |
|----------|---------|------------|----------|---------|------------|----------|---------|------------|
| 20605,   | 267414, | 2635.0778, | 20643,   | 266934, | 2632.7246, | 20681,   | 268148, | 2630.3713, |
| 6.585159 |         |            | 6.579278 |         |            | 6.573398 |         |            |
| 20606,   | 268022, | 2635.0158, | 20644,   | 267116, | 2632.6626, | 20682,   | 268426, | 2630.3094, |
| 6.585004 |         |            | 6.579124 |         |            | 6.573243 |         |            |
| 20607,   | 268404, | 2634.9539, | 20645,   | 267264, | 2632.6007, | 20683,   | 268354, | 2630.2475, |
| 6.584850 |         |            | 6.578969 |         |            | 6.573088 |         |            |
| 20608,   | 268638, | 2634.8920, | 20646,   | 267594, | 2632.5388, | 20684,   | 267852, | 2630.1856, |
| 6.584695 |         |            | 6.578814 |         |            | 6.572933 |         |            |
| 20609,   | 268976, | 2634.8301, | 20647,   | 268416, | 2632.4768, | 20685,   | 267206, | 2630.1236, |
| 6.584540 |         |            | 6.578659 |         |            | 6.572779 |         |            |
| 20610,   | 269468, | 2634.7681, | 20648,   | 269658, | 2632.4149, | 20686,   | 266736, | 2630.0617, |
| 6.584385 |         |            | 6.578505 |         |            | 6.572624 |         |            |
| 20611,   | 269898, | 2634.7062, | 20649,   | 270778, | 2632.3530, | 20687,   | 266478, | 2629.9998, |
| 6.584231 |         |            | 6.578350 |         |            | 6.572469 |         |            |
| 20612,   | 269996, | 2634.6443, | 20650,   | 271194, | 2632.2911, | 20688,   | 266336, | 2629.9378, |
| 6.584076 |         |            | 6.578195 |         |            | 6.572314 |         |            |
| 20613,   | 269816, | 2634.5824, | 20651,   | 270814, | 2632.2291, | 20689,   | 266312, | 2629.8759, |
| 6.583921 |         |            | 6.578040 |         |            | 6.572160 |         |            |
| 20614,   | 269686, | 2634.5204, | 20652,   | 270116, | 2632.1672, | 20690,   | 266578, | 2629.8140, |
| 6.583766 |         |            | 6.577886 |         |            | 6.572005 |         |            |
| 20615,   | 269846, | 2634.4585, | 20653,   | 269678, | 2632.1053, | 20691,   | 267246, | 2629.7521, |
| 6.583612 |         |            | 6.577731 |         |            | 6.571850 |         |            |
| 20616,   | 270156, | 2634.3966, | 20654,   | 269716, | 2632.0434, | 20692,   | 268156, | 2629.6901, |
| 6.583457 |         |            | 6.577576 |         |            | 6.571695 |         |            |
| 20617,   | 270280, | 2634.3347, | 20655,   | 270054, | 2631.9814, | 20693,   | 268972, | 2629.6282, |
| 6.583302 |         |            | 6.577421 |         |            | 6.571540 |         |            |
| 20618,   | 270070, | 2634.2727, | 20656,   | 270450, | 2631.9195, | 20694,   | 269478, | 2629.5663, |
| 6.583147 |         |            | 6.577267 |         |            | 6.571386 |         |            |
| 20619,   | 269754, | 2634.2108, | 20657,   | 270838, | 2631.8576, | 20695,   | 269724, | 2629.5044, |
| 6.582993 |         |            | 6.577112 |         |            | 6.571231 |         |            |
| 20620,   | 269650, | 2634.1489, | 20658,   | 271216, | 2631.7957, | 20696,   | 269834, | 2629.4424, |
| 6.582838 |         |            | 6.576957 |         |            | 6.571076 |         |            |
| 20621,   | 269774, | 2634.0869, | 20659,   | 271430, | 2631.7337, | 20697,   | 269802, | 2629.3805, |
| 6.582683 |         |            | 6.576802 |         |            | 6.570921 |         |            |
| 20622,   | 269808, | 2634.0250, | 20660,   | 271250, | 2631.6718, | 20698,   | 269514, | 2629.3186, |
| 6.582528 |         |            | 6.576647 |         |            | 6.570767 |         |            |
| 20623,   | 269480, | 2633.9631, | 20661,   | 270686, | 2631.6099, | 20699,   | 269024, | 2629.2566, |
| 6.582374 |         |            | 6.576493 |         |            | 6.570612 |         |            |
| 20624,   | 268928, | 2633.9012, | 20662,   | 270156, | 2631.5479, | 20700,   | 268656, | 2629.1947, |
| 6.582219 |         |            | 6.576338 |         |            | 6.570457 |         |            |
| 20625,   | 268598, | 2633.8392, | 20663,   | 270166, | 2631.4860, | 20701,   | 268750, | 2629.1328, |
| 6.582064 |         |            | 6.576183 |         |            | 6.570302 |         |            |
| 20626,   | 268796, | 2633.7773, | 20664,   | 270764, | 2631.4241, | 20702,   | 269236, | 2629.0709, |
| 6.581909 |         |            | 6.576028 |         |            | 6.570148 |         |            |
| 20627,   | 269372, | 2633.7154, | 20665,   | 271376, | 2631.3622, | 20703,   | 269594, | 2629.0089, |
| 6.581754 |         |            | 6.575874 |         |            | 6.569993 |         |            |
| 20628,   | 269920, | 2633.6535, | 20666,   | 271314, | 2631.3002, | 20704,   | 269302, | 2628.9470, |
| 6.581600 |         |            | 6.575719 |         |            | 6.569838 |         |            |
| 20629,   | 270196, | 2633.5915, | 20667,   | 270410, | 2631.2383, | 20705,   | 268366, | 2628.8851, |
| 6.581445 |         |            | 6.575564 |         |            | 6.569683 |         |            |
| 20630,   | 270298, | 2633.5296, | 20668,   | 269216, | 2631.1764, | 20706,   | 267358, | 2628.8232, |
| 6.581290 |         |            | 6.575409 |         |            | 6.569529 |         |            |
| 20631,   | 270434, | 2633.4677, | 20669,   | 268446, | 2631.1145, | 20707,   | 266896, | 2628.7612, |
| 6.581135 |         |            | 6.575255 |         |            | 6.569374 |         |            |
| 20632,   | 270548, | 2633.4058, | 20670,   | 268354, | 2631.0525, | 20708,   | 267082, | 2628.6993, |
| 6.580981 |         |            | 6.575100 |         |            | 6.569219 |         |            |
| 20633,   | 270360, | 2633.3438, | 20671,   | 268584, | 2630.9906, | 20709,   | 267516, | 2628.6374, |
| 6.580826 |         |            | 6.574945 |         |            | 6.569064 |         |            |
| 20634,   | 269734, | 2633.2819, | 20672,   | 268708, | 2630.9287, | 20710,   | 267784, | 2628.5755, |
| 6.580671 |         |            | 6.574790 |         |            | 6.568910 |         |            |
| 20635,   | 268942, | 2633.2200, | 20673,   | 268666, | 2630.8667, | 20711,   | 267908, | 2628.5135, |
| 6.580516 |         |            | 6.574636 |         |            | 6.568755 |         |            |
| 20636,   | 268438, | 2633.1580, | 20674,   | 268752, | 2630.8048, | 20712,   | 268268, | 2628.4516, |
| 6.580362 |         |            | 6.574481 |         |            | 6.568600 |         |            |
| 20637,   | 268386, | 2633.0961, | 20675,   | 269126, | 2630.7429, | 20713,   | 269096, | 2628.3897, |
| 6.580207 |         |            | 6.574326 |         |            | 6.568445 |         |            |
| 20638,   | 268492, | 2633.0342, | 20676,   | 269522, | 2630.6810, | 20714,   | 270186, | 2628.3277, |
| 6.580052 |         |            | 6.574171 |         |            | 6.568291 |         |            |
| 20639,   | 268314, | 2632.9723, | 20677,   | 269496, | 2630.6190, | 20715,   | 271058, | 2628.2658, |
| 6.579897 |         |            | 6.574017 |         |            | 6.568136 |         |            |
| 20640,   | 267750, | 2632.9103, | 20678,   | 268946, | 2630.5571, | 20716,   | 271452, | 2628.2039, |
| 6.579743 |         |            | 6.573862 |         |            | 6.567981 |         |            |
| 20641,   | 267138, | 2632.8484, | 20679,   | 268270, | 2630.4952, | 20717,   | 271498, | 2628.1420, |
| 6.579588 |         |            | 6.573707 |         |            | 6.567826 |         |            |
| 20642,   | 266854, | 2632.7865, | 20680,   | 267968, | 2630.4333, | 20718,   | 271492, | 2628.0800, |
| 6.579433 |         |            | 6.573552 |         |            | 6.567672 |         |            |

|          |         |            |          |         |            |          |         |            |
|----------|---------|------------|----------|---------|------------|----------|---------|------------|
| 20719,   | 271514, | 2628.0181, | 20757,   | 271524, | 2625.6649, | 20795,   | 271128, | 2623.3117, |
| 6.567517 |         |            | 6.561636 |         |            | 6.555755 |         |            |
| 20720,   | 271364, | 2627.9562, | 20758,   | 271880, | 2625.6030, | 20796,   | 270918, | 2623.2497, |
| 6.567362 |         |            | 6.561481 |         |            | 6.555600 |         |            |
| 20721,   | 270860, | 2627.8943, | 20759,   | 271938, | 2625.5410, | 20797,   | 270420, | 2623.1878, |
| 6.567207 |         |            | 6.561326 |         |            | 6.555446 |         |            |
| 20722,   | 270122, | 2627.8323, | 20760,   | 271850, | 2625.4791, | 20798,   | 270198, | 2623.1259, |
| 6.567053 |         |            | 6.561172 |         |            | 6.555291 |         |            |
| 20723,   | 269464, | 2627.7704, | 20761,   | 271934, | 2625.4172, | 20799,   | 270658, | 2623.0640, |
| 6.566898 |         |            | 6.561017 |         |            | 6.555136 |         |            |
| 20724,   | 269116, | 2627.7085, | 20762,   | 272212, | 2625.3553, | 20800,   | 271560, | 2623.0020, |
| 6.566743 |         |            | 6.560862 |         |            | 6.554981 |         |            |
| 20725,   | 269018, | 2627.6465, | 20763,   | 272358, | 2625.2933, | 20801,   | 272222, | 2622.9401, |
| 6.566588 |         |            | 6.560707 |         |            | 6.554827 |         |            |
| 20726,   | 268940, | 2627.5846, | 20764,   | 272024, | 2625.2314, | 20802,   | 272168, | 2622.8782, |
| 6.566433 |         |            | 6.560553 |         |            | 6.554672 |         |            |
| 20727,   | 268746, | 2627.5227, | 20765,   | 271230, | 2625.1695, | 20803,   | 271552, | 2622.8162, |
| 6.566279 |         |            | 6.560398 |         |            | 6.554517 |         |            |
| 20728,   | 268474, | 2627.4608, | 20766,   | 270284, | 2625.1075, | 20804,   | 270914, | 2622.7543, |
| 6.566124 |         |            | 6.560243 |         |            | 6.554362 |         |            |
| 20729,   | 268226, | 2627.3988, | 20767,   | 269500, | 2625.0456, | 20805,   | 270624, | 2622.6924, |
| 6.565969 |         |            | 6.560088 |         |            | 6.554208 |         |            |
| 20730,   | 268022, | 2627.3369, | 20768,   | 268966, | 2624.9837, | 20806,   | 270584, | 2622.6305, |
| 6.565814 |         |            | 6.559934 |         |            | 6.554053 |         |            |
| 20731,   | 267820, | 2627.2750, | 20769,   | 268680, | 2624.9218, | 20807,   | 270494, | 2622.5685, |
| 6.565660 |         |            | 6.559779 |         |            | 6.553898 |         |            |
| 20732,   | 267674, | 2627.2131, | 20770,   | 268742, | 2624.8598, | 20808,   | 270282, | 2622.5066, |
| 6.565505 |         |            | 6.559624 |         |            | 6.553743 |         |            |
| 20733,   | 267708, | 2627.1511, | 20771,   | 269332, | 2624.7979, | 20809,   | 270150, | 2622.4447, |
| 6.565350 |         |            | 6.559469 |         |            | 6.553589 |         |            |
| 20734,   | 267992, | 2627.0892, | 20772,   | 270392, | 2624.7360, | 20810,   | 270256, | 2622.3828, |
| 6.565195 |         |            | 6.559315 |         |            | 6.553434 |         |            |
| 20735,   | 268428, | 2627.0273, | 20773,   | 271498, | 2624.6741, | 20811,   | 270444, | 2622.3208, |
| 6.565041 |         |            | 6.559160 |         |            | 6.553279 |         |            |
| 20736,   | 268826, | 2626.9654, | 20774,   | 272106, | 2624.6121, | 20812,   | 270424, | 2622.2589, |
| 6.564886 |         |            | 6.559005 |         |            | 6.553124 |         |            |
| 20737,   | 269110, | 2626.9034, | 20775,   | 271976, | 2624.5502, | 20813,   | 270160, | 2622.1970, |
| 6.564731 |         |            | 6.558850 |         |            | 6.552970 |         |            |
| 20738,   | 269374, | 2626.8415, | 20776,   | 271382, | 2624.4883, | 20814,   | 269986, | 2622.1351, |
| 6.564576 |         |            | 6.558696 |         |            | 6.552815 |         |            |
| 20739,   | 269704, | 2626.7796, | 20777,   | 270848, | 2624.4263, | 20815,   | 270244, | 2622.0731, |
| 6.564422 |         |            | 6.558541 |         |            | 6.552660 |         |            |
| 20740,   | 270014, | 2626.7176, | 20778,   | 270700, | 2624.3644, | 20816,   | 270854, | 2622.0112, |
| 6.564267 |         |            | 6.558386 |         |            | 6.552505 |         |            |
| 20741,   | 270132, | 2626.6557, | 20779,   | 270894, | 2624.3025, | 20817,   | 271350, | 2621.9493, |
| 6.564112 |         |            | 6.558231 |         |            | 6.552351 |         |            |
| 20742,   | 270054, | 2626.5938, | 20780,   | 271238, | 2624.2406, | 20818,   | 271330, | 2621.8873, |
| 6.563957 |         |            | 6.558077 |         |            | 6.552196 |         |            |
| 20743,   | 270044, | 2626.5319, | 20781,   | 271616, | 2624.1786, | 20819,   | 270890, | 2621.8254, |
| 6.563803 |         |            | 6.557922 |         |            | 6.552041 |         |            |
| 20744,   | 270416, | 2626.4699, | 20782,   | 272004, | 2624.1167, | 20820,   | 270518, | 2621.7635, |
| 6.563648 |         |            | 6.557767 |         |            | 6.551886 |         |            |
| 20745,   | 271148, | 2626.4080, | 20783,   | 272290, | 2624.0548, | 20821,   | 270566, | 2621.7016, |
| 6.563493 |         |            | 6.557612 |         |            | 6.551731 |         |            |
| 20746,   | 271864, | 2626.3461, | 20784,   | 272264, | 2623.9929, | 20822,   | 270964, | 2621.6396, |
| 6.563338 |         |            | 6.557458 |         |            | 6.551577 |         |            |
| 20747,   | 272184, | 2626.2842, | 20785,   | 271838, | 2623.9309, | 20823,   | 271384, | 2621.5777, |
| 6.563184 |         |            | 6.557303 |         |            | 6.551422 |         |            |
| 20748,   | 272142, | 2626.2222, | 20786,   | 271272, | 2623.8690, | 20824,   | 271674, | 2621.5158, |
| 6.563029 |         |            | 6.557148 |         |            | 6.551267 |         |            |
| 20749,   | 272164, | 2626.1603, | 20787,   | 271002, | 2623.8071, | 20825,   | 271988, | 2621.4539, |
| 6.562874 |         |            | 6.556993 |         |            | 6.551112 |         |            |
| 20750,   | 272570, | 2626.0984, | 20788,   | 271218, | 2623.7452, | 20826,   | 272530, | 2621.3919, |
| 6.562719 |         |            | 6.556838 |         |            | 6.550958 |         |            |
| 20751,   | 273160, | 2626.0364, | 20789,   | 271626, | 2623.6832, | 20827,   | 273194, | 2621.3300, |
| 6.562565 |         |            | 6.556684 |         |            | 6.550803 |         |            |
| 20752,   | 273388, | 2625.9745, | 20790,   | 271740, | 2623.6213, | 20828,   | 273626, | 2621.2681, |
| 6.562410 |         |            | 6.556529 |         |            | 6.550648 |         |            |
| 20753,   | 272902, | 2625.9126, | 20791,   | 271378, | 2623.5594, | 20829,   | 273596, | 2621.2061, |
| 6.562255 |         |            | 6.556374 |         |            | 6.550493 |         |            |
| 20754,   | 271970, | 2625.8507, | 20792,   | 270878, | 2623.4974, | 20830,   | 273264, | 2621.1442, |
| 6.562100 |         |            | 6.556219 |         |            | 6.550339 |         |            |
| 20755,   | 271242, | 2625.7887, | 20793,   | 270706, | 2623.4355, | 20831,   | 273010, | 2621.0823, |
| 6.561946 |         |            | 6.556065 |         |            | 6.550184 |         |            |
| 20756,   | 271148, | 2625.7268, | 20794,   | 270928, | 2623.3736, | 20832,   | 272990, | 2621.0204, |
| 6.561791 |         |            | 6.555910 |         |            | 6.550029 |         |            |

|          |         |            |          |         |            |          |         |            |
|----------|---------|------------|----------|---------|------------|----------|---------|------------|
| 20833,   | 273026, | 2620.9584, | 20871,   | 276718, | 2618.6052, | 20909,   | 272896, | 2616.2520, |
| 6.549874 |         |            | 6.543994 |         |            | 6.538113 |         |            |
| 20834,   | 272854, | 2620.8965, | 20872,   | 276102, | 2618.5433, | 20910,   | 272580, | 2616.1901, |
| 6.549720 |         |            | 6.543839 |         |            | 6.537958 |         |            |
| 20835,   | 272488, | 2620.8346, | 20873,   | 275074, | 2618.4814, | 20911,   | 272194, | 2616.1281, |
| 6.549565 |         |            | 6.543684 |         |            | 6.537803 |         |            |
| 20836,   | 272212, | 2620.7727, | 20874,   | 274318, | 2618.4194, | 20912,   | 272012, | 2616.0662, |
| 6.549410 |         |            | 6.543529 |         |            | 6.537649 |         |            |
| 20837,   | 272246, | 2620.7107, | 20875,   | 274248, | 2618.3575, | 20913,   | 272232, | 2616.0043, |
| 6.549255 |         |            | 6.543375 |         |            | 6.537494 |         |            |
| 20838,   | 272462, | 2620.6488, | 20876,   | 274602, | 2618.2956, | 20914,   | 272682, | 2615.9424, |
| 6.549101 |         |            | 6.543220 |         |            | 6.537339 |         |            |
| 20839,   | 272582, | 2620.5869, | 20877,   | 274820, | 2618.2337, | 20915,   | 272968, | 2615.8804, |
| 6.548946 |         |            | 6.543065 |         |            | 6.537184 |         |            |
| 20840,   | 272520, | 2620.5250, | 20878,   | 274672, | 2618.1717, | 20916,   | 272894, | 2615.8185, |
| 6.548791 |         |            | 6.542910 |         |            | 6.537030 |         |            |
| 20841,   | 272536, | 2620.4630, | 20879,   | 274470, | 2618.1098, | 20917,   | 272630, | 2615.7566, |
| 6.548636 |         |            | 6.542756 |         |            | 6.536875 |         |            |
| 20842,   | 272886, | 2620.4011, | 20880,   | 274634, | 2618.0479, | 20918,   | 272450, | 2615.6947, |
| 6.548482 |         |            | 6.542601 |         |            | 6.536720 |         |            |
| 20843,   | 273484, | 2620.3392, | 20881,   | 275136, | 2617.9860, | 20919,   | 272342, | 2615.6327, |
| 6.548327 |         |            | 6.542446 |         |            | 6.536565 |         |            |
| 20844,   | 273936, | 2620.2772, | 20882,   | 275466, | 2617.9240, | 20920,   | 272058, | 2615.5708, |
| 6.548172 |         |            | 6.542291 |         |            | 6.536410 |         |            |
| 20845,   | 273962, | 2620.2153, | 20883,   | 275224, | 2617.8621, | 20921,   | 271488, | 2615.5089, |
| 6.548017 |         |            | 6.542137 |         |            | 6.536256 |         |            |
| 20846,   | 273706, | 2620.1534, | 20884,   | 274568, | 2617.8002, | 20922,   | 270960, | 2615.4469, |
| 6.547863 |         |            | 6.541982 |         |            | 6.536101 |         |            |
| 20847,   | 273572, | 2620.0915, | 20885,   | 274084, | 2617.7382, | 20923,   | 271006, | 2615.3850, |
| 6.547708 |         |            | 6.541827 |         |            | 6.535946 |         |            |
| 20848,   | 273734, | 2620.0295, | 20886,   | 274156, | 2617.6763, | 20924,   | 271804, | 2615.3231, |
| 6.547553 |         |            | 6.541672 |         |            | 6.535791 |         |            |
| 20849,   | 273938, | 2619.9676, | 20887,   | 274590, | 2617.6144, | 20925,   | 272944, | 2615.2612, |
| 6.547398 |         |            | 6.541517 |         |            | 6.535637 |         |            |
| 20850,   | 273820, | 2619.9057, | 20888,   | 274878, | 2617.5525, | 20926,   | 273774, | 2615.1992, |
| 6.547244 |         |            | 6.541363 |         |            | 6.535482 |         |            |
| 20851,   | 273394, | 2619.8438, | 20889,   | 274776, | 2617.4905, | 20927,   | 273980, | 2615.1373, |
| 6.547089 |         |            | 6.541208 |         |            | 6.535327 |         |            |
| 20852,   | 273098, | 2619.7818, | 20890,   | 274542, | 2617.4286, | 20928,   | 273760, | 2615.0754, |
| 6.546934 |         |            | 6.541053 |         |            | 6.535172 |         |            |
| 20853,   | 273330, | 2619.7199, | 20891,   | 274598, | 2617.3667, | 20929,   | 273490, | 2615.0135, |
| 6.546779 |         |            | 6.540898 |         |            | 6.535018 |         |            |
| 20854,   | 273952, | 2619.6580, | 20892,   | 275036, | 2617.3048, | 20930,   | 273262, | 2614.9515, |
| 6.546624 |         |            | 6.540744 |         |            | 6.534863 |         |            |
| 20855,   | 274378, | 2619.5961, | 20893,   | 275560, | 2617.2428, | 20931,   | 272882, | 2614.8896, |
| 6.546470 |         |            | 6.540589 |         |            | 6.534708 |         |            |
| 20856,   | 274122, | 2619.5341, | 20894,   | 275864, | 2617.1809, | 20932,   | 272268, | 2614.8277, |
| 6.546315 |         |            | 6.540434 |         |            | 6.534553 |         |            |
| 20857,   | 273290, | 2619.4722, | 20895,   | 275944, | 2617.1190, | 20933,   | 271720, | 2614.7658, |
| 6.546160 |         |            | 6.540279 |         |            | 6.534399 |         |            |
| 20858,   | 272464, | 2619.4103, | 20896,   | 275972, | 2617.0570, | 20934,   | 271686, | 2614.7038, |
| 6.546005 |         |            | 6.540125 |         |            | 6.534244 |         |            |
| 20859,   | 272170, | 2619.3483, | 20897,   | 275920, | 2616.9951, | 20935,   | 272292, | 2614.6419, |
| 6.545851 |         |            | 6.539970 |         |            | 6.534089 |         |            |
| 20860,   | 272494, | 2619.2864, | 20898,   | 275496, | 2616.9332, | 20936,   | 273138, | 2614.5800, |
| 6.545696 |         |            | 6.539815 |         |            | 6.533934 |         |            |
| 20861,   | 273186, | 2619.2245, | 20899,   | 274544, | 2616.8713, | 20937,   | 273684, | 2614.5180, |
| 6.545541 |         |            | 6.539660 |         |            | 6.533780 |         |            |
| 20862,   | 274002, | 2619.1626, | 20900,   | 273396, | 2616.8093, | 20938,   | 273752, | 2614.4561, |
| 6.545386 |         |            | 6.539506 |         |            | 6.533625 |         |            |
| 20863,   | 274840, | 2619.1006, | 20901,   | 272762, | 2616.7474, | 20939,   | 273614, | 2614.3942, |
| 6.545232 |         |            | 6.539351 |         |            | 6.533470 |         |            |
| 20864,   | 275610, | 2619.0387, | 20902,   | 273074, | 2616.6855, | 20940,   | 273606, | 2614.3323, |
| 6.545077 |         |            | 6.539196 |         |            | 6.533315 |         |            |
| 20865,   | 276098, | 2618.9768, | 20903,   | 274032, | 2616.6236, | 20941,   | 273702, | 2614.2703, |
| 6.544922 |         |            | 6.539041 |         |            | 6.533161 |         |            |
| 20866,   | 276140, | 2618.9149, | 20904,   | 274844, | 2616.5616, | 20942,   | 273580, | 2614.2084, |
| 6.544767 |         |            | 6.538887 |         |            | 6.533006 |         |            |
| 20867,   | 275890, | 2618.8529, | 20905,   | 274910, | 2616.4997, | 20943,   | 273068, | 2614.1465, |
| 6.544613 |         |            | 6.538732 |         |            | 6.532851 |         |            |
| 20868,   | 275784, | 2618.7910, | 20906,   | 274322, | 2616.4378, | 20944,   | 272426, | 2614.0846, |
| 6.544458 |         |            | 6.538577 |         |            | 6.532696 |         |            |
| 20869,   | 276100, | 2618.7291, | 20907,   | 273608, | 2616.3759, | 20945,   | 272136, | 2614.0226, |
| 6.544303 |         |            | 6.538422 |         |            | 6.532542 |         |            |
| 20870,   | 276608, | 2618.6671, | 20908,   | 273154, | 2616.3139, | 20946,   | 272442, | 2613.9607, |
| 6.544148 |         |            | 6.538268 |         |            | 6.532387 |         |            |

|          |         |            |          |         |            |          |         |            |
|----------|---------|------------|----------|---------|------------|----------|---------|------------|
| 20947,   | 273112, | 2613.8988, | 20985,   | 274224, | 2611.5456, | 21023,   | 275434, | 2609.1923, |
| 6.532232 |         |            | 6.526351 |         |            | 6.520470 |         |            |
| 20948,   | 273700, | 2613.8368, | 20986,   | 274234, | 2611.4836, | 21024,   | 275426, | 2609.1304, |
| 6.532077 |         |            | 6.526196 |         |            | 6.520316 |         |            |
| 20949,   | 273952, | 2613.7749, | 20987,   | 274094, | 2611.4217, | 21025,   | 275248, | 2609.0685, |
| 6.531923 |         |            | 6.526042 |         |            | 6.520161 |         |            |
| 20950,   | 273948, | 2613.7130, | 20988,   | 274098, | 2611.3598, | 21026,   | 275256, | 2609.0065, |
| 6.531768 |         |            | 6.525887 |         |            | 6.520006 |         |            |
| 20951,   | 273886, | 2613.6511, | 20989,   | 274342, | 2611.2978, | 21027,   | 275588, | 2608.9446, |
| 6.531613 |         |            | 6.525732 |         |            | 6.519851 |         |            |
| 20952,   | 273834, | 2613.5891, | 20990,   | 274662, | 2611.2359, | 21028,   | 275930, | 2608.8827, |
| 6.531458 |         |            | 6.525577 |         |            | 6.519697 |         |            |
| 20953,   | 273756, | 2613.5272, | 20991,   | 274886, | 2611.1740, | 21029,   | 275936, | 2608.8208, |
| 6.531303 |         |            | 6.525423 |         |            | 6.519542 |         |            |
| 20954,   | 273702, | 2613.4653, | 20992,   | 275100, | 2611.1121, | 21030,   | 275638, | 2608.7588, |
| 6.531149 |         |            | 6.525268 |         |            | 6.519387 |         |            |
| 20955,   | 273810, | 2613.4034, | 20993,   | 275534, | 2611.0501, | 21031,   | 275504, | 2608.6969, |
| 6.530994 |         |            | 6.525113 |         |            | 6.519232 |         |            |
| 20956,   | 274136, | 2613.3414, | 20994,   | 276226, | 2610.9882, | 21032,   | 275908, | 2608.6350, |
| 6.530839 |         |            | 6.524958 |         |            | 6.519078 |         |            |
| 20957,   | 274488, | 2613.2795, | 20995,   | 276864, | 2610.9263, | 21033,   | 276730, | 2608.5731, |
| 6.530684 |         |            | 6.524804 |         |            | 6.518923 |         |            |
| 20958,   | 274560, | 2613.2176, | 20996,   | 277054, | 2610.8644, | 21034,   | 277462, | 2608.5111, |
| 6.530530 |         |            | 6.524649 |         |            | 6.518768 |         |            |
| 20959,   | 274296, | 2613.1557, | 20997,   | 276748, | 2610.8024, | 21035,   | 277698, | 2608.4492, |
| 6.530375 |         |            | 6.524494 |         |            | 6.518613 |         |            |
| 20960,   | 273996, | 2613.0937, | 20998,   | 276318, | 2610.7405, | 21036,   | 277490, | 2608.3873, |
| 6.530220 |         |            | 6.524339 |         |            | 6.518459 |         |            |
| 20961,   | 274062, | 2613.0318, | 20999,   | 276184, | 2610.6786, | 21037,   | 277160, | 2608.3254, |
| 6.530065 |         |            | 6.524185 |         |            | 6.518304 |         |            |
| 20962,   | 274562, | 2612.9699, | 21000,   | 276380, | 2610.6166, | 21038,   | 276928, | 2608.2634, |
| 6.529911 |         |            | 6.524030 |         |            | 6.518149 |         |            |
| 20963,   | 275132, | 2612.9079, | 21001,   | 276590, | 2610.5547, | 21039,   | 276718, | 2608.2015, |
| 6.529756 |         |            | 6.523875 |         |            | 6.517994 |         |            |
| 20964,   | 275320, | 2612.8460, | 21002,   | 276550, | 2610.4928, | 21040,   | 276392, | 2608.1396, |
| 6.529601 |         |            | 6.523720 |         |            | 6.517840 |         |            |
| 20965,   | 275020, | 2612.7841, | 21003,   | 276364, | 2610.4309, | 21041,   | 276004, | 2608.0776, |
| 6.529446 |         |            | 6.523566 |         |            | 6.517685 |         |            |
| 20966,   | 274544, | 2612.7222, | 21004,   | 276368, | 2610.3689, | 21042,   | 275786, | 2608.0157, |
| 6.529292 |         |            | 6.523411 |         |            | 6.517530 |         |            |
| 20967,   | 274284, | 2612.6602, | 21005,   | 276750, | 2610.3070, | 21043,   | 275870, | 2607.9538, |
| 6.529137 |         |            | 6.523256 |         |            | 6.517375 |         |            |
| 20968,   | 274340, | 2612.5983, | 21006,   | 277332, | 2610.2451, | 21044,   | 276162, | 2607.8919, |
| 6.528982 |         |            | 6.523101 |         |            | 6.517221 |         |            |
| 20969,   | 274532, | 2612.5364, | 21007,   | 277840, | 2610.1832, | 21045,   | 276466, | 2607.8299, |
| 6.528827 |         |            | 6.522947 |         |            | 6.517066 |         |            |
| 20970,   | 274674, | 2612.4745, | 21008,   | 278252, | 2610.1212, | 21046,   | 276712, | 2607.7680, |
| 6.528673 |         |            | 6.522792 |         |            | 6.516911 |         |            |
| 20971,   | 274756, | 2612.4125, | 21009,   | 278754, | 2610.0593, | 21047,   | 276928, | 2607.7061, |
| 6.528518 |         |            | 6.522637 |         |            | 6.516756 |         |            |
| 20972,   | 274830, | 2612.3506, | 21010,   | 279420, | 2609.9974, | 21048,   | 277028, | 2607.6442, |
| 6.528363 |         |            | 6.522482 |         |            | 6.516602 |         |            |
| 20973,   | 274814, | 2612.2887, | 21011,   | 279934, | 2609.9355, | 21049,   | 276772, | 2607.5822, |
| 6.528208 |         |            | 6.522328 |         |            | 6.516447 |         |            |
| 20974,   | 274524, | 2612.2267, | 21012,   | 279870, | 2609.8735, | 21050,   | 276040, | 2607.5203, |
| 6.528054 |         |            | 6.522173 |         |            | 6.516292 |         |            |
| 20975,   | 273914, | 2612.1648, | 21013,   | 279186, | 2609.8116, | 21051,   | 275148, | 2607.4584, |
| 6.527899 |         |            | 6.522018 |         |            | 6.516137 |         |            |
| 20976,   | 273242, | 2612.1029, | 21014,   | 278378, | 2609.7497, | 21052,   | 274754, | 2607.3964, |
| 6.527744 |         |            | 6.521863 |         |            | 6.515982 |         |            |
| 20977,   | 272890, | 2612.0410, | 21015,   | 278018, | 2609.6877, | 21053,   | 275284, | 2607.3345, |
| 6.527589 |         |            | 6.521709 |         |            | 6.515828 |         |            |
| 20978,   | 272986, | 2611.9790, | 21016,   | 278162, | 2609.6258, | 21054,   | 276520, | 2607.2726, |
| 6.527435 |         |            | 6.521554 |         |            | 6.515673 |         |            |
| 20979,   | 273282, | 2611.9171, | 21017,   | 278258, | 2609.5639, | 21055,   | 277750, | 2607.2107, |
| 6.527280 |         |            | 6.521399 |         |            | 6.515518 |         |            |
| 20980,   | 273434, | 2611.8552, | 21018,   | 277740, | 2609.5020, | 21056,   | 278442, | 2607.1487, |
| 6.527125 |         |            | 6.521244 |         |            | 6.515363 |         |            |
| 20981,   | 273362, | 2611.7933, | 21019,   | 276622, | 2609.4400, | 21057,   | 278708, | 2607.0868, |
| 6.526970 |         |            | 6.521089 |         |            | 6.515209 |         |            |
| 20982,   | 273312, | 2611.7313, | 21020,   | 275526, | 2609.3781, | 21058,   | 279054, | 2607.0249, |
| 6.526816 |         |            | 6.520935 |         |            | 6.515054 |         |            |
| 20983,   | 273522, | 2611.6694, | 21021,   | 275040, | 2609.3162, | 21059,   | 279736, | 2606.9630, |
| 6.526661 |         |            | 6.520780 |         |            | 6.514899 |         |            |
| 20984,   | 273926, | 2611.6075, | 21022,   | 275172, | 2609.2543, | 21060,   | 280418, | 2606.9010, |
| 6.526506 |         |            | 6.520625 |         |            | 6.514744 |         |            |

|          |         |            |          |         |            |          |         |            |
|----------|---------|------------|----------|---------|------------|----------|---------|------------|
| 21061,   | 280548, | 2606.8391, | 21099,   | 279352, | 2604.4859, | 21137,   | 281724, | 2602.1327, |
| 6.514590 |         |            | 6.508709 |         |            | 6.502828 |         |            |
| 21062,   | 280004, | 2606.7772, | 21100,   | 278996, | 2604.4240, | 21138,   | 280488, | 2602.0707, |
| 6.514435 |         |            | 6.508554 |         |            | 6.502673 |         |            |
| 21063,   | 279268, | 2606.7153, | 21101,   | 278916, | 2604.3620, | 21139,   | 279384, | 2602.0088, |
| 6.514280 |         |            | 6.508399 |         |            | 6.502519 |         |            |
| 21064,   | 278906, | 2606.6533, | 21102,   | 279454, | 2604.3001, | 21140,   | 279070, | 2601.9469, |
| 6.514125 |         |            | 6.508245 |         |            | 6.502364 |         |            |
| 21065,   | 278980, | 2606.5914, | 21103,   | 280512, | 2604.2382, | 21141,   | 279562, | 2601.8850, |
| 6.513971 |         |            | 6.508090 |         |            | 6.502209 |         |            |
| 21066,   | 279060, | 2606.5295, | 21104,   | 281512, | 2604.1763, | 21142,   | 280326, | 2601.8230, |
| 6.513816 |         |            | 6.507935 |         |            | 6.502054 |         |            |
| 21067,   | 278818, | 2606.4675, | 21105,   | 281904, | 2604.1143, | 21143,   | 280884, | 2601.7611, |
| 6.513661 |         |            | 6.507780 |         |            | 6.501900 |         |            |
| 21068,   | 278458, | 2606.4056, | 21106,   | 281628, | 2604.0524, | 21144,   | 281234, | 2601.6992, |
| 6.513506 |         |            | 6.507626 |         |            | 6.501745 |         |            |
| 21069,   | 278506, | 2606.3437, | 21107,   | 281104, | 2603.9905, | 21145,   | 281694, | 2601.6372, |
| 6.513352 |         |            | 6.507471 |         |            | 6.501590 |         |            |
| 21070,   | 279142, | 2606.2818, | 21108,   | 280718, | 2603.9285, | 21146,   | 282344, | 2601.5753, |
| 6.513197 |         |            | 6.507316 |         |            | 6.501435 |         |            |
| 21071,   | 279902, | 2606.2198, | 21109,   | 280414, | 2603.8666, | 21147,   | 282844, | 2601.5134, |
| 6.513042 |         |            | 6.507161 |         |            | 6.501280 |         |            |
| 21072,   | 280124, | 2606.1579, | 21110,   | 279858, | 2603.8047, | 21148,   | 282768, | 2601.4515, |
| 6.512887 |         |            | 6.507007 |         |            | 6.501126 |         |            |
| 21073,   | 279656, | 2606.0960, | 21111,   | 278846, | 2603.7428, | 21149,   | 282150, | 2601.3895, |
| 6.512733 |         |            | 6.506852 |         |            | 6.500971 |         |            |
| 21074,   | 279046, | 2606.0341, | 21112,   | 277606, | 2603.6808, | 21150,   | 281474, | 2601.3276, |
| 6.512578 |         |            | 6.506697 |         |            | 6.500816 |         |            |
| 21075,   | 278922, | 2605.9721, | 21113,   | 276554, | 2603.6189, | 21151,   | 281212, | 2601.2657, |
| 6.512423 |         |            | 6.506542 |         |            | 6.500661 |         |            |
| 21076,   | 279330, | 2605.9102, | 21114,   | 275928, | 2603.5570, | 21152,   | 281318, | 2601.2038, |
| 6.512268 |         |            | 6.506387 |         |            | 6.500507 |         |            |
| 21077,   | 279682, | 2605.8483, | 21115,   | 275644, | 2603.4951, | 21153,   | 281338, | 2601.1418, |
| 6.512114 |         |            | 6.506233 |         |            | 6.500352 |         |            |
| 21078,   | 279410, | 2605.7864, | 21116,   | 275564, | 2603.4331, | 21154,   | 280930, | 2601.0799, |
| 6.511959 |         |            | 6.506078 |         |            | 6.500197 |         |            |
| 21079,   | 278558, | 2605.7244, | 21117,   | 275716, | 2603.3712, | 21155,   | 280256, | 2601.0180, |
| 6.511804 |         |            | 6.505923 |         |            | 6.500042 |         |            |
| 21080,   | 277652, | 2605.6625, | 21118,   | 276204, | 2603.3093, | 21156,   | 279768, | 2600.9561, |
| 6.511649 |         |            | 6.505768 |         |            | 6.499888 |         |            |
| 21081,   | 277110, | 2605.6006, | 21119,   | 276962, | 2603.2473, | 21157,   | 279686, | 2600.8941, |
| 6.511494 |         |            | 6.505614 |         |            | 6.499733 |         |            |
| 21082,   | 276818, | 2605.5386, | 21120,   | 277656, | 2603.1854, | 21158,   | 279798, | 2600.8322, |
| 6.511340 |         |            | 6.505459 |         |            | 6.499578 |         |            |
| 21083,   | 276438, | 2605.4767, | 21121,   | 277984, | 2603.1235, | 21159,   | 279746, | 2600.7703, |
| 6.511185 |         |            | 6.505304 |         |            | 6.499423 |         |            |
| 21084,   | 275956, | 2605.4148, | 21122,   | 277988, | 2603.0616, | 21160,   | 279446, | 2600.7083, |
| 6.511030 |         |            | 6.505149 |         |            | 6.499269 |         |            |
| 21085,   | 275828, | 2605.3529, | 21123,   | 278034, | 2602.9996, | 21161,   | 279130, | 2600.6464, |
| 6.510875 |         |            | 6.504995 |         |            | 6.499114 |         |            |
| 21086,   | 276484, | 2605.2909, | 21124,   | 278448, | 2602.9377, | 21162,   | 279008, | 2600.5845, |
| 6.510721 |         |            | 6.504840 |         |            | 6.498959 |         |            |
| 21087,   | 277770, | 2605.2290, | 21125,   | 279196, | 2602.8758, | 21163,   | 278998, | 2600.5226, |
| 6.510566 |         |            | 6.504685 |         |            | 6.498804 |         |            |
| 21088,   | 279010, | 2605.1671, | 21126,   | 279984, | 2602.8139, | 21164,   | 278866, | 2600.4606, |
| 6.510411 |         |            | 6.504530 |         |            | 6.498650 |         |            |
| 21089,   | 279608, | 2605.1052, | 21127,   | 280576, | 2602.7519, | 21165,   | 278638, | 2600.3987, |
| 6.510256 |         |            | 6.504376 |         |            | 6.498495 |         |            |
| 21090,   | 279592, | 2605.0432, | 21128,   | 280984, | 2602.6900, | 21166,   | 278690, | 2600.3368, |
| 6.510102 |         |            | 6.504221 |         |            | 6.498340 |         |            |
| 21091,   | 279466, | 2604.9813, | 21129,   | 281314, | 2602.6281, | 21167,   | 279380, | 2600.2749, |
| 6.509947 |         |            | 6.504066 |         |            | 6.498185 |         |            |
| 21092,   | 279642, | 2604.9194, | 21130,   | 281544, | 2602.5662, | 21168,   | 280584, | 2600.2129, |
| 6.509792 |         |            | 6.503911 |         |            | 6.498031 |         |            |
| 21093,   | 280044, | 2604.8574, | 21131,   | 281556, | 2602.5042, | 21169,   | 281700, | 2600.1510, |
| 6.509637 |         |            | 6.503757 |         |            | 6.497876 |         |            |
| 21094,   | 280306, | 2604.7955, | 21132,   | 281390, | 2602.4423, | 21170,   | 282152, | 2600.0891, |
| 6.509483 |         |            | 6.503602 |         |            | 6.497721 |         |            |
| 21095,   | 280234, | 2604.7336, | 21133,   | 281342, | 2602.3804, | 21171,   | 281876, | 2600.0271, |
| 6.509328 |         |            | 6.503447 |         |            | 6.497566 |         |            |
| 21096,   | 279988, | 2604.6717, | 21134,   | 281664, | 2602.3184, | 21172,   | 281338, | 2599.9652, |
| 6.509173 |         |            | 6.503292 |         |            | 6.497412 |         |            |
| 21097,   | 279786, | 2604.6097, | 21135,   | 282186, | 2602.2565, | 21173,   | 281032, | 2599.9033, |
| 6.509018 |         |            | 6.503138 |         |            | 6.497257 |         |            |
| 21098,   | 279628, | 2604.5478, | 21136,   | 282356, | 2602.1946, | 21174,   | 281082, | 2599.8414, |
| 6.508864 |         |            | 6.502983 |         |            | 6.497102 |         |            |

|          |         |            |          |         |            |          |         |            |
|----------|---------|------------|----------|---------|------------|----------|---------|------------|
| 21175,   | 281256, | 2599.7794, | 21213,   | 281776, | 2597.4262, | 21251,   | 282694, | 2595.0730, |
| 6.496947 |         |            | 6.491066 |         |            | 6.485186 |         |            |
| 21176,   | 281316, | 2599.7175, | 21214,   | 281692, | 2597.3643, | 21252,   | 281980, | 2595.0111, |
| 6.496793 |         |            | 6.490912 |         |            | 6.485031 |         |            |
| 21177,   | 281216, | 2599.6556, | 21215,   | 282044, | 2597.3024, | 21253,   | 281294, | 2594.9491, |
| 6.496638 |         |            | 6.490757 |         |            | 6.484876 |         |            |
| 21178,   | 281036, | 2599.5937, | 21216,   | 282880, | 2597.2404, | 21254,   | 280954, | 2594.8872, |
| 6.496483 |         |            | 6.490602 |         |            | 6.484721 |         |            |
| 21179,   | 280794, | 2599.5317, | 21217,   | 283798, | 2597.1785, | 21255,   | 280910, | 2594.8253, |
| 6.496328 |         |            | 6.490447 |         |            | 6.484567 |         |            |
| 21180,   | 280446, | 2599.4698, | 21218,   | 284246, | 2597.1166, | 21256,   | 280886, | 2594.7634, |
| 6.496173 |         |            | 6.490293 |         |            | 6.484412 |         |            |
| 21181,   | 280086, | 2599.4079, | 21219,   | 284072, | 2597.0547, | 21257,   | 280784, | 2594.7014, |
| 6.496019 |         |            | 6.490138 |         |            | 6.484257 |         |            |
| 21182,   | 279928, | 2599.3460, | 21220,   | 283664, | 2596.9927, | 21258,   | 280836, | 2594.6395, |
| 6.495864 |         |            | 6.489983 |         |            | 6.484102 |         |            |
| 21183,   | 280130, | 2599.2840, | 21221,   | 283514, | 2596.9308, | 21259,   | 281292, | 2594.5776, |
| 6.495709 |         |            | 6.489828 |         |            | 6.483948 |         |            |
| 21184,   | 280550, | 2599.2221, | 21222,   | 283658, | 2596.8689, | 21260,   | 282060, | 2594.5157, |
| 6.495554 |         |            | 6.489674 |         |            | 6.483793 |         |            |
| 21185,   | 280860, | 2599.1602, | 21223,   | 283678, | 2596.8069, | 21261,   | 282688, | 2594.4537, |
| 6.495400 |         |            | 6.489519 |         |            | 6.483638 |         |            |
| 21186,   | 280890, | 2599.0982, | 21224,   | 283204, | 2596.7450, | 21262,   | 282818, | 2594.3918, |
| 6.495245 |         |            | 6.489364 |         |            | 6.483483 |         |            |
| 21187,   | 280842, | 2599.0363, | 21225,   | 282428, | 2596.6831, | 21263,   | 282536, | 2594.3299, |
| 6.495090 |         |            | 6.489209 |         |            | 6.483329 |         |            |
| 21188,   | 281018, | 2598.9744, | 21226,   | 281916, | 2596.6212, | 21264,   | 282260, | 2594.2679, |
| 6.494935 |         |            | 6.489055 |         |            | 6.483174 |         |            |
| 21189,   | 281428, | 2598.9125, | 21227,   | 282040, | 2596.5592, | 21265,   | 282268, | 2594.2060, |
| 6.494781 |         |            | 6.488900 |         |            | 6.483019 |         |            |
| 21190,   | 281686, | 2598.8505, | 21228,   | 282568, | 2596.4973, | 21266,   | 282414, | 2594.1441, |
| 6.494626 |         |            | 6.488745 |         |            | 6.482864 |         |            |
| 21191,   | 281430, | 2598.7886, | 21229,   | 282940, | 2596.4354, | 21267,   | 282348, | 2594.0822, |
| 6.494471 |         |            | 6.488590 |         |            | 6.482710 |         |            |
| 21192,   | 280790, | 2598.7267, | 21230,   | 282894, | 2596.3735, | 21268,   | 281912, | 2594.0202, |
| 6.494316 |         |            | 6.488436 |         |            | 6.482555 |         |            |
| 21193,   | 280354, | 2598.6648, | 21231,   | 282712, | 2596.3115, | 21269,   | 281322, | 2593.9583, |
| 6.494162 |         |            | 6.488281 |         |            | 6.482400 |         |            |
| 21194,   | 280584, | 2598.6028, | 21232,   | 282860, | 2596.2496, | 21270,   | 280912, | 2593.8964, |
| 6.494007 |         |            | 6.488126 |         |            | 6.482245 |         |            |
| 21195,   | 281314, | 2598.5409, | 21233,   | 283380, | 2596.1877, | 21271,   | 280794, | 2593.8345, |
| 6.493852 |         |            | 6.487971 |         |            | 6.482091 |         |            |
| 21196,   | 281856, | 2598.4790, | 21234,   | 283824, | 2596.1258, | 21272,   | 280866, | 2593.7725, |
| 6.493697 |         |            | 6.487817 |         |            | 6.481936 |         |            |
| 21197,   | 281680, | 2598.4170, | 21235,   | 283732, | 2596.0638, | 21273,   | 281072, | 2593.7106, |
| 6.493543 |         |            | 6.487662 |         |            | 6.481781 |         |            |
| 21198,   | 280918, | 2598.3551, | 21236,   | 283132, | 2596.0019, | 21274,   | 281516, | 2593.6487, |
| 6.493388 |         |            | 6.487507 |         |            | 6.481626 |         |            |
| 21199,   | 280172, | 2598.2932, | 21237,   | 282532, | 2595.9400, | 21275,   | 282264, | 2593.5868, |
| 6.493233 |         |            | 6.487352 |         |            | 6.481472 |         |            |
| 21200,   | 279874, | 2598.2313, | 21238,   | 282380, | 2595.8780, | 21276,   | 283060, | 2593.5248, |
| 6.493078 |         |            | 6.487198 |         |            | 6.481317 |         |            |
| 21201,   | 279914, | 2598.1693, | 21239,   | 282682, | 2595.8161, | 21277,   | 283462, | 2593.4629, |
| 6.492924 |         |            | 6.487043 |         |            | 6.481162 |         |            |
| 21202,   | 279898, | 2598.1074, | 21240,   | 283076, | 2595.7542, | 21278,   | 283266, | 2593.4010, |
| 6.492769 |         |            | 6.486888 |         |            | 6.481007 |         |            |
| 21203,   | 279718, | 2598.0455, | 21241,   | 283308, | 2595.6923, | 21279,   | 282854, | 2593.3390, |
| 6.492614 |         |            | 6.486733 |         |            | 6.480852 |         |            |
| 21204,   | 279698, | 2597.9836, | 21242,   | 283402, | 2595.6303, | 21280,   | 282912, | 2593.2771, |
| 6.492459 |         |            | 6.486579 |         |            | 6.480698 |         |            |
| 21205,   | 280214, | 2597.9216, | 21243,   | 283524, | 2595.5684, | 21281,   | 283800, | 2593.2152, |
| 6.492305 |         |            | 6.486424 |         |            | 6.480543 |         |            |
| 21206,   | 281202, | 2597.8597, | 21244,   | 283642, | 2595.5065, | 21282,   | 285154, | 2593.1533, |
| 6.492150 |         |            | 6.486269 |         |            | 6.480388 |         |            |
| 21207,   | 282166, | 2597.7978, | 21245,   | 283576, | 2595.4446, | 21283,   | 286198, | 2593.0913, |
| 6.491995 |         |            | 6.486114 |         |            | 6.480233 |         |            |
| 21208,   | 282648, | 2597.7359, | 21246,   | 283252, | 2595.3826, | 21284,   | 286408, | 2593.0294, |
| 6.491840 |         |            | 6.485959 |         |            | 6.480079 |         |            |
| 21209,   | 282614, | 2597.6739, | 21247,   | 282896, | 2595.3207, | 21285,   | 285904, | 2592.9675, |
| 6.491686 |         |            | 6.485805 |         |            | 6.479924 |         |            |
| 21210,   | 282374, | 2597.6120, | 21248,   | 282798, | 2595.2588, | 21286,   | 285188, | 2592.9056, |
| 6.491531 |         |            | 6.485650 |         |            | 6.479769 |         |            |
| 21211,   | 282170, | 2597.5501, | 21249,   | 282960, | 2595.1968, | 21287,   | 284602, | 2592.8436, |
| 6.491376 |         |            | 6.485495 |         |            | 6.479614 |         |            |
| 21212,   | 281990, | 2597.4881, | 21250,   | 283038, | 2595.1349, | 21288,   | 284140, | 2592.7817, |
| 6.491221 |         |            | 6.485340 |         |            | 6.479460 |         |            |

|          |         |            |          |         |            |          |         |            |
|----------|---------|------------|----------|---------|------------|----------|---------|------------|
| 21289,   | 283728, | 2592.7198, | 21327,   | 284024, | 2590.3666, | 21365,   | 284200, | 2588.0133, |
| 6.479305 |         |            | 6.473424 |         |            | 6.467543 |         |            |
| 21290,   | 283536, | 2592.6578, | 21328,   | 283668, | 2590.3046, | 21366,   | 284216, | 2587.9514, |
| 6.479150 |         |            | 6.473269 |         |            | 6.467389 |         |            |
| 21291,   | 283906, | 2592.5959, | 21329,   | 283388, | 2590.2427, | 21367,   | 284848, | 2587.8895, |
| 6.478995 |         |            | 6.473115 |         |            | 6.467234 |         |            |
| 21292,   | 284906, | 2592.5340, | 21330,   | 283536, | 2590.1808, | 21368,   | 285860, | 2587.8275, |
| 6.478841 |         |            | 6.472960 |         |            | 6.467079 |         |            |
| 21293,   | 286102, | 2592.4721, | 21331,   | 283972, | 2590.1188, | 21369,   | 286618, | 2587.7656, |
| 6.478686 |         |            | 6.472805 |         |            | 6.466924 |         |            |
| 21294,   | 286854, | 2592.4101, | 21332,   | 284304, | 2590.0569, | 21370,   | 286678, | 2587.7037, |
| 6.478531 |         |            | 6.472650 |         |            | 6.466770 |         |            |
| 21295,   | 286822, | 2592.3482, | 21333,   | 284384, | 2589.9950, | 21371,   | 286230, | 2587.6418, |
| 6.478376 |         |            | 6.472496 |         |            | 6.466615 |         |            |
| 21296,   | 286208, | 2592.2863, | 21334,   | 284448, | 2589.9331, | 21372,   | 285896, | 2587.5798, |
| 6.478222 |         |            | 6.472341 |         |            | 6.466460 |         |            |
| 21297,   | 285426, | 2592.2244, | 21335,   | 284808, | 2589.8711, | 21373,   | 286072, | 2587.5179, |
| 6.478067 |         |            | 6.472186 |         |            | 6.466305 |         |            |
| 21298,   | 284696, | 2592.1624, | 21336,   | 285414, | 2589.8092, | 21374,   | 286566, | 2587.4560, |
| 6.477912 |         |            | 6.472031 |         |            | 6.466150 |         |            |
| 21299,   | 283948, | 2592.1005, | 21337,   | 285902, | 2589.7473, | 21375,   | 286864, | 2587.3941, |
| 6.477757 |         |            | 6.471877 |         |            | 6.465996 |         |            |
| 21300,   | 283146, | 2592.0386, | 21338,   | 286032, | 2589.6854, | 21376,   | 286784, | 2587.3321, |
| 6.477603 |         |            | 6.471722 |         |            | 6.465841 |         |            |
| 21301,   | 282544, | 2591.9767, | 21339,   | 285954, | 2589.6234, | 21377,   | 286696, | 2587.2702, |
| 6.477448 |         |            | 6.471567 |         |            | 6.465686 |         |            |
| 21302,   | 282514, | 2591.9147, | 21340,   | 286034, | 2589.5615, | 21378,   | 287084, | 2587.2083, |
| 6.477293 |         |            | 6.471412 |         |            | 6.465531 |         |            |
| 21303,   | 283120, | 2591.8528, | 21341,   | 286380, | 2589.4996, | 21379,   | 287946, | 2587.1464, |
| 6.477138 |         |            | 6.471258 |         |            | 6.465377 |         |            |
| 21304,   | 283974, | 2591.7909, | 21342,   | 286674, | 2589.4376, | 21380,   | 288708, | 2587.0844, |
| 6.476984 |         |            | 6.471103 |         |            | 6.465222 |         |            |
| 21305,   | 284526, | 2591.7289, | 21343,   | 286524, | 2589.3757, | 21381,   | 288804, | 2587.0225, |
| 6.476829 |         |            | 6.470948 |         |            | 6.465067 |         |            |
| 21306,   | 284524, | 2591.6670, | 21344,   | 285894, | 2589.3138, | 21382,   | 288214, | 2586.9606, |
| 6.476674 |         |            | 6.470793 |         |            | 6.464912 |         |            |
| 21307,   | 284154, | 2591.6051, | 21345,   | 285164, | 2589.2519, | 21383,   | 287448, | 2586.8986, |
| 6.476519 |         |            | 6.470638 |         |            | 6.464758 |         |            |
| 21308,   | 283750, | 2591.5432, | 21346,   | 284742, | 2589.1899, | 21384,   | 287018, | 2586.8367, |
| 6.476365 |         |            | 6.470484 |         |            | 6.464603 |         |            |
| 21309,   | 283484, | 2591.4812, | 21347,   | 284636, | 2589.1280, | 21385,   | 286954, | 2586.7748, |
| 6.476210 |         |            | 6.470329 |         |            | 6.464448 |         |            |
| 21310,   | 283356, | 2591.4193, | 21348,   | 284554, | 2589.0661, | 21386,   | 286902, | 2586.7129, |
| 6.476055 |         |            | 6.470174 |         |            | 6.464293 |         |            |
| 21311,   | 283424, | 2591.3574, | 21349,   | 284292, | 2589.0042, | 21387,   | 286636, | 2586.6509, |
| 6.475900 |         |            | 6.470019 |         |            | 6.464139 |         |            |
| 21312,   | 283846, | 2591.2955, | 21350,   | 283990, | 2588.9422, | 21388,   | 286306, | 2586.5890, |
| 6.475745 |         |            | 6.469865 |         |            | 6.463984 |         |            |
| 21313,   | 284658, | 2591.2335, | 21351,   | 283978, | 2588.8803, | 21389,   | 286182, | 2586.5271, |
| 6.475591 |         |            | 6.469710 |         |            | 6.463829 |         |            |
| 21314,   | 285528, | 2591.1716, | 21352,   | 284358, | 2588.8184, | 21390,   | 286280, | 2586.4652, |
| 6.475436 |         |            | 6.469555 |         |            | 6.463674 |         |            |
| 21315,   | 285956, | 2591.1097, | 21353,   | 284918, | 2588.7565, | 21391,   | 286292, | 2586.4032, |
| 6.475281 |         |            | 6.469400 |         |            | 6.463520 |         |            |
| 21316,   | 285706, | 2591.0477, | 21354,   | 285330, | 2588.6945, | 21392,   | 285988, | 2586.3413, |
| 6.475126 |         |            | 6.469246 |         |            | 6.463365 |         |            |
| 21317,   | 285082, | 2590.9858, | 21355,   | 285498, | 2588.6326, | 21393,   | 285532, | 2586.2794, |
| 6.474972 |         |            | 6.469091 |         |            | 6.463210 |         |            |
| 21318,   | 284628, | 2590.9239, | 21356,   | 285540, | 2588.5707, | 21394,   | 285338, | 2586.2174, |
| 6.474817 |         |            | 6.468936 |         |            | 6.463055 |         |            |
| 21319,   | 284570, | 2590.8620, | 21357,   | 285564, | 2588.5087, | 21395,   | 285620, | 2586.1555, |
| 6.474662 |         |            | 6.468781 |         |            | 6.462901 |         |            |
| 21320,   | 284606, | 2590.8000, | 21358,   | 285522, | 2588.4468, | 21396,   | 286130, | 2586.0936, |
| 6.474507 |         |            | 6.468627 |         |            | 6.462746 |         |            |
| 21321,   | 284280, | 2590.7381, | 21359,   | 285328, | 2588.3849, | 21397,   | 286414, | 2586.0317, |
| 6.474353 |         |            | 6.468472 |         |            | 6.462591 |         |            |
| 21322,   | 283566, | 2590.6762, | 21360,   | 285044, | 2588.3230, | 21398,   | 286288, | 2585.9697, |
| 6.474198 |         |            | 6.468317 |         |            | 6.462436 |         |            |
| 21323,   | 282948, | 2590.6143, | 21361,   | 284848, | 2588.2610, | 21399,   | 285962, | 2585.9078, |
| 6.474043 |         |            | 6.468162 |         |            | 6.462282 |         |            |
| 21324,   | 282916, | 2590.5523, | 21362,   | 284816, | 2588.1991, | 21400,   | 285760, | 2585.8459, |
| 6.473888 |         |            | 6.468008 |         |            | 6.462127 |         |            |
| 21325,   | 283438, | 2590.4904, | 21363,   | 284770, | 2588.1372, | 21401,   | 285696, | 2585.7840, |
| 6.473734 |         |            | 6.467853 |         |            | 6.461972 |         |            |
| 21326,   | 283968, | 2590.4285, | 21364,   | 284524, | 2588.0753, | 21402,   | 285482, | 2585.7220, |
| 6.473579 |         |            | 6.467698 |         |            | 6.461817 |         |            |

|          |         |            |          |         |            |          |         |            |
|----------|---------|------------|----------|---------|------------|----------|---------|------------|
| 21403,   | 284852, | 2585.6601, | 21441,   | 287296, | 2583.3069, | 21479,   | 289128, | 2580.9537, |
| 6.461663 |         |            | 6.455782 |         |            | 6.449901 |         |            |
| 21404,   | 283882, | 2585.5982, | 21442,   | 286812, | 2583.2450, | 21480,   | 289336, | 2580.8917, |
| 6.461508 |         |            | 6.455627 |         |            | 6.449746 |         |            |
| 21405,   | 282916, | 2585.5363, | 21443,   | 286968, | 2583.1830, | 21481,   | 289816, | 2580.8298, |
| 6.461353 |         |            | 6.455472 |         |            | 6.449591 |         |            |
| 21406,   | 282254, | 2585.4743, | 21444,   | 287622, | 2583.1211, | 21482,   | 290272, | 2580.7679, |
| 6.461198 |         |            | 6.455317 |         |            | 6.449437 |         |            |
| 21407,   | 281992, | 2585.4124, | 21445,   | 288110, | 2583.0592, | 21483,   | 290142, | 2580.7060, |
| 6.461043 |         |            | 6.455163 |         |            | 6.449282 |         |            |
| 21408,   | 282108, | 2585.3505, | 21446,   | 287872, | 2582.9972, | 21484,   | 289250, | 2580.6440, |
| 6.460889 |         |            | 6.455008 |         |            | 6.449127 |         |            |
| 21409,   | 282620, | 2585.2885, | 21447,   | 286992, | 2582.9353, | 21485,   | 288048, | 2580.5821, |
| 6.460734 |         |            | 6.454853 |         |            | 6.448972 |         |            |
| 21410,   | 283512, | 2585.2266, | 21448,   | 286072, | 2582.8734, | 21486,   | 287246, | 2580.5202, |
| 6.460579 |         |            | 6.454698 |         |            | 6.448818 |         |            |
| 21411,   | 284570, | 2585.1647, | 21449,   | 285638, | 2582.8115, | 21487,   | 287106, | 2580.4582, |
| 6.460424 |         |            | 6.454544 |         |            | 6.448663 |         |            |
| 21412,   | 285394, | 2585.1028, | 21450,   | 285688, | 2582.7495, | 21488,   | 287270, | 2580.3963, |
| 6.460270 |         |            | 6.454389 |         |            | 6.448508 |         |            |
| 21413,   | 285702, | 2585.0408, | 21451,   | 285842, | 2582.6876, | 21489,   | 287216, | 2580.3344, |
| 6.460115 |         |            | 6.454234 |         |            | 6.448353 |         |            |
| 21414,   | 285604, | 2584.9789, | 21452,   | 285846, | 2582.6257, | 21490,   | 286906, | 2580.2725, |
| 6.459960 |         |            | 6.454079 |         |            | 6.448199 |         |            |
| 21415,   | 285542, | 2584.9170, | 21453,   | 285826, | 2582.5638, | 21491,   | 286760, | 2580.2105, |
| 6.459805 |         |            | 6.453925 |         |            | 6.448044 |         |            |
| 21416,   | 285816, | 2584.8551, | 21454,   | 286026, | 2582.5018, | 21492,   | 287102, | 2580.1486, |
| 6.459651 |         |            | 6.453770 |         |            | 6.447889 |         |            |
| 21417,   | 286254, | 2584.7931, | 21455,   | 286458, | 2582.4399, | 21493,   | 287666, | 2580.0867, |
| 6.459496 |         |            | 6.453615 |         |            | 6.447734 |         |            |
| 21418,   | 286396, | 2584.7312, | 21456,   | 286886, | 2582.3780, | 21494,   | 287852, | 2580.0248, |
| 6.459341 |         |            | 6.453460 |         |            | 6.447580 |         |            |
| 21419,   | 285986, | 2584.6693, | 21457,   | 287142, | 2582.3161, | 21495,   | 287398, | 2579.9628, |
| 6.459186 |         |            | 6.453306 |         |            | 6.447425 |         |            |
| 21420,   | 285288, | 2584.6073, | 21458,   | 287338, | 2582.2541, | 21496,   | 286752, | 2579.9009, |
| 6.459032 |         |            | 6.453151 |         |            | 6.447270 |         |            |
| 21421,   | 284840, | 2584.5454, | 21459,   | 287674, | 2582.1922, | 21497,   | 286664, | 2579.8390, |
| 6.458877 |         |            | 6.452996 |         |            | 6.447115 |         |            |
| 21422,   | 284968, | 2584.4835, | 21460,   | 288084, | 2582.1303, | 21498,   | 287448, | 2579.7771, |
| 6.458722 |         |            | 6.452841 |         |            | 6.446961 |         |            |
| 21423,   | 285576, | 2584.4216, | 21461,   | 288206, | 2582.0683, | 21499,   | 288670, | 2579.7151, |
| 6.458567 |         |            | 6.452687 |         |            | 6.446806 |         |            |
| 21424,   | 286350, | 2584.3596, | 21462,   | 287760, | 2582.0064, | 21500,   | 289628, | 2579.6532, |
| 6.458413 |         |            | 6.452532 |         |            | 6.446651 |         |            |
| 21425,   | 287132, | 2584.2977, | 21463,   | 286910, | 2581.9445, | 21501,   | 289996, | 2579.5913, |
| 6.458258 |         |            | 6.452377 |         |            | 6.446496 |         |            |
| 21426,   | 287908, | 2584.2358, | 21464,   | 286154, | 2581.8826, | 21502,   | 289980, | 2579.5293, |
| 6.458103 |         |            | 6.452222 |         |            | 6.446342 |         |            |
| 21427,   | 288554, | 2584.1739, | 21465,   | 285834, | 2581.8206, | 21503,   | 289880, | 2579.4674, |
| 6.457948 |         |            | 6.452068 |         |            | 6.446187 |         |            |
| 21428,   | 288750, | 2584.1119, | 21466,   | 285846, | 2581.7587, | 21504,   | 289692, | 2579.4055, |
| 6.457794 |         |            | 6.451913 |         |            | 6.446032 |         |            |
| 21429,   | 288278, | 2584.0500, | 21467,   | 285818, | 2581.6968, | 21505,   | 289182, | 2579.3436, |
| 6.457639 |         |            | 6.451758 |         |            | 6.445877 |         |            |
| 21430,   | 287402, | 2583.9881, | 21468,   | 285620, | 2581.6349, | 21506,   | 288346, | 2579.2816, |
| 6.457484 |         |            | 6.451603 |         |            | 6.445722 |         |            |
| 21431,   | 286830, | 2583.9262, | 21469,   | 285550, | 2581.5729, | 21507,   | 287548, | 2579.2197, |
| 6.457329 |         |            | 6.451449 |         |            | 6.445568 |         |            |
| 21432,   | 287148, | 2583.8642, | 21470,   | 285934, | 2581.5110, | 21508,   | 287184, | 2579.1578, |
| 6.457175 |         |            | 6.451294 |         |            | 6.445413 |         |            |
| 21433,   | 288238, | 2583.8023, | 21471,   | 286724, | 2581.4491, | 21509,   | 287206, | 2579.0959, |
| 6.457020 |         |            | 6.451139 |         |            | 6.445258 |         |            |
| 21434,   | 289376, | 2583.7404, | 21472,   | 287484, | 2581.3871, | 21510,   | 287168, | 2579.0339, |
| 6.456865 |         |            | 6.450984 |         |            | 6.445103 |         |            |
| 21435,   | 289872, | 2583.6784, | 21473,   | 287830, | 2581.3252, | 21511,   | 286800, | 2578.9720, |
| 6.456710 |         |            | 6.450829 |         |            | 6.444949 |         |            |
| 21436,   | 289648, | 2583.6165, | 21474,   | 287846, | 2581.2633, | 21512,   | 286394, | 2578.9101, |
| 6.456556 |         |            | 6.450675 |         |            | 6.444794 |         |            |
| 21437,   | 289156, | 2583.5546, | 21475,   | 287926, | 2581.2014, | 21513,   | 286592, | 2578.8481, |
| 6.456401 |         |            | 6.450520 |         |            | 6.444639 |         |            |
| 21438,   | 288798, | 2583.4927, | 21476,   | 288286, | 2581.1394, | 21514,   | 287664, | 2578.7862, |
| 6.456246 |         |            | 6.450365 |         |            | 6.444484 |         |            |
| 21439,   | 288508, | 2583.4307, | 21477,   | 288758, | 2581.0775, | 21515,   | 289174, | 2578.7243, |
| 6.456091 |         |            | 6.450210 |         |            | 6.444330 |         |            |
| 21440,   | 288006, | 2583.3688, | 21478,   | 289038, | 2581.0156, | 21516,   | 290348, | 2578.6624, |
| 6.455936 |         |            | 6.450056 |         |            | 6.444175 |         |            |



|          |         |            |          |         |            |          |         |            |
|----------|---------|------------|----------|---------|------------|----------|---------|------------|
| 21517,   | 290818, | 2578.6004, | 21555,   | 290880, | 2576.2472, | 21593,   | 290974, | 2573.8940, |
| 6.444020 |         |            | 6.438139 |         |            | 6.432259 |         |            |
| 21518,   | 290900, | 2578.5385, | 21556,   | 290068, | 2576.1853, | 21594,   | 289940, | 2573.8321, |
| 6.443865 |         |            | 6.437985 |         |            | 6.432104 |         |            |
| 21519,   | 291122, | 2578.4766, | 21557,   | 289680, | 2576.1234, | 21595,   | 289448, | 2573.7701, |
| 6.443711 |         |            | 6.437830 |         |            | 6.431949 |         |            |
| 21520,   | 291590, | 2578.4147, | 21558,   | 289748, | 2576.0614, | 21596,   | 289488, | 2573.7082, |
| 6.443556 |         |            | 6.437675 |         |            | 6.431794 |         |            |
| 21521,   | 291904, | 2578.3527, | 21559,   | 289956, | 2575.9995, | 21597,   | 289682, | 2573.6463, |
| 6.443401 |         |            | 6.437520 |         |            | 6.431640 |         |            |
| 21522,   | 291684, | 2578.2908, | 21560,   | 290024, | 2575.9376, | 21598,   | 289810, | 2573.5844, |
| 6.443246 |         |            | 6.437366 |         |            | 6.431485 |         |            |
| 21523,   | 291120, | 2578.2289, | 21561,   | 289934, | 2575.8757, | 21599,   | 290068, | 2573.5224, |
| 6.443092 |         |            | 6.437211 |         |            | 6.431330 |         |            |
| 21524,   | 290824, | 2578.1670, | 21562,   | 289860, | 2575.8137, | 21600,   | 290740, | 2573.4605, |
| 6.442937 |         |            | 6.437056 |         |            | 6.431175 |         |            |
| 21525,   | 291202, | 2578.1050, | 21563,   | 289876, | 2575.7518, | 21601,   | 291750, | 2573.3986, |
| 6.442782 |         |            | 6.436901 |         |            | 6.431021 |         |            |
| 21526,   | 292042, | 2578.0431, | 21564,   | 289938, | 2575.6899, | 21602,   | 292668, | 2573.3367, |
| 6.442627 |         |            | 6.436747 |         |            | 6.430866 |         |            |
| 21527,   | 292732, | 2577.9812, | 21565,   | 290046, | 2575.6279, | 21603,   | 293144, | 2573.2747, |
| 6.442473 |         |            | 6.436592 |         |            | 6.430711 |         |            |
| 21528,   | 292880, | 2577.9192, | 21566,   | 290354, | 2575.5660, | 21604,   | 293296, | 2573.2128, |
| 6.442318 |         |            | 6.436437 |         |            | 6.430556 |         |            |
| 21529,   | 292622, | 2577.8573, | 21567,   | 290992, | 2575.5041, | 21605,   | 293542, | 2573.1509, |
| 6.442163 |         |            | 6.436282 |         |            | 6.430401 |         |            |
| 21530,   | 292324, | 2577.7954, | 21568,   | 291768, | 2575.4422, | 21606,   | 294070, | 2573.0889, |
| 6.442008 |         |            | 6.436128 |         |            | 6.430247 |         |            |
| 21531,   | 292096, | 2577.7335, | 21569,   | 292184, | 2575.3802, | 21607,   | 294614, | 2573.0270, |
| 6.441854 |         |            | 6.435973 |         |            | 6.430092 |         |            |
| 21532,   | 291700, | 2577.6715, | 21570,   | 291898, | 2575.3183, | 21608,   | 294776, | 2572.9651, |
| 6.441699 |         |            | 6.435818 |         |            | 6.429937 |         |            |
| 21533,   | 290892, | 2577.6096, | 21571,   | 291078, | 2575.2564, | 21609,   | 294504, | 2572.9032, |
| 6.441544 |         |            | 6.435663 |         |            | 6.429782 |         |            |
| 21534,   | 289804, | 2577.5477, | 21572,   | 290316, | 2575.1945, | 21610,   | 294202, | 2572.8412, |
| 6.441389 |         |            | 6.435508 |         |            | 6.429628 |         |            |
| 21535,   | 288832, | 2577.4858, | 21573,   | 290062, | 2575.1325, | 21611,   | 294240, | 2572.7793, |
| 6.441235 |         |            | 6.435354 |         |            | 6.429473 |         |            |
| 21536,   | 288292, | 2577.4238, | 21574,   | 290172, | 2575.0706, | 21612,   | 294530, | 2572.7174, |
| 6.441080 |         |            | 6.435199 |         |            | 6.429318 |         |            |
| 21537,   | 288116, | 2577.3619, | 21575,   | 290104, | 2575.0087, | 21613,   | 294624, | 2572.6555, |
| 6.440925 |         |            | 6.435044 |         |            | 6.429163 |         |            |
| 21538,   | 288060, | 2577.3000, | 21576,   | 289532, | 2574.9468, | 21614,   | 294270, | 2572.5935, |
| 6.440770 |         |            | 6.434889 |         |            | 6.429009 |         |            |
| 21539,   | 288002, | 2577.2380, | 21577,   | 288718, | 2574.8848, | 21615,   | 293754, | 2572.5316, |
| 6.440615 |         |            | 6.434735 |         |            | 6.428854 |         |            |
| 21540,   | 288052, | 2577.1761, | 21578,   | 288252, | 2574.8229, | 21616,   | 293606, | 2572.4697, |
| 6.440461 |         |            | 6.434580 |         |            | 6.428699 |         |            |
| 21541,   | 288274, | 2577.1142, | 21579,   | 288402, | 2574.7610, | 21617,   | 293990, | 2572.4077, |
| 6.440306 |         |            | 6.434425 |         |            | 6.428544 |         |            |
| 21542,   | 288544, | 2577.0523, | 21580,   | 288878, | 2574.6990, | 21618,   | 294504, | 2572.3458, |
| 6.440151 |         |            | 6.434270 |         |            | 6.428390 |         |            |
| 21543,   | 288646, | 2576.9903, | 21581,   | 289148, | 2574.6371, | 21619,   | 294578, | 2572.2839, |
| 6.439996 |         |            | 6.434116 |         |            | 6.428235 |         |            |
| 21544,   | 288572, | 2576.9284, | 21582,   | 289024, | 2574.5752, | 21620,   | 294078, | 2572.2220, |
| 6.439842 |         |            | 6.433961 |         |            | 6.428080 |         |            |
| 21545,   | 288634, | 2576.8665, | 21583,   | 288778, | 2574.5133, | 21621,   | 293406, | 2572.1600, |
| 6.439687 |         |            | 6.433806 |         |            | 6.427925 |         |            |
| 21546,   | 289130, | 2576.8046, | 21584,   | 288770, | 2574.4513, | 21622,   | 293038, | 2572.0981, |
| 6.439532 |         |            | 6.433651 |         |            | 6.427771 |         |            |
| 21547,   | 290024, | 2576.7426, | 21585,   | 289048, | 2574.3894, | 21623,   | 293034, | 2572.0362, |
| 6.439377 |         |            | 6.433497 |         |            | 6.427616 |         |            |
| 21548,   | 290952, | 2576.6807, | 21586,   | 289386, | 2574.3275, | 21624,   | 293108, | 2571.9743, |
| 6.439223 |         |            | 6.433342 |         |            | 6.427461 |         |            |
| 21549,   | 291570, | 2576.6188, | 21587,   | 289688, | 2574.2656, | 21625,   | 293052, | 2571.9123, |
| 6.439068 |         |            | 6.433187 |         |            | 6.427306 |         |            |
| 21550,   | 291866, | 2576.5569, | 21588,   | 290140, | 2574.2036, | 21626,   | 293026, | 2571.8504, |
| 6.438913 |         |            | 6.433032 |         |            | 6.427152 |         |            |
| 21551,   | 292058, | 2576.4949, | 21589,   | 290936, | 2574.1417, | 21627,   | 293284, | 2571.7885, |
| 6.438758 |         |            | 6.432878 |         |            | 6.426997 |         |            |
| 21552,   | 292240, | 2576.4330, | 21590,   | 291870, | 2574.0798, | 21628,   | 293778, | 2571.7266, |
| 6.438604 |         |            | 6.432723 |         |            | 6.426842 |         |            |
| 21553,   | 292208, | 2576.3711, | 21591,   | 292368, | 2574.0178, | 21629,   | 294116, | 2571.6646, |
| 6.438449 |         |            | 6.432568 |         |            | 6.426687 |         |            |
| 21554,   | 291728, | 2576.3091, | 21592,   | 292006, | 2573.9559, | 21630,   | 293996, | 2571.6027, |
| 6.438294 |         |            | 6.432413 |         |            | 6.426533 |         |            |

|          |         |            |          |         |            |          |         |            |
|----------|---------|------------|----------|---------|------------|----------|---------|------------|
| 21631,   | 293614, | 2571.5408, | 21669,   | 291202, | 2569.1875, | 21707,   | 295652, | 2566.8343, |
| 6.426378 |         |            | 6.420497 |         |            | 6.414616 |         |            |
| 21632,   | 293472, | 2571.4788, | 21670,   | 290240, | 2569.1256, | 21708,   | 294872, | 2566.7724, |
| 6.426223 |         |            | 6.420342 |         |            | 6.414461 |         |            |
| 21633,   | 293850, | 2571.4169, | 21671,   | 289928, | 2569.0637, | 21709,   | 294128, | 2566.7105, |
| 6.426068 |         |            | 6.420187 |         |            | 6.414307 |         |            |
| 21634,   | 294466, | 2571.3550, | 21672,   | 290078, | 2569.0018, | 21710,   | 293610, | 2566.6485, |
| 6.425914 |         |            | 6.420033 |         |            | 6.414152 |         |            |
| 21635,   | 294818, | 2571.2931, | 21673,   | 290136, | 2568.9398, | 21711,   | 293314, | 2566.5866, |
| 6.425759 |         |            | 6.419878 |         |            | 6.413997 |         |            |
| 21636,   | 294736, | 2571.2311, | 21674,   | 289778, | 2568.8779, | 21712,   | 293208, | 2566.5247, |
| 6.425604 |         |            | 6.419723 |         |            | 6.413842 |         |            |
| 21637,   | 294590, | 2571.1692, | 21675,   | 289280, | 2568.8160, | 21713,   | 293292, | 2566.4628, |
| 6.425449 |         |            | 6.419568 |         |            | 6.413688 |         |            |
| 21638,   | 294816, | 2571.1073, | 21676,   | 289192, | 2568.7541, | 21714,   | 293460, | 2566.4008, |
| 6.425294 |         |            | 6.419414 |         |            | 6.413533 |         |            |
| 21639,   | 295402, | 2571.0454, | 21677,   | 289794, | 2568.6921, | 21715,   | 293488, | 2566.3389, |
| 6.425140 |         |            | 6.419259 |         |            | 6.413378 |         |            |
| 21640,   | 295856, | 2570.9834, | 21678,   | 290856, | 2568.6302, | 21716,   | 293214, | 2566.2770, |
| 6.424985 |         |            | 6.419104 |         |            | 6.413223 |         |            |
| 21641,   | 295768, | 2570.9215, | 21679,   | 291926, | 2568.5683, | 21717,   | 292816, | 2566.2151, |
| 6.424830 |         |            | 6.418949 |         |            | 6.413069 |         |            |
| 21642,   | 295260, | 2570.8596, | 21680,   | 292722, | 2568.5064, | 21718,   | 292734, | 2566.1531, |
| 6.424675 |         |            | 6.418795 |         |            | 6.412914 |         |            |
| 21643,   | 294832, | 2570.7976, | 21681,   | 293218, | 2568.4444, | 21719,   | 293260, | 2566.0912, |
| 6.424521 |         |            | 6.418640 |         |            | 6.412759 |         |            |
| 21644,   | 294758, | 2570.7357, | 21682,   | 293448, | 2568.3825, | 21720,   | 294178, | 2566.0293, |
| 6.424366 |         |            | 6.418485 |         |            | 6.412604 |         |            |
| 21645,   | 294774, | 2570.6738, | 21683,   | 293360, | 2568.3206, | 21721,   | 294922, | 2565.9674, |
| 6.424211 |         |            | 6.418330 |         |            | 6.412450 |         |            |
| 21646,   | 294406, | 2570.6119, | 21684,   | 292994, | 2568.2586, | 21722,   | 295114, | 2565.9054, |
| 6.424056 |         |            | 6.418176 |         |            | 6.412295 |         |            |
| 21647,   | 293546, | 2570.5499, | 21685,   | 292626, | 2568.1967, | 21723,   | 294928, | 2565.8435, |
| 6.423902 |         |            | 6.418021 |         |            | 6.412140 |         |            |
| 21648,   | 292618, | 2570.4880, | 21686,   | 292656, | 2568.1348, | 21724,   | 294860, | 2565.7816, |
| 6.423747 |         |            | 6.417866 |         |            | 6.411985 |         |            |
| 21649,   | 292120, | 2570.4261, | 21687,   | 293206, | 2568.0729, | 21725,   | 295158, | 2565.7196, |
| 6.423592 |         |            | 6.417711 |         |            | 6.411831 |         |            |
| 21650,   | 292048, | 2570.3642, | 21688,   | 293928, | 2568.0109, | 21726,   | 295552, | 2565.6577, |
| 6.423437 |         |            | 6.417557 |         |            | 6.411676 |         |            |
| 21651,   | 291964, | 2570.3022, | 21689,   | 294296, | 2567.9490, | 21727,   | 295628, | 2565.5958, |
| 6.423283 |         |            | 6.417402 |         |            | 6.411521 |         |            |
| 21652,   | 291492, | 2570.2403, | 21690,   | 294118, | 2567.8871, | 21728,   | 295362, | 2565.5339, |
| 6.423128 |         |            | 6.417247 |         |            | 6.411366 |         |            |
| 21653,   | 290780, | 2570.1784, | 21691,   | 293748, | 2567.8252, | 21729,   | 295204, | 2565.4719, |
| 6.422973 |         |            | 6.417092 |         |            | 6.411212 |         |            |
| 21654,   | 290324, | 2570.1165, | 21692,   | 293684, | 2567.7632, | 21730,   | 295574, | 2565.4100, |
| 6.422818 |         |            | 6.416938 |         |            | 6.411057 |         |            |
| 21655,   | 290416, | 2570.0545, | 21693,   | 294034, | 2567.7013, | 21731,   | 296316, | 2565.3481, |
| 6.422664 |         |            | 6.416783 |         |            | 6.410902 |         |            |
| 21656,   | 290850, | 2569.9926, | 21694,   | 294430, | 2567.6394, | 21732,   | 296840, | 2565.2862, |
| 6.422509 |         |            | 6.416628 |         |            | 6.410747 |         |            |
| 21657,   | 291184, | 2569.9307, | 21695,   | 294486, | 2567.5775, | 21733,   | 296710, | 2565.2242, |
| 6.422354 |         |            | 6.416473 |         |            | 6.410592 |         |            |
| 21658,   | 291244, | 2569.8687, | 21696,   | 294254, | 2567.5155, | 21734,   | 296114, | 2565.1623, |
| 6.422199 |         |            | 6.416319 |         |            | 6.410438 |         |            |
| 21659,   | 291242, | 2569.8068, | 21697,   | 294180, | 2567.4536, | 21735,   | 295600, | 2565.1004, |
| 6.422045 |         |            | 6.416164 |         |            | 6.410283 |         |            |
| 21660,   | 291444, | 2569.7449, | 21698,   | 294572, | 2567.3917, | 21736,   | 295406, | 2565.0384, |
| 6.421890 |         |            | 6.416009 |         |            | 6.410128 |         |            |
| 21661,   | 291818, | 2569.6830, | 21699,   | 295218, | 2567.3297, | 21737,   | 295178, | 2564.9765, |
| 6.421735 |         |            | 6.415854 |         |            | 6.409973 |         |            |
| 21662,   | 292104, | 2569.6210, | 21700,   | 295614, | 2567.2678, | 21738,   | 294402, | 2564.9146, |
| 6.421580 |         |            | 6.415699 |         |            | 6.409819 |         |            |
| 21663,   | 292190, | 2569.5591, | 21701,   | 295502, | 2567.2059, | 21739,   | 293138, | 2564.8527, |
| 6.421426 |         |            | 6.415545 |         |            | 6.409664 |         |            |
| 21664,   | 292286, | 2569.4972, | 21702,   | 295164, | 2567.1440, | 21740,   | 292120, | 2564.7907, |
| 6.421271 |         |            | 6.415390 |         |            | 6.409509 |         |            |
| 21665,   | 292614, | 2569.4353, | 21703,   | 295102, | 2567.0820, | 21741,   | 292150, | 2564.7288, |
| 6.421116 |         |            | 6.415235 |         |            | 6.409354 |         |            |
| 21666,   | 293030, | 2569.3733, | 21704,   | 295486, | 2567.0201, | 21742,   | 293308, | 2564.6669, |
| 6.420961 |         |            | 6.415080 |         |            | 6.409200 |         |            |
| 21667,   | 293056, | 2569.3114, | 21705,   | 295988, | 2566.9582, | 21743,   | 294884, | 2564.6050, |
| 6.420806 |         |            | 6.414926 |         |            | 6.409045 |         |            |
| 21668,   | 292360, | 2569.2495, | 21706,   | 296104, | 2566.8963, | 21744,   | 296026, | 2564.5430, |
| 6.420652 |         |            | 6.414771 |         |            | 6.408890 |         |            |

|          |         |            |          |         |            |          |         |            |
|----------|---------|------------|----------|---------|------------|----------|---------|------------|
| 21745,   | 296464, | 2564.4811, | 21783,   | 294834, | 2562.1279, | 21821,   | 298970, | 2559.7747, |
| 6.408735 |         |            | 6.402855 |         |            | 6.396974 |         |            |
| 21746,   | 296564, | 2564.4192, | 21784,   | 295114, | 2562.0660, | 21822,   | 298180, | 2559.7127, |
| 6.408581 |         |            | 6.402700 |         |            | 6.396819 |         |            |
| 21747,   | 296768, | 2564.3573, | 21785,   | 295802, | 2562.0040, | 21823,   | 297612, | 2559.6508, |
| 6.408426 |         |            | 6.402545 |         |            | 6.396664 |         |            |
| 21748,   | 297108, | 2564.2953, | 21786,   | 296680, | 2561.9421, | 21824,   | 297286, | 2559.5889, |
| 6.408271 |         |            | 6.402390 |         |            | 6.396510 |         |            |
| 21749,   | 297284, | 2564.2334, | 21787,   | 297318, | 2561.8802, | 21825,   | 297078, | 2559.5270, |
| 6.408116 |         |            | 6.402236 |         |            | 6.396355 |         |            |
| 21750,   | 297112, | 2564.1715, | 21788,   | 297486, | 2561.8182, | 21826,   | 296968, | 2559.4650, |
| 6.407962 |         |            | 6.402081 |         |            | 6.396200 |         |            |
| 21751,   | 296756, | 2564.1095, | 21789,   | 297312, | 2561.7563, | 21827,   | 297048, | 2559.4031, |
| 6.407807 |         |            | 6.401926 |         |            | 6.396045 |         |            |
| 21752,   | 296496, | 2564.0476, | 21790,   | 297084, | 2561.6944, | 21828,   | 297292, | 2559.3412, |
| 6.407652 |         |            | 6.401771 |         |            | 6.395891 |         |            |
| 21753,   | 296382, | 2563.9857, | 21791,   | 296936, | 2561.6325, | 21829,   | 297492, | 2559.2792, |
| 6.407497 |         |            | 6.401617 |         |            | 6.395736 |         |            |
| 21754,   | 296198, | 2563.9238, | 21792,   | 296804, | 2561.5705, | 21830,   | 297462, | 2559.2173, |
| 6.407343 |         |            | 6.401462 |         |            | 6.395581 |         |            |
| 21755,   | 295820, | 2563.8618, | 21793,   | 296574, | 2561.5086, | 21831,   | 297282, | 2559.1554, |
| 6.407188 |         |            | 6.401307 |         |            | 6.395426 |         |            |
| 21756,   | 295430, | 2563.7999, | 21794,   | 296270, | 2561.4467, | 21832,   | 297212, | 2559.0935, |
| 6.407033 |         |            | 6.401152 |         |            | 6.395271 |         |            |
| 21757,   | 295340, | 2563.7380, | 21795,   | 295972, | 2561.3848, | 21833,   | 297406, | 2559.0315, |
| 6.406878 |         |            | 6.400998 |         |            | 6.395117 |         |            |
| 21758,   | 295590, | 2563.6761, | 21796,   | 295676, | 2561.3228, | 21834,   | 297682, | 2558.9696, |
| 6.406724 |         |            | 6.400843 |         |            | 6.394962 |         |            |
| 21759,   | 295862, | 2563.6141, | 21797,   | 295298, | 2561.2609, | 21835,   | 297694, | 2558.9077, |
| 6.406569 |         |            | 6.400688 |         |            | 6.394807 |         |            |
| 21760,   | 295804, | 2563.5522, | 21798,   | 294780, | 2561.1990, | 21836,   | 297320, | 2558.8458, |
| 6.406414 |         |            | 6.400533 |         |            | 6.394652 |         |            |
| 21761,   | 295418, | 2563.4903, | 21799,   | 294236, | 2561.1371, | 21837,   | 296816, | 2558.7838, |
| 6.406259 |         |            | 6.400378 |         |            | 6.394498 |         |            |
| 21762,   | 295084, | 2563.4283, | 21800,   | 293814, | 2561.0751, | 21838,   | 296558, | 2558.7219, |
| 6.406105 |         |            | 6.400224 |         |            | 6.394343 |         |            |
| 21763,   | 295132, | 2563.3664, | 21801,   | 293558, | 2561.0132, | 21839,   | 296664, | 2558.6600, |
| 6.405950 |         |            | 6.400069 |         |            | 6.394188 |         |            |
| 21764,   | 295520, | 2563.3045, | 21802,   | 293364, | 2560.9513, | 21840,   | 296946, | 2558.5980, |
| 6.405795 |         |            | 6.399914 |         |            | 6.394033 |         |            |
| 21765,   | 295922, | 2563.2426, | 21803,   | 293158, | 2560.8893, | 21841,   | 297186, | 2558.5361, |
| 6.405640 |         |            | 6.399759 |         |            | 6.393879 |         |            |
| 21766,   | 296138, | 2563.1806, | 21804,   | 293088, | 2560.8274, | 21842,   | 297382, | 2558.4742, |
| 6.405485 |         |            | 6.399605 |         |            | 6.393724 |         |            |
| 21767,   | 296272, | 2563.1187, | 21805,   | 293360, | 2560.7655, | 21843,   | 297654, | 2558.4123, |
| 6.405331 |         |            | 6.399450 |         |            | 6.393569 |         |            |
| 21768,   | 296522, | 2563.0568, | 21806,   | 293968, | 2560.7036, | 21844,   | 297940, | 2558.3503, |
| 6.405176 |         |            | 6.399295 |         |            | 6.393414 |         |            |
| 21769,   | 296858, | 2562.9949, | 21807,   | 294630, | 2560.6416, | 21845,   | 297890, | 2558.2884, |
| 6.405021 |         |            | 6.399140 |         |            | 6.393260 |         |            |
| 21770,   | 297004, | 2562.9329, | 21808,   | 295026, | 2560.5797, | 21846,   | 297224, | 2558.2265, |
| 6.404866 |         |            | 6.398986 |         |            | 6.393105 |         |            |
| 21771,   | 296810, | 2562.8710, | 21809,   | 295150, | 2560.5178, | 21847,   | 296072, | 2558.1646, |
| 6.404712 |         |            | 6.398831 |         |            | 6.392950 |         |            |
| 21772,   | 296528, | 2562.8091, | 21810,   | 295314, | 2560.4559, | 21848,   | 294964, | 2558.1026, |
| 6.404557 |         |            | 6.398676 |         |            | 6.392795 |         |            |
| 21773,   | 296576, | 2562.7472, | 21811,   | 295808, | 2560.3939, | 21849,   | 294366, | 2558.0407, |
| 6.404402 |         |            | 6.398521 |         |            | 6.392641 |         |            |
| 21774,   | 297082, | 2562.6852, | 21812,   | 296502, | 2560.3320, | 21850,   | 294284, | 2557.9788, |
| 6.404247 |         |            | 6.398367 |         |            | 6.392486 |         |            |
| 21775,   | 297656, | 2562.6233, | 21813,   | 296974, | 2560.2701, | 21851,   | 294362, | 2557.9169, |
| 6.404093 |         |            | 6.398212 |         |            | 6.392331 |         |            |
| 21776,   | 297712, | 2562.5614, | 21814,   | 296990, | 2560.2081, | 21852,   | 294362, | 2557.8549, |
| 6.403938 |         |            | 6.398057 |         |            | 6.392176 |         |            |
| 21777,   | 297054, | 2562.4994, | 21815,   | 296802, | 2560.1462, | 21853,   | 294440, | 2557.7930, |
| 6.403783 |         |            | 6.397902 |         |            | 6.392022 |         |            |
| 21778,   | 296040, | 2562.4375, | 21816,   | 296974, | 2560.0843, | 21854,   | 294892, | 2557.7311, |
| 6.403628 |         |            | 6.397748 |         |            | 6.391867 |         |            |
| 21779,   | 295244, | 2562.3756, | 21817,   | 297790, | 2560.0224, | 21855,   | 295720, | 2557.6691, |
| 6.403474 |         |            | 6.397593 |         |            | 6.391712 |         |            |
| 21780,   | 294910, | 2562.3137, | 21818,   | 298904, | 2559.9604, | 21856,   | 296502, | 2557.6072, |
| 6.403319 |         |            | 6.397438 |         |            | 6.391557 |         |            |
| 21781,   | 294864, | 2562.2517, | 21819,   | 299654, | 2559.8985, | 21857,   | 296830, | 2557.5453, |
| 6.403164 |         |            | 6.397283 |         |            | 6.391403 |         |            |
| 21782,   | 294836, | 2562.1898, | 21820,   | 299624, | 2559.8366, | 21858,   | 296748, | 2557.4834, |
| 6.403009 |         |            | 6.397129 |         |            | 6.391248 |         |            |

|          |         |            |          |         |            |          |         |            |
|----------|---------|------------|----------|---------|------------|----------|---------|------------|
| 21859,   | 296700, | 2557.4214, | 21897,   | 297710, | 2555.0682, | 21935,   | 298988, | 2552.7150, |
| 6.391093 |         |            | 6.385212 |         |            | 6.379331 |         |            |
| 21860,   | 297012, | 2557.3595, | 21898,   | 297590, | 2555.0063, | 21936,   | 299392, | 2552.6531, |
| 6.390938 |         |            | 6.385057 |         |            | 6.379177 |         |            |
| 21861,   | 297506, | 2557.2976, | 21899,   | 297794, | 2554.9444, | 21937,   | 300592, | 2552.5911, |
| 6.390784 |         |            | 6.384903 |         |            | 6.379022 |         |            |
| 21862,   | 297690, | 2557.2357, | 21900,   | 297882, | 2554.8824, | 21938,   | 301856, | 2552.5292, |
| 6.390629 |         |            | 6.384748 |         |            | 6.378867 |         |            |
| 21863,   | 297372, | 2557.1737, | 21901,   | 297532, | 2554.8205, | 21939,   | 302596, | 2552.4673, |
| 6.390474 |         |            | 6.384593 |         |            | 6.378712 |         |            |
| 21864,   | 296894, | 2557.1118, | 21902,   | 296908, | 2554.7586, | 21940,   | 302840, | 2552.4054, |
| 6.390319 |         |            | 6.384438 |         |            | 6.378558 |         |            |
| 21865,   | 296774, | 2557.0499, | 21903,   | 296492, | 2554.6967, | 21941,   | 302954, | 2552.3434, |
| 6.390164 |         |            | 6.384284 |         |            | 6.378403 |         |            |
| 21866,   | 297104, | 2556.9879, | 21904,   | 296656, | 2554.6347, | 21942,   | 303116, | 2552.2815, |
| 6.390010 |         |            | 6.384129 |         |            | 6.378248 |         |            |
| 21867,   | 297442, | 2556.9260, | 21905,   | 297370, | 2554.5728, | 21943,   | 303134, | 2552.2196, |
| 6.389855 |         |            | 6.383974 |         |            | 6.378093 |         |            |
| 21868,   | 297332, | 2556.8641, | 21906,   | 298326, | 2554.5109, | 21944,   | 302784, | 2552.1577, |
| 6.389700 |         |            | 6.383819 |         |            | 6.377939 |         |            |
| 21869,   | 296874, | 2556.8022, | 21907,   | 299244, | 2554.4489, | 21945,   | 302222, | 2552.0957, |
| 6.389545 |         |            | 6.383665 |         |            | 6.377784 |         |            |
| 21870,   | 296706, | 2556.7402, | 21908,   | 299970, | 2554.3870, | 21946,   | 301866, | 2552.0338, |
| 6.389391 |         |            | 6.383510 |         |            | 6.377629 |         |            |
| 21871,   | 297332, | 2556.6783, | 21909,   | 300398, | 2554.3251, | 21947,   | 301944, | 2551.9719, |
| 6.389236 |         |            | 6.383355 |         |            | 6.377474 |         |            |
| 21872,   | 298588, | 2556.6164, | 21910,   | 300364, | 2554.2632, | 21948,   | 302202, | 2551.9099, |
| 6.389081 |         |            | 6.383200 |         |            | 6.377320 |         |            |
| 21873,   | 299780, | 2556.5545, | 21911,   | 299844, | 2554.2012, | 21949,   | 302180, | 2551.8480, |
| 6.388926 |         |            | 6.383046 |         |            | 6.377165 |         |            |
| 21874,   | 300362, | 2556.4925, | 21912,   | 299084, | 2554.1393, | 21950,   | 301698, | 2551.7861, |
| 6.388772 |         |            | 6.382891 |         |            | 6.377010 |         |            |
| 21875,   | 300364, | 2556.4306, | 21913,   | 298534, | 2554.0774, | 21951,   | 301046, | 2551.7242, |
| 6.388617 |         |            | 6.382736 |         |            | 6.376855 |         |            |
| 21876,   | 300216, | 2556.3687, | 21914,   | 298454, | 2554.0155, | 21952,   | 300628, | 2551.6622, |
| 6.388462 |         |            | 6.382581 |         |            | 6.376701 |         |            |
| 21877,   | 300188, | 2556.3068, | 21915,   | 298664, | 2553.9535, | 21953,   | 300522, | 2551.6003, |
| 6.388307 |         |            | 6.382427 |         |            | 6.376546 |         |            |
| 21878,   | 300150, | 2556.2448, | 21916,   | 298704, | 2553.8916, | 21954,   | 300486, | 2551.5384, |
| 6.388153 |         |            | 6.382272 |         |            | 6.376391 |         |            |
| 21879,   | 299872, | 2556.1829, | 21917,   | 298276, | 2553.8297, | 21955,   | 300350, | 2551.4765, |
| 6.387998 |         |            | 6.382117 |         |            | 6.376236 |         |            |
| 21880,   | 299444, | 2556.1210, | 21918,   | 297500, | 2553.7678, | 21956,   | 300270, | 2551.4145, |
| 6.387843 |         |            | 6.381962 |         |            | 6.376082 |         |            |
| 21881,   | 299310, | 2556.0590, | 21919,   | 296756, | 2553.7058, | 21957,   | 300528, | 2551.3526, |
| 6.387688 |         |            | 6.381808 |         |            | 6.375927 |         |            |
| 21882,   | 299774, | 2555.9971, | 21920,   | 296282, | 2553.6439, | 21958,   | 301088, | 2551.2907, |
| 6.387534 |         |            | 6.381653 |         |            | 6.375772 |         |            |
| 21883,   | 300664, | 2555.9352, | 21921,   | 296084, | 2553.5820, | 21959,   | 301488, | 2551.2287, |
| 6.387379 |         |            | 6.381498 |         |            | 6.375617 |         |            |
| 21884,   | 301440, | 2555.8733, | 21922,   | 296138, | 2553.5200, | 21960,   | 301292, | 2551.1668, |
| 6.387224 |         |            | 6.381343 |         |            | 6.375462 |         |            |
| 21885,   | 301708, | 2555.8113, | 21923,   | 296618, | 2553.4581, | 21961,   | 300536, | 2551.1049, |
| 6.387069 |         |            | 6.381189 |         |            | 6.375308 |         |            |
| 21886,   | 301504, | 2555.7494, | 21924,   | 297718, | 2553.3962, | 21962,   | 299736, | 2551.0430, |
| 6.386915 |         |            | 6.381034 |         |            | 6.375153 |         |            |
| 21887,   | 301128, | 2555.6875, | 21925,   | 299268, | 2553.3343, | 21963,   | 299326, | 2550.9810, |
| 6.386760 |         |            | 6.380879 |         |            | 6.374998 |         |            |
| 21888,   | 300740, | 2555.6256, | 21926,   | 300674, | 2553.2723, | 21964,   | 299246, | 2550.9191, |
| 6.386605 |         |            | 6.380724 |         |            | 6.374843 |         |            |
| 21889,   | 300272, | 2555.5636, | 21927,   | 301336, | 2553.2104, | 21965,   | 299112, | 2550.8572, |
| 6.386450 |         |            | 6.380570 |         |            | 6.374689 |         |            |
| 21890,   | 299658, | 2555.5017, | 21928,   | 301210, | 2553.1485, | 21966,   | 298752, | 2550.7953, |
| 6.386296 |         |            | 6.380415 |         |            | 6.374534 |         |            |
| 21891,   | 299078, | 2555.4398, | 21929,   | 300848, | 2553.0866, | 21967,   | 298518, | 2550.7333, |
| 6.386141 |         |            | 6.380260 |         |            | 6.374379 |         |            |
| 21892,   | 298810, | 2555.3778, | 21930,   | 300832, | 2553.0246, | 21968,   | 298944, | 2550.6714, |
| 6.385986 |         |            | 6.380105 |         |            | 6.374224 |         |            |
| 21893,   | 298892, | 2555.3159, | 21931,   | 301140, | 2552.9627, | 21969,   | 300138, | 2550.6095, |
| 6.385831 |         |            | 6.379950 |         |            | 6.374070 |         |            |
| 21894,   | 299006, | 2555.2540, | 21932,   | 301204, | 2552.9008, | 21970,   | 301588, | 2550.5476, |
| 6.385677 |         |            | 6.379796 |         |            | 6.373915 |         |            |
| 21895,   | 298782, | 2555.1921, | 21933,   | 300598, | 2552.8388, | 21971,   | 302590, | 2550.4856, |
| 6.385522 |         |            | 6.379641 |         |            | 6.373760 |         |            |
| 21896,   | 298224, | 2555.1301, | 21934,   | 299586, | 2552.7769, | 21972,   | 302866, | 2550.4237, |
| 6.385367 |         |            | 6.379486 |         |            | 6.373605 |         |            |

|          |         |            |          |         |            |          |         |            |
|----------|---------|------------|----------|---------|------------|----------|---------|------------|
| 21973,   | 302690, | 2550.3618, | 22011,   | 303244, | 2548.0085, | 22049,   | 304618, | 2545.6553, |
| 6.373451 |         |            | 6.367570 |         |            | 6.361689 |         |            |
| 21974,   | 302508, | 2550.2998, | 22012,   | 303100, | 2547.9466, | 22050,   | 304890, | 2545.5934, |
| 6.373296 |         |            | 6.367415 |         |            | 6.361534 |         |            |
| 21975,   | 302456, | 2550.2379, | 22013,   | 303368, | 2547.8847, | 22051,   | 305598, | 2545.5315, |
| 6.373141 |         |            | 6.367260 |         |            | 6.361380 |         |            |
| 21976,   | 302358, | 2550.1760, | 22014,   | 303568, | 2547.8228, | 22052,   | 306198, | 2545.4695, |
| 6.372986 |         |            | 6.367106 |         |            | 6.361225 |         |            |
| 21977,   | 302048, | 2550.1141, | 22015,   | 303536, | 2547.7608, | 22053,   | 306318, | 2545.4076, |
| 6.372832 |         |            | 6.366951 |         |            | 6.361070 |         |            |
| 21978,   | 301652, | 2550.0521, | 22016,   | 303548, | 2547.6989, | 22054,   | 305992, | 2545.3457, |
| 6.372677 |         |            | 6.366796 |         |            | 6.360915 |         |            |
| 21979,   | 301426, | 2549.9902, | 22017,   | 303872, | 2547.6370, | 22055,   | 305458, | 2545.2838, |
| 6.372522 |         |            | 6.366641 |         |            | 6.360761 |         |            |
| 21980,   | 301480, | 2549.9283, | 22018,   | 304332, | 2547.5751, | 22056,   | 304816, | 2545.2218, |
| 6.372367 |         |            | 6.366487 |         |            | 6.360606 |         |            |
| 21981,   | 301682, | 2549.8664, | 22019,   | 304428, | 2547.5131, | 22057,   | 303986, | 2545.1599, |
| 6.372213 |         |            | 6.366332 |         |            | 6.360451 |         |            |
| 21982,   | 301898, | 2549.8044, | 22020,   | 303948, | 2547.4512, | 22058,   | 302954, | 2545.0980, |
| 6.372058 |         |            | 6.366177 |         |            | 6.360296 |         |            |
| 21983,   | 302178, | 2549.7425, | 22021,   | 303246, | 2547.3893, | 22059,   | 301956, | 2545.0361, |
| 6.371903 |         |            | 6.366022 |         |            | 6.360141 |         |            |
| 21984,   | 302658, | 2549.6806, | 22022,   | 302950, | 2547.3274, | 22060,   | 301250, | 2544.9741, |
| 6.371748 |         |            | 6.365868 |         |            | 6.359987 |         |            |
| 21985,   | 303320, | 2549.6186, | 22023,   | 303276, | 2547.2654, | 22061,   | 300838, | 2544.9122, |
| 6.371594 |         |            | 6.365713 |         |            | 6.359832 |         |            |
| 21986,   | 303918, | 2549.5567, | 22024,   | 303808, | 2547.2035, | 22062,   | 300464, | 2544.8503, |
| 6.371439 |         |            | 6.365558 |         |            | 6.359677 |         |            |
| 21987,   | 304244, | 2549.4948, | 22025,   | 303944, | 2547.1416, | 22063,   | 299958, | 2544.7883, |
| 6.371284 |         |            | 6.365403 |         |            | 6.359522 |         |            |
| 21988,   | 304362, | 2549.4329, | 22026,   | 303536, | 2547.0796, | 22064,   | 299560, | 2544.7264, |
| 6.371129 |         |            | 6.365248 |         |            | 6.359368 |         |            |
| 21989,   | 304538, | 2549.3709, | 22027,   | 302982, | 2547.0177, | 22065,   | 299716, | 2544.6645, |
| 6.370975 |         |            | 6.365094 |         |            | 6.359213 |         |            |
| 21990,   | 304878, | 2549.3090, | 22028,   | 302732, | 2546.9558, | 22066,   | 300586, | 2544.6026, |
| 6.370820 |         |            | 6.364939 |         |            | 6.359058 |         |            |
| 21991,   | 305132, | 2549.2471, | 22029,   | 302808, | 2546.8939, | 22067,   | 301760, | 2544.5406, |
| 6.370665 |         |            | 6.364784 |         |            | 6.358903 |         |            |
| 21992,   | 304944, | 2549.1852, | 22030,   | 302874, | 2546.8319, | 22068,   | 302572, | 2544.4787, |
| 6.370510 |         |            | 6.364629 |         |            | 6.358749 |         |            |
| 21993,   | 304302, | 2549.1232, | 22031,   | 302734, | 2546.7700, | 22069,   | 302676, | 2544.4168, |
| 6.370355 |         |            | 6.364475 |         |            | 6.358594 |         |            |
| 21994,   | 303618, | 2549.0613, | 22032,   | 302628, | 2546.7081, | 22070,   | 302344, | 2544.3549, |
| 6.370201 |         |            | 6.364320 |         |            | 6.358439 |         |            |
| 21995,   | 303348, | 2548.9994, | 22033,   | 302934, | 2546.6462, | 22071,   | 302094, | 2544.2929, |
| 6.370046 |         |            | 6.364165 |         |            | 6.358284 |         |            |
| 21996,   | 303532, | 2548.9375, | 22034,   | 303654, | 2546.5842, | 22072,   | 302178, | 2544.2310, |
| 6.369891 |         |            | 6.364010 |         |            | 6.358130 |         |            |
| 21997,   | 303796, | 2548.8755, | 22035,   | 304288, | 2546.5223, | 22073,   | 302398, | 2544.1691, |
| 6.369736 |         |            | 6.363856 |         |            | 6.357975 |         |            |
| 21998,   | 303782, | 2548.8136, | 22036,   | 304344, | 2546.4604, | 22074,   | 302466, | 2544.1072, |
| 6.369582 |         |            | 6.363701 |         |            | 6.357820 |         |            |
| 21999,   | 303524, | 2548.7517, | 22037,   | 303848, | 2546.3984, | 22075,   | 302394, | 2544.0452, |
| 6.369427 |         |            | 6.363546 |         |            | 6.357665 |         |            |
| 22000,   | 303354, | 2548.6897, | 22038,   | 303330, | 2546.3365, | 22076,   | 302462, | 2543.9833, |
| 6.369272 |         |            | 6.363391 |         |            | 6.357511 |         |            |
| 22001,   | 303442, | 2548.6278, | 22039,   | 303296, | 2546.2746, | 22077,   | 302864, | 2543.9214, |
| 6.369117 |         |            | 6.363237 |         |            | 6.357356 |         |            |
| 22002,   | 303584, | 2548.5659, | 22040,   | 303734, | 2546.2127, | 22078,   | 303414, | 2543.8594, |
| 6.368963 |         |            | 6.363082 |         |            | 6.357201 |         |            |
| 22003,   | 303516, | 2548.5040, | 22041,   | 304268, | 2546.1507, | 22079,   | 303762, | 2543.7975, |
| 6.368808 |         |            | 6.362927 |         |            | 6.357046 |         |            |
| 22004,   | 303316, | 2548.4420, | 22042,   | 304624, | 2546.0888, | 22080,   | 303778, | 2543.7356, |
| 6.368653 |         |            | 6.362772 |         |            | 6.356892 |         |            |
| 22005,   | 303402, | 2548.3801, | 22043,   | 304894, | 2546.0269, | 22081,   | 303722, | 2543.6737, |
| 6.368498 |         |            | 6.362618 |         |            | 6.356737 |         |            |
| 22006,   | 304036, | 2548.3182, | 22044,   | 305300, | 2545.9650, | 22082,   | 303948, | 2543.6117, |
| 6.368344 |         |            | 6.362463 |         |            | 6.356582 |         |            |
| 22007,   | 304908, | 2548.2563, | 22045,   | 305780, | 2545.9030, | 22083,   | 304548, | 2543.5498, |
| 6.368189 |         |            | 6.362308 |         |            | 6.356427 |         |            |
| 22008,   | 305338, | 2548.1943, | 22046,   | 305972, | 2545.8411, | 22084,   | 305286, | 2543.4879, |
| 6.368034 |         |            | 6.362153 |         |            | 6.356273 |         |            |
| 22009,   | 304930, | 2548.1324, | 22047,   | 305628, | 2545.7792, | 22085,   | 305870, | 2543.4260, |
| 6.367879 |         |            | 6.361999 |         |            | 6.356118 |         |            |
| 22010,   | 303998, | 2548.0705, | 22048,   | 304984, | 2545.7173, | 22086,   | 306242, | 2543.3640, |
| 6.367725 |         |            | 6.361844 |         |            | 6.355963 |         |            |

|          |         |            |          |         |            |          |         |            |
|----------|---------|------------|----------|---------|------------|----------|---------|------------|
| 22087,   | 306512, | 2543.3021, | 22125,   | 305228, | 2540.9489, | 22163,   | 305994, | 2538.5957, |
| 6.355808 |         |            | 6.349927 |         |            | 6.344047 |         |            |
| 22088,   | 306756, | 2543.2402, | 22126,   | 305404, | 2540.8870, | 22164,   | 306524, | 2538.5337, |
| 6.355654 |         |            | 6.349773 |         |            | 6.343892 |         |            |
| 22089,   | 306908, | 2543.1782, | 22127,   | 305658, | 2540.8250, | 22165,   | 306758, | 2538.4718, |
| 6.355499 |         |            | 6.349618 |         |            | 6.343737 |         |            |
| 22090,   | 306912, | 2543.1163, | 22128,   | 305760, | 2540.7631, | 22166,   | 306240, | 2538.4099, |
| 6.355344 |         |            | 6.349463 |         |            | 6.343582 |         |            |
| 22091,   | 306838, | 2543.0544, | 22129,   | 305792, | 2540.7012, | 22167,   | 305340, | 2538.3480, |
| 6.355189 |         |            | 6.349308 |         |            | 6.343428 |         |            |
| 22092,   | 306824, | 2542.9925, | 22130,   | 305986, | 2540.6392, | 22168,   | 304884, | 2538.2860, |
| 6.355034 |         |            | 6.349154 |         |            | 6.343273 |         |            |
| 22093,   | 306830, | 2542.9305, | 22131,   | 306352, | 2540.5773, | 22169,   | 305324, | 2538.2241, |
| 6.354880 |         |            | 6.348999 |         |            | 6.343118 |         |            |
| 22094,   | 306642, | 2542.8686, | 22132,   | 306518, | 2540.5154, | 22170,   | 306268, | 2538.1622, |
| 6.354725 |         |            | 6.348844 |         |            | 6.342963 |         |            |
| 22095,   | 306100, | 2542.8067, | 22133,   | 306170, | 2540.4535, | 22171,   | 306882, | 2538.1002, |
| 6.354570 |         |            | 6.348689 |         |            | 6.342809 |         |            |
| 22096,   | 305388, | 2542.7448, | 22134,   | 305462, | 2540.3915, | 22172,   | 306698, | 2538.0383, |
| 6.354415 |         |            | 6.348535 |         |            | 6.342654 |         |            |
| 22097,   | 304900, | 2542.6828, | 22135,   | 304996, | 2540.3296, | 22173,   | 305962, | 2537.9764, |
| 6.354261 |         |            | 6.348380 |         |            | 6.342499 |         |            |
| 22098,   | 304836, | 2542.6209, | 22136,   | 305222, | 2540.2677, | 22174,   | 305258, | 2537.9145, |
| 6.354106 |         |            | 6.348225 |         |            | 6.342344 |         |            |
| 22099,   | 304980, | 2542.5590, | 22137,   | 305998, | 2540.2058, | 22175,   | 304848, | 2537.8525, |
| 6.353951 |         |            | 6.348070 |         |            | 6.342190 |         |            |
| 22100,   | 304932, | 2542.4971, | 22138,   | 306738, | 2540.1438, | 22176,   | 304572, | 2537.7906, |
| 6.353796 |         |            | 6.347916 |         |            | 6.342035 |         |            |
| 22101,   | 304578, | 2542.4351, | 22139,   | 307074, | 2540.0819, | 22177,   | 304262, | 2537.7287, |
| 6.353642 |         |            | 6.347761 |         |            | 6.341880 |         |            |
| 22102,   | 304246, | 2542.3732, | 22140,   | 307200, | 2540.0200, | 22178,   | 304128, | 2537.6668, |
| 6.353487 |         |            | 6.347606 |         |            | 6.341725 |         |            |
| 22103,   | 304316, | 2542.3113, | 22141,   | 307550, | 2539.9581, | 22179,   | 304580, | 2537.6048, |
| 6.353332 |         |            | 6.347451 |         |            | 6.341571 |         |            |
| 22104,   | 304708, | 2542.2493, | 22142,   | 308214, | 2539.8961, | 22180,   | 305682, | 2537.5429, |
| 6.353177 |         |            | 6.347297 |         |            | 6.341416 |         |            |
| 22105,   | 304886, | 2542.1874, | 22143,   | 308720, | 2539.8342, | 22181,   | 306978, | 2537.4810, |
| 6.353023 |         |            | 6.347142 |         |            | 6.341261 |         |            |
| 22106,   | 304446, | 2542.1255, | 22144,   | 308558, | 2539.7723, | 22182,   | 307800, | 2537.4190, |
| 6.352868 |         |            | 6.346987 |         |            | 6.341106 |         |            |
| 22107,   | 303618, | 2542.0636, | 22145,   | 307800, | 2539.7103, | 22183,   | 307900, | 2537.3571, |
| 6.352713 |         |            | 6.346832 |         |            | 6.340952 |         |            |
| 22108,   | 303150, | 2542.0016, | 22146,   | 307056, | 2539.6484, | 22184,   | 307586, | 2537.2952, |
| 6.352558 |         |            | 6.346678 |         |            | 6.340797 |         |            |
| 22109,   | 303566, | 2541.9397, | 22147,   | 306896, | 2539.5865, | 22185,   | 307310, | 2537.2333, |
| 6.352404 |         |            | 6.346523 |         |            | 6.340642 |         |            |
| 22110,   | 304638, | 2541.8778, | 22148,   | 307292, | 2539.5246, | 22186,   | 307202, | 2537.1713, |
| 6.352249 |         |            | 6.346368 |         |            | 6.340487 |         |            |
| 22111,   | 305582, | 2541.8159, | 22149,   | 307738, | 2539.4626, | 22187,   | 307068, | 2537.1094, |
| 6.352094 |         |            | 6.346213 |         |            | 6.340333 |         |            |
| 22112,   | 305820, | 2541.7539, | 22150,   | 307882, | 2539.4007, | 22188,   | 306784, | 2537.0475, |
| 6.351939 |         |            | 6.346059 |         |            | 6.340178 |         |            |
| 22113,   | 305452, | 2541.6920, | 22151,   | 307930, | 2539.3388, | 22189,   | 306514, | 2536.9856, |
| 6.351785 |         |            | 6.345904 |         |            | 6.340023 |         |            |
| 22114,   | 305016, | 2541.6301, | 22152,   | 308374, | 2539.2769, | 22190,   | 306522, | 2536.9236, |
| 6.351630 |         |            | 6.345749 |         |            | 6.339868 |         |            |
| 22115,   | 304870, | 2541.5681, | 22153,   | 309376, | 2539.2149, | 22191,   | 306824, | 2536.8617, |
| 6.351475 |         |            | 6.345594 |         |            | 6.339713 |         |            |
| 22116,   | 304878, | 2541.5062, | 22154,   | 310536, | 2539.1530, | 22192,   | 307144, | 2536.7998, |
| 6.351320 |         |            | 6.345440 |         |            | 6.339559 |         |            |
| 22117,   | 304750, | 2541.4443, | 22155,   | 311284, | 2539.0911, | 22193,   | 307296, | 2536.7379, |
| 6.351166 |         |            | 6.345285 |         |            | 6.339404 |         |            |
| 22118,   | 304484, | 2541.3824, | 22156,   | 311386, | 2539.0291, | 22194,   | 307416, | 2536.6759, |
| 6.351011 |         |            | 6.345130 |         |            | 6.339249 |         |            |
| 22119,   | 304420, | 2541.3204, | 22157,   | 310992, | 2538.9672, | 22195,   | 307788, | 2536.6140, |
| 6.350856 |         |            | 6.344975 |         |            | 6.339094 |         |            |
| 22120,   | 304790, | 2541.2585, | 22158,   | 310320, | 2538.9053, | 22196,   | 308358, | 2536.5521, |
| 6.350701 |         |            | 6.344820 |         |            | 6.338940 |         |            |
| 22121,   | 305394, | 2541.1966, | 22159,   | 309362, | 2538.8434, | 22197,   | 308642, | 2536.4901, |
| 6.350547 |         |            | 6.344666 |         |            | 6.338785 |         |            |
| 22122,   | 305764, | 2541.1347, | 22160,   | 308076, | 2538.7814, | 22198,   | 308156, | 2536.4282, |
| 6.350392 |         |            | 6.344511 |         |            | 6.338630 |         |            |
| 22123,   | 305676, | 2541.0727, | 22161,   | 306752, | 2538.7195, | 22199,   | 307006, | 2536.3663, |
| 6.350237 |         |            | 6.344356 |         |            | 6.338475 |         |            |
| 22124,   | 305360, | 2541.0108, | 22162,   | 305952, | 2538.6576, | 22200,   | 305882, | 2536.3044, |
| 6.350082 |         |            | 6.344201 |         |            | 6.338321 |         |            |

|          |         |            |          |         |            |          |         |            |
|----------|---------|------------|----------|---------|------------|----------|---------|------------|
| 22201,   | 305448, | 2536.2424, | 22239,   | 307844, | 2533.8892, | 22277,   | 308090, | 2531.5360, |
| 6.338166 |         |            | 6.332285 |         |            | 6.326404 |         |            |
| 22202,   | 305728, | 2536.1805, | 22240,   | 307826, | 2533.8273, | 22278,   | 308456, | 2531.4741, |
| 6.338011 |         |            | 6.332130 |         |            | 6.326250 |         |            |
| 22203,   | 306170, | 2536.1186, | 22241,   | 307842, | 2533.7654, | 22279,   | 308946, | 2531.4121, |
| 6.337856 |         |            | 6.331976 |         |            | 6.326095 |         |            |
| 22204,   | 306316, | 2536.0567, | 22242,   | 307690, | 2533.7034, | 22280,   | 309294, | 2531.3502, |
| 6.337702 |         |            | 6.331821 |         |            | 6.325940 |         |            |
| 22205,   | 306292, | 2535.9947, | 22243,   | 307568, | 2533.6415, | 22281,   | 309576, | 2531.2883, |
| 6.337547 |         |            | 6.331666 |         |            | 6.325785 |         |            |
| 22206,   | 306582, | 2535.9328, | 22244,   | 307822, | 2533.5796, | 22282,   | 310020, | 2531.2264, |
| 6.337392 |         |            | 6.331511 |         |            | 6.325631 |         |            |
| 22207,   | 307396, | 2535.8709, | 22245,   | 308470, | 2533.5177, | 22283,   | 310618, | 2531.1644, |
| 6.337237 |         |            | 6.331357 |         |            | 6.325476 |         |            |
| 22208,   | 308358, | 2535.8089, | 22246,   | 309112, | 2533.4557, | 22284,   | 311022, | 2531.1025, |
| 6.337083 |         |            | 6.331202 |         |            | 6.325321 |         |            |
| 22209,   | 308904, | 2535.7470, | 22247,   | 309370, | 2533.3938, | 22285,   | 310884, | 2531.0406, |
| 6.336928 |         |            | 6.331047 |         |            | 6.325166 |         |            |
| 22210,   | 308922, | 2535.6851, | 22248,   | 309356, | 2533.3319, | 22286,   | 310194, | 2530.9786, |
| 6.336773 |         |            | 6.330892 |         |            | 6.325011 |         |            |
| 22211,   | 308852, | 2535.6232, | 22249,   | 309522, | 2533.2699, | 22287,   | 309286, | 2530.9167, |
| 6.336618 |         |            | 6.330738 |         |            | 6.324857 |         |            |
| 22212,   | 309194, | 2535.5612, | 22250,   | 310096, | 2533.2080, | 22288,   | 308458, | 2530.8548, |
| 6.336464 |         |            | 6.330583 |         |            | 6.324702 |         |            |
| 22213,   | 309882, | 2535.4993, | 22251,   | 310732, | 2533.1461, | 22289,   | 307766, | 2530.7929, |
| 6.336309 |         |            | 6.330428 |         |            | 6.324547 |         |            |
| 22214,   | 310386, | 2535.4374, | 22252,   | 310808, | 2533.0842, | 22290,   | 307148, | 2530.7309, |
| 6.336154 |         |            | 6.330273 |         |            | 6.324392 |         |            |
| 22215,   | 310264, | 2535.3755, | 22253,   | 310148, | 2533.0222, | 22291,   | 306744, | 2530.6690, |
| 6.335999 |         |            | 6.330118 |         |            | 6.324238 |         |            |
| 22216,   | 309646, | 2535.3135, | 22254,   | 309274, | 2532.9603, | 22292,   | 306870, | 2530.6071, |
| 6.335845 |         |            | 6.329964 |         |            | 6.324083 |         |            |
| 22217,   | 309048, | 2535.2516, | 22255,   | 308904, | 2532.8984, | 22293,   | 307612, | 2530.5452, |
| 6.335690 |         |            | 6.329809 |         |            | 6.323928 |         |            |
| 22218,   | 308790, | 2535.1897, | 22256,   | 309192, | 2532.8365, | 22294,   | 308584, | 2530.4832, |
| 6.335535 |         |            | 6.329654 |         |            | 6.323773 |         |            |
| 22219,   | 308718, | 2535.1278, | 22257,   | 309580, | 2532.7745, | 22295,   | 309160, | 2530.4213, |
| 6.335380 |         |            | 6.329499 |         |            | 6.323619 |         |            |
| 22220,   | 308498, | 2535.0658, | 22258,   | 309388, | 2532.7126, | 22296,   | 309088, | 2530.3594, |
| 6.335226 |         |            | 6.329345 |         |            | 6.323464 |         |            |
| 22221,   | 308088, | 2535.0039, | 22259,   | 308594, | 2532.6507, | 22297,   | 308784, | 2530.2975, |
| 6.335071 |         |            | 6.329190 |         |            | 6.323309 |         |            |
| 22222,   | 307810, | 2534.9420, | 22260,   | 307840, | 2532.5887, | 22298,   | 308912, | 2530.2355, |
| 6.334916 |         |            | 6.329035 |         |            | 6.323154 |         |            |
| 22223,   | 307942, | 2534.8800, | 22261,   | 307810, | 2532.5268, | 22299,   | 309706, | 2530.1736, |
| 6.334761 |         |            | 6.328880 |         |            | 6.323000 |         |            |
| 22224,   | 308360, | 2534.8181, | 22262,   | 308546, | 2532.4649, | 22300,   | 310696, | 2530.1117, |
| 6.334606 |         |            | 6.328726 |         |            | 6.322845 |         |            |
| 22225,   | 308692, | 2534.7562, | 22263,   | 309520, | 2532.4030, | 22301,   | 311200, | 2530.0497, |
| 6.334452 |         |            | 6.328571 |         |            | 6.322690 |         |            |
| 22226,   | 308784, | 2534.6943, | 22264,   | 310216, | 2532.3410, | 22302,   | 311026, | 2529.9878, |
| 6.334297 |         |            | 6.328416 |         |            | 6.322535 |         |            |
| 22227,   | 308880, | 2534.6323, | 22265,   | 310604, | 2532.2791, | 22303,   | 310618, | 2529.9259, |
| 6.334142 |         |            | 6.328261 |         |            | 6.322381 |         |            |
| 22228,   | 309330, | 2534.5704, | 22266,   | 311002, | 2532.2172, | 22304,   | 310562, | 2529.8640, |
| 6.333987 |         |            | 6.328107 |         |            | 6.322226 |         |            |
| 22229,   | 310100, | 2534.5085, | 22267,   | 311572, | 2532.1553, | 22305,   | 310952, | 2529.8020, |
| 6.333833 |         |            | 6.327952 |         |            | 6.322071 |         |            |
| 22230,   | 310760, | 2534.4466, | 22268,   | 312096, | 2532.0933, | 22306,   | 311384, | 2529.7401, |
| 6.333678 |         |            | 6.327797 |         |            | 6.321916 |         |            |
| 22231,   | 310918, | 2534.3846, | 22269,   | 312244, | 2532.0314, | 22307,   | 311482, | 2529.6782, |
| 6.333523 |         |            | 6.327642 |         |            | 6.321762 |         |            |
| 22232,   | 310650, | 2534.3227, | 22270,   | 311966, | 2531.9695, | 22308,   | 311320, | 2529.6163, |
| 6.333368 |         |            | 6.327488 |         |            | 6.321607 |         |            |
| 22233,   | 310342, | 2534.2608, | 22271,   | 311490, | 2531.9076, | 22309,   | 311280, | 2529.5543, |
| 6.333214 |         |            | 6.327333 |         |            | 6.321452 |         |            |
| 22234,   | 310258, | 2534.1988, | 22272,   | 311018, | 2531.8456, | 22310,   | 311556, | 2529.4924, |
| 6.333059 |         |            | 6.327178 |         |            | 6.321297 |         |            |
| 22235,   | 310194, | 2534.1369, | 22273,   | 310494, | 2531.7837, | 22311,   | 311916, | 2529.4305, |
| 6.332904 |         |            | 6.327023 |         |            | 6.321143 |         |            |
| 22236,   | 309794, | 2534.0750, | 22274,   | 309754, | 2531.7218, | 22312,   | 312060, | 2529.3685, |
| 6.332749 |         |            | 6.326869 |         |            | 6.320988 |         |            |
| 22237,   | 309024, | 2534.0131, | 22275,   | 308870, | 2531.6598, | 22313,   | 312026, | 2529.3066, |
| 6.332595 |         |            | 6.326714 |         |            | 6.320833 |         |            |
| 22238,   | 308242, | 2533.9511, | 22276,   | 308208, | 2531.5979, | 22314,   | 312204, | 2529.2447, |
| 6.332440 |         |            | 6.326559 |         |            | 6.320678 |         |            |

|          |         |            |          |         |            |          |         |            |
|----------|---------|------------|----------|---------|------------|----------|---------|------------|
| 22315,   | 312888, | 2529.1828, | 22353,   | 311070, | 2526.8295, | 22391,   | 311140, | 2524.4763, |
| 6.320524 |         |            | 6.314643 |         |            | 6.308762 |         |            |
| 22316,   | 313880, | 2529.1208, | 22354,   | 311854, | 2526.7676, | 22392,   | 311630, | 2524.4144, |
| 6.320369 |         |            | 6.314488 |         |            | 6.308607 |         |            |
| 22317,   | 314674, | 2529.0589, | 22355,   | 312394, | 2526.7057, | 22393,   | 311964, | 2524.3525, |
| 6.320214 |         |            | 6.314333 |         |            | 6.308452 |         |            |
| 22318,   | 314972, | 2528.9970, | 22356,   | 312320, | 2526.6438, | 22394,   | 311948, | 2524.2905, |
| 6.320059 |         |            | 6.314178 |         |            | 6.308298 |         |            |
| 22319,   | 314960, | 2528.9351, | 22357,   | 311880, | 2526.5818, | 22395,   | 311840, | 2524.2286, |
| 6.319904 |         |            | 6.314024 |         |            | 6.308143 |         |            |
| 22320,   | 314980, | 2528.8731, | 22358,   | 311654, | 2526.5199, | 22396,   | 312048, | 2524.1667, |
| 6.319750 |         |            | 6.313869 |         |            | 6.307988 |         |            |
| 22321,   | 315078, | 2528.8112, | 22359,   | 311914, | 2526.4580, | 22397,   | 312686, | 2524.1048, |
| 6.319595 |         |            | 6.313714 |         |            | 6.307833 |         |            |
| 22322,   | 314960, | 2528.7493, | 22360,   | 312370, | 2526.3961, | 22398,   | 313460, | 2524.0428, |
| 6.319440 |         |            | 6.313559 |         |            | 6.307679 |         |            |
| 22323,   | 314426, | 2528.6874, | 22361,   | 312542, | 2526.3341, | 22399,   | 314012, | 2523.9809, |
| 6.319285 |         |            | 6.313405 |         |            | 6.307524 |         |            |
| 22324,   | 313748, | 2528.6254, | 22362,   | 312326, | 2526.2722, | 22400,   | 314252, | 2523.9190, |
| 6.319131 |         |            | 6.313250 |         |            | 6.307369 |         |            |
| 22325,   | 313468, | 2528.5635, | 22363,   | 312076, | 2526.2103, | 22401,   | 314394, | 2523.8571, |
| 6.318976 |         |            | 6.313095 |         |            | 6.307214 |         |            |
| 22326,   | 313800, | 2528.5016, | 22364,   | 312152, | 2526.1484, | 22402,   | 314620, | 2523.7951, |
| 6.318821 |         |            | 6.312940 |         |            | 6.307060 |         |            |
| 22327,   | 314346, | 2528.4396, | 22365,   | 312478, | 2526.0864, | 22403,   | 314892, | 2523.7332, |
| 6.318666 |         |            | 6.312786 |         |            | 6.306905 |         |            |
| 22328,   | 314484, | 2528.3777, | 22366,   | 312614, | 2526.0245, | 22404,   | 315052, | 2523.6713, |
| 6.318512 |         |            | 6.312631 |         |            | 6.306750 |         |            |
| 22329,   | 314010, | 2528.3158, | 22367,   | 312284, | 2525.9626, | 22405,   | 315086, | 2523.6093, |
| 6.318357 |         |            | 6.312476 |         |            | 6.306595 |         |            |
| 22330,   | 313362, | 2528.2539, | 22368,   | 311710, | 2525.9006, | 22406,   | 315158, | 2523.5474, |
| 6.318202 |         |            | 6.312321 |         |            | 6.306441 |         |            |
| 22331,   | 313130, | 2528.1919, | 22369,   | 311384, | 2525.8387, | 22407,   | 315344, | 2523.4855, |
| 6.318047 |         |            | 6.312167 |         |            | 6.306286 |         |            |
| 22332,   | 313434, | 2528.1300, | 22370,   | 311560, | 2525.7768, | 22408,   | 315508, | 2523.4236, |
| 6.317893 |         |            | 6.312012 |         |            | 6.306131 |         |            |
| 22333,   | 313832, | 2528.0681, | 22371,   | 312004, | 2525.7149, | 22409,   | 315410, | 2523.3616, |
| 6.317738 |         |            | 6.311857 |         |            | 6.305976 |         |            |
| 22334,   | 313860, | 2528.0062, | 22372,   | 312276, | 2525.6529, | 22410,   | 315082, | 2523.2997, |
| 6.317583 |         |            | 6.311702 |         |            | 6.305822 |         |            |
| 22335,   | 313530, | 2527.9442, | 22373,   | 312202, | 2525.5910, | 22411,   | 314892, | 2523.2378, |
| 6.317428 |         |            | 6.311548 |         |            | 6.305667 |         |            |
| 22336,   | 313246, | 2527.8823, | 22374,   | 311976, | 2525.5291, | 22412,   | 315242, | 2523.1759, |
| 6.317274 |         |            | 6.311393 |         |            | 6.305512 |         |            |
| 22337,   | 313280, | 2527.8204, | 22375,   | 311916, | 2525.4672, | 22413,   | 316100, | 2523.1139, |
| 6.317119 |         |            | 6.311238 |         |            | 6.305357 |         |            |
| 22338,   | 313450, | 2527.7585, | 22376,   | 312130, | 2525.4052, | 22414,   | 316958, | 2523.0520, |
| 6.316964 |         |            | 6.311083 |         |            | 6.305203 |         |            |
| 22339,   | 313386, | 2527.6965, | 22377,   | 312482, | 2525.3433, | 22415,   | 317242, | 2522.9901, |
| 6.316809 |         |            | 6.310929 |         |            | 6.305048 |         |            |
| 22340,   | 312994, | 2527.6346, | 22378,   | 312802, | 2525.2814, | 22416,   | 316814, | 2522.9282, |
| 6.316655 |         |            | 6.310774 |         |            | 6.304893 |         |            |
| 22341,   | 312620, | 2527.5727, | 22379,   | 313028, | 2525.2194, | 22417,   | 316074, | 2522.8662, |
| 6.316500 |         |            | 6.310619 |         |            | 6.304738 |         |            |
| 22342,   | 312570, | 2527.5107, | 22380,   | 313118, | 2525.1575, | 22418,   | 315544, | 2522.8043, |
| 6.316345 |         |            | 6.310464 |         |            | 6.304583 |         |            |
| 22343,   | 312730, | 2527.4488, | 22381,   | 312992, | 2525.0956, | 22419,   | 315446, | 2522.7424, |
| 6.316190 |         |            | 6.310310 |         |            | 6.304429 |         |            |
| 22344,   | 312646, | 2527.3869, | 22382,   | 312592, | 2525.0337, | 22420,   | 315606, | 2522.6804, |
| 6.316036 |         |            | 6.310155 |         |            | 6.304274 |         |            |
| 22345,   | 312072, | 2527.3250, | 22383,   | 312064, | 2524.9717, | 22421,   | 315752, | 2522.6185, |
| 6.315881 |         |            | 6.310000 |         |            | 6.304119 |         |            |
| 22346,   | 311290, | 2527.2630, | 22384,   | 311720, | 2524.9098, | 22422,   | 315750, | 2522.5566, |
| 6.315726 |         |            | 6.309845 |         |            | 6.303964 |         |            |
| 22347,   | 310826, | 2527.2011, | 22385,   | 311774, | 2524.8479, | 22423,   | 315634, | 2522.4947, |
| 6.315571 |         |            | 6.309690 |         |            | 6.303810 |         |            |
| 22348,   | 310884, | 2527.1392, | 22386,   | 312070, | 2524.7860, | 22424,   | 315438, | 2522.4327, |
| 6.315417 |         |            | 6.309536 |         |            | 6.303655 |         |            |
| 22349,   | 311114, | 2527.0773, | 22387,   | 312178, | 2524.7240, | 22425,   | 315118, | 2522.3708, |
| 6.315262 |         |            | 6.309381 |         |            | 6.303500 |         |            |
| 22350,   | 311082, | 2527.0153, | 22388,   | 311854, | 2524.6621, | 22426,   | 314692, | 2522.3089, |
| 6.315107 |         |            | 6.309226 |         |            | 6.303345 |         |            |
| 22351,   | 310770, | 2526.9534, | 22389,   | 311282, | 2524.6002, | 22427,   | 314322, | 2522.2470, |
| 6.314952 |         |            | 6.309071 |         |            | 6.303191 |         |            |
| 22352,   | 310644, | 2526.8915, | 22390,   | 310952, | 2524.5383, | 22428,   | 314224, | 2522.1850, |
| 6.314797 |         |            | 6.308917 |         |            | 6.303036 |         |            |



|          |         |            |          |         |            |          |         |            |
|----------|---------|------------|----------|---------|------------|----------|---------|------------|
| 22429,   | 314480, | 2522.1231, | 22467,   | 313512, | 2519.7699, | 22505,   | 320916, | 2517.4167, |
| 6.302881 |         |            | 6.297000 |         |            | 6.291120 |         |            |
| 22430,   | 314954, | 2522.0612, | 22468,   | 314110, | 2519.7080, | 22506,   | 321754, | 2517.3547, |
| 6.302726 |         |            | 6.296846 |         |            | 6.290965 |         |            |
| 22431,   | 315436, | 2521.9992, | 22469,   | 314296, | 2519.6460, | 22507,   | 321938, | 2517.2928, |
| 6.302572 |         |            | 6.296691 |         |            | 6.290810 |         |            |
| 22432,   | 315814, | 2521.9373, | 22470,   | 314254, | 2519.5841, | 22508,   | 321410, | 2517.2309, |
| 6.302417 |         |            | 6.296536 |         |            | 6.290655 |         |            |
| 22433,   | 316106, | 2521.8754, | 22471,   | 314518, | 2519.5222, | 22509,   | 320582, | 2517.1689, |
| 6.302262 |         |            | 6.296381 |         |            | 6.290501 |         |            |
| 22434,   | 316292, | 2521.8135, | 22472,   | 315352, | 2519.4602, | 22510,   | 319866, | 2517.1070, |
| 6.302107 |         |            | 6.296227 |         |            | 6.290346 |         |            |
| 22435,   | 316294, | 2521.7515, | 22473,   | 316368, | 2519.3983, | 22511,   | 319304, | 2517.0451, |
| 6.301953 |         |            | 6.296072 |         |            | 6.290191 |         |            |
| 22436,   | 316060, | 2521.6896, | 22474,   | 316880, | 2519.3364, | 22512,   | 318698, | 2516.9832, |
| 6.301798 |         |            | 6.295917 |         |            | 6.290036 |         |            |
| 22437,   | 315714, | 2521.6277, | 22475,   | 316588, | 2519.2745, | 22513,   | 318022, | 2516.9212, |
| 6.301643 |         |            | 6.295762 |         |            | 6.289881 |         |            |
| 22438,   | 315440, | 2521.5658, | 22476,   | 315894, | 2519.2125, | 22514,   | 317570, | 2516.8593, |
| 6.301488 |         |            | 6.295608 |         |            | 6.289727 |         |            |
| 22439,   | 315250, | 2521.5038, | 22477,   | 315500, | 2519.1506, | 22515,   | 317648, | 2516.7974, |
| 6.301334 |         |            | 6.295453 |         |            | 6.289572 |         |            |
| 22440,   | 314928, | 2521.4419, | 22478,   | 315740, | 2519.0887, | 22516,   | 318244, | 2516.7355, |
| 6.301179 |         |            | 6.295298 |         |            | 6.289417 |         |            |
| 22441,   | 314262, | 2521.3800, | 22479,   | 316366, | 2519.0268, | 22517,   | 319016, | 2516.6735, |
| 6.301024 |         |            | 6.295143 |         |            | 6.289262 |         |            |
| 22442,   | 313420, | 2521.3181, | 22480,   | 316880, | 2518.9648, | 22518,   | 319630, | 2516.6116, |
| 6.300869 |         |            | 6.294989 |         |            | 6.289108 |         |            |
| 22443,   | 312962, | 2521.2561, | 22481,   | 317032, | 2518.9029, | 22519,   | 320024, | 2516.5497, |
| 6.300715 |         |            | 6.294834 |         |            | 6.288953 |         |            |
| 22444,   | 313378, | 2521.1942, | 22482,   | 316884, | 2518.8410, | 22520,   | 320280, | 2516.4878, |
| 6.300560 |         |            | 6.294679 |         |            | 6.288798 |         |            |
| 22445,   | 314582, | 2521.1323, | 22483,   | 316556, | 2518.7790, | 22521,   | 320364, | 2516.4258, |
| 6.300405 |         |            | 6.294524 |         |            | 6.288643 |         |            |
| 22446,   | 315900, | 2521.0703, | 22484,   | 316016, | 2518.7171, | 22522,   | 320092, | 2516.3639, |
| 6.300250 |         |            | 6.294369 |         |            | 6.288489 |         |            |
| 22447,   | 316632, | 2521.0084, | 22485,   | 315228, | 2518.6552, | 22523,   | 319446, | 2516.3020, |
| 6.300096 |         |            | 6.294215 |         |            | 6.288334 |         |            |
| 22448,   | 316604, | 2520.9465, | 22486,   | 314400, | 2518.5933, | 22524,   | 318798, | 2516.2400, |
| 6.299941 |         |            | 6.294060 |         |            | 6.288179 |         |            |
| 22449,   | 316248, | 2520.8846, | 22487,   | 313966, | 2518.5313, | 22525,   | 318664, | 2516.1781, |
| 6.299786 |         |            | 6.293905 |         |            | 6.288024 |         |            |
| 22450,   | 316082, | 2520.8226, | 22488,   | 314224, | 2518.4694, | 22526,   | 319184, | 2516.1162, |
| 6.299631 |         |            | 6.293750 |         |            | 6.287870 |         |            |
| 22451,   | 316226, | 2520.7607, | 22489,   | 315026, | 2518.4075, | 22527,   | 319878, | 2516.0543, |
| 6.299476 |         |            | 6.293596 |         |            | 6.287715 |         |            |
| 22452,   | 316398, | 2520.6988, | 22490,   | 315904, | 2518.3456, | 22528,   | 320036, | 2515.9923, |
| 6.299322 |         |            | 6.293441 |         |            | 6.287560 |         |            |
| 22453,   | 316352, | 2520.6369, | 22491,   | 316516, | 2518.2836, | 22529,   | 319356, | 2515.9304, |
| 6.299167 |         |            | 6.293286 |         |            | 6.287405 |         |            |
| 22454,   | 316168, | 2520.5749, | 22492,   | 316864, | 2518.2217, | 22530,   | 318212, | 2515.8685, |
| 6.299012 |         |            | 6.293131 |         |            | 6.287251 |         |            |
| 22455,   | 316096, | 2520.5130, | 22493,   | 317164, | 2518.1598, | 22531,   | 317268, | 2515.8066, |
| 6.298857 |         |            | 6.292977 |         |            | 6.287096 |         |            |
| 22456,   | 316202, | 2520.4511, | 22494,   | 317490, | 2518.0979, | 22532,   | 316870, | 2515.7446, |
| 6.298703 |         |            | 6.292822 |         |            | 6.286941 |         |            |
| 22457,   | 316264, | 2520.3891, | 22495,   | 317692, | 2518.0359, | 22533,   | 316864, | 2515.6827, |
| 6.298548 |         |            | 6.292667 |         |            | 6.286786 |         |            |
| 22458,   | 316048, | 2520.3272, | 22496,   | 317700, | 2517.9740, | 22534,   | 316936, | 2515.6208, |
| 6.298393 |         |            | 6.292512 |         |            | 6.286632 |         |            |
| 22459,   | 315628, | 2520.2653, | 22497,   | 317732, | 2517.9121, | 22535,   | 317014, | 2515.5588, |
| 6.298238 |         |            | 6.292358 |         |            | 6.286477 |         |            |
| 22460,   | 315272, | 2520.2034, | 22498,   | 318120, | 2517.8501, | 22536,   | 317256, | 2515.4969, |
| 6.298084 |         |            | 6.292203 |         |            | 6.286322 |         |            |
| 22461,   | 315088, | 2520.1414, | 22499,   | 318908, | 2517.7882, | 22537,   | 317714, | 2515.4350, |
| 6.297929 |         |            | 6.292048 |         |            | 6.286167 |         |            |
| 22462,   | 314854, | 2520.0795, | 22500,   | 319690, | 2517.7263, | 22538,   | 318094, | 2515.3731, |
| 6.297774 |         |            | 6.291893 |         |            | 6.286013 |         |            |
| 22463,   | 314282, | 2520.0176, | 22501,   | 319994, | 2517.6644, | 22539,   | 318056, | 2515.3111, |
| 6.297619 |         |            | 6.291739 |         |            | 6.285858 |         |            |
| 22464,   | 313452, | 2519.9557, | 22502,   | 319810, | 2517.6024, | 22540,   | 317564, | 2515.2492, |
| 6.297465 |         |            | 6.291584 |         |            | 6.285703 |         |            |
| 22465,   | 312856, | 2519.8937, | 22503,   | 319640, | 2517.5405, | 22541,   | 316990, | 2515.1873, |
| 6.297310 |         |            | 6.291429 |         |            | 6.285548 |         |            |
| 22466,   | 312910, | 2519.8318, | 22504,   | 320018, | 2517.4786, | 22542,   | 316722, | 2515.1254, |
| 6.297155 |         |            | 6.291274 |         |            | 6.285394 |         |            |

|          |         |            |          |         |            |          |         |            |
|----------|---------|------------|----------|---------|------------|----------|---------|------------|
| 22543,   | 316762, | 2515.0634, | 22581,   | 320280, | 2512.7102, | 22619,   | 319148, | 2510.3570, |
| 6.285239 |         |            | 6.279358 |         |            | 6.273477 |         |            |
| 22544,   | 316810, | 2515.0015, | 22582,   | 320564, | 2512.6483, | 22620,   | 319304, | 2510.2951, |
| 6.285084 |         |            | 6.279203 |         |            | 6.273322 |         |            |
| 22545,   | 316674, | 2514.9396, | 22583,   | 320490, | 2512.5864, | 22621,   | 318922, | 2510.2331, |
| 6.284929 |         |            | 6.279048 |         |            | 6.273168 |         |            |
| 22546,   | 316494, | 2514.8777, | 22584,   | 320104, | 2512.5244, | 22622,   | 318344, | 2510.1712, |
| 6.284774 |         |            | 6.278894 |         |            | 6.273013 |         |            |
| 22547,   | 316584, | 2514.8157, | 22585,   | 319800, | 2512.4625, | 22623,   | 318210, | 2510.1093, |
| 6.284620 |         |            | 6.278739 |         |            | 6.272858 |         |            |
| 22548,   | 316986, | 2514.7538, | 22586,   | 319764, | 2512.4006, | 22624,   | 318726, | 2510.0474, |
| 6.284465 |         |            | 6.278584 |         |            | 6.272703 |         |            |
| 22549,   | 317422, | 2514.6919, | 22587,   | 319750, | 2512.3387, | 22625,   | 319472, | 2509.9854, |
| 6.284310 |         |            | 6.278429 |         |            | 6.272549 |         |            |
| 22550,   | 317646, | 2514.6299, | 22588,   | 319444, | 2512.2767, | 22626,   | 319884, | 2509.9235, |
| 6.284155 |         |            | 6.278275 |         |            | 6.272394 |         |            |
| 22551,   | 317808, | 2514.5680, | 22589,   | 318934, | 2512.2148, | 22627,   | 319904, | 2509.8616, |
| 6.284001 |         |            | 6.278120 |         |            | 6.272239 |         |            |
| 22552,   | 318338, | 2514.5061, | 22590,   | 318724, | 2512.1529, | 22628,   | 320066, | 2509.7996, |
| 6.283846 |         |            | 6.277965 |         |            | 6.272084 |         |            |
| 22553,   | 319400, | 2514.4442, | 22591,   | 319202, | 2512.0909, | 22629,   | 320850, | 2509.7377, |
| 6.283691 |         |            | 6.277810 |         |            | 6.271930 |         |            |
| 22554,   | 320592, | 2514.3822, | 22592,   | 320198, | 2512.0290, | 22630,   | 322072, | 2509.6758, |
| 6.283536 |         |            | 6.277656 |         |            | 6.271775 |         |            |
| 22555,   | 321212, | 2514.3203, | 22593,   | 321140, | 2511.9671, | 22631,   | 322986, | 2509.6139, |
| 6.283382 |         |            | 6.277501 |         |            | 6.271620 |         |            |
| 22556,   | 320904, | 2514.2584, | 22594,   | 321626, | 2511.9052, | 22632,   | 322972, | 2509.5519, |
| 6.283227 |         |            | 6.277346 |         |            | 6.271465 |         |            |
| 22557,   | 319972, | 2514.1965, | 22595,   | 321780, | 2511.8432, | 22633,   | 322186, | 2509.4900, |
| 6.283072 |         |            | 6.277191 |         |            | 6.271311 |         |            |
| 22558,   | 319060, | 2514.1345, | 22596,   | 321984, | 2511.7813, | 22634,   | 321376, | 2509.4281, |
| 6.282917 |         |            | 6.277037 |         |            | 6.271156 |         |            |
| 22559,   | 318600, | 2514.0726, | 22597,   | 322340, | 2511.7194, | 22635,   | 321246, | 2509.3662, |
| 6.282763 |         |            | 6.276882 |         |            | 6.271001 |         |            |
| 22560,   | 318586, | 2514.0107, | 22598,   | 322522, | 2511.6575, | 22636,   | 321872, | 2509.3042, |
| 6.282608 |         |            | 6.276727 |         |            | 6.270846 |         |            |
| 22561,   | 318864, | 2513.9488, | 22599,   | 322174, | 2511.5955, | 22637,   | 322784, | 2509.2423, |
| 6.282453 |         |            | 6.276572 |         |            | 6.270692 |         |            |
| 22562,   | 319466, | 2513.8868, | 22600,   | 321358, | 2511.5336, | 22638,   | 323468, | 2509.1804, |
| 6.282298 |         |            | 6.276418 |         |            | 6.270537 |         |            |
| 22563,   | 320504, | 2513.8249, | 22601,   | 320530, | 2511.4717, | 22639,   | 323740, | 2509.1185, |
| 6.282144 |         |            | 6.276263 |         |            | 6.270382 |         |            |
| 22564,   | 321814, | 2513.7630, | 22602,   | 320034, | 2511.4097, | 22640,   | 323712, | 2509.0565, |
| 6.281989 |         |            | 6.276108 |         |            | 6.270227 |         |            |
| 22565,   | 322864, | 2513.7010, | 22603,   | 319754, | 2511.3478, | 22641,   | 323588, | 2508.9946, |
| 6.281834 |         |            | 6.275953 |         |            | 6.270073 |         |            |
| 22566,   | 323132, | 2513.6391, | 22604,   | 319314, | 2511.2859, | 22642,   | 323504, | 2508.9327, |
| 6.281679 |         |            | 6.275799 |         |            | 6.269918 |         |            |
| 22567,   | 322620, | 2513.5772, | 22605,   | 318588, | 2511.2240, | 22643,   | 323576, | 2508.8707, |
| 6.281525 |         |            | 6.275644 |         |            | 6.269763 |         |            |
| 22568,   | 321872, | 2513.5153, | 22606,   | 317892, | 2511.1620, | 22644,   | 323856, | 2508.8088, |
| 6.281370 |         |            | 6.275489 |         |            | 6.269608 |         |            |
| 22569,   | 321430, | 2513.4533, | 22607,   | 317670, | 2511.1001, | 22645,   | 324230, | 2508.7469, |
| 6.281215 |         |            | 6.275334 |         |            | 6.269453 |         |            |
| 22570,   | 321330, | 2513.3914, | 22608,   | 318028, | 2511.0382, | 22646,   | 324394, | 2508.6850, |
| 6.281060 |         |            | 6.275180 |         |            | 6.269299 |         |            |
| 22571,   | 321184, | 2513.3295, | 22609,   | 318668, | 2510.9763, | 22647,   | 324074, | 2508.6230, |
| 6.280906 |         |            | 6.275025 |         |            | 6.269144 |         |            |
| 22572,   | 320768, | 2513.2676, | 22610,   | 319256, | 2510.9143, | 22648,   | 323304, | 2508.5611, |
| 6.280751 |         |            | 6.274870 |         |            | 6.268989 |         |            |
| 22573,   | 320372, | 2513.2056, | 22611,   | 319752, | 2510.8524, | 22649,   | 322498, | 2508.4992, |
| 6.280596 |         |            | 6.274715 |         |            | 6.268834 |         |            |
| 22574,   | 320484, | 2513.1437, | 22612,   | 320278, | 2510.7905, | 22650,   | 322078, | 2508.4373, |
| 6.280441 |         |            | 6.274560 |         |            | 6.268680 |         |            |
| 22575,   | 321176, | 2513.0818, | 22613,   | 320766, | 2510.7286, | 22651,   | 322084, | 2508.3753, |
| 6.280287 |         |            | 6.274406 |         |            | 6.268525 |         |            |
| 22576,   | 321894, | 2513.0198, | 22614,   | 320870, | 2510.6666, | 22652,   | 322182, | 2508.3134, |
| 6.280132 |         |            | 6.274251 |         |            | 6.268370 |         |            |
| 22577,   | 321970, | 2512.9579, | 22615,   | 320348, | 2510.6047, | 22653,   | 322046, | 2508.2515, |
| 6.279977 |         |            | 6.274096 |         |            | 6.268215 |         |            |
| 22578,   | 321300, | 2512.8960, | 22616,   | 319450, | 2510.5428, | 22654,   | 321754, | 2508.1895, |
| 6.279822 |         |            | 6.273941 |         |            | 6.268061 |         |            |
| 22579,   | 320454, | 2512.8341, | 22617,   | 318792, | 2510.4808, | 22655,   | 321700, | 2508.1276, |
| 6.279667 |         |            | 6.273787 |         |            | 6.267906 |         |            |
| 22580,   | 320086, | 2512.7721, | 22618,   | 318772, | 2510.4189, | 22656,   | 322130, | 2508.0657, |
| 6.279513 |         |            | 6.273632 |         |            | 6.267751 |         |            |

|          |         |            |          |         |            |          |         |            |
|----------|---------|------------|----------|---------|------------|----------|---------|------------|
| 22657,   | 322850, | 2508.0038, | 22695,   | 324830, | 2505.6505, | 22733,   | 325636, | 2503.2973, |
| 6.267596 |         |            | 6.261716 |         |            | 6.255835 |         |            |
| 22658,   | 323382, | 2507.9418, | 22696,   | 324712, | 2505.5886, | 22734,   | 325684, | 2503.2354, |
| 6.267442 |         |            | 6.261561 |         |            | 6.255680 |         |            |
| 22659,   | 323446, | 2507.8799, | 22697,   | 324216, | 2505.5267, | 22735,   | 325392, | 2503.1735, |
| 6.267287 |         |            | 6.261406 |         |            | 6.255525 |         |            |
| 22660,   | 323212, | 2507.8180, | 22698,   | 323606, | 2505.4648, | 22736,   | 325094, | 2503.1115, |
| 6.267132 |         |            | 6.261251 |         |            | 6.255371 |         |            |
| 22661,   | 323022, | 2507.7561, | 22699,   | 323214, | 2505.4028, | 22737,   | 325162, | 2503.0496, |
| 6.266977 |         |            | 6.261097 |         |            | 6.255216 |         |            |
| 22662,   | 322988, | 2507.6941, | 22700,   | 323090, | 2505.3409, | 22738,   | 325576, | 2502.9877, |
| 6.266823 |         |            | 6.260942 |         |            | 6.255061 |         |            |
| 22663,   | 322876, | 2507.6322, | 22701,   | 322984, | 2505.2790, | 22739,   | 325972, | 2502.9258, |
| 6.266668 |         |            | 6.260787 |         |            | 6.254906 |         |            |
| 22664,   | 322410, | 2507.5703, | 22702,   | 322742, | 2505.2171, | 22740,   | 326106, | 2502.8638, |
| 6.266513 |         |            | 6.260632 |         |            | 6.254752 |         |            |
| 22665,   | 321612, | 2507.5084, | 22703,   | 322512, | 2505.1551, | 22741,   | 326116, | 2502.8019, |
| 6.266358 |         |            | 6.260478 |         |            | 6.254597 |         |            |
| 22666,   | 320780, | 2507.4464, | 22704,   | 322580, | 2505.0932, | 22742,   | 326306, | 2502.7400, |
| 6.266204 |         |            | 6.260323 |         |            | 6.254442 |         |            |
| 22667,   | 320160, | 2507.3845, | 22705,   | 322970, | 2505.0313, | 22743,   | 326726, | 2502.6781, |
| 6.266049 |         |            | 6.260168 |         |            | 6.254287 |         |            |
| 22668,   | 319706, | 2507.3226, | 22706,   | 323376, | 2504.9693, | 22744,   | 327058, | 2502.6161, |
| 6.265894 |         |            | 6.260013 |         |            | 6.254132 |         |            |
| 22669,   | 319216, | 2507.2606, | 22707,   | 323488, | 2504.9074, | 22745,   | 327046, | 2502.5542, |
| 6.265739 |         |            | 6.259859 |         |            | 6.253978 |         |            |
| 22670,   | 318618, | 2507.1987, | 22708,   | 323364, | 2504.8455, | 22746,   | 326810, | 2502.4923, |
| 6.265585 |         |            | 6.259704 |         |            | 6.253823 |         |            |
| 22671,   | 318078, | 2507.1368, | 22709,   | 323378, | 2504.7836, | 22747,   | 326736, | 2502.4303, |
| 6.265430 |         |            | 6.259549 |         |            | 6.253668 |         |            |
| 22672,   | 317782, | 2507.0749, | 22710,   | 323778, | 2504.7216, | 22748,   | 326970, | 2502.3684, |
| 6.265275 |         |            | 6.259394 |         |            | 6.253513 |         |            |
| 22673,   | 317730, | 2507.0129, | 22711,   | 324414, | 2504.6597, | 22749,   | 327198, | 2502.3065, |
| 6.265120 |         |            | 6.259239 |         |            | 6.253359 |         |            |
| 22674,   | 317788, | 2506.9510, | 22712,   | 324928, | 2504.5978, | 22750,   | 326972, | 2502.2446, |
| 6.264966 |         |            | 6.259085 |         |            | 6.253204 |         |            |
| 22675,   | 317936, | 2506.8891, | 22713,   | 325210, | 2504.5359, | 22751,   | 326278, | 2502.1826, |
| 6.264811 |         |            | 6.258930 |         |            | 6.253049 |         |            |
| 22676,   | 318334, | 2506.8272, | 22714,   | 325548, | 2504.4739, | 22752,   | 325674, | 2502.1207, |
| 6.264656 |         |            | 6.258775 |         |            | 6.252894 |         |            |
| 22677,   | 319116, | 2506.7652, | 22715,   | 326252, | 2504.4120, | 22753,   | 325756, | 2502.0588, |
| 6.264501 |         |            | 6.258620 |         |            | 6.252740 |         |            |
| 22678,   | 320108, | 2506.7033, | 22716,   | 327212, | 2504.3501, | 22754,   | 326546, | 2501.9969, |
| 6.264346 |         |            | 6.258466 |         |            | 6.252585 |         |            |
| 22679,   | 320944, | 2506.6414, | 22717,   | 327920, | 2504.2882, | 22755,   | 327494, | 2501.9349, |
| 6.264192 |         |            | 6.258311 |         |            | 6.252430 |         |            |
| 22680,   | 321422, | 2506.5794, | 22718,   | 327970, | 2504.2262, | 22756,   | 328042, | 2501.8730, |
| 6.264037 |         |            | 6.258156 |         |            | 6.252275 |         |            |
| 22681,   | 321746, | 2506.5175, | 22719,   | 327470, | 2504.1643, | 22757,   | 328176, | 2501.8111, |
| 6.263882 |         |            | 6.258001 |         |            | 6.252121 |         |            |
| 22682,   | 322280, | 2506.4556, | 22720,   | 326950, | 2504.1024, | 22758,   | 328318, | 2501.7491, |
| 6.263727 |         |            | 6.257847 |         |            | 6.251966 |         |            |
| 22683,   | 323076, | 2506.3937, | 22721,   | 326802, | 2504.0404, | 22759,   | 328734, | 2501.6872, |
| 6.263573 |         |            | 6.257692 |         |            | 6.251811 |         |            |
| 22684,   | 323726, | 2506.3317, | 22722,   | 326954, | 2503.9785, | 22760,   | 329148, | 2501.6253, |
| 6.263418 |         |            | 6.257537 |         |            | 6.251656 |         |            |
| 22685,   | 323752, | 2506.2698, | 22723,   | 327094, | 2503.9166, | 22761,   | 329034, | 2501.5634, |
| 6.263263 |         |            | 6.257382 |         |            | 6.251502 |         |            |
| 22686,   | 323178, | 2506.2079, | 22724,   | 327096, | 2503.8547, | 22762,   | 328210, | 2501.5014, |
| 6.263108 |         |            | 6.257228 |         |            | 6.251347 |         |            |
| 22687,   | 322590, | 2506.1460, | 22725,   | 327154, | 2503.7927, | 22763,   | 327090, | 2501.4395, |
| 6.262954 |         |            | 6.257073 |         |            | 6.251192 |         |            |
| 22688,   | 322614, | 2506.0840, | 22726,   | 327450, | 2503.7308, | 22764,   | 326266, | 2501.3776, |
| 6.262799 |         |            | 6.256918 |         |            | 6.251037 |         |            |
| 22689,   | 323320, | 2506.0221, | 22727,   | 327776, | 2503.6689, | 22765,   | 325976, | 2501.3157, |
| 6.262644 |         |            | 6.256763 |         |            | 6.250883 |         |            |
| 22690,   | 324192, | 2505.9602, | 22728,   | 327686, | 2503.6070, | 22766,   | 325974, | 2501.2537, |
| 6.262489 |         |            | 6.256609 |         |            | 6.250728 |         |            |
| 22691,   | 324674, | 2505.8983, | 22729,   | 326984, | 2503.5450, | 22767,   | 325944, | 2501.1918, |
| 6.262335 |         |            | 6.256454 |         |            | 6.250573 |         |            |
| 22692,   | 324696, | 2505.8363, | 22730,   | 326024, | 2503.4831, | 22768,   | 325858, | 2501.1299, |
| 6.262180 |         |            | 6.256299 |         |            | 6.250418 |         |            |
| 22693,   | 324600, | 2505.7744, | 22731,   | 325396, | 2503.4212, | 22769,   | 325936, | 2501.0680, |
| 6.262025 |         |            | 6.256144 |         |            | 6.250264 |         |            |
| 22694,   | 324682, | 2505.7125, | 22732,   | 325376, | 2503.3592, | 22770,   | 326216, | 2501.0060, |
| 6.261870 |         |            | 6.255990 |         |            | 6.250109 |         |            |

|          |         |            |          |         |            |          |         |            |
|----------|---------|------------|----------|---------|------------|----------|---------|------------|
| 22771,   | 326436, | 2500.9441, | 22809,   | 327942, | 2498.5909, | 22847,   | 330108, | 2496.2377, |
| 6.249954 |         |            | 6.244073 |         |            | 6.238192 |         |            |
| 22772,   | 326302, | 2500.8822, | 22810,   | 327556, | 2498.5290, | 22848,   | 330570, | 2496.1757, |
| 6.249799 |         |            | 6.243918 |         |            | 6.238038 |         |            |
| 22773,   | 325898, | 2500.8202, | 22811,   | 327062, | 2498.4670, | 22849,   | 330934, | 2496.1138, |
| 6.249645 |         |            | 6.243764 |         |            | 6.237883 |         |            |
| 22774,   | 325638, | 2500.7583, | 22812,   | 326886, | 2498.4051, | 22850,   | 331446, | 2496.0519, |
| 6.249490 |         |            | 6.243609 |         |            | 6.237728 |         |            |
| 22775,   | 325848, | 2500.6964, | 22813,   | 327102, | 2498.3432, | 22851,   | 332114, | 2495.9899, |
| 6.249335 |         |            | 6.243454 |         |            | 6.237573 |         |            |
| 22776,   | 326354, | 2500.6345, | 22814,   | 327292, | 2498.2812, | 22852,   | 332538, | 2495.9280, |
| 6.249180 |         |            | 6.243299 |         |            | 6.237419 |         |            |
| 22777,   | 326670, | 2500.5725, | 22815,   | 327030, | 2498.2193, | 22853,   | 332294, | 2495.8661, |
| 6.249025 |         |            | 6.243145 |         |            | 6.237264 |         |            |
| 22778,   | 326504, | 2500.5106, | 22816,   | 326412, | 2498.1574, | 22854,   | 331484, | 2495.8042, |
| 6.248871 |         |            | 6.242990 |         |            | 6.237109 |         |            |
| 22779,   | 326054, | 2500.4487, | 22817,   | 326022, | 2498.0955, | 22855,   | 330778, | 2495.7422, |
| 6.248716 |         |            | 6.242835 |         |            | 6.236954 |         |            |
| 22780,   | 325746, | 2500.3868, | 22818,   | 326342, | 2498.0335, | 22856,   | 330790, | 2495.6803, |
| 6.248561 |         |            | 6.242680 |         |            | 6.236800 |         |            |
| 22781,   | 325728, | 2500.3248, | 22819,   | 327212, | 2497.9716, | 22857,   | 331484, | 2495.6184, |
| 6.248406 |         |            | 6.242526 |         |            | 6.236645 |         |            |
| 22782,   | 325744, | 2500.2629, | 22820,   | 327976, | 2497.9097, | 22858,   | 332202, | 2495.5565, |
| 6.248252 |         |            | 6.242371 |         |            | 6.236490 |         |            |
| 22783,   | 325520, | 2500.2010, | 22821,   | 328114, | 2497.8478, | 22859,   | 332322, | 2495.4945, |
| 6.248097 |         |            | 6.242216 |         |            | 6.236335 |         |            |
| 22784,   | 325146, | 2500.1391, | 22822,   | 327736, | 2497.7858, | 22860,   | 331810, | 2495.4326, |
| 6.247942 |         |            | 6.242061 |         |            | 6.236181 |         |            |
| 22785,   | 325028, | 2500.0771, | 22823,   | 327386, | 2497.7239, | 22861,   | 331156, | 2495.3707, |
| 6.247787 |         |            | 6.241907 |         |            | 6.236026 |         |            |
| 22786,   | 325424, | 2500.0152, | 22824,   | 327428, | 2497.6620, | 22862,   | 330782, | 2495.3088, |
| 6.247633 |         |            | 6.241752 |         |            | 6.235871 |         |            |
| 22787,   | 326094, | 2499.9533, | 22825,   | 327720, | 2497.6000, | 22863,   | 330652, | 2495.2468, |
| 6.247478 |         |            | 6.241597 |         |            | 6.235716 |         |            |
| 22788,   | 326526, | 2499.8913, | 22826,   | 327908, | 2497.5381, | 22864,   | 330488, | 2495.1849, |
| 6.247323 |         |            | 6.241442 |         |            | 6.235562 |         |            |
| 22789,   | 326438, | 2499.8294, | 22827,   | 327944, | 2497.4762, | 22865,   | 330216, | 2495.1230, |
| 6.247168 |         |            | 6.241288 |         |            | 6.235407 |         |            |
| 22790,   | 326032, | 2499.7675, | 22828,   | 328136, | 2497.4143, | 22866,   | 330104, | 2495.0610, |
| 6.247014 |         |            | 6.241133 |         |            | 6.235252 |         |            |
| 22791,   | 325718, | 2499.7056, | 22829,   | 328724, | 2497.3523, | 22867,   | 330422, | 2494.9991, |
| 6.246859 |         |            | 6.240978 |         |            | 6.235097 |         |            |
| 22792,   | 325662, | 2499.6436, | 22830,   | 329496, | 2497.2904, | 22868,   | 331016, | 2494.9372, |
| 6.246704 |         |            | 6.240823 |         |            | 6.234943 |         |            |
| 22793,   | 325676, | 2499.5817, | 22831,   | 329940, | 2497.2285, | 22869,   | 331408, | 2494.8753, |
| 6.246549 |         |            | 6.240669 |         |            | 6.234788 |         |            |
| 22794,   | 325558, | 2499.5198, | 22832,   | 329816, | 2497.1666, | 22870,   | 331250, | 2494.8133, |
| 6.246395 |         |            | 6.240514 |         |            | 6.234633 |         |            |
| 22795,   | 325418, | 2499.4579, | 22833,   | 329458, | 2497.1046, | 22871,   | 330680, | 2494.7514, |
| 6.246240 |         |            | 6.240359 |         |            | 6.234478 |         |            |
| 22796,   | 325600, | 2499.3959, | 22834,   | 329476, | 2497.0427, | 22872,   | 330172, | 2494.6895, |
| 6.246085 |         |            | 6.240204 |         |            | 6.234323 |         |            |
| 22797,   | 326286, | 2499.3340, | 22835,   | 330124, | 2496.9808, | 22873,   | 330046, | 2494.6276, |
| 6.245930 |         |            | 6.240050 |         |            | 6.234169 |         |            |
| 22798,   | 327230, | 2499.2721, | 22836,   | 331070, | 2496.9189, | 22874,   | 330224, | 2494.5656, |
| 6.245776 |         |            | 6.239895 |         |            | 6.234014 |         |            |
| 22799,   | 327994, | 2499.2101, | 22837,   | 331784, | 2496.8569, | 22875,   | 330412, | 2494.5037, |
| 6.245621 |         |            | 6.239740 |         |            | 6.233859 |         |            |
| 22800,   | 328310, | 2499.1482, | 22838,   | 332056, | 2496.7950, | 22876,   | 330472, | 2494.4418, |
| 6.245466 |         |            | 6.239585 |         |            | 6.233704 |         |            |
| 22801,   | 328256, | 2499.0863, | 22839,   | 332088, | 2496.7331, | 22877,   | 330492, | 2494.3798, |
| 6.245311 |         |            | 6.239430 |         |            | 6.233550 |         |            |
| 22802,   | 328056, | 2499.0244, | 22840,   | 332086, | 2496.6711, | 22878,   | 330586, | 2494.3179, |
| 6.245157 |         |            | 6.239276 |         |            | 6.233395 |         |            |
| 22803,   | 327816, | 2498.9624, | 22841,   | 331946, | 2496.6092, | 22879,   | 330714, | 2494.2560, |
| 6.245002 |         |            | 6.239121 |         |            | 6.233240 |         |            |
| 22804,   | 327542, | 2498.9005, | 22842,   | 331400, | 2496.5473, | 22880,   | 330780, | 2494.1941, |
| 6.244847 |         |            | 6.238966 |         |            | 6.233085 |         |            |
| 22805,   | 327302, | 2498.8386, | 22843,   | 330470, | 2496.4854, | 22881,   | 330854, | 2494.1321, |
| 6.244692 |         |            | 6.238811 |         |            | 6.232931 |         |            |
| 22806,   | 327284, | 2498.7767, | 22844,   | 329580, | 2496.4234, | 22882,   | 331168, | 2494.0702, |
| 6.244537 |         |            | 6.238657 |         |            | 6.232776 |         |            |
| 22807,   | 327560, | 2498.7147, | 22845,   | 329246, | 2496.3615, | 22883,   | 331774, | 2494.0083, |
| 6.244383 |         |            | 6.238502 |         |            | 6.232621 |         |            |
| 22808,   | 327906, | 2498.6528, | 22846,   | 329544, | 2496.2996, | 22884,   | 332388, | 2493.9464, |
| 6.244228 |         |            | 6.238347 |         |            | 6.232466 |         |            |

|          |         |            |          |         |            |          |         |            |
|----------|---------|------------|----------|---------|------------|----------|---------|------------|
| 22885,   | 332538, | 2493.8844, | 22923,   | 334264, | 2491.5312, | 22961,   | 335230, | 2489.1780, |
| 6.232312 |         |            | 6.226431 |         |            | 6.220550 |         |            |
| 22886,   | 332046, | 2493.8225, | 22924,   | 334002, | 2491.4693, | 22962,   | 334760, | 2489.1161, |
| 6.232157 |         |            | 6.226276 |         |            | 6.220395 |         |            |
| 22887,   | 331226, | 2493.7606, | 22925,   | 333040, | 2491.4074, | 22963,   | 334524, | 2489.0541, |
| 6.232002 |         |            | 6.226121 |         |            | 6.220241 |         |            |
| 22888,   | 330578, | 2493.6987, | 22926,   | 332164, | 2491.3454, | 22964,   | 334872, | 2488.9922, |
| 6.231847 |         |            | 6.225967 |         |            | 6.220086 |         |            |
| 22889,   | 330330, | 2493.6367, | 22927,   | 332004, | 2491.2835, | 22965,   | 335608, | 2488.9303, |
| 6.231693 |         |            | 6.225812 |         |            | 6.219931 |         |            |
| 22890,   | 330274, | 2493.5748, | 22928,   | 332446, | 2491.2216, | 22966,   | 336112, | 2488.8684, |
| 6.231538 |         |            | 6.225657 |         |            | 6.219776 |         |            |
| 22891,   | 330134, | 2493.5129, | 22929,   | 332912, | 2491.1596, | 22967,   | 335928, | 2488.8064, |
| 6.231383 |         |            | 6.225502 |         |            | 6.219622 |         |            |
| 22892,   | 329934, | 2493.4509, | 22930,   | 332964, | 2491.0977, | 22968,   | 335226, | 2488.7445, |
| 6.231228 |         |            | 6.225348 |         |            | 6.219467 |         |            |
| 22893,   | 329976, | 2493.3890, | 22931,   | 332722, | 2491.0358, | 22969,   | 334592, | 2488.6826, |
| 6.231074 |         |            | 6.225193 |         |            | 6.219312 |         |            |
| 22894,   | 330440, | 2493.3271, | 22932,   | 332616, | 2490.9739, | 22970,   | 334388, | 2488.6206, |
| 6.230919 |         |            | 6.225038 |         |            | 6.219157 |         |            |
| 22895,   | 331132, | 2493.2652, | 22933,   | 332932, | 2490.9119, | 22971,   | 334430, | 2488.5587, |
| 6.230764 |         |            | 6.224883 |         |            | 6.219002 |         |            |
| 22896,   | 331700, | 2493.2032, | 22934,   | 333594, | 2490.8500, | 22972,   | 334330, | 2488.4968, |
| 6.230609 |         |            | 6.224729 |         |            | 6.218848 |         |            |
| 22897,   | 332078, | 2493.1413, | 22935,   | 334340, | 2490.7881, | 22973,   | 334050, | 2488.4349, |
| 6.230455 |         |            | 6.224574 |         |            | 6.218693 |         |            |
| 22898,   | 332572, | 2493.0794, | 22936,   | 334964, | 2490.7262, | 22974,   | 334046, | 2488.3729, |
| 6.230300 |         |            | 6.224419 |         |            | 6.218538 |         |            |
| 22899,   | 333452, | 2493.0175, | 22937,   | 335330, | 2490.6642, | 22975,   | 334728, | 2488.3110, |
| 6.230145 |         |            | 6.224264 |         |            | 6.218383 |         |            |
| 22900,   | 334506, | 2492.9555, | 22938,   | 335288, | 2490.6023, | 22976,   | 335926, | 2488.2491, |
| 6.229990 |         |            | 6.224109 |         |            | 6.218229 |         |            |
| 22901,   | 335138, | 2492.8936, | 22939,   | 334730, | 2490.5404, | 22977,   | 336928, | 2488.1872, |
| 6.229836 |         |            | 6.223955 |         |            | 6.218074 |         |            |
| 22902,   | 334912, | 2492.8317, | 22940,   | 333818, | 2490.4785, | 22978,   | 337162, | 2488.1252, |
| 6.229681 |         |            | 6.223800 |         |            | 6.217919 |         |            |
| 22903,   | 334038, | 2492.7697, | 22941,   | 333026, | 2490.4165, | 22979,   | 336720, | 2488.0633, |
| 6.229526 |         |            | 6.223645 |         |            | 6.217764 |         |            |
| 22904,   | 333122, | 2492.7078, | 22942,   | 332790, | 2490.3546, | 22980,   | 336208, | 2488.0014, |
| 6.229371 |         |            | 6.223490 |         |            | 6.217610 |         |            |
| 22905,   | 332598, | 2492.6459, | 22943,   | 333104, | 2490.2927, | 22981,   | 336118, | 2487.9395, |
| 6.229216 |         |            | 6.223336 |         |            | 6.217455 |         |            |
| 22906,   | 332346, | 2492.5840, | 22944,   | 333504, | 2490.2307, | 22982,   | 336416, | 2487.8775, |
| 6.229062 |         |            | 6.223181 |         |            | 6.217300 |         |            |
| 22907,   | 332000, | 2492.5220, | 22945,   | 333504, | 2490.1688, | 22983,   | 336756, | 2487.8156, |
| 6.228907 |         |            | 6.223026 |         |            | 6.217145 |         |            |
| 22908,   | 331484, | 2492.4601, | 22946,   | 333094, | 2490.1069, | 22984,   | 336960, | 2487.7537, |
| 6.228752 |         |            | 6.222871 |         |            | 6.216991 |         |            |
| 22909,   | 331148, | 2492.3982, | 22947,   | 332728, | 2490.0450, | 22985,   | 337160, | 2487.6917, |
| 6.228597 |         |            | 6.222717 |         |            | 6.216836 |         |            |
| 22910,   | 331308, | 2492.3363, | 22948,   | 332782, | 2489.9830, | 22986,   | 337460, | 2487.6298, |
| 6.228443 |         |            | 6.222562 |         |            | 6.216681 |         |            |
| 22911,   | 331776, | 2492.2743, | 22949,   | 333102, | 2489.9211, | 22987,   | 337618, | 2487.5679, |
| 6.228288 |         |            | 6.222407 |         |            | 6.216526 |         |            |
| 22912,   | 331986, | 2492.2124, | 22950,   | 333188, | 2489.8592, | 22988,   | 337210, | 2487.5060, |
| 6.228133 |         |            | 6.222252 |         |            | 6.216372 |         |            |
| 22913,   | 331594, | 2492.1505, | 22951,   | 332752, | 2489.7973, | 22989,   | 336116, | 2487.4440, |
| 6.227978 |         |            | 6.222098 |         |            | 6.216217 |         |            |
| 22914,   | 330910, | 2492.0886, | 22952,   | 332100, | 2489.7353, | 22990,   | 334766, | 2487.3821, |
| 6.227824 |         |            | 6.221943 |         |            | 6.216062 |         |            |
| 22915,   | 330562, | 2492.0266, | 22953,   | 331828, | 2489.6734, | 22991,   | 333790, | 2487.3202, |
| 6.227669 |         |            | 6.221788 |         |            | 6.215907 |         |            |
| 22916,   | 330864, | 2491.9647, | 22954,   | 332264, | 2489.6115, | 22992,   | 333462, | 2487.2583, |
| 6.227514 |         |            | 6.221633 |         |            | 6.215753 |         |            |
| 22917,   | 331460, | 2491.9028, | 22955,   | 333168, | 2489.5495, | 22993,   | 333528, | 2487.1963, |
| 6.227359 |         |            | 6.221479 |         |            | 6.215598 |         |            |
| 22918,   | 331798, | 2491.8408, | 22956,   | 334050, | 2489.4876, | 22994,   | 333604, | 2487.1344, |
| 6.227205 |         |            | 6.221324 |         |            | 6.215443 |         |            |
| 22919,   | 331788, | 2491.7789, | 22957,   | 334648, | 2489.4257, | 22995,   | 333636, | 2487.0725, |
| 6.227050 |         |            | 6.221169 |         |            | 6.215288 |         |            |
| 22920,   | 331894, | 2491.7170, | 22958,   | 335044, | 2489.3638, | 22996,   | 333880, | 2487.0105, |
| 6.226895 |         |            | 6.221014 |         |            | 6.215134 |         |            |
| 22921,   | 332566, | 2491.6551, | 22959,   | 335358, | 2489.3018, | 22997,   | 334468, | 2486.9486, |
| 6.226740 |         |            | 6.220860 |         |            | 6.214979 |         |            |
| 22922,   | 333602, | 2491.5931, | 22960,   | 335472, | 2489.2399, | 22998,   | 335130, | 2486.8867, |
| 6.226586 |         |            | 6.220705 |         |            | 6.214824 |         |            |

|          |         |            |          |         |            |          |         |            |
|----------|---------|------------|----------|---------|------------|----------|---------|------------|
| 22999,   | 335472, | 2486.8248, | 23037,   | 335656, | 2484.4715, | 23075,   | 338212, | 2482.1183, |
| 6.214669 |         |            | 6.208788 |         |            | 6.202908 |         |            |
| 23000,   | 335412, | 2486.7628, | 23038,   | 335160, | 2484.4096, | 23076,   | 338324, | 2482.0564, |
| 6.214515 |         |            | 6.208634 |         |            | 6.202753 |         |            |
| 23001,   | 335306, | 2486.7009, | 23039,   | 334218, | 2484.3477, | 23077,   | 338418, | 2481.9945, |
| 6.214360 |         |            | 6.208479 |         |            | 6.202598 |         |            |
| 23002,   | 335476, | 2486.6390, | 23040,   | 333582, | 2484.2858, | 23078,   | 338824, | 2481.9325, |
| 6.214205 |         |            | 6.208324 |         |            | 6.202443 |         |            |
| 23003,   | 335808, | 2486.5771, | 23041,   | 333686, | 2484.2238, | 23079,   | 339392, | 2481.8706, |
| 6.214050 |         |            | 6.208169 |         |            | 6.202289 |         |            |
| 23004,   | 335830, | 2486.5151, | 23042,   | 334276, | 2484.1619, | 23080,   | 339602, | 2481.8087, |
| 6.213895 |         |            | 6.208015 |         |            | 6.202134 |         |            |
| 23005,   | 335294, | 2486.4532, | 23043,   | 334838, | 2484.1000, | 23081,   | 339136, | 2481.7468, |
| 6.213741 |         |            | 6.207860 |         |            | 6.201979 |         |            |
| 23006,   | 334568, | 2486.3913, | 23044,   | 335196, | 2484.0381, | 23082,   | 338282, | 2481.6848, |
| 6.213586 |         |            | 6.207705 |         |            | 6.201824 |         |            |
| 23007,   | 334302, | 2486.3294, | 23045,   | 335628, | 2483.9761, | 23083,   | 337652, | 2481.6229, |
| 6.213431 |         |            | 6.207550 |         |            | 6.201670 |         |            |
| 23008,   | 334776, | 2486.2674, | 23046,   | 336408, | 2483.9142, | 23084,   | 337604, | 2481.5610, |
| 6.213276 |         |            | 6.207396 |         |            | 6.201515 |         |            |
| 23009,   | 335594, | 2486.2055, | 23047,   | 337390, | 2483.8523, | 23085,   | 337944, | 2481.4991, |
| 6.213122 |         |            | 6.207241 |         |            | 6.201360 |         |            |
| 23010,   | 336112, | 2486.1436, | 23048,   | 338106, | 2483.7903, | 23086,   | 338242, | 2481.4371, |
| 6.212967 |         |            | 6.207086 |         |            | 6.201205 |         |            |
| 23011,   | 336094, | 2486.0816, | 23049,   | 338242, | 2483.7284, | 23087,   | 338366, | 2481.3752, |
| 6.212812 |         |            | 6.206931 |         |            | 6.201051 |         |            |
| 23012,   | 335866, | 2486.0197, | 23050,   | 337946, | 2483.6665, | 23088,   | 338566, | 2481.3133, |
| 6.212657 |         |            | 6.206777 |         |            | 6.200896 |         |            |
| 23013,   | 335854, | 2485.9578, | 23051,   | 337606, | 2483.6046, | 23089,   | 339064, | 2481.2513, |
| 6.212503 |         |            | 6.206622 |         |            | 6.200741 |         |            |
| 23014,   | 336076, | 2485.8959, | 23052,   | 337428, | 2483.5426, | 23090,   | 339668, | 2481.1894, |
| 6.212348 |         |            | 6.206467 |         |            | 6.200586 |         |            |
| 23015,   | 336224, | 2485.8339, | 23053,   | 337310, | 2483.4807, | 23091,   | 339904, | 2481.1275, |
| 6.212193 |         |            | 6.206312 |         |            | 6.200432 |         |            |
| 23016,   | 336122, | 2485.7720, | 23054,   | 337102, | 2483.4188, | 23092,   | 339576, | 2481.0656, |
| 6.212038 |         |            | 6.206158 |         |            | 6.200277 |         |            |
| 23017,   | 335996, | 2485.7101, | 23055,   | 336854, | 2483.3569, | 23093,   | 339042, | 2481.0036, |
| 6.211884 |         |            | 6.206003 |         |            | 6.200122 |         |            |
| 23018,   | 336144, | 2485.6482, | 23056,   | 336738, | 2483.2949, | 23094,   | 338874, | 2480.9417, |
| 6.211729 |         |            | 6.205848 |         |            | 6.199967 |         |            |
| 23019,   | 336440, | 2485.5862, | 23057,   | 336728, | 2483.2330, | 23095,   | 339246, | 2480.8798, |
| 6.211574 |         |            | 6.205693 |         |            | 6.199813 |         |            |
| 23020,   | 336330, | 2485.5243, | 23058,   | 336570, | 2483.1711, | 23096,   | 339728, | 2480.8179, |
| 6.211419 |         |            | 6.205539 |         |            | 6.199658 |         |            |
| 23021,   | 335454, | 2485.4624, | 23059,   | 336076, | 2483.1092, | 23097,   | 339764, | 2480.7559, |
| 6.211265 |         |            | 6.205384 |         |            | 6.199503 |         |            |
| 23022,   | 334212, | 2485.4004, | 23060,   | 335446, | 2483.0472, | 23098,   | 339250, | 2480.6940, |
| 6.211110 |         |            | 6.205229 |         |            | 6.199348 |         |            |
| 23023,   | 333494, | 2485.3385, | 23061,   | 335144, | 2482.9853, | 23099,   | 338656, | 2480.6321, |
| 6.210955 |         |            | 6.205074 |         |            | 6.199193 |         |            |
| 23024,   | 333868, | 2485.2766, | 23062,   | 335430, | 2482.9234, | 23100,   | 338454, | 2480.5701, |
| 6.210800 |         |            | 6.204920 |         |            | 6.199039 |         |            |
| 23025,   | 334940, | 2485.2147, | 23063,   | 336042, | 2482.8614, | 23101,   | 338638, | 2480.5082, |
| 6.210646 |         |            | 6.204765 |         |            | 6.198884 |         |            |
| 23026,   | 335746, | 2485.1527, | 23064,   | 336430, | 2482.7995, | 23102,   | 338700, | 2480.4463, |
| 6.210491 |         |            | 6.204610 |         |            | 6.198729 |         |            |
| 23027,   | 335678, | 2485.0908, | 23065,   | 336310, | 2482.7376, | 23103,   | 338214, | 2480.3844, |
| 6.210336 |         |            | 6.204455 |         |            | 6.198574 |         |            |
| 23028,   | 335010, | 2485.0289, | 23066,   | 335912, | 2482.6757, | 23104,   | 337268, | 2480.3224, |
| 6.210181 |         |            | 6.204301 |         |            | 6.198420 |         |            |
| 23029,   | 334498, | 2484.9670, | 23067,   | 335676, | 2482.6137, | 23105,   | 336346, | 2480.2605, |
| 6.210027 |         |            | 6.204146 |         |            | 6.198265 |         |            |
| 23030,   | 334544, | 2484.9050, | 23068,   | 335758, | 2482.5518, | 23106,   | 335832, | 2480.1986, |
| 6.209872 |         |            | 6.203991 |         |            | 6.198110 |         |            |
| 23031,   | 334814, | 2484.8431, | 23069,   | 335934, | 2482.4899, | 23107,   | 335682, | 2480.1367, |
| 6.209717 |         |            | 6.203836 |         |            | 6.197955 |         |            |
| 23032,   | 334790, | 2484.7812, | 23070,   | 335964, | 2482.4280, | 23108,   | 335574, | 2480.0747, |
| 6.209562 |         |            | 6.203681 |         |            | 6.197801 |         |            |
| 23033,   | 334436, | 2484.7193, | 23071,   | 335954, | 2482.3660, | 23109,   | 335268, | 2480.0128, |
| 6.209408 |         |            | 6.203527 |         |            | 6.197646 |         |            |
| 23034,   | 334250, | 2484.6573, | 23072,   | 336234, | 2482.3041, | 23110,   | 334812, | 2479.9509, |
| 6.209253 |         |            | 6.203372 |         |            | 6.197491 |         |            |
| 23035,   | 334642, | 2484.5954, | 23073,   | 336928, | 2482.2422, | 23111,   | 334370, | 2479.8890, |
| 6.209098 |         |            | 6.203217 |         |            | 6.197336 |         |            |
| 23036,   | 335344, | 2484.5335, | 23074,   | 337728, | 2482.1802, | 23112,   | 334036, | 2479.8270, |
| 6.208943 |         |            | 6.203062 |         |            | 6.197182 |         |            |

|          |         |            |          |         |            |          |         |            |
|----------|---------|------------|----------|---------|------------|----------|---------|------------|
| 23113,   | 333830, | 2479.7651, | 23151,   | 338668, | 2477.4119, | 23189,   | 341226, | 2475.0587, |
| 6.197027 |         |            | 6.191146 |         |            | 6.185265 |         |            |
| 23114,   | 333828, | 2479.7032, | 23152,   | 338750, | 2477.3499, | 23190,   | 340972, | 2474.9967, |
| 6.196872 |         |            | 6.190991 |         |            | 6.185111 |         |            |
| 23115,   | 334166, | 2479.6412, | 23153,   | 338922, | 2477.2880, | 23191,   | 341002, | 2474.9348, |
| 6.196717 |         |            | 6.190837 |         |            | 6.184956 |         |            |
| 23116,   | 334902, | 2479.5793, | 23154,   | 339472, | 2477.2261, | 23192,   | 341518, | 2474.8729, |
| 6.196563 |         |            | 6.190682 |         |            | 6.184801 |         |            |
| 23117,   | 335874, | 2479.5174, | 23155,   | 340168, | 2477.1642, | 23193,   | 342206, | 2474.8109, |
| 6.196408 |         |            | 6.190527 |         |            | 6.184646 |         |            |
| 23118,   | 336788, | 2479.4555, | 23156,   | 340530, | 2477.1022, | 23194,   | 342572, | 2474.7490, |
| 6.196253 |         |            | 6.190372 |         |            | 6.184492 |         |            |
| 23119,   | 337454, | 2479.3935, | 23157,   | 340408, | 2477.0403, | 23195,   | 342450, | 2474.6871, |
| 6.196098 |         |            | 6.190218 |         |            | 6.184337 |         |            |
| 23120,   | 337906, | 2479.3316, | 23158,   | 340176, | 2476.9784, | 23196,   | 342218, | 2474.6252, |
| 6.195944 |         |            | 6.190063 |         |            | 6.184182 |         |            |
| 23121,   | 338306, | 2479.2697, | 23159,   | 340238, | 2476.9165, | 23197,   | 342334, | 2474.5632, |
| 6.195789 |         |            | 6.189908 |         |            | 6.184027 |         |            |
| 23122,   | 338726, | 2479.2078, | 23160,   | 340546, | 2476.8545, | 23198,   | 342838, | 2474.5013, |
| 6.195634 |         |            | 6.189753 |         |            | 6.183872 |         |            |
| 23123,   | 339158, | 2479.1458, | 23161,   | 340670, | 2476.7926, | 23199,   | 343278, | 2474.4394, |
| 6.195479 |         |            | 6.189599 |         |            | 6.183718 |         |            |
| 23124,   | 339618, | 2479.0839, | 23162,   | 340386, | 2476.7307, | 23200,   | 343248, | 2474.3775, |
| 6.195325 |         |            | 6.189444 |         |            | 6.183563 |         |            |
| 23125,   | 340178, | 2479.0220, | 23163,   | 340050, | 2476.6688, | 23201,   | 342828, | 2474.3155, |
| 6.195170 |         |            | 6.189289 |         |            | 6.183408 |         |            |
| 23126,   | 340818, | 2478.9600, | 23164,   | 340280, | 2476.6068, | 23202,   | 342486, | 2474.2536, |
| 6.195015 |         |            | 6.189134 |         |            | 6.183253 |         |            |
| 23127,   | 341312, | 2478.8981, | 23165,   | 341202, | 2476.5449, | 23203,   | 342594, | 2474.1917, |
| 6.194860 |         |            | 6.188979 |         |            | 6.183099 |         |            |
| 23128,   | 341336, | 2478.8362, | 23166,   | 342190, | 2476.4830, | 23204,   | 343068, | 2474.1298, |
| 6.194706 |         |            | 6.188825 |         |            | 6.182944 |         |            |
| 23129,   | 340814, | 2478.7743, | 23167,   | 342458, | 2476.4210, | 23205,   | 343570, | 2474.0678, |
| 6.194551 |         |            | 6.188670 |         |            | 6.182789 |         |            |
| 23130,   | 340096, | 2478.7123, | 23168,   | 341842, | 2476.3591, | 23206,   | 343930, | 2474.0059, |
| 6.194396 |         |            | 6.188515 |         |            | 6.182634 |         |            |
| 23131,   | 339648, | 2478.6504, | 23169,   | 340968, | 2476.2972, | 23207,   | 344262, | 2473.9440, |
| 6.194241 |         |            | 6.188360 |         |            | 6.182480 |         |            |
| 23132,   | 339570, | 2478.5885, | 23170,   | 340604, | 2476.2353, | 23208,   | 344696, | 2473.8820, |
| 6.194086 |         |            | 6.188206 |         |            | 6.182325 |         |            |
| 23133,   | 339504, | 2478.5266, | 23171,   | 340884, | 2476.1733, | 23209,   | 345098, | 2473.8201, |
| 6.193932 |         |            | 6.188051 |         |            | 6.182170 |         |            |
| 23134,   | 339038, | 2478.4646, | 23172,   | 341258, | 2476.1114, | 23210,   | 345166, | 2473.7582, |
| 6.193777 |         |            | 6.187896 |         |            | 6.182015 |         |            |
| 23135,   | 338260, | 2478.4027, | 23173,   | 341186, | 2476.0495, | 23211,   | 344818, | 2473.6963, |
| 6.193622 |         |            | 6.187741 |         |            | 6.181861 |         |            |
| 23136,   | 337764, | 2478.3408, | 23174,   | 340748, | 2475.9876, | 23212,   | 344304, | 2473.6343, |
| 6.193467 |         |            | 6.187587 |         |            | 6.181706 |         |            |
| 23137,   | 338048, | 2478.2789, | 23175,   | 340518, | 2475.9256, | 23213,   | 343932, | 2473.5724, |
| 6.193313 |         |            | 6.187432 |         |            | 6.181551 |         |            |
| 23138,   | 338958, | 2478.2169, | 23176,   | 340886, | 2475.8637, | 23214,   | 343686, | 2473.5105, |
| 6.193158 |         |            | 6.187277 |         |            | 6.181396 |         |            |
| 23139,   | 339776, | 2478.1550, | 23177,   | 341636, | 2475.8018, | 23215,   | 343260, | 2473.4486, |
| 6.193003 |         |            | 6.187122 |         |            | 6.181242 |         |            |
| 23140,   | 339920, | 2478.0931, | 23178,   | 342212, | 2475.7398, | 23216,   | 342532, | 2473.3866, |
| 6.192848 |         |            | 6.186968 |         |            | 6.181087 |         |            |
| 23141,   | 339520, | 2478.0311, | 23179,   | 342312, | 2475.6779, | 23217,   | 341848, | 2473.3247, |
| 6.192694 |         |            | 6.186813 |         |            | 6.180932 |         |            |
| 23142,   | 339176, | 2477.9692, | 23180,   | 342146, | 2475.6160, | 23218,   | 341772, | 2473.2628, |
| 6.192539 |         |            | 6.186658 |         |            | 6.180777 |         |            |
| 23143,   | 339268, | 2477.9073, | 23181,   | 342072, | 2475.5541, | 23219,   | 342438, | 2473.2008, |
| 6.192384 |         |            | 6.186503 |         |            | 6.180623 |         |            |
| 23144,   | 339490, | 2477.8454, | 23182,   | 342144, | 2475.4921, | 23220,   | 343302, | 2473.1389, |
| 6.192229 |         |            | 6.186349 |         |            | 6.180468 |         |            |
| 23145,   | 339258, | 2477.7834, | 23183,   | 342102, | 2475.4302, | 23221,   | 343580, | 2473.0770, |
| 6.192075 |         |            | 6.186194 |         |            | 6.180313 |         |            |
| 23146,   | 338402, | 2477.7215, | 23184,   | 341774, | 2475.3683, | 23222,   | 342998, | 2473.0151, |
| 6.191920 |         |            | 6.186039 |         |            | 6.180158 |         |            |
| 23147,   | 337448, | 2477.6596, | 23185,   | 341340, | 2475.3064, | 23223,   | 342054, | 2472.9531, |
| 6.191765 |         |            | 6.185884 |         |            | 6.180004 |         |            |
| 23148,   | 337114, | 2477.5977, | 23186,   | 341146, | 2475.2444, | 23224,   | 341504, | 2472.8912, |
| 6.191610 |         |            | 6.185730 |         |            | 6.179849 |         |            |
| 23149,   | 337548, | 2477.5357, | 23187,   | 341246, | 2475.1825, | 23225,   | 341636, | 2472.8293, |
| 6.191456 |         |            | 6.185575 |         |            | 6.179694 |         |            |
| 23150,   | 338256, | 2477.4738, | 23188,   | 341364, | 2475.1206, | 23226,   | 342090, | 2472.7674, |
| 6.191301 |         |            | 6.185420 |         |            | 6.179539 |         |            |

|          |         |            |          |         |            |          |         |            |
|----------|---------|------------|----------|---------|------------|----------|---------|------------|
| 23227,   | 342360, | 2472.7054, | 23265,   | 343334, | 2470.3522, | 23303,   | 344928, | 2467.9990, |
| 6.179385 |         |            | 6.173504 |         |            | 6.167623 |         |            |
| 23228,   | 342324, | 2472.6435, | 23266,   | 342684, | 2470.2903, | 23304,   | 345006, | 2467.9371, |
| 6.179230 |         |            | 6.173349 |         |            | 6.167468 |         |            |
| 23229,   | 342270, | 2472.5816, | 23267,   | 342336, | 2470.2284, | 23305,   | 345276, | 2467.8751, |
| 6.179075 |         |            | 6.173194 |         |            | 6.167313 |         |            |
| 23230,   | 342460, | 2472.5197, | 23268,   | 342440, | 2470.1664, | 23306,   | 345666, | 2467.8132, |
| 6.178920 |         |            | 6.173039 |         |            | 6.167159 |         |            |
| 23231,   | 342772, | 2472.4577, | 23269,   | 342724, | 2470.1045, | 23307,   | 345852, | 2467.7513, |
| 6.178765 |         |            | 6.172885 |         |            | 6.167004 |         |            |
| 23232,   | 342906, | 2472.3958, | 23270,   | 342922, | 2470.0426, | 23308,   | 345608, | 2467.6894, |
| 6.178611 |         |            | 6.172730 |         |            | 6.166849 |         |            |
| 23233,   | 342822, | 2472.3339, | 23271,   | 343174, | 2469.9806, | 23309,   | 345140, | 2467.6274, |
| 6.178456 |         |            | 6.172575 |         |            | 6.166694 |         |            |
| 23234,   | 342828, | 2472.2719, | 23272,   | 343902, | 2469.9187, | 23310,   | 344918, | 2467.5655, |
| 6.178301 |         |            | 6.172420 |         |            | 6.166540 |         |            |
| 23235,   | 343216, | 2472.2100, | 23273,   | 345212, | 2469.8568, | 23311,   | 345208, | 2467.5036, |
| 6.178146 |         |            | 6.172266 |         |            | 6.166385 |         |            |
| 23236,   | 343884, | 2472.1481, | 23274,   | 346604, | 2469.7949, | 23312,   | 345796, | 2467.4416, |
| 6.177992 |         |            | 6.172111 |         |            | 6.166230 |         |            |
| 23237,   | 344424, | 2472.0862, | 23275,   | 347326, | 2469.7329, | 23313,   | 346200, | 2467.3797, |
| 6.177837 |         |            | 6.171956 |         |            | 6.166075 |         |            |
| 23238,   | 344602, | 2472.0242, | 23276,   | 347090, | 2469.6710, | 23314,   | 346202, | 2467.3178, |
| 6.177682 |         |            | 6.171801 |         |            | 6.165921 |         |            |
| 23239,   | 344670, | 2471.9623, | 23277,   | 346360, | 2469.6091, | 23315,   | 346018, | 2467.2559, |
| 6.177527 |         |            | 6.171647 |         |            | 6.165766 |         |            |
| 23240,   | 345084, | 2471.9004, | 23278,   | 345836, | 2469.5472, | 23316,   | 346014, | 2467.1939, |
| 6.177373 |         |            | 6.171492 |         |            | 6.165611 |         |            |
| 23241,   | 345978, | 2471.8385, | 23279,   | 345770, | 2469.4852, | 23317,   | 346242, | 2467.1320, |
| 6.177218 |         |            | 6.171337 |         |            | 6.165456 |         |            |
| 23242,   | 346950, | 2471.7765, | 23280,   | 345792, | 2469.4233, | 23318,   | 346404, | 2467.0701, |
| 6.177063 |         |            | 6.171182 |         |            | 6.165302 |         |            |
| 23243,   | 347484, | 2471.7146, | 23281,   | 345438, | 2469.3614, | 23319,   | 346224, | 2467.0082, |
| 6.176908 |         |            | 6.171028 |         |            | 6.165147 |         |            |
| 23244,   | 347420, | 2471.6527, | 23282,   | 344724, | 2469.2995, | 23320,   | 345790, | 2466.9462, |
| 6.176754 |         |            | 6.170873 |         |            | 6.164992 |         |            |
| 23245,   | 347072, | 2471.5907, | 23283,   | 344104, | 2469.2375, | 23321,   | 345446, | 2466.8843, |
| 6.176599 |         |            | 6.170718 |         |            | 6.164837 |         |            |
| 23246,   | 346794, | 2471.5288, | 23284,   | 343922, | 2469.1756, | 23322,   | 345370, | 2466.8224, |
| 6.176444 |         |            | 6.170563 |         |            | 6.164683 |         |            |
| 23247,   | 346572, | 2471.4669, | 23285,   | 343990, | 2469.1137, | 23323,   | 345412, | 2466.7604, |
| 6.176289 |         |            | 6.170409 |         |            | 6.164528 |         |            |
| 23248,   | 346146, | 2471.4050, | 23286,   | 343860, | 2469.0517, | 23324,   | 345328, | 2466.6985, |
| 6.176135 |         |            | 6.170254 |         |            | 6.164373 |         |            |
| 23249,   | 345432, | 2471.3430, | 23287,   | 343398, | 2468.9898, | 23325,   | 345132, | 2466.6366, |
| 6.175980 |         |            | 6.170099 |         |            | 6.164218 |         |            |
| 23250,   | 344750, | 2471.2811, | 23288,   | 342974, | 2468.9279, | 23326,   | 345086, | 2466.5747, |
| 6.175825 |         |            | 6.169944 |         |            | 6.164064 |         |            |
| 23251,   | 344564, | 2471.2192, | 23289,   | 343046, | 2468.8660, | 23327,   | 345364, | 2466.5127, |
| 6.175670 |         |            | 6.169790 |         |            | 6.163909 |         |            |
| 23252,   | 345018, | 2471.1573, | 23290,   | 343598, | 2468.8040, | 23328,   | 345752, | 2466.4508, |
| 6.175516 |         |            | 6.169635 |         |            | 6.163754 |         |            |
| 23253,   | 345812, | 2471.0953, | 23291,   | 344058, | 2468.7421, | 23329,   | 345890, | 2466.3889, |
| 6.175361 |         |            | 6.169480 |         |            | 6.163599 |         |            |
| 23254,   | 346532, | 2471.0334, | 23292,   | 343934, | 2468.6802, | 23330,   | 345702, | 2466.3270, |
| 6.175206 |         |            | 6.169325 |         |            | 6.163444 |         |            |
| 23255,   | 346988, | 2470.9715, | 23293,   | 343328, | 2468.6183, | 23331,   | 345534, | 2466.2650, |
| 6.175051 |         |            | 6.169171 |         |            | 6.163290 |         |            |
| 23256,   | 347238, | 2470.9096, | 23294,   | 342850, | 2468.5563, | 23332,   | 345768, | 2466.2031, |
| 6.174897 |         |            | 6.169016 |         |            | 6.163135 |         |            |
| 23257,   | 347284, | 2470.8476, | 23295,   | 342992, | 2468.4944, | 23333,   | 346322, | 2466.1412, |
| 6.174742 |         |            | 6.168861 |         |            | 6.162980 |         |            |
| 23258,   | 346940, | 2470.7857, | 23296,   | 343656, | 2468.4325, | 23334,   | 346652, | 2466.0793, |
| 6.174587 |         |            | 6.168706 |         |            | 6.162825 |         |            |
| 23259,   | 346090, | 2470.7238, | 23297,   | 344328, | 2468.3705, | 23335,   | 346318, | 2466.0173, |
| 6.174432 |         |            | 6.168551 |         |            | 6.162671 |         |            |
| 23260,   | 344974, | 2470.6618, | 23298,   | 344626, | 2468.3086, | 23336,   | 345438, | 2465.9554, |
| 6.174278 |         |            | 6.168397 |         |            | 6.162516 |         |            |
| 23261,   | 344114, | 2470.5999, | 23299,   | 344622, | 2468.2467, | 23337,   | 344620, | 2465.8935, |
| 6.174123 |         |            | 6.168242 |         |            | 6.162361 |         |            |
| 23262,   | 343826, | 2470.5380, | 23300,   | 344608, | 2468.1848, | 23338,   | 344330, | 2465.8315, |
| 6.173968 |         |            | 6.168087 |         |            | 6.162206 |         |            |
| 23263,   | 343900, | 2470.4761, | 23301,   | 344728, | 2468.1228, | 23339,   | 344514, | 2465.7696, |
| 6.173813 |         |            | 6.167932 |         |            | 6.162052 |         |            |
| 23264,   | 343824, | 2470.4141, | 23302,   | 344870, | 2468.0609, | 23340,   | 344780, | 2465.7077, |
| 6.173658 |         |            | 6.167778 |         |            | 6.161897 |         |            |



|          |         |            |          |         |            |          |         |            |
|----------|---------|------------|----------|---------|------------|----------|---------|------------|
| 23341,   | 344930, | 2465.6458, | 23379,   | 348120, | 2463.2925, | 23417,   | 351508, | 2460.9393, |
| 6.161742 |         |            | 6.155861 |         |            | 6.149981 |         |            |
| 23342,   | 345154, | 2465.5838, | 23380,   | 347786, | 2463.2306, | 23418,   | 351304, | 2460.8774, |
| 6.161587 |         |            | 6.155707 |         |            | 6.149826 |         |            |
| 23343,   | 345718, | 2465.5219, | 23381,   | 347824, | 2463.1687, | 23419,   | 351306, | 2460.8155, |
| 6.161433 |         |            | 6.155552 |         |            | 6.149671 |         |            |
| 23344,   | 346484, | 2465.4600, | 23382,   | 348302, | 2463.1068, | 23420,   | 351440, | 2460.7535, |
| 6.161278 |         |            | 6.155397 |         |            | 6.149516 |         |            |
| 23345,   | 346986, | 2465.3981, | 23383,   | 348820, | 2463.0448, | 23421,   | 351296, | 2460.6916, |
| 6.161123 |         |            | 6.155242 |         |            | 6.149362 |         |            |
| 23346,   | 346918, | 2465.3361, | 23384,   | 348978, | 2462.9829, | 23422,   | 350642, | 2460.6297, |
| 6.160968 |         |            | 6.155088 |         |            | 6.149207 |         |            |
| 23347,   | 346490, | 2465.2742, | 23385,   | 348800, | 2462.9210, | 23423,   | 349794, | 2460.5678, |
| 6.160814 |         |            | 6.154933 |         |            | 6.149052 |         |            |
| 23348,   | 346220, | 2465.2123, | 23386,   | 348636, | 2462.8591, | 23424,   | 349336, | 2460.5058, |
| 6.160659 |         |            | 6.154778 |         |            | 6.148897 |         |            |
| 23349,   | 346368, | 2465.1503, | 23387,   | 348696, | 2462.7971, | 23425,   | 349536, | 2460.4439, |
| 6.160504 |         |            | 6.154623 |         |            | 6.148742 |         |            |
| 23350,   | 346700, | 2465.0884, | 23388,   | 348850, | 2462.7352, | 23426,   | 350102, | 2460.3820, |
| 6.160349 |         |            | 6.154469 |         |            | 6.148588 |         |            |
| 23351,   | 346838, | 2465.0265, | 23389,   | 348872, | 2462.6733, | 23427,   | 350504, | 2460.3201, |
| 6.160195 |         |            | 6.154314 |         |            | 6.148433 |         |            |
| 23352,   | 346788, | 2464.9646, | 23390,   | 348840, | 2462.6113, | 23428,   | 350526, | 2460.2581, |
| 6.160040 |         |            | 6.154159 |         |            | 6.148278 |         |            |
| 23353,   | 346968, | 2464.9026, | 23391,   | 349120, | 2462.5494, | 23429,   | 350386, | 2460.1962, |
| 6.159885 |         |            | 6.154004 |         |            | 6.148123 |         |            |
| 23354,   | 347696, | 2464.8407, | 23392,   | 349876, | 2462.4875, | 23430,   | 350394, | 2460.1343, |
| 6.159730 |         |            | 6.153849 |         |            | 6.147969 |         |            |
| 23355,   | 348750, | 2464.7788, | 23393,   | 350756, | 2462.4256, | 23431,   | 350586, | 2460.0723, |
| 6.159576 |         |            | 6.153695 |         |            | 6.147814 |         |            |
| 23356,   | 349506, | 2464.7169, | 23394,   | 351156, | 2462.3636, | 23432,   | 350788, | 2460.0104, |
| 6.159421 |         |            | 6.153540 |         |            | 6.147659 |         |            |
| 23357,   | 349592, | 2464.6549, | 23395,   | 350854, | 2462.3017, | 23433,   | 350948, | 2459.9485, |
| 6.159266 |         |            | 6.153385 |         |            | 6.147504 |         |            |
| 23358,   | 349232, | 2464.5930, | 23396,   | 350274, | 2462.2398, | 23434,   | 351260, | 2459.8866, |
| 6.159111 |         |            | 6.153230 |         |            | 6.147350 |         |            |
| 23359,   | 348958, | 2464.5311, | 23397,   | 350078, | 2462.1779, | 23435,   | 351876, | 2459.8246, |
| 6.158957 |         |            | 6.153076 |         |            | 6.147195 |         |            |
| 23360,   | 348962, | 2464.4692, | 23398,   | 350450, | 2462.1159, | 23436,   | 352562, | 2459.7627, |
| 6.158802 |         |            | 6.152921 |         |            | 6.147040 |         |            |
| 23361,   | 348922, | 2464.4072, | 23399,   | 350930, | 2462.0540, | 23437,   | 352824, | 2459.7008, |
| 6.158647 |         |            | 6.152766 |         |            | 6.146885 |         |            |
| 23362,   | 348436, | 2464.3453, | 23400,   | 350930, | 2461.9921, | 23438,   | 352398, | 2459.6389, |
| 6.158492 |         |            | 6.152611 |         |            | 6.146731 |         |            |
| 23363,   | 347574, | 2464.2834, | 23401,   | 350374, | 2461.9302, | 23439,   | 351620, | 2459.5769, |
| 6.158337 |         |            | 6.152457 |         |            | 6.146576 |         |            |
| 23364,   | 346902, | 2464.2214, | 23402,   | 349746, | 2461.8682, | 23440,   | 351150, | 2459.5150, |
| 6.158183 |         |            | 6.152302 |         |            | 6.146421 |         |            |
| 23365,   | 346876, | 2464.1595, | 23403,   | 349538, | 2461.8063, | 23441,   | 351324, | 2459.4531, |
| 6.158028 |         |            | 6.152147 |         |            | 6.146266 |         |            |
| 23366,   | 347350, | 2464.0976, | 23404,   | 349718, | 2461.7444, | 23442,   | 351834, | 2459.3911, |
| 6.157873 |         |            | 6.151992 |         |            | 6.146112 |         |            |
| 23367,   | 347760, | 2464.0357, | 23405,   | 349806, | 2461.6824, | 23443,   | 352064, | 2459.3292, |
| 6.157718 |         |            | 6.151838 |         |            | 6.145957 |         |            |
| 23368,   | 347746, | 2463.9737, | 23406,   | 349460, | 2461.6205, | 23444,   | 351710, | 2459.2673, |
| 6.157564 |         |            | 6.151683 |         |            | 6.145802 |         |            |
| 23369,   | 347516, | 2463.9118, | 23407,   | 348824, | 2461.5586, | 23445,   | 351056, | 2459.2054, |
| 6.157409 |         |            | 6.151528 |         |            | 6.145647 |         |            |
| 23370,   | 347530, | 2463.8499, | 23408,   | 348334, | 2461.4967, | 23446,   | 350584, | 2459.1434, |
| 6.157254 |         |            | 6.151373 |         |            | 6.145493 |         |            |
| 23371,   | 347916, | 2463.7880, | 23409,   | 348198, | 2461.4347, | 23447,   | 350472, | 2459.0815, |
| 6.157099 |         |            | 6.151219 |         |            | 6.145338 |         |            |
| 23372,   | 348308, | 2463.7260, | 23410,   | 348276, | 2461.3728, | 23448,   | 350504, | 2459.0196, |
| 6.156945 |         |            | 6.151064 |         |            | 6.145183 |         |            |
| 23373,   | 348300, | 2463.6641, | 23411,   | 348372, | 2461.3109, | 23449,   | 350470, | 2458.9577, |
| 6.156790 |         |            | 6.150909 |         |            | 6.145028 |         |            |
| 23374,   | 347936, | 2463.6022, | 23412,   | 348566, | 2461.2490, | 23450,   | 350442, | 2458.8957, |
| 6.156635 |         |            | 6.150754 |         |            | 6.144874 |         |            |
| 23375,   | 347668, | 2463.5402, | 23413,   | 349120, | 2461.1870, | 23451,   | 350658, | 2458.8338, |
| 6.156480 |         |            | 6.150600 |         |            | 6.144719 |         |            |
| 23376,   | 347820, | 2463.4783, | 23414,   | 350066, | 2461.1251, | 23452,   | 351126, | 2458.7719, |
| 6.156326 |         |            | 6.150445 |         |            | 6.144564 |         |            |
| 23377,   | 348212, | 2463.4164, | 23415,   | 351030, | 2461.0632, | 23453,   | 351524, | 2458.7100, |
| 6.156171 |         |            | 6.150290 |         |            | 6.144409 |         |            |
| 23378,   | 348370, | 2463.3545, | 23416,   | 351540, | 2461.0012, | 23454,   | 351540, | 2458.6480, |
| 6.156016 |         |            | 6.150135 |         |            | 6.144255 |         |            |

|          |         |            |          |         |            |          |         |            |
|----------|---------|------------|----------|---------|------------|----------|---------|------------|
| 23455,   | 351298, | 2458.5861, | 23493,   | 354570, | 2456.2329, | 23531,   | 354996, | 2453.8797, |
| 6.144100 |         |            | 6.138219 |         |            | 6.132338 |         |            |
| 23456,   | 351252, | 2458.5242, | 23494,   | 354220, | 2456.1709, | 23532,   | 354512, | 2453.8177, |
| 6.143945 |         |            | 6.138064 |         |            | 6.132183 |         |            |
| 23457,   | 351690, | 2458.4622, | 23495,   | 354306, | 2456.1090, | 23533,   | 354394, | 2453.7558, |
| 6.143790 |         |            | 6.137909 |         |            | 6.132029 |         |            |
| 23458,   | 352406, | 2458.4003, | 23496,   | 354620, | 2456.0471, | 23534,   | 354520, | 2453.6939, |
| 6.143635 |         |            | 6.137755 |         |            | 6.131874 |         |            |
| 23459,   | 352884, | 2458.3384, | 23497,   | 354732, | 2455.9852, | 23535,   | 354552, | 2453.6319, |
| 6.143481 |         |            | 6.137600 |         |            | 6.131719 |         |            |
| 23460,   | 352890, | 2458.2765, | 23498,   | 354536, | 2455.9232, | 23536,   | 354456, | 2453.5700, |
| 6.143326 |         |            | 6.137445 |         |            | 6.131564 |         |            |
| 23461,   | 352710, | 2458.2145, | 23499,   | 354370, | 2455.8613, | 23537,   | 354586, | 2453.5081, |
| 6.143171 |         |            | 6.137290 |         |            | 6.131410 |         |            |
| 23462,   | 352810, | 2458.1526, | 23500,   | 354586, | 2455.7994, | 23538,   | 355222, | 2453.4462, |
| 6.143016 |         |            | 6.137136 |         |            | 6.131255 |         |            |
| 23463,   | 353300, | 2458.0907, | 23501,   | 355072, | 2455.7375, | 23539,   | 356142, | 2453.3842, |
| 6.142862 |         |            | 6.136981 |         |            | 6.131100 |         |            |
| 23464,   | 353826, | 2458.0288, | 23502,   | 355332, | 2455.6755, | 23540,   | 356804, | 2453.3223, |
| 6.142707 |         |            | 6.136826 |         |            | 6.130945 |         |            |
| 23465,   | 353990, | 2457.9668, | 23503,   | 355048, | 2455.6136, | 23541,   | 356936, | 2453.2604, |
| 6.142552 |         |            | 6.136671 |         |            | 6.130791 |         |            |
| 23466,   | 353760, | 2457.9049, | 23504,   | 354418, | 2455.5517, | 23542,   | 356908, | 2453.1985, |
| 6.142397 |         |            | 6.136517 |         |            | 6.130636 |         |            |
| 23467,   | 353450, | 2457.8430, | 23505,   | 353944, | 2455.4898, | 23543,   | 357336, | 2453.1365, |
| 6.142243 |         |            | 6.136362 |         |            | 6.130481 |         |            |
| 23468,   | 353266, | 2457.7810, | 23506,   | 353816, | 2455.4278, | 23544,   | 358366, | 2453.0746, |
| 6.142088 |         |            | 6.136207 |         |            | 6.130326 |         |            |
| 23469,   | 353100, | 2457.7191, | 23507,   | 353738, | 2455.3659, | 23545,   | 359420, | 2453.0127, |
| 6.141933 |         |            | 6.136052 |         |            | 6.130172 |         |            |
| 23470,   | 352776, | 2457.6572, | 23508,   | 353334, | 2455.3040, | 23546,   | 359766, | 2452.9507, |
| 6.141778 |         |            | 6.135898 |         |            | 6.130017 |         |            |
| 23471,   | 352456, | 2457.5953, | 23509,   | 352714, | 2455.2420, | 23547,   | 359234, | 2452.8888, |
| 6.141624 |         |            | 6.135743 |         |            | 6.129862 |         |            |
| 23472,   | 352610, | 2457.5333, | 23510,   | 352426, | 2455.1801, | 23548,   | 358354, | 2452.8269, |
| 6.141469 |         |            | 6.135588 |         |            | 6.129707 |         |            |
| 23473,   | 353522, | 2457.4714, | 23511,   | 352834, | 2455.1182, | 23549,   | 357750, | 2452.7650, |
| 6.141314 |         |            | 6.135433 |         |            | 6.129553 |         |            |
| 23474,   | 354842, | 2457.4095, | 23512,   | 353604, | 2455.0563, | 23550,   | 357534, | 2452.7030, |
| 6.141159 |         |            | 6.135279 |         |            | 6.129398 |         |            |
| 23475,   | 355804, | 2457.3476, | 23513,   | 353996, | 2454.9943, | 23551,   | 357340, | 2452.6411, |
| 6.141005 |         |            | 6.135124 |         |            | 6.129243 |         |            |
| 23476,   | 355892, | 2457.2856, | 23514,   | 353602, | 2454.9324, | 23552,   | 356912, | 2452.5792, |
| 6.140850 |         |            | 6.134969 |         |            | 6.129088 |         |            |
| 23477,   | 355316, | 2457.2237, | 23515,   | 352812, | 2454.8705, | 23553,   | 356488, | 2452.5173, |
| 6.140695 |         |            | 6.134814 |         |            | 6.128934 |         |            |
| 23478,   | 354738, | 2457.1618, | 23516,   | 352390, | 2454.8086, | 23554,   | 356534, | 2452.4553, |
| 6.140540 |         |            | 6.134660 |         |            | 6.128779 |         |            |
| 23479,   | 354588, | 2457.0999, | 23517,   | 352722, | 2454.7466, | 23555,   | 357166, | 2452.3934, |
| 6.140386 |         |            | 6.134505 |         |            | 6.128624 |         |            |
| 23480,   | 354702, | 2457.0379, | 23518,   | 353458, | 2454.6847, | 23556,   | 357986, | 2452.3315, |
| 6.140231 |         |            | 6.134350 |         |            | 6.128469 |         |            |
| 23481,   | 354638, | 2456.9760, | 23519,   | 353982, | 2454.6228, | 23557,   | 358556, | 2452.2696, |
| 6.140076 |         |            | 6.134195 |         |            | 6.128314 |         |            |
| 23482,   | 354248, | 2456.9141, | 23520,   | 354080, | 2454.5608, | 23558,   | 358894, | 2452.2076, |
| 6.139921 |         |            | 6.134041 |         |            | 6.128160 |         |            |
| 23483,   | 353822, | 2456.8521, | 23521,   | 354086, | 2454.4989, | 23559,   | 359376, | 2452.1457, |
| 6.139767 |         |            | 6.133886 |         |            | 6.128005 |         |            |
| 23484,   | 353712, | 2456.7902, | 23522,   | 354362, | 2454.4370, | 23560,   | 360160, | 2452.0838, |
| 6.139612 |         |            | 6.133731 |         |            | 6.127850 |         |            |
| 23485,   | 353902, | 2456.7283, | 23523,   | 354836, | 2454.3751, | 23561,   | 360802, | 2452.0218, |
| 6.139457 |         |            | 6.133576 |         |            | 6.127695 |         |            |
| 23486,   | 354072, | 2456.6664, | 23524,   | 355108, | 2454.3131, | 23562,   | 360630, | 2451.9599, |
| 6.139302 |         |            | 6.133421 |         |            | 6.127541 |         |            |
| 23487,   | 354050, | 2456.6044, | 23525,   | 354970, | 2454.2512, | 23563,   | 359498, | 2451.8980, |
| 6.139148 |         |            | 6.133267 |         |            | 6.127386 |         |            |
| 23488,   | 354028, | 2456.5425, | 23526,   | 354720, | 2454.1893, | 23564,   | 358060, | 2451.8361, |
| 6.138993 |         |            | 6.133112 |         |            | 6.127231 |         |            |
| 23489,   | 354300, | 2456.4806, | 23527,   | 354788, | 2454.1274, | 23565,   | 357228, | 2451.7741, |
| 6.138838 |         |            | 6.132957 |         |            | 6.127076 |         |            |
| 23490,   | 354830, | 2456.4187, | 23528,   | 355234, | 2454.0654, | 23566,   | 357350, | 2451.7122, |
| 6.138683 |         |            | 6.132802 |         |            | 6.126922 |         |            |
| 23491,   | 355196, | 2456.3567, | 23529,   | 355620, | 2454.0035, | 23567,   | 357978, | 2451.6503, |
| 6.138528 |         |            | 6.132648 |         |            | 6.126767 |         |            |
| 23492,   | 355060, | 2456.2948, | 23530,   | 355520, | 2453.9416, | 23568,   | 358404, | 2451.5884, |
| 6.138374 |         |            | 6.132493 |         |            | 6.126612 |         |            |

|          |         |            |          |         |            |          |         |            |
|----------|---------|------------|----------|---------|------------|----------|---------|------------|
| 23569,   | 358378, | 2451.5264, | 23607,   | 359754, | 2449.1732, | 23645,   | 355446, | 2446.8200, |
| 6.126457 |         |            | 6.120577 |         |            | 6.114696 |         |            |
| 23570,   | 358154, | 2451.4645, | 23608,   | 359500, | 2449.1113, | 23646,   | 356660, | 2446.7581, |
| 6.126303 |         |            | 6.120422 |         |            | 6.114541 |         |            |
| 23571,   | 358060, | 2451.4026, | 23609,   | 359232, | 2449.0494, | 23647,   | 357820, | 2446.6961, |
| 6.126148 |         |            | 6.120267 |         |            | 6.114386 |         |            |
| 23572,   | 358036, | 2451.3406, | 23610,   | 358774, | 2448.9874, | 23648,   | 358186, | 2446.6342, |
| 6.125993 |         |            | 6.120112 |         |            | 6.114232 |         |            |
| 23573,   | 357832, | 2451.2787, | 23611,   | 358058, | 2448.9255, | 23649,   | 357510, | 2446.5723, |
| 6.125838 |         |            | 6.119958 |         |            | 6.114077 |         |            |
| 23574,   | 357448, | 2451.2168, | 23612,   | 357408, | 2448.8636, | 23650,   | 356400, | 2446.5104, |
| 6.125684 |         |            | 6.119803 |         |            | 6.113922 |         |            |
| 23575,   | 357294, | 2451.1549, | 23613,   | 357310, | 2448.8016, | 23651,   | 355854, | 2446.4484, |
| 6.125529 |         |            | 6.119648 |         |            | 6.113767 |         |            |
| 23576,   | 357710, | 2451.0929, | 23614,   | 357946, | 2448.7397, | 23652,   | 356344, | 2446.3865, |
| 6.125374 |         |            | 6.119493 |         |            | 6.113613 |         |            |
| 23577,   | 358492, | 2451.0310, | 23615,   | 358928, | 2448.6778, | 23653,   | 357438, | 2446.3246, |
| 6.125219 |         |            | 6.119339 |         |            | 6.113458 |         |            |
| 23578,   | 358952, | 2450.9691, | 23616,   | 359676, | 2448.6159, | 23654,   | 358370, | 2446.2626, |
| 6.125065 |         |            | 6.119184 |         |            | 6.113303 |         |            |
| 23579,   | 358552, | 2450.9072, | 23617,   | 359998, | 2448.5539, | 23655,   | 358834, | 2446.2007, |
| 6.124910 |         |            | 6.119029 |         |            | 6.113148 |         |            |
| 23580,   | 357446, | 2450.8452, | 23618,   | 360240, | 2448.4920, | 23656,   | 359206, | 2446.1388, |
| 6.124755 |         |            | 6.118874 |         |            | 6.112993 |         |            |
| 23581,   | 356364, | 2450.7833, | 23619,   | 360838, | 2448.4301, | 23657,   | 359914, | 2446.0769, |
| 6.124600 |         |            | 6.118720 |         |            | 6.112839 |         |            |
| 23582,   | 355946, | 2450.7214, | 23620,   | 361782, | 2448.3682, | 23658,   | 360766, | 2446.0149, |
| 6.124446 |         |            | 6.118565 |         |            | 6.112684 |         |            |
| 23583,   | 356276, | 2450.6595, | 23621,   | 362598, | 2448.3062, | 23659,   | 361060, | 2445.9530, |
| 6.124291 |         |            | 6.118410 |         |            | 6.112529 |         |            |
| 23584,   | 356970, | 2450.5975, | 23622,   | 362872, | 2448.2443, | 23660,   | 360370, | 2445.8911, |
| 6.124136 |         |            | 6.118255 |         |            | 6.112374 |         |            |
| 23585,   | 357692, | 2450.5356, | 23623,   | 362688, | 2448.1824, | 23661,   | 359116, | 2445.8292, |
| 6.123981 |         |            | 6.118100 |         |            | 6.112220 |         |            |
| 23586,   | 358356, | 2450.4737, | 23624,   | 362476, | 2448.1205, | 23662,   | 358206, | 2445.7672, |
| 6.123827 |         |            | 6.117946 |         |            | 6.112065 |         |            |
| 23587,   | 358958, | 2450.4117, | 23625,   | 362460, | 2448.0585, | 23663,   | 358154, | 2445.7053, |
| 6.123672 |         |            | 6.117791 |         |            | 6.111910 |         |            |
| 23588,   | 359332, | 2450.3498, | 23626,   | 362404, | 2447.9966, | 23664,   | 358612, | 2445.6434, |
| 6.123517 |         |            | 6.117636 |         |            | 6.111755 |         |            |
| 23589,   | 359236, | 2450.2879, | 23627,   | 361928, | 2447.9347, | 23665,   | 358842, | 2445.5814, |
| 6.123362 |         |            | 6.117481 |         |            | 6.111601 |         |            |
| 23590,   | 358658, | 2450.2260, | 23628,   | 361004, | 2447.8727, | 23666,   | 358560, | 2445.5195, |
| 6.123207 |         |            | 6.117327 |         |            | 6.111446 |         |            |
| 23591,   | 357974, | 2450.1640, | 23629,   | 360066, | 2447.8108, | 23667,   | 358174, | 2445.4576, |
| 6.123053 |         |            | 6.117172 |         |            | 6.111291 |         |            |
| 23592,   | 357604, | 2450.1021, | 23630,   | 359496, | 2447.7489, | 23668,   | 358254, | 2445.3957, |
| 6.122898 |         |            | 6.117017 |         |            | 6.111136 |         |            |
| 23593,   | 357628, | 2450.0402, | 23631,   | 359212, | 2447.6870, | 23669,   | 358872, | 2445.3337, |
| 6.122743 |         |            | 6.116862 |         |            | 6.110982 |         |            |
| 23594,   | 357746, | 2449.9783, | 23632,   | 358730, | 2447.6250, | 23670,   | 359582, | 2445.2718, |
| 6.122588 |         |            | 6.116708 |         |            | 6.110827 |         |            |
| 23595,   | 357684, | 2449.9163, | 23633,   | 357788, | 2447.5631, | 23671,   | 360020, | 2445.2099, |
| 6.122434 |         |            | 6.116553 |         |            | 6.110672 |         |            |
| 23596,   | 357560, | 2449.8544, | 23634,   | 356646, | 2447.5012, | 23672,   | 360322, | 2445.1480, |
| 6.122279 |         |            | 6.116398 |         |            | 6.110517 |         |            |
| 23597,   | 357728, | 2449.7925, | 23635,   | 355844, | 2447.4393, | 23673,   | 360870, | 2445.0860, |
| 6.122124 |         |            | 6.116243 |         |            | 6.110363 |         |            |
| 23598,   | 358364, | 2449.7305, | 23636,   | 355584, | 2447.3773, | 23674,   | 361708, | 2445.0241, |
| 6.121969 |         |            | 6.116089 |         |            | 6.110208 |         |            |
| 23599,   | 359168, | 2449.6686, | 23637,   | 355556, | 2447.3154, | 23675,   | 362364, | 2444.9622, |
| 6.121815 |         |            | 6.115934 |         |            | 6.110053 |         |            |
| 23600,   | 359660, | 2449.6067, | 23638,   | 355308, | 2447.2535, | 23676,   | 362382, | 2444.9003, |
| 6.121660 |         |            | 6.115779 |         |            | 6.109898 |         |            |
| 23601,   | 359674, | 2449.5448, | 23639,   | 354748, | 2447.1915, | 23677,   | 361890, | 2444.8383, |
| 6.121505 |         |            | 6.115624 |         |            | 6.109744 |         |            |
| 23602,   | 359480, | 2449.4828, | 23640,   | 354196, | 2447.1296, | 23678,   | 361516, | 2444.7764, |
| 6.121350 |         |            | 6.115470 |         |            | 6.109589 |         |            |
| 23603,   | 359480, | 2449.4209, | 23641,   | 353970, | 2447.0677, | 23679,   | 361714, | 2444.7145, |
| 6.121196 |         |            | 6.115315 |         |            | 6.109434 |         |            |
| 23604,   | 359734, | 2449.3590, | 23642,   | 354064, | 2447.0058, | 23680,   | 362228, | 2444.6525, |
| 6.121041 |         |            | 6.115160 |         |            | 6.109279 |         |            |
| 23605,   | 359984, | 2449.2971, | 23643,   | 354288, | 2446.9438, | 23681,   | 362402, | 2444.5906, |
| 6.120886 |         |            | 6.115005 |         |            | 6.109125 |         |            |
| 23606,   | 359976, | 2449.2351, | 23644,   | 354668, | 2446.8819, | 23682,   | 361918, | 2444.5287, |
| 6.120731 |         |            | 6.114851 |         |            | 6.108970 |         |            |

|          |         |            |          |         |            |          |         |            |
|----------|---------|------------|----------|---------|------------|----------|---------|------------|
| 23683,   | 361168, | 2444.4668, | 23721,   | 363316, | 2442.1135, | 23759,   | 364290, | 2439.7603, |
| 6.108815 |         |            | 6.102934 |         |            | 6.097053 |         |            |
| 23684,   | 360806, | 2444.4048, | 23722,   | 363428, | 2442.0516, | 23760,   | 364614, | 2439.6984, |
| 6.108660 |         |            | 6.102779 |         |            | 6.096899 |         |            |
| 23685,   | 361024, | 2444.3429, | 23723,   | 364218, | 2441.9897, | 23761,   | 365192, | 2439.6365, |
| 6.108505 |         |            | 6.102625 |         |            | 6.096744 |         |            |
| 23686,   | 361368, | 2444.2810, | 23724,   | 365020, | 2441.9278, | 23762,   | 365416, | 2439.5745, |
| 6.108351 |         |            | 6.102470 |         |            | 6.096589 |         |            |
| 23687,   | 361308, | 2444.2191, | 23725,   | 365172, | 2441.8658, | 23763,   | 364914, | 2439.5126, |
| 6.108196 |         |            | 6.102315 |         |            | 6.096434 |         |            |
| 23688,   | 360888, | 2444.1571, | 23726,   | 364638, | 2441.8039, | 23764,   | 364102, | 2439.4507, |
| 6.108041 |         |            | 6.102160 |         |            | 6.096280 |         |            |
| 23689,   | 360644, | 2444.0952, | 23727,   | 363930, | 2441.7420, | 23765,   | 363822, | 2439.3888, |
| 6.107886 |         |            | 6.102006 |         |            | 6.096125 |         |            |
| 23690,   | 360966, | 2444.0333, | 23728,   | 363436, | 2441.6801, | 23766,   | 364482, | 2439.3268, |
| 6.107732 |         |            | 6.101851 |         |            | 6.095970 |         |            |
| 23691,   | 361652, | 2443.9713, | 23729,   | 363026, | 2441.6181, | 23767,   | 365602, | 2439.2649, |
| 6.107577 |         |            | 6.101696 |         |            | 6.095815 |         |            |
| 23692,   | 362158, | 2443.9094, | 23730,   | 362390, | 2441.5562, | 23768,   | 366326, | 2439.2030, |
| 6.107422 |         |            | 6.101541 |         |            | 6.095661 |         |            |
| 23693,   | 362252, | 2443.8475, | 23731,   | 361600, | 2441.4943, | 23769,   | 366322, | 2439.1410, |
| 6.107267 |         |            | 6.101387 |         |            | 6.095506 |         |            |
| 23694,   | 362296, | 2443.7856, | 23732,   | 361178, | 2441.4323, | 23770,   | 366056, | 2439.0791, |
| 6.107113 |         |            | 6.101232 |         |            | 6.095351 |         |            |
| 23695,   | 362784, | 2443.7236, | 23733,   | 361526, | 2441.3704, | 23771,   | 366240, | 2439.0172, |
| 6.106958 |         |            | 6.101077 |         |            | 6.095196 |         |            |
| 23696,   | 363740, | 2443.6617, | 23734,   | 362444, | 2441.3085, | 23772,   | 366998, | 2438.9553, |
| 6.106803 |         |            | 6.100922 |         |            | 6.095042 |         |            |
| 23697,   | 364670, | 2443.5998, | 23735,   | 363314, | 2441.2466, | 23773,   | 367794, | 2438.8933, |
| 6.106648 |         |            | 6.100768 |         |            | 6.094887 |         |            |
| 23698,   | 365066, | 2443.5379, | 23736,   | 363792, | 2441.1846, | 23774,   | 368042, | 2438.8314, |
| 6.106494 |         |            | 6.100613 |         |            | 6.094732 |         |            |
| 23699,   | 364932, | 2443.4759, | 23737,   | 364136, | 2441.1227, | 23775,   | 367746, | 2438.7695, |
| 6.106339 |         |            | 6.100458 |         |            | 6.094577 |         |            |
| 23700,   | 364656, | 2443.4140, | 23738,   | 364806, | 2441.0608, | 23776,   | 367390, | 2438.7076, |
| 6.106184 |         |            | 6.100303 |         |            | 6.094423 |         |            |
| 23701,   | 364472, | 2443.3521, | 23739,   | 365762, | 2440.9989, | 23777,   | 367334, | 2438.6456, |
| 6.106029 |         |            | 6.100149 |         |            | 6.094268 |         |            |
| 23702,   | 364202, | 2443.2902, | 23740,   | 366396, | 2440.9369, | 23778,   | 367418, | 2438.5837, |
| 6.105875 |         |            | 6.099994 |         |            | 6.094113 |         |            |
| 23703,   | 363562, | 2443.2282, | 23741,   | 366172, | 2440.8750, | 23779,   | 367264, | 2438.5218, |
| 6.105720 |         |            | 6.099839 |         |            | 6.093958 |         |            |
| 23704,   | 362644, | 2443.1663, | 23742,   | 365314, | 2440.8131, | 23780,   | 366824, | 2438.4599, |
| 6.105565 |         |            | 6.099684 |         |            | 6.093804 |         |            |
| 23705,   | 361956, | 2443.1044, | 23743,   | 364638, | 2440.7511, | 23781,   | 366462, | 2438.3979, |
| 6.105410 |         |            | 6.099530 |         |            | 6.093649 |         |            |
| 23706,   | 361940, | 2443.0424, | 23744,   | 364714, | 2440.6892, | 23782,   | 366514, | 2438.3360, |
| 6.105256 |         |            | 6.099375 |         |            | 6.093494 |         |            |
| 23707,   | 362526, | 2442.9805, | 23745,   | 365274, | 2440.6273, | 23783,   | 366816, | 2438.2741, |
| 6.105101 |         |            | 6.099220 |         |            | 6.093339 |         |            |
| 23708,   | 363274, | 2442.9186, | 23746,   | 365544, | 2440.5654, | 23784,   | 366824, | 2438.2121, |
| 6.104946 |         |            | 6.099065 |         |            | 6.093184 |         |            |
| 23709,   | 363852, | 2442.8567, | 23747,   | 365134, | 2440.5034, | 23785,   | 366236, | 2438.1502, |
| 6.104791 |         |            | 6.098911 |         |            | 6.093030 |         |            |
| 23710,   | 364296, | 2442.7947, | 23748,   | 364474, | 2440.4415, | 23786,   | 365324, | 2438.0883, |
| 6.104637 |         |            | 6.098756 |         |            | 6.092875 |         |            |
| 23711,   | 364726, | 2442.7328, | 23749,   | 364304, | 2440.3796, | 23787,   | 364694, | 2438.0264, |
| 6.104482 |         |            | 6.098601 |         |            | 6.092720 |         |            |
| 23712,   | 364970, | 2442.6709, | 23750,   | 364818, | 2440.3177, | 23788,   | 364696, | 2437.9644, |
| 6.104327 |         |            | 6.098446 |         |            | 6.092565 |         |            |
| 23713,   | 364646, | 2442.6090, | 23751,   | 365446, | 2440.2557, | 23789,   | 365202, | 2437.9025, |
| 6.104172 |         |            | 6.098291 |         |            | 6.092411 |         |            |
| 23714,   | 363688, | 2442.5470, | 23752,   | 365512, | 2440.1938, | 23790,   | 365888, | 2437.8406, |
| 6.104018 |         |            | 6.098137 |         |            | 6.092256 |         |            |
| 23715,   | 362658, | 2442.4851, | 23753,   | 364948, | 2440.1319, | 23791,   | 366598, | 2437.7787, |
| 6.103863 |         |            | 6.097982 |         |            | 6.092101 |         |            |
| 23716,   | 362322, | 2442.4232, | 23754,   | 364334, | 2440.0700, | 23792,   | 367354, | 2437.7167, |
| 6.103708 |         |            | 6.097827 |         |            | 6.091946 |         |            |
| 23717,   | 362906, | 2442.3612, | 23755,   | 364180, | 2440.0080, | 23793,   | 368038, | 2437.6548, |
| 6.103553 |         |            | 6.097672 |         |            | 6.091792 |         |            |
| 23718,   | 363806, | 2442.2993, | 23756,   | 364406, | 2439.9461, | 23794,   | 368316, | 2437.5929, |
| 6.103398 |         |            | 6.097518 |         |            | 6.091637 |         |            |
| 23719,   | 364178, | 2442.2374, | 23757,   | 364538, | 2439.8842, | 23795,   | 367970, | 2437.5309, |
| 6.103244 |         |            | 6.097363 |         |            | 6.091482 |         |            |
| 23720,   | 363812, | 2442.1755, | 23758,   | 364390, | 2439.8222, | 23796,   | 367302, | 2437.4690, |
| 6.103089 |         |            | 6.097208 |         |            | 6.091327 |         |            |

|          |         |            |          |         |            |          |         |            |
|----------|---------|------------|----------|---------|------------|----------|---------|------------|
| 23797,   | 366984, | 2437.4071, | 23835,   | 369490, | 2435.0539, | 23873,   | 370928, | 2432.7007, |
| 6.091173 |         |            | 6.085292 |         |            | 6.079411 |         |            |
| 23798,   | 367412, | 2437.3452, | 23836,   | 369498, | 2434.9919, | 23874,   | 371110, | 2432.6387, |
| 6.091018 |         |            | 6.085137 |         |            | 6.079256 |         |            |
| 23799,   | 368268, | 2437.2832, | 23837,   | 369880, | 2434.9300, | 23875,   | 371556, | 2432.5768, |
| 6.090863 |         |            | 6.084982 |         |            | 6.079102 |         |            |
| 23800,   | 368786, | 2437.2213, | 23838,   | 370114, | 2434.8681, | 23876,   | 371710, | 2432.5149, |
| 6.090708 |         |            | 6.084828 |         |            | 6.078947 |         |            |
| 23801,   | 368562, | 2437.1594, | 23839,   | 369824, | 2434.8062, | 23877,   | 371424, | 2432.4529, |
| 6.090554 |         |            | 6.084673 |         |            | 6.078792 |         |            |
| 23802,   | 367974, | 2437.0975, | 23840,   | 369138, | 2434.7442, | 23878,   | 371144, | 2432.3910, |
| 6.090399 |         |            | 6.084518 |         |            | 6.078637 |         |            |
| 23803,   | 367798, | 2437.0355, | 23841,   | 368464, | 2434.6823, | 23879,   | 371344, | 2432.3291, |
| 6.090244 |         |            | 6.084363 |         |            | 6.078483 |         |            |
| 23804,   | 368372, | 2436.9736, | 23842,   | 368004, | 2434.6204, | 23880,   | 371916, | 2432.2672, |
| 6.090089 |         |            | 6.084209 |         |            | 6.078328 |         |            |
| 23805,   | 369282, | 2436.9117, | 23843,   | 367610, | 2434.5585, | 23881,   | 372240, | 2432.2052, |
| 6.089935 |         |            | 6.084054 |         |            | 6.078173 |         |            |
| 23806,   | 369818, | 2436.8498, | 23844,   | 367144, | 2434.4965, | 23882,   | 371870, | 2432.1433, |
| 6.089780 |         |            | 6.083899 |         |            | 6.078018 |         |            |
| 23807,   | 369728, | 2436.7878, | 23845,   | 366818, | 2434.4346, | 23883,   | 371020, | 2432.0814, |
| 6.089625 |         |            | 6.083744 |         |            | 6.077863 |         |            |
| 23808,   | 369410, | 2436.7259, | 23846,   | 367100, | 2434.3727, | 23884,   | 370288, | 2432.0195, |
| 6.089470 |         |            | 6.083590 |         |            | 6.077709 |         |            |
| 23809,   | 369340, | 2436.6640, | 23847,   | 368172, | 2434.3108, | 23885,   | 369954, | 2431.9575, |
| 6.089316 |         |            | 6.083435 |         |            | 6.077554 |         |            |
| 23810,   | 369542, | 2436.6020, | 23848,   | 369660, | 2434.2488, | 23886,   | 369704, | 2431.8956, |
| 6.089161 |         |            | 6.083280 |         |            | 6.077399 |         |            |
| 23811,   | 369598, | 2436.5401, | 23849,   | 370918, | 2434.1869, | 23887,   | 369118, | 2431.8337, |
| 6.089006 |         |            | 6.083125 |         |            | 6.077244 |         |            |
| 23812,   | 369248, | 2436.4782, | 23850,   | 371600, | 2434.1250, | 23888,   | 368296, | 2431.7717, |
| 6.088851 |         |            | 6.082970 |         |            | 6.077090 |         |            |
| 23813,   | 368752, | 2436.4163, | 23851,   | 371856, | 2434.0630, | 23889,   | 367876, | 2431.7098, |
| 6.088697 |         |            | 6.082816 |         |            | 6.076935 |         |            |
| 23814,   | 368628, | 2436.3543, | 23852,   | 371980, | 2434.0011, | 23890,   | 368332, | 2431.6479, |
| 6.088542 |         |            | 6.082661 |         |            | 6.076780 |         |            |
| 23815,   | 369084, | 2436.2924, | 23853,   | 372000, | 2433.9392, | 23891,   | 369410, | 2431.5860, |
| 6.088387 |         |            | 6.082506 |         |            | 6.076625 |         |            |
| 23816,   | 369782, | 2436.2305, | 23854,   | 371696, | 2433.8773, | 23892,   | 370384, | 2431.5240, |
| 6.088232 |         |            | 6.082351 |         |            | 6.076471 |         |            |
| 23817,   | 370230, | 2436.1686, | 23855,   | 371026, | 2433.8153, | 23893,   | 370870, | 2431.4621, |
| 6.088077 |         |            | 6.082197 |         |            | 6.076316 |         |            |
| 23818,   | 370272, | 2436.1066, | 23856,   | 370332, | 2433.7534, | 23894,   | 371226, | 2431.4002, |
| 6.087923 |         |            | 6.082042 |         |            | 6.076161 |         |            |
| 23819,   | 370142, | 2436.0447, | 23857,   | 370048, | 2433.6915, | 23895,   | 372070, | 2431.3383, |
| 6.087768 |         |            | 6.081887 |         |            | 6.076006 |         |            |
| 23820,   | 370080, | 2435.9828, | 23858,   | 370222, | 2433.6296, | 23896,   | 373452, | 2431.2763, |
| 6.087613 |         |            | 6.081732 |         |            | 6.075852 |         |            |
| 23821,   | 369992, | 2435.9208, | 23859,   | 370430, | 2433.5676, | 23897,   | 374642, | 2431.2144, |
| 6.087458 |         |            | 6.081578 |         |            | 6.075697 |         |            |
| 23822,   | 369668, | 2435.8589, | 23860,   | 370260, | 2433.5057, | 23898,   | 374840, | 2431.1525, |
| 6.087304 |         |            | 6.081423 |         |            | 6.075542 |         |            |
| 23823,   | 369138, | 2435.7970, | 23861,   | 369790, | 2433.4438, | 23899,   | 374036, | 2431.0906, |
| 6.087149 |         |            | 6.081268 |         |            | 6.075387 |         |            |
| 23824,   | 368786, | 2435.7351, | 23862,   | 369502, | 2433.3818, | 23900,   | 373004, | 2431.0286, |
| 6.086994 |         |            | 6.081113 |         |            | 6.075233 |         |            |
| 23825,   | 368916, | 2435.6731, | 23863,   | 369712, | 2433.3199, | 23901,   | 372512, | 2430.9667, |
| 6.086839 |         |            | 6.080959 |         |            | 6.075078 |         |            |
| 23826,   | 369380, | 2435.6112, | 23864,   | 370188, | 2433.2580, | 23902,   | 372584, | 2430.9048, |
| 6.086685 |         |            | 6.080804 |         |            | 6.074923 |         |            |
| 23827,   | 369692, | 2435.5493, | 23865,   | 370438, | 2433.1961, | 23903,   | 372672, | 2430.8428, |
| 6.086530 |         |            | 6.080649 |         |            | 6.074768 |         |            |
| 23828,   | 369576, | 2435.4874, | 23866,   | 370318, | 2433.1341, | 23904,   | 372404, | 2430.7809, |
| 6.086375 |         |            | 6.080494 |         |            | 6.074614 |         |            |
| 23829,   | 369286, | 2435.4254, | 23867,   | 370212, | 2433.0722, | 23905,   | 372060, | 2430.7190, |
| 6.086220 |         |            | 6.080340 |         |            | 6.074459 |         |            |
| 23830,   | 369310, | 2435.3635, | 23868,   | 370576, | 2433.0103, | 23906,   | 372168, | 2430.6571, |
| 6.086066 |         |            | 6.080185 |         |            | 6.074304 |         |            |
| 23831,   | 369788, | 2435.3016, | 23869,   | 371340, | 2432.9484, | 23907,   | 372768, | 2430.5951, |
| 6.085911 |         |            | 6.080030 |         |            | 6.074149 |         |            |
| 23832,   | 370310, | 2435.2397, | 23870,   | 371916, | 2432.8864, | 23908,   | 373326, | 2430.5332, |
| 6.085756 |         |            | 6.079875 |         |            | 6.073995 |         |            |
| 23833,   | 370366, | 2435.1777, | 23871,   | 371838, | 2432.8245, | 23909,   | 373314, | 2430.4713, |
| 6.085601 |         |            | 6.079721 |         |            | 6.073840 |         |            |
| 23834,   | 369930, | 2435.1158, | 23872,   | 371294, | 2432.7626, | 23910,   | 372912, | 2430.4094, |
| 6.085447 |         |            | 6.079566 |         |            | 6.073685 |         |            |

|          |         |            |          |         |            |          |         |            |
|----------|---------|------------|----------|---------|------------|----------|---------|------------|
| 23911,   | 372832, | 2430.3474, | 23949,   | 374424, | 2427.9942, | 23987,   | 376498, | 2425.6410, |
| 6.073530 |         |            | 6.067649 |         |            | 6.061769 |         |            |
| 23912,   | 373494, | 2430.2855, | 23950,   | 374054, | 2427.9323, | 23988,   | 376514, | 2425.5791, |
| 6.073376 |         |            | 6.067495 |         |            | 6.061614 |         |            |
| 23913,   | 374508, | 2430.2236, | 23951,   | 373940, | 2427.8704, | 23989,   | 376608, | 2425.5171, |
| 6.073221 |         |            | 6.067340 |         |            | 6.061459 |         |            |
| 23914,   | 375044, | 2430.1616, | 23952,   | 373762, | 2427.8084, | 23990,   | 376260, | 2425.4552, |
| 6.073066 |         |            | 6.067185 |         |            | 6.061304 |         |            |
| 23915,   | 374754, | 2430.0997, | 23953,   | 373340, | 2427.7465, | 23991,   | 375554, | 2425.3933, |
| 6.072911 |         |            | 6.067030 |         |            | 6.061150 |         |            |
| 23916,   | 374144, | 2430.0378, | 23954,   | 372912, | 2427.6846, | 23992,   | 375126, | 2425.3313, |
| 6.072756 |         |            | 6.066876 |         |            | 6.060995 |         |            |
| 23917,   | 374000, | 2429.9759, | 23955,   | 372872, | 2427.6226, | 23993,   | 375444, | 2425.2694, |
| 6.072602 |         |            | 6.066721 |         |            | 6.060840 |         |            |
| 23918,   | 374500, | 2429.9139, | 23956,   | 373318, | 2427.5607, | 23994,   | 376242, | 2425.2075, |
| 6.072447 |         |            | 6.066566 |         |            | 6.060685 |         |            |
| 23919,   | 375032, | 2429.8520, | 23957,   | 373972, | 2427.4988, | 23995,   | 376824, | 2425.1456, |
| 6.072292 |         |            | 6.066411 |         |            | 6.060531 |         |            |
| 23920,   | 374860, | 2429.7901, | 23958,   | 374506, | 2427.4369, | 23996,   | 376826, | 2425.0836, |
| 6.072137 |         |            | 6.066257 |         |            | 6.060376 |         |            |
| 23921,   | 373940, | 2429.7282, | 23959,   | 374900, | 2427.3749, | 23997,   | 376632, | 2425.0217, |
| 6.071983 |         |            | 6.066102 |         |            | 6.060221 |         |            |
| 23922,   | 372898, | 2429.6662, | 23960,   | 375304, | 2427.3130, | 23998,   | 376922, | 2424.9598, |
| 6.071828 |         |            | 6.065947 |         |            | 6.060066 |         |            |
| 23923,   | 372330, | 2429.6043, | 23961,   | 375688, | 2427.2511, | 23999,   | 377834, | 2424.8979, |
| 6.071673 |         |            | 6.065792 |         |            | 6.059912 |         |            |
| 23924,   | 372218, | 2429.5424, | 23962,   | 375780, | 2427.1892, | 24000,   | 378768, | 2424.8359, |
| 6.071518 |         |            | 6.065638 |         |            | 6.059757 |         |            |
| 23925,   | 372088, | 2429.4805, | 23963,   | 375374, | 2427.1272, | 24001,   | 378994, | 2424.7740, |
| 6.071364 |         |            | 6.065483 |         |            | 6.059602 |         |            |
| 23926,   | 371648, | 2429.4185, | 23964,   | 374694, | 2427.0653, | 24002,   | 378438, | 2424.7121, |
| 6.071209 |         |            | 6.065328 |         |            | 6.059447 |         |            |
| 23927,   | 371126, | 2429.3566, | 23965,   | 374230, | 2427.0034, | 24003,   | 377728, | 2424.6502, |
| 6.071054 |         |            | 6.065173 |         |            | 6.059293 |         |            |
| 23928,   | 370914, | 2429.2947, | 23966,   | 374266, | 2426.9414, | 24004,   | 377504, | 2424.5882, |
| 6.070899 |         |            | 6.065019 |         |            | 6.059138 |         |            |
| 23929,   | 371062, | 2429.2327, | 23967,   | 374572, | 2426.8795, | 24005,   | 377806, | 2424.5263, |
| 6.070745 |         |            | 6.064864 |         |            | 6.058983 |         |            |
| 23930,   | 371250, | 2429.1708, | 23968,   | 374712, | 2426.8176, | 24006,   | 378152, | 2424.4644, |
| 6.070590 |         |            | 6.064709 |         |            | 6.058828 |         |            |
| 23931,   | 371256, | 2429.1089, | 23969,   | 374586, | 2426.7557, | 24007,   | 378198, | 2424.4024, |
| 6.070435 |         |            | 6.064554 |         |            | 6.058674 |         |            |
| 23932,   | 371298, | 2429.0470, | 23970,   | 374604, | 2426.6937, | 24008,   | 378090, | 2424.3405, |
| 6.070280 |         |            | 6.064400 |         |            | 6.058519 |         |            |
| 23933,   | 371784, | 2428.9850, | 23971,   | 375204, | 2426.6318, | 24009,   | 378190, | 2424.2786, |
| 6.070126 |         |            | 6.064245 |         |            | 6.058364 |         |            |
| 23934,   | 372754, | 2428.9231, | 23972,   | 376308, | 2426.5699, | 24010,   | 378496, | 2424.2167, |
| 6.069971 |         |            | 6.064090 |         |            | 6.058209 |         |            |
| 23935,   | 373676, | 2428.8612, | 23973,   | 377318, | 2426.5080, | 24011,   | 378600, | 2424.1547, |
| 6.069816 |         |            | 6.063935 |         |            | 6.058054 |         |            |
| 23936,   | 373992, | 2428.7993, | 23974,   | 377720, | 2426.4460, | 24012,   | 378170, | 2424.0928, |
| 6.069661 |         |            | 6.063781 |         |            | 6.057900 |         |            |
| 23937,   | 373656, | 2428.7373, | 23975,   | 377584, | 2426.3841, | 24013,   | 377416, | 2424.0309, |
| 6.069507 |         |            | 6.063626 |         |            | 6.057745 |         |            |
| 23938,   | 373210, | 2428.6754, | 23976,   | 377418, | 2426.3222, | 24014,   | 376904, | 2423.9690, |
| 6.069352 |         |            | 6.063471 |         |            | 6.057590 |         |            |
| 23939,   | 373116, | 2428.6135, | 23977,   | 377570, | 2426.2603, | 24015,   | 376922, | 2423.9070, |
| 6.069197 |         |            | 6.063316 |         |            | 6.057435 |         |            |
| 23940,   | 373308, | 2428.5515, | 23978,   | 377888, | 2426.1983, | 24016,   | 377174, | 2423.8451, |
| 6.069042 |         |            | 6.063161 |         |            | 6.057281 |         |            |
| 23941,   | 373322, | 2428.4896, | 23979,   | 378006, | 2426.1364, | 24017,   | 377124, | 2423.7832, |
| 6.068888 |         |            | 6.063007 |         |            | 6.057126 |         |            |
| 23942,   | 372966, | 2428.4277, | 23980,   | 377868, | 2426.0745, | 24018,   | 376684, | 2423.7212, |
| 6.068733 |         |            | 6.062852 |         |            | 6.056971 |         |            |
| 23943,   | 372628, | 2428.3658, | 23981,   | 377818, | 2426.0125, | 24019,   | 376354, | 2423.6593, |
| 6.068578 |         |            | 6.062697 |         |            | 6.056816 |         |            |
| 23944,   | 372894, | 2428.3038, | 23982,   | 378126, | 2425.9506, | 24020,   | 376668, | 2423.5974, |
| 6.068423 |         |            | 6.062542 |         |            | 6.056662 |         |            |
| 23945,   | 373842, | 2428.2419, | 23983,   | 378554, | 2425.8887, | 24021,   | 377558, | 2423.5355, |
| 6.068269 |         |            | 6.062388 |         |            | 6.056507 |         |            |
| 23946,   | 374880, | 2428.1800, | 23984,   | 378558, | 2425.8268, | 24022,   | 378388, | 2423.4735, |
| 6.068114 |         |            | 6.062233 |         |            | 6.056352 |         |            |
| 23947,   | 375320, | 2428.1181, | 23985,   | 377912, | 2425.7648, | 24023,   | 378608, | 2423.4116, |
| 6.067959 |         |            | 6.062078 |         |            | 6.056197 |         |            |
| 23948,   | 375016, | 2428.0561, | 23986,   | 377016, | 2425.7029, | 24024,   | 378304, | 2423.3497, |
| 6.067804 |         |            | 6.061923 |         |            | 6.056043 |         |            |

|          |         |            |          |         |            |          |         |            |
|----------|---------|------------|----------|---------|------------|----------|---------|------------|
| 24025,   | 378040, | 2423.2878, | 24063,   | 380262, | 2420.9345, | 24101,   | 381206, | 2418.5813, |
| 6.055888 |         |            | 6.050007 |         |            | 6.044126 |         |            |
| 24026,   | 378218, | 2423.2258, | 24064,   | 380830, | 2420.8726, | 24102,   | 381278, | 2418.5194, |
| 6.055733 |         |            | 6.049852 |         |            | 6.043972 |         |            |
| 24027,   | 378690, | 2423.1639, | 24065,   | 381724, | 2420.8107, | 24103,   | 381440, | 2418.4575, |
| 6.055578 |         |            | 6.049698 |         |            | 6.043817 |         |            |
| 24028,   | 379026, | 2423.1020, | 24066,   | 382420, | 2420.7488, | 24104,   | 381270, | 2418.3955, |
| 6.055424 |         |            | 6.049543 |         |            | 6.043662 |         |            |
| 24029,   | 379030, | 2423.0401, | 24067,   | 382658, | 2420.6868, | 24105,   | 380918, | 2418.3336, |
| 6.055269 |         |            | 6.049388 |         |            | 6.043507 |         |            |
| 24030,   | 378878, | 2422.9781, | 24068,   | 382574, | 2420.6249, | 24106,   | 380912, | 2418.2717, |
| 6.055114 |         |            | 6.049233 |         |            | 6.043353 |         |            |
| 24031,   | 378784, | 2422.9162, | 24069,   | 382388, | 2420.5630, | 24107,   | 381514, | 2418.2098, |
| 6.054959 |         |            | 6.049079 |         |            | 6.043198 |         |            |
| 24032,   | 378678, | 2422.8543, | 24070,   | 382098, | 2420.5011, | 24108,   | 382370, | 2418.1478, |
| 6.054805 |         |            | 6.048924 |         |            | 6.043043 |         |            |
| 24033,   | 378316, | 2422.7923, | 24071,   | 381590, | 2420.4391, | 24109,   | 382912, | 2418.0859, |
| 6.054650 |         |            | 6.048769 |         |            | 6.042888 |         |            |
| 24034,   | 377712, | 2422.7304, | 24072,   | 380916, | 2420.3772, | 24110,   | 383022, | 2418.0240, |
| 6.054495 |         |            | 6.048614 |         |            | 6.042733 |         |            |
| 24035,   | 377276, | 2422.6685, | 24073,   | 380372, | 2420.3153, | 24111,   | 383156, | 2417.9620, |
| 6.054340 |         |            | 6.048460 |         |            | 6.042579 |         |            |
| 24036,   | 377404, | 2422.6066, | 24074,   | 380168, | 2420.2533, | 24112,   | 383756, | 2417.9001, |
| 6.054186 |         |            | 6.048305 |         |            | 6.042424 |         |            |
| 24037,   | 378008, | 2422.5446, | 24075,   | 380166, | 2420.1914, | 24113,   | 384662, | 2417.8382, |
| 6.054031 |         |            | 6.048150 |         |            | 6.042269 |         |            |
| 24038,   | 378546, | 2422.4827, | 24076,   | 380020, | 2420.1295, | 24114,   | 385208, | 2417.7763, |
| 6.053876 |         |            | 6.047995 |         |            | 6.042114 |         |            |
| 24039,   | 378604, | 2422.4208, | 24077,   | 379630, | 2420.0676, | 24115,   | 384914, | 2417.7143, |
| 6.053721 |         |            | 6.047840 |         |            | 6.041960 |         |            |
| 24040,   | 378312, | 2422.3589, | 24078,   | 379346, | 2420.0056, | 24116,   | 384004, | 2417.6524, |
| 6.053567 |         |            | 6.047686 |         |            | 6.041805 |         |            |
| 24041,   | 378124, | 2422.2969, | 24079,   | 379604, | 2419.9437, | 24117,   | 383154, | 2417.5905, |
| 6.053412 |         |            | 6.047531 |         |            | 6.041650 |         |            |
| 24042,   | 378204, | 2422.2350, | 24080,   | 380412, | 2419.8818, | 24118,   | 382808, | 2417.5286, |
| 6.053257 |         |            | 6.047376 |         |            | 6.041495 |         |            |
| 24043,   | 378134, | 2422.1731, | 24081,   | 381274, | 2419.8199, | 24119,   | 382832, | 2417.4666, |
| 6.053102 |         |            | 6.047221 |         |            | 6.041341 |         |            |
| 24044,   | 377384, | 2422.1112, | 24082,   | 381720, | 2419.7579, | 24120,   | 382824, | 2417.4047, |
| 6.052947 |         |            | 6.047067 |         |            | 6.041186 |         |            |
| 24045,   | 376014, | 2422.0492, | 24083,   | 381824, | 2419.6960, | 24121,   | 382704, | 2417.3428, |
| 6.052793 |         |            | 6.046912 |         |            | 6.041031 |         |            |
| 24046,   | 374784, | 2421.9873, | 24084,   | 382102, | 2419.6341, | 24122,   | 382778, | 2417.2809, |
| 6.052638 |         |            | 6.046757 |         |            | 6.040876 |         |            |
| 24047,   | 374500, | 2421.9254, | 24085,   | 382890, | 2419.5721, | 24123,   | 383276, | 2417.2189, |
| 6.052483 |         |            | 6.046602 |         |            | 6.040722 |         |            |
| 24048,   | 375254, | 2421.8634, | 24086,   | 383906, | 2419.5102, | 24124,   | 383966, | 2417.1570, |
| 6.052328 |         |            | 6.046448 |         |            | 6.040567 |         |            |
| 24049,   | 376398, | 2421.8015, | 24087,   | 384498, | 2419.4483, | 24125,   | 384326, | 2417.0951, |
| 6.052174 |         |            | 6.046293 |         |            | 6.040412 |         |            |
| 24050,   | 377210, | 2421.7396, | 24088,   | 384330, | 2419.3864, | 24126,   | 384108, | 2417.0331, |
| 6.052019 |         |            | 6.046138 |         |            | 6.040257 |         |            |
| 24051,   | 377560, | 2421.6777, | 24089,   | 383712, | 2419.3244, | 24127,   | 383598, | 2416.9712, |
| 6.051864 |         |            | 6.045983 |         |            | 6.040103 |         |            |
| 24052,   | 377816, | 2421.6157, | 24090,   | 383200, | 2419.2625, | 24128,   | 383256, | 2416.9093, |
| 6.051709 |         |            | 6.045829 |         |            | 6.039948 |         |            |
| 24053,   | 378292, | 2421.5538, | 24091,   | 382992, | 2419.2006, | 24129,   | 383188, | 2416.8474, |
| 6.051555 |         |            | 6.045674 |         |            | 6.039793 |         |            |
| 24054,   | 378836, | 2421.4919, | 24092,   | 382810, | 2419.1387, | 24130,   | 383074, | 2416.7854, |
| 6.051400 |         |            | 6.045519 |         |            | 6.039638 |         |            |
| 24055,   | 379092, | 2421.4300, | 24093,   | 382372, | 2419.0767, | 24131,   | 382656, | 2416.7235, |
| 6.051245 |         |            | 6.045364 |         |            | 6.039484 |         |            |
| 24056,   | 379026, | 2421.3680, | 24094,   | 381878, | 2419.0148, | 24132,   | 382122, | 2416.6616, |
| 6.051090 |         |            | 6.045210 |         |            | 6.039329 |         |            |
| 24057,   | 379024, | 2421.3061, | 24095,   | 381828, | 2418.9529, | 24133,   | 381934, | 2416.5997, |
| 6.050936 |         |            | 6.045055 |         |            | 6.039174 |         |            |
| 24058,   | 379452, | 2421.2442, | 24096,   | 382388, | 2418.8910, | 24134,   | 382244, | 2416.5377, |
| 6.050781 |         |            | 6.044900 |         |            | 6.039019 |         |            |
| 24059,   | 380180, | 2421.1822, | 24097,   | 383084, | 2418.8290, | 24135,   | 382628, | 2416.4758, |
| 6.050626 |         |            | 6.044745 |         |            | 6.038865 |         |            |
| 24060,   | 380676, | 2421.1203, | 24098,   | 383210, | 2418.7671, | 24136,   | 382548, | 2416.4139, |
| 6.050471 |         |            | 6.044591 |         |            | 6.038710 |         |            |
| 24061,   | 380628, | 2421.0584, | 24099,   | 382568, | 2418.7052, | 24137,   | 381968, | 2416.3519, |
| 6.050317 |         |            | 6.044436 |         |            | 6.038555 |         |            |
| 24062,   | 380292, | 2420.9965, | 24100,   | 381682, | 2418.6432, | 24138,   | 381452, | 2416.2900, |
| 6.050162 |         |            | 6.044281 |         |            | 6.038400 |         |            |

|          |         |            |          |         |            |          |         |            |
|----------|---------|------------|----------|---------|------------|----------|---------|------------|
| 24139,   | 381586, | 2416.2281, | 24177,   | 385334, | 2413.8749, | 24215,   | 385476, | 2411.5216, |
| 6.038246 |         |            | 6.032365 |         |            | 6.026484 |         |            |
| 24140,   | 382336, | 2416.1662, | 24178,   | 385956, | 2413.8129, | 24216,   | 385416, | 2411.4597, |
| 6.038091 |         |            | 6.032210 |         |            | 6.026329 |         |            |
| 24141,   | 383130, | 2416.1042, | 24179,   | 386466, | 2413.7510, | 24217,   | 386000, | 2411.3978, |
| 6.037936 |         |            | 6.032055 |         |            | 6.026174 |         |            |
| 24142,   | 383526, | 2416.0423, | 24180,   | 386366, | 2413.6891, | 24218,   | 386788, | 2411.3359, |
| 6.037781 |         |            | 6.031900 |         |            | 6.026020 |         |            |
| 24143,   | 383668, | 2415.9804, | 24181,   | 385910, | 2413.6272, | 24219,   | 387446, | 2411.2739, |
| 6.037626 |         |            | 6.031746 |         |            | 6.025865 |         |            |
| 24144,   | 384032, | 2415.9185, | 24182,   | 385816, | 2413.5652, | 24220,   | 387896, | 2411.2120, |
| 6.037472 |         |            | 6.031591 |         |            | 6.025710 |         |            |
| 24145,   | 384754, | 2415.8565, | 24183,   | 386450, | 2413.5033, | 24221,   | 388144, | 2411.1501, |
| 6.037317 |         |            | 6.031436 |         |            | 6.025555 |         |            |
| 24146,   | 385392, | 2415.7946, | 24184,   | 387430, | 2413.4414, | 24222,   | 388066, | 2411.0882, |
| 6.037162 |         |            | 6.031281 |         |            | 6.025401 |         |            |
| 24147,   | 385372, | 2415.7327, | 24185,   | 388040, | 2413.3795, | 24223,   | 387558, | 2411.0262, |
| 6.037007 |         |            | 6.031127 |         |            | 6.025246 |         |            |
| 24148,   | 384670, | 2415.6708, | 24186,   | 388012, | 2413.3175, | 24224,   | 386772, | 2410.9643, |
| 6.036853 |         |            | 6.030972 |         |            | 6.025091 |         |            |
| 24149,   | 383878, | 2415.6088, | 24187,   | 387698, | 2413.2556, | 24225,   | 386082, | 2410.9024, |
| 6.036698 |         |            | 6.030817 |         |            | 6.024936 |         |            |
| 24150,   | 383586, | 2415.5469, | 24188,   | 387546, | 2413.1937, | 24226,   | 385802, | 2410.8405, |
| 6.036543 |         |            | 6.030662 |         |            | 6.024782 |         |            |
| 24151,   | 383832, | 2415.4850, | 24189,   | 387526, | 2413.1317, | 24227,   | 385888, | 2410.7785, |
| 6.036388 |         |            | 6.030508 |         |            | 6.024627 |         |            |
| 24152,   | 384166, | 2415.4230, | 24190,   | 387224, | 2413.0698, | 24228,   | 386072, | 2410.7166, |
| 6.036234 |         |            | 6.030353 |         |            | 6.024472 |         |            |
| 24153,   | 384246, | 2415.3611, | 24191,   | 386426, | 2413.0079, | 24229,   | 386172, | 2410.6547, |
| 6.036079 |         |            | 6.030198 |         |            | 6.024317 |         |            |
| 24154,   | 384216, | 2415.2992, | 24192,   | 385510, | 2412.9460, | 24230,   | 386270, | 2410.5927, |
| 6.035924 |         |            | 6.030043 |         |            | 6.024163 |         |            |
| 24155,   | 384420, | 2415.2373, | 24193,   | 385096, | 2412.8840, | 24231,   | 386534, | 2410.5308, |
| 6.035769 |         |            | 6.029889 |         |            | 6.024008 |         |            |
| 24156,   | 384882, | 2415.1753, | 24194,   | 385386, | 2412.8221, | 24232,   | 386968, | 2410.4689, |
| 6.035615 |         |            | 6.029734 |         |            | 6.023853 |         |            |
| 24157,   | 385210, | 2415.1134, | 24195,   | 385994, | 2412.7602, | 24233,   | 387402, | 2410.4070, |
| 6.035460 |         |            | 6.029579 |         |            | 6.023698 |         |            |
| 24158,   | 385098, | 2415.0515, | 24196,   | 386404, | 2412.6983, | 24234,   | 387748, | 2410.3450, |
| 6.035305 |         |            | 6.029424 |         |            | 6.023544 |         |            |
| 24159,   | 384760, | 2414.9896, | 24197,   | 386538, | 2412.6363, | 24235,   | 388152, | 2410.2831, |
| 6.035150 |         |            | 6.029270 |         |            | 6.023389 |         |            |
| 24160,   | 384760, | 2414.9276, | 24198,   | 386726, | 2412.5744, | 24236,   | 388770, | 2410.2212, |
| 6.034996 |         |            | 6.029115 |         |            | 6.023234 |         |            |
| 24161,   | 385332, | 2414.8657, | 24199,   | 387160, | 2412.5125, | 24237,   | 389526, | 2410.1593, |
| 6.034841 |         |            | 6.028960 |         |            | 6.023079 |         |            |
| 24162,   | 386072, | 2414.8038, | 24200,   | 387518, | 2412.4506, | 24238,   | 390066, | 2410.0973, |
| 6.034686 |         |            | 6.028805 |         |            | 6.022925 |         |            |
| 24163,   | 386326, | 2414.7418, | 24201,   | 387280, | 2412.3886, | 24239,   | 390148, | 2410.0354, |
| 6.034531 |         |            | 6.028651 |         |            | 6.022770 |         |            |
| 24164,   | 385934, | 2414.6799, | 24202,   | 386398, | 2412.3267, | 24240,   | 389902, | 2409.9735, |
| 6.034377 |         |            | 6.028496 |         |            | 6.022615 |         |            |
| 24165,   | 385438, | 2414.6180, | 24203,   | 385484, | 2412.2648, | 24241,   | 389698, | 2409.9115, |
| 6.034222 |         |            | 6.028341 |         |            | 6.022460 |         |            |
| 24166,   | 385468, | 2414.5561, | 24204,   | 385222, | 2412.2028, | 24242,   | 389680, | 2409.8496, |
| 6.034067 |         |            | 6.028186 |         |            | 6.022305 |         |            |
| 24167,   | 386078, | 2414.4941, | 24205,   | 385664, | 2412.1409, | 24243,   | 389550, | 2409.7877, |
| 6.033912 |         |            | 6.028032 |         |            | 6.022151 |         |            |
| 24168,   | 386710, | 2414.4322, | 24206,   | 386168, | 2412.0790, | 24244,   | 388902, | 2409.7258, |
| 6.033758 |         |            | 6.027877 |         |            | 6.021996 |         |            |
| 24169,   | 386850, | 2414.3703, | 24207,   | 386116, | 2412.0171, | 24245,   | 387744, | 2409.6638, |
| 6.033603 |         |            | 6.027722 |         |            | 6.021841 |         |            |
| 24170,   | 386608, | 2414.3084, | 24208,   | 385616, | 2411.9551, | 24246,   | 386618, | 2409.6019, |
| 6.033448 |         |            | 6.027567 |         |            | 6.021686 |         |            |
| 24171,   | 386504, | 2414.2464, | 24209,   | 385364, | 2411.8932, | 24247,   | 386096, | 2409.5400, |
| 6.033293 |         |            | 6.027412 |         |            | 6.021532 |         |            |
| 24172,   | 386774, | 2414.1845, | 24210,   | 385868, | 2411.8313, | 24248,   | 386250, | 2409.4781, |
| 6.033139 |         |            | 6.027258 |         |            | 6.021377 |         |            |
| 24173,   | 387044, | 2414.1226, | 24211,   | 386832, | 2411.7694, | 24249,   | 386652, | 2409.4161, |
| 6.032984 |         |            | 6.027103 |         |            | 6.021222 |         |            |
| 24174,   | 386782, | 2414.0607, | 24212,   | 387436, | 2411.7074, | 24250,   | 386898, | 2409.3542, |
| 6.032829 |         |            | 6.026948 |         |            | 6.021067 |         |            |
| 24175,   | 385994, | 2413.9987, | 24213,   | 387144, | 2411.6455, | 24251,   | 387060, | 2409.2923, |
| 6.032674 |         |            | 6.026793 |         |            | 6.020913 |         |            |
| 24176,   | 385312, | 2413.9368, | 24214,   | 386234, | 2411.5836, | 24252,   | 387522, | 2409.2304, |
| 6.032519 |         |            | 6.026639 |         |            | 6.020758 |         |            |



|          |         |            |          |         |            |          |         |            |
|----------|---------|------------|----------|---------|------------|----------|---------|------------|
| 24253,   | 388446, | 2409.1684, | 24291,   | 390558, | 2406.8152, | 24329,   | 393060, | 2404.4620, |
| 6.020603 |         |            | 6.014722 |         |            | 6.008842 |         |            |
| 24254,   | 389460, | 2409.1065, | 24292,   | 391180, | 2406.7533, | 24330,   | 393652, | 2404.4001, |
| 6.020448 |         |            | 6.014568 |         |            | 6.008687 |         |            |
| 24255,   | 390040, | 2409.0446, | 24293,   | 391322, | 2406.6914, | 24331,   | 394286, | 2404.3381, |
| 6.020294 |         |            | 6.014413 |         |            | 6.008532 |         |            |
| 24256,   | 390054, | 2408.9826, | 24294,   | 390838, | 2406.6294, | 24332,   | 394632, | 2404.2762, |
| 6.020139 |         |            | 6.014258 |         |            | 6.008377 |         |            |
| 24257,   | 389884, | 2408.9207, | 24295,   | 390286, | 2406.5675, | 24333,   | 394738, | 2404.2143, |
| 6.019984 |         |            | 6.014103 |         |            | 6.008223 |         |            |
| 24258,   | 389966, | 2408.8588, | 24296,   | 390264, | 2406.5056, | 24334,   | 394802, | 2404.1523, |
| 6.019829 |         |            | 6.013949 |         |            | 6.008068 |         |            |
| 24259,   | 390278, | 2408.7969, | 24297,   | 390702, | 2406.4436, | 24335,   | 394766, | 2404.0904, |
| 6.019675 |         |            | 6.013794 |         |            | 6.007913 |         |            |
| 24260,   | 390416, | 2408.7349, | 24298,   | 390982, | 2406.3817, | 24336,   | 394324, | 2404.0285, |
| 6.019520 |         |            | 6.013639 |         |            | 6.007758 |         |            |
| 24261,   | 390112, | 2408.6730, | 24299,   | 390720, | 2406.3198, | 24337,   | 393372, | 2403.9666, |
| 6.019365 |         |            | 6.013484 |         |            | 6.007603 |         |            |
| 24262,   | 389620, | 2408.6111, | 24300,   | 390284, | 2406.2579, | 24338,   | 392336, | 2403.9046, |
| 6.019210 |         |            | 6.013330 |         |            | 6.007449 |         |            |
| 24263,   | 389458, | 2408.5492, | 24301,   | 390422, | 2406.1959, | 24339,   | 391886, | 2403.8427, |
| 6.019056 |         |            | 6.013175 |         |            | 6.007294 |         |            |
| 24264,   | 389830, | 2408.4872, | 24302,   | 391382, | 2406.1340, | 24340,   | 392328, | 2403.7808, |
| 6.018901 |         |            | 6.013020 |         |            | 6.007139 |         |            |
| 24265,   | 390422, | 2408.4253, | 24303,   | 392582, | 2406.0721, | 24341,   | 393296, | 2403.7189, |
| 6.018746 |         |            | 6.012865 |         |            | 6.006984 |         |            |
| 24266,   | 390776, | 2408.3634, | 24304,   | 393188, | 2406.0102, | 24342,   | 394150, | 2403.6569, |
| 6.018591 |         |            | 6.012710 |         |            | 6.006830 |         |            |
| 24267,   | 390786, | 2408.3015, | 24305,   | 392976, | 2405.9482, | 24343,   | 394608, | 2403.5950, |
| 6.018437 |         |            | 6.012556 |         |            | 6.006675 |         |            |
| 24268,   | 390718, | 2408.2395, | 24306,   | 392484, | 2405.8863, | 24344,   | 394954, | 2403.5331, |
| 6.018282 |         |            | 6.012401 |         |            | 6.006520 |         |            |
| 24269,   | 390770, | 2408.1776, | 24307,   | 392328, | 2405.8244, | 24345,   | 395612, | 2403.4712, |
| 6.018127 |         |            | 6.012246 |         |            | 6.006365 |         |            |
| 24270,   | 390740, | 2408.1157, | 24308,   | 392474, | 2405.7624, | 24346,   | 396606, | 2403.4092, |
| 6.017972 |         |            | 6.012091 |         |            | 6.006211 |         |            |
| 24271,   | 390292, | 2408.0537, | 24309,   | 392394, | 2405.7005, | 24347,   | 397542, | 2403.3473, |
| 6.017817 |         |            | 6.011937 |         |            | 6.006056 |         |            |
| 24272,   | 389440, | 2407.9918, | 24310,   | 391782, | 2405.6386, | 24348,   | 398042, | 2403.2854, |
| 6.017663 |         |            | 6.011782 |         |            | 6.005901 |         |            |
| 24273,   | 388688, | 2407.9299, | 24311,   | 391088, | 2405.5767, | 24349,   | 398112, | 2403.2234, |
| 6.017508 |         |            | 6.011627 |         |            | 6.005746 |         |            |
| 24274,   | 388504, | 2407.8680, | 24312,   | 391068, | 2405.5147, | 24350,   | 398024, | 2403.1615, |
| 6.017353 |         |            | 6.011472 |         |            | 6.005592 |         |            |
| 24275,   | 388788, | 2407.8060, | 24313,   | 391946, | 2405.4528, | 24351,   | 397930, | 2403.0996, |
| 6.017198 |         |            | 6.011318 |         |            | 6.005437 |         |            |
| 24276,   | 388964, | 2407.7441, | 24314,   | 393110, | 2405.3909, | 24352,   | 397690, | 2403.0377, |
| 6.017044 |         |            | 6.011163 |         |            | 6.005282 |         |            |
| 24277,   | 388664, | 2407.6822, | 24315,   | 393736, | 2405.3290, | 24353,   | 397158, | 2402.9757, |
| 6.016889 |         |            | 6.011008 |         |            | 6.005127 |         |            |
| 24278,   | 388226, | 2407.6203, | 24316,   | 393618, | 2405.2670, | 24354,   | 396462, | 2402.9138, |
| 6.016734 |         |            | 6.010853 |         |            | 6.004973 |         |            |
| 24279,   | 388390, | 2407.5583, | 24317,   | 393274, | 2405.2051, | 24355,   | 395906, | 2402.8519, |
| 6.016579 |         |            | 6.010699 |         |            | 6.004818 |         |            |
| 24280,   | 389480, | 2407.4964, | 24318,   | 393292, | 2405.1432, | 24356,   | 395602, | 2402.7900, |
| 6.016425 |         |            | 6.010544 |         |            | 6.004663 |         |            |
| 24281,   | 390978, | 2407.4345, | 24319,   | 393608, | 2405.0813, | 24357,   | 395326, | 2402.7280, |
| 6.016270 |         |            | 6.010389 |         |            | 6.004508 |         |            |
| 24282,   | 392024, | 2407.3725, | 24320,   | 393656, | 2405.0193, | 24358,   | 394796, | 2402.6661, |
| 6.016115 |         |            | 6.010234 |         |            | 6.004354 |         |            |
| 24283,   | 392234, | 2407.3106, | 24321,   | 393096, | 2404.9574, | 24359,   | 394116, | 2402.6042, |
| 6.015960 |         |            | 6.010080 |         |            | 6.004199 |         |            |
| 24284,   | 391998, | 2407.2487, | 24322,   | 392292, | 2404.8955, | 24360,   | 393778, | 2402.5422, |
| 6.015806 |         |            | 6.009925 |         |            | 6.004044 |         |            |
| 24285,   | 391912, | 2407.1868, | 24323,   | 391958, | 2404.8335, | 24361,   | 394122, | 2402.4803, |
| 6.015651 |         |            | 6.009770 |         |            | 6.003889 |         |            |
| 24286,   | 392052, | 2407.1248, | 24324,   | 392362, | 2404.7716, | 24362,   | 394926, | 2402.4184, |
| 6.015496 |         |            | 6.009615 |         |            | 6.003735 |         |            |
| 24287,   | 391978, | 2407.0629, | 24325,   | 393064, | 2404.7097, | 24363,   | 395504, | 2402.3565, |
| 6.015341 |         |            | 6.009461 |         |            | 6.003580 |         |            |
| 24288,   | 391364, | 2407.0010, | 24326,   | 393402, | 2404.6478, | 24364,   | 395368, | 2402.2945, |
| 6.015187 |         |            | 6.009306 |         |            | 6.003425 |         |            |
| 24289,   | 390536, | 2406.9391, | 24327,   | 393204, | 2404.5858, | 24365,   | 394684, | 2402.2326, |
| 6.015032 |         |            | 6.009151 |         |            | 6.003270 |         |            |
| 24290,   | 390180, | 2406.8771, | 24328,   | 392920, | 2404.5239, | 24366,   | 394034, | 2402.1707, |
| 6.014877 |         |            | 6.008996 |         |            | 6.003116 |         |            |

|          |         |            |          |         |            |          |         |            |
|----------|---------|------------|----------|---------|------------|----------|---------|------------|
| 24367,   | 393818, | 2402.1088, | 24405,   | 392954, | 2399.7555, | 24443,   | 399482, | 2397.4023, |
| 6.002961 |         |            | 5.997080 |         |            | 5.991199 |         |            |
| 24368,   | 393900, | 2402.0468, | 24406,   | 393460, | 2399.6936, | 24444,   | 399668, | 2397.3404, |
| 6.002806 |         |            | 5.996925 |         |            | 5.991044 |         |            |
| 24369,   | 393910, | 2401.9849, | 24407,   | 393814, | 2399.6317, | 24445,   | 399618, | 2397.2785, |
| 6.002651 |         |            | 5.996770 |         |            | 5.990890 |         |            |
| 24370,   | 393738, | 2401.9230, | 24408,   | 393938, | 2399.5698, | 24446,   | 399408, | 2397.2165, |
| 6.002496 |         |            | 5.996616 |         |            | 5.990735 |         |            |
| 24371,   | 393644, | 2401.8611, | 24409,   | 394126, | 2399.5078, | 24447,   | 399486, | 2397.1546, |
| 6.002342 |         |            | 5.996461 |         |            | 5.990580 |         |            |
| 24372,   | 393888, | 2401.7991, | 24410,   | 394582, | 2399.4459, | 24448,   | 400036, | 2397.0927, |
| 6.002187 |         |            | 5.996306 |         |            | 5.990425 |         |            |
| 24373,   | 394360, | 2401.7372, | 24411,   | 395086, | 2399.3840, | 24449,   | 400670, | 2397.0308, |
| 6.002032 |         |            | 5.996151 |         |            | 5.990271 |         |            |
| 24374,   | 394712, | 2401.6753, | 24412,   | 395216, | 2399.3220, | 24450,   | 400774, | 2396.9688, |
| 6.001877 |         |            | 5.995997 |         |            | 5.990116 |         |            |
| 24375,   | 394826, | 2401.6133, | 24413,   | 394826, | 2399.2601, | 24451,   | 400210, | 2396.9069, |
| 6.001723 |         |            | 5.995842 |         |            | 5.989961 |         |            |
| 24376,   | 395002, | 2401.5514, | 24414,   | 394272, | 2399.1982, | 24452,   | 399490, | 2396.8450, |
| 6.001568 |         |            | 5.995687 |         |            | 5.989806 |         |            |
| 24377,   | 395630, | 2401.4895, | 24415,   | 394062, | 2399.1363, | 24453,   | 399232, | 2396.7830, |
| 6.001413 |         |            | 5.995532 |         |            | 5.989652 |         |            |
| 24378,   | 396652, | 2401.4276, | 24416,   | 394406, | 2399.0743, | 24454,   | 399530, | 2396.7211, |
| 6.001258 |         |            | 5.995378 |         |            | 5.989497 |         |            |
| 24379,   | 397544, | 2401.3656, | 24417,   | 395076, | 2399.0124, | 24455,   | 399926, | 2396.6592, |
| 6.001104 |         |            | 5.995223 |         |            | 5.989342 |         |            |
| 24380,   | 397786, | 2401.3037, | 24418,   | 395708, | 2398.9505, | 24456,   | 400004, | 2396.5973, |
| 6.000949 |         |            | 5.995068 |         |            | 5.989187 |         |            |
| 24381,   | 397386, | 2401.2418, | 24419,   | 396110, | 2398.8886, | 24457,   | 399832, | 2396.5353, |
| 6.000794 |         |            | 5.994913 |         |            | 5.989033 |         |            |
| 24382,   | 396818, | 2401.1799, | 24420,   | 396218, | 2398.8266, | 24458,   | 399822, | 2396.4734, |
| 6.000639 |         |            | 5.994759 |         |            | 5.988878 |         |            |
| 24383,   | 396486, | 2401.1179, | 24421,   | 395948, | 2398.7647, | 24459,   | 400170, | 2396.4115, |
| 6.000485 |         |            | 5.994604 |         |            | 5.988723 |         |            |
| 24384,   | 396352, | 2401.0560, | 24422,   | 395236, | 2398.7028, | 24460,   | 400658, | 2396.3496, |
| 6.000330 |         |            | 5.994449 |         |            | 5.988568 |         |            |
| 24385,   | 396100, | 2400.9941, | 24423,   | 394334, | 2398.6409, | 24461,   | 400986, | 2396.2876, |
| 6.000175 |         |            | 5.994294 |         |            | 5.988414 |         |            |
| 24386,   | 395632, | 2400.9321, | 24424,   | 393858, | 2398.5789, | 24462,   | 401220, | 2396.2257, |
| 6.000020 |         |            | 5.994140 |         |            | 5.988259 |         |            |
| 24387,   | 395240, | 2400.8702, | 24425,   | 394368, | 2398.5170, | 24463,   | 401736, | 2396.1638, |
| 5.999866 |         |            | 5.993985 |         |            | 5.988104 |         |            |
| 24388,   | 395276, | 2400.8083, | 24426,   | 395790, | 2398.4551, | 24464,   | 402686, | 2396.1018, |
| 5.999711 |         |            | 5.993830 |         |            | 5.987949 |         |            |
| 24389,   | 395716, | 2400.7464, | 24427,   | 397288, | 2398.3931, | 24465,   | 403638, | 2396.0399, |
| 5.999556 |         |            | 5.993675 |         |            | 5.987795 |         |            |
| 24390,   | 396158, | 2400.6844, | 24428,   | 397946, | 2398.3312, | 24466,   | 403966, | 2395.9780, |
| 5.999401 |         |            | 5.993521 |         |            | 5.987640 |         |            |
| 24391,   | 396304, | 2400.6225, | 24429,   | 397592, | 2398.2693, | 24467,   | 403504, | 2395.9161, |
| 5.999247 |         |            | 5.993366 |         |            | 5.987485 |         |            |
| 24392,   | 396300, | 2400.5606, | 24430,   | 396908, | 2398.2074, | 24468,   | 402820, | 2395.8541, |
| 5.999092 |         |            | 5.993211 |         |            | 5.987330 |         |            |
| 24393,   | 396558, | 2400.4987, | 24431,   | 396730, | 2398.1454, | 24469,   | 402646, | 2395.7922, |
| 5.998937 |         |            | 5.993056 |         |            | 5.987175 |         |            |
| 24394,   | 397238, | 2400.4367, | 24432,   | 397218, | 2398.0835, | 24470,   | 403158, | 2395.7303, |
| 5.998782 |         |            | 5.992902 |         |            | 5.987021 |         |            |
| 24395,   | 398034, | 2400.3748, | 24433,   | 397802, | 2398.0216, | 24471,   | 403840, | 2395.6684, |
| 5.998628 |         |            | 5.992747 |         |            | 5.986866 |         |            |
| 24396,   | 398462, | 2400.3129, | 24434,   | 397950, | 2397.9597, | 24472,   | 404096, | 2395.6064, |
| 5.998473 |         |            | 5.992592 |         |            | 5.986711 |         |            |
| 24397,   | 398352, | 2400.2510, | 24435,   | 397808, | 2397.8977, | 24473,   | 403870, | 2395.5445, |
| 5.998318 |         |            | 5.992437 |         |            | 5.986556 |         |            |
| 24398,   | 397946, | 2400.1890, | 24436,   | 398034, | 2397.8358, | 24474,   | 403638, | 2395.4826, |
| 5.998163 |         |            | 5.992282 |         |            | 5.986402 |         |            |
| 24399,   | 397492, | 2400.1271, | 24437,   | 398988, | 2397.7739, | 24475,   | 403762, | 2395.4207, |
| 5.998009 |         |            | 5.992128 |         |            | 5.986247 |         |            |
| 24400,   | 396916, | 2400.0652, | 24438,   | 400238, | 2397.7119, | 24476,   | 404098, | 2395.3587, |
| 5.997854 |         |            | 5.991973 |         |            | 5.986092 |         |            |
| 24401,   | 395960, | 2400.0032, | 24439,   | 400938, | 2397.6500, | 24477,   | 404250, | 2395.2968, |
| 5.997699 |         |            | 5.991818 |         |            | 5.985937 |         |            |
| 24402,   | 394630, | 2399.9413, | 24440,   | 400708, | 2397.5881, | 24478,   | 404152, | 2395.2349, |
| 5.997544 |         |            | 5.991663 |         |            | 5.985783 |         |            |
| 24403,   | 393388, | 2399.8794, | 24441,   | 399974, | 2397.5262, | 24479,   | 404206, | 2395.1729, |
| 5.997389 |         |            | 5.991509 |         |            | 5.985628 |         |            |
| 24404,   | 392792, | 2399.8175, | 24442,   | 399470, | 2397.4642, | 24480,   | 404766, | 2395.1110, |
| 5.997235 |         |            | 5.991354 |         |            | 5.985473 |         |            |

|          |         |            |          |         |            |          |         |            |
|----------|---------|------------|----------|---------|------------|----------|---------|------------|
| 24481,   | 405582, | 2395.0491, | 24519,   | 403044, | 2392.6959, | 24557,   | 410010, | 2390.3426, |
| 5.985318 |         |            | 5.979438 |         |            | 5.973557 |         |            |
| 24482,   | 405912, | 2394.9872, | 24520,   | 403136, | 2392.6339, | 24558,   | 409678, | 2390.2807, |
| 5.985164 |         |            | 5.979283 |         |            | 5.973402 |         |            |
| 24483,   | 405304, | 2394.9252, | 24521,   | 402992, | 2392.5720, | 24559,   | 408402, | 2390.2188, |
| 5.985009 |         |            | 5.979128 |         |            | 5.973247 |         |            |
| 24484,   | 404130, | 2394.8633, | 24522,   | 402856, | 2392.5101, | 24560,   | 407048, | 2390.1569, |
| 5.984854 |         |            | 5.978973 |         |            | 5.973093 |         |            |
| 24485,   | 403292, | 2394.8014, | 24523,   | 403096, | 2392.4482, | 24561,   | 406628, | 2390.0949, |
| 5.984699 |         |            | 5.978819 |         |            | 5.972938 |         |            |
| 24486,   | 403352, | 2394.7395, | 24524,   | 403740, | 2392.3862, | 24562,   | 407340, | 2390.0330, |
| 5.984545 |         |            | 5.978664 |         |            | 5.972783 |         |            |
| 24487,   | 404010, | 2394.6775, | 24525,   | 404426, | 2392.3243, | 24563,   | 408376, | 2389.9711, |
| 5.984390 |         |            | 5.978509 |         |            | 5.972628 |         |            |
| 24488,   | 404470, | 2394.6156, | 24526,   | 404824, | 2392.2624, | 24564,   | 408762, | 2389.9092, |
| 5.984235 |         |            | 5.978354 |         |            | 5.972473 |         |            |
| 24489,   | 404252, | 2394.5537, | 24527,   | 405038, | 2392.2005, | 24565,   | 408322, | 2389.8472, |
| 5.984080 |         |            | 5.978200 |         |            | 5.972319 |         |            |
| 24490,   | 403594, | 2394.4918, | 24528,   | 405480, | 2392.1385, | 24566,   | 407762, | 2389.7853, |
| 5.983926 |         |            | 5.978045 |         |            | 5.972164 |         |            |
| 24491,   | 403072, | 2394.4298, | 24529,   | 406306, | 2392.0766, | 24567,   | 407828, | 2389.7234, |
| 5.983771 |         |            | 5.977890 |         |            | 5.972009 |         |            |
| 24492,   | 402970, | 2394.3679, | 24530,   | 407148, | 2392.0147, | 24568,   | 408546, | 2389.6615, |
| 5.983616 |         |            | 5.977735 |         |            | 5.971854 |         |            |
| 24493,   | 403112, | 2394.3060, | 24531,   | 407436, | 2391.9527, | 24569,   | 409358, | 2389.5995, |
| 5.983461 |         |            | 5.977580 |         |            | 5.971700 |         |            |
| 24494,   | 403234, | 2394.2440, | 24532,   | 407042, | 2391.8908, | 24570,   | 409848, | 2389.5376, |
| 5.983307 |         |            | 5.977426 |         |            | 5.971545 |         |            |
| 24495,   | 403304, | 2394.1821, | 24533,   | 406404, | 2391.8289, | 24571,   | 410256, | 2389.4757, |
| 5.983152 |         |            | 5.977271 |         |            | 5.971390 |         |            |
| 24496,   | 403442, | 2394.1202, | 24534,   | 406050, | 2391.7670, | 24572,   | 411058, | 2389.4137, |
| 5.982997 |         |            | 5.977116 |         |            | 5.971235 |         |            |
| 24497,   | 403570, | 2394.0583, | 24535,   | 406024, | 2391.7050, | 24573,   | 412284, | 2389.3518, |
| 5.982842 |         |            | 5.976961 |         |            | 5.971081 |         |            |
| 24498,   | 403362, | 2393.9963, | 24536,   | 405938, | 2391.6431, | 24574,   | 413328, | 2389.2899, |
| 5.982688 |         |            | 5.976807 |         |            | 5.970926 |         |            |
| 24499,   | 402624, | 2393.9344, | 24537,   | 405550, | 2391.5812, | 24575,   | 413548, | 2389.2280, |
| 5.982533 |         |            | 5.976652 |         |            | 5.970771 |         |            |
| 24500,   | 401674, | 2393.8725, | 24538,   | 405170, | 2391.5193, | 24576,   | 412948, | 2389.1660, |
| 5.982378 |         |            | 5.976497 |         |            | 5.970616 |         |            |
| 24501,   | 401124, | 2393.8106, | 24539,   | 405386, | 2391.4573, | 24577,   | 412184, | 2389.1041, |
| 5.982223 |         |            | 5.976342 |         |            | 5.970462 |         |            |
| 24502,   | 401268, | 2393.7486, | 24540,   | 406360, | 2391.3954, | 24578,   | 411830, | 2389.0422, |
| 5.982068 |         |            | 5.976188 |         |            | 5.970307 |         |            |
| 24503,   | 401748, | 2393.6867, | 24541,   | 407570, | 2391.3335, | 24579,   | 411824, | 2388.9803, |
| 5.981914 |         |            | 5.976033 |         |            | 5.970152 |         |            |
| 24504,   | 401900, | 2393.6248, | 24542,   | 408282, | 2391.2716, | 24580,   | 411620, | 2388.9183, |
| 5.981759 |         |            | 5.975878 |         |            | 5.969997 |         |            |
| 24505,   | 401486, | 2393.5628, | 24543,   | 408262, | 2391.2096, | 24581,   | 410854, | 2388.8564, |
| 5.981604 |         |            | 5.975723 |         |            | 5.969843 |         |            |
| 24506,   | 400966, | 2393.5009, | 24544,   | 407930, | 2391.1477, | 24582,   | 409744, | 2388.7945, |
| 5.981449 |         |            | 5.975569 |         |            | 5.969688 |         |            |
| 24507,   | 401012, | 2393.4390, | 24545,   | 407814, | 2391.0858, | 24583,   | 408794, | 2388.7325, |
| 5.981295 |         |            | 5.975414 |         |            | 5.969533 |         |            |
| 24508,   | 401824, | 2393.3771, | 24546,   | 407962, | 2391.0238, | 24584,   | 408240, | 2388.6706, |
| 5.981140 |         |            | 5.975259 |         |            | 5.969378 |         |            |
| 24509,   | 402930, | 2393.3151, | 24547,   | 407968, | 2390.9619, | 24585,   | 407876, | 2388.6087, |
| 5.980985 |         |            | 5.975104 |         |            | 5.969224 |         |            |
| 24510,   | 403700, | 2393.2532, | 24548,   | 407604, | 2390.9000, | 24586,   | 407428, | 2388.5468, |
| 5.980830 |         |            | 5.974950 |         |            | 5.969069 |         |            |
| 24511,   | 403932, | 2393.1913, | 24549,   | 407138, | 2390.8381, | 24587,   | 406960, | 2388.4848, |
| 5.980676 |         |            | 5.974795 |         |            | 5.968914 |         |            |
| 24512,   | 403920, | 2393.1294, | 24550,   | 407076, | 2390.7761, | 24588,   | 406770, | 2388.4229, |
| 5.980521 |         |            | 5.974640 |         |            | 5.968759 |         |            |
| 24513,   | 403960, | 2393.0674, | 24551,   | 407524, | 2390.7142, | 24589,   | 406974, | 2388.3610, |
| 5.980366 |         |            | 5.974485 |         |            | 5.968605 |         |            |
| 24514,   | 404006, | 2393.0055, | 24552,   | 408094, | 2390.6523, | 24590,   | 407306, | 2388.2991, |
| 5.980211 |         |            | 5.974331 |         |            | 5.968450 |         |            |
| 24515,   | 403816, | 2392.9436, | 24553,   | 408366, | 2390.5904, | 24591,   | 407408, | 2388.2371, |
| 5.980057 |         |            | 5.974176 |         |            | 5.968295 |         |            |
| 24516,   | 403362, | 2392.8817, | 24554,   | 408440, | 2390.5284, | 24592,   | 407228, | 2388.1752, |
| 5.979902 |         |            | 5.974021 |         |            | 5.968140 |         |            |
| 24517,   | 402948, | 2392.8197, | 24555,   | 408760, | 2390.4665, | 24593,   | 407058, | 2388.1133, |
| 5.979747 |         |            | 5.973866 |         |            | 5.967986 |         |            |
| 24518,   | 402870, | 2392.7578, | 24556,   | 409466, | 2390.4046, | 24594,   | 407142, | 2388.0514, |
| 5.979592 |         |            | 5.973712 |         |            | 5.967831 |         |            |

|          |         |            |          |         |            |          |         |            |
|----------|---------|------------|----------|---------|------------|----------|---------|------------|
| 24595,   | 407334, | 2387.9894, | 24633,   | 405428, | 2385.6362, | 24671,   | 414024, | 2383.2830, |
| 5.967676 |         |            | 5.961795 |         |            | 5.955914 |         |            |
| 24596,   | 407304, | 2387.9275, | 24634,   | 405312, | 2385.5743, | 24672,   | 413956, | 2383.2211, |
| 5.967521 |         |            | 5.961640 |         |            | 5.955760 |         |            |
| 24597,   | 406978, | 2387.8656, | 24635,   | 405138, | 2385.5123, | 24673,   | 413498, | 2383.1591, |
| 5.967366 |         |            | 5.961486 |         |            | 5.955605 |         |            |
| 24598,   | 406736, | 2387.8036, | 24636,   | 405224, | 2385.4504, | 24674,   | 413184, | 2383.0972, |
| 5.967212 |         |            | 5.961331 |         |            | 5.955450 |         |            |
| 24599,   | 407024, | 2387.7417, | 24637,   | 405916, | 2385.3885, | 24675,   | 413356, | 2383.0353, |
| 5.967057 |         |            | 5.961176 |         |            | 5.955295 |         |            |
| 24600,   | 407858, | 2387.6798, | 24638,   | 407070, | 2385.3266, | 24676,   | 413806, | 2382.9733, |
| 5.966902 |         |            | 5.961021 |         |            | 5.955141 |         |            |
| 24601,   | 408808, | 2387.6179, | 24639,   | 408044, | 2385.2646, | 24677,   | 414016, | 2382.9114, |
| 5.966747 |         |            | 5.960867 |         |            | 5.954986 |         |            |
| 24602,   | 409464, | 2387.5559, | 24640,   | 408286, | 2385.2027, | 24678,   | 413788, | 2382.8495, |
| 5.966593 |         |            | 5.960712 |         |            | 5.954831 |         |            |
| 24603,   | 409838, | 2387.4940, | 24641,   | 407862, | 2385.1408, | 24679,   | 413470, | 2382.7876, |
| 5.966438 |         |            | 5.960557 |         |            | 5.954676 |         |            |
| 24604,   | 410242, | 2387.4321, | 24642,   | 407336, | 2385.0789, | 24680,   | 413590, | 2382.7256, |
| 5.966283 |         |            | 5.960402 |         |            | 5.954522 |         |            |
| 24605,   | 410802, | 2387.3702, | 24643,   | 407160, | 2385.0169, | 24681,   | 414258, | 2382.6637, |
| 5.966128 |         |            | 5.960248 |         |            | 5.954367 |         |            |
| 24606,   | 411278, | 2387.3082, | 24644,   | 407208, | 2384.9550, | 24682,   | 415038, | 2382.6018, |
| 5.965974 |         |            | 5.960093 |         |            | 5.954212 |         |            |
| 24607,   | 411418, | 2387.2463, | 24645,   | 407028, | 2384.8931, | 24683,   | 415432, | 2382.5399, |
| 5.965819 |         |            | 5.959938 |         |            | 5.954057 |         |            |
| 24608,   | 411426, | 2387.1844, | 24646,   | 406420, | 2384.8312, | 24684,   | 415404, | 2382.4779, |
| 5.965664 |         |            | 5.959783 |         |            | 5.953903 |         |            |
| 24609,   | 411874, | 2387.1224, | 24647,   | 405706, | 2384.7692, | 24685,   | 415384, | 2382.4160, |
| 5.965509 |         |            | 5.959629 |         |            | 5.953748 |         |            |
| 24610,   | 413106, | 2387.0605, | 24648,   | 405374, | 2384.7073, | 24686,   | 415764, | 2382.3541, |
| 5.965355 |         |            | 5.959474 |         |            | 5.953593 |         |            |
| 24611,   | 414740, | 2386.9986, | 24649,   | 405588, | 2384.6454, | 24687,   | 416486, | 2382.2922, |
| 5.965200 |         |            | 5.959319 |         |            | 5.953438 |         |            |
| 24612,   | 415938, | 2386.9367, | 24650,   | 406080, | 2384.5834, | 24688,   | 417230, | 2382.2302, |
| 5.965045 |         |            | 5.959164 |         |            | 5.953284 |         |            |
| 24613,   | 416150, | 2386.8747, | 24651,   | 406528, | 2384.5215, | 24689,   | 417810, | 2382.1683, |
| 5.964890 |         |            | 5.959010 |         |            | 5.953129 |         |            |
| 24614,   | 415614, | 2386.8128, | 24652,   | 406936, | 2384.4596, | 24690,   | 418360, | 2382.1064, |
| 5.964736 |         |            | 5.958855 |         |            | 5.952974 |         |            |
| 24615,   | 414974, | 2386.7509, | 24653,   | 407540, | 2384.3977, | 24691,   | 419018, | 2382.0444, |
| 5.964581 |         |            | 5.958700 |         |            | 5.952819 |         |            |
| 24616,   | 414576, | 2386.6890, | 24654,   | 408416, | 2384.3357, | 24692,   | 419582, | 2381.9825, |
| 5.964426 |         |            | 5.958545 |         |            | 5.952665 |         |            |
| 24617,   | 414160, | 2386.6270, | 24655,   | 409320, | 2384.2738, | 24693,   | 419670, | 2381.9206, |
| 5.964271 |         |            | 5.958391 |         |            | 5.952510 |         |            |
| 24618,   | 413302, | 2386.5651, | 24656,   | 409952, | 2384.2119, | 24694,   | 419220, | 2381.8587, |
| 5.964117 |         |            | 5.958236 |         |            | 5.952355 |         |            |
| 24619,   | 412088, | 2386.5032, | 24657,   | 410324, | 2384.1500, | 24695,   | 418716, | 2381.7967, |
| 5.963962 |         |            | 5.958081 |         |            | 5.952200 |         |            |
| 24620,   | 411102, | 2386.4413, | 24658,   | 410720, | 2384.0880, | 24696,   | 418782, | 2381.7348, |
| 5.963807 |         |            | 5.957926 |         |            | 5.952045 |         |            |
| 24621,   | 410794, | 2386.3793, | 24659,   | 411354, | 2384.0261, | 24697,   | 419530, | 2381.6729, |
| 5.963652 |         |            | 5.957772 |         |            | 5.951891 |         |            |
| 24622,   | 410934, | 2386.3174, | 24660,   | 412050, | 2383.9642, | 24698,   | 420372, | 2381.6110, |
| 5.963498 |         |            | 5.957617 |         |            | 5.951736 |         |            |
| 24623,   | 410804, | 2386.2555, | 24661,   | 412426, | 2383.9022, | 24699,   | 420598, | 2381.5490, |
| 5.963343 |         |            | 5.957462 |         |            | 5.951581 |         |            |
| 24624,   | 409966, | 2386.1935, | 24662,   | 412302, | 2383.8403, | 24700,   | 420074, | 2381.4871, |
| 5.963188 |         |            | 5.957307 |         |            | 5.951426 |         |            |
| 24625,   | 408740, | 2386.1316, | 24663,   | 411928, | 2383.7784, | 24701,   | 419308, | 2381.4252, |
| 5.963033 |         |            | 5.957152 |         |            | 5.951272 |         |            |
| 24626,   | 407832, | 2386.0697, | 24664,   | 411680, | 2383.7165, | 24702,   | 418886, | 2381.3632, |
| 5.962879 |         |            | 5.956998 |         |            | 5.951117 |         |            |
| 24627,   | 407596, | 2386.0078, | 24665,   | 411694, | 2383.6545, | 24703,   | 418866, | 2381.3013, |
| 5.962724 |         |            | 5.956843 |         |            | 5.950962 |         |            |
| 24628,   | 407666, | 2385.9458, | 24666,   | 411838, | 2383.5926, | 24704,   | 418860, | 2381.2394, |
| 5.962569 |         |            | 5.956688 |         |            | 5.950807 |         |            |
| 24629,   | 407462, | 2385.8839, | 24667,   | 411990, | 2383.5307, | 24705,   | 418598, | 2381.1775, |
| 5.962414 |         |            | 5.956533 |         |            | 5.950653 |         |            |
| 24630,   | 406804, | 2385.8220, | 24668,   | 412254, | 2383.4688, | 24706,   | 418298, | 2381.1155, |
| 5.962259 |         |            | 5.956379 |         |            | 5.950498 |         |            |
| 24631,   | 406034, | 2385.7601, | 24669,   | 412810, | 2383.4068, | 24707,   | 418346, | 2381.0536, |
| 5.962105 |         |            | 5.956224 |         |            | 5.950343 |         |            |
| 24632,   | 405574, | 2385.6981, | 24670,   | 413538, | 2383.3449, | 24708,   | 418744, | 2380.9917, |
| 5.961950 |         |            | 5.956069 |         |            | 5.950188 |         |            |

|          |         |            |          |         |            |          |         |            |
|----------|---------|------------|----------|---------|------------|----------|---------|------------|
| 24709,   | 419000, | 2380.9298, | 24747,   | 415460, | 2378.5765, | 24785,   | 420444, | 2376.2233, |
| 5.950034 |         |            | 5.944153 |         |            | 5.938272 |         |            |
| 24710,   | 418648, | 2380.8678, | 24748,   | 415258, | 2378.5146, | 24786,   | 420810, | 2376.1614, |
| 5.949879 |         |            | 5.943998 |         |            | 5.938117 |         |            |
| 24711,   | 417856, | 2380.8059, | 24749,   | 414794, | 2378.4527, | 24787,   | 420622, | 2376.0995, |
| 5.949724 |         |            | 5.943843 |         |            | 5.937963 |         |            |
| 24712,   | 417270, | 2380.7440, | 24750,   | 414742, | 2378.3908, | 24788,   | 420218, | 2376.0375, |
| 5.949569 |         |            | 5.943689 |         |            | 5.937808 |         |            |
| 24713,   | 417370, | 2380.6821, | 24751,   | 415434, | 2378.3288, | 24789,   | 419938, | 2375.9756, |
| 5.949415 |         |            | 5.943534 |         |            | 5.937653 |         |            |
| 24714,   | 417940, | 2380.6201, | 24752,   | 416518, | 2378.2669, | 24790,   | 419748, | 2375.9137, |
| 5.949260 |         |            | 5.943379 |         |            | 5.937498 |         |            |
| 24715,   | 418332, | 2380.5582, | 24753,   | 417372, | 2378.2050, | 24791,   | 419452, | 2375.8518, |
| 5.949105 |         |            | 5.943224 |         |            | 5.937344 |         |            |
| 24716,   | 418180, | 2380.4963, | 24754,   | 417770, | 2378.1430, | 24792,   | 419112, | 2375.7898, |
| 5.948950 |         |            | 5.943070 |         |            | 5.937189 |         |            |
| 24717,   | 417806, | 2380.4343, | 24755,   | 418066, | 2378.0811, | 24793,   | 419074, | 2375.7279, |
| 5.948796 |         |            | 5.942915 |         |            | 5.937034 |         |            |
| 24718,   | 417780, | 2380.3724, | 24756,   | 418666, | 2378.0192, | 24794,   | 419508, | 2375.6660, |
| 5.948641 |         |            | 5.942760 |         |            | 5.936879 |         |            |
| 24719,   | 418276, | 2380.3105, | 24757,   | 419468, | 2377.9573, | 24795,   | 420064, | 2375.6040, |
| 5.948486 |         |            | 5.942605 |         |            | 5.936724 |         |            |
| 24720,   | 418808, | 2380.2486, | 24758,   | 419940, | 2377.8953, | 24796,   | 420162, | 2375.5421, |
| 5.948331 |         |            | 5.942451 |         |            | 5.936570 |         |            |
| 24721,   | 418778, | 2380.1866, | 24759,   | 419766, | 2377.8334, | 24797,   | 419686, | 2375.4802, |
| 5.948177 |         |            | 5.942296 |         |            | 5.936415 |         |            |
| 24722,   | 418074, | 2380.1247, | 24760,   | 419254, | 2377.7715, | 24798,   | 419204, | 2375.4183, |
| 5.948022 |         |            | 5.942141 |         |            | 5.936260 |         |            |
| 24723,   | 417104, | 2380.0628, | 24761,   | 419076, | 2377.7096, | 24799,   | 419426, | 2375.3563, |
| 5.947867 |         |            | 5.941986 |         |            | 5.936105 |         |            |
| 24724,   | 416298, | 2380.0009, | 24762,   | 419534, | 2377.6476, | 24800,   | 420366, | 2375.2944, |
| 5.947712 |         |            | 5.941831 |         |            | 5.935951 |         |            |
| 24725,   | 415694, | 2379.9389, | 24763,   | 420272, | 2377.5857, | 24801,   | 421278, | 2375.2325, |
| 5.947558 |         |            | 5.941677 |         |            | 5.935796 |         |            |
| 24726,   | 415076, | 2379.8770, | 24764,   | 420704, | 2377.5238, | 24802,   | 421400, | 2375.1706, |
| 5.947403 |         |            | 5.941522 |         |            | 5.935641 |         |            |
| 24727,   | 414428, | 2379.8151, | 24765,   | 420680, | 2377.4619, | 24803,   | 420760, | 2375.1086, |
| 5.947248 |         |            | 5.941367 |         |            | 5.935486 |         |            |
| 24728,   | 414064, | 2379.7531, | 24766,   | 420576, | 2377.3999, | 24804,   | 420148, | 2375.0467, |
| 5.947093 |         |            | 5.941212 |         |            | 5.935332 |         |            |
| 24729,   | 414254, | 2379.6912, | 24767,   | 420772, | 2377.3380, | 24805,   | 420258, | 2374.9848, |
| 5.946938 |         |            | 5.941058 |         |            | 5.935177 |         |            |
| 24730,   | 414818, | 2379.6293, | 24768,   | 421192, | 2377.2761, | 24806,   | 420954, | 2374.9228, |
| 5.946784 |         |            | 5.940903 |         |            | 5.935022 |         |            |
| 24731,   | 415228, | 2379.5674, | 24769,   | 421396, | 2377.2141, | 24807,   | 421478, | 2374.8609, |
| 5.946629 |         |            | 5.940748 |         |            | 5.934867 |         |            |
| 24732,   | 415158, | 2379.5054, | 24770,   | 421176, | 2377.1522, | 24808,   | 421332, | 2374.7990, |
| 5.946474 |         |            | 5.940593 |         |            | 5.934713 |         |            |
| 24733,   | 414834, | 2379.4435, | 24771,   | 420844, | 2377.0903, | 24809,   | 420816, | 2374.7371, |
| 5.946319 |         |            | 5.940439 |         |            | 5.934558 |         |            |
| 24734,   | 414804, | 2379.3816, | 24772,   | 420880, | 2377.0284, | 24810,   | 420692, | 2374.6751, |
| 5.946165 |         |            | 5.940284 |         |            | 5.934403 |         |            |
| 24735,   | 415322, | 2379.3197, | 24773,   | 421356, | 2376.9664, | 24811,   | 421310, | 2374.6132, |
| 5.946010 |         |            | 5.940129 |         |            | 5.934248 |         |            |
| 24736,   | 416096, | 2379.2577, | 24774,   | 421850, | 2376.9045, | 24812,   | 422286, | 2374.5513, |
| 5.945855 |         |            | 5.939974 |         |            | 5.934094 |         |            |
| 24737,   | 416596, | 2379.1958, | 24775,   | 421984, | 2376.8426, | 24813,   | 422950, | 2374.4894, |
| 5.945700 |         |            | 5.939820 |         |            | 5.933939 |         |            |
| 24738,   | 416616, | 2379.1339, | 24776,   | 421898, | 2376.7807, | 24814,   | 423090, | 2374.4274, |
| 5.945546 |         |            | 5.939665 |         |            | 5.933784 |         |            |
| 24739,   | 416364, | 2379.0720, | 24777,   | 422060, | 2376.7187, | 24815,   | 423074, | 2374.3655, |
| 5.945391 |         |            | 5.939510 |         |            | 5.933629 |         |            |
| 24740,   | 416088, | 2379.0100, | 24778,   | 422622, | 2376.6568, | 24816,   | 423342, | 2374.3036, |
| 5.945236 |         |            | 5.939355 |         |            | 5.933475 |         |            |
| 24741,   | 415778, | 2378.9481, | 24779,   | 423080, | 2376.5949, | 24817,   | 423900, | 2374.2417, |
| 5.945081 |         |            | 5.939201 |         |            | 5.933320 |         |            |
| 24742,   | 415266, | 2378.8862, | 24780,   | 422740, | 2376.5329, | 24818,   | 424386, | 2374.1797, |
| 5.944927 |         |            | 5.939046 |         |            | 5.933165 |         |            |
| 24743,   | 414636, | 2378.8242, | 24781,   | 421508, | 2376.4710, | 24819,   | 424552, | 2374.1178, |
| 5.944772 |         |            | 5.938891 |         |            | 5.933010 |         |            |
| 24744,   | 414280, | 2378.7623, | 24782,   | 420110, | 2376.4091, | 24820,   | 424498, | 2374.0559, |
| 5.944617 |         |            | 5.938736 |         |            | 5.932856 |         |            |
| 24745,   | 414498, | 2378.7004, | 24783,   | 419438, | 2376.3472, | 24821,   | 424418, | 2373.9939, |
| 5.944462 |         |            | 5.938582 |         |            | 5.932701 |         |            |
| 24746,   | 415086, | 2378.6385, | 24784,   | 419742, | 2376.2852, | 24822,   | 424236, | 2373.9320, |
| 5.944308 |         |            | 5.938427 |         |            | 5.932546 |         |            |

|          |         |            |          |         |            |          |         |            |
|----------|---------|------------|----------|---------|------------|----------|---------|------------|
| 24823,   | 423704, | 2373.8701, | 24861,   | 426050, | 2371.5169, | 24899,   | 427548, | 2369.1636, |
| 5.932391 |         |            | 5.926510 |         |            | 5.920630 |         |            |
| 24824,   | 422834, | 2373.8082, | 24862,   | 425372, | 2371.4549, | 24900,   | 427156, | 2369.1017, |
| 5.932236 |         |            | 5.926356 |         |            | 5.920475 |         |            |
| 24825,   | 422134, | 2373.7462, | 24863,   | 425078, | 2371.3930, | 24901,   | 426268, | 2369.0398, |
| 5.932082 |         |            | 5.926201 |         |            | 5.920320 |         |            |
| 24826,   | 422162, | 2373.6843, | 24864,   | 425476, | 2371.3311, | 24902,   | 425700, | 2368.9779, |
| 5.931927 |         |            | 5.926046 |         |            | 5.920165 |         |            |
| 24827,   | 422916, | 2373.6224, | 24865,   | 426344, | 2371.2692, | 24903,   | 425962, | 2368.9159, |
| 5.931772 |         |            | 5.925891 |         |            | 5.920011 |         |            |
| 24828,   | 423738, | 2373.5605, | 24866,   | 426996, | 2371.2072, | 24904,   | 426734, | 2368.8540, |
| 5.931617 |         |            | 5.925737 |         |            | 5.919856 |         |            |
| 24829,   | 423962, | 2373.4985, | 24867,   | 426942, | 2371.1453, | 24905,   | 427284, | 2368.7921, |
| 5.931463 |         |            | 5.925582 |         |            | 5.919701 |         |            |
| 24830,   | 423594, | 2373.4366, | 24868,   | 426378, | 2371.0834, | 24906,   | 427240, | 2368.7302, |
| 5.931308 |         |            | 5.925427 |         |            | 5.919546 |         |            |
| 24831,   | 423294, | 2373.3747, | 24869,   | 425952, | 2371.0215, | 24907,   | 426938, | 2368.6682, |
| 5.931153 |         |            | 5.925272 |         |            | 5.919392 |         |            |
| 24832,   | 423574, | 2373.3127, | 24870,   | 426042, | 2370.9595, | 24908,   | 426916, | 2368.6063, |
| 5.930998 |         |            | 5.925118 |         |            | 5.919237 |         |            |
| 24833,   | 424244, | 2373.2508, | 24871,   | 426350, | 2370.8976, | 24909,   | 427306, | 2368.5444, |
| 5.930844 |         |            | 5.924963 |         |            | 5.919082 |         |            |
| 24834,   | 424606, | 2373.1889, | 24872,   | 426292, | 2370.8357, | 24910,   | 427744, | 2368.4825, |
| 5.930689 |         |            | 5.924808 |         |            | 5.918927 |         |            |
| 24835,   | 424290, | 2373.1270, | 24873,   | 425766, | 2370.7737, | 24911,   | 427878, | 2368.4205, |
| 5.930534 |         |            | 5.924653 |         |            | 5.918773 |         |            |
| 24836,   | 423696, | 2373.0650, | 24874,   | 425338, | 2370.7118, | 24912,   | 427782, | 2368.3586, |
| 5.930379 |         |            | 5.924499 |         |            | 5.918618 |         |            |
| 24837,   | 423560, | 2373.0031, | 24875,   | 425626, | 2370.6499, | 24913,   | 427786, | 2368.2967, |
| 5.930225 |         |            | 5.924344 |         |            | 5.918463 |         |            |
| 24838,   | 424162, | 2372.9412, | 24876,   | 426550, | 2370.5880, | 24914,   | 428026, | 2368.2347, |
| 5.930070 |         |            | 5.924189 |         |            | 5.918308 |         |            |
| 24839,   | 425016, | 2372.8793, | 24877,   | 427354, | 2370.5260, | 24915,   | 428250, | 2368.1728, |
| 5.929915 |         |            | 5.924034 |         |            | 5.918154 |         |            |
| 24840,   | 425452, | 2372.8173, | 24878,   | 427368, | 2370.4641, | 24916,   | 428186, | 2368.1109, |
| 5.929760 |         |            | 5.923880 |         |            | 5.917999 |         |            |
| 24841,   | 425340, | 2372.7554, | 24879,   | 426704, | 2370.4022, | 24917,   | 427934, | 2368.0490, |
| 5.929606 |         |            | 5.923725 |         |            | 5.917844 |         |            |
| 24842,   | 425134, | 2372.6935, | 24880,   | 426056, | 2370.3403, | 24918,   | 427888, | 2367.9870, |
| 5.929451 |         |            | 5.923570 |         |            | 5.917689 |         |            |
| 24843,   | 425248, | 2372.6316, | 24881,   | 425884, | 2370.2783, | 24919,   | 428258, | 2367.9251, |
| 5.929296 |         |            | 5.923415 |         |            | 5.917535 |         |            |
| 24844,   | 425540, | 2372.5696, | 24882,   | 425930, | 2370.2164, | 24920,   | 428808, | 2367.8632, |
| 5.929141 |         |            | 5.923261 |         |            | 5.917380 |         |            |
| 24845,   | 425494, | 2372.5077, | 24883,   | 425598, | 2370.1545, | 24921,   | 429130, | 2367.8013, |
| 5.928987 |         |            | 5.923106 |         |            | 5.917225 |         |            |
| 24846,   | 424918, | 2372.4458, | 24884,   | 424750, | 2370.0925, | 24922,   | 429174, | 2367.7393, |
| 5.928832 |         |            | 5.922951 |         |            | 5.917070 |         |            |
| 24847,   | 424236, | 2372.3838, | 24885,   | 423922, | 2370.0306, | 24923,   | 429356, | 2367.6774, |
| 5.928677 |         |            | 5.922796 |         |            | 5.916915 |         |            |
| 24848,   | 424042, | 2372.3219, | 24886,   | 423712, | 2369.9687, | 24924,   | 430066, | 2367.6155, |
| 5.928522 |         |            | 5.922642 |         |            | 5.916761 |         |            |
| 24849,   | 424402, | 2372.2600, | 24887,   | 424096, | 2369.9068, | 24925,   | 431146, | 2367.5535, |
| 5.928368 |         |            | 5.922487 |         |            | 5.916606 |         |            |
| 24850,   | 424760, | 2372.1981, | 24888,   | 424458, | 2369.8448, | 24926,   | 431936, | 2367.4916, |
| 5.928213 |         |            | 5.922332 |         |            | 5.916451 |         |            |
| 24851,   | 424566, | 2372.1361, | 24889,   | 424358, | 2369.7829, | 24927,   | 431916, | 2367.4297, |
| 5.928058 |         |            | 5.922177 |         |            | 5.916296 |         |            |
| 24852,   | 423924, | 2372.0742, | 24890,   | 424078, | 2369.7210, | 24928,   | 431202, | 2367.3678, |
| 5.927903 |         |            | 5.922022 |         |            | 5.916142 |         |            |
| 24853,   | 423536, | 2372.0123, | 24891,   | 424318, | 2369.6591, | 24929,   | 430400, | 2367.3058, |
| 5.927749 |         |            | 5.921868 |         |            | 5.915987 |         |            |
| 24854,   | 423982, | 2371.9504, | 24892,   | 425332, | 2369.5971, | 24930,   | 429994, | 2367.2439, |
| 5.927594 |         |            | 5.921713 |         |            | 5.915832 |         |            |
| 24855,   | 425146, | 2371.8884, | 24893,   | 426554, | 2369.5352, | 24931,   | 429944, | 2367.1820, |
| 5.927439 |         |            | 5.921558 |         |            | 5.915677 |         |            |
| 24856,   | 426378, | 2371.8265, | 24894,   | 427154, | 2369.4733, | 24932,   | 429912, | 2367.1201, |
| 5.927284 |         |            | 5.921403 |         |            | 5.915523 |         |            |
| 24857,   | 427124, | 2371.7646, | 24895,   | 426938, | 2369.4114, | 24933,   | 429730, | 2367.0581, |
| 5.927129 |         |            | 5.921249 |         |            | 5.915368 |         |            |
| 24858,   | 427298, | 2371.7026, | 24896,   | 426522, | 2369.3494, | 24934,   | 429534, | 2366.9962, |
| 5.926975 |         |            | 5.921094 |         |            | 5.915213 |         |            |
| 24859,   | 427110, | 2371.6407, | 24897,   | 426608, | 2369.2875, | 24935,   | 429516, | 2366.9343, |
| 5.926820 |         |            | 5.920939 |         |            | 5.915058 |         |            |
| 24860,   | 426688, | 2371.5788, | 24898,   | 427184, | 2369.2256, | 24936,   | 429620, | 2366.8724, |
| 5.926665 |         |            | 5.920784 |         |            | 5.914904 |         |            |

|          |         |            |          |         |            |          |         |            |
|----------|---------|------------|----------|---------|------------|----------|---------|------------|
| 24937,   | 429670, | 2366.8104, | 24975,   | 431524, | 2364.4572, | 25013,   | 432566, | 2362.1040, |
| 5.914749 |         |            | 5.908868 |         |            | 5.902987 |         |            |
| 24938,   | 429698, | 2366.7485, | 24976,   | 431404, | 2364.3953, | 25014,   | 432278, | 2362.0421, |
| 5.914594 |         |            | 5.908713 |         |            | 5.902833 |         |            |
| 24939,   | 430018, | 2366.6866, | 24977,   | 431330, | 2364.3333, | 25015,   | 432374, | 2361.9801, |
| 5.914439 |         |            | 5.908559 |         |            | 5.902678 |         |            |
| 24940,   | 430834, | 2366.6246, | 24978,   | 431730, | 2364.2714, | 25016,   | 433302, | 2361.9182, |
| 5.914285 |         |            | 5.908404 |         |            | 5.902523 |         |            |
| 24941,   | 431860, | 2366.5627, | 24979,   | 432566, | 2364.2095, | 25017,   | 434742, | 2361.8563, |
| 5.914130 |         |            | 5.908249 |         |            | 5.902368 |         |            |
| 24942,   | 432442, | 2366.5008, | 24980,   | 433314, | 2364.1476, | 25018,   | 435858, | 2361.7943, |
| 5.913975 |         |            | 5.908094 |         |            | 5.902214 |         |            |
| 24943,   | 432152, | 2366.4389, | 24981,   | 433558, | 2364.0856, | 25019,   | 436104, | 2361.7324, |
| 5.913820 |         |            | 5.907940 |         |            | 5.902059 |         |            |
| 24944,   | 431214, | 2366.3769, | 24982,   | 433440, | 2364.0237, | 25020,   | 435768, | 2361.6705, |
| 5.913666 |         |            | 5.907785 |         |            | 5.901904 |         |            |
| 24945,   | 430328, | 2366.3150, | 24983,   | 433456, | 2363.9618, | 25021,   | 435582, | 2361.6086, |
| 5.913511 |         |            | 5.907630 |         |            | 5.901749 |         |            |
| 24946,   | 429988, | 2366.2531, | 24984,   | 433846, | 2363.8999, | 25022,   | 435918, | 2361.5466, |
| 5.913356 |         |            | 5.907475 |         |            | 5.901594 |         |            |
| 24947,   | 430128, | 2366.1912, | 24985,   | 434330, | 2363.8379, | 25023,   | 436454, | 2361.4847, |
| 5.913201 |         |            | 5.907321 |         |            | 5.901440 |         |            |
| 24948,   | 430346, | 2366.1292, | 24986,   | 434520, | 2363.7760, | 25024,   | 436670, | 2361.4228, |
| 5.913047 |         |            | 5.907166 |         |            | 5.901285 |         |            |
| 24949,   | 430426, | 2366.0673, | 24987,   | 434458, | 2363.7141, | 25025,   | 436526, | 2361.3609, |
| 5.912892 |         |            | 5.907011 |         |            | 5.901130 |         |            |
| 24950,   | 430492, | 2366.0054, | 24988,   | 434568, | 2363.6522, | 25026,   | 436508, | 2361.2989, |
| 5.912737 |         |            | 5.906856 |         |            | 5.900975 |         |            |
| 24951,   | 430686, | 2365.9434, | 24989,   | 435072, | 2363.5902, | 25027,   | 436986, | 2361.2370, |
| 5.912582 |         |            | 5.906701 |         |            | 5.900821 |         |            |
| 24952,   | 430858, | 2365.8815, | 24990,   | 435582, | 2363.5283, | 25028,   | 437700, | 2361.1751, |
| 5.912428 |         |            | 5.906547 |         |            | 5.900666 |         |            |
| 24953,   | 430720, | 2365.8196, | 24991,   | 435426, | 2363.4664, | 25029,   | 437986, | 2361.1131, |
| 5.912273 |         |            | 5.906392 |         |            | 5.900511 |         |            |
| 24954,   | 430258, | 2365.7577, | 24992,   | 434454, | 2363.4044, | 25030,   | 437574, | 2361.0512, |
| 5.912118 |         |            | 5.906237 |         |            | 5.900356 |         |            |
| 24955,   | 429912, | 2365.6957, | 24993,   | 433318, | 2363.3425, | 25031,   | 436952, | 2360.9893, |
| 5.911963 |         |            | 5.906082 |         |            | 5.900202 |         |            |
| 24956,   | 430102, | 2365.6338, | 24994,   | 432896, | 2363.2806, | 25032,   | 436870, | 2360.9274, |
| 5.911808 |         |            | 5.905928 |         |            | 5.900047 |         |            |
| 24957,   | 430754, | 2365.5719, | 24995,   | 433418, | 2363.2187, | 25033,   | 437528, | 2360.8654, |
| 5.911654 |         |            | 5.905773 |         |            | 5.899892 |         |            |
| 24958,   | 431318, | 2365.5100, | 24996,   | 434276, | 2363.1567, | 25034,   | 438336, | 2360.8035, |
| 5.911499 |         |            | 5.905618 |         |            | 5.899737 |         |            |
| 24959,   | 431384, | 2365.4480, | 24997,   | 434692, | 2363.0948, | 25035,   | 438578, | 2360.7416, |
| 5.911344 |         |            | 5.905463 |         |            | 5.899583 |         |            |
| 24960,   | 431196, | 2365.3861, | 24998,   | 434562, | 2363.0329, | 25036,   | 438116, | 2360.6797, |
| 5.911189 |         |            | 5.905309 |         |            | 5.899428 |         |            |
| 24961,   | 431394, | 2365.3242, | 24999,   | 434460, | 2362.9710, | 25037,   | 437460, | 2360.6177, |
| 5.911035 |         |            | 5.905154 |         |            | 5.899273 |         |            |
| 24962,   | 432280, | 2365.2623, | 25000,   | 434924, | 2362.9090, | 25038,   | 437080, | 2360.5558, |
| 5.910880 |         |            | 5.904999 |         |            | 5.899118 |         |            |
| 24963,   | 433386, | 2365.2003, | 25001,   | 435776, | 2362.8471, | 25039,   | 436884, | 2360.4939, |
| 5.910725 |         |            | 5.904844 |         |            | 5.898964 |         |            |
| 24964,   | 433926, | 2365.1384, | 25002,   | 436306, | 2362.7852, | 25040,   | 436442, | 2360.4320, |
| 5.910570 |         |            | 5.904690 |         |            | 5.898809 |         |            |
| 24965,   | 433610, | 2365.0765, | 25003,   | 436038, | 2362.7232, | 25041,   | 435658, | 2360.3700, |
| 5.910416 |         |            | 5.904535 |         |            | 5.898654 |         |            |
| 24966,   | 432956, | 2365.0145, | 25004,   | 435162, | 2362.6613, | 25042,   | 435046, | 2360.3081, |
| 5.910261 |         |            | 5.904380 |         |            | 5.898499 |         |            |
| 24967,   | 432696, | 2364.9526, | 25005,   | 434260, | 2362.5994, | 25043,   | 435212, | 2360.2462, |
| 5.910106 |         |            | 5.904225 |         |            | 5.898345 |         |            |
| 24968,   | 432984, | 2364.8907, | 25006,   | 433662, | 2362.5375, | 25044,   | 436130, | 2360.1842, |
| 5.909951 |         |            | 5.904071 |         |            | 5.898190 |         |            |
| 24969,   | 433258, | 2364.8288, | 25007,   | 433212, | 2362.4755, | 25045,   | 437082, | 2360.1223, |
| 5.909797 |         |            | 5.903916 |         |            | 5.898035 |         |            |
| 24970,   | 432938, | 2364.7668, | 25008,   | 432678, | 2362.4136, | 25046,   | 437386, | 2360.0604, |
| 5.909642 |         |            | 5.903761 |         |            | 5.897880 |         |            |
| 24971,   | 432072, | 2364.7049, | 25009,   | 432172, | 2362.3517, | 25047,   | 437064, | 2359.9985, |
| 5.909487 |         |            | 5.903606 |         |            | 5.897726 |         |            |
| 24972,   | 431290, | 2364.6430, | 25010,   | 432022, | 2362.2898, | 25048,   | 436800, | 2359.9365, |
| 5.909332 |         |            | 5.903452 |         |            | 5.897571 |         |            |
| 24973,   | 431100, | 2364.5811, | 25011,   | 432302, | 2362.2278, | 25049,   | 437166, | 2359.8746, |
| 5.909178 |         |            | 5.903297 |         |            | 5.897416 |         |            |
| 24974,   | 431350, | 2364.5191, | 25012,   | 432620, | 2362.1659, | 25050,   | 438054, | 2359.8127, |
| 5.909023 |         |            | 5.903142 |         |            | 5.897261 |         |            |

|          |         |            |          |         |            |          |         |            |
|----------|---------|------------|----------|---------|------------|----------|---------|------------|
| 25051,   | 438894, | 2359.7508, | 25089,   | 440368, | 2357.3975, | 25127,   | 444140, | 2355.0443, |
| 5.897107 |         |            | 5.891226 |         |            | 5.885345 |         |            |
| 25052,   | 439328, | 2359.6888, | 25090,   | 439930, | 2357.3356, | 25128,   | 443960, | 2354.9824, |
| 5.896952 |         |            | 5.891071 |         |            | 5.885190 |         |            |
| 25053,   | 439586, | 2359.6269, | 25091,   | 439584, | 2357.2737, | 25129,   | 443544, | 2354.9205, |
| 5.896797 |         |            | 5.890916 |         |            | 5.885035 |         |            |
| 25054,   | 440128, | 2359.5650, | 25092,   | 439732, | 2357.2118, | 25130,   | 443492, | 2354.8585, |
| 5.896642 |         |            | 5.890761 |         |            | 5.884881 |         |            |
| 25055,   | 441028, | 2359.5030, | 25093,   | 440190, | 2357.1498, | 25131,   | 443880, | 2354.7966, |
| 5.896487 |         |            | 5.890607 |         |            | 5.884726 |         |            |
| 25056,   | 441868, | 2359.4411, | 25094,   | 440480, | 2357.0879, | 25132,   | 444320, | 2354.7347, |
| 5.896333 |         |            | 5.890452 |         |            | 5.884571 |         |            |
| 25057,   | 442192, | 2359.3792, | 25095,   | 440496, | 2357.0260, | 25133,   | 444490, | 2354.6728, |
| 5.896178 |         |            | 5.890297 |         |            | 5.884416 |         |            |
| 25058,   | 441986, | 2359.3173, | 25096,   | 440634, | 2356.9640, | 25134,   | 444488, | 2354.6108, |
| 5.896023 |         |            | 5.890142 |         |            | 5.884262 |         |            |
| 25059,   | 441654, | 2359.2553, | 25097,   | 441280, | 2356.9021, | 25135,   | 444596, | 2354.5489, |
| 5.895868 |         |            | 5.889988 |         |            | 5.884107 |         |            |
| 25060,   | 441540, | 2359.1934, | 25098,   | 442216, | 2356.8402, | 25136,   | 444814, | 2354.4870, |
| 5.895714 |         |            | 5.889833 |         |            | 5.883952 |         |            |
| 25061,   | 441634, | 2359.1315, | 25099,   | 442732, | 2356.7783, | 25137,   | 444868, | 2354.4250, |
| 5.895559 |         |            | 5.889678 |         |            | 5.883797 |         |            |
| 25062,   | 441728, | 2359.0696, | 25100,   | 442408, | 2356.7163, | 25138,   | 444624, | 2354.3631, |
| 5.895404 |         |            | 5.889523 |         |            | 5.883643 |         |            |
| 25063,   | 441772, | 2359.0076, | 25101,   | 441606, | 2356.6544, | 25139,   | 444414, | 2354.3012, |
| 5.895249 |         |            | 5.889369 |         |            | 5.883488 |         |            |
| 25064,   | 441922, | 2358.9457, | 25102,   | 441108, | 2356.5925, | 25140,   | 444746, | 2354.2393, |
| 5.895095 |         |            | 5.889214 |         |            | 5.883333 |         |            |
| 25065,   | 442248, | 2358.8838, | 25103,   | 441260, | 2356.5306, | 25141,   | 445684, | 2354.1773, |
| 5.894940 |         |            | 5.889059 |         |            | 5.883178 |         |            |
| 25066,   | 442522, | 2358.8219, | 25104,   | 441582, | 2356.4686, | 25142,   | 446710, | 2354.1154, |
| 5.894785 |         |            | 5.888904 |         |            | 5.883024 |         |            |
| 25067,   | 442392, | 2358.7599, | 25105,   | 441312, | 2356.4067, | 25143,   | 447226, | 2354.0535, |
| 5.894630 |         |            | 5.888750 |         |            | 5.882869 |         |            |
| 25068,   | 441804, | 2358.6980, | 25106,   | 440288, | 2356.3448, | 25144,   | 447202, | 2353.9916, |
| 5.894476 |         |            | 5.888595 |         |            | 5.882714 |         |            |
| 25069,   | 441046, | 2358.6361, | 25107,   | 439136, | 2356.2828, | 25145,   | 447186, | 2353.9296, |
| 5.894321 |         |            | 5.888440 |         |            | 5.882559 |         |            |
| 25070,   | 440430, | 2358.5741, | 25108,   | 438588, | 2356.2209, | 25146,   | 447604, | 2353.8677, |
| 5.894166 |         |            | 5.888285 |         |            | 5.882405 |         |            |
| 25071,   | 439940, | 2358.5122, | 25109,   | 438700, | 2356.1590, | 25147,   | 448210, | 2353.8058, |
| 5.894011 |         |            | 5.888131 |         |            | 5.882250 |         |            |
| 25072,   | 439304, | 2358.4503, | 25110,   | 438874, | 2356.0971, | 25148,   | 448340, | 2353.7438, |
| 5.893857 |         |            | 5.887976 |         |            | 5.882095 |         |            |
| 25073,   | 438424, | 2358.3884, | 25111,   | 438628, | 2356.0351, | 25149,   | 447712, | 2353.6819, |
| 5.893702 |         |            | 5.887821 |         |            | 5.881940 |         |            |
| 25074,   | 437608, | 2358.3264, | 25112,   | 438190, | 2355.9732, | 25150,   | 446872, | 2353.6200, |
| 5.893547 |         |            | 5.887666 |         |            | 5.881785 |         |            |
| 25075,   | 437280, | 2358.2645, | 25113,   | 438202, | 2355.9113, | 25151,   | 446654, | 2353.5581, |
| 5.893392 |         |            | 5.887512 |         |            | 5.881631 |         |            |
| 25076,   | 437488, | 2358.2026, | 25114,   | 438922, | 2355.8494, | 25152,   | 447272, | 2353.4961, |
| 5.893238 |         |            | 5.887357 |         |            | 5.881476 |         |            |
| 25077,   | 437814, | 2358.1407, | 25115,   | 439862, | 2355.7874, | 25153,   | 448016, | 2353.4342, |
| 5.893083 |         |            | 5.887202 |         |            | 5.881321 |         |            |
| 25078,   | 437860, | 2358.0787, | 25116,   | 440306, | 2355.7255, | 25154,   | 447986, | 2353.3723, |
| 5.892928 |         |            | 5.887047 |         |            | 5.881166 |         |            |
| 25079,   | 437726, | 2358.0168, | 25117,   | 440098, | 2355.6636, | 25155,   | 447028, | 2353.3104, |
| 5.892773 |         |            | 5.886892 |         |            | 5.881012 |         |            |
| 25080,   | 437888, | 2357.9549, | 25118,   | 439786, | 2355.6017, | 25156,   | 445882, | 2353.2484, |
| 5.892619 |         |            | 5.886738 |         |            | 5.880857 |         |            |
| 25081,   | 438604, | 2357.8929, | 25119,   | 439976, | 2355.5397, | 25157,   | 445408, | 2353.1865, |
| 5.892464 |         |            | 5.886583 |         |            | 5.880702 |         |            |
| 25082,   | 439516, | 2357.8310, | 25120,   | 440622, | 2355.4778, | 25158,   | 445672, | 2353.1246, |
| 5.892309 |         |            | 5.886428 |         |            | 5.880547 |         |            |
| 25083,   | 439978, | 2357.7691, | 25121,   | 441162, | 2355.4159, | 25159,   | 445972, | 2353.0627, |
| 5.892154 |         |            | 5.886273 |         |            | 5.880393 |         |            |
| 25084,   | 439760, | 2357.7072, | 25122,   | 441212, | 2355.3539, | 25160,   | 445636, | 2353.0007, |
| 5.892000 |         |            | 5.886119 |         |            | 5.880238 |         |            |
| 25085,   | 439322, | 2357.6452, | 25123,   | 441082, | 2355.2920, | 25161,   | 444714, | 2352.9388, |
| 5.891845 |         |            | 5.885964 |         |            | 5.880083 |         |            |
| 25086,   | 439296, | 2357.5833, | 25124,   | 441416, | 2355.2301, | 25162,   | 443848, | 2352.8769, |
| 5.891690 |         |            | 5.885809 |         |            | 5.879928 |         |            |
| 25087,   | 439808, | 2357.5214, | 25125,   | 442422, | 2355.1682, | 25163,   | 443524, | 2352.8149, |
| 5.891535 |         |            | 5.885654 |         |            | 5.879774 |         |            |
| 25088,   | 440346, | 2357.4595, | 25126,   | 443570, | 2355.1062, | 25164,   | 443604, | 2352.7530, |
| 5.891380 |         |            | 5.885500 |         |            | 5.879619 |         |            |



|          |         |            |          |         |            |          |         |            |
|----------|---------|------------|----------|---------|------------|----------|---------|------------|
| 25165,   | 443628, | 2352.6911, | 25203,   | 445632, | 2350.3379, | 25241,   | 449868, | 2347.9846, |
| 5.879464 |         |            | 5.873583 |         |            | 5.867703 |         |            |
| 25166,   | 443392, | 2352.6292, | 25204,   | 445676, | 2350.2759, | 25242,   | 449262, | 2347.9227, |
| 5.879309 |         |            | 5.873429 |         |            | 5.867548 |         |            |
| 25167,   | 443158, | 2352.5672, | 25205,   | 445866, | 2350.2140, | 25243,   | 448952, | 2347.8608, |
| 5.879155 |         |            | 5.873274 |         |            | 5.867393 |         |            |
| 25168,   | 443216, | 2352.5053, | 25206,   | 446506, | 2350.1521, | 25244,   | 449232, | 2347.7989, |
| 5.879000 |         |            | 5.873119 |         |            | 5.867238 |         |            |
| 25169,   | 443440, | 2352.4434, | 25207,   | 447394, | 2350.0902, | 25245,   | 449638, | 2347.7369, |
| 5.878845 |         |            | 5.872964 |         |            | 5.867084 |         |            |
| 25170,   | 443378, | 2352.3815, | 25208,   | 448048, | 2350.0282, | 25246,   | 449546, | 2347.6750, |
| 5.878690 |         |            | 5.872810 |         |            | 5.866929 |         |            |
| 25171,   | 442762, | 2352.3195, | 25209,   | 448270, | 2349.9663, | 25247,   | 448932, | 2347.6131, |
| 5.878536 |         |            | 5.872655 |         |            | 5.866774 |         |            |
| 25172,   | 441882, | 2352.2576, | 25210,   | 448300, | 2349.9044, | 25248,   | 448438, | 2347.5512, |
| 5.878381 |         |            | 5.872500 |         |            | 5.866619 |         |            |
| 25173,   | 441334, | 2352.1957, | 25211,   | 448440, | 2349.8425, | 25249,   | 448644, | 2347.4892, |
| 5.878226 |         |            | 5.872345 |         |            | 5.866464 |         |            |
| 25174,   | 441468, | 2352.1337, | 25212,   | 448600, | 2349.7805, | 25250,   | 449370, | 2347.4273, |
| 5.878071 |         |            | 5.872191 |         |            | 5.866310 |         |            |
| 25175,   | 442150, | 2352.0718, | 25213,   | 448462, | 2349.7186, | 25251,   | 449816, | 2347.3654, |
| 5.877917 |         |            | 5.872036 |         |            | 5.866155 |         |            |
| 25176,   | 442990, | 2352.0099, | 25214,   | 447938, | 2349.6567, | 25252,   | 449418, | 2347.3034, |
| 5.877762 |         |            | 5.871881 |         |            | 5.866000 |         |            |
| 25177,   | 443742, | 2351.9480, | 25215,   | 447420, | 2349.5947, | 25253,   | 448466, | 2347.2415, |
| 5.877607 |         |            | 5.871726 |         |            | 5.865845 |         |            |
| 25178,   | 444366, | 2351.8860, | 25216,   | 447402, | 2349.5328, | 25254,   | 447838, | 2347.1796, |
| 5.877452 |         |            | 5.871571 |         |            | 5.865691 |         |            |
| 25179,   | 444842, | 2351.8241, | 25217,   | 447916, | 2349.4709, | 25255,   | 448138, | 2347.1177, |
| 5.877298 |         |            | 5.871417 |         |            | 5.865536 |         |            |
| 25180,   | 445058, | 2351.7622, | 25218,   | 448462, | 2349.4090, | 25256,   | 449134, | 2347.0557, |
| 5.877143 |         |            | 5.871262 |         |            | 5.865381 |         |            |
| 25181,   | 444984, | 2351.7003, | 25219,   | 448570, | 2349.3470, | 25257,   | 450064, | 2346.9938, |
| 5.876988 |         |            | 5.871107 |         |            | 5.865226 |         |            |
| 25182,   | 444854, | 2351.6383, | 25220,   | 448342, | 2349.2851, | 25258,   | 450354, | 2346.9319, |
| 5.876833 |         |            | 5.870952 |         |            | 5.865072 |         |            |
| 25183,   | 445032, | 2351.5764, | 25221,   | 448352, | 2349.2232, | 25259,   | 450026, | 2346.8700, |
| 5.876678 |         |            | 5.870798 |         |            | 5.864917 |         |            |
| 25184,   | 445646, | 2351.5145, | 25222,   | 448970, | 2349.1613, | 25260,   | 449510, | 2346.8080, |
| 5.876524 |         |            | 5.870643 |         |            | 5.864762 |         |            |
| 25185,   | 446424, | 2351.4526, | 25223,   | 449914, | 2349.0993, | 25261,   | 449152, | 2346.7461, |
| 5.876369 |         |            | 5.870488 |         |            | 5.864607 |         |            |
| 25186,   | 446994, | 2351.3906, | 25224,   | 450526, | 2349.0374, | 25262,   | 449060, | 2346.6842, |
| 5.876214 |         |            | 5.870333 |         |            | 5.864453 |         |            |
| 25187,   | 447330, | 2351.3287, | 25225,   | 450482, | 2348.9755, | 25263,   | 449234, | 2346.6223, |
| 5.876059 |         |            | 5.870179 |         |            | 5.864298 |         |            |
| 25188,   | 447768, | 2351.2668, | 25226,   | 450112, | 2348.9135, | 25264,   | 449704, | 2346.5603, |
| 5.875905 |         |            | 5.870024 |         |            | 5.864143 |         |            |
| 25189,   | 448536, | 2351.2048, | 25227,   | 449998, | 2348.8516, | 25265,   | 450420, | 2346.4984, |
| 5.875750 |         |            | 5.869869 |         |            | 5.863988 |         |            |
| 25190,   | 449364, | 2351.1429, | 25228,   | 450338, | 2348.7897, | 25266,   | 451108, | 2346.4365, |
| 5.875595 |         |            | 5.869714 |         |            | 5.863834 |         |            |
| 25191,   | 449654, | 2351.0810, | 25229,   | 450784, | 2348.7278, | 25267,   | 451444, | 2346.3745, |
| 5.875440 |         |            | 5.869560 |         |            | 5.863679 |         |            |
| 25192,   | 449138, | 2351.0191, | 25230,   | 450880, | 2348.6658, | 25268,   | 451404, | 2346.3126, |
| 5.875286 |         |            | 5.869405 |         |            | 5.863524 |         |            |
| 25193,   | 448252, | 2350.9571, | 25231,   | 450556, | 2348.6039, | 25269,   | 451410, | 2346.2507, |
| 5.875131 |         |            | 5.869250 |         |            | 5.863369 |         |            |
| 25194,   | 447738, | 2350.8952, | 25232,   | 450090, | 2348.5420, | 25270,   | 451956, | 2346.1888, |
| 5.874976 |         |            | 5.869095 |         |            | 5.863215 |         |            |
| 25195,   | 447862, | 2350.8333, | 25233,   | 449638, | 2348.4801, | 25271,   | 453088, | 2346.1268, |
| 5.874821 |         |            | 5.868941 |         |            | 5.863060 |         |            |
| 25196,   | 448102, | 2350.7714, | 25234,   | 449076, | 2348.4181, | 25272,   | 454264, | 2346.0649, |
| 5.874667 |         |            | 5.868786 |         |            | 5.862905 |         |            |
| 25197,   | 447698, | 2350.7094, | 25235,   | 448272, | 2348.3562, | 25273,   | 454822, | 2346.0030, |
| 5.874512 |         |            | 5.868631 |         |            | 5.862750 |         |            |
| 25198,   | 446486, | 2350.6475, | 25236,   | 447504, | 2348.2943, | 25274,   | 454570, | 2345.9411, |
| 5.874357 |         |            | 5.868476 |         |            | 5.862596 |         |            |
| 25199,   | 445138, | 2350.5856, | 25237,   | 447358, | 2348.2324, | 25275,   | 453908, | 2345.8791, |
| 5.874202 |         |            | 5.868322 |         |            | 5.862441 |         |            |
| 25200,   | 444482, | 2350.5236, | 25238,   | 448100, | 2348.1704, | 25276,   | 453384, | 2345.8172, |
| 5.874048 |         |            | 5.868167 |         |            | 5.862286 |         |            |
| 25201,   | 444710, | 2350.4617, | 25239,   | 449268, | 2348.1085, | 25277,   | 453218, | 2345.7553, |
| 5.873893 |         |            | 5.868012 |         |            | 5.862131 |         |            |
| 25202,   | 445296, | 2350.3998, | 25240,   | 450000, | 2348.0466, | 25278,   | 453248, | 2345.6933, |
| 5.873738 |         |            | 5.867857 |         |            | 5.861977 |         |            |

|          |         |            |          |         |            |          |         |            |
|----------|---------|------------|----------|---------|------------|----------|---------|------------|
| 25279,   | 453286, | 2345.6314, | 25317,   | 456762, | 2343.2782, | 25355,   | 457020, | 2340.9250, |
| 5.861822 |         |            | 5.855941 |         |            | 5.850060 |         |            |
| 25280,   | 453362, | 2345.5695, | 25318,   | 456558, | 2343.2163, | 25356,   | 456782, | 2340.8631, |
| 5.861667 |         |            | 5.855786 |         |            | 5.849905 |         |            |
| 25281,   | 453608, | 2345.5076, | 25319,   | 456894, | 2343.1543, | 25357,   | 457206, | 2340.8011, |
| 5.861512 |         |            | 5.855631 |         |            | 5.849751 |         |            |
| 25282,   | 453990, | 2345.4456, | 25320,   | 457622, | 2343.0924, | 25358,   | 458084, | 2340.7392, |
| 5.861357 |         |            | 5.855477 |         |            | 5.849596 |         |            |
| 25283,   | 454316, | 2345.3837, | 25321,   | 458242, | 2343.0305, | 25359,   | 458780, | 2340.6773, |
| 5.861203 |         |            | 5.855322 |         |            | 5.849441 |         |            |
| 25284,   | 454450, | 2345.3218, | 25322,   | 458494, | 2342.9686, | 25360,   | 458868, | 2340.6153, |
| 5.861048 |         |            | 5.855167 |         |            | 5.849286 |         |            |
| 25285,   | 454516, | 2345.2599, | 25323,   | 458602, | 2342.9066, | 25361,   | 458518, | 2340.5534, |
| 5.860893 |         |            | 5.855012 |         |            | 5.849132 |         |            |
| 25286,   | 454696, | 2345.1979, | 25324,   | 458924, | 2342.8447, | 25362,   | 458178, | 2340.4915, |
| 5.860738 |         |            | 5.854858 |         |            | 5.848977 |         |            |
| 25287,   | 454908, | 2345.1360, | 25325,   | 459394, | 2342.7828, | 25363,   | 458020, | 2340.4296, |
| 5.860584 |         |            | 5.854703 |         |            | 5.848822 |         |            |
| 25288,   | 454824, | 2345.0741, | 25326,   | 459538, | 2342.7209, | 25364,   | 457826, | 2340.3676, |
| 5.860429 |         |            | 5.854548 |         |            | 5.848667 |         |            |
| 25289,   | 454244, | 2345.0122, | 25327,   | 459046, | 2342.6589, | 25365,   | 457454, | 2340.3057, |
| 5.860274 |         |            | 5.854393 |         |            | 5.848513 |         |            |
| 25290,   | 453484, | 2344.9502, | 25328,   | 458318, | 2342.5970, | 25366,   | 457256, | 2340.2438, |
| 5.860119 |         |            | 5.854239 |         |            | 5.848358 |         |            |
| 25291,   | 453156, | 2344.8883, | 25329,   | 458160, | 2342.5351, | 25367,   | 457848, | 2340.1819, |
| 5.859965 |         |            | 5.854084 |         |            | 5.848203 |         |            |
| 25292,   | 453566, | 2344.8264, | 25330,   | 458948, | 2342.4732, | 25368,   | 459378, | 2340.1199, |
| 5.859810 |         |            | 5.853929 |         |            | 5.848048 |         |            |
| 25293,   | 454356, | 2344.7644, | 25331,   | 460116, | 2342.4112, | 25369,   | 461192, | 2340.0580, |
| 5.859655 |         |            | 5.853774 |         |            | 5.847894 |         |            |
| 25294,   | 454822, | 2344.7025, | 25332,   | 460630, | 2342.3493, | 25370,   | 462328, | 2339.9961, |
| 5.859500 |         |            | 5.853620 |         |            | 5.847739 |         |            |
| 25295,   | 454634, | 2344.6406, | 25333,   | 459974, | 2342.2874, | 25371,   | 462376, | 2339.9341, |
| 5.859346 |         |            | 5.853465 |         |            | 5.847584 |         |            |
| 25296,   | 454158, | 2344.5787, | 25334,   | 458642, | 2342.2254, | 25372,   | 461812, | 2339.8722, |
| 5.859191 |         |            | 5.853310 |         |            | 5.847429 |         |            |
| 25297,   | 454030, | 2344.5167, | 25335,   | 457628, | 2342.1635, | 25373,   | 461386, | 2339.8103, |
| 5.859036 |         |            | 5.853155 |         |            | 5.847275 |         |            |
| 25298,   | 454422, | 2344.4548, | 25336,   | 457452, | 2342.1016, | 25374,   | 461348, | 2339.7484, |
| 5.858881 |         |            | 5.853001 |         |            | 5.847120 |         |            |
| 25299,   | 454886, | 2344.3929, | 25337,   | 457820, | 2342.0397, | 25375,   | 461330, | 2339.6864, |
| 5.858727 |         |            | 5.852846 |         |            | 5.846965 |         |            |
| 25300,   | 454842, | 2344.3310, | 25338,   | 458116, | 2341.9777, | 25376,   | 461002, | 2339.6245, |
| 5.858572 |         |            | 5.852691 |         |            | 5.846810 |         |            |
| 25301,   | 454274, | 2344.2690, | 25339,   | 458138, | 2341.9158, | 25377,   | 460642, | 2339.5626, |
| 5.858417 |         |            | 5.852536 |         |            | 5.846656 |         |            |
| 25302,   | 453718, | 2344.2071, | 25340,   | 458206, | 2341.8539, | 25378,   | 460904, | 2339.5007, |
| 5.858262 |         |            | 5.852382 |         |            | 5.846501 |         |            |
| 25303,   | 453688, | 2344.1452, | 25341,   | 458588, | 2341.7920, | 25379,   | 462038, | 2339.4387, |
| 5.858108 |         |            | 5.852227 |         |            | 5.846346 |         |            |
| 25304,   | 454142, | 2344.0832, | 25342,   | 459050, | 2341.7300, | 25380,   | 463468, | 2339.3768, |
| 5.857953 |         |            | 5.852072 |         |            | 5.846191 |         |            |
| 25305,   | 454588, | 2344.0213, | 25343,   | 459086, | 2341.6681, | 25381,   | 464274, | 2339.3149, |
| 5.857798 |         |            | 5.851917 |         |            | 5.846036 |         |            |
| 25306,   | 454688, | 2343.9594, | 25344,   | 458536, | 2341.6062, | 25382,   | 464104, | 2339.2530, |
| 5.857643 |         |            | 5.851763 |         |            | 5.845882 |         |            |
| 25307,   | 454596, | 2343.8975, | 25345,   | 457858, | 2341.5442, | 25383,   | 463476, | 2339.1910, |
| 5.857489 |         |            | 5.851608 |         |            | 5.845727 |         |            |
| 25308,   | 454714, | 2343.8355, | 25346,   | 457658, | 2341.4823, | 25384,   | 463160, | 2339.1291, |
| 5.857334 |         |            | 5.851453 |         |            | 5.845572 |         |            |
| 25309,   | 455166, | 2343.7736, | 25347,   | 458040, | 2341.4204, | 25385,   | 463368, | 2339.0672, |
| 5.857179 |         |            | 5.851298 |         |            | 5.845417 |         |            |
| 25310,   | 455688, | 2343.7117, | 25348,   | 458532, | 2341.3585, | 25386,   | 463632, | 2339.0052, |
| 5.857024 |         |            | 5.851143 |         |            | 5.845263 |         |            |
| 25311,   | 455986, | 2343.6498, | 25349,   | 458620, | 2341.2965, | 25387,   | 463440, | 2338.9433, |
| 5.856870 |         |            | 5.850989 |         |            | 5.845108 |         |            |
| 25312,   | 456108, | 2343.5878, | 25350,   | 458298, | 2341.2346, | 25388,   | 462860, | 2338.8814, |
| 5.856715 |         |            | 5.850834 |         |            | 5.844953 |         |            |
| 25313,   | 456348, | 2343.5259, | 25351,   | 457972, | 2341.1727, | 25389,   | 462420, | 2338.8195, |
| 5.856560 |         |            | 5.850679 |         |            | 5.844798 |         |            |
| 25314,   | 456796, | 2343.4640, | 25352,   | 457884, | 2341.1108, | 25390,   | 462452, | 2338.7575, |
| 5.856405 |         |            | 5.850524 |         |            | 5.844644 |         |            |
| 25315,   | 457166, | 2343.4021, | 25353,   | 457848, | 2341.0488, | 25391,   | 462714, | 2338.6956, |
| 5.856250 |         |            | 5.850370 |         |            | 5.844489 |         |            |
| 25316,   | 457128, | 2343.3401, | 25354,   | 457538, | 2340.9869, | 25392,   | 462764, | 2338.6337, |
| 5.856096 |         |            | 5.850215 |         |            | 5.844334 |         |            |

|          |         |            |          |         |            |          |         |            |
|----------|---------|------------|----------|---------|------------|----------|---------|------------|
| 25393,   | 462574, | 2338.5718, | 25431,   | 466170, | 2336.2185, | 25469,   | 469076, | 2333.8653, |
| 5.844179 |         |            | 5.838299 |         |            | 5.832418 |         |            |
| 25394,   | 462622, | 2338.5098, | 25432,   | 465614, | 2336.1566, | 25470,   | 469186, | 2333.8034, |
| 5.844025 |         |            | 5.838144 |         |            | 5.832263 |         |            |
| 25395,   | 463318, | 2338.4479, | 25433,   | 465312, | 2336.0947, | 25471,   | 469772, | 2333.7415, |
| 5.843870 |         |            | 5.837989 |         |            | 5.832108 |         |            |
| 25396,   | 464428, | 2338.3860, | 25434,   | 465464, | 2336.0328, | 25472,   | 470564, | 2333.6795, |
| 5.843715 |         |            | 5.837834 |         |            | 5.831954 |         |            |
| 25397,   | 465230, | 2338.3240, | 25435,   | 465742, | 2335.9708, | 25473,   | 470886, | 2333.6176, |
| 5.843560 |         |            | 5.837680 |         |            | 5.831799 |         |            |
| 25398,   | 465236, | 2338.2621, | 25436,   | 465794, | 2335.9089, | 25474,   | 470436, | 2333.5557, |
| 5.843406 |         |            | 5.837525 |         |            | 5.831644 |         |            |
| 25399,   | 464672, | 2338.2002, | 25437,   | 465652, | 2335.8470, | 25475,   | 469628, | 2333.4937, |
| 5.843251 |         |            | 5.837370 |         |            | 5.831489 |         |            |
| 25400,   | 464218, | 2338.1383, | 25438,   | 465606, | 2335.7850, | 25476,   | 469068, | 2333.4318, |
| 5.843096 |         |            | 5.837215 |         |            | 5.831334 |         |            |
| 25401,   | 464282, | 2338.0763, | 25439,   | 465790, | 2335.7231, | 25477,   | 468834, | 2333.3699, |
| 5.842941 |         |            | 5.837061 |         |            | 5.831180 |         |            |
| 25402,   | 464678, | 2338.0144, | 25440,   | 466056, | 2335.6612, | 25478,   | 468430, | 2333.3080, |
| 5.842787 |         |            | 5.836906 |         |            | 5.831025 |         |            |
| 25403,   | 464990, | 2337.9525, | 25441,   | 466248, | 2335.5993, | 25479,   | 467456, | 2333.2460, |
| 5.842632 |         |            | 5.836751 |         |            | 5.830870 |         |            |
| 25404,   | 465090, | 2337.8906, | 25442,   | 466472, | 2335.5373, | 25480,   | 466248, | 2333.1841, |
| 5.842477 |         |            | 5.836596 |         |            | 5.830715 |         |            |
| 25405,   | 465182, | 2337.8286, | 25443,   | 466972, | 2335.4754, | 25481,   | 465646, | 2333.1222, |
| 5.842322 |         |            | 5.836441 |         |            | 5.830561 |         |            |
| 25406,   | 465378, | 2337.7667, | 25444,   | 467734, | 2335.4135, | 25482,   | 466162, | 2333.0603, |
| 5.842168 |         |            | 5.836287 |         |            | 5.830406 |         |            |
| 25407,   | 465394, | 2337.7048, | 25445,   | 468390, | 2335.3516, | 25483,   | 467456, | 2332.9983, |
| 5.842013 |         |            | 5.836132 |         |            | 5.830251 |         |            |
| 25408,   | 464848, | 2337.6429, | 25446,   | 468604, | 2335.2896, | 25484,   | 468706, | 2332.9364, |
| 5.841858 |         |            | 5.835977 |         |            | 5.830096 |         |            |
| 25409,   | 463810, | 2337.5809, | 25447,   | 468498, | 2335.2277, | 25485,   | 469414, | 2332.8745, |
| 5.841703 |         |            | 5.835822 |         |            | 5.829942 |         |            |
| 25410,   | 462880, | 2337.5190, | 25448,   | 468562, | 2335.1658, | 25486,   | 469778, | 2332.8126, |
| 5.841548 |         |            | 5.835668 |         |            | 5.829787 |         |            |
| 25411,   | 462636, | 2337.4571, | 25449,   | 469056, | 2335.1038, | 25487,   | 470284, | 2332.7506, |
| 5.841394 |         |            | 5.835513 |         |            | 5.829632 |         |            |
| 25412,   | 463034, | 2337.3951, | 25450,   | 469634, | 2335.0419, | 25488,   | 471024, | 2332.6887, |
| 5.841239 |         |            | 5.835358 |         |            | 5.829477 |         |            |
| 25413,   | 463458, | 2337.3332, | 25451,   | 469646, | 2334.9800, | 25489,   | 471618, | 2332.6268, |
| 5.841084 |         |            | 5.835203 |         |            | 5.829323 |         |            |
| 25414,   | 463432, | 2337.2713, | 25452,   | 468878, | 2334.9181, | 25490,   | 471700, | 2332.5648, |
| 5.840929 |         |            | 5.835049 |         |            | 5.829168 |         |            |
| 25415,   | 463124, | 2337.2094, | 25453,   | 467860, | 2334.8561, | 25491,   | 471388, | 2332.5029, |
| 5.840775 |         |            | 5.834894 |         |            | 5.829013 |         |            |
| 25416,   | 463118, | 2337.1474, | 25454,   | 467338, | 2334.7942, | 25492,   | 471136, | 2332.4410, |
| 5.840620 |         |            | 5.834739 |         |            | 5.828858 |         |            |
| 25417,   | 463684, | 2337.0855, | 25455,   | 467492, | 2334.7323, | 25493,   | 471202, | 2332.3791, |
| 5.840465 |         |            | 5.834584 |         |            | 5.828704 |         |            |
| 25418,   | 464412, | 2337.0236, | 25456,   | 467756, | 2334.6704, | 25494,   | 471378, | 2332.3171, |
| 5.840310 |         |            | 5.834430 |         |            | 5.828549 |         |            |
| 25419,   | 464670, | 2336.9617, | 25457,   | 467446, | 2334.6084, | 25495,   | 471288, | 2332.2552, |
| 5.840156 |         |            | 5.834275 |         |            | 5.828394 |         |            |
| 25420,   | 464292, | 2336.8997, | 25458,   | 466502, | 2334.5465, | 25496,   | 470896, | 2332.1933, |
| 5.840001 |         |            | 5.834120 |         |            | 5.828239 |         |            |
| 25421,   | 463764, | 2336.8378, | 25459,   | 465500, | 2334.4846, | 25497,   | 470546, | 2332.1314, |
| 5.839846 |         |            | 5.833965 |         |            | 5.828085 |         |            |
| 25422,   | 463612, | 2336.7759, | 25460,   | 464976, | 2334.4227, | 25498,   | 470548, | 2332.0694, |
| 5.839691 |         |            | 5.833811 |         |            | 5.827930 |         |            |
| 25423,   | 463808, | 2336.7139, | 25461,   | 464862, | 2334.3607, | 25499,   | 470834, | 2332.0075, |
| 5.839537 |         |            | 5.833656 |         |            | 5.827775 |         |            |
| 25424,   | 463858, | 2336.6520, | 25462,   | 464722, | 2334.2988, | 25500,   | 471100, | 2331.9456, |
| 5.839382 |         |            | 5.833501 |         |            | 5.827620 |         |            |
| 25425,   | 463474, | 2336.5901, | 25463,   | 464416, | 2334.2369, | 25501,   | 471258, | 2331.8836, |
| 5.839227 |         |            | 5.833346 |         |            | 5.827466 |         |            |
| 25426,   | 463034, | 2336.5282, | 25464,   | 464396, | 2334.1749, | 25502,   | 471552, | 2331.8217, |
| 5.839072 |         |            | 5.833192 |         |            | 5.827311 |         |            |
| 25427,   | 463224, | 2336.4662, | 25465,   | 465198, | 2334.1130, | 25503,   | 472176, | 2331.7598, |
| 5.838918 |         |            | 5.833037 |         |            | 5.827156 |         |            |
| 25428,   | 464264, | 2336.4043, | 25466,   | 466720, | 2334.0511, | 25504,   | 472876, | 2331.6979, |
| 5.838763 |         |            | 5.832882 |         |            | 5.827001 |         |            |
| 25429,   | 465570, | 2336.3424, | 25467,   | 468212, | 2333.9892, | 25505,   | 473084, | 2331.6359, |
| 5.838608 |         |            | 5.832727 |         |            | 5.826847 |         |            |
| 25430,   | 466306, | 2336.2805, | 25468,   | 468976, | 2333.9272, | 25506,   | 472524, | 2331.5740, |
| 5.838453 |         |            | 5.832573 |         |            | 5.826692 |         |            |

|          |         |            |          |         |            |          |         |            |
|----------|---------|------------|----------|---------|------------|----------|---------|------------|
| 25507,   | 471606, | 2331.5121, | 25545,   | 475840, | 2329.1589, | 25583,   | 476870, | 2326.8056, |
| 5.826537 |         |            | 5.820656 |         |            | 5.814775 |         |            |
| 25508,   | 471072, | 2331.4502, | 25546,   | 476574, | 2329.0969, | 25584,   | 476566, | 2326.7437, |
| 5.826382 |         |            | 5.820501 |         |            | 5.814621 |         |            |
| 25509,   | 471294, | 2331.3882, | 25547,   | 477592, | 2329.0350, | 25585,   | 476530, | 2326.6818, |
| 5.826227 |         |            | 5.820347 |         |            | 5.814466 |         |            |
| 25510,   | 471948, | 2331.3263, | 25548,   | 478278, | 2328.9731, | 25586,   | 476792, | 2326.6199, |
| 5.826073 |         |            | 5.820192 |         |            | 5.814311 |         |            |
| 25511,   | 472446, | 2331.2644, | 25549,   | 477998, | 2328.9112, | 25587,   | 477142, | 2326.5579, |
| 5.825918 |         |            | 5.820037 |         |            | 5.814156 |         |            |
| 25512,   | 472604, | 2331.2025, | 25550,   | 476810, | 2328.8492, | 25588,   | 477508, | 2326.4960, |
| 5.825763 |         |            | 5.819882 |         |            | 5.814002 |         |            |
| 25513,   | 472788, | 2331.1405, | 25551,   | 475488, | 2328.7873, | 25589,   | 478034, | 2326.4341, |
| 5.825608 |         |            | 5.819728 |         |            | 5.813847 |         |            |
| 25514,   | 473338, | 2331.0786, | 25552,   | 474752, | 2328.7254, | 25590,   | 478750, | 2326.3722, |
| 5.825454 |         |            | 5.819573 |         |            | 5.813692 |         |            |
| 25515,   | 474052, | 2331.0167, | 25553,   | 474644, | 2328.6635, | 25591,   | 479362, | 2326.3102, |
| 5.825299 |         |            | 5.819418 |         |            | 5.813537 |         |            |
| 25516,   | 474330, | 2330.9547, | 25554,   | 474624, | 2328.6015, | 25592,   | 479500, | 2326.2483, |
| 5.825144 |         |            | 5.819263 |         |            | 5.813383 |         |            |
| 25517,   | 473868, | 2330.8928, | 25555,   | 474260, | 2328.5396, | 25593,   | 479172, | 2326.1864, |
| 5.824989 |         |            | 5.819109 |         |            | 5.813228 |         |            |
| 25518,   | 473070, | 2330.8309, | 25556,   | 473692, | 2328.4777, | 25594,   | 478878, | 2326.1244, |
| 5.824835 |         |            | 5.818954 |         |            | 5.813073 |         |            |
| 25519,   | 472706, | 2330.7690, | 25557,   | 473344, | 2328.4157, | 25595,   | 479038, | 2326.0625, |
| 5.824680 |         |            | 5.818799 |         |            | 5.812918 |         |            |
| 25520,   | 473118, | 2330.7070, | 25558,   | 473344, | 2328.3538, | 25596,   | 479506, | 2326.0006, |
| 5.824525 |         |            | 5.818644 |         |            | 5.812764 |         |            |
| 25521,   | 473926, | 2330.6451, | 25559,   | 473404, | 2328.2919, | 25597,   | 479644, | 2325.9387, |
| 5.824370 |         |            | 5.818490 |         |            | 5.812609 |         |            |
| 25522,   | 474484, | 2330.5832, | 25560,   | 473272, | 2328.2300, | 25598,   | 479040, | 2325.8767, |
| 5.824216 |         |            | 5.818335 |         |            | 5.812454 |         |            |
| 25523,   | 474556, | 2330.5213, | 25561,   | 473186, | 2328.1680, | 25599,   | 478000, | 2325.8148, |
| 5.824061 |         |            | 5.818180 |         |            | 5.812299 |         |            |
| 25524,   | 474460, | 2330.4593, | 25562,   | 473644, | 2328.1061, | 25600,   | 477320, | 2325.7529, |
| 5.823906 |         |            | 5.818025 |         |            | 5.812145 |         |            |
| 25525,   | 474582, | 2330.3974, | 25563,   | 474720, | 2328.0442, | 25601,   | 477490, | 2325.6910, |
| 5.823751 |         |            | 5.817871 |         |            | 5.811990 |         |            |
| 25526,   | 474898, | 2330.3355, | 25564,   | 475782, | 2327.9823, | 25602,   | 478244, | 2325.6290, |
| 5.823597 |         |            | 5.817716 |         |            | 5.811835 |         |            |
| 25527,   | 475076, | 2330.2735, | 25565,   | 476034, | 2327.9203, | 25603,   | 478928, | 2325.5671, |
| 5.823442 |         |            | 5.817561 |         |            | 5.811680 |         |            |
| 25528,   | 474982, | 2330.2116, | 25566,   | 475326, | 2327.8584, | 25604,   | 479196, | 2325.5052, |
| 5.823287 |         |            | 5.817406 |         |            | 5.811526 |         |            |
| 25529,   | 474878, | 2330.1497, | 25567,   | 474406, | 2327.7965, | 25605,   | 479276, | 2325.4433, |
| 5.823132 |         |            | 5.817252 |         |            | 5.811371 |         |            |
| 25530,   | 475070, | 2330.0878, | 25568,   | 474152, | 2327.7345, | 25606,   | 479532, | 2325.3813, |
| 5.822978 |         |            | 5.817097 |         |            | 5.811216 |         |            |
| 25531,   | 475454, | 2330.0258, | 25569,   | 474728, | 2327.6726, | 25607,   | 479888, | 2325.3194, |
| 5.822823 |         |            | 5.816942 |         |            | 5.811061 |         |            |
| 25532,   | 475518, | 2329.9639, | 25570,   | 475494, | 2327.6107, | 25608,   | 479900, | 2325.2575, |
| 5.822668 |         |            | 5.816787 |         |            | 5.810906 |         |            |
| 25533,   | 474954, | 2329.9020, | 25571,   | 475792, | 2327.5488, | 25609,   | 479328, | 2325.1955, |
| 5.822513 |         |            | 5.816633 |         |            | 5.810752 |         |            |
| 25534,   | 474068, | 2329.8401, | 25572,   | 475654, | 2327.4868, | 25610,   | 478560, | 2325.1336, |
| 5.822359 |         |            | 5.816478 |         |            | 5.810597 |         |            |
| 25535,   | 473522, | 2329.7781, | 25573,   | 475680, | 2327.4249, | 25611,   | 478268, | 2325.0717, |
| 5.822204 |         |            | 5.816323 |         |            | 5.810442 |         |            |
| 25536,   | 473636, | 2329.7162, | 25574,   | 476236, | 2327.3630, | 25612,   | 478738, | 2325.0098, |
| 5.822049 |         |            | 5.816168 |         |            | 5.810287 |         |            |
| 25537,   | 474046, | 2329.6543, | 25575,   | 476958, | 2327.3011, | 25613,   | 479566, | 2324.9478, |
| 5.821894 |         |            | 5.816013 |         |            | 5.810133 |         |            |
| 25538,   | 474134, | 2329.5924, | 25576,   | 477116, | 2327.2391, | 25614,   | 480154, | 2324.8859, |
| 5.821740 |         |            | 5.815859 |         |            | 5.809978 |         |            |
| 25539,   | 473746, | 2329.5304, | 25577,   | 476494, | 2327.1772, | 25615,   | 480348, | 2324.8240, |
| 5.821585 |         |            | 5.815704 |         |            | 5.809823 |         |            |
| 25540,   | 473350, | 2329.4685, | 25578,   | 475648, | 2327.1153, | 25616,   | 480544, | 2324.7621, |
| 5.821430 |         |            | 5.815549 |         |            | 5.809668 |         |            |
| 25541,   | 473484, | 2329.4066, | 25579,   | 475382, | 2327.0534, | 25617,   | 481098, | 2324.7001, |
| 5.821275 |         |            | 5.815394 |         |            | 5.809514 |         |            |
| 25542,   | 474164, | 2329.3446, | 25580,   | 475894, | 2326.9914, | 25618,   | 481808, | 2324.6382, |
| 5.821120 |         |            | 5.815240 |         |            | 5.809359 |         |            |
| 25543,   | 474928, | 2329.2827, | 25581,   | 476666, | 2326.9295, | 25619,   | 482076, | 2324.5763, |
| 5.820966 |         |            | 5.815085 |         |            | 5.809204 |         |            |
| 25544,   | 475428, | 2329.2208, | 25582,   | 477040, | 2326.8676, | 25620,   | 481600, | 2324.5143, |
| 5.820811 |         |            | 5.814930 |         |            | 5.809049 |         |            |

|          |         |            |          |         |            |          |         |            |
|----------|---------|------------|----------|---------|------------|----------|---------|------------|
| 25621,   | 480762, | 2324.4524, | 25659,   | 483478, | 2322.0992, | 25697,   | 487360, | 2319.7460, |
| 5.808895 |         |            | 5.803014 |         |            | 5.797133 |         |            |
| 25622,   | 480262, | 2324.3905, | 25660,   | 483372, | 2322.0373, | 25698,   | 488310, | 2319.6840, |
| 5.808740 |         |            | 5.802859 |         |            | 5.796978 |         |            |
| 25623,   | 480374, | 2324.3286, | 25661,   | 483870, | 2321.9753, | 25699,   | 489464, | 2319.6221, |
| 5.808585 |         |            | 5.802704 |         |            | 5.796824 |         |            |
| 25624,   | 480702, | 2324.2666, | 25662,   | 484340, | 2321.9134, | 25700,   | 490118, | 2319.5602, |
| 5.808430 |         |            | 5.802550 |         |            | 5.796669 |         |            |
| 25625,   | 480666, | 2324.2047, | 25663,   | 484400, | 2321.8515, | 25701,   | 489848, | 2319.4983, |
| 5.808276 |         |            | 5.802395 |         |            | 5.796514 |         |            |
| 25626,   | 480180, | 2324.1428, | 25664,   | 484296, | 2321.7896, | 25702,   | 488942, | 2319.4363, |
| 5.808121 |         |            | 5.802240 |         |            | 5.796359 |         |            |
| 25627,   | 479750, | 2324.0809, | 25665,   | 484574, | 2321.7276, | 25703,   | 488102, | 2319.3744, |
| 5.807966 |         |            | 5.802085 |         |            | 5.796204 |         |            |
| 25628,   | 479924, | 2324.0189, | 25666,   | 485366, | 2321.6657, | 25704,   | 487718, | 2319.3125, |
| 5.807811 |         |            | 5.801931 |         |            | 5.796050 |         |            |
| 25629,   | 480714, | 2323.9570, | 25667,   | 486168, | 2321.6038, | 25705,   | 487582, | 2319.2506, |
| 5.807657 |         |            | 5.801776 |         |            | 5.795895 |         |            |
| 25630,   | 481644, | 2323.8951, | 25668,   | 486354, | 2321.5419, | 25706,   | 487252, | 2319.1886, |
| 5.807502 |         |            | 5.801621 |         |            | 5.795740 |         |            |
| 25631,   | 482224, | 2323.8332, | 25669,   | 485884, | 2321.4799, | 25707,   | 486674, | 2319.1267, |
| 5.807347 |         |            | 5.801466 |         |            | 5.795585 |         |            |
| 25632,   | 482328, | 2323.7712, | 25670,   | 485356, | 2321.4180, | 25708,   | 486212, | 2319.0648, |
| 5.807192 |         |            | 5.801312 |         |            | 5.795431 |         |            |
| 25633,   | 482078, | 2323.7093, | 25671,   | 485350, | 2321.3561, | 25709,   | 486150, | 2319.0029, |
| 5.807038 |         |            | 5.801157 |         |            | 5.795276 |         |            |
| 25634,   | 481546, | 2323.6474, | 25672,   | 485866, | 2321.2941, | 25710,   | 486276, | 2318.9409, |
| 5.806883 |         |            | 5.801002 |         |            | 5.795121 |         |            |
| 25635,   | 480740, | 2323.5854, | 25673,   | 486384, | 2321.2322, | 25711,   | 486126, | 2318.8790, |
| 5.806728 |         |            | 5.800847 |         |            | 5.794966 |         |            |
| 25636,   | 479856, | 2323.5235, | 25674,   | 486536, | 2321.1703, | 25712,   | 485592, | 2318.8171, |
| 5.806573 |         |            | 5.800692 |         |            | 5.794812 |         |            |
| 25637,   | 479362, | 2323.4616, | 25675,   | 486450, | 2321.1084, | 25713,   | 485162, | 2318.7551, |
| 5.806419 |         |            | 5.800538 |         |            | 5.794657 |         |            |
| 25638,   | 479654, | 2323.3997, | 25676,   | 486482, | 2321.0464, | 25714,   | 485442, | 2318.6932, |
| 5.806264 |         |            | 5.800383 |         |            | 5.794502 |         |            |
| 25639,   | 480610, | 2323.3377, | 25677,   | 486648, | 2320.9845, | 25715,   | 486512, | 2318.6313, |
| 5.806109 |         |            | 5.800228 |         |            | 5.794347 |         |            |
| 25640,   | 481576, | 2323.2758, | 25678,   | 486546, | 2320.9226, | 25716,   | 487792, | 2318.5694, |
| 5.805954 |         |            | 5.800073 |         |            | 5.794193 |         |            |
| 25641,   | 481980, | 2323.2139, | 25679,   | 485880, | 2320.8607, | 25717,   | 488638, | 2318.5074, |
| 5.805799 |         |            | 5.799919 |         |            | 5.794038 |         |            |
| 25642,   | 481848, | 2323.1520, | 25680,   | 484960, | 2320.7987, | 25718,   | 488910, | 2318.4455, |
| 5.805645 |         |            | 5.799764 |         |            | 5.793883 |         |            |
| 25643,   | 481754, | 2323.0900, | 25681,   | 484476, | 2320.7368, | 25719,   | 488922, | 2318.3836, |
| 5.805490 |         |            | 5.799609 |         |            | 5.793728 |         |            |
| 25644,   | 482130, | 2323.0281, | 25682,   | 484792, | 2320.6749, | 25720,   | 488946, | 2318.3217, |
| 5.805335 |         |            | 5.799454 |         |            | 5.793574 |         |            |
| 25645,   | 482812, | 2322.9662, | 25683,   | 485518, | 2320.6130, | 25721,   | 488850, | 2318.2597, |
| 5.805180 |         |            | 5.799300 |         |            | 5.793419 |         |            |
| 25646,   | 483224, | 2322.9042, | 25684,   | 485952, | 2320.5510, | 25722,   | 488408, | 2318.1978, |
| 5.805026 |         |            | 5.799145 |         |            | 5.793264 |         |            |
| 25647,   | 483102, | 2322.8423, | 25685,   | 485830, | 2320.4891, | 25723,   | 487738, | 2318.1359, |
| 5.804871 |         |            | 5.798990 |         |            | 5.793109 |         |            |
| 25648,   | 482828, | 2322.7804, | 25686,   | 485610, | 2320.4272, | 25724,   | 487346, | 2318.0739, |
| 5.804716 |         |            | 5.798835 |         |            | 5.792955 |         |            |
| 25649,   | 483044, | 2322.7185, | 25687,   | 485894, | 2320.3652, | 25725,   | 487592, | 2318.0120, |
| 5.804561 |         |            | 5.798681 |         |            | 5.792800 |         |            |
| 25650,   | 483996, | 2322.6565, | 25688,   | 486698, | 2320.3033, | 25726,   | 488248, | 2317.9501, |
| 5.804407 |         |            | 5.798526 |         |            | 5.792645 |         |            |
| 25651,   | 485282, | 2322.5946, | 25689,   | 487386, | 2320.2414, | 25727,   | 488748, | 2317.8882, |
| 5.804252 |         |            | 5.798371 |         |            | 5.792490 |         |            |
| 25652,   | 486318, | 2322.5327, | 25690,   | 487362, | 2320.1795, | 25728,   | 488832, | 2317.8262, |
| 5.804097 |         |            | 5.798216 |         |            | 5.792336 |         |            |
| 25653,   | 486852, | 2322.4708, | 25691,   | 486706, | 2320.1175, | 25729,   | 488890, | 2317.7643, |
| 5.803942 |         |            | 5.798062 |         |            | 5.792181 |         |            |
| 25654,   | 487032, | 2322.4088, | 25692,   | 486070, | 2320.0556, | 25730,   | 489492, | 2317.7024, |
| 5.803788 |         |            | 5.797907 |         |            | 5.792026 |         |            |
| 25655,   | 486982, | 2322.3469, | 25693,   | 485964, | 2319.9937, | 25731,   | 490674, | 2317.6405, |
| 5.803633 |         |            | 5.797752 |         |            | 5.791871 |         |            |
| 25656,   | 486560, | 2322.2850, | 25694,   | 486296, | 2319.9318, | 25732,   | 491800, | 2317.5785, |
| 5.803478 |         |            | 5.797597 |         |            | 5.791717 |         |            |
| 25657,   | 485610, | 2322.2231, | 25695,   | 486650, | 2319.8698, | 25733,   | 492170, | 2317.5166, |
| 5.803323 |         |            | 5.797443 |         |            | 5.791562 |         |            |
| 25658,   | 484376, | 2322.1611, | 25696,   | 486902, | 2319.8079, | 25734,   | 491734, | 2317.4547, |
| 5.803169 |         |            | 5.797288 |         |            | 5.791407 |         |            |

|          |         |            |          |         |            |          |         |            |
|----------|---------|------------|----------|---------|------------|----------|---------|------------|
| 25735,   | 491054, | 2317.3928, | 25773,   | 491778, | 2315.0395, | 25811,   | 499232, | 2312.6863, |
| 5.791252 |         |            | 5.785371 |         |            | 5.779491 |         |            |
| 25736,   | 490612, | 2317.3308, | 25774,   | 491678, | 2314.9776, | 25812,   | 499800, | 2312.6244, |
| 5.791097 |         |            | 5.785217 |         |            | 5.779336 |         |            |
| 25737,   | 490274, | 2317.2689, | 25775,   | 492270, | 2314.9157, | 25813,   | 500426, | 2312.5625, |
| 5.790943 |         |            | 5.785062 |         |            | 5.779181 |         |            |
| 25738,   | 489584, | 2317.2070, | 25776,   | 492914, | 2314.8538, | 25814,   | 500426, | 2312.5005, |
| 5.790788 |         |            | 5.784907 |         |            | 5.779026 |         |            |
| 25739,   | 488478, | 2317.1450, | 25777,   | 493092, | 2314.7918, | 25815,   | 499678, | 2312.4386, |
| 5.790633 |         |            | 5.784752 |         |            | 5.778872 |         |            |
| 25740,   | 487540, | 2317.0831, | 25778,   | 492976, | 2314.7299, | 25816,   | 498802, | 2312.3767, |
| 5.790478 |         |            | 5.784598 |         |            | 5.778717 |         |            |
| 25741,   | 487438, | 2317.0212, | 25779,   | 493100, | 2314.6680, | 25817,   | 498504, | 2312.3147, |
| 5.790324 |         |            | 5.784443 |         |            | 5.778562 |         |            |
| 25742,   | 488154, | 2316.9593, | 25780,   | 493692, | 2314.6060, | 25818,   | 498814, | 2312.2528, |
| 5.790169 |         |            | 5.784288 |         |            | 5.778407 |         |            |
| 25743,   | 488920, | 2316.8973, | 25781,   | 494412, | 2314.5441, | 25819,   | 499106, | 2312.1909, |
| 5.790014 |         |            | 5.784133 |         |            | 5.778253 |         |            |
| 25744,   | 488982, | 2316.8354, | 25782,   | 494774, | 2314.4822, | 25820,   | 498836, | 2312.1290, |
| 5.789859 |         |            | 5.783979 |         |            | 5.778098 |         |            |
| 25745,   | 488356, | 2316.7735, | 25783,   | 494734, | 2314.4203, | 25821,   | 498178, | 2312.0670, |
| 5.789705 |         |            | 5.783824 |         |            | 5.777943 |         |            |
| 25746,   | 487732, | 2316.7116, | 25784,   | 494694, | 2314.3583, | 25822,   | 497812, | 2312.0051, |
| 5.789550 |         |            | 5.783669 |         |            | 5.777788 |         |            |
| 25747,   | 487700, | 2316.6496, | 25785,   | 494992, | 2314.2964, | 25823,   | 498126, | 2311.9432, |
| 5.789395 |         |            | 5.783514 |         |            | 5.777634 |         |            |
| 25748,   | 488162, | 2316.5877, | 25786,   | 495532, | 2314.2345, | 25824,   | 498788, | 2311.8813, |
| 5.789240 |         |            | 5.783360 |         |            | 5.777479 |         |            |
| 25749,   | 488608, | 2316.5258, | 25787,   | 496006, | 2314.1726, | 25825,   | 499152, | 2311.8193, |
| 5.789086 |         |            | 5.783205 |         |            | 5.777324 |         |            |
| 25750,   | 488778, | 2316.4639, | 25788,   | 496366, | 2314.1106, | 25826,   | 498976, | 2311.7574, |
| 5.788931 |         |            | 5.783050 |         |            | 5.777169 |         |            |
| 25751,   | 488950, | 2316.4019, | 25789,   | 496914, | 2314.0487, | 25827,   | 498636, | 2311.6955, |
| 5.788776 |         |            | 5.782895 |         |            | 5.777015 |         |            |
| 25752,   | 489462, | 2316.3400, | 25790,   | 497832, | 2313.9868, | 25828,   | 498592, | 2311.6336, |
| 5.788621 |         |            | 5.782741 |         |            | 5.776860 |         |            |
| 25753,   | 490132, | 2316.2781, | 25791,   | 498778, | 2313.9248, | 25829,   | 498832, | 2311.5716, |
| 5.788467 |         |            | 5.782586 |         |            | 5.776705 |         |            |
| 25754,   | 490414, | 2316.2161, | 25792,   | 499122, | 2313.8629, | 25830,   | 498908, | 2311.5097, |
| 5.788312 |         |            | 5.782431 |         |            | 5.776550 |         |            |
| 25755,   | 490060, | 2316.1542, | 25793,   | 498664, | 2313.8010, | 25831,   | 498524, | 2311.4478, |
| 5.788157 |         |            | 5.782276 |         |            | 5.776396 |         |            |
| 25756,   | 489606, | 2316.0923, | 25794,   | 497956, | 2313.7391, | 25832,   | 497914, | 2311.3858, |
| 5.788002 |         |            | 5.782122 |         |            | 5.776241 |         |            |
| 25757,   | 489878, | 2316.0304, | 25795,   | 497854, | 2313.6771, | 25833,   | 497546, | 2311.3239, |
| 5.787848 |         |            | 5.781967 |         |            | 5.776086 |         |            |
| 25758,   | 491110, | 2315.9684, | 25796,   | 498648, | 2313.6152, | 25834,   | 497520, | 2311.2620, |
| 5.787693 |         |            | 5.781812 |         |            | 5.775931 |         |            |
| 25759,   | 492594, | 2315.9065, | 25797,   | 499772, | 2313.5533, | 25835,   | 497484, | 2311.2001, |
| 5.787538 |         |            | 5.781657 |         |            | 5.775776 |         |            |
| 25760,   | 493364, | 2315.8446, | 25798,   | 500382, | 2313.4914, | 25836,   | 497140, | 2311.1381, |
| 5.787383 |         |            | 5.781503 |         |            | 5.775622 |         |            |
| 25761,   | 493140, | 2315.7827, | 25799,   | 500164, | 2313.4294, | 25837,   | 496736, | 2311.0762, |
| 5.787229 |         |            | 5.781348 |         |            | 5.775467 |         |            |
| 25762,   | 492544, | 2315.7207, | 25800,   | 499516, | 2313.3675, | 25838,   | 496872, | 2311.0143, |
| 5.787074 |         |            | 5.781193 |         |            | 5.775312 |         |            |
| 25763,   | 492358, | 2315.6588, | 25801,   | 498984, | 2313.3056, | 25839,   | 497800, | 2310.9524, |
| 5.786919 |         |            | 5.781038 |         |            | 5.775157 |         |            |
| 25764,   | 492710, | 2315.5969, | 25802,   | 498672, | 2313.2437, | 25840,   | 499006, | 2310.8904, |
| 5.786764 |         |            | 5.780883 |         |            | 5.775003 |         |            |
| 25765,   | 493056, | 2315.5349, | 25803,   | 498318, | 2313.1817, | 25841,   | 499662, | 2310.8285, |
| 5.786610 |         |            | 5.780729 |         |            | 5.774848 |         |            |
| 25766,   | 492956, | 2315.4730, | 25804,   | 497812, | 2313.1198, | 25842,   | 499434, | 2310.7666, |
| 5.786455 |         |            | 5.780574 |         |            | 5.774693 |         |            |
| 25767,   | 492628, | 2315.4111, | 25805,   | 497486, | 2313.0579, | 25843,   | 498774, | 2310.7046, |
| 5.786300 |         |            | 5.780419 |         |            | 5.774538 |         |            |
| 25768,   | 492642, | 2315.3492, | 25806,   | 497742, | 2312.9959, | 25844,   | 498368, | 2310.6427, |
| 5.786145 |         |            | 5.780264 |         |            | 5.774384 |         |            |
| 25769,   | 493160, | 2315.2872, | 25807,   | 498496, | 2312.9340, | 25845,   | 498406, | 2310.5808, |
| 5.785990 |         |            | 5.780110 |         |            | 5.774229 |         |            |
| 25770,   | 493654, | 2315.2253, | 25808,   | 499180, | 2312.8721, | 25846,   | 498494, | 2310.5189, |
| 5.785836 |         |            | 5.779955 |         |            | 5.774074 |         |            |
| 25771,   | 493470, | 2315.1634, | 25809,   | 499338, | 2312.8102, | 25847,   | 498294, | 2310.4569, |
| 5.785681 |         |            | 5.779800 |         |            | 5.773919 |         |            |
| 25772,   | 492606, | 2315.1015, | 25810,   | 499162, | 2312.7482, | 25848,   | 498046, | 2310.3950, |
| 5.785526 |         |            | 5.779645 |         |            | 5.773765 |         |            |

|          |         |            |          |         |            |          |         |            |
|----------|---------|------------|----------|---------|------------|----------|---------|------------|
| 25849,   | 498314, | 2310.3331, | 25887,   | 501536, | 2307.9799, | 25925,   | 508146, | 2305.6266, |
| 5.773610 |         |            | 5.767729 |         |            | 5.761848 |         |            |
| 25850,   | 499300, | 2310.2712, | 25888,   | 501900, | 2307.9179, | 25926,   | 508560, | 2305.5647, |
| 5.773455 |         |            | 5.767574 |         |            | 5.761694 |         |            |
| 25851,   | 500488, | 2310.2092, | 25889,   | 502544, | 2307.8560, | 25927,   | 509156, | 2305.5028, |
| 5.773300 |         |            | 5.767420 |         |            | 5.761539 |         |            |
| 25852,   | 501154, | 2310.1473, | 25890,   | 502688, | 2307.7941, | 25928,   | 509250, | 2305.4409, |
| 5.773146 |         |            | 5.767265 |         |            | 5.761384 |         |            |
| 25853,   | 501096, | 2310.0854, | 25891,   | 502264, | 2307.7322, | 25929,   | 508814, | 2305.3789, |
| 5.772991 |         |            | 5.767110 |         |            | 5.761229 |         |            |
| 25854,   | 500812, | 2310.0235, | 25892,   | 501982, | 2307.6702, | 25930,   | 508540, | 2305.3170, |
| 5.772836 |         |            | 5.766955 |         |            | 5.761075 |         |            |
| 25855,   | 500876, | 2309.9615, | 25893,   | 502494, | 2307.6083, | 25931,   | 509052, | 2305.2551, |
| 5.772681 |         |            | 5.766801 |         |            | 5.760920 |         |            |
| 25856,   | 501290, | 2309.8996, | 25894,   | 503618, | 2307.5464, | 25932,   | 510138, | 2305.1932, |
| 5.772527 |         |            | 5.766646 |         |            | 5.760765 |         |            |
| 25857,   | 501570, | 2309.8377, | 25895,   | 504492, | 2307.4844, | 25933,   | 510962, | 2305.1312, |
| 5.772372 |         |            | 5.766491 |         |            | 5.760610 |         |            |
| 25858,   | 501398, | 2309.7757, | 25896,   | 504492, | 2307.4225, | 25934,   | 510942, | 2305.0693, |
| 5.772217 |         |            | 5.766336 |         |            | 5.760455 |         |            |
| 25859,   | 501068, | 2309.7138, | 25897,   | 503834, | 2307.3606, | 25935,   | 510392, | 2305.0074, |
| 5.772062 |         |            | 5.766182 |         |            | 5.760301 |         |            |
| 25860,   | 501072, | 2309.6519, | 25898,   | 503222, | 2307.2987, | 25936,   | 510104, | 2304.9454, |
| 5.771908 |         |            | 5.766027 |         |            | 5.760146 |         |            |
| 25861,   | 501468, | 2309.5900, | 25899,   | 503028, | 2307.2367, | 25937,   | 510448, | 2304.8835, |
| 5.771753 |         |            | 5.765872 |         |            | 5.759991 |         |            |
| 25862,   | 501704, | 2309.5280, | 25900,   | 502968, | 2307.1748, | 25938,   | 510952, | 2304.8216, |
| 5.771598 |         |            | 5.765717 |         |            | 5.759836 |         |            |
| 25863,   | 501266, | 2309.4661, | 25901,   | 502616, | 2307.1129, | 25939,   | 510870, | 2304.7597, |
| 5.771443 |         |            | 5.765562 |         |            | 5.759682 |         |            |
| 25864,   | 500360, | 2309.4042, | 25902,   | 502046, | 2307.0510, | 25940,   | 510028, | 2304.6977, |
| 5.771289 |         |            | 5.765408 |         |            | 5.759527 |         |            |
| 25865,   | 499814, | 2309.3423, | 25903,   | 501780, | 2306.9890, | 25941,   | 509028, | 2304.6358, |
| 5.771134 |         |            | 5.765253 |         |            | 5.759372 |         |            |
| 25866,   | 500244, | 2309.2803, | 25904,   | 502122, | 2306.9271, | 25942,   | 508564, | 2304.5739, |
| 5.770979 |         |            | 5.765098 |         |            | 5.759217 |         |            |
| 25867,   | 501406, | 2309.2184, | 25905,   | 502714, | 2306.8652, | 25943,   | 508714, | 2304.5120, |
| 5.770824 |         |            | 5.764943 |         |            | 5.759063 |         |            |
| 25868,   | 502460, | 2309.1565, | 25906,   | 502948, | 2306.8033, | 25944,   | 508908, | 2304.4500, |
| 5.770669 |         |            | 5.764789 |         |            | 5.758908 |         |            |
| 25869,   | 502800, | 2309.0945, | 25907,   | 502730, | 2306.7413, | 25945,   | 508648, | 2304.3881, |
| 5.770515 |         |            | 5.764634 |         |            | 5.758753 |         |            |
| 25870,   | 502564, | 2309.0326, | 25908,   | 502702, | 2306.6794, | 25946,   | 507980, | 2304.3262, |
| 5.770360 |         |            | 5.764479 |         |            | 5.758598 |         |            |
| 25871,   | 502286, | 2308.9707, | 25909,   | 503526, | 2306.6175, | 25947,   | 507346, | 2304.2642, |
| 5.770205 |         |            | 5.764324 |         |            | 5.758444 |         |            |
| 25872,   | 502236, | 2308.9088, | 25910,   | 505072, | 2306.5555, | 25948,   | 507020, | 2304.2023, |
| 5.770050 |         |            | 5.764170 |         |            | 5.758289 |         |            |
| 25873,   | 502194, | 2308.8468, | 25911,   | 506436, | 2306.4936, | 25949,   | 506814, | 2304.1404, |
| 5.769896 |         |            | 5.764015 |         |            | 5.758134 |         |            |
| 25874,   | 501948, | 2308.7849, | 25912,   | 506828, | 2306.4317, | 25950,   | 506418, | 2304.0785, |
| 5.769741 |         |            | 5.763860 |         |            | 5.757979 |         |            |
| 25875,   | 501728, | 2308.7230, | 25913,   | 506408, | 2306.3698, | 25951,   | 505850, | 2304.0165, |
| 5.769586 |         |            | 5.763705 |         |            | 5.757825 |         |            |
| 25876,   | 502006, | 2308.6611, | 25914,   | 506024, | 2306.3078, | 25952,   | 505462, | 2303.9546, |
| 5.769431 |         |            | 5.763551 |         |            | 5.757670 |         |            |
| 25877,   | 502878, | 2308.5991, | 25915,   | 506324, | 2306.2459, | 25953,   | 505546, | 2303.8927, |
| 5.769277 |         |            | 5.763396 |         |            | 5.757515 |         |            |
| 25878,   | 503818, | 2308.5372, | 25916,   | 507104, | 2306.1840, | 25954,   | 506056, | 2303.8308, |
| 5.769122 |         |            | 5.763241 |         |            | 5.757360 |         |            |
| 25879,   | 504178, | 2308.4753, | 25917,   | 507702, | 2306.1221, | 25955,   | 506738, | 2303.7688, |
| 5.768967 |         |            | 5.763086 |         |            | 5.757206 |         |            |
| 25880,   | 503910, | 2308.4134, | 25918,   | 507820, | 2306.0601, | 25956,   | 507504, | 2303.7069, |
| 5.768812 |         |            | 5.762932 |         |            | 5.757051 |         |            |
| 25881,   | 503582, | 2308.3514, | 25919,   | 507840, | 2305.9982, | 25957,   | 508460, | 2303.6450, |
| 5.768658 |         |            | 5.762777 |         |            | 5.756896 |         |            |
| 25882,   | 503708, | 2308.2895, | 25920,   | 508250, | 2305.9363, | 25958,   | 509624, | 2303.5831, |
| 5.768503 |         |            | 5.762622 |         |            | 5.756741 |         |            |
| 25883,   | 504080, | 2308.2276, | 25921,   | 508964, | 2305.8743, | 25959,   | 510690, | 2303.5211, |
| 5.768348 |         |            | 5.762467 |         |            | 5.756587 |         |            |
| 25884,   | 504010, | 2308.1656, | 25922,   | 509364, | 2305.8124, | 25960,   | 511248, | 2303.4592, |
| 5.768193 |         |            | 5.762313 |         |            | 5.756432 |         |            |
| 25885,   | 503166, | 2308.1037, | 25923,   | 509064, | 2305.7505, | 25961,   | 511240, | 2303.3973, |
| 5.768039 |         |            | 5.762158 |         |            | 5.756277 |         |            |
| 25886,   | 502056, | 2308.0418, | 25924,   | 508408, | 2305.6886, | 25962,   | 511082, | 2303.3353, |
| 5.767884 |         |            | 5.762003 |         |            | 5.756122 |         |            |

|          |         |            |          |         |            |          |         |            |
|----------|---------|------------|----------|---------|------------|----------|---------|------------|
| 25963,   | 511234, | 2303.2734, | 26001,   | 513154, | 2300.9202, | 26039,   | 517626, | 2298.5670, |
| 5.755968 |         |            | 5.750087 |         |            | 5.744206 |         |            |
| 25964,   | 511728, | 2303.2115, | 26002,   | 514232, | 2300.8583, | 26040,   | 518206, | 2298.5050, |
| 5.755813 |         |            | 5.749932 |         |            | 5.744051 |         |            |
| 25965,   | 512166, | 2303.1496, | 26003,   | 515284, | 2300.7963, | 26041,   | 518822, | 2298.4431, |
| 5.755658 |         |            | 5.749777 |         |            | 5.743896 |         |            |
| 25966,   | 512226, | 2303.0876, | 26004,   | 515440, | 2300.7344, | 26042,   | 519070, | 2298.3812, |
| 5.755503 |         |            | 5.749622 |         |            | 5.743742 |         |            |
| 25967,   | 512060, | 2303.0257, | 26005,   | 514942, | 2300.6725, | 26043,   | 519096, | 2298.3193, |
| 5.755348 |         |            | 5.749468 |         |            | 5.743587 |         |            |
| 25968,   | 512078, | 2302.9638, | 26006,   | 514804, | 2300.6106, | 26044,   | 519374, | 2298.2573, |
| 5.755194 |         |            | 5.749313 |         |            | 5.743432 |         |            |
| 25969,   | 512428, | 2302.9019, | 26007,   | 515584, | 2300.5486, | 26045,   | 520040, | 2298.1954, |
| 5.755039 |         |            | 5.749158 |         |            | 5.743277 |         |            |
| 25970,   | 512750, | 2302.8399, | 26008,   | 516678, | 2300.4867, | 26046,   | 520582, | 2298.1335, |
| 5.754884 |         |            | 5.749003 |         |            | 5.743123 |         |            |
| 25971,   | 512606, | 2302.7780, | 26009,   | 516934, | 2300.4248, | 26047,   | 520378, | 2298.0716, |
| 5.754729 |         |            | 5.748849 |         |            | 5.742968 |         |            |
| 25972,   | 512024, | 2302.7161, | 26010,   | 515904, | 2300.3629, | 26048,   | 519402, | 2298.0096, |
| 5.754575 |         |            | 5.748694 |         |            | 5.742813 |         |            |
| 25973,   | 511490, | 2302.6542, | 26011,   | 514310, | 2300.3009, | 26049,   | 518308, | 2297.9477, |
| 5.754420 |         |            | 5.748539 |         |            | 5.742658 |         |            |
| 25974,   | 511390, | 2302.5922, | 26012,   | 513262, | 2300.2390, | 26050,   | 517756, | 2297.8858, |
| 5.754265 |         |            | 5.748384 |         |            | 5.742504 |         |            |
| 25975,   | 511532, | 2302.5303, | 26013,   | 513150, | 2300.1771, | 26051,   | 517734, | 2297.8239, |
| 5.754110 |         |            | 5.748230 |         |            | 5.742349 |         |            |
| 25976,   | 511380, | 2302.4684, | 26014,   | 513414, | 2300.1151, | 26052,   | 517698, | 2297.7619, |
| 5.753956 |         |            | 5.748075 |         |            | 5.742194 |         |            |
| 25977,   | 510684, | 2302.4064, | 26015,   | 513380, | 2300.0532, | 26053,   | 517336, | 2297.7000, |
| 5.753801 |         |            | 5.747920 |         |            | 5.742039 |         |            |
| 25978,   | 509838, | 2302.3445, | 26016,   | 513108, | 2299.9913, | 26054,   | 516990, | 2297.6381, |
| 5.753646 |         |            | 5.747765 |         |            | 5.741885 |         |            |
| 25979,   | 509482, | 2302.2826, | 26017,   | 513234, | 2299.9294, | 26055,   | 517298, | 2297.5761, |
| 5.753491 |         |            | 5.747611 |         |            | 5.741730 |         |            |
| 25980,   | 509798, | 2302.2207, | 26018,   | 514070, | 2299.8674, | 26056,   | 518388, | 2297.5142, |
| 5.753337 |         |            | 5.747456 |         |            | 5.741575 |         |            |
| 25981,   | 510402, | 2302.1587, | 26019,   | 515102, | 2299.8055, | 26057,   | 519658, | 2297.4523, |
| 5.753182 |         |            | 5.747301 |         |            | 5.741420 |         |            |
| 25982,   | 510874, | 2302.0968, | 26020,   | 515498, | 2299.7436, | 26058,   | 520368, | 2297.3904, |
| 5.753027 |         |            | 5.747146 |         |            | 5.741266 |         |            |
| 25983,   | 511286, | 2302.0349, | 26021,   | 515050, | 2299.6817, | 26059,   | 520426, | 2297.3284, |
| 5.752872 |         |            | 5.746992 |         |            | 5.741111 |         |            |
| 25984,   | 512036, | 2301.9730, | 26022,   | 514440, | 2299.6197, | 26060,   | 520386, | 2297.2665, |
| 5.752718 |         |            | 5.746837 |         |            | 5.740956 |         |            |
| 25985,   | 513226, | 2301.9110, | 26023,   | 514518, | 2299.5578, | 26061,   | 520760, | 2297.2046, |
| 5.752563 |         |            | 5.746682 |         |            | 5.740801 |         |            |
| 25986,   | 514316, | 2301.8491, | 26024,   | 515404, | 2299.4959, | 26062,   | 521418, | 2297.1427, |
| 5.752408 |         |            | 5.746527 |         |            | 5.740646 |         |            |
| 25987,   | 514628, | 2301.7872, | 26025,   | 516440, | 2299.4340, | 26063,   | 521790, | 2297.0807, |
| 5.752253 |         |            | 5.746373 |         |            | 5.740492 |         |            |
| 25988,   | 514104, | 2301.7252, | 26026,   | 516982, | 2299.3720, | 26064,   | 521590, | 2297.0188, |
| 5.752099 |         |            | 5.746218 |         |            | 5.740337 |         |            |
| 25989,   | 513412, | 2301.6633, | 26027,   | 517036, | 2299.3101, | 26065,   | 521188, | 2296.9569, |
| 5.751944 |         |            | 5.746063 |         |            | 5.740182 |         |            |
| 25990,   | 513234, | 2301.6014, | 26028,   | 517128, | 2299.2482, | 26066,   | 521148, | 2296.8949, |
| 5.751789 |         |            | 5.745908 |         |            | 5.740027 |         |            |
| 25991,   | 513516, | 2301.5395, | 26029,   | 517550, | 2299.1862, | 26067,   | 521508, | 2296.8330, |
| 5.751634 |         |            | 5.745753 |         |            | 5.739873 |         |            |
| 25992,   | 513594, | 2301.4775, | 26030,   | 518010, | 2299.1243, | 26068,   | 521714, | 2296.7711, |
| 5.751480 |         |            | 5.745599 |         |            | 5.739718 |         |            |
| 25993,   | 513086, | 2301.4156, | 26031,   | 518044, | 2299.0624, | 26069,   | 521260, | 2296.7092, |
| 5.751325 |         |            | 5.745444 |         |            | 5.739563 |         |            |
| 25994,   | 512466, | 2301.3537, | 26032,   | 517652, | 2299.0005, | 26070,   | 520324, | 2296.6472, |
| 5.751170 |         |            | 5.745289 |         |            | 5.739408 |         |            |
| 25995,   | 512582, | 2301.2918, | 26033,   | 517338, | 2298.9385, | 26071,   | 519616, | 2296.5853, |
| 5.751015 |         |            | 5.745134 |         |            | 5.739254 |         |            |
| 25996,   | 513614, | 2301.2298, | 26034,   | 517506, | 2298.8766, | 26072,   | 519612, | 2296.5234, |
| 5.750860 |         |            | 5.744980 |         |            | 5.739099 |         |            |
| 25997,   | 514734, | 2301.1679, | 26035,   | 517970, | 2298.8147, | 26073,   | 520078, | 2296.4615, |
| 5.750706 |         |            | 5.744825 |         |            | 5.738944 |         |            |
| 25998,   | 514900, | 2301.1060, | 26036,   | 518188, | 2298.7528, | 26074,   | 520396, | 2296.3995, |
| 5.750551 |         |            | 5.744670 |         |            | 5.738789 |         |            |
| 25999,   | 514016, | 2301.0441, | 26037,   | 517920, | 2298.6908, | 26075,   | 520310, | 2296.3376, |
| 5.750396 |         |            | 5.744515 |         |            | 5.738635 |         |            |
| 26000,   | 513082, | 2300.9821, | 26038,   | 517554, | 2298.6289, | 26076,   | 520184, | 2296.2757, |
| 5.750241 |         |            | 5.744361 |         |            | 5.738480 |         |            |



|          |         |            |          |         |            |          |         |            |
|----------|---------|------------|----------|---------|------------|----------|---------|------------|
| 26077,   | 520482, | 2296.2138, | 26115,   | 522504, | 2293.8605, | 26153,   | 527840, | 2291.5073, |
| 5.738325 |         |            | 5.732444 |         |            | 5.726564 |         |            |
| 26078,   | 521164, | 2296.1518, | 26116,   | 523624, | 2293.7986, | 26154,   | 528160, | 2291.4454, |
| 5.738170 |         |            | 5.732290 |         |            | 5.726409 |         |            |
| 26079,   | 521726, | 2296.0899, | 26117,   | 524690, | 2293.7367, | 26155,   | 528412, | 2291.3835, |
| 5.738016 |         |            | 5.732135 |         |            | 5.726254 |         |            |
| 26080,   | 521806, | 2296.0280, | 26118,   | 525128, | 2293.6747, | 26156,   | 528380, | 2291.3215, |
| 5.737861 |         |            | 5.731980 |         |            | 5.726099 |         |            |
| 26081,   | 521668, | 2295.9660, | 26119,   | 525188, | 2293.6128, | 26157,   | 528372, | 2291.2596, |
| 5.737706 |         |            | 5.731825 |         |            | 5.725945 |         |            |
| 26082,   | 521864, | 2295.9041, | 26120,   | 525562, | 2293.5509, | 26158,   | 528820, | 2291.1977, |
| 5.737551 |         |            | 5.731671 |         |            | 5.725790 |         |            |
| 26083,   | 522550, | 2295.8422, | 26121,   | 526544, | 2293.4890, | 26159,   | 529634, | 2291.1357, |
| 5.737397 |         |            | 5.731516 |         |            | 5.725635 |         |            |
| 26084,   | 523236, | 2295.7803, | 26122,   | 527716, | 2293.4270, | 26160,   | 530238, | 2291.0738, |
| 5.737242 |         |            | 5.731361 |         |            | 5.725480 |         |            |
| 26085,   | 523336, | 2295.7183, | 26123,   | 528476, | 2293.3651, | 26161,   | 530202, | 2291.0119, |
| 5.737087 |         |            | 5.731206 |         |            | 5.725325 |         |            |
| 26086,   | 522838, | 2295.6564, | 26124,   | 528766, | 2293.3032, | 26162,   | 529742, | 2290.9500, |
| 5.736932 |         |            | 5.731052 |         |            | 5.725171 |         |            |
| 26087,   | 522364, | 2295.5945, | 26125,   | 529104, | 2293.2413, | 26163,   | 529484, | 2290.8880, |
| 5.736778 |         |            | 5.730897 |         |            | 5.725016 |         |            |
| 26088,   | 522464, | 2295.5326, | 26126,   | 529896, | 2293.1793, | 26164,   | 529746, | 2290.8261, |
| 5.736623 |         |            | 5.730742 |         |            | 5.724861 |         |            |
| 26089,   | 523022, | 2295.4706, | 26127,   | 530884, | 2293.1174, | 26165,   | 530166, | 2290.7642, |
| 5.736468 |         |            | 5.730587 |         |            | 5.724706 |         |            |
| 26090,   | 523438, | 2295.4087, | 26128,   | 531390, | 2293.0555, | 26166,   | 530188, | 2290.7023, |
| 5.736313 |         |            | 5.730432 |         |            | 5.724552 |         |            |
| 26091,   | 523330, | 2295.3468, | 26129,   | 531064, | 2292.9936, | 26167,   | 529794, | 2290.6403, |
| 5.736159 |         |            | 5.730278 |         |            | 5.724397 |         |            |
| 26092,   | 522950, | 2295.2848, | 26130,   | 530262, | 2292.9316, | 26168,   | 529624, | 2290.5784, |
| 5.736004 |         |            | 5.730123 |         |            | 5.724242 |         |            |
| 26093,   | 522814, | 2295.2229, | 26131,   | 529604, | 2292.8697, | 26169,   | 530332, | 2290.5165, |
| 5.735849 |         |            | 5.729968 |         |            | 5.724087 |         |            |
| 26094,   | 523052, | 2295.1610, | 26132,   | 529274, | 2292.8078, | 26170,   | 531842, | 2290.4545, |
| 5.735694 |         |            | 5.729813 |         |            | 5.723933 |         |            |
| 26095,   | 523310, | 2295.0991, | 26133,   | 528874, | 2292.7458, | 26171,   | 533404, | 2290.3926, |
| 5.735539 |         |            | 5.729659 |         |            | 5.723778 |         |            |
| 26096,   | 523260, | 2295.0371, | 26134,   | 528010, | 2292.6839, | 26172,   | 534324, | 2290.3307, |
| 5.735385 |         |            | 5.729504 |         |            | 5.723623 |         |            |
| 26097,   | 523108, | 2294.9752, | 26135,   | 526836, | 2292.6220, | 26173,   | 534564, | 2290.2688, |
| 5.735230 |         |            | 5.729349 |         |            | 5.723468 |         |            |
| 26098,   | 523382, | 2294.9133, | 26136,   | 525958, | 2292.5601, | 26174,   | 534552, | 2290.2068, |
| 5.735075 |         |            | 5.729194 |         |            | 5.723314 |         |            |
| 26099,   | 524248, | 2294.8514, | 26137,   | 525746, | 2292.4981, | 26175,   | 534558, | 2290.1449, |
| 5.734920 |         |            | 5.729040 |         |            | 5.723159 |         |            |
| 26100,   | 525168, | 2294.7894, | 26138,   | 525984, | 2292.4362, | 26176,   | 534414, | 2290.0830, |
| 5.734766 |         |            | 5.728885 |         |            | 5.723004 |         |            |
| 26101,   | 525410, | 2294.7275, | 26139,   | 526174, | 2292.3743, | 26177,   | 533864, | 2290.0211, |
| 5.734611 |         |            | 5.728730 |         |            | 5.722849 |         |            |
| 26102,   | 524822, | 2294.6656, | 26140,   | 526214, | 2292.3124, | 26178,   | 533092, | 2289.9591, |
| 5.734456 |         |            | 5.728575 |         |            | 5.722695 |         |            |
| 26103,   | 524040, | 2294.6037, | 26141,   | 526524, | 2292.2504, | 26179,   | 532636, | 2289.8972, |
| 5.734301 |         |            | 5.728421 |         |            | 5.722540 |         |            |
| 26104,   | 523830, | 2294.5417, | 26142,   | 527492, | 2292.1885, | 26180,   | 532760, | 2289.8353, |
| 5.734147 |         |            | 5.728266 |         |            | 5.722385 |         |            |
| 26105,   | 524284, | 2294.4798, | 26143,   | 528916, | 2292.1266, | 26181,   | 533094, | 2289.7734, |
| 5.733992 |         |            | 5.728111 |         |            | 5.722230 |         |            |
| 26106,   | 524844, | 2294.4179, | 26144,   | 530096, | 2292.0646, | 26182,   | 533012, | 2289.7114, |
| 5.733837 |         |            | 5.727956 |         |            | 5.722076 |         |            |
| 26107,   | 524966, | 2294.3559, | 26145,   | 530530, | 2292.0027, | 26183,   | 532414, | 2289.6495, |
| 5.733682 |         |            | 5.727802 |         |            | 5.721921 |         |            |
| 26108,   | 524724, | 2294.2940, | 26146,   | 530380, | 2291.9408, | 26184,   | 531932, | 2289.5876, |
| 5.733528 |         |            | 5.727647 |         |            | 5.721766 |         |            |
| 26109,   | 524568, | 2294.2321, | 26147,   | 530188, | 2291.8789, | 26185,   | 532292, | 2289.5256, |
| 5.733373 |         |            | 5.727492 |         |            | 5.721611 |         |            |
| 26110,   | 524666, | 2294.1702, | 26148,   | 530210, | 2291.8169, | 26186,   | 533492, | 2289.4637, |
| 5.733218 |         |            | 5.727337 |         |            | 5.721457 |         |            |
| 26111,   | 524608, | 2294.1082, | 26149,   | 530156, | 2291.7550, | 26187,   | 534728, | 2289.4018, |
| 5.733063 |         |            | 5.727183 |         |            | 5.721302 |         |            |
| 26112,   | 523942, | 2294.0463, | 26150,   | 529622, | 2291.6931, | 26188,   | 535222, | 2289.3399, |
| 5.732909 |         |            | 5.727028 |         |            | 5.721147 |         |            |
| 26113,   | 522862, | 2293.9844, | 26151,   | 528708, | 2291.6312, | 26189,   | 534956, | 2289.2779, |
| 5.732754 |         |            | 5.726873 |         |            | 5.720992 |         |            |
| 26114,   | 522176, | 2293.9225, | 26152,   | 527970, | 2291.5692, | 26190,   | 534620, | 2289.2160, |
| 5.732599 |         |            | 5.726718 |         |            | 5.720838 |         |            |

|          |         |            |          |         |            |          |         |            |
|----------|---------|------------|----------|---------|------------|----------|---------|------------|
| 26191,   | 534786, | 2289.1541, | 26229,   | 536656, | 2286.8009, | 26267,   | 538808, | 2284.4476, |
| 5.720683 |         |            | 5.714802 |         |            | 5.708921 |         |            |
| 26192,   | 535300, | 2289.0922, | 26230,   | 537620, | 2286.7389, | 26268,   | 539420, | 2284.3857, |
| 5.720528 |         |            | 5.714647 |         |            | 5.708766 |         |            |
| 26193,   | 535574, | 2289.0302, | 26231,   | 538324, | 2286.6770, | 26269,   | 539640, | 2284.3238, |
| 5.720373 |         |            | 5.714492 |         |            | 5.708612 |         |            |
| 26194,   | 535310, | 2288.9683, | 26232,   | 538446, | 2286.6151, | 26270,   | 539370, | 2284.2619, |
| 5.720218 |         |            | 5.714338 |         |            | 5.708457 |         |            |
| 26195,   | 534816, | 2288.9064, | 26233,   | 538386, | 2286.5532, | 26271,   | 539140, | 2284.1999, |
| 5.720064 |         |            | 5.714183 |         |            | 5.708302 |         |            |
| 26196,   | 534548, | 2288.8445, | 26234,   | 538742, | 2286.4912, | 26272,   | 539454, | 2284.1380, |
| 5.719909 |         |            | 5.714028 |         |            | 5.708147 |         |            |
| 26197,   | 534518, | 2288.7825, | 26235,   | 539594, | 2286.4293, | 26273,   | 540242, | 2284.0761, |
| 5.719754 |         |            | 5.713873 |         |            | 5.707993 |         |            |
| 26198,   | 534334, | 2288.7206, | 26236,   | 540448, | 2286.3674, | 26274,   | 540990, | 2284.0142, |
| 5.719599 |         |            | 5.713719 |         |            | 5.707838 |         |            |
| 26199,   | 533802, | 2288.6587, | 26237,   | 540866, | 2286.3054, | 26275,   | 541458, | 2283.9522, |
| 5.719445 |         |            | 5.713564 |         |            | 5.707683 |         |            |
| 26200,   | 533296, | 2288.5967, | 26238,   | 540942, | 2286.2435, | 26276,   | 541976, | 2283.8903, |
| 5.719290 |         |            | 5.713409 |         |            | 5.707528 |         |            |
| 26201,   | 533394, | 2288.5348, | 26239,   | 541128, | 2286.1816, | 26277,   | 543004, | 2283.8284, |
| 5.719135 |         |            | 5.713254 |         |            | 5.707374 |         |            |
| 26202,   | 534074, | 2288.4729, | 26240,   | 541602, | 2286.1197, | 26278,   | 544444, | 2283.7664, |
| 5.718980 |         |            | 5.713100 |         |            | 5.707219 |         |            |
| 26203,   | 534600, | 2288.4110, | 26241,   | 542060, | 2286.0577, | 26279,   | 545590, | 2283.7045, |
| 5.718826 |         |            | 5.712945 |         |            | 5.707064 |         |            |
| 26204,   | 534204, | 2288.3490, | 26242,   | 542116, | 2285.9958, | 26280,   | 545822, | 2283.6426, |
| 5.718671 |         |            | 5.712790 |         |            | 5.706909 |         |            |
| 26205,   | 532998, | 2288.2871, | 26243,   | 541846, | 2285.9339, | 26281,   | 545276, | 2283.5807, |
| 5.718516 |         |            | 5.712635 |         |            | 5.706755 |         |            |
| 26206,   | 531970, | 2288.2252, | 26244,   | 541718, | 2285.8720, | 26282,   | 544752, | 2283.5187, |
| 5.718361 |         |            | 5.712481 |         |            | 5.706600 |         |            |
| 26207,   | 532056, | 2288.1633, | 26245,   | 541970, | 2285.8100, | 26283,   | 544848, | 2283.4568, |
| 5.718207 |         |            | 5.712326 |         |            | 5.706445 |         |            |
| 26208,   | 533270, | 2288.1013, | 26246,   | 542250, | 2285.7481, | 26284,   | 545392, | 2283.3949, |
| 5.718052 |         |            | 5.712171 |         |            | 5.706290 |         |            |
| 26209,   | 534726, | 2288.0394, | 26247,   | 541972, | 2285.6862, | 26285,   | 545726, | 2283.3330, |
| 5.717897 |         |            | 5.712016 |         |            | 5.706136 |         |            |
| 26210,   | 535556, | 2287.9775, | 26248,   | 541088, | 2285.6243, | 26286,   | 545472, | 2283.2710, |
| 5.717742 |         |            | 5.711862 |         |            | 5.705981 |         |            |
| 26211,   | 535630, | 2287.9155, | 26249,   | 540290, | 2285.5623, | 26287,   | 544922, | 2283.2091, |
| 5.717588 |         |            | 5.711707 |         |            | 5.705826 |         |            |
| 26212,   | 535402, | 2287.8536, | 26250,   | 540340, | 2285.5004, | 26288,   | 544648, | 2283.1472, |
| 5.717433 |         |            | 5.711552 |         |            | 5.705671 |         |            |
| 26213,   | 535184, | 2287.7917, | 26251,   | 541260, | 2285.4385, | 26289,   | 544818, | 2283.0852, |
| 5.717278 |         |            | 5.711397 |         |            | 5.705516 |         |            |
| 26214,   | 534820, | 2287.7298, | 26252,   | 542230, | 2285.3765, | 26290,   | 545094, | 2283.0233, |
| 5.717123 |         |            | 5.711243 |         |            | 5.705362 |         |            |
| 26215,   | 534038, | 2287.6678, | 26253,   | 542396, | 2285.3146, | 26291,   | 545138, | 2282.9614, |
| 5.716969 |         |            | 5.711088 |         |            | 5.705207 |         |            |
| 26216,   | 533014, | 2287.6059, | 26254,   | 541686, | 2285.2527, | 26292,   | 545052, | 2282.8995, |
| 5.716814 |         |            | 5.710933 |         |            | 5.705052 |         |            |
| 26217,   | 532348, | 2287.5440, | 26255,   | 540800, | 2285.1908, | 26293,   | 545214, | 2282.8375, |
| 5.716659 |         |            | 5.710778 |         |            | 5.704897 |         |            |
| 26218,   | 532460, | 2287.4821, | 26256,   | 540424, | 2285.1288, | 26294,   | 545698, | 2282.7756, |
| 5.716504 |         |            | 5.710624 |         |            | 5.704743 |         |            |
| 26219,   | 533110, | 2287.4201, | 26257,   | 540580, | 2285.0669, | 26295,   | 546106, | 2282.7137, |
| 5.716350 |         |            | 5.710469 |         |            | 5.704588 |         |            |
| 26220,   | 533724, | 2287.3582, | 26258,   | 540798, | 2285.0050, | 26296,   | 545988, | 2282.6518, |
| 5.716195 |         |            | 5.710314 |         |            | 5.704433 |         |            |
| 26221,   | 534046, | 2287.2963, | 26259,   | 540778, | 2284.9431, | 26297,   | 545460, | 2282.5898, |
| 5.716040 |         |            | 5.710159 |         |            | 5.704278 |         |            |
| 26222,   | 534430, | 2287.2344, | 26260,   | 540680, | 2284.8811, | 26298,   | 545106, | 2282.5279, |
| 5.715885 |         |            | 5.710004 |         |            | 5.704124 |         |            |
| 26223,   | 535282, | 2287.1724, | 26261,   | 540770, | 2284.8192, | 26299,   | 545324, | 2282.4660, |
| 5.715731 |         |            | 5.709850 |         |            | 5.703969 |         |            |
| 26224,   | 536450, | 2287.1105, | 26262,   | 540918, | 2284.7573, | 26300,   | 545818, | 2282.4041, |
| 5.715576 |         |            | 5.709695 |         |            | 5.703814 |         |            |
| 26225,   | 537232, | 2287.0486, | 26263,   | 540674, | 2284.6953, | 26301,   | 545922, | 2282.3421, |
| 5.715421 |         |            | 5.709540 |         |            | 5.703659 |         |            |
| 26226,   | 537148, | 2286.9866, | 26264,   | 539852, | 2284.6334, | 26302,   | 545394, | 2282.2802, |
| 5.715266 |         |            | 5.709385 |         |            | 5.703505 |         |            |
| 26227,   | 536516, | 2286.9247, | 26265,   | 538884, | 2284.5715, | 26303,   | 544764, | 2282.2183, |
| 5.715111 |         |            | 5.709231 |         |            | 5.703350 |         |            |
| 26228,   | 536178, | 2286.8628, | 26266,   | 538464, | 2284.5096, | 26304,   | 544812, | 2282.1563, |
| 5.714957 |         |            | 5.709076 |         |            | 5.703195 |         |            |

|          |         |            |          |         |            |          |         |            |
|----------|---------|------------|----------|---------|------------|----------|---------|------------|
| 26305,   | 545720, | 2282.0944, | 26343,   | 549166, | 2279.7412, | 26381,   | 555920, | 2277.3880, |
| 5.703040 |         |            | 5.697160 |         |            | 5.691279 |         |            |
| 26306,   | 546878, | 2282.0325, | 26344,   | 550362, | 2279.6793, | 26382,   | 556912, | 2277.3260, |
| 5.702886 |         |            | 5.697005 |         |            | 5.691124 |         |            |
| 26307,   | 547540, | 2281.9706, | 26345,   | 550660, | 2279.6173, | 26383,   | 557212, | 2277.2641, |
| 5.702731 |         |            | 5.696850 |         |            | 5.690969 |         |            |
| 26308,   | 547592, | 2281.9086, | 26346,   | 550078, | 2279.5554, | 26384,   | 556948, | 2277.2022, |
| 5.702576 |         |            | 5.696695 |         |            | 5.690815 |         |            |
| 26309,   | 547490, | 2281.8467, | 26347,   | 549304, | 2279.4935, | 26385,   | 556764, | 2277.1403, |
| 5.702421 |         |            | 5.696541 |         |            | 5.690660 |         |            |
| 26310,   | 547628, | 2281.7848, | 26348,   | 548944, | 2279.4316, | 26386,   | 557010, | 2277.0783, |
| 5.702267 |         |            | 5.696386 |         |            | 5.690505 |         |            |
| 26311,   | 547804, | 2281.7229, | 26349,   | 548946, | 2279.3696, | 26387,   | 557334, | 2277.0164, |
| 5.702112 |         |            | 5.696231 |         |            | 5.690350 |         |            |
| 26312,   | 547574, | 2281.6609, | 26350,   | 548862, | 2279.3077, | 26388,   | 557154, | 2276.9545, |
| 5.701957 |         |            | 5.696076 |         |            | 5.690195 |         |            |
| 26313,   | 546924, | 2281.5990, | 26351,   | 548546, | 2279.2458, | 26389,   | 556412, | 2276.8926, |
| 5.701802 |         |            | 5.695922 |         |            | 5.690041 |         |            |
| 26314,   | 546472, | 2281.5371, | 26352,   | 548382, | 2279.1839, | 26390,   | 555708, | 2276.8306, |
| 5.701648 |         |            | 5.695767 |         |            | 5.689886 |         |            |
| 26315,   | 546788, | 2281.4751, | 26353,   | 548824, | 2279.1219, | 26391,   | 555640, | 2276.7687, |
| 5.701493 |         |            | 5.695612 |         |            | 5.689731 |         |            |
| 26316,   | 547670, | 2281.4132, | 26354,   | 549760, | 2279.0600, | 26392,   | 556158, | 2276.7068, |
| 5.701338 |         |            | 5.695457 |         |            | 5.689576 |         |            |
| 26317,   | 548246, | 2281.3513, | 26355,   | 550558, | 2278.9981, | 26393,   | 556636, | 2276.6449, |
| 5.701183 |         |            | 5.695302 |         |            | 5.689422 |         |            |
| 26318,   | 547892, | 2281.2894, | 26356,   | 550748, | 2278.9361, | 26394,   | 556636, | 2276.5829, |
| 5.701029 |         |            | 5.695148 |         |            | 5.689267 |         |            |
| 26319,   | 546954, | 2281.2274, | 26357,   | 550518, | 2278.8742, | 26395,   | 556352, | 2276.5210, |
| 5.700874 |         |            | 5.694993 |         |            | 5.689112 |         |            |
| 26320,   | 546438, | 2281.1655, | 26358,   | 550472, | 2278.8123, | 26396,   | 556282, | 2276.4591, |
| 5.700719 |         |            | 5.694838 |         |            | 5.688957 |         |            |
| 26321,   | 546950, | 2281.1036, | 26359,   | 550942, | 2278.7504, | 26397,   | 556562, | 2276.3971, |
| 5.700564 |         |            | 5.694683 |         |            | 5.688803 |         |            |
| 26322,   | 548082, | 2281.0417, | 26360,   | 551624, | 2278.6884, | 26398,   | 556760, | 2276.3352, |
| 5.700409 |         |            | 5.694529 |         |            | 5.688648 |         |            |
| 26323,   | 548854, | 2280.9797, | 26361,   | 552022, | 2278.6265, | 26399,   | 556404, | 2276.2733, |
| 5.700255 |         |            | 5.694374 |         |            | 5.688493 |         |            |
| 26324,   | 548762, | 2280.9178, | 26362,   | 552024, | 2278.5646, | 26400,   | 555612, | 2276.2114, |
| 5.700100 |         |            | 5.694219 |         |            | 5.688338 |         |            |
| 26325,   | 548232, | 2280.8559, | 26363,   | 552012, | 2278.5027, | 26401,   | 554964, | 2276.1494, |
| 5.699945 |         |            | 5.694064 |         |            | 5.688184 |         |            |
| 26326,   | 548048, | 2280.7940, | 26364,   | 552296, | 2278.4407, | 26402,   | 554846, | 2276.0875, |
| 5.699790 |         |            | 5.693910 |         |            | 5.688029 |         |            |
| 26327,   | 548458, | 2280.7320, | 26365,   | 552662, | 2278.3788, | 26403,   | 555032, | 2276.0256, |
| 5.699636 |         |            | 5.693755 |         |            | 5.687874 |         |            |
| 26328,   | 548954, | 2280.6701, | 26366,   | 552588, | 2278.3169, | 26404,   | 555028, | 2275.9637, |
| 5.699481 |         |            | 5.693600 |         |            | 5.687719 |         |            |
| 26329,   | 548894, | 2280.6082, | 26367,   | 551858, | 2278.2549, | 26405,   | 554770, | 2275.9017, |
| 5.699326 |         |            | 5.693445 |         |            | 5.687565 |         |            |
| 26330,   | 548234, | 2280.5462, | 26368,   | 550898, | 2278.1930, | 26406,   | 554758, | 2275.8398, |
| 5.699171 |         |            | 5.693291 |         |            | 5.687410 |         |            |
| 26331,   | 547508, | 2280.4843, | 26369,   | 550324, | 2278.1311, | 26407,   | 555450, | 2275.7779, |
| 5.699017 |         |            | 5.693136 |         |            | 5.687255 |         |            |
| 26332,   | 547238, | 2280.4224, | 26370,   | 550312, | 2278.0692, | 26408,   | 556556, | 2275.7159, |
| 5.698862 |         |            | 5.692981 |         |            | 5.687100 |         |            |
| 26333,   | 547438, | 2280.3605, | 26371,   | 550516, | 2278.0072, | 26409,   | 557222, | 2275.6540, |
| 5.698707 |         |            | 5.692826 |         |            | 5.686946 |         |            |
| 26334,   | 547804, | 2280.2985, | 26372,   | 550616, | 2277.9453, | 26410,   | 556904, | 2275.5921, |
| 5.698552 |         |            | 5.692672 |         |            | 5.686791 |         |            |
| 26335,   | 548146, | 2280.2366, | 26373,   | 550812, | 2277.8834, | 26411,   | 556022, | 2275.5302, |
| 5.698398 |         |            | 5.692517 |         |            | 5.686636 |         |            |
| 26336,   | 548536, | 2280.1747, | 26374,   | 551562, | 2277.8215, | 26412,   | 555584, | 2275.4682, |
| 5.698243 |         |            | 5.692362 |         |            | 5.686481 |         |            |
| 26337,   | 548970, | 2280.1128, | 26375,   | 552928, | 2277.7595, | 26413,   | 556182, | 2275.4063, |
| 5.698088 |         |            | 5.692207 |         |            | 5.686327 |         |            |
| 26338,   | 549148, | 2280.0508, | 26376,   | 554300, | 2277.6976, | 26414,   | 557410, | 2275.3444, |
| 5.697933 |         |            | 5.692053 |         |            | 5.686172 |         |            |
| 26339,   | 548742, | 2279.9889, | 26377,   | 554932, | 2277.6357, | 26415,   | 558390, | 2275.2825, |
| 5.697779 |         |            | 5.691898 |         |            | 5.686017 |         |            |
| 26340,   | 547926, | 2279.9270, | 26378,   | 554754, | 2277.5738, | 26416,   | 558666, | 2275.2205, |
| 5.697624 |         |            | 5.691743 |         |            | 5.685862 |         |            |
| 26341,   | 547426, | 2279.8650, | 26379,   | 554478, | 2277.5118, | 26417,   | 558532, | 2275.1586, |
| 5.697469 |         |            | 5.691588 |         |            | 5.685708 |         |            |
| 26342,   | 547894, | 2279.8031, | 26380,   | 554866, | 2277.4499, | 26418,   | 558478, | 2275.0967, |
| 5.697314 |         |            | 5.691434 |         |            | 5.685553 |         |            |

|          |         |            |          |         |            |          |         |            |
|----------|---------|------------|----------|---------|------------|----------|---------|------------|
| 26419,   | 558494, | 2275.0348, | 26457,   | 562396, | 2272.6815, | 26495,   | 566910, | 2270.3283, |
| 5.685398 |         |            | 5.679517 |         |            | 5.673636 |         |            |
| 26420,   | 558148, | 2274.9728, | 26458,   | 563250, | 2272.6196, | 26496,   | 567918, | 2270.2664, |
| 5.685243 |         |            | 5.679362 |         |            | 5.673482 |         |            |
| 26421,   | 557312, | 2274.9109, | 26459,   | 563650, | 2272.5577, | 26497,   | 568602, | 2270.2045, |
| 5.685088 |         |            | 5.679208 |         |            | 5.673327 |         |            |
| 26422,   | 556574, | 2274.8490, | 26460,   | 563558, | 2272.4957, | 26498,   | 568966, | 2270.1425, |
| 5.684934 |         |            | 5.679053 |         |            | 5.673172 |         |            |
| 26423,   | 556774, | 2274.7870, | 26461,   | 563418, | 2272.4338, | 26499,   | 569392, | 2270.0806, |
| 5.684779 |         |            | 5.678898 |         |            | 5.673017 |         |            |
| 26424,   | 558086, | 2274.7251, | 26462,   | 563522, | 2272.3719, | 26500,   | 570040, | 2270.0187, |
| 5.684624 |         |            | 5.678743 |         |            | 5.672863 |         |            |
| 26425,   | 559740, | 2274.6632, | 26463,   | 563720, | 2272.3100, | 26501,   | 570634, | 2269.9567, |
| 5.684469 |         |            | 5.678589 |         |            | 5.672708 |         |            |
| 26426,   | 560714, | 2274.6013, | 26464,   | 563706, | 2272.2480, | 26502,   | 570836, | 2269.8948, |
| 5.684315 |         |            | 5.678434 |         |            | 5.672553 |         |            |
| 26427,   | 560700, | 2274.5393, | 26465,   | 563568, | 2272.1861, | 26503,   | 570712, | 2269.8329, |
| 5.684160 |         |            | 5.678279 |         |            | 5.672398 |         |            |
| 26428,   | 560248, | 2274.4774, | 26466,   | 563724, | 2272.1242, | 26504,   | 570656, | 2269.7710, |
| 5.684005 |         |            | 5.678124 |         |            | 5.672244 |         |            |
| 26429,   | 560038, | 2274.4155, | 26467,   | 564376, | 2272.0623, | 26505,   | 570854, | 2269.7090, |
| 5.683850 |         |            | 5.677970 |         |            | 5.672089 |         |            |
| 26430,   | 560148, | 2274.3536, | 26468,   | 565154, | 2272.0003, | 26506,   | 570984, | 2269.6471, |
| 5.683696 |         |            | 5.677815 |         |            | 5.671934 |         |            |
| 26431,   | 560124, | 2274.2916, | 26469,   | 565468, | 2271.9384, | 26507,   | 570600, | 2269.5852, |
| 5.683541 |         |            | 5.677660 |         |            | 5.671779 |         |            |
| 26432,   | 559702, | 2274.2297, | 26470,   | 565208, | 2271.8765, | 26508,   | 569734, | 2269.5233, |
| 5.683386 |         |            | 5.677505 |         |            | 5.671625 |         |            |
| 26433,   | 559230, | 2274.1678, | 26471,   | 564942, | 2271.8146, | 26509,   | 569006, | 2269.4613, |
| 5.683231 |         |            | 5.677351 |         |            | 5.671470 |         |            |
| 26434,   | 559280, | 2274.1058, | 26472,   | 565292, | 2271.7526, | 26510,   | 569020, | 2269.3994, |
| 5.683077 |         |            | 5.677196 |         |            | 5.671315 |         |            |
| 26435,   | 559940, | 2274.0439, | 26473,   | 566184, | 2271.6907, | 26511,   | 569712, | 2269.3375, |
| 5.682922 |         |            | 5.677041 |         |            | 5.671160 |         |            |
| 26436,   | 560720, | 2273.9820, | 26474,   | 566852, | 2271.6288, | 26512,   | 570408, | 2269.2755, |
| 5.682767 |         |            | 5.676886 |         |            | 5.671006 |         |            |
| 26437,   | 561154, | 2273.9201, | 26475,   | 566652, | 2271.5668, | 26513,   | 570548, | 2269.2136, |
| 5.682612 |         |            | 5.676732 |         |            | 5.670851 |         |            |
| 26438,   | 561388, | 2273.8581, | 26476,   | 565748, | 2271.5049, | 26514,   | 570214, | 2269.1517, |
| 5.682458 |         |            | 5.676577 |         |            | 5.670696 |         |            |
| 26439,   | 561998, | 2273.7962, | 26477,   | 564958, | 2271.4430, | 26515,   | 569952, | 2269.0898, |
| 5.682303 |         |            | 5.676422 |         |            | 5.670541 |         |            |
| 26440,   | 563188, | 2273.7343, | 26478,   | 564870, | 2271.3811, | 26516,   | 570074, | 2269.0278, |
| 5.682148 |         |            | 5.676267 |         |            | 5.670387 |         |            |
| 26441,   | 564412, | 2273.6724, | 26479,   | 565310, | 2271.3191, | 26517,   | 570340, | 2268.9659, |
| 5.681993 |         |            | 5.676113 |         |            | 5.670232 |         |            |
| 26442,   | 564870, | 2273.6104, | 26480,   | 565662, | 2271.2572, | 26518,   | 570296, | 2268.9040, |
| 5.681839 |         |            | 5.675958 |         |            | 5.670077 |         |            |
| 26443,   | 564410, | 2273.5485, | 26481,   | 565644, | 2271.1953, | 26519,   | 569868, | 2268.8421, |
| 5.681684 |         |            | 5.675803 |         |            | 5.669922 |         |            |
| 26444,   | 563740, | 2273.4866, | 26482,   | 565572, | 2271.1334, | 26520,   | 569428, | 2268.7801, |
| 5.681529 |         |            | 5.675648 |         |            | 5.669767 |         |            |
| 26445,   | 563632, | 2273.4247, | 26483,   | 565870, | 2271.0714, | 26521,   | 569308, | 2268.7182, |
| 5.681374 |         |            | 5.675494 |         |            | 5.669613 |         |            |
| 26446,   | 564090, | 2273.3627, | 26484,   | 566434, | 2271.0095, | 26522,   | 569366, | 2268.6563, |
| 5.681220 |         |            | 5.675339 |         |            | 5.669458 |         |            |
| 26447,   | 564342, | 2273.3008, | 26485,   | 566720, | 2270.9476, | 26523,   | 569222, | 2268.5944, |
| 5.681065 |         |            | 5.675184 |         |            | 5.669303 |         |            |
| 26448,   | 563762, | 2273.2389, | 26486,   | 566416, | 2270.8856, | 26524,   | 568826, | 2268.5324, |
| 5.680910 |         |            | 5.675029 |         |            | 5.669148 |         |            |
| 26449,   | 562630, | 2273.1769, | 26487,   | 565914, | 2270.8237, | 26525,   | 568648, | 2268.4705, |
| 5.680755 |         |            | 5.674874 |         |            | 5.668994 |         |            |
| 26450,   | 561856, | 2273.1150, | 26488,   | 565916, | 2270.7618, | 26526,   | 569196, | 2268.4086, |
| 5.680601 |         |            | 5.674720 |         |            | 5.668839 |         |            |
| 26451,   | 561980, | 2273.0531, | 26489,   | 566618, | 2270.6999, | 26527,   | 570370, | 2268.3466, |
| 5.680446 |         |            | 5.674565 |         |            | 5.668684 |         |            |
| 26452,   | 562600, | 2272.9912, | 26490,   | 567428, | 2270.6379, | 26528,   | 571460, | 2268.2847, |
| 5.680291 |         |            | 5.674410 |         |            | 5.668529 |         |            |
| 26453,   | 562864, | 2272.9292, | 26491,   | 567560, | 2270.5760, | 26529,   | 571852, | 2268.2228, |
| 5.680136 |         |            | 5.674255 |         |            | 5.668375 |         |            |
| 26454,   | 562412, | 2272.8673, | 26492,   | 566908, | 2270.5141, | 26530,   | 571598, | 2268.1609, |
| 5.679981 |         |            | 5.674101 |         |            | 5.668220 |         |            |
| 26455,   | 561772, | 2272.8054, | 26493,   | 566170, | 2270.4522, | 26531,   | 571250, | 2268.0989, |
| 5.679827 |         |            | 5.673946 |         |            | 5.668065 |         |            |
| 26456,   | 561712, | 2272.7435, | 26494,   | 566132, | 2270.3902, | 26532,   | 571146, | 2268.0370, |
| 5.679672 |         |            | 5.673791 |         |            | 5.667910 |         |            |

|          |         |            |          |         |            |          |         |            |
|----------|---------|------------|----------|---------|------------|----------|---------|------------|
| 26533,   | 571034, | 2267.9751, | 26571,   | 576542, | 2265.6219, | 26609,   | 582270, | 2263.2686, |
| 5.667756 |         |            | 5.661875 |         |            | 5.655994 |         |            |
| 26534,   | 570460, | 2267.9132, | 26572,   | 576776, | 2265.5599, | 26610,   | 582026, | 2263.2067, |
| 5.667601 |         |            | 5.661720 |         |            | 5.655839 |         |            |
| 26535,   | 569516, | 2267.8512, | 26573,   | 576398, | 2265.4980, | 26611,   | 581330, | 2263.1448, |
| 5.667446 |         |            | 5.661565 |         |            | 5.655685 |         |            |
| 26536,   | 568938, | 2267.7893, | 26574,   | 576096, | 2265.4361, | 26612,   | 580888, | 2263.0829, |
| 5.667291 |         |            | 5.661411 |         |            | 5.655530 |         |            |
| 26537,   | 569406, | 2267.7274, | 26575,   | 576458, | 2265.3742, | 26613,   | 581376, | 2263.0209, |
| 5.667137 |         |            | 5.661256 |         |            | 5.655375 |         |            |
| 26538,   | 570806, | 2267.6654, | 26576,   | 577292, | 2265.3122, | 26614,   | 582644, | 2262.9590, |
| 5.666982 |         |            | 5.661101 |         |            | 5.655220 |         |            |
| 26539,   | 572260, | 2267.6035, | 26577,   | 577822, | 2265.2503, | 26615,   | 583764, | 2262.8971, |
| 5.666827 |         |            | 5.660946 |         |            | 5.655065 |         |            |
| 26540,   | 572950, | 2267.5416, | 26578,   | 577616, | 2265.1884, | 26616,   | 583934, | 2262.8352, |
| 5.666672 |         |            | 5.660792 |         |            | 5.654911 |         |            |
| 26541,   | 572792, | 2267.4797, | 26579,   | 577090, | 2265.1264, | 26617,   | 583232, | 2262.7732, |
| 5.666518 |         |            | 5.660637 |         |            | 5.654756 |         |            |
| 26542,   | 572346, | 2267.4177, | 26580,   | 577056, | 2265.0645, | 26618,   | 582462, | 2262.7113, |
| 5.666363 |         |            | 5.660482 |         |            | 5.654601 |         |            |
| 26543,   | 572092, | 2267.3558, | 26581,   | 577768, | 2265.0026, | 26619,   | 582314, | 2262.6494, |
| 5.666208 |         |            | 5.660327 |         |            | 5.654446 |         |            |
| 26544,   | 572028, | 2267.2939, | 26582,   | 578686, | 2264.9407, | 26620,   | 582806, | 2262.5874, |
| 5.666053 |         |            | 5.660172 |         |            | 5.654292 |         |            |
| 26545,   | 571936, | 2267.2320, | 26583,   | 579144, | 2264.8787, | 26621,   | 583510, | 2262.5255, |
| 5.665899 |         |            | 5.660018 |         |            | 5.654137 |         |            |
| 26546,   | 571904, | 2267.1700, | 26584,   | 579172, | 2264.8168, | 26622,   | 584152, | 2262.4636, |
| 5.665744 |         |            | 5.659863 |         |            | 5.653982 |         |            |
| 26547,   | 572312, | 2267.1081, | 26585,   | 579438, | 2264.7549, | 26623,   | 584824, | 2262.4017, |
| 5.665589 |         |            | 5.659708 |         |            | 5.653827 |         |            |
| 26548,   | 573312, | 2267.0462, | 26586,   | 580390, | 2264.6930, | 26624,   | 585638, | 2262.3397, |
| 5.665434 |         |            | 5.659553 |         |            | 5.653673 |         |            |
| 26549,   | 574462, | 2266.9843, | 26587,   | 581578, | 2264.6310, | 26625,   | 586396, | 2262.2778, |
| 5.665279 |         |            | 5.659399 |         |            | 5.653518 |         |            |
| 26550,   | 575096, | 2266.9223, | 26588,   | 582076, | 2264.5691, | 26626,   | 586776, | 2262.2159, |
| 5.665125 |         |            | 5.659244 |         |            | 5.653363 |         |            |
| 26551,   | 575046, | 2266.8604, | 26589,   | 581476, | 2264.5072, | 26627,   | 586756, | 2262.1540, |
| 5.664970 |         |            | 5.659089 |         |            | 5.653208 |         |            |
| 26552,   | 574884, | 2266.7985, | 26590,   | 580368, | 2264.4452, | 26628,   | 586736, | 2262.0920, |
| 5.664815 |         |            | 5.658934 |         |            | 5.653054 |         |            |
| 26553,   | 575320, | 2266.7365, | 26591,   | 579690, | 2264.3833, | 26629,   | 587036, | 2262.0301, |
| 5.664660 |         |            | 5.658780 |         |            | 5.652899 |         |            |
| 26554,   | 576384, | 2266.6746, | 26592,   | 579706, | 2264.3214, | 26630,   | 587420, | 2261.9682, |
| 5.664506 |         |            | 5.658625 |         |            | 5.652744 |         |            |
| 26555,   | 577362, | 2266.6127, | 26593,   | 579786, | 2264.2595, | 26631,   | 587268, | 2261.9062, |
| 5.664351 |         |            | 5.658470 |         |            | 5.652589 |         |            |
| 26556,   | 577536, | 2266.5508, | 26594,   | 579188, | 2264.1975, | 26632,   | 586286, | 2261.8443, |
| 5.664196 |         |            | 5.658315 |         |            | 5.652435 |         |            |
| 26557,   | 576916, | 2266.4888, | 26595,   | 578002, | 2264.1356, | 26633,   | 584956, | 2261.7824, |
| 5.664041 |         |            | 5.658161 |         |            | 5.652280 |         |            |
| 26558,   | 576154, | 2266.4269, | 26596,   | 577110, | 2264.0737, | 26634,   | 584136, | 2261.7205, |
| 5.663887 |         |            | 5.658006 |         |            | 5.652125 |         |            |
| 26559,   | 575754, | 2266.3650, | 26597,   | 577222, | 2264.0118, | 26635,   | 584202, | 2261.6585, |
| 5.663732 |         |            | 5.657851 |         |            | 5.651970 |         |            |
| 26560,   | 575554, | 2266.3031, | 26598,   | 578170, | 2263.9498, | 26636,   | 584656, | 2261.5966, |
| 5.663577 |         |            | 5.657696 |         |            | 5.651816 |         |            |
| 26561,   | 575060, | 2266.2411, | 26599,   | 579168, | 2263.8879, | 26637,   | 584700, | 2261.5347, |
| 5.663422 |         |            | 5.657542 |         |            | 5.651661 |         |            |
| 26562,   | 574204, | 2266.1792, | 26600,   | 579722, | 2263.8260, | 26638,   | 584094, | 2261.4728, |
| 5.663268 |         |            | 5.657387 |         |            | 5.651506 |         |            |
| 26563,   | 573518, | 2266.1173, | 26601,   | 580100, | 2263.7641, | 26639,   | 583376, | 2261.4108, |
| 5.663113 |         |            | 5.657232 |         |            | 5.651351 |         |            |
| 26564,   | 573572, | 2266.0553, | 26602,   | 580830, | 2263.7021, | 26640,   | 583204, | 2261.3489, |
| 5.662958 |         |            | 5.657077 |         |            | 5.651197 |         |            |
| 26565,   | 574274, | 2265.9934, | 26603,   | 581940, | 2263.6402, | 26641,   | 583640, | 2261.2870, |
| 5.662803 |         |            | 5.656923 |         |            | 5.651042 |         |            |
| 26566,   | 574930, | 2265.9315, | 26604,   | 582820, | 2263.5783, | 26642,   | 584128, | 2261.2251, |
| 5.662649 |         |            | 5.656768 |         |            | 5.650887 |         |            |
| 26567,   | 575036, | 2265.8696, | 26605,   | 582926, | 2263.5163, | 26643,   | 584166, | 2261.1631, |
| 5.662494 |         |            | 5.656613 |         |            | 5.650732 |         |            |
| 26568,   | 574834, | 2265.8076, | 26606,   | 582434, | 2263.4544, | 26644,   | 583820, | 2261.1012, |
| 5.662339 |         |            | 5.656458 |         |            | 5.650578 |         |            |
| 26569,   | 574982, | 2265.7457, | 26607,   | 582022, | 2263.3925, | 26645,   | 583504, | 2261.0393, |
| 5.662184 |         |            | 5.656304 |         |            | 5.650423 |         |            |
| 26570,   | 575720, | 2265.6838, | 26608,   | 582076, | 2263.3306, | 26646,   | 583396, | 2260.9773, |
| 5.662030 |         |            | 5.656149 |         |            | 5.650268 |         |            |

|          |         |            |          |         |            |          |         |            |
|----------|---------|------------|----------|---------|------------|----------|---------|------------|
| 26647,   | 583262, | 2260.9154, | 26685,   | 593716, | 2258.5622, | 26723,   | 595824, | 2256.2090, |
| 5.650113 |         |            | 5.644232 |         |            | 5.638352 |         |            |
| 26648,   | 582898, | 2260.8535, | 26686,   | 593816, | 2258.5003, | 26724,   | 596826, | 2256.1470, |
| 5.649958 |         |            | 5.644078 |         |            | 5.638197 |         |            |
| 26649,   | 582586, | 2260.7916, | 26687,   | 593550, | 2258.4383, | 26725,   | 597094, | 2256.0851, |
| 5.649804 |         |            | 5.643923 |         |            | 5.638042 |         |            |
| 26650,   | 582936, | 2260.7296, | 26688,   | 593436, | 2258.3764, | 26726,   | 597238, | 2256.0232, |
| 5.649649 |         |            | 5.643768 |         |            | 5.637887 |         |            |
| 26651,   | 584160, | 2260.6677, | 26689,   | 593738, | 2258.3145, | 26727,   | 597744, | 2255.9613, |
| 5.649494 |         |            | 5.643613 |         |            | 5.637733 |         |            |
| 26652,   | 585724, | 2260.6058, | 26690,   | 594132, | 2258.2526, | 26728,   | 598404, | 2255.8993, |
| 5.649339 |         |            | 5.643459 |         |            | 5.637578 |         |            |
| 26653,   | 586782, | 2260.5439, | 26691,   | 594104, | 2258.1906, | 26729,   | 598678, | 2255.8374, |
| 5.649185 |         |            | 5.643304 |         |            | 5.637423 |         |            |
| 26654,   | 587048, | 2260.4819, | 26692,   | 593626, | 2258.1287, | 26730,   | 598418, | 2255.7755, |
| 5.649030 |         |            | 5.643149 |         |            | 5.637268 |         |            |
| 26655,   | 587026, | 2260.4200, | 26693,   | 593286, | 2258.0668, | 26731,   | 598082, | 2255.7136, |
| 5.648875 |         |            | 5.642994 |         |            | 5.637114 |         |            |
| 26656,   | 587378, | 2260.3581, | 26694,   | 593614, | 2258.0049, | 26732,   | 598136, | 2255.6516, |
| 5.648720 |         |            | 5.642840 |         |            | 5.636959 |         |            |
| 26657,   | 588122, | 2260.2961, | 26695,   | 594406, | 2257.9429, | 26733,   | 598436, | 2255.5897, |
| 5.648566 |         |            | 5.642685 |         |            | 5.636804 |         |            |
| 26658,   | 588652, | 2260.2342, | 26696,   | 594832, | 2257.8810, | 26734,   | 598380, | 2255.5278, |
| 5.648411 |         |            | 5.642530 |         |            | 5.636649 |         |            |
| 26659,   | 588448, | 2260.1723, | 26697,   | 594310, | 2257.8191, | 26735,   | 597714, | 2255.4658, |
| 5.648256 |         |            | 5.642375 |         |            | 5.636495 |         |            |
| 26660,   | 587766, | 2260.1104, | 26698,   | 593088, | 2257.7571, | 26736,   | 596962, | 2255.4039, |
| 5.648101 |         |            | 5.642221 |         |            | 5.636340 |         |            |
| 26661,   | 587340, | 2260.0484, | 26699,   | 591988, | 2257.6952, | 26737,   | 596956, | 2255.3420, |
| 5.647947 |         |            | 5.642066 |         |            | 5.636185 |         |            |
| 26662,   | 587528, | 2259.9865, | 26700,   | 591554, | 2257.6333, | 26738,   | 597914, | 2255.2801, |
| 5.647792 |         |            | 5.641911 |         |            | 5.636030 |         |            |
| 26663,   | 587874, | 2259.9246, | 26701,   | 591584, | 2257.5714, | 26739,   | 599154, | 2255.2181, |
| 5.647637 |         |            | 5.641756 |         |            | 5.635876 |         |            |
| 26664,   | 587636, | 2259.8627, | 26702,   | 591534, | 2257.5094, | 26740,   | 599806, | 2255.1562, |
| 5.647482 |         |            | 5.641602 |         |            | 5.635721 |         |            |
| 26665,   | 586678, | 2259.8007, | 26703,   | 591222, | 2257.4475, | 26741,   | 599708, | 2255.0943, |
| 5.647328 |         |            | 5.641447 |         |            | 5.635566 |         |            |
| 26666,   | 585704, | 2259.7388, | 26704,   | 590986, | 2257.3856, | 26742,   | 599444, | 2255.0324, |
| 5.647173 |         |            | 5.641292 |         |            | 5.635411 |         |            |
| 26667,   | 585500, | 2259.6769, | 26705,   | 591166, | 2257.3237, | 26743,   | 599552, | 2254.9704, |
| 5.647018 |         |            | 5.641137 |         |            | 5.635257 |         |            |
| 26668,   | 586072, | 2259.6150, | 26706,   | 591642, | 2257.2617, | 26744,   | 599820, | 2254.9085, |
| 5.646863 |         |            | 5.640983 |         |            | 5.635102 |         |            |
| 26669,   | 586668, | 2259.5530, | 26707,   | 592014, | 2257.1998, | 26745,   | 599554, | 2254.8466, |
| 5.646709 |         |            | 5.640828 |         |            | 5.634947 |         |            |
| 26670,   | 586672, | 2259.4911, | 26708,   | 592196, | 2257.1379, | 26746,   | 598474, | 2254.7847, |
| 5.646554 |         |            | 5.640673 |         |            | 5.634792 |         |            |
| 26671,   | 586280, | 2259.4292, | 26709,   | 592630, | 2257.0759, | 26747,   | 597166, | 2254.7227, |
| 5.646399 |         |            | 5.640518 |         |            | 5.634637 |         |            |
| 26672,   | 586294, | 2259.3672, | 26710,   | 593742, | 2257.0140, | 26748,   | 596520, | 2254.6608, |
| 5.646244 |         |            | 5.640364 |         |            | 5.634483 |         |            |
| 26673,   | 587214, | 2259.3053, | 26711,   | 595268, | 2256.9521, | 26749,   | 596816, | 2254.5989, |
| 5.646090 |         |            | 5.640209 |         |            | 5.634328 |         |            |
| 26674,   | 588710, | 2259.2434, | 26712,   | 596344, | 2256.8902, | 26750,   | 597470, | 2254.5369, |
| 5.645935 |         |            | 5.640054 |         |            | 5.634173 |         |            |
| 26675,   | 590016, | 2259.1815, | 26713,   | 596332, | 2256.8282, | 26751,   | 597764, | 2254.4750, |
| 5.645780 |         |            | 5.639899 |         |            | 5.634018 |         |            |
| 26676,   | 590750, | 2259.1195, | 26714,   | 595500, | 2256.7663, | 26752,   | 597658, | 2254.4131, |
| 5.645625 |         |            | 5.639744 |         |            | 5.633864 |         |            |
| 26677,   | 591182, | 2259.0576, | 26715,   | 594738, | 2256.7044, | 26753,   | 597750, | 2254.3512, |
| 5.645471 |         |            | 5.639590 |         |            | 5.633709 |         |            |
| 26678,   | 591734, | 2258.9957, | 26716,   | 594590, | 2256.6425, | 26754,   | 598454, | 2254.2892, |
| 5.645316 |         |            | 5.639435 |         |            | 5.633554 |         |            |
| 26679,   | 592402, | 2258.9338, | 26717,   | 594710, | 2256.5805, | 26755,   | 599440, | 2254.2273, |
| 5.645161 |         |            | 5.639280 |         |            | 5.633399 |         |            |
| 26680,   | 592792, | 2258.8718, | 26718,   | 594358, | 2256.5186, | 26756,   | 599958, | 2254.1654, |
| 5.645006 |         |            | 5.639125 |         |            | 5.633245 |         |            |
| 26681,   | 592696, | 2258.8099, | 26719,   | 593396, | 2256.4567, | 26757,   | 599742, | 2254.1035, |
| 5.644851 |         |            | 5.638971 |         |            | 5.633090 |         |            |
| 26682,   | 592456, | 2258.7480, | 26720,   | 592580, | 2256.3948, | 26758,   | 599338, | 2254.0415, |
| 5.644697 |         |            | 5.638816 |         |            | 5.632935 |         |            |
| 26683,   | 592580, | 2258.6860, | 26721,   | 592818, | 2256.3328, | 26759,   | 599506, | 2253.9796, |
| 5.644542 |         |            | 5.638661 |         |            | 5.632780 |         |            |
| 26684,   | 593156, | 2258.6241, | 26722,   | 594186, | 2256.2709, | 26760,   | 600358, | 2253.9177, |
| 5.644387 |         |            | 5.638506 |         |            | 5.632626 |         |            |

|          |         |            |          |         |            |          |         |            |
|----------|---------|------------|----------|---------|------------|----------|---------|------------|
| 26761,   | 601248, | 2253.8557, | 26799,   | 606698, | 2251.5025, | 26837,   | 611680, | 2249.1493, |
| 5.632471 |         |            | 5.626590 |         |            | 5.620709 |         |            |
| 26762,   | 601536, | 2253.7938, | 26800,   | 606596, | 2251.4406, | 26838,   | 611646, | 2249.0874, |
| 5.632316 |         |            | 5.626435 |         |            | 5.620555 |         |            |
| 26763,   | 601286, | 2253.7319, | 26801,   | 606248, | 2251.3787, | 26839,   | 611480, | 2249.0255, |
| 5.632161 |         |            | 5.626281 |         |            | 5.620400 |         |            |
| 26764,   | 601114, | 2253.6700, | 26802,   | 606096, | 2251.3167, | 26840,   | 611588, | 2248.9635, |
| 5.632007 |         |            | 5.626126 |         |            | 5.620245 |         |            |
| 26765,   | 601424, | 2253.6080, | 26803,   | 606278, | 2251.2548, | 26841,   | 611886, | 2248.9016, |
| 5.631852 |         |            | 5.625971 |         |            | 5.620090 |         |            |
| 26766,   | 601906, | 2253.5461, | 26804,   | 606462, | 2251.1929, | 26842,   | 611868, | 2248.8397, |
| 5.631697 |         |            | 5.625816 |         |            | 5.619935 |         |            |
| 26767,   | 601954, | 2253.4842, | 26805,   | 606292, | 2251.1310, | 26843,   | 611266, | 2248.7777, |
| 5.631542 |         |            | 5.625662 |         |            | 5.619781 |         |            |
| 26768,   | 601436, | 2253.4223, | 26806,   | 605902, | 2251.0690, | 26844,   | 610470, | 2248.7158, |
| 5.631388 |         |            | 5.625507 |         |            | 5.619626 |         |            |
| 26769,   | 600868, | 2253.3603, | 26807,   | 605828, | 2251.0071, | 26845,   | 610212, | 2248.6539, |
| 5.631233 |         |            | 5.625352 |         |            | 5.619471 |         |            |
| 26770,   | 600818, | 2253.2984, | 26808,   | 606406, | 2250.9452, | 26846,   | 610730, | 2248.5920, |
| 5.631078 |         |            | 5.625197 |         |            | 5.619316 |         |            |
| 26771,   | 601264, | 2253.2365, | 26809,   | 607376, | 2250.8833, | 26847,   | 611538, | 2248.5300, |
| 5.630923 |         |            | 5.625043 |         |            | 5.619162 |         |            |
| 26772,   | 601692, | 2253.1746, | 26810,   | 608126, | 2250.8213, | 26848,   | 611944, | 2248.4681, |
| 5.630769 |         |            | 5.624888 |         |            | 5.619007 |         |            |
| 26773,   | 601820, | 2253.1126, | 26811,   | 608364, | 2250.7594, | 26849,   | 611838, | 2248.4062, |
| 5.630614 |         |            | 5.624733 |         |            | 5.618852 |         |            |
| 26774,   | 602012, | 2253.0507, | 26812,   | 608376, | 2250.6975, | 26850,   | 611738, | 2248.3443, |
| 5.630459 |         |            | 5.624578 |         |            | 5.618697 |         |            |
| 26775,   | 602832, | 2252.9888, | 26813,   | 608618, | 2250.6355, | 26851,   | 612094, | 2248.2823, |
| 5.630304 |         |            | 5.624423 |         |            | 5.618543 |         |            |
| 26776,   | 604240, | 2252.9268, | 26814,   | 609102, | 2250.5736, | 26852,   | 612676, | 2248.2204, |
| 5.630150 |         |            | 5.624269 |         |            | 5.618388 |         |            |
| 26777,   | 605422, | 2252.8649, | 26815,   | 609394, | 2250.5117, | 26853,   | 612812, | 2248.1585, |
| 5.629995 |         |            | 5.624114 |         |            | 5.618233 |         |            |
| 26778,   | 605552, | 2252.8030, | 26816,   | 609180, | 2250.4498, | 26854,   | 612214, | 2248.0965, |
| 5.629840 |         |            | 5.623959 |         |            | 5.618078 |         |            |
| 26779,   | 604664, | 2252.7411, | 26817,   | 608718, | 2250.3878, | 26855,   | 611398, | 2248.0346, |
| 5.629685 |         |            | 5.623804 |         |            | 5.617924 |         |            |
| 26780,   | 603690, | 2252.6791, | 26818,   | 608616, | 2250.3259, | 26856,   | 611166, | 2247.9727, |
| 5.629530 |         |            | 5.623650 |         |            | 5.617769 |         |            |
| 26781,   | 603512, | 2252.6172, | 26819,   | 609150, | 2250.2640, | 26857,   | 611740, | 2247.9108, |
| 5.629376 |         |            | 5.623495 |         |            | 5.617614 |         |            |
| 26782,   | 604150, | 2252.5553, | 26820,   | 609946, | 2250.2021, | 26858,   | 612490, | 2247.8488, |
| 5.629221 |         |            | 5.623340 |         |            | 5.617459 |         |            |
| 26783,   | 604866, | 2252.4934, | 26821,   | 610406, | 2250.1401, | 26859,   | 612670, | 2247.7869, |
| 5.629066 |         |            | 5.623185 |         |            | 5.617305 |         |            |
| 26784,   | 605058, | 2252.4314, | 26822,   | 610392, | 2250.0782, | 26860,   | 612226, | 2247.7250, |
| 5.628911 |         |            | 5.623031 |         |            | 5.617150 |         |            |
| 26785,   | 604914, | 2252.3695, | 26823,   | 610358, | 2250.0163, | 26861,   | 611804, | 2247.6631, |
| 5.628757 |         |            | 5.622876 |         |            | 5.616995 |         |            |
| 26786,   | 605086, | 2252.3076, | 26824,   | 610800, | 2249.9544, | 26862,   | 611952, | 2247.6011, |
| 5.628602 |         |            | 5.622721 |         |            | 5.616840 |         |            |
| 26787,   | 605896, | 2252.2456, | 26825,   | 611652, | 2249.8924, | 26863,   | 612482, | 2247.5392, |
| 5.628447 |         |            | 5.622566 |         |            | 5.616686 |         |            |
| 26788,   | 606952, | 2252.1837, | 26826,   | 612388, | 2249.8305, | 26864,   | 612738, | 2247.4773, |
| 5.628292 |         |            | 5.622412 |         |            | 5.616531 |         |            |
| 26789,   | 607598, | 2252.1218, | 26827,   | 612600, | 2249.7686, | 26865,   | 612456, | 2247.4154, |
| 5.628138 |         |            | 5.622257 |         |            | 5.616376 |         |            |
| 26790,   | 607602, | 2252.0599, | 26828,   | 612446, | 2249.7066, | 26866,   | 612102, | 2247.3534, |
| 5.627983 |         |            | 5.622102 |         |            | 5.616221 |         |            |
| 26791,   | 607298, | 2251.9979, | 26829,   | 612354, | 2249.6447, | 26867,   | 612346, | 2247.2915, |
| 5.627828 |         |            | 5.621947 |         |            | 5.616067 |         |            |
| 26792,   | 607092, | 2251.9360, | 26830,   | 612442, | 2249.5828, | 26868,   | 613256, | 2247.2296, |
| 5.627673 |         |            | 5.621793 |         |            | 5.615912 |         |            |
| 26793,   | 606988, | 2251.8741, | 26831,   | 612366, | 2249.5209, | 26869,   | 614230, | 2247.1676, |
| 5.627519 |         |            | 5.621638 |         |            | 5.615757 |         |            |
| 26794,   | 606724, | 2251.8122, | 26832,   | 611806, | 2249.4589, | 26870,   | 614722, | 2247.1057, |
| 5.627364 |         |            | 5.621483 |         |            | 5.615602 |         |            |
| 26795,   | 606240, | 2251.7502, | 26833,   | 610972, | 2249.3970, | 26871,   | 614898, | 2247.0438, |
| 5.627209 |         |            | 5.621328 |         |            | 5.615448 |         |            |
| 26796,   | 605864, | 2251.6883, | 26834,   | 610464, | 2249.3351, | 26872,   | 615368, | 2246.9819, |
| 5.627054 |         |            | 5.621174 |         |            | 5.615293 |         |            |
| 26797,   | 605938, | 2251.6264, | 26835,   | 610660, | 2249.2732, | 26873,   | 616352, | 2246.9199, |
| 5.626900 |         |            | 5.621019 |         |            | 5.615138 |         |            |
| 26798,   | 606374, | 2251.5645, | 26836,   | 611266, | 2249.2112, | 26874,   | 617272, | 2246.8580, |
| 5.626745 |         |            | 5.620864 |         |            | 5.614983 |         |            |

|          |         |            |          |         |            |          |         |            |
|----------|---------|------------|----------|---------|------------|----------|---------|------------|
| 26875,   | 617382, | 2246.7961, | 26913,   | 621024, | 2244.4429, | 26951,   | 626566, | 2242.0896, |
| 5.614828 |         |            | 5.608948 |         |            | 5.603067 |         |            |
| 26876,   | 616660, | 2246.7342, | 26914,   | 620596, | 2244.3809, | 26952,   | 626460, | 2242.0277, |
| 5.614674 |         |            | 5.608793 |         |            | 5.602912 |         |            |
| 26877,   | 615984, | 2246.6722, | 26915,   | 620274, | 2244.3190, | 26953,   | 626496, | 2241.9658, |
| 5.614519 |         |            | 5.608638 |         |            | 5.602757 |         |            |
| 26878,   | 616202, | 2246.6103, | 26916,   | 620518, | 2244.2571, | 26954,   | 627356, | 2241.9039, |
| 5.614364 |         |            | 5.608483 |         |            | 5.602603 |         |            |
| 26879,   | 617196, | 2246.5484, | 26917,   | 621248, | 2244.1952, | 26955,   | 628892, | 2241.8419, |
| 5.614209 |         |            | 5.608329 |         |            | 5.602448 |         |            |
| 26880,   | 617984, | 2246.4864, | 26918,   | 621846, | 2244.1332, | 26956,   | 630256, | 2241.7800, |
| 5.614055 |         |            | 5.608174 |         |            | 5.602293 |         |            |
| 26881,   | 617792, | 2246.4245, | 26919,   | 621862, | 2244.0713, | 26957,   | 630758, | 2241.7181, |
| 5.613900 |         |            | 5.608019 |         |            | 5.602138 |         |            |
| 26882,   | 616874, | 2246.3626, | 26920,   | 621488, | 2244.0094, | 26958,   | 630546, | 2241.6561, |
| 5.613745 |         |            | 5.607864 |         |            | 5.601984 |         |            |
| 26883,   | 616210, | 2246.3007, | 26921,   | 621310, | 2243.9474, | 26959,   | 630310, | 2241.5942, |
| 5.613590 |         |            | 5.607710 |         |            | 5.601829 |         |            |
| 26884,   | 616366, | 2246.2387, | 26922,   | 621606, | 2243.8855, | 26960,   | 630486, | 2241.5323, |
| 5.613436 |         |            | 5.607555 |         |            | 5.601674 |         |            |
| 26885,   | 616890, | 2246.1768, | 26923,   | 622054, | 2243.8236, | 26961,   | 630794, | 2241.4704, |
| 5.613281 |         |            | 5.607400 |         |            | 5.601519 |         |            |
| 26886,   | 616906, | 2246.1149, | 26924,   | 622166, | 2243.7617, | 26962,   | 630708, | 2241.4084, |
| 5.613126 |         |            | 5.607245 |         |            | 5.601365 |         |            |
| 26887,   | 616116, | 2246.0530, | 26925,   | 621910, | 2243.6997, | 26963,   | 630160, | 2241.3465, |
| 5.612971 |         |            | 5.607091 |         |            | 5.601210 |         |            |
| 26888,   | 615176, | 2245.9910, | 26926,   | 621728, | 2243.6378, | 26964,   | 629654, | 2241.2846, |
| 5.612817 |         |            | 5.606936 |         |            | 5.601055 |         |            |
| 26889,   | 614906, | 2245.9291, | 26927,   | 621974, | 2243.5759, | 26965,   | 629668, | 2241.2227, |
| 5.612662 |         |            | 5.606781 |         |            | 5.600900 |         |            |
| 26890,   | 615408, | 2245.8672, | 26928,   | 622402, | 2243.5140, | 26966,   | 630088, | 2241.1607, |
| 5.612507 |         |            | 5.606626 |         |            | 5.600746 |         |            |
| 26891,   | 616060, | 2245.8053, | 26929,   | 622480, | 2243.4520, | 26967,   | 630350, | 2241.0988, |
| 5.612352 |         |            | 5.606472 |         |            | 5.600591 |         |            |
| 26892,   | 616360, | 2245.7433, | 26930,   | 622066, | 2243.3901, | 26968,   | 630110, | 2241.0369, |
| 5.612198 |         |            | 5.606317 |         |            | 5.600436 |         |            |
| 26893,   | 616576, | 2245.6814, | 26931,   | 621670, | 2243.3282, | 26969,   | 629598, | 2240.9750, |
| 5.612043 |         |            | 5.606162 |         |            | 5.600281 |         |            |
| 26894,   | 617370, | 2245.6195, | 26932,   | 621898, | 2243.2662, | 26970,   | 629278, | 2240.9130, |
| 5.611888 |         |            | 5.606007 |         |            | 5.600127 |         |            |
| 26895,   | 618870, | 2245.5575, | 26933,   | 622736, | 2243.2043, | 26971,   | 629266, | 2240.8511, |
| 5.611733 |         |            | 5.605853 |         |            | 5.599972 |         |            |
| 26896,   | 620330, | 2245.4956, | 26934,   | 623526, | 2243.1424, | 26972,   | 629206, | 2240.7892, |
| 5.611579 |         |            | 5.605698 |         |            | 5.599817 |         |            |
| 26897,   | 620800, | 2245.4337, | 26935,   | 623684, | 2243.0805, | 26973,   | 628784, | 2240.7272, |
| 5.611424 |         |            | 5.605543 |         |            | 5.599662 |         |            |
| 26898,   | 620162, | 2245.3718, | 26936,   | 623394, | 2243.0185, | 26974,   | 628206, | 2240.6653, |
| 5.611269 |         |            | 5.605388 |         |            | 5.599507 |         |            |
| 26899,   | 619266, | 2245.3098, | 26937,   | 623374, | 2242.9566, | 26975,   | 628002, | 2240.6034, |
| 5.611114 |         |            | 5.605234 |         |            | 5.599353 |         |            |
| 26900,   | 619090, | 2245.2479, | 26938,   | 624012, | 2242.8947, | 26976,   | 628436, | 2240.5415, |
| 5.610960 |         |            | 5.605079 |         |            | 5.599198 |         |            |
| 26901,   | 619802, | 2245.1860, | 26939,   | 624878, | 2242.8328, | 26977,   | 629208, | 2240.4795, |
| 5.610805 |         |            | 5.604924 |         |            | 5.599043 |         |            |
| 26902,   | 620750, | 2245.1241, | 26940,   | 625170, | 2242.7708, | 26978,   | 629854, | 2240.4176, |
| 5.610650 |         |            | 5.604769 |         |            | 5.598888 |         |            |
| 26903,   | 621290, | 2245.0621, | 26941,   | 624628, | 2242.7089, | 26979,   | 630338, | 2240.3557, |
| 5.610495 |         |            | 5.604614 |         |            | 5.598734 |         |            |
| 26904,   | 621434, | 2245.0002, | 26942,   | 623828, | 2242.6470, | 26980,   | 631072, | 2240.2938, |
| 5.610341 |         |            | 5.604460 |         |            | 5.598579 |         |            |
| 26905,   | 621674, | 2244.9383, | 26943,   | 623542, | 2242.5851, | 26981,   | 632304, | 2240.2318, |
| 5.610186 |         |            | 5.604305 |         |            | 5.598424 |         |            |
| 26906,   | 622216, | 2244.8763, | 26944,   | 623904, | 2242.5231, | 26982,   | 633622, | 2240.1699, |
| 5.610031 |         |            | 5.604150 |         |            | 5.598269 |         |            |
| 26907,   | 622684, | 2244.8144, | 26945,   | 624358, | 2242.4612, | 26983,   | 634244, | 2240.1080, |
| 5.609876 |         |            | 5.603995 |         |            | 5.598115 |         |            |
| 26908,   | 622586, | 2244.7525, | 26946,   | 624398, | 2242.3993, | 26984,   | 633840, | 2240.0460, |
| 5.609721 |         |            | 5.603841 |         |            | 5.597960 |         |            |
| 26909,   | 621948, | 2244.6906, | 26947,   | 624198, | 2242.3373, | 26985,   | 632954, | 2239.9841, |
| 5.609567 |         |            | 5.603686 |         |            | 5.597805 |         |            |
| 26910,   | 621304, | 2244.6286, | 26948,   | 624366, | 2242.2754, | 26986,   | 632482, | 2239.9222, |
| 5.609412 |         |            | 5.603531 |         |            | 5.597650 |         |            |
| 26911,   | 621082, | 2244.5667, | 26949,   | 625164, | 2242.2135, | 26987,   | 632776, | 2239.8603, |
| 5.609257 |         |            | 5.603376 |         |            | 5.597496 |         |            |
| 26912,   | 621142, | 2244.5048, | 26950,   | 626120, | 2242.1516, | 26988,   | 633318, | 2239.7983, |
| 5.609102 |         |            | 5.603222 |         |            | 5.597341 |         |            |



|          |         |            |          |         |            |          |         |            |
|----------|---------|------------|----------|---------|------------|----------|---------|------------|
| 26989,   | 633350, | 2239.7364, | 27027,   | 637566, | 2237.3832, | 27065,   | 645488, | 2235.0300, |
| 5.597186 |         |            | 5.591305 |         |            | 5.585425 |         |            |
| 26990,   | 632726, | 2239.6745, | 27028,   | 637290, | 2237.3213, | 27066,   | 645470, | 2234.9680, |
| 5.597031 |         |            | 5.591151 |         |            | 5.585270 |         |            |
| 26991,   | 632040, | 2239.6126, | 27029,   | 637162, | 2237.2593, | 27067,   | 645638, | 2234.9061, |
| 5.596877 |         |            | 5.590996 |         |            | 5.585115 |         |            |
| 26992,   | 631950, | 2239.5506, | 27030,   | 637464, | 2237.1974, | 27068,   | 646298, | 2234.8442, |
| 5.596722 |         |            | 5.590841 |         |            | 5.584960 |         |            |
| 26993,   | 632494, | 2239.4887, | 27031,   | 637840, | 2237.1355, | 27069,   | 646964, | 2234.7823, |
| 5.596567 |         |            | 5.590686 |         |            | 5.584806 |         |            |
| 26994,   | 633170, | 2239.4268, | 27032,   | 637766, | 2237.0736, | 27070,   | 646916, | 2234.7203, |
| 5.596412 |         |            | 5.590532 |         |            | 5.584651 |         |            |
| 26995,   | 633566, | 2239.3649, | 27033,   | 637216, | 2237.0116, | 27071,   | 646096, | 2234.6584, |
| 5.596258 |         |            | 5.590377 |         |            | 5.584496 |         |            |
| 26996,   | 633778, | 2239.3029, | 27034,   | 636760, | 2236.9497, | 27072,   | 645202, | 2234.5965, |
| 5.596103 |         |            | 5.590222 |         |            | 5.584341 |         |            |
| 26997,   | 634118, | 2239.2410, | 27035,   | 636902, | 2236.8878, | 27073,   | 644928, | 2234.5346, |
| 5.595948 |         |            | 5.590067 |         |            | 5.584186 |         |            |
| 26998,   | 634548, | 2239.1791, | 27036,   | 637480, | 2236.8259, | 27074,   | 645196, | 2234.4726, |
| 5.595793 |         |            | 5.589913 |         |            | 5.584032 |         |            |
| 26999,   | 634626, | 2239.1171, | 27037,   | 637832, | 2236.7639, | 27075,   | 645324, | 2234.4107, |
| 5.595639 |         |            | 5.589758 |         |            | 5.583877 |         |            |
| 27000,   | 634030, | 2239.0552, | 27038,   | 637598, | 2236.7020, | 27076,   | 644908, | 2234.3488, |
| 5.595484 |         |            | 5.589603 |         |            | 5.583722 |         |            |
| 27001,   | 633034, | 2238.9933, | 27039,   | 637166, | 2236.6401, | 27077,   | 644334, | 2234.2868, |
| 5.595329 |         |            | 5.589448 |         |            | 5.583567 |         |            |
| 27002,   | 632326, | 2238.9314, | 27040,   | 637242, | 2236.5781, | 27078,   | 644282, | 2234.2249, |
| 5.595174 |         |            | 5.589293 |         |            | 5.583413 |         |            |
| 27003,   | 632362, | 2238.8694, | 27041,   | 638036, | 2236.5162, | 27079,   | 644856, | 2234.1630, |
| 5.595020 |         |            | 5.589139 |         |            | 5.583258 |         |            |
| 27004,   | 632948, | 2238.8075, | 27042,   | 639046, | 2236.4543, | 27080,   | 645388, | 2234.1011, |
| 5.594865 |         |            | 5.588984 |         |            | 5.583103 |         |            |
| 27005,   | 633622, | 2238.7456, | 27043,   | 639636, | 2236.3924, | 27081,   | 645218, | 2234.0391, |
| 5.594710 |         |            | 5.588829 |         |            | 5.582948 |         |            |
| 27006,   | 634204, | 2238.6837, | 27044,   | 639800, | 2236.3304, | 27082,   | 644516, | 2233.9772, |
| 5.594555 |         |            | 5.588674 |         |            | 5.582794 |         |            |
| 27007,   | 634936, | 2238.6217, | 27045,   | 640080, | 2236.2685, | 27083,   | 644166, | 2233.9153, |
| 5.594400 |         |            | 5.588520 |         |            | 5.582639 |         |            |
| 27008,   | 635988, | 2238.5598, | 27046,   | 640872, | 2236.2066, | 27084,   | 644772, | 2233.8534, |
| 5.594246 |         |            | 5.588365 |         |            | 5.582484 |         |            |
| 27009,   | 637000, | 2238.4979, | 27047,   | 641866, | 2236.1447, | 27085,   | 645942, | 2233.7914, |
| 5.594091 |         |            | 5.588210 |         |            | 5.582329 |         |            |
| 27010,   | 637340, | 2238.4359, | 27048,   | 642418, | 2236.0827, | 27086,   | 646720, | 2233.7295, |
| 5.593936 |         |            | 5.588055 |         |            | 5.582175 |         |            |
| 27011,   | 636798, | 2238.3740, | 27049,   | 642348, | 2236.0208, | 27087,   | 646612, | 2233.6676, |
| 5.593781 |         |            | 5.587901 |         |            | 5.582020 |         |            |
| 27012,   | 635906, | 2238.3121, | 27050,   | 642202, | 2235.9589, | 27088,   | 646146, | 2233.6057, |
| 5.593627 |         |            | 5.587746 |         |            | 5.581865 |         |            |
| 27013,   | 635446, | 2238.2502, | 27051,   | 642640, | 2235.8969, | 27089,   | 646210, | 2233.5437, |
| 5.593472 |         |            | 5.587591 |         |            | 5.581710 |         |            |
| 27014,   | 635668, | 2238.1882, | 27052,   | 643626, | 2235.8350, | 27090,   | 647042, | 2233.4818, |
| 5.593317 |         |            | 5.587436 |         |            | 5.581556 |         |            |
| 27015,   | 636066, | 2238.1263, | 27053,   | 644438, | 2235.7731, | 27091,   | 647978, | 2233.4199, |
| 5.593162 |         |            | 5.587282 |         |            | 5.581401 |         |            |
| 27016,   | 636014, | 2238.0644, | 27054,   | 644508, | 2235.7112, | 27092,   | 648244, | 2233.3579, |
| 5.593008 |         |            | 5.587127 |         |            | 5.581246 |         |            |
| 27017,   | 635486, | 2238.0025, | 27055,   | 644090, | 2235.6492, | 27093,   | 647826, | 2233.2960, |
| 5.592853 |         |            | 5.586972 |         |            | 5.581091 |         |            |
| 27018,   | 635040, | 2237.9405, | 27056,   | 643962, | 2235.5873, | 27094,   | 647438, | 2233.2341, |
| 5.592698 |         |            | 5.586817 |         |            | 5.580937 |         |            |
| 27019,   | 635148, | 2237.8786, | 27057,   | 644492, | 2235.5254, | 27095,   | 647682, | 2233.1722, |
| 5.592543 |         |            | 5.586663 |         |            | 5.580782 |         |            |
| 27020,   | 635646, | 2237.8167, | 27058,   | 645146, | 2235.4635, | 27096,   | 648412, | 2233.1102, |
| 5.592389 |         |            | 5.586508 |         |            | 5.580627 |         |            |
| 27021,   | 635954, | 2237.7548, | 27059,   | 645098, | 2235.4015, | 27097,   | 649056, | 2233.0483, |
| 5.592234 |         |            | 5.586353 |         |            | 5.580472 |         |            |
| 27022,   | 635836, | 2237.6928, | 27060,   | 644204, | 2235.3396, | 27098,   | 649376, | 2232.9864, |
| 5.592079 |         |            | 5.586198 |         |            | 5.580318 |         |            |
| 27023,   | 635652, | 2237.6309, | 27061,   | 643256, | 2235.2777, | 27099,   | 649762, | 2232.9245, |
| 5.591924 |         |            | 5.586044 |         |            | 5.580163 |         |            |
| 27024,   | 635944, | 2237.5690, | 27062,   | 643174, | 2235.2158, | 27100,   | 650632, | 2232.8625, |
| 5.591770 |         |            | 5.585889 |         |            | 5.580008 |         |            |
| 27025,   | 636720, | 2237.5070, | 27063,   | 644026, | 2235.1538, | 27101,   | 651762, | 2232.8006, |
| 5.591615 |         |            | 5.585734 |         |            | 5.579853 |         |            |
| 27026,   | 637422, | 2237.4451, | 27064,   | 645038, | 2235.0919, | 27102,   | 652386, | 2232.7387, |
| 5.591460 |         |            | 5.585579 |         |            | 5.579699 |         |            |

|          |         |            |          |         |            |          |         |            |
|----------|---------|------------|----------|---------|------------|----------|---------|------------|
| 27103,   | 652032, | 2232.6767, | 27141,   | 655130, | 2230.3235, | 27179,   | 660506, | 2227.9703, |
| 5.579544 |         |            | 5.573663 |         |            | 5.567782 |         |            |
| 27104,   | 651120, | 2232.6148, | 27142,   | 654820, | 2230.2616, | 27180,   | 660292, | 2227.9084, |
| 5.579389 |         |            | 5.573508 |         |            | 5.567627 |         |            |
| 27105,   | 650530, | 2232.5529, | 27143,   | 655008, | 2230.1997, | 27181,   | 660190, | 2227.8464, |
| 5.579234 |         |            | 5.573353 |         |            | 5.567473 |         |            |
| 27106,   | 650676, | 2232.4910, | 27144,   | 655620, | 2230.1377, | 27182,   | 660362, | 2227.7845, |
| 5.579079 |         |            | 5.573199 |         |            | 5.567318 |         |            |
| 27107,   | 651112, | 2232.4290, | 27145,   | 655998, | 2230.0758, | 27183,   | 660388, | 2227.7226, |
| 5.578925 |         |            | 5.573044 |         |            | 5.567163 |         |            |
| 27108,   | 651094, | 2232.3671, | 27146,   | 655614, | 2230.0139, | 27184,   | 659898, | 2227.6607, |
| 5.578770 |         |            | 5.572889 |         |            | 5.567008 |         |            |
| 27109,   | 650506, | 2232.3052, | 27147,   | 654776, | 2229.9520, | 27185,   | 659172, | 2227.5987, |
| 5.578615 |         |            | 5.572734 |         |            | 5.566854 |         |            |
| 27110,   | 649958, | 2232.2433, | 27148,   | 654380, | 2229.8900, | 27186,   | 658958, | 2227.5368, |
| 5.578460 |         |            | 5.572580 |         |            | 5.566699 |         |            |
| 27111,   | 650066, | 2232.1813, | 27149,   | 654952, | 2229.8281, | 27187,   | 659636, | 2227.4749, |
| 5.578306 |         |            | 5.572425 |         |            | 5.566544 |         |            |
| 27112,   | 650742, | 2232.1194, | 27150,   | 656066, | 2229.7662, | 27188,   | 660752, | 2227.4130, |
| 5.578151 |         |            | 5.572270 |         |            | 5.566389 |         |            |
| 27113,   | 651328, | 2232.0575, | 27151,   | 656764, | 2229.7043, | 27189,   | 661472, | 2227.3510, |
| 5.577996 |         |            | 5.572115 |         |            | 5.566235 |         |            |
| 27114,   | 651400, | 2231.9956, | 27152,   | 656586, | 2229.6423, | 27190,   | 661472, | 2227.2891, |
| 5.577841 |         |            | 5.571961 |         |            | 5.566080 |         |            |
| 27115,   | 651210, | 2231.9336, | 27153,   | 655982, | 2229.5804, | 27191,   | 661220, | 2227.2272, |
| 5.577687 |         |            | 5.571806 |         |            | 5.565925 |         |            |
| 27116,   | 651250, | 2231.8717, | 27154,   | 655728, | 2229.5185, | 27192,   | 661350, | 2227.1653, |
| 5.577532 |         |            | 5.571651 |         |            | 5.565770 |         |            |
| 27117,   | 651514, | 2231.8098, | 27155,   | 656008, | 2229.4565, | 27193,   | 661890, | 2227.1033, |
| 5.577377 |         |            | 5.571496 |         |            | 5.565616 |         |            |
| 27118,   | 651430, | 2231.7478, | 27156,   | 656284, | 2229.3946, | 27194,   | 662316, | 2227.0414, |
| 5.577222 |         |            | 5.571342 |         |            | 5.565461 |         |            |
| 27119,   | 650582, | 2231.6859, | 27157,   | 656026, | 2229.3327, | 27195,   | 662272, | 2226.9795, |
| 5.577068 |         |            | 5.571187 |         |            | 5.565306 |         |            |
| 27120,   | 649360, | 2231.6240, | 27158,   | 655404, | 2229.2708, | 27196,   | 662122, | 2226.9175, |
| 5.576913 |         |            | 5.571032 |         |            | 5.565151 |         |            |
| 27121,   | 648690, | 2231.5621, | 27159,   | 655120, | 2229.2088, | 27197,   | 662534, | 2226.8556, |
| 5.576758 |         |            | 5.570877 |         |            | 5.564997 |         |            |
| 27122,   | 649028, | 2231.5001, | 27160,   | 655546, | 2229.1469, | 27198,   | 663626, | 2226.7937, |
| 5.576603 |         |            | 5.570723 |         |            | 5.564842 |         |            |
| 27123,   | 649822, | 2231.4382, | 27161,   | 656296, | 2229.0850, | 27199,   | 664690, | 2226.7318, |
| 5.576449 |         |            | 5.570568 |         |            | 5.564687 |         |            |
| 27124,   | 650054, | 2231.3763, | 27162,   | 656678, | 2229.0231, | 27200,   | 664902, | 2226.6698, |
| 5.576294 |         |            | 5.570413 |         |            | 5.564532 |         |            |
| 27125,   | 649344, | 2231.3144, | 27163,   | 656522, | 2228.9611, | 27201,   | 664212, | 2226.6079, |
| 5.576139 |         |            | 5.570258 |         |            | 5.564377 |         |            |
| 27126,   | 648374, | 2231.2524, | 27164,   | 656330, | 2228.8992, | 27202,   | 663408, | 2226.5460, |
| 5.575984 |         |            | 5.570104 |         |            | 5.564223 |         |            |
| 27127,   | 648124, | 2231.1905, | 27165,   | 656592, | 2228.8373, | 27203,   | 663270, | 2226.4841, |
| 5.575830 |         |            | 5.569949 |         |            | 5.564068 |         |            |
| 27128,   | 648852, | 2231.1286, | 27166,   | 657084, | 2228.7754, | 27204,   | 663770, | 2226.4221, |
| 5.575675 |         |            | 5.569794 |         |            | 5.563913 |         |            |
| 27129,   | 649886, | 2231.0666, | 27167,   | 657082, | 2228.7134, | 27205,   | 664222, | 2226.3602, |
| 5.575520 |         |            | 5.569639 |         |            | 5.563758 |         |            |
| 27130,   | 650460, | 2231.0047, | 27168,   | 656252, | 2228.6515, | 27206,   | 664162, | 2226.2983, |
| 5.575365 |         |            | 5.569484 |         |            | 5.563604 |         |            |
| 27131,   | 650536, | 2230.9428, | 27169,   | 655180, | 2228.5896, | 27207,   | 663894, | 2226.2363, |
| 5.575211 |         |            | 5.569330 |         |            | 5.563449 |         |            |
| 27132,   | 650786, | 2230.8809, | 27170,   | 654850, | 2228.5276, | 27208,   | 664032, | 2226.1744, |
| 5.575056 |         |            | 5.569175 |         |            | 5.563294 |         |            |
| 27133,   | 651706, | 2230.8189, | 27171,   | 655608, | 2228.4657, | 27209,   | 664670, | 2226.1125, |
| 5.574901 |         |            | 5.569020 |         |            | 5.563139 |         |            |
| 27134,   | 653052, | 2230.7570, | 27172,   | 656820, | 2228.4038, | 27210,   | 665212, | 2226.0506, |
| 5.574746 |         |            | 5.568865 |         |            | 5.562985 |         |            |
| 27135,   | 654138, | 2230.6951, | 27173,   | 657568, | 2228.3419, | 27211,   | 665058, | 2225.9886, |
| 5.574591 |         |            | 5.568711 |         |            | 5.562830 |         |            |
| 27136,   | 654608, | 2230.6332, | 27174,   | 657618, | 2228.2799, | 27212,   | 664400, | 2225.9267, |
| 5.574437 |         |            | 5.568556 |         |            | 5.562675 |         |            |
| 27137,   | 654750, | 2230.5712, | 27175,   | 657608, | 2228.2180, | 27213,   | 664046, | 2225.8648, |
| 5.574282 |         |            | 5.568401 |         |            | 5.562520 |         |            |
| 27138,   | 654994, | 2230.5093, | 27176,   | 658204, | 2228.1561, | 27214,   | 664556, | 2225.8029, |
| 5.574127 |         |            | 5.568246 |         |            | 5.562366 |         |            |
| 27139,   | 655344, | 2230.4474, | 27177,   | 659320, | 2228.0942, | 27215,   | 665588, | 2225.7409, |
| 5.573972 |         |            | 5.568092 |         |            | 5.562211 |         |            |
| 27140,   | 655436, | 2230.3855, | 27178,   | 660254, | 2228.0322, | 27216,   | 666306, | 2225.6790, |
| 5.573818 |         |            | 5.567937 |         |            | 5.562056 |         |            |

|          |         |            |          |         |            |          |         |            |
|----------|---------|------------|----------|---------|------------|----------|---------|------------|
| 27217,   | 666372, | 2225.6171, | 27255,   | 676108, | 2223.2639, | 27293,   | 684450, | 2220.9106, |
| 5.561901 |         |            | 5.556021 |         |            | 5.550140 |         |            |
| 27218,   | 666328, | 2225.5552, | 27256,   | 675820, | 2223.2019, | 27294,   | 683682, | 2220.8487, |
| 5.561747 |         |            | 5.555866 |         |            | 5.549985 |         |            |
| 27219,   | 666990, | 2225.4932, | 27257,   | 676382, | 2223.1400, | 27295,   | 683032, | 2220.7868, |
| 5.561592 |         |            | 5.555711 |         |            | 5.549830 |         |            |
| 27220,   | 668504, | 2225.4313, | 27258,   | 677518, | 2223.0781, | 27296,   | 682828, | 2220.7249, |
| 5.561437 |         |            | 5.555556 |         |            | 5.549676 |         |            |
| 27221,   | 670180, | 2225.3694, | 27259,   | 678306, | 2223.0162, | 27297,   | 682844, | 2220.6629, |
| 5.561282 |         |            | 5.555402 |         |            | 5.549521 |         |            |
| 27222,   | 671240, | 2225.3074, | 27260,   | 678242, | 2222.9542, | 27298,   | 682666, | 2220.6010, |
| 5.561128 |         |            | 5.555247 |         |            | 5.549366 |         |            |
| 27223,   | 671582, | 2225.2455, | 27261,   | 677788, | 2222.8923, | 27299,   | 682214, | 2220.5391, |
| 5.560973 |         |            | 5.555092 |         |            | 5.549211 |         |            |
| 27224,   | 671714, | 2225.1836, | 27262,   | 677774, | 2222.8304, | 27300,   | 681722, | 2220.4771, |
| 5.560818 |         |            | 5.554937 |         |            | 5.549056 |         |            |
| 27225,   | 671988, | 2225.1217, | 27263,   | 678368, | 2222.7684, | 27301,   | 681346, | 2220.4152, |
| 5.560663 |         |            | 5.554783 |         |            | 5.548902 |         |            |
| 27226,   | 672180, | 2225.0597, | 27264,   | 678860, | 2222.7065, | 27302,   | 681010, | 2220.3533, |
| 5.560509 |         |            | 5.554628 |         |            | 5.548747 |         |            |
| 27227,   | 671856, | 2224.9978, | 27265,   | 678582, | 2222.6446, | 27303,   | 680658, | 2220.2914, |
| 5.560354 |         |            | 5.554473 |         |            | 5.548592 |         |            |
| 27228,   | 671088, | 2224.9359, | 27266,   | 677842, | 2222.5827, | 27304,   | 680594, | 2220.2294, |
| 5.560199 |         |            | 5.554318 |         |            | 5.548437 |         |            |
| 27229,   | 670520, | 2224.8740, | 27267,   | 677706, | 2222.5207, | 27305,   | 681242, | 2220.1675, |
| 5.560044 |         |            | 5.554163 |         |            | 5.548283 |         |            |
| 27230,   | 670674, | 2224.8120, | 27268,   | 678764, | 2222.4588, | 27306,   | 682570, | 2220.1056, |
| 5.559890 |         |            | 5.554009 |         |            | 5.548128 |         |            |
| 27231,   | 671294, | 2224.7501, | 27269,   | 680310, | 2222.3969, | 27307,   | 683912, | 2220.0437, |
| 5.559735 |         |            | 5.553854 |         |            | 5.547973 |         |            |
| 27232,   | 671592, | 2224.6882, | 27270,   | 680928, | 2222.3350, | 27308,   | 684522, | 2219.9817, |
| 5.559580 |         |            | 5.553699 |         |            | 5.547818 |         |            |
| 27233,   | 671112, | 2224.6262, | 27271,   | 679968, | 2222.2730, | 27309,   | 684358, | 2219.9198, |
| 5.559425 |         |            | 5.553544 |         |            | 5.547664 |         |            |
| 27234,   | 670284, | 2224.5643, | 27272,   | 678256, | 2222.2111, | 27310,   | 684154, | 2219.8579, |
| 5.559270 |         |            | 5.553390 |         |            | 5.547509 |         |            |
| 27235,   | 669972, | 2224.5024, | 27273,   | 677242, | 2222.1492, | 27311,   | 684612, | 2219.7960, |
| 5.559116 |         |            | 5.553235 |         |            | 5.547354 |         |            |
| 27236,   | 670544, | 2224.4405, | 27274,   | 677522, | 2222.0872, | 27312,   | 685572, | 2219.7340, |
| 5.558961 |         |            | 5.553080 |         |            | 5.547199 |         |            |
| 27237,   | 671526, | 2224.3785, | 27275,   | 678326, | 2222.0253, | 27313,   | 686154, | 2219.6721, |
| 5.558806 |         |            | 5.552925 |         |            | 5.547045 |         |            |
| 27238,   | 672166, | 2224.3166, | 27276,   | 678526, | 2221.9634, | 27314,   | 685712, | 2219.6102, |
| 5.558651 |         |            | 5.552771 |         |            | 5.546890 |         |            |
| 27239,   | 672264, | 2224.2547, | 27277,   | 677928, | 2221.9015, | 27315,   | 684608, | 2219.5482, |
| 5.558497 |         |            | 5.552616 |         |            | 5.546735 |         |            |
| 27240,   | 672228, | 2224.1928, | 27278,   | 677418, | 2221.8395, | 27316,   | 683822, | 2219.4863, |
| 5.558342 |         |            | 5.552461 |         |            | 5.546580 |         |            |
| 27241,   | 672482, | 2224.1308, | 27279,   | 677834, | 2221.7776, | 27317,   | 683922, | 2219.4244, |
| 5.558187 |         |            | 5.552306 |         |            | 5.546426 |         |            |
| 27242,   | 672910, | 2224.0689, | 27280,   | 678948, | 2221.7157, | 27318,   | 684472, | 2219.3625, |
| 5.558032 |         |            | 5.552152 |         |            | 5.546271 |         |            |
| 27243,   | 673124, | 2224.0070, | 27281,   | 679692, | 2221.6538, | 27319,   | 684604, | 2219.3005, |
| 5.557878 |         |            | 5.551997 |         |            | 5.546116 |         |            |
| 27244,   | 673076, | 2223.9451, | 27282,   | 679408, | 2221.5918, | 27320,   | 684060, | 2219.2386, |
| 5.557723 |         |            | 5.551842 |         |            | 5.545961 |         |            |
| 27245,   | 673228, | 2223.8831, | 27283,   | 678630, | 2221.5299, | 27321,   | 683526, | 2219.1767, |
| 5.557568 |         |            | 5.551687 |         |            | 5.545807 |         |            |
| 27246,   | 673988, | 2223.8212, | 27284,   | 678514, | 2221.4680, | 27322,   | 683886, | 2219.1148, |
| 5.557413 |         |            | 5.551533 |         |            | 5.545652 |         |            |
| 27247,   | 675102, | 2223.7593, | 27285,   | 679598, | 2221.4061, | 27323,   | 685264, | 2219.0528, |
| 5.557259 |         |            | 5.551378 |         |            | 5.545497 |         |            |
| 27248,   | 675806, | 2223.6973, | 27286,   | 681266, | 2221.3441, | 27324,   | 686892, | 2218.9909, |
| 5.557104 |         |            | 5.551223 |         |            | 5.545342 |         |            |
| 27249,   | 675690, | 2223.6354, | 27287,   | 682460, | 2221.2822, | 27325,   | 687940, | 2218.9290, |
| 5.556949 |         |            | 5.551068 |         |            | 5.545188 |         |            |
| 27250,   | 675174, | 2223.5735, | 27288,   | 682816, | 2221.2203, | 27326,   | 688280, | 2218.8670, |
| 5.556794 |         |            | 5.550914 |         |            | 5.545033 |         |            |
| 27251,   | 675098, | 2223.5116, | 27289,   | 682876, | 2221.1583, | 27327,   | 688370, | 2218.8051, |
| 5.556640 |         |            | 5.550759 |         |            | 5.544878 |         |            |
| 27252,   | 675722, | 2223.4496, | 27290,   | 683318, | 2221.0964, | 27328,   | 688518, | 2218.7432, |
| 5.556485 |         |            | 5.550604 |         |            | 5.544723 |         |            |
| 27253,   | 676470, | 2223.3877, | 27291,   | 684136, | 2221.0345, | 27329,   | 688518, | 2218.6813, |
| 5.556330 |         |            | 5.550449 |         |            | 5.544569 |         |            |
| 27254,   | 676590, | 2223.3258, | 27292,   | 684672, | 2220.9726, | 27330,   | 688028, | 2218.6193, |
| 5.556175 |         |            | 5.550295 |         |            | 5.544414 |         |            |

|          |         |            |          |         |            |          |         |            |
|----------|---------|------------|----------|---------|------------|----------|---------|------------|
| 27331,   | 687236, | 2218.5574, | 27369,   | 691882, | 2216.2042, | 27407,   | 701248, | 2213.8510, |
| 5.544259 |         |            | 5.538378 |         |            | 5.532497 |         |            |
| 27332,   | 686860, | 2218.4955, | 27370,   | 690958, | 2216.1423, | 27408,   | 700386, | 2213.7890, |
| 5.544104 |         |            | 5.538223 |         |            | 5.532343 |         |            |
| 27333,   | 687426, | 2218.4336, | 27371,   | 691070, | 2216.0803, | 27409,   | 700338, | 2213.7271, |
| 5.543949 |         |            | 5.538069 |         |            | 5.532188 |         |            |
| 27334,   | 688626, | 2218.3716, | 27372,   | 691942, | 2216.0184, | 27410,   | 700764, | 2213.6652, |
| 5.543795 |         |            | 5.537914 |         |            | 5.532033 |         |            |
| 27335,   | 689574, | 2218.3097, | 27373,   | 692578, | 2215.9565, | 27411,   | 700912, | 2213.6033, |
| 5.543640 |         |            | 5.537759 |         |            | 5.531878 |         |            |
| 27336,   | 689678, | 2218.2478, | 27374,   | 692416, | 2215.8946, | 27412,   | 700604, | 2213.5413, |
| 5.543485 |         |            | 5.537604 |         |            | 5.531724 |         |            |
| 27337,   | 689170, | 2218.1859, | 27375,   | 691838, | 2215.8326, | 27413,   | 700474, | 2213.4794, |
| 5.543330 |         |            | 5.537450 |         |            | 5.531569 |         |            |
| 27338,   | 688744, | 2218.1239, | 27376,   | 691614, | 2215.7707, | 27414,   | 701166, | 2213.4175, |
| 5.543176 |         |            | 5.537295 |         |            | 5.531414 |         |            |
| 27339,   | 688806, | 2218.0620, | 27377,   | 691978, | 2215.7088, | 27415,   | 702482, | 2213.3556, |
| 5.543021 |         |            | 5.537140 |         |            | 5.531259 |         |            |
| 27340,   | 689148, | 2218.0001, | 27378,   | 692458, | 2215.6468, | 27416,   | 703548, | 2213.2936, |
| 5.542866 |         |            | 5.536985 |         |            | 5.531105 |         |            |
| 27341,   | 689410, | 2217.9381, | 27379,   | 692552, | 2215.5849, | 27417,   | 703814, | 2213.2317, |
| 5.542711 |         |            | 5.536831 |         |            | 5.530950 |         |            |
| 27342,   | 689596, | 2217.8762, | 27380,   | 692368, | 2215.5230, | 27418,   | 703682, | 2213.1698, |
| 5.542557 |         |            | 5.536676 |         |            | 5.530795 |         |            |
| 27343,   | 690014, | 2217.8143, | 27381,   | 692426, | 2215.4611, | 27419,   | 704000, | 2213.1078, |
| 5.542402 |         |            | 5.536521 |         |            | 5.530640 |         |            |
| 27344,   | 690722, | 2217.7524, | 27382,   | 692940, | 2215.3991, | 27420,   | 704950, | 2213.0459, |
| 5.542247 |         |            | 5.536366 |         |            | 5.530486 |         |            |
| 27345,   | 691258, | 2217.6904, | 27383,   | 693510, | 2215.3372, | 27421,   | 705738, | 2212.9840, |
| 5.542092 |         |            | 5.536212 |         |            | 5.530331 |         |            |
| 27346,   | 691094, | 2217.6285, | 27384,   | 693672, | 2215.2753, | 27422,   | 705460, | 2212.9221, |
| 5.541938 |         |            | 5.536057 |         |            | 5.530176 |         |            |
| 27347,   | 690286, | 2217.5666, | 27385,   | 693582, | 2215.2134, | 27423,   | 704190, | 2212.8601, |
| 5.541783 |         |            | 5.535902 |         |            | 5.530021 |         |            |
| 27348,   | 689522, | 2217.5047, | 27386,   | 693894, | 2215.1514, | 27424,   | 703026, | 2212.7982, |
| 5.541628 |         |            | 5.535747 |         |            | 5.529867 |         |            |
| 27349,   | 689458, | 2217.4427, | 27387,   | 694944, | 2215.0895, | 27425,   | 702948, | 2212.7363, |
| 5.541473 |         |            | 5.535593 |         |            | 5.529712 |         |            |
| 27350,   | 690050, | 2217.3808, | 27388,   | 696198, | 2215.0276, | 27426,   | 703822, | 2212.6744, |
| 5.541319 |         |            | 5.535438 |         |            | 5.529557 |         |            |
| 27351,   | 690680, | 2217.3189, | 27389,   | 696684, | 2214.9657, | 27427,   | 704580, | 2212.6124, |
| 5.541164 |         |            | 5.535283 |         |            | 5.529402 |         |            |
| 27352,   | 690900, | 2217.2569, | 27390,   | 696056, | 2214.9037, | 27428,   | 704424, | 2212.5505, |
| 5.541009 |         |            | 5.535128 |         |            | 5.529247 |         |            |
| 27353,   | 690896, | 2217.1950, | 27391,   | 694998, | 2214.8418, | 27429,   | 703616, | 2212.4886, |
| 5.540854 |         |            | 5.534974 |         |            | 5.529093 |         |            |
| 27354,   | 691162, | 2217.1331, | 27392,   | 694548, | 2214.7799, | 27430,   | 703084, | 2212.4266, |
| 5.540700 |         |            | 5.534819 |         |            | 5.528938 |         |            |
| 27355,   | 691806, | 2217.0712, | 27393,   | 695004, | 2214.7179, | 27431,   | 703340, | 2212.3647, |
| 5.540545 |         |            | 5.534664 |         |            | 5.528783 |         |            |
| 27356,   | 692372, | 2217.0092, | 27394,   | 695746, | 2214.6560, | 27432,   | 704010, | 2212.3028, |
| 5.540390 |         |            | 5.534509 |         |            | 5.528628 |         |            |
| 27357,   | 692408, | 2216.9473, | 27395,   | 696088, | 2214.5941, | 27433,   | 704432, | 2212.2409, |
| 5.540235 |         |            | 5.534355 |         |            | 5.528474 |         |            |
| 27358,   | 692060, | 2216.8854, | 27396,   | 696146, | 2214.5322, | 27434,   | 704528, | 2212.1789, |
| 5.540081 |         |            | 5.534200 |         |            | 5.528319 |         |            |
| 27359,   | 691894, | 2216.8235, | 27397,   | 696700, | 2214.4702, | 27435,   | 704828, | 2212.1170, |
| 5.539926 |         |            | 5.534045 |         |            | 5.528164 |         |            |
| 27360,   | 692152, | 2216.7615, | 27398,   | 698170, | 2214.4083, | 27436,   | 705728, | 2212.0551, |
| 5.539771 |         |            | 5.533890 |         |            | 5.528009 |         |            |
| 27361,   | 692376, | 2216.6996, | 27399,   | 699988, | 2214.3464, | 27437,   | 706912, | 2211.9932, |
| 5.539616 |         |            | 5.533735 |         |            | 5.527855 |         |            |
| 27362,   | 691954, | 2216.6377, | 27400,   | 701128, | 2214.2845, | 27438,   | 707704, | 2211.9312, |
| 5.539462 |         |            | 5.533581 |         |            | 5.527700 |         |            |
| 27363,   | 690962, | 2216.5758, | 27401,   | 701218, | 2214.2225, | 27439,   | 707902, | 2211.8693, |
| 5.539307 |         |            | 5.533426 |         |            | 5.527545 |         |            |
| 27364,   | 690294, | 2216.5138, | 27402,   | 700926, | 2214.1606, | 27440,   | 708000, | 2211.8074, |
| 5.539152 |         |            | 5.533271 |         |            | 5.527390 |         |            |
| 27365,   | 690748, | 2216.4519, | 27403,   | 701160, | 2214.0987, | 27441,   | 708528, | 2211.7455, |
| 5.538997 |         |            | 5.533116 |         |            | 5.527236 |         |            |
| 27366,   | 692094, | 2216.3900, | 27404,   | 702000, | 2214.0367, | 27442,   | 709308, | 2211.6835, |
| 5.538842 |         |            | 5.532962 |         |            | 5.527081 |         |            |
| 27367,   | 693156, | 2216.3280, | 27405,   | 702630, | 2213.9748, | 27443,   | 709588, | 2211.6216, |
| 5.538688 |         |            | 5.532807 |         |            | 5.526926 |         |            |
| 27368,   | 693002, | 2216.2661, | 27406,   | 702306, | 2213.9129, | 27444,   | 708982, | 2211.5597, |
| 5.538533 |         |            | 5.532652 |         |            | 5.526771 |         |            |

|          |         |            |          |         |            |          |         |            |
|----------|---------|------------|----------|---------|------------|----------|---------|------------|
| 27445,   | 708082, | 2211.4977, | 27483,   | 715448, | 2209.1445, | 27521,   | 722296, | 2206.7913, |
| 5.526617 |         |            | 5.520736 |         |            | 5.514855 |         |            |
| 27446,   | 707886, | 2211.4358, | 27484,   | 715204, | 2209.0826, | 27522,   | 722478, | 2206.7294, |
| 5.526462 |         |            | 5.520581 |         |            | 5.514700 |         |            |
| 27447,   | 708698, | 2211.3739, | 27485,   | 715442, | 2209.0207, | 27523,   | 723328, | 2206.6674, |
| 5.526307 |         |            | 5.520426 |         |            | 5.514546 |         |            |
| 27448,   | 709688, | 2211.3120, | 27486,   | 715460, | 2208.9587, | 27524,   | 724298, | 2206.6055, |
| 5.526152 |         |            | 5.520272 |         |            | 5.514391 |         |            |
| 27449,   | 709786, | 2211.2500, | 27487,   | 714620, | 2208.8968, | 27525,   | 724538, | 2206.5436, |
| 5.525998 |         |            | 5.520117 |         |            | 5.514236 |         |            |
| 27450,   | 708862, | 2211.1881, | 27488,   | 713244, | 2208.8349, | 27526,   | 723862, | 2206.4817, |
| 5.525843 |         |            | 5.519962 |         |            | 5.514081 |         |            |
| 27451,   | 707936, | 2211.1262, | 27489,   | 712442, | 2208.7730, | 27527,   | 722912, | 2206.4197, |
| 5.525688 |         |            | 5.519807 |         |            | 5.513926 |         |            |
| 27452,   | 708042, | 2211.0643, | 27490,   | 713010, | 2208.7110, | 27528,   | 722396, | 2206.3578, |
| 5.525533 |         |            | 5.519653 |         |            | 5.513772 |         |            |
| 27453,   | 709092, | 2211.0023, | 27491,   | 714550, | 2208.6491, | 27529,   | 722316, | 2206.2959, |
| 5.525379 |         |            | 5.519498 |         |            | 5.513617 |         |            |
| 27454,   | 709950, | 2210.9404, | 27492,   | 715890, | 2208.5872, | 27530,   | 722100, | 2206.2340, |
| 5.525224 |         |            | 5.519343 |         |            | 5.513462 |         |            |
| 27455,   | 709622, | 2210.8785, | 27493,   | 716282, | 2208.5253, | 27531,   | 721418, | 2206.1720, |
| 5.525069 |         |            | 5.519188 |         |            | 5.513307 |         |            |
| 27456,   | 708294, | 2210.8165, | 27494,   | 716022, | 2208.4633, | 27532,   | 720624, | 2206.1101, |
| 5.524914 |         |            | 5.519033 |         |            | 5.513153 |         |            |
| 27457,   | 707068, | 2210.7546, | 27495,   | 715938, | 2208.4014, | 27533,   | 720318, | 2206.0482, |
| 5.524760 |         |            | 5.518879 |         |            | 5.512998 |         |            |
| 27458,   | 706820, | 2210.6927, | 27496,   | 716334, | 2208.3395, | 27534,   | 720660, | 2205.9863, |
| 5.524605 |         |            | 5.518724 |         |            | 5.512843 |         |            |
| 27459,   | 707416, | 2210.6308, | 27497,   | 716734, | 2208.2775, | 27535,   | 721214, | 2205.9243, |
| 5.524450 |         |            | 5.518569 |         |            | 5.512688 |         |            |
| 27460,   | 708122, | 2210.5688, | 27498,   | 716622, | 2208.2156, | 27536,   | 721598, | 2205.8624, |
| 5.524295 |         |            | 5.518414 |         |            | 5.512534 |         |            |
| 27461,   | 708476, | 2210.5069, | 27499,   | 716216, | 2208.1537, | 27537,   | 721988, | 2205.8005, |
| 5.524140 |         |            | 5.518260 |         |            | 5.512379 |         |            |
| 27462,   | 708682, | 2210.4450, | 27500,   | 716296, | 2208.0918, | 27538,   | 722892, | 2205.7385, |
| 5.523986 |         |            | 5.518105 |         |            | 5.512224 |         |            |
| 27463,   | 709082, | 2210.3831, | 27501,   | 717218, | 2208.0298, | 27539,   | 724340, | 2205.6766, |
| 5.523831 |         |            | 5.517950 |         |            | 5.512069 |         |            |
| 27464,   | 709554, | 2210.3211, | 27502,   | 718364, | 2207.9679, | 27540,   | 725658, | 2205.6147, |
| 5.523676 |         |            | 5.517795 |         |            | 5.511915 |         |            |
| 27465,   | 709672, | 2210.2592, | 27503,   | 718734, | 2207.9060, | 27541,   | 726058, | 2205.5528, |
| 5.523521 |         |            | 5.517641 |         |            | 5.511760 |         |            |
| 27466,   | 709334, | 2210.1973, | 27504,   | 718044, | 2207.8441, | 27542,   | 725510, | 2205.4908, |
| 5.523367 |         |            | 5.517486 |         |            | 5.511605 |         |            |
| 27467,   | 709094, | 2210.1354, | 27505,   | 717064, | 2207.7821, | 27543,   | 724840, | 2205.4289, |
| 5.523212 |         |            | 5.517331 |         |            | 5.511450 |         |            |
| 27468,   | 709612, | 2210.0734, | 27506,   | 716786, | 2207.7202, | 27544,   | 724848, | 2205.3670, |
| 5.523057 |         |            | 5.517176 |         |            | 5.511296 |         |            |
| 27469,   | 710896, | 2210.0115, | 27507,   | 717354, | 2207.6583, | 27545,   | 725540, | 2205.3051, |
| 5.522902 |         |            | 5.517022 |         |            | 5.511141 |         |            |
| 27470,   | 712252, | 2209.9496, | 27508,   | 717990, | 2207.5964, | 27546,   | 726218, | 2205.2431, |
| 5.522748 |         |            | 5.516867 |         |            | 5.510986 |         |            |
| 27471,   | 712992, | 2209.8876, | 27509,   | 717964, | 2207.5344, | 27547,   | 726398, | 2205.1812, |
| 5.522593 |         |            | 5.516712 |         |            | 5.510831 |         |            |
| 27472,   | 713144, | 2209.8257, | 27510,   | 717408, | 2207.4725, | 27548,   | 726330, | 2205.1193, |
| 5.522438 |         |            | 5.516557 |         |            | 5.510677 |         |            |
| 27473,   | 713286, | 2209.7638, | 27511,   | 717116, | 2207.4106, | 27549,   | 726590, | 2205.0573, |
| 5.522283 |         |            | 5.516403 |         |            | 5.510522 |         |            |
| 27474,   | 713782, | 2209.7019, | 27512,   | 717528, | 2207.3486, | 27550,   | 727246, | 2204.9954, |
| 5.522129 |         |            | 5.516248 |         |            | 5.510367 |         |            |
| 27475,   | 714350, | 2209.6399, | 27513,   | 718214, | 2207.2867, | 27551,   | 727668, | 2204.9335, |
| 5.521974 |         |            | 5.516093 |         |            | 5.510212 |         |            |
| 27476,   | 714498, | 2209.5780, | 27514,   | 718440, | 2207.2248, | 27552,   | 727270, | 2204.8716, |
| 5.521819 |         |            | 5.515938 |         |            | 5.510058 |         |            |
| 27477,   | 714242, | 2209.5161, | 27515,   | 718136, | 2207.1629, | 27553,   | 726314, | 2204.8096, |
| 5.521664 |         |            | 5.515784 |         |            | 5.509903 |         |            |
| 27478,   | 714192, | 2209.4542, | 27516,   | 718058, | 2207.1009, | 27554,   | 725746, | 2204.7477, |
| 5.521510 |         |            | 5.515629 |         |            | 5.509748 |         |            |
| 27479,   | 714808, | 2209.3922, | 27517,   | 718922, | 2207.0390, | 27555,   | 726212, | 2204.6858, |
| 5.521355 |         |            | 5.515474 |         |            | 5.509593 |         |            |
| 27480,   | 715790, | 2209.3303, | 27518,   | 720526, | 2206.9771, | 27556,   | 727370, | 2204.6239, |
| 5.521200 |         |            | 5.515319 |         |            | 5.509439 |         |            |
| 27481,   | 716348, | 2209.2684, | 27519,   | 721914, | 2206.9152, | 27557,   | 728314, | 2204.5619, |
| 5.521045 |         |            | 5.515165 |         |            | 5.509284 |         |            |
| 27482,   | 716080, | 2209.2065, | 27520,   | 722400, | 2206.8532, | 27558,   | 728592, | 2204.5000, |
| 5.520891 |         |            | 5.515010 |         |            | 5.509129 |         |            |

|          |         |            |          |         |            |          |         |            |
|----------|---------|------------|----------|---------|------------|----------|---------|------------|
| 27559,   | 728638, | 2204.4381, | 27597,   | 738622, | 2202.0849, | 27635,   | 742674, | 2199.7316, |
| 5.508974 |         |            | 5.503093 |         |            | 5.497213 |         |            |
| 27560,   | 729132, | 2204.3762, | 27598,   | 738556, | 2202.0229, | 27636,   | 743588, | 2199.6697, |
| 5.508819 |         |            | 5.502939 |         |            | 5.497058 |         |            |
| 27561,   | 730040, | 2204.3142, | 27599,   | 738980, | 2201.9610, | 27637,   | 745170, | 2199.6078, |
| 5.508665 |         |            | 5.502784 |         |            | 5.496903 |         |            |
| 27562,   | 730570, | 2204.2523, | 27600,   | 739374, | 2201.8991, | 27638,   | 746276, | 2199.5459, |
| 5.508510 |         |            | 5.502629 |         |            | 5.496748 |         |            |
| 27563,   | 730086, | 2204.1904, | 27601,   | 739220, | 2201.8371, | 27639,   | 746098, | 2199.4839, |
| 5.508355 |         |            | 5.502474 |         |            | 5.496594 |         |            |
| 27564,   | 728976, | 2204.1284, | 27602,   | 738666, | 2201.7752, | 27640,   | 744974, | 2199.4220, |
| 5.508200 |         |            | 5.502320 |         |            | 5.496439 |         |            |
| 27565,   | 728316, | 2204.0665, | 27603,   | 738388, | 2201.7133, | 27641,   | 743968, | 2199.3601, |
| 5.508046 |         |            | 5.502165 |         |            | 5.496284 |         |            |
| 27566,   | 728730, | 2204.0046, | 27604,   | 738802, | 2201.6514, | 27642,   | 743746, | 2199.2981, |
| 5.507891 |         |            | 5.502010 |         |            | 5.496129 |         |            |
| 27567,   | 729712, | 2203.9427, | 27605,   | 739602, | 2201.5894, | 27643,   | 744000, | 2199.2362, |
| 5.507736 |         |            | 5.501855 |         |            | 5.495975 |         |            |
| 27568,   | 730140, | 2203.8807, | 27606,   | 740174, | 2201.5275, | 27644,   | 744052, | 2199.1743, |
| 5.507581 |         |            | 5.501701 |         |            | 5.495820 |         |            |
| 27569,   | 729452, | 2203.8188, | 27607,   | 740320, | 2201.4656, | 27645,   | 743798, | 2199.1124, |
| 5.507427 |         |            | 5.501546 |         |            | 5.495665 |         |            |
| 27570,   | 728176, | 2203.7569, | 27608,   | 740426, | 2201.4037, | 27646,   | 743900, | 2199.0504, |
| 5.507272 |         |            | 5.501391 |         |            | 5.495510 |         |            |
| 27571,   | 727246, | 2203.6950, | 27609,   | 740824, | 2201.3417, | 27647,   | 744924, | 2198.9885, |
| 5.507117 |         |            | 5.501236 |         |            | 5.495356 |         |            |
| 27572,   | 727048, | 2203.6330, | 27610,   | 741290, | 2201.2798, | 27648,   | 746536, | 2198.9266, |
| 5.506962 |         |            | 5.501082 |         |            | 5.495201 |         |            |
| 27573,   | 727232, | 2203.5711, | 27611,   | 741274, | 2201.2179, | 27649,   | 747690, | 2198.8647, |
| 5.506808 |         |            | 5.500927 |         |            | 5.495046 |         |            |
| 27574,   | 727418, | 2203.5092, | 27612,   | 740658, | 2201.1560, | 27650,   | 747642, | 2198.8027, |
| 5.506653 |         |            | 5.500772 |         |            | 5.494891 |         |            |
| 27575,   | 727818, | 2203.4472, | 27613,   | 740068, | 2201.0940, | 27651,   | 746656, | 2198.7408, |
| 5.506498 |         |            | 5.500617 |         |            | 5.494737 |         |            |
| 27576,   | 728926, | 2203.3853, | 27614,   | 740230, | 2201.0321, | 27652,   | 745668, | 2198.6789, |
| 5.506343 |         |            | 5.500463 |         |            | 5.494582 |         |            |
| 27577,   | 730740, | 2203.3234, | 27615,   | 741114, | 2200.9702, | 27653,   | 745326, | 2198.6169, |
| 5.506189 |         |            | 5.500308 |         |            | 5.494427 |         |            |
| 27578,   | 732460, | 2203.2615, | 27616,   | 741858, | 2200.9082, | 27654,   | 745532, | 2198.5550, |
| 5.506034 |         |            | 5.500153 |         |            | 5.494272 |         |            |
| 27579,   | 733238, | 2203.1995, | 27617,   | 741688, | 2200.8463, | 27655,   | 745866, | 2198.4931, |
| 5.505879 |         |            | 5.499998 |         |            | 5.494118 |         |            |
| 27580,   | 733058, | 2203.1376, | 27618,   | 740788, | 2200.7844, | 27656,   | 746234, | 2198.4312, |
| 5.505724 |         |            | 5.499844 |         |            | 5.493963 |         |            |
| 27581,   | 732792, | 2203.0757, | 27619,   | 740094, | 2200.7225, | 27657,   | 746896, | 2198.3692, |
| 5.505570 |         |            | 5.499689 |         |            | 5.493808 |         |            |
| 27582,   | 733206, | 2203.0138, | 27620,   | 740274, | 2200.6605, | 27658,   | 747948, | 2198.3073, |
| 5.505415 |         |            | 5.499534 |         |            | 5.493653 |         |            |
| 27583,   | 734146, | 2202.9518, | 27621,   | 740970, | 2200.5986, | 27659,   | 748970, | 2198.2454, |
| 5.505260 |         |            | 5.499379 |         |            | 5.493498 |         |            |
| 27584,   | 734786, | 2202.8899, | 27622,   | 741238, | 2200.5367, | 27660,   | 749372, | 2198.1835, |
| 5.505105 |         |            | 5.499225 |         |            | 5.493344 |         |            |
| 27585,   | 734654, | 2202.8280, | 27623,   | 740634, | 2200.4748, | 27661,   | 749086, | 2198.1215, |
| 5.504951 |         |            | 5.499070 |         |            | 5.493189 |         |            |
| 27586,   | 734230, | 2202.7661, | 27624,   | 739710, | 2200.4128, | 27662,   | 748636, | 2198.0596, |
| 5.504796 |         |            | 5.498915 |         |            | 5.493034 |         |            |
| 27587,   | 734398, | 2202.7041, | 27625,   | 739360, | 2200.3509, | 27663,   | 748532, | 2197.9977, |
| 5.504641 |         |            | 5.498760 |         |            | 5.492879 |         |            |
| 27588,   | 735414, | 2202.6422, | 27626,   | 739846, | 2200.2890, | 27664,   | 748658, | 2197.9358, |
| 5.504486 |         |            | 5.498605 |         |            | 5.492725 |         |            |
| 27589,   | 736590, | 2202.5803, | 27627,   | 740600, | 2200.2270, | 27665,   | 748506, | 2197.8738, |
| 5.504332 |         |            | 5.498451 |         |            | 5.492570 |         |            |
| 27590,   | 737078, | 2202.5183, | 27628,   | 740982, | 2200.1651, | 27666,   | 747926, | 2197.8119, |
| 5.504177 |         |            | 5.498296 |         |            | 5.492415 |         |            |
| 27591,   | 736836, | 2202.4564, | 27629,   | 741040, | 2200.1032, | 27667,   | 747496, | 2197.7500, |
| 5.504022 |         |            | 5.498141 |         |            | 5.492260 |         |            |
| 27592,   | 736646, | 2202.3945, | 27630,   | 741346, | 2200.0413, | 27668,   | 747912, | 2197.6880, |
| 5.503867 |         |            | 5.497986 |         |            | 5.492106 |         |            |
| 27593,   | 737174, | 2202.3326, | 27631,   | 742148, | 2199.9793, | 27669,   | 749142, | 2197.6261, |
| 5.503712 |         |            | 5.497832 |         |            | 5.491951 |         |            |
| 27594,   | 738228, | 2202.2706, | 27632,   | 742960, | 2199.9174, | 27670,   | 750306, | 2197.5642, |
| 5.503558 |         |            | 5.497677 |         |            | 5.491796 |         |            |
| 27595,   | 738994, | 2202.2087, | 27633,   | 743138, | 2199.8555, | 27671,   | 750582, | 2197.5023, |
| 5.503403 |         |            | 5.497522 |         |            | 5.491641 |         |            |
| 27596,   | 739004, | 2202.1468, | 27634,   | 742756, | 2199.7936, | 27672,   | 750148, | 2197.4403, |
| 5.503248 |         |            | 5.497367 |         |            | 5.491487 |         |            |

|          |         |            |          |         |            |          |         |            |
|----------|---------|------------|----------|---------|------------|----------|---------|------------|
| 27673,   | 749990, | 2197.3784, | 27711,   | 759150, | 2195.0252, | 27749,   | 769556, | 2192.6720, |
| 5.491332 |         |            | 5.485451 |         |            | 5.479570 |         |            |
| 27674,   | 750802, | 2197.3165, | 27712,   | 759976, | 2194.9633, | 27750,   | 769952, | 2192.6100, |
| 5.491177 |         |            | 5.485296 |         |            | 5.479416 |         |            |
| 27675,   | 752158, | 2197.2546, | 27713,   | 761302, | 2194.9013, | 27751,   | 770640, | 2192.5481, |
| 5.491022 |         |            | 5.485142 |         |            | 5.479261 |         |            |
| 27676,   | 752952, | 2197.1926, | 27714,   | 761988, | 2194.8394, | 27752,   | 770864, | 2192.4862, |
| 5.490868 |         |            | 5.484987 |         |            | 5.479106 |         |            |
| 27677,   | 752592, | 2197.1307, | 27715,   | 761536, | 2194.7775, | 27753,   | 770320, | 2192.4243, |
| 5.490713 |         |            | 5.484832 |         |            | 5.478951 |         |            |
| 27678,   | 751664, | 2197.0688, | 27716,   | 760606, | 2194.7156, | 27754,   | 769592, | 2192.3623, |
| 5.490558 |         |            | 5.484677 |         |            | 5.478796 |         |            |
| 27679,   | 751284, | 2197.0069, | 27717,   | 760214, | 2194.6536, | 27755,   | 769444, | 2192.3004, |
| 5.490403 |         |            | 5.484523 |         |            | 5.478642 |         |            |
| 27680,   | 751916, | 2196.9449, | 27718,   | 760628, | 2194.5917, | 27756,   | 769844, | 2192.2385, |
| 5.490249 |         |            | 5.484368 |         |            | 5.478487 |         |            |
| 27681,   | 753006, | 2196.8830, | 27719,   | 761148, | 2194.5298, | 27757,   | 769968, | 2192.1766, |
| 5.490094 |         |            | 5.484213 |         |            | 5.478332 |         |            |
| 27682,   | 753746, | 2196.8211, | 27720,   | 761038, | 2194.4678, | 27758,   | 769200, | 2192.1146, |
| 5.489939 |         |            | 5.484058 |         |            | 5.478177 |         |            |
| 27683,   | 753976, | 2196.7591, | 27721,   | 760420, | 2194.4059, | 27759,   | 767960, | 2192.0527, |
| 5.489784 |         |            | 5.483903 |         |            | 5.478023 |         |            |
| 27684,   | 754230, | 2196.6972, | 27722,   | 760148, | 2194.3440, | 27760,   | 767382, | 2191.9908, |
| 5.489630 |         |            | 5.483749 |         |            | 5.477868 |         |            |
| 27685,   | 754838, | 2196.6353, | 27723,   | 760774, | 2194.2821, | 27761,   | 768112, | 2191.9288, |
| 5.489475 |         |            | 5.483594 |         |            | 5.477713 |         |            |
| 27686,   | 755350, | 2196.5734, | 27724,   | 761890, | 2194.2201, | 27762,   | 769650, | 2191.8669, |
| 5.489320 |         |            | 5.483439 |         |            | 5.477558 |         |            |
| 27687,   | 755014, | 2196.5114, | 27725,   | 762580, | 2194.1582, | 27763,   | 770894, | 2191.8050, |
| 5.489165 |         |            | 5.483284 |         |            | 5.477404 |         |            |
| 27688,   | 753760, | 2196.4495, | 27726,   | 762424, | 2194.0963, | 27764,   | 771308, | 2191.7431, |
| 5.489011 |         |            | 5.483130 |         |            | 5.477249 |         |            |
| 27689,   | 752542, | 2196.3876, | 27727,   | 761890, | 2194.0344, | 27765,   | 771342, | 2191.6811, |
| 5.488856 |         |            | 5.482975 |         |            | 5.477094 |         |            |
| 27690,   | 752438, | 2196.3257, | 27728,   | 761690, | 2193.9724, | 27766,   | 771732, | 2191.6192, |
| 5.488701 |         |            | 5.482820 |         |            | 5.476939 |         |            |
| 27691,   | 753612, | 2196.2637, | 27729,   | 761908, | 2193.9105, | 27767,   | 772592, | 2191.5573, |
| 5.488546 |         |            | 5.482665 |         |            | 5.476785 |         |            |
| 27692,   | 755144, | 2196.2018, | 27730,   | 761992, | 2193.8486, | 27768,   | 773360, | 2191.4954, |
| 5.488391 |         |            | 5.482511 |         |            | 5.476630 |         |            |
| 27693,   | 756024, | 2196.1399, | 27731,   | 761498, | 2193.7867, | 27769,   | 773616, | 2191.4334, |
| 5.488237 |         |            | 5.482356 |         |            | 5.476475 |         |            |
| 27694,   | 756116, | 2196.0779, | 27732,   | 760720, | 2193.7247, | 27770,   | 773676, | 2191.3715, |
| 5.488082 |         |            | 5.482201 |         |            | 5.476320 |         |            |
| 27695,   | 756080, | 2196.0160, | 27733,   | 760328, | 2193.6628, | 27771,   | 774182, | 2191.3096, |
| 5.487927 |         |            | 5.482046 |         |            | 5.476166 |         |            |
| 27696,   | 756458, | 2195.9541, | 27734,   | 760580, | 2193.6009, | 27772,   | 775240, | 2191.2476, |
| 5.487772 |         |            | 5.481892 |         |            | 5.476011 |         |            |
| 27697,   | 757030, | 2195.8922, | 27735,   | 761042, | 2193.5389, | 27773,   | 776144, | 2191.1857, |
| 5.487618 |         |            | 5.481737 |         |            | 5.475856 |         |            |
| 27698,   | 757240, | 2195.8302, | 27736,   | 761220, | 2193.4770, | 27774,   | 776124, | 2191.1238, |
| 5.487463 |         |            | 5.481582 |         |            | 5.475701 |         |            |
| 27699,   | 756988, | 2195.7683, | 27737,   | 761304, | 2193.4151, | 27775,   | 775282, | 2191.0619, |
| 5.487308 |         |            | 5.481427 |         |            | 5.475547 |         |            |
| 27700,   | 756872, | 2195.7064, | 27738,   | 761962, | 2193.3532, | 27776,   | 774546, | 2190.9999, |
| 5.487153 |         |            | 5.481273 |         |            | 5.475392 |         |            |
| 27701,   | 757490, | 2195.6445, | 27739,   | 763456, | 2193.2912, | 27777,   | 774700, | 2190.9380, |
| 5.486999 |         |            | 5.481118 |         |            | 5.475237 |         |            |
| 27702,   | 758726, | 2195.5825, | 27740,   | 765084, | 2193.2293, | 27778,   | 775588, | 2190.8761, |
| 5.486844 |         |            | 5.480963 |         |            | 5.475082 |         |            |
| 27703,   | 759854, | 2195.5206, | 27741,   | 765780, | 2193.1674, | 27779,   | 776358, | 2190.8142, |
| 5.486689 |         |            | 5.480808 |         |            | 5.474928 |         |            |
| 27704,   | 760352, | 2195.4587, | 27742,   | 765288, | 2193.1055, | 27780,   | 776450, | 2190.7522, |
| 5.486534 |         |            | 5.480654 |         |            | 5.474773 |         |            |
| 27705,   | 760438, | 2195.3968, | 27743,   | 764582, | 2193.0435, | 27781,   | 776178, | 2190.6903, |
| 5.486380 |         |            | 5.480499 |         |            | 5.474618 |         |            |
| 27706,   | 760638, | 2195.3348, | 27744,   | 764902, | 2192.9816, | 27782,   | 776214, | 2190.6284, |
| 5.486225 |         |            | 5.480344 |         |            | 5.474463 |         |            |
| 27707,   | 761036, | 2195.2729, | 27745,   | 766514, | 2192.9197, | 27783,   | 776730, | 2190.5665, |
| 5.486070 |         |            | 5.480189 |         |            | 5.474309 |         |            |
| 27708,   | 761104, | 2195.2110, | 27746,   | 768448, | 2192.8577, | 27784,   | 777196, | 2190.5045, |
| 5.485915 |         |            | 5.480035 |         |            | 5.474154 |         |            |
| 27709,   | 760434, | 2195.1490, | 27747,   | 769558, | 2192.7958, | 27785,   | 777132, | 2190.4426, |
| 5.485761 |         |            | 5.479880 |         |            | 5.473999 |         |            |
| 27710,   | 759462, | 2195.0871, | 27748,   | 769658, | 2192.7339, | 27786,   | 776768, | 2190.3807, |
| 5.485606 |         |            | 5.479725 |         |            | 5.473844 |         |            |

|          |         |            |          |         |            |          |         |            |
|----------|---------|------------|----------|---------|------------|----------|---------|------------|
| 27787,   | 776870, | 2190.3187, | 27825,   | 784970, | 2187.9655, | 27863,   | 792580, | 2185.6123, |
| 5.473689 |         |            | 5.467809 |         |            | 5.461928 |         |            |
| 27788,   | 777794, | 2190.2568, | 27826,   | 785936, | 2187.9036, | 27864,   | 793656, | 2185.5504, |
| 5.473535 |         |            | 5.467654 |         |            | 5.461773 |         |            |
| 27789,   | 779036, | 2190.1949, | 27827,   | 786738, | 2187.8417, | 27865,   | 795020, | 2185.4884, |
| 5.473380 |         |            | 5.467499 |         |            | 5.461618 |         |            |
| 27790,   | 779734, | 2190.1330, | 27828,   | 786788, | 2187.7797, | 27866,   | 795796, | 2185.4265, |
| 5.473225 |         |            | 5.467344 |         |            | 5.461464 |         |            |
| 27791,   | 779630, | 2190.0710, | 27829,   | 786230, | 2187.7178, | 27867,   | 795726, | 2185.3646, |
| 5.473070 |         |            | 5.467190 |         |            | 5.461309 |         |            |
| 27792,   | 779288, | 2190.0091, | 27830,   | 785836, | 2187.6559, | 27868,   | 795366, | 2185.3027, |
| 5.472916 |         |            | 5.467035 |         |            | 5.461154 |         |            |
| 27793,   | 779378, | 2189.9472, | 27831,   | 786170, | 2187.5940, | 27869,   | 795342, | 2185.2407, |
| 5.472761 |         |            | 5.466880 |         |            | 5.460999 |         |            |
| 27794,   | 779842, | 2189.8853, | 27832,   | 786906, | 2187.5320, | 27870,   | 795640, | 2185.1788, |
| 5.472606 |         |            | 5.466725 |         |            | 5.460845 |         |            |
| 27795,   | 780028, | 2189.8233, | 27833,   | 787178, | 2187.4701, | 27871,   | 795752, | 2185.1169, |
| 5.472451 |         |            | 5.466571 |         |            | 5.460690 |         |            |
| 27796,   | 779598, | 2189.7614, | 27834,   | 786586, | 2187.4082, | 27872,   | 795430, | 2185.0550, |
| 5.472297 |         |            | 5.466416 |         |            | 5.460535 |         |            |
| 27797,   | 779092, | 2189.6995, | 27835,   | 785696, | 2187.3463, | 27873,   | 795052, | 2184.9930, |
| 5.472142 |         |            | 5.466261 |         |            | 5.460380 |         |            |
| 27798,   | 779404, | 2189.6375, | 27836,   | 785458, | 2187.2843, | 27874,   | 795162, | 2184.9311, |
| 5.471987 |         |            | 5.466106 |         |            | 5.460226 |         |            |
| 27799,   | 780722, | 2189.5756, | 27837,   | 786178, | 2187.2224, | 27875,   | 795746, | 2184.8692, |
| 5.471832 |         |            | 5.465952 |         |            | 5.460071 |         |            |
| 27800,   | 782176, | 2189.5137, | 27838,   | 787266, | 2187.1605, | 27876,   | 796216, | 2184.8072, |
| 5.471678 |         |            | 5.465797 |         |            | 5.459916 |         |            |
| 27801,   | 782690, | 2189.4518, | 27839,   | 787982, | 2187.0985, | 27877,   | 796140, | 2184.7453, |
| 5.471523 |         |            | 5.465642 |         |            | 5.459761 |         |            |
| 27802,   | 782078, | 2189.3898, | 27840,   | 788300, | 2187.0366, | 27878,   | 795854, | 2184.6834, |
| 5.471368 |         |            | 5.465487 |         |            | 5.459607 |         |            |
| 27803,   | 781166, | 2189.3279, | 27841,   | 788830, | 2186.9747, | 27879,   | 796100, | 2184.6215, |
| 5.471213 |         |            | 5.465333 |         |            | 5.459452 |         |            |
| 27804,   | 780856, | 2189.2660, | 27842,   | 789948, | 2186.9128, | 27880,   | 797160, | 2184.5595, |
| 5.471059 |         |            | 5.465178 |         |            | 5.459297 |         |            |
| 27805,   | 781204, | 2189.2041, | 27843,   | 791180, | 2186.8508, | 27881,   | 798384, | 2184.4976, |
| 5.470904 |         |            | 5.465023 |         |            | 5.459142 |         |            |
| 27806,   | 781534, | 2189.1421, | 27844,   | 791640, | 2186.7889, | 27882,   | 798856, | 2184.4357, |
| 5.470749 |         |            | 5.464868 |         |            | 5.458988 |         |            |
| 27807,   | 781400, | 2189.0802, | 27845,   | 791036, | 2186.7270, | 27883,   | 798352, | 2184.3738, |
| 5.470594 |         |            | 5.464714 |         |            | 5.458833 |         |            |
| 27808,   | 781162, | 2189.0183, | 27846,   | 790048, | 2186.6651, | 27884,   | 797588, | 2184.3118, |
| 5.470440 |         |            | 5.464559 |         |            | 5.458678 |         |            |
| 27809,   | 781502, | 2188.9564, | 27847,   | 789644, | 2186.6031, | 27885,   | 797392, | 2184.2499, |
| 5.470285 |         |            | 5.464404 |         |            | 5.458523 |         |            |
| 27810,   | 782454, | 2188.8944, | 27848,   | 790074, | 2186.5412, | 27886,   | 797812, | 2184.1880, |
| 5.470130 |         |            | 5.464249 |         |            | 5.458368 |         |            |
| 27811,   | 783214, | 2188.8325, | 27849,   | 790726, | 2186.4793, | 27887,   | 798182, | 2184.1261, |
| 5.469975 |         |            | 5.464095 |         |            | 5.458214 |         |            |
| 27812,   | 782954, | 2188.7706, | 27850,   | 790944, | 2186.4173, | 27888,   | 797980, | 2184.0641, |
| 5.469821 |         |            | 5.463940 |         |            | 5.458059 |         |            |
| 27813,   | 781816, | 2188.7086, | 27851,   | 790748, | 2186.3554, | 27889,   | 797482, | 2184.0022, |
| 5.469666 |         |            | 5.463785 |         |            | 5.457904 |         |            |
| 27814,   | 780836, | 2188.6467, | 27852,   | 790704, | 2186.2935, | 27890,   | 797410, | 2183.9403, |
| 5.469511 |         |            | 5.463630 |         |            | 5.457749 |         |            |
| 27815,   | 780910, | 2188.5848, | 27853,   | 791088, | 2186.2316, | 27891,   | 798030, | 2183.8783, |
| 5.469356 |         |            | 5.463475 |         |            | 5.457595 |         |            |
| 27816,   | 781934, | 2188.5229, | 27854,   | 791448, | 2186.1696, | 27892,   | 798854, | 2183.8164, |
| 5.469202 |         |            | 5.463321 |         |            | 5.457440 |         |            |
| 27817,   | 783018, | 2188.4609, | 27855,   | 791174, | 2186.1077, | 27893,   | 799262, | 2183.7545, |
| 5.469047 |         |            | 5.463166 |         |            | 5.457285 |         |            |
| 27818,   | 783466, | 2188.3990, | 27856,   | 790328, | 2186.0458, | 27894,   | 799308, | 2183.6926, |
| 5.468892 |         |            | 5.463011 |         |            | 5.457130 |         |            |
| 27819,   | 783404, | 2188.3371, | 27857,   | 789740, | 2185.9839, | 27895,   | 799644, | 2183.6306, |
| 5.468737 |         |            | 5.462856 |         |            | 5.456976 |         |            |
| 27820,   | 783404, | 2188.2752, | 27858,   | 790144, | 2185.9219, | 27896,   | 800670, | 2183.5687, |
| 5.468582 |         |            | 5.462702 |         |            | 5.456821 |         |            |
| 27821,   | 783732, | 2188.2132, | 27859,   | 791324, | 2185.8600, | 27897,   | 801886, | 2183.5068, |
| 5.468428 |         |            | 5.462547 |         |            | 5.456666 |         |            |
| 27822,   | 784120, | 2188.1513, | 27860,   | 792350, | 2185.7981, | 27898,   | 802362, | 2183.4449, |
| 5.468273 |         |            | 5.462392 |         |            | 5.456511 |         |            |
| 27823,   | 784290, | 2188.0894, | 27861,   | 792578, | 2185.7362, | 27899,   | 801820, | 2183.3829, |
| 5.468118 |         |            | 5.462237 |         |            | 5.456357 |         |            |
| 27824,   | 784428, | 2188.0274, | 27862,   | 792354, | 2185.6742, | 27900,   | 801050, | 2183.3210, |
| 5.467963 |         |            | 5.462083 |         |            | 5.456202 |         |            |



|          |         |            |          |         |            |          |         |            |
|----------|---------|------------|----------|---------|------------|----------|---------|------------|
| 27901,   | 801128, | 2183.2591, | 27939,   | 810514, | 2180.9059, | 27977,   | 818252, | 2178.5526, |
| 5.456047 |         |            | 5.450166 |         |            | 5.444286 |         |            |
| 27902,   | 802280, | 2183.1972, | 27940,   | 811430, | 2180.8439, | 27978,   | 818334, | 2178.4907, |
| 5.455892 |         |            | 5.450012 |         |            | 5.444131 |         |            |
| 27903,   | 803636, | 2183.1352, | 27941,   | 812180, | 2180.7820, | 27979,   | 818358, | 2178.4288, |
| 5.455738 |         |            | 5.449857 |         |            | 5.443976 |         |            |
| 27904,   | 804192, | 2183.0733, | 27942,   | 812316, | 2180.7201, | 27980,   | 817904, | 2178.3669, |
| 5.455583 |         |            | 5.449702 |         |            | 5.443821 |         |            |
| 27905,   | 803866, | 2183.0114, | 27943,   | 812058, | 2180.6581, | 27981,   | 817336, | 2178.3049, |
| 5.455428 |         |            | 5.449547 |         |            | 5.443667 |         |            |
| 27906,   | 803518, | 2182.9494, | 27944,   | 812022, | 2180.5962, | 27982,   | 817396, | 2178.2430, |
| 5.455273 |         |            | 5.449393 |         |            | 5.443512 |         |            |
| 27907,   | 803916, | 2182.8875, | 27945,   | 812502, | 2180.5343, | 27983,   | 818240, | 2178.1811, |
| 5.455119 |         |            | 5.449238 |         |            | 5.443357 |         |            |
| 27908,   | 804914, | 2182.8256, | 27946,   | 813136, | 2180.4724, | 27984,   | 819166, | 2178.1191, |
| 5.454964 |         |            | 5.449083 |         |            | 5.443202 |         |            |
| 27909,   | 805708, | 2182.7637, | 27947,   | 813424, | 2180.4104, | 27985,   | 819406, | 2178.0572, |
| 5.454809 |         |            | 5.448928 |         |            | 5.443047 |         |            |
| 27910,   | 805798, | 2182.7017, | 27948,   | 813376, | 2180.3485, | 27986,   | 819028, | 2177.9953, |
| 5.454654 |         |            | 5.448774 |         |            | 5.442893 |         |            |
| 27911,   | 805492, | 2182.6398, | 27949,   | 813540, | 2180.2866, | 27987,   | 818884, | 2177.9334, |
| 5.454500 |         |            | 5.448619 |         |            | 5.442738 |         |            |
| 27912,   | 805392, | 2182.5779, | 27950,   | 814278, | 2180.2247, | 27988,   | 819602, | 2177.8714, |
| 5.454345 |         |            | 5.448464 |         |            | 5.442583 |         |            |
| 27913,   | 805586, | 2182.5160, | 27951,   | 815250, | 2180.1627, | 27989,   | 820826, | 2177.8095, |
| 5.454190 |         |            | 5.448309 |         |            | 5.442428 |         |            |
| 27914,   | 805552, | 2182.4540, | 27952,   | 815758, | 2180.1008, | 27990,   | 821578, | 2177.7476, |
| 5.454035 |         |            | 5.448154 |         |            | 5.442274 |         |            |
| 27915,   | 804908, | 2182.3921, | 27953,   | 815596, | 2180.0389, | 27991,   | 821360, | 2177.6857, |
| 5.453881 |         |            | 5.448000 |         |            | 5.442119 |         |            |
| 27916,   | 804044, | 2182.3302, | 27954,   | 815378, | 2179.9770, | 27992,   | 820726, | 2177.6237, |
| 5.453726 |         |            | 5.447845 |         |            | 5.441964 |         |            |
| 27917,   | 803760, | 2182.2682, | 27955,   | 815910, | 2179.9150, | 27993,   | 820676, | 2177.5618, |
| 5.453571 |         |            | 5.447690 |         |            | 5.441809 |         |            |
| 27918,   | 804376, | 2182.2063, | 27956,   | 817244, | 2179.8531, | 27994,   | 821588, | 2177.4999, |
| 5.453416 |         |            | 5.447535 |         |            | 5.441655 |         |            |
| 27919,   | 805280, | 2182.1444, | 27957,   | 818562, | 2179.7912, | 27995,   | 822908, | 2177.4379, |
| 5.453261 |         |            | 5.447381 |         |            | 5.441500 |         |            |
| 27920,   | 805606, | 2182.0825, | 27958,   | 819010, | 2179.7292, | 27996,   | 823880, | 2177.3760, |
| 5.453107 |         |            | 5.447226 |         |            | 5.441345 |         |            |
| 27921,   | 805196, | 2182.0205, | 27959,   | 818570, | 2179.6673, | 27997,   | 824404, | 2177.3141, |
| 5.452952 |         |            | 5.447071 |         |            | 5.441190 |         |            |
| 27922,   | 804800, | 2181.9586, | 27960,   | 817984, | 2179.6054, | 27998,   | 824998, | 2177.2522, |
| 5.452797 |         |            | 5.446916 |         |            | 5.441036 |         |            |
| 27923,   | 805200, | 2181.8967, | 27961,   | 817866, | 2179.5435, | 27999,   | 825990, | 2177.1902, |
| 5.452642 |         |            | 5.446762 |         |            | 5.440881 |         |            |
| 27924,   | 806300, | 2181.8348, | 27962,   | 818052, | 2179.4815, | 28000,   | 826958, | 2177.1283, |
| 5.452488 |         |            | 5.446607 |         |            | 5.440726 |         |            |
| 27925,   | 807184, | 2181.7728, | 27963,   | 817986, | 2179.4196, | 28001,   | 827174, | 2177.0664, |
| 5.452333 |         |            | 5.446452 |         |            | 5.440571 |         |            |
| 27926,   | 807146, | 2181.7109, | 27964,   | 817540, | 2179.3577, | 28002,   | 826472, | 2177.0045, |
| 5.452178 |         |            | 5.446297 |         |            | 5.440417 |         |            |
| 27927,   | 806436, | 2181.6490, | 27965,   | 817296, | 2179.2958, | 28003,   | 825500, | 2176.9425, |
| 5.452023 |         |            | 5.446143 |         |            | 5.440262 |         |            |
| 27928,   | 805974, | 2181.5871, | 27966,   | 817852, | 2179.2338, | 28004,   | 825042, | 2176.8806, |
| 5.451869 |         |            | 5.445988 |         |            | 5.440107 |         |            |
| 27929,   | 806374, | 2181.5251, | 27967,   | 819022, | 2179.1719, | 28005,   | 825184, | 2176.8187, |
| 5.451714 |         |            | 5.445833 |         |            | 5.439952 |         |            |
| 27930,   | 807360, | 2181.4632, | 27968,   | 819938, | 2179.1100, | 28006,   | 825356, | 2176.7568, |
| 5.451559 |         |            | 5.445678 |         |            | 5.439798 |         |            |
| 27931,   | 808218, | 2181.4013, | 27969,   | 819982, | 2179.0480, | 28007,   | 825150, | 2176.6948, |
| 5.451404 |         |            | 5.445524 |         |            | 5.439643 |         |            |
| 27932,   | 808614, | 2181.3393, | 27970,   | 819472, | 2178.9861, | 28008,   | 824926, | 2176.6329, |
| 5.451250 |         |            | 5.445369 |         |            | 5.439488 |         |            |
| 27933,   | 808834, | 2181.2774, | 27971,   | 819310, | 2178.9242, | 28009,   | 825400, | 2176.5710, |
| 5.451095 |         |            | 5.445214 |         |            | 5.439333 |         |            |
| 27934,   | 809254, | 2181.2155, | 27972,   | 819900, | 2178.8623, | 28010,   | 826736, | 2176.5090, |
| 5.450940 |         |            | 5.445059 |         |            | 5.439179 |         |            |
| 27935,   | 809808, | 2181.1536, | 27973,   | 820678, | 2178.8003, | 28011,   | 828220, | 2176.4471, |
| 5.450785 |         |            | 5.444905 |         |            | 5.439024 |         |            |
| 27936,   | 810112, | 2181.0916, | 27974,   | 820740, | 2178.7384, | 28012,   | 828968, | 2176.3852, |
| 5.450631 |         |            | 5.444750 |         |            | 5.438869 |         |            |
| 27937,   | 810048, | 2181.0297, | 27975,   | 819874, | 2178.6765, | 28013,   | 828830, | 2176.3233, |
| 5.450476 |         |            | 5.444595 |         |            | 5.438714 |         |            |
| 27938,   | 810028, | 2180.9678, | 27976,   | 818774, | 2178.6146, | 28014,   | 828428, | 2176.2613, |
| 5.450321 |         |            | 5.444440 |         |            | 5.438559 |         |            |

|          |         |            |          |         |            |          |         |            |
|----------|---------|------------|----------|---------|------------|----------|---------|------------|
| 28015,   | 828344, | 2176.1994, | 28053,   | 837482, | 2173.8462, | 28091,   | 847924, | 2171.4930, |
| 5.438405 |         |            | 5.432524 |         |            | 5.426643 |         |            |
| 28016,   | 828394, | 2176.1375, | 28054,   | 838428, | 2173.7843, | 28092,   | 847718, | 2171.4310, |
| 5.438250 |         |            | 5.432369 |         |            | 5.426488 |         |            |
| 28017,   | 827922, | 2176.0756, | 28055,   | 839162, | 2173.7223, | 28093,   | 846824, | 2171.3691, |
| 5.438095 |         |            | 5.432214 |         |            | 5.426334 |         |            |
| 28018,   | 826722, | 2176.0136, | 28056,   | 839244, | 2173.6604, | 28094,   | 845372, | 2171.3072, |
| 5.437940 |         |            | 5.432060 |         |            | 5.426179 |         |            |
| 28019,   | 825482, | 2175.9517, | 28057,   | 839124, | 2173.5985, | 28095,   | 844314, | 2171.2453, |
| 5.437786 |         |            | 5.431905 |         |            | 5.426024 |         |            |
| 28020,   | 825112, | 2175.8898, | 28058,   | 839562, | 2173.5366, | 28096,   | 844556, | 2171.1833, |
| 5.437631 |         |            | 5.431750 |         |            | 5.425869 |         |            |
| 28021,   | 825816, | 2175.8278, | 28059,   | 840630, | 2173.4746, | 28097,   | 845988, | 2171.1214, |
| 5.437476 |         |            | 5.431595 |         |            | 5.425715 |         |            |
| 28022,   | 826904, | 2175.7659, | 28060,   | 841562, | 2173.4127, | 28098,   | 847562, | 2171.0595, |
| 5.437321 |         |            | 5.431441 |         |            | 5.425560 |         |            |
| 28023,   | 827674, | 2175.7040, | 28061,   | 841608, | 2173.3508, | 28099,   | 848362, | 2170.9976, |
| 5.437167 |         |            | 5.431286 |         |            | 5.425405 |         |            |
| 28024,   | 828238, | 2175.6421, | 28062,   | 840872, | 2173.2888, | 28100,   | 848452, | 2170.9356, |
| 5.437012 |         |            | 5.431131 |         |            | 5.425250 |         |            |
| 28025,   | 829302, | 2175.5801, | 28063,   | 840126, | 2173.2269, | 28101,   | 848606, | 2170.8737, |
| 5.436857 |         |            | 5.430976 |         |            | 5.425096 |         |            |
| 28026,   | 831186, | 2175.5182, | 28064,   | 839894, | 2173.1650, | 28102,   | 849300, | 2170.8118, |
| 5.436702 |         |            | 5.430822 |         |            | 5.424941 |         |            |
| 28027,   | 833220, | 2175.4563, | 28065,   | 839852, | 2173.1031, | 28103,   | 850166, | 2170.7498, |
| 5.436548 |         |            | 5.430667 |         |            | 5.424786 |         |            |
| 28028,   | 834340, | 2175.3944, | 28066,   | 839382, | 2173.0411, | 28104,   | 850520, | 2170.6879, |
| 5.436393 |         |            | 5.430512 |         |            | 5.424631 |         |            |
| 28029,   | 834212, | 2175.3324, | 28067,   | 838492, | 2172.9792, | 28105,   | 850264, | 2170.6260, |
| 5.436238 |         |            | 5.430357 |         |            | 5.424477 |         |            |
| 28030,   | 833584, | 2175.2705, | 28068,   | 837980, | 2172.9173, | 28106,   | 850028, | 2170.5641, |
| 5.436083 |         |            | 5.430203 |         |            | 5.424322 |         |            |
| 28031,   | 833478, | 2175.2086, | 28069,   | 838574, | 2172.8554, | 28107,   | 850408, | 2170.5021, |
| 5.435929 |         |            | 5.430048 |         |            | 5.424167 |         |            |
| 28032,   | 834112, | 2175.1467, | 28070,   | 840042, | 2172.7934, | 28108,   | 851216, | 2170.4402, |
| 5.435774 |         |            | 5.429893 |         |            | 5.424012 |         |            |
| 28033,   | 834778, | 2175.0847, | 28071,   | 841356, | 2172.7315, | 28109,   | 851706, | 2170.3783, |
| 5.435619 |         |            | 5.429738 |         |            | 5.423858 |         |            |
| 28034,   | 834746, | 2175.0228, | 28072,   | 841800, | 2172.6696, | 28110,   | 851496, | 2170.3164, |
| 5.435464 |         |            | 5.429584 |         |            | 5.423703 |         |            |
| 28035,   | 834108, | 2174.9609, | 28073,   | 841708, | 2172.6076, | 28111,   | 851034, | 2170.2544, |
| 5.435310 |         |            | 5.429429 |         |            | 5.423548 |         |            |
| 28036,   | 833538, | 2174.8989, | 28074,   | 842074, | 2172.5457, | 28112,   | 851062, | 2170.1925, |
| 5.435155 |         |            | 5.429274 |         |            | 5.423393 |         |            |
| 28037,   | 833384, | 2174.8370, | 28075,   | 843378, | 2172.4838, | 28113,   | 851686, | 2170.1306, |
| 5.435000 |         |            | 5.429119 |         |            | 5.423238 |         |            |
| 28038,   | 833230, | 2174.7751, | 28076,   | 845076, | 2172.4219, | 28114,   | 852230, | 2170.0686, |
| 5.434845 |         |            | 5.428965 |         |            | 5.423084 |         |            |
| 28039,   | 832482, | 2174.7132, | 28077,   | 846268, | 2172.3599, | 28115,   | 852056, | 2170.0067, |
| 5.434691 |         |            | 5.428810 |         |            | 5.422929 |         |            |
| 28040,   | 831278, | 2174.6512, | 28078,   | 846728, | 2172.2980, | 28116,   | 851374, | 2169.9448, |
| 5.434536 |         |            | 5.428655 |         |            | 5.422774 |         |            |
| 28041,   | 830530, | 2174.5893, | 28079,   | 847092, | 2172.2361, | 28117,   | 851066, | 2169.8829, |
| 5.434381 |         |            | 5.428500 |         |            | 5.422619 |         |            |
| 28042,   | 830982, | 2174.5274, | 28080,   | 847996, | 2172.1742, | 28118,   | 851666, | 2169.8209, |
| 5.434226 |         |            | 5.428345 |         |            | 5.422465 |         |            |
| 28043,   | 832374, | 2174.4655, | 28081,   | 849224, | 2172.1122, | 28119,   | 852750, | 2169.7590, |
| 5.434072 |         |            | 5.428191 |         |            | 5.422310 |         |            |
| 28044,   | 833692, | 2174.4035, | 28082,   | 849928, | 2172.0503, | 28120,   | 853426, | 2169.6971, |
| 5.433917 |         |            | 5.428036 |         |            | 5.422155 |         |            |
| 28045,   | 834272, | 2174.3416, | 28083,   | 849600, | 2171.9884, | 28121,   | 853398, | 2169.6352, |
| 5.433762 |         |            | 5.427881 |         |            | 5.422000 |         |            |
| 28046,   | 834460, | 2174.2797, | 28084,   | 848692, | 2171.9265, | 28122,   | 853286, | 2169.5732, |
| 5.433607 |         |            | 5.427726 |         |            | 5.421846 |         |            |
| 28047,   | 835094, | 2174.2177, | 28085,   | 848126, | 2171.8645, | 28123,   | 853844, | 2169.5113, |
| 5.433452 |         |            | 5.427572 |         |            | 5.421691 |         |            |
| 28048,   | 836408, | 2174.1558, | 28086,   | 848296, | 2171.8026, | 28124,   | 855006, | 2169.4494, |
| 5.433298 |         |            | 5.427417 |         |            | 5.421536 |         |            |
| 28049,   | 837682, | 2174.0939, | 28087,   | 848738, | 2171.7407, | 28125,   | 855902, | 2169.3875, |
| 5.433143 |         |            | 5.427262 |         |            | 5.421381 |         |            |
| 28050,   | 838074, | 2174.0320, | 28088,   | 848796, | 2171.6787, | 28126,   | 855876, | 2169.3255, |
| 5.432988 |         |            | 5.427107 |         |            | 5.421227 |         |            |
| 28051,   | 837594, | 2173.9700, | 28089,   | 848398, | 2171.6168, | 28127,   | 855248, | 2169.2636, |
| 5.432833 |         |            | 5.426953 |         |            | 5.421072 |         |            |
| 28052,   | 837140, | 2173.9081, | 28090,   | 848018, | 2171.5549, | 28128,   | 854958, | 2169.2017, |
| 5.432679 |         |            | 5.426798 |         |            | 5.420917 |         |            |

|          |         |            |          |         |            |          |         |            |
|----------|---------|------------|----------|---------|------------|----------|---------|------------|
| 28129,   | 855452, | 2169.1397, | 28167,   | 861896, | 2166.7865, | 28205,   | 874532, | 2164.4333, |
| 5.420762 |         |            | 5.414882 |         |            | 5.409001 |         |            |
| 28130,   | 856182, | 2169.0778, | 28168,   | 862606, | 2166.7246, | 28206,   | 874852, | 2164.3714, |
| 5.420608 |         |            | 5.414727 |         |            | 5.408846 |         |            |
| 28131,   | 856358, | 2169.0159, | 28169,   | 862942, | 2166.6627, | 28207,   | 874764, | 2164.3094, |
| 5.420453 |         |            | 5.414572 |         |            | 5.408691 |         |            |
| 28132,   | 855960, | 2168.9540, | 28170,   | 862768, | 2166.6007, | 28208,   | 874562, | 2164.2475, |
| 5.420298 |         |            | 5.414417 |         |            | 5.408537 |         |            |
| 28133,   | 855892, | 2168.8920, | 28171,   | 862728, | 2166.5388, | 28209,   | 875050, | 2164.1856, |
| 5.420143 |         |            | 5.414263 |         |            | 5.408382 |         |            |
| 28134,   | 856924, | 2168.8301, | 28172,   | 863444, | 2166.4769, | 28210,   | 876568, | 2164.1237, |
| 5.419989 |         |            | 5.414108 |         |            | 5.408227 |         |            |
| 28135,   | 858734, | 2168.7682, | 28173,   | 864710, | 2166.4150, | 28211,   | 878414, | 2164.0617, |
| 5.419834 |         |            | 5.413953 |         |            | 5.408072 |         |            |
| 28136,   | 860162, | 2168.7063, | 28174,   | 865716, | 2166.3530, | 28212,   | 879448, | 2163.9998, |
| 5.419679 |         |            | 5.413798 |         |            | 5.407917 |         |            |
| 28137,   | 860462, | 2168.6443, | 28175,   | 866022, | 2166.2911, | 28213,   | 879232, | 2163.9379, |
| 5.419524 |         |            | 5.413644 |         |            | 5.407763 |         |            |
| 28138,   | 860090, | 2168.5824, | 28176,   | 866054, | 2166.2292, | 28214,   | 878452, | 2163.8760, |
| 5.419370 |         |            | 5.413489 |         |            | 5.407608 |         |            |
| 28139,   | 860178, | 2168.5205, | 28177,   | 866580, | 2166.1673, | 28215,   | 878116, | 2163.8140, |
| 5.419215 |         |            | 5.413334 |         |            | 5.407453 |         |            |
| 28140,   | 861200, | 2168.4585, | 28178,   | 867730, | 2166.1053, | 28216,   | 878472, | 2163.7521, |
| 5.419060 |         |            | 5.413179 |         |            | 5.407298 |         |            |
| 28141,   | 862456, | 2168.3966, | 28179,   | 868806, | 2166.0434, | 28217,   | 878874, | 2163.6902, |
| 5.418905 |         |            | 5.413024 |         |            | 5.407144 |         |            |
| 28142,   | 862880, | 2168.3347, | 28180,   | 869128, | 2165.9815, | 28218,   | 878692, | 2163.6282, |
| 5.418751 |         |            | 5.412870 |         |            | 5.406989 |         |            |
| 28143,   | 862200, | 2168.2728, | 28181,   | 868898, | 2165.9195, | 28219,   | 878128, | 2163.5663, |
| 5.418596 |         |            | 5.412715 |         |            | 5.406834 |         |            |
| 28144,   | 861192, | 2168.2108, | 28182,   | 869008, | 2165.8576, | 28220,   | 877954, | 2163.5044, |
| 5.418441 |         |            | 5.412560 |         |            | 5.406679 |         |            |
| 28145,   | 860734, | 2168.1489, | 28183,   | 869984, | 2165.7957, | 28221,   | 878512, | 2163.4425, |
| 5.418286 |         |            | 5.412405 |         |            | 5.406525 |         |            |
| 28146,   | 860844, | 2168.0870, | 28184,   | 871312, | 2165.7338, | 28222,   | 879210, | 2163.3805, |
| 5.418131 |         |            | 5.412251 |         |            | 5.406370 |         |            |
| 28147,   | 860826, | 2168.0251, | 28185,   | 871964, | 2165.6718, | 28223,   | 879190, | 2163.3186, |
| 5.417977 |         |            | 5.412096 |         |            | 5.406215 |         |            |
| 28148,   | 860246, | 2167.9631, | 28186,   | 871528, | 2165.6099, | 28224,   | 878386, | 2163.2567, |
| 5.417822 |         |            | 5.411941 |         |            | 5.406060 |         |            |
| 28149,   | 859526, | 2167.9012, | 28187,   | 870716, | 2165.5480, | 28225,   | 877680, | 2163.1948, |
| 5.417667 |         |            | 5.411786 |         |            | 5.405906 |         |            |
| 28150,   | 859458, | 2167.8393, | 28188,   | 870536, | 2165.4861, | 28226,   | 877956, | 2163.1328, |
| 5.417512 |         |            | 5.411632 |         |            | 5.405751 |         |            |
| 28151,   | 860224, | 2167.7774, | 28189,   | 871206, | 2165.4241, | 28227,   | 879082, | 2163.0709, |
| 5.417358 |         |            | 5.411477 |         |            | 5.405596 |         |            |
| 28152,   | 861136, | 2167.7154, | 28190,   | 871982, | 2165.3622, | 28228,   | 880070, | 2163.0090, |
| 5.417203 |         |            | 5.411322 |         |            | 5.405441 |         |            |
| 28153,   | 861438, | 2167.6535, | 28191,   | 872080, | 2165.3003, | 28229,   | 880194, | 2162.9471, |
| 5.417048 |         |            | 5.411167 |         |            | 5.405287 |         |            |
| 28154,   | 861160, | 2167.5916, | 28192,   | 871568, | 2165.2383, | 28230,   | 879784, | 2162.8851, |
| 5.416893 |         |            | 5.411013 |         |            | 5.405132 |         |            |
| 28155,   | 861010, | 2167.5296, | 28193,   | 871250, | 2165.1764, | 28231,   | 879796, | 2162.8232, |
| 5.416739 |         |            | 5.410858 |         |            | 5.404977 |         |            |
| 28156,   | 861454, | 2167.4677, | 28194,   | 871670, | 2165.1145, | 28232,   | 880650, | 2162.7613, |
| 5.416584 |         |            | 5.410703 |         |            | 5.404822 |         |            |
| 28157,   | 862124, | 2167.4058, | 28195,   | 872506, | 2165.0526, | 28233,   | 881772, | 2162.6993, |
| 5.416429 |         |            | 5.410548 |         |            | 5.404668 |         |            |
| 28158,   | 862272, | 2167.3439, | 28196,   | 873016, | 2164.9906, | 28234,   | 882308, | 2162.6374, |
| 5.416274 |         |            | 5.410394 |         |            | 5.404513 |         |            |
| 28159,   | 861756, | 2167.2819, | 28197,   | 872976, | 2164.9287, | 28235,   | 882196, | 2162.5755, |
| 5.416120 |         |            | 5.410239 |         |            | 5.404358 |         |            |
| 28160,   | 861270, | 2167.2200, | 28198,   | 872914, | 2164.8668, | 28236,   | 882276, | 2162.5136, |
| 5.415965 |         |            | 5.410084 |         |            | 5.404203 |         |            |
| 28161,   | 861562, | 2167.1581, | 28199,   | 873420, | 2164.8049, | 28237,   | 883288, | 2162.4516, |
| 5.415810 |         |            | 5.409929 |         |            | 5.404049 |         |            |
| 28162,   | 862518, | 2167.0962, | 28200,   | 874368, | 2164.7429, | 28238,   | 885014, | 2162.3897, |
| 5.415655 |         |            | 5.409775 |         |            | 5.403894 |         |            |
| 28163,   | 863230, | 2167.0342, | 28201,   | 875042, | 2164.6810, | 28239,   | 886478, | 2162.3278, |
| 5.415501 |         |            | 5.409620 |         |            | 5.403739 |         |            |
| 28164,   | 862996, | 2166.9723, | 28202,   | 874964, | 2164.6191, | 28240,   | 887038, | 2162.2659, |
| 5.415346 |         |            | 5.409465 |         |            | 5.403584 |         |            |
| 28165,   | 862134, | 2166.9104, | 28203,   | 874466, | 2164.5572, | 28241,   | 887024, | 2162.2039, |
| 5.415191 |         |            | 5.409310 |         |            | 5.403430 |         |            |
| 28166,   | 861592, | 2166.8484, | 28204,   | 874248, | 2164.4952, | 28242,   | 887232, | 2162.1420, |
| 5.415036 |         |            | 5.409156 |         |            | 5.403275 |         |            |

|          |         |            |          |         |            |          |         |            |
|----------|---------|------------|----------|---------|------------|----------|---------|------------|
| 28243,   | 887942, | 2162.0801, | 28281,   | 895450, | 2159.7269, | 28319,   | 905356, | 2157.3736, |
| 5.403120 |         |            | 5.397239 |         |            | 5.391358 |         |            |
| 28244,   | 888588, | 2162.0181, | 28282,   | 897014, | 2159.6649, | 28320,   | 905440, | 2157.3117, |
| 5.402965 |         |            | 5.397084 |         |            | 5.391204 |         |            |
| 28245,   | 888526, | 2161.9562, | 28283,   | 897978, | 2159.6030, | 28321,   | 904952, | 2157.2498, |
| 5.402810 |         |            | 5.396930 |         |            | 5.391049 |         |            |
| 28246,   | 887858, | 2161.8943, | 28284,   | 898210, | 2159.5411, | 28322,   | 904624, | 2157.1879, |
| 5.402656 |         |            | 5.396775 |         |            | 5.390894 |         |            |
| 28247,   | 887306, | 2161.8324, | 28285,   | 898342, | 2159.4791, | 28323,   | 905418, | 2157.1259, |
| 5.402501 |         |            | 5.396620 |         |            | 5.390739 |         |            |
| 28248,   | 887310, | 2161.7704, | 28286,   | 898822, | 2159.4172, | 28324,   | 907376, | 2157.0640, |
| 5.402346 |         |            | 5.396465 |         |            | 5.390585 |         |            |
| 28249,   | 887448, | 2161.7085, | 28287,   | 899362, | 2159.3553, | 28325,   | 909416, | 2157.0021, |
| 5.402191 |         |            | 5.396311 |         |            | 5.390430 |         |            |
| 28250,   | 886940, | 2161.6466, | 28288,   | 899362, | 2159.2934, | 28326,   | 910336, | 2156.9401, |
| 5.402037 |         |            | 5.396156 |         |            | 5.390275 |         |            |
| 28251,   | 885670, | 2161.5847, | 28289,   | 898772, | 2159.2314, | 28327,   | 910034, | 2156.8782, |
| 5.401882 |         |            | 5.396001 |         |            | 5.390120 |         |            |
| 28252,   | 884478, | 2161.5227, | 28290,   | 898248, | 2159.1695, | 28328,   | 909458, | 2156.8163, |
| 5.401727 |         |            | 5.395846 |         |            | 5.389966 |         |            |
| 28253,   | 884354, | 2161.4608, | 28291,   | 898392, | 2159.1076, | 28329,   | 909478, | 2156.7544, |
| 5.401572 |         |            | 5.395692 |         |            | 5.389811 |         |            |
| 28254,   | 885412, | 2161.3989, | 28292,   | 899008, | 2159.0457, | 28330,   | 909918, | 2156.6924, |
| 5.401418 |         |            | 5.395537 |         |            | 5.389656 |         |            |
| 28255,   | 886824, | 2161.3370, | 28293,   | 899356, | 2158.9837, | 28331,   | 909874, | 2156.6305, |
| 5.401263 |         |            | 5.395382 |         |            | 5.389501 |         |            |
| 28256,   | 887746, | 2161.2750, | 28294,   | 899060, | 2158.9218, | 28332,   | 908888, | 2156.5686, |
| 5.401108 |         |            | 5.395227 |         |            | 5.389347 |         |            |
| 28257,   | 888124, | 2161.2131, | 28295,   | 898600, | 2158.8599, | 28333,   | 907578, | 2156.5067, |
| 5.400953 |         |            | 5.395073 |         |            | 5.389192 |         |            |
| 28258,   | 888504, | 2161.1512, | 28296,   | 898740, | 2158.7979, | 28334,   | 906986, | 2156.4447, |
| 5.400799 |         |            | 5.394918 |         |            | 5.389037 |         |            |
| 28259,   | 889174, | 2161.0892, | 28297,   | 899560, | 2158.7360, | 28335,   | 907458, | 2156.3828, |
| 5.400644 |         |            | 5.394763 |         |            | 5.388882 |         |            |
| 28260,   | 889730, | 2161.0273, | 28298,   | 900268, | 2158.6741, | 28336,   | 908342, | 2156.3209, |
| 5.400489 |         |            | 5.394608 |         |            | 5.388728 |         |            |
| 28261,   | 889648, | 2160.9654, | 28299,   | 900126, | 2158.6122, | 28337,   | 908890, | 2156.2589, |
| 5.400334 |         |            | 5.394454 |         |            | 5.388573 |         |            |
| 28262,   | 889050, | 2160.9035, | 28300,   | 899346, | 2158.5502, | 28338,   | 909110, | 2156.1970, |
| 5.400180 |         |            | 5.394299 |         |            | 5.388418 |         |            |
| 28263,   | 888724, | 2160.8415, | 28301,   | 898914, | 2158.4883, | 28339,   | 909616, | 2156.1351, |
| 5.400025 |         |            | 5.394144 |         |            | 5.388263 |         |            |
| 28264,   | 889238, | 2160.7796, | 28302,   | 899508, | 2158.4264, | 28340,   | 910658, | 2156.0732, |
| 5.399870 |         |            | 5.393989 |         |            | 5.388108 |         |            |
| 28265,   | 890274, | 2160.7177, | 28303,   | 900704, | 2158.3645, | 28341,   | 911590, | 2156.0112, |
| 5.399715 |         |            | 5.393835 |         |            | 5.387954 |         |            |
| 28266,   | 890966, | 2160.6558, | 28304,   | 901494, | 2158.3025, | 28342,   | 911538, | 2155.9493, |
| 5.399561 |         |            | 5.393680 |         |            | 5.387799 |         |            |
| 28267,   | 890948, | 2160.5938, | 28305,   | 901416, | 2158.2406, | 28343,   | 910504, | 2155.8874, |
| 5.399406 |         |            | 5.393525 |         |            | 5.387644 |         |            |
| 28268,   | 890792, | 2160.5319, | 28306,   | 901072, | 2158.1787, | 28344,   | 909562, | 2155.8255, |
| 5.399251 |         |            | 5.393370 |         |            | 5.387489 |         |            |
| 28269,   | 891348, | 2160.4700, | 28307,   | 901374, | 2158.1168, | 28345,   | 909800, | 2155.7635, |
| 5.399096 |         |            | 5.393215 |         |            | 5.387335 |         |            |
| 28270,   | 892728, | 2160.4080, | 28308,   | 902470, | 2158.0548, | 28346,   | 911182, | 2155.7016, |
| 5.398942 |         |            | 5.393061 |         |            | 5.387180 |         |            |
| 28271,   | 894122, | 2160.3461, | 28309,   | 903582, | 2157.9929, | 28347,   | 912616, | 2155.6397, |
| 5.398787 |         |            | 5.392906 |         |            | 5.387025 |         |            |
| 28272,   | 894716, | 2160.2842, | 28310,   | 903926, | 2157.9310, | 28348,   | 913172, | 2155.5778, |
| 5.398632 |         |            | 5.392751 |         |            | 5.386870 |         |            |
| 28273,   | 894620, | 2160.2223, | 28311,   | 903616, | 2157.8690, | 28349,   | 913070, | 2155.5158, |
| 5.398477 |         |            | 5.392596 |         |            | 5.386716 |         |            |
| 28274,   | 894672, | 2160.1603, | 28312,   | 903470, | 2157.8071, | 28350,   | 913310, | 2155.4539, |
| 5.398322 |         |            | 5.392442 |         |            | 5.386561 |         |            |
| 28275,   | 895372, | 2160.0984, | 28313,   | 904016, | 2157.7452, | 28351,   | 914452, | 2155.3920, |
| 5.398168 |         |            | 5.392287 |         |            | 5.386406 |         |            |
| 28276,   | 896240, | 2160.0365, | 28314,   | 904884, | 2157.6833, | 28352,   | 915992, | 2155.3300, |
| 5.398013 |         |            | 5.392132 |         |            | 5.386251 |         |            |
| 28277,   | 896320, | 2159.9746, | 28315,   | 905312, | 2157.6213, | 28353,   | 917000, | 2155.2681, |
| 5.397858 |         |            | 5.391977 |         |            | 5.386097 |         |            |
| 28278,   | 895386, | 2159.9126, | 28316,   | 905082, | 2157.5594, | 28354,   | 917244, | 2155.2062, |
| 5.397703 |         |            | 5.391823 |         |            | 5.385942 |         |            |
| 28279,   | 894320, | 2159.8507, | 28317,   | 904756, | 2157.4975, | 28355,   | 917402, | 2155.1443, |
| 5.397549 |         |            | 5.391668 |         |            | 5.385787 |         |            |
| 28280,   | 894264, | 2159.7888, | 28318,   | 904906, | 2157.4356, | 28356,   | 918168, | 2155.0823, |
| 5.397394 |         |            | 5.391513 |         |            | 5.385632 |         |            |

|          |         |            |          |         |            |          |         |            |
|----------|---------|------------|----------|---------|------------|----------|---------|------------|
| 28357,   | 919362, | 2155.0204, | 28395,   | 927510, | 2152.6672, | 28433,   | 941736, | 2150.3140, |
| 5.385478 |         |            | 5.379597 |         |            | 5.373716 |         |            |
| 28358,   | 920080, | 2154.9585, | 28396,   | 927922, | 2152.6053, | 28434,   | 942062, | 2150.2520, |
| 5.385323 |         |            | 5.379442 |         |            | 5.373561 |         |            |
| 28359,   | 919784, | 2154.8966, | 28397,   | 928050, | 2152.5433, | 28435,   | 941504, | 2150.1901, |
| 5.385168 |         |            | 5.379287 |         |            | 5.373407 |         |            |
| 28360,   | 918952, | 2154.8346, | 28398,   | 928242, | 2152.4814, | 28436,   | 940676, | 2150.1282, |
| 5.385013 |         |            | 5.379133 |         |            | 5.373252 |         |            |
| 28361,   | 918496, | 2154.7727, | 28399,   | 929068, | 2152.4195, | 28437,   | 940508, | 2150.0663, |
| 5.384859 |         |            | 5.378978 |         |            | 5.373097 |         |            |
| 28362,   | 918742, | 2154.7108, | 28400,   | 930416, | 2152.3576, | 28438,   | 941166, | 2150.0043, |
| 5.384704 |         |            | 5.378823 |         |            | 5.372942 |         |            |
| 28363,   | 919114, | 2154.6488, | 28401,   | 931418, | 2152.2956, | 28439,   | 941898, | 2149.9424, |
| 5.384549 |         |            | 5.378668 |         |            | 5.372787 |         |            |
| 28364,   | 918912, | 2154.5869, | 28402,   | 931424, | 2152.2337, | 28440,   | 941956, | 2149.8805, |
| 5.384394 |         |            | 5.378514 |         |            | 5.372633 |         |            |
| 28365,   | 918236, | 2154.5250, | 28403,   | 930844, | 2152.1718, | 28441,   | 941440, | 2149.8185, |
| 5.384240 |         |            | 5.378359 |         |            | 5.372478 |         |            |
| 28366,   | 917838, | 2154.4631, | 28404,   | 930784, | 2152.1098, | 28442,   | 941126, | 2149.7566, |
| 5.384085 |         |            | 5.378204 |         |            | 5.372323 |         |            |
| 28367,   | 918182, | 2154.4011, | 28405,   | 931822, | 2152.0479, | 28443,   | 941488, | 2149.6947, |
| 5.383930 |         |            | 5.378049 |         |            | 5.372168 |         |            |
| 28368,   | 918850, | 2154.3392, | 28406,   | 933260, | 2151.9860, | 28444,   | 942184, | 2149.6328, |
| 5.383775 |         |            | 5.377894 |         |            | 5.372014 |         |            |
| 28369,   | 919048, | 2154.2773, | 28407,   | 933862, | 2151.9241, | 28445,   | 942580, | 2149.5708, |
| 5.383621 |         |            | 5.377740 |         |            | 5.371859 |         |            |
| 28370,   | 918630, | 2154.2154, | 28408,   | 933220, | 2151.8621, | 28446,   | 942666, | 2149.5089, |
| 5.383466 |         |            | 5.377585 |         |            | 5.371704 |         |            |
| 28371,   | 918342, | 2154.1534, | 28409,   | 932228, | 2151.8002, | 28447,   | 943100, | 2149.4470, |
| 5.383311 |         |            | 5.377430 |         |            | 5.371549 |         |            |
| 28372,   | 918924, | 2154.0915, | 28410,   | 932134, | 2151.7383, | 28448,   | 944334, | 2149.3851, |
| 5.383156 |         |            | 5.377275 |         |            | 5.371395 |         |            |
| 28373,   | 920152, | 2154.0296, | 28411,   | 933240, | 2151.6764, | 28449,   | 945888, | 2149.3231, |
| 5.383001 |         |            | 5.377121 |         |            | 5.371240 |         |            |
| 28374,   | 921022, | 2153.9677, | 28412,   | 934700, | 2151.6144, | 28450,   | 946730, | 2149.2612, |
| 5.382847 |         |            | 5.376966 |         |            | 5.371085 |         |            |
| 28375,   | 920924, | 2153.9057, | 28413,   | 935552, | 2151.5525, | 28451,   | 946438, | 2149.1993, |
| 5.382692 |         |            | 5.376811 |         |            | 5.370930 |         |            |
| 28376,   | 920420, | 2153.8438, | 28414,   | 935754, | 2151.4906, | 28452,   | 945752, | 2149.1374, |
| 5.382537 |         |            | 5.376656 |         |            | 5.370776 |         |            |
| 28377,   | 920654, | 2153.7819, | 28415,   | 936050, | 2151.4286, | 28453,   | 945816, | 2149.0754, |
| 5.382382 |         |            | 5.376502 |         |            | 5.370621 |         |            |
| 28378,   | 921994, | 2153.7199, | 28416,   | 936938, | 2151.3667, | 28454,   | 946932, | 2149.0135, |
| 5.382228 |         |            | 5.376347 |         |            | 5.370466 |         |            |
| 28379,   | 923536, | 2153.6580, | 28417,   | 938064, | 2151.3048, | 28455,   | 948248, | 2148.9516, |
| 5.382073 |         |            | 5.376192 |         |            | 5.370311 |         |            |
| 28380,   | 924066, | 2153.5961, | 28418,   | 938720, | 2151.2429, | 28456,   | 948758, | 2148.8896, |
| 5.381918 |         |            | 5.376037 |         |            | 5.370157 |         |            |
| 28381,   | 923424, | 2153.5342, | 28419,   | 938786, | 2151.1809, | 28457,   | 948418, | 2148.8277, |
| 5.381763 |         |            | 5.375883 |         |            | 5.370002 |         |            |
| 28382,   | 922704, | 2153.4722, | 28420,   | 938856, | 2151.1190, | 28458,   | 948096, | 2148.7658, |
| 5.381609 |         |            | 5.375728 |         |            | 5.369847 |         |            |
| 28383,   | 923000, | 2153.4103, | 28421,   | 939430, | 2151.0571, | 28459,   | 948470, | 2148.7039, |
| 5.381454 |         |            | 5.375573 |         |            | 5.369692 |         |            |
| 28384,   | 924182, | 2153.3484, | 28422,   | 940152, | 2150.9952, | 28460,   | 949178, | 2148.6419, |
| 5.381299 |         |            | 5.375418 |         |            | 5.369538 |         |            |
| 28385,   | 925074, | 2153.2865, | 28423,   | 940158, | 2150.9332, | 28461,   | 949302, | 2148.5800, |
| 5.381144 |         |            | 5.375264 |         |            | 5.369383 |         |            |
| 28386,   | 924854, | 2153.2245, | 28424,   | 939176, | 2150.8713, | 28462,   | 948564, | 2148.5181, |
| 5.380990 |         |            | 5.375109 |         |            | 5.369228 |         |            |
| 28387,   | 924064, | 2153.1626, | 28425,   | 938026, | 2150.8094, | 28463,   | 947792, | 2148.4562, |
| 5.380835 |         |            | 5.374954 |         |            | 5.369073 |         |            |
| 28388,   | 924026, | 2153.1007, | 28426,   | 937854, | 2150.7475, | 28464,   | 948032, | 2148.3942, |
| 5.380680 |         |            | 5.374799 |         |            | 5.368919 |         |            |
| 28389,   | 925356, | 2153.0387, | 28427,   | 938934, | 2150.6855, | 28465,   | 949324, | 2148.3323, |
| 5.380525 |         |            | 5.374645 |         |            | 5.368764 |         |            |
| 28390,   | 927266, | 2152.9768, | 28428,   | 940348, | 2150.6236, | 28466,   | 950602, | 2148.2704, |
| 5.380371 |         |            | 5.374490 |         |            | 5.368609 |         |            |
| 28391,   | 928406, | 2152.9149, | 28429,   | 941002, | 2150.5617, | 28467,   | 950896, | 2148.2084, |
| 5.380216 |         |            | 5.374335 |         |            | 5.368454 |         |            |
| 28392,   | 928254, | 2152.8530, | 28430,   | 940778, | 2150.4997, | 28468,   | 950396, | 2148.1465, |
| 5.380061 |         |            | 5.374180 |         |            | 5.368300 |         |            |
| 28393,   | 927516, | 2152.7910, | 28431,   | 940512, | 2150.4378, | 28469,   | 950210, | 2148.0846, |
| 5.379906 |         |            | 5.374026 |         |            | 5.368145 |         |            |
| 28394,   | 927196, | 2152.7291, | 28432,   | 940924, | 2150.3759, | 28470,   | 951068, | 2148.0227, |
| 5.379752 |         |            | 5.373871 |         |            | 5.367990 |         |            |

|          |         |            |          |         |            |          |         |            |
|----------|---------|------------|----------|---------|------------|----------|---------|------------|
| 28471,   | 952504, | 2147.9607, | 28509,   | 963704, | 2145.6075, | 28547,   | 973892, | 2143.2543, |
| 5.367835 |         |            | 5.361954 |         |            | 5.356074 |         |            |
| 28472,   | 953436, | 2147.8988, | 28510,   | 964332, | 2145.5456, | 28548,   | 974362, | 2143.1924, |
| 5.367680 |         |            | 5.361800 |         |            | 5.355919 |         |            |
| 28473,   | 953478, | 2147.8369, | 28511,   | 963872, | 2145.4837, | 28549,   | 974496, | 2143.1304, |
| 5.367526 |         |            | 5.361645 |         |            | 5.355764 |         |            |
| 28474,   | 953334, | 2147.7750, | 28512,   | 963480, | 2145.4217, | 28550,   | 975148, | 2143.0685, |
| 5.367371 |         |            | 5.361490 |         |            | 5.355609 |         |            |
| 28475,   | 953940, | 2147.7130, | 28513,   | 964204, | 2145.3598, | 28551,   | 976798, | 2143.0066, |
| 5.367216 |         |            | 5.361335 |         |            | 5.355455 |         |            |
| 28476,   | 955268, | 2147.6511, | 28514,   | 965790, | 2145.2979, | 28552,   | 978776, | 2142.9447, |
| 5.367061 |         |            | 5.361181 |         |            | 5.355300 |         |            |
| 28477,   | 956316, | 2147.5892, | 28515,   | 966982, | 2145.2360, | 28553,   | 979838, | 2142.8827, |
| 5.366907 |         |            | 5.361026 |         |            | 5.355145 |         |            |
| 28478,   | 956216, | 2147.5273, | 28516,   | 966940, | 2145.1740, | 28554,   | 979516, | 2142.8208, |
| 5.366752 |         |            | 5.360871 |         |            | 5.354990 |         |            |
| 28479,   | 955200, | 2147.4653, | 28517,   | 966160, | 2145.1121, | 28555,   | 978694, | 2142.7589, |
| 5.366597 |         |            | 5.360716 |         |            | 5.354836 |         |            |
| 28480,   | 954308, | 2147.4034, | 28518,   | 965860, | 2145.0502, | 28556,   | 978694, | 2142.6970, |
| 5.366442 |         |            | 5.360562 |         |            | 5.354681 |         |            |
| 28481,   | 954218, | 2147.3415, | 28519,   | 966548, | 2144.9882, | 28557,   | 979820, | 2142.6350, |
| 5.366288 |         |            | 5.360407 |         |            | 5.354526 |         |            |
| 28482,   | 954618, | 2147.2795, | 28520,   | 967504, | 2144.9263, | 28558,   | 981020, | 2142.5731, |
| 5.366133 |         |            | 5.360252 |         |            | 5.354371 |         |            |
| 28483,   | 954800, | 2147.2176, | 28521,   | 967698, | 2144.8644, | 28559,   | 981034, | 2142.5112, |
| 5.365978 |         |            | 5.360097 |         |            | 5.354217 |         |            |
| 28484,   | 954640, | 2147.1557, | 28522,   | 967082, | 2144.8025, | 28560,   | 979788, | 2142.4492, |
| 5.365823 |         |            | 5.359943 |         |            | 5.354062 |         |            |
| 28485,   | 954768, | 2147.0938, | 28523,   | 966632, | 2144.7405, | 28561,   | 978458, | 2142.3873, |
| 5.365669 |         |            | 5.359788 |         |            | 5.353907 |         |            |
| 28486,   | 955684, | 2147.0318, | 28524,   | 967182, | 2144.6786, | 28562,   | 978216, | 2142.3254, |
| 5.365514 |         |            | 5.359633 |         |            | 5.353752 |         |            |
| 28487,   | 957028, | 2146.9699, | 28525,   | 968390, | 2144.6167, | 28563,   | 979060, | 2142.2635, |
| 5.365359 |         |            | 5.359478 |         |            | 5.353598 |         |            |
| 28488,   | 957886, | 2146.9080, | 28526,   | 969088, | 2144.5548, | 28564,   | 979984, | 2142.2015, |
| 5.365204 |         |            | 5.359324 |         |            | 5.353443 |         |            |
| 28489,   | 957880, | 2146.8461, | 28527,   | 968620, | 2144.4928, | 28565,   | 980158, | 2142.1396, |
| 5.365050 |         |            | 5.359169 |         |            | 5.353288 |         |            |
| 28490,   | 957658, | 2146.7841, | 28528,   | 967578, | 2144.4309, | 28566,   | 979750, | 2142.0777, |
| 5.364895 |         |            | 5.359014 |         |            | 5.353133 |         |            |
| 28491,   | 958170, | 2146.7222, | 28529,   | 967106, | 2144.3690, | 28567,   | 979510, | 2142.0158, |
| 5.364740 |         |            | 5.358859 |         |            | 5.352978 |         |            |
| 28492,   | 959536, | 2146.6603, | 28530,   | 967626, | 2144.3071, | 28568,   | 979816, | 2141.9538, |
| 5.364585 |         |            | 5.358705 |         |            | 5.352824 |         |            |
| 28493,   | 960840, | 2146.5983, | 28531,   | 968458, | 2144.2451, | 28569,   | 980320, | 2141.8919, |
| 5.364431 |         |            | 5.358550 |         |            | 5.352669 |         |            |
| 28494,   | 961132, | 2146.5364, | 28532,   | 968742, | 2144.1832, | 28570,   | 980542, | 2141.8300, |
| 5.364276 |         |            | 5.358395 |         |            | 5.352514 |         |            |
| 28495,   | 960470, | 2146.4745, | 28533,   | 968506, | 2144.1213, | 28571,   | 980546, | 2141.7681, |
| 5.364121 |         |            | 5.358240 |         |            | 5.352359 |         |            |
| 28496,   | 959834, | 2146.4126, | 28534,   | 968594, | 2144.0593, | 28572,   | 980836, | 2141.7061, |
| 5.363966 |         |            | 5.358086 |         |            | 5.352205 |         |            |
| 28497,   | 959982, | 2146.3506, | 28535,   | 969594, | 2143.9974, | 28573,   | 981634, | 2141.6442, |
| 5.363812 |         |            | 5.357931 |         |            | 5.352050 |         |            |
| 28498,   | 960684, | 2146.2887, | 28536,   | 971050, | 2143.9355, | 28574,   | 982504, | 2141.5823, |
| 5.363657 |         |            | 5.357776 |         |            | 5.351895 |         |            |
| 28499,   | 961140, | 2146.2268, | 28537,   | 971942, | 2143.8736, | 28575,   | 982870, | 2141.5203, |
| 5.363502 |         |            | 5.357621 |         |            | 5.351740 |         |            |
| 28500,   | 961010, | 2146.1649, | 28538,   | 971842, | 2143.8116, | 28576,   | 982748, | 2141.4584, |
| 5.363347 |         |            | 5.357466 |         |            | 5.351586 |         |            |
| 28501,   | 960782, | 2146.1029, | 28539,   | 971356, | 2143.7497, | 28577,   | 982726, | 2141.3965, |
| 5.363193 |         |            | 5.357312 |         |            | 5.351431 |         |            |
| 28502,   | 961040, | 2146.0410, | 28540,   | 971348, | 2143.6878, | 28578,   | 983212, | 2141.3346, |
| 5.363038 |         |            | 5.357157 |         |            | 5.351276 |         |            |
| 28503,   | 961608, | 2145.9791, | 28541,   | 971956, | 2143.6259, | 28579,   | 983870, | 2141.2726, |
| 5.362883 |         |            | 5.357002 |         |            | 5.351121 |         |            |
| 28504,   | 961722, | 2145.9172, | 28542,   | 972510, | 2143.5639, | 28580,   | 984012, | 2141.2107, |
| 5.362728 |         |            | 5.356847 |         |            | 5.350967 |         |            |
| 28505,   | 961044, | 2145.8552, | 28543,   | 972448, | 2143.5020, | 28581,   | 983506, | 2141.1488, |
| 5.362573 |         |            | 5.356693 |         |            | 5.350812 |         |            |
| 28506,   | 960292, | 2145.7933, | 28544,   | 972068, | 2143.4401, | 28582,   | 983086, | 2141.0869, |
| 5.362419 |         |            | 5.356538 |         |            | 5.350657 |         |            |
| 28507,   | 960560, | 2145.7314, | 28545,   | 972138, | 2143.3782, | 28583,   | 983518, | 2141.0249, |
| 5.362264 |         |            | 5.356383 |         |            | 5.350502 |         |            |
| 28508,   | 962044, | 2145.6694, | 28546,   | 972930, | 2143.3162, | 28584,   | 984660, | 2140.9630, |
| 5.362109 |         |            | 5.356228 |         |            | 5.350348 |         |            |

|          |         |            |          |          |            |          |          |            |
|----------|---------|------------|----------|----------|------------|----------|----------|------------|
| 28585,   | 985476, | 2140.9011, | 28623,   | 998936,  | 2138.5479, | 28661,   | 1009032, | 2136.1946, |
| 5.350193 |         |            | 5.344312 |          |            | 5.338431 |          |            |
| 28586,   | 985176, | 2140.8391, | 28624,   | 999622,  | 2138.4859, | 28662,   | 1010112, | 2136.1327, |
| 5.350038 |         |            | 5.344157 |          |            | 5.338277 |          |            |
| 28587,   | 984120, | 2140.7772, | 28625,   | 999606,  | 2138.4240, | 28663,   | 1010502, | 2136.0708, |
| 5.349883 |         |            | 5.344003 |          |            | 5.338122 |          |            |
| 28588,   | 983486, | 2140.7153, | 28626,   | 999748,  | 2138.3621, | 28664,   | 1010758, | 2136.0088, |
| 5.349729 |         |            | 5.343848 |          |            | 5.337967 |          |            |
| 28589,   | 984004, | 2140.6534, | 28627,   | 1000606, | 2138.3001, | 28665,   | 1011390, | 2135.9469, |
| 5.349574 |         |            | 5.343693 |          |            | 5.337812 |          |            |
| 28590,   | 985202, | 2140.5914, | 28628,   | 1001692, | 2138.2382, | 28666,   | 1012182, | 2135.8850, |
| 5.349419 |         |            | 5.343538 |          |            | 5.337657 |          |            |
| 28591,   | 986044, | 2140.5295, | 28629,   | 1002092, | 2138.1763, | 28667,   | 1012534, | 2135.8231, |
| 5.349264 |         |            | 5.343384 |          |            | 5.337503 |          |            |
| 28592,   | 986154, | 2140.4676, | 28630,   | 1001612, | 2138.1144, | 28668,   | 1012306, | 2135.7611, |
| 5.349110 |         |            | 5.343229 |          |            | 5.337348 |          |            |
| 28593,   | 986228, | 2140.4057, | 28631,   | 1001132, | 2138.0524, | 28669,   | 1012072, | 2135.6992, |
| 5.348955 |         |            | 5.343074 |          |            | 5.337193 |          |            |
| 28594,   | 987112, | 2140.3437, | 28632,   | 1001626, | 2137.9905, | 28670,   | 1012450, | 2135.6373, |
| 5.348800 |         |            | 5.342919 |          |            | 5.337038 |          |            |
| 28595,   | 988724, | 2140.2818, | 28633,   | 1003026, | 2137.9286, | 28671,   | 1013356, | 2135.5754, |
| 5.348645 |         |            | 5.342764 |          |            | 5.336884 |          |            |
| 28596,   | 990098, | 2140.2199, | 28634,   | 1004240, | 2137.8667, | 28672,   | 1014124, | 2135.5134, |
| 5.348491 |         |            | 5.342610 |          |            | 5.336729 |          |            |
| 28597,   | 990524, | 2140.1580, | 28635,   | 1004358, | 2137.8047, | 28673,   | 1014324, | 2135.4515, |
| 5.348336 |         |            | 5.342455 |          |            | 5.336574 |          |            |
| 28598,   | 990392, | 2140.0960, | 28636,   | 1003616, | 2137.7428, | 28674,   | 1014260, | 2135.3896, |
| 5.348181 |         |            | 5.342300 |          |            | 5.336419 |          |            |
| 28599,   | 990718, | 2140.0341, | 28637,   | 1003044, | 2137.6809, | 28675,   | 1014554, | 2135.3277, |
| 5.348026 |         |            | 5.342145 |          |            | 5.336265 |          |            |
| 28600,   | 991890, | 2139.9722, | 28638,   | 1003232, | 2137.6189, | 28676,   | 1015256, | 2135.2657, |
| 5.347871 |         |            | 5.341991 |          |            | 5.336110 |          |            |
| 28601,   | 993136, | 2139.9102, | 28639,   | 1003716, | 2137.5570, | 28677,   | 1015720, | 2135.2038, |
| 5.347717 |         |            | 5.341836 |          |            | 5.335955 |          |            |
| 28602,   | 993422, | 2139.8483, | 28640,   | 1003648, | 2137.4951, | 28678,   | 1015390, | 2135.1419, |
| 5.347562 |         |            | 5.341681 |          |            | 5.335800 |          |            |
| 28603,   | 992728, | 2139.7864, | 28641,   | 1002942, | 2137.4332, | 28679,   | 1014572, | 2135.0799, |
| 5.347407 |         |            | 5.341526 |          |            | 5.335646 |          |            |
| 28604,   | 992172, | 2139.7245, | 28642,   | 1002452, | 2137.3712, | 28680,   | 1014208, | 2135.0180, |
| 5.347252 |         |            | 5.341372 |          |            | 5.335491 |          |            |
| 28605,   | 992838, | 2139.6625, | 28643,   | 1002982, | 2137.3093, | 28681,   | 1014874, | 2134.9561, |
| 5.347098 |         |            | 5.341217 |          |            | 5.335336 |          |            |
| 28606,   | 994560, | 2139.6006, | 28644,   | 1004314, | 2137.2474, | 28682,   | 1016122, | 2134.8942, |
| 5.346943 |         |            | 5.341062 |          |            | 5.335181 |          |            |
| 28607,   | 996118, | 2139.5387, | 28645,   | 1005440, | 2137.1855, | 28683,   | 1017024, | 2134.8322, |
| 5.346788 |         |            | 5.340907 |          |            | 5.335027 |          |            |
| 28608,   | 996580, | 2139.4768, | 28646,   | 1005738, | 2137.1235, | 28684,   | 1017252, | 2134.7703, |
| 5.346633 |         |            | 5.340753 |          |            | 5.334872 |          |            |
| 28609,   | 996226, | 2139.4148, | 28647,   | 1005668, | 2137.0616, | 28685,   | 1017432, | 2134.7084, |
| 5.346479 |         |            | 5.340598 |          |            | 5.334717 |          |            |
| 28610,   | 996074, | 2139.3529, | 28648,   | 1006172, | 2136.9997, | 28686,   | 1018312, | 2134.6465, |
| 5.346324 |         |            | 5.340443 |          |            | 5.334562 |          |            |
| 28611,   | 996590, | 2139.2910, | 28649,   | 1007480, | 2136.9378, | 28687,   | 1019784, | 2134.5845, |
| 5.346169 |         |            | 5.340288 |          |            | 5.334408 |          |            |
| 28612,   | 997180, | 2139.2290, | 28650,   | 1008768, | 2136.8758, | 28688,   | 1020894, | 2134.5226, |
| 5.346014 |         |            | 5.340134 |          |            | 5.334253 |          |            |
| 28613,   | 996994, | 2139.1671, | 28651,   | 1009098, | 2136.8139, | 28689,   | 1020880, | 2134.4607, |
| 5.345860 |         |            | 5.339979 |          |            | 5.334098 |          |            |
| 28614,   | 996064, | 2139.1052, | 28652,   | 1008520, | 2136.7520, | 28690,   | 1020078, | 2134.3987, |
| 5.345705 |         |            | 5.339824 |          |            | 5.333943 |          |            |
| 28615,   | 995348, | 2139.0433, | 28653,   | 1008006, | 2136.6900, | 28691,   | 1019538, | 2134.3368, |
| 5.345550 |         |            | 5.339669 |          |            | 5.333789 |          |            |
| 28616,   | 995618, | 2138.9813, | 28654,   | 1008308, | 2136.6281, | 28692,   | 1019890, | 2134.2749, |
| 5.345395 |         |            | 5.339515 |          |            | 5.333634 |          |            |
| 28617,   | 996534, | 2138.9194, | 28655,   | 1009056, | 2136.5662, | 28693,   | 1020714, | 2134.2130, |
| 5.345241 |         |            | 5.339360 |          |            | 5.333479 |          |            |
| 28618,   | 997058, | 2138.8575, | 28656,   | 1009194, | 2136.5043, | 28694,   | 1021158, | 2134.1510, |
| 5.345086 |         |            | 5.339205 |          |            | 5.333324 |          |            |
| 28619,   | 996684, | 2138.7956, | 28657,   | 1008254, | 2136.4423, | 28695,   | 1021046, | 2134.0891, |
| 5.344931 |         |            | 5.339050 |          |            | 5.333170 |          |            |
| 28620,   | 996070, | 2138.7336, | 28658,   | 1006976, | 2136.3804, | 28696,   | 1021118, | 2134.0272, |
| 5.344776 |         |            | 5.338896 |          |            | 5.333015 |          |            |
| 28621,   | 996266, | 2138.6717, | 28659,   | 1006588, | 2136.3185, | 28697,   | 1022120, | 2133.9653, |
| 5.344622 |         |            | 5.338741 |          |            | 5.332860 |          |            |
| 28622,   | 997506, | 2138.6098, | 28660,   | 1007518, | 2136.2566, | 28698,   | 1023868, | 2133.9033, |
| 5.344467 |         |            | 5.338586 |          |            | 5.332705 |          |            |

|          |          |            |          |          |            |          |          |            |
|----------|----------|------------|----------|----------|------------|----------|----------|------------|
| 28699,   | 1025340, | 2133.8414, | 28737,   | 1036280, | 2131.4882, | 28775,   | 1054172, | 2129.1350, |
| 5.332550 |          |            | 5.326670 |          |            | 5.320789 |          |            |
| 28700,   | 1025766, | 2133.7795, | 28738,   | 1036488, | 2131.4263, | 28776,   | 1054370, | 2129.0730, |
| 5.332396 |          |            | 5.326515 |          |            | 5.320634 |          |            |
| 28701,   | 1025400, | 2133.7176, | 28739,   | 1036314, | 2131.3643, | 28777,   | 1054390, | 2129.0111, |
| 5.332241 |          |            | 5.326360 |          |            | 5.320479 |          |            |
| 28702,   | 1025116, | 2133.6556, | 28740,   | 1036708, | 2131.3024, | 28778,   | 1055244, | 2128.9492, |
| 5.332086 |          |            | 5.326205 |          |            | 5.320325 |          |            |
| 28703,   | 1025384, | 2133.5937, | 28741,   | 1037946, | 2131.2405, | 28779,   | 1056998, | 2128.8873, |
| 5.331931 |          |            | 5.326051 |          |            | 5.320170 |          |            |
| 28704,   | 1025824, | 2133.5318, | 28742,   | 1039384, | 2131.1786, | 28780,   | 1058682, | 2128.8253, |
| 5.331777 |          |            | 5.325896 |          |            | 5.320015 |          |            |
| 28705,   | 1025832, | 2133.4698, | 28743,   | 1040274, | 2131.1166, | 28781,   | 1059430, | 2128.7634, |
| 5.331622 |          |            | 5.325741 |          |            | 5.319860 |          |            |
| 28706,   | 1025442, | 2133.4079, | 28744,   | 1040656, | 2131.0547, | 28782,   | 1059470, | 2128.7015, |
| 5.331467 |          |            | 5.325586 |          |            | 5.319706 |          |            |
| 28707,   | 1025298, | 2133.3460, | 28745,   | 1041152, | 2130.9928, | 28783,   | 1059812, | 2128.6395, |
| 5.331312 |          |            | 5.325432 |          |            | 5.319551 |          |            |
| 28708,   | 1025814, | 2133.2841, | 28746,   | 1041998, | 2130.9308, | 28784,   | 1060976, | 2128.5776, |
| 5.331158 |          |            | 5.325277 |          |            | 5.319396 |          |            |
| 28709,   | 1026572, | 2133.2221, | 28747,   | 1042538, | 2130.8689, | 28785,   | 1062320, | 2128.5157, |
| 5.331003 |          |            | 5.325122 |          |            | 5.319241 |          |            |
| 28710,   | 1026798, | 2133.1602, | 28748,   | 1041976, | 2130.8070, | 28786,   | 1062736, | 2128.4538, |
| 5.330848 |          |            | 5.324967 |          |            | 5.319087 |          |            |
| 28711,   | 1026304, | 2133.0983, | 28749,   | 1040460, | 2130.7451, | 28787,   | 1061944, | 2128.3918, |
| 5.330693 |          |            | 5.324813 |          |            | 5.318932 |          |            |
| 28712,   | 1025820, | 2133.0364, | 28750,   | 1039194, | 2130.6831, | 28788,   | 1060804, | 2128.3299, |
| 5.330539 |          |            | 5.324658 |          |            | 5.318777 |          |            |
| 28713,   | 1026158, | 2132.9744, | 28751,   | 1039272, | 2130.6212, | 28789,   | 1060312, | 2128.2680, |
| 5.330384 |          |            | 5.324503 |          |            | 5.318622 |          |            |
| 28714,   | 1027266, | 2132.9125, | 28752,   | 1040582, | 2130.5593, | 28790,   | 1060462, | 2128.2061, |
| 5.330229 |          |            | 5.324348 |          |            | 5.318468 |          |            |
| 28715,   | 1028234, | 2132.8506, | 28753,   | 1041968, | 2130.4974, | 28791,   | 1060330, | 2128.1441, |
| 5.330074 |          |            | 5.324194 |          |            | 5.318313 |          |            |
| 28716,   | 1028332, | 2132.7886, | 28754,   | 1042556, | 2130.4354, | 28792,   | 1059206, | 2128.0822, |
| 5.329920 |          |            | 5.324039 |          |            | 5.318158 |          |            |
| 28717,   | 1027832, | 2132.7267, | 28755,   | 1042678, | 2130.3735, | 28793,   | 1057474, | 2128.0203, |
| 5.329765 |          |            | 5.323884 |          |            | 5.318003 |          |            |
| 28718,   | 1027658, | 2132.6648, | 28756,   | 1043342, | 2130.3116, | 28794,   | 1056176, | 2127.9584, |
| 5.329610 |          |            | 5.323729 |          |            | 5.317849 |          |            |
| 28719,   | 1028248, | 2132.6029, | 28757,   | 1044912, | 2130.2496, | 28795,   | 1055828, | 2127.8964, |
| 5.329455 |          |            | 5.323575 |          |            | 5.317694 |          |            |
| 28720,   | 1029044, | 2132.5409, | 28758,   | 1046572, | 2130.1877, | 28796,   | 1055938, | 2127.8345, |
| 5.329301 |          |            | 5.323420 |          |            | 5.317539 |          |            |
| 28721,   | 1029202, | 2132.4790, | 28759,   | 1047236, | 2130.1258, | 28797,   | 1055794, | 2127.7726, |
| 5.329146 |          |            | 5.323265 |          |            | 5.317384 |          |            |
| 28722,   | 1028672, | 2132.4171, | 28760,   | 1046806, | 2130.0639, | 28798,   | 1055424, | 2127.7106, |
| 5.328991 |          |            | 5.323110 |          |            | 5.317229 |          |            |
| 28723,   | 1028336, | 2132.3552, | 28761,   | 1046306, | 2130.0019, | 28799,   | 1055624, | 2127.6487, |
| 5.328836 |          |            | 5.322956 |          |            | 5.317075 |          |            |
| 28724,   | 1028974, | 2132.2932, | 28762,   | 1046716, | 2129.9400, | 28800,   | 1056886, | 2127.5868, |
| 5.328682 |          |            | 5.322801 |          |            | 5.316920 |          |            |
| 28725,   | 1030340, | 2132.2313, | 28763,   | 1047838, | 2129.8781, | 28801,   | 1058614, | 2127.5249, |
| 5.328527 |          |            | 5.322646 |          |            | 5.316765 |          |            |
| 28726,   | 1031400, | 2132.1694, | 28764,   | 1048578, | 2129.8162, | 28802,   | 1059654, | 2127.4629, |
| 5.328372 |          |            | 5.322491 |          |            | 5.316610 |          |            |
| 28727,   | 1031526, | 2132.1075, | 28765,   | 1048258, | 2129.7542, | 28803,   | 1059482, | 2127.4010, |
| 5.328217 |          |            | 5.322336 |          |            | 5.316456 |          |            |
| 28728,   | 1031244, | 2132.0455, | 28766,   | 1047422, | 2129.6923, | 28804,   | 1058766, | 2127.3391, |
| 5.328063 |          |            | 5.322182 |          |            | 5.316301 |          |            |
| 28729,   | 1031578, | 2131.9836, | 28767,   | 1047212, | 2129.6304, | 28805,   | 1058584, | 2127.2772, |
| 5.327908 |          |            | 5.322027 |          |            | 5.316146 |          |            |
| 28730,   | 1032812, | 2131.9217, | 28768,   | 1048046, | 2129.5685, | 28806,   | 1059206, | 2127.2152, |
| 5.327753 |          |            | 5.321872 |          |            | 5.315991 |          |            |
| 28731,   | 1034116, | 2131.8597, | 28769,   | 1049218, | 2129.5065, | 28807,   | 1059926, | 2127.1533, |
| 5.327598 |          |            | 5.321717 |          |            | 5.315837 |          |            |
| 28732,   | 1034476, | 2131.7978, | 28770,   | 1049812, | 2129.4446, | 28808,   | 1060074, | 2127.0914, |
| 5.327443 |          |            | 5.321563 |          |            | 5.315682 |          |            |
| 28733,   | 1033894, | 2131.7359, | 28771,   | 1049826, | 2129.3827, | 28809,   | 1059928, | 2127.0294, |
| 5.327289 |          |            | 5.321408 |          |            | 5.315527 |          |            |
| 28734,   | 1033406, | 2131.6740, | 28772,   | 1050128, | 2129.3207, | 28810,   | 1060454, | 2126.9675, |
| 5.327134 |          |            | 5.321253 |          |            | 5.315372 |          |            |
| 28735,   | 1033922, | 2131.6120, | 28773,   | 1051348, | 2129.2588, | 28811,   | 1062102, | 2126.9056, |
| 5.326979 |          |            | 5.321098 |          |            | 5.315218 |          |            |
| 28736,   | 1035220, | 2131.5501, | 28774,   | 1053044, | 2129.1969, | 28812,   | 1064186, | 2126.8437, |
| 5.326824 |          |            | 5.320944 |          |            | 5.315063 |          |            |



|          |          |            |          |          |            |          |          |            |
|----------|----------|------------|----------|----------|------------|----------|----------|------------|
| 28813,   | 1065594, | 2126.7817, | 28851,   | 1080944, | 2124.4285, | 28889,   | 1097520, | 2122.0753, |
| 5.314908 |          |            | 5.309027 |          |            | 5.303147 |          |            |
| 28814,   | 1065992, | 2126.7198, | 28852,   | 1080724, | 2124.3666, | 28890,   | 1096956, | 2122.0134, |
| 5.314753 |          |            | 5.308873 |          |            | 5.302992 |          |            |
| 28815,   | 1066116, | 2126.6579, | 28853,   | 1080580, | 2124.3047, | 28891,   | 1096518, | 2121.9514, |
| 5.314599 |          |            | 5.308718 |          |            | 5.302837 |          |            |
| 28816,   | 1066790, | 2126.5960, | 28854,   | 1081284, | 2124.2427, | 28892,   | 1096938, | 2121.8895, |
| 5.314444 |          |            | 5.308563 |          |            | 5.302682 |          |            |
| 28817,   | 1067874, | 2126.5340, | 28855,   | 1082634, | 2124.1808, | 28893,   | 1097898, | 2121.8276, |
| 5.314289 |          |            | 5.308408 |          |            | 5.302527 |          |            |
| 28818,   | 1068482, | 2126.4721, | 28856,   | 1083630, | 2124.1189, | 28894,   | 1098378, | 2121.7657, |
| 5.314134 |          |            | 5.308254 |          |            | 5.302373 |          |            |
| 28819,   | 1068154, | 2126.4102, | 28857,   | 1083648, | 2124.0570, | 28895,   | 1097846, | 2121.7037, |
| 5.313980 |          |            | 5.308099 |          |            | 5.302218 |          |            |
| 28820,   | 1067584, | 2126.3483, | 28858,   | 1083208, | 2123.9950, | 28896,   | 1096888, | 2121.6418, |
| 5.313825 |          |            | 5.307944 |          |            | 5.302063 |          |            |
| 28821,   | 1067926, | 2126.2863, | 28859,   | 1083380, | 2123.9331, | 28897,   | 1096546, | 2121.5799, |
| 5.313670 |          |            | 5.307789 |          |            | 5.301908 |          |            |
| 28822,   | 1069430, | 2126.2244, | 28860,   | 1084524, | 2123.8712, | 28898,   | 1097112, | 2121.5180, |
| 5.313515 |          |            | 5.307634 |          |            | 5.301754 |          |            |
| 28823,   | 1071030, | 2126.1625, | 28861,   | 1085890, | 2123.8092, | 28899,   | 1097898, | 2121.4560, |
| 5.313361 |          |            | 5.307480 |          |            | 5.301599 |          |            |
| 28824,   | 1071456, | 2126.1005, | 28862,   | 1086528, | 2123.7473, | 28900,   | 1098134, | 2121.3941, |
| 5.313206 |          |            | 5.307325 |          |            | 5.301444 |          |            |
| 28825,   | 1070598, | 2126.0386, | 28863,   | 1086390, | 2123.6854, | 28901,   | 1097924, | 2121.3322, |
| 5.313051 |          |            | 5.307170 |          |            | 5.301289 |          |            |
| 28826,   | 1069582, | 2125.9767, | 28864,   | 1086334, | 2123.6235, | 28902,   | 1098010, | 2121.2702, |
| 5.312896 |          |            | 5.307015 |          |            | 5.301135 |          |            |
| 28827,   | 1069480, | 2125.9148, | 28865,   | 1086988, | 2123.5615, | 28903,   | 1098712, | 2121.2083, |
| 5.312742 |          |            | 5.306861 |          |            | 5.300980 |          |            |
| 28828,   | 1070176, | 2125.8528, | 28866,   | 1087922, | 2123.4996, | 28904,   | 1099352, | 2121.1464, |
| 5.312587 |          |            | 5.306706 |          |            | 5.300825 |          |            |
| 28829,   | 1070666, | 2125.7909, | 28867,   | 1088178, | 2123.4377, | 28905,   | 1099038, | 2121.0845, |
| 5.312432 |          |            | 5.306551 |          |            | 5.300670 |          |            |
| 28830,   | 1070418, | 2125.7290, | 28868,   | 1087524, | 2123.3758, | 28906,   | 1097870, | 2121.0225, |
| 5.312277 |          |            | 5.306396 |          |            | 5.300516 |          |            |
| 28831,   | 1070124, | 2125.6671, | 28869,   | 1086872, | 2123.3138, | 28907,   | 1097104, | 2120.9606, |
| 5.312122 |          |            | 5.306242 |          |            | 5.300361 |          |            |
| 28832,   | 1070878, | 2125.6051, | 28870,   | 1087308, | 2123.2519, | 28908,   | 1097926, | 2120.8987, |
| 5.311968 |          |            | 5.306087 |          |            | 5.300206 |          |            |
| 28833,   | 1072834, | 2125.5432, | 28871,   | 1088778, | 2123.1900, | 28909,   | 1100154, | 2120.8368, |
| 5.311813 |          |            | 5.305932 |          |            | 5.300051 |          |            |
| 28834,   | 1074886, | 2125.4813, | 28872,   | 1090050, | 2123.1281, | 28910,   | 1102350, | 2120.7748, |
| 5.311658 |          |            | 5.305777 |          |            | 5.299897 |          |            |
| 28835,   | 1075820, | 2125.4193, | 28873,   | 1090050, | 2123.0661, | 28911,   | 1103290, | 2120.7129, |
| 5.311503 |          |            | 5.305623 |          |            | 5.299742 |          |            |
| 28836,   | 1075612, | 2125.3574, | 28874,   | 1089084, | 2123.0042, | 28912,   | 1103158, | 2120.6510, |
| 5.311349 |          |            | 5.305468 |          |            | 5.299587 |          |            |
| 28837,   | 1075364, | 2125.2955, | 28875,   | 1088506, | 2122.9423, | 28913,   | 1103140, | 2120.5890, |
| 5.311194 |          |            | 5.305313 |          |            | 5.299432 |          |            |
| 28838,   | 1075994, | 2125.2336, | 28876,   | 1089234, | 2122.8803, | 28914,   | 1103988, | 2120.5271, |
| 5.311039 |          |            | 5.305158 |          |            | 5.299278 |          |            |
| 28839,   | 1077218, | 2125.1716, | 28877,   | 1090724, | 2122.8184, | 28915,   | 1105208, | 2120.4652, |
| 5.310884 |          |            | 5.305004 |          |            | 5.299123 |          |            |
| 28840,   | 1078020, | 2125.1097, | 28878,   | 1091634, | 2122.7565, | 28916,   | 1105744, | 2120.4033, |
| 5.310730 |          |            | 5.304849 |          |            | 5.298968 |          |            |
| 28841,   | 1077970, | 2125.0478, | 28879,   | 1091342, | 2122.6946, | 28917,   | 1105256, | 2120.3413, |
| 5.310575 |          |            | 5.304694 |          |            | 5.298813 |          |            |
| 28842,   | 1077782, | 2124.9859, | 28880,   | 1090586, | 2122.6326, | 28918,   | 1104466, | 2120.2794, |
| 5.310420 |          |            | 5.304539 |          |            | 5.298659 |          |            |
| 28843,   | 1078450, | 2124.9239, | 28881,   | 1090590, | 2122.5707, | 28919,   | 1104206, | 2120.2175, |
| 5.310265 |          |            | 5.304385 |          |            | 5.298504 |          |            |
| 28844,   | 1079966, | 2124.8620, | 28882,   | 1091706, | 2122.5088, | 28920,   | 1104436, | 2120.1556, |
| 5.310111 |          |            | 5.304230 |          |            | 5.298349 |          |            |
| 28845,   | 1081232, | 2124.8001, | 28883,   | 1093166, | 2122.4469, | 28921,   | 1104382, | 2120.0936, |
| 5.309956 |          |            | 5.304075 |          |            | 5.298194 |          |            |
| 28846,   | 1081280, | 2124.7382, | 28884,   | 1094104, | 2122.3849, | 28922,   | 1103664, | 2120.0317, |
| 5.309801 |          |            | 5.303920 |          |            | 5.298040 |          |            |
| 28847,   | 1080332, | 2124.6762, | 28885,   | 1094534, | 2122.3230, | 28923,   | 1102906, | 2119.9698, |
| 5.309646 |          |            | 5.303766 |          |            | 5.297885 |          |            |
| 28848,   | 1079560, | 2124.6143, | 28886,   | 1095148, | 2122.2611, | 28924,   | 1103048, | 2119.9079, |
| 5.309492 |          |            | 5.303611 |          |            | 5.297730 |          |            |
| 28849,   | 1079756, | 2124.5524, | 28887,   | 1096256, | 2122.1991, | 28925,   | 1104152, | 2119.8459, |
| 5.309337 |          |            | 5.303456 |          |            | 5.297575 |          |            |
| 28850,   | 1080528, | 2124.4904, | 28888,   | 1097300, | 2122.1372, | 28926,   | 1105234, | 2119.7840, |
| 5.309182 |          |            | 5.303301 |          |            | 5.297420 |          |            |

|          |          |            |          |          |            |          |          |            |
|----------|----------|------------|----------|----------|------------|----------|----------|------------|
| 28927,   | 1105342, | 2119.7221, | 28965,   | 1123888, | 2117.3689, | 29003,   | 1137468, | 2115.0156, |
| 5.297266 |          |            | 5.291385 |          |            | 5.285504 |          |            |
| 28928,   | 1104722, | 2119.6601, | 28966,   | 1124358, | 2117.3069, | 29004,   | 1136562, | 2114.9537, |
| 5.297111 |          |            | 5.291230 |          |            | 5.285349 |          |            |
| 28929,   | 1104596, | 2119.5982, | 28967,   | 1125184, | 2117.2450, | 29005,   | 1136418, | 2114.8918, |
| 5.296956 |          |            | 5.291075 |          |            | 5.285195 |          |            |
| 28930,   | 1105804, | 2119.5363, | 28968,   | 1126666, | 2117.1831, | 29006,   | 1137730, | 2114.8298, |
| 5.296801 |          |            | 5.290921 |          |            | 5.285040 |          |            |
| 28931,   | 1107846, | 2119.4744, | 28969,   | 1128066, | 2117.1211, | 29007,   | 1139830, | 2114.7679, |
| 5.296647 |          |            | 5.290766 |          |            | 5.284885 |          |            |
| 28932,   | 1109482, | 2119.4124, | 28970,   | 1128392, | 2117.0592, | 29008,   | 1141416, | 2114.7060, |
| 5.296492 |          |            | 5.290611 |          |            | 5.284730 |          |            |
| 28933,   | 1110140, | 2119.3505, | 28971,   | 1127604, | 2116.9973, | 29009,   | 1141960, | 2114.6441, |
| 5.296337 |          |            | 5.290456 |          |            | 5.284576 |          |            |
| 28934,   | 1110488, | 2119.2886, | 28972,   | 1126838, | 2116.9354, | 29010,   | 1142160, | 2114.5821, |
| 5.296182 |          |            | 5.290302 |          |            | 5.284421 |          |            |
| 28935,   | 1111494, | 2119.2267, | 28973,   | 1127208, | 2116.8734, | 29011,   | 1142984, | 2114.5202, |
| 5.296028 |          |            | 5.290147 |          |            | 5.284266 |          |            |
| 28936,   | 1113134, | 2119.1647, | 28974,   | 1128594, | 2116.8115, | 29012,   | 1144460, | 2114.4583, |
| 5.295873 |          |            | 5.289992 |          |            | 5.284111 |          |            |
| 28937,   | 1114282, | 2119.1028, | 28975,   | 1129768, | 2116.7496, | 29013,   | 1145664, | 2114.3964, |
| 5.295718 |          |            | 5.289837 |          |            | 5.283957 |          |            |
| 28938,   | 1114040, | 2119.0409, | 28976,   | 1129788, | 2116.6877, | 29014,   | 1145860, | 2114.3344, |
| 5.295563 |          |            | 5.289683 |          |            | 5.283802 |          |            |
| 28939,   | 1112858, | 2118.9789, | 28977,   | 1129028, | 2116.6257, | 29015,   | 1145370, | 2114.2725, |
| 5.295409 |          |            | 5.289528 |          |            | 5.283647 |          |            |
| 28940,   | 1112146, | 2118.9170, | 28978,   | 1128664, | 2116.5638, | 29016,   | 1145182, | 2114.2106, |
| 5.295254 |          |            | 5.289373 |          |            | 5.283492 |          |            |
| 28941,   | 1112778, | 2118.8551, | 28979,   | 1129278, | 2116.5019, | 29017,   | 1145772, | 2114.1487, |
| 5.295099 |          |            | 5.289218 |          |            | 5.283338 |          |            |
| 28942,   | 1114162, | 2118.7932, | 28980,   | 1130214, | 2116.4399, | 29018,   | 1146570, | 2114.0867, |
| 5.294944 |          |            | 5.289064 |          |            | 5.283183 |          |            |
| 28943,   | 1115004, | 2118.7312, | 28981,   | 1130418, | 2116.3780, | 29019,   | 1146728, | 2114.0248, |
| 5.294790 |          |            | 5.288909 |          |            | 5.283028 |          |            |
| 28944,   | 1114774, | 2118.6693, | 28982,   | 1129774, | 2116.3161, | 29020,   | 1146206, | 2113.9629, |
| 5.294635 |          |            | 5.288754 |          |            | 5.282873 |          |            |
| 28945,   | 1114284, | 2118.6074, | 28983,   | 1129298, | 2116.2542, | 29021,   | 1145852, | 2113.9009, |
| 5.294480 |          |            | 5.288599 |          |            | 5.282719 |          |            |
| 28946,   | 1114664, | 2118.5455, | 28984,   | 1129944, | 2116.1922, | 29022,   | 1146384, | 2113.8390, |
| 5.294325 |          |            | 5.288445 |          |            | 5.282564 |          |            |
| 28947,   | 1116024, | 2118.4835, | 28985,   | 1131474, | 2116.1303, | 29023,   | 1147520, | 2113.7771, |
| 5.294171 |          |            | 5.288290 |          |            | 5.282409 |          |            |
| 28948,   | 1117328, | 2118.4216, | 28986,   | 1132702, | 2116.0684, | 29024,   | 1148314, | 2113.7152, |
| 5.294016 |          |            | 5.288135 |          |            | 5.282254 |          |            |
| 28949,   | 1117592, | 2118.3597, | 28987,   | 1132868, | 2116.0065, | 29025,   | 1148274, | 2113.6532, |
| 5.293861 |          |            | 5.287980 |          |            | 5.282099 |          |            |
| 28950,   | 1116940, | 2118.2978, | 28988,   | 1132488, | 2115.9445, | 29026,   | 1147930, | 2113.5913, |
| 5.293706 |          |            | 5.287826 |          |            | 5.281945 |          |            |
| 28951,   | 1116352, | 2118.2358, | 28989,   | 1132690, | 2115.8826, | 29027,   | 1148150, | 2113.5294, |
| 5.293552 |          |            | 5.287671 |          |            | 5.281790 |          |            |
| 28952,   | 1116478, | 2118.1739, | 28990,   | 1133886, | 2115.8207, | 29028,   | 1149060, | 2113.4675, |
| 5.293397 |          |            | 5.287516 |          |            | 5.281635 |          |            |
| 28953,   | 1116984, | 2118.1120, | 28991,   | 1135296, | 2115.7588, | 29029,   | 1149910, | 2113.4055, |
| 5.293242 |          |            | 5.287361 |          |            | 5.281480 |          |            |
| 28954,   | 1117188, | 2118.0500, | 28992,   | 1135900, | 2115.6968, | 29030,   | 1150024, | 2113.3436, |
| 5.293087 |          |            | 5.287206 |          |            | 5.281326 |          |            |
| 28955,   | 1117068, | 2117.9881, | 28993,   | 1135644, | 2115.6349, | 29031,   | 1149678, | 2113.2817, |
| 5.292933 |          |            | 5.287052 |          |            | 5.281171 |          |            |
| 28956,   | 1117356, | 2117.9262, | 28994,   | 1135444, | 2115.5730, | 29032,   | 1149806, | 2113.2197, |
| 5.292778 |          |            | 5.286897 |          |            | 5.281016 |          |            |
| 28957,   | 1118574, | 2117.8643, | 28995,   | 1136032, | 2115.5110, | 29033,   | 1150880, | 2113.1578, |
| 5.292623 |          |            | 5.286742 |          |            | 5.280861 |          |            |
| 28958,   | 1120234, | 2117.8023, | 28996,   | 1137058, | 2115.4491, | 29034,   | 1152278, | 2113.0959, |
| 5.292468 |          |            | 5.286587 |          |            | 5.280707 |          |            |
| 28959,   | 1121246, | 2117.7404, | 28997,   | 1137540, | 2115.3872, | 29035,   | 1152986, | 2113.0340, |
| 5.292313 |          |            | 5.286433 |          |            | 5.280552 |          |            |
| 28960,   | 1121110, | 2117.6785, | 28998,   | 1137080, | 2115.3253, | 29036,   | 1152748, | 2112.9720, |
| 5.292159 |          |            | 5.286278 |          |            | 5.280397 |          |            |
| 28961,   | 1120526, | 2117.6166, | 28999,   | 1136400, | 2115.2633, | 29037,   | 1152368, | 2112.9101, |
| 5.292004 |          |            | 5.286123 |          |            | 5.280242 |          |            |
| 28962,   | 1120606, | 2117.5546, | 29000,   | 1136456, | 2115.2014, | 29038,   | 1152754, | 2112.8482, |
| 5.291849 |          |            | 5.285968 |          |            | 5.280088 |          |            |
| 28963,   | 1121672, | 2117.4927, | 29001,   | 1137262, | 2115.1395, | 29039,   | 1153888, | 2112.7863, |
| 5.291694 |          |            | 5.285814 |          |            | 5.279933 |          |            |
| 28964,   | 1123028, | 2117.4308, | 29002,   | 1137854, | 2115.0776, | 29040,   | 1154952, | 2112.7243, |
| 5.291540 |          |            | 5.285659 |          |            | 5.279778 |          |            |

|          |          |            |          |          |            |          |          |            |
|----------|----------|------------|----------|----------|------------|----------|----------|------------|
| 29041,   | 1155366, | 2112.6624, | 29079,   | 1174604, | 2110.3092, | 29117,   | 1190974, | 2107.9560, |
| 5.279623 |          |            | 5.273743 |          |            | 5.267862 |          |            |
| 29042,   | 1155492, | 2112.6005, | 29080,   | 1174838, | 2110.2473, | 29118,   | 1189858, | 2107.8940, |
| 5.279469 |          |            | 5.273588 |          |            | 5.267707 |          |            |
| 29043,   | 1156118, | 2112.5386, | 29081,   | 1175856, | 2110.1853, | 29119,   | 1189570, | 2107.8321, |
| 5.279314 |          |            | 5.273433 |          |            | 5.267552 |          |            |
| 29044,   | 1157366, | 2112.4766, | 29082,   | 1177838, | 2110.1234, | 29120,   | 1190550, | 2107.7702, |
| 5.279159 |          |            | 5.273278 |          |            | 5.267398 |          |            |
| 29045,   | 1158432, | 2112.4147, | 29083,   | 1179756, | 2110.0615, | 29121,   | 1191930, | 2107.7083, |
| 5.279004 |          |            | 5.273124 |          |            | 5.267243 |          |            |
| 29046,   | 1158534, | 2112.3528, | 29084,   | 1180448, | 2109.9995, | 29122,   | 1192628, | 2107.6463, |
| 5.278850 |          |            | 5.272969 |          |            | 5.267088 |          |            |
| 29047,   | 1157942, | 2112.2908, | 29085,   | 1179876, | 2109.9376, | 29123,   | 1192608, | 2107.5844, |
| 5.278695 |          |            | 5.272814 |          |            | 5.266933 |          |            |
| 29048,   | 1157766, | 2112.2289, | 29086,   | 1179102, | 2109.8757, | 29124,   | 1192830, | 2107.5225, |
| 5.278540 |          |            | 5.272659 |          |            | 5.266778 |          |            |
| 29049,   | 1158688, | 2112.1670, | 29087,   | 1179030, | 2109.8138, | 29125,   | 1193992, | 2107.4605, |
| 5.278385 |          |            | 5.272505 |          |            | 5.266624 |          |            |
| 29050,   | 1160118, | 2112.1051, | 29088,   | 1179424, | 2109.7518, | 29126,   | 1195620, | 2107.3986, |
| 5.278231 |          |            | 5.272350 |          |            | 5.266469 |          |            |
| 29051,   | 1160790, | 2112.0431, | 29089,   | 1179350, | 2109.6899, | 29127,   | 1196660, | 2107.3367, |
| 5.278076 |          |            | 5.272195 |          |            | 5.266314 |          |            |
| 29052,   | 1160234, | 2111.9812, | 29090,   | 1178494, | 2109.6280, | 29128,   | 1196752, | 2107.2748, |
| 5.277921 |          |            | 5.272040 |          |            | 5.266159 |          |            |
| 29053,   | 1159344, | 2111.9193, | 29091,   | 1177662, | 2109.5661, | 29129,   | 1196736, | 2107.2128, |
| 5.277766 |          |            | 5.271885 |          |            | 5.266005 |          |            |
| 29054,   | 1159468, | 2111.8574, | 29092,   | 1177906, | 2109.5041, | 29130,   | 1197680, | 2107.1509, |
| 5.277612 |          |            | 5.271731 |          |            | 5.265850 |          |            |
| 29055,   | 1160940, | 2111.7954, | 29093,   | 1179260, | 2109.4422, | 29131,   | 1199644, | 2107.0890, |
| 5.277457 |          |            | 5.271576 |          |            | 5.265695 |          |            |
| 29056,   | 1162792, | 2111.7335, | 29094,   | 1180644, | 2109.3803, | 29132,   | 1201596, | 2107.0271, |
| 5.277302 |          |            | 5.271421 |          |            | 5.265540 |          |            |
| 29057,   | 1163880, | 2111.6716, | 29095,   | 1181060, | 2109.3184, | 29133,   | 1202580, | 2106.9651, |
| 5.277147 |          |            | 5.271266 |          |            | 5.265386 |          |            |
| 29058,   | 1164096, | 2111.6096, | 29096,   | 1180666, | 2109.2564, | 29134,   | 1202710, | 2106.9032, |
| 5.276992 |          |            | 5.271112 |          |            | 5.265231 |          |            |
| 29059,   | 1164262, | 2111.5477, | 29097,   | 1180506, | 2109.1945, | 29135,   | 1202860, | 2106.8413, |
| 5.276838 |          |            | 5.270957 |          |            | 5.265076 |          |            |
| 29060,   | 1165002, | 2111.4858, | 29098,   | 1181238, | 2109.1326, | 29136,   | 1203494, | 2106.7793, |
| 5.276683 |          |            | 5.270802 |          |            | 5.264921 |          |            |
| 29061,   | 1165952, | 2111.4239, | 29099,   | 1182420, | 2109.0706, | 29137,   | 1204130, | 2106.7174, |
| 5.276528 |          |            | 5.270647 |          |            | 5.264767 |          |            |
| 29062,   | 1166302, | 2111.3619, | 29100,   | 1183152, | 2109.0087, | 29138,   | 1204056, | 2106.6555, |
| 5.276373 |          |            | 5.270493 |          |            | 5.264612 |          |            |
| 29063,   | 1165940, | 2111.3000, | 29101,   | 1183254, | 2108.9468, | 29139,   | 1203390, | 2106.5936, |
| 5.276219 |          |            | 5.270338 |          |            | 5.264457 |          |            |
| 29064,   | 1165694, | 2111.2381, | 29102,   | 1183502, | 2108.8849, | 29140,   | 1203102, | 2106.5316, |
| 5.276064 |          |            | 5.270183 |          |            | 5.264302 |          |            |
| 29065,   | 1166340, | 2111.1762, | 29103,   | 1184612, | 2108.8229, | 29141,   | 1203852, | 2106.4697, |
| 5.275909 |          |            | 5.270028 |          |            | 5.264148 |          |            |
| 29066,   | 1167580, | 2111.1142, | 29104,   | 1186294, | 2108.7610, | 29142,   | 1205128, | 2106.4078, |
| 5.275754 |          |            | 5.269874 |          |            | 5.263993 |          |            |
| 29067,   | 1168284, | 2111.0523, | 29105,   | 1187552, | 2108.6991, | 29143,   | 1205698, | 2106.3459, |
| 5.275600 |          |            | 5.269719 |          |            | 5.263838 |          |            |
| 29068,   | 1167844, | 2110.9904, | 29106,   | 1187914, | 2108.6372, | 29144,   | 1204984, | 2106.2839, |
| 5.275445 |          |            | 5.269564 |          |            | 5.263683 |          |            |
| 29069,   | 1166982, | 2110.9285, | 29107,   | 1188076, | 2108.5752, | 29145,   | 1203746, | 2106.2220, |
| 5.275290 |          |            | 5.269409 |          |            | 5.263529 |          |            |
| 29070,   | 1167038, | 2110.8665, | 29108,   | 1189074, | 2108.5133, | 29146,   | 1203250, | 2106.1601, |
| 5.275135 |          |            | 5.269255 |          |            | 5.263374 |          |            |
| 29071,   | 1168498, | 2110.8046, | 29109,   | 1190938, | 2108.4514, | 29147,   | 1203846, | 2106.0982, |
| 5.274981 |          |            | 5.269100 |          |            | 5.263219 |          |            |
| 29072,   | 1170388, | 2110.7427, | 29110,   | 1192464, | 2108.3894, | 29148,   | 1204688, | 2106.0362, |
| 5.274826 |          |            | 5.268945 |          |            | 5.263064 |          |            |
| 29073,   | 1171368, | 2110.6807, | 29111,   | 1192468, | 2108.3275, | 29149,   | 1204782, | 2105.9743, |
| 5.274671 |          |            | 5.268790 |          |            | 5.262910 |          |            |
| 29074,   | 1171166, | 2110.6188, | 29112,   | 1191154, | 2108.2656, | 29150,   | 1204234, | 2105.9124, |
| 5.274516 |          |            | 5.268636 |          |            | 5.262755 |          |            |
| 29075,   | 1170808, | 2110.5569, | 29113,   | 1189960, | 2108.2037, | 29151,   | 1204088, | 2105.8504, |
| 5.274362 |          |            | 5.268481 |          |            | 5.262600 |          |            |
| 29076,   | 1171388, | 2110.4950, | 29114,   | 1190042, | 2108.1417, | 29152,   | 1205096, | 2105.7885, |
| 5.274207 |          |            | 5.268326 |          |            | 5.262445 |          |            |
| 29077,   | 1172832, | 2110.4330, | 29115,   | 1191040, | 2108.0798, | 29153,   | 1206800, | 2105.7266, |
| 5.274052 |          |            | 5.268171 |          |            | 5.262290 |          |            |
| 29078,   | 1174118, | 2110.3711, | 29116,   | 1191604, | 2108.0179, | 29154,   | 1208088, | 2105.6647, |
| 5.273897 |          |            | 5.268017 |          |            | 5.262136 |          |            |

|          |          |            |          |          |            |          |          |            |
|----------|----------|------------|----------|----------|------------|----------|----------|------------|
| 29155,   | 1208492, | 2105.6027, | 29193,   | 1224118, | 2103.2495, | 29231,   | 1244906, | 2100.8963, |
| 5.261981 |          |            | 5.256100 |          |            | 5.250219 |          |            |
| 29156,   | 1208716, | 2105.5408, | 29194,   | 1223860, | 2103.1876, | 29232,   | 1244356, | 2100.8344, |
| 5.261826 |          |            | 5.255945 |          |            | 5.250065 |          |            |
| 29157,   | 1209674, | 2105.4789, | 29195,   | 1224234, | 2103.1257, | 29233,   | 1245222, | 2100.7724, |
| 5.261671 |          |            | 5.255791 |          |            | 5.249910 |          |            |
| 29158,   | 1211328, | 2105.4170, | 29196,   | 1225326, | 2103.0637, | 29234,   | 1247044, | 2100.7105, |
| 5.261517 |          |            | 5.255636 |          |            | 5.249755 |          |            |
| 29159,   | 1212628, | 2105.3550, | 29197,   | 1226364, | 2103.0018, | 29235,   | 1248408, | 2100.6486, |
| 5.261362 |          |            | 5.255481 |          |            | 5.249600 |          |            |
| 29160,   | 1212730, | 2105.2931, | 29198,   | 1226776, | 2102.9399, | 29236,   | 1248524, | 2100.5867, |
| 5.261207 |          |            | 5.255326 |          |            | 5.249446 |          |            |
| 29161,   | 1211978, | 2105.2312, | 29199,   | 1226944, | 2102.8780, | 29237,   | 1248058, | 2100.5247, |
| 5.261052 |          |            | 5.255172 |          |            | 5.249291 |          |            |
| 29162,   | 1211504, | 2105.1692, | 29200,   | 1227736, | 2102.8160, | 29238,   | 1248270, | 2100.4628, |
| 5.260898 |          |            | 5.255017 |          |            | 5.249136 |          |            |
| 29163,   | 1211918, | 2105.1073, | 29201,   | 1229332, | 2102.7541, | 29239,   | 1249492, | 2100.4009, |
| 5.260743 |          |            | 5.254862 |          |            | 5.248981 |          |            |
| 29164,   | 1212658, | 2105.0454, | 29202,   | 1230842, | 2102.6922, | 29240,   | 1250750, | 2100.3390, |
| 5.260588 |          |            | 5.254707 |          |            | 5.248827 |          |            |
| 29165,   | 1212756, | 2104.9835, | 29203,   | 1231280, | 2102.6302, | 29241,   | 1250984, | 2100.2770, |
| 5.260433 |          |            | 5.254553 |          |            | 5.248672 |          |            |
| 29166,   | 1212090, | 2104.9215, | 29204,   | 1230736, | 2102.5683, | 29242,   | 1250334, | 2100.2151, |
| 5.260279 |          |            | 5.254398 |          |            | 5.248517 |          |            |
| 29167,   | 1211570, | 2104.8596, | 29205,   | 1230416, | 2102.5064, | 29243,   | 1250020, | 2100.1532, |
| 5.260124 |          |            | 5.254243 |          |            | 5.248362 |          |            |
| 29168,   | 1212056, | 2104.7977, | 29206,   | 1231338, | 2102.4445, | 29244,   | 1250942, | 2100.0912, |
| 5.259969 |          |            | 5.254088 |          |            | 5.248208 |          |            |
| 29169,   | 1213318, | 2104.7358, | 29207,   | 1233252, | 2102.3825, | 29245,   | 1252648, | 2100.0293, |
| 5.259814 |          |            | 5.253934 |          |            | 5.248053 |          |            |
| 29170,   | 1214288, | 2104.6738, | 29208,   | 1234902, | 2102.3206, | 29246,   | 1253872, | 2099.9674, |
| 5.259660 |          |            | 5.253779 |          |            | 5.247898 |          |            |
| 29171,   | 1214334, | 2104.6119, | 29209,   | 1235392, | 2102.2587, | 29247,   | 1253984, | 2099.9055, |
| 5.259505 |          |            | 5.253624 |          |            | 5.247743 |          |            |
| 29172,   | 1213956, | 2104.5500, | 29210,   | 1235026, | 2102.1968, | 29248,   | 1253624, | 2099.8435, |
| 5.259350 |          |            | 5.253469 |          |            | 5.247589 |          |            |
| 29173,   | 1214106, | 2104.4881, | 29211,   | 1234786, | 2102.1348, | 29249,   | 1253830, | 2099.7816, |
| 5.259195 |          |            | 5.253315 |          |            | 5.247434 |          |            |
| 29174,   | 1214932, | 2104.4261, | 29212,   | 1235152, | 2102.0729, | 29250,   | 1254760, | 2099.7197, |
| 5.259041 |          |            | 5.253160 |          |            | 5.247279 |          |            |
| 29175,   | 1215592, | 2104.3642, | 29213,   | 1235680, | 2102.0110, | 29251,   | 1255590, | 2099.6578, |
| 5.258886 |          |            | 5.253005 |          |            | 5.247124 |          |            |
| 29176,   | 1215346, | 2104.3023, | 29214,   | 1235770, | 2101.9491, | 29252,   | 1255604, | 2099.5958, |
| 5.258731 |          |            | 5.252850 |          |            | 5.246969 |          |            |
| 29177,   | 1214680, | 2104.2403, | 29215,   | 1235506, | 2101.8871, | 29253,   | 1255172, | 2099.5339, |
| 5.258576 |          |            | 5.252696 |          |            | 5.246815 |          |            |
| 29178,   | 1214962, | 2104.1784, | 29216,   | 1235570, | 2101.8252, | 29254,   | 1255378, | 2099.4720, |
| 5.258422 |          |            | 5.252541 |          |            | 5.246660 |          |            |
| 29179,   | 1216918, | 2104.1165, | 29217,   | 1236300, | 2101.7633, | 29255,   | 1256688, | 2099.4100, |
| 5.258267 |          |            | 5.252386 |          |            | 5.246505 |          |            |
| 29180,   | 1219658, | 2104.0546, | 29218,   | 1237186, | 2101.7013, | 29256,   | 1258334, | 2099.3481, |
| 5.258112 |          |            | 5.252231 |          |            | 5.246350 |          |            |
| 29181,   | 1221452, | 2103.9926, | 29219,   | 1237498, | 2101.6394, | 29257,   | 1259148, | 2099.2862, |
| 5.257957 |          |            | 5.252076 |          |            | 5.246196 |          |            |
| 29182,   | 1221472, | 2103.9307, | 29220,   | 1237250, | 2101.5775, | 29258,   | 1258850, | 2099.2243, |
| 5.257803 |          |            | 5.251922 |          |            | 5.246041 |          |            |
| 29183,   | 1220570, | 2103.8688, | 29221,   | 1237308, | 2101.5156, | 29259,   | 1258334, | 2099.1623, |
| 5.257648 |          |            | 5.251767 |          |            | 5.245886 |          |            |
| 29184,   | 1220268, | 2103.8069, | 29222,   | 1238372, | 2101.4536, | 29260,   | 1258590, | 2099.1004, |
| 5.257493 |          |            | 5.251612 |          |            | 5.245731 |          |            |
| 29185,   | 1221092, | 2103.7449, | 29223,   | 1240090, | 2101.3917, | 29261,   | 1259598, | 2099.0385, |
| 5.257338 |          |            | 5.251457 |          |            | 5.245577 |          |            |
| 29186,   | 1222174, | 2103.6830, | 29224,   | 1241402, | 2101.3298, | 29262,   | 1260492, | 2098.9766, |
| 5.257183 |          |            | 5.251303 |          |            | 5.245422 |          |            |
| 29187,   | 1222394, | 2103.6211, | 29225,   | 1241784, | 2101.2679, | 29263,   | 1260704, | 2098.9146, |
| 5.257029 |          |            | 5.251148 |          |            | 5.245267 |          |            |
| 29188,   | 1221752, | 2103.5592, | 29226,   | 1241864, | 2101.2059, | 29264,   | 1260688, | 2098.8527, |
| 5.256874 |          |            | 5.250993 |          |            | 5.245112 |          |            |
| 29189,   | 1221318, | 2103.4972, | 29227,   | 1242670, | 2101.1440, | 29265,   | 1261272, | 2098.7908, |
| 5.256719 |          |            | 5.250838 |          |            | 5.244958 |          |            |
| 29190,   | 1221918, | 2103.4353, | 29228,   | 1244314, | 2101.0821, | 29266,   | 1262514, | 2098.7289, |
| 5.256564 |          |            | 5.250684 |          |            | 5.244803 |          |            |
| 29191,   | 1223204, | 2103.3734, | 29229,   | 1245712, | 2101.0201, | 29267,   | 1263500, | 2098.6669, |
| 5.256410 |          |            | 5.250529 |          |            | 5.244648 |          |            |
| 29192,   | 1224100, | 2103.3114, | 29230,   | 1245824, | 2100.9582, | 29268,   | 1263414, | 2098.6050, |
| 5.256255 |          |            | 5.250374 |          |            | 5.244493 |          |            |

|          |          |            |          |          |            |          |          |            |
|----------|----------|------------|----------|----------|------------|----------|----------|------------|
| 29269,   | 1262586, | 2098.5431, | 29307,   | 1283466, | 2096.1898, | 29345,   | 1303624, | 2093.8366, |
| 5.244339 |          |            | 5.238458 |          |            | 5.232577 |          |            |
| 29270,   | 1262264, | 2098.4811, | 29308,   | 1282504, | 2096.1279, | 29346,   | 1303180, | 2093.7747, |
| 5.244184 |          |            | 5.238303 |          |            | 5.232422 |          |            |
| 29271,   | 1263286, | 2098.4192, | 29309,   | 1283402, | 2096.0660, | 29347,   | 1303856, | 2093.7128, |
| 5.244029 |          |            | 5.238148 |          |            | 5.232268 |          |            |
| 29272,   | 1265188, | 2098.3573, | 29310,   | 1285510, | 2096.0041, | 29348,   | 1305046, | 2093.6508, |
| 5.243874 |          |            | 5.237994 |          |            | 5.232113 |          |            |
| 29273,   | 1266852, | 2098.2954, | 29311,   | 1287092, | 2095.9421, | 29349,   | 1305580, | 2093.5889, |
| 5.243720 |          |            | 5.237839 |          |            | 5.231958 |          |            |
| 29274,   | 1267782, | 2098.2334, | 29312,   | 1287196, | 2095.8802, | 29350,   | 1305140, | 2093.5270, |
| 5.243565 |          |            | 5.237684 |          |            | 5.231803 |          |            |
| 29275,   | 1268562, | 2098.1715, | 29313,   | 1286490, | 2095.8183, | 29351,   | 1304598, | 2093.4651, |
| 5.243410 |          |            | 5.237529 |          |            | 5.231648 |          |            |
| 29276,   | 1269908, | 2098.1096, | 29314,   | 1286316, | 2095.7564, | 29352,   | 1304904, | 2093.4031, |
| 5.243255 |          |            | 5.237375 |          |            | 5.231494 |          |            |
| 29277,   | 1271580, | 2098.0477, | 29315,   | 1287106, | 2095.6944, | 29353,   | 1305956, | 2093.3412, |
| 5.243101 |          |            | 5.237220 |          |            | 5.231339 |          |            |
| 29278,   | 1272518, | 2097.9857, | 29316,   | 1288090, | 2095.6325, | 29354,   | 1306770, | 2093.2793, |
| 5.242946 |          |            | 5.237065 |          |            | 5.231184 |          |            |
| 29279,   | 1272152, | 2097.9238, | 29317,   | 1288450, | 2095.5706, | 29355,   | 1306828, | 2093.2174, |
| 5.242791 |          |            | 5.236910 |          |            | 5.231029 |          |            |
| 29280,   | 1271276, | 2097.8619, | 29318,   | 1288452, | 2095.5087, | 29356,   | 1306826, | 2093.1554, |
| 5.242636 |          |            | 5.236755 |          |            | 5.230875 |          |            |
| 29281,   | 1271292, | 2097.7999, | 29319,   | 1289114, | 2095.4467, | 29357,   | 1307910, | 2093.0935, |
| 5.242482 |          |            | 5.236601 |          |            | 5.230720 |          |            |
| 29282,   | 1272668, | 2097.7380, | 29320,   | 1290870, | 2095.3848, | 29358,   | 1310240, | 2093.0316, |
| 5.242327 |          |            | 5.236446 |          |            | 5.230565 |          |            |
| 29283,   | 1274320, | 2097.6761, | 29321,   | 1292878, | 2095.3229, | 29359,   | 1312632, | 2092.9696, |
| 5.242172 |          |            | 5.236291 |          |            | 5.230410 |          |            |
| 29284,   | 1274782, | 2097.6142, | 29322,   | 1293894, | 2095.2609, | 29360,   | 1313786, | 2092.9077, |
| 5.242017 |          |            | 5.236136 |          |            | 5.230256 |          |            |
| 29285,   | 1273816, | 2097.5522, | 29323,   | 1293666, | 2095.1990, | 29361,   | 1313694, | 2092.8458, |
| 5.241862 |          |            | 5.235982 |          |            | 5.230101 |          |            |
| 29286,   | 1272630, | 2097.4903, | 29324,   | 1293194, | 2095.1371, | 29362,   | 1313602, | 2092.7839, |
| 5.241708 |          |            | 5.235827 |          |            | 5.229946 |          |            |
| 29287,   | 1272548, | 2097.4284, | 29325,   | 1293524, | 2095.0752, | 29363,   | 1314522, | 2092.7219, |
| 5.241553 |          |            | 5.235672 |          |            | 5.229791 |          |            |
| 29288,   | 1273566, | 2097.3665, | 29326,   | 1294586, | 2095.0132, | 29364,   | 1316114, | 2092.6600, |
| 5.241398 |          |            | 5.235517 |          |            | 5.229637 |          |            |
| 29289,   | 1274574, | 2097.3045, | 29327,   | 1295406, | 2094.9513, | 29365,   | 1317168, | 2092.5981, |
| 5.241243 |          |            | 5.235363 |          |            | 5.229482 |          |            |
| 29290,   | 1274776, | 2097.2426, | 29328,   | 1295442, | 2094.8894, | 29366,   | 1317110, | 2092.5362, |
| 5.241089 |          |            | 5.235208 |          |            | 5.229327 |          |            |
| 29291,   | 1274642, | 2097.1807, | 29329,   | 1295322, | 2094.8275, | 29367,   | 1316704, | 2092.4742, |
| 5.240934 |          |            | 5.235053 |          |            | 5.229172 |          |            |
| 29292,   | 1275236, | 2097.1188, | 29330,   | 1296102, | 2094.7655, | 29368,   | 1317078, | 2092.4123, |
| 5.240779 |          |            | 5.234898 |          |            | 5.229018 |          |            |
| 29293,   | 1276726, | 2097.0568, | 29331,   | 1297860, | 2094.7036, | 29369,   | 1318312, | 2092.3504, |
| 5.240624 |          |            | 5.234744 |          |            | 5.228863 |          |            |
| 29294,   | 1278032, | 2096.9949, | 29332,   | 1299434, | 2094.6417, | 29370,   | 1319292, | 2092.2885, |
| 5.240470 |          |            | 5.234589 |          |            | 5.228708 |          |            |
| 29295,   | 1278046, | 2096.9330, | 29333,   | 1299660, | 2094.5797, | 29371,   | 1319052, | 2092.2265, |
| 5.240315 |          |            | 5.234434 |          |            | 5.228553 |          |            |
| 29296,   | 1276998, | 2096.8710, | 29334,   | 1298710, | 2094.5178, | 29372,   | 1317988, | 2092.1646, |
| 5.240160 |          |            | 5.234279 |          |            | 5.228399 |          |            |
| 29297,   | 1276348, | 2096.8091, | 29335,   | 1297946, | 2094.4559, | 29373,   | 1317496, | 2092.1027, |
| 5.240005 |          |            | 5.234125 |          |            | 5.228244 |          |            |
| 29298,   | 1277226, | 2096.7472, | 29336,   | 1298440, | 2094.3940, | 29374,   | 1318380, | 2092.0407, |
| 5.239851 |          |            | 5.233970 |          |            | 5.228089 |          |            |
| 29299,   | 1279214, | 2096.6853, | 29337,   | 1299852, | 2094.3320, | 29375,   | 1319928, | 2091.9788, |
| 5.239696 |          |            | 5.233815 |          |            | 5.227934 |          |            |
| 29300,   | 1280928, | 2096.6233, | 29338,   | 1300952, | 2094.2701, | 29376,   | 1320730, | 2091.9169, |
| 5.239541 |          |            | 5.233660 |          |            | 5.227780 |          |            |
| 29301,   | 1281614, | 2096.5614, | 29339,   | 1301124, | 2094.2082, | 29377,   | 1320296, | 2091.8550, |
| 5.239386 |          |            | 5.233506 |          |            | 5.227625 |          |            |
| 29302,   | 1281930, | 2096.4995, | 29340,   | 1301034, | 2094.1463, | 29378,   | 1319556, | 2091.7930, |
| 5.239232 |          |            | 5.233351 |          |            | 5.227470 |          |            |
| 29303,   | 1282940, | 2096.4376, | 29341,   | 1301720, | 2094.0843, | 29379,   | 1319730, | 2091.7311, |
| 5.239077 |          |            | 5.233196 |          |            | 5.227315 |          |            |
| 29304,   | 1284618, | 2096.3756, | 29342,   | 1303220, | 2094.0224, | 29380,   | 1320912, | 2091.6692, |
| 5.238922 |          |            | 5.233041 |          |            | 5.227161 |          |            |
| 29305,   | 1285690, | 2096.3137, | 29343,   | 1304450, | 2093.9605, | 29381,   | 1322096, | 2091.6073, |
| 5.238767 |          |            | 5.232887 |          |            | 5.227006 |          |            |
| 29306,   | 1285116, | 2096.2518, | 29344,   | 1304468, | 2093.8986, | 29382,   | 1322540, | 2091.5453, |
| 5.238613 |          |            | 5.232732 |          |            | 5.226851 |          |            |

|          |          |            |          |          |            |          |          |            |
|----------|----------|------------|----------|----------|------------|----------|----------|------------|
| 29383,   | 1322780, | 2091.4834, | 29421,   | 1345506, | 2089.1302, | 29459,   | 1367028, | 2086.7770, |
| 5.226696 |          |            | 5.220815 |          |            | 5.214935 |          |            |
| 29384,   | 1323998, | 2091.4215, | 29422,   | 1345440, | 2089.0683, | 29460,   | 1366950, | 2086.7150, |
| 5.226541 |          |            | 5.220661 |          |            | 5.214780 |          |            |
| 29385,   | 1326502, | 2091.3596, | 29423,   | 1346320, | 2089.0063, | 29461,   | 1367760, | 2086.6531, |
| 5.226387 |          |            | 5.220506 |          |            | 5.214625 |          |            |
| 29386,   | 1329166, | 2091.2976, | 29424,   | 1347428, | 2088.9444, | 29462,   | 1368650, | 2086.5912, |
| 5.226232 |          |            | 5.220351 |          |            | 5.214470 |          |            |
| 29387,   | 1330540, | 2091.2357, | 29425,   | 1347828, | 2088.8825, | 29463,   | 1368668, | 2086.5293, |
| 5.226077 |          |            | 5.220196 |          |            | 5.214316 |          |            |
| 29388,   | 1330402, | 2091.1738, | 29426,   | 1347586, | 2088.8205, | 29464,   | 1368042, | 2086.4673, |
| 5.225922 |          |            | 5.220042 |          |            | 5.214161 |          |            |
| 29389,   | 1329900, | 2091.1118, | 29427,   | 1347660, | 2088.7586, | 29465,   | 1368002, | 2086.4054, |
| 5.225768 |          |            | 5.219887 |          |            | 5.214006 |          |            |
| 29390,   | 1330124, | 2091.0499, | 29428,   | 1348644, | 2088.6967, | 29466,   | 1369318, | 2086.3435, |
| 5.225613 |          |            | 5.219732 |          |            | 5.213851 |          |            |
| 29391,   | 1330844, | 2090.9880, | 29429,   | 1349910, | 2088.6348, | 29467,   | 1371348, | 2086.2815, |
| 5.225458 |          |            | 5.219577 |          |            | 5.213697 |          |            |
| 29392,   | 1330874, | 2090.9261, | 29430,   | 1350308, | 2088.5728, | 29468,   | 1372736, | 2086.2196, |
| 5.225303 |          |            | 5.219423 |          |            | 5.213542 |          |            |
| 29393,   | 1329638, | 2090.8641, | 29431,   | 1349594, | 2088.5109, | 29469,   | 1372996, | 2086.1577, |
| 5.225149 |          |            | 5.219268 |          |            | 5.213387 |          |            |
| 29394,   | 1328070, | 2090.8022, | 29432,   | 1348862, | 2088.4490, | 29470,   | 1373072, | 2086.0958, |
| 5.224994 |          |            | 5.219113 |          |            | 5.213232 |          |            |
| 29395,   | 1327704, | 2090.7403, | 29433,   | 1349388, | 2088.3871, | 29471,   | 1374156, | 2086.0338, |
| 5.224839 |          |            | 5.218958 |          |            | 5.213078 |          |            |
| 29396,   | 1329018, | 2090.6784, | 29434,   | 1351144, | 2088.3251, | 29472,   | 1376212, | 2085.9719, |
| 5.224684 |          |            | 5.218804 |          |            | 5.212923 |          |            |
| 29397,   | 1330916, | 2090.6164, | 29435,   | 1352876, | 2088.2632, | 29473,   | 1377894, | 2085.9100, |
| 5.224530 |          |            | 5.218649 |          |            | 5.212768 |          |            |
| 29398,   | 1331970, | 2090.5545, | 29436,   | 1353522, | 2088.2013, | 29474,   | 1378056, | 2085.8481, |
| 5.224375 |          |            | 5.218494 |          |            | 5.212613 |          |            |
| 29399,   | 1331938, | 2090.4926, | 29437,   | 1353470, | 2088.1394, | 29475,   | 1377030, | 2085.7861, |
| 5.224220 |          |            | 5.218339 |          |            | 5.212459 |          |            |
| 29400,   | 1331826, | 2090.4306, | 29438,   | 1354026, | 2088.0774, | 29476,   | 1376276, | 2085.7242, |
| 5.224065 |          |            | 5.218185 |          |            | 5.212304 |          |            |
| 29401,   | 1332550, | 2090.3687, | 29439,   | 1355800, | 2088.0155, | 29477,   | 1376758, | 2085.6623, |
| 5.223911 |          |            | 5.218030 |          |            | 5.212149 |          |            |
| 29402,   | 1333852, | 2090.3068, | 29440,   | 1357870, | 2087.9536, | 29478,   | 1377988, | 2085.6003, |
| 5.223756 |          |            | 5.217875 |          |            | 5.211994 |          |            |
| 29403,   | 1334704, | 2090.2449, | 29441,   | 1358790, | 2087.8916, | 29479,   | 1378776, | 2085.5384, |
| 5.223601 |          |            | 5.217720 |          |            | 5.211839 |          |            |
| 29404,   | 1334710, | 2090.1829, | 29442,   | 1358244, | 2087.8297, | 29480,   | 1378680, | 2085.4765, |
| 5.223446 |          |            | 5.217566 |          |            | 5.211685 |          |            |
| 29405,   | 1334666, | 2090.1210, | 29443,   | 1357378, | 2087.7678, | 29481,   | 1378444, | 2085.4146, |
| 5.223292 |          |            | 5.217411 |          |            | 5.211530 |          |            |
| 29406,   | 1335624, | 2090.0591, | 29444,   | 1357450, | 2087.7059, | 29482,   | 1378974, | 2085.3526, |
| 5.223137 |          |            | 5.217256 |          |            | 5.211375 |          |            |
| 29407,   | 1337564, | 2089.9972, | 29445,   | 1358398, | 2087.6439, | 29483,   | 1380200, | 2085.2907, |
| 5.222982 |          |            | 5.217101 |          |            | 5.211220 |          |            |
| 29408,   | 1339360, | 2089.9352, | 29446,   | 1359018, | 2087.5820, | 29484,   | 1381224, | 2085.2288, |
| 5.222827 |          |            | 5.216946 |          |            | 5.211066 |          |            |
| 29409,   | 1340058, | 2089.8733, | 29447,   | 1358564, | 2087.5201, | 29485,   | 1381510, | 2085.1669, |
| 5.222673 |          |            | 5.216792 |          |            | 5.210911 |          |            |
| 29410,   | 1339978, | 2089.8114, | 29448,   | 1357784, | 2087.4582, | 29486,   | 1381600, | 2085.1049, |
| 5.222518 |          |            | 5.216637 |          |            | 5.210756 |          |            |
| 29411,   | 1340262, | 2089.7495, | 29449,   | 1358136, | 2087.3962, | 29487,   | 1382420, | 2085.0430, |
| 5.222363 |          |            | 5.216482 |          |            | 5.210601 |          |            |
| 29412,   | 1341462, | 2089.6875, | 29450,   | 1360050, | 2087.3343, | 29488,   | 1384022, | 2084.9811, |
| 5.222208 |          |            | 5.216327 |          |            | 5.210447 |          |            |
| 29413,   | 1342838, | 2089.6256, | 29451,   | 1362332, | 2087.2724, | 29489,   | 1385428, | 2084.9192, |
| 5.222054 |          |            | 5.216173 |          |            | 5.210292 |          |            |
| 29414,   | 1343264, | 2089.5637, | 29452,   | 1363428, | 2087.2104, | 29490,   | 1385774, | 2084.8572, |
| 5.221899 |          |            | 5.216018 |          |            | 5.210137 |          |            |
| 29415,   | 1342642, | 2089.5017, | 29453,   | 1363142, | 2087.1485, | 29491,   | 1385426, | 2084.7953, |
| 5.221744 |          |            | 5.215863 |          |            | 5.209982 |          |            |
| 29416,   | 1342122, | 2089.4398, | 29454,   | 1362798, | 2087.0866, | 29492,   | 1385622, | 2084.7334, |
| 5.221589 |          |            | 5.215708 |          |            | 5.209828 |          |            |
| 29417,   | 1342806, | 2089.3779, | 29455,   | 1363702, | 2087.0247, | 29493,   | 1387032, | 2084.6714, |
| 5.221434 |          |            | 5.215554 |          |            | 5.209673 |          |            |
| 29418,   | 1344476, | 2089.3160, | 29456,   | 1365654, | 2086.9627, | 29494,   | 1388918, | 2084.6095, |
| 5.221280 |          |            | 5.215399 |          |            | 5.209518 |          |            |
| 29419,   | 1345856, | 2089.2540, | 29457,   | 1367258, | 2086.9008, | 29495,   | 1389978, | 2084.5476, |
| 5.221125 |          |            | 5.215244 |          |            | 5.209363 |          |            |
| 29420,   | 1346042, | 2089.1921, | 29458,   | 1367544, | 2086.8389, | 29496,   | 1389914, | 2084.4857, |
| 5.220970 |          |            | 5.215089 |          |            | 5.209209 |          |            |

|          |          |            |          |          |            |          |          |            |
|----------|----------|------------|----------|----------|------------|----------|----------|------------|
| 29497,   | 1389800, | 2084.4237, | 29535,   | 1412738, | 2082.0705, | 29573,   | 1433640, | 2079.7173, |
| 5.209054 |          |            | 5.203173 |          |            | 5.197292 |          |            |
| 29498,   | 1390796, | 2084.3618, | 29536,   | 1413298, | 2082.0086, | 29574,   | 1434446, | 2079.6554, |
| 5.208899 |          |            | 5.203018 |          |            | 5.197138 |          |            |
| 29499,   | 1392684, | 2084.2999, | 29537,   | 1414696, | 2081.9467, | 29575,   | 1436312, | 2079.5934, |
| 5.208744 |          |            | 5.202864 |          |            | 5.196983 |          |            |
| 29500,   | 1394016, | 2084.2380, | 29538,   | 1415890, | 2081.8847, | 29576,   | 1438068, | 2079.5315, |
| 5.208590 |          |            | 5.202709 |          |            | 5.196828 |          |            |
| 29501,   | 1393764, | 2084.1760, | 29539,   | 1416012, | 2081.8228, | 29577,   | 1438756, | 2079.4696, |
| 5.208435 |          |            | 5.202554 |          |            | 5.196673 |          |            |
| 29502,   | 1392570, | 2084.1141, | 29540,   | 1415528, | 2081.7609, | 29578,   | 1438650, | 2079.4077, |
| 5.208280 |          |            | 5.202399 |          |            | 5.196518 |          |            |
| 29503,   | 1392088, | 2084.0522, | 29541,   | 1415742, | 2081.6990, | 29579,   | 1438794, | 2079.3457, |
| 5.208125 |          |            | 5.202245 |          |            | 5.196364 |          |            |
| 29504,   | 1393168, | 2083.9902, | 29542,   | 1417262, | 2081.6370, | 29580,   | 1439648, | 2079.2838, |
| 5.207971 |          |            | 5.202090 |          |            | 5.196209 |          |            |
| 29505,   | 1394970, | 2083.9283, | 29543,   | 1419250, | 2081.5751, | 29581,   | 1440558, | 2079.2219, |
| 5.207816 |          |            | 5.201935 |          |            | 5.196054 |          |            |
| 29506,   | 1396016, | 2083.8664, | 29544,   | 1420394, | 2081.5132, | 29582,   | 1440674, | 2079.1599, |
| 5.207661 |          |            | 5.201780 |          |            | 5.195899 |          |            |
| 29507,   | 1395946, | 2083.8045, | 29545,   | 1420408, | 2081.4512, | 29583,   | 1440150, | 2079.0980, |
| 5.207506 |          |            | 5.201625 |          |            | 5.195745 |          |            |
| 29508,   | 1395826, | 2083.7425, | 29546,   | 1420284, | 2081.3893, | 29584,   | 1440102, | 2079.0361, |
| 5.207352 |          |            | 5.201471 |          |            | 5.195590 |          |            |
| 29509,   | 1396760, | 2083.6806, | 29547,   | 1421008, | 2081.3274, | 29585,   | 1441296, | 2078.9742, |
| 5.207197 |          |            | 5.201316 |          |            | 5.195435 |          |            |
| 29510,   | 1398438, | 2083.6187, | 29548,   | 1422310, | 2081.2655, | 29586,   | 1443190, | 2078.9122, |
| 5.207042 |          |            | 5.201161 |          |            | 5.195280 |          |            |
| 29511,   | 1399460, | 2083.5568, | 29549,   | 1423000, | 2081.2035, | 29587,   | 1444450, | 2078.8503, |
| 5.206887 |          |            | 5.201006 |          |            | 5.195126 |          |            |
| 29512,   | 1399062, | 2083.4948, | 29550,   | 1422502, | 2081.1416, | 29588,   | 1444486, | 2078.7884, |
| 5.206732 |          |            | 5.200852 |          |            | 5.194971 |          |            |
| 29513,   | 1398152, | 2083.4329, | 29551,   | 1421686, | 2081.0797, | 29589,   | 1444074, | 2078.7265, |
| 5.206578 |          |            | 5.200697 |          |            | 5.194816 |          |            |
| 29514,   | 1398390, | 2083.3710, | 29552,   | 1421940, | 2081.0178, | 29590,   | 1444436, | 2078.6645, |
| 5.206423 |          |            | 5.200542 |          |            | 5.194661 |          |            |
| 29515,   | 1400284, | 2083.3091, | 29553,   | 1423528, | 2080.9558, | 29591,   | 1445804, | 2078.6026, |
| 5.206268 |          |            | 5.200387 |          |            | 5.194507 |          |            |
| 29516,   | 1402570, | 2083.2471, | 29554,   | 1425206, | 2080.8939, | 29592,   | 1447250, | 2078.5407, |
| 5.206113 |          |            | 5.200233 |          |            | 5.194352 |          |            |
| 29517,   | 1403622, | 2083.1852, | 29555,   | 1425606, | 2080.8320, | 29593,   | 1447914, | 2078.4788, |
| 5.205959 |          |            | 5.200078 |          |            | 5.194197 |          |            |
| 29518,   | 1403238, | 2083.1233, | 29556,   | 1424834, | 2080.7700, | 29594,   | 1448134, | 2078.4168, |
| 5.205804 |          |            | 5.199923 |          |            | 5.194042 |          |            |
| 29519,   | 1402846, | 2083.0613, | 29557,   | 1424348, | 2080.7081, | 29595,   | 1449052, | 2078.3549, |
| 5.205649 |          |            | 5.199768 |          |            | 5.193888 |          |            |
| 29520,   | 1403780, | 2082.9994, | 29558,   | 1425298, | 2080.6462, | 29596,   | 1451148, | 2078.2930, |
| 5.205494 |          |            | 5.199614 |          |            | 5.193733 |          |            |
| 29521,   | 1405762, | 2082.9375, | 29559,   | 1427192, | 2080.5843, | 29597,   | 1453508, | 2078.2310, |
| 5.205340 |          |            | 5.199459 |          |            | 5.193578 |          |            |
| 29522,   | 1407254, | 2082.8756, | 29560,   | 1428470, | 2080.5223, | 29598,   | 1454762, | 2078.1691, |
| 5.205185 |          |            | 5.199304 |          |            | 5.193423 |          |            |
| 29523,   | 1407266, | 2082.8136, | 29561,   | 1428278, | 2080.4604, | 29599,   | 1454656, | 2078.1072, |
| 5.205030 |          |            | 5.199149 |          |            | 5.193269 |          |            |
| 29524,   | 1406460, | 2082.7517, | 29562,   | 1427410, | 2080.3985, | 29600,   | 1454360, | 2078.0453, |
| 5.204875 |          |            | 5.198995 |          |            | 5.193114 |          |            |
| 29525,   | 1406294, | 2082.6898, | 29563,   | 1427348, | 2080.3366, | 29601,   | 1455126, | 2077.9833, |
| 5.204721 |          |            | 5.198840 |          |            | 5.192959 |          |            |
| 29526,   | 1407302, | 2082.6279, | 29564,   | 1428580, | 2080.2746, | 29602,   | 1456832, | 2077.9214, |
| 5.204566 |          |            | 5.198685 |          |            | 5.192804 |          |            |
| 29527,   | 1408528, | 2082.5659, | 29565,   | 1430146, | 2080.2127, | 29603,   | 1458140, | 2077.8595, |
| 5.204411 |          |            | 5.198530 |          |            | 5.192650 |          |            |
| 29528,   | 1408798, | 2082.5040, | 29566,   | 1430890, | 2080.1508, | 29604,   | 1458082, | 2077.7976, |
| 5.204256 |          |            | 5.198376 |          |            | 5.192495 |          |            |
| 29529,   | 1408194, | 2082.4421, | 29567,   | 1430800, | 2080.0889, | 29605,   | 1457214, | 2077.7356, |
| 5.204102 |          |            | 5.198221 |          |            | 5.192340 |          |            |
| 29530,   | 1407996, | 2082.3801, | 29568,   | 1430926, | 2080.0269, | 29606,   | 1456972, | 2077.6737, |
| 5.203947 |          |            | 5.198066 |          |            | 5.192185 |          |            |
| 29531,   | 1409160, | 2082.3182, | 29569,   | 1431992, | 2079.9650, | 29607,   | 1458010, | 2077.6118, |
| 5.203792 |          |            | 5.197911 |          |            | 5.192031 |          |            |
| 29532,   | 1411168, | 2082.2563, | 29570,   | 1433456, | 2079.9031, | 29608,   | 1459478, | 2077.5499, |
| 5.203637 |          |            | 5.197757 |          |            | 5.191876 |          |            |
| 29533,   | 1412636, | 2082.1944, | 29571,   | 1434200, | 2079.8411, | 29609,   | 1460078, | 2077.4879, |
| 5.203483 |          |            | 5.197602 |          |            | 5.191721 |          |            |
| 29534,   | 1412904, | 2082.1324, | 29572,   | 1433934, | 2079.7792, | 29610,   | 1459640, | 2077.4260, |
| 5.203328 |          |            | 5.197447 |          |            | 5.191566 |          |            |

|          |          |            |          |          |            |          |          |            |
|----------|----------|------------|----------|----------|------------|----------|----------|------------|
| 29611,   | 1459318, | 2077.3641, | 29649,   | 1482132, | 2075.0108, | 29687,   | 1511880, | 2072.6576, |
| 5.191411 |          |            | 5.185531 |          |            | 5.179650 |          |            |
| 29612,   | 1460210, | 2077.3021, | 29650,   | 1483752, | 2074.9489, | 29688,   | 1513214, | 2072.5957, |
| 5.191257 |          |            | 5.185376 |          |            | 5.179495 |          |            |
| 29613,   | 1462074, | 2077.2402, | 29651,   | 1486382, | 2074.8870, | 29689,   | 1515152, | 2072.5338, |
| 5.191102 |          |            | 5.185221 |          |            | 5.179340 |          |            |
| 29614,   | 1463628, | 2077.1783, | 29652,   | 1488702, | 2074.8251, | 29690,   | 1516236, | 2072.4718, |
| 5.190947 |          |            | 5.185066 |          |            | 5.179186 |          |            |
| 29615,   | 1464100, | 2077.1164, | 29653,   | 1490076, | 2074.7631, | 29691,   | 1515934, | 2072.4099, |
| 5.190792 |          |            | 5.184912 |          |            | 5.179031 |          |            |
| 29616,   | 1464142, | 2077.0544, | 29654,   | 1491200, | 2074.7012, | 29692,   | 1515278, | 2072.3480, |
| 5.190638 |          |            | 5.184757 |          |            | 5.178876 |          |            |
| 29617,   | 1464978, | 2076.9925, | 29655,   | 1493036, | 2074.6393, | 29693,   | 1515670, | 2072.2861, |
| 5.190483 |          |            | 5.184602 |          |            | 5.178721 |          |            |
| 29618,   | 1466904, | 2076.9306, | 29656,   | 1495396, | 2074.5774, | 29694,   | 1517358, | 2072.2241, |
| 5.190328 |          |            | 5.184447 |          |            | 5.178567 |          |            |
| 29619,   | 1468874, | 2076.8687, | 29657,   | 1496974, | 2074.5154, | 29695,   | 1519252, | 2072.1622, |
| 5.190173 |          |            | 5.184293 |          |            | 5.178412 |          |            |
| 29620,   | 1469700, | 2076.8067, | 29658,   | 1496854, | 2074.4535, | 29696,   | 1520266, | 2072.1003, |
| 5.190019 |          |            | 5.184138 |          |            | 5.178257 |          |            |
| 29621,   | 1469448, | 2076.7448, | 29659,   | 1495720, | 2074.3916, | 29697,   | 1520522, | 2072.0384, |
| 5.189864 |          |            | 5.183983 |          |            | 5.178102 |          |            |
| 29622,   | 1469288, | 2076.6829, | 29660,   | 1495286, | 2074.3297, | 29698,   | 1520964, | 2071.9764, |
| 5.189709 |          |            | 5.183828 |          |            | 5.177948 |          |            |
| 29623,   | 1470084, | 2076.6209, | 29661,   | 1496496, | 2074.2677, | 29699,   | 1522060, | 2071.9145, |
| 5.189554 |          |            | 5.183674 |          |            | 5.177793 |          |            |
| 29624,   | 1471332, | 2076.5590, | 29662,   | 1498544, | 2074.2058, | 29700,   | 1523126, | 2071.8526, |
| 5.189400 |          |            | 5.183519 |          |            | 5.177638 |          |            |
| 29625,   | 1471820, | 2076.4971, | 29663,   | 1499828, | 2074.1439, | 29701,   | 1523246, | 2071.7906, |
| 5.189245 |          |            | 5.183364 |          |            | 5.177483 |          |            |
| 29626,   | 1471130, | 2076.4352, | 29664,   | 1499728, | 2074.0819, | 29702,   | 1522522, | 2071.7287, |
| 5.189090 |          |            | 5.183209 |          |            | 5.177329 |          |            |
| 29627,   | 1470208, | 2076.3732, | 29665,   | 1499172, | 2074.0200, | 29703,   | 1522126, | 2071.6668, |
| 5.188935 |          |            | 5.183055 |          |            | 5.177174 |          |            |
| 29628,   | 1470342, | 2076.3113, | 29666,   | 1499412, | 2073.9581, | 29704,   | 1522984, | 2071.6049, |
| 5.188781 |          |            | 5.182900 |          |            | 5.177019 |          |            |
| 29629,   | 1471680, | 2076.2494, | 29667,   | 1500548, | 2073.8962, | 29705,   | 1524686, | 2071.5429, |
| 5.188626 |          |            | 5.182745 |          |            | 5.176864 |          |            |
| 29630,   | 1473160, | 2076.1875, | 29668,   | 1501522, | 2073.8342, | 29706,   | 1525968, | 2071.4810, |
| 5.188471 |          |            | 5.182590 |          |            | 5.176710 |          |            |
| 29631,   | 1473812, | 2076.1255, | 29669,   | 1501522, | 2073.7723, | 29707,   | 1526228, | 2071.4191, |
| 5.188316 |          |            | 5.182436 |          |            | 5.176555 |          |            |
| 29632,   | 1473890, | 2076.0636, | 29670,   | 1501028, | 2073.7104, | 29708,   | 1526202, | 2071.3572, |
| 5.188162 |          |            | 5.182281 |          |            | 5.176400 |          |            |
| 29633,   | 1474476, | 2076.0017, | 29671,   | 1501220, | 2073.6485, | 29709,   | 1527038, | 2071.2952, |
| 5.188007 |          |            | 5.182126 |          |            | 5.176245 |          |            |
| 29634,   | 1476042, | 2075.9398, | 29672,   | 1502528, | 2073.5865, | 29710,   | 1528818, | 2071.2333, |
| 5.187852 |          |            | 5.181971 |          |            | 5.176090 |          |            |
| 29635,   | 1477784, | 2075.8778, | 29673,   | 1504060, | 2073.5246, | 29711,   | 1530358, | 2071.1714, |
| 5.187697 |          |            | 5.181817 |          |            | 5.175936 |          |            |
| 29636,   | 1478514, | 2075.8159, | 29674,   | 1504686, | 2073.4627, | 29712,   | 1530600, | 2071.1095, |
| 5.187543 |          |            | 5.181662 |          |            | 5.175781 |          |            |
| 29637,   | 1478078, | 2075.7540, | 29675,   | 1504410, | 2073.4007, | 29713,   | 1529900, | 2071.0475, |
| 5.187388 |          |            | 5.181507 |          |            | 5.175626 |          |            |
| 29638,   | 1477530, | 2075.6920, | 29676,   | 1504384, | 2073.3388, | 29714,   | 1529690, | 2070.9856, |
| 5.187233 |          |            | 5.181352 |          |            | 5.175471 |          |            |
| 29639,   | 1477882, | 2075.6301, | 29677,   | 1505508, | 2073.2769, | 29715,   | 1530832, | 2070.9237, |
| 5.187078 |          |            | 5.181197 |          |            | 5.175317 |          |            |
| 29640,   | 1478910, | 2075.5682, | 29678,   | 1507294, | 2073.2150, | 29716,   | 1532642, | 2070.8617, |
| 5.186924 |          |            | 5.181043 |          |            | 5.175162 |          |            |
| 29641,   | 1479490, | 2075.5063, | 29679,   | 1508422, | 2073.1530, | 29717,   | 1533734, | 2070.7998, |
| 5.186769 |          |            | 5.180888 |          |            | 5.175007 |          |            |
| 29642,   | 1479052, | 2075.4443, | 29680,   | 1508320, | 2073.0911, | 29718,   | 1533706, | 2070.7379, |
| 5.186614 |          |            | 5.180733 |          |            | 5.174852 |          |            |
| 29643,   | 1478356, | 2075.3824, | 29681,   | 1507878, | 2073.0292, | 29719,   | 1533614, | 2070.6760, |
| 5.186459 |          |            | 5.180578 |          |            | 5.174698 |          |            |
| 29644,   | 1478650, | 2075.3205, | 29682,   | 1508412, | 2072.9673, | 29720,   | 1534682, | 2070.6140, |
| 5.186304 |          |            | 5.180424 |          |            | 5.174543 |          |            |
| 29645,   | 1480162, | 2075.2586, | 29683,   | 1510114, | 2072.9053, | 29721,   | 1536752, | 2070.5521, |
| 5.186150 |          |            | 5.180269 |          |            | 5.174388 |          |            |
| 29646,   | 1481778, | 2075.1966, | 29684,   | 1511782, | 2072.8434, | 29722,   | 1538400, | 2070.4902, |
| 5.185995 |          |            | 5.180114 |          |            | 5.174233 |          |            |
| 29647,   | 1482328, | 2075.1347, | 29685,   | 1512278, | 2072.7815, | 29723,   | 1538564, | 2070.4283, |
| 5.185840 |          |            | 5.179959 |          |            | 5.174079 |          |            |
| 29648,   | 1481990, | 2075.0728, | 29686,   | 1511852, | 2072.7196, | 29724,   | 1537850, | 2070.3663, |
| 5.185685 |          |            | 5.179805 |          |            | 5.173924 |          |            |



|          |          |            |          |          |            |          |          |            |
|----------|----------|------------|----------|----------|------------|----------|----------|------------|
| 29725,   | 1537890, | 2070.3044, | 29763,   | 1562922, | 2067.9512, | 29801,   | 1595426, | 2065.5980, |
| 5.173769 |          |            | 5.167888 |          |            | 5.162008 |          |            |
| 29726,   | 1539536, | 2070.2425, | 29764,   | 1564836, | 2067.8893, | 29802,   | 1597070, | 2065.5360, |
| 5.173614 |          |            | 5.167734 |          |            | 5.161853 |          |            |
| 29727,   | 1541944, | 2070.1805, | 29765,   | 1566902, | 2067.8273, | 29803,   | 1598874, | 2065.4741, |
| 5.173460 |          |            | 5.167579 |          |            | 5.161698 |          |            |
| 29728,   | 1543632, | 2070.1186, | 29766,   | 1567904, | 2067.7654, | 29804,   | 1599618, | 2065.4122, |
| 5.173305 |          |            | 5.167424 |          |            | 5.161543 |          |            |
| 29729,   | 1544222, | 2070.0567, | 29767,   | 1567774, | 2067.7035, | 29805,   | 1599448, | 2065.3502, |
| 5.173150 |          |            | 5.167269 |          |            | 5.161388 |          |            |
| 29730,   | 1544782, | 2069.9948, | 29768,   | 1567696, | 2067.6415, | 29806,   | 1599676, | 2065.2883, |
| 5.172995 |          |            | 5.167115 |          |            | 5.161234 |          |            |
| 29731,   | 1546386, | 2069.9328, | 29769,   | 1568698, | 2067.5796, | 29807,   | 1601146, | 2065.2264, |
| 5.172841 |          |            | 5.166960 |          |            | 5.161079 |          |            |
| 29732,   | 1548670, | 2069.8709, | 29770,   | 1570460, | 2067.5177, | 29808,   | 1603112, | 2065.1645, |
| 5.172686 |          |            | 5.166805 |          |            | 5.160924 |          |            |
| 29733,   | 1550150, | 2069.8090, | 29771,   | 1571752, | 2067.4558, | 29809,   | 1604046, | 2065.1025, |
| 5.172531 |          |            | 5.166650 |          |            | 5.160769 |          |            |
| 29734,   | 1549982, | 2069.7471, | 29772,   | 1571938, | 2067.3938, | 29810,   | 1603426, | 2065.0406, |
| 5.172376 |          |            | 5.166495 |          |            | 5.160615 |          |            |
| 29735,   | 1549044, | 2069.6851, | 29773,   | 1571756, | 2067.3319, | 29811,   | 1602490, | 2064.9787, |
| 5.172222 |          |            | 5.166341 |          |            | 5.160460 |          |            |
| 29736,   | 1549056, | 2069.6232, | 29774,   | 1572408, | 2067.2700, | 29812,   | 1602926, | 2064.9168, |
| 5.172067 |          |            | 5.166186 |          |            | 5.160305 |          |            |
| 29737,   | 1550700, | 2069.5613, | 29775,   | 1574072, | 2067.2081, | 29813,   | 1605080, | 2064.8548, |
| 5.171912 |          |            | 5.166031 |          |            | 5.160150 |          |            |
| 29738,   | 1552906, | 2069.4994, | 29776,   | 1575650, | 2067.1461, | 29814,   | 1607630, | 2064.7929, |
| 5.171757 |          |            | 5.165876 |          |            | 5.159996 |          |            |
| 29739,   | 1554134, | 2069.4374, | 29777,   | 1576100, | 2067.0842, | 29815,   | 1609098, | 2064.7310, |
| 5.171602 |          |            | 5.165722 |          |            | 5.159841 |          |            |
| 29740,   | 1554108, | 2069.3755, | 29778,   | 1575722, | 2067.0223, | 29816,   | 1609414, | 2064.6691, |
| 5.171448 |          |            | 5.165567 |          |            | 5.159686 |          |            |
| 29741,   | 1554014, | 2069.3136, | 29779,   | 1575880, | 2066.9603, | 29817,   | 1609754, | 2064.6071, |
| 5.171293 |          |            | 5.165412 |          |            | 5.159531 |          |            |
| 29742,   | 1554996, | 2069.2516, | 29780,   | 1577424, | 2066.8984, | 29818,   | 1610980, | 2064.5452, |
| 5.171138 |          |            | 5.165257 |          |            | 5.159377 |          |            |
| 29743,   | 1556760, | 2069.1897, | 29781,   | 1579688, | 2066.8365, | 29819,   | 1612590, | 2064.4833, |
| 5.170983 |          |            | 5.165103 |          |            | 5.159222 |          |            |
| 29744,   | 1557950, | 2069.1278, | 29782,   | 1581256, | 2066.7746, | 29820,   | 1613446, | 2064.4213, |
| 5.170829 |          |            | 5.164948 |          |            | 5.159067 |          |            |
| 29745,   | 1557808, | 2069.0659, | 29783,   | 1581640, | 2066.7126, | 29821,   | 1613266, | 2064.3594, |
| 5.170674 |          |            | 5.164793 |          |            | 5.158912 |          |            |
| 29746,   | 1557050, | 2069.0039, | 29784,   | 1581774, | 2066.6507, | 29822,   | 1613046, | 2064.2975, |
| 5.170519 |          |            | 5.164638 |          |            | 5.158758 |          |            |
| 29747,   | 1556968, | 2068.9420, | 29785,   | 1582886, | 2066.5888, | 29823,   | 1613856, | 2064.2356, |
| 5.170364 |          |            | 5.164484 |          |            | 5.158603 |          |            |
| 29748,   | 1557832, | 2068.8801, | 29786,   | 1585014, | 2066.5269, | 29824,   | 1615462, | 2064.1736, |
| 5.170210 |          |            | 5.164329 |          |            | 5.158448 |          |            |
| 29749,   | 1558552, | 2068.8182, | 29787,   | 1586992, | 2066.4649, | 29825,   | 1616500, | 2064.1117, |
| 5.170055 |          |            | 5.164174 |          |            | 5.158293 |          |            |
| 29750,   | 1558022, | 2068.7562, | 29788,   | 1587888, | 2066.4030, | 29826,   | 1616078, | 2064.0498, |
| 5.169900 |          |            | 5.164019 |          |            | 5.158139 |          |            |
| 29751,   | 1556524, | 2068.6943, | 29789,   | 1588138, | 2066.3411, | 29827,   | 1614898, | 2063.9879, |
| 5.169745 |          |            | 5.163865 |          |            | 5.157984 |          |            |
| 29752,   | 1555520, | 2068.6324, | 29790,   | 1588998, | 2066.2792, | 29828,   | 1614552, | 2063.9259, |
| 5.169591 |          |            | 5.163710 |          |            | 5.157829 |          |            |
| 29753,   | 1556046, | 2068.5704, | 29791,   | 1590952, | 2066.2172, | 29829,   | 1615804, | 2063.8640, |
| 5.169436 |          |            | 5.163555 |          |            | 5.157674 |          |            |
| 29754,   | 1557592, | 2068.5085, | 29792,   | 1593066, | 2066.1553, | 29830,   | 1617776, | 2063.8021, |
| 5.169281 |          |            | 5.163400 |          |            | 5.157520 |          |            |
| 29755,   | 1558762, | 2068.4466, | 29793,   | 1594016, | 2066.0934, | 29831,   | 1618968, | 2063.7402, |
| 5.169126 |          |            | 5.163246 |          |            | 5.157365 |          |            |
| 29756,   | 1558890, | 2068.3847, | 29794,   | 1593656, | 2066.0314, | 29832,   | 1618914, | 2063.6782, |
| 5.168972 |          |            | 5.163091 |          |            | 5.157210 |          |            |
| 29757,   | 1558668, | 2068.3227, | 29795,   | 1593180, | 2065.9695, | 29833,   | 1618578, | 2063.6163, |
| 5.168817 |          |            | 5.162936 |          |            | 5.157055 |          |            |
| 29758,   | 1559182, | 2068.2608, | 29796,   | 1593728, | 2065.9076, | 29834,   | 1619146, | 2063.5544, |
| 5.168662 |          |            | 5.162781 |          |            | 5.156901 |          |            |
| 29759,   | 1560526, | 2068.1989, | 29797,   | 1595064, | 2065.8457, | 29835,   | 1620710, | 2063.4924, |
| 5.168507 |          |            | 5.162627 |          |            | 5.156746 |          |            |
| 29760,   | 1561746, | 2068.1370, | 29798,   | 1595942, | 2065.7837, | 29836,   | 1622356, | 2063.4305, |
| 5.168353 |          |            | 5.162472 |          |            | 5.156591 |          |            |
| 29761,   | 1562122, | 2068.0750, | 29799,   | 1595684, | 2065.7218, | 29837,   | 1623396, | 2063.3686, |
| 5.168198 |          |            | 5.162317 |          |            | 5.156436 |          |            |
| 29762,   | 1562138, | 2068.0131, | 29800,   | 1595064, | 2065.6599, | 29838,   | 1624122, | 2063.3067, |
| 5.168043 |          |            | 5.162162 |          |            | 5.156281 |          |            |

|          |          |            |          |          |            |          |          |            |
|----------|----------|------------|----------|----------|------------|----------|----------|------------|
| 29839,   | 1625244, | 2063.2447, | 29877,   | 1657514, | 2060.8915, | 29915,   | 1689000, | 2058.5383, |
| 5.156127 |          |            | 5.150246 |          |            | 5.144365 |          |            |
| 29840,   | 1626814, | 2063.1828, | 29878,   | 1659020, | 2060.8296, | 29916,   | 1691684, | 2058.4764, |
| 5.155972 |          |            | 5.150091 |          |            | 5.144210 |          |            |
| 29841,   | 1628086, | 2063.1209, | 29879,   | 1660314, | 2060.7677, | 29917,   | 1693578, | 2058.4144, |
| 5.155817 |          |            | 5.149936 |          |            | 5.144056 |          |            |
| 29842,   | 1628556, | 2063.0590, | 29880,   | 1660502, | 2060.7057, | 29918,   | 1693658, | 2058.3525, |
| 5.155662 |          |            | 5.149782 |          |            | 5.143901 |          |            |
| 29843,   | 1628824, | 2062.9970, | 29881,   | 1660016, | 2060.6438, | 29919,   | 1692828, | 2058.2906, |
| 5.155508 |          |            | 5.149627 |          |            | 5.143746 |          |            |
| 29844,   | 1630026, | 2062.9351, | 29882,   | 1660070, | 2060.5819, | 29920,   | 1692884, | 2058.2287, |
| 5.155353 |          |            | 5.149472 |          |            | 5.143591 |          |            |
| 29845,   | 1632474, | 2062.8732, | 29883,   | 1661168, | 2060.5200, | 29921,   | 1694490, | 2058.1667, |
| 5.155198 |          |            | 5.149317 |          |            | 5.143437 |          |            |
| 29846,   | 1635040, | 2062.8112, | 29884,   | 1662514, | 2060.4580, | 29922,   | 1696428, | 2058.1048, |
| 5.155043 |          |            | 5.149163 |          |            | 5.143282 |          |            |
| 29847,   | 1636262, | 2062.7493, | 29885,   | 1663046, | 2060.3961, | 29923,   | 1697074, | 2058.0429, |
| 5.154889 |          |            | 5.149008 |          |            | 5.143127 |          |            |
| 29848,   | 1635886, | 2062.6874, | 29886,   | 1662788, | 2060.3342, | 29924,   | 1696304, | 2057.9809, |
| 5.154734 |          |            | 5.148853 |          |            | 5.142972 |          |            |
| 29849,   | 1635146, | 2062.6255, | 29887,   | 1662856, | 2060.2722, | 29925,   | 1695618, | 2057.9190, |
| 5.154579 |          |            | 5.148698 |          |            | 5.142818 |          |            |
| 29850,   | 1635374, | 2062.5635, | 29888,   | 1664060, | 2060.2103, | 29926,   | 1696382, | 2057.8571, |
| 5.154424 |          |            | 5.148544 |          |            | 5.142663 |          |            |
| 29851,   | 1636582, | 2062.5016, | 29889,   | 1665842, | 2060.1484, | 29927,   | 1698268, | 2057.7952, |
| 5.154270 |          |            | 5.148389 |          |            | 5.142508 |          |            |
| 29852,   | 1637616, | 2062.4397, | 29890,   | 1666872, | 2060.0865, | 29928,   | 1699692, | 2057.7332, |
| 5.154115 |          |            | 5.148234 |          |            | 5.142353 |          |            |
| 29853,   | 1637660, | 2062.3778, | 29891,   | 1666700, | 2060.0245, | 29929,   | 1699724, | 2057.6713, |
| 5.153960 |          |            | 5.148079 |          |            | 5.142199 |          |            |
| 29854,   | 1637294, | 2062.3158, | 29892,   | 1666414, | 2059.9626, | 29930,   | 1699166, | 2057.6094, |
| 5.153805 |          |            | 5.147925 |          |            | 5.142044 |          |            |
| 29855,   | 1637796, | 2062.2539, | 29893,   | 1667504, | 2059.9007, | 29931,   | 1699548, | 2057.5475, |
| 5.153651 |          |            | 5.147770 |          |            | 5.141889 |          |            |
| 29856,   | 1639574, | 2062.1920, | 29894,   | 1670098, | 2059.8388, | 29932,   | 1701326, | 2057.4855, |
| 5.153496 |          |            | 5.147615 |          |            | 5.141734 |          |            |
| 29857,   | 1641606, | 2062.1301, | 29895,   | 1672744, | 2059.7768, | 29933,   | 1703368, | 2057.4236, |
| 5.153341 |          |            | 5.147460 |          |            | 5.141580 |          |            |
| 29858,   | 1642610, | 2062.0681, | 29896,   | 1673932, | 2059.7149, | 29934,   | 1704346, | 2057.3617, |
| 5.153186 |          |            | 5.147306 |          |            | 5.141425 |          |            |
| 29859,   | 1642520, | 2062.0062, | 29897,   | 1673680, | 2059.6530, | 29935,   | 1704290, | 2057.2998, |
| 5.153032 |          |            | 5.147151 |          |            | 5.141270 |          |            |
| 29860,   | 1642544, | 2061.9443, | 29898,   | 1673352, | 2059.5910, | 29936,   | 1704446, | 2057.2378, |
| 5.152877 |          |            | 5.146996 |          |            | 5.141115 |          |            |
| 29861,   | 1643688, | 2061.8823, | 29899,   | 1674020, | 2059.5291, | 29937,   | 1705698, | 2057.1759, |
| 5.152722 |          |            | 5.146841 |          |            | 5.140960 |          |            |
| 29862,   | 1645546, | 2061.8204, | 29900,   | 1675316, | 2059.4672, | 29938,   | 1707466, | 2057.1140, |
| 5.152567 |          |            | 5.146687 |          |            | 5.140806 |          |            |
| 29863,   | 1646762, | 2061.7585, | 29901,   | 1676130, | 2059.4053, | 29939,   | 1708454, | 2057.0520, |
| 5.152413 |          |            | 5.146532 |          |            | 5.140651 |          |            |
| 29864,   | 1646652, | 2061.6966, | 29902,   | 1676166, | 2059.3433, | 29940,   | 1708302, | 2056.9901, |
| 5.152258 |          |            | 5.146377 |          |            | 5.140496 |          |            |
| 29865,   | 1646036, | 2061.6346, | 29903,   | 1676428, | 2059.2814, | 29941,   | 1708116, | 2056.9282, |
| 5.152103 |          |            | 5.146222 |          |            | 5.140341 |          |            |
| 29866,   | 1646310, | 2061.5727, | 29904,   | 1677978, | 2059.2195, | 29942,   | 1709156, | 2056.8663, |
| 5.151948 |          |            | 5.146067 |          |            | 5.140187 |          |            |
| 29867,   | 1647858, | 2061.5108, | 29905,   | 1680490, | 2059.1576, | 29943,   | 1711310, | 2056.8043, |
| 5.151794 |          |            | 5.145913 |          |            | 5.140032 |          |            |
| 29868,   | 1649688, | 2061.4489, | 29906,   | 1682430, | 2059.0956, | 29944,   | 1713146, | 2056.7424, |
| 5.151639 |          |            | 5.145758 |          |            | 5.139877 |          |            |
| 29869,   | 1650710, | 2061.3869, | 29907,   | 1682772, | 2059.0337, | 29945,   | 1713536, | 2056.6805, |
| 5.151484 |          |            | 5.145603 |          |            | 5.139722 |          |            |
| 29870,   | 1651034, | 2061.3250, | 29908,   | 1682196, | 2058.9718, | 29946,   | 1712960, | 2056.6186, |
| 5.151329 |          |            | 5.145448 |          |            | 5.139568 |          |            |
| 29871,   | 1651800, | 2061.2631, | 29909,   | 1682342, | 2058.9099, | 29947,   | 1712890, | 2056.5566, |
| 5.151174 |          |            | 5.145294 |          |            | 5.139413 |          |            |
| 29872,   | 1653666, | 2061.2011, | 29910,   | 1683932, | 2058.8479, | 29948,   | 1714036, | 2056.4947, |
| 5.151020 |          |            | 5.145139 |          |            | 5.139258 |          |            |
| 29873,   | 1655926, | 2061.1392, | 29911,   | 1685992, | 2058.7860, | 29949,   | 1715556, | 2056.4328, |
| 5.150865 |          |            | 5.144984 |          |            | 5.139103 |          |            |
| 29874,   | 1657252, | 2061.0773, | 29912,   | 1687076, | 2058.7241, | 29950,   | 1716168, | 2056.3708, |
| 5.150710 |          |            | 5.144829 |          |            | 5.138949 |          |            |
| 29875,   | 1657254, | 2061.0154, | 29913,   | 1687050, | 2058.6621, | 29951,   | 1715768, | 2056.3089, |
| 5.150555 |          |            | 5.144675 |          |            | 5.138794 |          |            |
| 29876,   | 1656934, | 2060.9534, | 29914,   | 1687290, | 2058.6002, | 29952,   | 1715670, | 2056.2470, |
| 5.150401 |          |            | 5.144520 |          |            | 5.138639 |          |            |

|          |          |            |          |          |            |          |          |            |
|----------|----------|------------|----------|----------|------------|----------|----------|------------|
| 29953,   | 1717056, | 2056.1851, | 29991,   | 1754226, | 2053.8318, | 30029,   | 1788474, | 2051.4786, |
| 5.138484 |          |            | 5.132604 |          |            | 5.126723 |          |            |
| 29954,   | 1719556, | 2056.1231, | 29992,   | 1756436, | 2053.7699, | 30030,   | 1790402, | 2051.4167, |
| 5.138330 |          |            | 5.132449 |          |            | 5.126568 |          |            |
| 29955,   | 1721622, | 2056.0612, | 29993,   | 1758028, | 2053.7080, | 30031,   | 1791544, | 2051.3548, |
| 5.138175 |          |            | 5.132294 |          |            | 5.126413 |          |            |
| 29956,   | 1722250, | 2055.9993, | 29994,   | 1758246, | 2053.6461, | 30032,   | 1791544, | 2051.2928, |
| 5.138020 |          |            | 5.132139 |          |            | 5.126258 |          |            |
| 29957,   | 1722090, | 2055.9374, | 29995,   | 1758018, | 2053.5841, | 30033,   | 1791460, | 2051.2309, |
| 5.137865 |          |            | 5.131985 |          |            | 5.126104 |          |            |
| 29958,   | 1722590, | 2055.8754, | 29996,   | 1758774, | 2053.5222, | 30034,   | 1792508, | 2051.1690, |
| 5.137711 |          |            | 5.131830 |          |            | 5.125949 |          |            |
| 29959,   | 1724330, | 2055.8135, | 29997,   | 1760722, | 2053.4603, | 30035,   | 1794588, | 2051.1071, |
| 5.137556 |          |            | 5.131675 |          |            | 5.125794 |          |            |
| 29960,   | 1726410, | 2055.7516, | 29998,   | 1762630, | 2053.3984, | 30036,   | 1796428, | 2051.0451, |
| 5.137401 |          |            | 5.131520 |          |            | 5.125639 |          |            |
| 29961,   | 1727646, | 2055.6897, | 29999,   | 1763406, | 2053.3364, | 30037,   | 1797176, | 2050.9832, |
| 5.137246 |          |            | 5.131366 |          |            | 5.125485 |          |            |
| 29962,   | 1727976, | 2055.6277, | 30000,   | 1763446, | 2053.2745, | 30038,   | 1797522, | 2050.9213, |
| 5.137092 |          |            | 5.131211 |          |            | 5.125330 |          |            |
| 29963,   | 1728442, | 2055.5658, | 30001,   | 1764144, | 2053.2126, | 30039,   | 1798918, | 2050.8594, |
| 5.136937 |          |            | 5.131056 |          |            | 5.125175 |          |            |
| 29964,   | 1729760, | 2055.5039, | 30002,   | 1766102, | 2053.1506, | 30040,   | 1801746, | 2050.7974, |
| 5.136782 |          |            | 5.130901 |          |            | 5.125020 |          |            |
| 29965,   | 1731408, | 2055.4419, | 30003,   | 1768286, | 2053.0887, | 30041,   | 1804682, | 2050.7355, |
| 5.136627 |          |            | 5.130746 |          |            | 5.124866 |          |            |
| 29966,   | 1732294, | 2055.3800, | 30004,   | 1769168, | 2053.0268, | 30042,   | 1806038, | 2050.6736, |
| 5.136473 |          |            | 5.130592 |          |            | 5.124711 |          |            |
| 29967,   | 1732276, | 2055.3181, | 30005,   | 1768584, | 2052.9649, | 30043,   | 1805614, | 2050.6116, |
| 5.136318 |          |            | 5.130437 |          |            | 5.124556 |          |            |
| 29968,   | 1732540, | 2055.2562, | 30006,   | 1768056, | 2052.9029, | 30044,   | 1804870, | 2050.5497, |
| 5.136163 |          |            | 5.130282 |          |            | 5.124401 |          |            |
| 29969,   | 1734268, | 2055.1942, | 30007,   | 1769108, | 2052.8410, | 30045,   | 1805246, | 2050.4878, |
| 5.136008 |          |            | 5.130127 |          |            | 5.124247 |          |            |
| 29970,   | 1737144, | 2055.1323, | 30008,   | 1771510, | 2052.7791, | 30046,   | 1806632, | 2050.4259, |
| 5.135853 |          |            | 5.129973 |          |            | 5.124092 |          |            |
| 29971,   | 1739510, | 2055.0704, | 30009,   | 1773536, | 2052.7172, | 30047,   | 1807720, | 2050.3639, |
| 5.135699 |          |            | 5.129818 |          |            | 5.123937 |          |            |
| 29972,   | 1740092, | 2055.0085, | 30010,   | 1773896, | 2052.6552, | 30048,   | 1807822, | 2050.3020, |
| 5.135544 |          |            | 5.129663 |          |            | 5.123782 |          |            |
| 29973,   | 1739372, | 2054.9465, | 30011,   | 1773158, | 2052.5933, | 30049,   | 1807800, | 2050.2401, |
| 5.135389 |          |            | 5.129508 |          |            | 5.123628 |          |            |
| 29974,   | 1738988, | 2054.8846, | 30012,   | 1772996, | 2052.5314, | 30050,   | 1809066, | 2050.1782, |
| 5.135234 |          |            | 5.129354 |          |            | 5.123473 |          |            |
| 29975,   | 1739926, | 2054.8227, | 30013,   | 1774184, | 2052.4695, | 30051,   | 1811728, | 2050.1162, |
| 5.135080 |          |            | 5.129199 |          |            | 5.123318 |          |            |
| 29976,   | 1741558, | 2054.7607, | 30014,   | 1775778, | 2052.4075, | 30052,   | 1814262, | 2050.0543, |
| 5.134925 |          |            | 5.129044 |          |            | 5.123163 |          |            |
| 29977,   | 1742620, | 2054.6988, | 30015,   | 1776348, | 2052.3456, | 30053,   | 1815156, | 2049.9924, |
| 5.134770 |          |            | 5.128889 |          |            | 5.123009 |          |            |
| 29978,   | 1742804, | 2054.6369, | 30016,   | 1775800, | 2052.2837, | 30054,   | 1814638, | 2049.9305, |
| 5.134615 |          |            | 5.128735 |          |            | 5.122854 |          |            |
| 29979,   | 1743098, | 2054.5750, | 30017,   | 1775566, | 2052.2217, | 30055,   | 1814458, | 2049.8685, |
| 5.134461 |          |            | 5.128580 |          |            | 5.122699 |          |            |
| 29980,   | 1744466, | 2054.5130, | 30018,   | 1776922, | 2052.1598, | 30056,   | 1815870, | 2049.8066, |
| 5.134306 |          |            | 5.128425 |          |            | 5.122544 |          |            |
| 29981,   | 1746570, | 2054.4511, | 30019,   | 1779448, | 2052.0979, | 30057,   | 1818212, | 2049.7447, |
| 5.134151 |          |            | 5.128270 |          |            | 5.122390 |          |            |
| 29982,   | 1748124, | 2054.3892, | 30020,   | 1781440, | 2052.0360, | 30058,   | 1819688, | 2049.6827, |
| 5.133996 |          |            | 5.128116 |          |            | 5.122235 |          |            |
| 29983,   | 1748512, | 2054.3273, | 30021,   | 1781856, | 2051.9740, | 30059,   | 1819454, | 2049.6208, |
| 5.133842 |          |            | 5.127961 |          |            | 5.122080 |          |            |
| 29984,   | 1748592, | 2054.2653, | 30022,   | 1781412, | 2051.9121, | 30060,   | 1818592, | 2049.5589, |
| 5.133687 |          |            | 5.127806 |          |            | 5.121925 |          |            |
| 29985,   | 1749692, | 2054.2034, | 30023,   | 1781698, | 2051.8502, | 30061,   | 1818844, | 2049.4970, |
| 5.133532 |          |            | 5.127651 |          |            | 5.121771 |          |            |
| 29986,   | 1751924, | 2054.1415, | 30024,   | 1783326, | 2051.7883, | 30062,   | 1820638, | 2049.4350, |
| 5.133377 |          |            | 5.127497 |          |            | 5.121616 |          |            |
| 29987,   | 1753914, | 2054.0796, | 30025,   | 1785326, | 2051.7263, | 30063,   | 1822706, | 2049.3731, |
| 5.133223 |          |            | 5.127342 |          |            | 5.121461 |          |            |
| 29988,   | 1754334, | 2054.0176, | 30026,   | 1786426, | 2051.6644, | 30064,   | 1823662, | 2049.3112, |
| 5.133068 |          |            | 5.127187 |          |            | 5.121306 |          |            |
| 29989,   | 1753480, | 2053.9557, | 30027,   | 1786606, | 2051.6025, | 30065,   | 1823608, | 2049.2493, |
| 5.132913 |          |            | 5.127032 |          |            | 5.121151 |          |            |
| 29990,   | 1753044, | 2053.8938, | 30028,   | 1787018, | 2051.5406, | 30066,   | 1823886, | 2049.1873, |
| 5.132758 |          |            | 5.126878 |          |            | 5.120997 |          |            |

|          |          |            |          |          |            |          |          |            |
|----------|----------|------------|----------|----------|------------|----------|----------|------------|
| 30067,   | 1825334, | 2049.1254, | 30105,   | 1862266, | 2046.7722, | 30143,   | 1903546, | 2044.4190, |
| 5.120842 |          |            | 5.114961 |          |            | 5.109080 |          |            |
| 30068,   | 1827220, | 2049.0635, | 30106,   | 1864458, | 2046.7103, | 30144,   | 1905660, | 2044.3570, |
| 5.120687 |          |            | 5.114806 |          |            | 5.108926 |          |            |
| 30069,   | 1828158, | 2049.0015, | 30107,   | 1865590, | 2046.6483, | 30145,   | 1906388, | 2044.2951, |
| 5.120532 |          |            | 5.114652 |          |            | 5.108771 |          |            |
| 30070,   | 1827846, | 2048.9396, | 30108,   | 1865528, | 2046.5864, | 30146,   | 1905884, | 2044.2332, |
| 5.120378 |          |            | 5.114497 |          |            | 5.108616 |          |            |
| 30071,   | 1827492, | 2048.8777, | 30109,   | 1865492, | 2046.5245, | 30147,   | 1905802, | 2044.1712, |
| 5.120223 |          |            | 5.114342 |          |            | 5.108461 |          |            |
| 30072,   | 1828396, | 2048.8158, | 30110,   | 1866552, | 2046.4625, | 30148,   | 1907408, | 2044.1093, |
| 5.120068 |          |            | 5.114187 |          |            | 5.108307 |          |            |
| 30073,   | 1830378, | 2048.7538, | 30111,   | 1868324, | 2046.4006, | 30149,   | 1910098, | 2044.0474, |
| 5.119913 |          |            | 5.114033 |          |            | 5.108152 |          |            |
| 30074,   | 1832010, | 2048.6919, | 30112,   | 1869442, | 2046.3387, | 30150,   | 1912122, | 2043.9855, |
| 5.119759 |          |            | 5.113878 |          |            | 5.107997 |          |            |
| 30075,   | 1832360, | 2048.6300, | 30113,   | 1869238, | 2046.2768, | 30151,   | 1912614, | 2043.9235, |
| 5.119604 |          |            | 5.113723 |          |            | 5.107842 |          |            |
| 30076,   | 1832210, | 2048.5681, | 30114,   | 1868618, | 2046.2148, | 30152,   | 1912526, | 2043.8616, |
| 5.119449 |          |            | 5.113568 |          |            | 5.107688 |          |            |
| 30077,   | 1833178, | 2048.5061, | 30115,   | 1869046, | 2046.1529, | 30153,   | 1913386, | 2043.7997, |
| 5.119294 |          |            | 5.113414 |          |            | 5.107533 |          |            |
| 30078,   | 1835822, | 2048.4442, | 30116,   | 1870850, | 2046.0910, | 30154,   | 1915438, | 2043.7378, |
| 5.119140 |          |            | 5.113259 |          |            | 5.107378 |          |            |
| 30079,   | 1838896, | 2048.3823, | 30117,   | 1872884, | 2046.0291, | 30155,   | 1917360, | 2043.6758, |
| 5.118985 |          |            | 5.113104 |          |            | 5.107223 |          |            |
| 30080,   | 1840720, | 2048.3204, | 30118,   | 1873926, | 2045.9671, | 30156,   | 1917938, | 2043.6139, |
| 5.118830 |          |            | 5.112949 |          |            | 5.107069 |          |            |
| 30081,   | 1841040, | 2048.2584, | 30119,   | 1874096, | 2045.9052, | 30157,   | 1917586, | 2043.5520, |
| 5.118675 |          |            | 5.112795 |          |            | 5.106914 |          |            |
| 30082,   | 1841232, | 2048.1965, | 30120,   | 1874612, | 2045.8433, | 30158,   | 1917882, | 2043.4901, |
| 5.118521 |          |            | 5.112640 |          |            | 5.106759 |          |            |
| 30083,   | 1842614, | 2048.1346, | 30121,   | 1876184, | 2045.7813, | 30159,   | 1919664, | 2043.4281, |
| 5.118366 |          |            | 5.112485 |          |            | 5.106604 |          |            |
| 30084,   | 1844938, | 2048.0726, | 30122,   | 1878092, | 2045.7194, | 30160,   | 1921998, | 2043.3662, |
| 5.118211 |          |            | 5.112330 |          |            | 5.106450 |          |            |
| 30085,   | 1846748, | 2048.0107, | 30123,   | 1879082, | 2045.6575, | 30161,   | 1923272, | 2043.3043, |
| 5.118056 |          |            | 5.112176 |          |            | 5.106295 |          |            |
| 30086,   | 1847160, | 2047.9488, | 30124,   | 1879018, | 2045.5956, | 30162,   | 1923122, | 2043.2423, |
| 5.117902 |          |            | 5.112021 |          |            | 5.106140 |          |            |
| 30087,   | 1846930, | 2047.8869, | 30125,   | 1879198, | 2045.5336, | 30163,   | 1922858, | 2043.1804, |
| 5.117747 |          |            | 5.111866 |          |            | 5.105985 |          |            |
| 30088,   | 1847488, | 2047.8249, | 30126,   | 1880868, | 2045.4717, | 30164,   | 1923880, | 2043.1185, |
| 5.117592 |          |            | 5.111711 |          |            | 5.105830 |          |            |
| 30089,   | 1849204, | 2047.7630, | 30127,   | 1883662, | 2045.4098, | 30165,   | 1925938, | 2043.0566, |
| 5.117437 |          |            | 5.111557 |          |            | 5.105676 |          |            |
| 30090,   | 1850954, | 2047.7011, | 30128,   | 1885898, | 2045.3479, | 30166,   | 1927428, | 2042.9946, |
| 5.117283 |          |            | 5.111402 |          |            | 5.105521 |          |            |
| 30091,   | 1851498, | 2047.6392, | 30129,   | 1886460, | 2045.2859, | 30167,   | 1927334, | 2042.9327, |
| 5.117128 |          |            | 5.111247 |          |            | 5.105366 |          |            |
| 30092,   | 1851010, | 2047.5772, | 30130,   | 1886096, | 2045.2240, | 30168,   | 1926560, | 2042.8708, |
| 5.116973 |          |            | 5.111092 |          |            | 5.105211 |          |            |
| 30093,   | 1850882, | 2047.5153, | 30131,   | 1886564, | 2045.1621, | 30169,   | 1926938, | 2042.8089, |
| 5.116818 |          |            | 5.110937 |          |            | 5.105057 |          |            |
| 30094,   | 1852096, | 2047.4534, | 30132,   | 1888604, | 2045.1002, | 30170,   | 1929128, | 2042.7469, |
| 5.116664 |          |            | 5.110783 |          |            | 5.104902 |          |            |
| 30095,   | 1854086, | 2047.3914, | 30133,   | 1891116, | 2045.0382, | 30171,   | 1931818, | 2042.6850, |
| 5.116509 |          |            | 5.110628 |          |            | 5.104747 |          |            |
| 30096,   | 1855448, | 2047.3295, | 30134,   | 1892526, | 2044.9763, | 30172,   | 1933218, | 2042.6231, |
| 5.116354 |          |            | 5.110473 |          |            | 5.104592 |          |            |
| 30097,   | 1855644, | 2047.2676, | 30135,   | 1892676, | 2044.9144, | 30173,   | 1933126, | 2042.5611, |
| 5.116199 |          |            | 5.110318 |          |            | 5.104438 |          |            |
| 30098,   | 1855580, | 2047.2057, | 30136,   | 1893032, | 2044.8524, | 30174,   | 1933094, | 2042.4992, |
| 5.116044 |          |            | 5.110164 |          |            | 5.104283 |          |            |
| 30099,   | 1856454, | 2047.1437, | 30137,   | 1894928, | 2044.7905, | 30175,   | 1934542, | 2042.4373, |
| 5.115890 |          |            | 5.110009 |          |            | 5.104128 |          |            |
| 30100,   | 1858242, | 2047.0818, | 30138,   | 1897918, | 2044.7286, | 30176,   | 1937070, | 2042.3754, |
| 5.115735 |          |            | 5.109854 |          |            | 5.103973 |          |            |
| 30101,   | 1859744, | 2047.0199, | 30139,   | 1900270, | 2044.6667, | 30177,   | 1938974, | 2042.3134, |
| 5.115580 |          |            | 5.109699 |          |            | 5.103819 |          |            |
| 30102,   | 1860084, | 2046.9580, | 30140,   | 1900952, | 2044.6047, | 30178,   | 1939324, | 2042.2515, |
| 5.115425 |          |            | 5.109545 |          |            | 5.103664 |          |            |
| 30103,   | 1859840, | 2046.8960, | 30141,   | 1900802, | 2044.5428, | 30179,   | 1939172, | 2042.1896, |
| 5.115271 |          |            | 5.109390 |          |            | 5.103509 |          |            |
| 30104,   | 1860392, | 2046.8341, | 30142,   | 1901506, | 2044.4809, | 30180,   | 1940338, | 2042.1277, |
| 5.115116 |          |            | 5.109235 |          |            | 5.103354 |          |            |

|          |          |            |          |          |            |          |          |            |
|----------|----------|------------|----------|----------|------------|----------|----------|------------|
| 30181,   | 1943234, | 2042.0657, | 30219,   | 1985276, | 2039.7125, | 30257,   | 2027242, | 2037.3593, |
| 5.103200 |          |            | 5.097319 |          |            | 5.091438 |          |            |
| 30182,   | 1946264, | 2042.0038, | 30220,   | 1986780, | 2039.6506, | 30258,   | 2029092, | 2037.2974, |
| 5.103045 |          |            | 5.097164 |          |            | 5.091283 |          |            |
| 30183,   | 1947562, | 2041.9419, | 30221,   | 1987014, | 2039.5887, | 30259,   | 2029836, | 2037.2354, |
| 5.102890 |          |            | 5.097009 |          |            | 5.091129 |          |            |
| 30184,   | 1947012, | 2041.8800, | 30222,   | 1986634, | 2039.5267, | 30260,   | 2029986, | 2037.1735, |
| 5.102735 |          |            | 5.096855 |          |            | 5.090974 |          |            |
| 30185,   | 1946330, | 2041.8180, | 30223,   | 1987172, | 2039.4648, | 30261,   | 2030866, | 2037.1116, |
| 5.102581 |          |            | 5.096700 |          |            | 5.090819 |          |            |
| 30186,   | 1947088, | 2041.7561, | 30224,   | 1989332, | 2039.4029, | 30262,   | 2032920, | 2037.0497, |
| 5.102426 |          |            | 5.096545 |          |            | 5.090664 |          |            |
| 30187,   | 1949058, | 2041.6942, | 30225,   | 1992146, | 2039.3409, | 30263,   | 2035044, | 2036.9877, |
| 5.102271 |          |            | 5.096390 |          |            | 5.090509 |          |            |
| 30188,   | 1950688, | 2041.6322, | 30226,   | 1994096, | 2039.2790, | 30264,   | 2035914, | 2036.9258, |
| 5.102116 |          |            | 5.096236 |          |            | 5.090355 |          |            |
| 30189,   | 1951086, | 2041.5703, | 30227,   | 1994790, | 2039.2171, | 30265,   | 2035628, | 2036.8639, |
| 5.101962 |          |            | 5.096081 |          |            | 5.090200 |          |            |
| 30190,   | 1951056, | 2041.5084, | 30228,   | 1995294, | 2039.1552, | 30266,   | 2035666, | 2036.8019, |
| 5.101807 |          |            | 5.095926 |          |            | 5.090045 |          |            |
| 30191,   | 1952030, | 2041.4465, | 30229,   | 1996668, | 2039.0932, | 30267,   | 2037164, | 2036.7400, |
| 5.101652 |          |            | 5.095771 |          |            | 5.089890 |          |            |
| 30192,   | 1954278, | 2041.3845, | 30230,   | 1998596, | 2039.0313, | 30268,   | 2039578, | 2036.6781, |
| 5.101497 |          |            | 5.095616 |          |            | 5.089736 |          |            |
| 30193,   | 1956528, | 2041.3226, | 30231,   | 1999766, | 2038.9694, | 30269,   | 2041374, | 2036.6162, |
| 5.101343 |          |            | 5.095462 |          |            | 5.089581 |          |            |
| 30194,   | 1957466, | 2041.2607, | 30232,   | 1999570, | 2038.9075, | 30270,   | 2041954, | 2036.5542, |
| 5.101188 |          |            | 5.095307 |          |            | 5.089426 |          |            |
| 30195,   | 1957260, | 2041.1988, | 30233,   | 1999012, | 2038.8455, | 30271,   | 2042444, | 2036.4923, |
| 5.101033 |          |            | 5.095152 |          |            | 5.089271 |          |            |
| 30196,   | 1957314, | 2041.1368, | 30234,   | 1999614, | 2038.7836, | 30272,   | 2044330, | 2036.4304, |
| 5.100878 |          |            | 5.094997 |          |            | 5.089117 |          |            |
| 30197,   | 1958564, | 2041.0749, | 30235,   | 2001616, | 2038.7217, | 30273,   | 2047550, | 2036.3685, |
| 5.100723 |          |            | 5.094843 |          |            | 5.088962 |          |            |
| 30198,   | 1960428, | 2041.0130, | 30236,   | 2003592, | 2038.6598, | 30274,   | 2050324, | 2036.3065, |
| 5.100569 |          |            | 5.094688 |          |            | 5.088807 |          |            |
| 30199,   | 1961606, | 2040.9510, | 30237,   | 2004096, | 2038.5978, | 30275,   | 2051100, | 2036.2446, |
| 5.100414 |          |            | 5.094533 |          |            | 5.088652 |          |            |
| 30200,   | 1961724, | 2040.8891, | 30238,   | 2003348, | 2038.5359, | 30276,   | 2050310, | 2036.1827, |
| 5.100259 |          |            | 5.094378 |          |            | 5.088498 |          |            |
| 30201,   | 1961810, | 2040.8272, | 30239,   | 2003040, | 2038.4740, | 30277,   | 2049924, | 2036.1208, |
| 5.100104 |          |            | 5.094224 |          |            | 5.088343 |          |            |
| 30202,   | 1963048, | 2040.7653, | 30240,   | 2004420, | 2038.4120, | 30278,   | 2051236, | 2036.0588, |
| 5.099950 |          |            | 5.094069 |          |            | 5.088188 |          |            |
| 30203,   | 1965374, | 2040.7033, | 30241,   | 2006880, | 2038.3501, | 30279,   | 2053468, | 2035.9969, |
| 5.099795 |          |            | 5.093914 |          |            | 5.088033 |          |            |
| 30204,   | 1967606, | 2040.6414, | 30242,   | 2008722, | 2038.2882, | 30280,   | 2054752, | 2035.9350, |
| 5.099640 |          |            | 5.093759 |          |            | 5.087879 |          |            |
| 30205,   | 1968920, | 2040.5795, | 30243,   | 2009186, | 2038.2263, | 30281,   | 2054378, | 2035.8730, |
| 5.099485 |          |            | 5.093605 |          |            | 5.087724 |          |            |
| 30206,   | 1969782, | 2040.5176, | 30244,   | 2009304, | 2038.1643, | 30282,   | 2053600, | 2035.8111, |
| 5.099331 |          |            | 5.093450 |          |            | 5.087569 |          |            |
| 30207,   | 1971204, | 2040.4556, | 30245,   | 2010604, | 2038.1024, | 30283,   | 2054148, | 2035.7492, |
| 5.099176 |          |            | 5.093295 |          |            | 5.087414 |          |            |
| 30208,   | 1973260, | 2040.3937, | 30246,   | 2013234, | 2038.0405, | 30284,   | 2056230, | 2035.6873, |
| 5.099021 |          |            | 5.093140 |          |            | 5.087260 |          |            |
| 30209,   | 1974780, | 2040.3318, | 30247,   | 2015724, | 2037.9786, | 30285,   | 2058410, | 2035.6253, |
| 5.098866 |          |            | 5.092986 |          |            | 5.087105 |          |            |
| 30210,   | 1974732, | 2040.2699, | 30248,   | 2016744, | 2037.9166, | 30286,   | 2059452, | 2035.5634, |
| 5.098712 |          |            | 5.092831 |          |            | 5.086950 |          |            |
| 30211,   | 1973610, | 2040.2079, | 30249,   | 2016716, | 2037.8547, | 30287,   | 2059870, | 2035.5015, |
| 5.098557 |          |            | 5.092676 |          |            | 5.086795 |          |            |
| 30212,   | 1973174, | 2040.1460, | 30250,   | 2017334, | 2037.7928, | 30288,   | 2061270, | 2035.4396, |
| 5.098402 |          |            | 5.092521 |          |            | 5.086641 |          |            |
| 30213,   | 1974656, | 2040.0841, | 30251,   | 2019594, | 2037.7309, | 30289,   | 2064306, | 2035.3776, |
| 5.098247 |          |            | 5.092367 |          |            | 5.086486 |          |            |
| 30214,   | 1977484, | 2040.0221, | 30252,   | 2022576, | 2037.6689, | 30290,   | 2067690, | 2035.3157, |
| 5.098093 |          |            | 5.092212 |          |            | 5.086331 |          |            |
| 30215,   | 1980006, | 2039.9602, | 30253,   | 2024512, | 2037.6070, | 30291,   | 2069508, | 2035.2538, |
| 5.097938 |          |            | 5.092057 |          |            | 5.086176 |          |            |
| 30216,   | 1981306, | 2039.8983, | 30254,   | 2024768, | 2037.5451, | 30292,   | 2069394, | 2035.1918, |
| 5.097783 |          |            | 5.091902 |          |            | 5.086021 |          |            |
| 30217,   | 1982032, | 2039.8364, | 30255,   | 2024520, | 2037.4831, | 30293,   | 2068922, | 2035.1299, |
| 5.097628 |          |            | 5.091748 |          |            | 5.085867 |          |            |
| 30218,   | 1983328, | 2039.7744, | 30256,   | 2025296, | 2037.4212, | 30294,   | 2069862, | 2035.0680, |
| 5.097474 |          |            | 5.091593 |          |            | 5.085712 |          |            |

|          |          |            |          |          |            |          |          |            |
|----------|----------|------------|----------|----------|------------|----------|----------|------------|
| 30295,   | 2072270, | 2035.0061, | 30333,   | 2120924, | 2032.6528, | 30371,   | 2167402, | 2030.2996, |
| 5.085557 |          |            | 5.079676 |          |            | 5.073796 |          |            |
| 30296,   | 2074640, | 2034.9441, | 30334,   | 2122812, | 2032.5909, | 30372,   | 2169770, | 2030.2377, |
| 5.085402 |          |            | 5.079522 |          |            | 5.073641 |          |            |
| 30297,   | 2075856, | 2034.8822, | 30335,   | 2122932, | 2032.5290, | 30373,   | 2170752, | 2030.1758, |
| 5.085248 |          |            | 5.079367 |          |            | 5.073486 |          |            |
| 30298,   | 2076520, | 2034.8203, | 30336,   | 2122552, | 2032.4671, | 30374,   | 2171476, | 2030.1138, |
| 5.085093 |          |            | 5.079212 |          |            | 5.073331 |          |            |
| 30299,   | 2078134, | 2034.7584, | 30337,   | 2123584, | 2032.4051, | 30375,   | 2173382, | 2030.0519, |
| 5.084938 |          |            | 5.079057 |          |            | 5.073177 |          |            |
| 30300,   | 2081130, | 2034.6964, | 30338,   | 2126468, | 2032.3432, | 30376,   | 2176378, | 2029.9900, |
| 5.084783 |          |            | 5.078903 |          |            | 5.073022 |          |            |
| 30301,   | 2084190, | 2034.6345, | 30339,   | 2129696, | 2032.2813, | 30377,   | 2178826, | 2029.9281, |
| 5.084629 |          |            | 5.078748 |          |            | 5.072867 |          |            |
| 30302,   | 2085706, | 2034.5726, | 30340,   | 2131614, | 2032.2194, | 30378,   | 2179446, | 2029.8661, |
| 5.084474 |          |            | 5.078593 |          |            | 5.072712 |          |            |
| 30303,   | 2085676, | 2034.5107, | 30341,   | 2132264, | 2032.1574, | 30379,   | 2178892, | 2029.8042, |
| 5.084319 |          |            | 5.078438 |          |            | 5.072558 |          |            |
| 30304,   | 2085720, | 2034.4487, | 30342,   | 2133202, | 2032.0955, | 30380,   | 2179122, | 2029.7423, |
| 5.084164 |          |            | 5.078284 |          |            | 5.072403 |          |            |
| 30305,   | 2087228, | 2034.3868, | 30343,   | 2135536, | 2032.0336, | 30381,   | 2181262, | 2029.6804, |
| 5.084010 |          |            | 5.078129 |          |            | 5.072248 |          |            |
| 30306,   | 2089802, | 2034.3249, | 30344,   | 2138528, | 2031.9716, | 30382,   | 2184414, | 2029.6184, |
| 5.083855 |          |            | 5.077974 |          |            | 5.072093 |          |            |
| 30307,   | 2091766, | 2034.2629, | 30345,   | 2140440, | 2031.9097, | 30383,   | 2186792, | 2029.5565, |
| 5.083700 |          |            | 5.077819 |          |            | 5.071939 |          |            |
| 30308,   | 2092146, | 2034.2010, | 30346,   | 2140548, | 2031.8478, | 30384,   | 2187750, | 2029.4946, |
| 5.083545 |          |            | 5.077665 |          |            | 5.071784 |          |            |
| 30309,   | 2091712, | 2034.1391, | 30347,   | 2139934, | 2031.7859, | 30385,   | 2188354, | 2029.4326, |
| 5.083391 |          |            | 5.077510 |          |            | 5.071629 |          |            |
| 30310,   | 2091934, | 2034.0772, | 30348,   | 2140134, | 2031.7239, | 30386,   | 2189894, | 2029.3707, |
| 5.083236 |          |            | 5.077355 |          |            | 5.071474 |          |            |
| 30311,   | 2093194, | 2034.0152, | 30349,   | 2141338, | 2031.6620, | 30387,   | 2192224, | 2029.3088, |
| 5.083081 |          |            | 5.077200 |          |            | 5.071320 |          |            |
| 30312,   | 2094440, | 2033.9533, | 30350,   | 2142296, | 2031.6001, | 30388,   | 2193956, | 2029.2469, |
| 5.082926 |          |            | 5.077046 |          |            | 5.071165 |          |            |
| 30313,   | 2094642, | 2033.8914, | 30351,   | 2142036, | 2031.5382, | 30389,   | 2194248, | 2029.1849, |
| 5.082772 |          |            | 5.076891 |          |            | 5.071010 |          |            |
| 30314,   | 2094208, | 2033.8295, | 30352,   | 2141186, | 2031.4762, | 30390,   | 2193958, | 2029.1230, |
| 5.082617 |          |            | 5.076736 |          |            | 5.070855 |          |            |
| 30315,   | 2094598, | 2033.7675, | 30353,   | 2141340, | 2031.4143, | 30391,   | 2194736, | 2029.0611, |
| 5.082462 |          |            | 5.076581 |          |            | 5.070700 |          |            |
| 30316,   | 2096502, | 2033.7056, | 30354,   | 2143136, | 2031.3524, | 30392,   | 2197084, | 2028.9992, |
| 5.082307 |          |            | 5.076427 |          |            | 5.070546 |          |            |
| 30317,   | 2098984, | 2033.6437, | 30355,   | 2145448, | 2031.2905, | 30393,   | 2199736, | 2028.9372, |
| 5.082153 |          |            | 5.076272 |          |            | 5.070391 |          |            |
| 30318,   | 2100492, | 2033.5817, | 30356,   | 2146676, | 2031.2285, | 30394,   | 2201112, | 2028.8753, |
| 5.081998 |          |            | 5.076117 |          |            | 5.070236 |          |            |
| 30319,   | 2100728, | 2033.5198, | 30357,   | 2146666, | 2031.1666, | 30395,   | 2201124, | 2028.8134, |
| 5.081843 |          |            | 5.075962 |          |            | 5.070081 |          |            |
| 30320,   | 2100972, | 2033.4579, | 30358,   | 2146938, | 2031.1047, | 30396,   | 2201206, | 2028.7514, |
| 5.081688 |          |            | 5.075807 |          |            | 5.069927 |          |            |
| 30321,   | 2102550, | 2033.3960, | 30359,   | 2148920, | 2031.0427, | 30397,   | 2202558, | 2028.6895, |
| 5.081534 |          |            | 5.075653 |          |            | 5.069772 |          |            |
| 30322,   | 2105176, | 2033.3340, | 30360,   | 2152258, | 2030.9808, | 30398,   | 2204738, | 2028.6276, |
| 5.081379 |          |            | 5.075498 |          |            | 5.069617 |          |            |
| 30323,   | 2107262, | 2033.2721, | 30361,   | 2155208, | 2030.9189, | 30399,   | 2206314, | 2028.5657, |
| 5.081224 |          |            | 5.075343 |          |            | 5.069462 |          |            |
| 30324,   | 2107796, | 2033.2102, | 30362,   | 2156564, | 2030.8570, | 30400,   | 2206670, | 2028.5037, |
| 5.081069 |          |            | 5.075188 |          |            | 5.069308 |          |            |
| 30325,   | 2107576, | 2033.1483, | 30363,   | 2156916, | 2030.7950, | 30401,   | 2206802, | 2028.4418, |
| 5.080914 |          |            | 5.075034 |          |            | 5.069153 |          |            |
| 30326,   | 2108294, | 2033.0863, | 30364,   | 2157740, | 2030.7331, | 30402,   | 2208090, | 2028.3799, |
| 5.080760 |          |            | 5.074879 |          |            | 5.068998 |          |            |
| 30327,   | 2110558, | 2033.0244, | 30365,   | 2159538, | 2030.6712, | 30403,   | 2210554, | 2028.3180, |
| 5.080605 |          |            | 5.074724 |          |            | 5.068843 |          |            |
| 30328,   | 2113196, | 2032.9625, | 30366,   | 2161294, | 2030.6093, | 30404,   | 2212786, | 2028.2560, |
| 5.080450 |          |            | 5.074569 |          |            | 5.068689 |          |            |
| 30329,   | 2114716, | 2032.9006, | 30367,   | 2161866, | 2030.5473, | 30405,   | 2213652, | 2028.1941, |
| 5.080295 |          |            | 5.074415 |          |            | 5.068534 |          |            |
| 30330,   | 2115102, | 2032.8386, | 30368,   | 2161596, | 2030.4854, | 30406,   | 2213720, | 2028.1322, |
| 5.080141 |          |            | 5.074260 |          |            | 5.068379 |          |            |
| 30331,   | 2115830, | 2032.7767, | 30369,   | 2162066, | 2030.4235, | 30407,   | 2214628, | 2028.0703, |
| 5.079986 |          |            | 5.074105 |          |            | 5.068224 |          |            |
| 30332,   | 2118004, | 2032.7148, | 30370,   | 2164266, | 2030.3615, | 30408,   | 2217076, | 2028.0083, |
| 5.079831 |          |            | 5.073950 |          |            | 5.068070 |          |            |

|          |          |            |          |          |            |          |          |            |
|----------|----------|------------|----------|----------|------------|----------|----------|------------|
| 30409,   | 2219878, | 2027.9464, | 30447,   | 2268206, | 2025.5932, | 30485,   | 2325130, | 2023.2400, |
| 5.067915 |          |            | 5.062034 |          |            | 5.056153 |          |            |
| 30410,   | 2221272, | 2027.8845, | 30448,   | 2270002, | 2025.5313, | 30486,   | 2326898, | 2023.1780, |
| 5.067760 |          |            | 5.061879 |          |            | 5.055999 |          |            |
| 30411,   | 2221000, | 2027.8225, | 30449,   | 2270386, | 2025.4693, | 30487,   | 2327240, | 2023.1161, |
| 5.067605 |          |            | 5.061725 |          |            | 5.055844 |          |            |
| 30412,   | 2220682, | 2027.7606, | 30450,   | 2270866, | 2025.4074, | 30488,   | 2327616, | 2023.0542, |
| 5.067451 |          |            | 5.061570 |          |            | 5.055689 |          |            |
| 30413,   | 2222022, | 2027.6987, | 30451,   | 2272700, | 2025.3455, | 30489,   | 2329380, | 2022.9922, |
| 5.067296 |          |            | 5.061415 |          |            | 5.055534 |          |            |
| 30414,   | 2224902, | 2027.6368, | 30452,   | 2275380, | 2025.2835, | 30490,   | 2332202, | 2022.9303, |
| 5.067141 |          |            | 5.061260 |          |            | 5.055379 |          |            |
| 30415,   | 2227580, | 2027.5748, | 30453,   | 2277244, | 2025.2216, | 30491,   | 2334484, | 2022.8684, |
| 5.066986 |          |            | 5.061106 |          |            | 5.055225 |          |            |
| 30416,   | 2228780, | 2027.5129, | 30454,   | 2277524, | 2025.1597, | 30492,   | 2335342, | 2022.8065, |
| 5.066832 |          |            | 5.060951 |          |            | 5.055070 |          |            |
| 30417,   | 2229124, | 2027.4510, | 30455,   | 2277338, | 2025.0978, | 30493,   | 2335636, | 2022.7445, |
| 5.066677 |          |            | 5.060796 |          |            | 5.054915 |          |            |
| 30418,   | 2230282, | 2027.3891, | 30456,   | 2278410, | 2025.0358, | 30494,   | 2336880, | 2022.6826, |
| 5.066522 |          |            | 5.060641 |          |            | 5.054760 |          |            |
| 30419,   | 2232866, | 2027.3271, | 30457,   | 2280972, | 2024.9739, | 30495,   | 2339372, | 2022.6207, |
| 5.066367 |          |            | 5.060486 |          |            | 5.054606 |          |            |
| 30420,   | 2235622, | 2027.2652, | 30458,   | 2283420, | 2024.9120, | 30496,   | 2341824, | 2022.5588, |
| 5.066213 |          |            | 5.060332 |          |            | 5.054451 |          |            |
| 30421,   | 2236920, | 2027.2033, | 30459,   | 2284210, | 2024.8501, | 30497,   | 2342932, | 2022.4968, |
| 5.066058 |          |            | 5.060177 |          |            | 5.054296 |          |            |
| 30422,   | 2236742, | 2027.1413, | 30460,   | 2283760, | 2024.7881, | 30498,   | 2342950, | 2022.4349, |
| 5.065903 |          |            | 5.060022 |          |            | 5.054141 |          |            |
| 30423,   | 2236818, | 2027.0794, | 30461,   | 2284100, | 2024.7262, | 30499,   | 2343404, | 2022.3730, |
| 5.065748 |          |            | 5.059867 |          |            | 5.053987 |          |            |
| 30424,   | 2238620, | 2027.0175, | 30462,   | 2286618, | 2024.6643, | 30500,   | 2345198, | 2022.3111, |
| 5.065593 |          |            | 5.059713 |          |            | 5.053832 |          |            |
| 30425,   | 2241648, | 2026.9556, | 30463,   | 2290468, | 2024.6023, | 30501,   | 2347554, | 2022.2491, |
| 5.065439 |          |            | 5.059558 |          |            | 5.053677 |          |            |
| 30426,   | 2243974, | 2026.8936, | 30464,   | 2293546, | 2024.5404, | 30502,   | 2348968, | 2022.1872, |
| 5.065284 |          |            | 5.059403 |          |            | 5.053522 |          |            |
| 30427,   | 2244406, | 2026.8317, | 30465,   | 2294842, | 2024.4785, | 30503,   | 2349104, | 2022.1253, |
| 5.065129 |          |            | 5.059248 |          |            | 5.053368 |          |            |
| 30428,   | 2243768, | 2026.7698, | 30466,   | 2295440, | 2024.4166, | 30504,   | 2349212, | 2022.0633, |
| 5.064974 |          |            | 5.059094 |          |            | 5.053213 |          |            |
| 30429,   | 2243818, | 2026.7079, | 30467,   | 2297062, | 2024.3546, | 30505,   | 2350636, | 2022.0014, |
| 5.064820 |          |            | 5.058939 |          |            | 5.053058 |          |            |
| 30430,   | 2245222, | 2026.6459, | 30468,   | 2299898, | 2024.2927, | 30506,   | 2353152, | 2021.9395, |
| 5.064665 |          |            | 5.058784 |          |            | 5.052903 |          |            |
| 30431,   | 2246920, | 2026.5840, | 30469,   | 2302372, | 2024.2308, | 30507,   | 2355234, | 2021.8776, |
| 5.064510 |          |            | 5.058629 |          |            | 5.052749 |          |            |
| 30432,   | 2247644, | 2026.5221, | 30470,   | 2303088, | 2024.1689, | 30508,   | 2355946, | 2021.8156, |
| 5.064355 |          |            | 5.058475 |          |            | 5.052594 |          |            |
| 30433,   | 2247626, | 2026.4602, | 30471,   | 2302592, | 2024.1069, | 30509,   | 2356160, | 2021.7537, |
| 5.064201 |          |            | 5.058320 |          |            | 5.052439 |          |            |
| 30434,   | 2248360, | 2026.3982, | 30472,   | 2302882, | 2024.0450, | 30510,   | 2357586, | 2021.6918, |
| 5.064046 |          |            | 5.058165 |          |            | 5.052284 |          |            |
| 30435,   | 2250766, | 2026.3363, | 30473,   | 2305160, | 2023.9831, | 30511,   | 2360688, | 2021.6299, |
| 5.063891 |          |            | 5.058010 |          |            | 5.052130 |          |            |
| 30436,   | 2253900, | 2026.2744, | 30474,   | 2308532, | 2023.9212, | 30512,   | 2364028, | 2021.5679, |
| 5.063736 |          |            | 5.057856 |          |            | 5.051975 |          |            |
| 30437,   | 2255924, | 2026.2124, | 30475,   | 2311106, | 2023.8592, | 30513,   | 2365854, | 2021.5060, |
| 5.063582 |          |            | 5.057701 |          |            | 5.051820 |          |            |
| 30438,   | 2256106, | 2026.1505, | 30476,   | 2312182, | 2023.7973, | 30514,   | 2366086, | 2021.4441, |
| 5.063427 |          |            | 5.057546 |          |            | 5.051665 |          |            |
| 30439,   | 2255582, | 2026.0886, | 30477,   | 2312902, | 2023.7354, | 30515,   | 2366386, | 2021.3821, |
| 5.063272 |          |            | 5.057391 |          |            | 5.051511 |          |            |
| 30440,   | 2256004, | 2026.0267, | 30478,   | 2314688, | 2023.6734, | 30516,   | 2368198, | 2021.3202, |
| 5.063117 |          |            | 5.057237 |          |            | 5.051356 |          |            |
| 30441,   | 2257660, | 2025.9647, | 30479,   | 2317392, | 2023.6115, | 30517,   | 2371120, | 2021.2583, |
| 5.062963 |          |            | 5.057082 |          |            | 5.051201 |          |            |
| 30442,   | 2259380, | 2025.9028, | 30480,   | 2319444, | 2023.5496, | 30518,   | 2373506, | 2021.1964, |
| 5.062808 |          |            | 5.056927 |          |            | 5.051046 |          |            |
| 30443,   | 2260200, | 2025.8409, | 30481,   | 2319792, | 2023.4877, | 30519,   | 2374534, | 2021.1344, |
| 5.062653 |          |            | 5.056772 |          |            | 5.050892 |          |            |
| 30444,   | 2260652, | 2025.7790, | 30482,   | 2319306, | 2023.4257, | 30520,   | 2375198, | 2021.0725, |
| 5.062498 |          |            | 5.056618 |          |            | 5.050737 |          |            |
| 30445,   | 2262126, | 2025.7170, | 30483,   | 2319852, | 2023.3638, | 30521,   | 2377046, | 2021.0106, |
| 5.062344 |          |            | 5.056463 |          |            | 5.050582 |          |            |
| 30446,   | 2265060, | 2025.6551, | 30484,   | 2322202, | 2023.3019, | 30522,   | 2380200, | 2020.9487, |
| 5.062189 |          |            | 5.056308 |          |            | 5.050427 |          |            |

|          |          |            |          |          |            |          |          |            |
|----------|----------|------------|----------|----------|------------|----------|----------|------------|
| 30523,   | 2383086, | 2020.8867, | 30561,   | 2439494, | 2018.5335, | 30599,   | 2500878, | 2016.1803, |
| 5.050272 |          |            | 5.044392 |          |            | 5.038511 |          |            |
| 30524,   | 2384296, | 2020.8248, | 30562,   | 2441422, | 2018.4716, | 30600,   | 2501778, | 2016.1184, |
| 5.050118 |          |            | 5.044237 |          |            | 5.038356 |          |            |
| 30525,   | 2384296, | 2020.7629, | 30563,   | 2442020, | 2018.4097, | 30601,   | 2501988, | 2016.0564, |
| 5.049963 |          |            | 5.044082 |          |            | 5.038201 |          |            |
| 30526,   | 2384964, | 2020.7010, | 30564,   | 2442952, | 2018.3477, | 30602,   | 2503330, | 2015.9945, |
| 5.049808 |          |            | 5.043927 |          |            | 5.038047 |          |            |
| 30527,   | 2387366, | 2020.6390, | 30565,   | 2445308, | 2018.2858, | 30603,   | 2506402, | 2015.9326, |
| 5.049653 |          |            | 5.043773 |          |            | 5.037892 |          |            |
| 30528,   | 2390462, | 2020.5771, | 30566,   | 2448262, | 2018.2239, | 30604,   | 2509766, | 2015.8707, |
| 5.049499 |          |            | 5.043618 |          |            | 5.037737 |          |            |
| 30529,   | 2392294, | 2020.5152, | 30567,   | 2450154, | 2018.1619, | 30605,   | 2511574, | 2015.8087, |
| 5.049344 |          |            | 5.043463 |          |            | 5.037582 |          |            |
| 30530,   | 2392302, | 2020.4532, | 30568,   | 2450584, | 2018.1000, | 30606,   | 2511754, | 2015.7468, |
| 5.049189 |          |            | 5.043308 |          |            | 5.037428 |          |            |
| 30531,   | 2392004, | 2020.3913, | 30569,   | 2450978, | 2018.0381, | 30607,   | 2512140, | 2015.6849, |
| 5.049034 |          |            | 5.043154 |          |            | 5.037273 |          |            |
| 30532,   | 2393248, | 2020.3294, | 30570,   | 2452902, | 2017.9762, | 30608,   | 2514352, | 2015.6229, |
| 5.048880 |          |            | 5.042999 |          |            | 5.037118 |          |            |
| 30533,   | 2396082, | 2020.2675, | 30571,   | 2456130, | 2017.9142, | 30609,   | 2517896, | 2015.5610, |
| 5.048725 |          |            | 5.042844 |          |            | 5.036963 |          |            |
| 30534,   | 2398748, | 2020.2055, | 30572,   | 2458834, | 2017.8523, | 30610,   | 2520734, | 2015.4991, |
| 5.048570 |          |            | 5.042689 |          |            | 5.036809 |          |            |
| 30535,   | 2399798, | 2020.1436, | 30573,   | 2459670, | 2017.7904, | 30611,   | 2521678, | 2015.4372, |
| 5.048415 |          |            | 5.042535 |          |            | 5.036654 |          |            |
| 30536,   | 2399774, | 2020.0817, | 30574,   | 2459306, | 2017.7285, | 30612,   | 2521756, | 2015.3752, |
| 5.048261 |          |            | 5.042380 |          |            | 5.036499 |          |            |
| 30537,   | 2400464, | 2020.0198, | 30575,   | 2459606, | 2017.6665, | 30613,   | 2522992, | 2015.3133, |
| 5.048106 |          |            | 5.042225 |          |            | 5.036344 |          |            |
| 30538,   | 2402666, | 2019.9578, | 30576,   | 2461454, | 2017.6046, | 30614,   | 2525996, | 2015.2514, |
| 5.047951 |          |            | 5.042070 |          |            | 5.036190 |          |            |
| 30539,   | 2405154, | 2019.8959, | 30577,   | 2463862, | 2017.5427, | 30615,   | 2529262, | 2015.1895, |
| 5.047796 |          |            | 5.041916 |          |            | 5.036035 |          |            |
| 30540,   | 2406156, | 2019.8340, | 30578,   | 2465360, | 2017.4808, | 30616,   | 2530974, | 2015.1275, |
| 5.047642 |          |            | 5.041761 |          |            | 5.035880 |          |            |
| 30541,   | 2405576, | 2019.7720, | 30579,   | 2465916, | 2017.4188, | 30617,   | 2531136, | 2015.0656, |
| 5.047487 |          |            | 5.041606 |          |            | 5.035725 |          |            |
| 30542,   | 2405276, | 2019.7101, | 30580,   | 2466996, | 2017.3569, | 30618,   | 2531564, | 2015.0037, |
| 5.047332 |          |            | 5.041451 |          |            | 5.035570 |          |            |
| 30543,   | 2407024, | 2019.6482, | 30581,   | 2469718, | 2017.2950, | 30619,   | 2533690, | 2014.9417, |
| 5.047177 |          |            | 5.041297 |          |            | 5.035416 |          |            |
| 30544,   | 2410474, | 2019.5863, | 30582,   | 2473304, | 2017.2330, | 30620,   | 2536870, | 2014.8798, |
| 5.047023 |          |            | 5.041142 |          |            | 5.035261 |          |            |
| 30545,   | 2413582, | 2019.5243, | 30583,   | 2475882, | 2017.1711, | 30621,   | 2539128, | 2014.8179, |
| 5.046868 |          |            | 5.040987 |          |            | 5.035106 |          |            |
| 30546,   | 2414898, | 2019.4624, | 30584,   | 2476664, | 2017.1092, | 30622,   | 2539476, | 2014.7560, |
| 5.046713 |          |            | 5.040832 |          |            | 5.034951 |          |            |
| 30547,   | 2415144, | 2019.4005, | 30585,   | 2476916, | 2017.0473, | 30623,   | 2539018, | 2014.6940, |
| 5.046558 |          |            | 5.040677 |          |            | 5.034797 |          |            |
| 30548,   | 2416186, | 2019.3386, | 30586,   | 2478510, | 2016.9853, | 30624,   | 2539608, | 2014.6321, |
| 5.046404 |          |            | 5.040523 |          |            | 5.034642 |          |            |
| 30549,   | 2418768, | 2019.2766, | 30587,   | 2481652, | 2016.9234, | 30625,   | 2541712, | 2014.5702, |
| 5.046249 |          |            | 5.040368 |          |            | 5.034487 |          |            |
| 30550,   | 2421704, | 2019.2147, | 30588,   | 2484566, | 2016.8615, | 30626,   | 2544050, | 2014.5083, |
| 5.046094 |          |            | 5.040213 |          |            | 5.034332 |          |            |
| 30551,   | 2423390, | 2019.1528, | 30589,   | 2485478, | 2016.7996, | 30627,   | 2545298, | 2014.4463, |
| 5.045939 |          |            | 5.040058 |          |            | 5.034178 |          |            |
| 30552,   | 2423850, | 2019.0909, | 30590,   | 2484672, | 2016.7376, | 30628,   | 2545790, | 2014.3844, |
| 5.045785 |          |            | 5.039904 |          |            | 5.034023 |          |            |
| 30553,   | 2424670, | 2019.0289, | 30591,   | 2484218, | 2016.6757, | 30629,   | 2547062, | 2014.3225, |
| 5.045630 |          |            | 5.039749 |          |            | 5.033868 |          |            |
| 30554,   | 2427006, | 2018.9670, | 30592,   | 2485684, | 2016.6138, | 30630,   | 2549896, | 2014.2606, |
| 5.045475 |          |            | 5.039594 |          |            | 5.033713 |          |            |
| 30555,   | 2430072, | 2018.9051, | 30593,   | 2488542, | 2016.5518, | 30631,   | 2553304, | 2014.1986, |
| 5.045320 |          |            | 5.039439 |          |            | 5.033559 |          |            |
| 30556,   | 2431996, | 2018.8431, | 30594,   | 2491030, | 2016.4899, | 30632,   | 2555686, | 2014.1367, |
| 5.045165 |          |            | 5.039285 |          |            | 5.033404 |          |            |
| 30557,   | 2432066, | 2018.7812, | 30595,   | 2492310, | 2016.4280, | 30633,   | 2556798, | 2014.0748, |
| 5.045011 |          |            | 5.039130 |          |            | 5.033249 |          |            |
| 30558,   | 2431710, | 2018.7193, | 30596,   | 2493324, | 2016.3661, | 30634,   | 2558014, | 2014.0128, |
| 5.044856 |          |            | 5.038975 |          |            | 5.033094 |          |            |
| 30559,   | 2432936, | 2018.6574, | 30597,   | 2495400, | 2016.3041, | 30635,   | 2560598, | 2013.9509, |
| 5.044701 |          |            | 5.038820 |          |            | 5.032940 |          |            |
| 30560,   | 2436088, | 2018.5954, | 30598,   | 2498420, | 2016.2422, | 30636,   | 2564012, | 2013.8890, |
| 5.044546 |          |            | 5.038666 |          |            | 5.032785 |          |            |



|          |          |            |          |          |            |          |          |            |
|----------|----------|------------|----------|----------|------------|----------|----------|------------|
| 30637,   | 2566480, | 2013.8271, | 30675,   | 2630820, | 2011.4738, | 30713,   | 2701838, | 2009.1206, |
| 5.032630 |          |            | 5.026749 |          |            | 5.020869 |          |            |
| 30638,   | 2567124, | 2013.7651, | 30676,   | 2631570, | 2011.4119, | 30714,   | 2702850, | 2009.0587, |
| 5.032475 |          |            | 5.026595 |          |            | 5.020714 |          |            |
| 30639,   | 2567178, | 2013.7032, | 30677,   | 2631762, | 2011.3500, | 30715,   | 2703170, | 2008.9968, |
| 5.032321 |          |            | 5.026440 |          |            | 5.020559 |          |            |
| 30640,   | 2568652, | 2013.6413, | 30678,   | 2633300, | 2011.2881, | 30716,   | 2704632, | 2008.9348, |
| 5.032166 |          |            | 5.026285 |          |            | 5.020404 |          |            |
| 30641,   | 2572008, | 2013.5794, | 30679,   | 2636628, | 2011.2261, | 30717,   | 2707530, | 2008.8729, |
| 5.032011 |          |            | 5.026130 |          |            | 5.020249 |          |            |
| 30642,   | 2575562, | 2013.5174, | 30680,   | 2640120, | 2011.1642, | 30718,   | 2710302, | 2008.8110, |
| 5.031856 |          |            | 5.025976 |          |            | 5.020095 |          |            |
| 30643,   | 2577382, | 2013.4555, | 30681,   | 2641984, | 2011.1023, | 30719,   | 2711452, | 2008.7491, |
| 5.031702 |          |            | 5.025821 |          |            | 5.019940 |          |            |
| 30644,   | 2577498, | 2013.3936, | 30682,   | 2642334, | 2011.0404, | 30720,   | 2711422, | 2008.6871, |
| 5.031547 |          |            | 5.025666 |          |            | 5.019785 |          |            |
| 30645,   | 2577820, | 2013.3316, | 30683,   | 2643062, | 2010.9784, | 30721,   | 2712134, | 2008.6252, |
| 5.031392 |          |            | 5.025511 |          |            | 5.019630 |          |            |
| 30646,   | 2579882, | 2013.2697, | 30684,   | 2645630, | 2010.9165, | 30722,   | 2714724, | 2008.5633, |
| 5.031237 |          |            | 5.025356 |          |            | 5.019476 |          |            |
| 30647,   | 2583072, | 2013.2078, | 30685,   | 2649358, | 2010.8546, | 30723,   | 2718188, | 2008.5014, |
| 5.031083 |          |            | 5.025202 |          |            | 5.019321 |          |            |
| 30648,   | 2585446, | 2013.1459, | 30686,   | 2652314, | 2010.7926, | 30724,   | 2720606, | 2008.4394, |
| 5.030928 |          |            | 5.025047 |          |            | 5.019166 |          |            |
| 30649,   | 2586156, | 2013.0839, | 30687,   | 2653568, | 2010.7307, | 30725,   | 2721442, | 2008.3775, |
| 5.030773 |          |            | 5.024892 |          |            | 5.019011 |          |            |
| 30650,   | 2586522, | 2013.0220, | 30688,   | 2654194, | 2010.6688, | 30726,   | 2722210, | 2008.3156, |
| 5.030618 |          |            | 5.024737 |          |            | 5.018857 |          |            |
| 30651,   | 2588476, | 2012.9601, | 30689,   | 2655866, | 2010.6069, | 30727,   | 2724674, | 2008.2536, |
| 5.030463 |          |            | 5.024583 |          |            | 5.018702 |          |            |
| 30652,   | 2592214, | 2012.8982, | 30690,   | 2658758, | 2010.5449, | 30728,   | 2728712, | 2008.1917, |
| 5.030309 |          |            | 5.024428 |          |            | 5.018547 |          |            |
| 30653,   | 2595832, | 2012.8362, | 30691,   | 2661354, | 2010.4830, | 30729,   | 2732404, | 2008.1298, |
| 5.030154 |          |            | 5.024273 |          |            | 5.018392 |          |            |
| 30654,   | 2597426, | 2012.7743, | 30692,   | 2662342, | 2010.4211, | 30730,   | 2734208, | 2008.0679, |
| 5.029999 |          |            | 5.024118 |          |            | 5.018238 |          |            |
| 30655,   | 2597228, | 2012.7124, | 30693,   | 2662258, | 2010.3592, | 30731,   | 2734678, | 2008.0059, |
| 5.029844 |          |            | 5.023964 |          |            | 5.018083 |          |            |
| 30656,   | 2597286, | 2012.6505, | 30694,   | 2662870, | 2010.2972, | 30732,   | 2735730, | 2007.9440, |
| 5.029690 |          |            | 5.023809 |          |            | 5.017928 |          |            |
| 30657,   | 2599096, | 2012.5885, | 30695,   | 2665038, | 2010.2353, | 30733,   | 2738356, | 2007.8821, |
| 5.029535 |          |            | 5.023654 |          |            | 5.017773 |          |            |
| 30658,   | 2602024, | 2012.5266, | 30696,   | 2667674, | 2010.1734, | 30734,   | 2741532, | 2007.8202, |
| 5.029380 |          |            | 5.023499 |          |            | 5.017619 |          |            |
| 30659,   | 2604262, | 2012.4647, | 30697,   | 2669080, | 2010.1115, | 30735,   | 2743504, | 2007.7582, |
| 5.029225 |          |            | 5.023345 |          |            | 5.017464 |          |            |
| 30660,   | 2605098, | 2012.4027, | 30698,   | 2669072, | 2010.0495, | 30736,   | 2743914, | 2007.6963, |
| 5.029071 |          |            | 5.023190 |          |            | 5.017309 |          |            |
| 30661,   | 2605740, | 2012.3408, | 30699,   | 2669310, | 2009.9876, | 30737,   | 2744178, | 2007.6344, |
| 5.028916 |          |            | 5.023035 |          |            | 5.017154 |          |            |
| 30662,   | 2607716, | 2012.2789, | 30700,   | 2671412, | 2009.9257, | 30738,   | 2745774, | 2007.5724, |
| 5.028761 |          |            | 5.022880 |          |            | 5.017000 |          |            |
| 30663,   | 2610918, | 2012.2170, | 30701,   | 2675062, | 2009.8637, | 30739,   | 2748566, | 2007.5105, |
| 5.028606 |          |            | 5.022726 |          |            | 5.016845 |          |            |
| 30664,   | 2613652, | 2012.1550, | 30702,   | 2678432, | 2009.8018, | 30740,   | 2751114, | 2007.4486, |
| 5.028452 |          |            | 5.022571 |          |            | 5.016690 |          |            |
| 30665,   | 2614702, | 2012.0931, | 30703,   | 2680342, | 2009.7399, | 30741,   | 2752528, | 2007.3867, |
| 5.028297 |          |            | 5.022416 |          |            | 5.016535 |          |            |
| 30666,   | 2614844, | 2012.0312, | 30704,   | 2681614, | 2009.6780, | 30742,   | 2753518, | 2007.3247, |
| 5.028142 |          |            | 5.022261 |          |            | 5.016381 |          |            |
| 30667,   | 2615980, | 2011.9693, | 30705,   | 2683936, | 2009.6160, | 30743,   | 2755376, | 2007.2628, |
| 5.027987 |          |            | 5.022107 |          |            | 5.016226 |          |            |
| 30668,   | 2618832, | 2011.9073, | 30706,   | 2687654, | 2009.5541, | 30744,   | 2758262, | 2007.2009, |
| 5.027833 |          |            | 5.021952 |          |            | 5.016071 |          |            |
| 30669,   | 2622044, | 2011.8454, | 30707,   | 2691180, | 2009.4922, | 30745,   | 2760912, | 2007.1390, |
| 5.027678 |          |            | 5.021797 |          |            | 5.015916 |          |            |
| 30670,   | 2623738, | 2011.7835, | 30708,   | 2692806, | 2009.4303, | 30746,   | 2762268, | 2007.0770, |
| 5.027523 |          |            | 5.021642 |          |            | 5.015762 |          |            |
| 30671,   | 2623730, | 2011.7216, | 30709,   | 2692774, | 2009.3683, | 30747,   | 2762864, | 2007.0151, |
| 5.027368 |          |            | 5.021488 |          |            | 5.015607 |          |            |
| 30672,   | 2623770, | 2011.6596, | 30710,   | 2693132, | 2009.3064, | 30748,   | 2764252, | 2006.9532, |
| 5.027214 |          |            | 5.021333 |          |            | 5.015452 |          |            |
| 30673,   | 2625470, | 2011.5977, | 30711,   | 2695438, | 2009.2445, | 30749,   | 2767096, | 2006.8913, |
| 5.027059 |          |            | 5.021178 |          |            | 5.015297 |          |            |
| 30674,   | 2628440, | 2011.5358, | 30712,   | 2699022, | 2009.1825, | 30750,   | 2770266, | 2006.8293, |
| 5.026904 |          |            | 5.021023 |          |            | 5.015142 |          |            |

|          |          |            |          |          |            |          |          |            |
|----------|----------|------------|----------|----------|------------|----------|----------|------------|
| 30751,   | 2772160, | 2006.7674, | 30789,   | 2849518, | 2004.4142, | 30827,   | 2927734, | 2002.0610, |
| 5.014988 |          |            | 5.009107 |          |            | 5.003226 |          |            |
| 30752,   | 2772742, | 2006.7055, | 30790,   | 2850564, | 2004.3522, | 30828,   | 2928084, | 2001.9990, |
| 5.014833 |          |            | 5.008952 |          |            | 5.003071 |          |            |
| 30753,   | 2773738, | 2006.6435, | 30791,   | 2851674, | 2004.2903, | 30829,   | 2928576, | 2001.9371, |
| 5.014678 |          |            | 5.008797 |          |            | 5.002917 |          |            |
| 30754,   | 2776654, | 2006.5816, | 30792,   | 2854166, | 2004.2284, | 30830,   | 2931046, | 2001.8752, |
| 5.014523 |          |            | 5.008643 |          |            | 5.002762 |          |            |
| 30755,   | 2780886, | 2006.5197, | 30793,   | 2857652, | 2004.1665, | 30831,   | 2935020, | 2001.8132, |
| 5.014369 |          |            | 5.008488 |          |            | 5.002607 |          |            |
| 30756,   | 2784272, | 2006.4578, | 30794,   | 2860460, | 2004.1045, | 30832,   | 2938430, | 2001.7513, |
| 5.014214 |          |            | 5.008333 |          |            | 5.002452 |          |            |
| 30757,   | 2785524, | 2006.3958, | 30795,   | 2861654, | 2004.0426, | 30833,   | 2940084, | 2001.6894, |
| 5.014059 |          |            | 5.008178 |          |            | 5.002298 |          |            |
| 30758,   | 2785732, | 2006.3339, | 30796,   | 2862248, | 2003.9807, | 30834,   | 2941048, | 2001.6275, |
| 5.013904 |          |            | 5.008024 |          |            | 5.002143 |          |            |
| 30759,   | 2787148, | 2006.2720, | 30797,   | 2864030, | 2003.9188, | 30835,   | 2943206, | 2001.5655, |
| 5.013750 |          |            | 5.007869 |          |            | 5.001988 |          |            |
| 30760,   | 2790578, | 2006.2101, | 30798,   | 2867452, | 2003.8568, | 30836,   | 2946914, | 2001.5036, |
| 5.013595 |          |            | 5.007714 |          |            | 5.001833 |          |            |
| 30761,   | 2794432, | 2006.1481, | 30799,   | 2871066, | 2003.7949, | 30837,   | 2950554, | 2001.4417, |
| 5.013440 |          |            | 5.007559 |          |            | 5.001679 |          |            |
| 30762,   | 2796540, | 2006.0862, | 30800,   | 2873246, | 2003.7330, | 30838,   | 2952496, | 2001.3798, |
| 5.013285 |          |            | 5.007405 |          |            | 5.001524 |          |            |
| 30763,   | 2796638, | 2006.0243, | 30801,   | 2874094, | 2003.6711, | 30839,   | 2953126, | 2001.3178, |
| 5.013131 |          |            | 5.007250 |          |            | 5.001369 |          |            |
| 30764,   | 2796610, | 2005.9623, | 30802,   | 2875242, | 2003.6091, | 30840,   | 2954390, | 2001.2559, |
| 5.012976 |          |            | 5.007095 |          |            | 5.001214 |          |            |
| 30765,   | 2798282, | 2005.9004, | 30803,   | 2877798, | 2003.5472, | 30841,   | 2957486, | 2001.1940, |
| 5.012821 |          |            | 5.006940 |          |            | 5.001060 |          |            |
| 30766,   | 2801324, | 2005.8385, | 30804,   | 2880970, | 2003.4853, | 30842,   | 2961438, | 2001.1320, |
| 5.012666 |          |            | 5.006786 |          |            | 5.000905 |          |            |
| 30767,   | 2803756, | 2005.7766, | 30805,   | 2883020, | 2003.4233, | 30843,   | 2964320, | 2001.0701, |
| 5.012512 |          |            | 5.006631 |          |            | 5.000750 |          |            |
| 30768,   | 2804388, | 2005.7146, | 30806,   | 2883454, | 2003.3614, | 30844,   | 2965634, | 2001.0082, |
| 5.012357 |          |            | 5.006476 |          |            | 5.000595 |          |            |
| 30769,   | 2804266, | 2005.6527, | 30807,   | 2883744, | 2003.2995, | 30845,   | 2966904, | 2000.9463, |
| 5.012202 |          |            | 5.006321 |          |            | 5.000441 |          |            |
| 30770,   | 2805478, | 2005.5908, | 30808,   | 2885654, | 2003.2376, | 30846,   | 2969786, | 2000.8843, |
| 5.012047 |          |            | 5.006167 |          |            | 5.000286 |          |            |
| 30771,   | 2808704, | 2005.5289, | 30809,   | 2889132, | 2003.1756, | 30847,   | 2973912, | 2000.8224, |
| 5.011893 |          |            | 5.006012 |          |            | 5.000131 |          |            |
| 30772,   | 2812500, | 2005.4669, | 30810,   | 2892338, | 2003.1137, | 30848,   | 2977142, | 2000.7605, |
| 5.011738 |          |            | 5.005857 |          |            | 4.999976 |          |            |
| 30773,   | 2815028, | 2005.4050, | 30811,   | 2893818, | 2003.0518, | 30849,   | 2978014, | 2000.6986, |
| 5.011583 |          |            | 5.005702 |          |            | 4.999821 |          |            |
| 30774,   | 2816204, | 2005.3431, | 30812,   | 2894206, | 2002.9899, | 30850,   | 2977460, | 2000.6366, |
| 5.011428 |          |            | 5.005548 |          |            | 4.999667 |          |            |
| 30775,   | 2817626, | 2005.2812, | 30813,   | 2895464, | 2002.9279, | 30851,   | 2977772, | 2000.5747, |
| 5.011274 |          |            | 5.005393 |          |            | 4.999512 |          |            |
| 30776,   | 2820510, | 2005.2192, | 30814,   | 2898526, | 2002.8660, | 30852,   | 2980016, | 2000.5128, |
| 5.011119 |          |            | 5.005238 |          |            | 4.999357 |          |            |
| 30777,   | 2824140, | 2005.1573, | 30815,   | 2902182, | 2002.8041, | 30853,   | 2982922, | 2000.4509, |
| 5.010964 |          |            | 5.005083 |          |            | 4.999202 |          |            |
| 30778,   | 2826726, | 2005.0954, | 30816,   | 2904556, | 2002.7421, | 30854,   | 2984608, | 2000.3889, |
| 5.010809 |          |            | 5.004928 |          |            | 4.999048 |          |            |
| 30779,   | 2827664, | 2005.0334, | 30817,   | 2905358, | 2002.6802, | 30855,   | 2984980, | 2000.3270, |
| 5.010655 |          |            | 5.004774 |          |            | 4.998893 |          |            |
| 30780,   | 2828358, | 2004.9715, | 30818,   | 2906250, | 2002.6183, | 30856,   | 2985914, | 2000.2651, |
| 5.010500 |          |            | 5.004619 |          |            | 4.998738 |          |            |
| 30781,   | 2830636, | 2004.9096, | 30819,   | 2908768, | 2002.5564, | 30857,   | 2988996, | 2000.2031, |
| 5.010345 |          |            | 5.004464 |          |            | 4.998583 |          |            |
| 30782,   | 2834574, | 2004.8477, | 30820,   | 2912394, | 2002.4944, | 30858,   | 2993500, | 2000.1412, |
| 5.010190 |          |            | 5.004309 |          |            | 4.998429 |          |            |
| 30783,   | 2838340, | 2004.7857, | 30821,   | 2915108, | 2002.4325, | 30859,   | 2997096, | 2000.0793, |
| 5.010035 |          |            | 5.004155 |          |            | 4.998274 |          |            |
| 30784,   | 2840284, | 2004.7238, | 30822,   | 2915846, | 2002.3706, | 30860,   | 2998486, | 2000.0174, |
| 5.009881 |          |            | 5.004000 |          |            | 4.998119 |          |            |
| 30785,   | 2840766, | 2004.6619, | 30823,   | 2915894, | 2002.3087, | 30861,   | 2998908, | 1999.9554, |
| 5.009726 |          |            | 5.003845 |          |            | 4.997964 |          |            |
| 30786,   | 2841642, | 2004.6000, | 30824,   | 2917510, | 2002.2467, | 30862,   | 3000688, | 1999.8935, |
| 5.009571 |          |            | 5.003690 |          |            | 4.997810 |          |            |
| 30787,   | 2844064, | 2004.5380, | 30825,   | 2921300, | 2002.1848, | 30863,   | 3004564, | 1999.8316, |
| 5.009416 |          |            | 5.003536 |          |            | 4.997655 |          |            |
| 30788,   | 2847230, | 2004.4761, | 30826,   | 2925440, | 2002.1229, | 30864,   | 3008906, | 1999.7697, |
| 5.009262 |          |            | 5.003381 |          |            | 4.997500 |          |            |

|          |          |            |          |          |            |          |          |            |
|----------|----------|------------|----------|----------|------------|----------|----------|------------|
| 30865,   | 3011674, | 1999.7077, | 30903,   | 3096988, | 1997.3545, | 30941,   | 3187106, | 1995.0013, |
| 4.997345 |          |            | 4.991465 |          |            | 4.985584 |          |            |
| 30866,   | 3012782, | 1999.6458, | 30904,   | 3097606, | 1997.2926, | 30942,   | 3187250, | 1994.9394, |
| 4.997191 |          |            | 4.991310 |          |            | 4.985429 |          |            |
| 30867,   | 3014058, | 1999.5839, | 30905,   | 3099086, | 1997.2307, | 30943,   | 3188714, | 1994.8774, |
| 4.997036 |          |            | 4.991155 |          |            | 4.985274 |          |            |
| 30868,   | 3016948, | 1999.5219, | 30906,   | 3102438, | 1997.1687, | 30944,   | 3192472, | 1994.8155, |
| 4.996881 |          |            | 4.991000 |          |            | 4.985119 |          |            |
| 30869,   | 3020808, | 1999.4600, | 30907,   | 3106372, | 1997.1068, | 30945,   | 3196888, | 1994.7536, |
| 4.996726 |          |            | 4.990846 |          |            | 4.984965 |          |            |
| 30870,   | 3023754, | 1999.3981, | 30908,   | 3108758, | 1997.0449, | 30946,   | 3199618, | 1994.6917, |
| 4.996572 |          |            | 4.990691 |          |            | 4.984810 |          |            |
| 30871,   | 3025036, | 1999.3362, | 30909,   | 3109172, | 1996.9829, | 30947,   | 3200398, | 1994.6297, |
| 4.996417 |          |            | 4.990536 |          |            | 4.984655 |          |            |
| 30872,   | 3025974, | 1999.2742, | 30910,   | 3109454, | 1996.9210, | 30948,   | 3201396, | 1994.5678, |
| 4.996262 |          |            | 4.990381 |          |            | 4.984500 |          |            |
| 30873,   | 3028288, | 1999.2123, | 30911,   | 3111602, | 1996.8591, | 30949,   | 3204684, | 1994.5059, |
| 4.996107 |          |            | 4.990226 |          |            | 4.984346 |          |            |
| 30874,   | 3031924, | 1999.1504, | 30912,   | 3115498, | 1996.7972, | 30950,   | 3209802, | 1994.4439, |
| 4.995953 |          |            | 4.990072 |          |            | 4.984191 |          |            |
| 30875,   | 3035062, | 1999.0885, | 30913,   | 3119152, | 1996.7352, | 30951,   | 3214284, | 1994.3820, |
| 4.995798 |          |            | 4.989917 |          |            | 4.984036 |          |            |
| 30876,   | 3036334, | 1999.0265, | 30914,   | 3121114, | 1996.6733, | 30952,   | 3216518, | 1994.3201, |
| 4.995643 |          |            | 4.989762 |          |            | 4.983881 |          |            |
| 30877,   | 3036626, | 1998.9646, | 30915,   | 3122178, | 1996.6114, | 30953,   | 3217600, | 1994.2582, |
| 4.995488 |          |            | 4.989607 |          |            | 4.983727 |          |            |
| 30878,   | 3038178, | 1998.9027, | 30916,   | 3124312, | 1996.5495, | 30954,   | 3219932, | 1994.1962, |
| 4.995333 |          |            | 4.989453 |          |            | 4.983572 |          |            |
| 30879,   | 3042000, | 1998.8408, | 30917,   | 3128158, | 1996.4875, | 30955,   | 3224332, | 1994.1343, |
| 4.995179 |          |            | 4.989298 |          |            | 4.983417 |          |            |
| 30880,   | 3046624, | 1998.7788, | 30918,   | 3132178, | 1996.4256, | 30956,   | 3229010, | 1994.0724, |
| 4.995024 |          |            | 4.989143 |          |            | 4.983262 |          |            |
| 30881,   | 3049756, | 1998.7169, | 30919,   | 3134502, | 1996.3637, | 30957,   | 3231628, | 1994.0105, |
| 4.994869 |          |            | 4.988988 |          |            | 4.983108 |          |            |
| 30882,   | 3050862, | 1998.6550, | 30920,   | 3135236, | 1996.3018, | 30958,   | 3231984, | 1993.9485, |
| 4.994714 |          |            | 4.988834 |          |            | 4.982953 |          |            |
| 30883,   | 3051706, | 1998.5930, | 30921,   | 3136452, | 1996.2398, | 30959,   | 3232204, | 1993.8866, |
| 4.994560 |          |            | 4.988679 |          |            | 4.982798 |          |            |
| 30884,   | 3054170, | 1998.5311, | 30922,   | 3139766, | 1996.1779, | 30960,   | 3234252, | 1993.8247, |
| 4.994405 |          |            | 4.988524 |          |            | 4.982643 |          |            |
| 30885,   | 3058016, | 1998.4692, | 30923,   | 3144396, | 1996.1160, | 30961,   | 3237774, | 1993.7627, |
| 4.994250 |          |            | 4.988369 |          |            | 4.982489 |          |            |
| 30886,   | 3061196, | 1998.4073, | 30924,   | 3148050, | 1996.0540, | 30962,   | 3240774, | 1993.7008, |
| 4.994095 |          |            | 4.988215 |          |            | 4.982334 |          |            |
| 30887,   | 3062352, | 1998.3453, | 30925,   | 3149594, | 1995.9921, | 30963,   | 3242182, | 1993.6389, |
| 4.993941 |          |            | 4.988060 |          |            | 4.982179 |          |            |
| 30888,   | 3062484, | 1998.2834, | 30926,   | 3150340, | 1995.9302, | 30964,   | 3243172, | 1993.5770, |
| 4.993786 |          |            | 4.987905 |          |            | 4.982024 |          |            |
| 30889,   | 3063822, | 1998.2215, | 30927,   | 3152444, | 1995.8683, | 30965,   | 3245676, | 1993.5150, |
| 4.993631 |          |            | 4.987750 |          |            | 4.981870 |          |            |
| 30890,   | 3067246, | 1998.1596, | 30928,   | 3156294, | 1995.8063, | 30966,   | 3249950, | 1993.4531, |
| 4.993476 |          |            | 4.987596 |          |            | 4.981715 |          |            |
| 30891,   | 3071304, | 1998.0976, | 30929,   | 3160090, | 1995.7444, | 30967,   | 3254200, | 1993.3912, |
| 4.993322 |          |            | 4.987441 |          |            | 4.981560 |          |            |
| 30892,   | 3073966, | 1998.0357, | 30930,   | 3162064, | 1995.6825, | 30968,   | 3256684, | 1993.3293, |
| 4.993167 |          |            | 4.987286 |          |            | 4.981405 |          |            |
| 30893,   | 3074956, | 1997.9738, | 30931,   | 3162648, | 1995.6206, | 30969,   | 3257790, | 1993.2673, |
| 4.993012 |          |            | 4.987131 |          |            | 4.981251 |          |            |
| 30894,   | 3075926, | 1997.9119, | 30932,   | 3164014, | 1995.5586, | 30970,   | 3259522, | 1993.2054, |
| 4.992857 |          |            | 4.986977 |          |            | 4.981096 |          |            |
| 30895,   | 3078322, | 1997.8499, | 30933,   | 3167464, | 1995.4967, | 30971,   | 3263044, | 1993.1435, |
| 4.992703 |          |            | 4.986822 |          |            | 4.980941 |          |            |
| 30896,   | 3081630, | 1997.7880, | 30934,   | 3171838, | 1995.4348, | 30972,   | 3267274, | 1993.0816, |
| 4.992548 |          |            | 4.986667 |          |            | 4.980786 |          |            |
| 30897,   | 3084086, | 1997.7261, | 30935,   | 3174876, | 1995.3728, | 30973,   | 3270188, | 1993.0196, |
| 4.992393 |          |            | 4.986512 |          |            | 4.980632 |          |            |
| 30898,   | 3084978, | 1997.6641, | 30936,   | 3175876, | 1995.3109, | 30974,   | 3271288, | 1992.9577, |
| 4.992238 |          |            | 4.986358 |          |            | 4.980477 |          |            |
| 30899,   | 3085618, | 1997.6022, | 30937,   | 3176520, | 1995.2490, | 30975,   | 3272224, | 1992.8958, |
| 4.992084 |          |            | 4.986203 |          |            | 4.980322 |          |            |
| 30900,   | 3087804, | 1997.5403, | 30938,   | 3178804, | 1995.1871, | 30976,   | 3274778, | 1992.8338, |
| 4.991929 |          |            | 4.986048 |          |            | 4.980167 |          |            |
| 30901,   | 3091602, | 1997.4784, | 30939,   | 3182622, | 1995.1251, | 30977,   | 3278758, | 1992.7719, |
| 4.991774 |          |            | 4.985893 |          |            | 4.980012 |          |            |
| 30902,   | 3095182, | 1997.4164, | 30940,   | 3185892, | 1995.0632, | 30978,   | 3282228, | 1992.7100, |
| 4.991619 |          |            | 4.985739 |          |            | 4.979858 |          |            |

|          |          |            |          |          |            |          |          |            |
|----------|----------|------------|----------|----------|------------|----------|----------|------------|
| 30979,   | 3283896, | 1992.6481, | 31017,   | 3380170, | 1990.2948, | 31055,   | 3488750, | 1987.9416, |
| 4.979703 |          |            | 4.973822 |          |            | 4.967941 |          |            |
| 30980,   | 3284700, | 1992.5861, | 31018,   | 3381334, | 1990.2329, | 31056,   | 3489622, | 1987.8797, |
| 4.979548 |          |            | 4.973667 |          |            | 4.967787 |          |            |
| 30981,   | 3286652, | 1992.5242, | 31019,   | 3383916, | 1990.1710, | 31057,   | 3492150, | 1987.8178, |
| 4.979393 |          |            | 4.973513 |          |            | 4.967632 |          |            |
| 30982,   | 3290360, | 1992.4623, | 31020,   | 3388442, | 1990.1091, | 31058,   | 3496788, | 1987.7558, |
| 4.979239 |          |            | 4.973358 |          |            | 4.967477 |          |            |
| 30983,   | 3294256, | 1992.4004, | 31021,   | 3393260, | 1990.0471, | 31059,   | 3501494, | 1987.6939, |
| 4.979084 |          |            | 4.973203 |          |            | 4.967322 |          |            |
| 30984,   | 3296496, | 1992.3384, | 31022,   | 3396596, | 1989.9852, | 31060,   | 3504184, | 1987.6320, |
| 4.978929 |          |            | 4.973048 |          |            | 4.967168 |          |            |
| 30985,   | 3297286, | 1992.2765, | 31023,   | 3398674, | 1989.9233, | 31061,   | 3505110, | 1987.5701, |
| 4.978774 |          |            | 4.972894 |          |            | 4.967013 |          |            |
| 30986,   | 3298756, | 1992.2146, | 31024,   | 3401362, | 1989.8614, | 31062,   | 3506434, | 1987.5081, |
| 4.978620 |          |            | 4.972739 |          |            | 4.966858 |          |            |
| 30987,   | 3302464, | 1992.1526, | 31025,   | 3405740, | 1989.7994, | 31063,   | 3509548, | 1987.4462, |
| 4.978465 |          |            | 4.972584 |          |            | 4.966703 |          |            |
| 30988,   | 3307488, | 1992.0907, | 31026,   | 3410564, | 1989.7375, | 31064,   | 3513468, | 1987.3843, |
| 4.978310 |          |            | 4.972429 |          |            | 4.966549 |          |            |
| 30989,   | 3311350, | 1992.0288, | 31027,   | 3413648, | 1989.6756, | 31065,   | 3516190, | 1987.3223, |
| 4.978155 |          |            | 4.972275 |          |            | 4.966394 |          |            |
| 30990,   | 3312790, | 1991.9669, | 31028,   | 3414494, | 1989.6136, | 31066,   | 3517298, | 1987.2604, |
| 4.978001 |          |            | 4.972120 |          |            | 4.966239 |          |            |
| 30991,   | 3313086, | 1991.9049, | 31029,   | 3415014, | 1989.5517, | 31067,   | 3518658, | 1987.1985, |
| 4.977846 |          |            | 4.971965 |          |            | 4.966084 |          |            |
| 30992,   | 3314478, | 1991.8430, | 31030,   | 3417368, | 1989.4898, | 31068,   | 3522202, | 1987.1366, |
| 4.977691 |          |            | 4.971810 |          |            | 4.965930 |          |            |
| 30993,   | 3317574, | 1991.7811, | 31031,   | 3421414, | 1989.4279, | 31069,   | 3527560, | 1987.0746, |
| 4.977536 |          |            | 4.971656 |          |            | 4.965775 |          |            |
| 30994,   | 3320882, | 1991.7192, | 31032,   | 3424890, | 1989.3659, | 31070,   | 3532362, | 1987.0127, |
| 4.977382 |          |            | 4.971501 |          |            | 4.965620 |          |            |
| 30995,   | 3322904, | 1991.6572, | 31033,   | 3426140, | 1989.3040, | 31071,   | 3534952, | 1986.9508, |
| 4.977227 |          |            | 4.971346 |          |            | 4.965465 |          |            |
| 30996,   | 3324164, | 1991.5953, | 31034,   | 3426188, | 1989.2421, | 31072,   | 3536276, | 1986.8889, |
| 4.977072 |          |            | 4.971191 |          |            | 4.965311 |          |            |
| 30997,   | 3326622, | 1991.5334, | 31035,   | 3427698, | 1989.1802, | 31073,   | 3538698, | 1986.8269, |
| 4.976917 |          |            | 4.971037 |          |            | 4.965156 |          |            |
| 30998,   | 3331178, | 1991.4715, | 31036,   | 3431920, | 1989.1182, | 31074,   | 3543126, | 1986.7650, |
| 4.976763 |          |            | 4.970882 |          |            | 4.965001 |          |            |
| 30999,   | 3336334, | 1991.4095, | 31037,   | 3437276, | 1989.0563, | 31075,   | 3547906, | 1986.7031, |
| 4.976608 |          |            | 4.970727 |          |            | 4.964846 |          |            |
| 31000,   | 3339778, | 1991.3476, | 31038,   | 3441198, | 1988.9944, | 31076,   | 3550770, | 1986.6412, |
| 4.976453 |          |            | 4.970572 |          |            | 4.964691 |          |            |
| 31001,   | 3341040, | 1991.2857, | 31039,   | 3443046, | 1988.9324, | 31077,   | 3551564, | 1986.5792, |
| 4.976298 |          |            | 4.970418 |          |            | 4.964537 |          |            |
| 31002,   | 3342096, | 1991.2237, | 31040,   | 3444734, | 1988.8705, | 31078,   | 3552464, | 1986.5173, |
| 4.976144 |          |            | 4.970263 |          |            | 4.964382 |          |            |
| 31003,   | 3345066, | 1991.1618, | 31041,   | 3448332, | 1988.8086, | 31079,   | 3555478, | 1986.4554, |
| 4.975989 |          |            | 4.970108 |          |            | 4.964227 |          |            |
| 31004,   | 3349714, | 1991.0999, | 31042,   | 3453566, | 1988.7467, | 31080,   | 3560182, | 1986.3934, |
| 4.975834 |          |            | 4.969953 |          |            | 4.964072 |          |            |
| 31005,   | 3353714, | 1991.0380, | 31043,   | 3458152, | 1988.6847, | 31081,   | 3564366, | 1986.3315, |
| 4.975679 |          |            | 4.969798 |          |            | 4.963918 |          |            |
| 31006,   | 3355376, | 1990.9760, | 31044,   | 3460508, | 1988.6228, | 31082,   | 3566690, | 1986.2696, |
| 4.975525 |          |            | 4.969644 |          |            | 4.963763 |          |            |
| 31007,   | 3355670, | 1990.9141, | 31045,   | 3461550, | 1988.5609, | 31083,   | 3568198, | 1986.2077, |
| 4.975370 |          |            | 4.969489 |          |            | 4.963608 |          |            |
| 31008,   | 3357080, | 1990.8522, | 31046,   | 3463462, | 1988.4990, | 31084,   | 3570876, | 1986.1457, |
| 4.975215 |          |            | 4.969334 |          |            | 4.963453 |          |            |
| 31009,   | 3360726, | 1990.7903, | 31047,   | 3466982, | 1988.4370, | 31085,   | 3575146, | 1986.0838, |
| 4.975060 |          |            | 4.969179 |          |            | 4.963299 |          |            |
| 31010,   | 3365064, | 1990.7283, | 31048,   | 3470546, | 1988.3751, | 31086,   | 3579380, | 1986.0219, |
| 4.974905 |          |            | 4.969025 |          |            | 4.963144 |          |            |
| 31011,   | 3367734, | 1990.6664, | 31049,   | 3472352, | 1988.3132, | 31087,   | 3581998, | 1985.9600, |
| 4.974751 |          |            | 4.968870 |          |            | 4.962989 |          |            |
| 31012,   | 3368302, | 1990.6045, | 31050,   | 3472738, | 1988.2513, | 31088,   | 3583536, | 1985.8980, |
| 4.974596 |          |            | 4.968715 |          |            | 4.962834 |          |            |
| 31013,   | 3368734, | 1990.5425, | 31051,   | 3474028, | 1988.1893, | 31089,   | 3586040, | 1985.8361, |
| 4.974441 |          |            | 4.968560 |          |            | 4.962680 |          |            |
| 31014,   | 3371022, | 1990.4806, | 31052,   | 3477824, | 1988.1274, | 31090,   | 3590512, | 1985.7742, |
| 4.974286 |          |            | 4.968406 |          |            | 4.962525 |          |            |
| 31015,   | 3374916, | 1990.4187, | 31053,   | 3483054, | 1988.0655, | 31091,   | 3595536, | 1985.7123, |
| 4.974132 |          |            | 4.968251 |          |            | 4.962370 |          |            |
| 31016,   | 3378384, | 1990.3568, | 31054,   | 3487084, | 1988.0035, | 31092,   | 3598860, | 1985.6503, |
| 4.973977 |          |            | 4.968096 |          |            | 4.962215 |          |            |

|          |          |            |          |          |            |          |          |            |
|----------|----------|------------|----------|----------|------------|----------|----------|------------|
| 31093,   | 3600136, | 1985.5884, | 31131,   | 3713978, | 1983.2352, | 31169,   | 3835924, | 1980.8820, |
| 4.962061 |          |            | 4.956180 |          |            | 4.950299 |          |            |
| 31094,   | 3601458, | 1985.5265, | 31132,   | 3715412, | 1983.1732, | 31170,   | 3838114, | 1980.8200, |
| 4.961906 |          |            | 4.956025 |          |            | 4.950144 |          |            |
| 31095,   | 3604928, | 1985.4645, | 31133,   | 3718506, | 1983.1113, | 31171,   | 3842380, | 1980.7581, |
| 4.961751 |          |            | 4.955870 |          |            | 4.949989 |          |            |
| 31096,   | 3610092, | 1985.4026, | 31134,   | 3723164, | 1983.0494, | 31172,   | 3847888, | 1980.6962, |
| 4.961596 |          |            | 4.955716 |          |            | 4.949835 |          |            |
| 31097,   | 3614350, | 1985.3407, | 31135,   | 3727320, | 1982.9875, | 31173,   | 3852094, | 1980.6342, |
| 4.961442 |          |            | 4.955561 |          |            | 4.949680 |          |            |
| 31098,   | 3615934, | 1985.2788, | 31136,   | 3729508, | 1982.9255, | 31174,   | 3853760, | 1980.5723, |
| 4.961287 |          |            | 4.955406 |          |            | 4.949525 |          |            |
| 31099,   | 3616004, | 1985.2168, | 31137,   | 3730714, | 1982.8636, | 31175,   | 3854492, | 1980.5104, |
| 4.961132 |          |            | 4.955251 |          |            | 4.949370 |          |            |
| 31100,   | 3617370, | 1985.1549, | 31138,   | 3733170, | 1982.8017, | 31176,   | 3856958, | 1980.4485, |
| 4.960977 |          |            | 4.955097 |          |            | 4.949216 |          |            |
| 31101,   | 3621278, | 1985.0930, | 31139,   | 3737602, | 1982.7398, | 31177,   | 3861822, | 1980.3865, |
| 4.960823 |          |            | 4.954942 |          |            | 4.949061 |          |            |
| 31102,   | 3626080, | 1985.0311, | 31140,   | 3742326, | 1982.6778, | 31178,   | 3867086, | 1980.3246, |
| 4.960668 |          |            | 4.954787 |          |            | 4.948906 |          |            |
| 31103,   | 3629268, | 1984.9691, | 31141,   | 3745310, | 1982.6159, | 31179,   | 3870550, | 1980.2627, |
| 4.960513 |          |            | 4.954632 |          |            | 4.948751 |          |            |
| 31104,   | 3630502, | 1984.9072, | 31142,   | 3746732, | 1982.5540, | 31180,   | 3872482, | 1980.2008, |
| 4.960358 |          |            | 4.954477 |          |            | 4.948597 |          |            |
| 31105,   | 3632000, | 1984.8453, | 31143,   | 3748850, | 1982.4921, | 31181,   | 3875252, | 1980.1388, |
| 4.960204 |          |            | 4.954323 |          |            | 4.948442 |          |            |
| 31106,   | 3635850, | 1984.7833, | 31144,   | 3753290, | 1982.4301, | 31182,   | 3880440, | 1980.0769, |
| 4.960049 |          |            | 4.954168 |          |            | 4.948287 |          |            |
| 31107,   | 3641472, | 1984.7214, | 31145,   | 3758994, | 1982.3682, | 31183,   | 3886782, | 1980.0150, |
| 4.959894 |          |            | 4.954013 |          |            | 4.948132 |          |            |
| 31108,   | 3646228, | 1984.6595, | 31146,   | 3763328, | 1982.3063, | 31184,   | 3891572, | 1979.9530, |
| 4.959739 |          |            | 4.953858 |          |            | 4.947978 |          |            |
| 31109,   | 3648444, | 1984.5976, | 31147,   | 3765142, | 1982.2443, | 31185,   | 3893760, | 1979.8911, |
| 4.959584 |          |            | 4.953704 |          |            | 4.947823 |          |            |
| 31110,   | 3649284, | 1984.5356, | 31148,   | 3766132, | 1982.1824, | 31186,   | 3895112, | 1979.8292, |
| 4.959430 |          |            | 4.953549 |          |            | 4.947668 |          |            |
| 31111,   | 3651262, | 1984.4737, | 31149,   | 3768872, | 1982.1205, | 31187,   | 3898100, | 1979.7673, |
| 4.959275 |          |            | 4.953394 |          |            | 4.947513 |          |            |
| 31112,   | 3655246, | 1984.4118, | 31150,   | 3773822, | 1982.0586, | 31188,   | 3902990, | 1979.7053, |
| 4.959120 |          |            | 4.953239 |          |            | 4.947359 |          |            |
| 31113,   | 3659544, | 1984.3499, | 31151,   | 3778834, | 1981.9966, | 31189,   | 3907650, | 1979.6434, |
| 4.958965 |          |            | 4.953085 |          |            | 4.947204 |          |            |
| 31114,   | 3662134, | 1984.2879, | 31152,   | 3781770, | 1981.9347, | 31190,   | 3910250, | 1979.5815, |
| 4.958811 |          |            | 4.952930 |          |            | 4.947049 |          |            |
| 31115,   | 3663244, | 1984.2260, | 31153,   | 3783054, | 1981.8728, | 31191,   | 3911558, | 1979.5196, |
| 4.958656 |          |            | 4.952775 |          |            | 4.946894 |          |            |
| 31116,   | 3665168, | 1984.1641, | 31154,   | 3785168, | 1981.8109, | 31192,   | 3914064, | 1979.4576, |
| 4.958501 |          |            | 4.952620 |          |            | 4.946740 |          |            |
| 31117,   | 3669462, | 1984.1022, | 31155,   | 3789686, | 1981.7489, | 31193,   | 3918972, | 1979.3957, |
| 4.958346 |          |            | 4.952466 |          |            | 4.946585 |          |            |
| 31118,   | 3674962, | 1984.0402, | 31156,   | 3795392, | 1981.6870, | 31194,   | 3924696, | 1979.3338, |
| 4.958192 |          |            | 4.952311 |          |            | 4.946430 |          |            |
| 31119,   | 3679004, | 1983.9783, | 31157,   | 3799692, | 1981.6251, | 31195,   | 3928662, | 1979.2719, |
| 4.958037 |          |            | 4.952156 |          |            | 4.946275 |          |            |
| 31120,   | 3680508, | 1983.9164, | 31158,   | 3801646, | 1981.5631, | 31196,   | 3930334, | 1979.2099, |
| 4.957882 |          |            | 4.952001 |          |            | 4.946121 |          |            |
| 31121,   | 3681218, | 1983.8544, | 31159,   | 3802958, | 1981.5012, | 31197,   | 3931808, | 1979.1480, |
| 4.957727 |          |            | 4.951847 |          |            | 4.945966 |          |            |
| 31122,   | 3683656, | 1983.7925, | 31160,   | 3805844, | 1981.4393, | 31198,   | 3935344, | 1979.0861, |
| 4.957573 |          |            | 4.951692 |          |            | 4.945811 |          |            |
| 31123,   | 3688178, | 1983.7306, | 31161,   | 3810392, | 1981.3774, | 31199,   | 3940716, | 1979.0241, |
| 4.957418 |          |            | 4.951537 |          |            | 4.945656 |          |            |
| 31124,   | 3692642, | 1983.6687, | 31162,   | 3814538, | 1981.3154, | 31200,   | 3945588, | 1978.9622, |
| 4.957263 |          |            | 4.951382 |          |            | 4.945502 |          |            |
| 31125,   | 3695054, | 1983.6067, | 31163,   | 3816718, | 1981.2535, | 31201,   | 3948334, | 1978.9003, |
| 4.957108 |          |            | 4.951228 |          |            | 4.945347 |          |            |
| 31126,   | 3696004, | 1983.5448, | 31164,   | 3817860, | 1981.1916, | 31202,   | 3949960, | 1978.8384, |
| 4.956954 |          |            | 4.951073 |          |            | 4.945192 |          |            |
| 31127,   | 3697974, | 1983.4829, | 31165,   | 3820320, | 1981.1297, | 31203,   | 3952808, | 1978.7764, |
| 4.956799 |          |            | 4.950918 |          |            | 4.945037 |          |            |
| 31128,   | 3702404, | 1983.4210, | 31166,   | 3825028, | 1981.0677, | 31204,   | 3957732, | 1978.7145, |
| 4.956644 |          |            | 4.950763 |          |            | 4.944882 |          |            |
| 31129,   | 3707952, | 1983.3590, | 31167,   | 3830356, | 1981.0058, | 31205,   | 3963088, | 1978.6526, |
| 4.956489 |          |            | 4.950609 |          |            | 4.944728 |          |            |
| 31130,   | 3712080, | 1983.2971, | 31168,   | 3834038, | 1980.9439, | 31206,   | 3966794, | 1978.5907, |
| 4.956335 |          |            | 4.950454 |          |            | 4.944573 |          |            |

|          |          |            |          |          |            |          |          |            |
|----------|----------|------------|----------|----------|------------|----------|----------|------------|
| 31207,   | 3968856, | 1978.5287, | 31245,   | 4102308, | 1976.1755, | 31283,   | 4240680, | 1973.8223, |
| 4.944418 |          |            | 4.938537 |          |            | 4.932657 |          |            |
| 31208,   | 3971300, | 1978.4668, | 31246,   | 4103984, | 1976.1136, | 31284,   | 4243676, | 1973.7604, |
| 4.944263 |          |            | 4.938383 |          |            | 4.932502 |          |            |
| 31209,   | 3975592, | 1978.4049, | 31247,   | 4108264, | 1976.0517, | 31285,   | 4249288, | 1973.6984, |
| 4.944109 |          |            | 4.938228 |          |            | 4.932347 |          |            |
| 31210,   | 3980758, | 1978.3429, | 31248,   | 4113902, | 1975.9897, | 31286,   | 4255650, | 1973.6365, |
| 4.943954 |          |            | 4.938073 |          |            | 4.932192 |          |            |
| 31211,   | 3984532, | 1978.2810, | 31249,   | 4118244, | 1975.9278, | 31287,   | 4259938, | 1973.5746, |
| 4.943799 |          |            | 4.937918 |          |            | 4.932038 |          |            |
| 31212,   | 3986144, | 1978.2191, | 31250,   | 4120428, | 1975.8659, | 31288,   | 4261676, | 1973.5126, |
| 4.943644 |          |            | 4.937764 |          |            | 4.931883 |          |            |
| 31213,   | 3987390, | 1978.1572, | 31251,   | 4122396, | 1975.8039, | 31289,   | 4263360, | 1973.4507, |
| 4.943490 |          |            | 4.937609 |          |            | 4.931728 |          |            |
| 31214,   | 3990536, | 1978.0952, | 31252,   | 4126488, | 1975.7420, | 31290,   | 4267610, | 1973.3888, |
| 4.943335 |          |            | 4.937454 |          |            | 4.931573 |          |            |
| 31215,   | 3995620, | 1978.0333, | 31253,   | 4132544, | 1975.6801, | 31291,   | 4274180, | 1973.3269, |
| 4.943180 |          |            | 4.937299 |          |            | 4.931419 |          |            |
| 31216,   | 4000352, | 1977.9714, | 31254,   | 4138016, | 1975.6182, | 31292,   | 4280294, | 1973.2649, |
| 4.943025 |          |            | 4.937145 |          |            | 4.931264 |          |            |
| 31217,   | 4002858, | 1977.9095, | 31255,   | 4140980, | 1975.5562, | 31293,   | 4283886, | 1973.2030, |
| 4.942871 |          |            | 4.936990 |          |            | 4.931109 |          |            |
| 31218,   | 4003968, | 1977.8475, | 31256,   | 4142422, | 1975.4943, | 31294,   | 4285896, | 1973.1411, |
| 4.942716 |          |            | 4.936835 |          |            | 4.930954 |          |            |
| 31219,   | 4006300, | 1977.7856, | 31257,   | 4145062, | 1975.4324, | 31295,   | 4288948, | 1973.0792, |
| 4.942561 |          |            | 4.936680 |          |            | 4.930800 |          |            |
| 31220,   | 4011196, | 1977.7237, | 31258,   | 4150122, | 1975.3705, | 31296,   | 4294148, | 1973.0172, |
| 4.942406 |          |            | 4.936526 |          |            | 4.930645 |          |            |
| 31221,   | 4017138, | 1977.6618, | 31259,   | 4155894, | 1975.3085, | 31297,   | 4299808, | 1972.9553, |
| 4.942252 |          |            | 4.936371 |          |            | 4.930490 |          |            |
| 31222,   | 4021544, | 1977.5998, | 31260,   | 4159808, | 1975.2466, | 31298,   | 4303624, | 1972.8934, |
| 4.942097 |          |            | 4.936216 |          |            | 4.930335 |          |            |
| 31223,   | 4023788, | 1977.5379, | 31261,   | 4161504, | 1975.1847, | 31299,   | 4305542, | 1972.8315, |
| 4.941942 |          |            | 4.936061 |          |            | 4.930181 |          |            |
| 31224,   | 4025844, | 1977.4760, | 31262,   | 4163250, | 1975.1227, | 31300,   | 4307874, | 1972.7695, |
| 4.941787 |          |            | 4.935907 |          |            | 4.930026 |          |            |
| 31225,   | 4029816, | 1977.4140, | 31263,   | 4167176, | 1975.0608, | 31301,   | 4312484, | 1972.7076, |
| 4.941633 |          |            | 4.935752 |          |            | 4.929871 |          |            |
| 31226,   | 4035320, | 1977.3521, | 31264,   | 4172738, | 1974.9989, | 31302,   | 4318504, | 1972.6457, |
| 4.941478 |          |            | 4.935597 |          |            | 4.929716 |          |            |
| 31227,   | 4039926, | 1977.2902, | 31265,   | 4177424, | 1974.9370, | 31303,   | 4323416, | 1972.5837, |
| 4.941323 |          |            | 4.935442 |          |            | 4.929561 |          |            |
| 31228,   | 4042148, | 1977.2283, | 31266,   | 4179870, | 1974.8750, | 31304,   | 4326150, | 1972.5218, |
| 4.941168 |          |            | 4.935288 |          |            | 4.929407 |          |            |
| 31229,   | 4043316, | 1977.1663, | 31267,   | 4181574, | 1974.8131, | 31305,   | 4328458, | 1972.4599, |
| 4.941014 |          |            | 4.935133 |          |            | 4.929252 |          |            |
| 31230,   | 4046136, | 1977.1044, | 31268,   | 4185116, | 1974.7512, | 31306,   | 4332848, | 1972.3980, |
| 4.940859 |          |            | 4.934978 |          |            | 4.929097 |          |            |
| 31231,   | 4051516, | 1977.0425, | 31269,   | 4190954, | 1974.6893, | 31307,   | 4339512, | 1972.3360, |
| 4.940704 |          |            | 4.934823 |          |            | 4.928942 |          |            |
| 31232,   | 4057522, | 1976.9806, | 31270,   | 4196738, | 1974.6273, | 31308,   | 4345962, | 1972.2741, |
| 4.940549 |          |            | 4.934668 |          |            | 4.928788 |          |            |
| 31233,   | 4061688, | 1976.9186, | 31271,   | 4199964, | 1974.5654, | 31309,   | 4349878, | 1972.2122, |
| 4.940395 |          |            | 4.934514 |          |            | 4.928633 |          |            |
| 31234,   | 4063908, | 1976.8567, | 31272,   | 4200930, | 1974.5035, | 31310,   | 4351796, | 1972.1503, |
| 4.940240 |          |            | 4.934359 |          |            | 4.928478 |          |            |
| 31235,   | 4066476, | 1976.7948, | 31273,   | 4202430, | 1974.4416, | 31311,   | 4354450, | 1972.0883, |
| 4.940085 |          |            | 4.934204 |          |            | 4.928323 |          |            |
| 31236,   | 4071212, | 1976.7328, | 31274,   | 4206572, | 1974.3796, | 31312,   | 4359542, | 1972.0264, |
| 4.939930 |          |            | 4.934049 |          |            | 4.928169 |          |            |
| 31237,   | 4077210, | 1976.6709, | 31275,   | 4212444, | 1974.3177, | 31313,   | 4365756, | 1971.9645, |
| 4.939775 |          |            | 4.933895 |          |            | 4.928014 |          |            |
| 31238,   | 4081850, | 1976.6090, | 31276,   | 4217330, | 1974.2558, | 31314,   | 4370360, | 1971.9026, |
| 4.939621 |          |            | 4.933740 |          |            | 4.927859 |          |            |
| 31239,   | 4083976, | 1976.5471, | 31277,   | 4219988, | 1974.1938, | 31315,   | 4372430, | 1971.8406, |
| 4.939466 |          |            | 4.933585 |          |            | 4.927704 |          |            |
| 31240,   | 4085316, | 1976.4851, | 31278,   | 4221994, | 1974.1319, | 31316,   | 4373854, | 1971.7787, |
| 4.939311 |          |            | 4.933430 |          |            | 4.927550 |          |            |
| 31241,   | 4088452, | 1976.4232, | 31279,   | 4225676, | 1974.0700, | 31317,   | 4376980, | 1971.7168, |
| 4.939156 |          |            | 4.933276 |          |            | 4.927395 |          |            |
| 31242,   | 4093726, | 1976.3613, | 31280,   | 4231172, | 1974.0081, | 31318,   | 4381850, | 1971.6548, |
| 4.939002 |          |            | 4.933121 |          |            | 4.927240 |          |            |
| 31243,   | 4098822, | 1976.2994, | 31281,   | 4236250, | 1973.9461, | 31319,   | 4386308, | 1971.5929, |
| 4.938847 |          |            | 4.932966 |          |            | 4.927085 |          |            |
| 31244,   | 4101500, | 1976.2374, | 31282,   | 4239100, | 1973.8842, | 31320,   | 4388836, | 1971.5310, |
| 4.938692 |          |            | 4.932811 |          |            | 4.926931 |          |            |

|          |          |            |          |          |            |          |          |            |
|----------|----------|------------|----------|----------|------------|----------|----------|------------|
| 31321,   | 4390592, | 1971.4691, | 31359,   | 4554106, | 1969.1158, | 31397,   | 4719974, | 1966.7626, |
| 4.926776 |          |            | 4.920895 |          |            | 4.915014 |          |            |
| 31322,   | 4394090, | 1971.4071, | 31360,   | 4557158, | 1969.0539, | 31398,   | 4724342, | 1966.7007, |
| 4.926621 |          |            | 4.920740 |          |            | 4.914860 |          |            |
| 31323,   | 4400110, | 1971.3452, | 31361,   | 4562508, | 1968.9920, | 31399,   | 4731358, | 1966.6388, |
| 4.926466 |          |            | 4.920586 |          |            | 4.914705 |          |            |
| 31324,   | 4406590, | 1971.2833, | 31362,   | 4568222, | 1968.9301, | 31400,   | 4738410, | 1966.5768, |
| 4.926312 |          |            | 4.920431 |          |            | 4.914550 |          |            |
| 31325,   | 4410972, | 1971.2214, | 31363,   | 4572028, | 1968.8681, | 31401,   | 4742906, | 1966.5149, |
| 4.926157 |          |            | 4.920276 |          |            | 4.914395 |          |            |
| 31326,   | 4413164, | 1971.1594, | 31364,   | 4574242, | 1968.8062, | 31402,   | 4745296, | 1966.4530, |
| 4.926002 |          |            | 4.920121 |          |            | 4.914240 |          |            |
| 31327,   | 4415626, | 1971.0975, | 31365,   | 4577414, | 1968.7443, | 31403,   | 4748430, | 1966.3911, |
| 4.925847 |          |            | 4.919967 |          |            | 4.914086 |          |            |
| 31328,   | 4420432, | 1971.0356, | 31366,   | 4583174, | 1968.6824, | 31404,   | 4754088, | 1966.3291, |
| 4.925693 |          |            | 4.919812 |          |            | 4.913931 |          |            |
| 31329,   | 4426778, | 1970.9736, | 31367,   | 4590064, | 1968.6204, | 31405,   | 4760882, | 1966.2672, |
| 4.925538 |          |            | 4.919657 |          |            | 4.913776 |          |            |
| 31330,   | 4431996, | 1970.9117, | 31368,   | 4595118, | 1968.5585, | 31406,   | 4766020, | 1966.2053, |
| 4.925383 |          |            | 4.919502 |          |            | 4.913621 |          |            |
| 31331,   | 4434798, | 1970.8498, | 31369,   | 4597338, | 1968.4966, | 31407,   | 4768800, | 1966.1433, |
| 4.925228 |          |            | 4.919347 |          |            | 4.913467 |          |            |
| 31332,   | 4436898, | 1970.7879, | 31370,   | 4598960, | 1968.4346, | 31408,   | 4771542, | 1966.0814, |
| 4.925074 |          |            | 4.919193 |          |            | 4.913312 |          |            |
| 31333,   | 4440978, | 1970.7259, | 31371,   | 4602896, | 1968.3727, | 31409,   | 4776792, | 1966.0195, |
| 4.924919 |          |            | 4.919038 |          |            | 4.913157 |          |            |
| 31334,   | 4447470, | 1970.6640, | 31372,   | 4609354, | 1968.3108, | 31410,   | 4784158, | 1965.9576, |
| 4.924764 |          |            | 4.918883 |          |            | 4.913002 |          |            |
| 31335,   | 4453966, | 1970.6021, | 31373,   | 4615620, | 1968.2489, | 31411,   | 4790596, | 1965.8956, |
| 4.924609 |          |            | 4.918728 |          |            | 4.912848 |          |            |
| 31336,   | 4458032, | 1970.5402, | 31374,   | 4619262, | 1968.1869, | 31412,   | 4793920, | 1965.8337, |
| 4.924454 |          |            | 4.918574 |          |            | 4.912693 |          |            |
| 31337,   | 4460074, | 1970.4782, | 31375,   | 4620954, | 1968.1250, | 31413,   | 4795408, | 1965.7718, |
| 4.924300 |          |            | 4.918419 |          |            | 4.912538 |          |            |
| 31338,   | 4462846, | 1970.4163, | 31376,   | 4623658, | 1968.0631, | 31414,   | 4798368, | 1965.7099, |
| 4.924145 |          |            | 4.918264 |          |            | 4.912383 |          |            |
| 31339,   | 4468170, | 1970.3544, | 31377,   | 4629128, | 1968.0012, | 31415,   | 4804380, | 1965.6479, |
| 4.923990 |          |            | 4.918109 |          |            | 4.912229 |          |            |
| 31340,   | 4474844, | 1970.2925, | 31378,   | 4635934, | 1967.9392, | 31416,   | 4811606, | 1965.5860, |
| 4.923835 |          |            | 4.917955 |          |            | 4.912074 |          |            |
| 31341,   | 4480124, | 1970.2305, | 31379,   | 4641300, | 1967.8773, | 31417,   | 4817100, | 1965.5241, |
| 4.923681 |          |            | 4.917800 |          |            | 4.911919 |          |            |
| 31342,   | 4483066, | 1970.1686, | 31380,   | 4644434, | 1967.8154, | 31418,   | 4820326, | 1965.4622, |
| 4.923526 |          |            | 4.917645 |          |            | 4.911764 |          |            |
| 31343,   | 4485628, | 1970.1067, | 31381,   | 4647358, | 1967.7534, | 31419,   | 4823666, | 1965.4002, |
| 4.923371 |          |            | 4.917490 |          |            | 4.911610 |          |            |
| 31344,   | 4490280, | 1970.0447, | 31382,   | 4652292, | 1967.6915, | 31420,   | 4829406, | 1965.3383, |
| 4.923216 |          |            | 4.917336 |          |            | 4.911455 |          |            |
| 31345,   | 4496980, | 1969.9828, | 31383,   | 4658858, | 1967.6296, | 31421,   | 4836892, | 1965.2764, |
| 4.923062 |          |            | 4.917181 |          |            | 4.911300 |          |            |
| 31346,   | 4503140, | 1969.9209, | 31384,   | 4664528, | 1967.5677, | 31422,   | 4843270, | 1965.2144, |
| 4.922907 |          |            | 4.917026 |          |            | 4.911145 |          |            |
| 31347,   | 4506684, | 1969.8590, | 31385,   | 4667794, | 1967.5057, | 31423,   | 4846932, | 1965.1525, |
| 4.922752 |          |            | 4.916871 |          |            | 4.910991 |          |            |
| 31348,   | 4508444, | 1969.7970, | 31386,   | 4670124, | 1967.4438, | 31424,   | 4849454, | 1965.0906, |
| 4.922597 |          |            | 4.916717 |          |            | 4.910836 |          |            |
| 31349,   | 4511092, | 1969.7351, | 31387,   | 4674298, | 1967.3819, | 31425,   | 4853724, | 1965.0287, |
| 4.922443 |          |            | 4.916562 |          |            | 4.910681 |          |            |
| 31350,   | 4515914, | 1969.6732, | 31388,   | 4681012, | 1967.3200, | 31426,   | 4860476, | 1964.9667, |
| 4.922288 |          |            | 4.916407 |          |            | 4.910526 |          |            |
| 31351,   | 4521358, | 1969.6113, | 31389,   | 4687934, | 1967.2580, | 31427,   | 4867440, | 1964.9048, |
| 4.922133 |          |            | 4.916252 |          |            | 4.910372 |          |            |
| 31352,   | 4525114, | 1969.5493, | 31390,   | 4692378, | 1967.1961, | 31428,   | 4872124, | 1964.8429, |
| 4.921978 |          |            | 4.916098 |          |            | 4.910217 |          |            |
| 31353,   | 4527124, | 1969.4874, | 31391,   | 4694494, | 1967.1342, | 31429,   | 4874828, | 1964.7810, |
| 4.921824 |          |            | 4.915943 |          |            | 4.910062 |          |            |
| 31354,   | 4529878, | 1969.4255, | 31392,   | 4697116, | 1967.0723, | 31430,   | 4878284, | 1964.7190, |
| 4.921669 |          |            | 4.915788 |          |            | 4.909907 |          |            |
| 31355,   | 4535458, | 1969.3635, | 31393,   | 4702420, | 1967.0103, | 31431,   | 4884312, | 1964.6571, |
| 4.921514 |          |            | 4.915633 |          |            | 4.909753 |          |            |
| 31356,   | 4542918, | 1969.3016, | 31394,   | 4709362, | 1966.9484, | 31432,   | 4891576, | 1964.5952, |
| 4.921359 |          |            | 4.915479 |          |            | 4.909598 |          |            |
| 31357,   | 4549164, | 1969.2397, | 31395,   | 4714946, | 1966.8865, | 31433,   | 4897160, | 1964.5332, |
| 4.921205 |          |            | 4.915324 |          |            | 4.909443 |          |            |
| 31358,   | 4552408, | 1969.1778, | 31396,   | 4717824, | 1966.8245, | 31434,   | 4900052, | 1964.4713, |
| 4.921050 |          |            | 4.915169 |          |            | 4.909288 |          |            |

|          |          |            |          |          |            |          |          |            |
|----------|----------|------------|----------|----------|------------|----------|----------|------------|
| 31435,   | 4902390, | 1964.4094, | 31473,   | 5093382, | 1962.0562, | 31511,   | 5291340, | 1959.7029, |
| 4.909133 |          |            | 4.903253 |          |            | 4.897372 |          |            |
| 31436,   | 4906884, | 1964.3475, | 31474,   | 5098918, | 1961.9942, | 31512,   | 5297570, | 1959.6410, |
| 4.908979 |          |            | 4.903098 |          |            | 4.897217 |          |            |
| 31437,   | 4913564, | 1964.2855, | 31475,   | 5106258, | 1961.9323, | 31513,   | 5305642, | 1959.5791, |
| 4.908824 |          |            | 4.902943 |          |            | 4.897062 |          |            |
| 31438,   | 4919800, | 1964.2236, | 31476,   | 5112644, | 1961.8704, | 31514,   | 5312356, | 1959.5172, |
| 4.908669 |          |            | 4.902788 |          |            | 4.896908 |          |            |
| 31439,   | 4923538, | 1964.1617, | 31477,   | 5116324, | 1961.8085, | 31515,   | 5316074, | 1959.4552, |
| 4.908514 |          |            | 4.902634 |          |            | 4.896753 |          |            |
| 31440,   | 4925902, | 1964.0998, | 31478,   | 5118792, | 1961.7465, | 31516,   | 5318802, | 1959.3933, |
| 4.908360 |          |            | 4.902479 |          |            | 4.896598 |          |            |
| 31441,   | 4929912, | 1964.0378, | 31479,   | 5123090, | 1961.6846, | 31517,   | 5323896, | 1959.3314, |
| 4.908205 |          |            | 4.902324 |          |            | 4.896443 |          |            |
| 31442,   | 4936828, | 1963.9759, | 31480,   | 5130174, | 1961.6227, | 31518,   | 5332050, | 1959.2695, |
| 4.908050 |          |            | 4.902169 |          |            | 4.896289 |          |            |
| 31443,   | 4944518, | 1963.9140, | 31481,   | 5137706, | 1961.5608, | 31519,   | 5340344, | 1959.2075, |
| 4.907895 |          |            | 4.902015 |          |            | 4.896134 |          |            |
| 31444,   | 4949848, | 1963.8521, | 31482,   | 5142816, | 1961.4988, | 31520,   | 5345570, | 1959.1456, |
| 4.907741 |          |            | 4.901860 |          |            | 4.895979 |          |            |
| 31445,   | 4952370, | 1963.7901, | 31483,   | 5145506, | 1961.4369, | 31521,   | 5347958, | 1959.0837, |
| 4.907586 |          |            | 4.901705 |          |            | 4.895824 |          |            |
| 31446,   | 4954908, | 1963.7282, | 31484,   | 5148652, | 1961.3750, | 31522,   | 5350874, | 1959.0218, |
| 4.907431 |          |            | 4.901550 |          |            | 4.895670 |          |            |
| 31447,   | 4960302, | 1963.6663, | 31485,   | 5154532, | 1961.3130, | 31523,   | 5356948, | 1958.9598, |
| 4.907276 |          |            | 4.901396 |          |            | 4.895515 |          |            |
| 31448,   | 4968162, | 1963.6043, | 31486,   | 5162088, | 1961.2511, | 31524,   | 5365080, | 1958.8979, |
| 4.907122 |          |            | 4.901241 |          |            | 4.895360 |          |            |
| 31449,   | 4975402, | 1963.5424, | 31487,   | 5168218, | 1961.1892, | 31525,   | 5371884, | 1958.8360, |
| 4.906967 |          |            | 4.901086 |          |            | 4.895205 |          |            |
| 31450,   | 4979886, | 1963.4805, | 31488,   | 5171574, | 1961.1273, | 31526,   | 5375726, | 1958.7740, |
| 4.906812 |          |            | 4.900931 |          |            | 4.895051 |          |            |
| 31451,   | 4982840, | 1963.4186, | 31489,   | 5174296, | 1961.0653, | 31527,   | 5378552, | 1958.7121, |
| 4.906657 |          |            | 4.900777 |          |            | 4.894896 |          |            |
| 31452,   | 4987240, | 1963.3566, | 31490,   | 5179542, | 1961.0034, | 31528,   | 5383416, | 1958.6502, |
| 4.906503 |          |            | 4.900622 |          |            | 4.894741 |          |            |
| 31453,   | 4994156, | 1963.2947, | 31491,   | 5187686, | 1960.9415, | 31529,   | 5390804, | 1958.5883, |
| 4.906348 |          |            | 4.900467 |          |            | 4.894586 |          |            |
| 31454,   | 5001492, | 1963.2328, | 31492,   | 5195778, | 1960.8796, | 31530,   | 5398166, | 1958.5263, |
| 4.906193 |          |            | 4.900312 |          |            | 4.894431 |          |            |
| 31455,   | 5006556, | 1963.1709, | 31493,   | 5200904, | 1960.8176, | 31531,   | 5403156, | 1958.4644, |
| 4.906038 |          |            | 4.900158 |          |            | 4.894277 |          |            |
| 31456,   | 5009312, | 1963.1089, | 31494,   | 5203534, | 1960.7557, | 31532,   | 5406578, | 1958.4025, |
| 4.905884 |          |            | 4.900003 |          |            | 4.894122 |          |            |
| 31457,   | 5012390, | 1963.0470, | 31495,   | 5206910, | 1960.6938, | 31533,   | 5411392, | 1958.3406, |
| 4.905729 |          |            | 4.899848 |          |            | 4.893967 |          |            |
| 31458,   | 5017862, | 1962.9851, | 31496,   | 5213166, | 1960.6319, | 31534,   | 5419002, | 1958.2786, |
| 4.905574 |          |            | 4.899693 |          |            | 4.893812 |          |            |
| 31459,   | 5024762, | 1962.9231, | 31497,   | 5220890, | 1960.5699, | 31535,   | 5427396, | 1958.2167, |
| 4.905419 |          |            | 4.899538 |          |            | 4.893658 |          |            |
| 31460,   | 5030332, | 1962.8612, | 31498,   | 5226882, | 1960.5080, | 31536,   | 5433446, | 1958.1548, |
| 4.905265 |          |            | 4.899384 |          |            | 4.893503 |          |            |
| 31461,   | 5033492, | 1962.7993, | 31499,   | 5230048, | 1960.4461, | 31537,   | 5436686, | 1958.0929, |
| 4.905110 |          |            | 4.899229 |          |            | 4.893348 |          |            |
| 31462,   | 5036272, | 1962.7374, | 31500,   | 5232684, | 1960.3841, | 31538,   | 5439996, | 1958.0309, |
| 4.904955 |          |            | 4.899074 |          |            | 4.893193 |          |            |
| 31463,   | 5041394, | 1962.6754, | 31501,   | 5237672, | 1960.3222, | 31539,   | 5446278, | 1957.9690, |
| 4.904800 |          |            | 4.898919 |          |            | 4.893039 |          |            |
| 31464,   | 5048918, | 1962.6135, | 31502,   | 5245040, | 1960.2603, | 31540,   | 5455054, | 1957.9071, |
| 4.904645 |          |            | 4.898765 |          |            | 4.892884 |          |            |
| 31465,   | 5056018, | 1962.5516, | 31503,   | 5251960, | 1960.1984, | 31541,   | 5463036, | 1957.8451, |
| 4.904491 |          |            | 4.898610 |          |            | 4.892729 |          |            |
| 31466,   | 5060254, | 1962.4897, | 31504,   | 5256236, | 1960.1364, | 31542,   | 5468016, | 1957.7832, |
| 4.904336 |          |            | 4.898455 |          |            | 4.892574 |          |            |
| 31467,   | 5062474, | 1962.4277, | 31505,   | 5259008, | 1960.0745, | 31543,   | 5471428, | 1957.7213, |
| 4.904181 |          |            | 4.898300 |          |            | 4.892420 |          |            |
| 31468,   | 5065868, | 1962.3658, | 31506,   | 5263382, | 1960.0126, | 31544,   | 5476574, | 1957.6594, |
| 4.904026 |          |            | 4.898146 |          |            | 4.892265 |          |            |
| 31469,   | 5072272, | 1962.3039, | 31507,   | 5270660, | 1959.9507, | 31545,   | 5484640, | 1957.5974, |
| 4.903872 |          |            | 4.897991 |          |            | 4.892110 |          |            |
| 31470,   | 5080096, | 1962.2420, | 31508,   | 5278720, | 1959.8887, | 31546,   | 5493282, | 1957.5355, |
| 4.903717 |          |            | 4.897836 |          |            | 4.891955 |          |            |
| 31471,   | 5086304, | 1962.1800, | 31509,   | 5284540, | 1959.8268, | 31547,   | 5499442, | 1957.4736, |
| 4.903562 |          |            | 4.897681 |          |            | 4.891801 |          |            |
| 31472,   | 5089998, | 1962.1181, | 31510,   | 5287822, | 1959.7649, | 31548,   | 5503002, | 1957.4117, |
| 4.903407 |          |            | 4.897527 |          |            | 4.891646 |          |            |



|          |          |            |          |          |            |          |          |            |
|----------|----------|------------|----------|----------|------------|----------|----------|------------|
| 31549,   | 5506838, | 1957.3497, | 31587,   | 5733084, | 1954.9965, | 31625,   | 5973484, | 1952.6433, |
| 4.891491 |          |            | 4.885610 |          |            | 4.879730 |          |            |
| 31550,   | 5513310, | 1957.2878, | 31588,   | 5740730, | 1954.9346, | 31626,   | 5980886, | 1952.5814, |
| 4.891336 |          |            | 4.885456 |          |            | 4.879575 |          |            |
| 31551,   | 5521362, | 1957.2259, | 31589,   | 5750108, | 1954.8727, | 31627,   | 5989896, | 1952.5194, |
| 4.891182 |          |            | 4.885301 |          |            | 4.879420 |          |            |
| 31552,   | 5527864, | 1957.1639, | 31590,   | 5757700, | 1954.8107, | 31628,   | 5997062, | 1952.4575, |
| 4.891027 |          |            | 4.885146 |          |            | 4.879265 |          |            |
| 31553,   | 5531466, | 1957.1020, | 31591,   | 5762144, | 1954.7488, | 31629,   | 6001314, | 1952.3956, |
| 4.890872 |          |            | 4.884991 |          |            | 4.879110 |          |            |
| 31554,   | 5534368, | 1957.0401, | 31592,   | 5765708, | 1954.6869, | 31630,   | 6005178, | 1952.3336, |
| 4.890717 |          |            | 4.884837 |          |            | 4.878956 |          |            |
| 31555,   | 5539756, | 1956.9782, | 31593,   | 5771456, | 1954.6249, | 31631,   | 6011654, | 1952.2717, |
| 4.890563 |          |            | 4.884682 |          |            | 4.878801 |          |            |
| 31556,   | 5547972, | 1956.9162, | 31594,   | 5779500, | 1954.5630, | 31632,   | 6020624, | 1952.2098, |
| 4.890408 |          |            | 4.884527 |          |            | 4.878646 |          |            |
| 31557,   | 5556024, | 1956.8543, | 31595,   | 5786916, | 1954.5011, | 31633,   | 6029104, | 1952.1479, |
| 4.890253 |          |            | 4.884372 |          |            | 4.878491 |          |            |
| 31558,   | 5561054, | 1956.7924, | 31596,   | 5791380, | 1954.4392, | 31634,   | 6034932, | 1952.0859, |
| 4.890098 |          |            | 4.884217 |          |            | 4.878337 |          |            |
| 31559,   | 5563692, | 1956.7305, | 31597,   | 5794142, | 1954.3772, | 31635,   | 6039428, | 1952.0240, |
| 4.889944 |          |            | 4.884063 |          |            | 4.878182 |          |            |
| 31560,   | 5567264, | 1956.6685, | 31598,   | 5798682, | 1954.3153, | 31636,   | 6045714, | 1951.9621, |
| 4.889789 |          |            | 4.883908 |          |            | 4.878027 |          |            |
| 31561,   | 5573836, | 1956.6066, | 31599,   | 5806602, | 1954.2534, | 31637,   | 6054778, | 1951.9002, |
| 4.889634 |          |            | 4.883753 |          |            | 4.877872 |          |            |
| 31562,   | 5581808, | 1956.5447, | 31600,   | 5815704, | 1954.1915, | 31638,   | 6064138, | 1951.8382, |
| 4.889479 |          |            | 4.883598 |          |            | 4.877718 |          |            |
| 31563,   | 5587934, | 1956.4828, | 31601,   | 5822564, | 1954.1295, | 31639,   | 6070726, | 1951.7763, |
| 4.889324 |          |            | 4.883444 |          |            | 4.877563 |          |            |
| 31564,   | 5591306, | 1956.4208, | 31602,   | 5826558, | 1954.0676, | 31640,   | 6074628, | 1951.7144, |
| 4.889170 |          |            | 4.883289 |          |            | 4.877408 |          |            |
| 31565,   | 5594540, | 1956.3589, | 31603,   | 5830546, | 1954.0057, | 31641,   | 6079056, | 1951.6525, |
| 4.889015 |          |            | 4.883134 |          |            | 4.877253 |          |            |
| 31566,   | 5600690, | 1956.2970, | 31604,   | 5837386, | 1953.9437, | 31642,   | 6086616, | 1951.5905, |
| 4.888860 |          |            | 4.882979 |          |            | 4.877099 |          |            |
| 31567,   | 5609628, | 1956.2350, | 31605,   | 5846484, | 1953.8818, | 31643,   | 6096234, | 1951.5286, |
| 4.888705 |          |            | 4.882825 |          |            | 4.876944 |          |            |
| 31568,   | 5618218, | 1956.1731, | 31606,   | 5854530, | 1953.8199, | 31644,   | 6104516, | 1951.4667, |
| 4.888551 |          |            | 4.882670 |          |            | 4.876789 |          |            |
| 31569,   | 5624032, | 1956.1112, | 31607,   | 5859484, | 1953.7580, | 31645,   | 6109826, | 1951.4047, |
| 4.888396 |          |            | 4.882515 |          |            | 4.876634 |          |            |
| 31570,   | 5628178, | 1956.0493, | 31608,   | 5863064, | 1953.6960, | 31646,   | 6114240, | 1951.3428, |
| 4.888241 |          |            | 4.882360 |          |            | 4.876480 |          |            |
| 31571,   | 5633780, | 1955.9873, | 31609,   | 5868708, | 1953.6341, | 31647,   | 6120960, | 1951.2809, |
| 4.888086 |          |            | 4.882206 |          |            | 4.876325 |          |            |
| 31572,   | 5642106, | 1955.9254, | 31610,   | 5877458, | 1953.5722, | 31648,   | 6130408, | 1951.2190, |
| 4.887932 |          |            | 4.882051 |          |            | 4.876170 |          |            |
| 31573,   | 5650896, | 1955.8635, | 31611,   | 5886712, | 1953.5103, | 31649,   | 6139646, | 1951.1570, |
| 4.887777 |          |            | 4.881896 |          |            | 4.876015 |          |            |
| 31574,   | 5657088, | 1955.8016, | 31612,   | 5893368, | 1953.4483, | 31650,   | 6145924, | 1951.0951, |
| 4.887622 |          |            | 4.881741 |          |            | 4.875861 |          |            |
| 31575,   | 5660558, | 1955.7396, | 31613,   | 5897516, | 1953.3864, | 31651,   | 6150014, | 1951.0332, |
| 4.887467 |          |            | 4.881587 |          |            | 4.875706 |          |            |
| 31576,   | 5664390, | 1955.6777, | 31614,   | 5902294, | 1953.3245, | 31652,   | 6155286, | 1950.9713, |
| 4.887313 |          |            | 4.881432 |          |            | 4.875551 |          |            |
| 31577,   | 5671292, | 1955.6158, | 31615,   | 5910060, | 1953.2626, | 31653,   | 6163634, | 1950.9093, |
| 4.887158 |          |            | 4.881277 |          |            | 4.875396 |          |            |
| 31578,   | 5680402, | 1955.5538, | 31616,   | 5919506, | 1953.2006, | 31654,   | 6173112, | 1950.8474, |
| 4.887003 |          |            | 4.881122 |          |            | 4.875242 |          |            |
| 31579,   | 5688350, | 1955.4919, | 31617,   | 5927224, | 1953.1387, | 31655,   | 6180236, | 1950.7855, |
| 4.886848 |          |            | 4.880968 |          |            | 4.875087 |          |            |
| 31580,   | 5693268, | 1955.4300, | 31618,   | 5931850, | 1953.0768, | 31656,   | 6184232, | 1950.7235, |
| 4.886694 |          |            | 4.880813 |          |            | 4.874932 |          |            |
| 31581,   | 5696970, | 1955.3681, | 31619,   | 5935784, | 1953.0148, | 31657,   | 6188102, | 1950.6616, |
| 4.886539 |          |            | 4.880658 |          |            | 4.874777 |          |            |
| 31582,   | 5702700, | 1955.3061, | 31620,   | 5942336, | 1952.9529, | 31658,   | 6195168, | 1950.5997, |
| 4.886384 |          |            | 4.880503 |          |            | 4.874623 |          |            |
| 31583,   | 5711166, | 1955.2442, | 31621,   | 5951728, | 1952.8910, | 31659,   | 6205212, | 1950.5378, |
| 4.886229 |          |            | 4.880349 |          |            | 4.874468 |          |            |
| 31584,   | 5719662, | 1955.1823, | 31622,   | 5960704, | 1952.8291, | 31660,   | 6214770, | 1950.4758, |
| 4.886075 |          |            | 4.880194 |          |            | 4.874313 |          |            |
| 31585,   | 5725334, | 1955.1204, | 31623,   | 5966314, | 1952.7671, | 31661,   | 6221246, | 1950.4139, |
| 4.885920 |          |            | 4.880039 |          |            | 4.874158 |          |            |
| 31586,   | 5728696, | 1955.0584, | 31624,   | 5969366, | 1952.7052, | 31662,   | 6225922, | 1950.3520, |
| 4.885765 |          |            | 4.879884 |          |            | 4.874003 |          |            |

|          |          |            |          |          |            |          |          |            |
|----------|----------|------------|----------|----------|------------|----------|----------|------------|
| 31663,   | 6232260, | 1950.2901, | 31701,   | 6505404, | 1947.9368, | 31739,   | 6799812, | 1945.5836, |
| 4.873849 |          |            | 4.867968 |          |            | 4.862087 |          |            |
| 31664,   | 6241582, | 1950.2281, | 31702,   | 6515568, | 1947.8749, | 31740,   | 6810276, | 1945.5217, |
| 4.873694 |          |            | 4.867813 |          |            | 4.861932 |          |            |
| 31665,   | 6251342, | 1950.1662, | 31703,   | 6526186, | 1947.8130, | 31741,   | 6820756, | 1945.4598, |
| 4.873539 |          |            | 4.867658 |          |            | 4.861778 |          |            |
| 31666,   | 6258180, | 1950.1043, | 31704,   | 6533802, | 1947.7511, | 31742,   | 6827934, | 1945.3978, |
| 4.873384 |          |            | 4.867504 |          |            | 4.861623 |          |            |
| 31667,   | 6262044, | 1950.0424, | 31705,   | 6538546, | 1947.6891, | 31743,   | 6832456, | 1945.3359, |
| 4.873230 |          |            | 4.867349 |          |            | 4.861468 |          |            |
| 31668,   | 6266478, | 1949.9804, | 31706,   | 6543988, | 1947.6272, | 31744,   | 6838266, | 1945.2740, |
| 4.873075 |          |            | 4.867194 |          |            | 4.861313 |          |            |
| 31669,   | 6274536, | 1949.9185, | 31707,   | 6552912, | 1947.5653, | 31745,   | 6847944, | 1945.2121, |
| 4.872920 |          |            | 4.867039 |          |            | 4.861159 |          |            |
| 31670,   | 6285250, | 1949.8566, | 31708,   | 6564028, | 1947.5033, | 31746,   | 6859568, | 1945.1501, |
| 4.872765 |          |            | 4.866885 |          |            | 4.861004 |          |            |
| 31671,   | 6294718, | 1949.7946, | 31709,   | 6573586, | 1947.4414, | 31747,   | 6868926, | 1945.0882, |
| 4.872611 |          |            | 4.866730 |          |            | 4.860849 |          |            |
| 31672,   | 6300626, | 1949.7327, | 31710,   | 6579870, | 1947.3795, | 31748,   | 6874478, | 1945.0263, |
| 4.872456 |          |            | 4.866575 |          |            | 4.860694 |          |            |
| 31673,   | 6304820, | 1949.6708, | 31711,   | 6585202, | 1947.3176, | 31749,   | 6879158, | 1944.9643, |
| 4.872301 |          |            | 4.866420 |          |            | 4.860540 |          |            |
| 31674,   | 6310928, | 1949.6089, | 31712,   | 6593012, | 1947.2556, | 31750,   | 6886900, | 1944.9024, |
| 4.872146 |          |            | 4.866266 |          |            | 4.860385 |          |            |
| 31675,   | 6320004, | 1949.5469, | 31713,   | 6603574, | 1947.1937, | 31751,   | 6898022, | 1944.8405, |
| 4.871992 |          |            | 4.866111 |          |            | 4.860230 |          |            |
| 31676,   | 6329366, | 1949.4850, | 31714,   | 6613618, | 1947.1318, | 31752,   | 6908930, | 1944.7786, |
| 4.871837 |          |            | 4.865956 |          |            | 4.860075 |          |            |
| 31677,   | 6336036, | 1949.4231, | 31715,   | 6620288, | 1947.0699, | 31753,   | 6916452, | 1944.7166, |
| 4.871682 |          |            | 4.865801 |          |            | 4.859921 |          |            |
| 31678,   | 6340474, | 1949.3612, | 31716,   | 6624676, | 1947.0079, | 31754,   | 6921550, | 1944.6547, |
| 4.871527 |          |            | 4.865647 |          |            | 4.859766 |          |            |
| 31679,   | 6346120, | 1949.2992, | 31717,   | 6630618, | 1946.9460, | 31755,   | 6928032, | 1944.5928, |
| 4.871373 |          |            | 4.865492 |          |            | 4.859611 |          |            |
| 31680,   | 6355220, | 1949.2373, | 31718,   | 6640098, | 1946.8841, | 31756,   | 6937902, | 1944.5309, |
| 4.871218 |          |            | 4.865337 |          |            | 4.859456 |          |            |
| 31681,   | 6366004, | 1949.1754, | 31719,   | 6650820, | 1946.8222, | 31757,   | 6948970, | 1944.4689, |
| 4.871063 |          |            | 4.865182 |          |            | 4.859301 |          |            |
| 31682,   | 6374680, | 1949.1134, | 31720,   | 6658908, | 1946.7602, | 31758,   | 6957622, | 1944.4070, |
| 4.870908 |          |            | 4.865028 |          |            | 4.859147 |          |            |
| 31683,   | 6379870, | 1949.0515, | 31721,   | 6663526, | 1946.6983, | 31759,   | 6963292, | 1944.3451, |
| 4.870754 |          |            | 4.864873 |          |            | 4.858992 |          |            |
| 31684,   | 6384184, | 1948.9896, | 31722,   | 6667930, | 1946.6364, | 31760,   | 6969246, | 1944.2832, |
| 4.870599 |          |            | 4.864718 |          |            | 4.858837 |          |            |
| 31685,   | 6391062, | 1948.9277, | 31723,   | 6675618, | 1946.5744, | 31761,   | 6978628, | 1944.2212, |
| 4.870444 |          |            | 4.864563 |          |            | 4.858682 |          |            |
| 31686,   | 6400628, | 1948.8657, | 31724,   | 6686184, | 1946.5125, | 31762,   | 6990614, | 1944.1593, |
| 4.870289 |          |            | 4.864409 |          |            | 4.858528 |          |            |
| 31687,   | 6409570, | 1948.8038, | 31725,   | 6695852, | 1946.4506, | 31763,   | 7001270, | 1944.0974, |
| 4.870135 |          |            | 4.864254 |          |            | 4.858373 |          |            |
| 31688,   | 6415204, | 1948.7419, | 31726,   | 6702050, | 1946.3887, | 31764,   | 7008172, | 1944.0354, |
| 4.869980 |          |            | 4.864099 |          |            | 4.858218 |          |            |
| 31689,   | 6418806, | 1948.6800, | 31727,   | 6706562, | 1946.3267, | 31765,   | 7013238, | 1943.9735, |
| 4.869825 |          |            | 4.863944 |          |            | 4.858063 |          |            |
| 31690,   | 6424182, | 1948.6180, | 31728,   | 6713406, | 1946.2648, | 31766,   | 7020378, | 1943.9116, |
| 4.869670 |          |            | 4.863789 |          |            | 4.857909 |          |            |
| 31691,   | 6433170, | 1948.5561, | 31729,   | 6723968, | 1946.2029, | 31767,   | 7030810, | 1943.8497, |
| 4.869516 |          |            | 4.863635 |          |            | 4.857754 |          |            |
| 31692,   | 6443436, | 1948.4942, | 31730,   | 6735200, | 1946.1410, | 31768,   | 7041682, | 1943.7877, |
| 4.869361 |          |            | 4.863480 |          |            | 4.857599 |          |            |
| 31693,   | 6451254, | 1948.4323, | 31731,   | 6743122, | 1946.0790, | 31769,   | 7049614, | 1943.7258, |
| 4.869206 |          |            | 4.863325 |          |            | 4.857444 |          |            |
| 31694,   | 6455922, | 1948.3703, | 31732,   | 6747498, | 1946.0171, | 31770,   | 7054868, | 1943.6639, |
| 4.869051 |          |            | 4.863170 |          |            | 4.857290 |          |            |
| 31695,   | 6460566, | 1948.3084, | 31733,   | 6752124, | 1945.9552, | 31771,   | 7061056, | 1943.6020, |
| 4.868896 |          |            | 4.863016 |          |            | 4.857135 |          |            |
| 31696,   | 6468352, | 1948.2465, | 31734,   | 6760420, | 1945.8933, | 31772,   | 7070742, | 1943.5400, |
| 4.868742 |          |            | 4.862861 |          |            | 4.856980 |          |            |
| 31697,   | 6478704, | 1948.1845, | 31735,   | 6771490, | 1945.8313, | 31773,   | 7082256, | 1943.4781, |
| 4.868587 |          |            | 4.862706 |          |            | 4.856825 |          |            |
| 31698,   | 6488012, | 1948.1226, | 31736,   | 6781328, | 1945.7694, | 31774,   | 7091654, | 1943.4162, |
| 4.868432 |          |            | 4.862551 |          |            | 4.856671 |          |            |
| 31699,   | 6494028, | 1948.0607, | 31737,   | 6787654, | 1945.7075, | 31775,   | 7097512, | 1943.3542, |
| 4.868277 |          |            | 4.862397 |          |            | 4.856516 |          |            |
| 31700,   | 6498590, | 1947.9988, | 31738,   | 6792548, | 1945.6455, | 31776,   | 7102770, | 1943.2923, |
| 4.868123 |          |            | 4.862242 |          |            | 4.856361 |          |            |

|          |          |            |          |          |            |          |          |            |
|----------|----------|------------|----------|----------|------------|----------|----------|------------|
| 31777,   | 7111312, | 1943.2304, | 31815,   | 7456446, | 1940.8772, | 31853,   | 7815382, | 1938.5239, |
| 4.856206 |          |            | 4.850326 |          |            | 4.844445 |          |            |
| 31778,   | 7123310, | 1943.1685, | 31816,   | 7470458, | 1940.8152, | 31854,   | 7828778, | 1938.4620, |
| 4.856052 |          |            | 4.850171 |          |            | 4.844290 |          |            |
| 31779,   | 7134914, | 1943.1065, | 31817,   | 7483364, | 1940.7533, | 31855,   | 7840696, | 1938.4001, |
| 4.855897 |          |            | 4.850016 |          |            | 4.844135 |          |            |
| 31780,   | 7142700, | 1943.0446, | 31818,   | 7491968, | 1940.6914, | 31856,   | 7848430, | 1938.3382, |
| 4.855742 |          |            | 4.849861 |          |            | 4.843980 |          |            |
| 31781,   | 7147664, | 1942.9827, | 31819,   | 7497694, | 1940.6295, | 31857,   | 7854166, | 1938.2762, |
| 4.855587 |          |            | 4.849707 |          |            | 4.843826 |          |            |
| 31782,   | 7154030, | 1942.9208, | 31820,   | 7504788, | 1940.5675, | 31858,   | 7862454, | 1938.2143, |
| 4.855433 |          |            | 4.849552 |          |            | 4.843671 |          |            |
| 31783,   | 7164322, | 1942.8588, | 31821,   | 7515326, | 1940.5056, | 31859,   | 7874896, | 1938.1524, |
| 4.855278 |          |            | 4.849397 |          |            | 4.843516 |          |            |
| 31784,   | 7176530, | 1942.7969, | 31822,   | 7526960, | 1940.4437, | 31860,   | 7888380, | 1938.0905, |
| 4.855123 |          |            | 4.849242 |          |            | 4.843361 |          |            |
| 31785,   | 7186686, | 1942.7350, | 31823,   | 7536068, | 1940.3818, | 31861,   | 7898916, | 1938.0285, |
| 4.854968 |          |            | 4.849087 |          |            | 4.843207 |          |            |
| 31786,   | 7193656, | 1942.6731, | 31824,   | 7542374, | 1940.3198, | 31862,   | 7906426, | 1937.9666, |
| 4.854814 |          |            | 4.848933 |          |            | 4.843052 |          |            |
| 31787,   | 7200390, | 1942.6111, | 31825,   | 7549390, | 1940.2579, | 31863,   | 7914754, | 1937.9047, |
| 4.854659 |          |            | 4.848778 |          |            | 4.842897 |          |            |
| 31788,   | 7210168, | 1942.5492, | 31826,   | 7560094, | 1940.1960, | 31864,   | 7926896, | 1937.8428, |
| 4.854504 |          |            | 4.848623 |          |            | 4.842742 |          |            |
| 31789,   | 7222508, | 1942.4873, | 31827,   | 7573124, | 1940.1340, | 31865,   | 7941286, | 1937.7808, |
| 4.854349 |          |            | 4.848468 |          |            | 4.842588 |          |            |
| 31790,   | 7233634, | 1942.4253, | 31828,   | 7584196, | 1940.0721, | 31866,   | 7953620, | 1937.7189, |
| 4.854194 |          |            | 4.848314 |          |            | 4.842433 |          |            |
| 31791,   | 7241038, | 1942.3634, | 31829,   | 7591126, | 1940.0102, | 31867,   | 7961978, | 1937.6570, |
| 4.854040 |          |            | 4.848159 |          |            | 4.842278 |          |            |
| 31792,   | 7246516, | 1942.3015, | 31830,   | 7596512, | 1939.9483, | 31868,   | 7969136, | 1937.5950, |
| 4.853885 |          |            | 4.848004 |          |            | 4.842123 |          |            |
| 31793,   | 7254064, | 1942.2396, | 31831,   | 7604748, | 1939.8863, | 31869,   | 7979206, | 1937.5331, |
| 4.853730 |          |            | 4.847849 |          |            | 4.841969 |          |            |
| 31794,   | 7265080, | 1942.1776, | 31832,   | 7616894, | 1939.8244, | 31870,   | 7992692, | 1937.4712, |
| 4.853575 |          |            | 4.847695 |          |            | 4.841814 |          |            |
| 31795,   | 7276716, | 1942.1157, | 31833,   | 7629492, | 1939.7625, | 31871,   | 8005950, | 1937.4093, |
| 4.853421 |          |            | 4.847540 |          |            | 4.841659 |          |            |
| 31796,   | 7285362, | 1942.0538, | 31834,   | 7638716, | 1939.7006, | 31872,   | 8015622, | 1937.3473, |
| 4.853266 |          |            | 4.847385 |          |            | 4.841504 |          |            |
| 31797,   | 7291074, | 1941.9919, | 31835,   | 7644874, | 1939.6386, | 31873,   | 8022726, | 1937.2854, |
| 4.853111 |          |            | 4.847230 |          |            | 4.841350 |          |            |
| 31798,   | 7297554, | 1941.9299, | 31836,   | 7651920, | 1939.5767, | 31874,   | 8031344, | 1937.2235, |
| 4.852956 |          |            | 4.847076 |          |            | 4.841195 |          |            |
| 31799,   | 7307692, | 1941.8680, | 31837,   | 7662594, | 1939.5148, | 31875,   | 8043576, | 1937.1616, |
| 4.852802 |          |            | 4.846921 |          |            | 4.841040 |          |            |
| 31800,   | 7320018, | 1941.8061, | 31838,   | 7675086, | 1939.4529, | 31876,   | 8056844, | 1937.0996, |
| 4.852647 |          |            | 4.846766 |          |            | 4.840885 |          |            |
| 31801,   | 7330378, | 1941.7441, | 31839,   | 7685206, | 1939.3909, | 31877,   | 8066948, | 1937.0377, |
| 4.852492 |          |            | 4.846611 |          |            | 4.840731 |          |            |
| 31802,   | 7336892, | 1941.6822, | 31840,   | 7691480, | 1939.3290, | 31878,   | 8073216, | 1936.9758, |
| 4.852337 |          |            | 4.846457 |          |            | 4.840576 |          |            |
| 31803,   | 7342232, | 1941.6203, | 31841,   | 7696956, | 1939.2671, | 31879,   | 8079538, | 1936.9138, |
| 4.852183 |          |            | 4.846302 |          |            | 4.840421 |          |            |
| 31804,   | 7350464, | 1941.5584, | 31842,   | 7705588, | 1939.2051, | 31880,   | 8089920, | 1936.8519, |
| 4.852028 |          |            | 4.846147 |          |            | 4.840266 |          |            |
| 31805,   | 7362208, | 1941.4964, | 31843,   | 7717480, | 1939.1432, | 31881,   | 8103816, | 1936.7900, |
| 4.851873 |          |            | 4.845992 |          |            | 4.840112 |          |            |
| 31806,   | 7373900, | 1941.4345, | 31844,   | 7728874, | 1939.0813, | 31882,   | 8116824, | 1936.7281, |
| 4.851718 |          |            | 4.845838 |          |            | 4.839957 |          |            |
| 31807,   | 7382094, | 1941.3726, | 31845,   | 7736782, | 1939.0194, | 31883,   | 8125954, | 1936.6661, |
| 4.851564 |          |            | 4.845683 |          |            | 4.839802 |          |            |
| 31808,   | 7387620, | 1941.3107, | 31846,   | 7742796, | 1938.9574, | 31884,   | 8133138, | 1936.6042, |
| 4.851409 |          |            | 4.845528 |          |            | 4.839647 |          |            |
| 31809,   | 7394662, | 1941.2487, | 31847,   | 7751314, | 1938.8955, | 31885,   | 8142800, | 1936.5423, |
| 4.851254 |          |            | 4.845373 |          |            | 4.839493 |          |            |
| 31810,   | 7405804, | 1941.1868, | 31848,   | 7764292, | 1938.8336, | 31886,   | 8156366, | 1936.4804, |
| 4.851099 |          |            | 4.845219 |          |            | 4.839338 |          |            |
| 31811,   | 7419018, | 1941.1249, | 31849,   | 7778758, | 1938.7717, | 31887,   | 8170358, | 1936.4184, |
| 4.850945 |          |            | 4.845064 |          |            | 4.839183 |          |            |
| 31812,   | 7430152, | 1941.0630, | 31850,   | 7790168, | 1938.7097, | 31888,   | 8180472, | 1936.3565, |
| 4.850790 |          |            | 4.844909 |          |            | 4.839028 |          |            |
| 31813,   | 7437940, | 1941.0010, | 31851,   | 7797612, | 1938.6478, | 31889,   | 8186730, | 1936.2946, |
| 4.850635 |          |            | 4.844754 |          |            | 4.838873 |          |            |
| 31814,   | 7445486, | 1940.9391, | 31852,   | 7804768, | 1938.5859, | 31890,   | 8193610, | 1936.2327, |
| 4.850480 |          |            | 4.844600 |          |            | 4.838719 |          |            |

|          |          |            |          |          |            |          |          |            |
|----------|----------|------------|----------|----------|------------|----------|----------|------------|
| 31891,   | 8204850, | 1936.1707, | 31929,   | 8624790, | 1933.8175, | 31967,   | 9091258, | 1931.4643, |
| 4.838564 |          |            | 4.832683 |          |            | 4.826802 |          |            |
| 31892,   | 8219128, | 1936.1088, | 31930,   | 8639392, | 1933.7556, | 31968,   | 9110128, | 1931.4024, |
| 4.838409 |          |            | 4.832528 |          |            | 4.826648 |          |            |
| 31893,   | 8231708, | 1936.0469, | 31931,   | 8651682, | 1933.6936, | 31969,   | 9126382, | 1931.3404, |
| 4.838254 |          |            | 4.832374 |          |            | 4.826493 |          |            |
| 31894,   | 8240118, | 1935.9849, | 31932,   | 8659878, | 1933.6317, | 31970,   | 9138558, | 1931.2785, |
| 4.838100 |          |            | 4.832219 |          |            | 4.826338 |          |            |
| 31895,   | 8247032, | 1935.9230, | 31933,   | 8667312, | 1933.5698, | 31971,   | 9150374, | 1931.2166, |
| 4.837945 |          |            | 4.832064 |          |            | 4.826183 |          |            |
| 31896,   | 8257008, | 1935.8611, | 31934,   | 8678490, | 1933.5079, | 31972,   | 9166106, | 1931.1546, |
| 4.837790 |          |            | 4.831909 |          |            | 4.826029 |          |            |
| 31897,   | 8270958, | 1935.7992, | 31935,   | 8693764, | 1933.4459, | 31973,   | 9185272, | 1931.0927, |
| 4.837635 |          |            | 4.831755 |          |            | 4.825874 |          |            |
| 31898,   | 8285040, | 1935.7372, | 31936,   | 8708946, | 1933.3840, | 31974,   | 9203052, | 1931.0308, |
| 4.837481 |          |            | 4.831600 |          |            | 4.825719 |          |            |
| 31899,   | 8295258, | 1935.6753, | 31937,   | 8720370, | 1933.3221, | 31975,   | 9215990, | 1930.9689, |
| 4.837326 |          |            | 4.831445 |          |            | 4.825564 |          |            |
| 31900,   | 8302238, | 1935.6134, | 31938,   | 8729250, | 1933.2602, | 31976,   | 9226046, | 1930.9069, |
| 4.837171 |          |            | 4.831290 |          |            | 4.825410 |          |            |
| 31901,   | 8310478, | 1935.5515, | 31939,   | 8740162, | 1933.1982, | 31977,   | 9238082, | 1930.8450, |
| 4.837016 |          |            | 4.831136 |          |            | 4.825255 |          |            |
| 31902,   | 8322922, | 1935.4895, | 31940,   | 8755424, | 1933.1363, | 31978,   | 9253704, | 1930.7831, |
| 4.836862 |          |            | 4.830981 |          |            | 4.825100 |          |            |
| 31903,   | 8337446, | 1935.4276, | 31941,   | 8772258, | 1933.0744, | 31979,   | 9268936, | 1930.7212, |
| 4.836707 |          |            | 4.830826 |          |            | 4.824945 |          |            |
| 31904,   | 8349444, | 1935.3657, | 31942,   | 8786100, | 1933.0125, | 31980,   | 9278628, | 1930.6592, |
| 4.836552 |          |            | 4.830671 |          |            | 4.824791 |          |            |
| 31905,   | 8357414, | 1935.3037, | 31943,   | 8796090, | 1932.9505, | 31981,   | 9282550, | 1930.5973, |
| 4.836397 |          |            | 4.830517 |          |            | 4.824636 |          |            |
| 31906,   | 8364896, | 1935.2418, | 31944,   | 8806094, | 1932.8886, | 31982,   | 9285958, | 1930.5354, |
| 4.836243 |          |            | 4.830362 |          |            | 4.824481 |          |            |
| 31907,   | 8376356, | 1935.1799, | 31945,   | 8819952, | 1932.8267, | 31983,   | 9293924, | 1930.4735, |
| 4.836088 |          |            | 4.830207 |          |            | 4.824326 |          |            |
| 31908,   | 8391978, | 1935.1180, | 31946,   | 8836738, | 1932.7647, | 31984,   | 9306056, | 1930.4115, |
| 4.835933 |          |            | 4.830052 |          |            | 4.824172 |          |            |
| 31909,   | 8407506, | 1935.0560, | 31947,   | 8851748, | 1932.7028, | 31985,   | 9317678, | 1930.3496, |
| 4.835778 |          |            | 4.829898 |          |            | 4.824017 |          |            |
| 31910,   | 8419300, | 1934.9941, | 31948,   | 8862116, | 1932.6409, | 31986,   | 9325854, | 1930.2877, |
| 4.835624 |          |            | 4.829743 |          |            | 4.823862 |          |            |
| 31911,   | 8428454, | 1934.9322, | 31949,   | 8870296, | 1932.5790, | 31987,   | 9332990, | 1930.2257, |
| 4.835469 |          |            | 4.829588 |          |            | 4.823707 |          |            |
| 31912,   | 8439172, | 1934.8703, | 31950,   | 8881182, | 1932.5170, | 31988,   | 9343758, | 1930.1638, |
| 4.835314 |          |            | 4.829433 |          |            | 4.823552 |          |            |
| 31913,   | 8453406, | 1934.8083, | 31951,   | 8896232, | 1932.4551, | 31989,   | 9359294, | 1930.1019, |
| 4.835159 |          |            | 4.829279 |          |            | 4.823398 |          |            |
| 31914,   | 8468370, | 1934.7464, | 31952,   | 8911712, | 1932.3932, | 31990,   | 9375714, | 1930.0400, |
| 4.835005 |          |            | 4.829124 |          |            | 4.823243 |          |            |
| 31915,   | 8479932, | 1934.6845, | 31953,   | 8923126, | 1932.3313, | 31991,   | 9388698, | 1929.9780, |
| 4.834850 |          |            | 4.828969 |          |            | 4.823088 |          |            |
| 31916,   | 8487748, | 1934.6226, | 31954,   | 8930606, | 1932.2693, | 31992,   | 9398610, | 1929.9161, |
| 4.834695 |          |            | 4.828814 |          |            | 4.822933 |          |            |
| 31917,   | 8495832, | 1934.5606, | 31955,   | 8938762, | 1932.2074, | 31993,   | 9409822, | 1929.8542, |
| 4.834540 |          |            | 4.828659 |          |            | 4.822779 |          |            |
| 31918,   | 8507792, | 1934.4987, | 31956,   | 8951170, | 1932.1455, | 31994,   | 9425134, | 1929.7923, |
| 4.834386 |          |            | 4.828505 |          |            | 4.822624 |          |            |
| 31919,   | 8522460, | 1934.4368, | 31957,   | 8966120, | 1932.0836, | 31995,   | 9442098, | 1929.7303, |
| 4.834231 |          |            | 4.828350 |          |            | 4.822469 |          |            |
| 31920,   | 8535206, | 1934.3748, | 31958,   | 8978770, | 1932.0216, | 31996,   | 9455788, | 1929.6684, |
| 4.834076 |          |            | 4.828195 |          |            | 4.822314 |          |            |
| 31921,   | 8543486, | 1934.3129, | 31959,   | 8987120, | 1931.9597, | 31997,   | 9464780, | 1929.6065, |
| 4.833921 |          |            | 4.828040 |          |            | 4.822160 |          |            |
| 31922,   | 8549950, | 1934.2510, | 31960,   | 8994670, | 1931.8978, | 31998,   | 9473070, | 1929.5445, |
| 4.833766 |          |            | 4.827886 |          |            | 4.822005 |          |            |
| 31923,   | 8559360, | 1934.1891, | 31961,   | 9006434, | 1931.8358, | 31999,   | 9485526, | 1929.4826, |
| 4.833612 |          |            | 4.827731 |          |            | 4.821850 |          |            |
| 31924,   | 8572978, | 1934.1271, | 31962,   | 9023056, | 1931.7739, | 32000,   | 9502248, | 1929.4207, |
| 4.833457 |          |            | 4.827576 |          |            | 4.821695 |          |            |
| 31925,   | 8587096, | 1934.0652, | 31963,   | 9040054, | 1931.7120, | 32001,   | 9518594, | 1929.3588, |
| 4.833302 |          |            | 4.827421 |          |            | 4.821541 |          |            |
| 31926,   | 8597494, | 1934.0033, | 31964,   | 9053080, | 1931.6501, | 32002,   | 9530830, | 1929.2968, |
| 4.833147 |          |            | 4.827267 |          |            | 4.821386 |          |            |
| 31927,   | 8604498, | 1933.9414, | 31965,   | 9063000, | 1931.5881, | 32003,   | 9540636, | 1929.2349, |
| 4.832993 |          |            | 4.827112 |          |            | 4.821231 |          |            |
| 31928,   | 8612532, | 1933.8794, | 31966,   | 9074722, | 1931.5262, | 32004,   | 9553070, | 1929.1730, |
| 4.832838 |          |            | 4.826957 |          |            | 4.821076 |          |            |

|          |           |            |          |           |            |          |           |            |
|----------|-----------|------------|----------|-----------|------------|----------|-----------|------------|
| 32005,   | 9570400,  | 1929.1111, | 32043,   | 10130376, | 1926.7578, | 32081,   | 10719214, | 1924.4046, |
| 4.820922 |           |            | 4.815041 |           |            | 4.809160 |           |            |
| 32006,   | 9589324,  | 1929.0491, | 32044,   | 10150588, | 1926.6959, | 32082,   | 10740424, | 1924.3427, |
| 4.820767 |           |            | 4.814886 |           |            | 4.809005 |           |            |
| 32007,   | 9604904,  | 1928.9872, | 32045,   | 10166354, | 1926.6340, | 32083,   | 10756742, | 1924.2808, |
| 4.820612 |           |            | 4.814731 |           |            | 4.808850 |           |            |
| 32008,   | 9616502,  | 1928.9253, | 32046,   | 10177378, | 1926.5721, | 32084,   | 10768654, | 1924.2188, |
| 4.820457 |           |            | 4.814577 |           |            | 4.808696 |           |            |
| 32009,   | 9628554,  | 1928.8634, | 32047,   | 10188856, | 1926.5101, | 32085,   | 10781622, | 1924.1569, |
| 4.820303 |           |            | 4.814422 |           |            | 4.808541 |           |            |
| 32010,   | 9645172,  | 1928.8014, | 32048,   | 10205298, | 1926.4482, | 32086,   | 10799398, | 1924.0950, |
| 4.820148 |           |            | 4.814267 |           |            | 4.808386 |           |            |
| 32011,   | 9665034,  | 1928.7395, | 32049,   | 10225188, | 1926.3863, | 32087,   | 10819508, | 1924.0331, |
| 4.819993 |           |            | 4.814112 |           |            | 4.808231 |           |            |
| 32012,   | 9682772,  | 1928.6776, | 32050,   | 10242848, | 1926.3243, | 32088,   | 10836300, | 1923.9711, |
| 4.819838 |           |            | 4.813957 |           |            | 4.808077 |           |            |
| 32013,   | 9695264,  | 1928.6156, | 32051,   | 10255200, | 1926.2624, | 32089,   | 10847952, | 1923.9092, |
| 4.819684 |           |            | 4.813803 |           |            | 4.807922 |           |            |
| 32014,   | 9705304,  | 1928.5537, | 32052,   | 10265336, | 1926.2005, | 32090,   | 10858932, | 1923.8473, |
| 4.819529 |           |            | 4.813648 |           |            | 4.807767 |           |            |
| 32015,   | 9718250,  | 1928.4918, | 32053,   | 10278708, | 1926.1386, | 32091,   | 10874816, | 1923.7853, |
| 4.819374 |           |            | 4.813493 |           |            | 4.807612 |           |            |
| 32016,   | 9735620,  | 1928.4299, | 32054,   | 10296534, | 1926.0766, | 32092,   | 10895638, | 1923.7234, |
| 4.819219 |           |            | 4.813338 |           |            | 4.807458 |           |            |
| 32017,   | 9753306,  | 1928.3679, | 32055,   | 10314406, | 1926.0147, | 32093,   | 10915726, | 1923.6615, |
| 4.819065 |           |            | 4.813184 |           |            | 4.807303 |           |            |
| 32018,   | 9766568,  | 1928.3060, | 32056,   | 10327692, | 1925.9528, | 32094,   | 10930332, | 1923.5996, |
| 4.818910 |           |            | 4.813029 |           |            | 4.807148 |           |            |
| 32019,   | 9775756,  | 1928.2441, | 32057,   | 10337206, | 1925.8909, | 32095,   | 10941192, | 1923.5376, |
| 4.818755 |           |            | 4.812874 |           |            | 4.806993 |           |            |
| 32020,   | 9785988,  | 1928.1822, | 32058,   | 10348286, | 1925.8289, | 32096,   | 10954418, | 1923.4757, |
| 4.818600 |           |            | 4.812719 |           |            | 4.806839 |           |            |
| 32021,   | 9801084,  | 1928.1202, | 32059,   | 10364418, | 1925.7670, | 32097,   | 10973224, | 1923.4138, |
| 4.818445 |           |            | 4.812565 |           |            | 4.806684 |           |            |
| 32022,   | 9819074,  | 1928.0583, | 32060,   | 10383094, | 1925.7051, | 32098,   | 10994220, | 1923.3519, |
| 4.818291 |           |            | 4.812410 |           |            | 4.806529 |           |            |
| 32023,   | 9834656,  | 1927.9964, | 32061,   | 10398920, | 1925.6432, | 32099,   | 11011602, | 1923.2899, |
| 4.818136 |           |            | 4.812255 |           |            | 4.806374 |           |            |
| 32024,   | 9845648,  | 1927.9344, | 32062,   | 10410198, | 1925.5812, | 32100,   | 11024222, | 1923.2280, |
| 4.817981 |           |            | 4.812100 |           |            | 4.806220 |           |            |
| 32025,   | 9855620,  | 1927.8725, | 32063,   | 10421052, | 1925.5193, | 32101,   | 11037008, | 1923.1661, |
| 4.817826 |           |            | 4.811946 |           |            | 4.806065 |           |            |
| 32026,   | 9869592,  | 1927.8106, | 32064,   | 10436492, | 1925.4574, | 32102,   | 11055058, | 1923.1041, |
| 4.817672 |           |            | 4.811791 |           |            | 4.805910 |           |            |
| 32027,   | 9887952,  | 1927.7487, | 32065,   | 10456382, | 1925.3954, | 32103,   | 11077518, | 1923.0422, |
| 4.817517 |           |            | 4.811636 |           |            | 4.805755 |           |            |
| 32028,   | 9905932,  | 1927.6867, | 32066,   | 10475568, | 1925.3335, | 32104,   | 11098618, | 1922.9803, |
| 4.817362 |           |            | 4.811481 |           |            | 4.805601 |           |            |
| 32029,   | 9919334,  | 1927.6248, | 32067,   | 10489998, | 1925.2716, | 32105,   | 11114582, | 1922.9184, |
| 4.817207 |           |            | 4.811327 |           |            | 4.805446 |           |            |
| 32030,   | 9929566,  | 1927.5629, | 32068,   | 10501512, | 1925.2097, | 32106,   | 11128102, | 1922.8564, |
| 4.817053 |           |            | 4.811172 |           |            | 4.805291 |           |            |
| 32031,   | 9941944,  | 1927.5010, | 32069,   | 10515520, | 1925.1477, | 32107,   | 11144946, | 1922.7945, |
| 4.816898 |           |            | 4.811017 |           |            | 4.805136 |           |            |
| 32032,   | 9959272,  | 1927.4390, | 32070,   | 10534420, | 1925.0858, | 32108,   | 11166870, | 1922.7326, |
| 4.816743 |           |            | 4.810862 |           |            | 4.804982 |           |            |
| 32033,   | 9978430,  | 1927.3771, | 32071,   | 10554738, | 1925.0239, | 32109,   | 11189394, | 1922.6707, |
| 4.816588 |           |            | 4.810708 |           |            | 4.804827 |           |            |
| 32034,   | 9994138,  | 1927.3152, | 32072,   | 10571416, | 1924.9620, | 32110,   | 11207206, | 1922.6087, |
| 4.816434 |           |            | 4.810553 |           |            | 4.804672 |           |            |
| 32035,   | 10005416, | 1927.2533, | 32073,   | 10584060, | 1924.9000, | 32111,   | 11220710, | 1922.5468, |
| 4.816279 |           |            | 4.810398 |           |            | 4.804517 |           |            |
| 32036,   | 10016860, | 1927.1913, | 32074,   | 10597484, | 1924.8381, | 32112,   | 11235750, | 1922.4849, |
| 4.816124 |           |            | 4.810243 |           |            | 4.804363 |           |            |
| 32037,   | 10033210, | 1927.1294, | 32075,   | 10615854, | 1924.7762, | 32113,   | 11256758, | 1922.4230, |
| 4.815969 |           |            | 4.810089 |           |            | 4.804208 |           |            |
| 32038,   | 10053592, | 1927.0675, | 32076,   | 10637496, | 1924.7142, | 32114,   | 11281452, | 1922.3610, |
| 4.815815 |           |            | 4.809934 |           |            | 4.804053 |           |            |
| 32039,   | 10072450, | 1927.0055, | 32077,   | 10656722, | 1924.6523, | 32115,   | 11303490, | 1922.2991, |
| 4.815660 |           |            | 4.809779 |           |            | 4.803898 |           |            |
| 32040,   | 10086102, | 1926.9436, | 32078,   | 10670596, | 1924.5904, | 32116,   | 11319906, | 1922.2372, |
| 4.815505 |           |            | 4.809624 |           |            | 4.803743 |           |            |
| 32041,   | 10097092, | 1926.8817, | 32079,   | 10682538, | 1924.5285, | 32117,   | 11334528, | 1922.1752, |
| 4.815350 |           |            | 4.809470 |           |            | 4.803589 |           |            |
| 32042,   | 10111168, | 1926.8198, | 32080,   | 10698318, | 1924.4665, | 32118,   | 11353252, | 1922.1133, |
| 4.815196 |           |            | 4.809315 |           |            | 4.803434 |           |            |

|          |           |            |          |           |            |          |           |            |
|----------|-----------|------------|----------|-----------|------------|----------|-----------|------------|
| 32119,   | 11376898, | 1922.0514, | 32157,   | 12084226, | 1919.6982, | 32195,   | 12871352, | 1917.3449, |
| 4.803279 |           |            | 4.797398 |           |            | 4.791518 |           |            |
| 32120,   | 11400172, | 1921.9895, | 32158,   | 12108948, | 1919.6362, | 32196,   | 12896098, | 1917.2830, |
| 4.803124 |           |            | 4.797244 |           |            | 4.791363 |           |            |
| 32121,   | 11417998, | 1921.9275, | 32159,   | 12128264, | 1919.5743, | 32197,   | 12914420, | 1917.2211, |
| 4.802970 |           |            | 4.797089 |           |            | 4.791208 |           |            |
| 32122,   | 11431538, | 1921.8656, | 32160,   | 12144174, | 1919.5124, | 32198,   | 12929690, | 1917.1592, |
| 4.802815 |           |            | 4.796934 |           |            | 4.791053 |           |            |
| 32123,   | 11446696, | 1921.8037, | 32161,   | 12162706, | 1919.4505, | 32199,   | 12949042, | 1917.0972, |
| 4.802660 |           |            | 4.796779 |           |            | 4.790899 |           |            |
| 32124,   | 11466964, | 1921.7418, | 32162,   | 12186408, | 1919.3885, | 32200,   | 12974930, | 1917.0353, |
| 4.802505 |           |            | 4.796625 |           |            | 4.790744 |           |            |
| 32125,   | 11489184, | 1921.6798, | 32163,   | 12211000, | 1919.3266, | 32201,   | 13002252, | 1916.9734, |
| 4.802351 |           |            | 4.796470 |           |            | 4.790589 |           |            |
| 32126,   | 11507468, | 1921.6179, | 32164,   | 12230390, | 1919.2647, | 32202,   | 13024510, | 1916.9115, |
| 4.802196 |           |            | 4.796315 |           |            | 4.790434 |           |            |
| 32127,   | 11520450, | 1921.5560, | 32165,   | 12244064, | 1919.2028, | 32203,   | 13041640, | 1916.8495, |
| 4.802041 |           |            | 4.796160 |           |            | 4.790280 |           |            |
| 32128,   | 11533126, | 1921.4940, | 32166,   | 12257982, | 1919.1408, | 32204,   | 13060062, | 1916.7876, |
| 4.801886 |           |            | 4.796006 |           |            | 4.790125 |           |            |
| 32129,   | 11550992, | 1921.4321, | 32167,   | 12277746, | 1919.0789, | 32205,   | 13084894, | 1916.7257, |
| 4.801732 |           |            | 4.795851 |           |            | 4.789970 |           |            |
| 32130,   | 11573428, | 1921.3702, | 32168,   | 12302104, | 1919.0170, | 32206,   | 13113630, | 1916.6638, |
| 4.801577 |           |            | 4.795696 |           |            | 4.789815 |           |            |
| 32131,   | 11594406, | 1921.3083, | 32169,   | 12324572, | 1918.9550, | 32207,   | 13138960, | 1916.6018, |
| 4.801422 |           |            | 4.795541 |           |            | 4.789661 |           |            |
| 32132,   | 11609666, | 1921.2463, | 32170,   | 12341200, | 1918.8931, | 32208,   | 13157380, | 1916.5399, |
| 4.801267 |           |            | 4.795387 |           |            | 4.789506 |           |            |
| 32133,   | 11621836, | 1921.1844, | 32171,   | 12355314, | 1918.8312, | 32209,   | 13173350, | 1916.4780, |
| 4.801113 |           |            | 4.795232 |           |            | 4.789351 |           |            |
| 32134,   | 11637312, | 1921.1225, | 32172,   | 12373466, | 1918.7693, | 32210,   | 13194000, | 1916.4160, |
| 4.800958 |           |            | 4.795077 |           |            | 4.789196 |           |            |
| 32135,   | 11658592, | 1921.0606, | 32173,   | 12397660, | 1918.7073, | 32211,   | 13220724, | 1916.3541, |
| 4.800803 |           |            | 4.794922 |           |            | 4.789042 |           |            |
| 32136,   | 11681264, | 1920.9986, | 32174,   | 12423046, | 1918.6454, | 32212,   | 13247670, | 1916.2922, |
| 4.800648 |           |            | 4.794768 |           |            | 4.788887 |           |            |
| 32137,   | 11699274, | 1920.9367, | 32175,   | 12443904, | 1918.5835, | 32213,   | 13268900, | 1916.2303, |
| 4.800494 |           |            | 4.794613 |           |            | 4.788732 |           |            |
| 32138,   | 11712242, | 1920.8748, | 32176,   | 12460582, | 1918.5216, | 32214,   | 13285568, | 1916.1683, |
| 4.800339 |           |            | 4.794458 |           |            | 4.788577 |           |            |
| 32139,   | 11726030, | 1920.8129, | 32177,   | 12479018, | 1918.4596, | 32215,   | 13304516, | 1916.1064, |
| 4.800184 |           |            | 4.794303 |           |            | 4.788422 |           |            |
| 32140,   | 11745896, | 1920.7509, | 32178,   | 12503406, | 1918.3977, | 32216,   | 13329962, | 1916.0445, |
| 4.800029 |           |            | 4.794149 |           |            | 4.788268 |           |            |
| 32141,   | 11770340, | 1920.6890, | 32179,   | 12530894, | 1918.3358, | 32217,   | 13358410, | 1915.9826, |
| 4.799875 |           |            | 4.793994 |           |            | 4.788113 |           |            |
| 32142,   | 11792976, | 1920.6271, | 32180,   | 12554790, | 1918.2739, | 32218,   | 13382818, | 1915.9206, |
| 4.799720 |           |            | 4.793839 |           |            | 4.787958 |           |            |
| 32143,   | 11810070, | 1920.5651, | 32181,   | 12572476, | 1918.2119, | 32219,   | 13401142, | 1915.8587, |
| 4.799565 |           |            | 4.793684 |           |            | 4.787803 |           |            |
| 32144,   | 11824754, | 1920.5032, | 32182,   | 12588526, | 1918.1500, | 32220,   | 13418850, | 1915.7968, |
| 4.799410 |           |            | 4.793529 |           |            | 4.787649 |           |            |
| 32145,   | 11842874, | 1920.4413, | 32183,   | 12609226, | 1918.0881, | 32221,   | 13442420, | 1915.7348, |
| 4.799256 |           |            | 4.793375 |           |            | 4.787494 |           |            |
| 32146,   | 11865678, | 1920.3794, | 32184,   | 12635074, | 1918.0261, | 32222,   | 13471594, | 1915.6729, |
| 4.799101 |           |            | 4.793220 |           |            | 4.787339 |           |            |
| 32147,   | 11888184, | 1920.3174, | 32185,   | 12660274, | 1917.9642, | 32223,   | 13499730, | 1915.6110, |
| 4.798946 |           |            | 4.793065 |           |            | 4.787184 |           |            |
| 32148,   | 11905290, | 1920.2555, | 32186,   | 12679838, | 1917.9023, | 32224,   | 13521820, | 1915.5491, |
| 4.798791 |           |            | 4.792910 |           |            | 4.787030 |           |            |
| 32149,   | 11918236, | 1920.1936, | 32187,   | 12695732, | 1917.8404, | 32225,   | 13540574, | 1915.4871, |
| 4.798636 |           |            | 4.792756 |           |            | 4.786875 |           |            |
| 32150,   | 11933510, | 1920.1317, | 32188,   | 12714576, | 1917.7784, | 32226,   | 13563166, | 1915.4252, |
| 4.798482 |           |            | 4.792601 |           |            | 4.786720 |           |            |
| 32151,   | 11955418, | 1920.0697, | 32189,   | 12739640, | 1917.7165, | 32227,   | 13592496, | 1915.3633, |
| 4.798327 |           |            | 4.792446 |           |            | 4.786565 |           |            |
| 32152,   | 11981102, | 1920.0078, | 32190,   | 12766770, | 1917.6546, | 32228,   | 13623530, | 1915.3014, |
| 4.798172 |           |            | 4.792291 |           |            | 4.786411 |           |            |
| 32153,   | 12003970, | 1919.9459, | 32191,   | 12789270, | 1917.5927, | 32229,   | 13649092, | 1915.2394, |
| 4.798017 |           |            | 4.792137 |           |            | 4.786256 |           |            |
| 32154,   | 12021440, | 1919.8839, | 32192,   | 12805880, | 1917.5307, | 32230,   | 13668322, | 1915.1775, |
| 4.797863 |           |            | 4.791982 |           |            | 4.786101 |           |            |
| 32155,   | 12037762, | 1919.8220, | 32193,   | 12822342, | 1917.4688, | 32231,   | 13687648, | 1915.1156, |
| 4.797708 |           |            | 4.791827 |           |            | 4.785946 |           |            |
| 32156,   | 12058634, | 1919.7601, | 32194,   | 12844520, | 1917.4069, | 32232,   | 13713208, | 1915.0537, |
| 4.797553 |           |            | 4.791672 |           |            | 4.785792 |           |            |

|          |           |            |          |           |            |          |           |            |
|----------|-----------|------------|----------|-----------|------------|----------|-----------|------------|
| 32233,   | 13743726, | 1914.9917, | 32271,   | 14726032, | 1912.6385, | 32309,   | 15875258, | 1910.2853, |
| 4.785637 |           |            | 4.779756 |           |            | 4.773875 |           |            |
| 32234,   | 13772352, | 1914.9298, | 32272,   | 14757876, | 1912.5766, | 32310,   | 15908910, | 1910.2234, |
| 4.785482 |           |            | 4.779601 |           |            | 4.773720 |           |            |
| 32235,   | 13795082, | 1914.8679, | 32273,   | 14782636, | 1912.5146, | 32311,   | 15935744, | 1910.1614, |
| 4.785327 |           |            | 4.779447 |           |            | 4.773566 |           |            |
| 32236,   | 13815596, | 1914.8059, | 32274,   | 14805632, | 1912.4527, | 32312,   | 15962444, | 1910.0995, |
| 4.785173 |           |            | 4.779292 |           |            | 4.773411 |           |            |
| 32237,   | 13840632, | 1914.7440, | 32275,   | 14834316, | 1912.3908, | 32313,   | 15996616, | 1910.0376, |
| 4.785018 |           |            | 4.779137 |           |            | 4.773256 |           |            |
| 32238,   | 13871662, | 1914.6821, | 32276,   | 14869210, | 1912.3289, | 32314,   | 16037546, | 1909.9756, |
| 4.784863 |           |            | 4.778982 |           |            | 4.773101 |           |            |
| 32239,   | 13902918, | 1914.6202, | 32277,   | 14903110, | 1912.2669, | 32315,   | 16076844, | 1909.9137, |
| 4.784708 |           |            | 4.778828 |           |            | 4.772947 |           |            |
| 32240,   | 13928324, | 1914.5582, | 32278,   | 14929542, | 1912.2050, | 32316,   | 16108308, | 1909.8518, |
| 4.784554 |           |            | 4.778673 |           |            | 4.772792 |           |            |
| 32241,   | 13948890, | 1914.4963, | 32279,   | 14950472, | 1912.1431, | 32317,   | 16135252, | 1909.7899, |
| 4.784399 |           |            | 4.778518 |           |            | 4.772637 |           |            |
| 32242,   | 13971566, | 1914.4344, | 32280,   | 14973978, | 1912.0812, | 32318,   | 16166438, | 1909.7279, |
| 4.784244 |           |            | 4.778363 |           |            | 4.772482 |           |            |
| 32243,   | 14000878, | 1914.3725, | 32281,   | 15004708, | 1912.0192, | 32319,   | 16205470, | 1909.6660, |
| 4.784089 |           |            | 4.778208 |           |            | 4.772328 |           |            |
| 32244,   | 14033338, | 1914.3105, | 32282,   | 15038538, | 1911.9573, | 32320,   | 16246318, | 1909.6041, |
| 4.783935 |           |            | 4.778054 |           |            | 4.772173 |           |            |
| 32245,   | 14061486, | 1914.2486, | 32283,   | 15067818, | 1911.8954, | 32321,   | 16280446, | 1909.5422, |
| 4.783780 |           |            | 4.777899 |           |            | 4.772018 |           |            |
| 32246,   | 14082750, | 1914.1867, | 32284,   | 15090822, | 1911.8335, | 32322,   | 16307020, | 1909.4802, |
| 4.783625 |           |            | 4.777744 |           |            | 4.771863 |           |            |
| 32247,   | 14102536, | 1914.1247, | 32285,   | 15114010, | 1911.7715, | 32323,   | 16333926, | 1909.4183, |
| 4.783470 |           |            | 4.777589 |           |            | 4.771709 |           |            |
| 32248,   | 14127742, | 1914.0628, | 32286,   | 15144308, | 1911.7096, | 32324,   | 16368318, | 1909.3564, |
| 4.783315 |           |            | 4.777435 |           |            | 4.771554 |           |            |
| 32249,   | 14158466, | 1914.0009, | 32287,   | 15180706, | 1911.6477, | 32325,   | 16407958, | 1909.2944, |
| 4.783161 |           |            | 4.777280 |           |            | 4.771399 |           |            |
| 32250,   | 14187876, | 1913.9390, | 32288,   | 15215330, | 1911.5857, | 32326,   | 16443812, | 1909.2325, |
| 4.783006 |           |            | 4.777125 |           |            | 4.771244 |           |            |
| 32251,   | 14210402, | 1913.8770, | 32289,   | 15242722, | 1911.5238, | 32327,   | 16470774, | 1909.1706, |
| 4.782851 |           |            | 4.776970 |           |            | 4.771090 |           |            |
| 32252,   | 14228474, | 1913.8151, | 32290,   | 15266280, | 1911.4619, | 32328,   | 16493774, | 1909.1087, |
| 4.782696 |           |            | 4.776816 |           |            | 4.770935 |           |            |
| 32253,   | 14249638, | 1913.7532, | 32291,   | 15294054, | 1911.4000, | 32329,   | 16521824, | 1909.0467, |
| 4.782542 |           |            | 4.776661 |           |            | 4.770780 |           |            |
| 32254,   | 14277536, | 1913.6913, | 32292,   | 15329068, | 1911.3380, | 32330,   | 16557164, | 1908.9848, |
| 4.782387 |           |            | 4.776506 |           |            | 4.770625 |           |            |
| 32255,   | 14307594, | 1913.6293, | 32293,   | 15365752, | 1911.2761, | 32331,   | 16592494, | 1908.9229, |
| 4.782232 |           |            | 4.776351 |           |            | 4.770471 |           |            |
| 32256,   | 14332572, | 1913.5674, | 32294,   | 15396820, | 1911.2142, | 32332,   | 16619734, | 1908.8610, |
| 4.782077 |           |            | 4.776197 |           |            | 4.770316 |           |            |
| 32257,   | 14351392, | 1913.5055, | 32295,   | 15422270, | 1911.1523, | 32333,   | 16639854, | 1908.7990, |
| 4.781923 |           |            | 4.776042 |           |            | 4.770161 |           |            |
| 32258,   | 14370514, | 1913.4436, | 32296,   | 15449518, | 1911.0903, | 32334,   | 16662058, | 1908.7371, |
| 4.781768 |           |            | 4.775887 |           |            | 4.770006 |           |            |
| 32259,   | 14396250, | 1913.3816, | 32297,   | 15484464, | 1911.0284, | 32335,   | 16693300, | 1908.6752, |
| 4.781613 |           |            | 4.775732 |           |            | 4.769852 |           |            |
| 32260,   | 14427196, | 1913.3197, | 32298,   | 15524192, | 1910.9665, | 32336,   | 16730540, | 1908.6133, |
| 4.781458 |           |            | 4.775578 |           |            | 4.769697 |           |            |
| 32261,   | 14455914, | 1913.2578, | 32299,   | 15560194, | 1910.9045, | 32337,   | 16764924, | 1908.5513, |
| 4.781304 |           |            | 4.775423 |           |            | 4.769542 |           |            |
| 32262,   | 14477922, | 1913.1958, | 32300,   | 15588360, | 1910.8426, | 32338,   | 16792710, | 1908.4894, |
| 4.781149 |           |            | 4.775268 |           |            | 4.769387 |           |            |
| 32263,   | 14497138, | 1913.1339, | 32301,   | 15613796, | 1910.7807, | 32339,   | 16819754, | 1908.4275, |
| 4.780994 |           |            | 4.775113 |           |            | 4.769233 |           |            |
| 32264,   | 14521264, | 1913.0720, | 32302,   | 15644652, | 1910.7188, | 32340,   | 16854290, | 1908.3655, |
| 4.780839 |           |            | 4.774959 |           |            | 4.769078 |           |            |
| 32265,   | 14552574, | 1913.0101, | 32303,   | 15682316, | 1910.6568, | 32341,   | 16896742, | 1908.3036, |
| 4.780685 |           |            | 4.774804 |           |            | 4.768923 |           |            |
| 32266,   | 14585254, | 1912.9481, | 32304,   | 15719798, | 1910.5949, | 32342,   | 16939056, | 1908.2417, |
| 4.780530 |           |            | 4.774649 |           |            | 4.768768 |           |            |
| 32267,   | 14612452, | 1912.8862, | 32305,   | 15750138, | 1910.5330, | 32343,   | 16974286, | 1908.1798, |
| 4.780375 |           |            | 4.774494 |           |            | 4.768613 |           |            |
| 32268,   | 14634578, | 1912.8243, | 32306,   | 15774844, | 1910.4711, | 32344,   | 17004944, | 1908.1178, |
| 4.780220 |           |            | 4.774340 |           |            | 4.768459 |           |            |
| 32269,   | 14658806, | 1912.7624, | 32307,   | 15802096, | 1910.4091, | 32345,   | 17039914, | 1908.0559, |
| 4.780066 |           |            | 4.774185 |           |            | 4.768304 |           |            |
| 32270,   | 14690356, | 1912.7004, | 32308,   | 15836934, | 1910.3472, | 32346,   | 17083638, | 1907.9940, |
| 4.779911 |           |            | 4.774030 |           |            | 4.768149 |           |            |

|          |           |            |          |           |            |          |           |            |
|----------|-----------|------------|----------|-----------|------------|----------|-----------|------------|
| 32347,   | 17130624, | 1907.9321, | 32385,   | 18704580, | 1905.5788, | 32423,   | 20312376, | 1903.2256, |
| 4.767994 |           |            | 4.762114 |           |            | 4.756233 |           |            |
| 32348,   | 17172024, | 1907.8701, | 32386,   | 18741434, | 1905.5169, | 32424,   | 20361420, | 1903.1637, |
| 4.767840 |           |            | 4.761959 |           |            | 4.756078 |           |            |
| 32349,   | 17206408, | 1907.8082, | 32387,   | 18769954, | 1905.4550, | 32425,   | 20403670, | 1903.1018, |
| 4.767685 |           |            | 4.761804 |           |            | 4.755923 |           |            |
| 32350,   | 17241746, | 1907.7463, | 32388,   | 18799688, | 1905.3931, | 32426,   | 20448916, | 1903.0398, |
| 4.767530 |           |            | 4.761649 |           |            | 4.755769 |           |            |
| 32351,   | 17286040, | 1907.6843, | 32389,   | 18838816, | 1905.3311, | 32427,   | 20503998, | 1902.9779, |
| 4.767375 |           |            | 4.761495 |           |            | 4.755614 |           |            |
| 32352,   | 17337766, | 1907.6224, | 32390,   | 18884696, | 1905.2692, | 32428,   | 20563906, | 1902.9160, |
| 4.767221 |           |            | 4.761340 |           |            | 4.755459 |           |            |
| 32353,   | 17387546, | 1907.5605, | 32391,   | 18927498, | 1905.2073, | 32429,   | 20617000, | 1902.8541, |
| 4.767066 |           |            | 4.761185 |           |            | 4.755304 |           |            |
| 32354,   | 17429214, | 1907.4986, | 32392,   | 18962580, | 1905.1453, | 32430,   | 20658236, | 1902.7921, |
| 4.766911 |           |            | 4.761030 |           |            | 4.755150 |           |            |
| 32355,   | 17466996, | 1907.4366, | 32393,   | 18996656, | 1905.0834, | 32431,   | 20694564, | 1902.7302, |
| 4.766756 |           |            | 4.760876 |           |            | 4.754995 |           |            |
| 32356,   | 17510320, | 1907.3747, | 32394,   | 19040178, | 1905.0215, | 32432,   | 20736218, | 1902.6683, |
| 4.766602 |           |            | 4.760721 |           |            | 4.754840 |           |            |
| 32357,   | 17562442, | 1907.3128, | 32395,   | 19094860, | 1904.9596, | 32433,   | 20784592, | 1902.6063, |
| 4.766447 |           |            | 4.760566 |           |            | 4.754685 |           |            |
| 32358,   | 17616526, | 1907.2509, | 32396,   | 19151288, | 1904.8976, | 32434,   | 20831390, | 1902.5444, |
| 4.766292 |           |            | 4.760411 |           |            | 4.754531 |           |            |
| 32359,   | 17663804, | 1907.1889, | 32397,   | 19199542, | 1904.8357, | 32435,   | 20870038, | 1902.4825, |
| 4.766137 |           |            | 4.760257 |           |            | 4.754376 |           |            |
| 32360,   | 17703924, | 1907.1270, | 32398,   | 19240320, | 1904.7738, | 32436,   | 20905190, | 1902.4206, |
| 4.765983 |           |            | 4.760102 |           |            | 4.754221 |           |            |
| 32361,   | 17745060, | 1907.0651, | 32399,   | 19283316, | 1904.7119, | 32437,   | 20948224, | 1902.3586, |
| 4.765828 |           |            | 4.759947 |           |            | 4.754066 |           |            |
| 32362,   | 17793676, | 1907.0032, | 32400,   | 19334922, | 1904.6499, | 32438,   | 21003546, | 1902.2967, |
| 4.765673 |           |            | 4.759792 |           |            | 4.753912 |           |            |
| 32363,   | 17846434, | 1906.9412, | 32401,   | 19390084, | 1904.5880, | 32439,   | 21062038, | 1902.2348, |
| 4.765518 |           |            | 4.759638 |           |            | 4.753757 |           |            |
| 32364,   | 17894056, | 1906.8793, | 32402,   | 19438122, | 1904.5261, | 32440,   | 21109962, | 1902.1729, |
| 4.765364 |           |            | 4.759483 |           |            | 4.753602 |           |            |
| 32365,   | 17932554, | 1906.8174, | 32403,   | 19475530, | 1904.4642, | 32441,   | 21143452, | 1902.1109, |
| 4.765209 |           |            | 4.759328 |           |            | 4.753447 |           |            |
| 32366,   | 17968182, | 1906.7554, | 32404,   | 19510370, | 1904.4022, | 32442,   | 21172156, | 1902.0490, |
| 4.765054 |           |            | 4.759173 |           |            | 4.753292 |           |            |
| 32367,   | 18010040, | 1906.6935, | 32405,   | 19552850, | 1904.3403, | 32443,   | 21208144, | 1901.9871, |
| 4.764899 |           |            | 4.759019 |           |            | 4.753138 |           |            |
| 32368,   | 18059072, | 1906.6316, | 32406,   | 19603306, | 1904.2784, | 32444,   | 21253350, | 1901.9251, |
| 4.764745 |           |            | 4.758864 |           |            | 4.752983 |           |            |
| 32369,   | 18106728, | 1906.5697, | 32407,   | 19651928, | 1904.2164, | 32445,   | 21299856, | 1901.8632, |
| 4.764590 |           |            | 4.758709 |           |            | 4.752828 |           |            |
| 32370,   | 18145016, | 1906.5077, | 32408,   | 19690600, | 1904.1545, | 32446,   | 21341650, | 1901.8013, |
| 4.764435 |           |            | 4.758554 |           |            | 4.752673 |           |            |
| 32371,   | 18175928, | 1906.4458, | 32409,   | 19722572, | 1904.0926, | 32447,   | 21382826, | 1901.7394, |
| 4.764280 |           |            | 4.758399 |           |            | 4.752519 |           |            |
| 32372,   | 18209018, | 1906.3839, | 32410,   | 19758498, | 1904.0307, | 32448,   | 21432102, | 1901.6774, |
| 4.764126 |           |            | 4.758245 |           |            | 4.752364 |           |            |
| 32373,   | 18250006, | 1906.3220, | 32411,   | 19803546, | 1903.9687, | 32449,   | 21490642, | 1901.6155, |
| 4.763971 |           |            | 4.758090 |           |            | 4.752209 |           |            |
| 32374,   | 18294174, | 1906.2600, | 32412,   | 19851180, | 1903.9068, | 32450,   | 21548436, | 1901.5536, |
| 4.763816 |           |            | 4.757935 |           |            | 4.752054 |           |            |
| 32375,   | 18332436, | 1906.1981, | 32413,   | 19891058, | 1903.8449, | 32451,   | 21594110, | 1901.4917, |
| 4.763661 |           |            | 4.757780 |           |            | 4.751900 |           |            |
| 32376,   | 18362702, | 1906.1362, | 32414,   | 19921594, | 1903.7830, | 32452,   | 21626650, | 1901.4297, |
| 4.763506 |           |            | 4.757626 |           |            | 4.751745 |           |            |
| 32377,   | 18392722, | 1906.0743, | 32415,   | 19952122, | 1903.7210, | 32453,   | 21655244, | 1901.3678, |
| 4.763352 |           |            | 4.757471 |           |            | 4.751590 |           |            |
| 32378,   | 18430872, | 1906.0123, | 32416,   | 19992012, | 1903.6591, | 32454,   | 21687994, | 1901.3059, |
| 4.763197 |           |            | 4.757316 |           |            | 4.751435 |           |            |
| 32379,   | 18475990, | 1905.9504, | 32417,   | 20039898, | 1903.5972, | 32455,   | 21723604, | 1901.2440, |
| 4.763042 |           |            | 4.757161 |           |            | 4.751281 |           |            |
| 32380,   | 18518632, | 1905.8885, | 32418,   | 20085828, | 1903.5352, | 32456,   | 21756000, | 1901.1820, |
| 4.762887 |           |            | 4.757007 |           |            | 4.751126 |           |            |
| 32381,   | 18552368, | 1905.8265, | 32419,   | 20123724, | 1903.4733, | 32457,   | 21785172, | 1901.1201, |
| 4.762733 |           |            | 4.756852 |           |            | 4.750971 |           |            |
| 32382,   | 18581564, | 1905.7646, | 32420,   | 20159002, | 1903.4114, | 32458,   | 21819270, | 1901.0582, |
| 4.762578 |           |            | 4.756697 |           |            | 4.750816 |           |            |
| 32383,   | 18616168, | 1905.7027, | 32421,   | 20202158, | 1903.3495, | 32459,   | 21863988, | 1900.9962, |
| 4.762423 |           |            | 4.756542 |           |            | 4.750662 |           |            |
| 32384,   | 18659638, | 1905.6408, | 32422,   | 20256064, | 1903.2875, | 32460,   | 21912062, | 1900.9343, |
| 4.762268 |           |            | 4.756388 |           |            | 4.750507 |           |            |



|          |           |            |          |           |            |          |           |            |
|----------|-----------|------------|----------|-----------|------------|----------|-----------|------------|
| 32461,   | 21947328, | 1900.8724, | 32499,   | 23819908, | 1898.5192, | 32537,   | 25497766, | 1896.1659, |
| 4.750352 |           |            | 4.744471 |           |            | 4.738591 |           |            |
| 32462,   | 21960846, | 1900.8105, | 32500,   | 23881174, | 1898.4572, | 32538,   | 25518656, | 1896.1040, |
| 4.750197 |           |            | 4.744317 |           |            | 4.738436 |           |            |
| 32463,   | 21961210, | 1900.7485, | 32501,   | 23932766, | 1898.3953, | 32539,   | 25532320, | 1896.0421, |
| 4.750043 |           |            | 4.744162 |           |            | 4.738281 |           |            |
| 32464,   | 21966444, | 1900.6866, | 32502,   | 23990150, | 1898.3334, | 32540,   | 25555916, | 1895.9802, |
| 4.749888 |           |            | 4.744007 |           |            | 4.738126 |           |            |
| 32465,   | 21985674, | 1900.6247, | 32503,   | 24060218, | 1898.2715, | 32541,   | 25595058, | 1895.9182, |
| 4.749733 |           |            | 4.743852 |           |            | 4.737971 |           |            |
| 32466,   | 22011226, | 1900.5628, | 32504,   | 24132716, | 1898.2095, | 32542,   | 25636236, | 1895.8563, |
| 4.749578 |           |            | 4.743698 |           |            | 4.737817 |           |            |
| 32467,   | 22030014, | 1900.5008, | 32505,   | 24192124, | 1898.1476, | 32543,   | 25662242, | 1895.7944, |
| 4.749424 |           |            | 4.743543 |           |            | 4.737662 |           |            |
| 32468,   | 22040930, | 1900.4389, | 32506,   | 24236034, | 1898.0857, | 32544,   | 25672338, | 1895.7325, |
| 4.749269 |           |            | 4.743388 |           |            | 4.737507 |           |            |
| 32469,   | 22057824, | 1900.3770, | 32507,   | 24277996, | 1898.0238, | 32545,   | 25682980, | 1895.6705, |
| 4.749114 |           |            | 4.743233 |           |            | 4.737352 |           |            |
| 32470,   | 22094632, | 1900.3150, | 32508,   | 24331354, | 1897.9618, | 32546,   | 25708120, | 1895.6086, |
| 4.748959 |           |            | 4.743078 |           |            | 4.737198 |           |            |
| 32471,   | 22150012, | 1900.2531, | 32509,   | 24393310, | 1897.8999, | 32547,   | 25742560, | 1895.5467, |
| 4.748805 |           |            | 4.742924 |           |            | 4.737043 |           |            |
| 32472,   | 22209480, | 1900.1912, | 32510,   | 24448448, | 1897.8380, | 32548,   | 25768400, | 1895.4847, |
| 4.748650 |           |            | 4.742769 |           |            | 4.736888 |           |            |
| 32473,   | 22262154, | 1900.1293, | 32511,   | 24487686, | 1897.7760, | 32549,   | 25776832, | 1895.4228, |
| 4.748495 |           |            | 4.742614 |           |            | 4.736733 |           |            |
| 32474,   | 22312194, | 1900.0673, | 32512,   | 24520024, | 1897.7141, | 32550,   | 25778932, | 1895.3609, |
| 4.748340 |           |            | 4.742459 |           |            | 4.736579 |           |            |
| 32475,   | 22371562, | 1900.0054, | 32513,   | 24562854, | 1897.6522, | 32551,   | 25792188, | 1895.2990, |
| 4.748185 |           |            | 4.742305 |           |            | 4.736424 |           |            |
| 32476,   | 22443406, | 1899.9435, | 32514,   | 24622132, | 1897.5903, | 32552,   | 25819050, | 1895.2370, |
| 4.748031 |           |            | 4.742150 |           |            | 4.736269 |           |            |
| 32477,   | 22516508, | 1899.8816, | 32515,   | 24685786, | 1897.5283, | 32553,   | 25843664, | 1895.1751, |
| 4.747876 |           |            | 4.741995 |           |            | 4.736114 |           |            |
| 32478,   | 22577808, | 1899.8196, | 32516,   | 24738106, | 1897.4664, | 32554,   | 25851488, | 1895.1132, |
| 4.747721 |           |            | 4.741840 |           |            | 4.735960 |           |            |
| 32479,   | 22627780, | 1899.7577, | 32517,   | 24777772, | 1897.4045, | 32555,   | 25848546, | 1895.0513, |
| 4.747566 |           |            | 4.741686 |           |            | 4.735805 |           |            |
| 32480,   | 22679702, | 1899.6958, | 32518,   | 24818182, | 1897.3426, | 32556,   | 25856878, | 1894.9893, |
| 4.747412 |           |            | 4.741531 |           |            | 4.735650 |           |            |
| 32481,   | 22743086, | 1899.6339, | 32519,   | 24870152, | 1897.2806, | 32557,   | 25890702, | 1894.9274, |
| 4.747257 |           |            | 4.741376 |           |            | 4.735495 |           |            |
| 32482,   | 22811094, | 1899.5719, | 32520,   | 24928158, | 1897.2187, | 32558,   | 25941104, | 1894.8655, |
| 4.747102 |           |            | 4.741221 |           |            | 4.735341 |           |            |
| 32483,   | 22867666, | 1899.5100, | 32521,   | 24976932, | 1897.1568, | 32559,   | 25987376, | 1894.8036, |
| 4.746947 |           |            | 4.741067 |           |            | 4.735186 |           |            |
| 32484,   | 22906646, | 1899.4481, | 32522,   | 25010276, | 1897.0948, | 32560,   | 26021720, | 1894.7416, |
| 4.746793 |           |            | 4.740912 |           |            | 4.735031 |           |            |
| 32485,   | 22940418, | 1899.3861, | 32523,   | 25039074, | 1897.0329, | 32561,   | 26058164, | 1894.6797, |
| 4.746638 |           |            | 4.740757 |           |            | 4.734876 |           |            |
| 32486,   | 22987232, | 1899.3242, | 32524,   | 25078368, | 1896.9710, | 32562,   | 26115196, | 1894.6178, |
| 4.746483 |           |            | 4.740602 |           |            | 4.734722 |           |            |
| 32487,   | 23051328, | 1899.2623, | 32525,   | 25128954, | 1896.9091, | 32563,   | 26192700, | 1894.5558, |
| 4.746328 |           |            | 4.740448 |           |            | 4.734567 |           |            |
| 32488,   | 23118752, | 1899.2004, | 32526,   | 25175856, | 1896.8471, | 32564,   | 26270434, | 1894.4939, |
| 4.746174 |           |            | 4.740293 |           |            | 4.734412 |           |            |
| 32489,   | 23173674, | 1899.1384, | 32527,   | 25205994, | 1896.7852, | 32565,   | 26329550, | 1894.4320, |
| 4.746019 |           |            | 4.740138 |           |            | 4.734257 |           |            |
| 32490,   | 23216346, | 1899.0765, | 32528,   | 25224064, | 1896.7233, | 32566,   | 26371416, | 1894.3701, |
| 4.745864 |           |            | 4.739983 |           |            | 4.734103 |           |            |
| 32491,   | 23262180, | 1899.0146, | 32529,   | 25247414, | 1896.6614, | 32567,   | 26411760, | 1894.3081, |
| 4.745709 |           |            | 4.739829 |           |            | 4.733948 |           |            |
| 32492,   | 23323724, | 1898.9527, | 32530,   | 25285726, | 1896.5994, | 32568,   | 26458192, | 1894.2462, |
| 4.745555 |           |            | 4.739674 |           |            | 4.733793 |           |            |
| 32493,   | 23397032, | 1898.8907, | 32531,   | 25329706, | 1896.5375, | 32569,   | 26499148, | 1894.1843, |
| 4.745400 |           |            | 4.739519 |           |            | 4.733638 |           |            |
| 32494,   | 23467944, | 1898.8288, | 32532,   | 25362320, | 1896.4756, | 32570,   | 26518140, | 1894.1224, |
| 4.745245 |           |            | 4.739364 |           |            | 4.733484 |           |            |
| 32495,   | 23529794, | 1898.7669, | 32533,   | 25379260, | 1896.4137, | 32571,   | 26516022, | 1894.0604, |
| 4.745090 |           |            | 4.739210 |           |            | 4.733329 |           |            |
| 32496,   | 23590794, | 1898.7049, | 32534,   | 25394116, | 1896.3517, | 32572,   | 26513540, | 1893.9985, |
| 4.744936 |           |            | 4.739055 |           |            | 4.733174 |           |            |
| 32497,   | 23662384, | 1898.6430, | 32535,   | 25422104, | 1896.2898, | 32573,   | 26529814, | 1893.9366, |
| 4.744781 |           |            | 4.738900 |           |            | 4.733019 |           |            |
| 32498,   | 23743418, | 1898.5811, | 32536,   | 25461954, | 1896.2279, | 32574,   | 26561528, | 1893.8746, |
| 4.744626 |           |            | 4.738745 |           |            | 4.732864 |           |            |

|          |           |            |          |           |            |          |           |            |
|----------|-----------|------------|----------|-----------|------------|----------|-----------|------------|
| 32575,   | 26587544, | 1893.8127, | 32613,   | 28626424, | 1891.4595, | 32651,   | 33233098, | 1889.1063, |
| 4.732710 |           |            | 4.726829 |           |            | 4.720948 |           |            |
| 32576,   | 26593688, | 1893.7508, | 32614,   | 28679442, | 1891.3976, | 32652,   | 33410824, | 1889.0444, |
| 4.732555 |           |            | 4.726674 |           |            | 4.720793 |           |            |
| 32577,   | 26588670, | 1893.6889, | 32615,   | 28729288, | 1891.3356, | 32653,   | 33586218, | 1888.9824, |
| 4.732400 |           |            | 4.726519 |           |            | 4.720639 |           |            |
| 32578,   | 26592768, | 1893.6269, | 32616,   | 28798562, | 1891.2737, | 32654,   | 33787424, | 1888.9205, |
| 4.732245 |           |            | 4.726365 |           |            | 4.720484 |           |            |
| 32579,   | 26613440, | 1893.5650, | 32617,   | 28889150, | 1891.2118, | 32655,   | 34013652, | 1888.8586, |
| 4.732091 |           |            | 4.726210 |           |            | 4.720329 |           |            |
| 32580,   | 26637614, | 1893.5031, | 32618,   | 28978860, | 1891.1499, | 32656,   | 34234734, | 1888.7966, |
| 4.731936 |           |            | 4.726055 |           |            | 4.720174 |           |            |
| 32581,   | 26649946, | 1893.4412, | 32619,   | 29047560, | 1891.0879, | 32657,   | 34426810, | 1888.7347, |
| 4.731781 |           |            | 4.725900 |           |            | 4.720020 |           |            |
| 32582,   | 26654928, | 1893.3792, | 32620,   | 29102050, | 1891.0260, | 32658,   | 34601446, | 1888.6728, |
| 4.731626 |           |            | 4.725746 |           |            | 4.719865 |           |            |
| 32583,   | 26675720, | 1893.3173, | 32621,   | 29169518, | 1890.9641, | 32659,   | 34792708, | 1888.6109, |
| 4.731472 |           |            | 4.725591 |           |            | 4.719710 |           |            |
| 32584,   | 26730480, | 1893.2554, | 32622,   | 29266694, | 1890.9022, | 32660,   | 35017070, | 1888.5489, |
| 4.731317 |           |            | 4.725436 |           |            | 4.719555 |           |            |
| 32585,   | 26813988, | 1893.1935, | 32623,   | 29381096, | 1890.8402, | 32661,   | 35254324, | 1888.4870, |
| 4.731162 |           |            | 4.725281 |           |            | 4.719401 |           |            |
| 32586,   | 26905888, | 1893.1315, | 32624,   | 29486698, | 1890.7783, | 32662,   | 35473038, | 1888.4251, |
| 4.731007 |           |            | 4.725127 |           |            | 4.719246 |           |            |
| 32587,   | 26994830, | 1893.0696, | 32625,   | 29575152, | 1890.7164, | 32663,   | 35670324, | 1888.3632, |
| 4.730853 |           |            | 4.724972 |           |            | 4.719091 |           |            |
| 32588,   | 27088754, | 1893.0077, | 32626,   | 29665100, | 1890.6545, | 32664,   | 35877742, | 1888.3012, |
| 4.730698 |           |            | 4.724817 |           |            | 4.718936 |           |            |
| 32589,   | 27198870, | 1892.9457, | 32627,   | 29778260, | 1890.5925, | 32665,   | 36125206, | 1888.2393, |
| 4.730543 |           |            | 4.724662 |           |            | 4.718782 |           |            |
| 32590,   | 27317654, | 1892.8838, | 32628,   | 29911366, | 1890.5306, | 32666,   | 36405566, | 1888.1774, |
| 4.730388 |           |            | 4.724508 |           |            | 4.718627 |           |            |
| 32591,   | 27419274, | 1892.8219, | 32629,   | 30038388, | 1890.4687, | 32667,   | 36682534, | 1888.1154, |
| 4.730234 |           |            | 4.724353 |           |            | 4.718472 |           |            |
| 32592,   | 27484102, | 1892.7600, | 32630,   | 30141100, | 1890.4067, | 32668,   | 36932866, | 1888.0535, |
| 4.730079 |           |            | 4.724198 |           |            | 4.718317 |           |            |
| 32593,   | 27519080, | 1892.6980, | 32631,   | 30231400, | 1890.3448, | 32669,   | 37172300, | 1887.9916, |
| 4.729924 |           |            | 4.724043 |           |            | 4.718162 |           |            |
| 32594,   | 27549442, | 1892.6361, | 32632,   | 30338082, | 1890.2829, | 32670,   | 37433724, | 1887.9297, |
| 4.729769 |           |            | 4.723889 |           |            | 4.718008 |           |            |
| 32595,   | 27590884, | 1892.5742, | 32633,   | 30473234, | 1890.2210, | 32671,   | 37723750, | 1887.8677, |
| 4.729615 |           |            | 4.723734 |           |            | 4.717853 |           |            |
| 32596,   | 27634802, | 1892.5123, | 32634,   | 30618342, | 1890.1590, | 32672,   | 38010602, | 1887.8058, |
| 4.729460 |           |            | 4.723579 |           |            | 4.717698 |           |            |
| 32597,   | 27663866, | 1892.4503, | 32635,   | 30747060, | 1890.0971, | 32673,   | 38259078, | 1887.7439, |
| 4.729305 |           |            | 4.723424 |           |            | 4.717543 |           |            |
| 32598,   | 27678920, | 1892.3884, | 32636,   | 30857442, | 1890.0352, | 32674,   | 38471168, | 1887.6820, |
| 4.729150 |           |            | 4.723269 |           |            | 4.717389 |           |            |
| 32599,   | 27704078, | 1892.3265, | 32637,   | 30974750, | 1889.9733, | 32675,   | 38682956, | 1887.6200, |
| 4.728996 |           |            | 4.723115 |           |            | 4.717234 |           |            |
| 32600,   | 27762564, | 1892.2646, | 32638,   | 31120860, | 1889.9113, | 32676,   | 38920412, | 1887.5581, |
| 4.728841 |           |            | 4.722960 |           |            | 4.717079 |           |            |
| 32601,   | 27850858, | 1892.2026, | 32639,   | 31286866, | 1889.8494, | 32677,   | 39166708, | 1887.4962, |
| 4.728686 |           |            | 4.722805 |           |            | 4.716924 |           |            |
| 32602,   | 27941588, | 1892.1407, | 32640,   | 31442166, | 1889.7875, | 32678,   | 39380932, | 1887.4343, |
| 4.728531 |           |            | 4.722650 |           |            | 4.716770 |           |            |
| 32603,   | 28012210, | 1892.0788, | 32641,   | 31569944, | 1889.7255, | 32679,   | 39546714, | 1887.3723, |
| 4.728376 |           |            | 4.722496 |           |            | 4.716615 |           |            |
| 32604,   | 28066568, | 1892.0168, | 32642,   | 31686996, | 1889.6636, | 32680,   | 39692500, | 1887.3104, |
| 4.728222 |           |            | 4.722341 |           |            | 4.716460 |           |            |
| 32605,   | 28125310, | 1891.9549, | 32643,   | 31824120, | 1889.6017, | 32681,   | 39858544, | 1887.2485, |
| 4.728067 |           |            | 4.722186 |           |            | 4.716305 |           |            |
| 32606,   | 28198130, | 1891.8930, | 32644,   | 31990402, | 1889.5398, | 32682,   | 40049598, | 1887.1865, |
| 4.727912 |           |            | 4.722031 |           |            | 4.716151 |           |            |
| 32607,   | 28271750, | 1891.8311, | 32645,   | 32164030, | 1889.4778, | 32683,   | 40230438, | 1887.1246, |
| 4.727757 |           |            | 4.721877 |           |            | 4.715996 |           |            |
| 32608,   | 28327540, | 1891.7691, | 32646,   | 32320508, | 1889.4159, | 32684,   | 40370316, | 1887.0627, |
| 4.727603 |           |            | 4.721722 |           |            | 4.715841 |           |            |
| 32609,   | 28366416, | 1891.7072, | 32647,   | 32463948, | 1889.3540, | 32685,   | 40483308, | 1887.0008, |
| 4.727448 |           |            | 4.721567 |           |            | 4.715686 |           |            |
| 32610,   | 28409836, | 1891.6453, | 32648,   | 32623242, | 1889.2921, | 32686,   | 40615388, | 1886.9388, |
| 4.727293 |           |            | 4.721412 |           |            | 4.715532 |           |            |
| 32611,   | 28475096, | 1891.5834, | 32649,   | 32817312, | 1889.2301, | 32687,   | 40792790, | 1886.8769, |
| 4.727138 |           |            | 4.721258 |           |            | 4.715377 |           |            |
| 32612,   | 28554894, | 1891.5214, | 32650,   | 33031300, | 1889.1682, | 32688,   | 40993458, | 1886.8150, |
| 4.726984 |           |            | 4.721103 |           |            | 4.715222 |           |            |

|          |           |            |          |             |            |          |             |            |
|----------|-----------|------------|----------|-------------|------------|----------|-------------|------------|
| 32689,   | 41176310, | 1886.7531, | 32727,   | 58346286,   | 1884.3998, | 32765,   | -367487274, | 1882.0466, |
| 4.715067 |           |            | 4.709187 |             |            | 4.703306 |             |            |
| 32690,   | 41333320, | 1886.6911, | 32728,   | 58961424,   | 1884.3379, | 32766,   | -400268968, | 1881.9847, |
| 4.714913 |           |            | 4.709032 |             |            | 4.703151 |             |            |
| 32691,   | 41501086, | 1886.6292, | 32729,   | 59542228,   | 1884.2760, | 32767,   | -426205196, | 1881.9228, |
| 4.714758 |           |            | 4.708877 |             |            | 4.702996 |             |            |
| 32692,   | 41716584, | 1886.5673, | 32730,   | 60139376,   | 1884.2141, | 32768,   | -442566292, | 1881.8608, |
| 4.714603 |           |            | 4.708722 |             |            | 4.702841 |             |            |
| 32693,   | 41970114, | 1886.5053, | 32731,   | 60713152,   | 1884.1521, | 32769,   | -447495332, | 1881.7989, |
| 4.714448 |           |            | 4.708568 |             |            | 4.702687 |             |            |
| 32694,   | 42213224, | 1886.4434, | 32732,   | 61161232,   | 1884.0902, | 32770,   | -439621022, | 1881.7370, |
| 4.714294 |           |            | 4.708413 |             |            | 4.702532 |             |            |
| 32695,   | 42413974, | 1886.3815, | 32733,   | 61422882,   | 1884.0283, | 32771,   | -416780548, | 1881.6750, |
| 4.714139 |           |            | 4.708258 |             |            | 4.702377 |             |            |
| 32696,   | 42593872, | 1886.3196, | 32734,   | 61533534,   | 1883.9663, | 32772,   | -375112450, | 1881.6131, |
| 4.713984 |           |            | 4.708103 |             |            | 4.702222 |             |            |
| 32697,   | 42801170, | 1886.2576, | 32735,   | 61558536,   | 1883.9044, | 32773,   | -309913268, | 1881.5512, |
| 4.713829 |           |            | 4.707948 |             |            | 4.702068 |             |            |
| 32698,   | 43051598, | 1886.1957, | 32736,   | 61480198,   | 1883.8425, | 32774,   | -218400564, | 1881.4893, |
| 4.713675 |           |            | 4.707794 |             |            | 4.701913 |             |            |
| 32699,   | 43307990, | 1886.1338, | 32737,   | 61174114,   | 1883.7806, | 32775,   | -102825540, | 1881.4273, |
| 4.713520 |           |            | 4.707639 |             |            | 4.701758 |             |            |
| 32700,   | 43524942, | 1886.0719, | 32738,   | 60508644,   | 1883.7186, | 32776,   | 28273332,   | 1881.3654, |
| 4.713365 |           |            | 4.707484 |             |            | 4.701603 |             |            |
| 32701,   | 43706078, | 1886.0099, | 32739,   | 59452786,   | 1883.6567, | 32777,   | 161813524,  | 1881.3035, |
| 4.713210 |           |            | 4.707329 |             |            | 4.701449 |             |            |
| 32702,   | 43904736, | 1885.9480, | 32740,   | 58062512,   | 1883.5948, | 32778,   | 284059284,  | 1881.2416, |
| 4.713055 |           |            | 4.707175 |             |            | 4.701294 |             |            |
| 32703,   | 44165676, | 1885.8861, | 32741,   | 56359044,   | 1883.5329, | 32779,   | 384486042,  | 1881.1796, |
| 4.712901 |           |            | 4.707020 |             |            | 4.701139 |             |            |
| 32704,   | 44476892, | 1885.8242, | 32742,   | 54245742,   | 1883.4709, | 32780,   | 457733644,  | 1881.1177, |
| 4.712746 |           |            | 4.706865 |             |            | 4.700984 |             |            |
| 32705,   | 44789754, | 1885.7622, | 32743,   | 51568428,   | 1883.4090, | 32781,   | 503235392,  | 1881.0558, |
| 4.712591 |           |            | 4.706710 |             |            | 4.700830 |             |            |
| 32706,   | 45083862, | 1885.7003, | 32744,   | 48249696,   | 1883.3471, | 32782,   | 523483540,  | 1880.9939, |
| 4.712436 |           |            | 4.706556 |             |            | 4.700675 |             |            |
| 32707,   | 45397904, | 1885.6384, | 32745,   | 44329620,   | 1883.2851, | 32783,   | 522235466,  | 1880.9319, |
| 4.712282 |           |            | 4.706401 |             |            | 4.700520 |             |            |
| 32708,   | 45787468, | 1885.5764, | 32746,   | 39850434,   | 1883.2232, | 32784,   | 503385966,  | 1880.8700, |
| 4.712127 |           |            | 4.706246 |             |            | 4.700365 |             |            |
| 32709,   | 46259380, | 1885.5145, | 32747,   | 34713096,   | 1883.1613, | 32785,   | 470510954,  | 1880.8081, |
| 4.711972 |           |            | 4.706091 |             |            | 4.700211 |             |            |
| 32710,   | 46762510, | 1885.4526, | 32748,   | 28678384,   | 1883.0994, | 32786,   | 426807256,  | 1880.7461, |
| 4.711817 |           |            | 4.705937 |             |            | 4.700056 |             |            |
| 32711,   | 47248606, | 1885.3907, | 32749,   | 21517980,   | 1883.0374, | 32787,   | 375250206,  | 1880.6842, |
| 4.711663 |           |            | 4.705782 |             |            | 4.699901 |             |            |
| 32712,   | 47731418, | 1885.3287, | 32750,   | 13134780,   | 1882.9755, | 32788,   | 318874106,  | 1880.6223, |
| 4.711508 |           |            | 4.705627 |             |            | 4.699746 |             |            |
| 32713,   | 48271788, | 1885.2668, | 32751,   | 3497088,    | 1882.9136, | 32789,   | 260990650,  | 1880.5604, |
| 4.711353 |           |            | 4.705472 |             |            | 4.699592 |             |            |
| 32714,   | 48904376, | 1885.2049, | 32752,   | -7546996,   | 1882.8517, | 32790,   | 205104302,  | 1880.4984, |
| 4.711198 |           |            | 4.705318 |             |            | 4.699437 |             |            |
| 32715,   | 49593304, | 1885.1430, | 32753,   | -20351808,  | 1882.7897, | 32791,   | 154472102,  | 1880.4365, |
| 4.711044 |           |            | 4.705163 |             |            | 4.699282 |             |            |
| 32716,   | 50271428, | 1885.0810, | 32754,   | -35339066,  | 1882.7278, | 32792,   | 111564510,  | 1880.3746, |
| 4.710889 |           |            | 4.705008 |             |            | 4.699127 |             |            |
| 32717,   | 50917874, | 1885.0191, | 32755,   | -52791752,  | 1882.6659, | 32793,   | 77778006,   | 1880.3127, |
| 4.710734 |           |            | 4.704853 |             |            | 4.698973 |             |            |
| 32718,   | 51580418, | 1884.9572, | 32756,   | -72820596,  | 1882.6040, | 32794,   | 53502942,   | 1880.2507, |
| 4.710579 |           |            | 4.704699 |             |            | 4.698818 |             |            |
| 32719,   | 52313912, | 1884.8952, | 32757,   | -95542046,  | 1882.5420, | 32795,   | 38327186,   | 1880.1888, |
| 4.710425 |           |            | 4.704544 |             |            | 4.698663 |             |            |
| 32720,   | 53108010, | 1884.8333, | 32758,   | -121228878, | 1882.4801, | 32796,   | 31120622,   | 1880.1269, |
| 4.710270 |           |            | 4.704389 |             |            | 4.698508 |             |            |
| 32721,   | 53892672, | 1884.7714, | 32759,   | -150189750, | 1882.4182, | 32797,   | 30027500,   | 1880.0650, |
| 4.710115 |           |            | 4.704234 |             |            | 4.698354 |             |            |
| 32722,   | 54617766, | 1884.7095, | 32760,   | -182442274, | 1882.3562, | 32798,   | 32641640,   | 1880.0030, |
| 4.709960 |           |            | 4.704080 |             |            | 4.698199 |             |            |
| 32723,   | 55311470, | 1884.6475, | 32761,   | -217511792, | 1882.2943, | 32799,   | 36528496,   | 1879.9411, |
| 4.709806 |           |            | 4.703925 |             |            | 4.698044 |             |            |
| 32724,   | 56044454, | 1884.5856, | 32762,   | -254565758, | 1882.2324, | 32800,   | 39877512,   | 1879.8792, |
| 4.709651 |           |            | 4.703770 |             |            | 4.697889 |             |            |
| 32725,   | 56839436, | 1884.5237, | 32763,   | -292681272, | 1882.1705, | 32801,   | 41842900,   | 1879.8172, |
| 4.709496 |           |            | 4.703615 |             |            | 4.697734 |             |            |
| 32726,   | 57634372, | 1884.4618, | 32764,   | -330831582, | 1882.1085, | 32802,   | 42341610,   | 1879.7553, |
| 4.709341 |           |            | 4.703461 |             |            | 4.697580 |             |            |

|          |            |            |          |            |            |          |           |            |
|----------|------------|------------|----------|------------|------------|----------|-----------|------------|
| 32803,   | 41535284,  | 1879.6934, | 32841,   | -27846882, | 1877.3402, | 32879,   | -8930902, | 1874.9869, |
| 4.697425 |            |            | 4.691544 |            |            | 4.685663 |           |            |
| 32804,   | 39462256,  | 1879.6315, | 32842,   | -27250856, | 1877.2782, | 32880,   | -8650162, | 1874.9250, |
| 4.697270 |            |            | 4.691389 |            |            | 4.685509 |           |            |
| 32805,   | 36069496,  | 1879.5695, | 32843,   | -26678172, | 1877.2163, | 32881,   | -8401984, | 1874.8631, |
| 4.697115 |            |            | 4.691235 |            |            | 4.685354 |           |            |
| 32806,   | 31466236,  | 1879.5076, | 32844,   | -26162752, | 1877.1544, | 32882,   | -8202786, | 1874.8012, |
| 4.696961 |            |            | 4.691080 |            |            | 4.685199 |           |            |
| 32807,   | 26031550,  | 1879.4457, | 32845,   | -25668018, | 1877.0925, | 32883,   | -8024942, | 1874.7392, |
| 4.696806 |            |            | 4.690925 |            |            | 4.685044 |           |            |
| 32808,   | 20227004,  | 1879.3838, | 32846,   | -25128794, | 1877.0305, | 32884,   | -7828062, | 1874.6773, |
| 4.696651 |            |            | 4.690770 |            |            | 4.684890 |           |            |
| 32809,   | 14319208,  | 1879.3218, | 32847,   | -24527010, | 1876.9686, | 32885,   | -7605338, | 1874.6154, |
| 4.696496 |            |            | 4.690616 |            |            | 4.684735 |           |            |
| 32810,   | 8312424,   | 1879.2599, | 32848,   | -23910696, | 1876.9067, | 32886,   | -7389806, | 1874.5535, |
| 4.696342 |            |            | 4.690461 |            |            | 4.684580 |           |            |
| 32811,   | 2147550,   | 1879.1980, | 32849,   | -23335384, | 1876.8448, | 32887,   | -7213966, | 1874.4915, |
| 4.696187 |            |            | 4.690306 |            |            | 4.684425 |           |            |
| 32812,   | -4065194,  | 1879.1360, | 32850,   | -22799446, | 1876.7828, | 32888,   | -7071538, | 1874.4296, |
| 4.696032 |            |            | 4.690151 |            |            | 4.684271 |           |            |
| 32813,   | -10027768, | 1879.0741, | 32851,   | -22249704, | 1876.7209, | 32889,   | -6926506, | 1874.3677, |
| 4.695877 |            |            | 4.689997 |            |            | 4.684116 |           |            |
| 32814,   | -15445790, | 1879.0122, | 32852,   | -21648048, | 1876.6590, | 32890,   | -6757350, | 1874.3057, |
| 4.695723 |            |            | 4.689842 |            |            | 4.683961 |           |            |
| 32815,   | -20204196, | 1878.9503, | 32853,   | -21017786, | 1876.5970, | 32891,   | -6582918, | 1874.2438, |
| 4.695568 |            |            | 4.689687 |            |            | 4.683806 |           |            |
| 32816,   | -24348024, | 1878.8883, | 32854,   | -20415022, | 1876.5351, | 32892,   | -6439328, | 1874.1819, |
| 4.695413 |            |            | 4.689532 |            |            | 4.683652 |           |            |
| 32817,   | -27924454, | 1878.8264, | 32855,   | -19861176, | 1876.4732, | 32893,   | -6336534, | 1874.1200, |
| 4.695258 |            |            | 4.689378 |            |            | 4.683497 |           |            |
| 32818,   | -30886322, | 1878.7645, | 32856,   | -19318138, | 1876.4113, | 32894,   | -6246724, | 1874.0580, |
| 4.695104 |            |            | 4.689223 |            |            | 4.683342 |           |            |
| 32819,   | -33159388, | 1878.7026, | 32857,   | -18734948, | 1876.3493, | 32895,   | -6137894, | 1873.9961, |
| 4.694949 |            |            | 4.689068 |            |            | 4.683187 |           |            |
| 32820,   | -34771814, | 1878.6406, | 32858,   | -18109110, | 1876.2874, | 32896,   | -6011752, | 1873.9342, |
| 4.694794 |            |            | 4.688913 |            |            | 4.683032 |           |            |
| 32821,   | -35878092, | 1878.5787, | 32859,   | -17489622, | 1876.2255, | 32897,   | -5900670, | 1873.8723, |
| 4.694639 |            |            | 4.688759 |            |            | 4.682878 |           |            |
| 32822,   | -36645658, | 1878.5168, | 32860,   | -16919594, | 1876.1636, | 32898,   | -5828108, | 1873.8103, |
| 4.694485 |            |            | 4.688604 |            |            | 4.682723 |           |            |
| 32823,   | -37137390, | 1878.4549, | 32861,   | -16387930, | 1876.1016, | 32899,   | -5780372, | 1873.7484, |
| 4.694330 |            |            | 4.688449 |            |            | 4.682568 |           |            |
| 32824,   | -37321840, | 1878.3929, | 32862,   | -15846908, | 1876.0397, | 32900,   | -5723226, | 1873.6865, |
| 4.694175 |            |            | 4.688294 |            |            | 4.682413 |           |            |
| 32825,   | -37188152, | 1878.3310, | 32863,   | -15272868, | 1875.9778, | 32901,   | -5642772, | 1873.6246, |
| 4.694020 |            |            | 4.688140 |            |            | 4.682259 |           |            |
| 32826,   | -36823012, | 1878.2691, | 32864,   | -14696584, | 1875.9158, | 32902,   | -5561466, | 1873.5626, |
| 4.693866 |            |            | 4.687985 |            |            | 4.682104 |           |            |
| 32827,   | -36361152, | 1878.2071, | 32865,   | -14167810, | 1875.8539, | 32903,   | -5510588, | 1873.5007, |
| 4.693711 |            |            | 4.687830 |            |            | 4.681949 |           |            |
| 32828,   | -35874760, | 1878.1452, | 32866,   | -13697698, | 1875.7920, | 32904,   | -5492798, | 1873.4388, |
| 4.693556 |            |            | 4.687675 |            |            | 4.681794 |           |            |
| 32829,   | -35335600, | 1878.0833, | 32867,   | -13248116, | 1875.7301, | 32905,   | -5479504, | 1873.3768, |
| 4.693401 |            |            | 4.687520 |            |            | 4.681640 |           |            |
| 32830,   | -34691194, | 1878.0214, | 32868,   | -12779586, | 1875.6681, | 32906,   | -5445462, | 1873.3149, |
| 4.693247 |            |            | 4.687366 |            |            | 4.681485 |           |            |
| 32831,   | -33959750, | 1877.9594, | 32869,   | -12299546, | 1875.6062, | 32907,   | -5398506, | 1873.2530, |
| 4.693092 |            |            | 4.687211 |            |            | 4.681330 |           |            |
| 32832,   | -33231040, | 1877.8975, | 32870,   | -11853454, | 1875.5443, | 32908,   | -5368958, | 1873.1911, |
| 4.692937 |            |            | 4.687056 |            |            | 4.681175 |           |            |
| 32833,   | -32576610, | 1877.8356, | 32871,   | -11470290, | 1875.4824, | 32909,   | -5372010, | 1873.1291, |
| 4.692782 |            |            | 4.686901 |            |            | 4.681021 |           |            |
| 32834,   | -31979824, | 1877.7737, | 32872,   | -11128050, | 1875.4204, | 32910,   | -5388576, | 1873.0672, |
| 4.692627 |            |            | 4.686747 |            |            | 4.680866 |           |            |
| 32835,   | -31368404, | 1877.7117, | 32873,   | -10779792, | 1875.3585, | 32911,   | -5387170, | 1873.0053, |
| 4.692473 |            |            | 4.686592 |            |            | 4.680711 |           |            |
| 32836,   | -30707706, | 1877.6498, | 32874,   | -10408312, | 1875.2966, | 32912,   | -5360116, | 1872.9434, |
| 4.692318 |            |            | 4.686437 |            |            | 4.680556 |           |            |
| 32837,   | -30042950, | 1877.5879, | 32875,   | -10044326, | 1875.2347, | 32913,   | -5330566, | 1872.8814, |
| 4.692163 |            |            | 4.686282 |            |            | 4.680402 |           |            |
| 32838,   | -29443236, | 1877.5259, | 32876,   | -9727988,  | 1875.1727, | 32914,   | -5322626, | 1872.8195, |
| 4.692008 |            |            | 4.686128 |            |            | 4.680247 |           |            |
| 32839,   | -28917896, | 1877.4640, | 32877,   | -9460836,  | 1875.1108, | 32915,   | -5331088, | 1872.7576, |
| 4.691854 |            |            | 4.685973 |            |            | 4.680092 |           |            |
| 32840,   | -28405634, | 1877.4021, | 32878,   | -9205328,  | 1875.0489, | 32916,   | -5327262, | 1872.6956, |
| 4.691699 |            |            | 4.685818 |            |            | 4.679937 |           |            |

|          |           |            |          |           |            |          |                            |            |
|----------|-----------|------------|----------|-----------|------------|----------|----------------------------|------------|
| 32917,   | -5293550, | 1872.6337, | 32955,   | -2970910, | 1870.2805, | 32993,   | -608002,                   | 1867.9273, |
| 4.679783 |           |            | 4.673902 |           |            | 4.668021 |                            |            |
| 32918,   | -5244806, | 1872.5718, | 32956,   | -2867106, | 1870.2186, | 32994,   | -577490,                   | 1867.8653, |
| 4.679628 |           |            | 4.673747 |           |            | 4.667866 |                            |            |
| 32919,   | -5210832, | 1872.5099, | 32957,   | -2783562, | 1870.1566, | 32995,   | -556782,                   | 1867.8034, |
| 4.679473 |           |            | 4.673592 |           |            | 4.667711 |                            |            |
| 32920,   | -5201072, | 1872.4479, | 32958,   | -2720858, | 1870.0947, | 32996,   | -546464,                   | 1867.7415, |
| 4.679318 |           |            | 4.673438 |           |            | 4.667557 |                            |            |
| 32921,   | -5193786, | 1872.3860, | 32959,   | -2656002, | 1870.0328, | 32997,   | -530042,                   | 1867.6796, |
| 4.679164 |           |            | 4.673283 |           |            | 4.667402 |                            |            |
| 32922,   | -5162338, | 1872.3241, | 32960,   | -2569732, | 1869.9709, | 32998,   | -493554,                   | 1867.6176, |
| 4.679009 |           |            | 4.673128 |           |            | 4.667247 |                            |            |
| 32923,   | -5106786, | 1872.2622, | 32961,   | -2470966, | 1869.9089, | 32999,   | -442486,                   | 1867.5557, |
| 4.678854 |           |            | 4.672973 |           |            | 4.667092 |                            |            |
| 32924,   | -5053012, | 1872.2002, | 32962,   | -2388744, | 1869.8470, | 33000,   | -395630,                   | 1867.4938, |
| 4.678699 |           |            | 4.672818 |           |            | 4.666938 |                            |            |
| 32925,   | -5021002, | 1872.1383, | 32963,   | -2339672, | 1869.7851, | 33001,   | -363202,                   | 1867.4319, |
| 4.678545 |           |            | 4.672664 |           |            | 4.666783 |                            |            |
| 32926,   | -5000606, | 1872.0764, | 32964,   | -2307966, | 1869.7232, | 33002,   | -335488,                   | 1867.3699, |
| 4.678390 |           |            | 4.672509 |           |            | 4.666628 |                            |            |
| 32927,   | -4963892, | 1872.0145, | 32965,   | -2261294, | 1869.6612, | 33003,   | -295724,                   | 1867.3080, |
| 4.678235 |           |            | 4.672354 |           |            | 4.666473 |                            |            |
| 32928,   | -4898982, | 1871.9525, | 32966,   | -2184832, | 1869.5993, | 33004,   | -241778,                   | 1867.2461, |
| 4.678080 |           |            | 4.672199 |           |            | 4.666319 |                            |            |
| 32929,   | -4824700, | 1871.8906, | 32967,   | -2095238, | 1869.5374, | 33005,   | -190728,                   | 1867.1842, |
| 4.677925 |           |            | 4.672045 |           |            | 4.666164 |                            |            |
| 32930,   | -4768688, | 1871.8287, | 32968,   | -2019806, | 1869.4754, | 33006,   | -160498,                   | 1867.1222, |
| 4.677771 |           |            | 4.671890 |           |            | 4.666009 |                            |            |
| 32931,   | -4735218, | 1871.7667, | 32969,   | -1965520, | 1869.4135, | 33007,   | -150064,                   | 1867.0603, |
| 4.677616 |           |            | 4.671735 |           |            | 4.665854 |                            |            |
| 32932,   | -4701044, | 1871.7048, | 32970,   | -1912824, | 1869.3516, | 33008,   | -141134,                   | 1866.9984, |
| 4.677461 |           |            | 4.671580 |           |            | 4.665700 |                            |            |
| 32933,   | -4643572, | 1871.6429, | 32971,   | -1839118, | 1869.2897, | 33009,   | -118776,                   | 1866.9364, |
| 4.677306 |           |            | 4.671426 |           |            | 4.665545 |                            |            |
| 32934,   | -4567310, | 1871.5810, | 32972,   | -1742996, | 1869.2277, | 33010,   | -86522,                    | 1866.8745, |
| 4.677152 |           |            | 4.671271 |           |            | 4.665390 |                            |            |
| 32935,   | -4497064, | 1871.5190, | 32973,   | -1641956, | 1869.1658, | 33011,   | -58832,                    | 1866.8126, |
| 4.676997 |           |            | 4.671116 |           |            | 4.665235 |                            |            |
| 32936,   | -4446788, | 1871.4571, | 32974,   | -1548994, | 1869.1039, | 33012,   | -41260,                    | 1866.7507, |
| 4.676842 |           |            | 4.670961 |           |            | 4.665081 |                            |            |
| 32937,   | -4401934, | 1871.3952, | 32975,   | -1458074, | 1869.0420, | 33013,   | -22774,                    | 1866.6887, |
| 4.676687 |           |            | 4.670807 |           |            | 4.664926 |                            |            |
| 32938,   | -4336642, | 1871.3333, | 32976,   | -1355600, | 1868.9800, | 33014,   | 10756, 1866.6268, 4.664771 |            |
| 4.676533 |           |            | 4.670652 |           |            | 33015,   | 58880, 1866.5649, 4.664616 |            |
| 32939,   | -4245016, | 1871.2713, | 32977,   | -1242524, | 1868.9181, | 33016,   | 106522,                    | 1866.5030, |
| 4.676378 |           |            | 4.670497 |           |            | 4.664462 |                            |            |
| 32940,   | -4148952, | 1871.2094, | 32978,   | -1138514, | 1868.8562, | 33017,   | 141768,                    | 1866.4410, |
| 4.676223 |           |            | 4.670342 |           |            | 4.664307 |                            |            |
| 32941,   | -4073120, | 1871.1475, | 32979,   | -1062116, | 1868.7943, | 33018,   | 169692,                    | 1866.3791, |
| 4.676068 |           |            | 4.670188 |           |            | 4.664152 |                            |            |
| 32942,   | -4016834, | 1871.0855, | 32980,   | -1010310, | 1868.7323, | 33019,   | 205216,                    | 1866.3172, |
| 4.675914 |           |            | 4.670033 |           |            | 4.663997 |                            |            |
| 32943,   | -3956024, | 1871.0236, | 32981,   | -962090,  | 1868.6704, | 33020,   | 253566,                    | 1866.2553, |
| 4.675759 |           |            | 4.669878 |           |            | 4.663843 |                            |            |
| 32944,   | -3872240, | 1870.9617, | 32982,   | -902134,  | 1868.6085, | 33021,   | 302232,                    | 1866.1933, |
| 4.675604 |           |            | 4.669723 |           |            | 4.663688 |                            |            |
| 32945,   | -3774138, | 1870.8998, | 32983,   | -836836,  | 1868.5465, | 33022,   | 334722,                    | 1866.1314, |
| 4.675449 |           |            | 4.669569 |           |            | 4.663533 |                            |            |
| 32946,   | -3686294, | 1870.8378, | 32984,   | -784614,  | 1868.4846, | 33023,   | 350102,                    | 1866.0695, |
| 4.675295 |           |            | 4.669414 |           |            | 4.663378 |                            |            |
| 32947,   | -3619776, | 1870.7759, | 32985,   | -753068,  | 1868.4227, | 33024,   | 365012,                    | 1866.0075, |
| 4.675140 |           |            | 4.669259 |           |            | 4.663224 |                            |            |
| 32948,   | -3559864, | 1870.7140, | 32986,   | -730626,  | 1868.3608, | 33025,   | 395322,                    | 1865.9456, |
| 4.674985 |           |            | 4.669104 |           |            | 4.663069 |                            |            |
| 32949,   | -3484792, | 1870.6521, | 32987,   | -701846,  | 1868.2988, | 33026,   | 438904,                    | 1865.8837, |
| 4.674830 |           |            | 4.668950 |           |            | 4.662914 |                            |            |
| 32950,   | -3391934, | 1870.5901, | 32988,   | -666904,  | 1868.2369, | 33027,   | 479462,                    | 1865.8218, |
| 4.674676 |           |            | 4.668795 |           |            | 4.662759 |                            |            |
| 32951,   | -3299536, | 1870.5282, | 32989,   | -640962,  | 1868.1750, | 33028,   | 506536,                    | 1865.7598, |
| 4.674521 |           |            | 4.668640 |           |            | 4.662604 |                            |            |
| 32952,   | -3222704, | 1870.4663, | 32990,   | -634344,  | 1868.1131, | 33029,   | 527760,                    | 1865.6979, |
| 4.674366 |           |            | 4.668485 |           |            | 4.662450 |                            |            |
| 32953,   | -3153906, | 1870.4044, | 32991,   | -637932,  | 1868.0511, | 33030,   | 559014,                    | 1865.6360, |
| 4.674211 |           |            | 4.668331 |           |            | 4.662295 |                            |            |
| 32954,   | -3072344, | 1870.3424, | 32992,   | -631972,  | 1867.9892, | 33031,   | 604662,                    | 1865.5741, |
| 4.674057 |           |            | 4.668176 |           |            | 4.662140 |                            |            |

|          |          |            |          |          |            |          |          |            |
|----------|----------|------------|----------|----------|------------|----------|----------|------------|
| 33032,   | 651652,  | 1865.5121, | 33070,   | 1694718, | 1863.1589, | 33108,   | 2116810, | 1860.8057, |
| 4.661985 |          |            | 4.656105 |          |            | 4.650224 |          |            |
| 33033,   | 684490,  | 1865.4502, | 33071,   | 1730992, | 1863.0970, | 33109,   | 2144060, | 1860.7438, |
| 4.661831 |          |            | 4.655950 |          |            | 4.650069 |          |            |
| 33034,   | 703070,  | 1865.3883, | 33072,   | 1749870, | 1863.0351, | 33110,   | 2165914, | 1860.6818, |
| 4.661676 |          |            | 4.655795 |          |            | 4.649914 |          |            |
| 33035,   | 722104,  | 1865.3263, | 33073,   | 1761544, | 1862.9731, | 33111,   | 2194724, | 1860.6199, |
| 4.661521 |          |            | 4.655640 |          |            | 4.649760 |          |            |
| 33036,   | 753140,  | 1865.2644, | 33074,   | 1773564, | 1862.9112, | 33112,   | 2237308, | 1860.5580, |
| 4.661366 |          |            | 4.655486 |          |            | 4.649605 |          |            |
| 33037,   | 790826,  | 1865.2025, | 33075,   | 1780898, | 1862.8493, | 33113,   | 2286504, | 1860.4960, |
| 4.661212 |          |            | 4.655331 |          |            | 4.649450 |          |            |
| 33038,   | 819820,  | 1865.1406, | 33076,   | 1772552, | 1862.7873, | 33114,   | 2329316, | 1860.4341, |
| 4.661057 |          |            | 4.655176 |          |            | 4.649295 |          |            |
| 33039,   | 833766,  | 1865.0786, | 33077,   | 1746240, | 1862.7254, | 33115,   | 2361684, | 1860.3722, |
| 4.660902 |          |            | 4.655021 |          |            | 4.649141 |          |            |
| 33040,   | 843424,  | 1865.0167, | 33078,   | 1712866, | 1862.6635, | 33116,   | 2392110, | 1860.3103, |
| 4.660747 |          |            | 4.654867 |          |            | 4.648986 |          |            |
| 33041,   | 864188,  | 1864.9548, | 33079,   | 1685524, | 1862.6016, | 33117,   | 2429912, | 1860.2483, |
| 4.660593 |          |            | 4.654712 |          |            | 4.648831 |          |            |
| 33042,   | 898008,  | 1864.8929, | 33080,   | 1666714, | 1862.5396, | 33118,   | 2472330, | 1860.1864, |
| 4.660438 |          |            | 4.654557 |          |            | 4.648676 |          |            |
| 33043,   | 931346,  | 1864.8309, | 33081,   | 1649504, | 1862.4777, | 33119,   | 2506032, | 1860.1245, |
| 4.660283 |          |            | 4.654402 |          |            | 4.648522 |          |            |
| 33044,   | 951478,  | 1864.7690, | 33082,   | 1630918, | 1862.4158, | 33120,   | 2521196, | 1860.0626, |
| 4.660128 |          |            | 4.654248 |          |            | 4.648367 |          |            |
| 33045,   | 961592,  | 1864.7071, | 33083,   | 1620248, | 1862.3539, | 33121,   | 2521622, | 1860.0006, |
| 4.659974 |          |            | 4.654093 |          |            | 4.648212 |          |            |
| 33046,   | 976762,  | 1864.6452, | 33084,   | 1630820, | 1862.2919, | 33122,   | 2519310, | 1859.9387, |
| 4.659819 |          |            | 4.653938 |          |            | 4.648057 |          |            |
| 33047,   | 1005862, | 1864.5832, | 33085,   | 1664008, | 1862.2300, | 33123,   | 2520588, | 1859.8768, |
| 4.659664 |          |            | 4.653783 |          |            | 4.647903 |          |            |
| 33048,   | 1041286, | 1864.5213, | 33086,   | 1704672, | 1862.1681, | 33124,   | 2520522, | 1859.8149, |
| 4.659509 |          |            | 4.653629 |          |            | 4.647748 |          |            |
| 33049,   | 1068582, | 1864.4594, | 33087,   | 1734528, | 1862.1061, | 33125,   | 2511810, | 1859.7529, |
| 4.659355 |          |            | 4.653474 |          |            | 4.647593 |          |            |
| 33050,   | 1084212, | 1864.3974, | 33088,   | 1748892, | 1862.0442, | 33126,   | 2496484, | 1859.6910, |
| 4.659200 |          |            | 4.653319 |          |            | 4.647438 |          |            |
| 33051,   | 1099964, | 1864.3355, | 33089,   | 1758238, | 1861.9823, | 33127,   | 2485614, | 1859.6291, |
| 4.659045 |          |            | 4.653164 |          |            | 4.647283 |          |            |
| 33052,   | 1128762, | 1864.2736, | 33090,   | 1773468, | 1861.9204, | 33128,   | 2486982, | 1859.5671, |
| 4.658890 |          |            | 4.653010 |          |            | 4.647129 |          |            |
| 33053,   | 1168950, | 1864.2117, | 33091,   | 1792680, | 1861.8584, | 33129,   | 2495752, | 1859.5052, |
| 4.658736 |          |            | 4.652855 |          |            | 4.646974 |          |            |
| 33054,   | 1205834, | 1864.1497, | 33092,   | 1804796, | 1861.7965, | 33130,   | 2499798, | 1859.4433, |
| 4.658581 |          |            | 4.652700 |          |            | 4.646819 |          |            |
| 33055,   | 1228550, | 1864.0878, | 33093,   | 1804900, | 1861.7346, | 33131,   | 2493806, | 1859.3814, |
| 4.658426 |          |            | 4.652545 |          |            | 4.646664 |          |            |
| 33056,   | 1242032, | 1864.0259, | 33094,   | 1802242, | 1861.6727, | 33132,   | 2485536, | 1859.3194, |
| 4.658271 |          |            | 4.652390 |          |            | 4.646510 |          |            |
| 33057,   | 1260116, | 1863.9640, | 33095,   | 1810786, | 1861.6107, | 33133,   | 2486796, | 1859.2575, |
| 4.658117 |          |            | 4.652236 |          |            | 4.646355 |          |            |
| 33058,   | 1288550, | 1863.9020, | 33096,   | 1833588, | 1861.5488, | 33134,   | 2499824, | 1859.1956, |
| 4.657962 |          |            | 4.652081 |          |            | 4.646200 |          |            |
| 33059,   | 1318596, | 1863.8401, | 33097,   | 1859726, | 1861.4869, | 33135,   | 2515116, | 1859.1337, |
| 4.657807 |          |            | 4.651926 |          |            | 4.646045 |          |            |
| 33060,   | 1338860, | 1863.7782, | 33098,   | 1877638, | 1861.4250, | 33136,   | 2523000, | 1859.0717, |
| 4.657652 |          |            | 4.651771 |          |            | 4.645891 |          |            |
| 33061,   | 1350690, | 1863.7162, | 33099,   | 1888958, | 1861.3630, | 33137,   | 2525008, | 1859.0098, |
| 4.657497 |          |            | 4.651617 |          |            | 4.645736 |          |            |
| 33062,   | 1368154, | 1863.6543, | 33100,   | 1906262, | 1861.3011, | 33138,   | 2531566, | 1858.9479, |
| 4.657343 |          |            | 4.651462 |          |            | 4.645581 |          |            |
| 33063,   | 1402270, | 1863.5924, | 33101,   | 1937296, | 1861.2392, | 33139,   | 2549074, | 1858.8859, |
| 4.657188 |          |            | 4.651307 |          |            | 4.645426 |          |            |
| 33064,   | 1448192, | 1863.5305, | 33102,   | 1974636, | 1861.1772, | 33140,   | 2572050, | 1858.8240, |
| 4.657033 |          |            | 4.651152 |          |            | 4.645272 |          |            |
| 33065,   | 1490844, | 1863.4685, | 33103,   | 2003298, | 1861.1153, | 33141,   | 2589686, | 1858.7621, |
| 4.656878 |          |            | 4.650998 |          |            | 4.645117 |          |            |
| 33066,   | 1522434, | 1863.4066, | 33104,   | 2017660, | 1861.0534, | 33142,   | 2598706, | 1858.7002, |
| 4.656724 |          |            | 4.650843 |          |            | 4.644962 |          |            |
| 33067,   | 1551124, | 1863.3447, | 33105,   | 2027840, | 1860.9915, | 33143,   | 2606934, | 1858.6382, |
| 4.656569 |          |            | 4.650688 |          |            | 4.644807 |          |            |
| 33068,   | 1590596, | 1863.2828, | 33106,   | 2048186, | 1860.9295, | 33144,   | 2623364, | 1858.5763, |
| 4.656414 |          |            | 4.650533 |          |            | 4.644653 |          |            |
| 33069,   | 1642908, | 1863.2208, | 33107,   | 2081416, | 1860.8676, | 33145,   | 2646868, | 1858.5144, |
| 4.656259 |          |            | 4.650379 |          |            | 4.644498 |          |            |

|          |          |            |          |          |            |          |          |            |
|----------|----------|------------|----------|----------|------------|----------|----------|------------|
| 33146,   | 2667250, | 1858.4525, | 33184,   | 3022562, | 1856.0992, | 33222,   | 3220520, | 1853.7460, |
| 4.644343 |          |            | 4.638462 |          |            | 4.632581 |          |            |
| 33147,   | 2677396, | 1858.3905, | 33185,   | 3022242, | 1856.0373, | 33223,   | 3218896, | 1853.6841, |
| 4.644188 |          |            | 4.638308 |          |            | 4.632427 |          |            |
| 33148,   | 2681816, | 1858.3286, | 33186,   | 3018082, | 1855.9754, | 33224,   | 3213738, | 1853.6222, |
| 4.644034 |          |            | 4.638153 |          |            | 4.632272 |          |            |
| 33149,   | 2691282, | 1858.2667, | 33187,   | 3019992, | 1855.9135, | 33225,   | 3213766, | 1853.5602, |
| 4.643879 |          |            | 4.637998 |          |            | 4.632117 |          |            |
| 33150,   | 2709988, | 1858.2048, | 33188,   | 3030732, | 1855.8515, | 33226,   | 3220310, | 1853.4983, |
| 4.643724 |          |            | 4.637843 |          |            | 4.631962 |          |            |
| 33151,   | 2730712, | 1858.1428, | 33189,   | 3042470, | 1855.7896, | 33227,   | 3225884, | 1853.4364, |
| 4.643569 |          |            | 4.637688 |          |            | 4.631808 |          |            |
| 33152,   | 2743728, | 1858.0809, | 33190,   | 3046036, | 1855.7277, | 33228,   | 3223420, | 1853.3745, |
| 4.643415 |          |            | 4.637534 |          |            | 4.631653 |          |            |
| 33153,   | 2748640, | 1858.0190, | 33191,   | 3041686, | 1855.6657, | 33229,   | 3214998, | 1853.3125, |
| 4.643260 |          |            | 4.637379 |          |            | 4.631498 |          |            |
| 33154,   | 2754876, | 1857.9570, | 33192,   | 3038610, | 1855.6038, | 33230,   | 3209516, | 1853.2506, |
| 4.643105 |          |            | 4.637224 |          |            | 4.631343 |          |            |
| 33155,   | 2770208, | 1857.8951, | 33193,   | 3043746, | 1855.5419, | 33231,   | 3212144, | 1853.1887, |
| 4.642950 |          |            | 4.637069 |          |            | 4.631189 |          |            |
| 33156,   | 2791280, | 1857.8332, | 33194,   | 3053408, | 1855.4800, | 33232,   | 3218216, | 1853.1267, |
| 4.642796 |          |            | 4.636915 |          |            | 4.631034 |          |            |
| 33157,   | 2807570, | 1857.7713, | 33195,   | 3057726, | 1855.4180, | 33233,   | 3218954, | 1853.0648, |
| 4.642641 |          |            | 4.636760 |          |            | 4.630879 |          |            |
| 33158,   | 2814072, | 1857.7093, | 33196,   | 3052482, | 1855.3561, | 33234,   | 3212186, | 1853.0029, |
| 4.642486 |          |            | 4.636605 |          |            | 4.630724 |          |            |
| 33159,   | 2817430, | 1857.6474, | 33197,   | 3044244, | 1855.2942, | 33235,   | 3205102, | 1852.9410, |
| 4.642331 |          |            | 4.636450 |          |            | 4.630570 |          |            |
| 33160,   | 2827972, | 1857.5855, | 33198,   | 3042736, | 1855.2323, | 33236,   | 3205768, | 1852.8790, |
| 4.642176 |          |            | 4.636296 |          |            | 4.630415 |          |            |
| 33161,   | 2847242, | 1857.5236, | 33199,   | 3049622, | 1855.1703, | 33237,   | 3213536, | 1852.8171, |
| 4.642022 |          |            | 4.636141 |          |            | 4.630260 |          |            |
| 33162,   | 2865980, | 1857.4616, | 33200,   | 3057118, | 1855.1084, | 33238,   | 3219862, | 1852.7552, |
| 4.641867 |          |            | 4.635986 |          |            | 4.630105 |          |            |
| 33163,   | 2875050, | 1857.3997, | 33201,   | 3057778, | 1855.0465, | 33239,   | 3218544, | 1852.6933, |
| 4.641712 |          |            | 4.635831 |          |            | 4.629951 |          |            |
| 33164,   | 2876348, | 1857.3378, | 33202,   | 3053596, | 1854.9846, | 33240,   | 3213094, | 1852.6313, |
| 4.641557 |          |            | 4.635677 |          |            | 4.629796 |          |            |
| 33165,   | 2880572, | 1857.2758, | 33203,   | 3053474, | 1854.9226, | 33241,   | 3212418, | 1852.5694, |
| 4.641403 |          |            | 4.635522 |          |            | 4.629641 |          |            |
| 33166,   | 2894520, | 1857.2139, | 33204,   | 3062368, | 1854.8607, | 33242,   | 3220000, | 1852.5075, |
| 4.641248 |          |            | 4.635367 |          |            | 4.629486 |          |            |
| 33167,   | 2913038, | 1857.1520, | 33205,   | 3075290, | 1854.7988, | 33243,   | 3229566, | 1852.4456, |
| 4.641093 |          |            | 4.635212 |          |            | 4.629332 |          |            |
| 33168,   | 2925174, | 1857.0901, | 33206,   | 3083442, | 1854.7368, | 33244,   | 3232414, | 1852.3836, |
| 4.640938 |          |            | 4.635058 |          |            | 4.629177 |          |            |
| 33169,   | 2927184, | 1857.0281, | 33207,   | 3084940, | 1854.6749, | 33245,   | 3227670, | 1852.3217, |
| 4.640784 |          |            | 4.634903 |          |            | 4.629022 |          |            |
| 33170,   | 2926852, | 1856.9662, | 33208,   | 3087122, | 1854.6130, | 33246,   | 3223170, | 1852.2598, |
| 4.640629 |          |            | 4.634748 |          |            | 4.628867 |          |            |
| 33171,   | 2934134, | 1856.9043, | 33209,   | 3097604, | 1854.5511, | 33247,   | 3226018, | 1852.1978, |
| 4.640474 |          |            | 4.634593 |          |            | 4.628713 |          |            |
| 33172,   | 2949382, | 1856.8424, | 33210,   | 3114938, | 1854.4891, | 33248,   | 3234090, | 1852.1359, |
| 4.640319 |          |            | 4.634439 |          |            | 4.628558 |          |            |
| 33173,   | 2963182, | 1856.7804, | 33211,   | 3130122, | 1854.4272, | 33249,   | 3238674, | 1852.0740, |
| 4.640165 |          |            | 4.634284 |          |            | 4.628403 |          |            |
| 33174,   | 2967868, | 1856.7185, | 33212,   | 3137218, | 1854.3653, | 33250,   | 3234946, | 1852.0121, |
| 4.640010 |          |            | 4.634129 |          |            | 4.628248 |          |            |
| 33175,   | 2966750, | 1856.6566, | 33213,   | 3140270, | 1854.3034, | 33251,   | 3227766, | 1851.9501, |
| 4.639855 |          |            | 4.633974 |          |            | 4.628094 |          |            |
| 33176,   | 2969990, | 1856.5947, | 33214,   | 3148200, | 1854.2414, | 33252,   | 3225850, | 1851.8882, |
| 4.639700 |          |            | 4.633820 |          |            | 4.627939 |          |            |
| 33177,   | 2982204, | 1856.5327, | 33215,   | 3163842, | 1854.1795, | 33253,   | 3231420, | 1851.8263, |
| 4.639546 |          |            | 4.633665 |          |            | 4.627784 |          |            |
| 33178,   | 2996702, | 1856.4708, | 33216,   | 3180306, | 1854.1176, | 33254,   | 3237710, | 1851.7644, |
| 4.639391 |          |            | 4.633510 |          |            | 4.627629 |          |            |
| 33179,   | 3003362, | 1856.4089, | 33217,   | 3189090, | 1854.0556, | 33255,   | 3237288, | 1851.7024, |
| 4.639236 |          |            | 4.633355 |          |            | 4.627474 |          |            |
| 33180,   | 3000636, | 1856.3469, | 33218,   | 3190096, | 1853.9937, | 33256,   | 3231092, | 1851.6405, |
| 4.639081 |          |            | 4.633201 |          |            | 4.627320 |          |            |
| 33181,   | 2997382, | 1856.2850, | 33219,   | 3191618, | 1853.9318, | 33257,   | 3227376, | 1851.5786, |
| 4.638927 |          |            | 4.633046 |          |            | 4.627165 |          |            |
| 33182,   | 3002356, | 1856.2231, | 33220,   | 3200252, | 1853.8699, | 33258,   | 3231842, | 1851.5166, |
| 4.638772 |          |            | 4.632891 |          |            | 4.627010 |          |            |
| 33183,   | 3013970, | 1856.1612, | 33221,   | 3212908, | 1853.8079, | 33259,   | 3240866, | 1851.4547, |
| 4.638617 |          |            | 4.632736 |          |            | 4.626855 |          |            |

|          |          |            |          |          |            |          |          |            |
|----------|----------|------------|----------|----------|------------|----------|----------|------------|
| 33260,   | 3245866, | 1851.3928, | 33298,   | 3329086, | 1849.0396, | 33336,   | 3325930, | 1846.6863, |
| 4.626701 |          |            | 4.620820 |          |            | 4.614939 |          |            |
| 33261,   | 3243552, | 1851.3309, | 33299,   | 3325580, | 1848.9776, | 33337,   | 3319880, | 1846.6244, |
| 4.626546 |          |            | 4.620665 |          |            | 4.614784 |          |            |
| 33262,   | 3239706, | 1851.2689, | 33300,   | 3320818, | 1848.9157, | 33338,   | 3314188, | 1846.5625, |
| 4.626391 |          |            | 4.620510 |          |            | 4.614630 |          |            |
| 33263,   | 3242060, | 1851.2070, | 33301,   | 3321784, | 1848.8538, | 33339,   | 3314684, | 1846.5006, |
| 4.626236 |          |            | 4.620356 |          |            | 4.614475 |          |            |
| 33264,   | 3250896, | 1851.1451, | 33302,   | 3328030, | 1848.7919, | 33340,   | 3319786, | 1846.4386, |
| 4.626082 |          |            | 4.620201 |          |            | 4.614320 |          |            |
| 33265,   | 3258682, | 1851.0832, | 33303,   | 3332410, | 1848.7299, | 33341,   | 3322462, | 1846.3767, |
| 4.625927 |          |            | 4.620046 |          |            | 4.614165 |          |            |
| 33266,   | 3259122, | 1851.0212, | 33304,   | 3329818, | 1848.6680, | 33342,   | 3318752, | 1846.3148, |
| 4.625772 |          |            | 4.619891 |          |            | 4.614011 |          |            |
| 33267,   | 3254704, | 1850.9593, | 33305,   | 3323396, | 1848.6061, | 33343,   | 3312612, | 1846.2529, |
| 4.625617 |          |            | 4.619737 |          |            | 4.613856 |          |            |
| 33268,   | 3253634, | 1850.8974, | 33306,   | 3320662, | 1848.5442, | 33344,   | 3311158, | 1846.1909, |
| 4.625463 |          |            | 4.619582 |          |            | 4.613701 |          |            |
| 33269,   | 3259922, | 1850.8355, | 33307,   | 3324378, | 1848.4822, | 33345,   | 3316090, | 1846.1290, |
| 4.625308 |          |            | 4.619427 |          |            | 4.613546 |          |            |
| 33270,   | 3268574, | 1850.7735, | 33308,   | 3329152, | 1848.4203, | 33346,   | 3321536, | 1846.0671, |
| 4.625153 |          |            | 4.619272 |          |            | 4.613392 |          |            |
| 33271,   | 3271602, | 1850.7116, | 33309,   | 3327980, | 1848.3584, | 33347,   | 3321042, | 1846.0052, |
| 4.624998 |          |            | 4.619118 |          |            | 4.613237 |          |            |
| 33272,   | 3267656, | 1850.6497, | 33310,   | 3320806, | 1848.2964, | 33348,   | 3315248, | 1845.9432, |
| 4.624844 |          |            | 4.618963 |          |            | 4.613082 |          |            |
| 33273,   | 3263616, | 1850.5877, | 33311,   | 3314792, | 1848.2345, | 33349,   | 3311162, | 1845.8813, |
| 4.624689 |          |            | 4.618808 |          |            | 4.612927 |          |            |
| 33274,   | 3266282, | 1850.5258, | 33312,   | 3315904, | 1848.1726, | 33350,   | 3313784, | 1845.8194, |
| 4.624534 |          |            | 4.618653 |          |            | 4.612773 |          |            |
| 33275,   | 3274188, | 1850.4639, | 33313,   | 3321894, | 1848.1107, | 33351,   | 3320144, | 1845.7574, |
| 4.624379 |          |            | 4.618499 |          |            | 4.612618 |          |            |
| 33276,   | 3279396, | 1850.4020, | 33314,   | 3325040, | 1848.0487, | 33352,   | 3322830, | 1845.6955, |
| 4.624225 |          |            | 4.618344 |          |            | 4.612463 |          |            |
| 33277,   | 3277130, | 1850.3400, | 33315,   | 3321394, | 1847.9868, | 33353,   | 3318796, | 1845.6336, |
| 4.624070 |          |            | 4.618189 |          |            | 4.612308 |          |            |
| 33278,   | 3271596, | 1850.2781, | 33316,   | 3315420, | 1847.9249, | 33354,   | 3312934, | 1845.5717, |
| 4.623915 |          |            | 4.618034 |          |            | 4.612153 |          |            |
| 33279,   | 3271074, | 1850.2162, | 33317,   | 3314552, | 1847.8630, | 33355,   | 3312202, | 1845.5097, |
| 4.623760 |          |            | 4.617880 |          |            | 4.611999 |          |            |
| 33280,   | 3278006, | 1850.1543, | 33318,   | 3320210, | 1847.8010, | 33356,   | 3317418, | 1845.4478, |
| 4.623606 |          |            | 4.617725 |          |            | 4.611844 |          |            |
| 33281,   | 3286100, | 1850.0923, | 33319,   | 3326102, | 1847.7391, | 33357,   | 3322402, | 1845.3859, |
| 4.623451 |          |            | 4.617570 |          |            | 4.611689 |          |            |
| 33282,   | 3287814, | 1850.0304, | 33320,   | 3325754, | 1847.6772, | 33358,   | 3321520, | 1845.3240, |
| 4.623296 |          |            | 4.617415 |          |            | 4.611534 |          |            |
| 33283,   | 3283316, | 1849.9685, | 33321,   | 3320254, | 1847.6153, | 33359,   | 3316396, | 1845.2620, |
| 4.623141 |          |            | 4.617260 |          |            | 4.611380 |          |            |
| 33284,   | 3280230, | 1849.9065, | 33322,   | 3316850, | 1847.5533, | 33360,   | 3313828, | 1845.2001, |
| 4.622987 |          |            | 4.617106 |          |            | 4.611225 |          |            |
| 33285,   | 3284516, | 1849.8446, | 33323,   | 3320170, | 1847.4914, | 33361,   | 3317486, | 1845.1382, |
| 4.622832 |          |            | 4.616951 |          |            | 4.611070 |          |            |
| 33286,   | 3293498, | 1849.7827, | 33324,   | 3326630, | 1847.4295, | 33362,   | 3323400, | 1845.0762, |
| 4.622677 |          |            | 4.616796 |          |            | 4.610915 |          |            |
| 33287,   | 3299264, | 1849.7208, | 33325,   | 3328696, | 1847.3675, | 33363,   | 3324640, | 1845.0143, |
| 4.622522 |          |            | 4.616641 |          |            | 4.610761 |          |            |
| 33288,   | 3298264, | 1849.6588, | 33326,   | 3323936, | 1847.3056, | 33364,   | 3319504, | 1844.9524, |
| 4.622367 |          |            | 4.616487 |          |            | 4.610606 |          |            |
| 33289,   | 3295486, | 1849.5969, | 33327,   | 3317964, | 1847.2437, | 33365,   | 3313442, | 1844.8905, |
| 4.622213 |          |            | 4.616332 |          |            | 4.610451 |          |            |
| 33290,   | 3298246, | 1849.5350, | 33328,   | 3317748, | 1847.1818, | 33366,   | 3312426, | 1844.8285, |
| 4.622058 |          |            | 4.616177 |          |            | 4.610296 |          |            |
| 33291,   | 3307140, | 1849.4731, | 33329,   | 3323398, | 1847.1198, | 33367,   | 3315828, | 1844.7666, |
| 4.621903 |          |            | 4.616022 |          |            | 4.610142 |          |            |
| 33292,   | 3315136, | 1849.4111, | 33330,   | 3328126, | 1847.0579, | 33368,   | 3317336, | 1844.7047, |
| 4.621748 |          |            | 4.615868 |          |            | 4.609987 |          |            |
| 33293,   | 3315962, | 1849.3492, | 33331,   | 3326430, | 1846.9960, | 33369,   | 3312702, | 1844.6428, |
| 4.621594 |          |            | 4.615713 |          |            | 4.609832 |          |            |
| 33294,   | 3311674, | 1849.2873, | 33332,   | 3320578, | 1846.9341, | 33370,   | 3304972, | 1844.5808, |
| 4.621439 |          |            | 4.615558 |          |            | 4.609677 |          |            |
| 33295,   | 3310292, | 1849.2254, | 33333,   | 3317696, | 1846.8721, | 33371,   | 3300884, | 1844.5189, |
| 4.621284 |          |            | 4.615403 |          |            | 4.609523 |          |            |
| 33296,   | 3316288, | 1849.1634, | 33334,   | 3321036, | 1846.8102, | 33372,   | 3302818, | 1844.4570, |
| 4.621129 |          |            | 4.615249 |          |            | 4.609368 |          |            |
| 33297,   | 3325246, | 1849.1015, | 33335,   | 3326054, | 1846.7483, | 33373,   | 3306024, | 1844.3951, |
| 4.620975 |          |            | 4.615094 |          |            | 4.609213 |          |            |



|          |          |            |          |          |            |          |          |            |
|----------|----------|------------|----------|----------|------------|----------|----------|------------|
| 33374,   | 3304442, | 1844.3331, | 33412,   | 3236952, | 1841.9799, | 33450,   | 3151844, | 1839.6267, |
| 4.609058 |          |            | 4.603178 |          |            | 4.597297 |          |            |
| 33375,   | 3298046, | 1844.2712, | 33413,   | 3229154, | 1841.9180, | 33451,   | 3144696, | 1839.5648, |
| 4.608904 |          |            | 4.603023 |          |            | 4.597142 |          |            |
| 33376,   | 3292850, | 1844.2093, | 33414,   | 3223496, | 1841.8560, | 33452,   | 3139856, | 1839.5028, |
| 4.608749 |          |            | 4.602868 |          |            | 4.596987 |          |            |
| 33377,   | 3293578, | 1844.1473, | 33415,   | 3223892, | 1841.7941, | 33453,   | 3140504, | 1839.4409, |
| 4.608594 |          |            | 4.602713 |          |            | 4.596832 |          |            |
| 33378,   | 3297826, | 1844.0854, | 33416,   | 3227108, | 1841.7322, | 33454,   | 3143320, | 1839.3790, |
| 4.608439 |          |            | 4.602559 |          |            | 4.596678 |          |            |
| 33379,   | 3298802, | 1844.0235, | 33417,   | 3226526, | 1841.6703, | 33455,   | 3142450, | 1839.3170, |
| 4.608285 |          |            | 4.602404 |          |            | 4.596523 |          |            |
| 33380,   | 3293328, | 1843.9616, | 33418,   | 3219994, | 1841.6083, | 33456,   | 3136462, | 1839.2551, |
| 4.608130 |          |            | 4.602249 |          |            | 4.596368 |          |            |
| 33381,   | 3285584, | 1843.8996, | 33419,   | 3212364, | 1841.5464, | 33457,   | 3129962, | 1839.1932, |
| 4.607975 |          |            | 4.602094 |          |            | 4.596213 |          |            |
| 33382,   | 3282096, | 1843.8377, | 33420,   | 3209754, | 1841.4845, | 33458,   | 3127952, | 1839.1313, |
| 4.607820 |          |            | 4.601939 |          |            | 4.596059 |          |            |
| 33383,   | 3284020, | 1843.7758, | 33421,   | 3212358, | 1841.4226, | 33459,   | 3129826, | 1839.0693, |
| 4.607666 |          |            | 4.601785 |          |            | 4.595904 |          |            |
| 33384,   | 3286000, | 1843.7139, | 33422,   | 3214374, | 1841.3606, | 33460,   | 3130166, | 1839.0074, |
| 4.607511 |          |            | 4.601630 |          |            | 4.595749 |          |            |
| 33385,   | 3282852, | 1843.6519, | 33423,   | 3211042, | 1841.2987, | 33461,   | 3125450, | 1838.9455, |
| 4.607356 |          |            | 4.601475 |          |            | 4.595594 |          |            |
| 33386,   | 3275980, | 1843.5900, | 33424,   | 3204328, | 1841.2368, | 33462,   | 3118362, | 1838.8836, |
| 4.607201 |          |            | 4.601320 |          |            | 4.595440 |          |            |
| 33387,   | 3271716, | 1843.5281, | 33425,   | 3200452, | 1841.1749, | 33463,   | 3114584, | 1838.8216, |
| 4.607046 |          |            | 4.601166 |          |            | 4.595285 |          |            |
| 33388,   | 3273638, | 1843.4661, | 33426,   | 3202260, | 1841.1129, | 33464,   | 3115840, | 1838.7597, |
| 4.606892 |          |            | 4.601011 |          |            | 4.595130 |          |            |
| 33389,   | 3278078, | 1843.4042, | 33427,   | 3205700, | 1841.0510, | 33465,   | 3117678, | 1838.6978, |
| 4.606737 |          |            | 4.600856 |          |            | 4.594975 |          |            |
| 33390,   | 3278308, | 1843.3423, | 33428,   | 3204562, | 1840.9891, | 33466,   | 3114744, | 1838.6359, |
| 4.606582 |          |            | 4.600701 |          |            | 4.594821 |          |            |
| 33391,   | 3272442, | 1843.2804, | 33429,   | 3197924, | 1840.9271, | 33467,   | 3107280, | 1838.5739, |
| 4.606427 |          |            | 4.600547 |          |            | 4.594666 |          |            |
| 33392,   | 3265552, | 1843.2184, | 33430,   | 3191248, | 1840.8652, | 33468,   | 3100956, | 1838.5120, |
| 4.606273 |          |            | 4.600392 |          |            | 4.594511 |          |            |
| 33393,   | 3263558, | 1843.1565, | 33431,   | 3189940, | 1840.8033, | 33469,   | 3100212, | 1838.4501, |
| 4.606118 |          |            | 4.600237 |          |            | 4.594356 |          |            |
| 33394,   | 3266160, | 1843.0946, | 33432,   | 3193028, | 1840.7414, | 33470,   | 3102974, | 1838.3881, |
| 4.605963 |          |            | 4.600082 |          |            | 4.594202 |          |            |
| 33395,   | 3267304, | 1843.0327, | 33433,   | 3194476, | 1840.6794, | 33471,   | 3103074, | 1838.3262, |
| 4.605808 |          |            | 4.599928 |          |            | 4.594047 |          |            |
| 33396,   | 3262522, | 1842.9707, | 33434,   | 3190490, | 1840.6175, | 33472,   | 3097522, | 1838.2643, |
| 4.605654 |          |            | 4.599773 |          |            | 4.593892 |          |            |
| 33397,   | 3254332, | 1842.9088, | 33435,   | 3183986, | 1840.5556, | 33473,   | 3089974, | 1838.2024, |
| 4.605499 |          |            | 4.599618 |          |            | 4.593737 |          |            |
| 33398,   | 3249262, | 1842.8469, | 33436,   | 3180890, | 1840.4937, | 33474,   | 3086302, | 1838.1404, |
| 4.605344 |          |            | 4.599463 |          |            | 4.593583 |          |            |
| 33399,   | 3250148, | 1842.7850, | 33437,   | 3182820, | 1840.4317, | 33475,   | 3087616, | 1838.0785, |
| 4.605189 |          |            | 4.599309 |          |            | 4.593428 |          |            |
| 33400,   | 3252994, | 1842.7230, | 33438,   | 3185010, | 1840.3698, | 33476,   | 3089080, | 1838.0166, |
| 4.605035 |          |            | 4.599154 |          |            | 4.593273 |          |            |
| 33401,   | 3252060, | 1842.6611, | 33439,   | 3181994, | 1840.3079, | 33477,   | 3085826, | 1837.9547, |
| 4.604880 |          |            | 4.598999 |          |            | 4.593118 |          |            |
| 33402,   | 3246936, | 1842.5992, | 33440,   | 3174256, | 1840.2460, | 33478,   | 3078838, | 1837.8927, |
| 4.604725 |          |            | 4.598844 |          |            | 4.592964 |          |            |
| 33403,   | 3242980, | 1842.5372, | 33441,   | 3167772, | 1840.1840, | 33479,   | 3073766, | 1837.8308, |
| 4.604570 |          |            | 4.598690 |          |            | 4.592809 |          |            |
| 33404,   | 3244622, | 1842.4753, | 33442,   | 3166996, | 1840.1221, | 33480,   | 3074080, | 1837.7689, |
| 4.604416 |          |            | 4.598535 |          |            | 4.592654 |          |            |
| 33405,   | 3249666, | 1842.4134, | 33443,   | 3169638, | 1840.0602, | 33481,   | 3076916, | 1837.7069, |
| 4.604261 |          |            | 4.598380 |          |            | 4.592499 |          |            |
| 33406,   | 3251590, | 1842.3515, | 33444,   | 3169450, | 1839.9982, | 33482,   | 3076522, | 1837.6450, |
| 4.604106 |          |            | 4.598225 |          |            | 4.592344 |          |            |
| 33407,   | 3247156, | 1842.2895, | 33445,   | 3163650, | 1839.9363, | 33483,   | 3071174, | 1837.5831, |
| 4.603951 |          |            | 4.598071 |          |            | 4.592190 |          |            |
| 33408,   | 3240198, | 1842.2276, | 33446,   | 3156150, | 1839.8744, | 33484,   | 3065198, | 1837.5212, |
| 4.603797 |          |            | 4.597916 |          |            | 4.592035 |          |            |
| 33409,   | 3237016, | 1842.1657, | 33447,   | 3152764, | 1839.8125, | 33485,   | 3063676, | 1837.4592, |
| 4.603642 |          |            | 4.597761 |          |            | 4.591880 |          |            |
| 33410,   | 3238870, | 1842.1038, | 33448,   | 3154244, | 1839.7505, | 33486,   | 3066194, | 1837.3973, |
| 4.603487 |          |            | 4.597606 |          |            | 4.591725 |          |            |
| 33411,   | 3240586, | 1842.0418, | 33449,   | 3155500, | 1839.6886, | 33487,   | 3067222, | 1837.3354, |
| 4.603332 |          |            | 4.597452 |          |            | 4.591571 |          |            |

|          |          |            |          |          |            |          |          |            |
|----------|----------|------------|----------|----------|------------|----------|----------|------------|
| 33488,   | 3062702, | 1837.2735, | 33526,   | 2972232, | 1834.9202, | 33564,   | 2884992, | 1832.5670, |
| 4.591416 |          |            | 4.585535 |          |            | 4.579654 |          |            |
| 33489,   | 3054926, | 1837.2115, | 33527,   | 2966392, | 1834.8583, | 33565,   | 2879222, | 1832.5051, |
| 4.591261 |          |            | 4.585380 |          |            | 4.579500 |          |            |
| 33490,   | 3049896, | 1837.1496, | 33528,   | 2963338, | 1834.7964, | 33566,   | 2877464, | 1832.4432, |
| 4.591106 |          |            | 4.585226 |          |            | 4.579345 |          |            |
| 33491,   | 3050270, | 1837.0877, | 33529,   | 2964642, | 1834.7345, | 33567,   | 2880588, | 1832.3812, |
| 4.590952 |          |            | 4.585071 |          |            | 4.579190 |          |            |
| 33492,   | 3052316, | 1837.0258, | 33530,   | 2966152, | 1834.6725, | 33568,   | 2884062, | 1832.3193, |
| 4.590797 |          |            | 4.584916 |          |            | 4.579035 |          |            |
| 33493,   | 3050462, | 1836.9638, | 33531,   | 2962992, | 1834.6106, | 33569,   | 2883252, | 1832.2574, |
| 4.590642 |          |            | 4.584761 |          |            | 4.578881 |          |            |
| 33494,   | 3043964, | 1836.9019, | 33532,   | 2955476, | 1834.5487, | 33570,   | 2878784, | 1832.1955, |
| 4.590487 |          |            | 4.584607 |          |            | 4.578726 |          |            |
| 33495,   | 3037746, | 1836.8400, | 33533,   | 2948856, | 1834.4867, | 33571,   | 2875502, | 1832.1335, |
| 4.590333 |          |            | 4.584452 |          |            | 4.578571 |          |            |
| 33496,   | 3036392, | 1836.7780, | 33534,   | 2947124, | 1834.4248, | 33572,   | 2876334, | 1832.0716, |
| 4.590178 |          |            | 4.584297 |          |            | 4.578416 |          |            |
| 33497,   | 3038618, | 1836.7161, | 33535,   | 2948352, | 1834.3629, | 33573,   | 2878428, | 1832.0097, |
| 4.590023 |          |            | 4.584142 |          |            | 4.578262 |          |            |
| 33498,   | 3038772, | 1836.6542, | 33536,   | 2947094, | 1834.3010, | 33574,   | 2876280, | 1831.9477, |
| 4.589868 |          |            | 4.583988 |          |            | 4.578107 |          |            |
| 33499,   | 3033558, | 1836.5923, | 33537,   | 2941022, | 1834.2390, | 33575,   | 2868254, | 1831.8858, |
| 4.589714 |          |            | 4.583833 |          |            | 4.577952 |          |            |
| 33500,   | 3025922, | 1836.5303, | 33538,   | 2933804, | 1834.1771, | 33576,   | 2858636, | 1831.8239, |
| 4.589559 |          |            | 4.583678 |          |            | 4.577797 |          |            |
| 33501,   | 3021500, | 1836.4684, | 33539,   | 2930790, | 1834.1152, | 33577,   | 2852870, | 1831.7620, |
| 4.589404 |          |            | 4.583523 |          |            | 4.577643 |          |            |
| 33502,   | 3021958, | 1836.4065, | 33540,   | 2932670, | 1834.0533, | 33578,   | 2851484, | 1831.7000, |
| 4.589249 |          |            | 4.583369 |          |            | 4.577488 |          |            |
| 33503,   | 3023184, | 1836.3446, | 33541,   | 2934676, | 1833.9913, | 33579,   | 2849938, | 1831.6381, |
| 4.589095 |          |            | 4.583214 |          |            | 4.577333 |          |            |
| 33504,   | 3020428, | 1836.2826, | 33542,   | 2932276, | 1833.9294, | 33580,   | 2844344, | 1831.5762, |
| 4.588940 |          |            | 4.583059 |          |            | 4.577178 |          |            |
| 33505,   | 3014080, | 1836.2207, | 33543,   | 2926502, | 1833.8675, | 33581,   | 2836256, | 1831.5143, |
| 4.588785 |          |            | 4.582904 |          |            | 4.577023 |          |            |
| 33506,   | 3009116, | 1836.1588, | 33544,   | 2922578, | 1833.8056, | 33582,   | 2830758, | 1831.4523, |
| 4.588630 |          |            | 4.582750 |          |            | 4.576869 |          |            |
| 33507,   | 3008966, | 1836.0968, | 33545,   | 2923558, | 1833.7436, | 33583,   | 2830288, | 1831.3904, |
| 4.588476 |          |            | 4.582595 |          |            | 4.576714 |          |            |
| 33508,   | 3011236, | 1836.0349, | 33546,   | 2926620, | 1833.6817, | 33584,   | 2831664, | 1831.3285, |
| 4.588321 |          |            | 4.582440 |          |            | 4.576559 |          |            |
| 33509,   | 3010542, | 1835.9730, | 33547,   | 2926480, | 1833.6198, | 33585,   | 2829864, | 1831.2665, |
| 4.588166 |          |            | 4.582285 |          |            | 4.576404 |          |            |
| 33510,   | 3004982, | 1835.9111, | 33548,   | 2921732, | 1833.5578, | 33586,   | 2824038, | 1831.2046, |
| 4.588011 |          |            | 4.582130 |          |            | 4.576250 |          |            |
| 33511,   | 2998432, | 1835.8491, | 33549,   | 2916532, | 1833.4959, | 33587,   | 2818478, | 1831.1427, |
| 4.587857 |          |            | 4.581976 |          |            | 4.576095 |          |            |
| 33512,   | 2995888, | 1835.7872, | 33550,   | 2915592, | 1833.4340, | 33588,   | 2817394, | 1831.0808, |
| 4.587702 |          |            | 4.581821 |          |            | 4.575940 |          |            |
| 33513,   | 2997450, | 1835.7253, | 33551,   | 2918492, | 1833.3721, | 33589,   | 2819814, | 1831.0188, |
| 4.587547 |          |            | 4.581666 |          |            | 4.575785 |          |            |
| 33514,   | 2998250, | 1835.6634, | 33552,   | 2920136, | 1833.3101, | 33590,   | 2820644, | 1830.9569, |
| 4.587392 |          |            | 4.581511 |          |            | 4.575631 |          |            |
| 33515,   | 2994380, | 1835.6014, | 33553,   | 2916776, | 1833.2482, | 33591,   | 2816690, | 1830.8950, |
| 4.587237 |          |            | 4.581357 |          |            | 4.575476 |          |            |
| 33516,   | 2987664, | 1835.5395, | 33554,   | 2910364, | 1833.1863, | 33592,   | 2810364, | 1830.8331, |
| 4.587083 |          |            | 4.581202 |          |            | 4.575321 |          |            |
| 33517,   | 2983502, | 1835.4776, | 33555,   | 2906022, | 1833.1244, | 33593,   | 2806740, | 1830.7711, |
| 4.586928 |          |            | 4.581047 |          |            | 4.575166 |          |            |
| 33518,   | 2984286, | 1835.4157, | 33556,   | 2905822, | 1833.0624, | 33594,   | 2807436, | 1830.7092, |
| 4.586773 |          |            | 4.580892 |          |            | 4.575012 |          |            |
| 33519,   | 2986432, | 1835.3537, | 33557,   | 2906366, | 1833.0005, | 33595,   | 2808734, | 1830.6473, |
| 4.586618 |          |            | 4.580738 |          |            | 4.574857 |          |            |
| 33520,   | 2984588, | 1835.2918, | 33558,   | 2903062, | 1832.9386, | 33596,   | 2806066, | 1830.5854, |
| 4.586464 |          |            | 4.580583 |          |            | 4.574702 |          |            |
| 33521,   | 2978092, | 1835.2299, | 33559,   | 2895874, | 1832.8766, | 33597,   | 2799448, | 1830.5234, |
| 4.586309 |          |            | 4.580428 |          |            | 4.574547 |          |            |
| 33522,   | 2971902, | 1835.1679, | 33560,   | 2889568, | 1832.8147, | 33598,   | 2793418, | 1830.4615, |
| 4.586154 |          |            | 4.580273 |          |            | 4.574393 |          |            |
| 33523,   | 2970824, | 1835.1060, | 33561,   | 2888072, | 1832.7528, | 33599,   | 2791578, | 1830.3996, |
| 4.585999 |          |            | 4.580119 |          |            | 4.574238 |          |            |
| 33524,   | 2973894, | 1835.0441, | 33562,   | 2889808, | 1832.6909, | 33600,   | 2792412, | 1830.3376, |
| 4.585845 |          |            | 4.579964 |          |            | 4.574083 |          |            |
| 33525,   | 2975556, | 1834.9822, | 33563,   | 2889608, | 1832.6289, | 33601,   | 2791308, | 1830.2757, |
| 4.585690 |          |            | 4.579809 |          |            | 4.573928 |          |            |

|          |          |            |          |          |            |          |          |            |
|----------|----------|------------|----------|----------|------------|----------|----------|------------|
| 33602,   | 2786278, | 1830.2138, | 33640,   | 2691638, | 1827.8606, | 33678,   | 2606750, | 1825.5073, |
| 4.573774 |          |            | 4.567893 |          |            | 4.562012 |          |            |
| 33603,   | 2780392, | 1830.1519, | 33641,   | 2685000, | 1827.7986, | 33679,   | 2601072, | 1825.4454, |
| 4.573619 |          |            | 4.567738 |          |            | 4.561857 |          |            |
| 33604,   | 2777976, | 1830.0899, | 33642,   | 2681906, | 1827.7367, | 33680,   | 2598934, | 1825.3835, |
| 4.573464 |          |            | 4.567583 |          |            | 4.561702 |          |            |
| 33605,   | 2779216, | 1830.0280, | 33643,   | 2682368, | 1827.6748, | 33681,   | 2599594, | 1825.3216, |
| 4.573309 |          |            | 4.567429 |          |            | 4.561548 |          |            |
| 33606,   | 2779764, | 1829.9661, | 33644,   | 2682172, | 1827.6129, | 33682,   | 2598848, | 1825.2596, |
| 4.573155 |          |            | 4.567274 |          |            | 4.561393 |          |            |
| 33607,   | 2775862, | 1829.9042, | 33645,   | 2678036, | 1827.5509, | 33683,   | 2594116, | 1825.1977, |
| 4.573000 |          |            | 4.567119 |          |            | 4.561238 |          |            |
| 33608,   | 2768828, | 1829.8422, | 33646,   | 2671534, | 1827.4890, | 33684,   | 2587618, | 1825.1358, |
| 4.572845 |          |            | 4.566964 |          |            | 4.561083 |          |            |
| 33609,   | 2763518, | 1829.7803, | 33647,   | 2667096, | 1827.4271, | 33685,   | 2583690, | 1825.0739, |
| 4.572690 |          |            | 4.566809 |          |            | 4.560929 |          |            |
| 33610,   | 2762564, | 1829.7184, | 33648,   | 2666556, | 1827.3652, | 33686,   | 2583584, | 1825.0119, |
| 4.572536 |          |            | 4.566655 |          |            | 4.560774 |          |            |
| 33611,   | 2763290, | 1829.6564, | 33649,   | 2666906, | 1827.3032, | 33687,   | 2583948, | 1824.9500, |
| 4.572381 |          |            | 4.566500 |          |            | 4.560619 |          |            |
| 33612,   | 2761010, | 1829.5945, | 33650,   | 2663990, | 1827.2413, | 33688,   | 2580884, | 1824.8881, |
| 4.572226 |          |            | 4.566345 |          |            | 4.560464 |          |            |
| 33613,   | 2754706, | 1829.5326, | 33651,   | 2657690, | 1827.1794, | 33689,   | 2574678, | 1824.8262, |
| 4.572071 |          |            | 4.566190 |          |            | 4.560310 |          |            |
| 33614,   | 2748262, | 1829.4707, | 33652,   | 2652248, | 1827.1174, | 33690,   | 2569500, | 1824.7642, |
| 4.571916 |          |            | 4.566036 |          |            | 4.560155 |          |            |
| 33615,   | 2745820, | 1829.4087, | 33653,   | 2651304, | 1827.0555, | 33691,   | 2568400, | 1824.7023, |
| 4.571762 |          |            | 4.565881 |          |            | 4.560000 |          |            |
| 33616,   | 2746826, | 1829.3468, | 33654,   | 2653508, | 1826.9936, | 33692,   | 2569662, | 1824.6404, |
| 4.571607 |          |            | 4.565726 |          |            | 4.559845 |          |            |
| 33617,   | 2746748, | 1829.2849, | 33655,   | 2654034, | 1826.9317, | 33693,   | 2568866, | 1824.5784, |
| 4.571452 |          |            | 4.565571 |          |            | 4.559691 |          |            |
| 33618,   | 2742572, | 1829.2230, | 33656,   | 2650242, | 1826.8697, | 33694,   | 2564232, | 1824.5165, |
| 4.571297 |          |            | 4.565417 |          |            | 4.559536 |          |            |
| 33619,   | 2736420, | 1829.1610, | 33657,   | 2644718, | 1826.8078, | 33695,   | 2558796, | 1824.4546, |
| 4.571143 |          |            | 4.565262 |          |            | 4.559381 |          |            |
| 33620,   | 2732938, | 1829.0991, | 33658,   | 2642134, | 1826.7459, | 33696,   | 2556754, | 1824.3927, |
| 4.570988 |          |            | 4.565107 |          |            | 4.559226 |          |            |
| 33621,   | 2733622, | 1829.0372, | 33659,   | 2643650, | 1826.6840, | 33697,   | 2558344, | 1824.3307, |
| 4.570833 |          |            | 4.564952 |          |            | 4.559072 |          |            |
| 33622,   | 2734936, | 1828.9753, | 33660,   | 2645564, | 1826.6220, | 33698,   | 2559424, | 1824.2688, |
| 4.570678 |          |            | 4.564798 |          |            | 4.558917 |          |            |
| 33623,   | 2732516, | 1828.9133, | 33661,   | 2643740, | 1826.5601, | 33699,   | 2556296, | 1824.2069, |
| 4.570524 |          |            | 4.564643 |          |            | 4.558762 |          |            |
| 33624,   | 2726398, | 1828.8514, | 33662,   | 2638500, | 1826.4982, | 33700,   | 2550054, | 1824.1450, |
| 4.570369 |          |            | 4.564488 |          |            | 4.558607 |          |            |
| 33625,   | 2721002, | 1828.7895, | 33663,   | 2634084, | 1826.4363, | 33701,   | 2545336, | 1824.0830, |
| 4.570214 |          |            | 4.564333 |          |            | 4.558453 |          |            |
| 33626,   | 2719840, | 1828.7275, | 33664,   | 2633464, | 1826.3743, | 33702,   | 2544912, | 1824.0211, |
| 4.570059 |          |            | 4.564179 |          |            | 4.558298 |          |            |
| 33627,   | 2721360, | 1828.6656, | 33665,   | 2634724, | 1826.3124, | 33703,   | 2546594, | 1823.9592, |
| 4.569905 |          |            | 4.564024 |          |            | 4.558143 |          |            |
| 33628,   | 2720894, | 1828.6037, | 33666,   | 2633440, | 1826.2505, | 33704,   | 2546010, | 1823.8972, |
| 4.569750 |          |            | 4.563869 |          |            | 4.557988 |          |            |
| 33629,   | 2716390, | 1828.5418, | 33667,   | 2628160, | 1826.1885, | 33705,   | 2541846, | 1823.8353, |
| 4.569595 |          |            | 4.563714 |          |            | 4.557834 |          |            |
| 33630,   | 2710968, | 1828.4798, | 33668,   | 2622324, | 1826.1266, | 33706,   | 2537252, | 1823.7734, |
| 4.569440 |          |            | 4.563560 |          |            | 4.557679 |          |            |
| 33631,   | 2709176, | 1828.4179, | 33669,   | 2620324, | 1826.0647, | 33707,   | 2535826, | 1823.7115, |
| 4.569286 |          |            | 4.563405 |          |            | 4.557524 |          |            |
| 33632,   | 2711426, | 1828.3560, | 33670,   | 2622318, | 1826.0028, | 33708,   | 2537062, | 1823.6495, |
| 4.569131 |          |            | 4.563250 |          |            | 4.557369 |          |            |
| 33633,   | 2713266, | 1828.2941, | 33671,   | 2624024, | 1825.9408, | 33709,   | 2536858, | 1823.5876, |
| 4.568976 |          |            | 4.563095 |          |            | 4.557215 |          |            |
| 33634,   | 2710502, | 1828.2321, | 33672,   | 2621730, | 1825.8789, | 33710,   | 2532402, | 1823.5257, |
| 4.568821 |          |            | 4.562941 |          |            | 4.557060 |          |            |
| 33635,   | 2704046, | 1828.1702, | 33673,   | 2616534, | 1825.8170, | 33711,   | 2525606, | 1823.4638, |
| 4.568667 |          |            | 4.562786 |          |            | 4.556905 |          |            |
| 33636,   | 2698804, | 1828.1083, | 33674,   | 2612808, | 1825.7551, | 33712,   | 2520850, | 1823.4018, |
| 4.568512 |          |            | 4.562631 |          |            | 4.556750 |          |            |
| 33637,   | 2697896, | 1828.0463, | 33675,   | 2612838, | 1825.6931, | 33713,   | 2519832, | 1823.3399, |
| 4.568357 |          |            | 4.562476 |          |            | 4.556595 |          |            |
| 33638,   | 2699056, | 1827.9844, | 33676,   | 2614078, | 1825.6312, | 33714,   | 2519652, | 1823.2780, |
| 4.568202 |          |            | 4.562322 |          |            | 4.556441 |          |            |
| 33639,   | 2697492, | 1827.9225, | 33677,   | 2612300, | 1825.5693, | 33715,   | 2516456, | 1823.2161, |
| 4.568048 |          |            | 4.562167 |          |            | 4.556286 |          |            |

|          |          |            |          |          |            |          |          |            |
|----------|----------|------------|----------|----------|------------|----------|----------|------------|
| 33716,   | 2510210, | 1823.1541, | 33754,   | 2424386, | 1820.8009, | 33792,   | 2332266, | 1818.4477, |
| 4.556131 |          |            | 4.550250 |          |            | 4.544370 |          |            |
| 33717,   | 2504816, | 1823.0922, | 33755,   | 2419662, | 1820.7390, | 33793,   | 2328056, | 1818.3858, |
| 4.555976 |          |            | 4.550096 |          |            | 4.544215 |          |            |
| 33718,   | 2503440, | 1823.0303, | 33756,   | 2418802, | 1820.6770, | 33794,   | 2327852, | 1818.3238, |
| 4.555822 |          |            | 4.549941 |          |            | 4.544060 |          |            |
| 33719,   | 2504614, | 1822.9683, | 33757,   | 2419924, | 1820.6151, | 33795,   | 2329260, | 1818.2619, |
| 4.555667 |          |            | 4.549786 |          |            | 4.543905 |          |            |
| 33720,   | 2503970, | 1822.9064, | 33758,   | 2418730, | 1820.5532, | 33796,   | 2328014, | 1818.2000, |
| 4.555512 |          |            | 4.549631 |          |            | 4.543751 |          |            |
| 33721,   | 2499422, | 1822.8445, | 33759,   | 2413606, | 1820.4913, | 33797,   | 2322942, | 1818.1380, |
| 4.555357 |          |            | 4.549477 |          |            | 4.543596 |          |            |
| 33722,   | 2493724, | 1822.7826, | 33760,   | 2407512, | 1820.4293, | 33798,   | 2317310, | 1818.0761, |
| 4.555203 |          |            | 4.549322 |          |            | 4.543441 |          |            |
| 33723,   | 2491210, | 1822.7206, | 33761,   | 2404438, | 1820.3674, | 33799,   | 2314944, | 1818.0142, |
| 4.555048 |          |            | 4.549167 |          |            | 4.543286 |          |            |
| 33724,   | 2492622, | 1822.6587, | 33762,   | 2404734, | 1820.3055, | 33800,   | 2315742, | 1817.9523, |
| 4.554893 |          |            | 4.549012 |          |            | 4.543132 |          |            |
| 33725,   | 2494190, | 1822.5968, | 33763,   | 2404774, | 1820.2436, | 33801,   | 2315864, | 1817.8903, |
| 4.554738 |          |            | 4.548858 |          |            | 4.542977 |          |            |
| 33726,   | 2492018, | 1822.5349, | 33764,   | 2401396, | 1820.1816, | 33802,   | 2312364, | 1817.8284, |
| 4.554584 |          |            | 4.548703 |          |            | 4.542822 |          |            |
| 33727,   | 2486636, | 1822.4729, | 33765,   | 2395706, | 1820.1197, | 33803,   | 2306644, | 1817.7665, |
| 4.554429 |          |            | 4.548548 |          |            | 4.542667 |          |            |
| 33728,   | 2482212, | 1822.4110, | 33766,   | 2391684, | 1820.0578, | 33804,   | 2302736, | 1817.7046, |
| 4.554274 |          |            | 4.548393 |          |            | 4.542513 |          |            |
| 33729,   | 2481536, | 1822.3491, | 33767,   | 2391314, | 1819.9959, | 33805,   | 2302476, | 1817.6426, |
| 4.554119 |          |            | 4.548239 |          |            | 4.542358 |          |            |
| 33730,   | 2482680, | 1822.2871, | 33768,   | 2392174, | 1819.9339, | 33806,   | 2303368, | 1817.5807, |
| 4.553965 |          |            | 4.548084 |          |            | 4.542203 |          |            |
| 33731,   | 2481414, | 1822.2252, | 33769,   | 2390314, | 1819.8720, | 33807,   | 2301672, | 1817.5188, |
| 4.553810 |          |            | 4.547929 |          |            | 4.542048 |          |            |
| 33732,   | 2476332, | 1822.1633, | 33770,   | 2385058, | 1819.8101, | 33808,   | 2296908, | 1817.4568, |
| 4.553655 |          |            | 4.547774 |          |            | 4.541893 |          |            |
| 33733,   | 2470606, | 1822.1014, | 33771,   | 2379864, | 1819.7481, | 33809,   | 2292394, | 1817.3949, |
| 4.553500 |          |            | 4.547620 |          |            | 4.541739 |          |            |
| 33734,   | 2468208, | 1822.0394, | 33772,   | 2378218, | 1819.6862, | 33810,   | 2291198, | 1817.3330, |
| 4.553346 |          |            | 4.547465 |          |            | 4.541584 |          |            |
| 33735,   | 2469190, | 1821.9775, | 33773,   | 2379456, | 1819.6243, | 33811,   | 2292432, | 1817.2711, |
| 4.553191 |          |            | 4.547310 |          |            | 4.541429 |          |            |
| 33736,   | 2469646, | 1821.9156, | 33774,   | 2379542, | 1819.5624, | 33812,   | 2292290, | 1817.2091, |
| 4.553036 |          |            | 4.547155 |          |            | 4.541274 |          |            |
| 33737,   | 2466362, | 1821.8537, | 33775,   | 2375838, | 1819.5004, | 33813,   | 2288548, | 1817.1472, |
| 4.552881 |          |            | 4.547000 |          |            | 4.541120 |          |            |
| 33738,   | 2460580, | 1821.7917, | 33776,   | 2370196, | 1819.4385, | 33814,   | 2283110, | 1817.0853, |
| 4.552727 |          |            | 4.546846 |          |            | 4.540965 |          |            |
| 33739,   | 2456396, | 1821.7298, | 33777,   | 2366674, | 1819.3766, | 33815,   | 2279556, | 1817.0234, |
| 4.552572 |          |            | 4.546691 |          |            | 4.540810 |          |            |
| 33740,   | 2455794, | 1821.6679, | 33778,   | 2366654, | 1819.3147, | 33816,   | 2278786, | 1816.9614, |
| 4.552417 |          |            | 4.546536 |          |            | 4.540655 |          |            |
| 33741,   | 2456326, | 1821.6060, | 33779,   | 2367252, | 1819.2527, | 33817,   | 2278018, | 1816.8995, |
| 4.552262 |          |            | 4.546381 |          |            | 4.540501 |          |            |
| 33742,   | 2454172, | 1821.5440, | 33780,   | 2364872, | 1819.1908, | 33818,   | 2274376, | 1816.8376, |
| 4.552108 |          |            | 4.546227 |          |            | 4.540346 |          |            |
| 33743,   | 2448854, | 1821.4821, | 33781,   | 2359610, | 1819.1289, | 33819,   | 2268614, | 1816.7757, |
| 4.551953 |          |            | 4.546072 |          |            | 4.540191 |          |            |
| 33744,   | 2443872, | 1821.4202, | 33782,   | 2355182, | 1819.0669, | 33820,   | 2264404, | 1816.7137, |
| 4.551798 |          |            | 4.545917 |          |            | 4.540036 |          |            |
| 33745,   | 2442488, | 1821.3582, | 33783,   | 2354444, | 1819.0050, | 33821,   | 2263992, | 1816.6518, |
| 4.551643 |          |            | 4.545762 |          |            | 4.539882 |          |            |
| 33746,   | 2443808, | 1821.2963, | 33784,   | 2355910, | 1818.9431, | 33822,   | 2265440, | 1816.5899, |
| 4.551488 |          |            | 4.545608 |          |            | 4.539727 |          |            |
| 33747,   | 2443832, | 1821.2344, | 33785,   | 2355456, | 1818.8812, | 33823,   | 2264838, | 1816.5279, |
| 4.551334 |          |            | 4.545453 |          |            | 4.539572 |          |            |
| 33748,   | 2440254, | 1821.1725, | 33786,   | 2351190, | 1818.8192, | 33824,   | 2260868, | 1816.4660, |
| 4.551179 |          |            | 4.545298 |          |            | 4.539417 |          |            |
| 33749,   | 2435162, | 1821.1105, | 33787,   | 2345608, | 1818.7573, | 33825,   | 2256286, | 1816.4041, |
| 4.551024 |          |            | 4.545143 |          |            | 4.539263 |          |            |
| 33750,   | 2432418, | 1821.0486, | 33788,   | 2342522, | 1818.6954, | 33826,   | 2254538, | 1816.3422, |
| 4.550869 |          |            | 4.544989 |          |            | 4.539108 |          |            |
| 33751,   | 2432890, | 1820.9867, | 33789,   | 2342450, | 1818.6335, | 33827,   | 2255568, | 1816.2802, |
| 4.550715 |          |            | 4.544834 |          |            | 4.538953 |          |            |
| 33752,   | 2433324, | 1820.9248, | 33790,   | 2342048, | 1818.5715, | 33828,   | 2255856, | 1816.2183, |
| 4.550560 |          |            | 4.544679 |          |            | 4.538798 |          |            |
| 33753,   | 2430286, | 1820.8628, | 33791,   | 2338290, | 1818.5096, | 33829,   | 2252640, | 1816.1564, |
| 4.550405 |          |            | 4.544524 |          |            | 4.538644 |          |            |

|          |          |            |          |          |            |          |          |            |
|----------|----------|------------|----------|----------|------------|----------|----------|------------|
| 33830,   | 2247240, | 1816.0945, | 33868,   | 2162018, | 1813.7412, | 33906,   | 2079426, | 1811.3880, |
| 4.538489 |          |            | 4.532608 |          |            | 4.526727 |          |            |
| 33831,   | 2243490, | 1816.0325, | 33869,   | 2159362, | 1813.6793, | 33907,   | 2076200, | 1811.3261, |
| 4.538334 |          |            | 4.532453 |          |            | 4.526572 |          |            |
| 33832,   | 2243196, | 1815.9706, | 33870,   | 2159982, | 1813.6174, | 33908,   | 2076266, | 1811.2642, |
| 4.538179 |          |            | 4.532299 |          |            | 4.526418 |          |            |
| 33833,   | 2244050, | 1815.9087, | 33871,   | 2161094, | 1813.5555, | 33909,   | 2076472, | 1811.2022, |
| 4.538025 |          |            | 4.532144 |          |            | 4.526263 |          |            |
| 33834,   | 2242506, | 1815.8467, | 33872,   | 2159022, | 1813.4935, | 33910,   | 2073514, | 1811.1403, |
| 4.537870 |          |            | 4.531989 |          |            | 4.526108 |          |            |
| 33835,   | 2238058, | 1815.7848, | 33873,   | 2153524, | 1813.4316, | 33911,   | 2067794, | 1811.0784, |
| 4.537715 |          |            | 4.531834 |          |            | 4.525953 |          |            |
| 33836,   | 2233798, | 1815.7229, | 33874,   | 2148038, | 1813.3697, | 33912,   | 2062896, | 1811.0165, |
| 4.537560 |          |            | 4.531679 |          |            | 4.525799 |          |            |
| 33837,   | 2232528, | 1815.6610, | 33875,   | 2145646, | 1813.3077, | 33913,   | 2061310, | 1810.9545, |
| 4.537406 |          |            | 4.531525 |          |            | 4.525644 |          |            |
| 33838,   | 2233254, | 1815.5990, | 33876,   | 2145536, | 1813.2458, | 33914,   | 2061492, | 1810.8926, |
| 4.537251 |          |            | 4.531370 |          |            | 4.525489 |          |            |
| 33839,   | 2232250, | 1815.5371, | 33877,   | 2144216, | 1813.1839, | 33915,   | 2059848, | 1810.8307, |
| 4.537096 |          |            | 4.531215 |          |            | 4.525334 |          |            |
| 33840,   | 2227564, | 1815.4752, | 33878,   | 2139856, | 1813.1220, | 33916,   | 2055114, | 1810.7687, |
| 4.536941 |          |            | 4.531060 |          |            | 4.525180 |          |            |
| 33841,   | 2221500, | 1815.4133, | 33879,   | 2134510, | 1813.0600, | 33917,   | 2049980, | 1810.7068, |
| 4.536786 |          |            | 4.530906 |          |            | 4.525025 |          |            |
| 33842,   | 2217998, | 1815.3513, | 33880,   | 2131564, | 1812.9981, | 33918,   | 2047916, | 1810.6449, |
| 4.536632 |          |            | 4.530751 |          |            | 4.524870 |          |            |
| 33843,   | 2218022, | 1815.2894, | 33881,   | 2131566, | 1812.9362, | 33919,   | 2049036, | 1810.5830, |
| 4.536477 |          |            | 4.530596 |          |            | 4.524715 |          |            |
| 33844,   | 2218430, | 1815.2275, | 33882,   | 2131504, | 1812.8743, | 33920,   | 2049950, | 1810.5210, |
| 4.536322 |          |            | 4.530441 |          |            | 4.524561 |          |            |
| 33845,   | 2215702, | 1815.1656, | 33883,   | 2128488, | 1812.8123, | 33921,   | 2047710, | 1810.4591, |
| 4.536167 |          |            | 4.530287 |          |            | 4.524406 |          |            |
| 33846,   | 2210108, | 1815.1036, | 33884,   | 2123334, | 1812.7504, | 33922,   | 2043220, | 1810.3972, |
| 4.536013 |          |            | 4.530132 |          |            | 4.524251 |          |            |
| 33847,   | 2205360, | 1815.0417, | 33885,   | 2119736, | 1812.6885, | 33923,   | 2039990, | 1810.3353, |
| 4.535858 |          |            | 4.529977 |          |            | 4.524096 |          |            |
| 33848,   | 2204208, | 1814.9798, | 33886,   | 2119904, | 1812.6266, | 33924,   | 2039868, | 1810.2733, |
| 4.535703 |          |            | 4.529822 |          |            | 4.523942 |          |            |
| 33849,   | 2205204, | 1814.9178, | 33887,   | 2121914, | 1812.5646, | 33925,   | 2040806, | 1810.2114, |
| 4.535548 |          |            | 4.529668 |          |            | 4.523787 |          |            |
| 33850,   | 2204492, | 1814.8559, | 33888,   | 2121850, | 1812.5027, | 33926,   | 2039388, | 1810.1495, |
| 4.535394 |          |            | 4.529513 |          |            | 4.523632 |          |            |
| 33851,   | 2200408, | 1814.7940, | 33889,   | 2118290, | 1812.4408, | 33927,   | 2034930, | 1810.0875, |
| 4.535239 |          |            | 4.529358 |          |            | 4.523477 |          |            |
| 33852,   | 2195348, | 1814.7321, | 33890,   | 2113774, | 1812.3788, | 33928,   | 2030290, | 1810.0256, |
| 4.535084 |          |            | 4.529203 |          |            | 4.523323 |          |            |
| 33853,   | 2192768, | 1814.6701, | 33891,   | 2111602, | 1812.3169, | 33929,   | 2028352, | 1809.9637, |
| 4.534929 |          |            | 4.529049 |          |            | 4.523168 |          |            |
| 33854,   | 2192946, | 1814.6082, | 33892,   | 2111922, | 1812.2550, | 33930,   | 2028550, | 1809.9018, |
| 4.534775 |          |            | 4.528894 |          |            | 4.523013 |          |            |
| 33855,   | 2192718, | 1814.5463, | 33893,   | 2111698, | 1812.1931, | 33931,   | 2027592, | 1809.8398, |
| 4.534620 |          |            | 4.528739 |          |            | 4.522858 |          |            |
| 33856,   | 2189438, | 1814.4844, | 33894,   | 2108550, | 1812.1311, | 33932,   | 2023512, | 1809.7779, |
| 4.534465 |          |            | 4.528584 |          |            | 4.522704 |          |            |
| 33857,   | 2184338, | 1814.4224, | 33895,   | 2103712, | 1812.0692, | 33933,   | 2018206, | 1809.7160, |
| 4.534310 |          |            | 4.528430 |          |            | 4.522549 |          |            |
| 33858,   | 2181146, | 1814.3605, | 33896,   | 2100508, | 1812.0073, | 33934,   | 2015228, | 1809.6541, |
| 4.534156 |          |            | 4.528275 |          |            | 4.522394 |          |            |
| 33859,   | 2181530, | 1814.2986, | 33897,   | 2100308, | 1811.9454, | 33935,   | 2015576, | 1809.5921, |
| 4.534001 |          |            | 4.528120 |          |            | 4.522239 |          |            |
| 33860,   | 2182890, | 1814.2366, | 33898,   | 2100832, | 1811.8834, | 33936,   | 2016460, | 1809.5302, |
| 4.533846 |          |            | 4.527965 |          |            | 4.522085 |          |            |
| 33861,   | 2181252, | 1814.1747, | 33899,   | 2098954, | 1811.8215, | 33937,   | 2014614, | 1809.4683, |
| 4.533691 |          |            | 4.527811 |          |            | 4.521930 |          |            |
| 33862,   | 2175904, | 1814.1128, | 33900,   | 2094560, | 1811.7596, | 33938,   | 2010178, | 1809.4064, |
| 4.533537 |          |            | 4.527656 |          |            | 4.521775 |          |            |
| 33863,   | 2170304, | 1814.0509, | 33901,   | 2090712, | 1811.6976, | 33939,   | 2006534, | 1809.3444, |
| 4.533382 |          |            | 4.527501 |          |            | 4.521620 |          |            |
| 33864,   | 2168130, | 1813.9889, | 33902,   | 2089876, | 1811.6357, | 33940,   | 2006248, | 1809.2825, |
| 4.533227 |          |            | 4.527346 |          |            | 4.521465 |          |            |
| 33865,   | 2169098, | 1813.9270, | 33903,   | 2090782, | 1811.5738, | 33941,   | 2007956, | 1809.2206, |
| 4.533072 |          |            | 4.527192 |          |            | 4.521311 |          |            |
| 33866,   | 2169492, | 1813.8651, | 33904,   | 2089786, | 1811.5119, | 33942,   | 2007898, | 1809.1586, |
| 4.532918 |          |            | 4.527037 |          |            | 4.521156 |          |            |
| 33867,   | 2166634, | 1813.8032, | 33905,   | 2085204, | 1811.4499, | 33943,   | 2004300, | 1809.0967, |
| 4.532763 |          |            | 4.526882 |          |            | 4.521001 |          |            |

|          |          |            |          |          |            |          |          |            |
|----------|----------|------------|----------|----------|------------|----------|----------|------------|
| 33944,   | 1999356, | 1809.0348, | 33982,   | 1920040, | 1806.6816, | 34020,   | 1837832, | 1804.3283, |
| 4.520846 |          |            | 4.514966 |          |            | 4.509085 |          |            |
| 33945,   | 1996534, | 1808.9729, | 33983,   | 1918172, | 1806.6196, | 34021,   | 1835598, | 1804.2664, |
| 4.520692 |          |            | 4.514811 |          |            | 4.508930 |          |            |
| 33946,   | 1996466, | 1808.9109, | 33984,   | 1919028, | 1806.5577, | 34022,   | 1835786, | 1804.2045, |
| 4.520537 |          |            | 4.514656 |          |            | 4.508775 |          |            |
| 33947,   | 1996312, | 1808.8490, | 33985,   | 1919266, | 1806.4958, | 34023,   | 1835484, | 1804.1426, |
| 4.520382 |          |            | 4.514501 |          |            | 4.508621 |          |            |
| 33948,   | 1993322, | 1808.7871, | 33986,   | 1916366, | 1806.4339, | 34024,   | 1832744, | 1804.0806, |
| 4.520227 |          |            | 4.514347 |          |            | 4.508466 |          |            |
| 33949,   | 1988176, | 1808.7252, | 33987,   | 1911602, | 1806.3719, | 34025,   | 1828988, | 1804.0187, |
| 4.520073 |          |            | 4.514192 |          |            | 4.508311 |          |            |
| 33950,   | 1984190, | 1808.6632, | 33988,   | 1908488, | 1806.3100, | 34026,   | 1827268, | 1803.9568, |
| 4.519918 |          |            | 4.514037 |          |            | 4.508156 |          |            |
| 33951,   | 1983250, | 1808.6013, | 33989,   | 1908570, | 1806.2481, | 34027,   | 1828434, | 1803.8949, |
| 4.519763 |          |            | 4.513882 |          |            | 4.508002 |          |            |
| 33952,   | 1983528, | 1808.5394, | 33990,   | 1909548, | 1806.1862, | 34028,   | 1829982, | 1803.8329, |
| 4.519608 |          |            | 4.513728 |          |            | 4.507847 |          |            |
| 33953,   | 1981668, | 1808.4774, | 33991,   | 1908018, | 1806.1242, | 34029,   | 1828954, | 1803.7710, |
| 4.519454 |          |            | 4.513573 |          |            | 4.507692 |          |            |
| 33954,   | 1976906, | 1808.4155, | 33992,   | 1903480, | 1806.0623, | 34030,   | 1825472, | 1803.7091, |
| 4.519299 |          |            | 4.513418 |          |            | 4.507537 |          |            |
| 33955,   | 1972046, | 1808.3536, | 33993,   | 1898892, | 1806.0004, | 34031,   | 1822592, | 1803.6471, |
| 4.519144 |          |            | 4.513263 |          |            | 4.507383 |          |            |
| 33956,   | 1970190, | 1808.2917, | 33994,   | 1897106, | 1805.9384, | 34032,   | 1822566, | 1803.5852, |
| 4.518989 |          |            | 4.513109 |          |            | 4.507228 |          |            |
| 33957,   | 1971084, | 1808.2297, | 33995,   | 1897490, | 1805.8765, | 34033,   | 1824040, | 1803.5233, |
| 4.518835 |          |            | 4.512954 |          |            | 4.507073 |          |            |
| 33958,   | 1971452, | 1808.1678, | 33996,   | 1896744, | 1805.8146, | 34034,   | 1823500, | 1803.4614, |
| 4.518680 |          |            | 4.512799 |          |            | 4.506918 |          |            |
| 33959,   | 1968928, | 1808.1059, | 33997,   | 1892932, | 1805.7527, | 34035,   | 1819376, | 1803.3994, |
| 4.518525 |          |            | 4.512644 |          |            | 4.506763 |          |            |
| 33960,   | 1964840, | 1808.0440, | 33998,   | 1887834, | 1805.6907, | 34036,   | 1813938, | 1803.3375, |
| 4.518370 |          |            | 4.512490 |          |            | 4.506609 |          |            |
| 33961,   | 1962514, | 1807.9820, | 33999,   | 1884818, | 1805.6288, | 34037,   | 1810704, | 1803.2756, |
| 4.518216 |          |            | 4.512335 |          |            | 4.506454 |          |            |
| 33962,   | 1963168, | 1807.9201, | 34000,   | 1884792, | 1805.5669, | 34038,   | 1810456, | 1803.2137, |
| 4.518061 |          |            | 4.512180 |          |            | 4.506299 |          |            |
| 33963,   | 1964310, | 1807.8582, | 34001,   | 1885152, | 1805.5050, | 34039,   | 1810548, | 1803.1517, |
| 4.517906 |          |            | 4.512025 |          |            | 4.506144 |          |            |
| 33964,   | 1962626, | 1807.7963, | 34002,   | 1882898, | 1805.4430, | 34040,   | 1808206, | 1803.0898, |
| 4.517751 |          |            | 4.511871 |          |            | 4.505990 |          |            |
| 33965,   | 1957830, | 1807.7343, | 34003,   | 1878234, | 1805.3811, | 34041,   | 1803850, | 1803.0279, |
| 4.517597 |          |            | 4.511716 |          |            | 4.505835 |          |            |
| 33966,   | 1952962, | 1807.6724, | 34004,   | 1874258, | 1805.3192, | 34042,   | 1800458, | 1802.9660, |
| 4.517442 |          |            | 4.511561 |          |            | 4.505680 |          |            |
| 33967,   | 1950774, | 1807.6105, | 34005,   | 1873180, | 1805.2572, | 34043,   | 1799828, | 1802.9040, |
| 4.517287 |          |            | 4.511406 |          |            | 4.505525 |          |            |
| 33968,   | 1950570, | 1807.5485, | 34006,   | 1873570, | 1805.1953, | 34044,   | 1800328, | 1802.8421, |
| 4.517132 |          |            | 4.511251 |          |            | 4.505371 |          |            |
| 33969,   | 1949278, | 1807.4866, | 34007,   | 1872036, | 1805.1334, | 34045,   | 1798870, | 1802.7802, |
| 4.516978 |          |            | 4.511097 |          |            | 4.505216 |          |            |
| 33970,   | 1945334, | 1807.4247, | 34008,   | 1867290, | 1805.0715, | 34046,   | 1794756, | 1802.7182, |
| 4.516823 |          |            | 4.510942 |          |            | 4.505061 |          |            |
| 33971,   | 1940698, | 1807.3628, | 34009,   | 1861754, | 1805.0095, | 34047,   | 1790676, | 1802.6563, |
| 4.516668 |          |            | 4.510787 |          |            | 4.504906 |          |            |
| 33972,   | 1938470, | 1807.3008, | 34010,   | 1858738, | 1804.9476, | 34048,   | 1789638, | 1802.5944, |
| 4.516513 |          |            | 4.510632 |          |            | 4.504752 |          |            |
| 33973,   | 1939118, | 1807.2389, | 34011,   | 1858628, | 1804.8857, | 34049,   | 1791396, | 1802.5325, |
| 4.516358 |          |            | 4.510478 |          |            | 4.504597 |          |            |
| 33974,   | 1939822, | 1807.1770, | 34012,   | 1858520, | 1804.8238, | 34050,   | 1792666, | 1802.4705, |
| 4.516204 |          |            | 4.510323 |          |            | 4.504442 |          |            |
| 33975,   | 1937812, | 1807.1151, | 34013,   | 1855784, | 1804.7618, | 34051,   | 1790870, | 1802.4086, |
| 4.516049 |          |            | 4.510168 |          |            | 4.504287 |          |            |
| 33976,   | 1933662, | 1807.0531, | 34014,   | 1851216, | 1804.6999, | 34052,   | 1787002, | 1802.3467, |
| 4.515894 |          |            | 4.510013 |          |            | 4.504133 |          |            |
| 33977,   | 1930512, | 1806.9912, | 34015,   | 1848016, | 1804.6380, | 34053,   | 1784260, | 1802.2848, |
| 4.515739 |          |            | 4.509859 |          |            | 4.503978 |          |            |
| 33978,   | 1930196, | 1806.9293, | 34016,   | 1847818, | 1804.5761, | 34054,   | 1784158, | 1802.2228, |
| 4.515585 |          |            | 4.509704 |          |            | 4.503823 |          |            |
| 33979,   | 1930930, | 1806.8673, | 34017,   | 1848652, | 1804.5141, | 34055,   | 1784784, | 1802.1609, |
| 4.515430 |          |            | 4.509549 |          |            | 4.503668 |          |            |
| 33980,   | 1929406, | 1806.8054, | 34018,   | 1847188, | 1804.4522, | 34056,   | 1783234, | 1802.0990, |
| 4.515275 |          |            | 4.509394 |          |            | 4.503514 |          |            |
| 33981,   | 1924842, | 1806.7435, | 34019,   | 1842678, | 1804.3903, | 34057,   | 1779208, | 1802.0370, |
| 4.515120 |          |            | 4.509240 |          |            | 4.503359 |          |            |

|          |          |            |          |          |            |          |          |            |
|----------|----------|------------|----------|----------|------------|----------|----------|------------|
| 34058,   | 1775424, | 1801.9751, | 34096,   | 1702996, | 1799.6219, | 34134,   | 1630804, | 1797.2687, |
| 4.503204 |          |            | 4.497323 |          |            | 4.491442 |          |            |
| 34059,   | 1774340, | 1801.9132, | 34097,   | 1701582, | 1799.5600, | 34135,   | 1629596, | 1797.2068, |
| 4.503049 |          |            | 4.497169 |          |            | 4.491288 |          |            |
| 34060,   | 1775198, | 1801.8513, | 34098,   | 1701620, | 1799.4980, | 34136,   | 1629730, | 1797.1448, |
| 4.502895 |          |            | 4.497014 |          |            | 4.491133 |          |            |
| 34061,   | 1774926, | 1801.7893, | 34099,   | 1700154, | 1799.4361, | 34137,   | 1628484, | 1797.0829, |
| 4.502740 |          |            | 4.496859 |          |            | 4.490978 |          |            |
| 34062,   | 1771778, | 1801.7274, | 34100,   | 1696044, | 1799.3742, | 34138,   | 1625022, | 1797.0210, |
| 4.502585 |          |            | 4.496704 |          |            | 4.490823 |          |            |
| 34063,   | 1767386, | 1801.6655, | 34101,   | 1691448, | 1799.3123, | 34139,   | 1621446, | 1796.9590, |
| 4.502430 |          |            | 4.496549 |          |            | 4.490669 |          |            |
| 34064,   | 1764712, | 1801.6036, | 34102,   | 1689282, | 1799.2503, | 34140,   | 1620238, | 1796.8971, |
| 4.502276 |          |            | 4.496395 |          |            | 4.490514 |          |            |
| 34065,   | 1764468, | 1801.5416, | 34103,   | 1689746, | 1799.1884, | 34141,   | 1621168, | 1796.8352, |
| 4.502121 |          |            | 4.496240 |          |            | 4.490359 |          |            |
| 34066,   | 1764312, | 1801.4797, | 34104,   | 1690082, | 1799.1265, | 34142,   | 1621450, | 1796.7733, |
| 4.501966 |          |            | 4.496085 |          |            | 4.490204 |          |            |
| 34067,   | 1761804, | 1801.4178, | 34105,   | 1687898, | 1799.0646, | 34143,   | 1618980, | 1796.7113, |
| 4.501811 |          |            | 4.495930 |          |            | 4.490050 |          |            |
| 34068,   | 1757470, | 1801.3559, | 34106,   | 1684038, | 1799.0026, | 34144,   | 1614790, | 1796.6494, |
| 4.501656 |          |            | 4.495776 |          |            | 4.489895 |          |            |
| 34069,   | 1754222, | 1801.2939, | 34107,   | 1681576, | 1798.9407, | 34145,   | 1611768, | 1796.5875, |
| 4.501502 |          |            | 4.495621 |          |            | 4.489740 |          |            |
| 34070,   | 1753784, | 1801.2320, | 34108,   | 1682060, | 1798.8788, | 34146,   | 1611176, | 1796.5256, |
| 4.501347 |          |            | 4.495466 |          |            | 4.489585 |          |            |
| 34071,   | 1754480, | 1801.1701, | 34109,   | 1683580, | 1798.8169, | 34147,   | 1611180, | 1796.4636, |
| 4.501192 |          |            | 4.495311 |          |            | 4.489431 |          |            |
| 34072,   | 1753158, | 1801.1081, | 34110,   | 1682966, | 1798.7549, | 34148,   | 1609158, | 1796.4017, |
| 4.501037 |          |            | 4.495157 |          |            | 4.489276 |          |            |
| 34073,   | 1748970, | 1801.0462, | 34111,   | 1679532, | 1798.6930, | 34149,   | 1604922, | 1796.3398, |
| 4.500883 |          |            | 4.495002 |          |            | 4.489121 |          |            |
| 34074,   | 1744542, | 1800.9843, | 34112,   | 1675840, | 1798.6311, | 34150,   | 1601014, | 1796.2778, |
| 4.500728 |          |            | 4.494847 |          |            | 4.488966 |          |            |
| 34075,   | 1742980, | 1800.9224, | 34113,   | 1674612, | 1798.5691, | 34151,   | 1599646, | 1796.2159, |
| 4.500573 |          |            | 4.494692 |          |            | 4.488812 |          |            |
| 34076,   | 1744262, | 1800.8604, | 34114,   | 1675406, | 1798.5072, | 34152,   | 1600018, | 1796.1540, |
| 4.500418 |          |            | 4.494538 |          |            | 4.488657 |          |            |
| 34077,   | 1745250, | 1800.7985, | 34115,   | 1675128, | 1798.4453, | 34153,   | 1599298, | 1796.0921, |
| 4.500264 |          |            | 4.494383 |          |            | 4.488502 |          |            |
| 34078,   | 1743298, | 1800.7366, | 34116,   | 1671722, | 1798.3834, | 34154,   | 1596092, | 1796.0301, |
| 4.500109 |          |            | 4.494228 |          |            | 4.488347 |          |            |
| 34079,   | 1739254, | 1800.6747, | 34117,   | 1666694, | 1798.3214, | 34155,   | 1592192, | 1795.9682, |
| 4.499954 |          |            | 4.494073 |          |            | 4.488193 |          |            |
| 34080,   | 1736274, | 1800.6127, | 34118,   | 1663370, | 1798.2595, | 34156,   | 1590478, | 1795.9063, |
| 4.499799 |          |            | 4.493919 |          |            | 4.488038 |          |            |
| 34081,   | 1735968, | 1800.5508, | 34119,   | 1662994, | 1798.1976, | 34157,   | 1591388, | 1795.8444, |
| 4.499645 |          |            | 4.493764 |          |            | 4.487883 |          |            |
| 34082,   | 1736518, | 1800.4889, | 34120,   | 1663268, | 1798.1357, | 34158,   | 1592290, | 1795.7824, |
| 4.499490 |          |            | 4.493609 |          |            | 4.487728 |          |            |
| 34083,   | 1734932, | 1800.4270, | 34121,   | 1661086, | 1798.0737, | 34159,   | 1590492, | 1795.7205, |
| 4.499335 |          |            | 4.493454 |          |            | 4.487574 |          |            |
| 34084,   | 1730698, | 1800.3650, | 34122,   | 1656228, | 1798.0118, | 34160,   | 1586380, | 1795.6586, |
| 4.499180 |          |            | 4.493300 |          |            | 4.487419 |          |            |
| 34085,   | 1726424, | 1800.3031, | 34123,   | 1651650, | 1797.9499, | 34161,   | 1582926, | 1795.5967, |
| 4.499026 |          |            | 4.493145 |          |            | 4.487264 |          |            |
| 34086,   | 1724684, | 1800.2412, | 34124,   | 1650018, | 1797.8879, | 34162,   | 1582144, | 1795.5347, |
| 4.498871 |          |            | 4.492990 |          |            | 4.487109 |          |            |
| 34087,   | 1724922, | 1800.1792, | 34125,   | 1650664, | 1797.8260, | 34163,   | 1582716, | 1795.4728, |
| 4.498716 |          |            | 4.492835 |          |            | 4.486955 |          |            |
| 34088,   | 1724150, | 1800.1173, | 34126,   | 1650464, | 1797.7641, | 34164,   | 1581630, | 1795.4109, |
| 4.498561 |          |            | 4.492681 |          |            | 4.486800 |          |            |
| 34089,   | 1720584, | 1800.0554, | 34127,   | 1647572, | 1797.7022, | 34165,   | 1577838, | 1795.3489, |
| 4.498407 |          |            | 4.492526 |          |            | 4.486645 |          |            |
| 34090,   | 1715824, | 1799.9935, | 34128,   | 1643472, | 1797.6402, | 34166,   | 1573566, | 1795.2870, |
| 4.498252 |          |            | 4.492371 |          |            | 4.486490 |          |            |
| 34091,   | 1712994, | 1799.9315, | 34129,   | 1641068, | 1797.5783, | 34167,   | 1571724, | 1795.2251, |
| 4.498097 |          |            | 4.492216 |          |            | 4.486335 |          |            |
| 34092,   | 1712992, | 1799.8696, | 34130,   | 1641084, | 1797.5164, | 34168,   | 1572436, | 1795.1632, |
| 4.497942 |          |            | 4.492062 |          |            | 4.486181 |          |            |
| 34093,   | 1713410, | 1799.8077, | 34131,   | 1641216, | 1797.4545, | 34169,   | 1572934, | 1795.1012, |
| 4.497788 |          |            | 4.491907 |          |            | 4.486026 |          |            |
| 34094,   | 1711388, | 1799.7458, | 34132,   | 1638932, | 1797.3925, | 34170,   | 1570848, | 1795.0393, |
| 4.497633 |          |            | 4.491752 |          |            | 4.485871 |          |            |
| 34095,   | 1706976, | 1799.6838, | 34133,   | 1634542, | 1797.3306, | 34171,   | 1567002, | 1794.9774, |
| 4.497478 |          |            | 4.491597 |          |            | 4.485716 |          |            |

|          |          |            |          |          |            |          |          |            |
|----------|----------|------------|----------|----------|------------|----------|----------|------------|
| 34172,   | 1564324, | 1794.9155, | 34210,   | 1493454, | 1792.5622, | 34248,   | 1432564, | 1790.2090, |
| 4.485562 |          |            | 4.479681 |          |            | 4.473800 |          |            |
| 34173,   | 1564266, | 1794.8535, | 34211,   | 1493622, | 1792.5003, | 34249,   | 1432830, | 1790.1471, |
| 4.485407 |          |            | 4.479526 |          |            | 4.473645 |          |            |
| 34174,   | 1565004, | 1794.7916, | 34212,   | 1494182, | 1792.4384, | 34250,   | 1433358, | 1790.0852, |
| 4.485252 |          |            | 4.479371 |          |            | 4.473491 |          |            |
| 34175,   | 1563602, | 1794.7297, | 34213,   | 1492488, | 1792.3765, | 34251,   | 1431666, | 1790.0232, |
| 4.485097 |          |            | 4.479217 |          |            | 4.473336 |          |            |
| 34176,   | 1559568, | 1794.6677, | 34214,   | 1488594, | 1792.3145, | 34252,   | 1427960, | 1789.9613, |
| 4.484943 |          |            | 4.479062 |          |            | 4.473181 |          |            |
| 34177,   | 1555452, | 1794.6058, | 34215,   | 1485290, | 1792.2526, | 34253,   | 1424904, | 1789.8994, |
| 4.484788 |          |            | 4.478907 |          |            | 4.473026 |          |            |
| 34178,   | 1553824, | 1794.5439, | 34216,   | 1484816, | 1792.1907, | 34254,   | 1424370, | 1789.8374, |
| 4.484633 |          |            | 4.478752 |          |            | 4.472872 |          |            |
| 34179,   | 1554196, | 1794.4820, | 34217,   | 1486164, | 1792.1287, | 34255,   | 1425124, | 1789.7755, |
| 4.484478 |          |            | 4.478598 |          |            | 4.472717 |          |            |
| 34180,   | 1553606, | 1794.4200, | 34218,   | 1486226, | 1792.0668, | 34256,   | 1424226, | 1789.7136, |
| 4.484324 |          |            | 4.478443 |          |            | 4.472562 |          |            |
| 34181,   | 1550168, | 1794.3581, | 34219,   | 1483370, | 1792.0049, | 34257,   | 1420520, | 1789.6517, |
| 4.484169 |          |            | 4.478288 |          |            | 4.472407 |          |            |
| 34182,   | 1545340, | 1794.2962, | 34220,   | 1479324, | 1791.9430, | 34258,   | 1416040, | 1789.5897, |
| 4.484014 |          |            | 4.478133 |          |            | 4.472253 |          |            |
| 34183,   | 1542198, | 1794.2343, | 34221,   | 1477058, | 1791.8810, | 34259,   | 1413620, | 1789.5278, |
| 4.483859 |          |            | 4.477979 |          |            | 4.472098 |          |            |
| 34184,   | 1541786, | 1794.1723, | 34222,   | 1477196, | 1791.8191, | 34260,   | 1413572, | 1789.4659, |
| 4.483705 |          |            | 4.477824 |          |            | 4.471943 |          |            |
| 34185,   | 1541906, | 1794.1104, | 34223,   | 1477304, | 1791.7572, | 34261,   | 1413370, | 1789.4040, |
| 4.483550 |          |            | 4.477669 |          |            | 4.471788 |          |            |
| 34186,   | 1539788, | 1794.0485, | 34224,   | 1474776, | 1791.6953, | 34262,   | 1410708, | 1789.3420, |
| 4.483395 |          |            | 4.477514 |          |            | 4.471634 |          |            |
| 34187,   | 1535430, | 1793.9866, | 34225,   | 1470016, | 1791.6333, | 34263,   | 1406280, | 1789.2801, |
| 4.483240 |          |            | 4.477360 |          |            | 4.471479 |          |            |
| 34188,   | 1531592, | 1793.9246, | 34226,   | 1465992, | 1791.5714, | 34264,   | 1402976, | 1789.2182, |
| 4.483086 |          |            | 4.477205 |          |            | 4.471324 |          |            |
| 34189,   | 1530522, | 1793.8627, | 34227,   | 1464872, | 1791.5095, | 34265,   | 1402404, | 1789.1563, |
| 4.482931 |          |            | 4.477050 |          |            | 4.471169 |          |            |
| 34190,   | 1531300, | 1793.8008, | 34228,   | 1465618, | 1791.4475, | 34266,   | 1403010, | 1789.0943, |
| 4.482776 |          |            | 4.476895 |          |            | 4.471014 |          |            |
| 34191,   | 1531002, | 1793.7388, | 34229,   | 1465432, | 1791.3856, | 34267,   | 1401912, | 1789.0324, |
| 4.482621 |          |            | 4.476741 |          |            | 4.470860 |          |            |
| 34192,   | 1528244, | 1793.6769, | 34230,   | 1463158, | 1791.3237, | 34268,   | 1398354, | 1788.9705, |
| 4.482467 |          |            | 4.476586 |          |            | 4.470705 |          |            |
| 34193,   | 1524824, | 1793.6150, | 34231,   | 1460562, | 1791.2618, | 34269,   | 1394570, | 1788.9085, |
| 4.482312 |          |            | 4.476431 |          |            | 4.470550 |          |            |
| 34194,   | 1523498, | 1793.5531, | 34232,   | 1459938, | 1791.1998, | 34270,   | 1393124, | 1788.8466, |
| 4.482157 |          |            | 4.476276 |          |            | 4.470395 |          |            |
| 34195,   | 1524526, | 1793.4911, | 34233,   | 1461048, | 1791.1379, | 34271,   | 1393860, | 1788.7847, |
| 4.482002 |          |            | 4.476121 |          |            | 4.470241 |          |            |
| 34196,   | 1525216, | 1793.4292, | 34234,   | 1461178, | 1791.0760, | 34272,   | 1394154, | 1788.7228, |
| 4.481848 |          |            | 4.475967 |          |            | 4.470086 |          |            |
| 34197,   | 1522986, | 1793.3673, | 34235,   | 1458318, | 1791.0141, | 34273,   | 1392094, | 1788.6608, |
| 4.481693 |          |            | 4.475812 |          |            | 4.469931 |          |            |
| 34198,   | 1518352, | 1793.3054, | 34236,   | 1453666, | 1790.9521, | 34274,   | 1388714, | 1788.5989, |
| 4.481538 |          |            | 4.475657 |          |            | 4.469776 |          |            |
| 34199,   | 1514324, | 1793.2434, | 34237,   | 1450392, | 1790.8902, | 34275,   | 1386644, | 1788.5370, |
| 4.481383 |          |            | 4.475502 |          |            | 4.469622 |          |            |
| 34200,   | 1512910, | 1793.1815, | 34238,   | 1450060, | 1790.8283, | 34276,   | 1386816, | 1788.4751, |
| 4.481228 |          |            | 4.475348 |          |            | 4.469467 |          |            |
| 34201,   | 1512942, | 1793.1196, | 34239,   | 1450926, | 1790.7664, | 34277,   | 1387278, | 1788.4131, |
| 4.481074 |          |            | 4.475193 |          |            | 4.469312 |          |            |
| 34202,   | 1511698, | 1793.0576, | 34240,   | 1450036, | 1790.7044, | 34278,   | 1385552, | 1788.3512, |
| 4.480919 |          |            | 4.475038 |          |            | 4.469157 |          |            |
| 34203,   | 1508276, | 1792.9957, | 34241,   | 1446712, | 1790.6425, | 34279,   | 1381708, | 1788.2893, |
| 4.480764 |          |            | 4.474883 |          |            | 4.469003 |          |            |
| 34204,   | 1504606, | 1792.9338, | 34242,   | 1443190, | 1790.5806, | 34280,   | 1378392, | 1788.2273, |
| 4.480609 |          |            | 4.474729 |          |            | 4.468848 |          |            |
| 34205,   | 1502992, | 1792.8719, | 34243,   | 1441800, | 1790.5186, | 34281,   | 1377706, | 1788.1654, |
| 4.480455 |          |            | 4.474574 |          |            | 4.468693 |          |            |
| 34206,   | 1503198, | 1792.8099, | 34244,   | 1442146, | 1790.4567, | 34282,   | 1378692, | 1788.1035, |
| 4.480300 |          |            | 4.474419 |          |            | 4.468538 |          |            |
| 34207,   | 1502706, | 1792.7480, | 34245,   | 1441626, | 1790.3948, | 34283,   | 1378434, | 1788.0416, |
| 4.480145 |          |            | 4.474264 |          |            | 4.468384 |          |            |
| 34208,   | 1499822, | 1792.6861, | 34246,   | 1438688, | 1790.3329, | 34284,   | 1375514, | 1787.9796, |
| 4.479990 |          |            | 4.474110 |          |            | 4.468229 |          |            |
| 34209,   | 1495820, | 1792.6242, | 34247,   | 1434758, | 1790.2709, | 34285,   | 1371712, | 1787.9177, |
| 4.479836 |          |            | 4.473955 |          |            | 4.468074 |          |            |



|          |          |            |          |          |            |          |          |            |
|----------|----------|------------|----------|----------|------------|----------|----------|------------|
| 34286,   | 1369876, | 1787.8558, | 34324,   | 1306874, | 1785.5026, | 34362,   | 1252270, | 1783.1493, |
| 4.467919 |          |            | 4.462039 |          |            | 4.456158 |          |            |
| 34287,   | 1370468, | 1787.7939, | 34325,   | 1307582, | 1785.4406, | 34363,   | 1252434, | 1783.0874, |
| 4.467765 |          |            | 4.461884 |          |            | 4.456003 |          |            |
| 34288,   | 1370940, | 1787.7319, | 34326,   | 1308010, | 1785.3787, | 34364,   | 1252150, | 1783.0255, |
| 4.467610 |          |            | 4.461729 |          |            | 4.455848 |          |            |
| 34289,   | 1368668, | 1787.6700, | 34327,   | 1306070, | 1785.3168, | 34365,   | 1249734, | 1782.9636, |
| 4.467455 |          |            | 4.461574 |          |            | 4.455693 |          |            |
| 34290,   | 1364028, | 1787.6081, | 34328,   | 1302486, | 1785.2549, | 34366,   | 1246194, | 1782.9016, |
| 4.467300 |          |            | 4.461419 |          |            | 4.455539 |          |            |
| 34291,   | 1360010, | 1787.5462, | 34329,   | 1299914, | 1785.1929, | 34367,   | 1243942, | 1782.8397, |
| 4.467146 |          |            | 4.461265 |          |            | 4.455384 |          |            |
| 34292,   | 1358800, | 1787.4842, | 34330,   | 1299760, | 1785.1310, | 34368,   | 1243832, | 1782.7778, |
| 4.466991 |          |            | 4.461110 |          |            | 4.455229 |          |            |
| 34293,   | 1359416, | 1787.4223, | 34331,   | 1300490, | 1785.0691, | 34369,   | 1244042, | 1782.7159, |
| 4.466836 |          |            | 4.460955 |          |            | 4.455074 |          |            |
| 34294,   | 1359048, | 1787.3604, | 34332,   | 1299476, | 1785.0072, | 34370,   | 1242220, | 1782.6539, |
| 4.466681 |          |            | 4.460800 |          |            | 4.454920 |          |            |
| 34295,   | 1356428, | 1787.2984, | 34333,   | 1296176, | 1784.9452, | 34371,   | 1238312, | 1782.5920, |
| 4.466527 |          |            | 4.460646 |          |            | 4.454765 |          |            |
| 34296,   | 1353196, | 1787.2365, | 34334,   | 1292806, | 1784.8833, | 34372,   | 1234630, | 1782.5301, |
| 4.466372 |          |            | 4.460491 |          |            | 4.454610 |          |            |
| 34297,   | 1351680, | 1787.1746, | 34335,   | 1291738, | 1784.8214, | 34373,   | 1233100, | 1782.4681, |
| 4.466217 |          |            | 4.460336 |          |            | 4.454455 |          |            |
| 34298,   | 1351936, | 1787.1127, | 34336,   | 1292674, | 1784.7594, | 34374,   | 1232998, | 1782.4062, |
| 4.466062 |          |            | 4.460181 |          |            | 4.454301 |          |            |
| 34299,   | 1351648, | 1787.0507, | 34337,   | 1292960, | 1784.6975, | 34375,   | 1231876, | 1782.3443, |
| 4.465907 |          |            | 4.460027 |          |            | 4.454146 |          |            |
| 34300,   | 1348972, | 1786.9888, | 34338,   | 1290658, | 1784.6356, | 34376,   | 1228620, | 1782.2824, |
| 4.465753 |          |            | 4.459872 |          |            | 4.453991 |          |            |
| 34301,   | 1344854, | 1786.9269, | 34339,   | 1286714, | 1784.5737, | 34377,   | 1224904, | 1782.2204, |
| 4.465598 |          |            | 4.459717 |          |            | 4.453836 |          |            |
| 34302,   | 1341966, | 1786.8650, | 34340,   | 1283786, | 1784.5117, | 34378,   | 1223240, | 1782.1585, |
| 4.465443 |          |            | 4.459562 |          |            | 4.453682 |          |            |
| 34303,   | 1341490, | 1786.8030, | 34341,   | 1283076, | 1784.4498, | 34379,   | 1223916, | 1782.0966, |
| 4.465288 |          |            | 4.459408 |          |            | 4.453527 |          |            |
| 34304,   | 1341638, | 1786.7411, | 34342,   | 1283096, | 1784.3879, | 34380,   | 1224498, | 1782.0347, |
| 4.465134 |          |            | 4.459253 |          |            | 4.453372 |          |            |
| 34305,   | 1339788, | 1786.6792, | 34343,   | 1281636, | 1784.3260, | 34381,   | 1222506, | 1781.9727, |
| 4.464979 |          |            | 4.459098 |          |            | 4.453217 |          |            |
| 34306,   | 1335646, | 1786.6173, | 34344,   | 1278494, | 1784.2640, | 34382,   | 1218250, | 1781.9108, |
| 4.464824 |          |            | 4.458943 |          |            | 4.453063 |          |            |
| 34307,   | 1331718, | 1786.5553, | 34345,   | 1275688, | 1784.2021, | 34383,   | 1214420, | 1781.8489, |
| 4.464669 |          |            | 4.458789 |          |            | 4.452908 |          |            |
| 34308,   | 1330424, | 1786.4934, | 34346,   | 1274868, | 1784.1402, | 34384,   | 1213000, | 1781.7870, |
| 4.464515 |          |            | 4.458634 |          |            | 4.452753 |          |            |
| 34309,   | 1331264, | 1786.4315, | 34347,   | 1275202, | 1784.0782, | 34385,   | 1213186, | 1781.7250, |
| 4.464360 |          |            | 4.458479 |          |            | 4.452598 |          |            |
| 34310,   | 1331380, | 1786.3695, | 34348,   | 1274306, | 1784.0163, | 34386,   | 1212608, | 1781.6631, |
| 4.464205 |          |            | 4.458324 |          |            | 4.452444 |          |            |
| 34311,   | 1328818, | 1786.3076, | 34349,   | 1271128, | 1783.9544, | 34387,   | 1210364, | 1781.6012, |
| 4.464050 |          |            | 4.458170 |          |            | 4.452289 |          |            |
| 34312,   | 1324674, | 1786.2457, | 34350,   | 1267292, | 1783.8925, | 34388,   | 1208104, | 1781.5392, |
| 4.463896 |          |            | 4.458015 |          |            | 4.452134 |          |            |
| 34313,   | 1321686, | 1786.1838, | 34351,   | 1265242, | 1783.8305, | 34389,   | 1207916, | 1781.4773, |
| 4.463741 |          |            | 4.457860 |          |            | 4.451979 |          |            |
| 34314,   | 1321016, | 1786.1218, | 34352,   | 1265444, | 1783.7686, | 34390,   | 1209606, | 1781.4154, |
| 4.463586 |          |            | 4.457705 |          |            | 4.451825 |          |            |
| 34315,   | 1321108, | 1786.0599, | 34353,   | 1265934, | 1783.7067, | 34391,   | 1210728, | 1781.3535, |
| 4.463431 |          |            | 4.457551 |          |            | 4.451670 |          |            |
| 34316,   | 1319826, | 1785.9980, | 34354,   | 1264782, | 1783.6448, | 34392,   | 1209376, | 1781.2915, |
| 4.463277 |          |            | 4.457396 |          |            | 4.451515 |          |            |
| 34317,   | 1317124, | 1785.9361, | 34355,   | 1262418, | 1783.5828, | 34393,   | 1206414, | 1781.2296, |
| 4.463122 |          |            | 4.457241 |          |            | 4.451360 |          |            |
| 34318,   | 1315050, | 1785.8741, | 34356,   | 1260966, | 1783.5209, | 34394,   | 1204434, | 1781.1677, |
| 4.462967 |          |            | 4.457086 |          |            | 4.451205 |          |            |
| 34319,   | 1315000, | 1785.8122, | 34357,   | 1261498, | 1783.4590, | 34395,   | 1204700, | 1781.1058, |
| 4.462812 |          |            | 4.456932 |          |            | 4.451051 |          |            |
| 34320,   | 1315820, | 1785.7503, | 34358,   | 1262452, | 1783.3971, | 34396,   | 1205674, | 1781.0438, |
| 4.462658 |          |            | 4.456777 |          |            | 4.450896 |          |            |
| 34321,   | 1315044, | 1785.6883, | 34359,   | 1261388, | 1783.3351, | 34397,   | 1204880, | 1780.9819, |
| 4.462503 |          |            | 4.456622 |          |            | 4.450741 |          |            |
| 34322,   | 1311890, | 1785.6264, | 34360,   | 1257848, | 1783.2732, | 34398,   | 1201864, | 1780.9200, |
| 4.462348 |          |            | 4.456467 |          |            | 4.450586 |          |            |
| 34323,   | 1308336, | 1785.5645, | 34361,   | 1254024, | 1783.2113, | 34399,   | 1198688, | 1780.8580, |
| 4.462193 |          |            | 4.456312 |          |            | 4.450432 |          |            |

|          |          |            |          |          |            |          |          |            |
|----------|----------|------------|----------|----------|------------|----------|----------|------------|
| 34400,   | 1197396, | 1780.7961, | 34438,   | 1139194, | 1778.4429, | 34476,   | 1084104, | 1776.0897, |
| 4.450277 |          |            | 4.444396 |          |            | 4.438515 |          |            |
| 34401,   | 1197536, | 1780.7342, | 34439,   | 1140204, | 1778.3810, | 34477,   | 1084410, | 1776.0277, |
| 4.450122 |          |            | 4.444241 |          |            | 4.438361 |          |            |
| 34402,   | 1196722, | 1780.6723, | 34440,   | 1140042, | 1778.3190, | 34478,   | 1083446, | 1775.9658, |
| 4.449967 |          |            | 4.444087 |          |            | 4.438206 |          |            |
| 34403,   | 1193554, | 1780.6103, | 34441,   | 1137422, | 1778.2571, | 34479,   | 1080560, | 1775.9039, |
| 4.449813 |          |            | 4.443932 |          |            | 4.438051 |          |            |
| 34404,   | 1189366, | 1780.5484, | 34442,   | 1133840, | 1778.1952, | 34480,   | 1077500, | 1775.8420, |
| 4.449658 |          |            | 4.443777 |          |            | 4.437896 |          |            |
| 34405,   | 1186710, | 1780.4865, | 34443,   | 1131788, | 1778.1333, | 34481,   | 1076386, | 1775.7800, |
| 4.449503 |          |            | 4.443622 |          |            | 4.437742 |          |            |
| 34406,   | 1186326, | 1780.4246, | 34444,   | 1131806, | 1778.0713, | 34482,   | 1077164, | 1775.7181, |
| 4.449348 |          |            | 4.443468 |          |            | 4.437587 |          |            |
| 34407,   | 1186310, | 1780.3626, | 34445,   | 1131938, | 1778.0094, | 34483,   | 1077630, | 1775.6562, |
| 4.449194 |          |            | 4.443313 |          |            | 4.437432 |          |            |
| 34408,   | 1184374, | 1780.3007, | 34446,   | 1130166, | 1777.9475, | 34484,   | 1076036, | 1775.5943, |
| 4.449039 |          |            | 4.443158 |          |            | 4.437277 |          |            |
| 34409,   | 1180614, | 1780.2388, | 34447,   | 1126852, | 1777.8856, | 34485,   | 1073132, | 1775.5323, |
| 4.448884 |          |            | 4.443003 |          |            | 4.437123 |          |            |
| 34410,   | 1177412, | 1780.1769, | 34448,   | 1124288, | 1777.8236, | 34486,   | 1071232, | 1775.4704, |
| 4.448729 |          |            | 4.442849 |          |            | 4.436968 |          |            |
| 34411,   | 1176600, | 1780.1149, | 34449,   | 1123900, | 1777.7617, | 34487,   | 1071396, | 1775.4085, |
| 4.448575 |          |            | 4.442694 |          |            | 4.436813 |          |            |
| 34412,   | 1177358, | 1780.0530, | 34450,   | 1124500, | 1777.6998, | 34488,   | 1072156, | 1775.3466, |
| 4.448420 |          |            | 4.442539 |          |            | 4.436658 |          |            |
| 34413,   | 1177176, | 1779.9911, | 34451,   | 1123724, | 1777.6378, | 34489,   | 1071294, | 1775.2846, |
| 4.448265 |          |            | 4.442384 |          |            | 4.436504 |          |            |
| 34414,   | 1174854, | 1779.9291, | 34452,   | 1120820, | 1777.5759, | 34490,   | 1068590, | 1775.2227, |
| 4.448110 |          |            | 4.442230 |          |            | 4.436349 |          |            |
| 34415,   | 1171794, | 1779.8672, | 34453,   | 1117546, | 1777.5140, | 34491,   | 1066132, | 1775.1608, |
| 4.447956 |          |            | 4.442075 |          |            | 4.436194 |          |            |
| 34416,   | 1170210, | 1779.8053, | 34454,   | 1115990, | 1777.4521, | 34492,   | 1065854, | 1775.0988, |
| 4.447801 |          |            | 4.441920 |          |            | 4.436039 |          |            |
| 34417,   | 1170430, | 1779.7434, | 34455,   | 1116040, | 1777.3901, | 34493,   | 1067152, | 1775.0369, |
| 4.447646 |          |            | 4.441765 |          |            | 4.435884 |          |            |
| 34418,   | 1170578, | 1779.6814, | 34456,   | 1115550, | 1777.3282, | 34494,   | 1067518, | 1774.9750, |
| 4.447491 |          |            | 4.441611 |          |            | 4.435730 |          |            |
| 34419,   | 1169010, | 1779.6195, | 34457,   | 1113004, | 1777.2663, | 34495,   | 1065438, | 1774.9131, |
| 4.447337 |          |            | 4.441456 |          |            | 4.435575 |          |            |
| 34420,   | 1166386, | 1779.5576, | 34458,   | 1109456, | 1777.2044, | 34496,   | 1062122, | 1774.8511, |
| 4.447182 |          |            | 4.441301 |          |            | 4.435420 |          |            |
| 34421,   | 1164912, | 1779.4957, | 34459,   | 1107336, | 1777.1424, | 34497,   | 1060040, | 1774.7892, |
| 4.447027 |          |            | 4.441146 |          |            | 4.435265 |          |            |
| 34422,   | 1165492, | 1779.4337, | 34460,   | 1107568, | 1777.0805, | 34498,   | 1059960, | 1774.7273, |
| 4.446872 |          |            | 4.440991 |          |            | 4.435111 |          |            |
| 34423,   | 1166430, | 1779.3718, | 34461,   | 1108350, | 1777.0186, | 34499,   | 1060098, | 1774.6654, |
| 4.446718 |          |            | 4.440837 |          |            | 4.434956 |          |            |
| 34424,   | 1165190, | 1779.3099, | 34462,   | 1107236, | 1776.9567, | 34500,   | 1058306, | 1774.6034, |
| 4.446563 |          |            | 4.440682 |          |            | 4.434801 |          |            |
| 34425,   | 1161356, | 1779.2479, | 34463,   | 1103950, | 1776.8947, | 34501,   | 1054708, | 1774.5415, |
| 4.446408 |          |            | 4.440527 |          |            | 4.434646 |          |            |
| 34426,   | 1157176, | 1779.1860, | 34464,   | 1100678, | 1776.8328, | 34502,   | 1051572, | 1774.4796, |
| 4.446253 |          |            | 4.440372 |          |            | 4.434492 |          |            |
| 34427,   | 1155044, | 1779.1241, | 34465,   | 1099478, | 1776.7709, | 34503,   | 1050612, | 1774.4176, |
| 4.446098 |          |            | 4.440218 |          |            | 4.434337 |          |            |
| 34428,   | 1154890, | 1779.0622, | 34466,   | 1099866, | 1776.7089, | 34504,   | 1050928, | 1774.3557, |
| 4.445944 |          |            | 4.440063 |          |            | 4.434182 |          |            |
| 34429,   | 1154460, | 1779.0002, | 34467,   | 1099464, | 1776.6470, | 34505,   | 1050148, | 1774.2938, |
| 4.445789 |          |            | 4.439908 |          |            | 4.434027 |          |            |
| 34430,   | 1152152, | 1778.9383, | 34468,   | 1096844, | 1776.5851, | 34506,   | 1047348, | 1774.2319, |
| 4.445634 |          |            | 4.439753 |          |            | 4.433873 |          |            |
| 34431,   | 1148914, | 1778.8764, | 34469,   | 1093246, | 1776.5232, | 34507,   | 1044276, | 1774.1699, |
| 4.445479 |          |            | 4.439599 |          |            | 4.433718 |          |            |
| 34432,   | 1146982, | 1778.8145, | 34470,   | 1091054, | 1776.4612, | 34508,   | 1043308, | 1774.1080, |
| 4.445325 |          |            | 4.439444 |          |            | 4.433563 |          |            |
| 34433,   | 1147066, | 1778.7525, | 34471,   | 1090996, | 1776.3993, | 34509,   | 1044536, | 1774.0461, |
| 4.445170 |          |            | 4.439289 |          |            | 4.433408 |          |            |
| 34434,   | 1147392, | 1778.6906, | 34472,   | 1091334, | 1776.3374, | 34510,   | 1045426, | 1773.9842, |
| 4.445015 |          |            | 4.439134 |          |            | 4.433254 |          |            |
| 34435,   | 1145804, | 1778.6287, | 34473,   | 1090014, | 1776.2755, | 34511,   | 1043606, | 1773.9222, |
| 4.444860 |          |            | 4.438980 |          |            | 4.433099 |          |            |
| 34436,   | 1142432, | 1778.5668, | 34474,   | 1087122, | 1776.2135, | 34512,   | 1039500, | 1773.8603, |
| 4.444706 |          |            | 4.438825 |          |            | 4.432944 |          |            |
| 34437,   | 1139630, | 1778.5048, | 34475,   | 1084684, | 1776.1516, | 34513,   | 1035836, | 1773.7984, |
| 4.444551 |          |            | 4.438670 |          |            | 4.432789 |          |            |

|          |          |            |          |         |            |          |         |            |
|----------|----------|------------|----------|---------|------------|----------|---------|------------|
| 34514,   | 1034542, | 1773.7365, | 34552,   | 987052, | 1771.3832, | 34590,   | 941214, | 1769.0300, |
| 4.432635 |          |            | 4.426754 |         |            | 4.420873 |         |            |
| 34515,   | 1034706, | 1773.6745, | 34553,   | 987186, | 1771.3213, | 34591,   | 941786, | 1768.9681, |
| 4.432480 |          |            | 4.426599 |         |            | 4.420718 |         |            |
| 34516,   | 1033822, | 1773.6126, | 34554,   | 985332, | 1771.2594, | 34592,   | 940534, | 1768.9062, |
| 4.432325 |          |            | 4.426444 |         |            | 4.420563 |         |            |
| 34517,   | 1030794, | 1773.5507, | 34555,   | 981634, | 1771.1975, | 34593,   | 937452, | 1768.8442, |
| 4.432170 |          |            | 4.426290 |         |            | 4.420409 |         |            |
| 34518,   | 1027200, | 1773.4887, | 34556,   | 978318, | 1771.1355, | 34594,   | 934652, | 1768.7823, |
| 4.432016 |          |            | 4.426135 |         |            | 4.420254 |         |            |
| 34519,   | 1025386, | 1773.4268, | 34557,   | 977300, | 1771.0736, | 34595,   | 933832, | 1768.7204, |
| 4.431861 |          |            | 4.425980 |         |            | 4.420099 |         |            |
| 34520,   | 1025814, | 1773.3649, | 34558,   | 978048, | 1771.0117, | 34596,   | 934258, | 1768.6584, |
| 4.431706 |          |            | 4.425825 |         |            | 4.419944 |         |            |
| 34521,   | 1026676, | 1773.3030, | 34559,   | 978290, | 1770.9497, | 34597,   | 933730, | 1768.5965, |
| 4.431551 |          |            | 4.425670 |         |            | 4.419790 |         |            |
| 34522,   | 1026148, | 1773.2410, | 34560,   | 976650, | 1770.8878, | 34598,   | 931282, | 1768.5346, |
| 4.431397 |          |            | 4.425516 |         |            | 4.419635 |         |            |
| 34523,   | 1024360, | 1773.1791, | 34561,   | 974114, | 1770.8259, | 34599,   | 928322, | 1768.4727, |
| 4.431242 |          |            | 4.425361 |         |            | 4.419480 |         |            |
| 34524,   | 1022890, | 1773.1172, | 34562,   | 972664, | 1770.7640, | 34600,   | 926914, | 1768.4107, |
| 4.431087 |          |            | 4.425206 |         |            | 4.419325 |         |            |
| 34525,   | 1022548, | 1773.0553, | 34563,   | 972810, | 1770.7020, | 34601,   | 927194, | 1768.3488, |
| 4.430932 |          |            | 4.425051 |         |            | 4.419171 |         |            |
| 34526,   | 1022316, | 1772.9933, | 34564,   | 973028, | 1770.6401, | 34602,   | 927182, | 1768.2869, |
| 4.430777 |          |            | 4.424897 |         |            | 4.419016 |         |            |
| 34527,   | 1020772, | 1772.9314, | 34565,   | 971732, | 1770.5782, | 34603,   | 925202, | 1768.2250, |
| 4.430623 |          |            | 4.424742 |         |            | 4.418861 |         |            |
| 34528,   | 1018098, | 1772.8695, | 34566,   | 969324, | 1770.5163, | 34604,   | 922014, | 1768.1630, |
| 4.430468 |          |            | 4.424587 |         |            | 4.418706 |         |            |
| 34529,   | 1016052, | 1772.8076, | 34567,   | 967718, | 1770.4543, | 34605,   | 920024, | 1768.1011, |
| 4.430313 |          |            | 4.424432 |         |            | 4.418552 |         |            |
| 34530,   | 1015798, | 1772.7456, | 34568,   | 967926, | 1770.3924, | 34606,   | 920440, | 1768.0392, |
| 4.430158 |          |            | 4.424278 |         |            | 4.418397 |         |            |
| 34531,   | 1016312, | 1772.6837, | 34569,   | 968644, | 1770.3305, | 34607,   | 921742, | 1767.9773, |
| 4.430004 |          |            | 4.424123 |         |            | 4.418242 |         |            |
| 34532,   | 1015368, | 1772.6218, | 34570,   | 967674, | 1770.2685, | 34608,   | 921316, | 1767.9153, |
| 4.429849 |          |            | 4.423968 |         |            | 4.418087 |         |            |
| 34533,   | 1012158, | 1772.5598, | 34571,   | 964556, | 1770.2066, | 34609,   | 918398, | 1767.8534, |
| 4.429694 |          |            | 4.423813 |         |            | 4.417933 |         |            |
| 34534,   | 1008394, | 1772.4979, | 34572,   | 961232, | 1770.1447, | 34610,   | 914878, | 1767.7915, |
| 4.429539 |          |            | 4.423659 |         |            | 4.417778 |         |            |
| 34535,   | 1006450, | 1772.4360, | 34573,   | 959860, | 1770.0828, | 34611,   | 913068, | 1767.7295, |
| 4.429385 |          |            | 4.423504 |         |            | 4.417623 |         |            |
| 34536,   | 1006720, | 1772.3741, | 34574,   | 960338, | 1770.0208, | 34612,   | 913066, | 1767.6676, |
| 4.429230 |          |            | 4.423349 |         |            | 4.417468 |         |            |
| 34537,   | 1007202, | 1772.3121, | 34575,   | 960412, | 1769.9589, | 34613,   | 912850, | 1767.6057, |
| 4.429075 |          |            | 4.423194 |         |            | 4.417314 |         |            |
| 34538,   | 1005884, | 1772.2502, | 34576,   | 958370, | 1769.8970, | 34614,   | 910848, | 1767.5438, |
| 4.428920 |          |            | 4.423040 |         |            | 4.417159 |         |            |
| 34539,   | 1003074, | 1772.1883, | 34577,   | 955022, | 1769.8351, | 34615,   | 907900, | 1767.4818, |
| 4.428766 |          |            | 4.422885 |         |            | 4.417004 |         |            |
| 34540,   | 1000970, | 1772.1264, | 34578,   | 952722, | 1769.7731, | 34616,   | 906236, | 1767.4199, |
| 4.428611 |          |            | 4.422730 |         |            | 4.416849 |         |            |
| 34541,   | 1001006, | 1772.0644, | 34579,   | 952534, | 1769.7112, | 34617,   | 906716, | 1767.3580, |
| 4.428456 |          |            | 4.422575 |         |            | 4.416695 |         |            |
| 34542,   | 1002082, | 1772.0025, | 34580,   | 952988, | 1769.6493, | 34618,   | 907700, | 1767.2961, |
| 4.428301 |          |            | 4.422421 |         |            | 4.416540 |         |            |
| 34543,   | 1001812, | 1771.9406, | 34581,   | 951890, | 1769.5874, | 34619,   | 906912, | 1767.2341, |
| 4.428147 |          |            | 4.422266 |         |            | 4.416385 |         |            |
| 34544,   | 999228,  | 1771.8786, | 34582,   | 949000, | 1769.5254, | 34620,   | 904096, | 1767.1722, |
| 4.427992 |          |            | 4.422111 |         |            | 4.416230 |         |            |
| 34545,   | 995814,  | 1771.8167, | 34583,   | 946392, | 1769.4635, | 34621,   | 901310, | 1767.1103, |
| 4.427837 |          |            | 4.421956 |         |            | 4.416075 |         |            |
| 34546,   | 993658,  | 1771.7548, | 34584,   | 945990, | 1769.4016, | 34622,   | 900480, | 1767.0483, |
| 4.427682 |          |            | 4.421802 |         |            | 4.415921 |         |            |
| 34547,   | 993096,  | 1771.6929, | 34585,   | 947234, | 1769.3396, | 34623,   | 901172, | 1766.9864, |
| 4.427528 |          |            | 4.421647 |         |            | 4.415766 |         |            |
| 34548,   | 992554,  | 1771.6309, | 34586,   | 947670, | 1769.2777, | 34624,   | 901174, | 1766.9245, |
| 4.427373 |          |            | 4.421492 |         |            | 4.415611 |         |            |
| 34549,   | 990728,  | 1771.5690, | 34587,   | 945792, | 1769.2158, | 34625,   | 899160, | 1766.8626, |
| 4.427218 |          |            | 4.421337 |         |            | 4.415456 |         |            |
| 34550,   | 988256,  | 1771.5071, | 34588,   | 942752, | 1769.1539, | 34626,   | 896210, | 1766.8006, |
| 4.427063 |          |            | 4.421183 |         |            | 4.415302 |         |            |
| 34551,   | 986870,  | 1771.4452, | 34589,   | 940960, | 1769.0919, | 34627,   | 894454, | 1766.7387, |
| 4.426909 |          |            | 4.421028 |         |            | 4.415147 |         |            |

|          |         |            |          |         |            |          |         |            |
|----------|---------|------------|----------|---------|------------|----------|---------|------------|
| 34628,   | 894440, | 1766.6768, | 34666,   | 851310, | 1764.3236, | 34704,   | 808990, | 1761.9703, |
| 4.414992 |         |            | 4.409111 |         |            | 4.403231 |         |            |
| 34629,   | 894506, | 1766.6149, | 34667,   | 851242, | 1764.2616, | 34705,   | 809438, | 1761.9084, |
| 4.414837 |         |            | 4.408957 |         |            | 4.403076 |         |            |
| 34630,   | 892818, | 1766.5529, | 34668,   | 849276, | 1764.1997, | 34706,   | 808100, | 1761.8465, |
| 4.414683 |         |            | 4.408802 |         |            | 4.402921 |         |            |
| 34631,   | 889658, | 1766.4910, | 34669,   | 845962, | 1764.1378, | 34707,   | 805514, | 1761.7846, |
| 4.414528 |         |            | 4.408647 |         |            | 4.402766 |         |            |
| 34632,   | 887130, | 1766.4291, | 34670,   | 843572, | 1764.0759, | 34708,   | 803624, | 1761.7226, |
| 4.414373 |         |            | 4.408492 |         |            | 4.402612 |         |            |
| 34633,   | 886682, | 1766.3672, | 34671,   | 843358, | 1764.0139, | 34709,   | 803358, | 1761.6607, |
| 4.414218 |         |            | 4.408338 |         |            | 4.402457 |         |            |
| 34634,   | 887402, | 1766.3052, | 34672,   | 844002, | 1763.9520, | 34710,   | 803554, | 1761.5988, |
| 4.414064 |         |            | 4.408183 |         |            | 4.402302 |         |            |
| 34635,   | 887124, | 1766.2433, | 34673,   | 843110, | 1763.8901, | 34711,   | 802436, | 1761.5369, |
| 4.413909 |         |            | 4.408028 |         |            | 4.402147 |         |            |
| 34636,   | 885048, | 1766.1814, | 34674,   | 840008, | 1763.8281, | 34712,   | 799888, | 1761.4749, |
| 4.413754 |         |            | 4.407873 |         |            | 4.401993 |         |            |
| 34637,   | 882636, | 1766.1194, | 34675,   | 836522, | 1763.7662, | 34713,   | 797688, | 1761.4130, |
| 4.413599 |         |            | 4.407719 |         |            | 4.401838 |         |            |
| 34638,   | 881806, | 1766.0575, | 34676,   | 834916, | 1763.7043, | 34714,   | 797358, | 1761.3511, |
| 4.413445 |         |            | 4.407564 |         |            | 4.401683 |         |            |
| 34639,   | 882556, | 1765.9956, | 34677,   | 835348, | 1763.6424, | 34715,   | 798300, | 1761.2891, |
| 4.413290 |         |            | 4.407409 |         |            | 4.401528 |         |            |
| 34640,   | 882918, | 1765.9337, | 34678,   | 835892, | 1763.5804, | 34716,   | 798428, | 1761.2272, |
| 4.413135 |         |            | 4.407254 |         |            | 4.401374 |         |            |
| 34641,   | 881324, | 1765.8717, | 34679,   | 834918, | 1763.5185, | 34717,   | 796654, | 1761.1653, |
| 4.412980 |         |            | 4.407100 |         |            | 4.401219 |         |            |
| 34642,   | 878458, | 1765.8098, | 34680,   | 832990, | 1763.4566, | 34718,   | 794166, | 1761.1034, |
| 4.412826 |         |            | 4.406945 |         |            | 4.401064 |         |            |
| 34643,   | 876460, | 1765.7479, | 34681,   | 831960, | 1763.3947, | 34719,   | 792968, | 1761.0414, |
| 4.412671 |         |            | 4.406790 |         |            | 4.400909 |         |            |
| 34644,   | 876352, | 1765.6860, | 34682,   | 832508, | 1763.3327, | 34720,   | 793350, | 1760.9795, |
| 4.412516 |         |            | 4.406635 |         |            | 4.400754 |         |            |
| 34645,   | 876886, | 1765.6240, | 34683,   | 833132, | 1763.2708, | 34721,   | 793410, | 1760.9176, |
| 4.412361 |         |            | 4.406481 |         |            | 4.400600 |         |            |
| 34646,   | 876120, | 1765.5621, | 34684,   | 831836, | 1763.2089, | 34722,   | 791200, | 1760.8557, |
| 4.412207 |         |            | 4.406326 |         |            | 4.400445 |         |            |
| 34647,   | 873840, | 1765.5002, | 34685,   | 828542, | 1763.1470, | 34723,   | 787122, | 1760.7937, |
| 4.412052 |         |            | 4.406171 |         |            | 4.400290 |         |            |
| 34648,   | 871824, | 1765.4382, | 34686,   | 825258, | 1763.0850, | 34724,   | 783636, | 1760.7318, |
| 4.411897 |         |            | 4.406016 |         |            | 4.400135 |         |            |
| 34649,   | 871608, | 1765.3763, | 34687,   | 823786, | 1763.0231, | 34725,   | 782622, | 1760.6699, |
| 4.411742 |         |            | 4.405861 |         |            | 4.399981 |         |            |
| 34650,   | 872522, | 1765.3144, | 34688,   | 823758, | 1762.9612, | 34726,   | 783430, | 1760.6080, |
| 4.411588 |         |            | 4.405707 |         |            | 4.399826 |         |            |
| 34651,   | 872376, | 1765.2525, | 34689,   | 823206, | 1762.8992, | 34727,   | 783772, | 1760.5460, |
| 4.411433 |         |            | 4.405552 |         |            | 4.399671 |         |            |
| 34652,   | 870092, | 1765.1905, | 34690,   | 821078, | 1762.8373, | 34728,   | 782406, | 1760.4841, |
| 4.411278 |         |            | 4.405397 |         |            | 4.399516 |         |            |
| 34653,   | 867104, | 1765.1286, | 34691,   | 818494, | 1762.7754, | 34729,   | 780368, | 1760.4222, |
| 4.411123 |         |            | 4.405242 |         |            | 4.399362 |         |            |
| 34654,   | 865764, | 1765.0667, | 34692,   | 817348, | 1762.7135, | 34730,   | 779458, | 1760.3602, |
| 4.410968 |         |            | 4.405088 |         |            | 4.399207 |         |            |
| 34655,   | 866598, | 1765.0048, | 34693,   | 817934, | 1762.6515, | 34731,   | 779904, | 1760.2983, |
| 4.410814 |         |            | 4.404933 |         |            | 4.399052 |         |            |
| 34656,   | 867656, | 1764.9428, | 34694,   | 818490, | 1762.5896, | 34732,   | 780060, | 1760.2364, |
| 4.410659 |         |            | 4.404778 |         |            | 4.398897 |         |            |
| 34657,   | 866720, | 1764.8809, | 34695,   | 817320, | 1762.5277, | 34733,   | 778478, | 1760.1745, |
| 4.410504 |         |            | 4.404623 |         |            | 4.398743 |         |            |
| 34658,   | 863846, | 1764.8190, | 34696,   | 814826, | 1762.4658, | 34734,   | 775812, | 1760.1125, |
| 4.410349 |         |            | 4.404469 |         |            | 4.398588 |         |            |
| 34659,   | 861188, | 1764.7571, | 34697,   | 813090, | 1762.4038, | 34735,   | 774154, | 1760.0506, |
| 4.410195 |         |            | 4.404314 |         |            | 4.398433 |         |            |
| 34660,   | 860392, | 1764.6951, | 34698,   | 813364, | 1762.3419, | 34736,   | 774614, | 1759.9887, |
| 4.410040 |         |            | 4.404159 |         |            | 4.398278 |         |            |
| 34661,   | 860654, | 1764.6332, | 34699,   | 814540, | 1762.2800, | 34737,   | 775960, | 1759.9268, |
| 4.409885 |         |            | 4.404004 |         |            | 4.398124 |         |            |
| 34662,   | 859742, | 1764.5713, | 34700,   | 814384, | 1762.2180, | 34738,   | 776040, | 1759.8648, |
| 4.409730 |         |            | 4.403850 |         |            | 4.397969 |         |            |
| 34663,   | 856736, | 1764.5093, | 34701,   | 812160, | 1762.1561, | 34739,   | 774238, | 1759.8029, |
| 4.409576 |         |            | 4.403695 |         |            | 4.397814 |         |            |
| 34664,   | 853188, | 1764.4474, | 34702,   | 809468, | 1762.0942, | 34740,   | 772062, | 1759.7410, |
| 4.409421 |         |            | 4.403540 |         |            | 4.397659 |         |            |
| 34665,   | 851296, | 1764.3855, | 34703,   | 808372, | 1762.0323, | 34741,   | 771250, | 1759.6790, |
| 4.409266 |         |            | 4.403385 |         |            | 4.397505 |         |            |

|          |         |            |          |         |            |          |         |            |
|----------|---------|------------|----------|---------|------------|----------|---------|------------|
| 34742,   | 771646, | 1759.6171, | 34780,   | 737532, | 1757.2639, | 34818,   | 706188, | 1754.9107, |
| 4.397350 |         |            | 4.391469 |         |            | 4.385588 |         |            |
| 34743,   | 771478, | 1759.5552, | 34781,   | 737060, | 1757.2020, | 34819,   | 705822, | 1754.8487, |
| 4.397195 |         |            | 4.391314 |         |            | 4.385433 |         |            |
| 34744,   | 769618, | 1759.4933, | 34782,   | 734950, | 1757.1400, | 34820,   | 704024, | 1754.7868, |
| 4.397040 |         |            | 4.391160 |         |            | 4.385279 |         |            |
| 34745,   | 767114, | 1759.4313, | 34783,   | 732624, | 1757.0781, | 34821,   | 702064, | 1754.7249, |
| 4.396886 |         |            | 4.391005 |         |            | 4.385124 |         |            |
| 34746,   | 766048, | 1759.3694, | 34784,   | 731994, | 1757.0162, | 34822,   | 701548, | 1754.6630, |
| 4.396731 |         |            | 4.390850 |         |            | 4.384969 |         |            |
| 34747,   | 767040, | 1759.3075, | 34785,   | 733228, | 1756.9543, | 34823,   | 702404, | 1754.6010, |
| 4.396576 |         |            | 4.390695 |         |            | 4.384814 |         |            |
| 34748,   | 768414, | 1759.2456, | 34786,   | 734474, | 1756.8923, | 34824,   | 702862, | 1754.5391, |
| 4.396421 |         |            | 4.390540 |         |            | 4.384660 |         |            |
| 34749,   | 768018, | 1759.1836, | 34787,   | 733954, | 1756.8304, | 34825,   | 701526, | 1754.4772, |
| 4.396267 |         |            | 4.390386 |         |            | 4.384505 |         |            |
| 34750,   | 765592, | 1759.1217, | 34788,   | 731948, | 1756.7685, | 34826,   | 699084, | 1754.4153, |
| 4.396112 |         |            | 4.390231 |         |            | 4.384350 |         |            |
| 34751,   | 762980, | 1759.0598, | 34789,   | 730338, | 1756.7066, | 34827,   | 697516, | 1754.3533, |
| 4.395957 |         |            | 4.390076 |         |            | 4.384195 |         |            |
| 34752,   | 761894, | 1758.9979, | 34790,   | 730264, | 1756.6446, | 34828,   | 697788, | 1754.2914, |
| 4.395802 |         |            | 4.389921 |         |            | 4.384041 |         |            |
| 34753,   | 762018, | 1758.9359, | 34791,   | 730740, | 1756.5827, | 34829,   | 698674, | 1754.2295, |
| 4.395647 |         |            | 4.389767 |         |            | 4.383886 |         |            |
| 34754,   | 761576, | 1758.8740, | 34792,   | 729862, | 1756.5208, | 34830,   | 698182, | 1754.1676, |
| 4.395493 |         |            | 4.389612 |         |            | 4.383731 |         |            |
| 34755,   | 759616, | 1758.8121, | 34793,   | 727176, | 1756.4588, | 34831,   | 695900, | 1754.1056, |
| 4.395338 |         |            | 4.389457 |         |            | 4.383576 |         |            |
| 34756,   | 757212, | 1758.7501, | 34794,   | 724378, | 1756.3969, | 34832,   | 693506, | 1754.0437, |
| 4.395183 |         |            | 4.389302 |         |            | 4.383422 |         |            |
| 34757,   | 756130, | 1758.6882, | 34795,   | 723400, | 1756.3350, | 34833,   | 692830, | 1753.9818, |
| 4.395028 |         |            | 4.389148 |         |            | 4.383267 |         |            |
| 34758,   | 756618, | 1758.6263, | 34796,   | 724180, | 1756.2731, | 34834,   | 693750, | 1753.9198, |
| 4.394874 |         |            | 4.388993 |         |            | 4.383112 |         |            |
| 34759,   | 757032, | 1758.5644, | 34797,   | 724736, | 1756.2111, | 34835,   | 694416, | 1753.8579, |
| 4.394719 |         |            | 4.388838 |         |            | 4.382957 |         |            |
| 34760,   | 755800, | 1758.5024, | 34798,   | 723462, | 1756.1492, | 34836,   | 693406, | 1753.7960, |
| 4.394564 |         |            | 4.388683 |         |            | 4.382803 |         |            |
| 34761,   | 753342, | 1758.4405, | 34799,   | 720946, | 1756.0873, | 34837,   | 691314, | 1753.7341, |
| 4.394409 |         |            | 4.388529 |         |            | 4.382648 |         |            |
| 34762,   | 751614, | 1758.3786, | 34800,   | 719194, | 1756.0254, | 34838,   | 689844, | 1753.6721, |
| 4.394255 |         |            | 4.388374 |         |            | 4.382493 |         |            |
| 34763,   | 751830, | 1758.3167, | 34801,   | 719200, | 1755.9634, | 34839,   | 689690, | 1753.6102, |
| 4.394100 |         |            | 4.388219 |         |            | 4.382338 |         |            |
| 34764,   | 752990, | 1758.2547, | 34802,   | 719816, | 1755.9015, | 34840,   | 689686, | 1753.5483, |
| 4.393945 |         |            | 4.388064 |         |            | 4.382184 |         |            |
| 34765,   | 753042, | 1758.1928, | 34803,   | 719208, | 1755.8396, | 34841,   | 688318, | 1753.4864, |
| 4.393790 |         |            | 4.387910 |         |            | 4.382029 |         |            |
| 34766,   | 751234, | 1758.1309, | 34804,   | 717142, | 1755.7777, | 34842,   | 685674, | 1753.4244, |
| 4.393636 |         |            | 4.387755 |         |            | 4.381874 |         |            |
| 34767,   | 748900, | 1758.0689, | 34805,   | 715322, | 1755.7157, | 34843,   | 683456, | 1753.3625, |
| 4.393481 |         |            | 4.387600 |         |            | 4.381719 |         |            |
| 34768,   | 747814, | 1758.0070, | 34806,   | 715340, | 1755.6538, | 34844,   | 682982, | 1753.3006, |
| 4.393326 |         |            | 4.387445 |         |            | 4.381565 |         |            |
| 34769,   | 748080, | 1757.9451, | 34807,   | 716718, | 1755.5919, | 34845,   | 683614, | 1753.2386, |
| 4.393171 |         |            | 4.387291 |         |            | 4.381410 |         |            |
| 34770,   | 748116, | 1757.8832, | 34808,   | 717342, | 1755.5299, | 34846,   | 683496, | 1753.1767, |
| 4.393017 |         |            | 4.387136 |         |            | 4.381255 |         |            |
| 34771,   | 746626, | 1757.8212, | 34809,   | 715848, | 1755.4680, | 34847,   | 681712, | 1753.1148, |
| 4.392862 |         |            | 4.386981 |         |            | 4.381100 |         |            |
| 34772,   | 744170, | 1757.7593, | 34810,   | 713128, | 1755.4061, | 34848,   | 679322, | 1753.0529, |
| 4.392707 |         |            | 4.386826 |         |            | 4.380946 |         |            |
| 34773,   | 742444, | 1757.6974, | 34811,   | 711216, | 1755.3442, | 34849,   | 678042, | 1752.9909, |
| 4.392552 |         |            | 4.386672 |         |            | 4.380791 |         |            |
| 34774,   | 742168, | 1757.6355, | 34812,   | 710952, | 1755.2822, | 34850,   | 678188, | 1752.9290, |
| 4.392398 |         |            | 4.386517 |         |            | 4.380636 |         |            |
| 34775,   | 742262, | 1757.5735, | 34813,   | 711138, | 1755.2203, | 34851,   | 678374, | 1752.8671, |
| 4.392243 |         |            | 4.386362 |         |            | 4.380481 |         |            |
| 34776,   | 741224, | 1757.5116, | 34814,   | 710148, | 1755.1584, | 34852,   | 677282, | 1752.8052, |
| 4.392088 |         |            | 4.386207 |         |            | 4.380326 |         |            |
| 34777,   | 739054, | 1757.4497, | 34815,   | 707944, | 1755.0965, | 34853,   | 675308, | 1752.7432, |
| 4.391933 |         |            | 4.386053 |         |            | 4.380172 |         |            |
| 34778,   | 737268, | 1757.3878, | 34816,   | 706068, | 1755.0345, | 34854,   | 674086, | 1752.6813, |
| 4.391779 |         |            | 4.385898 |         |            | 4.380017 |         |            |
| 34779,   | 737004, | 1757.3258, | 34817,   | 705708, | 1754.9726, | 34855,   | 674424, | 1752.6194, |
| 4.391624 |         |            | 4.385743 |         |            | 4.379862 |         |            |

|          |         |            |          |         |            |          |         |            |
|----------|---------|------------|----------|---------|------------|----------|---------|------------|
| 34856,   | 675210, | 1752.5575, | 34894,   | 648824, | 1750.2042, | 34932,   | 619418, | 1747.8510, |
| 4.379707 |         |            | 4.373827 |         |            | 4.367946 |         |            |
| 34857,   | 674656, | 1752.4955, | 34895,   | 648304, | 1750.1423, | 34933,   | 619080, | 1747.7891, |
| 4.379553 |         |            | 4.373672 |         |            | 4.367791 |         |            |
| 34858,   | 672416, | 1752.4336, | 34896,   | 646038, | 1750.0804, | 34934,   | 617402, | 1747.7272, |
| 4.379398 |         |            | 4.373517 |         |            | 4.367636 |         |            |
| 34859,   | 670056, | 1752.3717, | 34897,   | 643876, | 1750.0184, | 34935,   | 616070, | 1747.6652, |
| 4.379243 |         |            | 4.373362 |         |            | 4.367482 |         |            |
| 34860,   | 669292, | 1752.3097, | 34898,   | 643522, | 1749.9565, | 34936,   | 616486, | 1747.6033, |
| 4.379088 |         |            | 4.373208 |         |            | 4.367327 |         |            |
| 34861,   | 670070, | 1752.2478, | 34899,   | 644456, | 1749.8946, | 34937,   | 618054, | 1747.5414, |
| 4.378934 |         |            | 4.373053 |         |            | 4.367172 |         |            |
| 34862,   | 670704, | 1752.1859, | 34900,   | 644536, | 1749.8327, | 34938,   | 618864, | 1747.4794, |
| 4.378779 |         |            | 4.372898 |         |            | 4.367017 |         |            |
| 34863,   | 669924, | 1752.1240, | 34901,   | 642478, | 1749.7707, | 34939,   | 617908, | 1747.4175, |
| 4.378624 |         |            | 4.372743 |         |            | 4.366863 |         |            |
| 34864,   | 668266, | 1752.0620, | 34902,   | 639410, | 1749.7088, | 34940,   | 616212, | 1747.3556, |
| 4.378469 |         |            | 4.372589 |         |            | 4.366708 |         |            |
| 34865,   | 667260, | 1752.0001, | 34903,   | 637550, | 1749.6469, | 34941,   | 615514, | 1747.2937, |
| 4.378315 |         |            | 4.372434 |         |            | 4.366553 |         |            |
| 34866,   | 667430, | 1751.9382, | 34904,   | 637672, | 1749.5850, | 34942,   | 616142, | 1747.2317, |
| 4.378160 |         |            | 4.372279 |         |            | 4.366398 |         |            |
| 34867,   | 667614, | 1751.8763, | 34905,   | 638298, | 1749.5230, | 34943,   | 616664, | 1747.1698, |
| 4.378005 |         |            | 4.372124 |         |            | 4.366244 |         |            |
| 34868,   | 666408, | 1751.8143, | 34906,   | 637498, | 1749.4611, | 34944,   | 615702, | 1747.1079, |
| 4.377850 |         |            | 4.371970 |         |            | 4.366089 |         |            |
| 34869,   | 664006, | 1751.7524, | 34907,   | 635186, | 1749.3992, | 34945,   | 613678, | 1747.0460, |
| 4.377696 |         |            | 4.371815 |         |            | 4.365934 |         |            |
| 34870,   | 662048, | 1751.6905, | 34908,   | 633138, | 1749.3373, | 34946,   | 612318, | 1746.9840, |
| 4.377541 |         |            | 4.371660 |         |            | 4.365779 |         |            |
| 34871,   | 661696, | 1751.6285, | 34909,   | 632848, | 1749.2753, | 34947,   | 612490, | 1746.9221, |
| 4.377386 |         |            | 4.371505 |         |            | 4.365624 |         |            |
| 34872,   | 662246, | 1751.5666, | 34910,   | 633770, | 1749.2134, | 34948,   | 613012, | 1746.8602, |
| 4.377231 |         |            | 4.371351 |         |            | 4.365470 |         |            |
| 34873,   | 662020, | 1751.5047, | 34911,   | 634032, | 1749.1515, | 34949,   | 612004, | 1746.7983, |
| 4.377077 |         |            | 4.371196 |         |            | 4.365315 |         |            |
| 34874,   | 660440, | 1751.4428, | 34912,   | 632728, | 1749.0895, | 34950,   | 609162, | 1746.7363, |
| 4.376922 |         |            | 4.371041 |         |            | 4.365160 |         |            |
| 34875,   | 658786, | 1751.3808, | 34913,   | 630934, | 1749.0276, | 34951,   | 606300, | 1746.6744, |
| 4.376767 |         |            | 4.370886 |         |            | 4.365005 |         |            |
| 34876,   | 658628, | 1751.3189, | 34914,   | 630296, | 1748.9657, | 34952,   | 605384, | 1746.6125, |
| 4.376612 |         |            | 4.370731 |         |            | 4.364851 |         |            |
| 34877,   | 659780, | 1751.2570, | 34915,   | 630946, | 1748.9038, | 34953,   | 606304, | 1746.5505, |
| 4.376458 |         |            | 4.370577 |         |            | 4.364696 |         |            |
| 34878,   | 660352, | 1751.1951, | 34916,   | 631312, | 1748.8418, | 34954,   | 607046, | 1746.4886, |
| 4.376303 |         |            | 4.370422 |         |            | 4.364541 |         |            |
| 34879,   | 658910, | 1751.1331, | 34917,   | 630060, | 1748.7799, | 34955,   | 605980, | 1746.4267, |
| 4.376148 |         |            | 4.370267 |         |            | 4.364386 |         |            |
| 34880,   | 656248, | 1751.0712, | 34918,   | 627798, | 1748.7180, | 34956,   | 603698, | 1746.3648, |
| 4.375993 |         |            | 4.370112 |         |            | 4.364232 |         |            |
| 34881,   | 654578, | 1751.0093, | 34919,   | 626434, | 1748.6561, | 34957,   | 602194, | 1746.3028, |
| 4.375839 |         |            | 4.369958 |         |            | 4.364077 |         |            |
| 34882,   | 655030, | 1750.9474, | 34920,   | 626908, | 1748.5941, | 34958,   | 602466, | 1746.2409, |
| 4.375684 |         |            | 4.369803 |         |            | 4.363922 |         |            |
| 34883,   | 656336, | 1750.8854, | 34921,   | 628020, | 1748.5322, | 34959,   | 603386, | 1746.1790, |
| 4.375529 |         |            | 4.369648 |         |            | 4.363767 |         |            |
| 34884,   | 656306, | 1750.8235, | 34922,   | 627822, | 1748.4703, | 34960,   | 603072, | 1746.1171, |
| 4.375374 |         |            | 4.369493 |         |            | 4.363613 |         |            |
| 34885,   | 654338, | 1750.7616, | 34923,   | 625882, | 1748.4083, | 34961,   | 601118, | 1746.0551, |
| 4.375219 |         |            | 4.369339 |         |            | 4.363458 |         |            |
| 34886,   | 652072, | 1750.6996, | 34924,   | 623774, | 1748.3464, | 34962,   | 599020, | 1745.9932, |
| 4.375065 |         |            | 4.369184 |         |            | 4.363303 |         |            |
| 34887,   | 651402, | 1750.6377, | 34925,   | 623178, | 1748.2845, | 34963,   | 598310, | 1745.9313, |
| 4.374910 |         |            | 4.369029 |         |            | 4.363148 |         |            |
| 34888,   | 652222, | 1750.5758, | 34926,   | 623864, | 1748.2226, | 34964,   | 598736, | 1745.8693, |
| 4.374755 |         |            | 4.368874 |         |            | 4.362994 |         |            |
| 34889,   | 652604, | 1750.5139, | 34927,   | 623978, | 1748.1606, | 34965,   | 598646, | 1745.8074, |
| 4.374600 |         |            | 4.368720 |         |            | 4.362839 |         |            |
| 34890,   | 651144, | 1750.4519, | 34928,   | 622286, | 1748.0987, | 34966,   | 597046, | 1745.7455, |
| 4.374446 |         |            | 4.368565 |         |            | 4.362684 |         |            |
| 34891,   | 648674, | 1750.3900, | 34929,   | 619682, | 1748.0368, | 34967,   | 594838, | 1745.6836, |
| 4.374291 |         |            | 4.368410 |         |            | 4.362529 |         |            |
| 34892,   | 647278, | 1750.3281, | 34930,   | 618172, | 1747.9749, | 34968,   | 593712, | 1745.6216, |
| 4.374136 |         |            | 4.368255 |         |            | 4.362375 |         |            |
| 34893,   | 647810, | 1750.2662, | 34931,   | 618524, | 1747.9129, | 34969,   | 594064, | 1745.5597, |
| 4.373981 |         |            | 4.368101 |         |            | 4.362220 |         |            |

|          |         |            |          |         |            |          |         |            |
|----------|---------|------------|----------|---------|------------|----------|---------|------------|
| 34970,   | 594548, | 1745.4978, | 35008,   | 568976, | 1743.1446, | 35046,   | 546608, | 1740.7913, |
| 4.362065 |         |            | 4.356184 |         |            | 4.350303 |         |            |
| 34971,   | 593782, | 1745.4359, | 35009,   | 567370, | 1743.0826, | 35047,   | 546160, | 1740.7294, |
| 4.361910 |         |            | 4.356030 |         |            | 4.350149 |         |            |
| 34972,   | 592128, | 1745.3739, | 35010,   | 564890, | 1743.0207, | 35048,   | 544596, | 1740.6675, |
| 4.361756 |         |            | 4.355875 |         |            | 4.349994 |         |            |
| 34973,   | 591352, | 1745.3120, | 35011,   | 563512, | 1742.9588, | 35049,   | 543560, | 1740.6056, |
| 4.361601 |         |            | 4.355720 |         |            | 4.349839 |         |            |
| 34974,   | 592456, | 1745.2501, | 35012,   | 564298, | 1742.8969, | 35050,   | 543988, | 1740.5436, |
| 4.361446 |         |            | 4.355565 |         |            | 4.349684 |         |            |
| 34975,   | 594314, | 1745.1882, | 35013,   | 566056, | 1742.8349, | 35051,   | 545036, | 1740.4817, |
| 4.361291 |         |            | 4.355410 |         |            | 4.349530 |         |            |
| 34976,   | 594804, | 1745.1262, | 35014,   | 566650, | 1742.7730, | 35052,   | 545130, | 1740.4198, |
| 4.361137 |         |            | 4.355256 |         |            | 4.349375 |         |            |
| 34977,   | 593152, | 1745.0643, | 35015,   | 565358, | 1742.7111, | 35053,   | 543870, | 1740.3579, |
| 4.360982 |         |            | 4.355101 |         |            | 4.349220 |         |            |
| 34978,   | 590812, | 1745.0024, | 35016,   | 563566, | 1742.6491, | 35054,   | 542426, | 1740.2959, |
| 4.360827 |         |            | 4.354946 |         |            | 4.349065 |         |            |
| 34979,   | 589800, | 1744.9404, | 35017,   | 563000, | 1742.5872, | 35055,   | 542062, | 1740.2340, |
| 4.360672 |         |            | 4.354791 |         |            | 4.348911 |         |            |
| 34980,   | 590472, | 1744.8785, | 35018,   | 563654, | 1742.5253, | 35056,   | 542582, | 1740.1721, |
| 4.360517 |         |            | 4.354637 |         |            | 4.348756 |         |            |
| 34981,   | 591286, | 1744.8166, | 35019,   | 563890, | 1742.4634, | 35057,   | 542640, | 1740.1101, |
| 4.360363 |         |            | 4.354482 |         |            | 4.348601 |         |            |
| 34982,   | 590766, | 1744.7547, | 35020,   | 562516, | 1742.4014, | 35058,   | 541488, | 1740.0482, |
| 4.360208 |         |            | 4.354327 |         |            | 4.348446 |         |            |
| 34983,   | 589210, | 1744.6927, | 35021,   | 560328, | 1742.3395, | 35059,   | 539980, | 1739.9863, |
| 4.360053 |         |            | 4.354172 |         |            | 4.348292 |         |            |
| 34984,   | 588196, | 1744.6308, | 35022,   | 559146, | 1742.2776, | 35060,   | 539532, | 1739.9244, |
| 4.359898 |         |            | 4.354018 |         |            | 4.348137 |         |            |
| 34985,   | 588508, | 1744.5689, | 35023,   | 559566, | 1742.2157, | 35061,   | 540320, | 1739.8624, |
| 4.359744 |         |            | 4.353863 |         |            | 4.347982 |         |            |
| 34986,   | 589114, | 1744.5070, | 35024,   | 560098, | 1742.1537, | 35062,   | 540976, | 1739.8005, |
| 4.359589 |         |            | 4.353708 |         |            | 4.347827 |         |            |
| 34987,   | 588426, | 1744.4450, | 35025,   | 558874, | 1742.0918, | 35063,   | 540172, | 1739.7386, |
| 4.359434 |         |            | 4.353553 |         |            | 4.347673 |         |            |
| 34988,   | 586262, | 1744.3831, | 35026,   | 555878, | 1742.0299, | 35064,   | 538300, | 1739.6767, |
| 4.359279 |         |            | 4.353399 |         |            | 4.347518 |         |            |
| 34989,   | 584118, | 1744.3212, | 35027,   | 553098, | 1741.9680, | 35065,   | 537084, | 1739.6147, |
| 4.359125 |         |            | 4.353244 |         |            | 4.347363 |         |            |
| 34990,   | 583334, | 1744.2592, | 35028,   | 552348, | 1741.9060, | 35066,   | 537528, | 1739.5528, |
| 4.358970 |         |            | 4.353089 |         |            | 4.347208 |         |            |
| 34991,   | 583430, | 1744.1973, | 35029,   | 553242, | 1741.8441, | 35067,   | 538660, | 1739.4909, |
| 4.358815 |         |            | 4.352934 |         |            | 4.347054 |         |            |
| 34992,   | 582652, | 1744.1354, | 35030,   | 553738, | 1741.7822, | 35068,   | 538574, | 1739.4289, |
| 4.358660 |         |            | 4.352780 |         |            | 4.346899 |         |            |
| 34993,   | 580168, | 1744.0735, | 35031,   | 552496, | 1741.7202, | 35069,   | 536602, | 1739.3670, |
| 4.358506 |         |            | 4.352625 |         |            | 4.346744 |         |            |
| 34994,   | 577204, | 1744.0115, | 35032,   | 550384, | 1741.6583, | 35070,   | 534126, | 1739.3051, |
| 4.358351 |         |            | 4.352470 |         |            | 4.346589 |         |            |
| 34995,   | 575774, | 1743.9496, | 35033,   | 549302, | 1741.5964, | 35071,   | 532950, | 1739.2432, |
| 4.358196 |         |            | 4.352315 |         |            | 4.346435 |         |            |
| 34996,   | 576320, | 1743.8877, | 35034,   | 549870, | 1741.5345, | 35072,   | 533254, | 1739.1812, |
| 4.358041 |         |            | 4.352161 |         |            | 4.346280 |         |            |
| 34997,   | 577212, | 1743.8258, | 35035,   | 550688, | 1741.4725, | 35073,   | 533464, | 1739.1193, |
| 4.357887 |         |            | 4.352006 |         |            | 4.346125 |         |            |
| 34998,   | 576602, | 1743.7638, | 35036,   | 550014, | 1741.4106, | 35074,   | 532152, | 1739.0574, |
| 4.357732 |         |            | 4.351851 |         |            | 4.345970 |         |            |
| 34999,   | 574558, | 1743.7019, | 35037,   | 547846, | 1741.3487, | 35075,   | 529766, | 1738.9955, |
| 4.357577 |         |            | 4.351696 |         |            | 4.345816 |         |            |
| 35000,   | 572934, | 1743.6400, | 35038,   | 545916, | 1741.2868, | 35076,   | 528050, | 1738.9335, |
| 4.357422 |         |            | 4.351542 |         |            | 4.345661 |         |            |
| 35001,   | 573128, | 1743.5781, | 35039,   | 545652, | 1741.2248, | 35077,   | 527970, | 1738.8716, |
| 4.357268 |         |            | 4.351387 |         |            | 4.345506 |         |            |
| 35002,   | 574384, | 1743.5161, | 35040,   | 546570, | 1741.1629, | 35078,   | 528588, | 1738.8097, |
| 4.357113 |         |            | 4.351232 |         |            | 4.345351 |         |            |
| 35003,   | 574654, | 1743.4542, | 35041,   | 546950, | 1741.1010, | 35079,   | 528242, | 1738.7478, |
| 4.356958 |         |            | 4.351077 |         |            | 4.345196 |         |            |
| 35004,   | 572966, | 1743.3923, | 35042,   | 545950, | 1741.0390, | 35080,   | 526554, | 1738.6858, |
| 4.356803 |         |            | 4.350923 |         |            | 4.345042 |         |            |
| 35005,   | 570500, | 1743.3303, | 35043,   | 544586, | 1740.9771, | 35081,   | 524846, | 1738.6239, |
| 4.356649 |         |            | 4.350768 |         |            | 4.344887 |         |            |
| 35006,   | 569108, | 1743.2684, | 35044,   | 544410, | 1740.9152, | 35082,   | 524464, | 1738.5620, |
| 4.356494 |         |            | 4.350613 |         |            | 4.344732 |         |            |
| 35007,   | 569102, | 1743.2065, | 35045,   | 545574, | 1740.8533, | 35083,   | 525078, | 1738.5000, |
| 4.356339 |         |            | 4.350458 |         |            | 4.344577 |         |            |

|          |         |            |          |         |            |          |         |            |
|----------|---------|------------|----------|---------|------------|----------|---------|------------|
| 35084,   | 525038, | 1738.4381, | 35122,   | 505908, | 1736.0849, | 35160,   | 483990, | 1733.7317, |
| 4.344423 |         |            | 4.338542 |         |            | 4.332661 |         |            |
| 35085,   | 523434, | 1738.3762, | 35123,   | 504222, | 1736.0230, | 35161,   | 482572, | 1733.6697, |
| 4.344268 |         |            | 4.338387 |         |            | 4.332506 |         |            |
| 35086,   | 521296, | 1738.3143, | 35124,   | 502130, | 1735.9610, | 35162,   | 480988, | 1733.6078, |
| 4.344113 |         |            | 4.338232 |         |            | 4.332352 |         |            |
| 35087,   | 520494, | 1738.2523, | 35125,   | 501404, | 1735.8991, | 35163,   | 480734, | 1733.5459, |
| 4.343958 |         |            | 4.338078 |         |            | 4.332197 |         |            |
| 35088,   | 521530, | 1738.1904, | 35126,   | 502440, | 1735.8372, | 35164,   | 481890, | 1733.4840, |
| 4.343804 |         |            | 4.337923 |         |            | 4.332042 |         |            |
| 35089,   | 522894, | 1738.1285, | 35127,   | 503760, | 1735.7753, | 35165,   | 482948, | 1733.4220, |
| 4.343649 |         |            | 4.337768 |         |            | 4.331887 |         |            |
| 35090,   | 522762, | 1738.0666, | 35128,   | 503738, | 1735.7133, | 35166,   | 482510, | 1733.3601, |
| 4.343494 |         |            | 4.337613 |         |            | 4.331733 |         |            |
| 35091,   | 521074, | 1738.0046, | 35129,   | 502476, | 1735.6514, | 35167,   | 480864, | 1733.2982, |
| 4.343339 |         |            | 4.337459 |         |            | 4.331578 |         |            |
| 35092,   | 519540, | 1737.9427, | 35130,   | 501594, | 1735.5895, | 35168,   | 479502, | 1733.2363, |
| 4.343185 |         |            | 4.337304 |         |            | 4.331423 |         |            |
| 35093,   | 519608, | 1737.8808, | 35131,   | 502212, | 1735.5276, | 35169,   | 479278, | 1733.1743, |
| 4.343030 |         |            | 4.337149 |         |            | 4.331268 |         |            |
| 35094,   | 520724, | 1737.8188, | 35132,   | 503538, | 1735.4656, | 35170,   | 479418, | 1733.1124, |
| 4.342875 |         |            | 4.336994 |         |            | 4.331114 |         |            |
| 35095,   | 520992, | 1737.7569, | 35133,   | 503756, | 1735.4037, | 35171,   | 478662, | 1733.0505, |
| 4.342720 |         |            | 4.336840 |         |            | 4.330959 |         |            |
| 35096,   | 519396, | 1737.6950, | 35134,   | 502164, | 1735.3418, | 35172,   | 477034, | 1732.9886, |
| 4.342566 |         |            | 4.336685 |         |            | 4.330804 |         |            |
| 35097,   | 516932, | 1737.6331, | 35135,   | 500016, | 1735.2798, | 35173,   | 476038, | 1732.9266, |
| 4.342411 |         |            | 4.336530 |         |            | 4.330649 |         |            |
| 35098,   | 515420, | 1737.5711, | 35136,   | 499058, | 1735.2179, | 35174,   | 476884, | 1732.8647, |
| 4.342256 |         |            | 4.336375 |         |            | 4.330495 |         |            |
| 35099,   | 515422, | 1737.5092, | 35137,   | 499526, | 1735.1560, | 35175,   | 478868, | 1732.8028, |
| 4.342101 |         |            | 4.336221 |         |            | 4.330340 |         |            |
| 35100,   | 515752, | 1737.4473, | 35138,   | 499956, | 1735.0941, | 35176,   | 479966, | 1732.7408, |
| 4.341947 |         |            | 4.336066 |         |            | 4.330185 |         |            |
| 35101,   | 515106, | 1737.3854, | 35139,   | 498958, | 1735.0321, | 35177,   | 479034, | 1732.6789, |
| 4.341792 |         |            | 4.335911 |         |            | 4.330030 |         |            |
| 35102,   | 513722, | 1737.3234, | 35140,   | 496830, | 1734.9702, | 35178,   | 477134, | 1732.6170, |
| 4.341637 |         |            | 4.335756 |         |            | 4.329875 |         |            |
| 35103,   | 513056, | 1737.2615, | 35141,   | 495088, | 1734.9083, | 35179,   | 476338, | 1732.5551, |
| 4.341482 |         |            | 4.335602 |         |            | 4.329721 |         |            |
| 35104,   | 513888, | 1737.1996, | 35142,   | 494578, | 1734.8464, | 35180,   | 477370, | 1732.4931, |
| 4.341328 |         |            | 4.335447 |         |            | 4.329566 |         |            |
| 35105,   | 515188, | 1737.1377, | 35143,   | 494482, | 1734.7844, | 35181,   | 478778, | 1732.4312, |
| 4.341173 |         |            | 4.335292 |         |            | 4.329411 |         |            |
| 35106,   | 515228, | 1737.0757, | 35144,   | 493466, | 1734.7225, | 35182,   | 478622, | 1732.3693, |
| 4.341018 |         |            | 4.335137 |         |            | 4.329256 |         |            |
| 35107,   | 513596, | 1737.0138, | 35145,   | 491470, | 1734.6606, | 35183,   | 476682, | 1732.3074, |
| 4.340863 |         |            | 4.334982 |         |            | 4.329102 |         |            |
| 35108,   | 511722, | 1736.9519, | 35146,   | 489944, | 1734.5987, | 35184,   | 474668, | 1732.2454, |
| 4.340709 |         |            | 4.334828 |         |            | 4.328947 |         |            |
| 35109,   | 511216, | 1736.8899, | 35147,   | 490148, | 1734.5367, | 35185,   | 474202, | 1732.1835, |
| 4.340554 |         |            | 4.334673 |         |            | 4.328792 |         |            |
| 35110,   | 511996, | 1736.8280, | 35148,   | 491570, | 1734.4748, | 35186,   | 474988, | 1732.1216, |
| 4.340399 |         |            | 4.334518 |         |            | 4.328637 |         |            |
| 35111,   | 512412, | 1736.7661, | 35149,   | 492416, | 1734.4129, | 35187,   | 475280, | 1732.0596, |
| 4.340244 |         |            | 4.334363 |         |            | 4.328483 |         |            |
| 35112,   | 511268, | 1736.7042, | 35150,   | 491600, | 1734.3509, | 35188,   | 474004, | 1731.9977, |
| 4.340089 |         |            | 4.334209 |         |            | 4.328328 |         |            |
| 35113,   | 509266, | 1736.6422, | 35151,   | 489990, | 1734.2890, | 35189,   | 472002, | 1731.9358, |
| 4.339935 |         |            | 4.334054 |         |            | 4.328173 |         |            |
| 35114,   | 508180, | 1736.5803, | 35152,   | 489274, | 1734.2271, | 35190,   | 470952, | 1731.8739, |
| 4.339780 |         |            | 4.333899 |         |            | 4.328018 |         |            |
| 35115,   | 508738, | 1736.5184, | 35153,   | 489918, | 1734.1652, | 35191,   | 471314, | 1731.8119, |
| 4.339625 |         |            | 4.333744 |         |            | 4.327864 |         |            |
| 35116,   | 509748, | 1736.4565, | 35154,   | 490566, | 1734.1032, | 35192,   | 471762, | 1731.7500, |
| 4.339470 |         |            | 4.333590 |         |            | 4.327709 |         |            |
| 35117,   | 509492, | 1736.3945, | 35155,   | 489616, | 1734.0413, | 35193,   | 470802, | 1731.6881, |
| 4.339316 |         |            | 4.333435 |         |            | 4.327554 |         |            |
| 35118,   | 507746, | 1736.3326, | 35156,   | 487126, | 1733.9794, | 35194,   | 468548, | 1731.6262, |
| 4.339161 |         |            | 4.333280 |         |            | 4.327399 |         |            |
| 35119,   | 505988, | 1736.2707, | 35157,   | 484786, | 1733.9175, | 35195,   | 466586, | 1731.5642, |
| 4.339006 |         |            | 4.333125 |         |            | 4.327245 |         |            |
| 35120,   | 505566, | 1736.2087, | 35158,   | 483962, | 1733.8555, | 35196,   | 466086, | 1731.5023, |
| 4.338851 |         |            | 4.332971 |         |            | 4.327090 |         |            |
| 35121,   | 506084, | 1736.1468, | 35159,   | 484216, | 1733.7936, | 35197,   | 466464, | 1731.4404, |
| 4.338697 |         |            | 4.332816 |         |            | 4.326935 |         |            |



|          |         |            |          |         |            |          |         |            |
|----------|---------|------------|----------|---------|------------|----------|---------|------------|
| 35198,   | 466206, | 1731.3785, | 35236,   | 446876, | 1729.0252, | 35274,   | 430040, | 1726.6720, |
| 4.326780 |         |            | 4.320900 |         |            | 4.315019 |         |            |
| 35199,   | 464768, | 1731.3165, | 35237,   | 445228, | 1728.9633, | 35275,   | 428392, | 1726.6101, |
| 4.326626 |         |            | 4.320745 |         |            | 4.314864 |         |            |
| 35200,   | 463258, | 1731.2546, | 35238,   | 443326, | 1728.9014, | 35276,   | 427046, | 1726.5482, |
| 4.326471 |         |            | 4.320590 |         |            | 4.314709 |         |            |
| 35201,   | 463064, | 1731.1927, | 35239,   | 442540, | 1728.8394, | 35277,   | 427260, | 1726.4862, |
| 4.326316 |         |            | 4.320435 |         |            | 4.314554 |         |            |
| 35202,   | 464098, | 1731.1307, | 35240,   | 442806, | 1728.7775, | 35278,   | 428524, | 1726.4243, |
| 4.326161 |         |            | 4.320280 |         |            | 4.314400 |         |            |
| 35203,   | 464830, | 1731.0688, | 35241,   | 442870, | 1728.7156, | 35279,   | 429182, | 1726.3624, |
| 4.326007 |         |            | 4.320126 |         |            | 4.314245 |         |            |
| 35204,   | 464072, | 1731.0069, | 35242,   | 441950, | 1728.6537, | 35280,   | 428398, | 1726.3004, |
| 4.325852 |         |            | 4.319971 |         |            | 4.314090 |         |            |
| 35205,   | 462376, | 1730.9450, | 35243,   | 440782, | 1728.5917, | 35281,   | 427150, | 1726.2385, |
| 4.325697 |         |            | 4.319816 |         |            | 4.313935 |         |            |
| 35206,   | 461378, | 1730.8830, | 35244,   | 440708, | 1728.5298, | 35282,   | 426998, | 1726.1766, |
| 4.325542 |         |            | 4.319661 |         |            | 4.313781 |         |            |
| 35207,   | 461822, | 1730.8211, | 35245,   | 441898, | 1728.4679, | 35283,   | 428178, | 1726.1147, |
| 4.325387 |         |            | 4.319507 |         |            | 4.313626 |         |            |
| 35208,   | 462664, | 1730.7592, | 35246,   | 442942, | 1728.4060, | 35284,   | 429232, | 1726.0527, |
| 4.325233 |         |            | 4.319352 |         |            | 4.313471 |         |            |
| 35209,   | 462320, | 1730.6973, | 35247,   | 442392, | 1728.3440, | 35285,   | 428764, | 1725.9908, |
| 4.325078 |         |            | 4.319197 |         |            | 4.313316 |         |            |
| 35210,   | 460546, | 1730.6353, | 35248,   | 440504, | 1728.2821, | 35286,   | 427116, | 1725.9289, |
| 4.324923 |         |            | 4.319042 |         |            | 4.313162 |         |            |
| 35211,   | 458718, | 1730.5734, | 35249,   | 438984, | 1728.2202, | 35287,   | 425986, | 1725.8670, |
| 4.324768 |         |            | 4.318888 |         |            | 4.313007 |         |            |
| 35212,   | 458170, | 1730.5115, | 35250,   | 439082, | 1728.1583, | 35288,   | 426398, | 1725.8050, |
| 4.324614 |         |            | 4.318733 |         |            | 4.312852 |         |            |
| 35213,   | 458664, | 1730.4495, | 35251,   | 440156, | 1728.0963, | 35289,   | 427406, | 1725.7431, |
| 4.324459 |         |            | 4.318578 |         |            | 4.312697 |         |            |
| 35214,   | 458774, | 1730.3876, | 35252,   | 440486, | 1728.0344, | 35290,   | 427168, | 1725.6812, |
| 4.324304 |         |            | 4.318423 |         |            | 4.312543 |         |            |
| 35215,   | 457706, | 1730.3257, | 35253,   | 439338, | 1727.9725, | 35291,   | 425062, | 1725.6192, |
| 4.324149 |         |            | 4.318269 |         |            | 4.312388 |         |            |
| 35216,   | 456330, | 1730.2638, | 35254,   | 437812, | 1727.9105, | 35292,   | 422454, | 1725.5573, |
| 4.323995 |         |            | 4.318114 |         |            | 4.312233 |         |            |
| 35217,   | 456106, | 1730.2018, | 35255,   | 437508, | 1727.8486, | 35293,   | 421124, | 1725.4954, |
| 4.323840 |         |            | 4.317959 |         |            | 4.312078 |         |            |
| 35218,   | 457210, | 1730.1399, | 35256,   | 438546, | 1727.7867, | 35294,   | 421272, | 1725.4335, |
| 4.323685 |         |            | 4.317804 |         |            | 4.311924 |         |            |
| 35219,   | 458180, | 1730.0780, | 35257,   | 439358, | 1727.7248, | 35295,   | 421406, | 1725.3715, |
| 4.323530 |         |            | 4.317650 |         |            | 4.311769 |         |            |
| 35220,   | 457578, | 1730.0161, | 35258,   | 438478, | 1727.6628, | 35296,   | 420204, | 1725.3096, |
| 4.323376 |         |            | 4.317495 |         |            | 4.311614 |         |            |
| 35221,   | 455668, | 1729.9541, | 35259,   | 436254, | 1727.6009, | 35297,   | 418132, | 1725.2477, |
| 4.323221 |         |            | 4.317340 |         |            | 4.311459 |         |            |
| 35222,   | 454138, | 1729.8922, | 35260,   | 434416, | 1727.5390, | 35298,   | 416856, | 1725.1858, |
| 4.323066 |         |            | 4.317185 |         |            | 4.311305 |         |            |
| 35223,   | 454108, | 1729.8303, | 35261,   | 434084, | 1727.4771, | 35299,   | 417228, | 1725.1238, |
| 4.322911 |         |            | 4.317031 |         |            | 4.311150 |         |            |
| 35224,   | 454792, | 1729.7684, | 35262,   | 434582, | 1727.4151, | 35300,   | 418232, | 1725.0619, |
| 4.322757 |         |            | 4.316876 |         |            | 4.310995 |         |            |
| 35225,   | 454448, | 1729.7064, | 35263,   | 434364, | 1727.3532, | 35301,   | 418160, | 1725.0000, |
| 4.322602 |         |            | 4.316721 |         |            | 4.310840 |         |            |
| 35226,   | 452458, | 1729.6445, | 35264,   | 432996, | 1727.2913, | 35302,   | 416630, | 1724.9381, |
| 4.322447 |         |            | 4.316566 |         |            | 4.310686 |         |            |
| 35227,   | 450126, | 1729.5826, | 35265,   | 431656, | 1727.2293, | 35303,   | 414968, | 1724.8761, |
| 4.322292 |         |            | 4.316412 |         |            | 4.310531 |         |            |
| 35228,   | 449186, | 1729.5206, | 35266,   | 431656, | 1727.1674, | 35304,   | 414598, | 1724.8142, |
| 4.322138 |         |            | 4.316257 |         |            | 4.310376 |         |            |
| 35229,   | 449816, | 1729.4587, | 35267,   | 432760, | 1727.1055, | 35305,   | 415370, | 1724.7523, |
| 4.321983 |         |            | 4.316102 |         |            | 4.310221 |         |            |
| 35230,   | 450466, | 1729.3968, | 35268,   | 433364, | 1727.0436, | 35306,   | 415798, | 1724.6903, |
| 4.321828 |         |            | 4.315947 |         |            | 4.310066 |         |            |
| 35231,   | 449676, | 1729.3349, | 35269,   | 432382, | 1726.9816, | 35307,   | 414936, | 1724.6284, |
| 4.321673 |         |            | 4.315793 |         |            | 4.309912 |         |            |
| 35232,   | 447752, | 1729.2729, | 35270,   | 430506, | 1726.9197, | 35308,   | 413566, | 1724.5665, |
| 4.321519 |         |            | 4.315638 |         |            | 4.309757 |         |            |
| 35233,   | 446340, | 1729.2110, | 35271,   | 429426, | 1726.8578, | 35309,   | 413240, | 1724.5046, |
| 4.321364 |         |            | 4.315483 |         |            | 4.309602 |         |            |
| 35234,   | 446400, | 1729.1491, | 35272,   | 429796, | 1726.7959, | 35310,   | 414350, | 1724.4426, |
| 4.321209 |         |            | 4.315328 |         |            | 4.309447 |         |            |
| 35235,   | 447114, | 1729.0872, | 35273,   | 430498, | 1726.7339, | 35311,   | 415540, | 1724.3807, |
| 4.321054 |         |            | 4.315173 |         |            | 4.309293 |         |            |

|          |         |            |          |         |            |          |         |            |
|----------|---------|------------|----------|---------|------------|----------|---------|------------|
| 35312,   | 415204, | 1724.3188, | 35350,   | 399194, | 1721.9656, | 35388,   | 380810, | 1719.6123, |
| 4.309138 |         |            | 4.303257 |         |            | 4.297376 |         |            |
| 35313,   | 413332, | 1724.2569, | 35351,   | 397444, | 1721.9036, | 35389,   | 379028, | 1719.5504, |
| 4.308983 |         |            | 4.303102 |         |            | 4.297222 |         |            |
| 35314,   | 411476, | 1724.1949, | 35352,   | 396158, | 1721.8417, | 35390,   | 378112, | 1719.4885, |
| 4.308828 |         |            | 4.302948 |         |            | 4.297067 |         |            |
| 35315,   | 410932, | 1724.1330, | 35353,   | 396482, | 1721.7798, | 35391,   | 378932, | 1719.4266, |
| 4.308674 |         |            | 4.302793 |         |            | 4.296912 |         |            |
| 35316,   | 411310, | 1724.0711, | 35354,   | 397698, | 1721.7179, | 35392,   | 380428, | 1719.3646, |
| 4.308519 |         |            | 4.302638 |         |            | 4.296757 |         |            |
| 35317,   | 411144, | 1724.0091, | 35355,   | 398148, | 1721.6559, | 35393,   | 380804, | 1719.3027, |
| 4.308364 |         |            | 4.302483 |         |            | 4.296603 |         |            |
| 35318,   | 409814, | 1723.9472, | 35356,   | 397200, | 1721.5940, | 35394,   | 379594, | 1719.2408, |
| 4.308209 |         |            | 4.302329 |         |            | 4.296448 |         |            |
| 35319,   | 408382, | 1723.8853, | 35357,   | 395902, | 1721.5321, | 35395,   | 378176, | 1719.1789, |
| 4.308055 |         |            | 4.302174 |         |            | 4.296293 |         |            |
| 35320,   | 408324, | 1723.8234, | 35358,   | 395576, | 1721.4701, | 35396,   | 378124, | 1719.1169, |
| 4.307900 |         |            | 4.302019 |         |            | 4.296138 |         |            |
| 35321,   | 409702, | 1723.7614, | 35359,   | 396082, | 1721.4082, | 35397,   | 379326, | 1719.0550, |
| 4.307745 |         |            | 4.301864 |         |            | 4.295984 |         |            |
| 35322,   | 410950, | 1723.6995, | 35360,   | 395960, | 1721.3463, | 35398,   | 380088, | 1718.9931, |
| 4.307590 |         |            | 4.301710 |         |            | 4.295829 |         |            |
| 35323,   | 410578, | 1723.6376, | 35361,   | 394238, | 1721.2844, | 35399,   | 379104, | 1718.9311, |
| 4.307436 |         |            | 4.301555 |         |            | 4.295674 |         |            |
| 35324,   | 408840, | 1723.5757, | 35362,   | 391770, | 1721.2224, | 35400,   | 376944, | 1718.8692, |
| 4.307281 |         |            | 4.301400 |         |            | 4.295519 |         |            |
| 35325,   | 407358, | 1723.5137, | 35363,   | 390392, | 1721.1605, | 35401,   | 375400, | 1718.8073, |
| 4.307126 |         |            | 4.301245 |         |            | 4.295365 |         |            |
| 35326,   | 407290, | 1723.4518, | 35364,   | 390838, | 1721.0986, | 35402,   | 375482, | 1718.7454, |
| 4.306971 |         |            | 4.301091 |         |            | 4.295210 |         |            |
| 35327,   | 408116, | 1723.3899, | 35365,   | 391882, | 1721.0367, | 35403,   | 376426, | 1718.6834, |
| 4.306817 |         |            | 4.300936 |         |            | 4.295055 |         |            |
| 35328,   | 408472, | 1723.3280, | 35366,   | 391692, | 1720.9747, | 35404,   | 376758, | 1718.6215, |
| 4.306662 |         |            | 4.300781 |         |            | 4.294900 |         |            |
| 35329,   | 407884, | 1723.2660, | 35367,   | 389878, | 1720.9128, | 35405,   | 376084, | 1718.5596, |
| 4.306507 |         |            | 4.300626 |         |            | 4.294745 |         |            |
| 35330,   | 407234, | 1723.2041, | 35368,   | 387820, | 1720.8509, | 35406,   | 375372, | 1718.4977, |
| 4.306352 |         |            | 4.300472 |         |            | 4.294591 |         |            |
| 35331,   | 407446, | 1723.1422, | 35369,   | 386976, | 1720.7890, | 35407,   | 375552, | 1718.4357, |
| 4.306198 |         |            | 4.300317 |         |            | 4.294436 |         |            |
| 35332,   | 408114, | 1723.0802, | 35370,   | 387234, | 1720.7270, | 35408,   | 376210, | 1718.3738, |
| 4.306043 |         |            | 4.300162 |         |            | 4.294281 |         |            |
| 35333,   | 407836, | 1723.0183, | 35371,   | 387216, | 1720.6651, | 35409,   | 376022, | 1718.3119, |
| 4.305888 |         |            | 4.300007 |         |            | 4.294126 |         |            |
| 35334,   | 405944, | 1722.9564, | 35372,   | 386148, | 1720.6032, | 35410,   | 374424, | 1718.2499, |
| 4.305733 |         |            | 4.299852 |         |            | 4.293972 |         |            |
| 35335,   | 403510, | 1722.8945, | 35373,   | 384892, | 1720.5412, | 35411,   | 372428, | 1718.1880, |
| 4.305579 |         |            | 4.299698 |         |            | 4.293817 |         |            |
| 35336,   | 402326, | 1722.8325, | 35374,   | 384910, | 1720.4793, | 35412,   | 371526, | 1718.1261, |
| 4.305424 |         |            | 4.299543 |         |            | 4.293662 |         |            |
| 35337,   | 402958, | 1722.7706, | 35375,   | 386390, | 1720.4174, | 35413,   | 372018, | 1718.0642, |
| 4.305269 |         |            | 4.299388 |         |            | 4.293507 |         |            |
| 35338,   | 404126, | 1722.7087, | 35376,   | 387810, | 1720.3555, | 35414,   | 372718, | 1718.0022, |
| 4.305114 |         |            | 4.299233 |         |            | 4.293353 |         |            |
| 35339,   | 404230, | 1722.6468, | 35377,   | 387592, | 1720.2935, | 35415,   | 372450, | 1717.9403, |
| 4.304959 |         |            | 4.299079 |         |            | 4.293198 |         |            |
| 35340,   | 403114, | 1722.5848, | 35378,   | 385880, | 1720.2316, | 35416,   | 371492, | 1717.8784, |
| 4.304805 |         |            | 4.298924 |         |            | 4.293043 |         |            |
| 35341,   | 402090, | 1722.5229, | 35379,   | 384334, | 1720.1697, | 35417,   | 371202, | 1717.8165, |
| 4.304650 |         |            | 4.298769 |         |            | 4.292888 |         |            |
| 35342,   | 402206, | 1722.4610, | 35380,   | 384212, | 1720.1078, | 35418,   | 372298, | 1717.7545, |
| 4.304495 |         |            | 4.298614 |         |            | 4.292734 |         |            |
| 35343,   | 402850, | 1722.3990, | 35381,   | 384932, | 1720.0458, | 35419,   | 373842, | 1717.6926, |
| 4.304340 |         |            | 4.298460 |         |            | 4.292579 |         |            |
| 35344,   | 402508, | 1722.3371, | 35382,   | 384858, | 1719.9839, | 35420,   | 374258, | 1717.6307, |
| 4.304186 |         |            | 4.298305 |         |            | 4.292424 |         |            |
| 35345,   | 400630, | 1722.2752, | 35383,   | 383320, | 1719.9220, | 35421,   | 373138, | 1717.5688, |
| 4.304031 |         |            | 4.298150 |         |            | 4.292269 |         |            |
| 35346,   | 398494, | 1722.2133, | 35384,   | 381420, | 1719.8600, | 35422,   | 371700, | 1717.5068, |
| 4.303876 |         |            | 4.297995 |         |            | 4.292115 |         |            |
| 35347,   | 397806, | 1722.1513, | 35385,   | 380710, | 1719.7981, | 35423,   | 371320, | 1717.4449, |
| 4.303721 |         |            | 4.297841 |         |            | 4.291960 |         |            |
| 35348,   | 398740, | 1722.0894, | 35386,   | 381296, | 1719.7362, | 35424,   | 371868, | 1717.3830, |
| 4.303567 |         |            | 4.297686 |         |            | 4.291805 |         |            |
| 35349,   | 399714, | 1722.0275, | 35387,   | 381736, | 1719.6743, | 35425,   | 371868, | 1717.3210, |
| 4.303412 |         |            | 4.297531 |         |            | 4.291650 |         |            |

|          |         |            |          |         |            |          |         |            |
|----------|---------|------------|----------|---------|------------|----------|---------|------------|
| 35426,   | 370332, | 1717.2591, | 35464,   | 358446, | 1714.9059, | 35502,   | 343196, | 1712.5527, |
| 4.291496 |         |            | 4.285615 |         |            | 4.279734 |         |            |
| 35427,   | 368052, | 1717.1972, | 35465,   | 356102, | 1714.8440, | 35503,   | 341442, | 1712.4907, |
| 4.291341 |         |            | 4.285460 |         |            | 4.279579 |         |            |
| 35428,   | 366816, | 1717.1353, | 35466,   | 354538, | 1714.7820, | 35504,   | 340452, | 1712.4288, |
| 4.291186 |         |            | 4.285305 |         |            | 4.279424 |         |            |
| 35429,   | 367412, | 1717.0733, | 35467,   | 354710, | 1714.7201, | 35505,   | 340470, | 1712.3669, |
| 4.291031 |         |            | 4.285151 |         |            | 4.279270 |         |            |
| 35430,   | 368740, | 1717.0114, | 35468,   | 355706, | 1714.6582, | 35506,   | 340494, | 1712.3050, |
| 4.290877 |         |            | 4.284996 |         |            | 4.279115 |         |            |
| 35431,   | 369080, | 1716.9495, | 35469,   | 355946, | 1714.5963, | 35507,   | 339676, | 1712.2430, |
| 4.290722 |         |            | 4.284841 |         |            | 4.278960 |         |            |
| 35432,   | 368014, | 1716.8876, | 35470,   | 355032, | 1714.5343, | 35508,   | 338480, | 1712.1811, |
| 4.290567 |         |            | 4.284686 |         |            | 4.278805 |         |            |
| 35433,   | 366756, | 1716.8256, | 35471,   | 354100, | 1714.4724, | 35509,   | 338242, | 1712.1192, |
| 4.290412 |         |            | 4.284531 |         |            | 4.278651 |         |            |
| 35434,   | 366590, | 1716.7637, | 35472,   | 354288, | 1714.4105, | 35510,   | 339494, | 1712.0573, |
| 4.290258 |         |            | 4.284377 |         |            | 4.278496 |         |            |
| 35435,   | 367330, | 1716.7018, | 35473,   | 355322, | 1714.3486, | 35511,   | 341198, | 1711.9953, |
| 4.290103 |         |            | 4.284222 |         |            | 4.278341 |         |            |
| 35436,   | 367560, | 1716.6398, | 35474,   | 355816, | 1714.2866, | 35512,   | 341760, | 1711.9334, |
| 4.289948 |         |            | 4.284067 |         |            | 4.278186 |         |            |
| 35437,   | 366386, | 1716.5779, | 35475,   | 354966, | 1714.2247, | 35513,   | 340806, | 1711.8715, |
| 4.289793 |         |            | 4.283912 |         |            | 4.278032 |         |            |
| 35438,   | 364478, | 1716.5160, | 35476,   | 353516, | 1714.1628, | 35514,   | 339524, | 1711.8095, |
| 4.289638 |         |            | 4.283758 |         |            | 4.277877 |         |            |
| 35439,   | 363206, | 1716.4541, | 35477,   | 352872, | 1714.1008, | 35515,   | 339216, | 1711.7476, |
| 4.289484 |         |            | 4.283603 |         |            | 4.277722 |         |            |
| 35440,   | 363004, | 1716.3921, | 35478,   | 353388, | 1714.0389, | 35516,   | 339754, | 1711.6857, |
| 4.289329 |         |            | 4.283448 |         |            | 4.277567 |         |            |
| 35441,   | 362944, | 1716.3302, | 35479,   | 353980, | 1713.9770, | 35517,   | 339768, | 1711.6238, |
| 4.289174 |         |            | 4.283293 |         |            | 4.277413 |         |            |
| 35442,   | 362014, | 1716.2683, | 35480,   | 353402, | 1713.9151, | 35518,   | 338390, | 1711.5618, |
| 4.289019 |         |            | 4.283139 |         |            | 4.277258 |         |            |
| 35443,   | 360542, | 1716.2064, | 35481,   | 351736, | 1713.8531, | 35519,   | 336408, | 1711.4999, |
| 4.288865 |         |            | 4.282984 |         |            | 4.277103 |         |            |
| 35444,   | 359870, | 1716.1444, | 35482,   | 350260, | 1713.7912, | 35520,   | 335448, | 1711.4380, |
| 4.288710 |         |            | 4.282829 |         |            | 4.276948 |         |            |
| 35445,   | 360706, | 1716.0825, | 35483,   | 349946, | 1713.7293, | 35521,   | 336090, | 1711.3761, |
| 4.288555 |         |            | 4.282674 |         |            | 4.276794 |         |            |
| 35446,   | 362124, | 1716.0206, | 35484,   | 350372, | 1713.6674, | 35522,   | 337136, | 1711.3141, |
| 4.288400 |         |            | 4.282520 |         |            | 4.276639 |         |            |
| 35447,   | 362536, | 1715.9587, | 35485,   | 350372, | 1713.6054, | 35523,   | 336940, | 1711.2522, |
| 4.288246 |         |            | 4.282365 |         |            | 4.276484 |         |            |
| 35448,   | 361520, | 1715.8967, | 35486,   | 349504, | 1713.5435, | 35524,   | 335254, | 1711.1903, |
| 4.288091 |         |            | 4.282210 |         |            | 4.276329 |         |            |
| 35449,   | 360328, | 1715.8348, | 35487,   | 348572, | 1713.4816, | 35525,   | 333472, | 1711.1284, |
| 4.287936 |         |            | 4.282055 |         |            | 4.276175 |         |            |
| 35450,   | 360400, | 1715.7729, | 35488,   | 348556, | 1713.4196, | 35526,   | 333016, | 1711.0664, |
| 4.287781 |         |            | 4.281901 |         |            | 4.276020 |         |            |
| 35451,   | 361630, | 1715.7109, | 35489,   | 349288, | 1713.3577, | 35527,   | 333760, | 1711.0045, |
| 4.287627 |         |            | 4.281746 |         |            | 4.275865 |         |            |
| 35452,   | 362448, | 1715.6490, | 35490,   | 349584, | 1713.2958, | 35528,   | 334300, | 1710.9426, |
| 4.287472 |         |            | 4.281591 |         |            | 4.275710 |         |            |
| 35453,   | 361676, | 1715.5871, | 35491,   | 348652, | 1713.2339, | 35529,   | 333684, | 1710.8806, |
| 4.287317 |         |            | 4.281436 |         |            | 4.275556 |         |            |
| 35454,   | 359944, | 1715.5252, | 35492,   | 347058, | 1713.1719, | 35530,   | 332496, | 1710.8187, |
| 4.287162 |         |            | 4.281282 |         |            | 4.275401 |         |            |
| 35455,   | 359012, | 1715.4632, | 35493,   | 346092, | 1713.1100, | 35531,   | 332042, | 1710.7568, |
| 4.287008 |         |            | 4.281127 |         |            | 4.275246 |         |            |
| 35456,   | 359704, | 1715.4013, | 35494,   | 346234, | 1713.0481, | 35532,   | 332706, | 1710.6949, |
| 4.286853 |         |            | 4.280972 |         |            | 4.275091 |         |            |
| 35457,   | 360960, | 1715.3394, | 35495,   | 346602, | 1712.9862, | 35533,   | 333488, | 1710.6329, |
| 4.286698 |         |            | 4.280817 |         |            | 4.274936 |         |            |
| 35458,   | 361058, | 1715.2775, | 35496,   | 346060, | 1712.9242, | 35534,   | 333274, | 1710.5710, |
| 4.286543 |         |            | 4.280663 |         |            | 4.274782 |         |            |
| 35459,   | 359662, | 1715.2155, | 35497,   | 344636, | 1712.8623, | 35535,   | 332268, | 1710.5091, |
| 4.286389 |         |            | 4.280508 |         |            | 4.274627 |         |            |
| 35460,   | 358184, | 1715.1536, | 35498,   | 343514, | 1712.8004, | 35536,   | 331784, | 1710.4472, |
| 4.286234 |         |            | 4.280353 |         |            | 4.274472 |         |            |
| 35461,   | 358110, | 1715.0917, | 35499,   | 343592, | 1712.7385, | 35537,   | 332628, | 1710.3852, |
| 4.286079 |         |            | 4.280198 |         |            | 4.274317 |         |            |
| 35462,   | 359196, | 1715.0297, | 35500,   | 344360, | 1712.6765, | 35538,   | 334014, | 1710.3233, |
| 4.285924 |         |            | 4.280043 |         |            | 4.274163 |         |            |
| 35463,   | 359716, | 1714.9678, | 35501,   | 344442, | 1712.6146, | 35539,   | 334380, | 1710.2614, |
| 4.285770 |         |            | 4.279889 |         |            | 4.274008 |         |            |

|          |         |            |          |         |            |          |         |            |
|----------|---------|------------|----------|---------|------------|----------|---------|------------|
| 35540,   | 333180, | 1710.1994, | 35578,   | 318938, | 1707.8462, | 35616,   | 307236, | 1705.4930, |
| 4.273853 |         |            | 4.267972 |         |            | 4.262092 |         |            |
| 35541,   | 331514, | 1710.1375, | 35579,   | 317344, | 1707.7843, | 35617,   | 306150, | 1705.4311, |
| 4.273698 |         |            | 4.267818 |         |            | 4.261937 |         |            |
| 35542,   | 330894, | 1710.0756, | 35580,   | 316704, | 1707.7224, | 35618,   | 306216, | 1705.3692, |
| 4.273544 |         |            | 4.267663 |         |            | 4.261782 |         |            |
| 35543,   | 331550, | 1710.0137, | 35581,   | 317106, | 1707.6604, | 35619,   | 307356, | 1705.3072, |
| 4.273389 |         |            | 4.267508 |         |            | 4.261627 |         |            |
| 35544,   | 332268, | 1709.9517, | 35582,   | 317438, | 1707.5985, | 35620,   | 308266, | 1705.2453, |
| 4.273234 |         |            | 4.267353 |         |            | 4.261473 |         |            |
| 35545,   | 331918, | 1709.8898, | 35583,   | 316832, | 1707.5366, | 35621,   | 308024, | 1705.1834, |
| 4.273079 |         |            | 4.267199 |         |            | 4.261318 |         |            |
| 35546,   | 330788, | 1709.8279, | 35584,   | 315738, | 1707.4747, | 35622,   | 307142, | 1705.1214, |
| 4.272925 |         |            | 4.267044 |         |            | 4.261163 |         |            |
| 35547,   | 330108, | 1709.7660, | 35585,   | 315342, | 1707.4127, | 35623,   | 306866, | 1705.0595, |
| 4.272770 |         |            | 4.266889 |         |            | 4.261008 |         |            |
| 35548,   | 330426, | 1709.7040, | 35586,   | 316068, | 1707.3508, | 35624,   | 307570, | 1704.9976, |
| 4.272615 |         |            | 4.266734 |         |            | 4.260854 |         |            |
| 35549,   | 330802, | 1709.6421, | 35587,   | 317020, | 1707.2889, | 35625,   | 308238, | 1704.9357, |
| 4.272460 |         |            | 4.266580 |         |            | 4.260699 |         |            |
| 35550,   | 329866, | 1709.5802, | 35588,   | 317070, | 1707.2270, | 35626,   | 307708, | 1704.8737, |
| 4.272306 |         |            | 4.266425 |         |            | 4.260544 |         |            |
| 35551,   | 327524, | 1709.5183, | 35589,   | 316240, | 1707.1650, | 35627,   | 306094, | 1704.8118, |
| 4.272151 |         |            | 4.266270 |         |            | 4.260389 |         |            |
| 35552,   | 325216, | 1709.4563, | 35590,   | 315690, | 1707.1031, | 35628,   | 304722, | 1704.7499, |
| 4.271996 |         |            | 4.266115 |         |            | 4.260235 |         |            |
| 35553,   | 324386, | 1709.3944, | 35591,   | 316284, | 1707.0412, | 35629,   | 304626, | 1704.6880, |
| 4.271841 |         |            | 4.265961 |         |            | 4.260080 |         |            |
| 35554,   | 324920, | 1709.3325, | 35592,   | 317462, | 1706.9793, | 35630,   | 305358, | 1704.6260, |
| 4.271687 |         |            | 4.265806 |         |            | 4.259925 |         |            |
| 35555,   | 325352, | 1709.2705, | 35593,   | 317886, | 1706.9173, | 35631,   | 305600, | 1704.5641, |
| 4.271532 |         |            | 4.265651 |         |            | 4.259770 |         |            |
| 35556,   | 324604, | 1709.2086, | 35594,   | 317002, | 1706.8554, | 35632,   | 304738, | 1704.5022, |
| 4.271377 |         |            | 4.265496 |         |            | 4.259615 |         |            |
| 35557,   | 323194, | 1709.1467, | 35595,   | 315758, | 1706.7935, | 35633,   | 303580, | 1704.4402, |
| 4.271222 |         |            | 4.265342 |         |            | 4.259461 |         |            |
| 35558,   | 322546, | 1709.0848, | 35596,   | 315470, | 1706.7315, | 35634,   | 303282, | 1704.3783, |
| 4.271068 |         |            | 4.265187 |         |            | 4.259306 |         |            |
| 35559,   | 323258, | 1709.0228, | 35597,   | 316230, | 1706.6696, | 35635,   | 303864, | 1704.3164, |
| 4.270913 |         |            | 4.265032 |         |            | 4.259151 |         |            |
| 35560,   | 324442, | 1708.9609, | 35598,   | 316776, | 1706.6077, | 35636,   | 304116, | 1704.2545, |
| 4.270758 |         |            | 4.264877 |         |            | 4.258996 |         |            |
| 35561,   | 324820, | 1708.8990, | 35599,   | 316006, | 1706.5458, | 35637,   | 303048, | 1704.1925, |
| 4.270603 |         |            | 4.264722 |         |            | 4.258842 |         |            |
| 35562,   | 324242, | 1708.8371, | 35600,   | 314394, | 1706.4838, | 35638,   | 301176, | 1704.1306, |
| 4.270449 |         |            | 4.264568 |         |            | 4.258687 |         |            |
| 35563,   | 323754, | 1708.7751, | 35601,   | 313498, | 1706.4219, | 35639,   | 300064, | 1704.0687, |
| 4.270294 |         |            | 4.264413 |         |            | 4.258532 |         |            |
| 35564,   | 324180, | 1708.7132, | 35602,   | 314224, | 1706.3600, | 35640,   | 300590, | 1704.0068, |
| 4.270139 |         |            | 4.264258 |         |            | 4.258377 |         |            |
| 35565,   | 325000, | 1708.6513, | 35603,   | 315720, | 1706.2981, | 35641,   | 301994, | 1703.9448, |
| 4.269984 |         |            | 4.264103 |         |            | 4.258223 |         |            |
| 35566,   | 324914, | 1708.5893, | 35604,   | 316322, | 1706.2361, | 35642,   | 302748, | 1703.8829, |
| 4.269829 |         |            | 4.263949 |         |            | 4.258068 |         |            |
| 35567,   | 323452, | 1708.5274, | 35605,   | 315376, | 1706.1742, | 35643,   | 302238, | 1703.8210, |
| 4.269675 |         |            | 4.263794 |         |            | 4.257913 |         |            |
| 35568,   | 321634, | 1708.4655, | 35606,   | 313836, | 1706.1123, | 35644,   | 301336, | 1703.7591, |
| 4.269520 |         |            | 4.263639 |         |            | 4.257758 |         |            |
| 35569,   | 320860, | 1708.4036, | 35607,   | 312986, | 1706.0503, | 35645,   | 301208, | 1703.6971, |
| 4.269365 |         |            | 4.263484 |         |            | 4.257604 |         |            |
| 35570,   | 321300, | 1708.3416, | 35608,   | 312838, | 1705.9884, | 35646,   | 301916, | 1703.6352, |
| 4.269210 |         |            | 4.263330 |         |            | 4.257449 |         |            |
| 35571,   | 321740, | 1708.2797, | 35609,   | 312182, | 1705.9265, | 35647,   | 302400, | 1703.5733, |
| 4.269056 |         |            | 4.263175 |         |            | 4.257294 |         |            |
| 35572,   | 321040, | 1708.2178, | 35610,   | 310182, | 1705.8646, | 35648,   | 301826, | 1703.5113, |
| 4.268901 |         |            | 4.263020 |         |            | 4.257139 |         |            |
| 35573,   | 319518, | 1708.1559, | 35611,   | 307614, | 1705.8026, | 35649,   | 300554, | 1703.4494, |
| 4.268746 |         |            | 4.262865 |         |            | 4.256985 |         |            |
| 35574,   | 318570, | 1708.0939, | 35612,   | 306158, | 1705.7407, | 35650,   | 299624, | 1703.3875, |
| 4.268591 |         |            | 4.262711 |         |            | 4.256830 |         |            |
| 35575,   | 319000, | 1708.0320, | 35613,   | 306564, | 1705.6788, | 35651,   | 299392, | 1703.3256, |
| 4.268437 |         |            | 4.262556 |         |            | 4.256675 |         |            |
| 35576,   | 320034, | 1707.9701, | 35614,   | 307788, | 1705.6169, | 35652,   | 299112, | 1703.2636, |
| 4.268282 |         |            | 4.262401 |         |            | 4.256520 |         |            |
| 35577,   | 320174, | 1707.9082, | 35615,   | 308162, | 1705.5549, | 35653,   | 297938, | 1703.2017, |
| 4.268127 |         |            | 4.262246 |         |            | 4.256366 |         |            |

|          |         |            |          |         |            |          |         |            |
|----------|---------|------------|----------|---------|------------|----------|---------|------------|
| 35654,   | 296146, | 1703.1398, | 35692,   | 288060, | 1700.7866, | 35730,   | 275062, | 1698.4333, |
| 4.256211 |         |            | 4.250330 |         |            | 4.244449 |         |            |
| 35655,   | 294976, | 1703.0779, | 35693,   | 287634, | 1700.7246, | 35731,   | 273906, | 1698.3714, |
| 4.256056 |         |            | 4.250175 |         |            | 4.244294 |         |            |
| 35656,   | 295212, | 1703.0159, | 35694,   | 288458, | 1700.6627, | 35732,   | 273778, | 1698.3095, |
| 4.255901 |         |            | 4.250021 |         |            | 4.244140 |         |            |
| 35657,   | 296188, | 1702.9540, | 35695,   | 289846, | 1700.6008, | 35733,   | 274294, | 1698.2476, |
| 4.255747 |         |            | 4.249866 |         |            | 4.243985 |         |            |
| 35658,   | 296518, | 1702.8921, | 35696,   | 290294, | 1700.5389, | 35734,   | 274470, | 1698.1856, |
| 4.255592 |         |            | 4.249711 |         |            | 4.243830 |         |            |
| 35659,   | 295654, | 1702.8301, | 35697,   | 289220, | 1700.4769, | 35735,   | 273978, | 1698.1237, |
| 4.255437 |         |            | 4.249556 |         |            | 4.243675 |         |            |
| 35660,   | 294496, | 1702.7682, | 35698,   | 287606, | 1700.4150, | 35736,   | 273452, | 1698.0618, |
| 4.255282 |         |            | 4.249401 |         |            | 4.243521 |         |            |
| 35661,   | 294294, | 1702.7063, | 35699,   | 286840, | 1700.3531, | 35737,   | 273558, | 1697.9998, |
| 4.255128 |         |            | 4.249247 |         |            | 4.243366 |         |            |
| 35662,   | 295114, | 1702.6444, | 35700,   | 287132, | 1700.2911, | 35738,   | 274016, | 1697.9379, |
| 4.254973 |         |            | 4.249092 |         |            | 4.243211 |         |            |
| 35663,   | 295750, | 1702.5824, | 35701,   | 287354, | 1700.2292, | 35739,   | 273930, | 1697.8760, |
| 4.254818 |         |            | 4.248937 |         |            | 4.243056 |         |            |
| 35664,   | 295198, | 1702.5205, | 35702,   | 286434, | 1700.1673, | 35740,   | 272998, | 1697.8141, |
| 4.254663 |         |            | 4.248782 |         |            | 4.242902 |         |            |
| 35665,   | 293914, | 1702.4586, | 35703,   | 284636, | 1700.1054, | 35741,   | 272092, | 1697.7521, |
| 4.254508 |         |            | 4.248628 |         |            | 4.242747 |         |            |
| 35666,   | 293368, | 1702.3967, | 35704,   | 283178, | 1700.0434, | 35742,   | 272330, | 1697.6902, |
| 4.254354 |         |            | 4.248473 |         |            | 4.242592 |         |            |
| 35667,   | 294358, | 1702.3347, | 35705,   | 282724, | 1699.9815, | 35743,   | 273666, | 1697.6283, |
| 4.254199 |         |            | 4.248318 |         |            | 4.242437 |         |            |
| 35668,   | 296014, | 1702.2728, | 35706,   | 282626, | 1699.9196, | 35744,   | 274728, | 1697.5664, |
| 4.254044 |         |            | 4.248163 |         |            | 4.242283 |         |            |
| 35669,   | 296702, | 1702.2109, | 35707,   | 281830, | 1699.8577, | 35745,   | 274230, | 1697.5044, |
| 4.253889 |         |            | 4.248009 |         |            | 4.242128 |         |            |
| 35670,   | 295726, | 1702.1490, | 35708,   | 280268, | 1699.7957, | 35746,   | 272372, | 1697.4425, |
| 4.253735 |         |            | 4.247854 |         |            | 4.241973 |         |            |
| 35671,   | 293932, | 1702.0870, | 35709,   | 279042, | 1699.7338, | 35747,   | 270588, | 1697.3806, |
| 4.253580 |         |            | 4.247699 |         |            | 4.241818 |         |            |
| 35672,   | 292546, | 1702.0251, | 35710,   | 279132, | 1699.6719, | 35748,   | 269982, | 1697.3187, |
| 4.253425 |         |            | 4.247544 |         |            | 4.241664 |         |            |
| 35673,   | 291796, | 1701.9632, | 35711,   | 280140, | 1699.6099, | 35749,   | 270190, | 1697.2567, |
| 4.253270 |         |            | 4.247390 |         |            | 4.241509 |         |            |
| 35674,   | 290922, | 1701.9012, | 35712,   | 280728, | 1699.5480, | 35750,   | 270008, | 1697.1948, |
| 4.253116 |         |            | 4.247235 |         |            | 4.241354 |         |            |
| 35675,   | 289458, | 1701.8393, | 35713,   | 280150, | 1699.4861, | 35751,   | 268960, | 1697.1329, |
| 4.252961 |         |            | 4.247080 |         |            | 4.241199 |         |            |
| 35676,   | 288098, | 1701.7774, | 35714,   | 279150, | 1699.4242, | 35752,   | 267922, | 1697.0709, |
| 4.252806 |         |            | 4.246925 |         |            | 4.241045 |         |            |
| 35677,   | 287992, | 1701.7155, | 35715,   | 279042, | 1699.3622, | 35753,   | 267970, | 1697.0090, |
| 4.252651 |         |            | 4.246771 |         |            | 4.240890 |         |            |
| 35678,   | 289256, | 1701.6535, | 35716,   | 280096, | 1699.3003, | 35754,   | 268956, | 1696.9471, |
| 4.252497 |         |            | 4.246616 |         |            | 4.240735 |         |            |
| 35679,   | 290616, | 1701.5916, | 35717,   | 281118, | 1699.2384, | 35755,   | 269512, | 1696.8852, |
| 4.252342 |         |            | 4.246461 |         |            | 4.240580 |         |            |
| 35680,   | 290678, | 1701.5297, | 35718,   | 280792, | 1699.1765, | 35756,   | 268586, | 1696.8232, |
| 4.252187 |         |            | 4.246306 |         |            | 4.240426 |         |            |
| 35681,   | 289462, | 1701.4678, | 35719,   | 279188, | 1699.1145, | 35757,   | 266748, | 1696.7613, |
| 4.252032 |         |            | 4.246152 |         |            | 4.240271 |         |            |
| 35682,   | 288326, | 1701.4058, | 35720,   | 277716, | 1699.0526, | 35758,   | 265612, | 1696.6994, |
| 4.251878 |         |            | 4.245997 |         |            | 4.240116 |         |            |
| 35683,   | 288370, | 1701.3439, | 35721,   | 277514, | 1698.9907, | 35759,   | 266068, | 1696.6375, |
| 4.251723 |         |            | 4.245842 |         |            | 4.239961 |         |            |
| 35684,   | 289184, | 1701.2820, | 35722,   | 278220, | 1698.9288, | 35760,   | 267302, | 1696.5755, |
| 4.251568 |         |            | 4.245687 |         |            | 4.239807 |         |            |
| 35685,   | 289376, | 1701.2200, | 35723,   | 278470, | 1698.8668, | 35761,   | 267764, | 1696.5136, |
| 4.251413 |         |            | 4.245533 |         |            | 4.239652 |         |            |
| 35686,   | 288294, | 1701.1581, | 35724,   | 277548, | 1698.8049, | 35762,   | 266940, | 1696.4517, |
| 4.251259 |         |            | 4.245378 |         |            | 4.239497 |         |            |
| 35687,   | 286856, | 1701.0962, | 35725,   | 276192, | 1698.7430, | 35763,   | 265898, | 1696.3897, |
| 4.251104 |         |            | 4.245223 |         |            | 4.239342 |         |            |
| 35688,   | 286506, | 1701.0343, | 35726,   | 275664, | 1698.6810, | 35764,   | 265982, | 1696.3278, |
| 4.250949 |         |            | 4.245068 |         |            | 4.239187 |         |            |
| 35689,   | 287532, | 1700.9723, | 35727,   | 276232, | 1698.6191, | 35765,   | 267224, | 1696.2659, |
| 4.250794 |         |            | 4.244914 |         |            | 4.239033 |         |            |
| 35690,   | 288744, | 1700.9104, | 35728,   | 276852, | 1698.5572, | 35766,   | 268330, | 1696.2040, |
| 4.250640 |         |            | 4.244759 |         |            | 4.238878 |         |            |
| 35691,   | 288876, | 1700.8485, | 35729,   | 276424, | 1698.4953, | 35767,   | 268182, | 1696.1420, |
| 4.250485 |         |            | 4.244604 |         |            | 4.238723 |         |            |

|          |         |            |          |         |            |          |         |            |
|----------|---------|------------|----------|---------|------------|----------|---------|------------|
| 35768,   | 267060, | 1696.0801, | 35806,   | 258646, | 1693.7269, | 35844,   | 248088, | 1691.3737, |
| 4.238568 |         |            | 4.232688 |         |            | 4.226807 |         |            |
| 35769,   | 266198, | 1696.0182, | 35807,   | 258220, | 1693.6650, | 35845,   | 247554, | 1691.3117, |
| 4.238414 |         |            | 4.232533 |         |            | 4.226652 |         |            |
| 35770,   | 266268, | 1695.9563, | 35808,   | 258814, | 1693.6030, | 35846,   | 247778, | 1691.2498, |
| 4.238259 |         |            | 4.232378 |         |            | 4.226497 |         |            |
| 35771,   | 266654, | 1695.8943, | 35809,   | 259270, | 1693.5411, | 35847,   | 247792, | 1691.1879, |
| 4.238104 |         |            | 4.232223 |         |            | 4.226343 |         |            |
| 35772,   | 266338, | 1695.8324, | 35810,   | 258330, | 1693.4792, | 35848,   | 246652, | 1691.1260, |
| 4.237949 |         |            | 4.232069 |         |            | 4.226188 |         |            |
| 35773,   | 265226, | 1695.7705, | 35811,   | 256164, | 1693.4173, | 35849,   | 244700, | 1691.0640, |
| 4.237795 |         |            | 4.231914 |         |            | 4.226033 |         |            |
| 35774,   | 264280, | 1695.7086, | 35812,   | 254230, | 1693.3553, | 35850,   | 243324, | 1691.0021, |
| 4.237640 |         |            | 4.231759 |         |            | 4.225878 |         |            |
| 35775,   | 264298, | 1695.6466, | 35813,   | 253680, | 1693.2934, | 35851,   | 243448, | 1690.9402, |
| 4.237485 |         |            | 4.231604 |         |            | 4.225724 |         |            |
| 35776,   | 264892, | 1695.5847, | 35814,   | 254152, | 1693.2315, | 35852,   | 244556, | 1690.8783, |
| 4.237330 |         |            | 4.231450 |         |            | 4.225569 |         |            |
| 35777,   | 264964, | 1695.5228, | 35815,   | 254410, | 1693.1696, | 35853,   | 245358, | 1690.8163, |
| 4.237176 |         |            | 4.231295 |         |            | 4.225414 |         |            |
| 35778,   | 264060, | 1695.4608, | 35816,   | 253922, | 1693.1076, | 35854,   | 245266, | 1690.7544, |
| 4.237021 |         |            | 4.231140 |         |            | 4.225259 |         |            |
| 35779,   | 262974, | 1695.3989, | 35817,   | 253500, | 1693.0457, | 35855,   | 244950, | 1690.6925, |
| 4.236866 |         |            | 4.230985 |         |            | 4.225105 |         |            |
| 35780,   | 262760, | 1695.3370, | 35818,   | 254190, | 1692.9838, | 35856,   | 245314, | 1690.6305, |
| 4.236711 |         |            | 4.230831 |         |            | 4.224950 |         |            |
| 35781,   | 263354, | 1695.2751, | 35819,   | 255798, | 1692.9218, | 35857,   | 246252, | 1690.5686, |
| 4.236557 |         |            | 4.230676 |         |            | 4.224795 |         |            |
| 35782,   | 263566, | 1695.2131, | 35820,   | 256918, | 1692.8599, | 35858,   | 246746, | 1690.5067, |
| 4.236402 |         |            | 4.230521 |         |            | 4.224640 |         |            |
| 35783,   | 262464, | 1695.1512, | 35821,   | 256488, | 1692.7980, | 35859,   | 246140, | 1690.4448, |
| 4.236247 |         |            | 4.230366 |         |            | 4.224485 |         |            |
| 35784,   | 260588, | 1695.0893, | 35822,   | 255030, | 1692.7361, | 35860,   | 245076, | 1690.3828, |
| 4.236092 |         |            | 4.230212 |         |            | 4.224331 |         |            |
| 35785,   | 259442, | 1695.0274, | 35823,   | 254040, | 1692.6741, | 35861,   | 244804, | 1690.3209, |
| 4.235938 |         |            | 4.230057 |         |            | 4.224176 |         |            |
| 35786,   | 259830, | 1694.9654, | 35824,   | 254230, | 1692.6122, | 35862,   | 245670, | 1690.2590, |
| 4.235783 |         |            | 4.229902 |         |            | 4.224021 |         |            |
| 35787,   | 260922, | 1694.9035, | 35825,   | 254672, | 1692.5503, | 35863,   | 246644, | 1690.1971, |
| 4.235628 |         |            | 4.229747 |         |            | 4.223866 |         |            |
| 35788,   | 261234, | 1694.8416, | 35826,   | 253942, | 1692.4884, | 35864,   | 246446, | 1690.1351, |
| 4.235473 |         |            | 4.229592 |         |            | 4.223712 |         |            |
| 35789,   | 260354, | 1694.7797, | 35827,   | 251944, | 1692.4264, | 35865,   | 245034, | 1690.0732, |
| 4.235319 |         |            | 4.229438 |         |            | 4.223557 |         |            |
| 35790,   | 259416, | 1694.7177, | 35828,   | 250180, | 1692.3645, | 35866,   | 243678, | 1690.0113, |
| 4.235164 |         |            | 4.229283 |         |            | 4.223402 |         |            |
| 35791,   | 259742, | 1694.6558, | 35829,   | 250186, | 1692.3026, | 35867,   | 243474, | 1689.9494, |
| 4.235009 |         |            | 4.229128 |         |            | 4.223247 |         |            |
| 35792,   | 261280, | 1694.5939, | 35830,   | 251784, | 1692.2406, | 35868,   | 244144, | 1689.8874, |
| 4.234854 |         |            | 4.228973 |         |            | 4.223093 |         |            |
| 35793,   | 262636, | 1694.5319, | 35831,   | 253244, | 1692.1787, | 35869,   | 244426, | 1689.8255, |
| 4.234699 |         |            | 4.228819 |         |            | 4.222938 |         |            |
| 35794,   | 262650, | 1694.4700, | 35832,   | 253142, | 1692.1168, | 35870,   | 243656, | 1689.7636, |
| 4.234545 |         |            | 4.228664 |         |            | 4.222783 |         |            |
| 35795,   | 261652, | 1694.4081, | 35833,   | 251822, | 1692.0549, | 35871,   | 242544, | 1689.7016, |
| 4.234390 |         |            | 4.228509 |         |            | 4.222628 |         |            |
| 35796,   | 260926, | 1694.3462, | 35834,   | 250808, | 1691.9929, | 35872,   | 242274, | 1689.6397, |
| 4.234235 |         |            | 4.228354 |         |            | 4.222474 |         |            |
| 35797,   | 261102, | 1694.2842, | 35835,   | 251004, | 1691.9310, | 35873,   | 243016, | 1689.5778, |
| 4.234080 |         |            | 4.228200 |         |            | 4.222319 |         |            |
| 35798,   | 261434, | 1694.2223, | 35836,   | 251718, | 1691.8691, | 35874,   | 243670, | 1689.5159, |
| 4.233926 |         |            | 4.228045 |         |            | 4.222164 |         |            |
| 35799,   | 260808, | 1694.1604, | 35837,   | 251628, | 1691.8072, | 35875,   | 243224, | 1689.4539, |
| 4.233771 |         |            | 4.227890 |         |            | 4.222009 |         |            |
| 35800,   | 259270, | 1694.0985, | 35838,   | 250410, | 1691.7452, | 35876,   | 242036, | 1689.3920, |
| 4.233616 |         |            | 4.227735 |         |            | 4.221855 |         |            |
| 35801,   | 258092, | 1694.0365, | 35839,   | 249104, | 1691.6833, | 35877,   | 241500, | 1689.3301, |
| 4.233461 |         |            | 4.227581 |         |            | 4.221700 |         |            |
| 35802,   | 258340, | 1693.9746, | 35840,   | 248836, | 1691.6214, | 35878,   | 242366, | 1689.2682, |
| 4.233307 |         |            | 4.227426 |         |            | 4.221545 |         |            |
| 35803,   | 259586, | 1693.9127, | 35841,   | 249464, | 1691.5595, | 35879,   | 243790, | 1689.2062, |
| 4.233152 |         |            | 4.227271 |         |            | 4.221390 |         |            |
| 35804,   | 260352, | 1693.8507, | 35842,   | 249834, | 1691.4975, | 35880,   | 244190, | 1689.1443, |
| 4.232997 |         |            | 4.227116 |         |            | 4.221236 |         |            |
| 35805,   | 259804, | 1693.7888, | 35843,   | 249202, | 1691.4356, | 35881,   | 243054, | 1689.0824, |
| 4.232842 |         |            | 4.226962 |         |            | 4.221081 |         |            |

|          |         |            |          |         |            |          |         |            |
|----------|---------|------------|----------|---------|------------|----------|---------|------------|
| 35882,   | 241504, | 1689.0204, | 35920,   | 232394, | 1686.6672, | 35958,   | 224132, | 1684.3140, |
| 4.220926 |         |            | 4.215045 |         |            | 4.209164 |         |            |
| 35883,   | 241012, | 1688.9585, | 35921,   | 232496, | 1686.6053, | 35959,   | 224208, | 1684.2521, |
| 4.220771 |         |            | 4.214891 |         |            | 4.209010 |         |            |
| 35884,   | 241744, | 1688.8966, | 35922,   | 233576, | 1686.5434, | 35960,   | 225076, | 1684.1901, |
| 4.220617 |         |            | 4.214736 |         |            | 4.208855 |         |            |
| 35885,   | 242474, | 1688.8347, | 35923,   | 234400, | 1686.4814, | 35961,   | 225322, | 1684.1282, |
| 4.220462 |         |            | 4.214581 |         |            | 4.208700 |         |            |
| 35886,   | 242138, | 1688.7727, | 35924,   | 233910, | 1686.4195, | 35962,   | 224104, | 1684.0663, |
| 4.220307 |         |            | 4.214426 |         |            | 4.208545 |         |            |
| 35887,   | 241134, | 1688.7108, | 35925,   | 232456, | 1686.3576, | 35963,   | 222176, | 1684.0044, |
| 4.220152 |         |            | 4.214271 |         |            | 4.208391 |         |            |
| 35888,   | 240842, | 1688.6489, | 35926,   | 231296, | 1686.2957, | 35964,   | 221088, | 1683.9424, |
| 4.219998 |         |            | 4.214117 |         |            | 4.208236 |         |            |
| 35889,   | 241914, | 1688.5870, | 35927,   | 231060, | 1686.2337, | 35965,   | 221516, | 1683.8805, |
| 4.219843 |         |            | 4.213962 |         |            | 4.208081 |         |            |
| 35890,   | 243410, | 1688.5250, | 35928,   | 231060, | 1686.1718, | 35966,   | 222588, | 1683.8186, |
| 4.219688 |         |            | 4.213807 |         |            | 4.207926 |         |            |
| 35891,   | 243820, | 1688.4631, | 35929,   | 230240, | 1686.1099, | 35967,   | 222976, | 1683.7567, |
| 4.219533 |         |            | 4.213652 |         |            | 4.207772 |         |            |
| 35892,   | 242774, | 1688.4012, | 35930,   | 228616, | 1686.0480, | 35968,   | 222432, | 1683.6947, |
| 4.219378 |         |            | 4.213498 |         |            | 4.207617 |         |            |
| 35893,   | 241402, | 1688.3393, | 35931,   | 227382, | 1685.9860, | 35969,   | 221924, | 1683.6328, |
| 4.219224 |         |            | 4.213343 |         |            | 4.207462 |         |            |
| 35894,   | 240938, | 1688.2773, | 35932,   | 227532, | 1685.9241, | 35970,   | 222358, | 1683.5709, |
| 4.219069 |         |            | 4.213188 |         |            | 4.207307 |         |            |
| 35895,   | 241248, | 1688.2154, | 35933,   | 228632, | 1685.8622, | 35971,   | 223448, | 1683.5090, |
| 4.218914 |         |            | 4.213033 |         |            | 4.207153 |         |            |
| 35896,   | 241002, | 1688.1535, | 35934,   | 229244, | 1685.8002, | 35972,   | 224078, | 1683.4470, |
| 4.218759 |         |            | 4.212879 |         |            | 4.206998 |         |            |
| 35897,   | 239318, | 1688.0915, | 35935,   | 228540, | 1685.7383, | 35973,   | 223708, | 1683.3851, |
| 4.218605 |         |            | 4.212724 |         |            | 4.206843 |         |            |
| 35898,   | 236890, | 1688.0296, | 35936,   | 227252, | 1685.6764, | 35974,   | 223010, | 1683.3232, |
| 4.218450 |         |            | 4.212569 |         |            | 4.206688 |         |            |
| 35899,   | 235254, | 1687.9677, | 35937,   | 226814, | 1685.6145, | 35975,   | 223030, | 1683.2612, |
| 4.218295 |         |            | 4.212414 |         |            | 4.206534 |         |            |
| 35900,   | 235080, | 1687.9058, | 35938,   | 227754, | 1685.5525, | 35976,   | 223876, | 1683.1993, |
| 4.218140 |         |            | 4.212260 |         |            | 4.206379 |         |            |
| 35901,   | 235480, | 1687.8438, | 35939,   | 229164, | 1685.4906, | 35977,   | 224542, | 1683.1374, |
| 4.217986 |         |            | 4.212105 |         |            | 4.206224 |         |            |
| 35902,   | 235126, | 1687.7819, | 35940,   | 229840, | 1685.4287, | 35978,   | 224122, | 1683.0755, |
| 4.217831 |         |            | 4.211950 |         |            | 4.206069 |         |            |
| 35903,   | 233796, | 1687.7200, | 35941,   | 229636, | 1685.3668, | 35979,   | 222934, | 1683.0135, |
| 4.217676 |         |            | 4.211795 |         |            | 4.205915 |         |            |
| 35904,   | 232538, | 1687.6581, | 35942,   | 229440, | 1685.3048, | 35980,   | 222128, | 1682.9516, |
| 4.217521 |         |            | 4.211641 |         |            | 4.205760 |         |            |
| 35905,   | 232304, | 1687.5961, | 35943,   | 229874, | 1685.2429, | 35981,   | 222310, | 1682.8897, |
| 4.217367 |         |            | 4.211486 |         |            | 4.205605 |         |            |
| 35906,   | 232802, | 1687.5342, | 35944,   | 230408, | 1685.1810, | 35982,   | 222806, | 1682.8278, |
| 4.217212 |         |            | 4.211331 |         |            | 4.205450 |         |            |
| 35907,   | 232914, | 1687.4723, | 35945,   | 229988, | 1685.1191, | 35983,   | 222470, | 1682.7658, |
| 4.217057 |         |            | 4.211176 |         |            | 4.205296 |         |            |
| 35908,   | 232172, | 1687.4103, | 35946,   | 228450, | 1685.0571, | 35984,   | 221122, | 1682.7039, |
| 4.216902 |         |            | 4.211022 |         |            | 4.205141 |         |            |
| 35909,   | 231408, | 1687.3484, | 35947,   | 226932, | 1684.9952, | 35985,   | 219836, | 1682.6420, |
| 4.216748 |         |            | 4.210867 |         |            | 4.204986 |         |            |
| 35910,   | 231746, | 1687.2865, | 35948,   | 226682, | 1684.9333, | 35986,   | 219724, | 1682.5800, |
| 4.216593 |         |            | 4.210712 |         |            | 4.204831 |         |            |
| 35911,   | 233126, | 1687.2246, | 35949,   | 227640, | 1684.8713, | 35987,   | 220660, | 1682.5181, |
| 4.216438 |         |            | 4.210557 |         |            | 4.204677 |         |            |
| 35912,   | 234210, | 1687.1626, | 35950,   | 228476, | 1684.8094, | 35988,   | 221454, | 1682.4562, |
| 4.216283 |         |            | 4.210403 |         |            | 4.204522 |         |            |
| 35913,   | 233854, | 1687.1007, | 35951,   | 228086, | 1684.7475, | 35989,   | 221224, | 1682.3943, |
| 4.216129 |         |            | 4.210248 |         |            | 4.204367 |         |            |
| 35914,   | 232450, | 1687.0388, | 35952,   | 226802, | 1684.6856, | 35990,   | 220358, | 1682.3323, |
| 4.215974 |         |            | 4.210093 |         |            | 4.204212 |         |            |
| 35915,   | 231516, | 1686.9769, | 35953,   | 225924, | 1684.6236, | 35991,   | 219908, | 1682.2704, |
| 4.215819 |         |            | 4.209938 |         |            | 4.204057 |         |            |
| 35916,   | 232016, | 1686.9149, | 35954,   | 226114, | 1684.5617, | 35992,   | 220170, | 1682.2085, |
| 4.215664 |         |            | 4.209784 |         |            | 4.203903 |         |            |
| 35917,   | 233288, | 1686.8530, | 35955,   | 226672, | 1684.4998, | 35993,   | 220260, | 1682.1466, |
| 4.215510 |         |            | 4.209629 |         |            | 4.203748 |         |            |
| 35918,   | 233880, | 1686.7911, | 35956,   | 226420, | 1684.4379, | 35994,   | 219192, | 1682.0846, |
| 4.215355 |         |            | 4.209474 |         |            | 4.203593 |         |            |
| 35919,   | 233268, | 1686.7292, | 35957,   | 225206, | 1684.3759, | 35995,   | 217162, | 1682.0227, |
| 4.215200 |         |            | 4.209319 |         |            | 4.203438 |         |            |

|          |         |            |          |         |            |          |         |            |
|----------|---------|------------|----------|---------|------------|----------|---------|------------|
| 35996,   | 215476, | 1681.9608, | 36034,   | 208862, | 1679.6076, | 36072,   | 198616, | 1677.2543, |
| 4.203284 |         |            | 4.197403 |         |            | 4.191522 |         |            |
| 35997,   | 215116, | 1681.8989, | 36035,   | 209550, | 1679.5456, | 36073,   | 199142, | 1677.1924, |
| 4.203129 |         |            | 4.197248 |         |            | 4.191367 |         |            |
| 35998,   | 215656, | 1681.8369, | 36036,   | 211134, | 1679.4837, | 36074,   | 200730, | 1677.1305, |
| 4.202974 |         |            | 4.197093 |         |            | 4.191213 |         |            |
| 35999,   | 215808, | 1681.7750, | 36037,   | 212084, | 1679.4218, | 36075,   | 201852, | 1677.0686, |
| 4.202819 |         |            | 4.196939 |         |            | 4.191058 |         |            |
| 36000,   | 214968, | 1681.7131, | 36038,   | 211564, | 1679.3599, | 36076,   | 201744, | 1677.0066, |
| 4.202665 |         |            | 4.196784 |         |            | 4.190903 |         |            |
| 36001,   | 213910, | 1681.6511, | 36039,   | 210282, | 1679.2979, | 36077,   | 201064, | 1676.9447, |
| 4.202510 |         |            | 4.196629 |         |            | 4.190748 |         |            |
| 36002,   | 213808, | 1681.5892, | 36040,   | 209474, | 1679.2360, | 36078,   | 200918, | 1676.8828, |
| 4.202355 |         |            | 4.196474 |         |            | 4.190594 |         |            |
| 36003,   | 214752, | 1681.5273, | 36041,   | 209464, | 1679.1741, | 36079,   | 201464, | 1676.8208, |
| 4.202200 |         |            | 4.196320 |         |            | 4.190439 |         |            |
| 36004,   | 215552, | 1681.4654, | 36042,   | 209414, | 1679.1121, | 36080,   | 201790, | 1676.7589, |
| 4.202046 |         |            | 4.196165 |         |            | 4.190284 |         |            |
| 36005,   | 215072, | 1681.4034, | 36043,   | 208540, | 1679.0502, | 36081,   | 201194, | 1676.6970, |
| 4.201891 |         |            | 4.196010 |         |            | 4.190129 |         |            |
| 36006,   | 213554, | 1681.3415, | 36044,   | 207254, | 1678.9883, | 36082,   | 200130, | 1676.6351, |
| 4.201736 |         |            | 4.195855 |         |            | 4.189975 |         |            |
| 36007,   | 212332, | 1681.2796, | 36045,   | 206728, | 1678.9264, | 36083,   | 199710, | 1676.5731, |
| 4.201581 |         |            | 4.195701 |         |            | 4.189820 |         |            |
| 36008,   | 212316, | 1681.2177, | 36046,   | 207456, | 1678.8644, | 36084,   | 200286, | 1676.5112, |
| 4.201427 |         |            | 4.195546 |         |            | 4.189665 |         |            |
| 36009,   | 213046, | 1681.1557, | 36047,   | 208540, | 1678.8025, | 36085,   | 200888, | 1676.4493, |
| 4.201272 |         |            | 4.195391 |         |            | 4.189510 |         |            |
| 36010,   | 213374, | 1681.0938, | 36048,   | 208638, | 1678.7406, | 36086,   | 200330, | 1676.3874, |
| 4.201117 |         |            | 4.195236 |         |            | 4.189355 |         |            |
| 36011,   | 212912, | 1681.0319, | 36049,   | 207486, | 1678.6787, | 36087,   | 198622, | 1676.3254, |
| 4.200962 |         |            | 4.195082 |         |            | 4.189201 |         |            |
| 36012,   | 212502, | 1680.9700, | 36050,   | 206196, | 1678.6167, | 36088,   | 197072, | 1676.2635, |
| 4.200808 |         |            | 4.194927 |         |            | 4.189046 |         |            |
| 36013,   | 213114, | 1680.9080, | 36051,   | 205992, | 1678.5548, | 36089,   | 196842, | 1676.2016, |
| 4.200653 |         |            | 4.194772 |         |            | 4.188891 |         |            |
| 36014,   | 214538, | 1680.8461, | 36052,   | 206824, | 1678.4929, | 36090,   | 197674, | 1676.1397, |
| 4.200498 |         |            | 4.194617 |         |            | 4.188736 |         |            |
| 36015,   | 215560, | 1680.7842, | 36053,   | 207532, | 1678.4309, | 36091,   | 198228, | 1676.0777, |
| 4.200343 |         |            | 4.194462 |         |            | 4.188582 |         |            |
| 36016,   | 215322, | 1680.7222, | 36054,   | 207274, | 1678.3690, | 36092,   | 197614, | 1676.0158, |
| 4.200189 |         |            | 4.194308 |         |            | 4.188427 |         |            |
| 36017,   | 214340, | 1680.6603, | 36055,   | 206494, | 1678.3071, | 36093,   | 196360, | 1675.9539, |
| 4.200034 |         |            | 4.194153 |         |            | 4.188272 |         |            |
| 36018,   | 213872, | 1680.5984, | 36056,   | 206268, | 1678.2452, | 36094,   | 195648, | 1675.8919, |
| 4.199879 |         |            | 4.193998 |         |            | 4.188117 |         |            |
| 36019,   | 214408, | 1680.5365, | 36057,   | 206926, | 1678.1832, | 36095,   | 195822, | 1675.8300, |
| 4.199724 |         |            | 4.193843 |         |            | 4.187963 |         |            |
| 36020,   | 215106, | 1680.4745, | 36058,   | 207572, | 1678.1213, | 36096,   | 196004, | 1675.7681, |
| 4.199570 |         |            | 4.193689 |         |            | 4.187808 |         |            |
| 36021,   | 214852, | 1680.4126, | 36059,   | 207196, | 1678.0594, | 36097,   | 195210, | 1675.7062, |
| 4.199415 |         |            | 4.193534 |         |            | 4.187653 |         |            |
| 36022,   | 213646, | 1680.3507, | 36060,   | 205928, | 1677.9975, | 36098,   | 193648, | 1675.6442, |
| 4.199260 |         |            | 4.193379 |         |            | 4.187498 |         |            |
| 36023,   | 212656, | 1680.2888, | 36061,   | 204946, | 1677.9355, | 36099,   | 192566, | 1675.5823, |
| 4.199105 |         |            | 4.193224 |         |            | 4.187344 |         |            |
| 36024,   | 212802, | 1680.2268, | 36062,   | 205038, | 1677.8736, | 36100,   | 192830, | 1675.5204, |
| 4.198950 |         |            | 4.193070 |         |            | 4.187189 |         |            |
| 36025,   | 213602, | 1680.1649, | 36063,   | 205594, | 1677.8117, | 36101,   | 193922, | 1675.4585, |
| 4.198796 |         |            | 4.192915 |         |            | 4.187034 |         |            |
| 36026,   | 213690, | 1680.1030, | 36064,   | 205300, | 1677.7498, | 36102,   | 194602, | 1675.3965, |
| 4.198641 |         |            | 4.192760 |         |            | 4.186879 |         |            |
| 36027,   | 212428, | 1680.0410, | 36065,   | 203714, | 1677.6878, | 36103,   | 194400, | 1675.3346, |
| 4.198486 |         |            | 4.192605 |         |            | 4.186725 |         |            |
| 36028,   | 210718, | 1679.9791, | 36066,   | 201884, | 1677.6259, | 36104,   | 194148, | 1675.2727, |
| 4.198331 |         |            | 4.192451 |         |            | 4.186570 |         |            |
| 36029,   | 209988, | 1679.9172, | 36067,   | 201190, | 1677.5640, | 36105,   | 194884, | 1675.2107, |
| 4.198177 |         |            | 4.192296 |         |            | 4.186415 |         |            |
| 36030,   | 210558, | 1679.8553, | 36068,   | 201738, | 1677.5020, | 36106,   | 196390, | 1675.1488, |
| 4.198022 |         |            | 4.192141 |         |            | 4.186260 |         |            |
| 36031,   | 211282, | 1679.7933, | 36069,   | 202230, | 1677.4401, | 36107,   | 197226, | 1675.0869, |
| 4.197867 |         |            | 4.191986 |         |            | 4.186106 |         |            |
| 36032,   | 210928, | 1679.7314, | 36070,   | 201454, | 1677.3782, | 36108,   | 196272, | 1675.0250, |
| 4.197712 |         |            | 4.191832 |         |            | 4.185951 |         |            |
| 36033,   | 209658, | 1679.6695, | 36071,   | 199736, | 1677.3163, | 36109,   | 194052, | 1674.9630, |
| 4.197558 |         |            | 4.191677 |         |            | 4.185796 |         |            |



|          |         |            |          |         |            |          |         |            |
|----------|---------|------------|----------|---------|------------|----------|---------|------------|
| 36110,   | 192306, | 1674.9011, | 36148,   | 190942, | 1672.5479, | 36186,   | 185266, | 1670.1947, |
| 4.185641 |         |            | 4.179761 |         |            | 4.173880 |         |            |
| 36111,   | 192258, | 1674.8392, | 36149,   | 191968, | 1672.4860, | 36187,   | 185632, | 1670.1327, |
| 4.185487 |         |            | 4.179606 |         |            | 4.173725 |         |            |
| 36112,   | 193458, | 1674.7773, | 36150,   | 193182, | 1672.4240, | 36188,   | 186024, | 1670.0708, |
| 4.185332 |         |            | 4.179451 |         |            | 4.173570 |         |            |
| 36113,   | 194460, | 1674.7153, | 36151,   | 193180, | 1672.3621, | 36189,   | 185542, | 1670.0089, |
| 4.185177 |         |            | 4.179296 |         |            | 4.173415 |         |            |
| 36114,   | 194438, | 1674.6534, | 36152,   | 191938, | 1672.3002, | 36190,   | 184310, | 1669.9470, |
| 4.185022 |         |            | 4.179141 |         |            | 4.173261 |         |            |
| 36115,   | 193890, | 1674.5915, | 36153,   | 190788, | 1672.2383, | 36191,   | 183380, | 1669.8850, |
| 4.184868 |         |            | 4.178987 |         |            | 4.173106 |         |            |
| 36116,   | 193776, | 1674.5296, | 36154,   | 190882, | 1672.1763, | 36192,   | 183510, | 1669.8231, |
| 4.184713 |         |            | 4.178832 |         |            | 4.172951 |         |            |
| 36117,   | 194284, | 1674.4676, | 36155,   | 191858, | 1672.1144, | 36193,   | 184272, | 1669.7612, |
| 4.184558 |         |            | 4.178677 |         |            | 4.172796 |         |            |
| 36118,   | 194708, | 1674.4057, | 36156,   | 192318, | 1672.0525, | 36194,   | 184602, | 1669.6993, |
| 4.184403 |         |            | 4.178522 |         |            | 4.172642 |         |            |
| 36119,   | 194474, | 1674.3438, | 36157,   | 191458, | 1671.9905, | 36195,   | 184138, | 1669.6373, |
| 4.184248 |         |            | 4.178368 |         |            | 4.172487 |         |            |
| 36120,   | 193966, | 1674.2818, | 36158,   | 189976, | 1671.9286, | 36196,   | 183704, | 1669.5754, |
| 4.184094 |         |            | 4.178213 |         |            | 4.172332 |         |            |
| 36121,   | 194030, | 1674.2199, | 36159,   | 189206, | 1671.8667, | 36197,   | 184304, | 1669.5135, |
| 4.183939 |         |            | 4.178058 |         |            | 4.172177 |         |            |
| 36122,   | 194800, | 1674.1580, | 36160,   | 189566, | 1671.8048, | 36198,   | 185818, | 1669.4515, |
| 4.183784 |         |            | 4.177903 |         |            | 4.172023 |         |            |
| 36123,   | 195394, | 1674.0961, | 36161,   | 190116, | 1671.7428, | 36199,   | 186972, | 1669.3896, |
| 4.183629 |         |            | 4.177749 |         |            | 4.171868 |         |            |
| 36124,   | 194844, | 1674.0341, | 36162,   | 189772, | 1671.6809, | 36200,   | 186676, | 1669.3277, |
| 4.183475 |         |            | 4.177594 |         |            | 4.171713 |         |            |
| 36125,   | 193282, | 1673.9722, | 36163,   | 188626, | 1671.6190, | 36201,   | 185214, | 1669.2658, |
| 4.183320 |         |            | 4.177439 |         |            | 4.171558 |         |            |
| 36126,   | 191854, | 1673.9103, | 36164,   | 187852, | 1671.5571, | 36202,   | 183924, | 1669.2038, |
| 4.183165 |         |            | 4.177284 |         |            | 4.171404 |         |            |
| 36127,   | 191470, | 1673.8484, | 36165,   | 188286, | 1671.4951, | 36203,   | 183744, | 1669.1419, |
| 4.183010 |         |            | 4.177130 |         |            | 4.171249 |         |            |
| 36128,   | 191850, | 1673.7864, | 36166,   | 189426, | 1671.4332, | 36204,   | 184296, | 1669.0800, |
| 4.182856 |         |            | 4.176975 |         |            | 4.171094 |         |            |
| 36129,   | 191978, | 1673.7245, | 36167,   | 189998, | 1671.3713, | 36205,   | 184490, | 1669.0181, |
| 4.182701 |         |            | 4.176820 |         |            | 4.170939 |         |            |
| 36130,   | 191380, | 1673.6626, | 36168,   | 189422, | 1671.3094, | 36206,   | 183864, | 1668.9561, |
| 4.182546 |         |            | 4.176665 |         |            | 4.170785 |         |            |
| 36131,   | 190712, | 1673.6006, | 36169,   | 188378, | 1671.2474, | 36207,   | 183026, | 1668.8942, |
| 4.182391 |         |            | 4.176511 |         |            | 4.170630 |         |            |
| 36132,   | 190904, | 1673.5387, | 36170,   | 187898, | 1671.1855, | 36208,   | 182782, | 1668.8323, |
| 4.182237 |         |            | 4.176356 |         |            | 4.170475 |         |            |
| 36133,   | 191974, | 1673.4768, | 36171,   | 188080, | 1671.1236, | 36209,   | 183098, | 1668.7703, |
| 4.182082 |         |            | 4.176201 |         |            | 4.170320 |         |            |
| 36134,   | 192908, | 1673.4149, | 36172,   | 188062, | 1671.0616, | 36210,   | 183160, | 1668.7084, |
| 4.181927 |         |            | 4.176046 |         |            | 4.170166 |         |            |
| 36135,   | 192810, | 1673.3529, | 36173,   | 187206, | 1670.9997, | 36211,   | 182480, | 1668.6465, |
| 4.181772 |         |            | 4.175892 |         |            | 4.170011 |         |            |
| 36136,   | 191942, | 1673.2910, | 36174,   | 186058, | 1670.9378, | 36212,   | 181558, | 1668.5846, |
| 4.181618 |         |            | 4.175737 |         |            | 4.169856 |         |            |
| 36137,   | 191354, | 1673.2291, | 36175,   | 185794, | 1670.8759, | 36213,   | 181300, | 1668.5226, |
| 4.181463 |         |            | 4.175582 |         |            | 4.169701 |         |            |
| 36138,   | 191644, | 1673.1672, | 36176,   | 186798, | 1670.8139, | 36214,   | 181846, | 1668.4607, |
| 4.181308 |         |            | 4.175427 |         |            | 4.169547 |         |            |
| 36139,   | 192310, | 1673.1052, | 36177,   | 188076, | 1670.7520, | 36215,   | 182300, | 1668.3988, |
| 4.181153 |         |            | 4.175273 |         |            | 4.169392 |         |            |
| 36140,   | 192472, | 1673.0433, | 36178,   | 188266, | 1670.6901, | 36216,   | 181762, | 1668.3369, |
| 4.180999 |         |            | 4.175118 |         |            | 4.169237 |         |            |
| 36141,   | 192054, | 1672.9814, | 36179,   | 187120, | 1670.6282, | 36217,   | 180398, | 1668.2749, |
| 4.180844 |         |            | 4.174963 |         |            | 4.169082 |         |            |
| 36142,   | 191898, | 1672.9195, | 36180,   | 185776, | 1670.5662, | 36218,   | 179270, | 1668.2130, |
| 4.180689 |         |            | 4.174808 |         |            | 4.168927 |         |            |
| 36143,   | 192638, | 1672.8575, | 36181,   | 185462, | 1670.5043, | 36219,   | 179058, | 1668.1511, |
| 4.180534 |         |            | 4.174654 |         |            | 4.168773 |         |            |
| 36144,   | 193730, | 1672.7956, | 36182,   | 186174, | 1670.4424, | 36220,   | 179248, | 1668.0892, |
| 4.180380 |         |            | 4.174499 |         |            | 4.168618 |         |            |
| 36145,   | 193946, | 1672.7337, | 36183,   | 186814, | 1670.3804, | 36221,   | 178748, | 1668.0272, |
| 4.180225 |         |            | 4.174344 |         |            | 4.168463 |         |            |
| 36146,   | 192816, | 1672.6717, | 36184,   | 186528, | 1670.3185, | 36222,   | 177326, | 1667.9653, |
| 4.180070 |         |            | 4.174189 |         |            | 4.168308 |         |            |
| 36147,   | 191326, | 1672.6098, | 36185,   | 185676, | 1670.2566, | 36223,   | 176012, | 1667.9034, |
| 4.179915 |         |            | 4.174034 |         |            | 4.168154 |         |            |

|          |         |            |          |         |            |          |         |            |
|----------|---------|------------|----------|---------|------------|----------|---------|------------|
| 36224,   | 175988, | 1667.8414, | 36262,   | 172318, | 1665.4882, | 36300,   | 165366, | 1663.1350, |
| 4.167999 |         |            | 4.162118 |         |            | 4.156237 |         |            |
| 36225,   | 177190, | 1667.7795, | 36263,   | 172740, | 1665.4263, | 36301,   | 166332, | 1663.0731, |
| 4.167844 |         |            | 4.161963 |         |            | 4.156083 |         |            |
| 36226,   | 178256, | 1667.7176, | 36264,   | 173162, | 1665.3644, | 36302,   | 167158, | 1663.0111, |
| 4.167689 |         |            | 4.161809 |         |            | 4.155928 |         |            |
| 36227,   | 177994, | 1667.6557, | 36265,   | 172756, | 1665.3024, | 36303,   | 166944, | 1662.9492, |
| 4.167535 |         |            | 4.161654 |         |            | 4.155773 |         |            |
| 36228,   | 176684, | 1667.5937, | 36266,   | 171778, | 1665.2405, | 36304,   | 166074, | 1662.8873, |
| 4.167380 |         |            | 4.161499 |         |            | 4.155618 |         |            |
| 36229,   | 175720, | 1667.5318, | 36267,   | 171194, | 1665.1786, | 36305,   | 165710, | 1662.8254, |
| 4.167225 |         |            | 4.161344 |         |            | 4.155464 |         |            |
| 36230,   | 176046, | 1667.4699, | 36268,   | 171486, | 1665.1167, | 36306,   | 166370, | 1662.7634, |
| 4.167070 |         |            | 4.161190 |         |            | 4.155309 |         |            |
| 36231,   | 177148, | 1667.4080, | 36269,   | 172002, | 1665.0547, | 36307,   | 167358, | 1662.7015, |
| 4.166916 |         |            | 4.161035 |         |            | 4.155154 |         |            |
| 36232,   | 177732, | 1667.3460, | 36270,   | 171712, | 1664.9928, | 36308,   | 167618, | 1662.6396, |
| 4.166761 |         |            | 4.160880 |         |            | 4.154999 |         |            |
| 36233,   | 177218, | 1667.2841, | 36271,   | 170426, | 1664.9309, | 36309,   | 166998, | 1662.5777, |
| 4.166606 |         |            | 4.160725 |         |            | 4.154845 |         |            |
| 36234,   | 176322, | 1667.2222, | 36272,   | 169016, | 1664.8690, | 36310,   | 166388, | 1662.5157, |
| 4.166451 |         |            | 4.160571 |         |            | 4.154690 |         |            |
| 36235,   | 176072, | 1667.1603, | 36273,   | 168402, | 1664.8070, | 36311,   | 166590, | 1662.4538, |
| 4.166297 |         |            | 4.160416 |         |            | 4.154535 |         |            |
| 36236,   | 176528, | 1667.0983, | 36274,   | 168518, | 1664.7451, | 36312,   | 167322, | 1662.3919, |
| 4.166142 |         |            | 4.160261 |         |            | 4.154380 |         |            |
| 36237,   | 176770, | 1667.0364, | 36275,   | 168514, | 1664.6832, | 36313,   | 167566, | 1662.3300, |
| 4.165987 |         |            | 4.160106 |         |            | 4.154226 |         |            |
| 36238,   | 176116, | 1666.9745, | 36276,   | 167882, | 1664.6212, | 36314,   | 166806, | 1662.2680, |
| 4.165832 |         |            | 4.159952 |         |            | 4.154071 |         |            |
| 36239,   | 175054, | 1666.9125, | 36277,   | 167148, | 1664.5593, | 36315,   | 165674, | 1662.2061, |
| 4.165678 |         |            | 4.159797 |         |            | 4.153916 |         |            |
| 36240,   | 174734, | 1666.8506, | 36278,   | 167214, | 1664.4974, | 36316,   | 165216, | 1662.1442, |
| 4.165523 |         |            | 4.159642 |         |            | 4.153761 |         |            |
| 36241,   | 175596, | 1666.7887, | 36279,   | 168208, | 1664.4355, | 36317,   | 165640, | 1662.0822, |
| 4.165368 |         |            | 4.159487 |         |            | 4.153606 |         |            |
| 36242,   | 176776, | 1666.7268, | 36280,   | 169216, | 1664.3735, | 36318,   | 166112, | 1662.0203, |
| 4.165213 |         |            | 4.159333 |         |            | 4.153452 |         |            |
| 36243,   | 177068, | 1666.6648, | 36281,   | 169320, | 1664.3116, | 36319,   | 165754, | 1661.9584, |
| 4.165059 |         |            | 4.159178 |         |            | 4.153297 |         |            |
| 36244,   | 176248, | 1666.6029, | 36282,   | 168622, | 1664.2497, | 36320,   | 164722, | 1661.8965, |
| 4.164904 |         |            | 4.159023 |         |            | 4.153142 |         |            |
| 36245,   | 175310, | 1666.5410, | 36283,   | 168090, | 1664.1878, | 36321,   | 163950, | 1661.8345, |
| 4.164749 |         |            | 4.158868 |         |            | 4.152987 |         |            |
| 36246,   | 175282, | 1666.4791, | 36284,   | 168374, | 1664.1258, | 36322,   | 163988, | 1661.7726, |
| 4.164594 |         |            | 4.158713 |         |            | 4.152833 |         |            |
| 36247,   | 176090, | 1666.4171, | 36285,   | 169018, | 1664.0639, | 36323,   | 164298, | 1661.7107, |
| 4.164440 |         |            | 4.158559 |         |            | 4.152678 |         |            |
| 36248,   | 176752, | 1666.3552, | 36286,   | 169072, | 1664.0020, | 36324,   | 163894, | 1661.6488, |
| 4.164285 |         |            | 4.158404 |         |            | 4.152523 |         |            |
| 36249,   | 176612, | 1666.2933, | 36287,   | 168302, | 1663.9401, | 36325,   | 162622, | 1661.5868, |
| 4.164130 |         |            | 4.158249 |         |            | 4.152368 |         |            |
| 36250,   | 176084, | 1666.2313, | 36288,   | 167556, | 1663.8781, | 36326,   | 161426, | 1661.5249, |
| 4.163975 |         |            | 4.158094 |         |            | 4.152214 |         |            |
| 36251,   | 176004, | 1666.1694, | 36289,   | 167754, | 1663.8162, | 36327,   | 161354, | 1661.4630, |
| 4.163820 |         |            | 4.157940 |         |            | 4.152059 |         |            |
| 36252,   | 176456, | 1666.1075, | 36290,   | 168712, | 1663.7543, | 36328,   | 162324, | 1661.4010, |
| 4.163666 |         |            | 4.157785 |         |            | 4.151904 |         |            |
| 36253,   | 176572, | 1666.0456, | 36291,   | 169256, | 1663.6923, | 36329,   | 163232, | 1661.3391, |
| 4.163511 |         |            | 4.157630 |         |            | 4.151749 |         |            |
| 36254,   | 175580, | 1665.9836, | 36292,   | 168574, | 1663.6304, | 36330,   | 163152, | 1661.2772, |
| 4.163356 |         |            | 4.157475 |         |            | 4.151595 |         |            |
| 36255,   | 173894, | 1665.9217, | 36293,   | 167178, | 1663.5685, | 36331,   | 162362, | 1661.2153, |
| 4.163201 |         |            | 4.157321 |         |            | 4.151440 |         |            |
| 36256,   | 172790, | 1665.8598, | 36294,   | 166394, | 1663.5066, | 36332,   | 161880, | 1661.1533, |
| 4.163047 |         |            | 4.157166 |         |            | 4.151285 |         |            |
| 36257,   | 173056, | 1665.7979, | 36295,   | 166826, | 1663.4446, | 36333,   | 162236, | 1661.0914, |
| 4.162892 |         |            | 4.157011 |         |            | 4.151130 |         |            |
| 36258,   | 174090, | 1665.7359, | 36296,   | 167678, | 1663.3827, | 36334,   | 162866, | 1661.0295, |
| 4.162737 |         |            | 4.156856 |         |            | 4.150976 |         |            |
| 36259,   | 174562, | 1665.6740, | 36297,   | 167688, | 1663.3208, | 36335,   | 162872, | 1660.9676, |
| 4.162582 |         |            | 4.156702 |         |            | 4.150821 |         |            |
| 36260,   | 173880, | 1665.6121, | 36298,   | 166586, | 1663.2589, | 36336,   | 162128, | 1660.9056, |
| 4.162428 |         |            | 4.156547 |         |            | 4.150666 |         |            |
| 36261,   | 172760, | 1665.5502, | 36299,   | 165430, | 1663.1969, | 36337,   | 161390, | 1660.8437, |
| 4.162273 |         |            | 4.156392 |         |            | 4.150511 |         |            |

|          |         |            |          |         |            |          |         |            |
|----------|---------|------------|----------|---------|------------|----------|---------|------------|
| 36338,   | 161290, | 1660.7818, | 36376,   | 156042, | 1658.4286, | 36414,   | 153336, | 1656.0753, |
| 4.150357 |         |            | 4.144476 |         |            | 4.138595 |         |            |
| 36339,   | 161464, | 1660.7199, | 36377,   | 157114, | 1658.3666, | 36415,   | 153900, | 1656.0134, |
| 4.150202 |         |            | 4.144321 |         |            | 4.138440 |         |            |
| 36340,   | 161002, | 1660.6579, | 36378,   | 157552, | 1658.3047, | 36416,   | 153744, | 1655.9515, |
| 4.150047 |         |            | 4.144166 |         |            | 4.138285 |         |            |
| 36341,   | 159654, | 1660.5960, | 36379,   | 156984, | 1658.2428, | 36417,   | 152552, | 1655.8896, |
| 4.149892 |         |            | 4.144011 |         |            | 4.138131 |         |            |
| 36342,   | 158360, | 1660.5341, | 36380,   | 156136, | 1658.1808, | 36418,   | 151266, | 1655.8276, |
| 4.149738 |         |            | 4.143857 |         |            | 4.137976 |         |            |
| 36343,   | 158348, | 1660.4721, | 36381,   | 155908, | 1658.1189, | 36419,   | 151070, | 1655.7657, |
| 4.149583 |         |            | 4.143702 |         |            | 4.137821 |         |            |
| 36344,   | 159772, | 1660.4102, | 36382,   | 156272, | 1658.0570, | 36420,   | 152068, | 1655.7038, |
| 4.149428 |         |            | 4.143547 |         |            | 4.137666 |         |            |
| 36345,   | 161452, | 1660.3483, | 36383,   | 156328, | 1657.9951, | 36421,   | 153216, | 1655.6418, |
| 4.149273 |         |            | 4.143392 |         |            | 4.137512 |         |            |
| 36346,   | 162066, | 1660.2864, | 36384,   | 155480, | 1657.9331, | 36422,   | 153526, | 1655.5799, |
| 4.149118 |         |            | 4.143238 |         |            | 4.137357 |         |            |
| 36347,   | 161444, | 1660.2244, | 36385,   | 154298, | 1657.8712, | 36423,   | 153078, | 1655.5180, |
| 4.148964 |         |            | 4.143083 |         |            | 4.137202 |         |            |
| 36348,   | 160562, | 1660.1625, | 36386,   | 153968, | 1657.8093, | 36424,   | 152710, | 1655.4561, |
| 4.148809 |         |            | 4.142928 |         |            | 4.137047 |         |            |
| 36349,   | 160326, | 1660.1006, | 36387,   | 154904, | 1657.7474, | 36425,   | 152816, | 1655.3941, |
| 4.148654 |         |            | 4.142773 |         |            | 4.136893 |         |            |
| 36350,   | 160630, | 1660.0387, | 36388,   | 156174, | 1657.6854, | 36426,   | 152826, | 1655.3322, |
| 4.148499 |         |            | 4.142619 |         |            | 4.136738 |         |            |
| 36351,   | 160670, | 1659.9767, | 36389,   | 156480, | 1657.6235, | 36427,   | 151962, | 1655.2703, |
| 4.148345 |         |            | 4.142464 |         |            | 4.136583 |         |            |
| 36352,   | 160072, | 1659.9148, | 36390,   | 155618, | 1657.5616, | 36428,   | 150346, | 1655.2084, |
| 4.148190 |         |            | 4.142309 |         |            | 4.136428 |         |            |
| 36353,   | 159352, | 1659.8529, | 36391,   | 154674, | 1657.4997, | 36429,   | 149054, | 1655.1464, |
| 4.148035 |         |            | 4.142154 |         |            | 4.136274 |         |            |
| 36354,   | 159198, | 1659.7909, | 36392,   | 154798, | 1657.4377, | 36430,   | 148940, | 1655.0845, |
| 4.147880 |         |            | 4.142000 |         |            | 4.136119 |         |            |
| 36355,   | 159534, | 1659.7290, | 36393,   | 155896, | 1657.3758, | 36431,   | 149670, | 1655.0226, |
| 4.147726 |         |            | 4.141845 |         |            | 4.135964 |         |            |
| 36356,   | 159604, | 1659.6671, | 36394,   | 156786, | 1657.3139, | 36432,   | 150064, | 1654.9607, |
| 4.147571 |         |            | 4.141690 |         |            | 4.135809 |         |            |
| 36357,   | 158954, | 1659.6052, | 36395,   | 156612, | 1657.2519, | 36433,   | 149460, | 1654.8987, |
| 4.147416 |         |            | 4.141535 |         |            | 4.135655 |         |            |
| 36358,   | 158120, | 1659.5432, | 36396,   | 155792, | 1657.1900, | 36434,   | 148410, | 1654.8368, |
| 4.147261 |         |            | 4.141381 |         |            | 4.135500 |         |            |
| 36359,   | 158052, | 1659.4813, | 36397,   | 155480, | 1657.1281, | 36435,   | 148038, | 1654.7749, |
| 4.147107 |         |            | 4.141226 |         |            | 4.135345 |         |            |
| 36360,   | 158936, | 1659.4194, | 36398,   | 156142, | 1657.0662, | 36436,   | 148670, | 1654.7129, |
| 4.146952 |         |            | 4.141071 |         |            | 4.135190 |         |            |
| 36361,   | 159846, | 1659.3575, | 36399,   | 157020, | 1657.0042, | 36437,   | 149490, | 1654.6510, |
| 4.146797 |         |            | 4.140916 |         |            | 4.135036 |         |            |
| 36362,   | 159746, | 1659.2955, | 36400,   | 157036, | 1656.9423, | 36438,   | 149462, | 1654.5891, |
| 4.146642 |         |            | 4.140762 |         |            | 4.134881 |         |            |
| 36363,   | 158684, | 1659.2336, | 36401,   | 156072, | 1656.8804, | 36439,   | 148500, | 1654.5272, |
| 4.146488 |         |            | 4.140607 |         |            | 4.134726 |         |            |
| 36364,   | 157798, | 1659.1717, | 36402,   | 155080, | 1656.8185, | 36440,   | 147444, | 1654.4652, |
| 4.146333 |         |            | 4.140452 |         |            | 4.134571 |         |            |
| 36365,   | 158024, | 1659.1098, | 36403,   | 154938, | 1656.7565, | 36441,   | 146978, | 1654.4033, |
| 4.146178 |         |            | 4.140297 |         |            | 4.134417 |         |            |
| 36366,   | 158994, | 1659.0478, | 36404,   | 155454, | 1656.6946, | 36442,   | 146850, | 1654.3414, |
| 4.146023 |         |            | 4.140143 |         |            | 4.134262 |         |            |
| 36367,   | 159448, | 1658.9859, | 36405,   | 155670, | 1656.6327, | 36443,   | 146334, | 1654.2795, |
| 4.145869 |         |            | 4.139988 |         |            | 4.134107 |         |            |
| 36368,   | 158624, | 1658.9240, | 36406,   | 155126, | 1656.5707, | 36444,   | 145340, | 1654.2175, |
| 4.145714 |         |            | 4.139833 |         |            | 4.133952 |         |            |
| 36369,   | 157102, | 1658.8620, | 36407,   | 154430, | 1656.5088, | 36445,   | 144728, | 1654.1556, |
| 4.145559 |         |            | 4.139678 |         |            | 4.133797 |         |            |
| 36370,   | 156094, | 1658.8001, | 36408,   | 154494, | 1656.4469, | 36446,   | 145354, | 1654.0937, |
| 4.145404 |         |            | 4.139524 |         |            | 4.133643 |         |            |
| 36371,   | 156106, | 1658.7382, | 36409,   | 155324, | 1656.3850, | 36447,   | 146964, | 1654.0317, |
| 4.145250 |         |            | 4.139369 |         |            | 4.133488 |         |            |
| 36372,   | 156470, | 1658.6763, | 36410,   | 155928, | 1656.3230, | 36448,   | 148298, | 1653.9698, |
| 4.145095 |         |            | 4.139214 |         |            | 4.133333 |         |            |
| 36373,   | 156322, | 1658.6143, | 36411,   | 155428, | 1656.2611, | 36449,   | 148338, | 1653.9079, |
| 4.144940 |         |            | 4.139059 |         |            | 4.133178 |         |            |
| 36374,   | 155672, | 1658.5524, | 36412,   | 154140, | 1656.1992, | 36450,   | 147354, | 1653.8460, |
| 4.144785 |         |            | 4.138904 |         |            | 4.133024 |         |            |
| 36375,   | 155392, | 1658.4905, | 36413,   | 153216, | 1656.1373, | 36451,   | 146500, | 1653.7840, |
| 4.144631 |         |            | 4.138750 |         |            | 4.132869 |         |            |

|          |         |            |          |         |            |          |         |            |
|----------|---------|------------|----------|---------|------------|----------|---------|------------|
| 36452,   | 146518, | 1653.7221, | 36490,   | 141206, | 1651.3689, | 36528,   | 135260, | 1649.0157, |
| 4.132714 |         |            | 4.126833 |         |            | 4.120953 |         |            |
| 36453,   | 146998, | 1653.6602, | 36491,   | 141758, | 1651.3070, | 36529,   | 136102, | 1648.9537, |
| 4.132559 |         |            | 4.126679 |         |            | 4.120798 |         |            |
| 36454,   | 147024, | 1653.5983, | 36492,   | 141646, | 1651.2450, | 36530,   | 135908, | 1648.8918, |
| 4.132405 |         |            | 4.126524 |         |            | 4.120643 |         |            |
| 36455,   | 146372, | 1653.5363, | 36493,   | 140636, | 1651.1831, | 36531,   | 134820, | 1648.8299, |
| 4.132250 |         |            | 4.126369 |         |            | 4.120488 |         |            |
| 36456,   | 145790, | 1653.4744, | 36494,   | 139512, | 1651.1212, | 36532,   | 133956, | 1648.7680, |
| 4.132095 |         |            | 4.126214 |         |            | 4.120334 |         |            |
| 36457,   | 146066, | 1653.4125, | 36495,   | 139026, | 1651.0593, | 36533,   | 134126, | 1648.7060, |
| 4.131940 |         |            | 4.126060 |         |            | 4.120179 |         |            |
| 36458,   | 147050, | 1653.3506, | 36496,   | 139000, | 1650.9973, | 36534,   | 134910, | 1648.6441, |
| 4.131786 |         |            | 4.125905 |         |            | 4.120024 |         |            |
| 36459,   | 147836, | 1653.2886, | 36497,   | 138668, | 1650.9354, | 36535,   | 135240, | 1648.5822, |
| 4.131631 |         |            | 4.125750 |         |            | 4.119869 |         |            |
| 36460,   | 147814, | 1653.2267, | 36498,   | 137754, | 1650.8735, | 36536,   | 134722, | 1648.5203, |
| 4.131476 |         |            | 4.125595 |         |            | 4.119715 |         |            |
| 36461,   | 147354, | 1653.1648, | 36499,   | 136942, | 1650.8115, | 36537,   | 134080, | 1648.4583, |
| 4.131321 |         |            | 4.125441 |         |            | 4.119560 |         |            |
| 36462,   | 147228, | 1653.1028, | 36500,   | 137108, | 1650.7496, | 36538,   | 134236, | 1648.3964, |
| 4.131167 |         |            | 4.125286 |         |            | 4.119405 |         |            |
| 36463,   | 147544, | 1653.0409, | 36501,   | 138230, | 1650.6877, | 36539,   | 135128, | 1648.3345, |
| 4.131012 |         |            | 4.125131 |         |            | 4.119250 |         |            |
| 36464,   | 147566, | 1652.9790, | 36502,   | 139328, | 1650.6258, | 36540,   | 135712, | 1648.2725, |
| 4.130857 |         |            | 4.124976 |         |            | 4.119096 |         |            |
| 36465,   | 146646, | 1652.9171, | 36503,   | 139576, | 1650.5638, | 36541,   | 135208, | 1648.2106, |
| 4.130702 |         |            | 4.124822 |         |            | 4.118941 |         |            |
| 36466,   | 145160, | 1652.8551, | 36504,   | 139250, | 1650.5019, | 36542,   | 134008, | 1648.1487, |
| 4.130548 |         |            | 4.124667 |         |            | 4.118786 |         |            |
| 36467,   | 144236, | 1652.7932, | 36505,   | 139382, | 1650.4400, | 36543,   | 133268, | 1648.0868, |
| 4.130393 |         |            | 4.124512 |         |            | 4.118631 |         |            |
| 36468,   | 144524, | 1652.7313, | 36506,   | 140482, | 1650.3781, | 36544,   | 133578, | 1648.0248, |
| 4.130238 |         |            | 4.124357 |         |            | 4.118476 |         |            |
| 36469,   | 145446, | 1652.6694, | 36507,   | 141858, | 1650.3161, | 36545,   | 134342, | 1647.9629, |
| 4.130083 |         |            | 4.124203 |         |            | 4.118322 |         |            |
| 36470,   | 145816, | 1652.6074, | 36508,   | 142338, | 1650.2542, | 36546,   | 134570, | 1647.9010, |
| 4.129929 |         |            | 4.124048 |         |            | 4.118167 |         |            |
| 36471,   | 145230, | 1652.5455, | 36509,   | 141578, | 1650.1923, | 36547,   | 134112, | 1647.8391, |
| 4.129774 |         |            | 4.123893 |         |            | 4.118012 |         |            |
| 36472,   | 144490, | 1652.4836, | 36510,   | 140394, | 1650.1304, | 36548,   | 133790, | 1647.7771, |
| 4.129619 |         |            | 4.123738 |         |            | 4.117857 |         |            |
| 36473,   | 144670, | 1652.4216, | 36511,   | 139798, | 1650.0684, | 36549,   | 134306, | 1647.7152, |
| 4.129464 |         |            | 4.123583 |         |            | 4.117703 |         |            |
| 36474,   | 145810, | 1652.3597, | 36512,   | 139872, | 1650.0065, | 36550,   | 135274, | 1647.6533, |
| 4.129310 |         |            | 4.123429 |         |            | 4.117548 |         |            |
| 36475,   | 146834, | 1652.2978, | 36513,   | 139810, | 1649.9446, | 36551,   | 135580, | 1647.5913, |
| 4.129155 |         |            | 4.123274 |         |            | 4.117393 |         |            |
| 36476,   | 146732, | 1652.2359, | 36514,   | 139046, | 1649.8826, | 36552,   | 134694, | 1647.5294, |
| 4.129000 |         |            | 4.123119 |         |            | 4.117238 |         |            |
| 36477,   | 145640, | 1652.1739, | 36515,   | 138004, | 1649.8207, | 36553,   | 133372, | 1647.4675, |
| 4.128845 |         |            | 4.122964 |         |            | 4.117084 |         |            |
| 36478,   | 144570, | 1652.1120, | 36516,   | 137570, | 1649.7588, | 36554,   | 132844, | 1647.4056, |
| 4.128690 |         |            | 4.122810 |         |            | 4.116929 |         |            |
| 36479,   | 144186, | 1652.0501, | 36517,   | 137938, | 1649.6969, | 36555,   | 133432, | 1647.3436, |
| 4.128536 |         |            | 4.122655 |         |            | 4.116774 |         |            |
| 36480,   | 144122, | 1651.9882, | 36518,   | 138268, | 1649.6349, | 36556,   | 134214, | 1647.2817, |
| 4.128381 |         |            | 4.122500 |         |            | 4.116619 |         |            |
| 36481,   | 143612, | 1651.9262, | 36519,   | 137664, | 1649.5730, | 36557,   | 134130, | 1647.2198, |
| 4.128226 |         |            | 4.122345 |         |            | 4.116465 |         |            |
| 36482,   | 142624, | 1651.8643, | 36520,   | 136276, | 1649.5111, | 36558,   | 133226, | 1647.1579, |
| 4.128071 |         |            | 4.122191 |         |            | 4.116310 |         |            |
| 36483,   | 142022, | 1651.8024, | 36521,   | 135222, | 1649.4492, | 36559,   | 132534, | 1647.0959, |
| 4.127917 |         |            | 4.122036 |         |            | 4.116155 |         |            |
| 36484,   | 142522, | 1651.7405, | 36522,   | 135310, | 1649.3872, | 36560,   | 132776, | 1647.0340, |
| 4.127762 |         |            | 4.121881 |         |            | 4.116000 |         |            |
| 36485,   | 143692, | 1651.6785, | 36523,   | 136102, | 1649.3253, | 36561,   | 133468, | 1646.9721, |
| 4.127607 |         |            | 4.121726 |         |            | 4.115846 |         |            |
| 36486,   | 144282, | 1651.6166, | 36524,   | 136400, | 1649.2634, | 36562,   | 133484, | 1646.9102, |
| 4.127452 |         |            | 4.121572 |         |            | 4.115691 |         |            |
| 36487,   | 143530, | 1651.5547, | 36525,   | 135662, | 1649.2014, | 36563,   | 132450, | 1646.8482, |
| 4.127298 |         |            | 4.121417 |         |            | 4.115536 |         |            |
| 36488,   | 142032, | 1651.4927, | 36526,   | 134626, | 1649.1395, | 36564,   | 131230, | 1646.7863, |
| 4.127143 |         |            | 4.121262 |         |            | 4.115381 |         |            |
| 36489,   | 141066, | 1651.4308, | 36527,   | 134430, | 1649.0776, | 36565,   | 130964, | 1646.7244, |
| 4.126988 |         |            | 4.121107 |         |            | 4.115227 |         |            |

|          |         |            |          |         |            |          |         |            |
|----------|---------|------------|----------|---------|------------|----------|---------|------------|
| 36566,   | 131694, | 1646.6624, | 36604,   | 129710, | 1644.3092, | 36642,   | 126370, | 1641.9560, |
| 4.115072 |         |            | 4.109191 |         |            | 4.103310 |         |            |
| 36567,   | 132324, | 1646.6005, | 36605,   | 130328, | 1644.2473, | 36643,   | 126504, | 1641.8941, |
| 4.114917 |         |            | 4.109036 |         |            | 4.103155 |         |            |
| 36568,   | 131904, | 1646.5386, | 36606,   | 130126, | 1644.1854, | 36644,   | 125548, | 1641.8321, |
| 4.114762 |         |            | 4.108882 |         |            | 4.103001 |         |            |
| 36569,   | 130782, | 1646.4767, | 36607,   | 129184, | 1644.1234, | 36645,   | 124164, | 1641.7702, |
| 4.114608 |         |            | 4.108727 |         |            | 4.102846 |         |            |
| 36570,   | 130204, | 1646.4147, | 36608,   | 128452, | 1644.0615, | 36646,   | 123548, | 1641.7083, |
| 4.114453 |         |            | 4.108572 |         |            | 4.102691 |         |            |
| 36571,   | 130870, | 1646.3528, | 36609,   | 128528, | 1643.9996, | 36647,   | 124088, | 1641.6464, |
| 4.114298 |         |            | 4.108417 |         |            | 4.102536 |         |            |
| 36572,   | 132070, | 1646.2909, | 36610,   | 128932, | 1643.9377, | 36648,   | 124920, | 1641.5844, |
| 4.114143 |         |            | 4.108262 |         |            | 4.102382 |         |            |
| 36573,   | 132538, | 1646.2290, | 36611,   | 128764, | 1643.8757, | 36649,   | 124912, | 1641.5225, |
| 4.113989 |         |            | 4.108108 |         |            | 4.102227 |         |            |
| 36574,   | 131890, | 1646.1670, | 36612,   | 127838, | 1643.8138, | 36650,   | 123906, | 1641.4606, |
| 4.113834 |         |            | 4.107953 |         |            | 4.102072 |         |            |
| 36575,   | 131070, | 1646.1051, | 36613,   | 126928, | 1643.7519, | 36651,   | 122820, | 1641.3987, |
| 4.113679 |         |            | 4.107798 |         |            | 4.101917 |         |            |
| 36576,   | 131238, | 1646.0432, | 36614,   | 126780, | 1643.6900, | 36652,   | 122492, | 1641.3367, |
| 4.113524 |         |            | 4.107643 |         |            | 4.101763 |         |            |
| 36577,   | 132388, | 1645.9812, | 36615,   | 127148, | 1643.6280, | 36653,   | 122692, | 1641.2748, |
| 4.113369 |         |            | 4.107489 |         |            | 4.101608 |         |            |
| 36578,   | 133372, | 1645.9193, | 36616,   | 127040, | 1643.5661, | 36654,   | 122488, | 1641.2129, |
| 4.113215 |         |            | 4.107334 |         |            | 4.101453 |         |            |
| 36579,   | 133200, | 1645.8574, | 36617,   | 125908, | 1643.5042, | 36655,   | 121494, | 1641.1510, |
| 4.113060 |         |            | 4.107179 |         |            | 4.101298 |         |            |
| 36580,   | 132130, | 1645.7955, | 36618,   | 124396, | 1643.4422, | 36656,   | 120462, | 1641.0890, |
| 4.112905 |         |            | 4.107024 |         |            | 4.101144 |         |            |
| 36581,   | 131262, | 1645.7335, | 36619,   | 123636, | 1643.3803, | 36657,   | 120468, | 1641.0271, |
| 4.112750 |         |            | 4.106870 |         |            | 4.100989 |         |            |
| 36582,   | 131226, | 1645.6716, | 36620,   | 123970, | 1643.3184, | 36658,   | 121626, | 1640.9652, |
| 4.112596 |         |            | 4.106715 |         |            | 4.100834 |         |            |
| 36583,   | 131522, | 1645.6097, | 36621,   | 124606, | 1643.2565, | 36659,   | 122902, | 1640.9032, |
| 4.112441 |         |            | 4.106560 |         |            | 4.100679 |         |            |
| 36584,   | 131258, | 1645.5478, | 36622,   | 124578, | 1643.1945, | 36660,   | 123192, | 1640.8413, |
| 4.112286 |         |            | 4.106405 |         |            | 4.100525 |         |            |
| 36585,   | 130304, | 1645.4858, | 36623,   | 123916, | 1643.1326, | 36661,   | 122496, | 1640.7794, |
| 4.112131 |         |            | 4.106251 |         |            | 4.100370 |         |            |
| 36586,   | 129442, | 1645.4239, | 36624,   | 123608, | 1643.0707, | 36662,   | 121818, | 1640.7175, |
| 4.111977 |         |            | 4.106096 |         |            | 4.100215 |         |            |
| 36587,   | 129352, | 1645.3620, | 36625,   | 124390, | 1643.0088, | 36663,   | 121916, | 1640.6555, |
| 4.111822 |         |            | 4.105941 |         |            | 4.100060 |         |            |
| 36588,   | 129746, | 1645.3001, | 36626,   | 125836, | 1642.9468, | 36664,   | 122490, | 1640.5936, |
| 4.111667 |         |            | 4.105786 |         |            | 4.099906 |         |            |
| 36589,   | 129744, | 1645.2381, | 36627,   | 126826, | 1642.8849, | 36665,   | 122638, | 1640.5317, |
| 4.111512 |         |            | 4.105632 |         |            | 4.099751 |         |            |
| 36590,   | 129050, | 1645.1762, | 36628,   | 126774, | 1642.8230, | 36666,   | 122054, | 1640.4698, |
| 4.111358 |         |            | 4.105477 |         |            | 4.099596 |         |            |
| 36591,   | 128442, | 1645.1143, | 36629,   | 126246, | 1642.7610, | 36667,   | 121424, | 1640.4078, |
| 4.111203 |         |            | 4.105322 |         |            | 4.099441 |         |            |
| 36592,   | 128874, | 1645.0523, | 36630,   | 126156, | 1642.6991, | 36668,   | 121592, | 1640.3459, |
| 4.111048 |         |            | 4.105167 |         |            | 4.099287 |         |            |
| 36593,   | 130246, | 1644.9904, | 36631,   | 126614, | 1642.6372, | 36669,   | 122484, | 1640.2840, |
| 4.110893 |         |            | 4.105013 |         |            | 4.099132 |         |            |
| 36594,   | 131350, | 1644.9285, | 36632,   | 126820, | 1642.5753, | 36670,   | 123132, | 1640.2220, |
| 4.110739 |         |            | 4.104858 |         |            | 4.098977 |         |            |
| 36595,   | 131156, | 1644.8666, | 36633,   | 126108, | 1642.5133, | 36671,   | 122766, | 1640.1601, |
| 4.110584 |         |            | 4.104703 |         |            | 4.098822 |         |            |
| 36596,   | 130020, | 1644.8046, | 36634,   | 124870, | 1642.4514, | 36672,   | 121680, | 1640.0982, |
| 4.110429 |         |            | 4.104548 |         |            | 4.098667 |         |            |
| 36597,   | 129320, | 1644.7427, | 36635,   | 124220, | 1642.3895, | 36673,   | 120856, | 1640.0363, |
| 4.110274 |         |            | 4.104394 |         |            | 4.098513 |         |            |
| 36598,   | 129930, | 1644.6808, | 36636,   | 124724, | 1642.3276, | 36674,   | 120796, | 1639.9743, |
| 4.110120 |         |            | 4.104239 |         |            | 4.098358 |         |            |
| 36599,   | 131238, | 1644.6189, | 36637,   | 125772, | 1642.2656, | 36675,   | 121002, | 1639.9124, |
| 4.109965 |         |            | 4.104084 |         |            | 4.098203 |         |            |
| 36600,   | 131830, | 1644.5569, | 36638,   | 126278, | 1642.2037, | 36676,   | 120676, | 1639.8505, |
| 4.109810 |         |            | 4.103929 |         |            | 4.098048 |         |            |
| 36601,   | 131074, | 1644.4950, | 36639,   | 125940, | 1642.1418, | 36677,   | 119778, | 1639.7886, |
| 4.109655 |         |            | 4.103774 |         |            | 4.097894 |         |            |
| 36602,   | 129784, | 1644.4331, | 36640,   | 125490, | 1642.0799, | 36678,   | 119104, | 1639.7266, |
| 4.109501 |         |            | 4.103620 |         |            | 4.097739 |         |            |
| 36603,   | 129224, | 1644.3711, | 36641,   | 125704, | 1642.0179, | 36679,   | 119330, | 1639.6647, |
| 4.109346 |         |            | 4.103465 |         |            | 4.097584 |         |            |

|          |         |            |          |         |            |          |         |            |
|----------|---------|------------|----------|---------|------------|----------|---------|------------|
| 36680,   | 120154, | 1639.6028, | 36718,   | 120600, | 1637.2496, | 36756,   | 115696, | 1634.8963, |
| 4.097429 |         |            | 4.091549 |         |            | 4.085668 |         |            |
| 36681,   | 120612, | 1639.5409, | 36719,   | 121206, | 1637.1876, | 36757,   | 116362, | 1634.8344, |
| 4.097275 |         |            | 4.091394 |         |            | 4.085513 |         |            |
| 36682,   | 120192, | 1639.4789, | 36720,   | 120832, | 1637.1257, | 36758,   | 116190, | 1634.7725, |
| 4.097120 |         |            | 4.091239 |         |            | 4.085358 |         |            |
| 36683,   | 119360, | 1639.4170, | 36721,   | 120138, | 1637.0638, | 36759,   | 115894, | 1634.7106, |
| 4.096965 |         |            | 4.091084 |         |            | 4.085204 |         |            |
| 36684,   | 118936, | 1639.3551, | 36722,   | 120062, | 1637.0018, | 36760,   | 116322, | 1634.6486, |
| 4.096810 |         |            | 4.090930 |         |            | 4.085049 |         |            |
| 36685,   | 119060, | 1639.2931, | 36723,   | 120650, | 1636.9399, | 36761,   | 117318, | 1634.5867, |
| 4.096656 |         |            | 4.090775 |         |            | 4.084894 |         |            |
| 36686,   | 119092, | 1639.2312, | 36724,   | 120948, | 1636.8780, | 36762,   | 117818, | 1634.5248, |
| 4.096501 |         |            | 4.090620 |         |            | 4.084739 |         |            |
| 36687,   | 118536, | 1639.1693, | 36725,   | 120196, | 1636.8161, | 36763,   | 117140, | 1634.4628, |
| 4.096346 |         |            | 4.090465 |         |            | 4.084585 |         |            |
| 36688,   | 117838, | 1639.1074, | 36726,   | 118828, | 1636.7541, | 36764,   | 115852, | 1634.4009, |
| 4.096191 |         |            | 4.090311 |         |            | 4.084430 |         |            |
| 36689,   | 117994, | 1639.0454, | 36727,   | 118032, | 1636.6922, | 36765,   | 115162, | 1634.3390, |
| 4.096037 |         |            | 4.090156 |         |            | 4.084275 |         |            |
| 36690,   | 119338, | 1638.9835, | 36728,   | 118394, | 1636.6303, | 36766,   | 115506, | 1634.2771, |
| 4.095882 |         |            | 4.090001 |         |            | 4.084120 |         |            |
| 36691,   | 121024, | 1638.9216, | 36729,   | 119196, | 1636.5684, | 36767,   | 115976, | 1634.2151, |
| 4.095727 |         |            | 4.089846 |         |            | 4.083966 |         |            |
| 36692,   | 121828, | 1638.8597, | 36730,   | 119244, | 1636.5064, | 36768,   | 115316, | 1634.1532, |
| 4.095572 |         |            | 4.089692 |         |            | 4.083811 |         |            |
| 36693,   | 121476, | 1638.7977, | 36731,   | 118276, | 1636.4445, | 36769,   | 113356, | 1634.0913, |
| 4.095418 |         |            | 4.089537 |         |            | 4.083656 |         |            |
| 36694,   | 120900, | 1638.7358, | 36732,   | 117254, | 1636.3826, | 36770,   | 111218, | 1634.0294, |
| 4.095263 |         |            | 4.089382 |         |            | 4.083501 |         |            |
| 36695,   | 121110, | 1638.6739, | 36733,   | 117218, | 1636.3207, | 36771,   | 110078, | 1633.9674, |
| 4.095108 |         |            | 4.089227 |         |            | 4.083346 |         |            |
| 36696,   | 122016, | 1638.6119, | 36734,   | 118030, | 1636.2587, | 36772,   | 109948, | 1633.9055, |
| 4.094953 |         |            | 4.089073 |         |            | 4.083192 |         |            |
| 36697,   | 122532, | 1638.5500, | 36735,   | 118504, | 1636.1968, | 36773,   | 109882, | 1633.8436, |
| 4.094799 |         |            | 4.088918 |         |            | 4.083037 |         |            |
| 36698,   | 121914, | 1638.4881, | 36736,   | 117782, | 1636.1349, | 36774,   | 109274, | 1633.7816, |
| 4.094644 |         |            | 4.088763 |         |            | 4.082882 |         |            |
| 36699,   | 120630, | 1638.4262, | 36737,   | 116334, | 1636.0729, | 36775,   | 108602, | 1633.7197, |
| 4.094489 |         |            | 4.088608 |         |            | 4.082727 |         |            |
| 36700,   | 119872, | 1638.3642, | 36738,   | 115446, | 1636.0110, | 36776,   | 108818, | 1633.6578, |
| 4.094334 |         |            | 4.088453 |         |            | 4.082573 |         |            |
| 36701,   | 120160, | 1638.3023, | 36739,   | 115772, | 1635.9491, | 36777,   | 110012, | 1633.5959, |
| 4.094180 |         |            | 4.088299 |         |            | 4.082418 |         |            |
| 36702,   | 120772, | 1638.2404, | 36740,   | 116692, | 1635.8872, | 36778,   | 111142, | 1633.5339, |
| 4.094025 |         |            | 4.088144 |         |            | 4.082263 |         |            |
| 36703,   | 120688, | 1638.1785, | 36741,   | 117108, | 1635.8252, | 36779,   | 111136, | 1633.4720, |
| 4.093870 |         |            | 4.087989 |         |            | 4.082108 |         |            |
| 36704,   | 119818, | 1638.1165, | 36742,   | 116726, | 1635.7633, | 36780,   | 110116, | 1633.4101, |
| 4.093715 |         |            | 4.087834 |         |            | 4.081954 |         |            |
| 36705,   | 119168, | 1638.0546, | 36743,   | 116290, | 1635.7014, | 36781,   | 109272, | 1633.3482, |
| 4.093560 |         |            | 4.087680 |         |            | 4.081799 |         |            |
| 36706,   | 119606, | 1637.9927, | 36744,   | 116538, | 1635.6395, | 36782,   | 109484, | 1633.2862, |
| 4.093406 |         |            | 4.087525 |         |            | 4.081644 |         |            |
| 36707,   | 120796, | 1637.9308, | 36745,   | 117270, | 1635.5775, | 36783,   | 110350, | 1633.2243, |
| 4.093251 |         |            | 4.087370 |         |            | 4.081489 |         |            |
| 36708,   | 121542, | 1637.8688, | 36746,   | 117608, | 1635.5156, | 36784,   | 110722, | 1633.1624, |
| 4.093096 |         |            | 4.087215 |         |            | 4.081335 |         |            |
| 36709,   | 121146, | 1637.8069, | 36747,   | 117128, | 1635.4537, | 36785,   | 110140, | 1633.1005, |
| 4.092941 |         |            | 4.087061 |         |            | 4.081180 |         |            |
| 36710,   | 120200, | 1637.7450, | 36748,   | 116430, | 1635.3917, | 36786,   | 109428, | 1633.0385, |
| 4.092787 |         |            | 4.086906 |         |            | 4.081025 |         |            |
| 36711,   | 119846, | 1637.6830, | 36749,   | 116380, | 1635.3298, | 36787,   | 109720, | 1632.9766, |
| 4.092632 |         |            | 4.086751 |         |            | 4.080870 |         |            |
| 36712,   | 120428, | 1637.6211, | 36750,   | 116992, | 1635.2679, | 36788,   | 111066, | 1632.9147, |
| 4.092477 |         |            | 4.086596 |         |            | 4.080716 |         |            |
| 36713,   | 121096, | 1637.5592, | 36751,   | 117318, | 1635.2060, | 36789,   | 112244, | 1632.8527, |
| 4.092322 |         |            | 4.086442 |         |            | 4.080561 |         |            |
| 36714,   | 120876, | 1637.4973, | 36752,   | 116566, | 1635.1440, | 36790,   | 112010, | 1632.7908, |
| 4.092168 |         |            | 4.086287 |         |            | 4.080406 |         |            |
| 36715,   | 119866, | 1637.4353, | 36753,   | 115130, | 1635.0821, | 36791,   | 110406, | 1632.7289, |
| 4.092013 |         |            | 4.086132 |         |            | 4.080251 |         |            |
| 36716,   | 119152, | 1637.3734, | 36754,   | 114232, | 1635.0202, | 36792,   | 108606, | 1632.6670, |
| 4.091858 |         |            | 4.085977 |         |            | 4.080097 |         |            |
| 36717,   | 119536, | 1637.3115, | 36755,   | 114604, | 1634.9583, | 36793,   | 107610, | 1632.6050, |
| 4.091703 |         |            | 4.085823 |         |            | 4.079942 |         |            |

|          |         |            |          |         |            |          |         |            |
|----------|---------|------------|----------|---------|------------|----------|---------|------------|
| 36794,   | 107332, | 1632.5431, | 36832,   | 109006, | 1630.1899, | 36870,   | 106570, | 1627.8367, |
| 4.079787 |         |            | 4.073906 |         |            | 4.068025 |         |            |
| 36795,   | 107026, | 1632.4812, | 36833,   | 109408, | 1630.1280, | 36871,   | 107216, | 1627.7747, |
| 4.079632 |         |            | 4.073752 |         |            | 4.067871 |         |            |
| 36796,   | 106454, | 1632.4193, | 36834,   | 108822, | 1630.0660, | 36872,   | 106952, | 1627.7128, |
| 4.079478 |         |            | 4.073597 |         |            | 4.067716 |         |            |
| 36797,   | 106234, | 1632.3573, | 36835,   | 108070, | 1630.0041, | 36873,   | 106458, | 1627.6509, |
| 4.079323 |         |            | 4.073442 |         |            | 4.067561 |         |            |
| 36798,   | 106948, | 1632.2954, | 36836,   | 108218, | 1629.9422, | 36874,   | 106414, | 1627.5890, |
| 4.079168 |         |            | 4.073287 |         |            | 4.067406 |         |            |
| 36799,   | 108216, | 1632.2335, | 36837,   | 109304, | 1629.8803, | 36875,   | 106664, | 1627.5270, |
| 4.079013 |         |            | 4.073132 |         |            | 4.067252 |         |            |
| 36800,   | 108912, | 1632.1715, | 36838,   | 110300, | 1629.8183, | 36876,   | 106472, | 1627.4651, |
| 4.078859 |         |            | 4.072978 |         |            | 4.067097 |         |            |
| 36801,   | 108400, | 1632.1096, | 36839,   | 110238, | 1629.7564, | 36877,   | 105558, | 1627.4032, |
| 4.078704 |         |            | 4.072823 |         |            | 4.066942 |         |            |
| 36802,   | 107294, | 1632.0477, | 36840,   | 109204, | 1629.6945, | 36878,   | 104564, | 1627.3413, |
| 4.078549 |         |            | 4.072668 |         |            | 4.066787 |         |            |
| 36803,   | 106786, | 1631.9858, | 36841,   | 108078, | 1629.6325, | 36879,   | 104336, | 1627.2793, |
| 4.078394 |         |            | 4.072513 |         |            | 4.066633 |         |            |
| 36804,   | 107320, | 1631.9238, | 36842,   | 107430, | 1629.5706, | 36880,   | 104956, | 1627.2174, |
| 4.078239 |         |            | 4.072359 |         |            | 4.066478 |         |            |
| 36805,   | 108148, | 1631.8619, | 36843,   | 107000, | 1629.5087, | 36881,   | 105626, | 1627.1555, |
| 4.078085 |         |            | 4.072204 |         |            | 4.066323 |         |            |
| 36806,   | 108322, | 1631.8000, | 36844,   | 106260, | 1629.4468, | 36882,   | 105660, | 1627.0935, |
| 4.077930 |         |            | 4.072049 |         |            | 4.066168 |         |            |
| 36807,   | 107932, | 1631.7381, | 36845,   | 105306, | 1629.3848, | 36883,   | 105304, | 1627.0316, |
| 4.077775 |         |            | 4.071894 |         |            | 4.066014 |         |            |
| 36808,   | 108014, | 1631.6761, | 36846,   | 104862, | 1629.3229, | 36884,   | 105370, | 1626.9697, |
| 4.077620 |         |            | 4.071740 |         |            | 4.065859 |         |            |
| 36809,   | 109286, | 1631.6142, | 36847,   | 105376, | 1629.2610, | 36885,   | 106144, | 1626.9078, |
| 4.077466 |         |            | 4.071585 |         |            | 4.065704 |         |            |
| 36810,   | 111118, | 1631.5523, | 36848,   | 106350, | 1629.1991, | 36886,   | 106840, | 1626.8458, |
| 4.077311 |         |            | 4.071430 |         |            | 4.065549 |         |            |
| 36811,   | 112056, | 1631.4904, | 36849,   | 106746, | 1629.1371, | 36887,   | 106426, | 1626.7839, |
| 4.077156 |         |            | 4.071275 |         |            | 4.065395 |         |            |
| 36812,   | 111376, | 1631.4284, | 36850,   | 106128, | 1629.0752, | 36888,   | 104804, | 1626.7220, |
| 4.077001 |         |            | 4.071121 |         |            | 4.065240 |         |            |
| 36813,   | 109846, | 1631.3665, | 36851,   | 105100, | 1629.0133, | 36889,   | 103046, | 1626.6601, |
| 4.076847 |         |            | 4.070966 |         |            | 4.065085 |         |            |
| 36814,   | 108874, | 1631.3046, | 36852,   | 104604, | 1628.9513, | 36890,   | 102276, | 1626.5981, |
| 4.076692 |         |            | 4.070811 |         |            | 4.064930 |         |            |
| 36815,   | 108980, | 1631.2426, | 36853,   | 104872, | 1628.8894, | 36891,   | 102560, | 1626.5362, |
| 4.076537 |         |            | 4.070656 |         |            | 4.064776 |         |            |
| 36816,   | 109328, | 1631.1807, | 36854,   | 105254, | 1628.8275, | 36892,   | 102958, | 1626.4743, |
| 4.076382 |         |            | 4.070502 |         |            | 4.064621 |         |            |
| 36817,   | 108820, | 1631.1188, | 36855,   | 105132, | 1628.7656, | 36893,   | 102728, | 1626.4123, |
| 4.076228 |         |            | 4.070347 |         |            | 4.064466 |         |            |
| 36818,   | 107408, | 1631.0569, | 36856,   | 104678, | 1628.7036, | 36894,   | 102174, | 1626.3504, |
| 4.076073 |         |            | 4.070192 |         |            | 4.064311 |         |            |
| 36819,   | 106108, | 1630.9949, | 36857,   | 104632, | 1628.6417, | 36895,   | 102168, | 1626.2885, |
| 4.075918 |         |            | 4.070037 |         |            | 4.064157 |         |            |
| 36820,   | 105820, | 1630.9330, | 36858,   | 105276, | 1628.5798, | 36896,   | 102988, | 1626.2266, |
| 4.075763 |         |            | 4.069883 |         |            | 4.064002 |         |            |
| 36821,   | 106332, | 1630.8711, | 36859,   | 106030, | 1628.5179, | 36897,   | 103872, | 1626.1646, |
| 4.075609 |         |            | 4.069728 |         |            | 4.063847 |         |            |
| 36822,   | 106764, | 1630.8092, | 36860,   | 106128, | 1628.4559, | 36898,   | 103876, | 1626.1027, |
| 4.075454 |         |            | 4.069573 |         |            | 4.063692 |         |            |
| 36823,   | 106746, | 1630.7472, | 36861,   | 105596, | 1628.3940, | 36899,   | 103000, | 1626.0408, |
| 4.075299 |         |            | 4.069418 |         |            | 4.063538 |         |            |
| 36824,   | 106884, | 1630.6853, | 36862,   | 105304, | 1628.3321, | 36900,   | 102206, | 1625.9789, |
| 4.075144 |         |            | 4.069264 |         |            | 4.063383 |         |            |
| 36825,   | 107892, | 1630.6234, | 36863,   | 105918, | 1628.2702, | 36901,   | 102308, | 1625.9169, |
| 4.074990 |         |            | 4.069109 |         |            | 4.063228 |         |            |
| 36826,   | 109504, | 1630.5614, | 36864,   | 107018, | 1628.2082, | 36902,   | 103054, | 1625.8550, |
| 4.074835 |         |            | 4.068954 |         |            | 4.063073 |         |            |
| 36827,   | 110516, | 1630.4995, | 36865,   | 107444, | 1628.1463, | 36903,   | 103456, | 1625.7931, |
| 4.074680 |         |            | 4.068799 |         |            | 4.062918 |         |            |
| 36828,   | 110072, | 1630.4376, | 36866,   | 106620, | 1628.0844, | 36904,   | 102998, | 1625.7312, |
| 4.074525 |         |            | 4.068645 |         |            | 4.062764 |         |            |
| 36829,   | 108682, | 1630.3757, | 36867,   | 105254, | 1628.0224, | 36905,   | 102234, | 1625.6692, |
| 4.074371 |         |            | 4.068490 |         |            | 4.062609 |         |            |
| 36830,   | 107736, | 1630.3137, | 36868,   | 104650, | 1627.9605, | 36906,   | 102086, | 1625.6073, |
| 4.074216 |         |            | 4.068335 |         |            | 4.062454 |         |            |
| 36831,   | 108042, | 1630.2518, | 36869,   | 105334, | 1627.8986, | 36907,   | 102660, | 1625.5454, |
| 4.074061 |         |            | 4.068180 |         |            | 4.062299 |         |            |





37123, 86088, 1612.1692, 4.028872  
37124, 86708, 1612.1072, 4.028717  
37125, 86640, 1612.0453, 4.028562  
37126, 85814, 1611.9834, 4.028408  
37127, 84990, 1611.9215, 4.028253  
37128, 84950, 1611.8595, 4.028098  
37129, 85608, 1611.7976, 4.027943  
37130, 86080, 1611.7357, 4.027788  
37131, 85662, 1611.6737, 4.027634  
37132, 84656, 1611.6118, 4.027479  
37133, 83972, 1611.5499, 4.027324  
37134, 84116, 1611.4880, 4.027169  
37135, 84638, 1611.4260, 4.027015  
37136, 84748, 1611.3641, 4.026860  
37137, 84296, 1611.3022, 4.026705  
37138, 83922, 1611.2403, 4.026550  
37139, 84246, 1611.1783, 4.026396  
37140, 85042, 1611.1164, 4.026241  
37141, 85486, 1611.0545, 4.026086  
37142, 85158, 1611.9925, 4.025931  
37143, 84564, 1610.9306, 4.025777  
37144, 84536, 1610.8687, 4.025622  
37145, 85158, 1610.8068, 4.025467  
37146, 85592, 1610.7448, 4.025312  
37147, 85008, 1610.6829, 4.025158  
37148, 83604, 1610.6210, 4.025003  
37149, 82458, 1610.5591, 4.024848  
37150, 82338, 1610.4971, 4.024693  
37151, 82852, 1610.4352, 4.024539  
37152, 82924, 1610.3733, 4.024384  
37153, 82086, 1610.3114, 4.024229  
37154, 81004, 1610.2494, 4.024074  
37155, 80768, 1610.1875, 4.023920  
37156, 81614, 1610.1256, 4.023765  
37157, 82718, 1610.0636, 4.023610  
37158, 83166, 1610.0017, 4.023455  
37159, 83000, 1609.9398, 4.023301  
37160, 83064, 1609.8779, 4.023146  
37161, 83880, 1609.8159, 4.022991  
37162, 84924, 1609.7540, 4.022836  
37163, 85154, 1609.6921, 4.022681  
37164, 84198, 1609.6302, 4.022527  
37165, 82786, 1609.5682, 4.022372  
37166, 81944, 1609.5063, 4.022217  
37167, 81926, 1609.4444, 4.022062  
37168, 82086, 1609.3824, 4.021908  
37169, 81812, 1609.3205, 4.021753  
37170, 81298, 1609.2586, 4.021598  
37171, 81240, 1609.1967, 4.021443  
37172, 81870, 1609.1347, 4.021289  
37173, 82556, 1609.0728, 4.021134  
37174, 82574, 1609.0109, 4.020979  
37175, 82074, 1608.9490, 4.020824  
37176, 82000, 1608.8870, 4.020670  
37177, 83016, 1608.8251, 4.020515  
37178, 84574, 1608.7632, 4.020360  
37179, 85342, 1608.7013, 4.020205  
37180, 84580, 1608.6393, 4.020051  
37181, 82920, 1608.5774, 4.019896  
37182, 81700, 1608.5155, 4.019741  
37183, 81596, 1608.4535, 4.019586  
37184, 82054, 1608.3916, 4.019432  
37185, 82088, 1608.3297, 4.019277  
37186, 81450, 1608.2678, 4.019122  
37187, 80828, 1608.2058, 4.018967  
37188, 80914, 1608.1439, 4.018813  
37189, 81530, 1608.0820, 4.018658  
37190, 81888, 1608.0201, 4.018503  
37191, 81544, 1607.9581, 4.018348  
37192, 80954, 1607.8962, 4.018194  
37193, 80848, 1607.8343, 4.018039  
37194, 81304, 1607.7723, 4.017884  
37195, 81640, 1607.7104, 4.017729  
37196, 81260, 1607.6485, 4.017574  
37197, 80466, 1607.5866, 4.017420  
37198, 80152, 1607.5246, 4.017265

37199, 80788, 1607.4627, 4.017110  
37200, 81822, 1607.4008, 4.016955  
37201, 82318, 1607.3389, 4.016801  
37202, 81988, 1607.2769, 4.016646  
37203, 81502, 1607.2150, 4.016491  
37204, 81610, 1607.1531, 4.016336  
37205, 82252, 1607.0912, 4.016182  
37206, 82588, 1607.0292, 4.016027  
37207, 82038, 1606.9673, 4.015872  
37208, 80982, 1606.9054, 4.015717  
37209, 80370, 1606.8434, 4.015563  
37210, 80660, 1606.7815, 4.015408  
37211, 81336, 1606.7196, 4.015253  
37212, 81562, 1606.6577, 4.015098  
37213, 81122, 1606.5957, 4.014944  
37214, 80570, 1606.5338, 4.014789  
37215, 80468, 1606.4719, 4.014634  
37216, 80684, 1606.4100, 4.014479  
37217, 80626, 1606.3480, 4.014325  
37218, 80050, 1606.2861, 4.014170  
37219, 79406, 1606.2242, 4.014015  
37220, 79244, 1606.1622, 4.013860  
37221, 79448, 1606.1003, 4.013706  
37222, 79252, 1606.0384, 4.013551  
37223, 78180, 1605.9765, 4.013396  
37224, 76696, 1605.9145, 4.013241  
37225, 75794, 1605.8526, 4.013086  
37226, 75880, 1605.7907, 4.012932  
37227, 76326, 1605.7288, 4.012777  
37228, 76178, 1605.6668, 4.012622  
37229, 75304, 1605.6049, 4.012467  
37230, 74566, 1605.5430, 4.012313  
37231, 74880, 1605.4811, 4.012158  
37232, 76122, 1605.4191, 4.012003  
37233, 77248, 1605.3572, 4.011848  
37234, 77406, 1605.2953, 4.011694  
37235, 76814, 1605.2333, 4.011539  
37236, 76386, 1605.1714, 4.011384  
37237, 76622, 1605.1095, 4.011229  
37238, 77094, 1605.0476, 4.011075  
37239, 77046, 1604.9856, 4.010920  
37240, 76390, 1604.9237, 4.010765  
37241, 75834, 1604.8618, 4.010610  
37242, 76020, 1604.7999, 4.010456  
37243, 76756, 1604.7379, 4.010301  
37244, 77232, 1604.6760, 4.010146  
37245, 77008, 1604.6141, 4.009991  
37246, 76464, 1604.5521, 4.009837  
37247, 76290, 1604.4902, 4.009682  
37248, 76574, 1604.4283, 4.009527  
37249, 76672, 1604.3664, 4.009372  
37250, 76066, 1604.3044, 4.009218  
37251, 75096, 1604.2425, 4.009063  
37252, 74652, 1604.1806, 4.008908  
37253, 75116, 1604.1187, 4.008753  
37254, 75834, 1604.0567, 4.008599  
37255, 75770, 1603.9948, 4.008444  
37256, 74686, 1603.9329, 4.008289  
37257, 73424, 1603.8710, 4.008134  
37258, 73010, 1603.8090, 4.007979  
37259, 73550, 1603.7471, 4.007825  
37260, 74240, 1603.6852, 4.007670  
37261, 74374, 1603.6232, 4.007515  
37262, 74150, 1603.5613, 4.007360  
37263, 74356, 1603.4994, 4.007206  
37264, 75288, 1603.4375, 4.007051  
37265, 76312, 1603.3755, 4.006896  
37266, 76592, 1603.3136, 4.006741  
37267, 76126, 1603.2517, 4.006587  
37268, 75780, 1603.1898, 4.006432  
37269, 76274, 1603.1278, 4.006277  
37270, 77284, 1603.0659, 4.006122  
37271, 77764, 1603.0040, 4.005968  
37272, 77120, 1602.9420, 4.005813  
37273, 75944, 1602.8801, 4.005658  
37274, 75358, 1602.8182, 4.005503

37275, 75776, 1602.7563, 4.005349  
37276, 76494, 1602.6943, 4.005194  
37277, 76528, 1602.6324, 4.005039  
37278, 75784, 1602.5705, 4.004884  
37279, 75102, 1602.5086, 4.004730  
37280, 75260, 1602.4466, 4.004575  
37281, 76078, 1602.3847, 4.004420  
37282, 76636, 1602.3228, 4.004265  
37283, 76342, 1602.2609, 4.004111  
37284, 75534, 1602.1989, 4.003956  
37285, 74984, 1602.1370, 4.003801  
37286, 74974, 1602.0751, 4.003646  
37287, 75092, 1602.0131, 4.003492  
37288, 74908, 1601.9512, 4.003337  
37289, 74612, 1601.8893, 4.003182  
37290, 74786, 1601.8274, 4.003027  
37291, 75588, 1601.7654, 4.002872  
37292, 76356, 1601.7035, 4.002718  
37293, 76324, 1601.6416, 4.002563  
37294, 75476, 1601.5797, 4.002408  
37295, 74632, 1601.5177, 4.002253  
37296, 74498, 1601.4558, 4.002099  
37297, 74898, 1601.3939, 4.001944  
37298, 74992, 1601.3320, 4.001789  
37299, 74336, 1601.2700, 4.001634  
37300, 73424, 1601.2081, 4.001480  
37301, 73084, 1601.1462, 4.001325  
37302, 73428, 1601.0842, 4.001170  
37303, 73632, 1601.0223, 4.001015  
37304, 72864, 1600.9604, 4.000861  
37305, 71290, 1600.8985, 4.000706  
37306, 69938, 1600.8365, 4.000551  
37307, 69560, 1600.7746, 4.000396  
37308, 69852, 1600.7127, 4.000242  
37309, 69900, 1600.6508, 4.000087  
37310, 69342, 1600.5888, 3.999932  
37311, 68842, 1600.5269, 3.999777  
37312, 69262, 1600.4650, 3.999623  
37313, 70540, 1600.4030, 3.999468  
37314, 71610, 1600.3411, 3.999313  
37315, 71550, 1600.2792, 3.999158  
37316, 70648, 1600.2173, 3.999004  
37317, 70108, 1600.1553, 3.998849  
37318, 70794, 1600.0934, 3.998694  
37319, 72312, 1600.0315, 3.998539  
37320, 73522, 1599.9696, 3.998385  
37321, 73794, 1599.9076, 3.998230  
37322, 73562, 1599.8457, 3.998075  
37323, 73636, 1599.7838, 3.997920  
37324, 74154, 1599.7219, 3.997765  
37325, 74454, 1599.6599, 3.997611  
37326, 73974, 1599.5980, 3.997456  
37327, 73018, 1599.5361, 3.997301  
37328, 72466, 1599.4741, 3.997146  
37329, 72754, 1599.4122, 3.996992  
37330, 73410, 1599.3503, 3.996837  
37331, 73630, 1599.2884, 3.996682  
37332, 73214, 1599.2264, 3.996527  
37333, 72686, 1599.1645, 3.996373  
37334, 72506, 1599.1026, 3.996218  
37335, 72418, 1599.0407, 3.996063  
37336, 71760, 1598.9787, 3.995908  
37337, 70452, 1598.9168, 3.995754  
37338, 69294, 1598.8549, 3.995599  
37339, 69224, 1598.7929, 3.995444  
37340, 70226, 1598.7310, 3.995289  
37341, 71256, 1598.6691, 3.995135  
37342, 71334, 1598.6072, 3.994980  
37343, 70556, 1598.5452, 3.994825  
37344, 69910, 1598.4833, 3.994670  
37345, 70108, 1598.4214, 3.994516  
37346, 70802, 1598.3595, 3.994361  
37347, 71070, 1598.2975, 3.994206  
37348, 70584, 1598.2356, 3.994051  
37349, 70008, 1598.1737, 3.993897  
37350, 70152, 1598.1118, 3.993742

37351, 70920, 1598.0498, 3.993587  
37352, 71334, 1597.9879, 3.993432  
37353, 70632, 1597.9260, 3.993278  
37354, 69190, 1597.8640, 3.993123  
37355, 68156, 1597.8021, 3.992968  
37356, 68196, 1597.7402, 3.992813  
37357, 68852, 1597.6783, 3.992658  
37358, 69170, 1597.6163, 3.992504  
37359, 68880, 1597.5544, 3.992349  
37360, 68694, 1597.4925, 3.992194  
37361, 69398, 1597.4306, 3.992039  
37362, 70854, 1597.3686, 3.991885  
37363, 72070, 1597.3067, 3.991730  
37364, 72304, 1597.2448, 3.991575  
37365, 71800, 1597.1828, 3.991420  
37366, 71394, 1597.1209, 3.991266  
37367, 71450, 1597.0590, 3.991111  
37368, 71478, 1596.9971, 3.990956  
37369, 70870, 1596.9351, 3.990801  
37370, 69802, 1596.8732, 3.990647  
37371, 69164, 1596.8113, 3.990492  
37372, 69536, 1596.7494, 3.990337  
37373, 70376, 1596.6874, 3.990182  
37374, 70562, 1596.6255, 3.990028  
37375, 69592, 1596.5636, 3.989873  
37376, 68180, 1596.5017, 3.989718  
37377, 67462, 1596.4397, 3.989563  
37378, 67748, 1596.3778, 3.989409  
37379, 68256, 1596.3159, 3.989254  
37380, 68068, 1596.2539, 3.989099  
37381, 67196, 1596.1920, 3.988944  
37382, 66542, 1596.1301, 3.988790  
37383, 66826, 1596.0682, 3.988635  
37384, 67762, 1596.0062, 3.988480  
37385, 68452, 1595.9443, 3.988325  
37386, 68452, 1595.8824, 3.988171  
37387, 68256, 1595.8205, 3.988016  
37388, 68656, 1595.7585, 3.987861  
37389, 69740, 1595.6966, 3.987706  
37390, 70794, 1595.6347, 3.987551  
37391, 71146, 1595.5727, 3.987397  
37392, 70882, 1595.5108, 3.987242  
37393, 70700, 1595.4489, 3.987087  
37394, 70980, 1595.3870, 3.986932  
37395, 71366, 1595.3250, 3.986778  
37396, 71282, 1595.2631, 3.986623  
37397, 70732, 1595.2012, 3.986468  
37398, 70346, 1595.1393, 3.986313  
37399, 70618, 1595.0773, 3.986159  
37400, 71218, 1595.0154, 3.986004  
37401, 71324, 1594.9535, 3.985849  
37402, 70556, 1594.8916, 3.985694  
37403, 69440, 1594.8296, 3.985540  
37404, 68814, 1594.7677, 3.985385  
37405, 68866, 1594.7058, 3.985230  
37406, 68948, 1594.6438, 3.985075  
37407, 68406, 1594.5819, 3.984921  
37408, 67342, 1594.5200, 3.984766  
37409, 66490, 1594.4581, 3.984611  
37410, 66290, 1594.3961, 3.984456  
37411, 66364, 1594.3342, 3.984302  
37412, 65980, 1594.2723, 3.984147  
37413, 65046, 1594.2104, 3.983992  
37414, 64284, 1594.1484, 3.983837  
37415, 64452, 1594.0865, 3.983683  
37416, 65424, 1594.0246, 3.983528  
37417, 66306, 1593.9626, 3.983373  
37418, 66434, 1593.9007, 3.983218  
37419, 66078, 1593.8388, 3.983064  
37420, 66054, 1593.7769, 3.982909  
37421, 66660, 1593.7149, 3.982754  
37422, 67262, 1593.6530, 3.982599  
37423, 66990, 1593.5911, 3.982444  
37424, 65766, 1593.5292, 3.982290  
37425, 64444, 1593.4672, 3.982135  
37426, 63892, 1593.4053, 3.981980

37427, 64126, 1593.3434, 3.981825  
37428, 64436, 1593.2815, 3.981671  
37429, 64328, 1593.2195, 3.981516  
37430, 64092, 1593.1576, 3.981361  
37431, 64374, 1593.0957, 3.981206  
37432, 65304, 1593.0337, 3.981052  
37433, 66312, 1592.9718, 3.980897  
37434, 66832, 1592.9099, 3.980742  
37435, 67008, 1592.8480, 3.980587  
37436, 67474, 1592.7860, 3.980433  
37437, 68468, 1592.7241, 3.980278  
37438, 69406, 1592.6622, 3.980123  
37439, 69470, 1592.6003, 3.979968  
37440, 68602, 1592.5383, 3.979814  
37441, 67634, 1592.4764, 3.979659  
37442, 67354, 1592.4145, 3.979504  
37443, 67578, 1592.3525, 3.979349  
37444, 67366, 1592.2906, 3.979195  
37445, 66146, 1592.2287, 3.979040  
37446, 64496, 1592.1668, 3.978885  
37447, 63588, 1592.1048, 3.978730  
37448, 63934, 1592.0429, 3.978576  
37449, 64844, 1591.9810, 3.978421  
37450, 65264, 1591.9191, 3.978266  
37451, 64972, 1591.8571, 3.978111  
37452, 64782, 1591.7952, 3.977957  
37453, 65500, 1591.7333, 3.977802  
37454, 66894, 1591.6714, 3.977647  
37455, 67892, 1591.6094, 3.977492  
37456, 67722, 1591.5475, 3.977337  
37457, 66736, 1591.4856, 3.977183  
37458, 65942, 1591.4236, 3.977028  
37459, 65878, 1591.3617, 3.976873  
37460, 66136, 1591.2998, 3.976718  
37461, 66048, 1591.2379, 3.976564  
37462, 65566, 1591.1759, 3.976409  
37463, 65252, 1591.1140, 3.976254  
37464, 65418, 1591.0521, 3.976099  
37465, 65556, 1590.9902, 3.975945  
37466, 64896, 1590.9282, 3.975790  
37467, 63454, 1590.8663, 3.975635  
37468, 62272, 1590.8044, 3.975480  
37469, 62420, 1590.7424, 3.975326  
37470, 63832, 1590.6805, 3.975171  
37471, 65288, 1590.6186, 3.975016  
37472, 65670, 1590.5567, 3.974861  
37473, 65016, 1590.4947, 3.974707  
37474, 64314, 1590.4328, 3.974552  
37475, 64242, 1590.3709, 3.974397  
37476, 64468, 1590.3090, 3.974242  
37477, 64222, 1590.2470, 3.974088  
37478, 63478, 1590.1851, 3.973933  
37479, 63196, 1590.1232, 3.973778  
37480, 64280, 1590.0613, 3.973623  
37481, 66462, 1589.9993, 3.973469  
37482, 68384, 1589.9374, 3.973314  
37483, 68898, 1589.8755, 3.973159  
37484, 68122, 1589.8135, 3.973004  
37485, 67100, 1589.7516, 3.972850  
37486, 66548, 1589.6897, 3.972695  
37487, 66166, 1589.6278, 3.972540  
37488, 65220, 1589.5658, 3.972385  
37489, 63654, 1589.5039, 3.972230  
37490, 62304, 1589.4420, 3.972076  
37491, 62010, 1589.3801, 3.971921  
37492, 62644, 1589.3181, 3.971766  
37493, 63310, 1589.2562, 3.971611  
37494, 63356, 1589.1943, 3.971457  
37495, 63066, 1589.1324, 3.971302  
37496, 63158, 1589.0704, 3.971147  
37497, 63776, 1589.0085, 3.970992  
37498, 64208, 1588.9466, 3.970838  
37499, 63740, 1588.8846, 3.970683  
37500, 62548, 1588.8227, 3.970528  
37501, 61628, 1588.7608, 3.970373  
37502, 61706, 1588.6989, 3.970219

37503, 62482, 1588.6369, 3.970064  
37504, 63048, 1588.5750, 3.969909  
37505, 62956, 1588.5131, 3.969754  
37506, 62678, 1588.4512, 3.969600  
37507, 62920, 1588.3892, 3.969445  
37508, 63664, 1588.3273, 3.969290  
37509, 64128, 1588.2654, 3.969135  
37510, 63708, 1588.2034, 3.968981  
37511, 62726, 1588.1415, 3.968826  
37512, 62138, 1588.0796, 3.968671  
37513, 62430, 1588.0177, 3.968516  
37514, 63096, 1587.9557, 3.968362  
37515, 63280, 1587.8938, 3.968207  
37516, 62782, 1587.8319, 3.968052  
37517, 62276, 1587.7700, 3.967897  
37518, 62426, 1587.7080, 3.967742  
37519, 63034, 1587.6461, 3.967588  
37520, 63224, 1587.5842, 3.967433  
37521, 62498, 1587.5223, 3.967278  
37522, 61350, 1587.4603, 3.967123  
37523, 60758, 1587.3984, 3.966969  
37524, 61092, 1587.3365, 3.966814  
37525, 61780, 1587.2745, 3.966659  
37526, 62058, 1587.2126, 3.966504  
37527, 61902, 1587.1507, 3.966350  
37528, 61944, 1587.0888, 3.966195  
37529, 62554, 1587.0268, 3.966040  
37530, 63178, 1586.9649, 3.965885  
37531, 62892, 1586.9030, 3.965731  
37532, 61486, 1586.8411, 3.965576  
37533, 59850, 1586.7791, 3.965421  
37534, 59100, 1586.7172, 3.965266  
37535, 59434, 1586.6553, 3.965112  
37536, 60026, 1586.5933, 3.964957  
37537, 60040, 1586.5314, 3.964802  
37538, 59578, 1586.4695, 3.964647  
37539, 59456, 1586.4076, 3.964493  
37540, 60128, 1586.3456, 3.964338  
37541, 61064, 1586.2837, 3.964183  
37542, 61372, 1586.2218, 3.964028  
37543, 60864, 1586.1599, 3.963874  
37544, 60292, 1586.0979, 3.963719  
37545, 60456, 1586.0360, 3.963564  
37546, 61214, 1585.9741, 3.963409  
37547, 61624, 1585.9122, 3.963255  
37548, 61094, 1585.8502, 3.963100  
37549, 60104, 1585.7883, 3.962945  
37550, 59706, 1585.7264, 3.962790  
37551, 60296, 1585.6644, 3.962635  
37552, 61156, 1585.6025, 3.962481  
37553, 61276, 1585.5406, 3.962326  
37554, 60536, 1585.4787, 3.962171  
37555, 59854, 1585.4167, 3.962016  
37556, 60136, 1585.3548, 3.961862  
37557, 61264, 1585.2929, 3.961707  
37558, 62270, 1585.2310, 3.961552  
37559, 62402, 1585.1690, 3.961397  
37560, 61866, 1585.1071, 3.961243  
37561, 61392, 1585.0452, 3.961088  
37562, 61250, 1584.9832, 3.960933  
37563, 61018, 1584.9213, 3.960778  
37564, 60282, 1584.8594, 3.960624  
37565, 59394, 1584.7975, 3.960469  
37566, 59220, 1584.7355, 3.960314  
37567, 60130, 1584.6736, 3.960159  
37568, 61440, 1584.6117, 3.960005  
37569, 62048, 1584.5498, 3.959850  
37570, 61608, 1584.4878, 3.959695  
37571, 60850, 1584.4259, 3.959540  
37572, 60688, 1584.3640, 3.959386  
37573, 61134, 1584.3021, 3.959231  
37574, 61302, 1584.2401, 3.959076  
37575, 60526, 1584.1782, 3.958921  
37576, 59198, 1584.1163, 3.958767  
37577, 58430, 1584.0543, 3.958612  
37578, 58808, 1583.9924, 3.958457

37579, 59792, 1583.9305, 3.958302  
37580, 60326, 1583.8686, 3.958148  
37581, 59996, 1583.8066, 3.957993  
37582, 59354, 1583.7447, 3.957838  
37583, 59108, 1583.6828, 3.957683  
37584, 59240, 1583.6209, 3.957528  
37585, 59142, 1583.5589, 3.957374  
37586, 58560, 1583.4970, 3.957219  
37587, 58110, 1583.4351, 3.957064  
37588, 58648, 1583.3731, 3.956909  
37589, 60172, 1583.3112, 3.956755  
37590, 61602, 1583.2503, 3.956600  
37591, 61786, 1583.1874, 3.956445  
37592, 60632, 1583.1254, 3.956290  
37593, 59162, 1583.0635, 3.956136  
37594, 58362, 1583.0016, 3.955981  
37595, 58256, 1582.9397, 3.955826  
37596, 58100, 1582.8777, 3.955671  
37597, 57476, 1582.8158, 3.955517  
37598, 56814, 1582.7539, 3.955362  
37599, 56844, 1582.6920, 3.955207  
37600, 57584, 1582.6300, 3.955052  
37601, 58220, 1582.5681, 3.954898  
37602, 57990, 1582.5062, 3.954743  
37603, 57072, 1582.4442, 3.954588  
37604, 56378, 1582.3823, 3.954433  
37605, 56548, 1582.3204, 3.954279  
37606, 57282, 1582.2585, 3.954124  
37607, 57830, 1582.1965, 3.953969  
37608, 57920, 1582.1346, 3.953814  
37609, 58024, 1582.0727, 3.953660  
37610, 58634, 1582.0108, 3.953505  
37611, 59414, 1581.9488, 3.953350  
37612, 59462, 1581.8869, 3.953195  
37613, 58296, 1581.8250, 3.953041  
37614, 56542, 1581.7630, 3.952886  
37615, 55384, 1581.7011, 3.952731  
37616, 55410, 1581.6392, 3.952576  
37617, 56112, 1581.5773, 3.952421  
37618, 56582, 1581.5153, 3.952267  
37619, 56510, 1581.4534, 3.952112  
37620, 56378, 1581.3915, 3.951957  
37621, 56672, 1581.3296, 3.951802  
37622, 57174, 1581.2676, 3.951648  
37623, 57248, 1581.2057, 3.951493  
37624, 56712, 1581.1438, 3.951338  
37625, 56198, 1581.0819, 3.951183  
37626, 56460, 1581.0199, 3.951029  
37627, 57444, 1580.9580, 3.950874  
37628, 58266, 1580.8961, 3.950719  
37629, 58154, 1580.8341, 3.950564  
37630, 57330, 1580.7722, 3.950410  
37631, 56698, 1580.7103, 3.950255  
37632, 56804, 1580.6484, 3.950100  
37633, 57230, 1580.5864, 3.949945  
37634, 57186, 1580.5245, 3.949791  
37635, 56568, 1580.4626, 3.949636  
37636, 56150, 1580.4007, 3.949481  
37637, 56660, 1580.3387, 3.949326  
37638, 57834, 1580.2768, 3.949172  
37639, 58610, 1580.2149, 3.949017  
37640, 58276, 1580.1529, 3.948862  
37641, 57270, 1580.0910, 3.948707  
37642, 56666, 1580.0291, 3.948553  
37643, 56936, 1579.9672, 3.948398  
37644, 57450, 1579.9052, 3.948243  
37645, 57310, 1579.8433, 3.948088  
37646, 56508, 1579.7814, 3.947934  
37647, 56026, 1579.7195, 3.947779  
37648, 56704, 1579.6575, 3.947624  
37649, 58192, 1579.5956, 3.947469  
37650, 59236, 1579.5337, 3.947314  
37651, 59000, 1579.4718, 3.947160  
37652, 57952, 1579.4098, 3.947005  
37653, 57302, 1579.3479, 3.946850  
37654, 57694, 1579.2860, 3.946695

37655, 58606, 1579.2240, 3.946541  
37656, 59046, 1579.1621, 3.946386  
37657, 58678, 1579.1002, 3.946231  
37658, 58050, 1579.0383, 3.946076  
37659, 57750, 1578.9763, 3.945922  
37660, 57644, 1578.9144, 3.945767  
37661, 57094, 1578.8525, 3.945612  
37662, 55920, 1578.7906, 3.945457  
37663, 54782, 1578.7286, 3.945303  
37664, 54524, 1578.6667, 3.945148  
37665, 55184, 1578.6048, 3.944993  
37666, 55916, 1578.5428, 3.944838  
37667, 55934, 1578.4809, 3.944684  
37668, 55400, 1578.4190, 3.944529  
37669, 55178, 1578.3571, 3.944374  
37670, 55740, 1578.2951, 3.944219  
37671, 56570, 1578.2332, 3.944065  
37672, 56730, 1578.1713, 3.943910  
37673, 55958, 1578.1094, 3.943755  
37674, 55652, 1578.0475, 3.943600  
37675, 54806, 1577.9855, 3.943446  
37676, 55408, 1577.9236, 3.943291  
37677, 55960, 1577.8617, 3.943136  
37678, 55652, 1577.7997, 3.942981  
37679, 54602, 1577.7378, 3.942827  
37680, 53606, 1577.6759, 3.942672  
37681, 53180, 1577.6139, 3.942517  
37682, 53074, 1577.5520, 3.942362  
37683, 52700, 1577.4901, 3.942207  
37684, 51944, 1577.4282, 3.942053  
37685, 51272, 1577.3662, 3.941898  
37686, 51056, 1577.3043, 3.941743  
37687, 51020, 1577.2424, 3.941588  
37688, 50600, 1577.1805, 3.941434  
37689, 49774, 1577.1185, 3.941279  
37690, 49338, 1577.0566, 3.941124  
37691, 50094, 1576.9947, 3.940969  
37692, 51878, 1576.9327, 3.940815  
37693, 53530, 1576.8708, 3.940660  
37694, 53968, 1576.8089, 3.940505  
37695, 53204, 1576.7470, 3.940350  
37696, 52182, 1576.6850, 3.940196  
37697, 51702, 1576.6231, 3.940041  
37698, 51646, 1576.5612, 3.939886  
37699, 51324, 1576.4993, 3.939731  
37700, 50462, 1576.4373, 3.939577  
37701, 49582, 1576.3754, 3.939422  
37702, 49380, 1576.3135, 3.939267  
37703, 49894, 1576.2516, 3.939112  
37704, 50468, 1576.1896, 3.938958  
37705, 50624, 1576.1277, 3.938803  
37706, 50638, 1576.0658, 3.938648  
37707, 51172, 1576.0038, 3.938493  
37708, 52354, 1575.9419, 3.938339  
37709, 53456, 1575.8800, 3.938184  
37710, 53604, 1575.8181, 3.938029  
37711, 52794, 1575.7561, 3.937874  
37712, 51882, 1575.6942, 3.937720  
37713, 51672, 1575.6323, 3.937565  
37714, 52056, 1575.5704, 3.937410  
37715, 52208, 1575.5084, 3.937255  
37716, 51660, 1575.4465, 3.937100  
37717, 50864, 1575.3846, 3.936946  
37718, 50682, 1575.3227, 3.936791  
37719, 51330, 1575.2607, 3.936636  
37720, 52140, 1575.1988, 3.936481  
37721, 52278, 1575.1369, 3.936327  
37722, 51688, 1575.0749, 3.936172  
37723, 51086, 1575.0130, 3.936017  
37724, 51066, 1574.9511, 3.935862  
37725, 51450, 1574.8892, 3.935708  
37726, 51612, 1574.8272, 3.935553  
37727, 51362, 1574.7653, 3.935398  
37728, 51266, 1574.7034, 3.935243  
37729, 51932, 1574.6415, 3.935089  
37730, 53172, 1574.5795, 3.934934

37731, 54034, 1574.5176, 3.934779  
37732, 53796, 1574.4557, 3.934624  
37733, 52726, 1574.3937, 3.934470  
37734, 51800, 1574.3318, 3.934315  
37735, 51628, 1574.2699, 3.934160  
37736, 51862, 1574.2080, 3.934005  
37737, 51680, 1574.1460, 3.933851  
37738, 50756, 1574.0841, 3.933696  
37739, 49612, 1574.0222, 3.933541  
37740, 48944, 1573.9603, 3.933386  
37741, 48858, 1573.8983, 3.933232  
37742, 48888, 1573.8364, 3.933077  
37743, 48694, 1573.7745, 3.932922  
37744, 48522, 1573.7126, 3.932767  
37745, 48858, 1573.6506, 3.932613  
37746, 49720, 1573.5887, 3.932458  
37747, 50556, 1573.5268, 3.932303  
37748, 50906, 1573.4648, 3.932148  
37749, 50986, 1573.4029, 3.931993  
37750, 51406, 1573.3410, 3.931839  
37751, 52306, 1573.2791, 3.931684  
37752, 52972, 1573.2171, 3.931529  
37753, 52540, 1573.1552, 3.931374  
37754, 51014, 1573.0933, 3.931220  
37755, 49466, 1573.0314, 3.931065  
37756, 49020, 1572.9694, 3.930910  
37757, 49738, 1572.9075, 3.930755  
37758, 50660, 1572.8456, 3.930601  
37759, 50888, 1572.7836, 3.930446  
37760, 50548, 1572.7217, 3.930291  
37761, 50496, 1572.6598, 3.930136  
37762, 51214, 1572.5979, 3.929982  
37763, 52168, 1572.5359, 3.929827  
37764, 52426, 1572.4740, 3.929672  
37765, 51742, 1572.4121, 3.929517  
37766, 50858, 1572.3502, 3.929363  
37767, 50666, 1572.2882, 3.929208  
37768, 51228, 1572.2263, 3.929053  
37769, 51786, 1572.1644, 3.928898  
37770, 51694, 1572.1025, 3.928744  
37771, 51100, 1572.0405, 3.928589  
37772, 50660, 1571.9786, 3.928434  
37773, 50654, 1571.9167, 3.928279  
37774, 50658, 1571.8547, 3.928125  
37775, 50182, 1571.7928, 3.927970  
37776, 49402, 1571.7309, 3.927815  
37777, 49090, 1571.6690, 3.927660  
37778, 49678, 1571.6070, 3.927506  
37779, 50700, 1571.5451, 3.927351  
37780, 51262, 1571.4832, 3.927196  
37781, 51086, 1571.4213, 3.927041  
37782, 50854, 1571.3593, 3.926886  
37783, 51398, 1571.2974, 3.926732  
37784, 52672, 1571.2355, 3.926577  
37785, 53720, 1571.1735, 3.926422  
37786, 53770, 1571.1116, 3.926267  
37787, 53116, 1571.0497, 3.926113  
37788, 52830, 1570.9878, 3.925958  
37789, 53508, 1570.9258, 3.925803  
37790, 54568, 1570.8639, 3.925648  
37791, 54864, 1570.8020, 3.925494  
37792, 53964, 1570.7401, 3.925339  
37793, 52594, 1570.6781, 3.925184  
37794, 51772, 1570.6162, 3.925029  
37795, 51692, 1570.5543, 3.924875  
37796, 51630, 1570.4924, 3.924720  
37797, 50914, 1570.4304, 3.924565  
37798, 49836, 1570.3685, 3.924410  
37799, 49304, 1570.3066, 3.924256  
37800, 49730, 1570.2446, 3.924101  
37801, 50476, 1570.1827, 3.923946  
37802, 50516, 1570.1208, 3.923791  
37803, 49638, 1570.0589, 3.923637  
37804, 48716, 1569.9969, 3.923482  
37805, 48770, 1569.9350, 3.923327  
37806, 49886, 1569.8731, 3.923172

37807, 51164, 1569.8112, 3.923018  
37808, 51744, 1569.7492, 3.922863  
37809, 51628, 1569.6873, 3.922708  
37810, 51484, 1569.6254, 3.922553  
37811, 51690, 1569.5634, 3.922398  
37812, 51866, 1569.5015, 3.922244  
37813, 51410, 1569.4396, 3.922089  
37814, 50300, 1569.3777, 3.921934  
37815, 49228, 1569.3157, 3.921779  
37816, 48804, 1569.2538, 3.921625  
37817, 48938, 1569.1919, 3.921470  
37818, 49064, 1569.1300, 3.921315  
37819, 48946, 1569.0680, 3.921160  
37820, 49010, 1569.0061, 3.921006  
37821, 49774, 1568.9442, 3.920851  
37822, 51054, 1568.8823, 3.920696  
37823, 51972, 1568.8203, 3.920541  
37824, 51822, 1568.7584, 3.920387  
37825, 50834, 1568.6965, 3.920232  
37826, 49920, 1568.6345, 3.920077  
37827, 49686, 1568.5726, 3.919922  
37828, 49838, 1568.5107, 3.919768  
37829, 49614, 1568.4488, 3.919613  
37830, 48712, 1568.3868, 3.919458  
37831, 47606, 1568.3249, 3.919303  
37832, 46928, 1568.2630, 3.919149  
37833, 46736, 1568.2011, 3.918994  
37834, 46562, 1568.1391, 3.918839  
37835, 46076, 1568.0772, 3.918684  
37836, 45574, 1568.0153, 3.918530  
37837, 45574, 1567.9533, 3.918375  
37838, 46070, 1567.8914, 3.918220  
37839, 46422, 1567.8295, 3.918065  
37840, 46068, 1567.7676, 3.917911  
37841, 45230, 1567.7056, 3.917756  
37842, 44730, 1567.6437, 3.917601  
37843, 45092, 1567.5818, 3.917446  
37844, 45924, 1567.5199, 3.917291  
37845, 46404, 1567.4579, 3.917137  
37846, 46236, 1567.3960, 3.916982  
37847, 46004, 1567.3341, 3.916827  
37848, 46452, 1567.2722, 3.916672  
37849, 47556, 1567.2102, 3.916518  
37850, 48494, 1567.1483, 3.916363  
37851, 48576, 1567.0864, 3.916208  
37852, 48030, 1567.0244, 3.916053  
37853, 47716, 1566.9625, 3.915899  
37854, 48116, 1566.9006, 3.915744  
37855, 48782, 1566.8387, 3.915589  
37856, 48944, 1566.7767, 3.915434  
37857, 48474, 1566.7148, 3.915280  
37858, 48116, 1566.6529, 3.915125  
37859, 48618, 1566.5910, 3.914970  
37860, 49792, 1566.5290, 3.914815  
37861, 50666, 1566.4671, 3.914661  
37862, 50514, 1566.4052, 3.914506  
37863, 49626, 1566.3432, 3.914351  
37864, 48944, 1566.2813, 3.914196  
37865, 49002, 1566.2194, 3.914042  
37866, 49420, 1566.1575, 3.913887  
37867, 49502, 1566.0955, 3.913732  
37868, 49148, 1566.0336, 3.913577  
37869, 48986, 1565.9717, 3.913423  
37870, 49562, 1565.9098, 3.913268  
37871, 50626, 1565.8478, 3.913113  
37872, 51374, 1565.7859, 3.912958  
37873, 51368, 1565.7240, 3.912804  
37874, 51004, 1565.6621, 3.912649  
37875, 50990, 1565.6001, 3.912494  
37876, 51386, 1565.5382, 3.912339  
37877, 51526, 1565.4763, 3.912184  
37878, 50806, 1565.4143, 3.912030  
37879, 49498, 1565.3524, 3.911875  
37880, 48518, 1565.2905, 3.911720  
37881, 48424, 1565.2286, 3.911565  
37882, 48784, 1565.1666, 3.911411

37883, 48716, 1565.1047, 3.911256  
37884, 47948, 1565.0428, 3.911101  
37885, 47174, 1564.9809, 3.910946  
37886, 47282, 1564.9189, 3.910792  
37887, 48354, 1564.8570, 3.910637  
37888, 49604, 1564.7951, 3.910482  
37889, 50264, 1564.7331, 3.910327  
37890, 50378, 1564.6712, 3.910173  
37891, 50562, 1564.6093, 3.910018  
37892, 51112, 1564.5474, 3.909863  
37893, 51578, 1564.4854, 3.909708  
37894, 51360, 1564.4235, 3.909554  
37895, 50568, 1564.3616, 3.909399  
37896, 50018, 1564.2997, 3.909244  
37897, 50306, 1564.2377, 3.909089  
37898, 51012, 1564.1758, 3.908935  
37899, 51046, 1564.1139, 3.908780  
37900, 49808, 1564.0520, 3.908625  
37901, 47876, 1563.9900, 3.908470  
37902, 46406, 1563.9281, 3.908316  
37903, 45948, 1563.8662, 3.908161  
37904, 45988, 1563.8042, 3.908006  
37905, 45720, 1563.7423, 3.907851  
37906, 45050, 1563.6804, 3.907697  
37907, 44698, 1563.6185, 3.907542  
37908, 45280, 1563.5565, 3.907387  
37909, 46464, 1563.4946, 3.907232  
37910, 47248, 1563.4327, 3.907077  
37911, 46980, 1563.3708, 3.906923  
37912, 45986, 1563.3088, 3.906768  
37913, 45116, 1563.2469, 3.906613  
37914, 44818, 1563.1850, 3.906458  
37915, 44808, 1563.1230, 3.906304  
37916, 44654, 1563.0611, 3.906149  
37917, 44422, 1562.9992, 3.905994  
37918, 44538, 1562.9373, 3.905839  
37919, 45074, 1562.8753, 3.905685  
37920, 45428, 1562.8134, 3.905530  
37921, 44950, 1562.7515, 3.905375  
37922, 43782, 1562.6896, 3.905220  
37923, 42874, 1562.6276, 3.905066  
37924, 43050, 1562.5657, 3.904911  
37925, 44118, 1562.5038, 3.904756  
37926, 45044, 1562.4419, 3.904601  
37927, 45040, 1562.3799, 3.904447  
37928, 44312, 1562.3180, 3.904292  
37929, 43722, 1562.2561, 3.904137  
37930, 43718, 1562.1941, 3.903982  
37931, 43924, 1562.1322, 3.903828  
37932, 43720, 1562.0703, 3.903673  
37933, 43124, 1562.0084, 3.903518  
37934, 42856, 1561.9464, 3.903363  
37935, 43452, 1561.8845, 3.903209  
37936, 44564, 1561.8226, 3.903054  
37937, 45260, 1561.7607, 3.902899  
37938, 45056, 1561.6987, 3.902744  
37939, 44430, 1561.6368, 3.902590  
37940, 44272, 1561.5749, 3.902435  
37941, 44868, 1561.5130, 3.902280  
37942, 45610, 1561.4510, 3.902125  
37943, 45766, 1561.3891, 3.901970  
37944, 45306, 1561.3272, 3.901816  
37945, 44868, 1561.2652, 3.901661  
37946, 44902, 1561.2033, 3.901506  
37947, 45140, 1561.1414, 3.901351  
37948, 44978, 1561.0795, 3.901197  
37949, 44350, 1561.0175, 3.901042  
37950, 43936, 1560.9556, 3.900887  
37951, 44390, 1560.8937, 3.900732  
37952, 45518, 1560.8318, 3.900578  
37953, 46384, 1560.7698, 3.900423  
37954, 46312, 1560.7079, 3.900268  
37955, 45624, 1560.6460, 3.900113  
37956, 45254, 1560.5840, 3.899959  
37957, 45660, 1560.5221, 3.899804  
37958, 46342, 1560.4602, 3.899649

37959, 46488, 1560.3983, 3.899494  
37960, 45982, 1560.3363, 3.899340  
37961, 45550, 1560.2744, 3.899185  
37962, 45866, 1560.2125, 3.899030  
37963, 46694, 1560.1506, 3.898875  
37964, 47078, 1560.0886, 3.898721  
37965, 46418, 1560.0267, 3.898566  
37966, 45174, 1559.9648, 3.898411  
37967, 44394, 1559.9029, 3.898256  
37968, 44600, 1559.8409, 3.898102  
37969, 45302, 1559.7790, 3.897947  
37970, 45690, 1559.7171, 3.897792  
37971, 45602, 1559.6551, 3.897637  
37972, 45648, 1559.5932, 3.897483  
37973, 46358, 1559.5313, 3.897328  
37974, 47418, 1559.4694, 3.897173  
37975, 47902, 1559.4074, 3.897018  
37976, 47270, 1559.3455, 3.896863  
37977, 45956, 1559.2836, 3.896709  
37978, 44888, 1559.2217, 3.896554  
37979, 44550, 1559.1597, 3.896399  
37980, 44632, 1559.0978, 3.896244  
37981, 44616, 1559.0359, 3.896090  
37982, 44488, 1559.9739, 3.895935  
37983, 44704, 1559.9120, 3.895780  
37984, 45456, 1559.8501, 3.895625  
37985, 46252, 1559.7882, 3.895471  
37986, 46350, 1559.7262, 3.895316  
37987, 45600, 1559.6643, 3.895161  
37988, 44654, 1559.6024, 3.895006  
37989, 44294, 1559.5405, 3.894852  
37990, 44584, 1559.4785, 3.894697  
37991, 44882, 1559.4166, 3.894542  
37992, 44612, 1559.3547, 3.894387  
37993, 43902, 1559.2928, 3.894233  
37994, 43362, 1559.2308, 3.894078  
37995, 43308, 1559.1689, 3.893923  
37996, 43442, 1559.1070, 3.893768  
37997, 43308, 1559.0450, 3.893614  
37998, 42982, 1559.9831, 3.893459  
37999, 43048, 1559.9212, 3.893304  
38000, 43878, 1559.8593, 3.893149  
38001, 45070, 1559.7973, 3.892995  
38002, 45750, 1559.7354, 3.892840  
38003, 45504, 1559.6735, 3.892685  
38004, 44764, 1559.6116, 3.892530  
38005, 44312, 1559.5496, 3.892376  
38006, 44398, 1559.4877, 3.892221  
38007, 44516, 1559.4258, 3.892066  
38008, 44092, 1559.3638, 3.891911  
38009, 43192, 1559.3019, 3.891756  
38010, 42476, 1559.2400, 3.891602  
38011, 42436, 1559.1781, 3.891447  
38012, 42888, 1559.1161, 3.891292  
38013, 43270, 1559.0542, 3.891137  
38014, 43352, 1559.9923, 3.890983  
38015, 43490, 1559.9304, 3.890828  
38016, 44064, 1559.8684, 3.890673  
38017, 44872, 1559.8065, 3.890518  
38018, 45266, 1559.7446, 3.890364  
38019, 44860, 1559.6827, 3.890209  
38020, 44044, 1559.6207, 3.890054  
38021, 43582, 1559.5588, 3.889899  
38022, 43778, 1559.4969, 3.889745  
38023, 44188, 1559.4349, 3.889590  
38024, 44180, 1559.3730, 3.889435  
38025, 43698, 1559.3111, 3.889280  
38026, 43284, 1559.2492, 3.889126  
38027, 43382, 1559.1872, 3.888971  
38028, 43756, 1559.1253, 3.888816  
38029, 43792, 1559.0634, 3.888661  
38030, 43276, 1559.0015, 3.888507  
38031, 42732, 1559.9395, 3.888352  
38032, 42824, 1559.8776, 3.888197  
38033, 43526, 1559.8157, 3.888042  
38034, 44050, 1559.7537, 3.887888





38491, 31108, 1527.4532, 3.817163  
38492, 30498, 1527.3912, 3.817009  
38493, 30560, 1527.3293, 3.816854  
38494, 30832, 1527.2674, 3.816699  
38495, 30732, 1527.2054, 3.816544  
38496, 30188, 1527.1435, 3.816389  
38497, 29630, 1527.0816, 3.816235  
38498, 29340, 1527.0197, 3.816080  
38499, 29046, 1526.9577, 3.815925  
38500, 28336, 1526.8958, 3.815770  
38501, 27322, 1526.8339, 3.815616  
38502, 26712, 1526.7720, 3.815461  
38503, 27050, 1526.7100, 3.815306  
38504, 28022, 1526.6481, 3.815151  
38505, 28666, 1526.5862, 3.814997  
38506, 28408, 1526.5242, 3.814842  
38507, 27718, 1526.4623, 3.814687  
38508, 27666, 1526.4004, 3.814532  
38509, 28744, 1526.3385, 3.814378  
38510, 28316, 1526.2765, 3.814223  
38511, 31264, 1526.2146, 3.814068  
38512, 31140, 1526.1527, 3.813913  
38513, 30518, 1526.0908, 3.813759  
38514, 30256, 1526.0288, 3.813604  
38515, 30566, 1525.9669, 3.813449  
38516, 30916, 1525.9050, 3.813294  
38517, 30836, 1525.8431, 3.813140  
38518, 30552, 1525.7811, 3.812985  
38519, 30698, 1525.7192, 3.812830  
38520, 31458, 1525.6573, 3.812675  
38521, 32230, 1525.5953, 3.812521  
38522, 32274, 1525.5334, 3.812366  
38523, 31548, 1525.4715, 3.812211  
38524, 30782, 1525.4096, 3.812056  
38525, 30690, 1525.3476, 3.811902  
38526, 31160, 1525.2857, 3.811747  
38527, 31484, 1525.2238, 3.811592  
38528, 31184, 1525.1619, 3.811437  
38529, 30560, 1525.0999, 3.811282  
38530, 30262, 1525.0380, 3.811128  
38531, 30452, 1524.9761, 3.810973  
38532, 30630, 1524.9141, 3.810818  
38533, 30274, 1524.8522, 3.810663  
38534, 29552, 1524.7903, 3.810509  
38535, 29206, 1524.7284, 3.810354  
38536, 29692, 1524.6664, 3.810199  
38537, 30618, 1524.6045, 3.810044  
38538, 31120, 1524.5426, 3.809890  
38539, 30786, 1524.4807, 3.809735  
38540, 30058, 1524.4187, 3.809580  
38541, 29646, 1524.3568, 3.809425  
38542, 29742, 1524.2949, 3.809271  
38543, 29876, 1524.2330, 3.809116  
38544, 29628, 1524.1710, 3.808961  
38545, 29190, 1524.1091, 3.808806  
38546, 29152, 1524.0472, 3.808652  
38547, 29758, 1523.9852, 3.808497  
38548, 30516, 1523.9233, 3.808342  
38549, 30718, 1523.8614, 3.808187  
38550, 30236, 1523.7995, 3.808033  
38551, 29658, 1523.7375, 3.807878  
38552, 29594, 1523.6756, 3.807723  
38553, 30010, 1523.6137, 3.807568  
38554, 30334, 1523.5518, 3.807414  
38555, 30194, 1523.4898, 3.807259  
38556, 29894, 1523.4279, 3.807104  
38557, 30014, 1523.3660, 3.806949  
38558, 30662, 1523.3040, 3.806795  
38559, 31310, 1523.2421, 3.806640  
38560, 31388, 1523.1802, 3.806485  
38561, 30990, 1523.1183, 3.806330  
38562, 30746, 1523.0563, 3.806175  
38563, 31078, 1522.9944, 3.806021  
38564, 31674, 1522.9325, 3.805866  
38565, 31874, 1522.8706, 3.805711  
38566, 31482, 1522.8086, 3.805556  
38567, 31048, 1522.7467, 3.805402  
38568, 31218, 1522.6848, 3.805247  
38569, 31908, 1522.6229, 3.805092  
38570, 32318, 1522.5609, 3.804937  
38571, 31776, 1522.4990, 3.804783  
38572, 30494, 1522.4371, 3.804628  
38573, 29358, 1522.3751, 3.804473  
38574, 28990, 1522.3132, 3.804318  
38575, 29140, 1522.2513, 3.804164  
38576, 29064, 1522.1894, 3.804009  
38577, 28410, 1522.1274, 3.803854  
38578, 27562, 1522.0655, 3.803699  
38579, 27138, 1522.0036, 3.803545  
38580, 27246, 1521.9417, 3.803390  
38581, 27428, 1521.8797, 3.803235  
38582, 27278, 1521.8178, 3.803080  
38583, 26914, 1521.7559, 3.802926  
38584, 26776, 1521.6940, 3.802771  
38585, 26968, 1521.6320, 3.802616  
38586, 27082, 1521.5701, 3.802461  
38587, 26674, 1521.5082, 3.802307  
38588, 25874, 1521.4462, 3.802152  
38589, 25328, 1521.3843, 3.801997  
38590, 25522, 1521.3224, 3.801842  
38591, 26242, 1521.2605, 3.801688  
38592, 26822, 1521.1985, 3.801533  
38593, 26890, 1521.1366, 3.801378  
38594, 26692, 1521.0747, 3.801223  
38595, 26694, 1521.0128, 3.801068  
38596, 26946, 1520.9508, 3.800914  
38597, 27052, 1520.8889, 3.800759  
38598, 26746, 1520.8270, 3.800604  
38599, 26356, 1520.7650, 3.800449  
38600, 26520, 1520.7031, 3.800295  
38601, 27434, 1520.6412, 3.800140  
38602, 28576, 1520.5793, 3.799985  
38603, 29194, 1520.5173, 3.799830  
38604, 29090, 1520.4554, 3.799676  
38605, 28730, 1520.3935, 3.799521  
38606, 28592, 1520.3316, 3.799366  
38607, 28596, 1520.2696, 3.799211  
38608, 28262, 1520.2077, 3.799057  
38609, 27454, 1520.1458, 3.798902  
38610, 26702, 1520.0839, 3.798747  
38611, 26710, 1520.0219, 3.798592  
38612, 27510, 1519.9600, 3.798438  
38613, 28388, 1519.8981, 3.798283  
38614, 28654, 1519.8361, 3.798128  
38615, 28464, 1519.7742, 3.797973  
38616, 28648, 1519.7123, 3.797819  
38617, 29748, 1519.6504, 3.797664  
38618, 31318, 1519.5884, 3.797509  
38619, 32304, 1519.5265, 3.797354  
38620, 32118, 1519.4646, 3.797200  
38621, 31204, 1519.4027, 3.797045  
38622, 30508, 1519.3407, 3.796890  
38623, 30502, 1519.2788, 3.796735  
38624, 30814, 1519.2169, 3.796581  
38625, 30844, 1519.1549, 3.796426  
38626, 30480, 1519.0930, 3.796271  
38627, 30138, 1519.0311, 3.796116  
38628, 30074, 1518.9692, 3.795961  
38629, 29988, 1518.9072, 3.795807  
38630, 29368, 1518.8453, 3.795652  
38631, 28208, 1518.7834, 3.795497  
38632, 27130, 1518.7215, 3.795342  
38633, 26724, 1518.6595, 3.795188  
38634, 26866, 1518.5976, 3.795033  
38635, 26866, 1518.5357, 3.794878  
38636, 26322, 1518.4738, 3.794723  
38637, 25640, 1518.4118, 3.794569  
38638, 25598, 1518.3499, 3.794414  
38639, 26396, 1518.2880, 3.794259  
38640, 27318, 1518.2260, 3.794104  
38641, 27476, 1518.1641, 3.793950  
38642, 26728, 1518.1022, 3.793795  
38643, 25826, 1518.0403, 3.793640  
38644, 25568, 1517.9783, 3.793485  
38645, 25928, 1517.9164, 3.793331  
38646, 26186, 1517.8545, 3.793176  
38647, 25806, 1517.7926, 3.793021  
38648, 25076, 1517.7306, 3.792866  
38649, 24760, 1517.6687, 3.792712  
38650, 25208, 1517.6068, 3.792557  
38651, 26030, 1517.5448, 3.792402  
38652, 26608, 1517.4829, 3.792247  
38653, 26822, 1517.4210, 3.792093  
38654, 27110, 1517.3591, 3.791938  
38655, 27800, 1517.2971, 3.791783  
38656, 28608, 1517.2352, 3.791628  
38657, 28922, 1517.1733, 3.791473  
38658, 28552, 1517.1114, 3.791319  
38659, 27980, 1517.0494, 3.791164  
38660, 27822, 1516.9875, 3.791009  
38661, 28144, 1516.9256, 3.790854  
38662, 28424, 1516.8637, 3.790700  
38663, 28242, 1516.8017, 3.790545  
38664, 27804, 1516.7398, 3.790390  
38665, 27664, 1516.6779, 3.790235  
38666, 27956, 1516.6159, 3.790081  
38667, 28188, 1516.5540, 3.789926  
38668, 27836, 1516.4921, 3.789771  
38669, 27088, 1516.4302, 3.789616  
38670, 26798, 1516.3682, 3.789462  
38671, 27556, 1516.3063, 3.789307  
38672, 28940, 1516.2444, 3.789152  
38673, 29846, 1516.1825, 3.788997  
38674, 29596, 1516.1205, 3.788843  
38675, 28638, 1516.0586, 3.788688  
38676, 28052, 1515.9967, 3.788533  
38677, 28450, 1515.9347, 3.788378  
38678, 29430, 1515.8728, 3.788224  
38679, 30144, 1515.8109, 3.788069  
38680, 30224, 1515.7490, 3.787914  
38681, 30030, 1515.6870, 3.787759  
38682, 30032, 1515.6251, 3.787605  
38683, 30152, 1515.5632, 3.787450  
38684, 29906, 1515.5013, 3.787295  
38685, 29078, 1515.4393, 3.787140  
38686, 28086, 1515.3774, 3.786986  
38687, 27520, 1515.3155, 3.786831  
38688, 27462, 1515.2536, 3.786676  
38689, 27402, 1515.1916, 3.786521  
38690, 26900, 1515.1297, 3.786366  
38691, 26150, 1515.0678, 3.786212  
38692, 25758, 1515.0058, 3.786057  
38693, 25958, 1514.9439, 3.785902  
38694, 26284, 1514.8820, 3.785747  
38695, 26082, 1514.8201, 3.785593  
38696, 25362, 1514.7581, 3.785438  
38697, 24884, 1514.6962, 3.785283  
38698, 25374, 1514.6343, 3.785128  
38699, 26704, 1514.5724, 3.784974  
38700, 27974, 1514.5104, 3.784819  
38701, 28402, 1514.4485, 3.784664  
38702, 28026, 1514.3866, 3.784509  
38703, 27430, 1514.3246, 3.784355  
38704, 26974, 1514.2627, 3.784200  
38705, 26462, 1514.2008, 3.784045  
38706, 25628, 1514.1389, 3.783890  
38707, 24750, 1514.0769, 3.783736  
38708, 24530, 1514.0150, 3.783581  
38709, 25270, 1513.9531, 3.783426  
38710, 26390, 1513.8912, 3.783271  
38711, 26928, 1513.8292, 3.783117  
38712, 26556, 1513.7673, 3.782962  
38713, 25938, 1513.7054, 3.782807  
38714, 25964, 1513.6435, 3.782652  
38715, 26706, 1513.5815, 3.782498  
38716, 27324, 1513.5196, 3.782343  
38717, 27040, 1513.4577, 3.782188  
38718, 26058, 1513.3957, 3.782033

38719, 25392, 1513.3338, 3.781879  
38720, 25708, 1513.2719, 3.781724  
38721, 26560, 1513.2100, 3.781569  
38722, 26864, 1513.1480, 3.781414  
38723, 26118, 1513.0861, 3.781259  
38724, 24944, 1513.0242, 3.781105  
38725, 24400, 1512.9623, 3.780950  
38726, 24806, 1512.9003, 3.780795  
38727, 25500, 1512.8384, 3.780640  
38728, 25638, 1512.7765, 3.780486  
38729, 25214, 1512.7145, 3.780331  
38730, 24994, 1512.6526, 3.780176  
38731, 25612, 1512.5907, 3.780021  
38732, 26800, 1512.5288, 3.779867  
38733, 27698, 1512.4668, 3.779712  
38734, 27792, 1512.4049, 3.779557  
38735, 27384, 1512.3430, 3.779402  
38736, 27128, 1512.2811, 3.779248  
38737, 27236, 1512.2191, 3.779093  
38738, 27334, 1512.1572, 3.778938  
38739, 27066, 1512.0953, 3.778783  
38740, 26614, 1512.0334, 3.778629  
38741, 26480, 1511.9714, 3.778474  
38742, 26794, 1511.9095, 3.778319  
38743, 27102, 1511.8476, 3.778164  
38744, 26894, 1511.7856, 3.778010  
38745, 26300, 1511.7237, 3.777855  
38746, 26028, 1511.6618, 3.777700  
38747, 26540, 1511.5999, 3.777545  
38748, 27448, 1511.5379, 3.777391  
38749, 27858, 1511.4760, 3.777236  
38750, 27292, 1511.4141, 3.777081  
38751, 26226, 1511.3522, 3.776926  
38752, 25524, 1511.2902, 3.776772  
38753, 25522, 1511.2283, 3.776617  
38754, 25722, 1511.1664, 3.776462  
38755, 25480, 1511.1044, 3.776307  
38756, 24780, 1511.0425, 3.776152  
38757, 24238, 1510.9806, 3.775998  
38758, 24292, 1510.9187, 3.775843  
38759, 24662, 1510.8567, 3.775688  
38760, 24672, 1510.7948, 3.775533  
38761, 24094, 1510.7329, 3.775379  
38762, 23476, 1510.6710, 3.775224  
38763, 23514, 1510.6090, 3.775069  
38764, 24242, 1510.5471, 3.774914  
38765, 24974, 1510.4852, 3.774760  
38766, 25044, 1510.4233, 3.774605  
38767, 24546, 1510.3613, 3.774450  
38768, 24126, 1510.2994, 3.774295  
38769, 24136, 1510.2375, 3.774141  
38770, 24144, 1510.1755, 3.773986  
38771, 23422, 1510.1136, 3.773831  
38772, 21880, 1510.0517, 3.773676  
38773, 20336, 1509.9898, 3.773522  
38774, 19842, 1509.9278, 3.773367  
38775, 20734, 1509.8659, 3.773212  
38776, 22410, 1509.8040, 3.773057  
38777, 24050, 1509.7421, 3.772903  
38778, 25314, 1509.6801, 3.772748  
38779, 26424, 1509.6182, 3.772593  
38780, 27566, 1509.5563, 3.772438  
38781, 28482, 1509.4944, 3.772284  
38782, 28742, 1509.4324, 3.772129  
38783, 28254, 1509.3705, 3.771974  
38784, 27412, 1509.3086, 3.771819  
38785, 26746, 1509.2466, 3.771665  
38786, 26442, 1509.1847, 3.771510  
38787, 26390, 1509.1228, 3.771355  
38788, 26502, 1509.0609, 3.771200  
38789, 26856, 1508.9989, 3.771045  
38790, 27398, 1508.9370, 3.770891  
38791, 27718, 1508.8751, 3.770736  
38792, 27272, 1508.8132, 3.770581  
38793, 26008, 1508.7512, 3.770426  
38794, 24592, 1508.6893, 3.770272

38795, 23934, 1508.6274, 3.770117  
38796, 24336, 1508.5654, 3.769962  
38797, 25212, 1508.5035, 3.769807  
38798, 25684, 1508.4416, 3.769653  
38799, 25416, 1508.3797, 3.769498  
38800, 24878, 1508.3177, 3.769343  
38801, 24750, 1508.2558, 3.769188  
38802, 25238, 1508.1939, 3.769034  
38803, 25982, 1508.1320, 3.768879  
38804, 26572, 1508.0700, 3.768724  
38805, 26958, 1508.0081, 3.768569  
38806, 27266, 1507.9462, 3.768415  
38807, 27396, 1507.8843, 3.768260  
38808, 26972, 1507.8223, 3.768105  
38809, 25794, 1507.7604, 3.767950  
38810, 24244, 1507.6985, 3.767796  
38811, 23072, 1507.6365, 3.767641  
38812, 22756, 1507.5746, 3.767486  
38813, 23074, 1507.5127, 3.767331  
38814, 23446, 1507.4508, 3.767177  
38815, 23568, 1507.3888, 3.767022  
38816, 23606, 1507.3269, 3.766867  
38817, 23828, 1507.2650, 3.766712  
38818, 24138, 1507.2031, 3.766558  
38819, 24186, 1507.1411, 3.766403  
38820, 23916, 1507.0792, 3.766248  
38821, 23818, 1507.0173, 3.766093  
38822, 24450, 1506.9553, 3.765938  
38823, 25742, 1506.8934, 3.765784  
38824, 26888, 1506.8315, 3.765629  
38825, 27048, 1506.7696, 3.765474  
38826, 26158, 1506.7076, 3.765319  
38827, 24958, 1506.6457, 3.765165  
38828, 24224, 1506.5838, 3.765010  
38829, 24054, 1506.5219, 3.764855  
38830, 23996, 1506.4599, 3.764700  
38831, 23720, 1506.3980, 3.764546  
38832, 23422, 1506.3361, 3.764391  
38833, 23480, 1506.2742, 3.764236  
38834, 23830, 1506.2122, 3.764081  
38835, 23938, 1506.1503, 3.763927  
38836, 23422, 1506.0884, 3.763772  
38837, 22588, 1506.0264, 3.763617  
38838, 22172, 1505.9645, 3.763462  
38839, 22546, 1505.9026, 3.763308  
38840, 23260, 1505.8407, 3.763153  
38841, 23520, 1505.7787, 3.762998  
38842, 23088, 1505.7168, 3.762843  
38843, 22518, 1505.6549, 3.762689  
38844, 22504, 1505.5930, 3.762534  
38845, 23068, 1505.5310, 3.762379  
38846, 23504, 1505.4691, 3.762224  
38847, 23166, 1505.4072, 3.762070  
38848, 22190, 1505.3452, 3.761915  
38849, 21324, 1505.2833, 3.761760  
38850, 21090, 1505.2214, 3.761605  
38851, 21326, 1505.1595, 3.761451  
38852, 21472, 1505.0975, 3.761296  
38853, 21302, 1505.0356, 3.761141  
38854, 21142, 1504.9737, 3.760986  
38855, 21350, 1504.9118, 3.760831  
38856, 21842, 1504.8498, 3.760677  
38857, 22206, 1504.7879, 3.760522  
38858, 22298, 1504.7260, 3.760367  
38859, 22502, 1504.6641, 3.760212  
38860, 23230, 1504.6021, 3.760058  
38861, 24288, 1504.5402, 3.759903  
38862, 24918, 1504.4783, 3.759748  
38863, 24568, 1504.4163, 3.759593  
38864, 23590, 1504.3544, 3.759439  
38865, 22932, 1504.2925, 3.759284  
38866, 23146, 1504.2306, 3.759129  
38867, 23810, 1504.1686, 3.758974  
38868, 24010, 1504.1067, 3.758820  
38869, 23382, 1504.0448, 3.758665  
38870, 22522, 1503.9829, 3.758510

38871, 22286, 1503.9209, 3.758355  
38872, 22828, 1503.8590, 3.758201  
38873, 23456, 1503.7971, 3.758046  
38874, 23484, 1503.7351, 3.757891  
38875, 23046, 1503.6732, 3.757736  
38876, 22916, 1503.6113, 3.757582  
38877, 23564, 1503.5494, 3.757427  
38878, 24508, 1503.4874, 3.757272  
38879, 24842, 1503.4255, 3.757117  
38880, 24222, 1503.3636, 3.756963  
38881, 23304, 1503.3017, 3.756808  
38882, 23046, 1503.2397, 3.756653  
38883, 23722, 1503.1778, 3.756498  
38884, 24704, 1503.1159, 3.756344  
38885, 25236, 1503.0540, 3.756189  
38886, 25200, 1502.9920, 3.756034  
38887, 25082, 1502.9301, 3.755879  
38888, 25220, 1502.8682, 3.755724  
38889, 25346, 1502.8062, 3.755570  
38890, 24920, 1502.7443, 3.755415  
38891, 23838, 1502.6824, 3.755260  
38892, 22638, 1502.6205, 3.755105  
38893, 21948, 1502.5585, 3.754951  
38894, 21848, 1502.4966, 3.754796  
38895, 21918, 1502.4347, 3.754641  
38896, 21836, 1502.3728, 3.754486  
38897, 21750, 1502.3108, 3.754332  
38898, 21988, 1502.2489, 3.754177  
38899, 22494, 1502.1870, 3.754022  
38900, 22800, 1502.1250, 3.753867  
38901, 22570, 1502.0631, 3.753713  
38902, 22110, 1502.0012, 3.753558  
38903, 22084, 1501.9393, 3.753403  
38904, 22784, 1501.8773, 3.753248  
38905, 23726, 1501.8154, 3.753094  
38906, 24200, 1501.7535, 3.752939  
38907, 24064, 1501.6916, 3.752784  
38908, 23894, 1501.6296, 3.752629  
38909, 24262, 1501.5677, 3.752475  
38910, 25010, 1501.5058, 3.752320  
38911, 25364, 1501.4439, 3.752165  
38912, 24852, 1501.3819, 3.752010  
38913, 23896, 1501.3200, 3.751856  
38914, 23414, 1501.2581, 3.751701  
38915, 23776, 1501.1961, 3.751546  
38916, 24436, 1501.1342, 3.751391  
38917, 24566, 1501.0723, 3.751237  
38918, 24026, 1501.0104, 3.751082  
38919, 23528, 1500.9484, 3.750927  
38920, 23772, 1500.8865, 3.750772  
38921, 24600, 1500.8246, 3.750617  
38922, 25120, 1500.7627, 3.750463  
38923, 24724, 1500.7007, 3.750308  
38924, 23744, 1500.6388, 3.750153  
38925, 23088, 1500.5769, 3.749998  
38926, 23192, 1500.5149, 3.749844  
38927, 23592, 1500.4530, 3.749689  
38928, 23556, 1500.3911, 3.749534  
38929, 22982, 1500.3292, 3.749379  
38930, 22540, 1500.2672, 3.749225  
38931, 22836, 1500.2053, 3.749070  
38932, 23658, 1500.1434, 3.748915  
38933, 24170, 1500.0815, 3.748760  
38934, 23870, 1500.0195, 3.748606  
38935, 23184, 1499.9576, 3.748451  
38936, 22982, 1499.8957, 3.748296  
38937, 23636, 1499.8338, 3.748141  
38938, 24588, 1499.7718, 3.747987  
38939, 25022, 1499.7099, 3.747832  
38940, 24720, 1499.6480, 3.747677  
38941, 24208, 1499.5860, 3.747522  
38942, 24048, 1499.5241, 3.747368  
38943, 24178, 1499.4622, 3.747213  
38944, 24076, 1499.4003, 3.747058  
38945, 23480, 1499.3383, 3.746903  
38946, 22806, 1499.2764, 3.746749



38947, 22706, 1499.2145, 3.746594  
38948, 23254, 1499.1526, 3.746439  
38949, 23816, 1499.0906, 3.746284  
38950, 23648, 1499.0287, 3.746129  
38951, 22666, 1498.9668, 3.745975  
38952, 21516, 1498.9048, 3.745820  
38953, 20912, 1498.8429, 3.745665  
38954, 21042, 1498.7810, 3.745510  
38955, 21566, 1498.7191, 3.745356  
38956, 22110, 1498.6571, 3.745201  
38957, 22518, 1498.5952, 3.745046  
38958, 22746, 1498.5333, 3.744891  
38959, 22646, 1498.4714, 3.744737  
38960, 22074, 1498.4094, 3.744582  
38961, 21228, 1498.3475, 3.744427  
38962, 20650, 1498.2856, 3.744272  
38963, 20788, 1498.2237, 3.744118  
38964, 21520, 1498.1617, 3.743963  
38965, 22242, 1498.0998, 3.743808  
38966, 22508, 1498.0379, 3.743653  
38967, 22478, 1497.9759, 3.743499  
38968, 22664, 1497.9140, 3.743344  
38969, 23298, 1497.8521, 3.743189  
38970, 24042, 1497.7902, 3.743034  
38971, 24418, 1497.7282, 3.742880  
38972, 24450, 1497.6663, 3.742725  
38973, 24674, 1497.6044, 3.742570  
38974, 25492, 1497.5425, 3.742415  
38975, 26588, 1497.4805, 3.742261  
38976, 27166, 1497.4186, 3.742106  
38977, 26770, 1497.3567, 3.741951  
38978, 25806, 1497.2947, 3.741796  
38979, 25112, 1497.2328, 3.741642  
38980, 25090, 1497.1709, 3.741487  
38981, 25342, 1497.1090, 3.741332  
38982, 25202, 1497.0470, 3.741177  
38983, 24514, 1496.9851, 3.741022  
38984, 23752, 1496.9232, 3.740868  
38985, 23412, 1496.8613, 3.740713  
38986, 23450, 1496.7993, 3.740558  
38987, 23384, 1496.7374, 3.740403  
38988, 22966, 1496.6755, 3.740249  
38989, 22472, 1496.6136, 3.740094  
38990, 22328, 1496.5516, 3.739939  
38991, 22490, 1496.4897, 3.739784  
38992, 22462, 1496.4278, 3.739630  
38993, 21926, 1496.3658, 3.739475  
38994, 21228, 1496.3039, 3.739320  
38995, 21098, 1496.2420, 3.739165  
38996, 21816, 1496.1801, 3.739011  
38997, 22874, 1496.1181, 3.738856  
38998, 23492, 1496.0562, 3.738701  
38999, 23480, 1495.9943, 3.738546  
39000, 23376, 1495.9324, 3.738392  
39001, 23746, 1495.8704, 3.738237  
39002, 24412, 1495.8085, 3.738082  
39003, 24598, 1495.7466, 3.737927  
39004, 23850, 1495.6847, 3.737773  
39005, 22632, 1495.6227, 3.737618  
39006, 21924, 1495.5608, 3.737463  
39007, 22192, 1495.4989, 3.737308  
39008, 22938, 1495.4369, 3.737154  
39009, 23276, 1495.3750, 3.736999  
39010, 22926, 1495.3131, 3.736844  
39011, 22438, 1495.2512, 3.736689  
39012, 22456, 1495.1892, 3.736535  
39013, 22922, 1495.1273, 3.736380  
39014, 23162, 1495.0654, 3.736225  
39015, 22706, 1495.0035, 3.736070  
39016, 21888, 1494.9415, 3.735915  
39017, 21510, 1494.8796, 3.735761  
39018, 21992, 1494.8177, 3.735606  
39019, 22974, 1494.7557, 3.735451  
39020, 23812, 1494.6938, 3.735296  
39021, 24298, 1494.6319, 3.735142  
39022, 24756, 1494.5700, 3.734987  
39023, 25436, 1494.5080, 3.734832  
39024, 26056, 1494.4461, 3.734677  
39025, 26086, 1494.3842, 3.734523  
39026, 25426, 1494.3223, 3.734368  
39027, 24644, 1494.2603, 3.734213  
39028, 24388, 1494.1984, 3.734058  
39029, 24700, 1494.1365, 3.733904  
39030, 24986, 1494.0746, 3.733749  
39031, 24746, 1494.0126, 3.733594  
39032, 24166, 1493.9507, 3.733439  
39033, 23836, 1493.8888, 3.733285  
39034, 23996, 1493.8268, 3.733130  
39035, 24188, 1493.7649, 3.732975  
39036, 23788, 1493.7030, 3.732820  
39037, 22804, 1493.6411, 3.732666  
39038, 21910, 1493.5791, 3.732511  
39039, 21676, 1493.5172, 3.732356  
39040, 21884, 1493.4553, 3.732201  
39041, 21758, 1493.3934, 3.732047  
39042, 20904, 1493.3314, 3.731892  
39043, 19824, 1493.2695, 3.731737  
39044, 19390, 1493.2076, 3.731582  
39045, 19858, 1493.1456, 3.731428  
39046, 20580, 1493.0837, 3.731273  
39047, 20744, 1493.0218, 3.731118  
39048, 20290, 1492.9599, 3.730963  
39049, 19962, 1492.8979, 3.730808  
39050, 20370, 1492.8360, 3.730654  
39051, 21256, 1492.7741, 3.730499  
39052, 21748, 1492.7122, 3.730344  
39053, 21370, 1492.6502, 3.730189  
39054, 20576, 1492.5883, 3.730035  
39055, 20268, 1492.5264, 3.729880  
39056, 20806, 1492.4645, 3.729725  
39057, 21696, 1492.4025, 3.729570  
39058, 22266, 1492.3406, 3.729416  
39059, 22436, 1492.2787, 3.729261  
39060, 22684, 1492.2167, 3.729106  
39061, 23276, 1492.1548, 3.728951  
39062, 23784, 1492.0929, 3.728797  
39063, 23490, 1492.0310, 3.728642  
39064, 22302, 1491.9690, 3.728487  
39065, 20978, 1491.9071, 3.728332  
39066, 20430, 1491.8452, 3.728178  
39067, 20802, 1491.7833, 3.728023  
39068, 21420, 1491.7213, 3.727868  
39069, 21612, 1491.6594, 3.727713  
39070, 21470, 1491.5975, 3.727559  
39071, 21610, 1491.5355, 3.727404  
39072, 22344, 1491.4736, 3.727249  
39073, 23254, 1491.4117, 3.727094  
39074, 23698, 1491.3498, 3.726940  
39075, 23602, 1491.2878, 3.726785  
39076, 23526, 1491.2259, 3.726630  
39077, 23934, 1491.1640, 3.726475  
39078, 24514, 1491.1021, 3.726321  
39079, 24506, 1491.0401, 3.726166  
39080, 23630, 1490.9782, 3.726011  
39081, 22570, 1490.9163, 3.725856  
39082, 22306, 1490.8544, 3.725701  
39083, 23044, 1490.7924, 3.725547  
39084, 23912, 1490.7305, 3.725392  
39085, 23872, 1490.6686, 3.725237  
39086, 22794, 1490.6066, 3.725082  
39087, 21554, 1490.5447, 3.724928  
39088, 21048, 1490.4828, 3.724773  
39089, 21234, 1490.4209, 3.724618  
39090, 21310, 1490.3589, 3.724463  
39091, 20670, 1490.2970, 3.724309  
39092, 19572, 1490.2351, 3.724154  
39093, 18730, 1490.1732, 3.723999  
39094, 18434, 1490.1112, 3.723844  
39095, 18254, 1490.0493, 3.723690  
39096, 17668, 1489.9874, 3.723535  
39097, 16818, 1489.9254, 3.723380  
39098, 16402, 1489.8635, 3.723225  
39099, 16856, 1489.8016, 3.723071  
39100, 17796, 1489.7397, 3.722916  
39101, 18410, 1489.6777, 3.722761  
39102, 18366, 1489.6158, 3.722606  
39103, 18136, 1489.5539, 3.722452  
39104, 18378, 1489.4920, 3.722297  
39105, 19144, 1489.4300, 3.722142  
39106, 19834, 1489.3681, 3.721987  
39107, 19960, 1489.3062, 3.721833  
39108, 19758, 1489.2443, 3.721678  
39109, 19888, 1489.1823, 3.721523  
39110, 20568, 1489.1204, 3.721368  
39111, 21196, 1489.0585, 3.721214  
39112, 21014, 1488.9965, 3.721059  
39113, 19988, 1488.9346, 3.720904  
39114, 18954, 1488.8727, 3.720749  
39115, 18720, 1488.8108, 3.720594  
39116, 19216, 1488.7488, 3.720440  
39117, 19640, 1488.6869, 3.720285  
39118, 19432, 1488.6250, 3.720130  
39119, 18966, 1488.5631, 3.719975  
39120, 19128, 1488.5011, 3.719821  
39121, 20294, 1488.4392, 3.719666  
39122, 21834, 1488.3773, 3.719511  
39123, 22724, 1488.3153, 3.719356  
39124, 22546, 1488.2534, 3.719202  
39125, 21776, 1488.1915, 3.719047  
39126, 21120, 1488.1296, 3.718892  
39127, 20748, 1488.0676, 3.718737  
39128, 20266, 1488.0057, 3.718583  
39129, 19396, 1487.9438, 3.718428  
39130, 18452, 1487.8819, 3.718273  
39131, 18026, 1487.8199, 3.718118  
39132, 18328, 1487.7580, 3.717964  
39133, 18956, 1487.6961, 3.717809  
39134, 19390, 1487.6342, 3.717654  
39135, 19580, 1487.5722, 3.717499  
39136, 19896, 1487.5103, 3.717345  
39137, 20536, 1487.4484, 3.717190  
39138, 21160, 1487.3864, 3.717035  
39139, 21236, 1487.3245, 3.716880  
39140, 20664, 1487.2626, 3.716726  
39141, 19948, 1487.2007, 3.716571  
39142, 19642, 1487.1387, 3.716416  
39143, 19740, 1487.0768, 3.716261  
39144, 19752, 1487.0149, 3.716107  
39145, 19380, 1486.9530, 3.715952  
39146, 18966, 1486.8910, 3.715797  
39147, 19116, 1486.8291, 3.715642  
39148, 19970, 1486.7672, 3.715487  
39149, 20948, 1486.7052, 3.715333  
39150, 21288, 1486.6433, 3.715178  
39151, 20856, 1486.5814, 3.715023  
39152, 20226, 1486.5195, 3.714868  
39153, 20032, 1486.4575, 3.714714  
39154, 20300, 1486.3956, 3.714559  
39155, 20510, 1486.3337, 3.714404  
39156, 20272, 1486.2718, 3.714249  
39157, 19724, 1486.2098, 3.714095  
39158, 19306, 1486.1479, 3.713940  
39159, 19202, 1486.0860, 3.713785  
39160, 19176, 1486.0241, 3.713630  
39161, 18958, 1485.9621, 3.713476  
39162, 18646, 1485.9002, 3.713321  
39163, 18584, 1485.8383, 3.713166  
39164, 18826, 1485.7763, 3.713011  
39165, 18988, 1485.7144, 3.712857  
39166, 18676, 1485.6525, 3.712702  
39167, 18022, 1485.5906, 3.712547  
39168, 17606, 1485.5286, 3.712392  
39169, 17836, 1485.4667, 3.712238  
39170, 18408, 1485.4048, 3.712083  
39171, 18634, 1485.3429, 3.711928  
39172, 18196, 1485.2809, 3.711773  
39173, 17544, 1485.2190, 3.711619  
39174, 17370, 1485.1571, 3.711464

39175, 17812, 1485.0951, 3.711309  
39176, 18280, 1485.0332, 3.711154  
39177, 18178, 1484.9713, 3.711000  
39178, 17640, 1484.9094, 3.710845  
39179, 17460, 1484.8474, 3.710690  
39180, 18186, 1484.7855, 3.710535  
39181, 19492, 1484.7236, 3.710380  
39182, 20466, 1484.6617, 3.710226  
39183, 20602, 1484.5997, 3.710071  
39184, 20260, 1484.5378, 3.709916  
39185, 20228, 1484.4759, 3.709761  
39186, 20804, 1484.4140, 3.709607  
39187, 21540, 1484.3520, 3.709452  
39188, 21828, 1484.2901, 3.709297  
39189, 21590, 1484.2282, 3.709142  
39190, 21268, 1484.1662, 3.708988  
39191, 21174, 1484.1043, 3.708833  
39192, 21064, 1484.0424, 3.708678  
39193, 20474, 1483.9805, 3.708523  
39194, 19428, 1483.9185, 3.708369  
39195, 18548, 1483.8566, 3.708214  
39196, 18412, 1483.7947, 3.708059  
39197, 18880, 1483.7328, 3.707904  
39198, 19196, 1483.6708, 3.707750  
39199, 18808, 1483.6089, 3.707595  
39200, 17972, 1483.5470, 3.707440  
39201, 17448, 1483.4850, 3.707285  
39202, 17636, 1483.4231, 3.707131  
39203, 18164, 1483.3612, 3.706976  
39204, 18382, 1483.2993, 3.706821  
39205, 18152, 1483.2373, 3.706666  
39206, 17976, 1483.1754, 3.706512  
39207, 18344, 1483.1135, 3.706357  
39208, 19134, 1483.0516, 3.706202  
39209, 19776, 1482.9896, 3.706047  
39210, 19984, 1482.9277, 3.705893  
39211, 20138, 1482.8658, 3.705738  
39212, 20782, 1482.8039, 3.705583  
39213, 21866, 1482.7419, 3.705428  
39214, 22628, 1482.6800, 3.705273  
39215, 22390, 1482.6181, 3.705119  
39216, 21316, 1482.5561, 3.704964  
39217, 20318, 1482.4942, 3.704809  
39218, 20078, 1482.4323, 3.704654  
39219, 20366, 1482.3704, 3.704500  
39220, 20386, 1482.3084, 3.704345  
39221, 19728, 1482.2465, 3.704190  
39222, 18878, 1482.1846, 3.704035  
39223, 18694, 1482.1227, 3.703881  
39224, 19436, 1482.0607, 3.703726  
39225, 20498, 1481.9988, 3.703571  
39226, 21052, 1481.9369, 3.703416  
39227, 20862, 1481.8750, 3.703262  
39228, 20384, 1481.8130, 3.703107  
39229, 20116, 1481.7511, 3.702952  
39230, 20054, 1481.6892, 3.702797  
39231, 19870, 1481.6272, 3.702643  
39232, 19460, 1481.5653, 3.702488  
39233, 19174, 1481.5034, 3.702333  
39234, 19386, 1481.4415, 3.702178  
39235, 19992, 1481.3795, 3.702024  
39236, 20510, 1481.3176, 3.701869  
39237, 20686, 1481.2557, 3.701714  
39238, 20796, 1481.1938, 3.701559  
39239, 21262, 1481.1318, 3.701405  
39240, 22034, 1481.0699, 3.701250  
39241, 22468, 1481.0080, 3.701095  
39242, 22032, 1480.9460, 3.700940  
39243, 20954, 1480.8841, 3.700785  
39244, 20048, 1480.8222, 3.700631  
39245, 19878, 1480.7603, 3.700476  
39246, 20142, 1480.6983, 3.700321  
39247, 20050, 1480.6364, 3.700166  
39248, 19258, 1480.5745, 3.700012  
39249, 18332, 1480.5126, 3.699857  
39250, 18142, 1480.4506, 3.699702  
39251, 18890, 1480.3887, 3.699547  
39252, 19874, 1480.3268, 3.699393  
39253, 20196, 1480.2649, 3.699238  
39254, 19674, 1480.2029, 3.699083  
39255, 18948, 1480.1410, 3.698928  
39256, 18698, 1480.0791, 3.698774  
39257, 18950, 1480.0171, 3.698619  
39258, 19184, 1479.9552, 3.698464  
39259, 18996, 1479.8933, 3.698309  
39260, 18576, 1479.8314, 3.698155  
39261, 18364, 1479.7694, 3.698000  
39262, 18502, 1479.7075, 3.697845  
39263, 18674, 1479.6456, 3.697690  
39264, 18592, 1479.5837, 3.697536  
39265, 18400, 1479.5217, 3.697381  
39266, 18530, 1479.4598, 3.697226  
39267, 19114, 1479.3979, 3.697071  
39268, 19750, 1479.3359, 3.696917  
39269, 19928, 1479.2740, 3.696762  
39270, 19622, 1479.2121, 3.696607  
39271, 19354, 1479.1502, 3.696452  
39272, 19618, 1479.0882, 3.696298  
39273, 20352, 1479.0263, 3.696143  
39274, 21026, 1478.9644, 3.695988  
39275, 21238, 1478.9025, 3.695833  
39276, 21058, 1478.8405, 3.695678  
39277, 20800, 1478.7786, 3.695524  
39278, 20512, 1478.7167, 3.695369  
39279, 19912, 1478.6548, 3.695214  
39280, 18844, 1478.5928, 3.695059  
39281, 17662, 1478.5309, 3.694905  
39282, 17006, 1478.4690, 3.694750  
39283, 17162, 1478.4070, 3.694595  
39284, 17772, 1478.3451, 3.694440  
39285, 18280, 1478.2832, 3.694286  
39286, 18524, 1478.2213, 3.694131  
39287, 18862, 1478.1593, 3.693976  
39288, 19594, 1478.0974, 3.693821  
39289, 20422, 1478.0355, 3.693667  
39290, 20686, 1477.9736, 3.693512  
39291, 20060, 1477.9116, 3.693357  
39292, 18990, 1477.8497, 3.693202  
39293, 18250, 1477.7878, 3.693048  
39294, 18130, 1477.7258, 3.692893  
39295, 18218, 1477.6639, 3.692738  
39296, 17988, 1477.6020, 3.692583  
39297, 17492, 1477.5401, 3.692429  
39298, 17342, 1477.4781, 3.692274  
39299, 17952, 1477.4162, 3.692119  
39300, 18954, 1477.3543, 3.691964  
39301, 19538, 1477.2924, 3.691810  
39302, 19322, 1477.2304, 3.691655  
39303, 18780, 1477.1685, 3.691500  
39304, 18692, 1477.1066, 3.691345  
39305, 19258, 1477.0447, 3.691191  
39306, 19874, 1476.9827, 3.691036  
39307, 19860, 1476.9208, 3.690881  
39308, 19248, 1476.8589, 3.690726  
39309, 18736, 1476.7969, 3.690571  
39310, 18884, 1476.7350, 3.690417  
39311, 19452, 1476.6731, 3.690262  
39312, 19716, 1476.6112, 3.690107  
39313, 19318, 1476.5492, 3.689952  
39314, 18706, 1476.4873, 3.689798  
39315, 18608, 1476.4254, 3.689643  
39316, 19230, 1476.3635, 3.689488  
39317, 20058, 1476.3015, 3.689333  
39318, 20470, 1476.2396, 3.689179  
39319, 20418, 1476.1777, 3.689024  
39320, 20362, 1476.1157, 3.688869  
39321, 20620, 1476.0538, 3.688714  
39322, 20944, 1475.9919, 3.688560  
39323, 20812, 1475.9300, 3.688405  
39324, 20116, 1475.8680, 3.688250  
39325, 19290, 1475.8061, 3.688095  
39326, 18830, 1475.7442, 3.687941  
39327, 18726, 1475.6823, 3.687786  
39328, 18544, 1475.6203, 3.687631  
39329, 18024, 1475.5584, 3.687476  
39330, 17474, 1475.4965, 3.687322  
39331, 17392, 1475.4346, 3.687167  
39332, 17862, 1475.3726, 3.687012  
39333, 18376, 1475.3107, 3.686857  
39334, 18438, 1475.2488, 3.686703  
39335, 18134, 1475.1868, 3.686548  
39336, 18044, 1475.1249, 3.686393  
39337, 18536, 1475.0630, 3.686238  
39338, 19292, 1475.0011, 3.686084  
39339, 19640, 1474.9391, 3.685929  
39340, 19320, 1474.8772, 3.685774  
39341, 18736, 1474.8153, 3.685619  
39342, 18486, 1474.7534, 3.685464  
39343, 18638, 1474.6914, 3.685310  
39344, 18746, 1474.6295, 3.685155  
39345, 18478, 1474.5676, 3.685000  
39346, 18124, 1474.5056, 3.684845  
39347, 18256, 1474.4437, 3.684691  
39348, 18974, 1474.3818, 3.684536  
39349, 19622, 1474.3199, 3.684381  
39350, 19474, 1474.2579, 3.684226  
39351, 18566, 1474.1960, 3.684072  
39352, 17780, 1474.1341, 3.683917  
39353, 17916, 1474.0722, 3.683762  
39354, 18822, 1474.0102, 3.683607  
39355, 19530, 1473.9483, 3.683453  
39356, 19240, 1473.8864, 3.683298  
39357, 18126, 1473.8245, 3.683143  
39358, 17032, 1473.7625, 3.682988  
39359, 16552, 1473.7006, 3.682834  
39360, 16512, 1473.6387, 3.682679  
39361, 16418, 1473.5767, 3.682524  
39362, 16216, 1473.5148, 3.682369  
39363, 16432, 1473.4529, 3.682215  
39364, 17466, 1473.3910, 3.682060  
39365, 18970, 1473.3290, 3.681905  
39366, 20084, 1473.2671, 3.681750  
39367, 20296, 1473.2052, 3.681596  
39368, 19972, 1473.1433, 3.681441  
39369, 19892, 1473.0813, 3.681286  
39370, 20362, 1473.0194, 3.681131  
39371, 20922, 1472.9575, 3.680977  
39372, 20972, 1472.8955, 3.680822  
39373, 20514, 1472.8336, 3.680667  
39374, 20172, 1472.7717, 3.680512  
39375, 20428, 1472.7098, 3.680357  
39376, 21016, 1472.6478, 3.680203  
39377, 21224, 1472.5859, 3.680048  
39378, 20726, 1472.5240, 3.679893  
39379, 19990, 1472.4621, 3.679738  
39380, 19816, 1472.4001, 3.679584  
39381, 20496, 1472.3382, 3.679429  
39382, 21590, 1472.2763, 3.679274  
39383, 22488, 1472.2144, 3.679119  
39384, 23006, 1472.1524, 3.678965  
39385, 23354, 1472.0905, 3.678810  
39386, 23574, 1472.0286, 3.678655  
39387, 23294, 1471.9666, 3.678500  
39388, 22144, 1471.9047, 3.678346  
39389, 20402, 1471.8428, 3.678191  
39390, 18974, 1471.7809, 3.678036  
39391, 18620, 1471.7189, 3.677881  
39392, 19270, 1471.6570, 3.677727  
39393, 20148, 1471.5951, 3.677572  
39394, 20620, 1471.5332, 3.677417  
39395, 20772, 1471.4712, 3.677262  
39396, 21106, 1471.4093, 3.677108  
39397, 21762, 1471.3474, 3.676953  
39398, 22244, 1471.2854, 3.676798  
39399, 21974, 1471.2235, 3.676643  
39400, 21014, 1471.1616, 3.676489  
39401, 20080, 1471.0997, 3.676334  
39402, 19836, 1471.0377, 3.676179

39403, 20238, 1470.9758, 3.676024  
39404, 20690, 1470.9139, 3.675870  
39405, 20790, 1470.8520, 3.675715  
39406, 20720, 1470.7900, 3.675560  
39407, 20898, 1470.7281, 3.675405  
39408, 21342, 1470.6662, 3.675250  
39409, 21558, 1470.6043, 3.675096  
39410, 21154, 1470.5423, 3.674941  
39411, 20362, 1470.4804, 3.674786  
39412, 19860, 1470.4185, 3.674631  
39413, 20032, 1470.3565, 3.674477  
39414, 20538, 1470.2946, 3.674322  
39415, 20720, 1470.2327, 3.674167  
39416, 20350, 1470.1708, 3.674012  
39417, 19854, 1470.1088, 3.673858  
39418, 19746, 1470.0469, 3.673703  
39419, 19994, 1469.9850, 3.673548  
39420, 20058, 1469.9231, 3.673393  
39421, 19592, 1469.8611, 3.673239  
39422, 18924, 1469.7992, 3.673084  
39423, 18704, 1469.7373, 3.672929  
39424, 19164, 1469.6754, 3.672774  
39425, 19786, 1469.6134, 3.672620  
39426, 19866, 1469.5515, 3.672465  
39427, 19268, 1469.4896, 3.672310  
39428, 18504, 1469.4276, 3.672155  
39429, 18116, 1469.3657, 3.672001  
39430, 18052, 1469.3038, 3.671846  
39431, 17800, 1469.2419, 3.671691  
39432, 17094, 1469.1799, 3.671536  
39433, 16268, 1469.1180, 3.671382  
39434, 15842, 1469.0561, 3.671227  
39435, 15868, 1469.9942, 3.671072  
39436, 15792, 1468.9322, 3.670917  
39437, 15160, 1468.8703, 3.670763  
39438, 14212, 1468.8084, 3.670608  
39439, 13708, 1468.7464, 3.670453  
39440, 14108, 1468.6845, 3.670298  
39441, 15026, 1468.6226, 3.670143  
39442, 15642, 1468.5607, 3.669989  
39443, 15544, 1468.4987, 3.669834  
39444, 15140, 1468.4368, 3.669679  
39445, 15112, 1468.3749, 3.669524  
39446, 15620, 1468.3130, 3.669370  
39447, 16144, 1468.2510, 3.669215  
39448, 16140, 1468.1891, 3.669060  
39449, 15684, 1468.1272, 3.668905  
39450, 15372, 1468.0653, 3.668751  
39451, 15624, 1468.0033, 3.668596  
39452, 16216, 1467.9414, 3.668441  
39453, 16576, 1467.8795, 3.668286  
39454, 16470, 1467.8175, 3.668132  
39455, 16242, 1467.7556, 3.667977  
39456, 16364, 1467.6937, 3.667822  
39457, 16884, 1467.6318, 3.667667  
39458, 17420, 1467.5698, 3.667513  
39459, 17664, 1467.5079, 3.667358  
39460, 17758, 1467.4460, 3.667203  
39461, 18018, 1467.3841, 3.667048  
39462, 18464, 1467.3221, 3.666894  
39463, 18684, 1467.2602, 3.666739  
39464, 18330, 1467.1983, 3.666584  
39465, 17566, 1467.1363, 3.666429  
39466, 16968, 1467.0744, 3.666275  
39467, 16900, 1467.0125, 3.666120  
39468, 17146, 1466.9506, 3.665965  
39469, 17202, 1466.8886, 3.665810  
39470, 16938, 1466.8267, 3.665656  
39471, 16718, 1466.7648, 3.665501  
39472, 16936, 1466.7029, 3.665346  
39473, 17442, 1466.6409, 3.665191  
39474, 17672, 1466.5790, 3.665036  
39475, 17282, 1466.5171, 3.664882  
39476, 16620, 1466.4552, 3.664727  
39477, 16368, 1466.3932, 3.664572  
39478, 16788, 1466.3313, 3.664417  
39479, 17470, 1466.2694, 3.664263  
39480, 17842, 1466.2074, 3.664108  
39481, 17866, 1466.1455, 3.663953  
39482, 18058, 1466.0836, 3.663798  
39483, 18808, 1466.0217, 3.663644  
39484, 19774, 1465.9597, 3.663489  
39485, 20158, 1465.8978, 3.663334  
39486, 19540, 1465.8359, 3.663179  
39487, 18380, 1465.7740, 3.663025  
39488, 17564, 1465.7120, 3.662870  
39489, 17526, 1465.6501, 3.662715  
39490, 17912, 1465.5882, 3.662560  
39491, 18122, 1465.5262, 3.662406  
39492, 18062, 1465.4643, 3.662251  
39493, 18158, 1465.4024, 3.662096  
39494, 18762, 1465.3405, 3.661941  
39495, 19598, 1465.2785, 3.661787  
39496, 20022, 1465.2166, 3.661632  
39497, 19766, 1465.1547, 3.661477  
39498, 19232, 1465.0928, 3.661322  
39499, 19022, 1465.0308, 3.661168  
39500, 19226, 1464.9689, 3.661013  
39501, 19352, 1464.9070, 3.660858  
39502, 18950, 1464.8451, 3.660703  
39503, 18184, 1464.7831, 3.660549  
39504, 17672, 1464.7212, 3.660394  
39505, 17734, 1464.6593, 3.660239  
39506, 18032, 1464.5973, 3.660084  
39507, 18008, 1464.5354, 3.659929  
39508, 17594, 1464.4735, 3.659775  
39509, 17340, 1464.4116, 3.659620  
39510, 17752, 1464.3496, 3.659465  
39511, 18626, 1464.2877, 3.659310  
39512, 19196, 1464.2258, 3.659156  
39513, 18950, 1464.1639, 3.659001  
39514, 18222, 1464.1019, 3.658846  
39515, 17814, 1464.0400, 3.658691  
39516, 18120, 1463.9781, 3.658537  
39517, 18732, 1463.9161, 3.658382  
39518, 18942, 1463.8542, 3.658227  
39519, 18576, 1463.7923, 3.658072  
39520, 18136, 1463.7304, 3.657918  
39521, 18170, 1463.6684, 3.657763  
39522, 18624, 1463.6065, 3.657608  
39523, 18928, 1463.5446, 3.657453  
39524, 18698, 1463.4827, 3.657299  
39525, 18162, 1463.4207, 3.657144  
39526, 17854, 1463.3588, 3.656989  
39527, 17932, 1463.2969, 3.656834  
39528, 18028, 1463.2350, 3.656680  
39529, 17732, 1463.1730, 3.656525  
39530, 17160, 1463.1111, 3.656370  
39531, 16812, 1463.0492, 3.656215  
39532, 16938, 1462.9872, 3.656061  
39533, 17182, 1462.9253, 3.655906  
39534, 16962, 1462.8634, 3.655751  
39535, 16210, 1462.8015, 3.655596  
39536, 15512, 1462.7395, 3.655441  
39537, 15494, 1462.6776, 3.655287  
39538, 16094, 1462.6157, 3.655132  
39539, 16630, 1462.5538, 3.654977  
39540, 16532, 1462.4918, 3.654822  
39541, 15972, 1462.4299, 3.654668  
39542, 15604, 1462.3680, 3.654513  
39543, 15810, 1462.3060, 3.654358  
39544, 16292, 1462.2441, 3.654203  
39545, 16548, 1462.1822, 3.654049  
39546, 16508, 1462.1203, 3.653894  
39547, 16632, 1462.0583, 3.653739  
39548, 17268, 1461.9964, 3.653584  
39549, 18104, 1461.9345, 3.653430  
39550, 18426, 1461.8726, 3.653275  
39551, 17922, 1461.8106, 3.653120  
39552, 17074, 1461.7487, 3.652965  
39553, 16676, 1461.6868, 3.652811  
39554, 16974, 1461.6249, 3.652656  
39555, 17452, 1461.5629, 3.652501  
39556, 17486, 1461.5010, 3.652346  
39557, 17102, 1461.4391, 3.652192  
39558, 16898, 1461.3771, 3.652037  
39559, 17284, 1461.3152, 3.651882  
39560, 17858, 1461.2533, 3.651727  
39561, 17792, 1461.1914, 3.651573  
39562, 16744, 1461.1294, 3.651418  
39563, 15280, 1461.0675, 3.651263  
39564, 14322, 1461.0056, 3.651108  
39565, 14222, 1460.9437, 3.650954  
39566, 14488, 1460.8817, 3.650799  
39567, 14484, 1460.8198, 3.650644  
39568, 14176, 1460.7579, 3.650489  
39569, 14148, 1460.6959, 3.650334  
39570, 14874, 1460.6340, 3.650180  
39571, 16112, 1460.5721, 3.650025  
39572, 17148, 1460.5102, 3.649870  
39573, 17518, 1460.4482, 3.649715  
39574, 17402, 1460.3863, 3.649561  
39575, 17272, 1460.3244, 3.649406  
39576, 17294, 1460.2625, 3.649251  
39577, 17254, 1460.2005, 3.649096  
39578, 17014, 1460.1386, 3.648942  
39579, 16856, 1460.0767, 3.648787  
39580, 17250, 1460.0148, 3.648632  
39581, 18236, 1459.9528, 3.648477  
39582, 19260, 1459.8909, 3.648323  
39583, 19690, 1459.8290, 3.648168  
39584, 19466, 1459.7670, 3.648013  
39585, 19090, 1459.7051, 3.647858  
39586, 19000, 1459.6432, 3.647704  
39587, 19058, 1459.5813, 3.647549  
39588, 18780, 1459.5193, 3.647394  
39589, 18022, 1459.4574, 3.647239  
39590, 17298, 1459.3955, 3.647085  
39591, 17262, 1459.3336, 3.646930  
39592, 17956, 1459.2716, 3.646775  
39593, 18656, 1459.2097, 3.646620  
39594, 18566, 1459.1478, 3.646466  
39595, 17602, 1459.0858, 3.646311  
39596, 16422, 1459.0239, 3.646156  
39597, 15726, 1458.9620, 3.646001  
39598, 15620, 1458.9001, 3.645847  
39599, 15714, 1458.8381, 3.645692  
39600, 15708, 1458.7762, 3.645537  
39601, 15752, 1458.7143, 3.645382  
39602, 16138, 1458.6524, 3.645227  
39603, 16816, 1458.5904, 3.645073  
39604, 17358, 1458.5285, 3.644918  
39605, 17400, 1458.4666, 3.644763  
39606, 17038, 1458.4047, 3.644608  
39607, 16666, 1458.3427, 3.644454  
39608, 16492, 1458.2808, 3.644299  
39609, 16328, 1458.2189, 3.644144  
39610, 15904, 1458.1569, 3.643989  
39611, 15280, 1458.0950, 3.643835  
39612, 14800, 1458.0331, 3.643680  
39613, 14650, 1457.9712, 3.643525  
39614, 14596, 1457.9092, 3.643370  
39615, 14312, 1457.8473, 3.643216  
39616, 13894, 1457.7854, 3.643061  
39617, 13884, 1457.7235, 3.642906  
39618, 14694, 1457.6615, 3.642751  
39619, 16046, 1457.5996, 3.642597  
39620, 17130, 1457.5377, 3.642442  
39621, 17416, 1457.4757, 3.642287  
39622, 17190, 1457.4138, 3.642132  
39623, 17198, 1457.3519, 3.641978  
39624, 17800, 1457.2900, 3.641823  
39625, 18576, 1457.2280, 3.641668  
39626, 18826, 1457.1661, 3.641513  
39627, 18382, 1457.1042, 3.641359  
39628, 17778, 1457.0423, 3.641204  
39629, 17590, 1456.9803, 3.641049  
39630, 17760, 1456.9184, 3.640894

39631, 17702, 1456.8565, 3.640740  
39632, 17068, 1456.7946, 3.640585  
39633, 16244, 1456.7326, 3.640430  
39634, 15920, 1456.6707, 3.640275  
39635, 16282, 1456.6088, 3.640120  
39636, 16734, 1456.5468, 3.639966  
39637, 16578, 1456.4849, 3.639811  
39638, 15846, 1456.4230, 3.639656  
39639, 15320, 1456.3611, 3.639501  
39640, 15688, 1456.2991, 3.639347  
39641, 16806, 1456.2372, 3.639192  
39642, 17840, 1456.1753, 3.639037  
39643, 18172, 1456.1134, 3.638882  
39644, 17928, 1456.0514, 3.638728  
39645, 17676, 1455.9895, 3.638573  
39646, 17644, 1455.9276, 3.638418  
39647, 17530, 1455.8657, 3.638263  
39648, 17056, 1455.8037, 3.638109  
39649, 16516, 1455.7418, 3.637954  
39650, 16584, 1455.6799, 3.637799  
39651, 17498, 1455.6179, 3.637644  
39652, 18638, 1455.5560, 3.637490  
39653, 19088, 1455.4941, 3.637335  
39654, 18608, 1455.4322, 3.637180  
39655, 17918, 1455.3702, 3.637025  
39656, 17894, 1455.3083, 3.636871  
39657, 18588, 1455.2464, 3.636716  
39658, 19156, 1455.1845, 3.636561  
39659, 18796, 1455.1225, 3.636406  
39660, 17680, 1455.0606, 3.636252  
39661, 16750, 1454.9987, 3.636097  
39662, 16698, 1454.9367, 3.635942  
39663, 17230, 1454.8748, 3.635787  
39664, 17444, 1454.8129, 3.635633  
39665, 16854, 1454.7510, 3.635478  
39666, 15916, 1454.6890, 3.635323  
39667, 15500, 1454.6271, 3.635168  
39668, 15966, 1454.5652, 3.635013  
39669, 16888, 1454.5033, 3.634859  
39670, 17618, 1454.4413, 3.634704  
39671, 17946, 1454.3794, 3.634549  
39672, 18094, 1454.3175, 3.634394  
39673, 18166, 1454.2556, 3.634240  
39674, 17878, 1454.1936, 3.634085  
39675, 16932, 1454.1317, 3.633930  
39676, 15564, 1454.0698, 3.633775  
39677, 14516, 1454.0078, 3.633621  
39678, 14324, 1453.9459, 3.633466  
39679, 14756, 1453.8840, 3.633311  
39680, 15112, 1453.8221, 3.633156  
39681, 15012, 1453.7601, 3.633002  
39682, 14842, 1453.6982, 3.632847  
39683, 15248, 1453.6363, 3.632692  
39684, 16338, 1453.5744, 3.632537  
39685, 17446, 1453.5124, 3.632383  
39686, 17836, 1453.4505, 3.632228  
39687, 17440, 1453.3886, 3.632073  
39688, 16906, 1453.3266, 3.631918  
39689, 16800, 1453.2647, 3.631764  
39690, 17012, 1453.2028, 3.631609  
39691, 16954, 1453.1409, 3.631454  
39692, 16324, 1453.0789, 3.631299  
39693, 15464, 1453.0170, 3.631145  
39694, 14910, 1452.9551, 3.630990  
39695, 14720, 1452.8932, 3.630835  
39696, 14404, 1452.8312, 3.630680  
39697, 13592, 1452.7693, 3.630526  
39698, 12592, 1452.7074, 3.630371  
39699, 12196, 1452.6455, 3.630216  
39700, 12842, 1452.5835, 3.630061  
39701, 14142, 1452.5216, 3.629906  
39702, 15242, 1452.4597, 3.629752  
39703, 15634, 1452.3977, 3.629597  
39704, 15532, 1452.3358, 3.629442  
39705, 15416, 1452.2739, 3.629287  
39706, 15430, 1452.2120, 3.629133  
39707, 15296, 1452.1500, 3.628978  
39708, 14828, 1452.0881, 3.628823  
39709, 14306, 1452.0262, 3.628668  
39710, 14228, 1451.9643, 3.628514  
39711, 14698, 1451.9023, 3.628359  
39712, 15278, 1451.8404, 3.628204  
39713, 15432, 1451.7785, 3.628049  
39714, 15146, 1451.7165, 3.627895  
39715, 14904, 1451.6546, 3.627740  
39716, 15128, 1451.5927, 3.627585  
39717, 15686, 1451.5308, 3.627430  
39718, 16118, 1451.4688, 3.627276  
39719, 16226, 1451.4069, 3.627121  
39720, 16318, 1451.3450, 3.626966  
39721, 16784, 1451.2831, 3.626811  
39722, 17548, 1451.2211, 3.626657  
39723, 18020, 1451.1592, 3.626502  
39724, 17742, 1451.0973, 3.626347  
39725, 16886, 1451.0354, 3.626192  
39726, 16078, 1450.9734, 3.626038  
39727, 15720, 1450.9115, 3.625883  
39728, 15608, 1450.8496, 3.625728  
39729, 15284, 1450.7876, 3.625573  
39730, 14628, 1450.7257, 3.625419  
39731, 14016, 1450.6638, 3.625264  
39732, 13846, 1450.6019, 3.625109  
39733, 14042, 1450.5399, 3.624954  
39734, 14154, 1450.4780, 3.624799  
39735, 13944, 1450.4161, 3.624645  
39736, 13692, 1450.3542, 3.624490  
39737, 13864, 1450.2922, 3.624335  
39738, 14504, 1450.2303, 3.624180  
39739, 15144, 1450.1684, 3.624026  
39740, 15356, 1450.1064, 3.623871  
39741, 15274, 1450.0445, 3.623716  
39742, 15486, 1449.9826, 3.623561  
39743, 16348, 1449.9207, 3.623407  
39744, 17532, 1449.8587, 3.623252  
39745, 18384, 1449.7968, 3.623097  
39746, 18630, 1449.7349, 3.622942  
39747, 18588, 1449.6730, 3.622788  
39748, 18740, 1449.6110, 3.622633  
39749, 19054, 1449.5491, 3.622478  
39750, 19042, 1449.4872, 3.622323  
39751, 18364, 1449.4253, 3.622169  
39752, 17290, 1449.3633, 3.622014  
39753, 16412, 1449.3014, 3.621859  
39754, 15944, 1449.2395, 3.621704  
39755, 15492, 1449.1775, 3.621550  
39756, 14626, 1449.1156, 3.621395  
39757, 13536, 1449.0537, 3.621240  
39758, 13016, 1448.9918, 3.621085  
39759, 13600, 1448.9298, 3.620931  
39760, 14924, 1448.8679, 3.620776  
39761, 15986, 1448.8060, 3.620621  
39762, 16146, 1448.7441, 3.620466  
39763, 15684, 1448.6821, 3.620312  
39764, 15364, 1448.6202, 3.620157  
39765, 15510, 1448.5583, 3.620002  
39766, 15672, 1448.4963, 3.619847  
39767, 15238, 1448.4344, 3.619692  
39768, 14250, 1448.3725, 3.619538  
39769, 13402, 1448.3106, 3.619383  
39770, 13254, 1448.2486, 3.619228  
39771, 13584, 1448.1867, 3.619073  
39772, 13666, 1448.1248, 3.618919  
39773, 13186, 1448.0629, 3.618764  
39774, 12646, 1448.0009, 3.618609  
39775, 12824, 1447.9390, 3.618454  
39776, 13844, 1447.8771, 3.618300  
39777, 14986, 1447.8152, 3.618145  
39778, 15412, 1447.7532, 3.617990  
39779, 15042, 1447.6913, 3.617835  
39780, 14518, 1447.6294, 3.617681  
39781, 14414, 1447.5674, 3.617526  
39782, 14590, 1447.5055, 3.617371  
39783, 14472, 1447.4436, 3.617216  
39784, 13860, 1447.3817, 3.617062  
39785, 13236, 1447.3197, 3.616907  
39786, 13220, 1447.2578, 3.616752  
39787, 13818, 1447.1959, 3.616597  
39788, 14382, 1447.1340, 3.616443  
39789, 14360, 1447.0720, 3.616288  
39790, 13910, 1447.0101, 3.616133  
39791, 13718, 1446.9482, 3.615978  
39792, 14144, 1446.8862, 3.615824  
39793, 14810, 1446.8243, 3.615669  
39794, 15088, 1446.7624, 3.615514  
39795, 14884, 1446.7005, 3.615359  
39796, 14798, 1446.6385, 3.615204  
39797, 15436, 1446.5766, 3.615050  
39798, 16654, 1446.5147, 3.614895  
39799, 17694, 1446.4528, 3.614740  
39800, 18000, 1446.3908, 3.614585  
39801, 17812, 1446.3289, 3.614431  
39802, 17810, 1446.2670, 3.614276  
39803, 18320, 1446.2051, 3.614121  
39804, 18966, 1446.1431, 3.613966  
39805, 19214, 1446.0812, 3.613812  
39806, 19040, 1446.0193, 3.613657  
39807, 18952, 1445.9573, 3.613502  
39808, 19266, 1445.8954, 3.613347  
39809, 19586, 1445.8335, 3.613193  
39810, 19178, 1445.7716, 3.613038  
39811, 17844, 1445.7096, 3.612883  
39812, 16286, 1445.6477, 3.612728  
39813, 15450, 1445.5858, 3.612574  
39814, 15592, 1445.5239, 3.612419  
39815, 16072, 1445.4619, 3.612264  
39816, 16134, 1445.4000, 3.612109  
39817, 15740, 1445.3381, 3.611955  
39818, 15524, 1445.2761, 3.611800  
39819, 15978, 1445.2142, 3.611645  
39820, 16828, 1445.1523, 3.611490  
39821, 17360, 1445.0904, 3.611336  
39822, 17258, 1445.0284, 3.611181  
39823, 16980, 1444.9665, 3.611026  
39824, 17168, 1444.9046, 3.610871  
39825, 17852, 1444.8427, 3.610717  
39826, 18348, 1444.7807, 3.610562  
39827, 18000, 1444.7188, 3.610407  
39828, 16906, 1444.6569, 3.610252  
39829, 15786, 1444.5950, 3.610097  
39830, 15196, 1444.5330, 3.609943  
39831, 15000, 1444.4711, 3.609788  
39832, 14688, 1444.4092, 3.609633  
39833, 14110, 1444.3472, 3.609478  
39834, 13730, 1444.2853, 3.609324  
39835, 14076, 1444.2234, 3.609169  
39836, 15092, 1444.1615, 3.609014  
39837, 16118, 1444.0995, 3.608859  
39838, 16538, 1444.0376, 3.608705  
39839, 16290, 1443.9757, 3.608550  
39840, 15738, 1443.9138, 3.608395  
39841, 15112, 1443.8518, 3.608240  
39842, 14322, 1443.7899, 3.608086  
39843, 13276, 1443.7280, 3.607931  
39844, 12288, 1443.6661, 3.607776  
39845, 11896, 1443.6041, 3.607621  
39846, 12270, 1443.5422, 3.607467  
39847, 12904, 1443.4803, 3.607312  
39848, 13106, 1443.4183, 3.607157  
39849, 12750, 1443.3564, 3.607002  
39850, 12426, 1443.2945, 3.606848  
39851, 12770, 1443.2326, 3.606693  
39852, 13700, 1443.1706, 3.606538  
39853, 14424, 1443.1087, 3.606383  
39854, 14298, 1443.0468, 3.606229  
39855, 13504, 1442.9849, 3.606074  
39856, 12846, 1442.9229, 3.605919  
39857, 12888, 1442.8610, 3.605764  
39858, 13386, 1442.7991, 3.605610

39859, 13682, 1442.7371, 3.605455  
39860, 13518, 1442.6752, 3.605300  
39861, 13324, 1442.6133, 3.605145  
39862, 13686, 1442.5514, 3.604990  
39863, 14606, 1442.4894, 3.604836  
39864, 15484, 1442.4275, 3.604681  
39865, 15754, 1442.3656, 3.604526  
39866, 15472, 1442.3037, 3.604371  
39867, 15142, 1442.2417, 3.604217  
39868, 15058, 1442.1798, 3.604062  
39869, 15032, 1442.1179, 3.603907  
39870, 14736, 1442.0560, 3.603752  
39871, 14294, 1441.9940, 3.603598  
39872, 14236, 1441.9321, 3.603443  
39873, 14880, 1441.8702, 3.603288  
39874, 15858, 1441.8082, 3.603133  
39875, 16356, 1441.7463, 3.602979  
39876, 15938, 1441.6844, 3.602824  
39877, 14940, 1441.6225, 3.602669  
39878, 14096, 1441.5605, 3.602514  
39879, 13796, 1441.4986, 3.602360  
39880, 13806, 1441.4367, 3.602205  
39881, 13756, 1441.3748, 3.602050  
39882, 13676, 1441.3128, 3.601895  
39883, 13954, 1441.2509, 3.601741  
39884, 14812, 1441.1890, 3.601586  
39885, 15914, 1441.1270, 3.601431  
39886, 16680, 1441.0651, 3.601276  
39887, 16894, 1441.0032, 3.601122  
39888, 16898, 1440.9413, 3.600967  
39889, 17114, 1440.8793, 3.600812  
39890, 17504, 1440.8174, 3.600657  
39891, 17638, 1440.7555, 3.600503  
39892, 17242, 1440.6936, 3.600348  
39893, 16576, 1440.6316, 3.600193  
39894, 16136, 1440.5697, 3.600038  
39895, 16034, 1440.5078, 3.599883  
39896, 15884, 1440.4459, 3.599729  
39897, 15316, 1440.3839, 3.599574  
39898, 14568, 1440.3220, 3.599419  
39899, 14342, 1440.2601, 3.599264  
39900, 15038, 1440.1981, 3.599110  
39901, 16178, 1440.1362, 3.598955  
39902, 16800, 1440.0743, 3.598800  
39903, 16378, 1440.0124, 3.598645  
39904, 15382, 1439.9504, 3.598491  
39905, 14792, 1439.8885, 3.598336  
39906, 15144, 1439.8266, 3.598181  
39907, 16098, 1439.7647, 3.598026  
39908, 16934, 1439.7027, 3.597872  
39909, 17286, 1439.6408, 3.597717  
39910, 17372, 1439.5789, 3.597562  
39911, 17500, 1439.5169, 3.597407  
39912, 17614, 1439.4550, 3.597253  
39913, 17392, 1439.3931, 3.597098  
39914, 16770, 1439.3312, 3.596943  
39915, 16142, 1439.2692, 3.596788  
39916, 15918, 1439.2073, 3.596634  
39917, 16016, 1439.1454, 3.596479  
39918, 15892, 1439.0835, 3.596324  
39919, 15176, 1439.0215, 3.596169  
39920, 14154, 1438.9596, 3.596015  
39921, 13542, 1438.8977, 3.595860  
39922, 13784, 1438.8358, 3.595705  
39923, 14614, 1438.7738, 3.595550  
39924, 15400, 1438.7119, 3.595396  
39925, 15820, 1438.6500, 3.595241  
39926, 16058, 1438.5880, 3.595086  
39927, 16450, 1438.5261, 3.594931  
39928, 16962, 1438.4642, 3.594776  
39929, 17242, 1438.4023, 3.594622  
39930, 17090, 1438.3403, 3.594467  
39931, 16746, 1438.2784, 3.594312  
39932, 16620, 1438.2165, 3.594157  
39933, 16776, 1438.1546, 3.594003  
39934, 16856, 1438.0926, 3.593848  
39935, 16500, 1438.0307, 3.593693  
39936, 15822, 1437.9688, 3.593538  
39937, 15298, 1437.9068, 3.593384  
39938, 15202, 1437.8449, 3.593229  
39939, 15320, 1437.7830, 3.593074  
39940, 15244, 1437.7211, 3.592919  
39941, 14936, 1437.6591, 3.592765  
39942, 14820, 1437.5972, 3.592610  
39943, 15244, 1437.5353, 3.592455  
39944, 15992, 1437.4734, 3.592300  
39945, 16422, 1437.4114, 3.592146  
39946, 16170, 1437.3495, 3.591991  
39947, 15586, 1437.2876, 3.591836  
39948, 15368, 1437.2257, 3.591681  
39949, 15796, 1437.1637, 3.591527  
39950, 16416, 1437.1018, 3.591372  
39951, 16588, 1437.0399, 3.591217  
39952, 16238, 1436.9779, 3.591062  
39953, 15936, 1436.9160, 3.590908  
39954, 16204, 1436.8541, 3.590753  
39955, 16894, 1436.7922, 3.590598  
39956, 17334, 1436.7302, 3.590443  
39957, 17068, 1436.6683, 3.590289  
39958, 16362, 1436.6064, 3.590134  
39959, 15852, 1436.5445, 3.589979  
39960, 15772, 1436.4825, 3.589824  
39961, 15740, 1436.4206, 3.589669  
39962, 15264, 1436.3587, 3.589515  
39963, 14438, 1436.2967, 3.589360  
39964, 13920, 1436.2348, 3.589205  
39965, 14218, 1436.1729, 3.589050  
39966, 15096, 1436.1110, 3.588896  
39967, 15856, 1436.0490, 3.588741  
39968, 16086, 1435.9871, 3.588586  
39969, 16094, 1435.9252, 3.588431  
39970, 16454, 1435.8633, 3.588277  
39971, 17254, 1435.8013, 3.588122  
39972, 17942, 1435.7394, 3.587967  
39973, 17922, 1435.6775, 3.587812  
39974, 17266, 1435.6156, 3.587658  
39975, 16660, 1435.5536, 3.587503  
39976, 16720, 1435.4917, 3.587348  
39977, 17372, 1435.4298, 3.587193  
39978, 18034, 1435.3678, 3.587039  
39979, 18282, 1435.3059, 3.586884  
39980, 18194, 1435.2440, 3.586729  
39981, 18098, 1435.1821, 3.586574  
39982, 18080, 1435.1201, 3.586420  
39983, 17950, 1435.0582, 3.586265  
39984, 17620, 1434.9963, 3.586110  
39985, 17376, 1434.9344, 3.585955  
39986, 17580, 1434.8724, 3.585801  
39987, 18154, 1434.8105, 3.585646  
39988, 18504, 1434.7486, 3.585491  
39989, 18096, 1434.6866, 3.585336  
39990, 17084, 1434.6247, 3.585182  
39991, 16202, 1434.5628, 3.585027  
39992, 16028, 1434.5009, 3.584872  
39993, 16438, 1434.4389, 3.584717  
39994, 16822, 1434.3770, 3.584562  
39995, 16796, 1434.3151, 3.584408  
39996, 16602, 1434.2532, 3.584253  
39997, 16662, 1434.1912, 3.584098  
39998, 16980, 1434.1293, 3.583943  
39999, 17050, 1434.0674, 3.583789  
40000, 16516, 1434.0055, 3.583634  
40001, 15748, 1433.9435, 3.583479  
40002, 15572, 1433.8816, 3.583324  
40003, 16394, 1433.8197, 3.583170  
40004, 17666, 1433.7577, 3.583015  
40005, 18386, 1433.6958, 3.582860  
40006, 18140, 1433.6339, 3.582705  
40007, 17532, 1433.5720, 3.582551  
40008, 17552, 1433.5100, 3.582396  
40009, 18538, 1433.4481, 3.582241  
40010, 19848, 1433.3862, 3.582086  
40011, 20536, 1433.3243, 3.581932  
40012, 20306, 1433.2623, 3.581777  
40013, 19692, 1433.2004, 3.581622  
40014, 19390, 1433.1385, 3.581467  
40015, 19528, 1433.0765, 3.581313  
40016, 19652, 1433.0146, 3.581158  
40017, 19352, 1432.9527, 3.581003  
40018, 18756, 1432.8908, 3.580848  
40019, 18372, 1432.8288, 3.580694  
40020, 18566, 1432.7669, 3.580539  
40021, 19236, 1432.7050, 3.580384  
40022, 20046, 1432.6431, 3.580229  
40023, 20740, 1432.5811, 3.580075  
40024, 21194, 1432.5192, 3.579920  
40025, 21238, 1432.4573, 3.579765  
40026, 20628, 1432.3954, 3.579610  
40027, 19284, 1432.3334, 3.579455  
40028, 17596, 1432.2715, 3.579301  
40029, 16232, 1432.2096, 3.579146  
40030, 15658, 1432.1476, 3.578991  
40031, 15752, 1432.0857, 3.578836  
40032, 15996, 1432.0238, 3.578682  
40033, 15992, 1431.9619, 3.578527  
40034, 15754, 1431.8999, 3.578372  
40035, 15534, 1431.8380, 3.578217  
40036, 15450, 1431.7761, 3.578063  
40037, 15418, 1431.7142, 3.577908  
40038, 15408, 1431.6522, 3.577753  
40039, 15600, 1431.5903, 3.577598  
40040, 16184, 1431.5284, 3.577444  
40041, 16996, 1431.4664, 3.577289  
40042, 17506, 1431.4045, 3.577134  
40043, 17274, 1431.3426, 3.576979  
40044, 16386, 1431.2807, 3.576825  
40045, 15404, 1431.2187, 3.576670  
40046, 14832, 1431.1568, 3.576515  
40047, 14708, 1431.0949, 3.576360  
40048, 14750, 1431.0330, 3.576206  
40049, 14794, 1430.9710, 3.576051  
40050, 14976, 1430.9091, 3.575896  
40051, 15428, 1430.8472, 3.575741  
40052, 15930, 1430.7853, 3.575587  
40053, 16044, 1430.7233, 3.575432  
40054, 15620, 1430.6614, 3.575277  
40055, 15086, 1430.5995, 3.575122  
40056, 15124, 1430.5375, 3.574968  
40057, 15926, 1430.4756, 3.574813  
40058, 16982, 1430.4137, 3.574658  
40059, 17590, 1430.3518, 3.574503  
40060, 17606, 1430.2898, 3.574348  
40061, 17544, 1430.2279, 3.574194  
40062, 17934, 1430.1660, 3.574039  
40063, 18668, 1430.1041, 3.573884  
40064, 19076, 1430.0421, 3.573729  
40065, 18680, 1429.9802, 3.573575  
40066, 17768, 1429.9183, 3.573420  
40067, 17116, 1429.8564, 3.573265  
40068, 17202, 1429.7944, 3.573110  
40069, 17766, 1429.7325, 3.572956  
40070, 18164, 1429.6706, 3.572801  
40071, 18080, 1429.6086, 3.572646  
40072, 17752, 1429.5467, 3.572491  
40073, 17522, 1429.4848, 3.572337  
40074, 17388, 1429.4229, 3.572182  
40075, 17066, 1429.3609, 3.572027  
40076, 16476, 1429.2990, 3.571872  
40077, 16004, 1429.2371, 3.571718  
40078, 16114, 1429.1752, 3.571563  
40079, 16760, 1429.1132, 3.571408  
40080, 17350, 1429.0513, 3.571253  
40081, 17350, 1428.9894, 3.571099  
40082, 16862, 1428.9274, 3.570944  
40083, 16504, 1428.8655, 3.570789  
40084, 16700, 1428.8036, 3.570634  
40085, 17186, 1428.7417, 3.570480  
40086, 17344, 1428.6797, 3.570325

40087, 16902, 1428.6178, 3.570170  
40088, 16256, 1428.5559, 3.570015  
40089, 16000, 1428.4940, 3.569860  
40090, 16242, 1428.4320, 3.569706  
40091, 16570, 1428.3701, 3.569551  
40092, 16554, 1428.3082, 3.569396  
40093, 16306, 1428.2463, 3.569241  
40094, 16276, 1428.1843, 3.569087  
40095, 16648, 1428.1224, 3.568932  
40096, 17056, 1428.0605, 3.568777  
40097, 16988, 1427.9985, 3.568622  
40098, 16430, 1427.9366, 3.568468  
40099, 15964, 1427.8747, 3.568313  
40100, 16118, 1427.8128, 3.568158  
40101, 16774, 1427.7508, 3.568003  
40102, 17268, 1427.6889, 3.567849  
40103, 17082, 1427.6270, 3.567694  
40104, 16356, 1427.5651, 3.567539  
40105, 15650, 1427.5031, 3.567384  
40106, 15284, 1427.4412, 3.567230  
40107, 15056, 1427.3793, 3.567075  
40108, 14628, 1427.3173, 3.566920  
40109, 14034, 1427.2554, 3.566765  
40110, 13672, 1427.1935, 3.566611  
40111, 13786, 1427.1316, 3.566456  
40112, 14122, 1427.0696, 3.566301  
40113, 14228, 1427.0077, 3.566146  
40114, 14010, 1426.9458, 3.565992  
40115, 13874, 1426.8839, 3.565837  
40116, 14196, 1426.8219, 3.565682  
40117, 14788, 1426.7600, 3.565527  
40118, 15018, 1426.6981, 3.565373  
40119, 14552, 1426.6362, 3.565218  
40120, 13838, 1426.5742, 3.565063  
40121, 13722, 1426.5123, 3.564908  
40122, 14566, 1426.4504, 3.564753  
40123, 15850, 1426.3884, 3.564599  
40124, 16684, 1426.3265, 3.564444  
40125, 16704, 1426.2646, 3.564289  
40126, 16304, 1426.2027, 3.564134  
40127, 16048, 1426.1407, 3.563980  
40128, 16014, 1426.0788, 3.563825  
40129, 15816, 1426.0169, 3.563670  
40130, 15250, 1425.9550, 3.563515  
40131, 14688, 1425.8930, 3.563361  
40132, 14680, 1425.8311, 3.563206  
40133, 15250, 1425.7692, 3.563051  
40134, 15762, 1425.7072, 3.562896  
40135, 15598, 1425.6453, 3.562742  
40136, 14894, 1425.5834, 3.562587  
40137, 14418, 1425.5215, 3.562432  
40138, 14718, 1425.4595, 3.562277  
40139, 15512, 1425.3976, 3.562123  
40140, 16028, 1425.3357, 3.561968  
40141, 15946, 1425.2738, 3.561813  
40142, 15788, 1425.2118, 3.561658  
40143, 16314, 1425.1499, 3.561504  
40144, 17580, 1425.0880, 3.561349  
40145, 18778, 1425.0261, 3.561194  
40146, 19074, 1424.9641, 3.561039  
40147, 18468, 1424.9022, 3.560885  
40148, 17718, 1424.8403, 3.560730  
40149, 17444, 1424.7783, 3.560575  
40150, 17474, 1424.7164, 3.560420  
40151, 17184, 1424.6545, 3.560266  
40152, 16354, 1424.5926, 3.560111  
40153, 15498, 1424.5306, 3.559956  
40154, 15258, 1424.4687, 3.559801  
40155, 15590, 1424.4068, 3.559646  
40156, 15760, 1424.3449, 3.559492  
40157, 15236, 1424.2829, 3.559337  
40158, 14364, 1424.2210, 3.559182  
40159, 14032, 1424.1591, 3.559027  
40160, 14650, 1424.0971, 3.558873  
40161, 15658, 1424.0352, 3.558718  
40162, 16108, 1423.9733, 3.558563  
40163, 15744, 1423.9114, 3.558408  
40164, 15288, 1423.8494, 3.558254  
40165, 15600, 1423.7875, 3.558099  
40166, 16674, 1423.7256, 3.557944  
40167, 17620, 1423.6637, 3.557789  
40168, 17628, 1423.6017, 3.557635  
40169, 16844, 1423.5398, 3.557480  
40170, 16136, 1423.4779, 3.557325  
40171, 16134, 1423.4160, 3.557170  
40172, 16592, 1423.3540, 3.557016  
40173, 16852, 1423.2921, 3.556861  
40174, 16696, 1423.2302, 3.556706  
40175, 16606, 1423.1682, 3.556551  
40176, 17100, 1423.1063, 3.556397  
40177, 18002, 1423.0444, 3.556242  
40178, 18566, 1422.9825, 3.556087  
40179, 18318, 1422.9205, 3.555932  
40180, 17622, 1422.8586, 3.555778  
40181, 17260, 1422.7967, 3.555623  
40182, 17486, 1422.7348, 3.555468  
40183, 17706, 1422.6728, 3.555313  
40184, 17166, 1422.6109, 3.555159  
40185, 15880, 1422.5490, 3.555004  
40186, 14708, 1422.4870, 3.554849  
40187, 14466, 1422.4251, 3.554694  
40188, 15064, 1422.3632, 3.554539  
40189, 15638, 1422.3013, 3.554385  
40190, 15496, 1422.2393, 3.554230  
40191, 14840, 1422.1774, 3.554075  
40192, 14466, 1422.1155, 3.553920  
40193, 14844, 1422.0536, 3.553766  
40194, 15674, 1421.9916, 3.553611  
40195, 16258, 1421.9297, 3.553456  
40196, 16284, 1421.8678, 3.553301  
40197, 16000, 1421.8059, 3.553147  
40198, 15752, 1421.7439, 3.552992  
40199, 15510, 1421.6820, 3.552837  
40200, 14998, 1421.6201, 3.552682  
40201, 14248, 1421.5581, 3.552528  
40202, 13782, 1421.4962, 3.552373  
40203, 14160, 1421.4343, 3.552218  
40204, 15352, 1421.3724, 3.552063  
40205, 16672, 1421.3104, 3.551909  
40206, 17418, 1421.2485, 3.551754  
40207, 17458, 1421.1866, 3.551599  
40208, 17200, 1421.1247, 3.551444  
40209, 17022, 1421.0627, 3.551290  
40210, 16898, 1421.0008, 3.551135  
40211, 16602, 1420.9389, 3.550980  
40212, 16154, 1420.8769, 3.550825  
40213, 15906, 1420.8150, 3.550671  
40214, 16090, 1420.7531, 3.550516  
40215, 16454, 1420.6912, 3.550361  
40216, 16464, 1420.6292, 3.550206  
40217, 15878, 1420.5673, 3.550052  
40218, 15046, 1420.5054, 3.549897  
40219, 14592, 1420.4435, 3.549742  
40220, 14776, 1420.3815, 3.549587  
40221, 15324, 1420.3196, 3.549432  
40222, 15812, 1420.2577, 3.549278  
40223, 16130, 1420.1958, 3.549123  
40224, 16468, 1420.1338, 3.548968  
40225, 16890, 1420.0719, 3.548813  
40226, 17140, 1420.0100, 3.548659  
40227, 16928, 1419.9480, 3.548504  
40228, 16366, 1419.8861, 3.548349  
40229, 15950, 1419.8242, 3.548194  
40230, 16048, 1419.7623, 3.548040  
40231, 16478, 1419.7003, 3.547885  
40232, 16760, 1419.6384, 3.547730  
40233, 16710, 1419.5765, 3.547575  
40234, 16726, 1419.5146, 3.547421  
40235, 17312, 1419.4526, 3.547266  
40236, 18408, 1419.3907, 3.547111  
40237, 19284, 1419.3288, 3.546956  
40238, 19250, 1419.2668, 3.546802  
40239, 18358, 1419.2049, 3.546647  
40240, 17358, 1419.1430, 3.546492  
40241, 16894, 1419.0811, 3.546337  
40242, 16880, 1419.0191, 3.546183  
40243, 16674, 1418.9572, 3.546028  
40244, 15906, 1418.8953, 3.545873  
40245, 14892, 1418.8334, 3.545718  
40246, 14290, 1418.7714, 3.545564  
40247, 14344, 1418.7095, 3.545409  
40248, 14670, 1418.6476, 3.545254  
40249, 14776, 1418.5857, 3.545099  
40250, 14630, 1418.5237, 3.544945  
40251, 14640, 1418.4618, 3.544790  
40252, 15072, 1418.3999, 3.544635  
40253, 15660, 1418.3379, 3.544480  
40254, 15922, 1418.2760, 3.544325  
40255, 15732, 1418.2141, 3.544171  
40256, 15496, 1418.1522, 3.544016  
40257, 15662, 1418.0902, 3.543861  
40258, 16178, 1418.0283, 3.543706  
40259, 16586, 1417.9664, 3.543552  
40260, 16644, 1417.9045, 3.543397  
40261, 16694, 1417.8425, 3.543242  
40262, 17248, 1417.7806, 3.543087  
40263, 18294, 1417.7187, 3.542933  
40264, 19132, 1417.6567, 3.542778  
40265, 19076, 1417.5948, 3.542623  
40266, 18208, 1417.5329, 3.542468  
40267, 17378, 1417.4710, 3.542314  
40268, 17356, 1417.4090, 3.542159  
40269, 18058, 1417.3471, 3.542004  
40270, 18712, 1417.2852, 3.541849  
40271, 18724, 1417.2233, 3.541695  
40272, 18252, 1417.1613, 3.541540  
40273, 17894, 1417.0994, 3.541385  
40274, 17908, 1417.0375, 3.541230  
40275, 17936, 1416.9756, 3.541076  
40276, 17500, 1416.9136, 3.540921  
40277, 16648, 1416.8517, 3.540766  
40278, 15928, 1416.7898, 3.540611  
40279, 15714, 1416.7278, 3.540457  
40280, 15728, 1416.6659, 3.540302  
40281, 15390, 1416.6040, 3.540147  
40282, 14574, 1416.5421, 3.539992  
40283, 13868, 1416.4801, 3.539838  
40284, 13988, 1416.4182, 3.539683  
40285, 14934, 1416.3563, 3.539528  
40286, 15958, 1416.2944, 3.539373  
40287, 16302, 1416.2324, 3.539218  
40288, 15962, 1416.1705, 3.539064  
40289, 15578, 1416.1086, 3.538909  
40290, 15600, 1416.0467, 3.538754  
40291, 15780, 1415.9847, 3.538599  
40292, 15494, 1415.9228, 3.538445  
40293, 14560, 1415.8609, 3.538290  
40294, 13538, 1415.7989, 3.538135  
40295, 13150, 1415.7370, 3.537980  
40296, 13510, 1415.6751, 3.537826  
40297, 14034, 1415.6132, 3.537671  
40298, 14128, 1415.5512, 3.537516  
40299, 13840, 1415.4893, 3.537361  
40300, 13730, 1415.4274, 3.537207  
40301, 14174, 1415.3655, 3.537052  
40302, 14908, 1415.3035, 3.536897  
40303, 15396, 1415.2416, 3.536742  
40304, 15448, 1415.1797, 3.536588  
40305, 15430, 1415.1177, 3.536433  
40306, 15764, 1415.0558, 3.536278  
40307, 16388, 1414.9939, 3.536123  
40308, 16832, 1414.9320, 3.535969  
40309, 16812, 1414.8700, 3.535814  
40310, 16594, 1414.8081, 3.535659  
40311, 16700, 1414.7462, 3.535504  
40312, 17272, 1414.6843, 3.535350  
40313, 17874, 1414.6223, 3.535195  
40314, 17976, 1414.5604, 3.535040

40315, 17506, 1414.4985, 3.534885  
40316, 16902, 1414.4366, 3.534731  
40317, 16588, 1414.3746, 3.534576  
40318, 16560, 1414.3127, 3.534421  
40319, 16536, 1414.2508, 3.534266  
40320, 16414, 1414.1888, 3.534111  
40321, 16406, 1414.1269, 3.533957  
40322, 16722, 1414.0650, 3.533802  
40323, 17170, 1414.0031, 3.533647  
40324, 17324, 1413.9411, 3.533492  
40325, 17030, 1413.8792, 3.533338  
40326, 16690, 1413.8173, 3.533183  
40327, 16834, 1413.7554, 3.533028  
40328, 17492, 1413.6934, 3.532873  
40329, 18102, 1413.6315, 3.532719  
40330, 18106, 1413.5696, 3.532564  
40331, 17578, 1413.5076, 3.532409  
40332, 17162, 1413.4457, 3.532254  
40333, 17322, 1413.3838, 3.532100  
40334, 17814, 1413.3219, 3.531945  
40335, 17992, 1413.2599, 3.531790  
40336, 17558, 1413.1980, 3.531635  
40337, 16954, 1413.1361, 3.531481  
40338, 16804, 1413.0742, 3.531326  
40339, 17184, 1413.0122, 3.531171  
40340, 17476, 1412.9503, 3.531016  
40341, 17094, 1412.8884, 3.530862  
40342, 16168, 1412.8265, 3.530707  
40343, 15416, 1412.7645, 3.530552  
40344, 15322, 1412.7026, 3.530397  
40345, 15604, 1412.6407, 3.530243  
40346, 15596, 1412.5787, 3.530088  
40347, 15078, 1412.5168, 3.529933  
40348, 14578, 1412.4549, 3.529778  
40349, 14762, 1412.3930, 3.529624  
40350, 15592, 1412.3310, 3.529469  
40351, 16302, 1412.2691, 3.529314  
40352, 16256, 1412.2072, 3.529159  
40353, 15730, 1412.1453, 3.529004  
40354, 15686, 1412.0833, 3.528850  
40355, 16750, 1412.0214, 3.528695  
40356, 18506, 1411.9595, 3.528540  
40357, 19878, 1411.8975, 3.528385  
40358, 20138, 1411.8356, 3.528231  
40359, 19574, 1411.7737, 3.528076  
40360, 19032, 1411.7118, 3.527921  
40361, 19046, 1411.6498, 3.527766  
40362, 19410, 1411.5879, 3.527612  
40363, 19580, 1411.5260, 3.527457  
40364, 19316, 1411.4641, 3.527302  
40365, 18832, 1411.4021, 3.527147  
40366, 18414, 1411.3402, 3.526993  
40367, 18072, 1411.2783, 3.526838  
40368, 17632, 1411.2164, 3.526683  
40369, 17094, 1411.1544, 3.526528  
40370, 16640, 1411.0925, 3.526374  
40371, 16352, 1411.0306, 3.526219  
40372, 16014, 1410.9686, 3.526064  
40373, 15354, 1410.9067, 3.525909  
40374, 14528, 1410.8448, 3.525755  
40375, 14118, 1410.7829, 3.525600  
40376, 14566, 1410.7209, 3.525445  
40377, 15604, 1410.6590, 3.525290  
40378, 16386, 1410.5971, 3.525136  
40379, 16298, 1410.5352, 3.524981  
40380, 15564, 1410.4732, 3.524826  
40381, 15024, 1410.4113, 3.524671  
40382, 15242, 1410.3494, 3.524516  
40383, 15966, 1410.2874, 3.524362  
40384, 16472, 1410.2255, 3.524207  
40385, 16380, 1410.1636, 3.524052  
40386, 15994, 1410.1017, 3.523897  
40387, 15870, 1410.0397, 3.523743  
40388, 16116, 1409.9778, 3.523588  
40389, 16290, 1409.9159, 3.523433  
40390, 15992, 1409.8540, 3.523278

40391, 15370, 1409.7920, 3.523124  
40392, 14958, 1409.7301, 3.522969  
40393, 15030, 1409.6682, 3.522814  
40394, 15252, 1409.6063, 3.522659  
40395, 15080, 1409.5443, 3.522505  
40396, 14416, 1409.4824, 3.522350  
40397, 13728, 1409.4205, 3.522195  
40398, 13532, 1409.3585, 3.522040  
40399, 13796, 1409.2966, 3.521886  
40400, 14004, 1409.2347, 3.521731  
40401, 13794, 1409.1728, 3.521576  
40402, 13396, 1409.1108, 3.521421  
40403, 13350, 1409.0489, 3.521267  
40404, 13856, 1408.9870, 3.521112  
40405, 14514, 1408.9251, 3.520957  
40406, 14750, 1408.8631, 3.520802  
40407, 14466, 1408.8012, 3.520648  
40408, 14098, 1408.7393, 3.520493  
40409, 14140, 1408.6773, 3.520338  
40410, 14606, 1408.6154, 3.520183  
40411, 15106, 1408.5535, 3.520029  
40412, 15326, 1408.4916, 3.519874  
40413, 15352, 1408.4296, 3.519719  
40414, 15448, 1408.3677, 3.519564  
40415, 15646, 1408.3058, 3.519409  
40416, 15724, 1408.2439, 3.519255  
40417, 15520, 1408.1819, 3.519100  
40418, 15218, 1408.1200, 3.518945  
40419, 15144, 1408.0581, 3.518790  
40420, 15352, 1407.9962, 3.518636  
40421, 15486, 1407.9342, 3.518481  
40422, 15186, 1407.8723, 3.518326  
40423, 14500, 1407.8104, 3.518171  
40424, 13840, 1407.7484, 3.518017  
40425, 13476, 1407.6865, 3.517862  
40426, 13228, 1407.6246, 3.517707  
40427, 12728, 1407.5627, 3.517552  
40428, 12006, 1407.5007, 3.517398  
40429, 11586, 1407.4388, 3.517243  
40430, 11952, 1407.3769, 3.517088  
40431, 12926, 1407.3150, 3.516933  
40432, 13784, 1407.2530, 3.516779  
40433, 13984, 1407.1911, 3.516624  
40434, 13802, 1407.1292, 3.516469  
40435, 14012, 1407.0672, 3.516314  
40436, 15002, 1407.0053, 3.516160  
40437, 16254, 1406.9434, 3.516005  
40438, 16818, 1406.8815, 3.515850  
40439, 16296, 1406.8195, 3.515695  
40440, 15230, 1406.7576, 3.515541  
40441, 14528, 1406.6957, 3.515386  
40442, 14538, 1406.6338, 3.515231  
40443, 14812, 1406.5718, 3.515076  
40444, 14740, 1406.5099, 3.514922  
40445, 14310, 1406.4480, 3.514767  
40446, 14070, 1406.3861, 3.514612  
40447, 14452, 1406.3241, 3.514457  
40448, 15232, 1406.2622, 3.514302  
40449, 15802, 1406.2003, 3.514148  
40450, 15872, 1406.1383, 3.513993  
40451, 15780, 1406.0764, 3.513838  
40452, 16034, 1406.0145, 3.513683  
40453, 16698, 1405.9526, 3.513529  
40454, 17280, 1405.8906, 3.513374  
40455, 17324, 1405.8287, 3.513219  
40456, 16904, 1405.7668, 3.513064  
40457, 16542, 1405.7049, 3.512910  
40458, 16578, 1405.6429, 3.512755  
40459, 16820, 1405.5810, 3.512600  
40460, 16824, 1405.5191, 3.512445  
40461, 16438, 1405.4571, 3.512291  
40462, 15944, 1405.3952, 3.512136  
40463, 15678, 1405.3333, 3.511981  
40464, 15624, 1405.2714, 3.511826  
40465, 15504, 1405.2094, 3.511672  
40466, 15212, 1405.1475, 3.511517

40467, 14988, 1405.0856, 3.511362  
40468, 15094, 1405.0237, 3.511207  
40469, 15390, 1404.9617, 3.511053  
40470, 15420, 1404.8998, 3.510898  
40471, 14938, 1404.8379, 3.510743  
40472, 14292, 1404.7760, 3.510588  
40473, 14104, 1404.7140, 3.510434  
40474, 14574, 1404.6521, 3.510279  
40475, 15206, 1404.5902, 3.510124  
40476, 15304, 1404.5282, 3.509969  
40477, 14742, 1404.4663, 3.509815  
40478, 14110, 1404.4044, 3.509660  
40479, 14064, 1404.3425, 3.509505  
40480, 14618, 1404.2805, 3.509350  
40481, 15196, 1404.2186, 3.509195  
40482, 15338, 1404.1567, 3.509041  
40483, 15254, 1404.0948, 3.508886  
40484, 15544, 1404.0328, 3.508731  
40485, 16422, 1403.9709, 3.508576  
40486, 17368, 1403.9090, 3.508422  
40487, 17596, 1403.8471, 3.508267  
40488, 16894, 1403.7851, 3.508112  
40489, 15818, 1403.7232, 3.507957  
40490, 15090, 1403.6613, 3.507803  
40491, 14872, 1403.5993, 3.507648  
40492, 14702, 1403.5374, 3.507493  
40493, 14144, 1403.4755, 3.507338  
40494, 13310, 1403.4136, 3.507184  
40495, 12730, 1403.3516, 3.507029  
40496, 12742, 1403.2897, 3.506874  
40497, 13198, 1403.2278, 3.506719  
40498, 13804, 1403.1659, 3.506565  
40499, 14540, 1403.1039, 3.506410  
40500, 15678, 1403.0420, 3.506255  
40501, 17264, 1402.9801, 3.506100  
40502, 18832, 1402.9181, 3.505946  
40503, 19700, 1402.8562, 3.505791  
40504, 19626, 1402.7943, 3.505636  
40505, 19052, 1402.7324, 3.505481  
40506, 18596, 1402.6704, 3.505327  
40507, 18394, 1402.6085, 3.505172  
40508, 18038, 1402.5466, 3.505017  
40509, 17164, 1402.4847, 3.504862  
40510, 16000, 1402.4227, 3.504708  
40511, 15234, 1402.3608, 3.504553  
40512, 15290, 1402.2989, 3.504398  
40513, 15872, 1402.2370, 3.504243  
40514, 16280, 1402.1750, 3.504088  
40515, 16120, 1402.1131, 3.503934  
40516, 15638, 1402.0512, 3.503779  
40517, 15308, 1401.9892, 3.503624  
40518, 15232, 1401.9273, 3.503469  
40519, 15060, 1401.8654, 3.503315  
40520, 14450, 1401.8035, 3.503160  
40521, 13548, 1401.7415, 3.503005  
40522, 12854, 1401.6796, 3.502850  
40523, 12686, 1401.6177, 3.502696  
40524, 12842, 1401.5558, 3.502541  
40525, 12906, 1401.4938, 3.502386  
40526, 12736, 1401.4319, 3.502231  
40527, 12600, 1401.3700, 3.502077  
40528, 12818, 1401.3080, 3.501922  
40529, 13350, 1401.2461, 3.501767  
40530, 13858, 1401.1842, 3.501612  
40531, 14102, 1401.1223, 3.501458  
40532, 14206, 1401.0603, 3.501303  
40533, 14446, 1400.9984, 3.501148  
40534, 14884, 1400.9365, 3.500993  
40535, 15306, 1400.8746, 3.500839  
40536, 15504, 1400.8126, 3.500684  
40537, 15558, 1400.7507, 3.500529  
40538, 15682, 1400.6888, 3.500374  
40539, 15892, 1400.6269, 3.500220  
40540, 15936, 1400.5649, 3.500065  
40541, 15644, 1400.5030, 3.499910  
40542, 15262, 1400.4411, 3.499755

40543, 15276, 1400.3791, 3.499601  
40544, 15896, 1400.3172, 3.499446  
40545, 16722, 1400.2553, 3.499291  
40546, 17128, 1400.1934, 3.499136  
40547, 16930, 1400.1314, 3.498981  
40548, 16608, 1400.0695, 3.498827  
40549, 16762, 1400.0076, 3.498672  
40550, 17426, 1399.9457, 3.498517  
40551, 17978, 1399.8837, 3.498362  
40552, 17822, 1399.8218, 3.498208  
40553, 17062, 1399.7599, 3.498053  
40554, 16396, 1399.6979, 3.497898  
40555, 16364, 1399.6360, 3.497743  
40556, 16774, 1399.5741, 3.497589  
40557, 16988, 1399.5122, 3.497434  
40558, 16664, 1399.4502, 3.497279  
40559, 16136, 1399.3883, 3.497124  
40560, 15986, 1399.3264, 3.496970  
40561, 16320, 1399.2645, 3.496815  
40562, 16656, 1399.2025, 3.496660  
40563, 16512, 1399.1406, 3.496505  
40564, 16000, 1399.0787, 3.496351  
40565, 15744, 1399.0168, 3.496196  
40566, 16160, 1398.9548, 3.496041  
40567, 17016, 1398.8929, 3.495886  
40568, 17690, 1398.8310, 3.495732  
40569, 17862, 1398.7690, 3.495577  
40570, 17808, 1398.7071, 3.495422  
40571, 17986, 1398.6452, 3.495267  
40572, 18454, 1398.5833, 3.495113  
40573, 18854, 1398.5213, 3.494958  
40574, 18898, 1398.4594, 3.494803  
40575, 18774, 1398.3975, 3.494648  
40576, 18910, 1398.3356, 3.494494  
40577, 19386, 1398.2736, 3.494339  
40578, 19782, 1398.2117, 3.494184  
40579, 19638, 1398.1498, 3.494029  
40580, 19030, 1398.0878, 3.493874  
40581, 18514, 1398.0259, 3.493720  
40582, 18480, 1397.9640, 3.493565  
40583, 18652, 1397.9021, 3.493410  
40584, 18416, 1397.8401, 3.493255  
40585, 17572, 1397.7782, 3.493101  
40586, 16684, 1397.7163, 3.492946  
40587, 16542, 1397.6544, 3.492791  
40588, 17290, 1397.5924, 3.492636  
40589, 18274, 1397.5305, 3.492482  
40590, 18730, 1397.4686, 3.492327  
40591, 18604, 1397.4067, 3.492172  
40592, 18584, 1397.3447, 3.492017  
40593, 19286, 1397.2828, 3.491863  
40594, 20506, 1397.2209, 3.491708  
40595, 21426, 1397.1589, 3.491553  
40596, 21444, 1397.0970, 3.491398  
40597, 20766, 1397.0351, 3.491244  
40598, 20118, 1396.9732, 3.491089  
40599, 19960, 1396.9112, 3.490934  
40600, 20122, 1396.8493, 3.490779  
40601, 20194, 1396.7874, 3.490625  
40602, 20118, 1396.7255, 3.490470  
40603, 20226, 1396.6635, 3.490315  
40604, 20736, 1396.6016, 3.490160  
40605, 21332, 1396.5397, 3.490006  
40606, 21410, 1396.4777, 3.489851  
40607, 20686, 1396.4158, 3.489696  
40608, 19516, 1396.3539, 3.489541  
40609, 18526, 1396.2920, 3.489387  
40610, 17984, 1396.2300, 3.489232  
40611, 17652, 1396.1681, 3.489077  
40612, 17218, 1396.1062, 3.488922  
40613, 16768, 1396.0443, 3.488767  
40614, 16720, 1395.9823, 3.488613  
40615, 17306, 1395.9204, 3.488458  
40616, 18262, 1395.8585, 3.488303  
40617, 19034, 1395.7966, 3.488148  
40618, 19312, 1395.7346, 3.487994

40619, 19218, 1395.6727, 3.487839  
40620, 19040, 1395.6108, 3.487684  
40621, 18874, 1395.5488, 3.487529  
40622, 18598, 1395.4869, 3.487375  
40623, 18192, 1395.4250, 3.487220  
40624, 17890, 1395.3631, 3.487065  
40625, 17952, 1395.3011, 3.486910  
40626, 18314, 1395.2392, 3.486756  
40627, 18564, 1395.1773, 3.486601  
40628, 18296, 1395.1154, 3.486446  
40629, 17502, 1395.0534, 3.486291  
40630, 16510, 1394.9915, 3.486137  
40631, 15618, 1394.9296, 3.485982  
40632, 14892, 1394.8676, 3.485827  
40633, 14306, 1394.8057, 3.485672  
40634, 13994, 1394.7438, 3.485518  
40635, 14170, 1394.6819, 3.485363  
40636, 14818, 1394.6199, 3.485208  
40637, 15500, 1394.5580, 3.485053  
40638, 16510, 1394.4961, 3.484899  
40639, 15442, 1394.4342, 3.484744  
40640, 15160, 1394.3722, 3.484589  
40641, 15384, 1394.3103, 3.484434  
40642, 16030, 1394.2484, 3.484280  
40643, 16488, 1394.1865, 3.484125  
40644, 16286, 1394.1245, 3.483970  
40645, 15664, 1394.0626, 3.483815  
40646, 15396, 1394.0007, 3.483660  
40647, 16000, 1393.9388, 3.483506  
40648, 17202, 1393.8768, 3.483351  
40649, 18260, 1393.8149, 3.483196  
40650, 18750, 1393.7530, 3.483041  
40651, 18906, 1393.6910, 3.482887  
40652, 19256, 1393.6291, 3.482732  
40653, 19910, 1393.5672, 3.482577  
40654, 20432, 1393.5053, 3.482422  
40655, 20408, 1393.4433, 3.482268  
40656, 19964, 1393.3814, 3.482113  
40657, 19684, 1393.3195, 3.481958  
40658, 19962, 1393.2575, 3.481803  
40659, 20582, 1393.1956, 3.481649  
40660, 20978, 1393.1337, 3.481494  
40661, 20880, 1393.0718, 3.481339  
40662, 20538, 1393.0098, 3.481184  
40663, 20322, 1392.9479, 3.481030  
40664, 20216, 1392.8860, 3.480875  
40665, 19840, 1392.8241, 3.480720  
40666, 18942, 1392.7621, 3.480565  
40667, 17794, 1392.7002, 3.480411  
40668, 16946, 1392.6383, 3.480256  
40669, 16634, 1392.5764, 3.480101  
40670, 16562, 1392.5144, 3.479946  
40671, 16326, 1392.4525, 3.479792  
40672, 15938, 1392.3906, 3.479637  
40673, 15834, 1392.3286, 3.479482  
40674, 16302, 1392.2667, 3.479327  
40675, 17084, 1392.2048, 3.479172  
40676, 17578, 1392.1429, 3.479018  
40677, 17508, 1392.0809, 3.478863  
40678, 17198, 1392.0190, 3.478708  
40679, 17196, 1391.9571, 3.478553  
40680, 17620, 1391.8952, 3.478399  
40681, 18064, 1391.8332, 3.478244  
40682, 18092, 1391.7713, 3.478089  
40683, 17764, 1391.7094, 3.477934  
40684, 17528, 1391.6474, 3.477780  
40685, 17626, 1391.5855, 3.477625  
40686, 17776, 1391.5236, 3.477470  
40687, 17566, 1391.4617, 3.477315  
40688, 17040, 1391.3997, 3.477161  
40689, 16798, 1391.3378, 3.477006  
40690, 17316, 1391.2759, 3.476851  
40691, 18308, 1391.2140, 3.476696  
40692, 18894, 1391.1520, 3.476542  
40693, 18466, 1391.0901, 3.476387  
40694, 17328, 1391.0282, 3.476232

40695, 16398, 1390.9663, 3.476077  
40696, 16244, 1390.9043, 3.475923  
40697, 16556, 1390.8424, 3.475768  
40698, 16558, 1390.7805, 3.475613  
40699, 15946, 1390.7185, 3.475458  
40700, 15206, 1390.6566, 3.475304  
40701, 15050, 1390.5947, 3.475149  
40702, 15582, 1390.5328, 3.474994  
40703, 16180, 1390.4708, 3.474839  
40704, 16148, 1390.4089, 3.474685  
40705, 15464, 1390.3470, 3.474530  
40706, 14714, 1390.2851, 3.474375  
40707, 14436, 1390.2231, 3.474220  
40708, 14592, 1390.1612, 3.474065  
40709, 14702, 1390.0993, 3.473911  
40710, 14442, 1390.0374, 3.473756  
40711, 13936, 1389.9754, 3.473601  
40712, 13536, 1389.9135, 3.473446  
40713, 13374, 1389.8516, 3.473292  
40714, 13324, 1389.7897, 3.473137  
40715, 13280, 1389.7277, 3.472982  
40716, 13372, 1389.6658, 3.472827  
40717, 13780, 1389.6039, 3.472673  
40718, 14424, 1389.5419, 3.472518  
40719, 14964, 1389.4800, 3.472363  
40720, 15168, 1389.4181, 3.472208  
40721, 15196, 1389.3562, 3.472054  
40722, 15416, 1389.2942, 3.471899  
40723, 15936, 1389.2323, 3.471744  
40724, 16442, 1389.1704, 3.471589  
40725, 16546, 1389.1084, 3.471435  
40726, 16248, 1389.0465, 3.471280  
40727, 15966, 1388.9846, 3.471125  
40728, 16036, 1388.9227, 3.470970  
40729, 16340, 1388.8607, 3.470816  
40730, 16496, 1388.7988, 3.470661  
40731, 16418, 1388.7369, 3.470506  
40732, 16500, 1388.6750, 3.470351  
40733, 17192, 1388.6130, 3.470197  
40734, 18360, 1388.5511, 3.470042  
40735, 19266, 1388.4892, 3.469887  
40736, 19298, 1388.4273, 3.469732  
40737, 18572, 1388.3653, 3.469578  
40738, 17840, 1388.3034, 3.469423  
40739, 17628, 1388.2415, 3.469268  
40740, 17678, 1388.1795, 3.469113  
40741, 17248, 1388.1176, 3.468958  
40742, 16026, 1388.0557, 3.468804  
40743, 14592, 1387.9938, 3.468649  
40744, 13898, 1387.9318, 3.468494  
40745, 14328, 1387.8699, 3.468339  
40746, 15314, 1387.8080, 3.468185  
40747, 15940, 1387.7461, 3.468030  
40748, 15774, 1387.6841, 3.467875  
40749, 15158, 1387.6222, 3.467720  
40750, 14640, 1387.5603, 3.467566  
40751, 14386, 1387.4983, 3.467411  
40752, 14132, 1387.4364, 3.467256  
40753, 13716, 1387.3745, 3.467101  
40754, 13386, 1387.3126, 3.466947  
40755, 13570, 1387.2506, 3.466792  
40756, 14336, 1387.1887, 3.466637  
40757, 15270, 1387.1268, 3.466482  
40758, 15870, 1387.0649, 3.466328  
40759, 16020, 1387.0029, 3.466173  
40760, 16004, 1386.9410, 3.466018  
40761, 16074, 1386.8791, 3.465863  
40762, 16154, 1386.8172, 3.465709  
40763, 16022, 1386.7552, 3.465554  
40764, 15664, 1386.6933, 3.465399  
40765, 15358, 1386.6314, 3.465244  
40766, 15368, 1386.5694, 3.465090  
40767, 15612, 1386.5075, 3.464935  
40768, 15790, 1386.4456, 3.464780  
40769, 15792, 1386.3837, 3.464625  
40770, 15862, 1386.3217, 3.464471



40771, 16314, 1386.2598, 3.464316  
40772, 17116, 1386.1979, 3.464161  
40773, 17880, 1386.1360, 3.464006  
40774, 18302, 1386.0740, 3.463851  
40775, 18512, 1386.0121, 3.463697  
40776, 18856, 1385.9502, 3.463542  
40777, 19400, 1385.8882, 3.463387  
40778, 19716, 1385.8263, 3.463232  
40779, 19304, 1385.7644, 3.463078  
40780, 18188, 1385.7025, 3.462923  
40781, 16990, 1385.6405, 3.462768  
40782, 16344, 1385.5786, 3.462613  
40783, 16336, 1385.5167, 3.462459  
40784, 16500, 1385.4548, 3.462304  
40785, 16414, 1385.3928, 3.462149  
40786, 16120, 1385.3309, 3.461994  
40787, 15924, 1385.2690, 3.461840  
40788, 15862, 1385.2071, 3.461685  
40789, 15558, 1385.1451, 3.461530  
40790, 14694, 1385.0832, 3.461375  
40791, 13550, 1385.0213, 3.461221  
40792, 12900, 1384.9593, 3.461066  
40793, 13278, 1384.8974, 3.460911  
40794, 14478, 1384.8355, 3.460756  
40795, 15730, 1384.7736, 3.460602  
40796, 16522, 1384.7116, 3.460447  
40797, 16974, 1384.6497, 3.460292  
40798, 17522, 1384.5878, 3.460137  
40799, 18244, 1384.5259, 3.459983  
40800, 18696, 1384.4639, 3.459828  
40801, 18454, 1384.4020, 3.459673  
40802, 17688, 1384.3401, 3.459518  
40803, 17032, 1384.2781, 3.459364  
40804, 16928, 1384.2162, 3.459209  
40805, 17138, 1384.1543, 3.459054  
40806, 17086, 1384.0924, 3.458899  
40807, 16592, 1384.0304, 3.458744  
40808, 16136, 1383.9685, 3.458590  
40809, 16304, 1383.9066, 3.458435  
40810, 17072, 1383.8447, 3.458280  
40811, 17746, 1383.7827, 3.458125  
40812, 17658, 1383.7208, 3.457971  
40813, 16858, 1383.6589, 3.457816  
40814, 15986, 1383.5970, 3.457661  
40815, 15578, 1383.5350, 3.457506  
40816, 15542, 1383.4731, 3.457352  
40817, 15446, 1383.4112, 3.457197  
40818, 15154, 1383.3492, 3.457042  
40819, 15026, 1383.2873, 3.456887  
40820, 15454, 1383.2254, 3.456733  
40821, 16292, 1383.1635, 3.456578  
40822, 16968, 1383.1015, 3.456423  
40823, 17104, 1383.0396, 3.456268  
40824, 16968, 1382.9777, 3.456114  
40825, 17164, 1382.9158, 3.455959  
40826, 17926, 1382.8538, 3.455804  
40827, 18834, 1382.7919, 3.455649  
40828, 19348, 1382.7300, 3.455495  
40829, 19420, 1382.6680, 3.455340  
40830, 19556, 1382.6061, 3.455185  
40831, 20102, 1382.5442, 3.455030  
40832, 20754, 1382.4823, 3.454876  
40833, 20790, 1382.4203, 3.454721  
40834, 19882, 1382.3584, 3.454566  
40835, 18524, 1382.2965, 3.454411  
40836, 17576, 1382.2346, 3.454257  
40837, 17376, 1382.1726, 3.454102  
40838, 17474, 1382.1107, 3.453947  
40839, 17190, 1382.0488, 3.453792  
40840, 16398, 1381.9869, 3.453637  
40841, 15624, 1381.9249, 3.453483  
40842, 15418, 1381.8630, 3.453328  
40843, 15730, 1381.8011, 3.453173  
40844, 16018, 1381.7391, 3.453018  
40845, 15886, 1381.6772, 3.452864  
40846, 15464, 1381.6153, 3.452709

40847, 15158, 1381.5534, 3.452554  
40848, 15080, 1381.4914, 3.452399  
40849, 14972, 1381.4295, 3.452245  
40850, 14658, 1381.3676, 3.452090  
40851, 14398, 1381.3057, 3.451935  
40852, 14726, 1381.2437, 3.451780  
40853, 15794, 1381.1818, 3.451626  
40854, 17120, 1381.1199, 3.451471  
40855, 18030, 1381.0579, 3.451316  
40856, 18350, 1380.9960, 3.451161  
40857, 18526, 1380.9341, 3.451007  
40858, 19044, 1380.8722, 3.450852  
40859, 19828, 1380.8102, 3.450697  
40860, 20302, 1380.7483, 3.450542  
40861, 20078, 1380.6864, 3.450388  
40862, 19382, 1380.6245, 3.450233  
40863, 18810, 1380.5625, 3.450078  
40864, 18628, 1380.5006, 3.449923  
40865, 18518, 1380.4387, 3.449769  
40866, 18028, 1380.3768, 3.449614  
40867, 17226, 1380.3148, 3.449459  
40868, 16718, 1380.2529, 3.449304  
40869, 16992, 1380.1910, 3.449150  
40870, 17858, 1380.1290, 3.448995  
40871, 18570, 1380.0671, 3.448840  
40872, 18596, 1380.0052, 3.448685  
40873, 18054, 1379.9433, 3.448530  
40874, 17476, 1379.8813, 3.448376  
40875, 17156, 1379.8194, 3.448221  
40876, 16902, 1379.7575, 3.448066  
40877, 16438, 1379.6956, 3.447911  
40878, 15878, 1379.6336, 3.447757  
40879, 15674, 1379.5717, 3.447602  
40880, 16082, 1379.5098, 3.447447  
40881, 16786, 1379.4478, 3.447292  
40882, 17198, 1379.3859, 3.447138  
40883, 17092, 1379.3240, 3.446983  
40884, 16842, 1379.2621, 3.446828  
40885, 16972, 1379.2001, 3.446673  
40886, 17524, 1379.1382, 3.446519  
40887, 18002, 1379.0763, 3.446364  
40888, 17934, 1379.0144, 3.446209  
40889, 17366, 1378.9524, 3.446054  
40890, 16788, 1378.8905, 3.445900  
40891, 16550, 1378.8286, 3.445745  
40892, 16484, 1378.7667, 3.445590  
40893, 16204, 1378.7047, 3.445435  
40894, 15608, 1378.6428, 3.445281  
40895, 15028, 1378.5809, 3.445126  
40896, 14856, 1378.5189, 3.444971  
40897, 15066, 1378.4570, 3.444816  
40898, 15278, 1378.3951, 3.444662  
40899, 15208, 1378.3332, 3.444507  
40900, 15012, 1378.2712, 3.444352  
40901, 15082, 1378.2093, 3.444197  
40902, 15592, 1378.1474, 3.444043  
40903, 16344, 1378.0855, 3.443888  
40904, 17040, 1378.0235, 3.443733  
40905, 17632, 1377.9616, 3.443578  
40906, 18288, 1377.8997, 3.443423  
40907, 19006, 1377.8377, 3.443269  
40908, 19482, 1377.7758, 3.443114  
40909, 19386, 1377.7139, 3.442959  
40910, 18754, 1377.6520, 3.442804  
40911, 18004, 1377.5900, 3.442650  
40912, 17458, 1377.5281, 3.442495  
40913, 17020, 1377.4662, 3.442340  
40914, 16356, 1377.4043, 3.442185  
40915, 15430, 1377.3423, 3.442031  
40916, 14750, 1377.2804, 3.441876  
40917, 14888, 1377.2185, 3.441721  
40918, 15840, 1377.1566, 3.441566  
40919, 16928, 1377.0946, 3.441412  
40920, 17416, 1377.0327, 3.441257  
40921, 17200, 1376.9708, 3.441102  
40922, 16820, 1376.9088, 3.440947

40923, 16772, 1376.8469, 3.440793  
40924, 16974, 1376.7850, 3.440638  
40925, 16902, 1376.7231, 3.440483  
40926, 16296, 1376.6611, 3.440328  
40927, 15500, 1376.5992, 3.440174  
40928, 15094, 1376.5373, 3.440019  
40929, 15224, 1376.4754, 3.439864  
40930, 15438, 1376.4134, 3.439709  
40931, 15182, 1376.3515, 3.439555  
40932, 14396, 1376.2896, 3.439400  
40933, 13548, 1376.2277, 3.439245  
40934, 13064, 1376.1657, 3.439090  
40935, 12924, 1376.1038, 3.438936  
40936, 12846, 1376.0419, 3.438781  
40937, 12756, 1375.9799, 3.438626  
40938, 12900, 1375.9180, 3.438471  
40939, 13474, 1375.8561, 3.438316  
40940, 14202, 1375.7942, 3.438162  
40941, 14540, 1375.7322, 3.438007  
40942, 14244, 1375.6703, 3.437852  
40943, 13690, 1375.6084, 3.437697  
40944, 13446, 1375.5465, 3.437543  
40945, 13588, 1375.4845, 3.437388  
40946, 13610, 1375.4226, 3.437233  
40947, 13036, 1375.3607, 3.437078  
40948, 12090, 1375.2987, 3.436924  
40949, 11562, 1375.2368, 3.436769  
40950, 11954, 1375.1749, 3.436614  
40951, 12844, 1375.1130, 3.436459  
40952, 13234, 1375.0510, 3.436305  
40953, 12586, 1374.9891, 3.436150  
40954, 11388, 1374.9272, 3.435995  
40955, 10670, 1374.8653, 3.435840  
40956, 10976, 1374.8033, 3.435686  
40957, 11920, 1374.7414, 3.435531  
40958, 12726, 1374.6795, 3.435376  
40959, 13054, 1374.6176, 3.435221  
40960, 13188, 1374.5556, 3.435067  
40961, 13458, 1374.4937, 3.434912  
40962, 13676, 1374.4318, 3.434757  
40963, 13356, 1374.3698, 3.434602  
40964, 12408, 1374.3079, 3.434448  
40965, 11458, 1374.2460, 3.434293  
40966, 11322, 1374.1841, 3.434138  
40967, 12168, 1374.1221, 3.433983  
40968, 13346, 1374.0602, 3.433828  
40969, 14092, 1373.9983, 3.433674  
40970, 14298, 1373.9364, 3.433519  
40971, 14492, 1373.8744, 3.433364  
40972, 15098, 1373.8125, 3.433209  
40973, 15890, 1373.7506, 3.433055  
40974, 16240, 1373.6886, 3.432900  
40975, 15888, 1373.6267, 3.432745  
40976, 15226, 1373.5648, 3.432590  
40977, 14810, 1373.5029, 3.432436  
40978, 14678, 1373.4409, 3.432281  
40979, 14300, 1373.3790, 3.432126  
40980, 13302, 1373.3171, 3.431971  
40981, 12058, 1373.2552, 3.431817  
40982, 11416, 1373.1932, 3.431662  
40983, 11848, 1373.1313, 3.431507  
40984, 12924, 1373.0694, 3.431352  
40985, 13756, 1373.0075, 3.431198  
40986, 13858, 1372.9455, 3.431043  
40987, 13530, 1372.8836, 3.430888  
40988, 13354, 1372.8217, 3.430733  
40989, 13460, 1372.7597, 3.430579  
40990, 13462, 1372.6978, 3.430424  
40991, 13050, 1372.6359, 3.430269  
40992, 12468, 1372.5740, 3.430114  
40993, 12332, 1372.5120, 3.429960  
40994, 12922, 1372.4501, 3.429805  
40995, 13886, 1372.3882, 3.429650  
40996, 14654, 1372.3263, 3.429495  
40997, 15126, 1372.2643, 3.429341  
40998, 15726, 1372.2024, 3.429186

40999, 16824, 1372.1405, 3.429031  
41000, 18130, 1372.0785, 3.428876  
41001, 18864, 1372.0166, 3.428721  
41002, 18538, 1371.9547, 3.428567  
41003, 17456, 1371.8928, 3.428412  
41004, 16418, 1371.8308, 3.428257  
41005, 15942, 1371.7689, 3.428102  
41006, 15870, 1371.7070, 3.427948  
41007, 15740, 1371.6451, 3.427793  
41008, 15410, 1371.5831, 3.427638  
41009, 15174, 1371.5212, 3.427483  
41010, 15324, 1371.4593, 3.427329  
41011, 15692, 1371.3974, 3.427174  
41012, 15806, 1371.3354, 3.427019  
41013, 15410, 1371.2735, 3.426864  
41014, 14780, 1371.2116, 3.426710  
41015, 14404, 1371.1496, 3.426555  
41016, 14464, 1371.0877, 3.426400  
41017, 14718, 1371.0258, 3.426245  
41018, 14886, 1370.9639, 3.426091  
41019, 15036, 1370.9019, 3.425936  
41020, 15464, 1370.8400, 3.425781  
41021, 16238, 1370.7781, 3.425626  
41022, 16974, 1370.7162, 3.425472  
41023, 17208, 1370.6542, 3.425317  
41024, 16896, 1370.5923, 3.425162  
41025, 16482, 1370.5304, 3.425007  
41026, 16370, 1370.4684, 3.424853  
41027, 16448, 1370.4065, 3.424698  
41028, 16208, 1370.3446, 3.424543  
41029, 15334, 1370.2827, 3.424388  
41030, 14140, 1370.2207, 3.424234  
41031, 13274, 1370.1588, 3.424079  
41032, 13116, 1370.0969, 3.423924  
41033, 13470, 1370.0350, 3.423769  
41034, 13894, 1369.9730, 3.423614  
41035, 14228, 1369.9111, 3.423460  
41036, 14704, 1369.8492, 3.423305  
41037, 15544, 1369.7873, 3.423150  
41038, 16604, 1369.7253, 3.422995  
41039, 17482, 1369.6634, 3.422841  
41040, 17942, 1369.6015, 3.422686  
41041, 18122, 1369.5395, 3.422531  
41042, 18274, 1369.4776, 3.422376  
41043, 18364, 1369.4157, 3.422222  
41044, 18082, 1369.3538, 3.422067  
41045, 17298, 1369.2918, 3.421912  
41046, 16374, 1369.2299, 3.421757  
41047, 15916, 1369.1680, 3.421603  
41048, 16174, 1369.1061, 3.421448  
41049, 16758, 1369.0441, 3.421293  
41050, 17008, 1368.9822, 3.421138  
41051, 16598, 1368.9203, 3.420984  
41052, 15844, 1368.8583, 3.420829  
41053, 15270, 1368.7964, 3.420674  
41054, 15114, 1368.7345, 3.420519  
41055, 15172, 1368.6726, 3.420365  
41056, 15162, 1368.6106, 3.420210  
41057, 15060, 1368.5487, 3.420055  
41058, 15070, 1368.4868, 3.419900  
41059, 15266, 1368.4249, 3.419746  
41060, 15490, 1368.3629, 3.419591  
41061, 15560, 1368.3010, 3.419436  
41062, 15570, 1368.2391, 3.419281  
41063, 15834, 1368.1772, 3.419127  
41064, 16528, 1368.1152, 3.418972  
41065, 17446, 1368.0533, 3.418817  
41066, 18182, 1367.9914, 3.418662  
41067, 18516, 1367.9294, 3.418507  
41068, 18578, 1367.8675, 3.418353  
41069, 18564, 1367.8056, 3.418198  
41070, 18468, 1367.7437, 3.418043  
41071, 18090, 1367.6817, 3.417888  
41072, 17404, 1367.6198, 3.417734  
41073, 16734, 1367.5579, 3.417579  
41074, 16448, 1367.4960, 3.417424  
41075, 16544, 1367.4340, 3.417269  
41076, 16592, 1367.3721, 3.417115  
41077, 16192, 1367.3102, 3.416960  
41078, 15424, 1367.2482, 3.416805  
41079, 14798, 1367.1863, 3.416650  
41080, 14738, 1367.1244, 3.416496  
41081, 15156, 1367.0625, 3.416341  
41082, 15646, 1367.0005, 3.416186  
41083, 16004, 1366.9386, 3.416031  
41084, 16454, 1366.8767, 3.415877  
41085, 17324, 1366.8148, 3.415722  
41086, 18486, 1366.7529, 3.415567  
41087, 19362, 1366.6909, 3.415412  
41088, 19454, 1366.6290, 3.415258  
41089, 18852, 1366.5671, 3.415103  
41090, 18124, 1366.5051, 3.414948  
41091, 17722, 1366.4432, 3.414793  
41092, 17524, 1366.3813, 3.414639  
41093, 17072, 1366.3193, 3.414484  
41094, 16150, 1366.2574, 3.414329  
41095, 15076, 1366.1955, 3.414174  
41096, 14318, 1366.1336, 3.414020  
41097, 14014, 1366.0716, 3.413865  
41098, 13860, 1366.0097, 3.413710  
41099, 13574, 1365.9478, 3.413555  
41100, 13260, 1365.8859, 3.413400  
41101, 13302, 1365.8239, 3.413246  
41102, 13858, 1365.7620, 3.413091  
41103, 14612, 1365.7001, 3.412936  
41104, 15072, 1365.6381, 3.412781  
41105, 15094, 1365.5762, 3.412627  
41106, 14974, 1365.5143, 3.412472  
41107, 15050, 1365.4524, 3.412317  
41108, 15316, 1365.3904, 3.412162  
41109, 15456, 1365.3285, 3.412008  
41110, 15284, 1365.2666, 3.411853  
41111, 14962, 1365.2047, 3.411698  
41112, 14764, 1365.1427, 3.411543  
41113, 14666, 1365.0808, 3.411389  
41114, 14380, 1365.0189, 3.411234  
41115, 13792, 1364.9570, 3.411079  
41116, 13290, 1364.8950, 3.410924  
41117, 13476, 1364.8331, 3.410770  
41118, 14516, 1364.7712, 3.410615  
41119, 15890, 1364.7092, 3.410460  
41120, 16836, 1364.6473, 3.410305  
41121, 17088, 1364.5854, 3.410151  
41122, 17092, 1364.5235, 3.409996  
41123, 17368, 1364.4615, 3.409841  
41124, 17850, 1364.3996, 3.409686  
41125, 17900, 1364.3377, 3.409532  
41126, 17044, 1364.2758, 3.409377  
41127, 15616, 1364.2138, 3.409222  
41128, 14546, 1364.1519, 3.409067  
41129, 14480, 1364.0900, 3.408913  
41130, 15194, 1364.0281, 3.408758  
41131, 15910, 1363.9661, 3.408603  
41132, 16108, 1363.9042, 3.408448  
41133, 15982, 1363.8423, 3.408293  
41134, 16074, 1363.7803, 3.408139  
41135, 16614, 1363.7184, 3.407984  
41136, 17304, 1363.6565, 3.407829  
41137, 17764, 1363.5946, 3.407674  
41138, 17974, 1363.5326, 3.407520  
41139, 18200, 1363.4707, 3.407365  
41140, 18510, 1363.4088, 3.407210  
41141, 18534, 1363.3469, 3.407055  
41142, 17868, 1363.2849, 3.406901  
41143, 16608, 1363.2230, 3.406746  
41144, 15424, 1363.1611, 3.406591  
41145, 14952, 1363.0991, 3.406436  
41146, 15162, 1363.0372, 3.406282  
41147, 15400, 1362.9753, 3.406127  
41148, 15048, 1362.9134, 3.405972  
41149, 14124, 1362.8514, 3.405817  
41150, 13186, 1362.7895, 3.405663  
41151, 12730, 1362.7276, 3.405508  
41152, 12772, 1362.6657, 3.405353  
41153, 13014, 1362.6037, 3.405198  
41154, 13278, 1362.5418, 3.405044  
41155, 13672, 1362.4799, 3.404889  
41156, 14318, 1362.4180, 3.404734  
41157, 15026, 1362.3560, 3.404579  
41158, 15370, 1362.2941, 3.404425  
41159, 15120, 1362.2322, 3.404270  
41160, 14528, 1362.1702, 3.404115  
41161, 14106, 1362.1083, 3.403960  
41162, 14202, 1362.0464, 3.403806  
41163, 14776, 1361.9845, 3.403651  
41164, 15558, 1361.9225, 3.403496  
41165, 16322, 1361.8606, 3.403341  
41166, 16954, 1361.7987, 3.403186  
41167, 17328, 1361.7368, 3.403032  
41168, 17312, 1361.6748, 3.402877  
41169, 16920, 1361.6129, 3.402722  
41170, 16478, 1361.5510, 3.402567  
41171, 16370, 1361.4890, 3.402413  
41172, 16710, 1361.4271, 3.402258  
41173, 17160, 1361.3652, 3.402103  
41174, 17232, 1361.3033, 3.401948  
41175, 16754, 1361.2413, 3.401794  
41176, 15960, 1361.1794, 3.401639  
41177, 15174, 1361.1175, 3.401484  
41178, 14468, 1361.0556, 3.401329  
41179, 13720, 1360.9936, 3.401175  
41180, 12998, 1360.9317, 3.401020  
41181, 12708, 1360.8698, 3.400865  
41182, 13210, 1360.8079, 3.400710  
41183, 14292, 1360.7459, 3.400556  
41184, 15138, 1360.6840, 3.400401  
41185, 15010, 1360.6221, 3.400246  
41186, 13928, 1360.5601, 3.400091  
41187, 12662, 1360.4982, 3.399937  
41188, 11980, 1360.4363, 3.399782  
41189, 11908, 1360.3744, 3.399627  
41190, 11858, 1360.3124, 3.399472  
41191, 11352, 1360.2505, 3.399318  
41192, 10622, 1360.1886, 3.399163  
41193, 10352, 1360.1267, 3.399008  
41194, 10924, 1360.0647, 3.398853  
41195, 12004, 1360.0028, 3.398699  
41196, 12910, 1359.9409, 3.398544  
41197, 13340, 1359.8789, 3.398389  
41198, 13552, 1359.8170, 3.398234  
41199, 13960, 1359.7551, 3.398079  
41200, 14546, 1359.6932, 3.397925  
41201, 14908, 1359.6312, 3.397770  
41202, 14770, 1359.5693, 3.397615  
41203, 14336, 1359.5074, 3.397460  
41204, 14072, 1359.4455, 3.397306  
41205, 14154, 1359.3835, 3.397151  
41206, 14276, 1359.3216, 3.396996  
41207, 14090, 1359.2597, 3.396841  
41208, 13694, 1359.1978, 3.396687  
41209, 13604, 1359.1358, 3.396532  
41210, 14216, 1359.0739, 3.396377  
41211, 15322, 1359.0120, 3.396222  
41212, 16326, 1358.9500, 3.396068  
41213, 16854, 1358.8881, 3.395913  
41214, 17066, 1358.8262, 3.395758  
41215, 17368, 1358.7643, 3.395603  
41216, 17850, 1358.7023, 3.395449  
41217, 18160, 1358.6404, 3.395294  
41218, 17930, 1358.5785, 3.395139  
41219, 17252, 1358.5166, 3.394984  
41220, 16604, 1358.4546, 3.394830  
41221, 16388, 1358.3927, 3.394675  
41222, 16540, 1358.3308, 3.394520  
41223, 16734, 1358.2688, 3.394365  
41224, 16786, 1358.2069, 3.394211  
41225, 16836, 1358.1450, 3.394056  
41226, 17038, 1358.0831, 3.393901

41227, 17246, 1358.0211, 3.393746  
41228, 17146, 1357.9592, 3.393592  
41229, 16652, 1357.8973, 3.393437  
41230, 16138, 1357.8354, 3.393282  
41231, 16068, 1357.7734, 3.393127  
41232, 16492, 1357.7115, 3.392972  
41233, 16978, 1357.6496, 3.392818  
41234, 17088, 1357.5877, 3.392663  
41235, 16894, 1357.5257, 3.392508  
41236, 16844, 1357.4638, 3.392353  
41237, 17202, 1357.4019, 3.392199  
41238, 17668, 1357.3399, 3.392044  
41239, 17660, 1357.2780, 3.391889  
41240, 16970, 1357.2161, 3.391734  
41241, 16044, 1357.1542, 3.391580  
41242, 15518, 1357.0922, 3.391425  
41243, 15560, 1357.0303, 3.391270  
41244, 15744, 1356.9684, 3.391115  
41245, 15620, 1356.9065, 3.390961  
41246, 15230, 1356.8445, 3.390806  
41247, 15050, 1356.7826, 3.390651  
41248, 15396, 1356.7207, 3.390496  
41249, 15992, 1356.6587, 3.390342  
41250, 16262, 1356.5968, 3.390187  
41251, 15944, 1356.5349, 3.390032  
41252, 15368, 1356.4730, 3.389877  
41253, 15048, 1356.4110, 3.389723  
41254, 15100, 1356.3491, 3.389568  
41255, 15200, 1356.2872, 3.389413  
41256, 15030, 1356.2253, 3.389258  
41257, 14724, 1356.1633, 3.389104  
41258, 14676, 1356.1014, 3.388949  
41259, 15020, 1356.0395, 3.388794  
41260, 15352, 1355.9776, 3.388639  
41261, 15132, 1355.9156, 3.388484  
41262, 14276, 1355.8537, 3.388330  
41263, 13298, 1355.7918, 3.388175  
41264, 12808, 1355.7298, 3.388020  
41265, 12932, 1355.6679, 3.387865  
41266, 13256, 1355.6060, 3.387711  
41267, 13336, 1355.5441, 3.387556  
41268, 13160, 1355.4821, 3.387401  
41269, 13062, 1355.4202, 3.387246  
41270, 13282, 1355.3583, 3.387092  
41271, 13718, 1355.2964, 3.386937  
41272, 14116, 1355.2344, 3.386782  
41273, 14416, 1355.1725, 3.386627  
41274, 14768, 1355.1106, 3.386473  
41275, 15272, 1355.0486, 3.386318  
41276, 15782, 1354.9867, 3.386163  
41277, 16064, 1354.9248, 3.386008  
41278, 16112, 1354.8629, 3.385854  
41279, 16210, 1354.8009, 3.385699  
41280, 16562, 1354.7390, 3.385544  
41281, 17032, 1354.6771, 3.385389  
41282, 17244, 1354.6152, 3.385235  
41283, 17026, 1354.5532, 3.385080  
41284, 16628, 1354.4913, 3.384925  
41285, 16442, 1354.4294, 3.384770  
41286, 16552, 1354.3675, 3.384616  
41287, 16600, 1354.3055, 3.384461  
41288, 16246, 1354.2436, 3.384306  
41289, 15554, 1354.1817, 3.384151  
41290, 14964, 1354.1197, 3.383997  
41291, 14762, 1354.0578, 3.383842  
41292, 14782, 1353.9959, 3.383687  
41293, 14642, 1353.9340, 3.383532  
41294, 14260, 1353.8720, 3.383377  
41295, 14016, 1353.8101, 3.383223  
41296, 14294, 1353.7482, 3.383068  
41297, 14976, 1353.6863, 3.382913  
41298, 15494, 1353.6243, 3.382758  
41299, 15430, 1353.5624, 3.382604  
41300, 14970, 1353.5005, 3.382449  
41301, 14668, 1353.4385, 3.382294  
41302, 14800, 1353.3766, 3.382139  
41303, 15012, 1353.3147, 3.381985  
41304, 14746, 1353.2528, 3.381830  
41305, 13934, 1353.1908, 3.381675  
41306, 13136, 1353.1289, 3.381520  
41307, 12982, 1353.0670, 3.381366  
41308, 13496, 1353.0051, 3.381211  
41309, 14090, 1352.9431, 3.381056  
41310, 14240, 1352.8812, 3.380901  
41311, 14022, 1352.8193, 3.380747  
41312, 13936, 1352.7574, 3.380592  
41313, 14260, 1352.6954, 3.380437  
41314, 14702, 1352.6335, 3.380282  
41315, 14772, 1352.5716, 3.380128  
41316, 14406, 1352.5096, 3.379973  
41317, 14072, 1352.4477, 3.379818  
41318, 14240, 1352.3858, 3.379663  
41319, 14824, 1352.3239, 3.379509  
41320, 15268, 1352.2619, 3.379354  
41321, 15134, 1352.2000, 3.379199  
41322, 14554, 1352.1381, 3.379044  
41323, 14016, 1352.0762, 3.378890  
41324, 13794, 1352.0142, 3.378735  
41325, 13724, 1351.9523, 3.378580  
41326, 13560, 1351.8904, 3.378425  
41327, 13374, 1351.8284, 3.378270  
41328, 13490, 1351.7665, 3.378116  
41329, 14006, 1351.7046, 3.377961  
41330, 14532, 1351.6427, 3.377806  
41331, 14564, 1351.5807, 3.377651  
41332, 14092, 1351.5188, 3.377497  
41333, 13674, 1351.4569, 3.377342  
41334, 13890, 1351.3950, 3.377187  
41335, 14656, 1351.3330, 3.377032  
41336, 15296, 1351.2711, 3.376878  
41337, 15256, 1351.2092, 3.376723  
41338, 14668, 1351.1473, 3.376568  
41339, 14204, 1351.0853, 3.376413  
41340, 14314, 1351.0234, 3.376259  
41341, 14786, 1350.9615, 3.376104  
41342, 15076, 1350.8995, 3.375949  
41343, 14970, 1350.8376, 3.375794  
41344, 14796, 1350.7757, 3.375640  
41345, 14950, 1350.7138, 3.375485  
41346, 15364, 1350.6518, 3.375330  
41347, 15592, 1350.5899, 3.375175  
41348, 15374, 1350.5280, 3.375021  
41349, 15028, 1350.4661, 3.374866  
41350, 15088, 1350.4041, 3.374711  
41351, 15664, 1350.3422, 3.374556  
41352, 16294, 1350.2803, 3.374402  
41353, 16464, 1350.2184, 3.374247  
41354, 16240, 1350.1564, 3.374092  
41355, 16188, 1350.0945, 3.373937  
41356, 16664, 1350.0326, 3.373783  
41357, 17294, 1349.9706, 3.373628  
41358, 17306, 1349.9087, 3.373473  
41359, 16386, 1349.8468, 3.373318  
41360, 15092, 1349.7849, 3.373163  
41361, 14344, 1349.7229, 3.373009  
41362, 14530, 1349.6610, 3.372854  
41363, 15180, 1349.5991, 3.372699  
41364, 15582, 1349.5372, 3.372544  
41365, 15514, 1349.4752, 3.372390  
41366, 15362, 1349.4133, 3.372235  
41367, 15520, 1349.3514, 3.372080  
41368, 15870, 1349.2894, 3.371925  
41369, 15936, 1349.2275, 3.371771  
41370, 15522, 1349.1656, 3.371616  
41371, 14976, 1349.1037, 3.371461  
41372, 14786, 1349.0417, 3.371306  
41373, 14982, 1348.9798, 3.371152  
41374, 15080, 1348.9179, 3.370997  
41375, 14662, 1348.8560, 3.370842  
41376, 13886, 1348.7940, 3.370687  
41377, 13322, 1348.7321, 3.370533  
41378, 13318, 1348.6702, 3.370378  
41379, 13630, 1348.6083, 3.370223  
41380, 13752, 1348.5463, 3.370068  
41381, 13536, 1348.4844, 3.369914  
41382, 13314, 1348.4225, 3.369759  
41383, 13430, 1348.3605, 3.369604  
41384, 13744, 1348.2986, 3.369449  
41385, 13752, 1348.2367, 3.369295  
41386, 13188, 1348.1748, 3.369140  
41387, 12358, 1348.1128, 3.368985  
41388, 11790, 1348.0509, 3.368830  
41389, 11618, 1347.9890, 3.368676  
41390, 11448, 1347.9271, 3.368521  
41391, 10888, 1347.8651, 3.368366  
41392, 10118, 1347.8032, 3.368211  
41393, 9722, 1347.7413, 3.368056  
41394, 10046, 1347.6793, 3.367902  
41395, 10716, 1347.6174, 3.367747  
41396, 11028, 1347.5555, 3.367592  
41397, 10754, 1347.4936, 3.367437  
41398, 10406, 1347.4316, 3.367283  
41399, 10706, 1347.3697, 3.367128  
41400, 11798, 1347.3078, 3.366973  
41401, 13082, 1347.2459, 3.366818  
41402, 13934, 1347.1839, 3.366664  
41403, 14342, 1347.1220, 3.366509  
41404, 14816, 1347.0601, 3.366354  
41405, 15690, 1346.9982, 3.366199  
41406, 16666, 1346.9362, 3.366045  
41407, 17154, 1346.8743, 3.365890  
41408, 16976, 1346.8124, 3.365735  
41409, 16560, 1346.7504, 3.365580  
41410, 16414, 1346.6885, 3.365426  
41411, 16492, 1346.6266, 3.365271  
41412, 16284, 1346.5647, 3.365116  
41413, 15472, 1346.5027, 3.364961  
41414, 14462, 1346.4408, 3.364807  
41415, 13962, 1346.3789, 3.364652  
41416, 14234, 1346.3170, 3.364497  
41417, 14744, 1346.2550, 3.364342  
41418, 14772, 1346.1931, 3.364188  
41419, 14216, 1346.1312, 3.364033  
41420, 13732, 1346.0692, 3.363878  
41421, 13942, 1346.0073, 3.363723  
41422, 14722, 1345.9454, 3.363569  
41423, 15306, 1345.8835, 3.363414  
41424, 15128, 1345.8215, 3.363259  
41425, 14452, 1345.7596, 3.363104  
41426, 14038, 1345.6977, 3.362949  
41427, 14270, 1345.6358, 3.362795  
41428, 14770, 1345.5738, 3.362640  
41429, 14834, 1345.5119, 3.362485  
41430, 14232, 1345.4500, 3.362330  
41431, 13426, 1345.3881, 3.362176  
41432, 12970, 1345.3261, 3.362021  
41433, 12928, 1345.2642, 3.361866  
41434, 12914, 1345.2023, 3.361711  
41435, 12704, 1345.1403, 3.361557  
41436, 12572, 1345.0784, 3.361402  
41437, 12952, 1345.0165, 3.361247  
41438, 13820, 1344.9546, 3.361092  
41439, 14580, 1344.8926, 3.360938  
41440, 14624, 1344.8307, 3.360783  
41441, 13982, 1344.7688, 3.360628  
41442, 13272, 1344.7069, 3.360473  
41443, 13080, 1344.6449, 3.360319  
41444, 13440, 1344.5830, 3.360164  
41445, 14018, 1344.5211, 3.360009  
41446, 14628, 1344.4591, 3.359854  
41447, 15436, 1344.3972, 3.359700  
41448, 16592, 1344.3353, 3.359545  
41449, 17768, 1344.2734, 3.359390  
41450, 18328, 1344.2114, 3.359235  
41451, 17928, 1344.1495, 3.359081  
41452, 16970, 1344.0876, 3.358926  
41453, 16248, 1344.0257, 3.358771  
41454, 16180, 1343.9637, 3.358616

41455, 16480, 1343.9018, 3.358462  
41456, 16532, 1343.8399, 3.358307  
41457, 16092, 1343.7780, 3.358152  
41458, 15462, 1343.7160, 3.357997  
41459, 15046, 1343.6541, 3.357842  
41460, 14842, 1343.5922, 3.357688  
41461, 14556, 1343.5302, 3.357533  
41462, 14130, 1343.4683, 3.357378  
41463, 13976, 1343.4064, 3.357223  
41464, 14540, 1343.3445, 3.357069  
41465, 15688, 1343.2825, 3.356914  
41466, 16644, 1343.2206, 3.356759  
41467, 16662, 1343.1587, 3.356604  
41468, 15740, 1343.0968, 3.356450  
41469, 14620, 1343.0348, 3.356295  
41470, 14056, 1342.9729, 3.356140  
41471, 14178, 1342.9110, 3.355985  
41472, 14568, 1342.8490, 3.355831  
41473, 14864, 1342.7871, 3.355676  
41474, 15140, 1342.7252, 3.355521  
41475, 15668, 1342.6633, 3.355366  
41476, 16438, 1342.6013, 3.355212  
41477, 17084, 1342.5394, 3.355057  
41478, 17312, 1342.4775, 3.354902  
41479, 17248, 1342.4156, 3.354747  
41480, 17248, 1342.3536, 3.354593  
41481, 17352, 1342.2917, 3.354438  
41482, 17114, 1342.2298, 3.354283  
41483, 16060, 1342.1679, 3.354128  
41484, 14330, 1342.1059, 3.353974  
41485, 12718, 1342.0440, 3.353819  
41486, 12028, 1341.9821, 3.353664  
41487, 12410, 1341.9201, 3.353509  
41488, 13322, 1341.8582, 3.353355  
41489, 14170, 1341.7963, 3.353200  
41490, 14846, 1341.7344, 3.353045  
41491, 15592, 1341.6724, 3.352890  
41492, 16500, 1341.6105, 3.352735  
41493, 17262, 1341.5486, 3.352581  
41494, 17498, 1341.4867, 3.352426  
41495, 17238, 1341.4247, 3.352271  
41496, 16920, 1341.3628, 3.352116  
41497, 16908, 1341.3009, 3.351962  
41498, 17112, 1341.2389, 3.351807  
41499, 17134, 1341.1770, 3.351652  
41500, 16756, 1341.1151, 3.351497  
41501, 16206, 1341.0532, 3.351343  
41502, 15824, 1340.9912, 3.351188  
41503, 15618, 1340.9293, 3.351033  
41504, 15260, 1340.8674, 3.350878  
41505, 14520, 1340.8055, 3.350724  
41506, 13648, 1340.7435, 3.350569  
41507, 13138, 1340.6816, 3.350414  
41508, 13212, 1340.6197, 3.350259  
41509, 13570, 1340.5578, 3.350105  
41510, 13738, 1340.4958, 3.349950  
41511, 13616, 1340.4339, 3.349795  
41512, 13542, 1340.3720, 3.349640  
41513, 13812, 1340.3100, 3.349486  
41514, 14274, 1340.2481, 3.349331  
41515, 14484, 1340.1862, 3.349176  
41516, 14274, 1340.1243, 3.349021  
41517, 14026, 1340.0623, 3.348867  
41518, 14246, 1340.0004, 3.348712  
41519, 14966, 1339.9385, 3.348557  
41520, 15630, 1339.8766, 3.348402  
41521, 15714, 1339.8146, 3.348248  
41522, 15322, 1339.7527, 3.348093  
41523, 15108, 1339.6908, 3.347938  
41524, 15540, 1339.6288, 3.347783  
41525, 16346, 1339.5669, 3.347628  
41526, 16794, 1339.5050, 3.347474  
41527, 16486, 1339.4431, 3.347319  
41528, 15794, 1339.3811, 3.347164  
41529, 15452, 1339.3192, 3.347009  
41530, 15778, 1339.2573, 3.346855  
41531, 16382, 1339.1954, 3.346700  
41532, 16600, 1339.1334, 3.346545  
41533, 16164, 1339.0715, 3.346390  
41534, 15342, 1339.0096, 3.346236  
41535, 14526, 1338.9477, 3.346081  
41536, 13820, 1338.8857, 3.345926  
41537, 13142, 1338.8238, 3.345771  
41538, 12564, 1338.7619, 3.345617  
41539, 12402, 1338.6999, 3.345462  
41540, 12798, 1338.6380, 3.345307  
41541, 13392, 1338.5761, 3.345152  
41542, 13498, 1338.5142, 3.344998  
41543, 12810, 1338.4522, 3.344843  
41544, 11742, 1338.3903, 3.344688  
41545, 11106, 1338.3284, 3.344533  
41546, 11316, 1338.2665, 3.344379  
41547, 12060, 1338.2045, 3.344224  
41548, 12642, 1338.1426, 3.344069  
41549, 12702, 1338.0807, 3.343914  
41550, 12462, 1338.0187, 3.343760  
41551, 12330, 1337.9568, 3.343605  
41552, 12424, 1337.8949, 3.343450  
41553, 12514, 1337.8330, 3.343295  
41554, 12402, 1337.7710, 3.343140  
41555, 12176, 1337.7091, 3.342986  
41556, 12018, 1337.6472, 3.342831  
41557, 11882, 1337.5853, 3.342676  
41558, 11546, 1337.5233, 3.342521  
41559, 10988, 1337.4614, 3.342367  
41560, 10612, 1337.3995, 3.342212  
41561, 10902, 1337.3376, 3.342057  
41562, 11824, 1337.2756, 3.341902  
41563, 12686, 1337.2137, 3.341748  
41564, 12754, 1337.1518, 3.341593  
41565, 12002, 1337.0898, 3.341438  
41566, 11176, 1337.0279, 3.341283  
41567, 11102, 1336.9660, 3.341129  
41568, 11884, 1336.9041, 3.340974  
41569, 12898, 1336.8421, 3.340819  
41570, 13536, 1336.7802, 3.340664  
41571, 13788, 1336.7183, 3.340510  
41572, 14162, 1336.6564, 3.340355  
41573, 14954, 1336.5944, 3.340200  
41574, 15912, 1336.5325, 3.340045  
41575, 16556, 1336.4706, 3.339891  
41576, 16792, 1336.4087, 3.339736  
41577, 16966, 1336.3467, 3.339581  
41578, 17358, 1336.2848, 3.339426  
41579, 17668, 1336.2229, 3.339272  
41580, 17270, 1336.1609, 3.339117  
41581, 15938, 1336.0990, 3.338962  
41582, 14270, 1336.0371, 3.338807  
41583, 13222, 1335.9752, 3.338653  
41584, 13236, 1335.9132, 3.338498  
41585, 13868, 1335.8513, 3.338343  
41586, 14310, 1335.7894, 3.338188  
41587, 14196, 1335.7275, 3.338033  
41588, 13860, 1335.6655, 3.337879  
41589, 13784, 1335.6036, 3.337724  
41590, 14006, 1335.5417, 3.337569  
41591, 14130, 1335.4797, 3.337414  
41592, 13858, 1335.4178, 3.337260  
41593, 13386, 1335.3559, 3.337105  
41594, 13180, 1335.2940, 3.336950  
41595, 13406, 1335.2320, 3.336795  
41596, 13766, 1335.1701, 3.336641  
41597, 13862, 1335.1082, 3.336486  
41598, 13670, 1335.0463, 3.336331  
41599, 13530, 1334.9843, 3.336176  
41600, 13714, 1334.9224, 3.336022  
41601, 14076, 1334.8605, 3.335867  
41602, 14264, 1334.7986, 3.335712  
41603, 14162, 1334.7366, 3.335557  
41604, 14018, 1334.6747, 3.335403  
41605, 14134, 1334.6128, 3.335248  
41606, 14448, 1334.5508, 3.335093  
41607, 14640, 1334.4889, 3.334938  
41608, 14550, 1334.4270, 3.334784  
41609, 14428, 1334.3651, 3.334629  
41610, 14590, 1334.3031, 3.334474  
41611, 14974, 1334.2412, 3.334319  
41612, 15110, 1334.1793, 3.334165  
41613, 14648, 1334.1174, 3.334010  
41614, 13868, 1334.0554, 3.333855  
41615, 13504, 1333.9935, 3.333700  
41616, 14024, 1333.9316, 3.333546  
41617, 15136, 1333.8696, 3.333391  
41618, 16062, 1333.8077, 3.333236  
41619, 16340, 1333.7458, 3.333081  
41620, 16200, 1333.6839, 3.332926  
41621, 16184, 1333.6219, 3.332772  
41622, 16452, 1333.5600, 3.332617  
41623, 16584, 1333.4981, 3.332462  
41624, 16108, 1333.4362, 3.332307  
41625, 15096, 1333.3742, 3.332153  
41626, 14152, 1333.3123, 3.331998  
41627, 13764, 1333.2504, 3.331843  
41628, 13818, 1333.1885, 3.331688  
41629, 13748, 1333.1265, 3.331534  
41630, 13202, 1333.0646, 3.331379  
41631, 12392, 1333.0027, 3.331224  
41632, 11828, 1332.9407, 3.331069  
41633, 11790, 1332.8788, 3.330915  
41634, 12140, 1332.8169, 3.330760  
41635, 12634, 1332.7550, 3.330605  
41636, 13252, 1332.6930, 3.330450  
41637, 14094, 1332.6311, 3.330296  
41638, 15062, 1332.5692, 3.330141  
41639, 15776, 1332.5073, 3.329986  
41640, 15918, 1332.4453, 3.329831  
41641, 15638, 1332.3834, 3.329677  
41642, 15422, 1332.3215, 3.329522  
41643, 15580, 1332.2595, 3.329367  
41644, 15872, 1332.1976, 3.329212  
41645, 15780, 1332.1357, 3.329058  
41646, 15106, 1332.0738, 3.328903  
41647, 14218, 1332.0118, 3.328748  
41648, 13652, 1331.9499, 3.328593  
41649, 13544, 1331.8880, 3.328439  
41650, 13562, 1331.8261, 3.328284  
41651, 13418, 1331.7641, 3.328129  
41652, 13262, 1331.7022, 3.327974  
41653, 13504, 1331.6403, 3.327819  
41654, 14210, 1331.5784, 3.327665  
41655, 14882, 1331.5164, 3.327510  
41656, 14918, 1331.4545, 3.327355  
41657, 14324, 1331.3926, 3.327200  
41658, 13754, 1331.3306, 3.327046  
41659, 13828, 1331.2687, 3.326891  
41660, 14418, 1331.2068, 3.326736  
41661, 14758, 1331.1449, 3.326581  
41662, 14298, 1331.0829, 3.326427  
41663, 13330, 1331.0210, 3.326272  
41664, 12740, 1330.9591, 3.326117  
41665, 13094, 1330.8972, 3.325962  
41666, 14088, 1330.8352, 3.325808  
41667, 14964, 1330.7733, 3.325653  
41668, 15324, 1330.7114, 3.325498  
41669, 15498, 1330.6494, 3.325343  
41670, 16022, 1330.5875, 3.325189  
41671, 16966, 1330.5256, 3.325034  
41672, 17822, 1330.4637, 3.324879  
41673, 18096, 1330.4017, 3.324724  
41674, 17848, 1330.3398, 3.324570  
41675, 17546, 1330.2779, 3.324415  
41676, 17460, 1330.2160, 3.324260  
41677, 17376, 1330.1540, 3.324105  
41678, 16926, 1330.0921, 3.323951  
41679, 16170, 1330.0302, 3.323796  
41680, 15634, 1329.9683, 3.323641  
41681, 15808, 1329.9063, 3.323486  
41682, 16612, 1329.8444, 3.323332

41683, 17502, 1329.7825, 3.323177  
41684, 18030, 1329.7205, 3.323022  
41685, 18214, 1329.6586, 3.322867  
41686, 18320, 1329.5967, 3.322712  
41687, 18384, 1329.5348, 3.322558  
41688, 18148, 1329.4728, 3.322403  
41689, 17492, 1329.4109, 3.322248  
41690, 16756, 1329.3490, 3.322093  
41691, 16480, 1329.2871, 3.321939  
41692, 16782, 1329.2251, 3.321784  
41693, 17104, 1329.1632, 3.321629  
41694, 16748, 1329.1013, 3.321474  
41695, 15636, 1329.0393, 3.321320  
41696, 14504, 1328.9774, 3.321165  
41697, 14174, 1328.9155, 3.321010  
41698, 14752, 1328.8536, 3.320855  
41699, 15518, 1328.7916, 3.320701  
41700, 15662, 1328.7297, 3.320546  
41701, 15040, 1328.6678, 3.320391  
41702, 14172, 1328.6059, 3.320236  
41703, 13600, 1328.5439, 3.320082  
41704, 13392, 1328.4820, 3.319927  
41705, 13298, 1328.4201, 3.319772  
41706, 13264, 1328.3582, 3.319617  
41707, 13602, 1328.2962, 3.319463  
41708, 14576, 1328.2343, 3.319308  
41709, 15918, 1328.1724, 3.319153  
41710, 16916, 1328.1104, 3.318998  
41711, 17052, 1328.0485, 3.318844  
41712, 16442, 1327.9866, 3.318689  
41713, 15652, 1327.9247, 3.318534  
41714, 15114, 1327.8627, 3.318379  
41715, 14794, 1327.8008, 3.318225  
41716, 14466, 1327.7389, 3.318070  
41717, 14152, 1327.6770, 3.317915  
41718, 14168, 1327.6150, 3.317760  
41719, 14670, 1327.5531, 3.317605  
41720, 15346, 1327.4912, 3.317451  
41721, 15614, 1327.4292, 3.317296  
41722, 15232, 1327.3673, 3.317141  
41723, 14508, 1327.3054, 3.316986  
41724, 13962, 1327.2435, 3.316832  
41725, 13808, 1327.1815, 3.316677  
41726, 13780, 1327.1196, 3.316522  
41727, 13568, 1327.0577, 3.316367  
41728, 13220, 1326.9958, 3.316213  
41729, 13046, 1326.9338, 3.316058  
41730, 13168, 1326.8719, 3.315903  
41731, 13306, 1326.8100, 3.315748  
41732, 13092, 1326.7481, 3.315594  
41733, 12580, 1326.6861, 3.315439  
41734, 12282, 1326.6242, 3.315284  
41735, 12622, 1326.5623, 3.315129  
41736, 13434, 1326.5003, 3.314975  
41737, 14054, 1326.4384, 3.314820  
41738, 13966, 1326.3765, 3.314665  
41739, 13292, 1326.3146, 3.314510  
41740, 12634, 1326.2526, 3.314356  
41741, 12442, 1326.1907, 3.314201  
41742, 12658, 1326.1288, 3.314046  
41743, 12936, 1326.0669, 3.313891  
41744, 13102, 1326.0049, 3.313737  
41745, 13300, 1325.9430, 3.313582  
41746, 13674, 1325.8811, 3.313427  
41747, 14072, 1325.8191, 3.313272  
41748, 14196, 1325.7572, 3.313118  
41749, 13962, 1325.6953, 3.312963  
41750, 13686, 1325.6334, 3.312808  
41751, 13742, 1325.5714, 3.312653  
41752, 14130, 1325.5095, 3.312498  
41753, 14472, 1325.4476, 3.312344  
41754, 14442, 1325.3857, 3.312189  
41755, 14122, 1325.3237, 3.312034  
41756, 13856, 1325.2618, 3.311879  
41757, 13790, 1325.1999, 3.311725  
41758, 13682, 1325.1380, 3.311570

41759, 13244, 1325.0760, 3.311415  
41760, 12590, 1325.0141, 3.311260  
41761, 12230, 1324.9522, 3.311106  
41762, 12524, 1324.8902, 3.310951  
41763, 13218, 1324.8283, 3.310796  
41764, 13618, 1324.7664, 3.310641  
41765, 13278, 1324.7045, 3.310487  
41766, 12416, 1324.6425, 3.310332  
41767, 11662, 1324.5806, 3.310177  
41768, 11420, 1324.5187, 3.310022  
41769, 11542, 1324.4568, 3.309868  
41770, 11650, 1324.3948, 3.309713  
41771, 11622, 1324.3329, 3.309558  
41772, 11682, 1324.2710, 3.309403  
41773, 11998, 1324.2091, 3.309249  
41774, 12366, 1324.1471, 3.309094  
41775, 12436, 1324.0852, 3.308939  
41776, 12182, 1324.0233, 3.308784  
41777, 12058, 1323.9613, 3.308630  
41778, 12532, 1323.8994, 3.308475  
41779, 13530, 1323.8375, 3.308320  
41780, 14474, 1323.7756, 3.308165  
41781, 14880, 1323.7136, 3.308011  
41782, 14890, 1323.6517, 3.307856  
41783, 15110, 1323.5898, 3.307701  
41784, 15902, 1323.5279, 3.307546  
41785, 16950, 1323.4659, 3.307391  
41786, 17562, 1323.4040, 3.307237  
41787, 17388, 1323.3421, 3.307082  
41788, 16768, 1323.2801, 3.306927  
41789, 16328, 1323.2182, 3.306772  
41790, 16336, 1323.1563, 3.306618  
41791, 16522, 1323.0944, 3.306463  
41792, 16498, 1323.0324, 3.306308  
41793, 16220, 1322.9705, 3.306153  
41794, 15960, 1322.9086, 3.305999  
41795, 15900, 1322.8467, 3.305844  
41796, 15886, 1322.7847, 3.305689  
41797, 15672, 1322.7228, 3.305534  
41798, 15288, 1322.6609, 3.305380  
41799, 15050, 1322.5990, 3.305225  
41800, 15172, 1322.5370, 3.305070  
41801, 15426, 1322.4751, 3.304915  
41802, 15360, 1322.4132, 3.304761  
41803, 14776, 1322.3512, 3.304606  
41804, 13972, 1322.2893, 3.304451  
41805, 13386, 1322.2274, 3.304296  
41806, 13104, 1322.1655, 3.304142  
41807, 12856, 1322.1035, 3.303987  
41808, 12428, 1322.0416, 3.303832  
41809, 12066, 1321.9797, 3.303677  
41810, 12248, 1321.9178, 3.303523  
41811, 13086, 1321.8558, 3.303368  
41812, 14064, 1321.7939, 3.303213  
41813, 14494, 1321.7320, 3.303058  
41814, 14192, 1321.6700, 3.302903  
41815, 13624, 1321.6081, 3.302749  
41816, 13336, 1321.5462, 3.302594  
41817, 13312, 1321.4843, 3.302439  
41818, 13024, 1321.4223, 3.302284  
41819, 12114, 1321.3604, 3.302130  
41820, 10936, 1321.2985, 3.301975  
41821, 10310, 1321.2366, 3.301820  
41822, 10690, 1321.1746, 3.301665  
41823, 11706, 1321.1127, 3.301511  
41824, 12528, 1321.0508, 3.301356  
41825, 12674, 1320.9889, 3.301201  
41826, 12338, 1320.9269, 3.301046  
41827, 12042, 1320.8650, 3.300892  
41828, 12002, 1320.8031, 3.300737  
41829, 12016, 1320.7411, 3.300582  
41830, 11888, 1320.6792, 3.300427  
41831, 11784, 1320.6173, 3.300273  
41832, 12038, 1320.5554, 3.300118  
41833, 12714, 1320.4934, 3.300063  
41834, 13428, 1320.4315, 3.299808

41835, 13746, 1320.3696, 3.299654  
41836, 13622, 1320.3077, 3.299499  
41837, 13396, 1320.2457, 3.299344  
41838, 13288, 1320.1838, 3.299189  
41839, 13082, 1320.1219, 3.299035  
41840, 12388, 1320.0599, 3.298880  
41841, 11250, 1319.9980, 3.298725  
41842, 10248, 1319.9361, 3.298570  
41843, 9968, 1319.8742, 3.298416  
41844, 10360, 1319.8122, 3.298261  
41845, 10738, 1319.7503, 3.298106  
41846, 10508, 1319.6884, 3.297951  
41847, 9822, 1319.6265, 3.297796  
41848, 9416, 1319.5645, 3.297642  
41849, 9822, 1319.5026, 3.297487  
41850, 10764, 1319.4407, 3.297332  
41851, 11504, 1319.3788, 3.297177  
41852, 11632, 1319.3168, 3.297023  
41853, 11494, 1319.2549, 3.296868  
41854, 11740, 1319.1930, 3.296713  
41855, 12612, 1319.1310, 3.296558  
41856, 13638, 1319.0691, 3.296404  
41857, 14172, 1319.0072, 3.296249  
41858, 14062, 1318.9453, 3.296094  
41859, 13686, 1318.8833, 3.295939  
41860, 13508, 1318.8214, 3.295785  
41861, 13578, 1318.7595, 3.295630  
41862, 13650, 1318.6976, 3.295475  
41863, 13600, 1318.6356, 3.295320  
41864, 13624, 1318.5737, 3.295166  
41865, 13954, 1318.5118, 3.295011  
41866, 14468, 1318.4498, 3.294856  
41867, 14750, 1318.3879, 3.294701  
41868, 14548, 1318.3260, 3.294547  
41869, 14074, 1318.2641, 3.294392  
41870, 13804, 1318.2021, 3.294237  
41871, 13934, 1318.1402, 3.294082  
41872, 14154, 1318.0783, 3.293928  
41873, 14022, 1318.0164, 3.293773  
41874, 13454, 1317.9544, 3.293618  
41875, 12838, 1317.8925, 3.293463  
41876, 12612, 1317.8306, 3.293309  
41877, 12836, 1317.7687, 3.293154  
41878, 13232, 1317.7067, 3.292999  
41879, 13556, 1317.6448, 3.292844  
41880, 13854, 1317.5829, 3.292689  
41881, 14292, 1317.5209, 3.292535  
41882, 14816, 1317.4590, 3.292380  
41883, 15110, 1317.3971, 3.292225  
41884, 14914, 1317.3352, 3.292070  
41885, 14376, 1317.2732, 3.291916  
41886, 13938, 1317.2113, 3.291761  
41887, 13938, 1317.1494, 3.291606  
41888, 14342, 1317.0875, 3.291451  
41889, 14872, 1317.0255, 3.291297  
41890, 15338, 1316.9636, 3.291142  
41891, 15696, 1316.9017, 3.290987  
41892, 15902, 1316.8397, 3.290832  
41893, 15744, 1316.7778, 3.290678  
41894, 15064, 1316.7159, 3.290523  
41895, 14080, 1316.6540, 3.290368  
41896, 13364, 1316.5920, 3.290213  
41897, 13380, 1316.5301, 3.290059  
41898, 14004, 1316.4682, 3.289904  
41899, 14574, 1316.4063, 3.289749  
41900, 14512, 1316.3443, 3.289594  
41901, 13826, 1316.2824, 3.289440  
41902, 13058, 1316.2205, 3.289285  
41903, 12656, 1316.1586, 3.289130  
41904, 12558, 1316.0966, 3.288975  
41905, 12342, 1316.0347, 3.288821  
41906, 11754, 1315.9728, 3.288666  
41907, 10982, 1315.9108, 3.288511  
41908, 10396, 1315.8489, 3.288356  
41909, 10138, 1315.7870, 3.288202  
41910, 10054, 1315.7251, 3.288047

41911, 9986, 1315.6631, 3.287892  
41912, 10032, 1315.6012, 3.287737  
41913, 10364, 1315.5393, 3.287582  
41914, 10890, 1315.4774, 3.287428  
41915, 11242, 1315.4154, 3.287273  
41916, 11158, 1315.3535, 3.287118  
41917, 10874, 1315.2916, 3.286963  
41918, 10934, 1315.2296, 3.286809  
41919, 11588, 1315.1677, 3.286654  
41920, 12428, 1315.1058, 3.286499  
41921, 12716, 1315.0439, 3.286344  
41922, 12154, 1314.9819, 3.286190  
41923, 11186, 1314.9200, 3.286035  
41924, 10594, 1314.8581, 3.285880  
41925, 10748, 1314.7962, 3.285725  
41926, 11346, 1314.7342, 3.285571  
41927, 11882, 1314.6723, 3.285416  
41928, 12236, 1314.6104, 3.285261  
41929, 12718, 1314.5485, 3.285106  
41930, 13552, 1314.4865, 3.284952  
41931, 14464, 1314.4246, 3.284797  
41932, 14894, 1314.3627, 3.284642  
41933, 14632, 1314.3007, 3.284487  
41934, 14074, 1314.2388, 3.284333  
41935, 13846, 1314.1769, 3.284178  
41936, 14156, 1314.1150, 3.284023  
41937, 14626, 1314.0530, 3.283868  
41938, 14758, 1313.9911, 3.283714  
41939, 14472, 1313.9292, 3.283559  
41940, 14122, 1313.8673, 3.283404  
41941, 13992, 1313.8053, 3.283249  
41942, 13946, 1313.7434, 3.283095  
41943, 13624, 1313.6815, 3.282940  
41944, 12896, 1313.6195, 3.282785  
41945, 12104, 1313.5576, 3.282630  
41946, 11670, 1313.4957, 3.282475  
41947, 11684, 1313.4338, 3.282321  
41948, 11878, 1313.3718, 3.282166  
41949, 11996, 1313.3099, 3.282011  
41950, 12094, 1313.2480, 3.281856  
41951, 12364, 1313.1861, 3.281702  
41952, 12756, 1313.1241, 3.281547  
41953, 12918, 1313.0622, 3.281392  
41954, 12568, 1313.0003, 3.281237  
41955, 11912, 1312.9384, 3.281083  
41956, 11486, 1312.8764, 3.280928  
41957, 11638, 1312.8145, 3.280773  
41958, 12120, 1312.7526, 3.280618  
41959, 12348, 1312.6906, 3.280464  
41960, 12016, 1312.6287, 3.280309  
41961, 11386, 1312.5668, 3.280154  
41962, 10956, 1312.5049, 3.279999  
41963, 10920, 1312.4429, 3.279845  
41964, 11006, 1312.3810, 3.279690  
41965, 10892, 1312.3191, 3.279535  
41966, 10616, 1312.2572, 3.279380  
41967, 10530, 1312.1952, 3.279226  
41968, 10830, 1312.1333, 3.279071  
41969, 11336, 1312.0714, 3.278916  
41970, 11684, 1312.0094, 3.278761  
41971, 11786, 1311.9475, 3.278607  
41972, 11892, 1311.8856, 3.278452  
41973, 12196, 1311.8237, 3.278297  
41974, 12522, 1311.7617, 3.278142  
41975, 12504, 1311.6998, 3.277988  
41976, 12098, 1311.6379, 3.277833  
41977, 11772, 1311.5760, 3.277678  
41978, 12072, 1311.5140, 3.277523  
41979, 12974, 1311.4521, 3.277368  
41980, 13824, 1311.3902, 3.277214  
41981, 13952, 1311.3283, 3.277059  
41982, 13344, 1311.2663, 3.276904  
41983, 12616, 1311.2044, 3.276749  
41984, 12324, 1311.1425, 3.276595  
41985, 12396, 1311.0805, 3.276440  
41986, 12286, 1311.0186, 3.276285

41987, 11708, 1310.9567, 3.276130  
41988, 10998, 1310.8948, 3.275976  
41989, 10786, 1310.8328, 3.275821  
41990, 11292, 1310.7709, 3.275666  
41991, 12092, 1310.7090, 3.275511  
41992, 12596, 1310.6471, 3.275357  
41993, 12650, 1310.5851, 3.275202  
41994, 12560, 1310.5232, 3.275047  
41995, 12606, 1310.4613, 3.274892  
41996, 12668, 1310.3994, 3.274738  
41997, 12430, 1310.3374, 3.274583  
41998, 11928, 1310.2755, 3.274428  
41999, 11670, 1310.2136, 3.274273  
42000, 12150, 1310.1516, 3.274119  
42001, 13240, 1310.0897, 3.273964  
42002, 14240, 1310.0278, 3.273809  
42003, 14536, 1309.9659, 3.273654  
42004, 14180, 1309.9039, 3.273500  
42005, 13758, 1309.8420, 3.273345  
42006, 13710, 1309.7801, 3.273190  
42007, 13916, 1309.7182, 3.273035  
42008, 13966, 1309.6562, 3.272881  
42009, 13732, 1309.5943, 3.272726  
42010, 13570, 1309.5324, 3.272571  
42011, 13866, 1309.4704, 3.272416  
42012, 14500, 1309.4085, 3.272261  
42013, 14946, 1309.3466, 3.272107  
42014, 14800, 1309.2847, 3.271952  
42015, 14254, 1309.2227, 3.271797  
42016, 13848, 1309.1608, 3.271642  
42017, 13902, 1309.0989, 3.271488  
42018, 14220, 1309.0370, 3.271333  
42019, 14420, 1308.9750, 3.271178  
42020, 14450, 1308.9131, 3.271023  
42021, 14602, 1308.8512, 3.270869  
42022, 15052, 1308.7893, 3.270714  
42023, 15488, 1308.7273, 3.270559  
42024, 15328, 1308.6654, 3.270404  
42025, 14316, 1308.6035, 3.270250  
42026, 12848, 1308.5415, 3.270095  
42027, 11626, 1308.4796, 3.269940  
42028, 11078, 1308.4177, 3.269785  
42029, 11106, 1308.3558, 3.269631  
42030, 11428, 1308.2938, 3.269476  
42031, 11930, 1308.2319, 3.269321  
42032, 12626, 1308.1700, 3.269166  
42033, 13350, 1308.1081, 3.269012  
42034, 13674, 1308.0461, 3.268857  
42035, 13284, 1307.9842, 3.268702  
42036, 12422, 1307.9223, 3.268547  
42037, 11770, 1307.8603, 3.268393  
42038, 11806, 1307.7984, 3.268238  
42039, 12342, 1307.7365, 3.268083  
42040, 12712, 1307.6746, 3.267928  
42041, 12506, 1307.6126, 3.267774  
42042, 11964, 1307.5507, 3.267619  
42043, 11620, 1307.4888, 3.267464  
42044, 11616, 1307.4269, 3.267309  
42045, 11554, 1307.3649, 3.267154  
42046, 11026, 1307.3030, 3.267000  
42047, 10250, 1307.2411, 3.266845  
42048, 9974, 1307.1792, 3.266690  
42049, 10714, 1307.1172, 3.266535  
42050, 12154, 1307.0553, 3.266381  
42051, 13426, 1306.9934, 3.266226  
42052, 13954, 1306.9314, 3.266071  
42053, 13938, 1306.8695, 3.265916  
42054, 13992, 1306.8076, 3.265762  
42055, 14340, 1306.7457, 3.265607  
42056, 14564, 1306.6837, 3.265452  
42057, 14140, 1306.6218, 3.265297  
42058, 13112, 1306.5599, 3.265143  
42059, 12126, 1306.4980, 3.264988  
42060, 11760, 1306.4360, 3.264833  
42061, 11932, 1306.3741, 3.264678  
42062, 12074, 1306.3122, 3.264524

42063, 11810, 1306.2502, 3.264369  
42064, 11348, 1306.1883, 3.264214  
42065, 11160, 1306.1264, 3.264059  
42066, 11394, 1306.0645, 3.263905  
42067, 11694, 1306.0025, 3.263750  
42068, 11696, 1305.9406, 3.263595  
42069, 11504, 1305.8787, 3.263440  
42070, 11564, 1305.8168, 3.263286  
42071, 12090, 1305.7548, 3.263131  
42072, 12708, 1305.6929, 3.262976  
42073, 12818, 1305.6310, 3.262821  
42074, 12250, 1305.5691, 3.262667  
42075, 11466, 1305.5071, 3.262512  
42076, 11104, 1305.4452, 3.262357  
42077, 11362, 1305.3833, 3.262202  
42078, 11908, 1305.3213, 3.262047  
42079, 12346, 1305.2594, 3.261893  
42080, 12624, 1305.1975, 3.261738  
42081, 12898, 1305.1356, 3.261583  
42082, 13122, 1305.0736, 3.261428  
42083, 12960, 1305.0117, 3.261274  
42084, 12192, 1304.9498, 3.261119  
42085, 11170, 1304.8879, 3.260964  
42086, 10618, 1304.8259, 3.260809  
42087, 11002, 1304.7640, 3.260655  
42088, 12044, 1304.7021, 3.260500  
42089, 13002, 1304.6401, 3.260345  
42090, 13402, 1304.5782, 3.260190  
42091, 13374, 1304.5163, 3.260036  
42092, 13338, 1304.4544, 3.259881  
42093, 13384, 1304.3924, 3.259726  
42094, 13210, 1304.3305, 3.259571  
42095, 12598, 1304.2686, 3.259417  
42096, 11864, 1304.2067, 3.259262  
42097, 11620, 1304.1447, 3.259107  
42098, 12076, 1304.0828, 3.258952  
42099, 12718, 1304.0209, 3.258798  
42100, 12808, 1303.9590, 3.258643  
42101, 12176, 1303.8970, 3.258488  
42102, 11446, 1303.8351, 3.258333  
42103, 11380, 1303.7732, 3.258179  
42104, 12082, 1303.7112, 3.258024  
42105, 12910, 1303.6493, 3.257869  
42106, 13214, 1303.5874, 3.257714  
42107, 12994, 1303.5255, 3.257559  
42108, 12804, 1303.4635, 3.257405  
42109, 13014, 1303.4016, 3.257250  
42110, 13360, 1303.3397, 3.257095  
42111, 13282, 1303.2778, 3.256940  
42112, 12684, 1303.2158, 3.256786  
42113, 12124, 1303.1539, 3.256631  
42114, 12260, 1303.0920, 3.256476  
42115, 13102, 1303.0300, 3.256321  
42116, 13972, 1302.9681, 3.256167  
42117, 14194, 1302.9062, 3.256012  
42118, 13750, 1302.8443, 3.255857  
42119, 13212, 1302.7823, 3.255702  
42120, 13058, 1302.7204, 3.255548  
42121, 13218, 1302.6585, 3.255393  
42122, 13276, 1302.5966, 3.255238  
42123, 13034, 1302.5346, 3.255083  
42124, 12726, 1302.4727, 3.254929  
42125, 12630, 1302.4108, 3.254774  
42126, 12636, 1302.3489, 3.254619  
42127, 12298, 1302.2869, 3.254464  
42128, 11394, 1302.2250, 3.254310  
42129, 10260, 1302.1631, 3.254155  
42130, 9524, 1302.1011, 3.254000  
42131, 9482, 1302.0392, 3.253845  
42132, 9844, 1301.9773, 3.253691  
42133, 10092, 1301.9154, 3.253536  
42134, 10056, 1301.8534, 3.253381  
42135, 10022, 1301.7915, 3.253226  
42136, 10340, 1301.7296, 3.253072  
42137, 11000, 1301.6677, 3.252917  
42138, 11666, 1301.6057, 3.252762

42139, 12108, 1301.5438, 3.252607  
42140, 12438, 1301.4819, 3.252452  
42141, 12924, 1301.4199, 3.252298  
42142, 13604, 1301.3580, 3.252143  
42143, 14176, 1301.2961, 3.251988  
42144, 14342, 1301.2342, 3.251833  
42145, 14110, 1301.1722, 3.251679  
42146, 13712, 1301.1103, 3.251524  
42147, 13292, 1301.0484, 3.251369  
42148, 12760, 1300.9865, 3.251214  
42149, 12028, 1300.9245, 3.251060  
42150, 11304, 1300.8626, 3.250905  
42151, 11014, 1300.8007, 3.250750  
42152, 11378, 1300.7388, 3.250595  
42153, 12108, 1300.6768, 3.250441  
42154, 12632, 1300.6149, 3.250286  
42155, 12634, 1300.5530, 3.250131  
42156, 12332, 1300.4910, 3.249976  
42157, 12168, 1300.4291, 3.249822  
42158, 12302, 1300.3672, 3.249667  
42159, 12442, 1300.3053, 3.249512  
42160, 12228, 1300.2433, 3.249357  
42161, 11680, 1300.1814, 3.249203  
42162, 11186, 1300.1195, 3.249048  
42163, 11086, 1300.0576, 3.248893  
42164, 11314, 1299.9956, 3.248738  
42165, 11502, 1299.9337, 3.248584  
42166, 11430, 1299.8718, 3.248429  
42167, 11234, 1299.8098, 3.248274  
42168, 11218, 1299.7479, 3.248119  
42169, 11464, 1299.6860, 3.247965  
42170, 11772, 1299.6241, 3.247810  
42171, 11924, 1299.5621, 3.247655  
42172, 11926, 1299.5002, 3.247500  
42173, 11932, 1299.4383, 3.247345  
42174, 11964, 1299.3764, 3.247191  
42175, 11874, 1299.3144, 3.247036  
42176, 11576, 1299.2525, 3.246881  
42177, 11262, 1299.1906, 3.246726  
42178, 11262, 1299.1287, 3.246572  
42179, 11644, 1299.0667, 3.246417  
42180, 12030, 1299.0048, 3.246262  
42181, 11936, 1298.9429, 3.246107  
42182, 11286, 1298.8809, 3.245953  
42183, 10556, 1298.8190, 3.245798  
42184, 10314, 1298.7571, 3.245643  
42185, 10690, 1298.6952, 3.245488  
42186, 11280, 1298.6332, 3.245334  
42187, 11626, 1298.5713, 3.245179  
42188, 11658, 1298.5094, 3.245024  
42189, 11700, 1298.4475, 3.244869  
42190, 12020, 1298.3855, 3.244715  
42191, 12576, 1298.3236, 3.244560  
42192, 13150, 1298.2617, 3.244405  
42193, 13700, 1298.1998, 3.244250  
42194, 14394, 1298.1378, 3.244096  
42195, 15266, 1298.0759, 3.243941  
42196, 15952, 1298.0140, 3.243786  
42197, 15942, 1297.9520, 3.243631  
42198, 15086, 1297.8901, 3.243477  
42199, 13842, 1297.8282, 3.243322  
42200, 12886, 1297.7663, 3.243167  
42201, 12488, 1297.7043, 3.243012  
42202, 12350, 1297.6424, 3.242858  
42203, 12054, 1297.5805, 3.242703  
42204, 11604, 1297.5186, 3.242548  
42205, 11426, 1297.4566, 3.242393  
42206, 11818, 1297.3947, 3.242238  
42207, 12514, 1297.3328, 3.242084  
42208, 12846, 1297.2708, 3.241929  
42209, 12384, 1297.2089, 3.241774  
42210, 11354, 1297.1470, 3.241619  
42211, 10346, 1297.0851, 3.241465  
42212, 9776, 1297.0231, 3.241310  
42213, 9586, 1296.9612, 3.241155  
42214, 9528, 1296.8993, 3.241000  
42215, 9534, 1296.8374, 3.240846  
42216, 9772, 1296.7754, 3.240691  
42217, 10336, 1296.7135, 3.240536  
42218, 11052, 1296.6516, 3.240381  
42219, 11674, 1296.5897, 3.240227  
42220, 12188, 1296.5277, 3.240072  
42221, 12788, 1296.4658, 3.239917  
42222, 13500, 1296.4039, 3.239762  
42223, 13968, 1296.3419, 3.239608  
42224, 13732, 1296.2800, 3.239453  
42225, 12772, 1296.2181, 3.239298  
42226, 11676, 1296.1562, 3.239143  
42227, 11120, 1296.0942, 3.238989  
42228, 11218, 1296.0323, 3.238834  
42229, 11436, 1295.9704, 3.238679  
42230, 11216, 1295.9085, 3.238524  
42231, 10662, 1295.8465, 3.238370  
42232, 10438, 1295.7846, 3.238215  
42233, 11020, 1295.7227, 3.238060  
42234, 12114, 1295.6607, 3.237905  
42235, 12864, 1295.5988, 3.237751  
42236, 12710, 1295.5369, 3.237596  
42237, 11900, 1295.4750, 3.237441  
42238, 11154, 1295.4130, 3.237286  
42239, 10934, 1295.3511, 3.237131  
42240, 11102, 1295.2892, 3.236977  
42241, 11272, 1295.2273, 3.236822  
42242, 11344, 1295.1653, 3.236667  
42243, 11554, 1295.1034, 3.236512  
42244, 11972, 1295.0415, 3.236358  
42245, 12226, 1294.9796, 3.236203  
42246, 11798, 1294.9176, 3.236048  
42247, 10688, 1294.8557, 3.235893  
42248, 9564, 1294.7938, 3.235739  
42249, 9182, 1294.7318, 3.235584  
42250, 9672, 1294.6699, 3.235429  
42251, 10440, 1294.6080, 3.235274  
42252, 10844, 1294.5461, 3.235120  
42253, 10848, 1294.4841, 3.234965  
42254, 10956, 1294.4222, 3.234810  
42255, 11548, 1294.3603, 3.234655  
42256, 12400, 1294.2984, 3.234501  
42257, 12922, 1294.2364, 3.234346  
42258, 12834, 1294.1745, 3.234191  
42259, 12458, 1294.1126, 3.234036  
42260, 12276, 1294.0506, 3.233882  
42261, 12392, 1293.9887, 3.233727  
42262, 12450, 1293.9268, 3.233572  
42263, 12144, 1293.8649, 3.233417  
42264, 11652, 1293.8029, 3.233263  
42265, 11456, 1293.7410, 3.233108  
42266, 11754, 1293.6791, 3.232953  
42267, 12208, 1293.6172, 3.232798  
42268, 12318, 1293.5552, 3.232644  
42269, 12046, 1293.4933, 3.232489  
42270, 11872, 1293.4314, 3.232334  
42271, 12278, 1293.3695, 3.232179  
42272, 13184, 1293.3075, 3.232024  
42273, 14004, 1293.2456, 3.231870  
42274, 14242, 1293.1837, 3.231715  
42275, 13948, 1293.1217, 3.231560  
42276, 13562, 1293.0598, 3.231405  
42277, 13394, 1292.9979, 3.231251  
42278, 13382, 1292.9360, 3.231096  
42279, 13348, 1292.8740, 3.230941  
42280, 13354, 1292.8121, 3.230786  
42281, 13660, 1292.7502, 3.230632  
42282, 14290, 1292.6883, 3.230477  
42283, 14850, 1292.6263, 3.230322  
42284, 14870, 1292.5644, 3.230167  
42285, 14318, 1292.5025, 3.230013  
42286, 13696, 1292.4405, 3.229858  
42287, 13494, 1292.3786, 3.229703  
42288, 13672, 1292.3167, 3.229548  
42289, 13722, 1292.2548, 3.229394  
42290, 13316, 1292.1928, 3.229239  
42291, 12726, 1292.1309, 3.229084  
42292, 12522, 1292.0690, 3.228929  
42293, 12902, 1292.0071, 3.228775  
42294, 13378, 1291.9451, 3.228620  
42295, 13274, 1291.8832, 3.228465  
42296, 12456, 1291.8213, 3.228310  
42297, 11492, 1291.7594, 3.228156  
42298, 11056, 1291.6974, 3.228001  
42299, 11224, 1291.6355, 3.227846  
42300, 11480, 1291.5736, 3.227691  
42301, 11384, 1291.5116, 3.227537  
42302, 11058, 1291.4497, 3.227382  
42303, 11020, 1291.3878, 3.227227  
42304, 11502, 1291.3259, 3.227072  
42305, 12150, 1291.2639, 3.226917  
42306, 12400, 1291.2020, 3.226763  
42307, 12120, 1291.1401, 3.226608  
42308, 11752, 1291.0782, 3.226453  
42309, 11748, 1291.0162, 3.226298  
42310, 12058, 1290.9543, 3.226144  
42311, 12198, 1290.8924, 3.225989  
42312, 11860, 1290.8304, 3.225834  
42313, 11288, 1290.7685, 3.225679  
42314, 11026, 1290.7066, 3.225525  
42315, 11272, 1290.6447, 3.225370  
42316, 11712, 1290.5827, 3.225215  
42317, 11896, 1290.5208, 3.225060  
42318, 11776, 1290.4589, 3.224906  
42319, 11724, 1290.3970, 3.224751  
42320, 12008, 1290.3350, 3.224596  
42321, 12442, 1290.2731, 3.224441  
42322, 12590, 1290.2112, 3.224287  
42323, 12364, 1290.1493, 3.224132  
42324, 12200, 1290.0873, 3.223977  
42325, 12602, 1290.0254, 3.223822  
42326, 13498, 1289.9635, 3.223668  
42327, 14204, 1289.9015, 3.223513  
42328, 14066, 1289.8396, 3.223358  
42329, 13152, 1289.7777, 3.223203  
42330, 12208, 1289.7158, 3.223049  
42331, 11982, 1289.6538, 3.222894  
42332, 12558, 1289.5919, 3.222739  
42333, 13390, 1289.5300, 3.222584  
42334, 13906, 1289.4681, 3.222430  
42335, 13960, 1289.4061, 3.222275  
42336, 13790, 1289.3442, 3.222120  
42337, 13656, 1289.2823, 3.221965  
42338, 13606, 1289.2203, 3.221810  
42339, 13588, 1289.1584, 3.221656  
42340, 13656, 1289.0965, 3.221501  
42341, 13886, 1289.0346, 3.221346  
42342, 14228, 1288.9726, 3.221191  
42343, 14460, 1288.9107, 3.221037  
42344, 14454, 1288.8488, 3.220882  
42345, 14344, 1288.7869, 3.220727  
42346, 14410, 1288.7249, 3.220572  
42347, 14698, 1288.6630, 3.220418  
42348, 14920, 1288.6011, 3.220263  
42349, 14766, 1288.5392, 3.220108  
42350, 14302, 1288.4772, 3.219953  
42351, 13974, 1288.4153, 3.219799  
42352, 14084, 1288.3534, 3.219644  
42353, 14382, 1288.2914, 3.219489  
42354, 14216, 1288.2295, 3.219334  
42355, 13220, 1288.1676, 3.219180  
42356, 11756, 1288.1057, 3.219025  
42357, 10630, 1288.0437, 3.218870  
42358, 10366, 1287.9818, 3.218715  
42359, 10740, 1287.9199, 3.218561  
42360, 11074, 1287.8580, 3.218406  
42361, 10926, 1287.7960, 3.218251  
42362, 10454, 1287.7341, 3.218096  
42363, 10104, 1287.6722, 3.217942  
42364, 10124, 1287.6102, 3.217787  
42365, 10378, 1287.5483, 3.217632  
42366, 10652, 1287.4864, 3.217477

42367, 10926, 1287.4245, 3.217323  
42368, 11318, 1287.3625, 3.217168  
42369, 11766, 1287.3006, 3.217013  
42370, 11980, 1287.2387, 3.216858  
42371, 11738, 1287.1768, 3.216703  
42372, 11230, 1287.1148, 3.216549  
42373, 10942, 1287.0529, 3.216394  
42374, 11172, 1286.9910, 3.216239  
42375, 11720, 1286.9291, 3.216084  
42376, 12118, 1286.8671, 3.215930  
42377, 12118, 1286.8052, 3.215775  
42378, 11956, 1286.7433, 3.215620  
42379, 12002, 1286.6813, 3.215465  
42380, 12290, 1286.6194, 3.215311  
42381, 12490, 1286.5575, 3.215156  
42382, 12328, 1286.4956, 3.215001  
42383, 11982, 1286.4336, 3.214846  
42384, 11924, 1286.3717, 3.214692  
42385, 12394, 1286.3098, 3.214537  
42386, 13090, 1286.2479, 3.214382  
42387, 13440, 1286.1859, 3.214227  
42388, 13232, 1286.1240, 3.214073  
42389, 12806, 1286.0621, 3.213918  
42390, 12668, 1286.0001, 3.213763  
42391, 12944, 1285.9382, 3.213608  
42392, 13250, 1285.8763, 3.213454  
42393, 13136, 1285.8144, 3.213299  
42394, 12548, 1285.7524, 3.213144  
42395, 11812, 1285.6905, 3.212989  
42396, 11228, 1285.6286, 3.212835  
42397, 10796, 1285.5667, 3.212680  
42398, 10368, 1285.5047, 3.212525  
42399, 9988, 1285.4428, 3.212370  
42400, 9946, 1285.3809, 3.212215  
42401, 10458, 1285.3190, 3.212061  
42402, 11332, 1285.2570, 3.211906  
42403, 12052, 1285.1951, 3.211751  
42404, 12226, 1285.1332, 3.211596  
42405, 11892, 1285.0712, 3.211442  
42406, 11416, 1285.0093, 3.211287  
42407, 11090, 1284.9474, 3.211132  
42408, 10942, 1284.8855, 3.210977  
42409, 10862, 1284.8235, 3.210823  
42410, 10848, 1284.7616, 3.210668  
42411, 10948, 1284.6997, 3.210513  
42412, 11098, 1284.6378, 3.210358  
42413, 11070, 1284.5758, 3.210204  
42414, 10722, 1284.5139, 3.210049  
42415, 10252, 1284.4520, 3.209894  
42416, 10108, 1284.3901, 3.209739  
42417, 10526, 1284.3281, 3.209585  
42418, 11232, 1284.2662, 3.209430  
42419, 11654, 1284.2043, 3.209275  
42420, 11474, 1284.1423, 3.209120  
42421, 10954, 1284.0804, 3.208966  
42422, 10664, 1284.0185, 3.208811  
42423, 10886, 1283.9566, 3.208656  
42424, 11396, 1283.8946, 3.208501  
42425, 11764, 1283.8327, 3.208347  
42426, 11828, 1283.7708, 3.208192  
42427, 11820, 1283.7089, 3.208037  
42428, 12000, 1283.6469, 3.207882  
42429, 12264, 1283.5850, 3.207728  
42430, 12266, 1283.5231, 3.207573  
42431, 11812, 1283.4611, 3.207418  
42432, 11146, 1283.3992, 3.207263  
42433, 10694, 1283.3373, 3.207108  
42434, 10626, 1283.2754, 3.206954  
42435, 10698, 1283.2134, 3.206799  
42436, 10544, 1283.1515, 3.206644  
42437, 10096, 1283.0896, 3.206489  
42438, 9626, 1283.0277, 3.206335  
42439, 9464, 1282.9657, 3.206180  
42440, 9698, 1282.9038, 3.206025  
42441, 10210, 1282.8419, 3.205870  
42442, 10890, 1282.7800, 3.205716

42443, 11722, 1282.7180, 3.205561  
42444, 12630, 1282.6561, 3.205406  
42445, 13340, 1282.5942, 3.205251  
42446, 13526, 1282.5322, 3.205097  
42447, 13160, 1282.4703, 3.204942  
42448, 12568, 1282.4084, 3.204787  
42449, 12176, 1282.3465, 3.204632  
42450, 12096, 1282.2845, 3.204478  
42451, 12100, 1282.2226, 3.204323  
42452, 11960, 1282.1607, 3.204168  
42453, 11772, 1282.0988, 3.204013  
42454, 11840, 1282.0368, 3.203859  
42455, 12288, 1281.9749, 3.203704  
42456, 12876, 1281.9130, 3.203549  
42457, 13246, 1281.8510, 3.203394  
42458, 13336, 1281.7891, 3.203240  
42459, 13402, 1281.7272, 3.203085  
42460, 13634, 1281.6653, 3.202930  
42461, 13828, 1281.6033, 3.202775  
42462, 13562, 1281.5414, 3.202621  
42463, 12728, 1281.4795, 3.202466  
42464, 11788, 1281.4176, 3.202311  
42465, 11366, 1281.3556, 3.202156  
42466, 11620, 1281.2937, 3.202001  
42467, 12046, 1281.2318, 3.201847  
42468, 12028, 1281.1699, 3.201692  
42469, 11530, 1281.1079, 3.201537  
42470, 11106, 1281.0460, 3.201382  
42471, 11280, 1280.9841, 3.201228  
42472, 11878, 1280.9221, 3.201073  
42473, 12186, 1280.8602, 3.200918  
42474, 11678, 1280.7983, 3.200763  
42475, 10584, 1280.7364, 3.200609  
42476, 9630, 1280.6744, 3.200454  
42477, 9274, 1280.6125, 3.200299  
42478, 9318, 1280.5506, 3.200144  
42479, 9232, 1280.4887, 3.199990  
42480, 8860, 1280.4267, 3.199835  
42481, 8586, 1280.3648, 3.199680  
42482, 8874, 1280.3029, 3.199525  
42483, 9718, 1280.2409, 3.199371  
42484, 10648, 1280.1790, 3.199216  
42485, 11250, 1280.1171, 3.199061  
42486, 11584, 1280.0552, 3.198906  
42487, 11976, 1279.9932, 3.198752  
42488, 12542, 1279.9313, 3.198597  
42489, 13002, 1279.8694, 3.198442  
42490, 13072, 1279.8075, 3.198287  
42491, 12906, 1279.7455, 3.198133  
42492, 12970, 1279.6836, 3.197978  
42493, 13510, 1279.6217, 3.197823  
42494, 14138, 1279.5598, 3.197668  
42495, 14178, 1279.4978, 3.197514  
42496, 13340, 1279.4359, 3.197359  
42497, 12068, 1279.3740, 3.197204  
42498, 11082, 1279.3120, 3.197049  
42499, 10714, 1279.2501, 3.196894  
42500, 10634, 1279.1882, 3.196740  
42501, 10350, 1279.1263, 3.196585  
42502, 9780, 1279.0643, 3.196430  
42503, 9282, 1279.0024, 3.196275  
42504, 9202, 1278.9405, 3.196121  
42505, 9424, 1278.8786, 3.195966  
42506, 9552, 1278.8166, 3.195811  
42507, 9422, 1278.7547, 3.195656  
42508, 9336, 1278.6928, 3.195502  
42509, 9710, 1278.6308, 3.195347  
42510, 10600, 1278.5689, 3.195192  
42511, 11618, 1278.5070, 3.195037  
42512, 12380, 1278.4451, 3.194883  
42513, 12872, 1278.3831, 3.194728  
42514, 13380, 1278.3212, 3.194573  
42515, 14016, 1278.2593, 3.194418  
42516, 14504, 1278.1974, 3.194264  
42517, 14458, 1278.1354, 3.194109  
42518, 13858, 1278.0735, 3.193954

42519, 13106, 1278.0116, 3.193799  
42520, 12640, 1277.9497, 3.193645  
42521, 12496, 1277.8877, 3.193490  
42522, 12376, 1277.8258, 3.193335  
42523, 12046, 1277.7639, 3.193180  
42524, 11664, 1277.7019, 3.193026  
42525, 11506, 1277.6400, 3.192871  
42526, 11612, 1277.5781, 3.192716  
42527, 11658, 1277.5162, 3.192561  
42528, 11346, 1277.4542, 3.192407  
42529, 10782, 1277.3923, 3.192252  
42530, 10398, 1277.3304, 3.192097  
42531, 10470, 1277.2685, 3.191942  
42532, 10824, 1277.2065, 3.191787  
42533, 11020, 1277.1446, 3.191633  
42534, 10882, 1277.0827, 3.191478  
42535, 10690, 1277.0207, 3.191323  
42536, 10860, 1276.9588, 3.191168  
42537, 11430, 1276.8969, 3.191014  
42538, 12010, 1276.8350, 3.190859  
42539, 12198, 1276.7730, 3.190704  
42540, 11998, 1276.7111, 3.190549  
42541, 11772, 1276.6492, 3.190395  
42542, 11824, 1276.5873, 3.190240  
42543, 12116, 1276.5253, 3.190085  
42544, 12406, 1276.4634, 3.189930  
42545, 12604, 1276.4015, 3.189776  
42546, 12850, 1276.3396, 3.189621  
42547, 13252, 1276.2776, 3.189466  
42548, 13620, 1276.2157, 3.189311  
42549, 13638, 1276.1538, 3.189157  
42550, 13232, 1276.0918, 3.189002  
42551, 12710, 1276.0299, 3.188847  
42552, 12498, 1275.9680, 3.188692  
42553, 12670, 1275.9061, 3.188538  
42554, 12880, 1275.8441, 3.188383  
42555, 12756, 1275.7822, 3.188228  
42556, 12310, 1275.7203, 3.188073  
42557, 11876, 1275.6584, 3.187919  
42558, 11720, 1275.5964, 3.187764  
42559, 11744, 1275.5345, 3.187609  
42560, 11646, 1275.4726, 3.187454  
42561, 11322, 1275.4106, 3.187300  
42562, 10948, 1275.3487, 3.187145  
42563, 10716, 1275.2868, 3.186990  
42564, 10540, 1275.2249, 3.186835  
42565, 10150, 1275.1629, 3.186680  
42566, 9492, 1275.1010, 3.186526  
42567, 8908, 1275.0391, 3.186371  
42568, 8808, 1274.9772, 3.186216  
42569, 9210, 1274.9152, 3.186061  
42570, 9656, 1274.8533, 3.185907  
42571, 9686, 1274.7914, 3.185752  
42572, 9360, 1274.7295, 3.185597  
42573, 9170, 1274.6675, 3.185442  
42574, 9510, 1274.6056, 3.185288  
42575, 10214, 1274.5437, 3.185133  
42576, 10740, 1274.4817, 3.184978  
42577, 10764, 1274.4198, 3.184823  
42578, 10468, 1274.3579, 3.184669  
42579, 10266, 1274.2960, 3.184514  
42580, 10284, 1274.2340, 3.184359  
42581, 10258, 1274.1721, 3.184204  
42582, 9966, 1274.1102, 3.184050  
42583, 9604, 1274.0483, 3.183895  
42584, 9606, 1273.9863, 3.183740  
42585, 10114, 1273.9244, 3.183585  
42586, 10704, 1273.8625, 3.183431  
42587, 10794, 1273.8005, 3.183276  
42588, 10278, 1273.7386, 3.183121  
42589, 9652, 1273.6767, 3.182966  
42590, 9468, 1273.6148, 3.182812  
42591, 9708, 1273.5528, 3.182657  
42592, 9832, 1273.4909, 3.182502  
42593, 9462, 1273.4290, 3.182347  
42594, 8850, 1273.3671, 3.182193



42595, 8648, 1273.3051, 3.182038  
42596, 9134, 1273.2432, 3.181883  
42597, 9892, 1273.1813, 3.181728  
42598, 10248, 1273.1194, 3.181573  
42599, 10082, 1273.0574, 3.181419  
42600, 9968, 1272.9955, 3.181264  
42601, 10534, 1272.9336, 3.181109  
42602, 11728, 1272.8716, 3.180954  
42603, 12784, 1272.8097, 3.180800  
42604, 13006, 1272.7478, 3.180645  
42605, 12456, 1272.6859, 3.180490  
42606, 11804, 1272.6239, 3.180335  
42607, 11606, 1272.5620, 3.180181  
42608, 11748, 1272.5001, 3.180026  
42609, 11716, 1272.4382, 3.179871  
42610, 11224, 1272.3762, 3.179716  
42611, 10526, 1272.3143, 3.179562  
42612, 10048, 1272.2524, 3.179407  
42613, 9866, 1272.1904, 3.179252  
42614, 9674, 1272.1285, 3.179097  
42615, 9250, 1272.0666, 3.178943  
42616, 8788, 1272.0047, 3.178788  
42617, 8678, 1271.9427, 3.178633  
42618, 8996, 1271.8808, 3.178478  
42619, 9372, 1271.8189, 3.178324  
42620, 9404, 1271.7570, 3.178169  
42621, 9162, 1271.6950, 3.178014  
42622, 9120, 1271.6331, 3.177859  
42623, 9592, 1271.5712, 3.177705  
42624, 10296, 1271.5093, 3.177550  
42625, 10608, 1271.4473, 3.177395  
42626, 10256, 1271.3854, 3.177240  
42627, 9648, 1271.3235, 3.177086  
42628, 9466, 1271.2615, 3.176931  
42629, 9920, 1271.1996, 3.176776  
42630, 10546, 1271.1377, 3.176621  
42631, 10704, 1271.0758, 3.176466  
42632, 10266, 1271.0138, 3.176312  
42633, 9722, 1270.9519, 3.176157  
42634, 9628, 1270.8900, 3.176002  
42635, 10066, 1270.8281, 3.175847  
42636, 10646, 1270.7661, 3.175693  
42637, 11020, 1270.7042, 3.175538  
42638, 11208, 1270.6423, 3.175383  
42639, 11482, 1270.5804, 3.175228  
42640, 11908, 1270.5184, 3.175074  
42641, 12268, 1270.4565, 3.174919  
42642, 12328, 1270.3946, 3.174764  
42643, 12150, 1270.3326, 3.174609  
42644, 12056, 1270.2707, 3.174455  
42645, 12236, 1270.2088, 3.174300  
42646, 12542, 1270.1469, 3.174145  
42647, 12662, 1270.0849, 3.173990  
42648, 12468, 1270.0230, 3.173836  
42649, 12116, 1269.9611, 3.173681  
42650, 11806, 1269.8992, 3.173526  
42651, 11552, 1269.8372, 3.173371  
42652, 11272, 1269.7753, 3.173217  
42653, 11036, 1269.7134, 3.173062  
42654, 11108, 1269.6514, 3.172907  
42655, 11652, 1269.5895, 3.172752  
42656, 12418, 1269.5276, 3.172598  
42657, 12870, 1269.4657, 3.172443  
42658, 12660, 1269.4037, 3.172288  
42659, 11944, 1269.3418, 3.172133  
42660, 11184, 1269.2799, 3.171979  
42661, 10632, 1269.2180, 3.171824  
42662, 10136, 1269.1560, 3.171669  
42663, 9424, 1269.0941, 3.171514  
42664, 8576, 1269.0322, 3.171359  
42665, 8034, 1268.9703, 3.171205  
42666, 8118, 1268.9083, 3.171050  
42667, 8614, 1268.8464, 3.170895  
42668, 8960, 1268.7845, 3.170740  
42669, 8858, 1268.7225, 3.170586  
42670, 8604, 1268.6606, 3.170431  
42671, 8758, 1268.5987, 3.170276  
42672, 9492, 1268.5368, 3.170121  
42673, 10336, 1268.4748, 3.169967  
42674, 10650, 1268.4129, 3.169812  
42675, 10272, 1268.3510, 3.169657  
42676, 9652, 1268.2891, 3.169502  
42677, 9334, 1268.2271, 3.169348  
42678, 9412, 1268.1652, 3.169193  
42679, 9566, 1268.1033, 3.169038  
42680, 9578, 1268.0413, 3.168883  
42681, 9668, 1267.9794, 3.168729  
42682, 10218, 1267.9175, 3.168574  
42683, 11250, 1267.8556, 3.168419  
42684, 12268, 1267.7936, 3.168264  
42685, 12720, 1267.7317, 3.168110  
42686, 12550, 1267.6698, 3.167955  
42687, 12228, 1267.6079, 3.167800  
42688, 12196, 1267.5459, 3.167645  
42689, 12404, 1267.4840, 3.167491  
42690, 12410, 1267.4221, 3.167336  
42691, 11946, 1267.3602, 3.167181  
42692, 11238, 1267.2982, 3.167026  
42693, 10756, 1267.2363, 3.166871  
42694, 10690, 1267.1744, 3.166717  
42695, 10764, 1267.1124, 3.166562  
42696, 10612, 1267.0505, 3.166407  
42697, 10204, 1266.9886, 3.166252  
42698, 9844, 1266.9267, 3.166098  
42699, 9760, 1266.8647, 3.165943  
42700, 9802, 1266.8028, 3.165788  
42701, 9614, 1266.7409, 3.165633  
42702, 9104, 1266.6790, 3.165479  
42703, 8576, 1266.6170, 3.165324  
42704, 8418, 1266.5551, 3.165169  
42705, 8674, 1266.4932, 3.165014  
42706, 9010, 1266.4312, 3.164860  
42707, 9124, 1266.3693, 3.164705  
42708, 9056, 1266.3074, 3.164550  
42709, 9110, 1266.2455, 3.164395  
42710, 9474, 1266.1835, 3.164241  
42711, 10018, 1266.1216, 3.164086  
42712, 10516, 1266.0597, 3.163931  
42713, 10940, 1265.9978, 3.163776  
42714, 11474, 1265.9358, 3.163622  
42715, 12224, 1265.8739, 3.163467  
42716, 12968, 1265.8120, 3.163312  
42717, 13416, 1265.7501, 3.163157  
42718, 13570, 1265.6881, 3.163003  
42719, 13822, 1265.6262, 3.162848  
42720, 14556, 1265.5643, 3.162693  
42721, 15694, 1265.5023, 3.162538  
42722, 16704, 1265.4404, 3.162384  
42723, 17076, 1265.3785, 3.162229  
42724, 16764, 1265.3166, 3.162074  
42725, 16122, 1265.2546, 3.161919  
42726, 15432, 1265.1927, 3.161764  
42727, 14658, 1265.1308, 3.161610  
42728, 13624, 1265.0689, 3.161455  
42729, 12456, 1265.0069, 3.161300  
42730, 11626, 1264.9450, 3.161145  
42731, 11498, 1264.8831, 3.160991  
42732, 11938, 1264.8211, 3.160836  
42733, 12408, 1264.7592, 3.160681  
42734, 12504, 1264.6973, 3.160526  
42735, 12370, 1264.6354, 3.160372  
42736, 12472, 1264.5734, 3.160217  
42737, 13030, 1264.5115, 3.160062  
42738, 13752, 1264.4496, 3.159907  
42739, 14132, 1264.3877, 3.159753  
42740, 14002, 1264.3257, 3.159598  
42741, 13682, 1264.2638, 3.159443  
42742, 13590, 1264.2019, 3.159288  
42743, 13774, 1264.1400, 3.159134  
42744, 13898, 1264.0780, 3.158979  
42745, 13668, 1264.0161, 3.158824  
42746, 13170, 1263.9542, 3.158669  
42747, 12758, 1263.8922, 3.158515  
42748, 12606, 1263.8303, 3.158360  
42749, 12530, 1263.7684, 3.158205  
42750, 12240, 1263.7065, 3.158050  
42751, 11706, 1263.6445, 3.157896  
42752, 11234, 1263.5826, 3.157741  
42753, 11138, 1263.5207, 3.157586  
42754, 11420, 1263.4588, 3.157431  
42755, 11854, 1263.3968, 3.157277  
42756, 12280, 1263.3349, 3.157122  
42757, 12748, 1263.2730, 3.156967  
42758, 13368, 1263.2110, 3.156812  
42759, 14028, 1263.1491, 3.156657  
42760, 14414, 1263.0872, 3.156503  
42761, 14310, 1263.0253, 3.156348  
42762, 13868, 1262.9633, 3.156193  
42763, 13492, 1262.9014, 3.156038  
42764, 13480, 1262.8395, 3.155884  
42765, 13820, 1262.7776, 3.155729  
42766, 14310, 1262.7156, 3.155574  
42767, 14788, 1262.6537, 3.155419  
42768, 15200, 1262.5918, 3.155265  
42769, 15452, 1262.5299, 3.155110  
42770, 15358, 1262.4679, 3.154955  
42771, 14846, 1262.4060, 3.154800  
42772, 14138, 1262.3441, 3.154646  
42773, 13636, 1262.2821, 3.154491  
42774, 13486, 1262.2202, 3.154336  
42775, 13346, 1262.1583, 3.154181  
42776, 12654, 1262.0964, 3.154027  
42777, 11222, 1262.0344, 3.153872  
42778, 9544, 1261.9725, 3.153717  
42779, 8436, 1261.9106, 3.153562  
42780, 8284, 1261.8487, 3.153408  
42781, 8734, 1261.7867, 3.153253  
42782, 9088, 1261.7248, 3.153098  
42783, 9004, 1261.6629, 3.152943  
42784, 8746, 1261.6009, 3.152789  
42785, 8798, 1261.5390, 3.152634  
42786, 9326, 1261.4771, 3.152479  
42787, 10072, 1261.4152, 3.152324  
42788, 10732, 1261.3532, 3.152170  
42789, 11300, 1261.2913, 3.152015  
42790, 11918, 1261.2294, 3.151860  
42791, 12526, 1261.1675, 3.151705  
42792, 12724, 1261.1055, 3.151550  
42793, 12208, 1261.0436, 3.151396  
42794, 11216, 1260.9817, 3.151241  
42795, 10440, 1260.9198, 3.151086  
42796, 10462, 1260.8578, 3.150931  
42797, 11188, 1260.7959, 3.150777  
42798, 11990, 1260.7340, 3.150622  
42799, 12298, 1260.6720, 3.150467  
42800, 12092, 1260.6101, 3.150312  
42801, 11770, 1260.5482, 3.150158  
42802, 11622, 1260.4863, 3.150003  
42803, 11558, 1260.4243, 3.149848  
42804, 11340, 1260.3624, 3.149693  
42805, 10988, 1260.3005, 3.149539  
42806, 10794, 1260.2386, 3.149384  
42807, 10980, 1260.1766, 3.149229  
42808, 11380, 1260.1147, 3.149074  
42809, 11584, 1260.0528, 3.148920  
42810, 11358, 1259.9908, 3.148765  
42811, 10890, 1259.9289, 3.148610  
42812, 10564, 1259.8670, 3.148455  
42813, 10552, 1259.8051, 3.148301  
42814, 10712, 1259.7431, 3.148146  
42815, 10848, 1259.6812, 3.147991  
42816, 10988, 1259.6193, 3.147836  
42817, 11294, 1259.5574, 3.147682  
42818, 11772, 1259.4954, 3.147527  
42819, 12146, 1259.4335, 3.147372  
42820, 12134, 1259.3716, 3.147217  
42821, 11746, 1259.3097, 3.147063  
42822, 11292, 1259.2477, 3.146908

42823, 11036, 1259.1858, 3.146753  
42824, 10910, 1259.1239, 3.146598  
42825, 10692, 1259.0619, 3.146443  
42826, 10368, 1259.0000, 3.146289  
42827, 10270, 1258.9381, 3.146134  
42828, 10690, 1258.8762, 3.145979  
42829, 11484, 1258.8142, 3.145824  
42830, 12094, 1258.7523, 3.145670  
42831, 12084, 1258.6904, 3.145515  
42832, 11558, 1258.6285, 3.145360  
42833, 11056, 1258.5665, 3.145205  
42834, 10962, 1258.5046, 3.145051  
42835, 11160, 1258.4427, 3.144896  
42836, 11236, 1258.3808, 3.144741  
42837, 11032, 1258.3188, 3.144586  
42838, 10814, 1258.2569, 3.144432  
42839, 10940, 1258.1950, 3.144277  
42840, 11368, 1258.1330, 3.144122  
42841, 11680, 1258.0711, 3.143967  
42842, 11566, 1258.0092, 3.143813  
42843, 11208, 1257.9473, 3.143658  
42844, 11090, 1257.8853, 3.143503  
42845, 11462, 1257.8234, 3.143348  
42846, 12066, 1257.7615, 3.143194  
42847, 12440, 1257.6996, 3.143039  
42848, 12422, 1257.6376, 3.142884  
42849, 12232, 1257.5757, 3.142729  
42850, 12082, 1257.5138, 3.142575  
42851, 11826, 1257.4518, 3.142420  
42852, 11150, 1257.3899, 3.142265  
42853, 10144, 1257.3280, 3.142110  
42854, 9470, 1257.2661, 3.141956  
42855, 9856, 1257.2041, 3.141801  
42856, 11308, 1257.1422, 3.141646  
42857, 12936, 1257.0803, 3.141491  
42858, 13678, 1257.0184, 3.141336  
42859, 13194, 1256.9564, 3.141182  
42860, 12122, 1256.8945, 3.141027  
42861, 11378, 1256.8326, 3.140872  
42862, 11340, 1256.7707, 3.140717  
42863, 11666, 1256.7087, 3.140563  
42864, 11834, 1256.6468, 3.140408  
42865, 11740, 1256.5849, 3.140253  
42866, 11716, 1256.5229, 3.140098  
42867, 12018, 1256.4610, 3.139944  
42868, 12502, 1256.3991, 3.139789  
42869, 12766, 1256.3372, 3.139634  
42870, 12588, 1256.2752, 3.139479  
42871, 12108, 1256.2133, 3.139325  
42872, 11578, 1256.1514, 3.139170  
42873, 11104, 1256.0895, 3.139015  
42874, 10626, 1256.0275, 3.138860  
42875, 10164, 1255.9656, 3.138706  
42876, 9896, 1255.9037, 3.138551  
42877, 9942, 1255.8417, 3.138396  
42878, 10148, 1255.7798, 3.138241  
42879, 10198, 1255.7179, 3.138087  
42880, 10000, 1255.6560, 3.137932  
42881, 9862, 1255.5940, 3.137777  
42882, 10192, 1255.5321, 3.137622  
42883, 11004, 1255.4702, 3.137468  
42884, 11848, 1255.4083, 3.137313  
42885, 12224, 1255.3463, 3.137158  
42886, 12082, 1255.2844, 3.137003  
42887, 11806, 1255.2225, 3.136849  
42888, 11718, 1255.1606, 3.136694  
42889, 11672, 1255.0986, 3.136539  
42890, 11250, 1255.0367, 3.136384  
42891, 10356, 1254.9748, 3.136229  
42892, 9470, 1254.9128, 3.136075  
42893, 9242, 1254.8509, 3.135920  
42894, 9810, 1254.7890, 3.135765  
42895, 10616, 1254.7271, 3.135610  
42896, 10986, 1254.6651, 3.135456  
42897, 10780, 1254.6032, 3.135301  
42898, 10506, 1254.5413, 3.135146  
42899, 10738, 1254.4794, 3.134991  
42900, 11518, 1254.4174, 3.134837  
42901, 12364, 1254.3555, 3.134682  
42902, 12818, 1254.2936, 3.134527  
42903, 12888, 1254.2316, 3.134372  
42904, 12900, 1254.1697, 3.134218  
42905, 13042, 1254.1078, 3.134063  
42906, 13168, 1254.0459, 3.133908  
42907, 13040, 1253.9839, 3.133753  
42908, 12648, 1253.9220, 3.133599  
42909, 12216, 1253.8601, 3.133444  
42910, 11852, 1253.7982, 3.133289  
42911, 11370, 1253.7362, 3.133134  
42912, 10564, 1253.6743, 3.132980  
42913, 9556, 1253.6124, 3.132825  
42914, 8856, 1253.5505, 3.132670  
42915, 8864, 1253.4885, 3.132515  
42916, 9472, 1253.4266, 3.132361  
42917, 10120, 1253.3647, 3.132206  
42918, 10368, 1253.3027, 3.132051  
42919, 10278, 1253.2408, 3.131896  
42920, 10254, 1253.1789, 3.131742  
42921, 10504, 1253.1170, 3.131587  
42922, 10808, 1253.0550, 3.131432  
42923, 10824, 1252.9931, 3.131277  
42924, 10562, 1252.9312, 3.131122  
42925, 10418, 1252.8693, 3.130968  
42926, 10708, 1252.8073, 3.130813  
42927, 11274, 1252.7454, 3.130658  
42928, 11628, 1252.6835, 3.130503  
42929, 11486, 1252.6215, 3.130349  
42930, 11096, 1252.5596, 3.130194  
42931, 10984, 1252.4977, 3.130039  
42932, 11354, 1252.4358, 3.129884  
42933, 11926, 1252.3738, 3.129730  
42934, 12254, 1252.3119, 3.129575  
42935, 12234, 1252.2500, 3.129420  
42936, 12154, 1252.1881, 3.129265  
42937, 12278, 1252.1261, 3.129111  
42938, 12492, 1252.0642, 3.128956  
42939, 12448, 1252.0023, 3.128801  
42940, 12024, 1251.9404, 3.128646  
42941, 11508, 1251.8784, 3.128492  
42942, 11302, 1251.8165, 3.128337  
42943, 11454, 1251.7546, 3.128182  
42944, 11550, 1251.6926, 3.128027  
42945, 11190, 1251.6307, 3.127873  
42946, 10392, 1251.5688, 3.127718  
42947, 9594, 1251.5069, 3.127563  
42948, 9186, 1251.4449, 3.127408  
42949, 9180, 1251.3830, 3.127254  
42950, 9326, 1251.3211, 3.127099  
42951, 9484, 1251.2592, 3.126944  
42952, 9778, 1251.1972, 3.126789  
42953, 10368, 1251.1353, 3.126635  
42954, 11132, 1251.0734, 3.126480  
42955, 11712, 1251.0114, 3.126325  
42956, 11886, 1250.9495, 3.126170  
42957, 11800, 1250.8876, 3.126015  
42958, 11794, 1250.8257, 3.125861  
42959, 12014, 1250.7637, 3.125706  
42960, 12270, 1250.7018, 3.125551  
42961, 12302, 1250.6399, 3.125396  
42962, 12112, 1250.5780, 3.125242  
42963, 11980, 1250.5160, 3.125087  
42964, 12072, 1250.4541, 3.124932  
42965, 12246, 1250.3922, 3.124777  
42966, 12186, 1250.3303, 3.124623  
42967, 11808, 1250.2683, 3.124468  
42968, 11410, 1250.2064, 3.124313  
42969, 11408, 1250.1445, 3.124158  
42970, 11920, 1250.0825, 3.124004  
42971, 12694, 1250.0206, 3.123849  
42972, 13416, 1249.9587, 3.123694  
42973, 14010, 1249.8968, 3.123539  
42974, 14570, 1249.8348, 3.123385  
42975, 15108, 1249.7729, 3.123230  
42976, 15416, 1249.7110, 3.123075  
42977, 15310, 1249.6491, 3.122920  
42978, 14880, 1249.5871, 3.122766  
42979, 14458, 1249.5252, 3.122611  
42980, 14214, 1249.4633, 3.122456  
42981, 13954, 1249.4013, 3.122301  
42982, 13318, 1249.3394, 3.122147  
42983, 12258, 1249.2775, 3.121992  
42984, 11152, 1249.2156, 3.121837  
42985, 10462, 1249.1536, 3.121682  
42986, 10248, 1249.0917, 3.121527  
42987, 10152, 1249.0298, 3.121373  
42988, 9866, 1248.9679, 3.121218  
42989, 9538, 1248.9059, 3.121063  
42990, 9636, 1248.8440, 3.120908  
42991, 10378, 1248.7821, 3.120754  
42992, 11370, 1248.7202, 3.120599  
42993, 11932, 1248.6582, 3.120444  
42994, 11748, 1248.5963, 3.120289  
42995, 11158, 1248.5344, 3.120135  
42996, 10790, 1248.4724, 3.119980  
42997, 10932, 1248.4105, 3.119825  
42998, 11320, 1248.3486, 3.119670  
42999, 11522, 1248.2867, 3.119516  
43000, 11398, 1248.2247, 3.119361  
43001, 11160, 1248.1628, 3.119206  
43002, 11002, 1248.1009, 3.119051  
43003, 10838, 1248.0390, 3.118897  
43004, 10490, 1247.9770, 3.118742  
43005, 9990, 1247.9151, 3.118587  
43006, 9620, 1247.8532, 3.118432  
43007, 9580, 1247.7912, 3.118278  
43008, 9668, 1247.7293, 3.118123  
43009, 9462, 1247.6674, 3.117968  
43010, 8856, 1247.6055, 3.117813  
43011, 8258, 1247.5435, 3.117659  
43012, 8260, 1247.4816, 3.117504  
43013, 8998, 1247.4197, 3.117349  
43014, 9946, 1247.3578, 3.117194  
43015, 10398, 1247.2958, 3.117040  
43016, 10102, 1247.2339, 3.116885  
43017, 9412, 1247.1720, 3.116730  
43018, 8868, 1247.1101, 3.116575  
43019, 8676, 1247.0481, 3.116420  
43020, 8694, 1246.9862, 3.116266  
43021, 8806, 1246.9243, 3.116111  
43022, 9134, 1246.8623, 3.115956  
43023, 9836, 1246.8004, 3.115801  
43024, 10688, 1246.7385, 3.115647  
43025, 11144, 1246.6766, 3.115492  
43026, 10818, 1246.6146, 3.115337  
43027, 9926, 1246.5527, 3.115182  
43028, 9142, 1246.4908, 3.115028  
43029, 8946, 1246.4289, 3.114873  
43030, 9186, 1246.3669, 3.114718  
43031, 9296, 1246.3050, 3.114563  
43032, 8966, 1246.2431, 3.114409  
43033, 8494, 1246.1811, 3.114254  
43034, 8434, 1246.1192, 3.114099  
43035, 8998, 1246.0573, 3.113944  
43036, 9824, 1245.9954, 3.113790  
43037, 10384, 1245.9334, 3.113635  
43038, 10530, 1245.8715, 3.113480  
43039, 10610, 1245.8096, 3.113325  
43040, 11024, 1245.7477, 3.113171  
43041, 11790, 1245.6857, 3.113016  
43042, 12560, 1245.6238, 3.112861  
43043, 12968, 1245.5619, 3.112706  
43044, 12956, 1245.5000, 3.112552  
43045, 12684, 1245.4380, 3.112397  
43046, 12278, 1245.3761, 3.112242  
43047, 11766, 1245.3142, 3.112087  
43048, 11180, 1245.2522, 3.111933  
43049, 10662, 1245.1903, 3.111778  
43050, 10338, 1245.1284, 3.111623

43051, 10136, 1245.0665, 3.111468  
43052, 9842, 1245.0045, 3.111313  
43053, 9388, 1244.9426, 3.111159  
43054, 9042, 1244.8807, 3.111004  
43055, 9190, 1244.8188, 3.110849  
43056, 9894, 1244.7568, 3.110694  
43057, 10732, 1244.6949, 3.110540  
43058, 11122, 1244.6330, 3.110385  
43059, 10872, 1244.5711, 3.110230  
43060, 10328, 1244.5091, 3.110075  
43061, 10016, 1244.4472, 3.109921  
43062, 10148, 1244.3853, 3.109766  
43063, 10500, 1244.3233, 3.109611  
43064, 10768, 1244.2614, 3.109456  
43065, 10898, 1244.1995, 3.109302  
43066, 11052, 1244.1376, 3.109147  
43067, 11302, 1244.0756, 3.108992  
43068, 11482, 1244.0137, 3.108837  
43069, 11432, 1243.9518, 3.108683  
43070, 11256, 1243.8899, 3.108528  
43071, 11262, 1243.8279, 3.108373  
43072, 11578, 1243.7660, 3.108218  
43073, 11874, 1243.7041, 3.108064  
43074, 11668, 1243.6421, 3.107909  
43075, 10844, 1243.5802, 3.107754  
43076, 9898, 1243.5183, 3.107599  
43077, 9504, 1243.4564, 3.107445  
43078, 9886, 1243.3944, 3.107290  
43079, 10612, 1243.3325, 3.107135  
43080, 11040, 1243.2706, 3.106980  
43081, 10940, 1243.2087, 3.106826  
43082, 10592, 1243.1467, 3.106671  
43083, 10388, 1243.0848, 3.106516  
43084, 10390, 1243.0229, 3.106361  
43085, 10384, 1242.9610, 3.106206  
43086, 10230, 1242.8990, 3.106052  
43087, 10104, 1242.8371, 3.105897  
43088, 10252, 1242.7752, 3.105742  
43089, 10624, 1242.7132, 3.105587  
43090, 10828, 1242.6513, 3.105433  
43091, 10564, 1242.5894, 3.105278  
43092, 9976, 1242.5275, 3.105123  
43093, 9574, 1242.4655, 3.104968  
43094, 9728, 1242.4036, 3.104814  
43095, 10344, 1242.3417, 3.104659  
43096, 11008, 1242.2798, 3.104504  
43097, 11414, 1242.2178, 3.104349  
43098, 11576, 1242.1559, 3.104195  
43099, 11628, 1242.0940, 3.104040  
43100, 11534, 1242.0320, 3.103885  
43101, 11152, 1241.9701, 3.103730  
43102, 10502, 1241.9082, 3.103576  
43103, 9920, 1241.8463, 3.103421  
43104, 9792, 1241.7843, 3.103266  
43105, 10126, 1241.7224, 3.103111  
43106, 10506, 1241.6605, 3.102957  
43107, 10536, 1241.5986, 3.102802  
43108, 10232, 1241.5366, 3.102647  
43109, 9984, 1241.4747, 3.102492  
43110, 10076, 1241.4128, 3.102338  
43111, 10364, 1241.3509, 3.102183  
43112, 10478, 1241.2889, 3.102028  
43113, 10328, 1241.2270, 3.101873  
43114, 10248, 1241.1651, 3.101719  
43115, 10610, 1241.1031, 3.101564  
43116, 11294, 1241.0412, 3.101409  
43117, 11714, 1240.9793, 3.101254  
43118, 11380, 1240.9174, 3.101099  
43119, 10458, 1240.8554, 3.100945  
43120, 9640, 1240.7935, 3.100790  
43121, 9488, 1240.7316, 3.100635  
43122, 9924, 1240.6697, 3.100480  
43123, 10394, 1240.6077, 3.100326  
43124, 10496, 1240.5458, 3.100171  
43125, 10342, 1240.4839, 3.100016  
43126, 10308, 1240.4219, 3.099861

43127, 10544, 1240.3600, 3.099707  
43128, 10804, 1240.2981, 3.099552  
43129, 10838, 1240.2362, 3.099397  
43130, 10766, 1240.1742, 3.099242  
43131, 10992, 1240.1123, 3.099088  
43132, 11706, 1240.0504, 3.098933  
43133, 12606, 1239.9885, 3.098778  
43134, 13134, 1239.9265, 3.098623  
43135, 13048, 1239.8646, 3.098469  
43136, 12628, 1239.8027, 3.098314  
43137, 12346, 1239.7408, 3.098159  
43138, 12356, 1239.6789, 3.098004  
43139, 12390, 1239.6169, 3.097850  
43140, 12102, 1239.5550, 3.097695  
43141, 11500, 1239.4930, 3.097540  
43142, 10924, 1239.4311, 3.097385  
43143, 10664, 1239.3692, 3.097231  
43144, 10702, 1239.3073, 3.097076  
43145, 10834, 1239.2453, 3.096921  
43146, 10970, 1239.1834, 3.096766  
43147, 11212, 1239.1215, 3.096612  
43148, 11622, 1239.0596, 3.096457  
43149, 11996, 1238.9976, 3.096302  
43150, 11940, 1238.9357, 3.096147  
43151, 11256, 1238.8738, 3.095992  
43152, 10152, 1238.8118, 3.095838  
43153, 9058, 1238.7499, 3.095683  
43154, 8300, 1238.6880, 3.095528  
43155, 7902, 1238.6261, 3.095373  
43156, 7774, 1238.5641, 3.095219  
43157, 7900, 1238.5022, 3.095064  
43158, 8322, 1238.4403, 3.094909  
43159, 8948, 1238.3784, 3.094754  
43160, 9528, 1238.3164, 3.094600  
43161, 9840, 1238.2545, 3.094445  
43162, 9978, 1238.1926, 3.094290  
43163, 10258, 1238.1307, 3.094135  
43164, 10892, 1238.0687, 3.093981  
43165, 11706, 1238.0068, 3.093826  
43166, 12290, 1237.9449, 3.093671  
43167, 12400, 1237.8829, 3.093516  
43168, 12176, 1237.8210, 3.093362  
43169, 11930, 1237.7591, 3.093207  
43170, 11778, 1237.6972, 3.093052  
43171, 11490, 1237.6352, 3.092897  
43172, 10812, 1237.5733, 3.092743  
43173, 9788, 1237.5114, 3.092588  
43174, 8774, 1237.4495, 3.092433  
43175, 8142, 1237.3875, 3.092278  
43176, 8006, 1237.3256, 3.092124  
43177, 8276, 1237.2637, 3.091969  
43178, 8902, 1237.2017, 3.091814  
43179, 9904, 1237.1398, 3.091659  
43180, 11168, 1237.0779, 3.091505  
43181, 12294, 1237.0160, 3.091350  
43182, 12792, 1236.9540, 3.091195  
43183, 12482, 1236.8921, 3.091040  
43184, 11728, 1236.8302, 3.090885  
43185, 11106, 1236.7683, 3.090731  
43186, 10914, 1236.7063, 3.090576  
43187, 10980, 1236.6444, 3.090421  
43188, 10970, 1236.5825, 3.090266  
43189, 10818, 1236.5206, 3.090112  
43190, 10780, 1236.4586, 3.089957  
43191, 11060, 1236.3967, 3.089802  
43192, 11516, 1236.3348, 3.089647  
43193, 11766, 1236.2728, 3.089493  
43194, 11596, 1236.2109, 3.089338  
43195, 11170, 1236.1490, 3.089183  
43196, 10802, 1236.0871, 3.089028  
43197, 10584, 1236.0251, 3.088874  
43198, 10352, 1235.9632, 3.088719  
43199, 10024, 1235.9013, 3.088564  
43200, 9840, 1235.8394, 3.088409  
43201, 10130, 1235.7774, 3.088255  
43202, 10876, 1235.7155, 3.088100

43203, 11530, 1235.6536, 3.087945  
43204, 11504, 1235.5916, 3.087790  
43205, 10786, 1235.5297, 3.087636  
43206, 10042, 1235.4678, 3.087481  
43207, 10026, 1235.4059, 3.087326  
43208, 10858, 1235.3439, 3.087171  
43209, 11936, 1235.2820, 3.087017  
43210, 12534, 1235.2201, 3.086862  
43211, 12470, 1235.1582, 3.086707  
43212, 12112, 1235.0962, 3.086552  
43213, 11900, 1235.0343, 3.086398  
43214, 11860, 1234.9724, 3.086243  
43215, 11698, 1234.9105, 3.086088  
43216, 11262, 1234.8485, 3.085933  
43217, 10766, 1234.7866, 3.085778  
43218, 10552, 1234.7247, 3.085624  
43219, 10696, 1234.6627, 3.085469  
43220, 10972, 1234.6008, 3.085314  
43221, 11152, 1234.5389, 3.085159  
43222, 11292, 1234.4770, 3.085005  
43223, 11562, 1234.4150, 3.084850  
43224, 11932, 1234.3531, 3.084695  
43225, 12054, 1234.2912, 3.084540  
43226, 11630, 1234.2293, 3.084386  
43227, 10794, 1234.1673, 3.084231  
43228, 10060, 1234.1054, 3.084076  
43229, 9850, 1234.0435, 3.083921  
43230, 10102, 1233.9815, 3.083767  
43231, 10364, 1233.9196, 3.083612  
43232, 10314, 1233.8577, 3.083457  
43233, 10056, 1233.7958, 3.083302  
43234, 9946, 1233.7338, 3.083148  
43235, 10168, 1233.6719, 3.082993  
43236, 10562, 1233.6100, 3.082838  
43237, 10880, 1233.5481, 3.082683  
43238, 11076, 1233.4861, 3.082529  
43239, 11296, 1233.4242, 3.082374  
43240, 11586, 1233.3623, 3.082219  
43241, 11716, 1233.3004, 3.082064  
43242, 11416, 1233.2384, 3.081910  
43243, 10696, 1233.1765, 3.081755  
43244, 9882, 1233.1146, 3.081600  
43245, 9274, 1233.0526, 3.081445  
43246, 8842, 1232.9907, 3.081291  
43247, 8322, 1232.9288, 3.081136  
43248, 7630, 1232.8669, 3.080981  
43249, 7036, 1232.8049, 3.080826  
43250, 6904, 1232.7430, 3.080671  
43251, 7278, 1232.6811, 3.080517  
43252, 7788, 1232.6192, 3.080362  
43253, 8100, 1232.5572, 3.080207  
43254, 8268, 1232.4953, 3.080052  
43255, 8644, 1232.4334, 3.079898  
43256, 9390, 1232.3714, 3.079743  
43257, 10168, 1232.3095, 3.079588  
43258, 10496, 1232.2476, 3.079433  
43259, 10266, 1232.1857, 3.079279  
43260, 9944, 1232.1237, 3.079124  
43261, 10088, 1232.0618, 3.078969  
43262, 10740, 1231.9999, 3.078814  
43263, 11376, 1231.9380, 3.078660  
43264, 11490, 1231.8760, 3.078505  
43265, 11154, 1231.8141, 3.078350  
43266, 10960, 1231.7522, 3.078195  
43267, 11374, 1231.6903, 3.078041  
43268, 12274, 1231.6283, 3.077886  
43269, 13098, 1231.5664, 3.077731  
43270, 13482, 1231.5045, 3.077576  
43271, 13558, 1231.4425, 3.077422  
43272, 13682, 1231.3806, 3.077267  
43273, 13922, 1231.3187, 3.077112  
43274, 13972, 1231.2568, 3.076957  
43275, 13516, 1231.1948, 3.076803  
43276, 12694, 1231.1329, 3.076648  
43277, 11994, 1231.0710, 3.076493  
43278, 11824, 1231.0091, 3.076338

43279, 12174, 1230.9471, 3.076183  
43280, 12766, 1230.8852, 3.076029  
43281, 13406, 1230.8233, 3.075874  
43282, 14104, 1230.7614, 3.075719  
43283, 14802, 1230.6994, 3.075564  
43284, 15200, 1230.6375, 3.075410  
43285, 14928, 1230.5756, 3.075255  
43286, 13978, 1230.5136, 3.075100  
43287, 12836, 1230.4517, 3.074945  
43288, 12102, 1230.3898, 3.074791  
43289, 11978, 1230.3279, 3.074636  
43290, 12204, 1230.2659, 3.074481  
43291, 12464, 1230.2040, 3.074326  
43292, 12762, 1230.1421, 3.074172  
43293, 13310, 1230.0802, 3.074017  
43294, 14064, 1229.9738, 3.073862  
43295, 14538, 1229.9119, 3.073707  
43296, 14232, 1229.8500, 3.073553  
43297, 13212, 1229.7881, 3.073398  
43298, 12208, 1229.7262, 3.073243  
43299, 11998, 1229.6643, 3.073088  
43300, 12696, 1229.6024, 3.072934  
43301, 13706, 1229.5405, 3.072779  
43302, 14320, 1229.4786, 3.072624  
43303, 14368, 1229.4167, 3.072469  
43304, 14176, 1229.3548, 3.072315  
43305, 14058, 1229.2929, 3.072160  
43306, 13956, 1229.2310, 3.072005  
43307, 13638, 1229.1691, 3.071850  
43308, 13126, 1229.1072, 3.071696  
43309, 12770, 1229.0453, 3.071541  
43310, 12850, 1229.0274, 3.071386  
43311, 13192, 1228.9635, 3.071231  
43312, 13330, 1228.9016, 3.071076  
43313, 13048, 1228.8397, 3.070922  
43314, 12654, 1228.7778, 3.070767  
43315, 12642, 1228.7159, 3.070612  
43316, 13104, 1228.6540, 3.070457  
43317, 13634, 1228.5921, 3.070303  
43318, 13802, 1228.5302, 3.070148  
43319, 13714, 1228.4683, 3.069993  
43320, 13874, 1228.4064, 3.069838  
43321, 14620, 1228.3445, 3.069684  
43322, 15634, 1228.2826, 3.069529  
43323, 16240, 1228.2207, 3.069374  
43324, 16084, 1228.1588, 3.069219  
43325, 15468, 1228.0969, 3.069065  
43326, 14908, 1228.0350, 3.068910  
43327, 14526, 1227.9731, 3.068755  
43328, 13942, 1227.9112, 3.068600  
43329, 12856, 1227.8493, 3.068446  
43330, 11566, 1227.7874, 3.068291  
43331, 10782, 1227.7255, 3.068136  
43332, 10874, 1227.6636, 3.067981  
43333, 11460, 1227.6017, 3.067827  
43334, 11752, 1227.5398, 3.067672  
43335, 11388, 1227.4779, 3.067517  
43336, 10760, 1227.4160, 3.067362  
43337, 10534, 1227.3541, 3.067208  
43338, 10938, 1227.2922, 3.067053  
43339, 11580, 1227.2303, 3.066898  
43340, 11968, 1227.1684, 3.066743  
43341, 12016, 1227.1065, 3.066589  
43342, 12008, 1227.0446, 3.066434  
43343, 12050, 1226.9827, 3.066279  
43344, 11856, 1226.9208, 3.066124  
43345, 11112, 1226.8589, 3.065969  
43346, 10034, 1226.7970, 3.065815  
43347, 9312, 1226.7351, 3.065660  
43348, 9440, 1226.6732, 3.065505  
43349, 10132, 1226.6113, 3.065350  
43350, 10552, 1226.5494, 3.065196  
43351, 10146, 1226.4875, 3.065041  
43352, 9218, 1226.4256, 3.064886  
43353, 8578, 1226.3637, 3.064731  
43354, 8656, 1226.3018, 3.064577  
43355, 9116, 1226.2400, 3.064422  
43356, 9298, 1226.1781, 3.064267  
43357, 9030, 1226.1162, 3.064112  
43358, 8794, 1226.0543, 3.063958  
43359, 9114, 1225.9924, 3.063803  
43360, 9872, 1225.9305, 3.063648  
43361, 10368, 1225.8686, 3.063493  
43362, 10042, 1225.8067, 3.063339  
43363, 9098, 1225.7448, 3.063184  
43364, 8224, 1225.6829, 3.063029  
43365, 7896, 1225.6210, 3.062874  
43366, 7962, 1225.5591, 3.062720  
43367, 7962, 1225.4972, 3.062565  
43368, 7778, 1225.4353, 3.062410  
43369, 7780, 1225.3734, 3.062255  
43370, 8372, 1225.3115, 3.062101  
43371, 9480, 1225.2496, 3.061946  
43372, 10568, 1225.1877, 3.061791  
43373, 11170, 1225.1258, 3.061636  
43374, 11252, 1225.0639, 3.061482  
43375, 11074, 1225.0020, 3.061327  
43376, 10758, 1224.9401, 3.061172  
43377, 10180, 1224.8782, 3.061017  
43378, 9304, 1224.8163, 3.060862  
43379, 8462, 1224.7544, 3.060708  
43380, 8158, 1224.6925, 3.060553  
43381, 8530, 1224.6306, 3.060398  
43382, 9124, 1224.5687, 3.060243  
43383, 9304, 1224.5068, 3.060089  
43384, 8886, 1224.4449, 3.059934  
43385, 8336, 1224.3830, 3.059779  
43386, 8264, 1224.3211, 3.059624  
43387, 8830, 1224.2592, 3.059470  
43388, 9652, 1224.1973, 3.059315  
43389, 10294, 1224.1354, 3.059160  
43390, 10736, 1224.0735, 3.059005  
43391, 11292, 1224.0116, 3.058851  
43392, 12120, 1223.9497, 3.058696  
43393, 12950, 1223.8878, 3.058541  
43394, 13384, 1223.8259, 3.058386  
43395, 13322, 1223.7640, 3.058232  
43396, 13076, 1223.7021, 3.058077  
43397, 12974, 1223.6402, 3.057922  
43398, 12976, 1223.5783, 3.057767  
43399, 12752, 1223.5164, 3.057613  
43400, 12114, 1223.4545, 3.057458  
43401, 11264, 1223.3926, 3.057303  
43402, 10584, 1223.3307, 3.057148  
43403, 10250, 1223.2688, 3.056994  
43404, 10166, 1223.2069, 3.056839  
43405, 10238, 1223.1450, 3.056684  
43406, 10652, 1223.0831, 3.056529  
43407, 11646, 1223.0212, 3.056375  
43408, 13090, 1222.9593, 3.056220  
43409, 14360, 1222.8974, 3.056065  
43410, 14780, 1222.8355, 3.055910  
43411, 14224, 1222.7736, 3.055755  
43412, 13208, 1222.7117, 3.055601  
43413, 12380, 1222.6498, 3.055446  
43414, 11962, 1222.5879, 3.055291  
43415, 11698, 1222.5260, 3.055136  
43416, 11348, 1222.4641, 3.054982  
43417, 11016, 1222.4022, 3.054827  
43418, 10988, 1222.3403, 3.054672  
43419, 11268, 1222.2784, 3.054517  
43420, 11480, 1222.2165, 3.054363  
43421, 11256, 1222.1546, 3.054208  
43422, 10716, 1222.0927, 3.054053  
43423, 10382, 1222.0308, 3.053898  
43424, 10598, 1221.9689, 3.053744  
43425, 11124, 1221.9070, 3.053589  
43426, 11390, 1221.8451, 3.053434  
43427, 11136, 1221.7832, 3.053279  
43428, 10730, 1221.7213, 3.053125  
43429, 10726, 1221.6594, 3.052970  
43430, 11226, 1221.5975, 3.052815  
43431, 11724, 1221.5356, 3.052660  
43432, 11652, 1221.4737, 3.052506  
43433, 11018, 1221.4118, 3.052351  
43434, 10348, 1221.3499, 3.052196  
43435, 10082, 1221.2880, 3.052041  
43436, 10070, 1221.2261, 3.051887  
43437, 9798, 1221.1642, 3.051732  
43438, 9072, 1221.1023, 3.051577  
43439, 8342, 1221.0404, 3.051422  
43440, 8304, 1220.9785, 3.051268  
43441, 9176, 1220.9166, 3.051113  
43442, 10460, 1220.8547, 3.050958  
43443, 11466, 1220.7928, 3.050803  
43444, 11916, 1220.7309, 3.050648  
43445, 12088, 1220.6690, 3.050494  
43446, 12306, 1220.6071, 3.050339  
43447, 12520, 1220.5452, 3.050184  
43448, 12376, 1220.4833, 3.050029  
43449, 11690, 1220.4214, 3.049875  
43450, 10694, 1220.3595, 3.049720  
43451, 9788, 1220.2976, 3.049565  
43452, 9130, 1220.2357, 3.049410  
43453, 8548, 1220.1738, 3.049256  
43454, 7880, 1220.1119, 3.049101  
43455, 7270, 1220.0500, 3.048946  
43456, 7050, 1219.9881, 3.048791  
43457, 7362, 1219.9262, 3.048637  
43458, 7998, 1219.8643, 3.048482  
43459, 8648, 1219.8024, 3.048327  
43460, 9304, 1219.7405, 3.048172  
43461, 10222, 1219.6786, 3.048018  
43462, 11520, 1219.6167, 3.047863  
43463, 12880, 1219.5548, 3.047708  
43464, 13738, 1219.4929, 3.047553  
43465, 13812, 1219.4310, 3.047399  
43466, 13392, 1219.3691, 3.047244  
43467, 13050, 1219.3072, 3.047089  
43468, 13126, 1219.2453, 3.046934  
43469, 13492, 1219.1834, 3.046780  
43470, 13830, 1219.1215, 3.046625  
43471, 13996, 1219.0596, 3.046470  
43472, 14050, 1218.9977, 3.046315  
43473, 13996, 1218.9358, 3.046161  
43474, 13654, 1218.8739, 3.046006  
43475, 12858, 1218.8120, 3.045851  
43476, 11820, 1218.7501, 3.045696  
43477, 11046, 1218.6882, 3.045541  
43478, 10910, 1218.6263, 3.045387  
43479, 11252, 1218.5644, 3.045232  
43480, 11506, 1218.5025, 3.045077  
43481, 11284, 1218.4406, 3.044922  
43482, 10726, 1218.3787, 3.044768  
43483, 10314, 1218.3168, 3.044613  
43484, 10334, 1218.2549, 3.044458  
43485, 10602, 1218.1930, 3.044303  
43486, 10738, 1218.1311, 3.044149  
43487, 10606, 1218.0692, 3.043994  
43488, 10402, 1218.0073, 3.043839  
43489, 10318, 1217.9454, 3.043684  
43490, 10218, 1217.8835, 3.043530  
43491, 9786, 1217.8216, 3.043375  
43492, 8936, 1217.7597, 3.043220  
43493, 8050, 1217.6978, 3.043065  
43494, 7680, 1217.6359, 3.042911  
43495, 8046, 1217.5740, 3.042756  
43496, 8888, 1217.5121, 3.042601  
43497, 9780, 1217.4502, 3.042446  
43498, 10546, 1217.3883, 3.042292  
43499, 11264, 1217.3264, 3.042137  
43500, 11984, 1217.2645, 3.041982  
43501, 12534, 1217.2026, 3.041827  
43502, 12702, 1217.1407, 3.041673  
43503, 12530, 1217.0788, 3.041518  
43504, 12324, 1217.0169, 3.041363  
43505, 12300, 1216.9550, 3.041208  
43506, 12270, 1216.8931, 3.041054

43507, 11848, 1216.8278, 3.040899  
43508, 10932, 1216.7659, 3.040744  
43509, 9954, 1216.7039, 3.040589  
43510, 9526, 1216.6420, 3.040434  
43511, 9850, 1216.5801, 3.040280  
43512, 10522, 1216.5182, 3.040125  
43513, 10950, 1216.4562, 3.039970  
43514, 10924, 1216.3943, 3.039815  
43515, 10754, 1216.3324, 3.039661  
43516, 10786, 1216.2705, 3.039506  
43517, 10996, 1216.2085, 3.039351  
43518, 11022, 1216.1466, 3.039196  
43519, 10650, 1216.0847, 3.039042  
43520, 10118, 1216.0227, 3.038887  
43521, 9902, 1215.9608, 3.038732  
43522, 10204, 1215.8989, 3.038577  
43523, 10776, 1215.8370, 3.038423  
43524, 11222, 1215.7750, 3.038268  
43525, 11398, 1215.7131, 3.038113  
43526, 11488, 1215.6512, 3.037958  
43527, 11684, 1215.5893, 3.037804  
43528, 11926, 1215.5273, 3.037649  
43529, 12014, 1215.4654, 3.037494  
43530, 11908, 1215.4035, 3.037339  
43531, 11790, 1215.3416, 3.037185  
43532, 11830, 1215.2796, 3.037030  
43533, 11950, 1215.2177, 3.036875  
43534, 11938, 1215.1558, 3.036720  
43535, 11792, 1215.0938, 3.036566  
43536, 11806, 1215.0319, 3.036411  
43537, 12230, 1214.9700, 3.036256  
43538, 12838, 1214.9081, 3.036101  
43539, 13042, 1214.8461, 3.035947  
43540, 12454, 1214.7842, 3.035792  
43541, 11372, 1214.7223, 3.035637  
43542, 10542, 1214.6604, 3.035482  
43543, 10428, 1214.5984, 3.035327  
43544, 10710, 1214.5365, 3.035173  
43545, 10638, 1214.4746, 3.035018  
43546, 9860, 1214.4126, 3.034863  
43547, 8820, 1214.3507, 3.034708  
43548, 8338, 1214.2888, 3.034554  
43549, 8786, 1214.2269, 3.034399  
43550, 9740, 1214.1649, 3.034244  
43551, 10488, 1214.1030, 3.034089  
43552, 10720, 1214.0411, 3.033935  
43553, 10726, 1213.9792, 3.033780  
43554, 10942, 1213.9172, 3.033625  
43555, 11454, 1213.8553, 3.033470  
43556, 12004, 1213.7934, 3.033316  
43557, 12434, 1213.7315, 3.033161  
43558, 12888, 1213.6695, 3.033006  
43559, 13556, 1213.6076, 3.032851  
43560, 14260, 1213.5457, 3.032697  
43561, 14486, 1213.4837, 3.032542  
43562, 13890, 1213.4218, 3.032387  
43563, 12758, 1213.3599, 3.032232  
43564, 11786, 1213.2980, 3.032078  
43565, 11456, 1213.2360, 3.031923  
43566, 11638, 1213.1741, 3.031768  
43567, 11850, 1213.1122, 3.031613  
43568, 11858, 1213.0503, 3.031459  
43569, 11904, 1212.9883, 3.031304  
43570, 12296, 1212.9264, 3.031149  
43571, 12910, 1212.8645, 3.030994  
43572, 13168, 1212.8025, 3.030839  
43573, 12642, 1212.7406, 3.030685  
43574, 11498, 1212.6787, 3.030530  
43575, 10422, 1212.6168, 3.030375  
43576, 10016, 1212.5548, 3.030220  
43577, 10376, 1212.4929, 3.030066  
43578, 11210, 1212.4310, 3.029911  
43579, 12226, 1212.3691, 3.029756  
43580, 13318, 1212.3071, 3.029601  
43581, 14354, 1212.2452, 3.029447  
43582, 15012, 1212.1833, 3.029292

43583, 14960, 1212.1214, 3.029137  
43584, 14242, 1212.0594, 3.028982  
43585, 13392, 1211.9975, 3.028828  
43586, 12974, 1211.9356, 3.028673  
43587, 13068, 1211.8736, 3.028518  
43588, 13242, 1211.8117, 3.028363  
43589, 13064, 1211.7498, 3.028209  
43590, 12594, 1211.6879, 3.028054  
43591, 12316, 1211.6259, 3.027899  
43592, 12562, 1211.5640, 3.027744  
43593, 13124, 1211.5021, 3.027590  
43594, 13482, 1211.4402, 3.027435  
43595, 13368, 1211.3782, 3.027280  
43596, 13020, 1211.3163, 3.027125  
43597, 12838, 1211.2544, 3.026971  
43598, 12884, 1211.1924, 3.026816  
43599, 12824, 1211.1305, 3.026661  
43600, 12358, 1211.0686, 3.026506  
43601, 11610, 1211.0067, 3.026352  
43602, 10988, 1210.9447, 3.026197  
43603, 10688, 1210.8828, 3.026042  
43604, 10424, 1210.8209, 3.025887  
43605, 9804, 1210.7590, 3.025732  
43606, 8816, 1210.6970, 3.025578  
43607, 7952, 1210.6351, 3.025423  
43608, 7710, 1210.5732, 3.025268  
43609, 8094, 1210.5113, 3.025113  
43610, 8630, 1210.4493, 3.024959  
43611, 8906, 1210.3874, 3.024804  
43612, 8970, 1210.3255, 3.024649  
43613, 9192, 1210.2635, 3.024494  
43614, 9750, 1210.2016, 3.024340  
43615, 10396, 1210.1397, 3.024185  
43616, 10758, 1210.0778, 3.024030  
43617, 10816, 1210.0158, 3.023875  
43618, 10950, 1209.9539, 3.023721  
43619, 11522, 1209.8920, 3.023566  
43620, 12464, 1209.8301, 3.023411  
43621, 13356, 1209.7681, 3.023256  
43622, 13900, 1209.7062, 3.023102  
43623, 14188, 1209.6443, 3.022947  
43624, 14502, 1209.5823, 3.022792  
43625, 14918, 1209.5204, 3.022637  
43626, 15210, 1209.4585, 3.022483  
43627, 15160, 1209.3966, 3.022328  
43628, 14878, 1209.3346, 3.022173  
43629, 14754, 1209.2727, 3.022018  
43630, 15010, 1209.2108, 3.021864  
43631, 15482, 1209.1489, 3.021709  
43632, 15818, 1209.0869, 3.021554  
43633, 15866, 1209.0250, 3.021399  
43634, 15778, 1208.9631, 3.021245  
43635, 15722, 1208.9012, 3.021090  
43636, 15588, 1208.8392, 3.020935  
43637, 15102, 1208.7773, 3.020780  
43638, 14204, 1208.7154, 3.020625  
43639, 13220, 1208.6534, 3.020471  
43640, 12556, 1208.5915, 3.020316  
43641, 12234, 1208.5296, 3.020161  
43642, 11840, 1208.4677, 3.020006  
43643, 11012, 1208.4057, 3.019852  
43644, 9874, 1208.3438, 3.019697  
43645, 8978, 1208.2819, 3.019542  
43646, 8722, 1208.2200, 3.019387  
43647, 8942, 1208.1580, 3.019233  
43648, 9138, 1208.0961, 3.019078  
43649, 9036, 1208.0342, 3.018923  
43650, 8894, 1207.9722, 3.018768  
43651, 9138, 1207.9103, 3.018614  
43652, 9802, 1207.8484, 3.018459  
43653, 10458, 1207.7865, 3.018304  
43654, 10674, 1207.7245, 3.018149  
43655, 10522, 1207.6626, 3.017995  
43656, 10496, 1207.6007, 3.017840  
43657, 10962, 1207.5388, 3.017685  
43658, 11716, 1207.4768, 3.017530

43659, 12218, 1207.4149, 3.017376  
43660, 12136, 1207.3530, 3.017221  
43661, 11632, 1207.2911, 3.017066  
43662, 11086, 1207.2291, 3.016911  
43663, 10632, 1207.1672, 3.016757  
43664, 10096, 1207.1053, 3.016602  
43665, 9382, 1207.0433, 3.016447  
43666, 8790, 1206.9814, 3.016292  
43667, 8798, 1206.9195, 3.016138  
43668, 9560, 1206.8576, 3.015983  
43669, 10660, 1206.7956, 3.015828  
43670, 11486, 1206.7337, 3.015673  
43671, 11800, 1206.6718, 3.015518  
43672, 11912, 1206.6099, 3.015364  
43673, 12232, 1206.5479, 3.015209  
43674, 12784, 1206.4860, 3.015054  
43675, 13194, 1206.4241, 3.014899  
43676, 13120, 1206.3621, 3.014745  
43677, 12660, 1206.3002, 3.014590  
43678, 12182, 1206.2383, 3.014435  
43679, 11952, 1206.1764, 3.014280  
43680, 11884, 1206.1144, 3.014126  
43681, 11808, 1206.0525, 3.013971  
43682, 11750, 1205.9906, 3.013816  
43683, 11898, 1205.9287, 3.013661  
43684, 12236, 1205.8667, 3.013507  
43685, 12366, 1205.8048, 3.013352  
43686, 11832, 1205.7429, 3.013197  
43687, 10628, 1205.6810, 3.013042  
43688, 9338, 1205.6190, 3.012888  
43689, 8624, 1205.5571, 3.012733  
43690, 8648, 1205.4952, 3.012578  
43691, 9006, 1205.4332, 3.012423  
43692, 9244, 1205.3713, 3.012269  
43693, 9364, 1205.3094, 3.012114  
43694, 9752, 1205.2475, 3.011959  
43695, 10618, 1205.1855, 3.011804  
43696, 11620, 1205.1236, 3.011650  
43697, 12150, 1205.0617, 3.011495  
43698, 11946, 1204.9998, 3.011340  
43699, 11366, 1204.9378, 3.011185  
43700, 11004, 1204.8759, 3.011031  
43701, 11128, 1204.8140, 3.010876  
43702, 11460, 1204.7521, 3.010721  
43703, 11608, 1204.6901, 3.010566  
43704, 11486, 1204.6282, 3.010411  
43705, 11386, 1204.5663, 3.010257  
43706, 11588, 1204.5043, 3.010102  
43707, 12068, 1204.4424, 3.009947  
43708, 12584, 1204.3805, 3.009792  
43709, 12994, 1204.3186, 3.009638  
43710, 13380, 1204.2566, 3.009483  
43711, 13802, 1204.1947, 3.009328  
43712, 14096, 1204.1328, 3.009173  
43713, 13970, 1204.0709, 3.009019  
43714, 13350, 1204.0089, 3.008864  
43715, 12548, 1203.9470, 3.008709  
43716, 11996, 1203.8851, 3.008554  
43717, 11854, 1203.8231, 3.008400  
43718, 11896, 1203.7612, 3.008245  
43719, 11826, 1203.6993, 3.008090  
43720, 11582, 1203.6374, 3.007935  
43721, 11338, 1203.5754, 3.007781  
43722, 11174, 1203.5135, 3.007626  
43723, 10926, 1203.4516, 3.007471  
43724, 10372, 1203.3897, 3.007316  
43725, 9624, 1203.3277, 3.007162  
43726, 9120, 1203.2658, 3.007007  
43727, 9262, 1203.2039, 3.006852  
43728, 9996, 1203.1420, 3.006697  
43729, 10832, 1203.0800, 3.006543  
43730, 11278, 1203.0181, 3.006388  
43731, 11208, 1202.9562, 3.006233  
43732, 10838, 1202.8942, 3.006078  
43733, 10390, 1202.8323, 3.005924  
43734, 9884, 1202.7704, 3.005769

43735, 9300, 1202.7085, 3.005614  
43736, 8812, 1202.6465, 3.005459  
43737, 8742, 1202.5846, 3.005304  
43738, 9250, 1202.5227, 3.005150  
43739, 10118, 1202.4608, 3.004995  
43740, 10936, 1202.3988, 3.004840  
43741, 11530, 1202.3369, 3.004685  
43742, 12062, 1202.2750, 3.004531  
43743, 12744, 1202.2130, 3.004376  
43744, 13472, 1202.1511, 3.004221  
43745, 13862, 1202.0892, 3.004066  
43746, 13674, 1202.0731, 3.003912  
43747, 13116, 1201.9653, 3.003757  
43748, 12664, 1201.9034, 3.003602  
43749, 12552, 1201.8415, 3.003447  
43750, 12528, 1201.7796, 3.003293  
43751, 12194, 1201.7176, 3.003138  
43752, 11520, 1201.6557, 3.002983  
43753, 10990, 1201.5938, 3.002828  
43754, 11154, 1201.5319, 3.002674  
43755, 12092, 1201.4699, 3.002519  
43756, 13356, 1201.4080, 3.002364  
43757, 14410, 1201.3461, 3.002209  
43758, 15104, 1201.2841, 3.002055  
43759, 15620, 1201.2222, 3.001900  
43760, 16090, 1201.1603, 3.001745  
43761, 16388, 1201.0984, 3.001590  
43762, 16290, 1201.0364, 3.001436  
43763, 15860, 1200.9745, 3.001281  
43764, 15436, 1200.9126, 3.001126  
43765, 15264, 1200.8507, 3.000971  
43766, 15180, 1200.7887, 3.000817  
43767, 14790, 1200.7268, 3.000662  
43768, 13922, 1200.6649, 3.000507  
43769, 12928, 1200.6029, 3.000352  
43770, 12338, 1200.5410, 3.000197  
43771, 12336, 1200.4791, 3.000043  
43772, 12552, 1200.4172, 2.999888  
43773, 12446, 1200.3552, 2.999733  
43774, 11874, 1200.2933, 2.999578  
43775, 11194, 1200.2314, 2.999424  
43776, 10882, 1200.1695, 2.999269  
43777, 11072, 1200.1075, 2.999114  
43778, 11478, 1200.0456, 2.998959  
43779, 11758, 1199.9837, 2.998805  
43780, 11794, 1199.9218, 2.998650  
43781, 11680, 1199.8598, 2.998495  
43782, 11482, 1199.7979, 2.998340  
43783, 11172, 1199.7360, 2.998186  
43784, 10732, 1199.6740, 2.998031  
43785, 10334, 1199.6121, 2.997876  
43786, 10204, 1199.5502, 2.997721  
43787, 10400, 1199.4883, 2.997567  
43788, 10718, 1199.4263, 2.997412  
43789, 10922, 1199.3644, 2.997257  
43790, 10966, 1199.3025, 2.997102  
43791, 10980, 1199.2406, 2.996948  
43792, 11020, 1199.1786, 2.996793  
43793, 10940, 1199.1167, 2.996638  
43794, 10572, 1199.0548, 2.996483  
43795, 10030, 1198.9928, 2.996329  
43796, 9700, 1198.9309, 2.996174  
43797, 9884, 1198.8690, 2.996019  
43798, 10484, 1198.8071, 2.995864  
43799, 11086, 1198.7451, 2.995710  
43800, 11414, 1198.6832, 2.995555  
43801, 11618, 1198.6213, 2.995400  
43802, 12040, 1198.5594, 2.995245  
43803, 12728, 1198.4974, 2.995090  
43804, 13312, 1198.4355, 2.994936  
43805, 13362, 1198.3736, 2.994781  
43806, 12882, 1198.3117, 2.994626  
43807, 12328, 1198.2497, 2.994471  
43808, 12124, 1198.1878, 2.994317  
43809, 12194, 1198.1259, 2.994162  
43810, 12102, 1198.0639, 2.994007

43811, 11610, 1198.0020, 2.993852  
43812, 11006, 1197.9401, 2.993698  
43813, 10810, 1197.8782, 2.993543  
43814, 11164, 1197.8162, 2.993388  
43815, 11636, 1197.7543, 2.993233  
43816, 11652, 1197.6924, 2.993079  
43817, 11138, 1197.6305, 2.992924  
43818, 10570, 1197.5685, 2.992769  
43819, 10426, 1197.5066, 2.992614  
43820, 10672, 1197.4447, 2.992460  
43821, 10808, 1197.3827, 2.992305  
43822, 10486, 1197.3208, 2.992150  
43823, 9890, 1197.2589, 2.991995  
43824, 9522, 1197.1970, 2.991841  
43825, 9628, 1197.1350, 2.991686  
43826, 9944, 1197.0731, 2.991531  
43827, 10052, 1197.0112, 2.991376  
43828, 9854, 1196.9493, 2.991222  
43829, 9650, 1196.8873, 2.991067  
43830, 9694, 1196.8254, 2.990912  
43831, 9844, 1196.7635, 2.990757  
43832, 9746, 1196.7016, 2.990602  
43833, 9312, 1196.6396, 2.990448  
43834, 8886, 1196.5777, 2.990293  
43835, 8912, 1196.5158, 2.990138  
43836, 9402, 1196.4538, 2.989983  
43837, 9922, 1196.3919, 2.989829  
43838, 10110, 1196.3300, 2.989674  
43839, 10072, 1196.2681, 2.989519  
43840, 10278, 1196.2061, 2.989364  
43841, 10926, 1196.1442, 2.989210  
43842, 11656, 1196.0823, 2.989055  
43843, 11854, 1196.0204, 2.988900  
43844, 11306, 1195.9584, 2.988745  
43845, 10420, 1195.8965, 2.988591  
43846, 9778, 1195.8346, 2.988436  
43847, 9556, 1195.7726, 2.988281  
43848, 9442, 1195.7107, 2.988126  
43849, 9118, 1195.6488, 2.987972  
43850, 8728, 1195.5869, 2.987817  
43851, 8708, 1195.5249, 2.987662  
43852, 9254, 1195.4630, 2.987507  
43853, 10002, 1195.4011, 2.987353  
43854, 10384, 1195.3392, 2.987198  
43855, 10230, 1195.2772, 2.987043  
43856, 9942, 1195.2153, 2.986888  
43857, 10042, 1195.1534, 2.986734  
43858, 10616, 1195.0915, 2.986579  
43859, 11214, 1195.0295, 2.986424  
43860, 11340, 1194.9676, 2.986269  
43861, 10898, 1194.9057, 2.986115  
43862, 10206, 1194.8437, 2.985960  
43863, 9588, 1194.7818, 2.985805  
43864, 9132, 1194.7199, 2.985650  
43865, 8788, 1194.6580, 2.985495  
43866, 8662, 1194.5960, 2.985341  
43867, 8950, 1194.5341, 2.985186  
43868, 9684, 1194.4722, 2.985031  
43869, 10554, 1194.4103, 2.984876  
43870, 11150, 1194.3483, 2.984722  
43871, 11374, 1194.2864, 2.984567  
43872, 11502, 1194.2245, 2.984412  
43873, 11810, 1194.1625, 2.984257  
43874, 12182, 1194.1006, 2.984103  
43875, 12196, 1194.0387, 2.983948  
43876, 11614, 1193.9768, 2.983793  
43877, 10752, 1193.9148, 2.983638  
43878, 10236, 1193.8529, 2.983484  
43879, 10398, 1193.7910, 2.983329  
43880, 10986, 1193.7291, 2.983174  
43881, 11444, 1193.6671, 2.983019  
43882, 11522, 1193.6052, 2.982865  
43883, 11432, 1193.5433, 2.982710  
43884, 11538, 1193.4814, 2.982555  
43885, 11866, 1193.4194, 2.982400  
43886, 12126, 1193.3575, 2.982246

43887, 12092, 1193.2956, 2.982091  
43888, 11884, 1193.2336, 2.981936  
43889, 11806, 1193.1717, 2.981781  
43890, 11904, 1193.1098, 2.981627  
43891, 11898, 1193.0479, 2.981472  
43892, 11546, 1192.9859, 2.981317  
43893, 11040, 1192.9240, 2.981162  
43894, 10896, 1192.8621, 2.981008  
43895, 11414, 1192.8002, 2.980853  
43896, 12342, 1192.7382, 2.980698  
43897, 13114, 1192.6763, 2.980543  
43898, 13456, 1192.6144, 2.980388  
43899, 13654, 1192.5524, 2.980234  
43900, 14146, 1192.4905, 2.980079  
43901, 14964, 1192.4286, 2.979924  
43902, 15622, 1192.3667, 2.979769  
43903, 15642, 1192.3047, 2.979615  
43904, 15120, 1192.2428, 2.979460  
43905, 14638, 1192.1809, 2.979305  
43906, 14646, 1192.1190, 2.979150  
43907, 14952, 1192.0570, 2.978996  
43908, 14944, 1191.9951, 2.978841  
43909, 14206, 1191.9332, 2.978686  
43910, 12940, 1191.8713, 2.978531  
43911, 11738, 1191.8093, 2.978377  
43912, 11004, 1191.7474, 2.978222  
43913, 10712, 1191.6855, 2.978067  
43914, 10636, 1191.6235, 2.977912  
43915, 10716, 1191.5616, 2.977758  
43916, 11086, 1191.4997, 2.977603  
43917, 11732, 1191.4378, 2.977448  
43918, 12332, 1191.3758, 2.977293  
43919, 12486, 1191.3139, 2.977139  
43920, 12106, 1191.2520, 2.976984  
43921, 11538, 1191.1901, 2.976829  
43922, 11204, 1191.1281, 2.976674  
43923, 11228, 1191.0662, 2.976520  
43924, 11384, 1191.0043, 2.976365  
43925, 11468, 1190.9424, 2.976210  
43926, 11524, 1190.8804, 2.976055  
43927, 11728, 1190.8185, 2.975901  
43928, 12088, 1190.7566, 2.975746  
43929, 12354, 1190.6946, 2.975591  
43930, 12324, 1190.6327, 2.975436  
43931, 12100, 1190.5708, 2.975281  
43932, 12008, 1190.5089, 2.975127  
43933, 12214, 1190.4469, 2.974972  
43934, 12514, 1190.3850, 2.974817  
43935, 12536, 1190.3231, 2.974662  
43936, 12168, 1190.2612, 2.974508  
43937, 11672, 1190.1992, 2.974353  
43938, 11358, 1190.1373, 2.974198  
43939, 11246, 1190.0754, 2.974043  
43940, 11074, 1190.0134, 2.973889  
43941, 10716, 1189.9515, 2.973734  
43942, 10436, 1189.8896, 2.973579  
43943, 10668, 1189.8277, 2.973424  
43944, 11542, 1189.7657, 2.973270  
43945, 12686, 1189.7038, 2.973115  
43946, 13540, 1189.6419, 2.972960  
43947, 13882, 1189.5800, 2.972805  
43948, 13912, 1189.5180, 2.972651  
43949, 13908, 1189.4561, 2.972496  
43950, 13892, 1189.3942, 2.972341  
43951, 13654, 1189.3323, 2.972186  
43952, 13110, 1189.2703, 2.972032  
43953, 12490, 1189.2084, 2.971877  
43954, 12102, 1189.1465, 2.971722  
43955, 11984, 1189.0845, 2.971567  
43956, 11866, 1189.0226, 2.971413  
43957, 11536, 1188.9607, 2.971258  
43958, 11146, 1188.8988, 2.971103  
43959, 11040, 1188.8368, 2.970948  
43960, 11296, 1188.7749, 2.970794  
43961, 11574, 1188.7130, 2.970639  
43962, 11442, 1188.6511, 2.970484

43963, 10914, 1188.5891, 2.970329  
43964, 10456, 1188.5272, 2.970174  
43965, 10480, 1188.4653, 2.970020  
43966, 10824, 1188.4033, 2.969865  
43967, 10910, 1188.3414, 2.969710  
43968, 10384, 1188.2795, 2.969555  
43969, 9600, 1188.2176, 2.969401  
43970, 9312, 1188.1556, 2.969246  
43971, 9896, 1188.0937, 2.969091  
43972, 10950, 1188.0318, 2.968936  
43973, 11704, 1187.9699, 2.968782  
43974, 11784, 1187.9079, 2.968627  
43975, 11514, 1187.8460, 2.968472  
43976, 11478, 1187.7841, 2.968317  
43977, 11870, 1187.7222, 2.968163  
43978, 12336, 1187.6602, 2.968008  
43979, 12470, 1187.5983, 2.967853  
43980, 12310, 1187.5364, 2.967698  
43981, 12298, 1187.4744, 2.967544  
43982, 12736, 1187.4125, 2.967389  
43983, 13440, 1187.3506, 2.967234  
43984, 13948, 1187.2887, 2.967079  
43985, 14002, 1187.2267, 2.966925  
43986, 13778, 1187.1648, 2.966770  
43987, 13608, 1187.1029, 2.966615  
43988, 13600, 1187.0410, 2.966460  
43989, 13626, 1186.9790, 2.966306  
43990, 13608, 1186.9171, 2.966151  
43991, 13716, 1186.8552, 2.965996  
43992, 14100, 1186.7932, 2.965841  
43993, 14562, 1186.7313, 2.965687  
43994, 14596, 1186.6694, 2.965532  
43995, 13856, 1186.6075, 2.965377  
43996, 12578, 1186.5455, 2.965222  
43997, 11424, 1186.4836, 2.965067  
43998, 10912, 1186.4217, 2.964913  
43999, 10968, 1186.3598, 2.964758  
44000, 11090, 1186.2978, 2.964603  
44001, 10926, 1186.2359, 2.964448  
44002, 10588, 1186.1740, 2.964294  
44003, 10448, 1186.1121, 2.964139  
44004, 10666, 1186.0501, 2.963984  
44005, 11052, 1185.9882, 2.963829  
44006, 11334, 1185.9263, 2.963675  
44007, 11496, 1185.8643, 2.963520  
44008, 11752, 1185.8024, 2.963365  
44009, 12212, 1185.7405, 2.963210  
44010, 12730, 1185.6786, 2.963056  
44011, 13078, 1185.6166, 2.962901  
44012, 13254, 1185.5547, 2.962746  
44013, 13458, 1185.4928, 2.962591  
44014, 13796, 1185.4309, 2.962437  
44015, 14046, 1185.3689, 2.962282  
44016, 13870, 1185.3070, 2.962127  
44017, 13222, 1185.2451, 2.961972  
44018, 12482, 1185.1831, 2.961818  
44019, 12074, 1185.1212, 2.961663  
44020, 12010, 1185.0593, 2.961508  
44021, 11904, 1184.9974, 2.961353  
44022, 11472, 1184.9354, 2.961199  
44023, 10928, 1184.8735, 2.961044  
44024, 10816, 1184.8116, 2.960889  
44025, 11404, 1184.7497, 2.960734  
44026, 12308, 1184.6877, 2.960580  
44027, 12856, 1184.6258, 2.960425  
44028, 12756, 1184.5639, 2.960270  
44029, 12432, 1184.5020, 2.960115  
44030, 12570, 1184.4400, 2.959960  
44031, 13438, 1184.3781, 2.959806  
44032, 14644, 1184.3162, 2.959651  
44033, 15560, 1184.2542, 2.959496  
44034, 15908, 1184.1923, 2.959341  
44035, 15866, 1184.1304, 2.959187  
44036, 15712, 1184.0685, 2.959032  
44037, 15442, 1184.0065, 2.958877  
44038, 14868, 1183.9446, 2.958722

44039, 13956, 1183.8827, 2.958568  
44040, 12982, 1183.8208, 2.958413  
44041, 12266, 1183.7588, 2.958258  
44042, 11866, 1183.6969, 2.958103  
44043, 11586, 1183.6350, 2.957949  
44044, 11298, 1183.5730, 2.957794  
44045, 11170, 1183.5111, 2.957639  
44046, 11462, 1183.4492, 2.957484  
44047, 12144, 1183.3873, 2.957330  
44048, 12830, 1183.3253, 2.957175  
44049, 13128, 1183.2634, 2.957020  
44050, 13056, 1183.2015, 2.956865  
44051, 13002, 1183.1396, 2.956711  
44052, 13272, 1183.0776, 2.956556  
44053, 13734, 1183.0157, 2.956401  
44054, 13962, 1182.9538, 2.956246  
44055, 13724, 1182.8919, 2.956092  
44056, 13230, 1182.8299, 2.955937  
44057, 12920, 1182.7680, 2.955782  
44058, 13004, 1182.7061, 2.955627  
44059, 13312, 1182.6441, 2.955473  
44060, 13556, 1182.5822, 2.955318  
44061, 13624, 1182.5203, 2.955163  
44062, 13600, 1182.4584, 2.955008  
44063, 13500, 1182.3964, 2.954853  
44064, 13216, 1182.3345, 2.954699  
44065, 12702, 1182.2726, 2.954544  
44066, 12206, 1182.2107, 2.954389  
44067, 12124, 1182.1487, 2.954234  
44068, 12568, 1182.0868, 2.954080  
44069, 13116, 1182.0249, 2.953925  
44070, 13170, 1181.9629, 2.953770  
44071, 12576, 1181.9010, 2.953615  
44072, 11806, 1181.8391, 2.953461  
44073, 11502, 1181.7772, 2.953306  
44074, 11820, 1181.7152, 2.953151  
44075, 12280, 1181.6533, 2.952996  
44076, 12298, 1181.5914, 2.952842  
44077, 11796, 1181.5295, 2.952687  
44078, 11186, 1181.4675, 2.952532  
44079, 10828, 1181.4056, 2.952377  
44080, 10608, 1181.3437, 2.952223  
44081, 10114, 1181.2818, 2.952068  
44082, 9264, 1181.2198, 2.951913  
44083, 8502, 1181.1579, 2.951758  
44084, 8394, 1181.0960, 2.951604  
44085, 8960, 1181.0340, 2.951449  
44086, 9584, 1180.9721, 2.951294  
44087, 9632, 1180.9102, 2.951139  
44088, 9088, 1180.8483, 2.950985  
44089, 8542, 1180.7863, 2.950830  
44090, 8522, 1180.7244, 2.950675  
44091, 8990, 1180.6625, 2.950520  
44092, 9472, 1180.6006, 2.950366  
44093, 9680, 1180.5386, 2.950211  
44094, 9804, 1180.4767, 2.950056  
44095, 10194, 1180.4148, 2.949901  
44096, 10856, 1180.3528, 2.949746  
44097, 11378, 1180.2909, 2.949592  
44098, 11446, 1180.2290, 2.949437  
44099, 11252, 1180.1671, 2.949282  
44100, 11354, 1180.1051, 2.949127  
44101, 12020, 1180.0432, 2.948973  
44102, 12904, 1179.9813, 2.948818  
44103, 13386, 1179.9194, 2.948663  
44104, 13234, 1179.8574, 2.948508  
44105, 12858, 1179.7955, 2.948354  
44106, 12804, 1179.7336, 2.948199  
44107, 13156, 1179.6717, 2.948044  
44108, 13456, 1179.6097, 2.947889  
44109, 13280, 1179.5478, 2.947735  
44110, 12744, 1179.4859, 2.947580  
44111, 12434, 1179.4239, 2.947425  
44112, 12734, 1179.3620, 2.947270  
44113, 13480, 1179.3001, 2.947116  
44114, 14132, 1179.2382, 2.946961

44115, 14362, 1179.1762, 2.946806  
44116, 14294, 1179.1143, 2.946651  
44117, 14204, 1179.0524, 2.946497  
44118, 14128, 1178.9905, 2.946342  
44119, 13830, 1178.9285, 2.946187  
44120, 13216, 1178.8666, 2.946032  
44121, 12558, 1178.8047, 2.945878  
44122, 12288, 1178.7428, 2.945723  
44123, 12484, 1178.6808, 2.945568  
44124, 12770, 1178.6189, 2.945413  
44125, 12690, 1178.5570, 2.945258  
44126, 12206, 1178.4950, 2.945104  
44127, 11722, 1178.4331, 2.944949  
44128, 11614, 1178.3712, 2.944794  
44129, 11822, 1178.3093, 2.944639  
44130, 11946, 1178.2473, 2.944485  
44131, 11738, 1178.1854, 2.944330  
44132, 11374, 1178.1235, 2.944175  
44133, 11230, 1178.0616, 2.944020  
44134, 11414, 1177.9996, 2.943866  
44135, 11650, 1177.9377, 2.943711  
44136, 11668, 1177.8758, 2.943556  
44137, 11542, 1177.8138, 2.943401  
44138, 11656, 1177.7519, 2.943247  
44139, 12206, 1177.6900, 2.943092  
44140, 12896, 1177.6281, 2.942937  
44141, 13214, 1177.5661, 2.942782  
44142, 12920, 1177.5042, 2.942628  
44143, 12324, 1177.4423, 2.942473  
44144, 11896, 1177.3804, 2.942318  
44145, 11780, 1177.3184, 2.942163  
44146, 11660, 1177.2565, 2.942009  
44147, 11164, 1177.1946, 2.941854  
44148, 10326, 1177.1327, 2.941699  
44149, 9594, 1177.0707, 2.941544  
44150, 9390, 1177.0088, 2.941390  
44151, 9754, 1176.9469, 2.941235  
44152, 10380, 1176.8849, 2.941080  
44153, 10984, 1176.8230, 2.940925  
44154, 11540, 1176.7611, 2.940771  
44155, 12180, 1176.6992, 2.940616  
44156, 12916, 1176.6372, 2.940461  
44157, 13586, 1176.5753, 2.940306  
44158, 14002, 1176.5134, 2.940151  
44159, 14150, 1176.4515, 2.939997  
44160, 14164, 1176.3895, 2.939842  
44161, 14144, 1176.3276, 2.939687  
44162, 14066, 1176.2657, 2.939532  
44163, 13866, 1176.2037, 2.939378  
44164, 13548, 1176.1418, 2.939223  
44165, 13164, 1176.0799, 2.939068  
44166, 12718, 1176.0180, 2.938913  
44167, 12148, 1175.9560, 2.938759  
44168, 11460, 1175.8941, 2.938604  
44169, 10836, 1175.8322, 2.938449  
44170, 10508, 1175.7703, 2.938294  
44171, 10508, 1175.7083, 2.938140  
44172, 10626, 1175.6464, 2.937985  
44173, 10622, 1175.5845, 2.937830  
44174, 10502, 1175.5226, 2.937675  
44175, 10520, 1175.4606, 2.937521  
44176, 10860, 1175.3987, 2.937366  
44177, 11366, 1175.3368, 2.937211  
44178, 11670, 1175.2748, 2.937056  
44179, 11588, 1175.2129, 2.936902  
44180, 11294, 1175.1510, 2.936747  
44181, 11116, 1175.0891, 2.936592  
44182, 11098, 1175.0271, 2.936437  
44183, 10938, 1174.9652, 2.936283  
44184, 10356, 1174.9033, 2.936128  
44185, 9518, 1174.8414, 2.935973  
44186, 8994, 1174.7794, 2.935818  
44187, 9176, 1174.7175, 2.935664  
44188, 9844, 1174.6556, 2.935509  
44189, 10360, 1174.5936, 2.935354  
44190, 10276, 1174.5317, 2.935199

44191, 9774, 1174.4698, 2.935044  
44192, 9428, 1174.4079, 2.934890  
44193, 9604, 1174.3459, 2.934735  
44194, 10114, 1174.2840, 2.934580  
44195, 10538, 1174.2221, 2.934425  
44196, 10714, 1174.1602, 2.934271  
44197, 10880, 1174.0982, 2.934116  
44198, 11296, 1174.0363, 2.933961  
44199, 11878, 1173.9744, 2.933806  
44200, 12266, 1173.9125, 2.933652  
44201, 12294, 1173.8505, 2.933497  
44202, 12218, 1173.7886, 2.933342  
44203, 12476, 1173.7267, 2.933187  
44204, 13156, 1173.6647, 2.933033  
44205, 13870, 1173.6028, 2.932878  
44206, 14122, 1173.5409, 2.932723  
44207, 13812, 1173.4790, 2.932568  
44208, 13286, 1173.4170, 2.932414  
44209, 12892, 1173.3551, 2.932259  
44210, 12616, 1173.2932, 2.932104  
44211, 12190, 1173.2313, 2.931949  
44212, 11512, 1173.1693, 2.931795  
44213, 10850, 1173.1074, 2.931640  
44214, 10606, 1173.0455, 2.931485  
44215, 10882, 1172.9835, 2.931330  
44216, 11420, 1172.9216, 2.931176  
44217, 11926, 1172.8597, 2.931021  
44218, 12432, 1172.7978, 2.930866  
44219, 13130, 1172.7358, 2.930711  
44220, 14008, 1172.6739, 2.930557  
44221, 14684, 1172.6120, 2.930402  
44222, 14692, 1172.5501, 2.930247  
44223, 13990, 1172.4881, 2.930092  
44224, 13008, 1172.4262, 2.929937  
44225, 12240, 1172.3643, 2.929783  
44226, 11798, 1172.3024, 2.929628  
44227, 11414, 1172.2404, 2.929473  
44228, 10896, 1172.1785, 2.929318  
44229, 10394, 1172.1166, 2.929164  
44230, 10238, 1172.0546, 2.929009  
44231, 10482, 1171.9927, 2.928854  
44232, 10796, 1171.9308, 2.928699  
44233, 10850, 1171.8689, 2.928545  
44234, 10698, 1171.8069, 2.928390  
44235, 10740, 1171.7450, 2.928235  
44236, 11220, 1171.6831, 2.928080  
44237, 11866, 1171.6212, 2.927926  
44238, 12122, 1171.5592, 2.927771  
44239, 11750, 1171.4973, 2.927616  
44240, 11092, 1171.4354, 2.927461  
44241, 10720, 1171.3734, 2.927307  
44242, 10852, 1171.3115, 2.927152  
44243, 11190, 1171.2496, 2.926997  
44244, 11366, 1171.1877, 2.926842  
44245, 11434, 1171.1257, 2.926688  
44246, 11802, 1171.0638, 2.926533  
44247, 12676, 1171.0019, 2.926378  
44248, 13688, 1170.9400, 2.926223  
44249, 14176, 1170.8780, 2.926069  
44250, 13860, 1170.8161, 2.925914  
44251, 13170, 1170.7542, 2.925759  
44252, 12836, 1170.6923, 2.925604  
44253, 13162, 1170.6303, 2.925450  
44254, 13754, 1170.5684, 2.925295  
44255, 13962, 1170.5065, 2.925140  
44256, 13548, 1170.4445, 2.924985  
44257, 12860, 1170.3826, 2.924830  
44258, 12386, 1170.3207, 2.924676  
44259, 12264, 1170.2588, 2.924521  
44260, 12194, 1170.1968, 2.924366  
44261, 11858, 1170.1349, 2.924211  
44262, 11246, 1170.0730, 2.924057  
44263, 10624, 1170.0111, 2.923902  
44264, 10204, 1169.9491, 2.923747  
44265, 9962, 1169.8872, 2.923592  
44266, 9756, 1169.8253, 2.923438  
44267, 9516, 1169.7633, 2.923283  
44268, 9284, 1169.7014, 2.923128  
44269, 9042, 1169.6395, 2.922973  
44270, 8712, 1169.5776, 2.922819  
44271, 8290, 1169.5156, 2.922664  
44272, 7966, 1169.4537, 2.922509  
44273, 8000, 1169.3918, 2.922354  
44274, 8424, 1169.3299, 2.922200  
44275, 8972, 1169.2679, 2.922045  
44276, 9358, 1169.2060, 2.921890  
44277, 9622, 1169.1441, 2.921735  
44278, 10134, 1169.0822, 2.921581  
44279, 11156, 1169.0202, 2.921426  
44280, 12432, 1168.9583, 2.921271  
44281, 13284, 1168.8964, 2.921116  
44282, 13226, 1168.8344, 2.920962  
44283, 12426, 1168.7725, 2.920807  
44284, 11598, 1168.7106, 2.920652  
44285, 11356, 1168.6487, 2.920497  
44286, 11740, 1168.5867, 2.920343  
44287, 12288, 1168.5248, 2.920188  
44288, 12528, 1168.4629, 2.920033  
44289, 12388, 1168.4010, 2.919878  
44290, 12112, 1168.3390, 2.919723  
44291, 11958, 1168.2771, 2.919569  
44292, 12040, 1168.2152, 2.919414  
44293, 12348, 1168.1532, 2.919259  
44294, 12884, 1168.0913, 2.919104  
44295, 13552, 1168.0294, 2.918950  
44296, 14108, 1167.9675, 2.918795  
44297, 14236, 1167.9055, 2.918640  
44298, 13878, 1167.8436, 2.918485  
44299, 13384, 1167.7817, 2.918331  
44300, 13272, 1167.7198, 2.918176  
44301, 13734, 1167.6578, 2.918021  
44302, 14432, 1167.5959, 2.917866  
44303, 14776, 1167.5340, 2.917712  
44304, 14466, 1167.4721, 2.917557  
44305, 13710, 1167.4101, 2.917402  
44306, 12936, 1167.3482, 2.917247  
44307, 12360, 1167.2863, 2.917093  
44308, 11906, 1167.2243, 2.916938  
44309, 11464, 1167.1624, 2.916783  
44310, 11182, 1167.1005, 2.916628  
44311, 11340, 1167.0386, 2.916474  
44312, 11986, 1166.9766, 2.916319  
44313, 12762, 1166.9147, 2.916164  
44314, 13200, 1166.8528, 2.916009  
44315, 13092, 1166.7909, 2.915855  
44316, 12622, 1166.7289, 2.915700  
44317, 12038, 1166.6670, 2.915545  
44318, 11378, 1166.6051, 2.915390  
44319, 10488, 1166.5431, 2.915236  
44320, 9380, 1166.4812, 2.915081  
44321, 8336, 1166.4193, 2.914926  
44322, 7696, 1166.3574, 2.914771  
44323, 7494, 1166.2954, 2.914616  
44324, 7442, 1166.2335, 2.914462  
44325, 7334, 1166.1716, 2.914307  
44326, 7346, 1166.1097, 2.914152  
44327, 7900, 1166.0477, 2.913997  
44328, 9138, 1165.9858, 2.913843  
44329, 10664, 1165.9239, 2.913688  
44330, 11846, 1165.8620, 2.913533  
44331, 12386, 1165.8000, 2.913378  
44332, 12532, 1165.7381, 2.913224  
44333, 12748, 1165.6762, 2.913069  
44334, 13152, 1165.6142, 2.912914  
44335, 13478, 1165.5523, 2.912759  
44336, 13466, 1165.4904, 2.912605  
44337, 13266, 1165.4285, 2.912450  
44338, 13292, 1165.3665, 2.912295  
44339, 13724, 1165.3046, 2.912140  
44340, 14274, 1165.2427, 2.911986  
44341, 14484, 1165.1808, 2.911831  
44342, 14244, 1165.1188, 2.911676  
44343, 13898, 1165.0569, 2.911521  
44344, 13798, 1164.9950, 2.911367  
44345, 13866, 1164.9331, 2.911212  
44346, 13674, 1164.8711, 2.911057  
44347, 13002, 1164.8092, 2.910902  
44348, 12180, 1164.7473, 2.910748  
44349, 11806, 1164.6853, 2.910593  
44350, 12090, 1164.6234, 2.910438  
44351, 12610, 1164.5615, 2.910283  
44352, 12746, 1164.4996, 2.910129  
44353, 12336, 1164.4376, 2.909974  
44354, 11848, 1164.3757, 2.909819  
44355, 11836, 1164.3138, 2.909664  
44356, 12346, 1164.2519, 2.909509  
44357, 12888, 1164.1899, 2.909355  
44358, 13000, 1164.1280, 2.909200  
44359, 12736, 1164.0661, 2.909045  
44360, 12558, 1164.0041, 2.908890  
44361, 12766, 1163.9422, 2.908736  
44362, 13178, 1163.8803, 2.908581  
44363, 13358, 1163.8184, 2.908426  
44364, 13108, 1163.7564, 2.908271  
44365, 12660, 1163.6945, 2.908117  
44366, 12350, 1163.6326, 2.907962  
44367, 12220, 1163.5707, 2.907807  
44368, 12022, 1163.5087, 2.907652  
44369, 11590, 1163.4468, 2.907498  
44370, 11056, 1163.3849, 2.907343  
44371, 10706, 1163.3230, 2.907188  
44372, 10638, 1163.2610, 2.907033  
44373, 10674, 1163.1991, 2.906879  
44374, 10624, 1163.1372, 2.906724  
44375, 10558, 1163.0752, 2.906569  
44376, 10724, 1163.0133, 2.906414  
44377, 11188, 1162.9514, 2.906260  
44378, 11696, 1162.8895, 2.906105  
44379, 11968, 1162.8275, 2.905950  
44380, 12036, 1162.7656, 2.905795  
44381, 12296, 1162.7037, 2.905641  
44382, 13020, 1162.6418, 2.905486  
44383, 13990, 1162.5798, 2.905331  
44384, 14662, 1162.5179, 2.905176  
44385, 14700, 1162.4560, 2.905022  
44386, 14360, 1162.3940, 2.904867  
44387, 14208, 1162.3321, 2.904712  
44388, 14512, 1162.2702, 2.904557  
44389, 14948, 1162.2083, 2.904402  
44390, 14974, 1162.1463, 2.904248  
44391, 14420, 1162.0844, 2.904093  
44392, 13692, 1162.0225, 2.903938  
44393, 13332, 1161.9606, 2.903783  
44394, 13502, 1161.8986, 2.903629  
44395, 13828, 1161.8367, 2.903474  
44396, 13854, 1161.7748, 2.903319  
44397, 13454, 1161.7129, 2.903164  
44398, 12918, 1161.6509, 2.903010  
44399, 12594, 1161.5890, 2.902855  
44400, 12630, 1161.5271, 2.902700  
44401, 12984, 1161.4651, 2.902545  
44402, 13540, 1161.4032, 2.902391  
44403, 14128, 1161.3413, 2.902236  
44404, 14460, 1161.2794, 2.902081  
44405, 14212, 1161.2174, 2.901926  
44406, 13316, 1161.1555, 2.901772  
44407, 12178, 1161.0936, 2.901617  
44408, 11420, 1161.0317, 2.901462  
44409, 11350, 1160.9697, 2.901307  
44410, 11604, 1160.9078, 2.901153  
44411, 11462, 1160.8459, 2.900998  
44412, 10560, 1160.7839, 2.900843  
44413, 9292, 1160.7220, 2.900688  
44414, 8456, 1160.6601, 2.900534  
44415, 8502, 1160.5982, 2.900379  
44416, 9160, 1160.5362, 2.900224  
44417, 9788, 1160.4743, 2.900069  
44418, 10016, 1160.4124, 2.899914



44419, 10026, 1160.3505, 2.899760  
44420, 10212, 1160.2885, 2.899605  
44421, 10656, 1160.2266, 2.899450  
44422, 11042, 1160.1647, 2.899295  
44423, 11056, 1160.1028, 2.899141  
44424, 10762, 1160.0408, 2.898986  
44425, 10514, 1159.9789, 2.898831  
44426, 10566, 1159.9170, 2.898676  
44427, 10826, 1159.8550, 2.898522  
44428, 11030, 1159.7931, 2.898367  
44429, 11102, 1159.7312, 2.898212  
44430, 11204, 1159.6693, 2.898057  
44431, 11506, 1159.6073, 2.897903  
44432, 11936, 1159.5454, 2.897748  
44433, 12260, 1159.4835, 2.897593  
44434, 12366, 1159.4216, 2.897438  
44435, 12366, 1159.3596, 2.897284  
44436, 12416, 1159.2977, 2.897129  
44437, 12482, 1159.2358, 2.896974  
44438, 12424, 1159.1738, 2.896819  
44439, 12244, 1159.1119, 2.896665  
44440, 12236, 1159.0500, 2.896510  
44441, 12658, 1158.9881, 2.896355  
44442, 13376, 1158.9261, 2.896200  
44443, 13820, 1158.8642, 2.896046  
44444, 13486, 1158.8023, 2.895891  
44445, 12434, 1158.7404, 2.895736  
44446, 11268, 1158.6784, 2.895581  
44447, 10580, 1158.6165, 2.895427  
44448, 10418, 1158.5546, 2.895272  
44449, 10402, 1158.4927, 2.895117  
44450, 10266, 1158.4307, 2.894962  
44451, 10208, 1158.3688, 2.894807  
44452, 10636, 1158.3069, 2.894653  
44453, 11638, 1158.2449, 2.894498  
44454, 12744, 1158.1830, 2.894343  
44455, 13318, 1158.1211, 2.894188  
44456, 13104, 1158.0592, 2.894034  
44457, 12398, 1157.9972, 2.893879  
44458, 11660, 1157.9353, 2.893724  
44459, 11084, 1157.8734, 2.893569  
44460, 10574, 1157.8115, 2.893415  
44461, 10090, 1157.7495, 2.893260  
44462, 9806, 1157.6876, 2.893105  
44463, 9900, 1157.6257, 2.892950  
44464, 10222, 1157.5637, 2.892796  
44465, 10322, 1157.5018, 2.892641  
44466, 9924, 1157.4399, 2.892486  
44467, 9294, 1157.3780, 2.892331  
44468, 9086, 1157.3160, 2.892177  
44469, 9720, 1157.2541, 2.892022  
44470, 10958, 1157.1922, 2.891867  
44471, 12080, 1157.1303, 2.891712  
44472, 12536, 1157.0683, 2.891558  
44473, 12322, 1157.0064, 2.891403  
44474, 11848, 1156.9445, 2.891248  
44475, 11486, 1156.8826, 2.891093  
44476, 11312, 1156.8206, 2.890939  
44477, 11288, 1156.7587, 2.890784  
44478, 11464, 1156.6968, 2.890629  
44479, 11946, 1156.6348, 2.890474  
44480, 12696, 1156.5729, 2.890320  
44481, 13430, 1156.5110, 2.890165  
44482, 13874, 1156.4491, 2.890010  
44483, 14004, 1156.3871, 2.889855  
44484, 14076, 1156.3252, 2.889700  
44485, 14282, 1156.2633, 2.889546  
44486, 14506, 1156.2014, 2.889391  
44487, 14458, 1156.1394, 2.889236  
44488, 14034, 1156.0775, 2.889081  
44489, 13460, 1156.0156, 2.888927  
44490, 13034, 1155.9536, 2.888772  
44491, 12784, 1155.8917, 2.888617  
44492, 12466, 1155.8298, 2.888462  
44493, 11896, 1155.7679, 2.888308  
44494, 11236, 1155.7059, 2.888153

44495, 10846, 1155.6440, 2.887998  
44496, 10858, 1155.5821, 2.887843  
44497, 11034, 1155.5202, 2.887689  
44498, 11028, 1155.4582, 2.887534  
44499, 10848, 1155.3963, 2.887379  
44500, 10856, 1155.3344, 2.887224  
44501, 11336, 1155.2725, 2.887070  
44502, 12082, 1155.2105, 2.886915  
44503, 12534, 1155.1486, 2.886760  
44504, 12354, 1155.0867, 2.886605  
44505, 11840, 1155.0247, 2.886451  
44506, 11630, 1154.9628, 2.886296  
44507, 12062, 1154.9009, 2.886141  
44508, 12838, 1154.8390, 2.885986  
44509, 13326, 1154.7770, 2.885832  
44510, 13230, 1154.7151, 2.885677  
44511, 12800, 1154.6532, 2.885522  
44512, 12512, 1154.5913, 2.885367  
44513, 12530, 1154.5293, 2.885213  
44514, 12628, 1154.4674, 2.885058  
44515, 12562, 1154.4055, 2.884903  
44516, 12422, 1154.3435, 2.884748  
44517, 12512, 1154.2816, 2.884593  
44518, 12928, 1154.2197, 2.884439  
44519, 13342, 1154.1578, 2.884284  
44520, 13302, 1154.0958, 2.884129  
44521, 12706, 1154.0339, 2.883974  
44522, 11952, 1153.9720, 2.883820  
44523, 11582, 1153.9101, 2.883665  
44524, 11838, 1153.8481, 2.883510  
44525, 12518, 1153.7862, 2.883355  
44526, 13256, 1153.7243, 2.883201  
44527, 13798, 1153.6624, 2.883046  
44528, 14042, 1153.6004, 2.882891  
44529, 13934, 1153.5385, 2.882736  
44530, 13448, 1153.4766, 2.882582  
44531, 12728, 1153.4146, 2.882427  
44532, 12098, 1153.3527, 2.882272  
44533, 11868, 1153.2908, 2.882117  
44534, 12018, 1153.2289, 2.881963  
44535, 12244, 1153.1669, 2.881808  
44536, 12288, 1153.1050, 2.881653  
44537, 12264, 1153.0431, 2.881498  
44538, 12552, 1152.9812, 2.881344  
44539, 13312, 1152.9192, 2.881189  
44540, 14230, 1152.8573, 2.881034  
44541, 14762, 1152.7954, 2.880879  
44542, 14660, 1152.7335, 2.880725  
44543, 14240, 1152.6715, 2.880570  
44544, 14006, 1152.6096, 2.880415  
44545, 14098, 1152.5477, 2.880260  
44546, 14162, 1152.4857, 2.880106  
44547, 13792, 1152.4238, 2.879951  
44548, 13028, 1152.3619, 2.879796  
44549, 12334, 1152.3000, 2.879641  
44550, 12082, 1152.2380, 2.879486  
44551, 12136, 1152.1761, 2.879332  
44552, 12030, 1152.1142, 2.879177  
44553, 11508, 1152.0523, 2.879022  
44554, 10834, 1151.9903, 2.878867  
44555, 10514, 1151.9284, 2.878713  
44556, 10732, 1151.8665, 2.878558  
44557, 11220, 1151.8045, 2.878403  
44558, 11598, 1151.7426, 2.878248  
44559, 11844, 1151.6807, 2.878094  
44560, 12222, 1151.6188, 2.877939  
44561, 12838, 1151.5568, 2.877784  
44562, 13336, 1151.4949, 2.877629  
44563, 13168, 1151.4330, 2.877475  
44564, 12194, 1151.3711, 2.877320  
44565, 10938, 1151.3091, 2.877165  
44566, 10184, 1151.2472, 2.877010  
44567, 10318, 1151.1853, 2.876856  
44568, 11070, 1151.1234, 2.876701  
44569, 11890, 1151.0614, 2.876546  
44570, 12480, 1150.9995, 2.876391

44571, 12942, 1150.9376, 2.876237  
44572, 13470, 1150.8756, 2.876082  
44573, 14006, 1150.8137, 2.875927  
44574, 14280, 1150.7518, 2.875772  
44575, 14170, 1150.6899, 2.875618  
44576, 13854, 1150.6279, 2.875463  
44577, 13638, 1150.5660, 2.875308  
44578, 13634, 1150.5041, 2.875153  
44579, 13684, 1150.4422, 2.874999  
44580, 13604, 1150.3802, 2.874844  
44581, 13414, 1150.3183, 2.874689  
44582, 13312, 1150.2564, 2.874534  
44583, 13376, 1150.1944, 2.874379  
44584, 13436, 1150.1325, 2.874225  
44585, 13252, 1150.0706, 2.874070  
44586, 12826, 1150.0086, 2.873915  
44587, 12408, 1149.9467, 2.873760  
44588, 12294, 1149.8848, 2.873606  
44589, 12540, 1149.8229, 2.873451  
44590, 12990, 1149.7610, 2.873296  
44591, 13422, 1149.6990, 2.873141  
44592, 13724, 1149.6371, 2.872987  
44593, 13854, 1149.5752, 2.872832  
44594, 13764, 1149.5133, 2.872677  
44595, 13428, 1149.4513, 2.872522  
44596, 12984, 1149.3894, 2.872368  
44597, 12698, 1149.3275, 2.872213  
44598, 12740, 1149.2655, 2.872058  
44599, 12970, 1149.2036, 2.871903  
44600, 13042, 1149.1417, 2.871749  
44601, 12774, 1149.0798, 2.871594  
44602, 12388, 1149.0178, 2.871439  
44603, 12304, 1148.9559, 2.871284  
44604, 12666, 1148.8940, 2.871130  
44605, 13146, 1148.8321, 2.870975  
44606, 13218, 1148.7701, 2.870820  
44607, 12688, 1148.7082, 2.870665  
44608, 11870, 1148.6463, 2.870511  
44609, 11256, 1148.5843, 2.870356  
44610, 11050, 1148.5224, 2.870201  
44611, 11038, 1148.4605, 2.870046  
44612, 10964, 1148.3986, 2.869892  
44613, 10852, 1148.3366, 2.869737  
44614, 10956, 1148.2747, 2.869582  
44615, 11388, 1148.2128, 2.869427  
44616, 11916, 1148.1509, 2.869272  
44617, 12170, 1148.0889, 2.869118  
44618, 12050, 1148.0270, 2.868963  
44619, 11768, 1147.9651, 2.868808  
44620, 11554, 1147.9032, 2.868653  
44621, 11314, 1147.8412, 2.868499  
44622, 10748, 1147.7793, 2.868344  
44623, 9798, 1147.7174, 2.868189  
44624, 8830, 1147.6554, 2.868034  
44625, 8360, 1147.5935, 2.867880  
44626, 8498, 1147.5316, 2.867725  
44627, 8810, 1147.4697, 2.867570  
44628, 8772, 1147.4077, 2.867415  
44629, 8322, 1147.3458, 2.867261  
44630, 7934, 1147.2839, 2.867106  
44631, 8098, 1147.2220, 2.866951  
44632, 8816, 1147.1600, 2.866796  
44633, 9624, 1147.0981, 2.866642  
44634, 10138, 1147.0362, 2.866487  
44635, 10426, 1146.9742, 2.866332  
44636, 10862, 1146.9123, 2.866177  
44637, 11618, 1146.8504, 2.866023  
44638, 12432, 1146.7885, 2.865868  
44639, 12906, 1146.7265, 2.865713  
44640, 12968, 1146.6646, 2.865558  
44641, 12956, 1146.6027, 2.865404  
44642, 13204, 1146.5408, 2.865249  
44643, 13654, 1146.4788, 2.865094  
44644, 13884, 1146.4169, 2.864939  
44645, 13594, 1146.3550, 2.864785  
44646, 12894, 1146.2931, 2.864630

44647, 12192, 1146.2311, 2.864475  
44648, 11762, 1146.1692, 2.864320  
44649, 11558, 1146.1073, 2.864165  
44650, 11380, 1146.0453, 2.864011  
44651, 11186, 1145.9834, 2.863856  
44652, 11128, 1145.9215, 2.863701  
44653, 11336, 1145.8596, 2.863546  
44654, 11708, 1145.7976, 2.863392  
44655, 12024, 1145.7357, 2.863237  
44656, 12174, 1145.6738, 2.863082  
44657, 12254, 1145.6119, 2.862927  
44658, 12370, 1145.5499, 2.862773  
44659, 12440, 1145.4880, 2.862618  
44660, 12314, 1145.4261, 2.862463  
44661, 11986, 1145.3641, 2.862308  
44662, 11698, 1145.3022, 2.862154  
44663, 11686, 1145.2403, 2.861999  
44664, 11906, 1145.1784, 2.861844  
44665, 12040, 1145.1164, 2.861689  
44666, 11866, 1145.0545, 2.861535  
44667, 11564, 1144.9926, 2.861380  
44668, 11524, 1144.9307, 2.861225  
44669, 11982, 1144.8687, 2.861070  
44670, 12716, 1144.8068, 2.860916  
44671, 13290, 1144.7449, 2.860761  
44672, 13472, 1144.6830, 2.860606  
44673, 13362, 1144.6210, 2.860451  
44674, 13168, 1144.5591, 2.860297  
44675, 12890, 1144.4972, 2.860142  
44676, 12392, 1144.4352, 2.859987  
44677, 11710, 1144.3733, 2.859832  
44678, 11224, 1144.3114, 2.859678  
44679, 11332, 1144.2495, 2.859523  
44680, 12014, 1144.1875, 2.859368  
44681, 12766, 1144.1256, 2.859213  
44682, 13090, 1144.0637, 2.859058  
44683, 12972, 1144.0018, 2.858904  
44684, 12870, 1143.9398, 2.858749  
44685, 13154, 1143.8779, 2.858594  
44686, 13698, 1143.8160, 2.858439  
44687, 14026, 1143.7540, 2.858285  
44688, 13892, 1143.6921, 2.858130  
44689, 13552, 1143.6302, 2.857975  
44690, 13462, 1143.5683, 2.857820  
44691, 13710, 1143.5063, 2.857666  
44692, 13902, 1143.4444, 2.857511  
44693, 13654, 1143.3825, 2.857356  
44694, 13108, 1143.3206, 2.857201  
44695, 12840, 1143.2586, 2.857047  
44696, 13208, 1143.1967, 2.856892  
44697, 13904, 1143.1348, 2.856737  
44698, 14198, 1143.0729, 2.856582  
44699, 13664, 1143.0109, 2.856428  
44700, 12590, 1142.9490, 2.856273  
44701, 11640, 1142.8871, 2.856118  
44702, 11194, 1142.8251, 2.855963  
44703, 11094, 1142.7632, 2.855809  
44704, 10984, 1142.7013, 2.855654  
44705, 10874, 1142.6394, 2.855499  
44706, 11092, 1142.5774, 2.855344  
44707, 11820, 1142.5155, 2.855190  
44708, 12722, 1142.4536, 2.855035  
44709, 13174, 1142.3917, 2.854880  
44710, 12872, 1142.3297, 2.854725  
44711, 12106, 1142.2678, 2.854570  
44712, 11418, 1142.2059, 2.854416  
44713, 11040, 1142.1439, 2.854261  
44714, 10770, 1142.0820, 2.854106  
44715, 10372, 1142.0201, 2.853951  
44716, 9984, 1141.9582, 2.853797  
44717, 10010, 1141.8962, 2.853642  
44718, 10626, 1141.8343, 2.853487  
44719, 11504, 1141.7724, 2.853332  
44720, 12128, 1141.7105, 2.853178  
44721, 12322, 1141.6485, 2.853023  
44722, 12398, 1141.5866, 2.852868  
44723, 12740, 1141.5247, 2.852713  
44724, 13322, 1141.4628, 2.852559  
44725, 13722, 1141.4008, 2.852404  
44726, 13606, 1141.3389, 2.852249  
44727, 13120, 1141.2770, 2.852094  
44728, 12690, 1141.2150, 2.851940  
44729, 12498, 1141.1531, 2.851785  
44730, 12300, 1141.0912, 2.851630  
44731, 11754, 1141.0293, 2.851475  
44732, 10924, 1140.9673, 2.851321  
44733, 10284, 1140.9054, 2.851166  
44734, 10226, 1140.8435, 2.851011  
44735, 10622, 1140.7816, 2.850856  
44736, 10960, 1140.7196, 2.850702  
44737, 10934, 1140.6577, 2.850547  
44738, 10772, 1140.5958, 2.850392  
44739, 10976, 1140.5338, 2.850237  
44740, 11736, 1140.4719, 2.850083  
44741, 12708, 1140.4100, 2.849928  
44742, 13380, 1140.3481, 2.849773  
44743, 13574, 1140.2861, 2.849618  
44744, 13540, 1140.2242, 2.849463  
44745, 13564, 1140.1623, 2.849309  
44746, 13624, 1140.1004, 2.849154  
44747, 13508, 1140.0384, 2.848999  
44748, 13240, 1139.9765, 2.848844  
44749, 13212, 1139.9146, 2.848690  
44750, 13800, 1139.8527, 2.848535  
44751, 14888, 1139.7907, 2.848380  
44752, 15838, 1139.7288, 2.848225  
44753, 16036, 1139.6669, 2.848071  
44754, 15412, 1139.6049, 2.847916  
44755, 14460, 1139.5430, 2.847761  
44756, 13724, 1139.4811, 2.847606  
44757, 13326, 1139.4192, 2.847452  
44758, 12992, 1139.3572, 2.847297  
44759, 12462, 1139.2953, 2.847142  
44760, 11764, 1139.2334, 2.846987  
44761, 11140, 1139.1715, 2.846833  
44762, 10778, 1139.1095, 2.846678  
44763, 10670, 1139.0476, 2.846523  
44764, 10740, 1138.9857, 2.846368  
44765, 10914, 1138.9238, 2.846214  
44766, 11086, 1138.8618, 2.846059  
44767, 11042, 1138.7999, 2.845904  
44768, 10600, 1138.7380, 2.845749  
44769, 9866, 1138.6760, 2.845595  
44770, 9278, 1138.6141, 2.845440  
44771, 9250, 1138.5522, 2.845285  
44772, 9768, 1138.4903, 2.845130  
44773, 10380, 1138.4283, 2.844976  
44774, 10672, 1138.3664, 2.844821  
44775, 10686, 1138.3045, 2.844666  
44776, 10834, 1138.2426, 2.844511  
44777, 11346, 1138.1806, 2.844356  
44778, 11908, 1138.1187, 2.844202  
44779, 11960, 1138.0568, 2.844047  
44780, 11376, 1137.9948, 2.843892  
44781, 10744, 1137.9329, 2.843737  
44782, 10826, 1137.8710, 2.843583  
44783, 11816, 1137.8091, 2.843428  
44784, 13086, 1137.7471, 2.843273  
44785, 13826, 1137.6852, 2.843118  
44786, 13818, 1137.6233, 2.842964  
44787, 13554, 1137.5614, 2.842809  
44788, 13564, 1137.4994, 2.842654  
44789, 13774, 1137.4375, 2.842499  
44790, 13636, 1137.3756, 2.842345  
44791, 12862, 1137.3137, 2.842190  
44792, 11912, 1137.2517, 2.842035  
44793, 11606, 1137.1898, 2.841880  
44794, 12276, 1137.1279, 2.841726  
44795, 13384, 1137.0659, 2.841571  
44796, 14024, 1137.0040, 2.841416  
44797, 13794, 1136.9421, 2.841261  
44798, 13100, 1136.8802, 2.841107  
44799, 12628, 1136.8182, 2.840952  
44800, 12622, 1136.7563, 2.840797  
44801, 12754, 1136.6944, 2.840642  
44802, 12638, 1136.6325, 2.840488  
44803, 12352, 1136.5705, 2.840333  
44804, 12298, 1136.5086, 2.840178  
44805, 12662, 1136.4467, 2.840023  
44806, 13096, 1136.3847, 2.839869  
44807, 13072, 1136.3228, 2.839714  
44808, 12422, 1136.2609, 2.839559  
44809, 11546, 1136.1990, 2.839404  
44810, 11002, 1136.1370, 2.839249  
44811, 10968, 1136.0751, 2.839095  
44812, 11170, 1136.0132, 2.838940  
44813, 11266, 1135.9513, 2.838785  
44814, 11236, 1135.8893, 2.838630  
44815, 11330, 1135.8274, 2.838476  
44816, 11710, 1135.7655, 2.838321  
44817, 12242, 1135.7036, 2.838166  
44818, 12644, 1135.6416, 2.838011  
44819, 12756, 1135.5797, 2.837857  
44820, 12624, 1135.5178, 2.837702  
44821, 12334, 1135.4558, 2.837547  
44822, 11888, 1135.3939, 2.837392  
44823, 11334, 1135.3320, 2.837238  
44824, 10878, 1135.2701, 2.837083  
44825, 10808, 1135.2081, 2.836928  
44826, 11184, 1135.1462, 2.836773  
44827, 11728, 1135.0843, 2.836619  
44828, 12078, 1135.0224, 2.836464  
44829, 12176, 1134.9604, 2.836309  
44830, 12362, 1134.8985, 2.836154  
44831, 12966, 1134.8366, 2.836000  
44832, 13882, 1134.7746, 2.835845  
44833, 14580, 1134.7127, 2.835690  
44834, 14618, 1134.6508, 2.835535  
44835, 14078, 1134.5889, 2.835381  
44836, 13448, 1134.5269, 2.835226  
44837, 13086, 1134.4650, 2.835071  
44838, 12874, 1134.4031, 2.834916  
44839, 12470, 1134.3412, 2.834762  
44840, 11810, 1134.2792, 2.834607  
44841, 11296, 1134.2173, 2.834452  
44842, 11384, 1134.1554, 2.834297  
44843, 12104, 1134.0935, 2.834142  
44844, 13008, 1134.0315, 2.833988  
44845, 13628, 1133.9696, 2.833833  
44846, 13920, 1133.9077, 2.833678  
44847, 14130, 1133.8457, 2.833523  
44848, 14348, 1133.7838, 2.833369  
44849, 14280, 1133.7219, 2.833214  
44850, 13598, 1133.6600, 2.833059  
44851, 12424, 1133.5980, 2.832904  
44852, 11378, 1133.5361, 2.832750  
44853, 11034, 1133.4742, 2.832595  
44854, 11402, 1133.4123, 2.832440  
44855, 11952, 1133.3503, 2.832285  
44856, 12208, 1133.2884, 2.832131  
44857, 12232, 1133.2265, 2.831976  
44858, 12474, 1133.1645, 2.831821  
44859, 13214, 1133.1026, 2.831666  
44860, 14226, 1133.0407, 2.831512  
44861, 15018, 1132.9788, 2.831357  
44862, 15330, 1132.9168, 2.831202  
44863, 15298, 1132.8549, 2.831047  
44864, 15140, 1132.7930, 2.830893  
44865, 14818, 1132.7311, 2.830738  
44866, 14122, 1132.6691, 2.830583  
44867, 13074, 1132.6072, 2.830428  
44868, 12082, 1132.5453, 2.830274  
44869, 11654, 1132.4834, 2.830119  
44870, 11878, 1132.4214, 2.829964  
44871, 12348, 1132.3595, 2.829809  
44872, 12598, 1132.2976, 2.829655  
44873, 12592, 1132.2356, 2.829500  
44874, 12682, 1132.1737, 2.829345

44875, 13124, 1132.1118, 2.829190  
44876, 13744, 1132.0499, 2.829035  
44877, 14092, 1131.9879, 2.828881  
44878, 14004, 1131.9260, 2.828726  
44879, 13800, 1131.8641, 2.828571  
44880, 13950, 1131.8022, 2.828416  
44881, 14532, 1131.7402, 2.828262  
44882, 15104, 1131.6783, 2.828107  
44883, 15168, 1131.6164, 2.827952  
44884, 14674, 1131.5544, 2.827797  
44885, 14022, 1131.4925, 2.827643  
44886, 13596, 1131.4306, 2.827488  
44887, 13370, 1131.3687, 2.827333  
44888, 12988, 1131.3067, 2.827178  
44889, 12222, 1131.2448, 2.827024  
44890, 11254, 1131.1829, 2.826869  
44891, 10482, 1131.1210, 2.826714  
44892, 10146, 1131.0590, 2.826559  
44893, 10144, 1130.9971, 2.826405  
44894, 10260, 1130.9352, 2.826250  
44895, 10402, 1130.8733, 2.826095  
44896, 10652, 1130.8113, 2.825940  
44897, 11058, 1130.7494, 2.825786  
44898, 11546, 1130.6875, 2.825631  
44899, 12020, 1130.6255, 2.825476  
44900, 12526, 1130.5636, 2.825321  
44901, 13174, 1130.5017, 2.825167  
44902, 13892, 1130.4398, 2.825012  
44903, 14366, 1130.3778, 2.824857  
44904, 14246, 1130.3159, 2.824702  
44905, 13498, 1130.2540, 2.824548  
44906, 12450, 1130.1921, 2.824393  
44907, 11534, 1130.1301, 2.824238  
44908, 10972, 1130.0682, 2.824083  
44909, 10758, 1130.0063, 2.823928  
44910, 10872, 1129.9443, 2.823774  
44911, 11410, 1129.8824, 2.823619  
44912, 12368, 1129.8205, 2.823464  
44913, 13392, 1129.7586, 2.823309  
44914, 13888, 1129.6966, 2.823155  
44915, 13492, 1129.6347, 2.823000  
44916, 12508, 1129.5728, 2.822845  
44917, 11716, 1129.5109, 2.822690  
44918, 11744, 1129.4489, 2.822536  
44919, 12566, 1129.3870, 2.822381  
44920, 13586, 1129.3251, 2.822226  
44921, 14190, 1129.2632, 2.822071  
44922, 14190, 1129.2012, 2.821917  
44923, 13766, 1129.1393, 2.821762  
44924, 13146, 1129.0774, 2.821607  
44925, 12412, 1129.0154, 2.821452  
44926, 11668, 1128.9535, 2.821298  
44927, 11184, 1128.8916, 2.821143  
44928, 11238, 1128.8297, 2.820988  
44929, 11756, 1128.7677, 2.820833  
44930, 12270, 1128.7058, 2.820679  
44931, 12302, 1128.6439, 2.820524  
44932, 11822, 1128.5820, 2.820369  
44933, 11276, 1128.5200, 2.820214  
44934, 11126, 1128.4581, 2.820060  
44935, 11328, 1128.3962, 2.819905  
44936, 11422, 1128.3342, 2.819750  
44937, 11086, 1128.2723, 2.819595  
44938, 10502, 1128.2104, 2.819441  
44939, 10164, 1128.1485, 2.819286  
44940, 10330, 1128.0865, 2.819131  
44941, 10710, 1128.0246, 2.818976  
44942, 10856, 1127.9627, 2.818821  
44943, 10692, 1127.9008, 2.818667  
44944, 10626, 1127.8388, 2.818512  
44945, 11094, 1127.7769, 2.818357  
44946, 12040, 1127.7150, 2.818202  
44947, 12922, 1127.6531, 2.818048  
44948, 13260, 1127.5911, 2.817893  
44949, 13050, 1127.5292, 2.817738  
44950, 12658, 1127.4673, 2.817583

44951, 12344, 1127.4053, 2.817429  
44952, 12020, 1127.3434, 2.817274  
44953, 11482, 1127.2815, 2.817119  
44954, 10808, 1127.2196, 2.816964  
44955, 10376, 1127.1576, 2.816810  
44956, 10466, 1127.0957, 2.816655  
44957, 10922, 1127.0338, 2.816500  
44958, 11290, 1126.9719, 2.816345  
44959, 11306, 1126.9099, 2.816191  
44960, 11156, 1126.8480, 2.816036  
44961, 11230, 1126.7861, 2.815881  
44962, 11668, 1126.7241, 2.815726  
44963, 12220, 1126.6622, 2.815572  
44964, 12528, 1126.6003, 2.815417  
44965, 12536, 1126.5384, 2.815262  
44966, 12456, 1126.4764, 2.815107  
44967, 12452, 1126.4145, 2.814953  
44968, 12432, 1126.3526, 2.814798  
44969, 12240, 1126.2907, 2.814643  
44970, 11980, 1126.2287, 2.814488  
44971, 12002, 1126.1668, 2.814334  
44972, 12510, 1126.1049, 2.814179  
44973, 13222, 1126.0430, 2.814024  
44974, 13540, 1125.9810, 2.813869  
44975, 13092, 1125.9191, 2.813714  
44976, 12058, 1125.8572, 2.813560  
44977, 10944, 1125.7952, 2.813405  
44978, 10032, 1125.7333, 2.813250  
44979, 9184, 1125.6714, 2.813095  
44980, 8190, 1125.6095, 2.812941  
44981, 7196, 1125.5475, 2.812786  
44982, 6698, 1125.4856, 2.812631  
44983, 7016, 1125.4237, 2.812476  
44984, 7874, 1125.3618, 2.812322  
44985, 8584, 1125.2998, 2.812167  
44986, 8690, 1125.2379, 2.812012  
44987, 8372, 1125.1760, 2.811857  
44988, 8208, 1125.1141, 2.811703  
44989, 8600, 1125.0521, 2.811548  
44990, 9450, 1124.9902, 2.811393  
44991, 10414, 1124.9283, 2.811238  
44992, 11290, 1124.8663, 2.811084  
44993, 12106, 1124.8044, 2.810929  
44994, 12826, 1124.7425, 2.810774  
44995, 13188, 1124.6806, 2.810619  
44996, 12948, 1124.6186, 2.810465  
44997, 12274, 1124.5567, 2.810310  
44998, 11762, 1124.4948, 2.810155  
44999, 11964, 1124.4329, 2.810000  
45000, 12878, 1124.3709, 2.809846  
45001, 13962, 1124.3090, 2.809691  
45002, 14698, 1124.2471, 2.809536  
45003, 15034, 1124.1851, 2.809381  
45004, 15248, 1124.1232, 2.809226  
45005, 15472, 1124.0613, 2.809072  
45006, 15428, 1123.9994, 2.808917  
45007, 14782, 1123.9374, 2.808762  
45008, 13668, 1123.8755, 2.808607  
45009, 12718, 1123.8136, 2.808453  
45010, 12502, 1123.7517, 2.808298  
45011, 12952, 1123.6897, 2.808143  
45012, 13420, 1123.6278, 2.807988  
45013, 13352, 1123.5659, 2.807834  
45014, 12840, 1123.5040, 2.807679  
45015, 12438, 1123.4420, 2.807524  
45016, 12540, 1123.3801, 2.807369  
45017, 12962, 1123.3182, 2.807215  
45018, 13176, 1123.2562, 2.807060  
45019, 12902, 1123.1943, 2.806905  
45020, 12340, 1123.1324, 2.806750  
45021, 11886, 1123.0705, 2.806596  
45022, 11666, 1123.0085, 2.806441  
45023, 11508, 1122.9466, 2.806286  
45024, 11264, 1122.8847, 2.806131  
45025, 11104, 1122.8228, 2.805977  
45026, 11288, 1122.7608, 2.805822

45027, 11808, 1122.6989, 2.805667  
45028, 12292, 1122.6370, 2.805512  
45029, 12370, 1122.5750, 2.805358  
45030, 12072, 1122.5131, 2.805203  
45031, 11802, 1122.4512, 2.805048  
45032, 11854, 1122.3893, 2.804893  
45033, 12054, 1122.3273, 2.804739  
45034, 11934, 1122.2654, 2.804584  
45035, 11252, 1122.2035, 2.804429  
45036, 10262, 1122.1416, 2.804274  
45037, 9478, 1122.0796, 2.804119  
45038, 9160, 1122.0177, 2.803965  
45039, 9166, 1121.9558, 2.803810  
45040, 9200, 1121.8939, 2.803655  
45041, 9230, 1121.8319, 2.803500  
45042, 9464, 1121.7700, 2.803346  
45043, 10050, 1121.7081, 2.803191  
45044, 10836, 1121.6461, 2.803036  
45045, 11514, 1121.5842, 2.802881  
45046, 11908, 1121.5223, 2.802727  
45047, 12118, 1121.4604, 2.802572  
45048, 12278, 1121.3984, 2.802417  
45049, 12326, 1121.3365, 2.802262  
45050, 12134, 1121.2746, 2.802108  
45051, 11766, 1121.2127, 2.801953  
45052, 11598, 1121.1507, 2.801798  
45053, 11992, 1121.0888, 2.801643  
45054, 12886, 1121.0269, 2.801489  
45055, 13796, 1120.9649, 2.801334  
45056, 14262, 1120.9030, 2.801179  
45057, 14270, 1120.8411, 2.801024  
45058, 14210, 1120.7792, 2.800870  
45059, 14414, 1120.7172, 2.800715  
45060, 14762, 1120.6553, 2.800560  
45061, 14888, 1120.5934, 2.800405  
45062, 14596, 1120.5315, 2.800251  
45063, 14154, 1120.4695, 2.800096  
45064, 13948, 1120.4076, 2.799941  
45065, 14082, 1120.3457, 2.799786  
45066, 14280, 1120.2838, 2.799632  
45067, 14232, 1120.2218, 2.799477  
45068, 13992, 1120.1599, 2.799322  
45069, 13912, 1120.0980, 2.799167  
45070, 14226, 1120.0360, 2.799012  
45071, 14772, 1119.9741, 2.798858  
45072, 15170, 1119.9122, 2.798703  
45073, 15246, 1119.8503, 2.798548  
45074, 15182, 1119.7883, 2.798393  
45075, 15274, 1119.7264, 2.798239  
45076, 15544, 1119.6645, 2.798084  
45077, 15722, 1119.6026, 2.797929  
45078, 15560, 1119.5406, 2.797774  
45079, 15112, 1119.4787, 2.797620  
45080, 14676, 1119.4168, 2.797465  
45081, 14450, 1119.3548, 2.797310  
45082, 14396, 1119.2929, 2.797155  
45083, 14404, 1119.2310, 2.797001  
45084, 14502, 1119.1691, 2.796846  
45085, 14826, 1119.1071, 2.796691  
45086, 15348, 1119.0452, 2.796536  
45087, 15778, 1118.9833, 2.796382  
45088, 15806, 1118.9214, 2.796227  
45089, 15438, 1118.8594, 2.796072  
45090, 15040, 1118.7975, 2.795917  
45091, 14954, 1118.7356, 2.795763  
45092, 15108, 1118.6737, 2.795608  
45093, 15134, 1118.6117, 2.795453  
45094, 14776, 1118.5498, 2.795298  
45095, 14246, 1118.4879, 2.795144  
45096, 13978, 1118.4259, 2.794989  
45097, 14124, 1118.3640, 2.794834  
45098, 14356, 1118.3021, 2.794679  
45099, 14216, 1118.2402, 2.794525  
45100, 13644, 1118.1782, 2.794370  
45101, 13066, 1118.1163, 2.794215  
45102, 12954, 1118.0544, 2.794060

45103, 13298, 1117.9925, 2.793905  
45104, 13618, 1117.9305, 2.793751  
45105, 13474, 1117.8686, 2.793596  
45106, 12910, 1117.8067, 2.793441  
45107, 12324, 1117.7447, 2.793286  
45108, 12018, 1117.6828, 2.793132  
45109, 11924, 1117.6209, 2.792977  
45110, 11804, 1117.5590, 2.792822  
45111, 11696, 1117.4970, 2.792667  
45112, 11914, 1117.4351, 2.792513  
45113, 12732, 1117.3732, 2.792358  
45114, 13998, 1117.3113, 2.792203  
45115, 15220, 1117.2493, 2.792048  
45116, 16006, 1117.1874, 2.791894  
45117, 16336, 1117.1255, 2.791739  
45118, 16432, 1117.0636, 2.791584  
45119, 16388, 1117.0016, 2.791429  
45120, 16082, 1116.9397, 2.791275  
45121, 15430, 1116.8778, 2.791120  
45122, 14658, 1116.8158, 2.790965  
45123, 14166, 1116.7539, 2.790810  
45124, 14122, 1116.6920, 2.790656  
45125, 14234, 1116.6301, 2.790501  
45126, 14026, 1116.5681, 2.790346  
45127, 13352, 1116.5062, 2.790191  
45128, 12536, 1116.4443, 2.790037  
45129, 12022, 1116.3824, 2.789882  
45130, 11914, 1116.3204, 2.789727  
45131, 11942, 1116.2585, 2.789572  
45132, 11832, 1116.1966, 2.789418  
45133, 11678, 1116.1346, 2.789263  
45134, 11784, 1116.0727, 2.789108  
45135, 12252, 1116.0108, 2.788953  
45136, 12756, 1115.9489, 2.788798  
45137, 12840, 1115.8869, 2.788644  
45138, 12382, 1115.8250, 2.788489  
45139, 11692, 1115.7631, 2.788334  
45140, 11170, 1115.7012, 2.788179  
45141, 10912, 1115.6392, 2.788025  
45142, 10700, 1115.5773, 2.787870  
45143, 10390, 1115.5154, 2.787715  
45144, 10162, 1115.4535, 2.787560  
45145, 10326, 1115.3915, 2.787406  
45146, 10942, 1115.3296, 2.787251  
45147, 11688, 1115.2677, 2.787096  
45148, 12210, 1115.2057, 2.786941  
45149, 12450, 1115.1438, 2.786787  
45150, 12674, 1115.0819, 2.786632  
45151, 13062, 1115.0200, 2.786477  
45152, 13456, 1114.9580, 2.786322  
45153, 13538, 1114.8961, 2.786168  
45154, 13226, 1114.8342, 2.786013  
45155, 12842, 1114.7723, 2.785858  
45156, 12790, 1114.7103, 2.785703  
45157, 13136, 1114.6484, 2.785549  
45158, 13566, 1114.5865, 2.785394  
45159, 13770, 1114.5245, 2.785239  
45160, 13758, 1114.4626, 2.785084  
45161, 13788, 1114.4007, 2.784930  
45162, 13958, 1114.3388, 2.784775  
45163, 14022, 1114.2768, 2.784620  
45164, 13630, 1114.2149, 2.784465  
45165, 12766, 1114.1530, 2.784311  
45166, 11788, 1114.0911, 2.784156  
45167, 11136, 1114.0291, 2.784001  
45168, 10938, 1113.9672, 2.783846  
45169, 11064, 1113.9053, 2.783691  
45170, 11444, 1113.8434, 2.783537  
45171, 12180, 1113.7814, 2.783382  
45172, 13300, 1113.7195, 2.783227  
45173, 14436, 1113.6576, 2.783072  
45174, 14978, 1113.5956, 2.782918  
45175, 14638, 1113.5337, 2.782763  
45176, 13848, 1113.4718, 2.782608  
45177, 13454, 1113.4099, 2.782453  
45178, 13956, 1113.3479, 2.782299

45179, 14976, 1113.2860, 2.782144  
45180, 15656, 1113.2241, 2.781989  
45181, 15508, 1113.1622, 2.781834  
45182, 14888, 1113.1002, 2.781680  
45183, 14572, 1113.0383, 2.781525  
45184, 14958, 1112.9764, 2.781370  
45185, 15670, 1112.9145, 2.781215  
45186, 16038, 1112.8525, 2.781061  
45187, 15784, 1112.7906, 2.780906  
45188, 15262, 1112.7287, 2.780751  
45189, 14978, 1112.6667, 2.780596  
45190, 15036, 1112.6048, 2.780442  
45191, 15128, 1112.5429, 2.780287  
45192, 14942, 1112.4810, 2.780132  
45193, 14604, 1112.4190, 2.779977  
45194, 14470, 1112.3571, 2.779823  
45195, 14726, 1112.2952, 2.779668  
45196, 15158, 1112.2333, 2.779513  
45197, 15438, 1112.1713, 2.779358  
45198, 15514, 1112.1094, 2.779204  
45199, 15618, 1112.0475, 2.779049  
45200, 15950, 1111.9855, 2.778894  
45201, 16376, 1111.9236, 2.778739  
45202, 16566, 1111.8617, 2.778584  
45203, 16394, 1111.7998, 2.778430  
45204, 16088, 1111.7378, 2.778275  
45205, 15958, 1111.6759, 2.778120  
45206, 16024, 1111.6140, 2.777965  
45207, 16008, 1111.5521, 2.777811  
45208, 15704, 1111.4901, 2.777656  
45209, 15270, 1111.4282, 2.777501  
45210, 15082, 1111.3663, 2.777346  
45211, 15308, 1111.3044, 2.777192  
45212, 15648, 1111.2424, 2.777037  
45213, 15608, 1111.1805, 2.776882  
45214, 15008, 1111.1186, 2.776727  
45215, 14166, 1111.0566, 2.776573  
45216, 13576, 1110.9947, 2.776418  
45217, 13482, 1110.9328, 2.776263  
45218, 13710, 1110.8709, 2.776108  
45219, 13946, 1110.8089, 2.775954  
45220, 14050, 1110.7470, 2.775799  
45221, 14094, 1110.6851, 2.775644  
45222, 14168, 1110.6232, 2.775489  
45223, 14292, 1110.5612, 2.775335  
45224, 14472, 1110.4993, 2.775180  
45225, 14848, 1110.4374, 2.775025  
45226, 15542, 1110.3754, 2.774870  
45227, 16440, 1110.3135, 2.774716  
45228, 17096, 1110.2516, 2.774561  
45229, 17034, 1110.1897, 2.774406  
45230, 16130, 1110.1277, 2.774251  
45231, 14750, 1110.0658, 2.774097  
45232, 13452, 1110.0039, 2.773942  
45233, 12548, 1109.9420, 2.773787  
45234, 12010, 1109.8800, 2.773632  
45235, 11674, 1109.8181, 2.773477  
45236, 11516, 1109.7562, 2.773323  
45237, 11638, 1109.6943, 2.773168  
45238, 12084, 1109.6323, 2.773013  
45239, 12664, 1109.5704, 2.772858  
45240, 13122, 1109.5085, 2.772704  
45241, 13312, 1109.4465, 2.772549  
45242, 13288, 1109.3846, 2.772394  
45243, 13126, 1109.3227, 2.772239  
45244, 12774, 1109.2608, 2.772085  
45245, 12188, 1109.1988, 2.771930  
45246, 11508, 1109.1369, 2.771775  
45247, 11096, 1109.0750, 2.771620  
45248, 11296, 1109.0131, 2.771466  
45249, 12126, 1108.9511, 2.771311  
45250, 13262, 1108.8892, 2.771156  
45251, 14292, 1108.8273, 2.771001  
45252, 14998, 1108.7653, 2.770847  
45253, 15370, 1108.7034, 2.770692  
45254, 15434, 1108.6415, 2.770537

45255, 15166, 1108.5796, 2.770382  
45256, 14594, 1108.5176, 2.770228  
45257, 13914, 1108.4557, 2.770073  
45258, 13398, 1108.3938, 2.769918  
45259, 13174, 1108.3319, 2.769763  
45260, 13116, 1108.2699, 2.769609  
45261, 13014, 1108.2080, 2.769454  
45262, 12858, 1108.1461, 2.769299  
45263, 12842, 1108.0842, 2.769144  
45264, 13102, 1108.0222, 2.768990  
45265, 13472, 1107.9603, 2.768835  
45266, 13632, 1107.8984, 2.768680  
45267, 13470, 1107.8364, 2.768525  
45268, 13306, 1107.7745, 2.768370  
45269, 13612, 1107.7126, 2.768216  
45270, 14488, 1107.6507, 2.768061  
45271, 15504, 1107.5887, 2.767906  
45272, 16094, 1107.5268, 2.767751  
45273, 16092, 1107.4649, 2.767597  
45274, 15872, 1107.4030, 2.767442  
45275, 15870, 1107.3410, 2.767287  
45276, 16094, 1107.2791, 2.767132  
45277, 16090, 1107.2172, 2.766978  
45278, 15484, 1107.1552, 2.766823  
45279, 14426, 1107.0933, 2.766668  
45280, 13506, 1107.0314, 2.766513  
45281, 13228, 1106.9695, 2.766359  
45282, 13572, 1106.9075, 2.766204  
45283, 14142, 1106.8456, 2.766049  
45284, 14594, 1106.7837, 2.765894  
45285, 14904, 1106.7218, 2.765740  
45286, 15212, 1106.6598, 2.765585  
45287, 15542, 1106.5979, 2.765430  
45288, 15762, 1106.5360, 2.765275  
45289, 15810, 1106.4741, 2.765121  
45290, 15812, 1106.4121, 2.764966  
45291, 15944, 1106.3502, 2.764811  
45292, 16174, 1106.2883, 2.764656  
45293, 16272, 1106.2263, 2.764502  
45294, 16118, 1106.1644, 2.764347  
45295, 15940, 1106.1025, 2.764192  
45296, 16116, 1106.0406, 2.764037  
45297, 16708, 1105.9786, 2.763882  
45298, 17284, 1105.9167, 2.763728  
45299, 17286, 1105.8548, 2.763573  
45300, 16586, 1105.7929, 2.763418  
45301, 15656, 1105.7309, 2.763263  
45302, 15106, 1105.6690, 2.763109  
45303, 15096, 1105.6071, 2.762954  
45304, 15250, 1105.5451, 2.762799  
45305, 15144, 1105.4832, 2.762644  
45306, 14788, 1105.4213, 2.762490  
45307, 14588, 1105.3594, 2.762335  
45308, 14800, 1105.2974, 2.762180  
45309, 15198, 1105.2355, 2.762025  
45310, 15260, 1105.1736, 2.761871  
45311, 14768, 1105.1117, 2.761716  
45312, 14024, 1105.0497, 2.761561  
45313, 13524, 1104.9878, 2.761406  
45314, 13398, 1104.9259, 2.761252  
45315, 13280, 1104.8640, 2.761097  
45316, 12724, 1104.8020, 2.760942  
45317, 11708, 1104.7401, 2.760787  
45318, 10680, 1104.6782, 2.760633  
45319, 10088, 1104.6162, 2.760478  
45320, 9976, 1104.5543, 2.760323  
45321, 10030, 1104.4924, 2.760168  
45322, 9898, 1104.4305, 2.760014  
45323, 9542, 1104.3685, 2.759859  
45324, 9144, 1104.3066, 2.759704  
45325, 8878, 1104.2447, 2.759549  
45326, 8828, 1104.1828, 2.759395  
45327, 9044, 1104.1208, 2.759240  
45328, 9588, 1104.0589, 2.759085  
45329, 10420, 1103.9970, 2.758930  
45330, 11288, 1103.9350, 2.758775

45331, 11858, 1103.8731, 2.758621  
45332, 12026, 1103.8112, 2.758466  
45333, 12086, 1103.7493, 2.758311  
45334, 12428, 1103.6873, 2.758156  
45335, 13152, 1103.6254, 2.758002  
45336, 13902, 1103.5635, 2.757847  
45337, 14254, 1103.5016, 2.757692  
45338, 14160, 1103.4396, 2.757537  
45339, 14002, 1103.3777, 2.757383  
45340, 14178, 1103.3158, 2.757228  
45341, 14634, 1103.2539, 2.757073  
45342, 14954, 1103.1919, 2.756918  
45343, 14834, 1103.1300, 2.756764  
45344, 14404, 1103.0681, 2.756609  
45345, 14068, 1103.0061, 2.756454  
45346, 14012, 1102.9442, 2.756299  
45347, 14016, 1102.8823, 2.756145  
45348, 13784, 1102.8204, 2.755990  
45349, 13362, 1102.7584, 2.755835  
45350, 13156, 1102.6965, 2.755680  
45351, 13448, 1102.6346, 2.755526  
45352, 14008, 1102.5727, 2.755371  
45353, 14240, 1102.5107, 2.755216  
45354, 13800, 1102.4488, 2.755061  
45355, 12960, 1102.3869, 2.754907  
45356, 12342, 1102.3249, 2.754752  
45357, 12300, 1102.2630, 2.754597  
45358, 12660, 1102.2011, 2.754442  
45359, 12988, 1102.1392, 2.754288  
45360, 13094, 1102.0772, 2.754133  
45361, 13134, 1102.0153, 2.753978  
45362, 13260, 1101.9534, 2.753823  
45363, 13330, 1101.8915, 2.753668  
45364, 13030, 1101.8295, 2.753514  
45365, 12312, 1101.7676, 2.753359  
45366, 11562, 1101.7057, 2.753204  
45367, 11262, 1101.6438, 2.753049  
45368, 11498, 1101.5818, 2.752895  
45369, 11904, 1101.5199, 2.752740  
45370, 12088, 1101.4580, 2.752585  
45371, 12080, 1101.3960, 2.752430  
45372, 12216, 1101.3341, 2.752276  
45373, 12690, 1101.2722, 2.752121  
45374, 13210, 1101.2103, 2.751966  
45375, 13312, 1101.1483, 2.751811  
45376, 12876, 1101.0864, 2.751657  
45377, 12300, 1101.0245, 2.751502  
45378, 12100, 1100.9626, 2.751347  
45379, 12346, 1100.9006, 2.751192  
45380, 12628, 1100.8387, 2.751038  
45381, 12546, 1100.7768, 2.750883  
45382, 12176, 1100.7148, 2.750728  
45383, 11978, 1100.6529, 2.750573  
45384, 12276, 1100.5910, 2.750419  
45385, 12886, 1100.5291, 2.750264  
45386, 13340, 1100.4671, 2.750109  
45387, 13358, 1100.4052, 2.749954  
45388, 13094, 1100.3433, 2.749800  
45389, 12846, 1100.2814, 2.749645  
45390, 12674, 1100.2194, 2.749490  
45391, 12394, 1100.1575, 2.749335  
45392, 11940, 1100.0956, 2.749181  
45393, 11586, 1100.0337, 2.749026  
45394, 11716, 1099.9717, 2.748871  
45395, 12378, 1099.9098, 2.748716  
45396, 13182, 1099.8479, 2.748561  
45397, 13662, 1099.7859, 2.748407  
45398, 13772, 1099.7240, 2.748252  
45399, 13884, 1099.6621, 2.748097  
45400, 14310, 1099.6002, 2.747942  
45401, 14908, 1099.5382, 2.747788  
45402, 15196, 1099.4763, 2.747633  
45403, 14920, 1099.4144, 2.747478  
45404, 14360, 1099.3525, 2.747323  
45405, 14062, 1099.2905, 2.747169  
45406, 14302, 1099.2286, 2.747014  
45407, 14806, 1099.1667, 2.746859  
45408, 15116, 1099.1048, 2.746704  
45409, 15054, 1099.0428, 2.746550  
45410, 14852, 1098.9809, 2.746395  
45411, 14814, 1098.9190, 2.746240  
45412, 14970, 1098.8570, 2.746085  
45413, 15120, 1098.7951, 2.745931  
45414, 15162, 1098.7332, 2.745776  
45415, 15272, 1098.6713, 2.745621  
45416, 15662, 1098.6093, 2.745466  
45417, 16278, 1098.5474, 2.745312  
45418, 16780, 1098.4855, 2.745157  
45419, 16892, 1098.4236, 2.745002  
45420, 16664, 1098.3616, 2.744847  
45421, 16362, 1098.2997, 2.744693  
45422, 16120, 1098.2378, 2.744538  
45423, 15784, 1098.1758, 2.744383  
45424, 15174, 1098.1139, 2.744228  
45425, 14444, 1098.0520, 2.744074  
45426, 14046, 1097.9901, 2.743919  
45427, 14254, 1097.9281, 2.743764  
45428, 14824, 1097.8662, 2.743609  
45429, 15150, 1097.8043, 2.743454  
45430, 14854, 1097.7424, 2.743300  
45431, 14160, 1097.6804, 2.743145  
45432, 13636, 1097.6185, 2.742990  
45433, 13590, 1097.5566, 2.742835  
45434, 13760, 1097.4947, 2.742681  
45435, 13638, 1097.4327, 2.742526  
45436, 13026, 1097.3708, 2.742371  
45437, 12230, 1097.3089, 2.742216  
45438, 11710, 1097.2469, 2.742062  
45439, 11592, 1097.1850, 2.741907  
45440, 11628, 1097.1231, 2.741752  
45441, 11574, 1097.0612, 2.741597  
45442, 11522, 1096.9992, 2.741443  
45443, 11802, 1096.9373, 2.741288  
45444, 12552, 1096.8754, 2.741133  
45445, 13506, 1096.8135, 2.740978  
45446, 14172, 1096.7515, 2.740824  
45447, 14316, 1096.6896, 2.740669  
45448, 14114, 1096.6277, 2.740514  
45449, 13918, 1096.5657, 2.740359  
45450, 13910, 1096.5038, 2.740205  
45451, 13992, 1096.4419, 2.740050  
45452, 14006, 1096.3800, 2.739895  
45453, 13954, 1096.3180, 2.739740  
45454, 13972, 1096.2561, 2.739586  
45455, 14114, 1096.1942, 2.739431  
45456, 14238, 1096.1323, 2.739276  
45457, 14128, 1096.0703, 2.739121  
45458, 13696, 1096.0084, 2.738967  
45459, 13026, 1095.9465, 2.738812  
45460, 12264, 1095.8846, 2.738657  
45461, 11518, 1095.8226, 2.738502  
45462, 10888, 1095.7607, 2.738347  
45463, 10528, 1095.6988, 2.738193  
45464, 10598, 1095.6368, 2.738038  
45465, 11092, 1095.5749, 2.737883  
45466, 11746, 1095.5130, 2.737728  
45467, 12216, 1095.4511, 2.737574  
45468, 12324, 1095.3891, 2.737419  
45469, 12194, 1095.3272, 2.737264  
45470, 12070, 1095.2653, 2.737109  
45471, 12066, 1095.2034, 2.736955  
45472, 12068, 1095.1414, 2.736800  
45473, 11894, 1095.0795, 2.736645  
45474, 11512, 1095.0176, 2.736490  
45475, 11076, 1094.9556, 2.736336  
45476, 10798, 1094.8937, 2.736181  
45477, 10782, 1094.8318, 2.736026  
45478, 10966, 1094.7699, 2.735871  
45479, 11234, 1094.7079, 2.735717  
45480, 11436, 1094.6460, 2.735562  
45481, 11444, 1094.5841, 2.735407  
45482, 11252, 1094.5222, 2.735252  
45483, 11044, 1094.4602, 2.735098  
45484, 11206, 1094.3983, 2.734943  
45485, 12036, 1094.3364, 2.734788  
45486, 13446, 1094.2745, 2.734633  
45487, 14884, 1094.2125, 2.734479  
45488, 15706, 1094.1506, 2.734324  
45489, 15646, 1094.0887, 2.734169  
45490, 15026, 1094.0267, 2.734014  
45491, 14424, 1093.9648, 2.733860  
45492, 14184, 1093.9029, 2.733705  
45493, 14190, 1093.8410, 2.733550  
45494, 14120, 1093.7790, 2.733395  
45495, 13852, 1093.7171, 2.733240  
45496, 13572, 1093.6552, 2.733086  
45497, 13490, 1093.5933, 2.732931  
45498, 13566, 1093.5313, 2.732776  
45499, 13506, 1093.4694, 2.732621  
45500, 13080, 1093.4075, 2.732467  
45501, 12342, 1093.3455, 2.732312  
45502, 11548, 1093.2836, 2.732157  
45503, 10934, 1093.2217, 2.732002  
45504, 10614, 1093.1598, 2.731848  
45505, 10664, 1093.0978, 2.731693  
45506, 11200, 1093.0359, 2.731538  
45507, 12198, 1092.9740, 2.731383  
45508, 13310, 1092.9121, 2.731229  
45509, 13924, 1092.8501, 2.731074  
45510, 13628, 1092.7882, 2.730919  
45511, 12606, 1092.7263, 2.730764  
45512, 11552, 1092.6644, 2.730610  
45513, 11116, 1092.6024, 2.730455  
45514, 11382, 1092.5405, 2.730300  
45515, 11902, 1092.4786, 2.730145  
45516, 12238, 1092.4166, 2.729991  
45517, 12390, 1092.3547, 2.729836  
45518, 12680, 1092.2928, 2.729681  
45519, 13310, 1092.2309, 2.729526  
45520, 14056, 1092.1689, 2.729372  
45521, 14510, 1092.1070, 2.729217  
45522, 14548, 1092.0451, 2.729062  
45523, 14404, 1091.9832, 2.728907  
45524, 14388, 1091.9212, 2.728753  
45525, 14494, 1091.8593, 2.728598  
45526, 14462, 1091.7974, 2.728443  
45527, 14176, 1091.7354, 2.728288  
45528, 13864, 1091.6735, 2.728133  
45529, 13916, 1091.6116, 2.727979  
45530, 14396, 1091.5497, 2.727824  
45531, 14902, 1091.4877, 2.727669  
45532, 14962, 1091.4258, 2.727514  
45533, 14512, 1091.3639, 2.727360  
45534, 13926, 1091.3020, 2.727205  
45535, 13594, 1091.2400, 2.727050  
45536, 13506, 1091.1781, 2.726895  
45537, 13318, 1091.1162, 2.726741  
45538, 12824, 1091.0543, 2.726586  
45539, 12256, 1090.9923, 2.726431  
45540, 12060, 1090.9304, 2.726276  
45541, 12442, 1090.8685, 2.726122  
45542, 13142, 1090.8065, 2.725967  
45543, 13726, 1090.7446, 2.725812  
45544, 14032, 1090.6827, 2.725657  
45545, 14250, 1090.6208, 2.725503  
45546, 14636, 1090.5588, 2.725348  
45547, 15192, 1090.4969, 2.725193  
45548, 15712, 1090.4350, 2.725038  
45549, 16032, 1090.3731, 2.724884  
45550, 16152, 1090.3111, 2.724729  
45551, 16086, 1090.2492, 2.724574  
45552, 15710, 1090.1873, 2.724419  
45553, 14910, 1090.1253, 2.724265  
45554, 13862, 1090.0634, 2.724110  
45555, 13114, 1090.0015, 2.723955  
45556, 13180, 1089.9396, 2.723800  
45557, 14014, 1089.8776, 2.723645  
45558, 14966, 1089.8157, 2.723491

45559, 15322, 1089.7538, 2.723336  
45560, 14924, 1089.6919, 2.723181  
45561, 14256, 1089.6299, 2.723026  
45562, 13922, 1089.5680, 2.722872  
45563, 14060, 1089.5061, 2.722717  
45564, 14322, 1089.4442, 2.722562  
45565, 14366, 1089.3822, 2.722407  
45566, 14240, 1089.3203, 2.722253  
45567, 14294, 1089.2584, 2.722098  
45568, 14694, 1089.1964, 2.721943  
45569, 15234, 1089.1345, 2.721788  
45570, 15572, 1088.0726, 2.721634  
45571, 15640, 1089.0107, 2.721479  
45572, 15668, 1088.9487, 2.721324  
45573, 15836, 1088.8868, 2.721169  
45574, 15980, 1088.8249, 2.721015  
45575, 15774, 1088.7630, 2.720860  
45576, 15180, 1088.7010, 2.720705  
45577, 14616, 1088.6391, 2.720550  
45578, 14612, 1088.5772, 2.720396  
45579, 15250, 1088.5152, 2.720241  
45580, 16048, 1088.4533, 2.720086  
45581, 16410, 1088.3914, 2.719931  
45582, 16150, 1088.3295, 2.719777  
45583, 15582, 1088.2675, 2.719622  
45584, 15136, 1088.2056, 2.719467  
45585, 14932, 1088.1437, 2.719312  
45586, 14810, 1088.0818, 2.719158  
45587, 14622, 1088.0198, 2.719003  
45588, 14460, 1087.9579, 2.718848  
45589, 14494, 1087.8960, 2.718693  
45590, 14738, 1087.8341, 2.718538  
45591, 15034, 1087.7721, 2.718384  
45592, 15254, 1087.7102, 2.718229  
45593, 15406, 1087.6483, 2.718074  
45594, 15492, 1087.5863, 2.717919  
45595, 15306, 1087.5244, 2.717765  
45596, 14550, 1087.4625, 2.717610  
45597, 13256, 1087.4006, 2.717455  
45598, 11970, 1087.3386, 2.717300  
45599, 11410, 1087.2767, 2.717146  
45600, 11816, 1087.2148, 2.716991  
45601, 12666, 1087.1529, 2.716836  
45602, 13144, 1087.0909, 2.716681  
45603, 12938, 1087.0290, 2.716527  
45604, 12518, 1086.9671, 2.716372  
45605, 12588, 1086.9051, 2.716217  
45606, 13292, 1086.8432, 2.716062  
45607, 14026, 1086.7813, 2.715908  
45608, 14104, 1086.7194, 2.715753  
45609, 13480, 1086.6574, 2.715598  
45610, 12830, 1086.5955, 2.715443  
45611, 12872, 1086.5336, 2.715289  
45612, 13680, 1086.4717, 2.715134  
45613, 14688, 1086.4097, 2.714979  
45614, 15348, 1086.3478, 2.714824  
45615, 15636, 1086.2859, 2.714670  
45616, 15914, 1086.2240, 2.714515  
45617, 16362, 1086.1620, 2.714360  
45618, 16686, 1086.1001, 2.714205  
45619, 16470, 1086.0382, 2.714051  
45620, 15676, 1085.9762, 2.713896  
45621, 14780, 1085.9143, 2.713741  
45622, 14334, 1085.8524, 2.713586  
45623, 14448, 1085.7905, 2.713431  
45624, 14760, 1085.7285, 2.713277  
45625, 14832, 1085.6666, 2.713122  
45626, 14556, 1085.6047, 2.712967  
45627, 14158, 1085.5428, 2.712812  
45628, 13884, 1085.4808, 2.712658  
45629, 13804, 1085.4189, 2.712503  
45630, 13830, 1085.3570, 2.712348  
45631, 13892, 1085.2951, 2.712193  
45632, 13950, 1085.2331, 2.712039  
45633, 13916, 1085.1712, 2.711884  
45634, 13716, 1085.1093, 2.711729  
45635, 13416, 1085.0473, 2.711574  
45636, 13296, 1084.9854, 2.711420  
45637, 13624, 1084.9235, 2.711265  
45638, 14300, 1084.8616, 2.711110  
45639, 14874, 1084.7996, 2.710955  
45640, 14906, 1084.7377, 2.710801  
45641, 14452, 1084.6758, 2.710646  
45642, 14022, 1084.6139, 2.710491  
45643, 14076, 1084.5519, 2.710336  
45644, 14520, 1084.4900, 2.710182  
45645, 14818, 1084.4281, 2.710027  
45646, 14590, 1084.3661, 2.709872  
45647, 14074, 1084.3042, 2.709717  
45648, 13906, 1084.2423, 2.709563  
45649, 14456, 1084.1804, 2.709408  
45650, 15452, 1084.1184, 2.709253  
45651, 16244, 1084.0565, 2.709098  
45652, 16468, 1083.9946, 2.708944  
45653, 16308, 1083.9327, 2.708789  
45654, 16158, 1083.8707, 2.708634  
45655, 16130, 1083.8088, 2.708479  
45656, 15976, 1083.7469, 2.708324  
45657, 15504, 1083.6850, 2.708170  
45658, 14950, 1083.6230, 2.708015  
45659, 14768, 1083.5611, 2.707860  
45660, 15144, 1083.4992, 2.707705  
45661, 15696, 1083.4372, 2.707551  
45662, 15814, 1083.3753, 2.707396  
45663, 15248, 1083.3134, 2.707241  
45664, 14288, 1083.2515, 2.707086  
45665, 13422, 1083.1895, 2.706932  
45666, 12862, 1083.1276, 2.706777  
45667, 12484, 1083.0657, 2.706622  
45668, 12162, 1083.0038, 2.706467  
45669, 12020, 1082.9418, 2.706313  
45670, 12242, 1082.8799, 2.706158  
45671, 12752, 1082.8180, 2.706003  
45672, 13168, 1082.7560, 2.705848  
45673, 13190, 1082.6941, 2.705694  
45674, 12964, 1082.6322, 2.705539  
45675, 12962, 1082.5703, 2.705384  
45676, 13428, 1082.5083, 2.705229  
45677, 14056, 1082.4464, 2.705075  
45678, 14262, 1082.3845, 2.704920  
45679, 13804, 1082.3226, 2.704765  
45680, 13032, 1082.2606, 2.704610  
45681, 12536, 1082.1987, 2.704456  
45682, 12536, 1082.1368, 2.704301  
45683, 12738, 1082.0749, 2.704146  
45684, 12766, 1082.0129, 2.703991  
45685, 12644, 1081.9510, 2.703837  
45686, 12766, 1081.8891, 2.703682  
45687, 13374, 1081.8271, 2.703527  
45688, 14200, 1081.7652, 2.703372  
45689, 14660, 1081.7033, 2.703217  
45690, 14436, 1081.6414, 2.703063  
45691, 13770, 1081.5794, 2.702908  
45692, 13178, 1081.5175, 2.702753  
45693, 12970, 1081.4556, 2.702598  
45694, 13058, 1081.3937, 2.702444  
45695, 13244, 1081.3317, 2.702289  
45696, 13538, 1081.2698, 2.702134  
45697, 14058, 1081.2079, 2.701979  
45698, 14752, 1081.1459, 2.701825  
45699, 15270, 1081.0840, 2.701670  
45700, 15306, 1081.0221, 2.701515  
45701, 14962, 1080.9602, 2.701360  
45702, 14696, 1080.8982, 2.701206  
45703, 14814, 1080.8363, 2.701051  
45704, 15050, 1080.7744, 2.700896  
45705, 14796, 1080.7125, 2.700741  
45706, 13744, 1080.6505, 2.700587  
45707, 12310, 1080.5886, 2.700432  
45708, 11306, 1080.5267, 2.700277  
45709, 11234, 1080.4648, 2.700122  
45710, 11906, 1080.4028, 2.699968  
45711, 12704, 1080.3409, 2.699813  
45712, 13232, 1080.2790, 2.699658  
45713, 13558, 1080.2170, 2.699503  
45714, 13944, 1080.1551, 2.699349  
45715, 14420, 1080.0932, 2.699194  
45716, 14752, 1080.0313, 2.699039  
45717, 14772, 1079.9693, 2.698884  
45718, 14696, 1079.9074, 2.698730  
45719, 14926, 1079.8455, 2.698575  
45720, 15620, 1079.7836, 2.698420  
45721, 16474, 1079.7216, 2.698265  
45722, 16978, 1079.6597, 2.698110  
45723, 16870, 1079.5978, 2.697956  
45724, 16294, 1079.5358, 2.697801  
45725, 15576, 1079.4739, 2.697646  
45726, 14926, 1079.4120, 2.697491  
45727, 14342, 1079.3501, 2.697337  
45728, 13798, 1079.2881, 2.697182  
45729, 13406, 1079.2262, 2.697027  
45730, 13284, 1079.1643, 2.696872  
45731, 13452, 1079.1024, 2.696718  
45732, 13790, 1079.0404, 2.696563  
45733, 14222, 1078.9785, 2.696408  
45734, 14758, 1078.9166, 2.696253  
45735, 15386, 1078.8547, 2.696099  
45736, 15906, 1078.7927, 2.695944  
45737, 16006, 1078.7308, 2.695789  
45738, 15570, 1078.6689, 2.695634  
45739, 14848, 1078.6069, 2.695480  
45740, 14292, 1078.5450, 2.695325  
45741, 14126, 1078.4831, 2.695170  
45742, 14158, 1078.4212, 2.695015  
45743, 14020, 1078.3592, 2.694861  
45744, 13608, 1078.2973, 2.694706  
45745, 13226, 1078.2354, 2.694551  
45746, 13244, 1078.1735, 2.694396  
45747, 13702, 1078.1115, 2.694242  
45748, 14212, 1078.0496, 2.694087  
45749, 14370, 1077.9877, 2.693932  
45750, 14108, 1077.9257, 2.693777  
45751, 13710, 1077.8638, 2.693623  
45752, 13472, 1077.8019, 2.693468  
45753, 13442, 1077.7400, 2.693313  
45754, 13468, 1077.6780, 2.693158  
45755, 13460, 1077.6161, 2.693003  
45756, 13474, 1077.5542, 2.692849  
45757, 13580, 1077.4923, 2.692694  
45758, 13676, 1077.4303, 2.692539  
45759, 13610, 1077.3684, 2.692384  
45760, 13390, 1077.3065, 2.692230  
45761, 13238, 1077.2446, 2.692075  
45762, 13344, 1077.1826, 2.691920  
45763, 13616, 1077.1207, 2.691765  
45764, 13770, 1077.0588, 2.691611  
45765, 13688, 1076.9968, 2.691456  
45766, 13668, 1076.9349, 2.691301  
45767, 14154, 1076.8730, 2.691146  
45768, 15252, 1076.8111, 2.690992  
45769, 16528, 1076.7491, 2.690837  
45770, 17364, 1076.6872, 2.690682  
45771, 17502, 1076.6253, 2.690527  
45772, 17228, 1076.5634, 2.690373  
45773, 16952, 1076.5014, 2.690218  
45774, 16756, 1076.4395, 2.690063  
45775, 16372, 1076.3776, 2.689908  
45776, 15604, 1076.3156, 2.689754  
45777, 14694, 1076.2537, 2.689599  
45778, 14140, 1076.1918, 2.689444  
45779, 14162, 1076.1299, 2.689289  
45780, 14444, 1076.0679, 2.689135  
45781, 14472, 1076.0060, 2.688980  
45782, 14074, 1075.9441, 2.688825  
45783, 13648, 1075.8822, 2.688670  
45784, 13732, 1075.8202, 2.688516  
45785, 14458, 1075.7583, 2.688361  
45786, 15440, 1075.6964, 2.688206

45787, 16170, 1075.6345, 2.688051  
45788, 16446, 1075.5725, 2.687896  
45789, 16368, 1075.5106, 2.687742  
45790, 16080, 1075.4487, 2.687587  
45791, 15576, 1075.3867, 2.687432  
45792, 14852, 1075.3248, 2.687277  
45793, 14112, 1075.2629, 2.687123  
45794, 13676, 1075.2010, 2.686968  
45795, 13602, 1075.1390, 2.686813  
45796, 13554, 1075.0771, 2.686658  
45797, 13084, 1075.0152, 2.686504  
45798, 12148, 1074.9533, 2.686349  
45799, 11206, 1074.8913, 2.686194  
45800, 10762, 1074.8294, 2.686039  
45801, 10836, 1074.7675, 2.685885  
45802, 10950, 1074.7055, 2.685730  
45803, 10696, 1074.6436, 2.685575  
45804, 10224, 1074.5817, 2.685420  
45805, 10160, 1074.5198, 2.685266  
45806, 10930, 1074.4578, 2.685111  
45807, 12282, 1074.3959, 2.684956  
45808, 13492, 1074.3340, 2.684801  
45809, 14010, 1074.2721, 2.684647  
45810, 13888, 1074.2101, 2.684492  
45811, 13592, 1074.1482, 2.684337  
45812, 13484, 1074.0863, 2.684182  
45813, 13556, 1074.0244, 2.684028  
45814, 13668, 1073.9624, 2.683873  
45815, 13840, 1073.9005, 2.683718  
45816, 14224, 1073.8386, 2.683563  
45817, 14806, 1073.7766, 2.683409  
45818, 15280, 1073.7147, 2.683254  
45819, 15332, 1073.6528, 2.683099  
45820, 15036, 1073.5909, 2.682944  
45821, 14832, 1073.5289, 2.682789  
45822, 15080, 1073.4670, 2.682635  
45823, 15618, 1073.4051, 2.682480  
45824, 15916, 1073.3432, 2.682325  
45825, 15624, 1073.2812, 2.682170  
45826, 14964, 1073.2193, 2.682016  
45827, 14512, 1073.1574, 2.681861  
45828, 14616, 1073.0955, 2.681706  
45829, 15082, 1073.0335, 2.681551  
45830, 15418, 1072.9716, 2.681397  
45831, 15400, 1072.9097, 2.681242  
45832, 15198, 1072.8477, 2.681087  
45833, 15098, 1072.7858, 2.680932  
45834, 15112, 1072.7239, 2.680778  
45835, 14984, 1072.6620, 2.680623  
45836, 14564, 1072.6000, 2.680468  
45837, 14066, 1072.5381, 2.680313  
45838, 13852, 1072.4762, 2.680159  
45839, 14002, 1072.4143, 2.680004  
45840, 14202, 1072.3523, 2.679849  
45841, 14044, 1072.2904, 2.679694  
45842, 13474, 1072.2285, 2.679540  
45843, 12846, 1072.1665, 2.679385  
45844, 12542, 1072.1046, 2.679230  
45845, 12630, 1072.0427, 2.679075  
45846, 12890, 1071.9808, 2.678921  
45847, 13132, 1071.9188, 2.678766  
45848, 13382, 1071.8569, 2.678611  
45849, 13760, 1071.7950, 2.678456  
45850, 14212, 1071.7331, 2.678301  
45851, 14512, 1071.6711, 2.678147  
45852, 14560, 1071.6092, 2.677992  
45853, 14526, 1071.5473, 2.677837  
45854, 14722, 1071.4854, 2.677682  
45855, 15232, 1071.4234, 2.677528  
45856, 15800, 1071.3615, 2.677373  
45857, 16104, 1071.2996, 2.677218  
45858, 16094, 1071.2376, 2.677063  
45859, 15990, 1071.1757, 2.676909  
45860, 15952, 1071.1138, 2.676754  
45861, 15782, 1071.0519, 2.676599  
45862, 15140, 1070.9899, 2.676444  
45863, 13980, 1070.9280, 2.676290  
45864, 12728, 1070.8661, 2.676135  
45865, 11996, 1070.8042, 2.675980  
45866, 12032, 1070.7422, 2.675825  
45867, 12558, 1070.6803, 2.675671  
45868, 13102, 1070.6184, 2.675516  
45869, 13488, 1070.5564, 2.675361  
45870, 13898, 1070.4945, 2.675206  
45871, 14538, 1070.4326, 2.675052  
45872, 15284, 1070.3707, 2.674897  
45873, 15748, 1070.3087, 2.674742  
45874, 15640, 1070.2468, 2.674587  
45875, 15040, 1070.1849, 2.674433  
45876, 14264, 1070.1230, 2.674278  
45877, 13564, 1070.0610, 2.674123  
45878, 13000, 1069.9991, 2.673968  
45879, 12602, 1069.9372, 2.673814  
45880, 12496, 1069.8753, 2.673659  
45881, 12796, 1069.8133, 2.673504  
45882, 13374, 1069.7514, 2.673349  
45883, 13862, 1069.6895, 2.673194  
45884, 13958, 1069.6275, 2.673040  
45885, 13748, 1069.5656, 2.672885  
45886, 13620, 1069.5037, 2.672730  
45887, 13862, 1069.4418, 2.672575  
45888, 14368, 1069.3798, 2.672421  
45889, 14738, 1069.3179, 2.672266  
45890, 14744, 1069.2560, 2.672111  
45891, 14554, 1069.1941, 2.671956  
45892, 14468, 1069.1321, 2.671802  
45893, 14566, 1069.0702, 2.671647  
45894, 14594, 1069.0083, 2.671492  
45895, 14352, 1068.9464, 2.671337  
45896, 14016, 1068.8844, 2.671183  
45897, 14030, 1068.8225, 2.671028  
45898, 14650, 1068.7606, 2.670873  
45899, 15602, 1068.6986, 2.670718  
45900, 16306, 1068.6367, 2.670564  
45901, 16398, 1068.5748, 2.670409  
45902, 16040, 1068.5129, 2.670254  
45903, 15680, 1068.4509, 2.670099  
45904, 15602, 1068.3890, 2.669945  
45905, 15710, 1068.3271, 2.669790  
45906, 15756, 1068.2652, 2.669635  
45907, 15622, 1068.2032, 2.669480  
45908, 15380, 1068.1413, 2.669326  
45909, 15038, 1068.0794, 2.669171  
45910, 14470, 1068.0174, 2.669016  
45911, 13600, 1067.9555, 2.668861  
45912, 12658, 1067.8936, 2.668707  
45913, 12098, 1067.8317, 2.668552  
45914, 12198, 1067.7697, 2.668397  
45915, 12752, 1067.7078, 2.668242  
45916, 13270, 1067.6459, 2.668087  
45917, 13462, 1067.5840, 2.667933  
45918, 13524, 1067.5220, 2.667778  
45919, 13866, 1067.4601, 2.667623  
45920, 14630, 1067.3982, 2.667468  
45921, 15474, 1067.3362, 2.667314  
45922, 15928, 1067.2743, 2.667159  
45923, 15850, 1067.2124, 2.667004  
45924, 15526, 1067.1505, 2.666849  
45925, 15300, 1067.0885, 2.666695  
45926, 15222, 1067.0266, 2.666540  
45927, 15084, 1066.9647, 2.666385  
45928, 14794, 1066.9028, 2.666230  
45929, 14546, 1066.8408, 2.666076  
45930, 14612, 1066.7789, 2.665921  
45931, 14988, 1066.7170, 2.665766  
45932, 15356, 1066.6551, 2.665611  
45933, 15430, 1066.5931, 2.665457  
45934, 15286, 1066.5312, 2.665302  
45935, 15266, 1066.4693, 2.665147  
45936, 15564, 1066.4073, 2.664992  
45937, 15998, 1066.3454, 2.664838  
45938, 16216, 1066.2835, 2.664683  
45939, 16132, 1066.2216, 2.664528  
45940, 16046, 1066.1596, 2.664373  
45941, 16346, 1066.0977, 2.664219  
45942, 17058, 1066.0358, 2.664064  
45943, 17824, 1065.9739, 2.663909  
45944, 18280, 1065.9119, 2.663754  
45945, 18378, 1065.8500, 2.663600  
45946, 18360, 1065.7881, 2.663445  
45947, 18408, 1065.7261, 2.663290  
45948, 18462, 1065.6642, 2.663135  
45949, 18372, 1065.6023, 2.662980  
45950, 18144, 1065.5404, 2.662826  
45951, 17946, 1065.4784, 2.662671  
45952, 17834, 1065.4165, 2.662516  
45953, 17632, 1065.3546, 2.662361  
45954, 17132, 1065.2927, 2.662207  
45955, 16428, 1065.2307, 2.662052  
45956, 15928, 1065.1688, 2.661897  
45957, 15928, 1065.1069, 2.661742  
45958, 16214, 1065.0450, 2.661588  
45959, 16198, 1064.9830, 2.661433  
45960, 15514, 1064.9211, 2.661278  
45961, 14452, 1064.8592, 2.661123  
45962, 13706, 1064.7972, 2.660969  
45963, 13690, 1064.7353, 2.660814  
45964, 14134, 1064.6734, 2.660659  
45965, 14394, 1064.6115, 2.660504  
45966, 14166, 1064.5495, 2.660350  
45967, 13780, 1064.4876, 2.660195  
45968, 13796, 1064.4257, 2.660040  
45969, 14376, 1064.3638, 2.659885  
45970, 15094, 1064.3018, 2.659731  
45971, 15446, 1064.2399, 2.659576  
45972, 15382, 1064.1780, 2.659421  
45973, 15330, 1064.1160, 2.659266  
45974, 15628, 1064.0541, 2.659112  
45975, 16126, 1063.9922, 2.658957  
45976, 16314, 1063.9303, 2.658802  
45977, 15890, 1063.8683, 2.658647  
45978, 15078, 1063.8064, 2.658493  
45979, 14370, 1063.7445, 2.658338  
45980, 14046, 1063.6826, 2.658183  
45981, 13976, 1063.6206, 2.658028  
45982, 13958, 1063.5587, 2.657873  
45983, 14044, 1063.4968, 2.657719  
45984, 14536, 1063.4349, 2.657564  
45985, 15550, 1063.3729, 2.657409  
45986, 16764, 1063.3110, 2.657254  
45987, 17608, 1063.2491, 2.657100  
45988, 17714, 1063.1871, 2.656945  
45989, 17186, 1063.1252, 2.656790  
45990, 16424, 1063.0633, 2.656635  
45991, 15756, 1063.0014, 2.656481  
45992, 15314, 1062.9394, 2.656326  
45993, 15142, 1062.8775, 2.656171  
45994, 15304, 1062.8156, 2.656016  
45995, 15794, 1062.7537, 2.655862  
45996, 16380, 1062.6917, 2.655707  
45997, 16702, 1062.6298, 2.655552  
45998, 16574, 1062.5679, 2.655397  
45999, 16246, 1062.5059, 2.655243  
46000, 16178, 1062.4440, 2.655088  
46001, 16596, 1062.3821, 2.654933  
46002, 17260, 1062.3202, 2.654778  
46003, 17712, 1062.2582, 2.654624  
46004, 17752, 1062.1963, 2.654469  
46005, 17628, 1062.1344, 2.654314  
46006, 17666, 1062.0725, 2.654159  
46007, 17876, 1062.0105, 2.654005  
46008, 17904, 1061.9486, 2.653850  
46009, 17444, 1061.8867, 2.653695  
46010, 16630, 1061.8248, 2.653540  
46011, 15928, 1061.7628, 2.653386  
46012, 15660, 1061.7009, 2.653231  
46013, 15646, 1061.6390, 2.653076  
46014, 15456, 1061.5770, 2.652921

46015, 14870, 1061.5151, 2.652766  
46016, 14160, 1061.4532, 2.652612  
46017, 13792, 1061.3913, 2.652457  
46018, 13944, 1061.3293, 2.652302  
46019, 14350, 1061.2674, 2.652147  
46020, 14594, 1061.2055, 2.651993  
46021, 14510, 1061.1436, 2.651838  
46022, 14304, 1061.0816, 2.651683  
46023, 14248, 1061.0197, 2.651528  
46024, 14402, 1060.9578, 2.651374  
46025, 14570, 1060.8958, 2.651219  
46026, 14572, 1060.8339, 2.651064  
46027, 14420, 1060.7720, 2.650909  
46028, 14280, 1060.7101, 2.650755  
46029, 14280, 1060.6481, 2.650600  
46030, 14394, 1060.5862, 2.650445  
46031, 14506, 1060.5243, 2.650290  
46032, 14514, 1060.4624, 2.650136  
46033, 14364, 1060.4004, 2.649981  
46034, 14102, 1060.3385, 2.649826  
46035, 13844, 1060.2766, 2.649671  
46036, 13794, 1060.2147, 2.649517  
46037, 14130, 1060.1527, 2.649362  
46038, 14808, 1060.0908, 2.649207  
46039, 15518, 1060.0289, 2.649052  
46040, 15906, 1059.9669, 2.648898  
46041, 15904, 1059.9050, 2.648743  
46042, 15814, 1059.8431, 2.648588  
46043, 16032, 1059.7812, 2.648433  
46044, 16590, 1059.7192, 2.648279  
46045, 17068, 1059.6573, 2.648124  
46046, 16938, 1059.5954, 2.647969  
46047, 16068, 1059.5335, 2.647814  
46048, 14878, 1059.4715, 2.647659  
46049, 13954, 1059.4096, 2.647505  
46050, 13564, 1059.3477, 2.647350  
46051, 13558, 1059.2858, 2.647195  
46052, 13648, 1059.2238, 2.647040  
46053, 13766, 1059.1619, 2.646886  
46054, 14036, 1059.1000, 2.646731  
46055, 14522, 1059.0380, 2.646576  
46056, 15020, 1058.9761, 2.646421  
46057, 15236, 1058.9142, 2.646267  
46058, 15080, 1058.8523, 2.646112  
46059, 14760, 1058.7903, 2.645957  
46060, 14558, 1058.7284, 2.645802  
46061, 14568, 1058.6665, 2.645648  
46062, 14698, 1058.6046, 2.645493  
46063, 14892, 1058.5426, 2.645338  
46064, 15238, 1058.4807, 2.645183  
46065, 15830, 1058.4188, 2.645029  
46066, 16528, 1058.3568, 2.644874  
46067, 16994, 1058.2949, 2.644719  
46068, 16994, 1058.2330, 2.644564  
46069, 16618, 1058.1711, 2.644410  
46070, 16160, 1058.1091, 2.644255  
46071, 15788, 1058.0472, 2.644100  
46072, 15406, 1057.9853, 2.643945  
46073, 14884, 1057.9234, 2.643791  
46074, 14388, 1057.8614, 2.643636  
46075, 14320, 1057.7995, 2.643481  
46076, 14898, 1057.7376, 2.643326  
46077, 15828, 1057.6757, 2.643172  
46078, 16476, 1057.6137, 2.643017  
46079, 16422, 1057.5518, 2.642862  
46080, 15826, 1057.4899, 2.642707  
46081, 15200, 1057.4279, 2.642552  
46082, 14878, 1057.3660, 2.642398  
46083, 14746, 1057.3041, 2.642243  
46084, 14544, 1057.2422, 2.642088  
46085, 14300, 1057.1802, 2.641933  
46086, 14356, 1057.1183, 2.641779  
46087, 14910, 1057.0564, 2.641624  
46088, 15662, 1056.9945, 2.641469  
46089, 16018, 1056.9325, 2.641314  
46090, 15692, 1056.8706, 2.641160

46091, 15032, 1056.8087, 2.641005  
46092, 14658, 1056.7467, 2.640850  
46093, 14786, 1056.6848, 2.640695  
46094, 14986, 1056.6229, 2.640541  
46095, 14696, 1056.5610, 2.640386  
46096, 13880, 1056.4990, 2.640231  
46097, 13136, 1056.4371, 2.640076  
46098, 13104, 1056.3752, 2.639922  
46099, 13780, 1056.3133, 2.639767  
46100, 14532, 1056.2513, 2.639612  
46101, 14728, 1056.1894, 2.639457  
46102, 14314, 1056.1275, 2.639303  
46103, 13758, 1056.0656, 2.639148  
46104, 13470, 1056.0036, 2.638993  
46105, 13450, 1055.9417, 2.638838  
46106, 13454, 1055.8798, 2.638684  
46107, 13432, 1055.8178, 2.638529  
46108, 13650, 1055.7559, 2.638374  
46109, 14368, 1055.6940, 2.638219  
46110, 15444, 1055.6321, 2.638065  
46111, 16408, 1055.5701, 2.637910  
46112, 16914, 1055.5082, 2.637755  
46113, 17034, 1055.4463, 2.637600  
46114, 17060, 1055.3844, 2.637445  
46115, 17110, 1055.3224, 2.637291  
46116, 16964, 1055.2605, 2.637136  
46117, 16368, 1055.1986, 2.636981  
46118, 15406, 1055.1366, 2.636826  
46119, 14488, 1055.0747, 2.636672  
46120, 13956, 1055.0128, 2.636517  
46121, 13794, 1054.9509, 2.636362  
46122, 13720, 1054.8889, 2.636207  
46123, 13542, 1054.8270, 2.636053  
46124, 13346, 1054.7651, 2.635898  
46125, 13284, 1054.7032, 2.635743  
46126, 13316, 1054.6412, 2.635588  
46127, 13262, 1054.5793, 2.635434  
46128, 13110, 1054.5174, 2.635279  
46129, 13138, 1054.4555, 2.635124  
46130, 13662, 1054.3935, 2.634969  
46131, 14600, 1054.3316, 2.634815  
46132, 15452, 1054.2697, 2.634660  
46133, 15728, 1054.2077, 2.634505  
46134, 15476, 1054.1458, 2.634350  
46135, 15214, 1054.0839, 2.634196  
46136, 15422, 1054.0220, 2.634041  
46137, 16056, 1053.9600, 2.633886  
46138, 16622, 1053.8981, 2.633731  
46139, 16720, 1053.8362, 2.633577  
46140, 16386, 1053.7743, 2.633422  
46141, 15886, 1053.7123, 2.633267  
46142, 15328, 1053.6504, 2.633112  
46143, 14534, 1053.5885, 2.632957  
46144, 13422, 1053.5265, 2.632803  
46145, 12340, 1053.4646, 2.632648  
46146, 11890, 1053.4027, 2.632493  
46147, 12370, 1053.3408, 2.632338  
46148, 13400, 1053.2788, 2.632184  
46149, 14258, 1053.2169, 2.632029  
46150, 14548, 1053.1550, 2.631874  
46151, 14534, 1053.0931, 2.631719  
46152, 14746, 1053.0311, 2.631565  
46153, 15338, 1052.9692, 2.631410  
46154, 15920, 1052.9073, 2.631255  
46155, 15994, 1052.8454, 2.631100  
46156, 15532, 1052.7834, 2.630946  
46157, 15026, 1052.7215, 2.630791  
46158, 14918, 1052.6596, 2.630636  
46159, 15164, 1052.5976, 2.630481  
46160, 15302, 1052.5357, 2.630327  
46161, 15032, 1052.4738, 2.630172  
46162, 14544, 1052.4119, 2.630017  
46163, 14274, 1052.3499, 2.629862  
46164, 14410, 1052.2880, 2.629708  
46165, 14638, 1052.2261, 2.629553  
46166, 14474, 1052.1642, 2.629398

46167, 13736, 1052.1022, 2.629243  
46168, 12690, 1052.0403, 2.629089  
46169, 11762, 1051.9784, 2.628934  
46170, 11198, 1051.9164, 2.628779  
46171, 10996, 1051.8545, 2.628624  
46172, 11096, 1051.7926, 2.628470  
46173, 11480, 1051.7307, 2.628315  
46174, 12112, 1051.6687, 2.628160  
46175, 12818, 1051.6068, 2.628005  
46176, 13424, 1051.5449, 2.627850  
46177, 13918, 1051.4830, 2.627696  
46178, 14468, 1051.4210, 2.627541  
46179, 15178, 1051.3591, 2.627386  
46180, 15836, 1051.2972, 2.627231  
46181, 16076, 1051.2353, 2.627077  
46182, 15758, 1051.1733, 2.626922  
46183, 15230, 1051.1114, 2.626767  
46184, 15048, 1051.0495, 2.626612  
46185, 15430, 1050.9875, 2.626458  
46186, 16022, 1050.9256, 2.626303  
46187, 16196, 1050.8637, 2.626148  
46188, 15662, 1050.8018, 2.625993  
46189, 14674, 1050.7398, 2.625839  
46190, 13738, 1050.6779, 2.625684  
46191, 13110, 1050.6160, 2.625529  
46192, 12678, 1050.5541, 2.625374  
46193, 12226, 1050.4921, 2.625220  
46194, 11766, 1050.4302, 2.625065  
46195, 11494, 1050.3683, 2.624910  
46196, 11474, 1050.3063, 2.624755  
46197, 11548, 1050.2444, 2.624601  
46198, 11538, 1050.1825, 2.624446  
46199, 11546, 1050.1206, 2.624291  
46200, 11884, 1050.0586, 2.624136  
46201, 12682, 1049.9967, 2.623982  
46202, 13668, 1049.9348, 2.623827  
46203, 14394, 1049.8729, 2.623672  
46204, 14714, 1049.8109, 2.623517  
46205, 14962, 1049.7490, 2.623363  
46206, 15538, 1049.6871, 2.623208  
46207, 16404, 1049.6252, 2.623053  
46208, 16996, 1049.5632, 2.622898  
46209, 16774, 1049.5013, 2.622743  
46210, 15778, 1049.4394, 2.622589  
46211, 14628, 1049.3774, 2.622434  
46212, 13938, 1049.3155, 2.622279  
46213, 13804, 1049.2536, 2.622124  
46214, 13904, 1049.1917, 2.621970  
46215, 14004, 1049.1297, 2.621815  
46216, 14272, 1049.0678, 2.621660  
46217, 15004, 1049.0059, 2.621505  
46218, 16094, 1048.9440, 2.621351  
46219, 16940, 1048.8820, 2.621196  
46220, 16904, 1048.8201, 2.621041  
46221, 15944, 1048.7582, 2.620886  
46222, 14668, 1048.6962, 2.620732  
46223, 13796, 1048.6343, 2.620577  
46224, 13600, 1048.5724, 2.620422  
46225, 13806, 1048.5105, 2.620267  
46226, 14034, 1048.4485, 2.620113  
46227, 14186, 1048.3866, 2.619958  
46228, 14412, 1048.3247, 2.619803  
46229, 14808, 1048.2628, 2.619648  
46230, 15218, 1048.2008, 2.619494  
46231, 15420, 1048.1389, 2.619339  
46232, 15402, 1048.0770, 2.619184  
46233, 15404, 1048.0151, 2.619029  
46234, 15620, 1047.9531, 2.618875  
46235, 15996, 1047.8912, 2.618720  
46236, 16254, 1047.8293, 2.618565  
46237, 16166, 1047.7673, 2.618410  
46238, 15712, 1047.7054, 2.618256  
46239, 15054, 1047.6435, 2.618101  
46240, 14370, 1047.5816, 2.617946  
46241, 13788, 1047.5196, 2.617791  
46242, 13442, 1047.4577, 2.617636



46243, 13414, 1047.3958, 2.617482  
46244, 13656, 1047.3339, 2.617327  
46245, 13924, 1047.2719, 2.617172  
46246, 13954, 1047.2100, 2.617017  
46247, 13730, 1047.1481, 2.616863  
46248, 13516, 1047.0861, 2.616708  
46249, 13584, 1047.0242, 2.616553  
46250, 13914, 1046.9623, 2.616398  
46251, 14210, 1046.9004, 2.616244  
46252, 14276, 1046.8384, 2.616089  
46253, 14296, 1046.7765, 2.615934  
46254, 14672, 1046.7146, 2.615779  
46255, 15542, 1046.6527, 2.615625  
46256, 16506, 1046.5907, 2.615470  
46257, 16942, 1046.5288, 2.615315  
46258, 16610, 1046.4669, 2.615160  
46259, 15908, 1046.4050, 2.615006  
46260, 15494, 1046.3430, 2.614851  
46261, 15682, 1046.2811, 2.614696  
46262, 16220, 1046.2192, 2.614541  
46263, 16680, 1046.1572, 2.614387  
46264, 16956, 1046.0953, 2.614232  
46265, 17254, 1046.0334, 2.614077  
46266, 17670, 1045.9715, 2.613922  
46267, 17844, 1045.9095, 2.613768  
46268, 17240, 1045.8476, 2.613613  
46269, 15740, 1045.7857, 2.613458  
46270, 13902, 1045.7238, 2.613303  
46271, 12564, 1045.6618, 2.613149  
46272, 12138, 1045.5999, 2.612994  
46273, 12332, 1045.5380, 2.612839  
46274, 12600, 1045.4761, 2.612684  
46275, 12678, 1045.4141, 2.612529  
46276, 12768, 1045.3522, 2.612375  
46277, 13084, 1045.2903, 2.612220  
46278, 13468, 1045.2283, 2.612065  
46279, 13496, 1045.1664, 2.611910  
46280, 12964, 1045.1045, 2.611756  
46281, 12214, 1045.0426, 2.611601  
46282, 11842, 1044.9806, 2.611446  
46283, 12158, 1044.9187, 2.611291  
46284, 12920, 1044.8568, 2.611137  
46285, 13642, 1044.7949, 2.610982  
46286, 14074, 1044.7329, 2.610827  
46287, 14330, 1044.6710, 2.610672  
46288, 14604, 1044.6091, 2.610518  
46289, 14866, 1044.5471, 2.610363  
46290, 14890, 1044.4852, 2.610208  
46291, 14608, 1044.4233, 2.610053  
46292, 14266, 1044.3614, 2.609899  
46293, 14192, 1044.2994, 2.609744  
46294, 14486, 1044.2375, 2.609589  
46295, 14888, 1044.1756, 2.609434  
46296, 15068, 1044.1137, 2.609280  
46297, 14926, 1044.0517, 2.609125  
46298, 14624, 1043.9898, 2.608970  
46299, 14326, 1043.9279, 2.608815  
46300, 14040, 1043.8660, 2.608661  
46301, 13692, 1043.8040, 2.608506  
46302, 13294, 1043.7421, 2.608351  
46303, 12962, 1043.6802, 2.608196  
46304, 12758, 1043.6182, 2.608042  
46305, 12578, 1043.5563, 2.607887  
46306, 12322, 1043.4944, 2.607732  
46307, 12088, 1043.4325, 2.607577  
46308, 12170, 1043.3705, 2.607422  
46309, 12712, 1043.3086, 2.607268  
46310, 13476, 1043.2467, 2.607113  
46311, 13940, 1043.1848, 2.606958  
46312, 13768, 1043.1228, 2.606803  
46313, 13100, 1043.0609, 2.606649  
46314, 12390, 1042.9990, 2.606494  
46315, 11930, 1042.9370, 2.606339  
46316, 11590, 1042.8751, 2.606184  
46317, 11056, 1042.8132, 2.606030  
46318, 10276, 1042.7513, 2.605875  
46319, 9588, 1042.6893, 2.605720  
46320, 9400, 1042.6274, 2.605565  
46321, 9796, 1042.5655, 2.605411  
46322, 10460, 1042.5036, 2.605256  
46323, 11036, 1042.4416, 2.605101  
46324, 11450, 1042.3797, 2.604946  
46325, 11886, 1042.3178, 2.604792  
46326, 12474, 1042.2559, 2.604637  
46327, 13106, 1042.1939, 2.604482  
46328, 13592, 1042.1320, 2.604327  
46329, 13882, 1042.0701, 2.604173  
46330, 14120, 1042.0081, 2.604018  
46331, 14394, 1041.9462, 2.603863  
46332, 14574, 1041.8843, 2.603708  
46333, 14446, 1041.8224, 2.603554  
46334, 14016, 1041.7604, 2.603399  
46335, 13578, 1041.6985, 2.603244  
46336, 13438, 1041.6366, 2.603089  
46337, 13592, 1041.5747, 2.602935  
46338, 13720, 1041.5127, 2.602780  
46339, 13528, 1041.4508, 2.602625  
46340, 13056, 1041.3889, 2.602470  
46341, 12576, 1041.3269, 2.602315  
46342, 12254, 1041.2650, 2.602161  
46343, 11982, 1041.2031, 2.602006  
46344, 11596, 1041.1412, 2.601851  
46345, 11212, 1041.0792, 2.601696  
46346, 11208, 1041.0173, 2.601542  
46347, 11838, 1040.9554, 2.601387  
46348, 12898, 1040.8935, 2.601232  
46349, 13838, 1040.8315, 2.601077  
46350, 14276, 1040.7696, 2.600923  
46351, 14326, 1040.7077, 2.600768  
46352, 14444, 1040.6458, 2.600613  
46353, 14894, 1040.5838, 2.600458  
46354, 15490, 1040.5219, 2.600304  
46355, 15826, 1040.4600, 2.600149  
46356, 15706, 1040.3980, 2.599994  
46357, 15268, 1040.3361, 2.599839  
46358, 14752, 1040.2742, 2.599685  
46359, 14206, 1040.2123, 2.599530  
46360, 13556, 1040.1503, 2.599375  
46361, 12902, 1040.0884, 2.599220  
46362, 12608, 1040.0265, 2.599066  
46363, 13038, 1039.9646, 2.598911  
46364, 14114, 1039.9026, 2.598756  
46365, 15304, 1039.8407, 2.598601  
46366, 16014, 1039.7788, 2.598447  
46367, 16062, 1039.7168, 2.598292  
46368, 15688, 1039.6549, 2.598137  
46369, 15236, 1039.5930, 2.597982  
46370, 14786, 1039.5311, 2.597828  
46371, 14240, 1039.4691, 2.597673  
46372, 13626, 1039.4072, 2.597518  
46373, 13158, 1039.3453, 2.597363  
46374, 13020, 1039.2834, 2.597208  
46375, 13088, 1039.2214, 2.597054  
46376, 13046, 1039.1595, 2.596899  
46377, 12736, 1039.0976, 2.596744  
46378, 12410, 1039.0357, 2.596589  
46379, 12468, 1038.9737, 2.596435  
46380, 12996, 1038.9118, 2.596280  
46381, 13652, 1038.8499, 2.596125  
46382, 14008, 1038.7879, 2.595970  
46383, 14072, 1038.7260, 2.595816  
46384, 14264, 1038.6641, 2.595661  
46385, 14924, 1038.6022, 2.595506  
46386, 15904, 1038.5402, 2.595351  
46387, 16644, 1038.4783, 2.595197  
46388, 16758, 1038.4164, 2.595042  
46389, 16432, 1038.3545, 2.594887  
46390, 16190, 1038.2925, 2.594732  
46391, 16302, 1038.2306, 2.594578  
46392, 16502, 1038.1687, 2.594423  
46393, 16288, 1038.1067, 2.594268  
46394, 15502, 1038.0448, 2.594113  
46395, 14510, 1037.9829, 2.593959  
46396, 13820, 1037.9210, 2.593804  
46397, 13598, 1037.8590, 2.593649  
46398, 13588, 1037.7971, 2.593494  
46399, 13454, 1037.7352, 2.593340  
46400, 13158, 1037.6733, 2.593185  
46401, 12906, 1037.6113, 2.593030  
46402, 12878, 1037.5494, 2.592875  
46403, 13046, 1037.4875, 2.592721  
46404, 13316, 1037.4256, 2.592566  
46405, 13712, 1037.3636, 2.592411  
46406, 14352, 1037.3017, 2.592256  
46407, 15170, 1037.2398, 2.592101  
46408, 15844, 1037.1778, 2.591947  
46409, 16042, 1037.1159, 2.591792  
46410, 15758, 1037.0540, 2.591637  
46411, 15318, 1036.9921, 2.591482  
46412, 15028, 1036.9301, 2.591328  
46413, 14834, 1036.8682, 2.591173  
46414, 14450, 1036.8063, 2.591018  
46415, 13794, 1036.7444, 2.590863  
46416, 13234, 1036.6824, 2.590709  
46417, 13260, 1036.6205, 2.590554  
46418, 13952, 1036.5586, 2.590399  
46419, 14772, 1036.4966, 2.590244  
46420, 15032, 1036.4347, 2.590090  
46421, 14536, 1036.3728, 2.589935  
46422, 13770, 1036.3109, 2.589780  
46423, 13404, 1036.2489, 2.589625  
46424, 13712, 1036.1870, 2.589471  
46425, 14406, 1036.1251, 2.589316  
46426, 15046, 1036.0632, 2.589161  
46427, 15492, 1036.0012, 2.589006  
46428, 15908, 1035.9393, 2.588852  
46429, 16422, 1035.8774, 2.588697  
46430, 16866, 1035.8155, 2.588542  
46431, 16956, 1035.7535, 2.588387  
46432, 16612, 1035.6916, 2.588233  
46433, 16038, 1035.6297, 2.588078  
46434, 15478, 1035.5677, 2.587923  
46435, 14922, 1035.5058, 2.587768  
46436, 14216, 1035.4439, 2.587613  
46437, 13350, 1035.3820, 2.587459  
46438, 12608, 1035.3200, 2.587304  
46439, 12342, 1035.2581, 2.587149  
46440, 12592, 1035.1962, 2.586994  
46441, 13030, 1035.1343, 2.586840  
46442, 13296, 1035.0723, 2.586685  
46443, 13402, 1035.0104, 2.586530  
46444, 13640, 1034.9485, 2.586375  
46445, 14234, 1034.8865, 2.586221  
46446, 15010, 1034.8246, 2.586066  
46447, 15540, 1034.7627, 2.585911  
46448, 15560, 1034.7008, 2.585756  
46449, 15196, 1034.6388, 2.585602  
46450, 14790, 1034.5769, 2.585447  
46451, 14544, 1034.5150, 2.585292  
46452, 14412, 1034.4531, 2.585137  
46453, 14286, 1034.3911, 2.584983  
46454, 14208, 1034.3292, 2.584828  
46455, 14332, 1034.2673, 2.584673  
46456, 14662, 1034.2054, 2.584518  
46457, 14996, 1034.1434, 2.584364  
46458, 15114, 1034.0815, 2.584209  
46459, 15084, 1034.0196, 2.584054  
46460, 15166, 1033.9576, 2.583899  
46461, 15518, 1033.8957, 2.583745  
46462, 15918, 1033.8338, 2.583590  
46463, 15924, 1033.7719, 2.583435  
46464, 15344, 1033.7099, 2.583280  
46465, 14478, 1033.6480, 2.583126  
46466, 13926, 1033.5861, 2.582971  
46467, 14054, 1033.5242, 2.582816  
46468, 14744, 1033.4622, 2.582661  
46469, 15516, 1033.4003, 2.582506  
46470, 15950, 1033.3384, 2.582352

46471, 15910, 1033.2765, 2.582197  
46472, 15464, 1033.2145, 2.582042  
46473, 14734, 1033.1526, 2.581887  
46474, 13890, 1033.0907, 2.581733  
46475, 13194, 1033.0287, 2.581578  
46476, 12938, 1032.9668, 2.581423  
46477, 13198, 1032.9049, 2.581268  
46478, 13700, 1032.8430, 2.581114  
46479, 13984, 1032.7810, 2.580959  
46480, 13794, 1032.7191, 2.580804  
46481, 13314, 1032.6572, 2.580649  
46482, 12992, 1032.5953, 2.580495  
46483, 13096, 1032.5333, 2.580340  
46484, 13518, 1032.4714, 2.580185  
46485, 13910, 1032.4095, 2.580030  
46486, 14096, 1032.3475, 2.579876  
46487, 14166, 1032.2856, 2.579721  
46488, 14314, 1032.2237, 2.579566  
46489, 14574, 1032.1618, 2.579411  
46490, 14812, 1032.0998, 2.579257  
46491, 14904, 1032.0379, 2.579102  
46492, 14882, 1031.9760, 2.578947  
46493, 14846, 1031.9141, 2.578792  
46494, 14786, 1031.8521, 2.578638  
46495, 14600, 1031.7902, 2.578483  
46496, 14302, 1031.7283, 2.578328  
46497, 14146, 1031.6664, 2.578173  
46498, 14426, 1031.6044, 2.578019  
46499, 15172, 1031.5425, 2.577864  
46500, 16012, 1031.4806, 2.577709  
46501, 16478, 1031.4186, 2.577554  
46502, 16416, 1031.3567, 2.577399  
46503, 16116, 1031.2947, 2.577245  
46504, 15990, 1031.2329, 2.577090  
46505, 16224, 1031.1709, 2.576935  
46506, 16670, 1031.1090, 2.576780  
46507, 17102, 1031.0471, 2.576626  
46508, 17446, 1030.9852, 2.576471  
46509, 17702, 1030.9232, 2.576316  
46510, 17796, 1030.8613, 2.576161  
46511, 17494, 1030.7994, 2.576007  
46512, 16716, 1030.7374, 2.575852  
46513, 15728, 1030.6755, 2.575697  
46514, 15026, 1030.6136, 2.575542  
46515, 14908, 1030.5517, 2.575388  
46516, 15178, 1030.4897, 2.575233  
46517, 15352, 1030.4278, 2.575078  
46518, 15154, 1030.3659, 2.574923  
46519, 14744, 1030.3040, 2.574769  
46520, 14550, 1030.2420, 2.574614  
46521, 14740, 1030.1801, 2.574459  
46522, 15096, 1030.1182, 2.574304  
46523, 15252, 1030.0563, 2.574150  
46524, 15112, 1029.9943, 2.573995  
46525, 14928, 1029.9324, 2.573840  
46526, 14990, 1029.8705, 2.573685  
46527, 15316, 1029.8085, 2.573531  
46528, 15712, 1029.7466, 2.573376  
46529, 16054, 1029.6847, 2.573221  
46530, 16478, 1029.6228, 2.573066  
46531, 17172, 1029.5608, 2.572912  
46532, 18048, 1029.4989, 2.572757  
46533, 18674, 1029.4370, 2.572602  
46534, 18600, 1029.3751, 2.572447  
46535, 17742, 1029.3131, 2.572292  
46536, 16464, 1029.2512, 2.572138  
46537, 15298, 1029.1893, 2.571983  
46538, 14620, 1029.1273, 2.571828  
46539, 14518, 1029.0654, 2.571673  
46540, 14880, 1029.0035, 2.571519  
46541, 15488, 1028.9416, 2.571364  
46542, 16016, 1028.8796, 2.571209  
46543, 16086, 1028.8177, 2.571054  
46544, 15500, 1028.7558, 2.570900  
46545, 14446, 1028.6939, 2.570745  
46546, 13434, 1028.6319, 2.570590

46547, 12920, 1028.5700, 2.570435  
46548, 12946, 1028.5081, 2.570281  
46549, 13138, 1028.4462, 2.570126  
46550, 13124, 1028.3842, 2.569971  
46551, 12900, 1028.3223, 2.569816  
46552, 12814, 1028.2604, 2.569662  
46553, 13170, 1028.1984, 2.569507  
46554, 13908, 1028.1365, 2.569352  
46555, 14694, 1028.0746, 2.569197  
46556, 15252, 1028.0127, 2.569043  
46557, 15600, 1027.9507, 2.568888  
46558, 15902, 1027.8888, 2.568733  
46559, 16198, 1027.8269, 2.568578  
46560, 16354, 1027.7650, 2.568424  
46561, 16230, 1027.7030, 2.568269  
46562, 15918, 1027.6411, 2.568114  
46563, 15654, 1027.5792, 2.567959  
46564, 15588, 1027.5172, 2.567805  
46565, 15664, 1027.4553, 2.567650  
46566, 15756, 1027.3934, 2.567495  
46567, 15878, 1027.3315, 2.567340  
46568, 16154, 1027.2695, 2.567185  
46569, 16594, 1027.2076, 2.567031  
46570, 16936, 1027.1457, 2.566876  
46571, 16832, 1027.0838, 2.566721  
46572, 16154, 1027.0218, 2.566566  
46573, 15118, 1026.9599, 2.566412  
46574, 14024, 1026.8980, 2.566257  
46575, 12984, 1026.8361, 2.566102  
46576, 11906, 1026.7741, 2.565947  
46577, 10818, 1026.7122, 2.565793  
46578, 10058, 1026.6503, 2.565638  
46579, 10072, 1026.5883, 2.565483  
46580, 10954, 1026.5264, 2.565328  
46581, 12252, 1026.4645, 2.565174  
46582, 13342, 1026.4026, 2.565019  
46583, 13958, 1026.3406, 2.564864  
46584, 14362, 1026.2787, 2.564709  
46585, 14906, 1026.2168, 2.564555  
46586, 15582, 1026.1549, 2.564400  
46587, 15950, 1026.0929, 2.564245  
46588, 15676, 1026.0310, 2.564090  
46589, 14976, 1025.9691, 2.563936  
46590, 14472, 1025.9071, 2.563781  
46591, 14608, 1025.8452, 2.563626  
46592, 15198, 1025.7833, 2.563471  
46593, 15638, 1025.7214, 2.563317  
46594, 15564, 1025.6594, 2.563162  
46595, 15180, 1025.5975, 2.563007  
46596, 15032, 1025.5356, 2.562852  
46597, 15400, 1025.4737, 2.562698  
46598, 15998, 1025.4117, 2.562543  
46599, 16272, 1025.3498, 2.562388  
46600, 15934, 1025.2879, 2.562233  
46601, 15198, 1025.2260, 2.562078  
46602, 14522, 1025.1640, 2.561924  
46603, 14228, 1025.1021, 2.561769  
46604, 14354, 1025.0402, 2.561614  
46605, 14810, 1024.9782, 2.561459  
46606, 15522, 1024.9163, 2.561305  
46607, 16412, 1024.8544, 2.561150  
46608, 17282, 1024.7925, 2.560995  
46609, 17868, 1024.7305, 2.560840  
46610, 18038, 1024.6686, 2.560686  
46611, 17938, 1024.6067, 2.560531  
46612, 17874, 1024.5448, 2.560376  
46613, 18026, 1024.4828, 2.560221  
46614, 18296, 1024.4209, 2.560067  
46615, 18458, 1024.3590, 2.559912  
46616, 18382, 1024.2970, 2.559757  
46617, 18140, 1024.2351, 2.559602  
46618, 17876, 1024.1732, 2.559448  
46619, 17612, 1024.1113, 2.559293  
46620, 17258, 1024.0493, 2.559138  
46621, 16714, 1023.9874, 2.558983  
46622, 15954, 1023.9255, 2.558829

46623, 15028, 1023.8636, 2.558674  
46624, 14014, 1023.8016, 2.558519  
46625, 13080, 1023.7397, 2.558364  
46626, 12508, 1023.6778, 2.558210  
46627, 12606, 1023.6159, 2.558055  
46628, 13452, 1023.5539, 2.557900  
46629, 14726, 1023.4920, 2.557745  
46630, 15900, 1023.4301, 2.557591  
46631, 16622, 1023.3681, 2.557436  
46632, 16964, 1023.3062, 2.557281  
46633, 17218, 1023.2443, 2.557126  
46634, 17492, 1023.1824, 2.556971  
46635, 17528, 1023.1204, 2.556817  
46636, 16968, 1023.0585, 2.556662  
46637, 15810, 1022.9966, 2.556507  
46638, 14484, 1022.9347, 2.556352  
46639, 13544, 1022.8727, 2.556198  
46640, 13190, 1022.8108, 2.556043  
46641, 13208, 1022.7489, 2.555888  
46642, 13306, 1022.6869, 2.555733  
46643, 13426, 1022.6250, 2.555579  
46644, 13732, 1022.5631, 2.555424  
46645, 14266, 1022.5012, 2.555269  
46646, 14774, 1022.4392, 2.555114  
46647, 14934, 1022.3773, 2.554960  
46648, 14694, 1022.3154, 2.554805  
46649, 14342, 1022.2535, 2.554650  
46650, 14194, 1022.1915, 2.554495  
46651, 14242, 1022.1296, 2.554341  
46652, 14224, 1022.0677, 2.554186  
46653, 13996, 1022.0058, 2.554031  
46654, 13780, 1021.9438, 2.553876  
46655, 13962, 1021.8819, 2.553722  
46656, 14668, 1021.8200, 2.553567  
46657, 15584, 1021.7580, 2.553412  
46658, 16258, 1021.6961, 2.553257  
46659, 16564, 1021.6342, 2.553103  
46660, 16776, 1021.5723, 2.552948  
46661, 17236, 1021.5103, 2.552793  
46662, 17946, 1021.4484, 2.552638  
46663, 18602, 1021.3865, 2.552484  
46664, 18926, 1021.3246, 2.552329  
46665, 18986, 1021.2626, 2.552174  
46666, 19008, 1021.2007, 2.552019  
46667, 19088, 1021.1388, 2.551864  
46668, 19048, 1021.0768, 2.551710  
46669, 18692, 1021.0149, 2.551555  
46670, 18120, 1020.9530, 2.551400  
46671, 17668, 1020.8911, 2.551245  
46672, 17562, 1020.8291, 2.551091  
46673, 17686, 1020.7672, 2.550936  
46674, 17714, 1020.7053, 2.550781  
46675, 17508, 1020.6434, 2.550626  
46676, 17258, 1020.5814, 2.550472  
46677, 17188, 1020.5195, 2.550317  
46678, 17228, 1020.4576, 2.550162  
46679, 17030, 1020.3957, 2.550007  
46680, 16360, 1020.3337, 2.549853  
46681, 15430, 1020.2718, 2.549698  
46682, 14756, 1020.2099, 2.549543  
46683, 14660, 1020.1479, 2.549388  
46684, 15026, 1020.0860, 2.549234  
46685, 15478, 1020.0241, 2.549079  
46686, 15860, 1019.9622, 2.548924  
46687, 16380, 1019.9002, 2.548769  
46688, 17258, 1019.8383, 2.548615  
46689, 18340, 1019.7764, 2.548460  
46690, 19112, 1019.7145, 2.548305  
46691, 19176, 1019.6525, 2.548150  
46692, 18676, 1019.5906, 2.547996  
46693, 18176, 1019.5287, 2.547841  
46694, 18130, 1019.4668, 2.547686  
46695, 18508, 1019.4048, 2.547531  
46696, 18908, 1019.3429, 2.547377  
46697, 19016, 1019.2810, 2.547222  
46698, 18866, 1019.2190, 2.547067

46699, 18690, 1019.1571, 2.546912  
46700, 18564, 1019.0952, 2.546757  
46701, 18364, 1019.0333, 2.546603  
46702, 17934, 1018.9713, 2.546448  
46703, 17346, 1018.9094, 2.546293  
46704, 16822, 1018.8475, 2.546138  
46705, 16510, 1018.7856, 2.545984  
46706, 16332, 1018.7236, 2.545829  
46707, 16184, 1018.6617, 2.545674  
46708, 16086, 1018.5998, 2.545519  
46709, 16216, 1018.5378, 2.545365  
46710, 16612, 1018.4759, 2.545210  
46711, 17076, 1018.4140, 2.545055  
46712, 17334, 1018.3521, 2.544900  
46713, 17346, 1018.2901, 2.544746  
46714, 17362, 1018.2282, 2.544591  
46715, 17626, 1018.1663, 2.544436  
46716, 18042, 1018.1044, 2.544281  
46717, 18240, 1018.0424, 2.544127  
46718, 17958, 1018.4759, 2.543972  
46719, 17356, 1017.9186, 2.543817  
46720, 16886, 1017.8567, 2.543662  
46721, 16822, 1017.7947, 2.543508  
46722, 17000, 1017.7328, 2.543353  
46723, 17024, 1017.6709, 2.543198  
46724, 16708, 1017.6089, 2.543043  
46725, 16264, 1017.5470, 2.542889  
46726, 16036, 1017.4851, 2.542734  
46727, 16100, 1017.4232, 2.542579  
46728, 16222, 1017.3612, 2.542424  
46729, 16172, 1017.2993, 2.542269  
46730, 16026, 1017.2374, 2.542115  
46731, 16096, 1017.1755, 2.541960  
46732, 16532, 1017.1135, 2.541805  
46733, 17086, 1017.0516, 2.541650  
46734, 17294, 1016.9897, 2.541496  
46735, 16932, 1016.9277, 2.541341  
46736, 16226, 1016.8658, 2.541186  
46737, 15654, 1016.8039, 2.541031  
46738, 15524, 1016.7420, 2.540877  
46739, 15812, 1016.6800, 2.540722  
46740, 16282, 1016.6181, 2.540567  
46741, 16760, 1016.5562, 2.540412  
46742, 17200, 1016.4943, 2.540258  
46743, 17582, 1016.4323, 2.540103  
46744, 17818, 1016.3704, 2.539948  
46745, 17802, 1016.3085, 2.539793  
46746, 17560, 1016.2466, 2.539639  
46747, 17218, 1016.1846, 2.539484  
46748, 16908, 1016.1227, 2.539329  
46749, 16636, 1016.0608, 2.539174  
46750, 16350, 1015.9988, 2.539020  
46751, 16038, 1015.9369, 2.538865  
46752, 15760, 1015.8750, 2.538710  
46753, 15508, 1015.8131, 2.538555  
46754, 15158, 1015.7511, 2.538401  
46755, 14580, 1015.6892, 2.538246  
46756, 13860, 1015.6273, 2.538091  
46757, 13356, 1015.5654, 2.537936  
46758, 13438, 1015.5034, 2.537782  
46759, 14186, 1015.4415, 2.537627  
46760, 15286, 1015.3796, 2.537472  
46761, 16286, 1015.3176, 2.537317  
46762, 16908, 1015.2557, 2.537162  
46763, 17184, 1015.1938, 2.537008  
46764, 17278, 1015.1319, 2.536853  
46765, 17292, 1015.0699, 2.536698  
46766, 17212, 1015.0080, 2.536543  
46767, 17010, 1014.9461, 2.536389  
46768, 16702, 1014.8842, 2.536234  
46769, 16326, 1014.8222, 2.536079  
46770, 15896, 1014.7603, 2.535924  
46771, 15464, 1014.6984, 2.535770  
46772, 15172, 1014.6365, 2.535615  
46773, 15204, 1014.5745, 2.535460  
46774, 15592, 1014.5126, 2.535305

46775, 16078, 1014.4507, 2.535151  
46776, 16292, 1014.3887, 2.534996  
46777, 16098, 1014.3268, 2.534841  
46778, 15790, 1014.2649, 2.534686  
46779, 15834, 1014.2030, 2.534532  
46780, 16402, 1014.1410, 2.534377  
46781, 17146, 1014.0791, 2.534222  
46782, 17468, 1014.0172, 2.534067  
46783, 17070, 1013.9553, 2.533913  
46784, 16182, 1013.8933, 2.533758  
46785, 15316, 1013.8314, 2.533603  
46786, 14810, 1013.7695, 2.533448  
46787, 14602, 1013.7075, 2.533294  
46788, 14450, 1013.6456, 2.533139  
46789, 14266, 1013.5837, 2.532984  
46790, 14176, 1013.5218, 2.532829  
46791, 14330, 1013.4598, 2.532675  
46792, 14668, 1013.3979, 2.532520  
46793, 14978, 1013.3360, 2.532365  
46794, 15118, 1013.2741, 2.532210  
46795, 15132, 1013.2121, 2.532055  
46796, 15140, 1013.1502, 2.531901  
46797, 15174, 1013.0883, 2.531746  
46798, 15192, 1013.0264, 2.531591  
46799, 15238, 1012.9644, 2.531436  
46800, 15464, 1012.9025, 2.531282  
46801, 15960, 1012.8406, 2.531127  
46802, 16548, 1012.7786, 2.530972  
46803, 16864, 1012.7167, 2.530817  
46804, 16670, 1012.6548, 2.530663  
46805, 16138, 1012.5929, 2.530508  
46806, 15702, 1012.5309, 2.530353  
46807, 15656, 1012.4690, 2.530198  
46808, 15888, 1012.4071, 2.530044  
46809, 16034, 1012.3452, 2.529889  
46810, 15878, 1012.2832, 2.529734  
46811, 15522, 1012.2213, 2.529579  
46812, 15220, 1012.1594, 2.529425  
46813, 15070, 1012.0974, 2.529270  
46814, 14978, 1012.0355, 2.529115  
46815, 14858, 1011.9736, 2.528960  
46816, 14802, 1011.9117, 2.528806  
46817, 14952, 1011.8497, 2.528651  
46818, 15236, 1011.7878, 2.528496  
46819, 15368, 1011.7259, 2.528341  
46820, 15182, 1011.6640, 2.528187  
46821, 14910, 1011.6020, 2.528032  
46822, 15050, 1011.5401, 2.527877  
46823, 15810, 1011.4782, 2.527722  
46824, 16842, 1011.4163, 2.527568  
46825, 17494, 1011.3543, 2.527413  
46826, 17494, 1011.2924, 2.527258  
46827, 17216, 1011.2305, 2.527103  
46828, 17326, 1011.1685, 2.526948  
46829, 18068, 1011.1066, 2.526794  
46830, 18998, 1011.0447, 2.526639  
46831, 19412, 1010.9828, 2.526484  
46832, 19060, 1010.9208, 2.526329  
46833, 18288, 1010.8589, 2.526175  
46834, 17614, 1010.7970, 2.526020  
46835, 17196, 1010.7351, 2.525865  
46836, 16804, 1010.6731, 2.525710  
46837, 16252, 1010.6112, 2.525556  
46838, 15754, 1010.5493, 2.525401  
46839, 15740, 1010.4873, 2.525246  
46840, 16344, 1010.4254, 2.525091  
46841, 17210, 1010.3635, 2.524937  
46842, 17816, 1010.3016, 2.524782  
46843, 17968, 1010.2396, 2.524627  
46844, 17884, 1010.1777, 2.524472  
46845, 17828, 1010.1158, 2.524318  
46846, 17768, 1010.0539, 2.524163  
46847, 17452, 1009.9919, 2.524008  
46848, 16854, 1009.9300, 2.523853  
46849, 16304, 1009.8681, 2.523699  
46850, 16216, 1009.8062, 2.523544

46851, 16584, 1009.7442, 2.523389  
46852, 16978, 1009.6823, 2.523234  
46853, 16950, 1009.6204, 2.523080  
46854, 16512, 1009.5584, 2.522925  
46855, 16064, 1009.4965, 2.522770  
46856, 15834, 1009.4346, 2.522615  
46857, 15602, 1009.3727, 2.522461  
46858, 14930, 1009.3107, 2.522306  
46859, 13788, 1009.2488, 2.522151  
46860, 12758, 1009.1869, 2.521996  
46861, 12568, 1009.1250, 2.521841  
46862, 13386, 1009.0630, 2.521687  
46863, 14608, 1009.0011, 2.521532  
46864, 15400, 1008.9392, 2.521377  
46865, 15390, 1008.8772, 2.521222  
46866, 14922, 1008.8153, 2.521068  
46867, 14604, 1008.7534, 2.520913  
46868, 14726, 1008.6915, 2.520758  
46869, 15128, 1008.6295, 2.520603  
46870, 15454, 1008.5676, 2.520449  
46871, 15530, 1008.5057, 2.520294  
46872, 15390, 1008.4438, 2.520139  
46873, 15138, 1008.3818, 2.519984  
46874, 14862, 1008.3199, 2.519830  
46875, 14698, 1008.2580, 2.519675  
46876, 14846, 1008.1961, 2.519520  
46877, 15404, 1008.1341, 2.519365  
46878, 16174, 1008.0722, 2.519211  
46879, 16758, 1008.0103, 2.519056  
46880, 16884, 1007.9483, 2.518901  
46881, 16720, 1007.8864, 2.518746  
46882, 16712, 1007.8245, 2.518592  
46883, 17116, 1007.7626, 2.518437  
46884, 17712, 1007.7006, 2.518282  
46885, 17964, 1007.6387, 2.518127  
46886, 17534, 1007.5768, 2.517973  
46887, 16542, 1007.5149, 2.517818  
46888, 15412, 1007.4529, 2.517663  
46889, 14448, 1007.3910, 2.517508  
46890, 13684, 1007.3291, 2.517354  
46891, 13076, 1007.2672, 2.517199  
46892, 12714, 1007.2052, 2.517044  
46893, 12758, 1007.1433, 2.516889  
46894, 13230, 1007.0814, 2.516734  
46895, 13914, 1007.0194, 2.516580  
46896, 14584, 1006.9575, 2.516425  
46897, 15270, 1006.8956, 2.516270  
46898, 16226, 1006.8337, 2.516115  
46899, 17522, 1006.7717, 2.515961  
46900, 18812, 1006.7098, 2.515806  
46901, 19524, 1006.6479, 2.515651  
46902, 19364, 1006.5860, 2.515496  
46903, 18594, 1006.5240, 2.515342  
46904, 17790, 1006.4621, 2.515187  
46905, 17336, 1006.4002, 2.515032  
46906, 17200, 1006.3382, 2.514877  
46907, 17156, 1006.2763, 2.514723  
46908, 17104, 1006.2144, 2.514568  
46909, 17112, 1006.1525, 2.514413  
46910, 17138, 1006.0905, 2.514258  
46911, 16914, 1006.0286, 2.514104  
46912, 16194, 1005.9667, 2.513949  
46913, 15134, 1005.9048, 2.513794  
46914, 14256, 1005.8428, 2.513639  
46915, 14000, 1005.7809, 2.513485  
46916, 14254, 1005.7190, 2.513330  
46917, 14452, 1005.6571, 2.513175  
46918, 14186, 1005.5951, 2.513020  
46919, 13640, 1005.5332, 2.512866  
46920, 13406, 1005.4713, 2.512711  
46921, 13820, 1005.4093, 2.512556  
46922, 14592, 1005.3474, 2.512401  
46923, 15108, 1005.2855, 2.512247  
46924, 15096, 1005.2236, 2.512092  
46925, 14856, 1005.1616, 2.511937  
46926, 14910, 1005.0997, 2.511782

46927, 15416, 1005.0378, 2.511627  
46928, 16072, 1004.9759, 2.511473  
46929, 16530, 1004.9139, 2.511318  
46930, 16814, 1004.8520, 2.511163  
46931, 17206, 1004.7901, 2.511008  
46932, 17816, 1004.7281, 2.510854  
46933, 18336, 1004.6662, 2.510699  
46934, 18366, 1004.6043, 2.510544  
46935, 17902, 1004.5424, 2.510389  
46936, 17412, 1004.4804, 2.510235  
46937, 17330, 1004.4185, 2.510080  
46938, 17586, 1004.3566, 2.509925  
46939, 17662, 1004.2947, 2.509770  
46940, 17164, 1004.2327, 2.509616  
46941, 16246, 1004.1708, 2.509461  
46942, 15448, 1004.1089, 2.509306  
46943, 15106, 1004.0470, 2.509151  
46944, 15098, 1003.9850, 2.508997  
46945, 15064, 1003.9231, 2.508842  
46946, 14908, 1003.8612, 2.508687  
46947, 14888, 1003.7992, 2.508532  
46948, 15246, 1003.7373, 2.508378  
46949, 15846, 1003.6754, 2.508223  
46950, 16280, 1003.6135, 2.508068  
46951, 16338, 1003.5515, 2.507913  
46952, 16238, 1003.4896, 2.507759  
46953, 16360, 1003.4277, 2.507604  
46954, 16772, 1003.3658, 2.507449  
46955, 17148, 1003.3038, 2.507294  
46956, 17180, 1003.2419, 2.507140  
46957, 16986, 1003.1800, 2.506985  
46958, 17038, 1003.1180, 2.506830  
46959, 17586, 1003.0561, 2.506675  
46960, 18316, 1002.9942, 2.506520  
46961, 18644, 1002.9323, 2.506366  
46962, 18318, 1002.8703, 2.506211  
46963, 17726, 1002.8084, 2.506056  
46964, 17480, 1002.7465, 2.505901  
46965, 17760, 1002.6846, 2.505747  
46966, 18142, 1002.6226, 2.505592  
46967, 18062, 1002.5607, 2.505437  
46968, 17412, 1002.4988, 2.505282  
46969, 16634, 1002.4369, 2.505128  
46970, 16246, 1002.3749, 2.504973  
46971, 16324, 1002.3130, 2.504818  
46972, 16528, 1002.2511, 2.504663  
46973, 16536, 1002.1891, 2.504509  
46974, 16372, 1002.1272, 2.504354  
46975, 16272, 1002.0653, 2.504199  
46976, 16332, 1002.0034, 2.504044  
46977, 16366, 1001.9414, 2.503890  
46978, 16166, 1001.8795, 2.503735  
46979, 15794, 1001.8176, 2.503580  
46980, 15566, 1001.7557, 2.503425  
46981, 15728, 1001.6937, 2.503271  
46982, 16196, 1001.6318, 2.503116  
46983, 16642, 1001.5699, 2.502961  
46984, 16808, 1001.5079, 2.502806  
46985, 16692, 1001.4460, 2.502652  
46986, 16472, 1001.3841, 2.502497  
46987, 16320, 1001.3222, 2.502342  
46988, 16350, 1001.2602, 2.502187  
46989, 16648, 1001.1983, 2.502033  
46990, 17246, 1001.1364, 2.501878  
46991, 17978, 1001.0745, 2.501723  
46992, 18418, 1001.0125, 2.501568  
46993, 18130, 1000.9506, 2.501413  
46994, 17074, 1000.8887, 2.501259  
46995, 15752, 1000.8268, 2.501104  
46996, 14888, 1000.7648, 2.500949  
46997, 14900, 1000.7029, 2.500794  
46998, 15656, 1000.6410, 2.500640  
46999, 16686, 1000.5790, 2.500485  
47000, 17604, 1000.5171, 2.500330  
47001, 18268, 1000.4552, 2.500175  
47002, 18648, 1000.3933, 2.500021  
47003, 18648, 1000.3313, 2.499866  
47004, 18212, 1000.2694, 2.499711  
47005, 17530, 1000.2075, 2.499556  
47006, 17050, 1000.1456, 2.499402  
47007, 17080, 1000.0836, 2.499247  
47008, 17436, 1000.0217, 2.499092  
47009, 17536, 999.9598, 2.498937  
47010, 16936, 999.8978, 2.498783  
47011, 15776, 999.8359, 2.498628  
47012, 14668, 999.7740, 2.498473  
47013, 14118, 999.7121, 2.498318  
47014, 14106, 999.6501, 2.498164  
47015, 14238, 999.5882, 2.498009  
47016, 14248, 999.5263, 2.497854  
47017, 14270, 999.4644, 2.497699  
47018, 14570, 999.4024, 2.497545  
47019, 15134, 999.3405, 2.497390  
47020, 15564, 999.2786, 2.497235  
47021, 15480, 999.2167, 2.497080  
47022, 14932, 999.1547, 2.496925  
47023, 14362, 999.0928, 2.496771  
47024, 14178, 999.0309, 2.496616  
47025, 14412, 998.9689, 2.496461  
47026, 14780, 998.9070, 2.496306  
47027, 15040, 998.8451, 2.496152  
47028, 15188, 998.7832, 2.495997  
47029, 15312, 998.7212, 2.495842  
47030, 15348, 998.6593, 2.495687  
47031, 15148, 998.5974, 2.495533  
47032, 14716, 998.5355, 2.495378  
47033, 14294, 998.4735, 2.495223  
47034, 14152, 998.4116, 2.495068  
47035, 14262, 998.3497, 2.494914  
47036, 14330, 998.2877, 2.494759  
47037, 14154, 998.2258, 2.494604  
47038, 13940, 998.1639, 2.494449  
47039, 14098, 998.1020, 2.494295  
47040, 14762, 998.0400, 2.494140  
47041, 15550, 997.9781, 2.493985  
47042, 15900, 997.9162, 2.493830  
47043, 15674, 997.8543, 2.493676  
47044, 15334, 997.7923, 2.493521  
47045, 15480, 997.7304, 2.493366  
47046, 16210, 997.6685, 2.493211  
47047, 16992, 997.6066, 2.493057  
47048, 17182, 997.5446, 2.492902  
47049, 16618, 997.4827, 2.492747  
47050, 15698, 997.4208, 2.492592  
47051, 14920, 997.3588, 2.492438  
47052, 14472, 997.2969, 2.492283  
47053, 14244, 997.2350, 2.492128  
47054, 14180, 997.1731, 2.491973  
47055, 14430, 997.1111, 2.491818  
47056, 15074, 997.0492, 2.491664  
47057, 15858, 996.9873, 2.491509  
47058, 16264, 996.9254, 2.491354  
47059, 16016, 996.8634, 2.491199  
47060, 15378, 996.8015, 2.491045  
47061, 14894, 996.7396, 2.490890  
47062, 14852, 996.6776, 2.490735  
47063, 14998, 996.6157, 2.490580  
47064, 14884, 996.5538, 2.490426  
47065, 14374, 996.4919, 2.490271  
47066, 13838, 996.4299, 2.490116  
47067, 13738, 996.3680, 2.489961  
47068, 14200, 996.3061, 2.489807  
47069, 14972, 996.2442, 2.489652  
47070, 15810, 996.1822, 2.489497  
47071, 16718, 996.1203, 2.489342  
47072, 17752, 996.0584, 2.489188  
47073, 18678, 995.9965, 2.489033  
47074, 18988, 995.9345, 2.488878  
47075, 18376, 995.8726, 2.488723  
47076, 17162, 995.8107, 2.488569  
47077, 16160, 995.7487, 2.488414  
47078, 16040, 995.6868, 2.488259  
47079, 16786, 995.6249, 2.488104  
47080, 17820, 995.5630, 2.487950  
47081, 18582, 995.5010, 2.487795  
47082, 18924, 995.4391, 2.487640  
47083, 19008, 995.3772, 2.487485  
47084, 18922, 995.3153, 2.487331  
47085, 18554, 995.2533, 2.487176  
47086, 17874, 995.1914, 2.487021  
47087, 17170, 995.1295, 2.486866  
47088, 16872, 995.0675, 2.486711  
47089, 17084, 995.0056, 2.486557  
47090, 17424, 994.9437, 2.486402  
47091, 17418, 994.8818, 2.486247  
47092, 17034, 994.8198, 2.486092  
47093, 16728, 994.7579, 2.485938  
47094, 16930, 994.6960, 2.485783  
47095, 17510, 994.6341, 2.485628  
47096, 17870, 994.5721, 2.485473  
47097, 17580, 994.5102, 2.485319  
47098, 16864, 994.4483, 2.485164  
47099, 16364, 994.3864, 2.485009  
47100, 16502, 994.3244, 2.484854  
47101, 17024, 994.2625, 2.484700  
47102, 17354, 994.2006, 2.484545  
47103, 17172, 994.1386, 2.484390  
47104, 16670, 994.0767, 2.484235  
47105, 16184, 994.0148, 2.484081  
47106, 15720, 993.9529, 2.483926  
47107, 14988, 993.8909, 2.483771  
47108, 13890, 993.8290, 2.483616  
47109, 12882, 993.7671, 2.483462  
47110, 12646, 993.7052, 2.483307  
47111, 13422, 993.6432, 2.483152  
47112, 14688, 993.5813, 2.482997  
47113, 15572, 993.5194, 2.482843  
47114, 15610, 993.4575, 2.482688  
47115, 15074, 993.3955, 2.482533  
47116, 14616, 993.3336, 2.482378  
47117, 14636, 993.2717, 2.482224  
47118, 15050, 993.2097, 2.482069  
47119, 15590, 993.1478, 2.481914  
47120, 16130, 993.0859, 2.481759  
47121, 16730, 993.0240, 2.481604  
47122, 17366, 992.9620, 2.481450  
47123, 17832, 992.9001, 2.481295  
47124, 17940, 992.8382, 2.481140  
47125, 17794, 992.7763, 2.480985  
47126, 17720, 992.7143, 2.480831  
47127, 17908, 992.6524, 2.480676  
47128, 18160, 992.5905, 2.480521  
47129, 18080, 992.5285, 2.480366  
47130, 17524, 992.4666, 2.480212  
47131, 16786, 992.4047, 2.480057  
47132, 16336, 992.3428, 2.479902  
47133, 16332, 992.2808, 2.479747  
47134, 16526, 992.2189, 2.479593  
47135, 16566, 992.1570, 2.479438  
47136, 16400, 992.0951, 2.479283  
47137, 16284, 992.0331, 2.479128  
47138, 16464, 991.9712, 2.478974  
47139, 16882, 991.9093, 2.478819  
47140, 17234, 991.8474, 2.478664  
47141, 17290, 991.7854, 2.478509  
47142, 17036, 991.7235, 2.478355  
47143, 16610, 991.6616, 2.478200  
47144, 16090, 991.5996, 2.478045  
47145, 15520, 991.5377, 2.477890  
47146, 15008, 991.4758, 2.477736  
47147, 14804, 991.4139, 2.477581  
47148, 15092, 991.3519, 2.477426  
47149, 15786, 991.2900, 2.477271  
47150, 16552, 991.2281, 2.477117  
47151, 17134, 991.1662, 2.476962  
47152, 17566, 991.1042, 2.476807  
47153, 18082, 991.0423, 2.476652  
47154, 18780, 990.9804, 2.476497

47155, 19456, 990.9184, 2.476343  
47156, 19800, 990.8565, 2.476188  
47157, 19700, 990.7946, 2.476033  
47158, 19296, 990.7327, 2.475878  
47159, 18758, 990.6707, 2.475724  
47160, 18060, 990.6088, 2.475569  
47161, 17084, 990.5469, 2.475414  
47162, 15914, 990.4850, 2.475259  
47163, 14894, 990.4230, 2.475105  
47164, 14356, 990.3611, 2.474950  
47165, 14244, 990.2992, 2.474795  
47166, 14168, 990.2373, 2.474640  
47167, 13854, 990.1753, 2.474486  
47168, 13486, 990.1134, 2.474331  
47169, 13554, 990.0515, 2.474176  
47170, 14290, 989.9895, 2.474021  
47171, 15354, 989.9276, 2.473867  
47172, 16108, 989.8657, 2.473712  
47173, 16282, 989.8038, 2.473557  
47174, 16204, 989.7418, 2.473402  
47175, 16422, 989.6799, 2.473248  
47176, 17044, 989.6180, 2.473093  
47177, 17588, 989.5561, 2.472938  
47178, 17482, 989.4941, 2.472783  
47179, 16672, 989.4322, 2.472629  
47180, 15680, 989.3703, 2.472474  
47181, 15092, 989.3083, 2.472319  
47182, 15002, 989.2464, 2.472164  
47183, 15074, 989.1845, 2.472010  
47184, 15032, 989.1226, 2.471855  
47185, 14990, 989.0606, 2.471700  
47186, 15264, 988.9987, 2.471545  
47187, 15936, 988.9368, 2.471390  
47188, 16698, 988.8749, 2.471236  
47189, 17192, 988.8129, 2.471081  
47190, 17408, 988.7510, 2.470926  
47191, 17640, 988.6891, 2.470771  
47192, 18106, 988.6272, 2.470617  
47193, 18618, 988.5652, 2.470462  
47194, 18766, 988.5033, 2.470307  
47195, 18400, 988.4414, 2.470152  
47196, 17792, 988.3794, 2.469998  
47197, 17376, 988.3175, 2.469843  
47198, 17266, 988.2556, 2.469688  
47199, 17212, 988.1937, 2.469533  
47200, 16950, 988.1317, 2.469379  
47201, 16568, 988.0698, 2.469224  
47202, 16418, 988.0079, 2.469069  
47203, 16698, 987.9460, 2.468914  
47204, 17176, 987.8840, 2.468760  
47205, 17412, 987.8221, 2.468605  
47206, 17202, 987.7602, 2.468450  
47207, 16784, 987.6982, 2.468295  
47208, 16536, 987.6363, 2.468141  
47209, 16546, 987.5744, 2.467986  
47210, 16554, 987.5125, 2.467831  
47211, 16286, 987.4505, 2.467676  
47212, 15794, 987.3886, 2.467522  
47213, 15432, 987.3267, 2.467367  
47214, 15504, 987.2648, 2.467212  
47215, 16004, 987.2028, 2.467057  
47216, 16696, 987.1409, 2.466903  
47217, 17394, 987.0790, 2.466748  
47218, 18074, 987.0171, 2.466593  
47219, 18750, 986.9551, 2.466438  
47220, 19290, 986.8932, 2.466283  
47221, 19508, 986.8313, 2.466129  
47222, 19370, 986.7693, 2.465974  
47223, 19080, 986.7074, 2.465819  
47224, 18908, 986.6455, 2.465664  
47225, 18878, 986.5836, 2.465510  
47226, 18748, 986.5216, 2.465355  
47227, 18250, 986.4597, 2.465200  
47228, 17378, 986.3978, 2.465045  
47229, 16392, 986.3359, 2.464891  
47230, 15584, 986.2739, 2.464736  
47231, 15078, 986.2120, 2.464581  
47232, 14856, 986.1501, 2.464426  
47233, 14908, 986.0881, 2.464272  
47234, 15286, 986.0262, 2.464117  
47235, 15966, 985.9643, 2.463962  
47236, 16738, 985.9024, 2.463807  
47237, 17284, 985.8404, 2.463653  
47238, 17420, 985.7785, 2.463498  
47239, 17212, 985.7166, 2.463343  
47240, 16872, 985.6547, 2.463188  
47241, 16602, 985.5927, 2.463034  
47242, 16504, 985.5308, 2.462879  
47243, 16704, 985.4689, 2.462724  
47244, 17350, 985.4070, 2.462569  
47245, 18482, 985.3450, 2.462415  
47246, 19830, 985.2831, 2.462260  
47247, 20884, 985.2212, 2.462105  
47248, 21228, 985.1592, 2.461950  
47249, 20846, 985.0973, 2.461796  
47250, 20084, 985.0354, 2.461641  
47251, 19300, 984.9735, 2.461486  
47252, 18602, 984.9115, 2.461331  
47253, 17902, 984.8496, 2.461176  
47254, 17198, 984.7877, 2.461022  
47255, 16700, 984.7258, 2.460867  
47256, 16590, 984.6638, 2.460712  
47257, 16744, 984.6019, 2.460557  
47258, 16756, 984.5400, 2.460403  
47259, 16316, 984.4780, 2.460248  
47260, 15574, 984.4161, 2.460093  
47261, 15008, 984.3542, 2.459938  
47262, 14984, 984.2923, 2.459784  
47263, 15430, 984.2303, 2.459629  
47264, 15948, 984.1684, 2.459474  
47265, 16264, 984.1065, 2.459319  
47266, 16428, 984.0446, 2.459165  
47267, 16654, 983.9826, 2.459010  
47268, 16984, 983.9207, 2.458855  
47269, 17246, 983.8588, 2.458700  
47270, 17300, 983.7969, 2.458546  
47271, 17272, 983.7349, 2.458391  
47272, 17426, 983.6730, 2.458236  
47273, 17818, 983.6111, 2.458081  
47274, 18188, 983.5491, 2.457927  
47275, 18262, 983.4872, 2.457772  
47276, 18102, 983.4253, 2.457617  
47277, 18108, 983.3634, 2.457462  
47278, 18544, 983.3014, 2.457308  
47279, 19210, 983.2395, 2.457153  
47280, 19532, 983.1776, 2.456998  
47281, 19150, 983.1157, 2.456843  
47282, 18302, 983.0537, 2.456689  
47283, 17590, 982.9918, 2.456534  
47284, 17406, 982.9299, 2.456379  
47285, 17606, 982.8679, 2.456224  
47286, 17728, 982.8060, 2.456069  
47287, 17536, 982.7441, 2.455915  
47288, 17252, 982.6822, 2.455760  
47289, 17252, 982.6202, 2.455605  
47290, 17644, 982.5583, 2.455450  
47291, 18152, 982.4964, 2.455296  
47292, 18418, 982.4345, 2.455141  
47293, 18316, 982.3725, 2.454986  
47294, 17986, 982.3106, 2.454831  
47295, 17580, 982.2487, 2.454677  
47296, 17130, 982.1868, 2.454522  
47297, 16616, 982.1248, 2.454367  
47298, 16128, 982.0629, 2.454212  
47299, 15834, 982.0010, 2.454058  
47300, 15750, 981.9390, 2.453903  
47301, 15736, 981.8771, 2.453748  
47302, 15626, 981.8152, 2.453593  
47303, 15476, 981.7533, 2.453439  
47304, 15484, 981.6913, 2.453284  
47305, 15692, 981.6294, 2.453129  
47306, 15820, 981.5675, 2.452974  
47307, 15500, 981.5056, 2.452820  
47308, 14742, 981.4436, 2.452665  
47309, 14062, 981.3817, 2.452510  
47310, 14046, 981.3198, 2.452355  
47311, 14774, 981.2578, 2.452201  
47312, 15742, 981.1959, 2.452046  
47313, 16372, 981.1340, 2.451891  
47314, 16612, 981.0721, 2.451736  
47315, 16938, 981.0101, 2.451581  
47316, 17734, 980.9482, 2.451427  
47317, 18788, 980.8863, 2.451272  
47318, 19414, 980.8244, 2.451117  
47319, 19164, 980.7624, 2.450962  
47320, 18344, 980.7005, 2.450808  
47321, 17770, 980.6386, 2.450653  
47322, 18028, 980.5767, 2.449898  
47323, 18996, 980.5147, 2.450343  
47324, 20062, 980.4528, 2.450189  
47325, 20758, 980.3909, 2.450034  
47326, 21102, 980.3289, 2.449879  
47327, 21356, 980.2670, 2.449724  
47328, 21618, 980.2051, 2.449570  
47329, 21734, 980.1432, 2.449415  
47330, 21592, 980.0812, 2.449260  
47331, 21376, 980.0193, 2.449105  
47332, 21394, 979.9574, 2.448951  
47333, 21664, 979.8955, 2.448796  
47334, 21780, 979.8335, 2.448641  
47335, 21278, 979.7716, 2.448486  
47336, 20110, 979.7097, 2.448332  
47337, 18742, 979.6478, 2.448177  
47338, 17766, 979.5858, 2.448022  
47339, 17432, 979.5239, 2.447867  
47340, 17538, 979.4620, 2.447713  
47341, 17772, 979.4000, 2.447558  
47342, 18000, 979.3381, 2.447403  
47343, 18264, 979.2762, 2.447248  
47344, 18530, 979.2143, 2.447094  
47345, 18592, 979.1523, 2.446939  
47346, 18260, 979.0904, 2.446784  
47347, 17580, 979.0285, 2.446629  
47348, 16828, 978.9666, 2.446474  
47349, 16260, 978.9046, 2.446320  
47350, 15884, 978.8427, 2.446165  
47351, 15550, 978.7808, 2.446010  
47352, 15172, 978.7188, 2.445855  
47353, 14838, 978.6569, 2.445701  
47354, 14700, 978.5950, 2.445546  
47355, 14808, 978.5331, 2.445391  
47356, 15078, 978.4711, 2.445236  
47357, 15456, 978.4092, 2.445082  
47358, 15960, 978.3473, 2.444927  
47359, 16594, 978.2854, 2.444772  
47360, 17236, 978.2234, 2.444617  
47361, 17726, 978.1615, 2.444463  
47362, 18046, 978.0996, 2.444308  
47363, 18358, 978.0377, 2.444153  
47364, 18790, 977.9757, 2.443998  
47365, 19164, 977.9138, 2.443844  
47366, 19112, 977.8519, 2.443689  
47367, 18454, 977.7899, 2.443534  
47368, 17552, 977.7280, 2.443379  
47369, 17084, 977.6661, 2.443225  
47370, 17442, 977.6042, 2.443070  
47371, 18286, 977.5422, 2.442915  
47372, 18824, 977.4803, 2.442760  
47373, 18522, 977.4184, 2.442606  
47374, 17584, 977.3565, 2.442451  
47375, 16742, 977.2945, 2.442296  
47376, 16570, 977.2326, 2.442141  
47377, 17016, 977.1707, 2.441987  
47378, 17574, 977.1087, 2.441832  
47379, 17832, 977.0468, 2.441677  
47380, 17772, 976.9849, 2.441522  
47381, 17608, 976.9230, 2.441367  
47382, 17426, 976.8610, 2.441213

47383, 17128, 976.7991, 2.441058  
47384, 16676, 976.7372, 2.440903  
47385, 16260, 976.6753, 2.440748  
47386, 16170, 976.6133, 2.440594  
47387, 16460, 976.5514, 2.440439  
47388, 16902, 976.4895, 2.440284  
47389, 17222, 976.4276, 2.440129  
47390, 17412, 976.3656, 2.439975  
47391, 17684, 976.3037, 2.439820  
47392, 18130, 976.2418, 2.439665  
47393, 18538, 976.1798, 2.439510  
47394, 18538, 976.1179, 2.439356  
47395, 18022, 976.0560, 2.439201  
47396, 17270, 975.9941, 2.439046  
47397, 16662, 975.9321, 2.438891  
47398, 16310, 975.8702, 2.438737  
47399, 16020, 975.8083, 2.438582  
47400, 15638, 975.7464, 2.438427  
47401, 15318, 975.6844, 2.438272  
47402, 15398, 975.6225, 2.438118  
47403, 15966, 975.5606, 2.437963  
47404, 16678, 975.4986, 2.437808  
47405, 17072, 975.4367, 2.437653  
47406, 17004, 975.3748, 2.437499  
47407, 16772, 975.3129, 2.437344  
47408, 16758, 975.2509, 2.437189  
47409, 17012, 975.1890, 2.437034  
47410, 17270, 975.1271, 2.436880  
47411, 17320, 975.0652, 2.436725  
47412, 17294, 975.0032, 2.436570  
47413, 17496, 974.9413, 2.436415  
47414, 17980, 974.8794, 2.436260  
47415, 18422, 974.8175, 2.436106  
47416, 18436, 974.7555, 2.435951  
47417, 18042, 974.6936, 2.435796  
47418, 17658, 974.6317, 2.435641  
47419, 17740, 974.5697, 2.435487  
47420, 18266, 974.5078, 2.435332  
47421, 18804, 974.4459, 2.435177  
47422, 18964, 974.3840, 2.435022  
47423, 18770, 974.3220, 2.434868  
47424, 18582, 974.2601, 2.434713  
47425, 18716, 974.1982, 2.434558  
47426, 19166, 974.1363, 2.434403  
47427, 19698, 974.0743, 2.434249  
47428, 20132, 974.0124, 2.434094  
47429, 20414, 973.9505, 2.433939  
47430, 20506, 973.8885, 2.433784  
47431, 20270, 973.8266, 2.433630  
47432, 19602, 973.7647, 2.433475  
47433, 18612, 973.7028, 2.433320  
47434, 17604, 973.6408, 2.433165  
47435, 16806, 973.5789, 2.433011  
47436, 16186, 973.5170, 2.432856  
47437, 15570, 973.4551, 2.432701  
47438, 14960, 973.3931, 2.432546  
47439, 14656, 973.3312, 2.432392  
47440, 14966, 973.2693, 2.432237  
47441, 15836, 973.2074, 2.432082  
47442, 16794, 973.1454, 2.431927  
47443, 17356, 973.0835, 2.431773  
47444, 17458, 973.0216, 2.431618  
47445, 17420, 972.9596, 2.431463  
47446, 17566, 972.8977, 2.431308  
47447, 17876, 972.8358, 2.431153  
47448, 18088, 972.7739, 2.430999  
47449, 18090, 972.7119, 2.430844  
47450, 18064, 972.6500, 2.430689  
47451, 18240, 972.5881, 2.430534  
47452, 18554, 972.5262, 2.430380  
47453, 18692, 972.4642, 2.430225  
47454, 18456, 972.4023, 2.430070  
47455, 18068, 972.3404, 2.429915  
47456, 17968, 972.2784, 2.429761  
47457, 18328, 972.2165, 2.429606  
47458, 18862, 972.1546, 2.429451  
47459, 19124, 972.0927, 2.429296  
47460, 19032, 972.0307, 2.429142  
47461, 18944, 971.9688, 2.428987  
47462, 19206, 971.9069, 2.428832  
47463, 19698, 971.8450, 2.428677  
47464, 19896, 971.7830, 2.428523  
47465, 19450, 971.7211, 2.428368  
47466, 18578, 971.6592, 2.428213  
47467, 17862, 971.5973, 2.428058  
47468, 17646, 971.5353, 2.427904  
47469, 17724, 971.4734, 2.427749  
47470, 17652, 971.4115, 2.427594  
47471, 17290, 971.3495, 2.427439  
47472, 16950, 971.2876, 2.427285  
47473, 16982, 971.2257, 2.427130  
47474, 17332, 971.1638, 2.426975  
47475, 17598, 971.1018, 2.426820  
47476, 17490, 971.0399, 2.426666  
47477, 17206, 970.9780, 2.426511  
47478, 17150, 970.9161, 2.426356  
47479, 17440, 970.8541, 2.426201  
47480, 17722, 970.7922, 2.426046  
47481, 17566, 970.7303, 2.425892  
47482, 16988, 970.6683, 2.425737  
47483, 16492, 970.6064, 2.425582  
47484, 16536, 970.5445, 2.425427  
47485, 17058, 970.4826, 2.425273  
47486, 17562, 970.4206, 2.425118  
47487, 17670, 970.3587, 2.424963  
47488, 17474, 970.2968, 2.424808  
47489, 17328, 970.2349, 2.424654  
47490, 17366, 970.1729, 2.424499  
47491, 17334, 970.1110, 2.424344  
47492, 16990, 970.0491, 2.424189  
47493, 16470, 969.9872, 2.424035  
47494, 16200, 969.9252, 2.423880  
47495, 16400, 969.8633, 2.423725  
47496, 16744, 969.8014, 2.423570  
47497, 16686, 969.7394, 2.423416  
47498, 16074, 969.6775, 2.423261  
47499, 15368, 969.6156, 2.423106  
47500, 15198, 969.5537, 2.422951  
47501, 15708, 969.4917, 2.422797  
47502, 16432, 969.4298, 2.422642  
47503, 16812, 969.3679, 2.422487  
47504, 16820, 969.3060, 2.422332  
47505, 16920, 969.2440, 2.422178  
47506, 17478, 969.1821, 2.422023  
47507, 18294, 969.1202, 2.421868  
47508, 18780, 969.0582, 2.421713  
47509, 18596, 968.9963, 2.421559  
47510, 17990, 968.9344, 2.421404  
47511, 17538, 968.8725, 2.421249  
47512, 17518, 968.8105, 2.421094  
47513, 17700, 968.7486, 2.420939  
47514, 17694, 968.6867, 2.420785  
47515, 17440, 968.6248, 2.420630  
47516, 17236, 968.5628, 2.420475  
47517, 17356, 968.5009, 2.420320  
47518, 17706, 968.4390, 2.420166  
47519, 17924, 968.3771, 2.420011  
47520, 17806, 968.3151, 2.419856  
47521, 17544, 968.2532, 2.419701  
47522, 17470, 968.1913, 2.419547  
47523, 17688, 968.1293, 2.419392  
47524, 17990, 968.0674, 2.419237  
47525, 18116, 968.0055, 2.419082  
47526, 18028, 967.9436, 2.418928  
47527, 17852, 967.8816, 2.418773  
47528, 17596, 967.8197, 2.418618  
47529, 17068, 967.7578, 2.418463  
47530, 16166, 967.6959, 2.418309  
47531, 15126, 967.6339, 2.418154  
47532, 14466, 967.5720, 2.417999  
47533, 14508, 967.5101, 2.417844  
47534, 15026, 967.4482, 2.417690  
47535, 15410, 967.3862, 2.417535  
47536, 15222, 967.3243, 2.417380  
47537, 14566, 967.2624, 2.417225  
47538, 13958, 967.2004, 2.417071  
47539, 13808, 967.1385, 2.416916  
47540, 14118, 967.0766, 2.416761  
47541, 14616, 967.0147, 2.416606  
47542, 15096, 966.9527, 2.416452  
47543, 15554, 966.8908, 2.416297  
47544, 16020, 966.8289, 2.416142  
47545, 16362, 966.7670, 2.415987  
47546, 16386, 966.7050, 2.415832  
47547, 16070, 966.6431, 2.415678  
47548, 15664, 966.5812, 2.415523  
47549, 15476, 966.5192, 2.415368  
47550, 15588, 966.4573, 2.415213  
47551, 15810, 966.3954, 2.415059  
47552, 15956, 966.3335, 2.414904  
47553, 16078, 966.2715, 2.414749  
47554, 16396, 966.2096, 2.414594  
47555, 16990, 966.1477, 2.414440  
47556, 17636, 966.0858, 2.414285  
47557, 17966, 966.0238, 2.414130  
47558, 17770, 966.9619, 2.413975  
47559, 17168, 966.9000, 2.413821  
47560, 16450, 966.8381, 2.413666  
47561, 15816, 966.7761, 2.413511  
47562, 15340, 966.7142, 2.413356  
47563, 15046, 966.6523, 2.413202  
47564, 15014, 966.5903, 2.413047  
47565, 15260, 966.5284, 2.412892  
47566, 15652, 966.4665, 2.412737  
47567, 15916, 966.4046, 2.412583  
47568, 15876, 966.3426, 2.412428  
47569, 15612, 966.2807, 2.412273  
47570, 15380, 966.2188, 2.412118  
47571, 15356, 966.1569, 2.411964  
47572, 15498, 966.0949, 2.411809  
47573, 15644, 966.0330, 2.411654  
47574, 15690, 966.9711, 2.411499  
47575, 15656, 966.9091, 2.411344  
47576, 15540, 966.8472, 2.411190  
47577, 15242, 966.7853, 2.411035  
47578, 14686, 966.7234, 2.410880  
47579, 13998, 966.6614, 2.410725  
47580, 13504, 966.5995, 2.410571  
47581, 13476, 966.5376, 2.410416  
47582, 13876, 966.4757, 2.410261  
47583, 14436, 966.4137, 2.410106  
47584, 14976, 966.3518, 2.409952  
47585, 15602, 966.2899, 2.409797  
47586, 16542, 966.2280, 2.409642  
47587, 17756, 966.1660, 2.409487  
47588, 18796, 966.1041, 2.409333  
47589, 19150, 966.0422, 2.409178  
47590, 18730, 966.9802, 2.409023  
47591, 18014, 966.9183, 2.408868  
47592, 17648, 966.8564, 2.408714  
47593, 17888, 966.7945, 2.408559  
47594, 18420, 966.7325, 2.408404  
47595, 18704, 966.6706, 2.408249  
47596, 18430, 966.6087, 2.408095  
47597, 17692, 966.5468, 2.407940  
47598, 16758, 966.4848, 2.407785  
47599, 15834, 966.4229, 2.407630  
47600, 15020, 966.3610, 2.407476  
47601, 14422, 966.2990, 2.407321  
47602, 14194, 966.2371, 2.407166  
47603, 14358, 966.1752, 2.407011  
47604, 14686, 966.1133, 2.406857  
47605, 14842, 966.0513, 2.406702  
47606, 14676, 966.9894, 2.406547  
47607, 14370, 966.9275, 2.406392  
47608, 14244, 966.8656, 2.406237  
47609, 14414, 966.8036, 2.406083  
47610, 14698, 966.7417, 2.405928

47611, 14840, 962.6798, 2.405773  
47612, 14768, 962.6179, 2.405618  
47613, 14626, 962.5559, 2.405464  
47614, 14554, 962.4940, 2.405309  
47615, 14504, 962.4321, 2.405154  
47616, 14374, 962.3701, 2.404999  
47617, 14218, 962.3082, 2.404845  
47618, 14264, 962.2463, 2.404690  
47619, 14684, 962.1844, 2.404535  
47620, 15318, 962.1224, 2.404380  
47621, 15788, 962.0605, 2.404226  
47622, 15820, 961.9986, 2.404071  
47623, 15532, 961.9367, 2.403916  
47624, 15248, 961.8747, 2.403761  
47625, 15150, 961.8128, 2.403607  
47626, 15124, 961.7509, 2.403452  
47627, 14984, 961.6889, 2.403297  
47628, 14812, 961.6270, 2.403142  
47629, 14968, 961.5651, 2.402988  
47630, 15730, 961.5032, 2.402833  
47631, 16950, 961.4412, 2.402678  
47632, 18110, 961.3793, 2.402523  
47633, 18732, 961.3174, 2.402369  
47634, 18738, 961.2555, 2.402214  
47635, 18370, 961.1935, 2.402059  
47636, 17844, 961.1316, 2.401904  
47637, 17196, 961.0697, 2.401750  
47638, 16404, 961.0078, 2.401595  
47639, 15634, 960.9458, 2.401440  
47640, 15176, 960.8839, 2.401285  
47641, 15156, 960.8220, 2.401130  
47642, 15350, 960.7600, 2.400976  
47643, 15354, 960.6981, 2.400821  
47644, 15008, 960.6362, 2.400666  
47645, 14524, 960.5743, 2.400511  
47646, 14242, 960.5123, 2.400357  
47647, 14240, 960.4504, 2.400202  
47648, 14256, 960.3885, 2.400047  
47649, 14048, 960.3266, 2.399892  
47650, 13724, 960.2646, 2.399738  
47651, 13716, 960.2027, 2.399583  
47652, 14336, 960.1408, 2.399428  
47653, 15490, 960.0788, 2.399273  
47654, 16718, 960.0169, 2.399119  
47655, 17624, 959.9550, 2.398964  
47656, 18128, 959.8931, 2.398809  
47657, 18370, 959.8311, 2.398654  
47658, 18458, 959.7692, 2.398500  
47659, 18362, 959.7073, 2.398345  
47660, 18098, 959.6454, 2.398190  
47661, 17824, 959.5834, 2.398035  
47662, 17776, 959.5215, 2.397881  
47663, 17996, 959.4596, 2.397726  
47664, 18278, 959.3977, 2.397571  
47665, 18362, 959.3357, 2.397416  
47666, 18216, 959.2738, 2.397262  
47667, 18008, 959.2119, 2.397107  
47668, 17888, 959.1499, 2.396952  
47669, 17776, 959.0880, 2.396797  
47670, 17486, 959.0261, 2.396643  
47671, 16986, 958.9642, 2.396488  
47672, 16510, 958.9022, 2.396333  
47673, 16288, 958.8403, 2.396178  
47674, 16272, 958.7784, 2.396023  
47675, 16140, 958.7165, 2.395869  
47676, 15664, 958.6545, 2.395714  
47677, 15006, 958.5926, 2.395559  
47678, 14584, 958.5307, 2.395404  
47679, 14692, 958.4687, 2.395250  
47680, 15214, 958.4068, 2.395095  
47681, 15784, 958.3449, 2.394940  
47682, 16168, 958.2830, 2.394785  
47683, 16444, 958.2210, 2.394631  
47684, 16776, 958.1591, 2.394476  
47685, 17154, 958.0972, 2.394321  
47686, 17394, 958.0353, 2.394166

47687, 17402, 957.9733, 2.394012  
47688, 17364, 957.9114, 2.393857  
47689, 17576, 957.8495, 2.393702  
47690, 18078, 957.7876, 2.393547  
47691, 18550, 957.7256, 2.393393  
47692, 18614, 957.6637, 2.393238  
47693, 18228, 957.6018, 2.393083  
47694, 17682, 957.5398, 2.392928  
47695, 17282, 957.4779, 2.392774  
47696, 16998, 957.4160, 2.392619  
47697, 16534, 957.3541, 2.392464  
47698, 15736, 957.2921, 2.392309  
47699, 14822, 957.2302, 2.392155  
47700, 14210, 957.1683, 2.392000  
47701, 14088, 957.1064, 2.391845  
47702, 14286, 957.0444, 2.391690  
47703, 14514, 956.9825, 2.391536  
47704, 14722, 956.9206, 2.391381  
47705, 15096, 956.8586, 2.391226  
47706, 15736, 956.7967, 2.391071  
47707, 16558, 956.7348, 2.390916  
47708, 17174, 956.6729, 2.390762  
47709, 17520, 956.6109, 2.390607  
47710, 17854, 956.5490, 2.390452  
47711, 18456, 956.4871, 2.390297  
47712, 19264, 956.4252, 2.390143  
47713, 19848, 956.3632, 2.389988  
47714, 19830, 956.3013, 2.389833  
47715, 19302, 956.2394, 2.389678  
47716, 18754, 956.1775, 2.389524  
47717, 18604, 956.1155, 2.389369  
47718, 18792, 956.0536, 2.389214  
47719, 18914, 955.9917, 2.389059  
47720, 18684, 955.9297, 2.388905  
47721, 18208, 955.8678, 2.388750  
47722, 17840, 955.8059, 2.388595  
47723, 17742, 955.7440, 2.388440  
47724, 17740, 955.6820, 2.388286  
47725, 17558, 955.6201, 2.388131  
47726, 17176, 955.5582, 2.387976  
47727, 16880, 955.4963, 2.387821  
47728, 16964, 955.4343, 2.387667  
47729, 17428, 955.3724, 2.387512  
47730, 17962, 955.3105, 2.387357  
47731, 18190, 955.2485, 2.387202  
47732, 17918, 955.1866, 2.387048  
47733, 17186, 955.1247, 2.386893  
47734, 16170, 955.0628, 2.386738  
47735, 15142, 955.0008, 2.386583  
47736, 14432, 954.9389, 2.386429  
47737, 14336, 954.8770, 2.386274  
47738, 14916, 954.8151, 2.386119  
47739, 15900, 954.7531, 2.385964  
47740, 16790, 954.6912, 2.385809  
47741, 17232, 954.6293, 2.385655  
47742, 17208, 954.5674, 2.385500  
47743, 16960, 954.5054, 2.385345  
47744, 16718, 954.4435, 2.385190  
47745, 16510, 954.3816, 2.385036  
47746, 16292, 954.3196, 2.384881  
47747, 16110, 954.2577, 2.384726  
47748, 16106, 954.1958, 2.384571  
47749, 16328, 954.1339, 2.384417  
47750, 16618, 954.0719, 2.384262  
47751, 16760, 954.0100, 2.384107  
47752, 16754, 953.9481, 2.383952  
47753, 16854, 953.8862, 2.383798  
47754, 17292, 953.8242, 2.383643  
47755, 17950, 953.7623, 2.383488  
47756, 18404, 953.7004, 2.383333  
47757, 18320, 953.6385, 2.383179  
47758, 17820, 953.5765, 2.383024  
47759, 17406, 953.5146, 2.382869  
47760, 17498, 953.4527, 2.382714  
47761, 18042, 953.3907, 2.382560  
47762, 18618, 953.3288, 2.382405

47763, 18868, 953.2669, 2.382250  
47764, 18786, 953.2050, 2.382095  
47765, 18606, 953.1430, 2.381941  
47766, 18470, 953.0811, 2.381786  
47767, 18266, 953.0192, 2.381631  
47768, 17814, 952.9573, 2.381476  
47769, 17110, 952.8953, 2.381322  
47770, 16360, 952.8334, 2.381167  
47771, 15780, 952.7715, 2.381012  
47772, 15406, 952.7095, 2.380857  
47773, 15174, 952.6476, 2.380702  
47774, 15102, 952.5857, 2.380548  
47775, 15312, 952.5238, 2.380393  
47776, 15850, 952.4618, 2.380238  
47777, 16568, 952.3999, 2.380083  
47778, 17198, 952.3380, 2.379929  
47779, 17600, 952.2761, 2.379774  
47780, 17854, 952.2141, 2.379619  
47781, 18078, 952.1522, 2.379464  
47782, 18242, 952.0903, 2.379310  
47783, 18162, 952.0284, 2.379155  
47784, 17808, 951.9664, 2.379000  
47785, 17432, 951.9045, 2.378845  
47786, 17390, 951.8426, 2.378691  
47787, 17758, 951.7806, 2.378536  
47788, 18204, 951.7187, 2.378381  
47789, 18308, 951.6568, 2.378226  
47790, 17974, 951.5949, 2.378072  
47791, 17534, 951.5329, 2.377917  
47792, 17360, 951.4710, 2.377762  
47793, 17466, 951.4091, 2.377607  
47794, 17542, 951.3472, 2.377453  
47795, 17364, 951.2852, 2.377298  
47796, 17086, 951.2233, 2.377143  
47797, 17054, 951.1614, 2.376988  
47798, 17360, 951.0994, 2.376834  
47799, 17690, 951.0375, 2.376679  
47800, 17646, 950.9756, 2.376524  
47801, 17204, 950.9137, 2.376369  
47802, 16776, 950.8517, 2.376215  
47803, 16740, 950.7898, 2.376060  
47804, 17012, 950.7279, 2.375905  
47805, 17108, 950.6660, 2.375750  
47806, 16690, 950.6040, 2.375595  
47807, 15968, 950.5421, 2.375441  
47808, 15490, 950.4802, 2.375286  
47809, 15596, 950.4183, 2.375131  
47810, 16110, 950.3563, 2.374976  
47811, 16604, 950.2944, 2.374822  
47812, 16874, 950.2325, 2.374667  
47813, 17088, 950.1705, 2.374512  
47814, 17480, 950.1086, 2.374357  
47815, 17982, 950.0467, 2.374203  
47816, 18266, 949.9848, 2.374048  
47817, 18162, 949.9228, 2.373893  
47818, 17860, 949.8609, 2.373738  
47819, 17708, 949.7990, 2.373584  
47820, 17764, 949.7371, 2.373429  
47821, 17720, 949.6751, 2.373274  
47822, 17296, 949.6132, 2.373119  
47823, 16648, 949.5513, 2.372965  
47824, 16338, 949.4893, 2.372810  
47825, 16760, 949.4274, 2.372655  
47826, 17732, 949.3655, 2.372500  
47827, 18618, 949.3036, 2.372346  
47828, 18908, 949.2416, 2.372191  
47829, 18626, 949.1797, 2.372036  
47830, 18184, 949.1178, 2.371881  
47831, 17908, 949.0559, 2.371727  
47832, 17808, 948.9939, 2.371572  
47833, 17720, 948.9320, 2.371417  
47834, 17624, 948.8701, 2.371262  
47835, 17652, 948.8082, 2.371108  
47836, 17826, 948.7462, 2.370953  
47837, 17902, 948.6843, 2.370798  
47838, 17616, 948.6224, 2.370643

47839, 16996, 948.5604, 2.370488  
47840, 16400, 948.4985, 2.370334  
47841, 16156, 948.4366, 2.370179  
47842, 16192, 948.3747, 2.370024  
47843, 16114, 948.3127, 2.369869  
47844, 15690, 948.2508, 2.369715  
47845, 15156, 948.1889, 2.369560  
47846, 15008, 948.1270, 2.369405  
47847, 15484, 948.0650, 2.369250  
47848, 16290, 948.0031, 2.369096  
47849, 16916, 947.9412, 2.368941  
47850, 17152, 947.8792, 2.368786  
47851, 17254, 947.8173, 2.368631  
47852, 17580, 947.7554, 2.368477  
47853, 18154, 947.6935, 2.368322  
47854, 18604, 947.6315, 2.368167  
47855, 18574, 947.5696, 2.368012  
47856, 18100, 947.5077, 2.367858  
47857, 17536, 947.4458, 2.367703  
47858, 17200, 947.3838, 2.367548  
47859, 17096, 947.3219, 2.367393  
47860, 17084, 947.2600, 2.367239  
47861, 17114, 947.1981, 2.367084  
47862, 17322, 947.1361, 2.366929  
47863, 17776, 947.0742, 2.366774  
47864, 18284, 947.0123, 2.366620  
47865, 18554, 946.9503, 2.366465  
47866, 18492, 946.8884, 2.366310  
47867, 18332, 946.8265, 2.366155  
47868, 18370, 946.7646, 2.366000  
47869, 18638, 946.7026, 2.365846  
47870, 18844, 946.6407, 2.365691  
47871, 18722, 946.5788, 2.365536  
47872, 18314, 946.5169, 2.365381  
47873, 17904, 946.4549, 2.365227  
47874, 17708, 946.3930, 2.365072  
47875, 17680, 946.3311, 2.364917  
47876, 17698, 946.2691, 2.364762  
47877, 17800, 946.2072, 2.364608  
47878, 18180, 946.1453, 2.364453  
47879, 18886, 946.0834, 2.364298  
47880, 19580, 946.0214, 2.364143  
47881, 19804, 945.9595, 2.363989  
47882, 19414, 945.8976, 2.363834  
47883, 18808, 945.8357, 2.363679  
47884, 18518, 945.7737, 2.363524  
47885, 18676, 945.7118, 2.363370  
47886, 18860, 945.6499, 2.363215  
47887, 18560, 945.5880, 2.363060  
47888, 17774, 945.5260, 2.362905  
47889, 17050, 945.4641, 2.362751  
47890, 16950, 945.4022, 2.362596  
47891, 17462, 945.3402, 2.362441  
47892, 18020, 945.2783, 2.362286  
47893, 18060, 945.2164, 2.362132  
47894, 17570, 945.1545, 2.361977  
47895, 17044, 945.0925, 2.361822  
47896, 16962, 945.0306, 2.361667  
47897, 17376, 944.9687, 2.361513  
47898, 17972, 944.9068, 2.361358  
47899, 18464, 944.8448, 2.361203  
47900, 18832, 944.7829, 2.361048  
47901, 19216, 944.7210, 2.360893  
47902, 19636, 944.6590, 2.360739  
47903, 19898, 944.5971, 2.360584  
47904, 19816, 944.5352, 2.360429  
47905, 19388, 944.4733, 2.360274  
47906, 18832, 944.4113, 2.360120  
47907, 18400, 944.3494, 2.359965  
47908, 18244, 944.2875, 2.359810  
47909, 18428, 944.2256, 2.359655  
47910, 18958, 944.1636, 2.359501  
47911, 19694, 944.1017, 2.359346  
47912, 20322, 944.0398, 2.359191  
47913, 20442, 943.9779, 2.359036  
47914, 19890, 943.9159, 2.358882  
47915, 18906, 943.8540, 2.358727  
47916, 17972, 943.7921, 2.358572  
47917, 17458, 943.7301, 2.358417  
47918, 17334, 943.6682, 2.358263  
47919, 17352, 943.6063, 2.358108  
47920, 17374, 943.5444, 2.357953  
47921, 17558, 943.4824, 2.357798  
47922, 18138, 943.4205, 2.357644  
47923, 19102, 943.3586, 2.357489  
47924, 20094, 943.2967, 2.357334  
47925, 20726, 943.2347, 2.357179  
47926, 20892, 943.1728, 2.357025  
47927, 20796, 943.1109, 2.356870  
47928, 20688, 943.0489, 2.356715  
47929, 20612, 942.9870, 2.356560  
47930, 20434, 942.9251, 2.356406  
47931, 20100, 942.8632, 2.356251  
47932, 19738, 942.8012, 2.356096  
47933, 19554, 942.7393, 2.355941  
47934, 19630, 942.6774, 2.355786  
47935, 19864, 942.6155, 2.355632  
47936, 20108, 942.5535, 2.355477  
47937, 20262, 942.4916, 2.355322  
47938, 20264, 942.4297, 2.355167  
47939, 20020, 942.3678, 2.355013  
47940, 19446, 942.3058, 2.354858  
47941, 18644, 942.2439, 2.354703  
47942, 17910, 942.1820, 2.354548  
47943, 17524, 942.1200, 2.354394  
47944, 17506, 942.0581, 2.354239  
47945, 17612, 941.9962, 2.354084  
47946, 17628, 941.9343, 2.353929  
47947, 17648, 941.8724, 2.353775  
47948, 17918, 941.8104, 2.353620  
47949, 18478, 941.7485, 2.353465  
47950, 18930, 941.6866, 2.353310  
47951, 18736, 941.6246, 2.353156  
47952, 17774, 941.5627, 2.353001  
47953, 16536, 941.5008, 2.352846  
47954, 15730, 941.4388, 2.352691  
47955, 15656, 941.3769, 2.352537  
47956, 16012, 941.3150, 2.352382  
47957, 16314, 941.2531, 2.352227  
47958, 16410, 941.1911, 2.352072  
47959, 16568, 941.1292, 2.351918  
47960, 16996, 941.0673, 2.351763  
47961, 17476, 941.0054, 2.351608  
47962, 17508, 940.9434, 2.351453  
47963, 16884, 940.8815, 2.351299  
47964, 15988, 940.8196, 2.351144  
47965, 15486, 940.7577, 2.350989  
47966, 15672, 940.6957, 2.350834  
47967, 16232, 940.6338, 2.350679  
47968, 16616, 940.5719, 2.350525  
47969, 16640, 940.5099, 2.350370  
47970, 16600, 940.4480, 2.350215  
47971, 16864, 940.3861, 2.350060  
47972, 17430, 940.3242, 2.349906  
47973, 17928, 940.2622, 2.349751  
47974, 18072, 940.2003, 2.349596  
47975, 17930, 940.1384, 2.349441  
47976, 17764, 940.0765, 2.349287  
47977, 17644, 940.0145, 2.349132  
47978, 17368, 939.9526, 2.348977  
47979, 16826, 939.8907, 2.348822  
47980, 16310, 939.8288, 2.348668  
47981, 16344, 939.7668, 2.348513  
47982, 17160, 939.7049, 2.348358  
47983, 18380, 939.6430, 2.348203  
47984, 19320, 939.5810, 2.348049  
47985, 19606, 939.5191, 2.347894  
47986, 19454, 939.4572, 2.347739  
47987, 19320, 939.3953, 2.347584  
47988, 19370, 939.3333, 2.347430  
47989, 19346, 939.2714, 2.347275  
47990, 18978, 939.2095, 2.347120  
47991, 18392, 939.1476, 2.346965  
47992, 18054, 939.0856, 2.346811  
47993, 18258, 939.0237, 2.346656  
47994, 18810, 938.9618, 2.346501  
47995, 19258, 938.8998, 2.346346  
47996, 19352, 938.8379, 2.346192  
47997, 19248, 938.7760, 2.346037  
47998, 19204, 938.7141, 2.345882  
47999, 19200, 938.6521, 2.345727  
48000, 18988, 938.5902, 2.345572  
48001, 18484, 938.5283, 2.345418  
48002, 18042, 938.4664, 2.345263  
48003, 18168, 938.4044, 2.345108  
48004, 18964, 938.3425, 2.344953  
48005, 19952, 938.2806, 2.344799  
48006, 20450, 938.2187, 2.344644  
48007, 20196, 938.1567, 2.344489  
48008, 19506, 938.0948, 2.344334  
48009, 18866, 938.0329, 2.344180  
48010, 18462, 937.9709, 2.344025  
48011, 18140, 937.9090, 2.343870  
48012, 17762, 937.8471, 2.343715  
48013, 17520, 937.7852, 2.343561  
48014, 17730, 937.7232, 2.343406  
48015, 18396, 937.6613, 2.343251  
48016, 19116, 937.5994, 2.343096  
48017, 19446, 937.5375, 2.342942  
48018, 19328, 937.4755, 2.342787  
48019, 19106, 937.4136, 2.342632  
48020, 19098, 937.3517, 2.342477  
48021, 19236, 937.2897, 2.342323  
48022, 19212, 937.2278, 2.342168  
48023, 18900, 937.1659, 2.342013  
48024, 18550, 937.1040, 2.341858  
48025, 18514, 937.0420, 2.341704  
48026, 18794, 936.9801, 2.341549  
48027, 18996, 936.9182, 2.341394  
48028, 18732, 936.8563, 2.341239  
48029, 17998, 936.7943, 2.341085  
48030, 17168, 936.7324, 2.340930  
48031, 16576, 936.6705, 2.340775  
48032, 16252, 936.6086, 2.340620  
48033, 16082, 936.5466, 2.340465  
48034, 16142, 936.4847, 2.340311  
48035, 16688, 936.4228, 2.340156  
48036, 17834, 936.3608, 2.340001  
48037, 19224, 936.2989, 2.339846  
48038, 20226, 936.2370, 2.339692  
48039, 20510, 936.1751, 2.339537  
48040, 20330, 936.1131, 2.339382  
48041, 20252, 936.0512, 2.339227  
48042, 20570, 935.9893, 2.339073  
48043, 21016, 935.9274, 2.338918  
48044, 21096, 935.8654, 2.338763  
48045, 20634, 935.8035, 2.338608  
48046, 19902, 935.7416, 2.338454  
48047, 19280, 935.6796, 2.338299  
48048, 18854, 935.6177, 2.338144  
48049, 18454, 935.5558, 2.337989  
48050, 18036, 935.4939, 2.337835  
48051, 17884, 935.4319, 2.337680  
48052, 18316, 935.3700, 2.337525  
48053, 19246, 935.3081, 2.337370  
48054, 20120, 935.2462, 2.337216  
48055, 20364, 935.1842, 2.337061  
48056, 19916, 935.1223, 2.336906  
48057, 19200, 935.0604, 2.336751  
48058, 18648, 934.9985, 2.336597  
48059, 18276, 934.9365, 2.336442  
48060, 17780, 934.8746, 2.336287  
48061, 16988, 934.8127, 2.336132  
48062, 16122, 934.7507, 2.335978  
48063, 15556, 934.6888, 2.335823  
48064, 15392, 934.6269, 2.335668  
48065, 15390, 934.5650, 2.335513  
48066, 15310, 934.5030, 2.335358



48067, 15246, 934.4411, 2.335204  
48068, 15510, 934.3792, 2.335049  
48069, 16170, 934.3173, 2.334894  
48070, 16846, 934.2553, 2.334739  
48071, 17016, 934.1934, 2.334585  
48072, 16594, 934.1315, 2.334430  
48073, 16078, 934.0695, 2.334275  
48074, 16098, 934.0076, 2.334120  
48075, 16816, 933.9457, 2.333966  
48076, 17766, 933.8838, 2.333811  
48077, 18296, 933.8218, 2.333656  
48078, 18142, 933.7599, 2.333501  
48079, 17558, 933.6980, 2.333347  
48080, 17004, 933.6361, 2.333192  
48081, 16750, 933.5741, 2.333037  
48082, 16810, 933.5122, 2.332882  
48083, 17110, 933.4503, 2.332728  
48084, 17586, 933.3884, 2.332573  
48085, 18142, 933.3264, 2.332418  
48086, 18570, 933.2645, 2.332263  
48087, 18714, 933.2026, 2.332109  
48088, 18662, 933.1406, 2.331954  
48089, 18728, 933.0787, 2.331799  
48090, 19134, 933.0168, 2.331644  
48091, 19728, 932.9549, 2.331490  
48092, 20074, 932.8929, 2.331335  
48093, 19904, 932.8310, 2.331180  
48094, 19450, 932.7691, 2.331025  
48095, 19222, 932.7072, 2.330871  
48096, 19494, 932.6452, 2.330716  
48097, 19998, 932.5833, 2.330561  
48098, 20178, 932.5214, 2.330406  
48099, 19734, 932.4594, 2.330251  
48100, 18900, 932.3975, 2.330097  
48101, 18146, 932.3356, 2.329942  
48102, 17734, 932.2737, 2.329787  
48103, 17562, 932.2117, 2.329632  
48104, 17454, 932.1498, 2.329478  
48105, 17454, 932.0879, 2.329323  
48106, 17788, 932.0260, 2.329168  
48107, 18540, 931.9640, 2.329013  
48108, 19430, 931.9021, 2.328859  
48109, 20054, 931.8402, 2.328704  
48110, 20246, 931.7783, 2.328549  
48111, 20200, 931.7163, 2.328394  
48112, 20202, 931.6544, 2.328240  
48113, 20318, 931.5925, 2.328085  
48114, 20358, 931.5305, 2.327930  
48115, 20166, 931.4686, 2.327775  
48116, 19858, 931.4067, 2.327621  
48117, 19684, 931.3448, 2.327466  
48118, 19774, 931.2828, 2.327311  
48119, 20010, 931.2209, 2.327156  
48120, 20202, 931.1590, 2.327002  
48121, 20320, 931.0971, 2.326847  
48122, 20454, 931.0351, 2.326692  
48123, 20564, 930.9732, 2.326537  
48124, 20402, 930.9113, 2.326383  
48125, 19724, 930.8493, 2.326228  
48126, 18656, 930.7874, 2.326073  
48127, 17698, 930.7255, 2.325918  
48128, 17328, 930.6636, 2.325764  
48129, 17574, 930.6016, 2.325609  
48130, 17966, 930.5397, 2.325454  
48131, 18002, 930.4778, 2.325299  
48132, 17592, 930.4159, 2.325144  
48133, 17078, 930.3539, 2.324990  
48134, 16864, 930.2920, 2.324835  
48135, 17040, 930.2301, 2.324680  
48136, 17404, 930.1682, 2.324525  
48137, 17714, 930.1062, 2.324371  
48138, 17900, 930.0443, 2.324216  
48139, 17992, 929.9824, 2.324061  
48140, 17982, 929.9204, 2.323906  
48141, 17814, 929.8585, 2.323752  
48142, 17544, 929.7966, 2.323597  
48143, 17382, 929.7347, 2.323442  
48144, 17540, 929.6727, 2.323287  
48145, 17962, 929.6108, 2.323133  
48146, 18376, 929.5489, 2.322978  
48147, 18534, 929.4870, 2.322823  
48148, 18466, 929.4250, 2.322668  
48149, 18390, 929.3631, 2.322514  
48150, 18422, 929.3012, 2.322359  
48151, 18402, 929.2392, 2.322204  
48152, 18100, 929.1773, 2.322049  
48153, 17514, 929.1154, 2.321895  
48154, 16952, 929.0535, 2.321740  
48155, 16756, 928.9915, 2.321585  
48156, 16976, 928.9296, 2.321430  
48157, 17348, 928.8677, 2.321276  
48158, 17598, 928.8058, 2.321121  
48159, 17668, 928.7438, 2.320966  
48160, 17660, 928.6819, 2.320811  
48161, 17542, 928.6200, 2.320656  
48162, 17084, 928.5581, 2.320502  
48163, 16136, 928.4961, 2.320347  
48164, 14904, 928.4342, 2.320192  
48165, 13896, 928.3723, 2.320037  
48166, 13510, 928.3103, 2.319883  
48167, 13674, 928.2484, 2.319728  
48168, 13962, 928.1865, 2.319573  
48169, 14072, 928.1246, 2.319418  
48170, 14118, 928.0626, 2.319264  
48171, 14482, 928.0007, 2.319109  
48172, 15326, 927.9388, 2.318954  
48173, 16340, 927.8769, 2.318799  
48174, 16992, 927.8149, 2.318645  
48175, 16984, 927.7530, 2.318490  
48176, 16472, 927.6911, 2.318335  
48177, 15880, 927.6292, 2.318180  
48178, 15494, 927.5672, 2.318026  
48179, 15316, 927.5053, 2.317871  
48180, 15188, 927.4434, 2.317716  
48181, 15014, 927.3814, 2.317561  
48182, 14860, 927.3195, 2.317407  
48183, 14860, 927.2576, 2.317252  
48184, 15100, 927.1957, 2.317097  
48185, 15596, 927.1337, 2.316942  
48186, 16288, 927.0718, 2.316788  
48187, 17010, 927.0099, 2.316633  
48188, 17518, 926.9480, 2.316478  
48189, 17636, 926.8860, 2.316323  
48190, 17420, 926.8241, 2.316169  
48191, 17142, 926.7622, 2.316014  
48192, 17054, 926.7002, 2.315859  
48193, 17106, 926.6383, 2.315704  
48194, 17012, 926.5764, 2.315549  
48195, 16582, 926.5145, 2.315395  
48196, 16032, 926.4525, 2.315240  
48197, 15834, 926.3906, 2.315085  
48198, 16272, 926.3287, 2.314930  
48199, 17096, 926.2668, 2.314776  
48200, 17722, 926.2048, 2.314621  
48201, 17780, 926.1429, 2.314466  
48202, 17438, 926.0810, 2.314311  
48203, 17170, 926.0191, 2.314157  
48204, 17252, 925.9571, 2.314002  
48205, 17576, 925.8952, 2.313847  
48206, 17880, 925.8333, 2.313692  
48207, 18118, 925.7713, 2.313538  
48208, 18460, 925.7094, 2.313383  
48209, 18934, 925.6475, 2.313228  
48210, 19178, 925.5856, 2.313073  
48211, 18754, 925.5236, 2.312919  
48212, 17684, 925.4617, 2.312764  
48213, 16634, 925.3998, 2.312609  
48214, 16416, 925.3379, 2.312454  
48215, 17270, 925.2759, 2.312300  
48216, 18630, 925.2140, 2.312145  
48217, 19668, 925.1521, 2.311990  
48218, 19990, 925.0901, 2.311835  
48219, 19828, 925.0282, 2.311681  
48220, 19582, 924.9663, 2.311526  
48221, 19352, 924.9044, 2.311371  
48222, 18940, 924.8424, 2.311216  
48223, 18310, 924.7805, 2.311062  
48224, 17860, 924.7186, 2.310907  
48225, 18104, 924.6567, 2.310752  
48226, 19112, 924.5947, 2.310597  
48227, 20344, 924.5328, 2.310442  
48228, 21090, 924.4709, 2.310288  
48229, 21094, 924.4090, 2.310133  
48230, 20678, 924.3470, 2.309978  
48231, 20328, 924.2851, 2.309823  
48232, 20208, 924.2232, 2.309669  
48233, 20126, 924.1612, 2.309514  
48234, 19880, 924.0993, 2.309359  
48235, 19512, 924.0374, 2.309204  
48236, 19170, 923.9755, 2.309050  
48237, 18840, 923.9135, 2.308895  
48238, 18330, 923.8516, 2.308740  
48239, 17592, 923.7897, 2.308585  
48240, 16890, 923.7278, 2.308431  
48241, 16584, 923.6658, 2.308276  
48242, 16710, 923.6039, 2.308121  
48243, 16868, 923.5420, 2.307966  
48244, 16662, 923.4800, 2.307812  
48245, 16156, 923.4181, 2.307657  
48246, 15852, 923.3562, 2.307502  
48247, 16134, 923.2943, 2.307347  
48248, 16816, 923.2323, 2.307193  
48249, 17338, 923.1704, 2.307038  
48250, 17424, 923.1085, 2.306883  
48251, 17430, 923.0466, 2.306728  
48252, 17932, 922.9846, 2.306574  
48253, 19032, 922.9227, 2.306419  
48254, 20084, 922.8608, 2.306264  
48255, 20310, 922.7989, 2.306109  
48256, 19592, 922.7369, 2.305955  
48257, 18598, 922.6750, 2.305800  
48258, 18138, 922.6131, 2.305645  
48259, 18346, 922.5511, 2.305490  
48260, 18620, 922.4892, 2.305335  
48261, 18306, 922.4273, 2.305181  
48262, 17340, 922.3654, 2.305026  
48263, 16228, 922.3034, 2.304871  
48264, 15432, 922.2415, 2.304716  
48265, 14966, 922.1796, 2.304562  
48266, 14580, 922.1177, 2.304407  
48267, 14246, 922.0557, 2.304252  
48268, 14306, 921.9938, 2.304097  
48269, 15064, 921.9319, 2.303943  
48270, 16346, 921.8699, 2.303788  
48271, 17576, 921.8080, 2.303633  
48272, 18278, 921.7461, 2.303478  
48273, 18506, 921.6842, 2.303324  
48274, 18640, 921.6222, 2.303169  
48275, 18914, 921.5603, 2.303014  
48276, 19178, 921.4984, 2.302859  
48277, 19204, 921.4365, 2.302705  
48278, 19076, 921.3745, 2.302550  
48279, 19214, 921.3126, 2.302395  
48280, 19900, 921.2507, 2.302240  
48281, 20910, 921.1888, 2.302086  
48282, 21686, 921.1268, 2.301931  
48283, 21876, 921.0649, 2.301776  
48284, 21638, 921.0030, 2.301621  
48285, 21394, 920.9410, 2.301467  
48286, 21338, 920.8791, 2.301312  
48287, 21254, 920.8172, 2.301157  
48288, 20848, 920.7553, 2.301002  
48289, 20130, 920.6933, 2.300848  
48290, 19396, 920.6314, 2.300693  
48291, 18848, 920.5695, 2.300538  
48292, 18346, 920.5076, 2.300383  
48293, 17632, 920.4456, 2.300228  
48294, 16730, 920.3837, 2.300074

48295, 16038, 920.3218, 2.299919  
48296, 15962, 920.2598, 2.299764  
48297, 16456, 920.1979, 2.299609  
48298, 17038, 920.1360, 2.299455  
48299, 17288, 920.0741, 2.299300  
48300, 17212, 920.0121, 2.299145  
48301, 17182, 919.9502, 2.298990  
48302, 17446, 919.8883, 2.298836  
48303, 17862, 919.8264, 2.298681  
48304, 18118, 919.7644, 2.298526  
48305, 18138, 919.7025, 2.298371  
48306, 18184, 919.6406, 2.298217  
48307, 18504, 919.5787, 2.298062  
48308, 19014, 919.5167, 2.297907  
48309, 19356, 919.4548, 2.297752  
48310, 19330, 919.3929, 2.297598  
48311, 19136, 919.3309, 2.297443  
48312, 19154, 919.2690, 2.297288  
48313, 19480, 919.2071, 2.297133  
48314, 19782, 919.1452, 2.296979  
48315, 19670, 919.0832, 2.296824  
48316, 19156, 919.0213, 2.296669  
48317, 18700, 918.9594, 2.296514  
48318, 18754, 918.8975, 2.296360  
48319, 19310, 918.8355, 2.296205  
48320, 19958, 918.7736, 2.296050  
48321, 20280, 918.7117, 2.295895  
48322, 20240, 918.6497, 2.295741  
48323, 20066, 918.5878, 2.295586  
48324, 19944, 918.5259, 2.295431  
48325, 19830, 918.4640, 2.295276  
48326, 19670, 918.4020, 2.295121  
48327, 19580, 918.3401, 2.294967  
48328, 19802, 918.2782, 2.294812  
48329, 20388, 918.2163, 2.294657  
48330, 21010, 918.1543, 2.294502  
48331, 21248, 918.0924, 2.294348  
48332, 20988, 918.0305, 2.294193  
48333, 20566, 917.9686, 2.294038  
48334, 20438, 917.9066, 2.293883  
48335, 20756, 917.8447, 2.293729  
48336, 21234, 917.7828, 2.293574  
48337, 21434, 917.7208, 2.293419  
48338, 21134, 917.6589, 2.293264  
48339, 20430, 917.5970, 2.293110  
48340, 19558, 917.5351, 2.292955  
48341, 18732, 917.4731, 2.292800  
48342, 18158, 917.4112, 2.292645  
48343, 18102, 917.3493, 2.292491  
48344, 18730, 917.2874, 2.292336  
48345, 19882, 917.2254, 2.292181  
48346, 20988, 917.1635, 2.292026  
48347, 21412, 917.1016, 2.291872  
48348, 20936, 917.0396, 2.291717  
48349, 19948, 916.9777, 2.291562  
48350, 19098, 916.9158, 2.291407  
48351, 18780, 916.8539, 2.291253  
48352, 18876, 916.7919, 2.291098  
48353, 19024, 916.7300, 2.290943  
48354, 19020, 916.6681, 2.290788  
48355, 18964, 916.6062, 2.290634  
48356, 19064, 916.5442, 2.290479  
48357, 19354, 916.4823, 2.290324  
48358, 19646, 916.4204, 2.290169  
48359, 19746, 916.3585, 2.290014  
48360, 19580, 916.2965, 2.289860  
48361, 19206, 916.2346, 2.289705  
48362, 18672, 916.1727, 2.289550  
48363, 18018, 916.1107, 2.289395  
48364, 17340, 916.0488, 2.289241  
48365, 16818, 915.9869, 2.289086  
48366, 16578, 915.9250, 2.288931  
48367, 16564, 915.8630, 2.288776  
48368, 16570, 915.8011, 2.288622  
48369, 16472, 915.7392, 2.288467  
48370, 16346, 915.6773, 2.288312  
48371, 16366, 915.6153, 2.288157  
48372, 16566, 915.5534, 2.288003  
48373, 16814, 915.4915, 2.287848  
48374, 16992, 915.4295, 2.287693  
48375, 17226, 915.3676, 2.287538  
48376, 17782, 915.3057, 2.287384  
48377, 18752, 915.2438, 2.287229  
48378, 19836, 915.1818, 2.287074  
48379, 20548, 915.1199, 2.286919  
48380, 20678, 915.0580, 2.286765  
48381, 20488, 914.9961, 2.286610  
48382, 20434, 914.9341, 2.286455  
48383, 20654, 914.8722, 2.286300  
48384, 20828, 914.8103, 2.286146  
48385, 20512, 914.7484, 2.285991  
48386, 19662, 914.6864, 2.285836  
48387, 18702, 914.6245, 2.285681  
48388, 18126, 914.5626, 2.285527  
48389, 18052, 914.5006, 2.285372  
48390, 18196, 914.4387, 2.285217  
48391, 18310, 914.3768, 2.285062  
48392, 18472, 914.3149, 2.284907  
48393, 18992, 914.2529, 2.284753  
48394, 19948, 914.1910, 2.284598  
48395, 21008, 914.1291, 2.284443  
48396, 21676, 914.0672, 2.284288  
48397, 21748, 914.0052, 2.284134  
48398, 21482, 913.9433, 2.283979  
48399, 21298, 913.8814, 2.283824  
48400, 21342, 913.8195, 2.283669  
48401, 21412, 913.7575, 2.283515  
48402, 21198, 913.6956, 2.283360  
48403, 20612, 913.6337, 2.283205  
48404, 19796, 913.5717, 2.283050  
48405, 18960, 913.5098, 2.282896  
48406, 18226, 913.4479, 2.282741  
48407, 17654, 913.3860, 2.282586  
48408, 17360, 913.3240, 2.282431  
48409, 17428, 913.2621, 2.282277  
48410, 17764, 913.2002, 2.282122  
48411, 18060, 913.1383, 2.281967  
48412, 18018, 913.0763, 2.281812  
48413, 17632, 913.0144, 2.281658  
48414, 17214, 912.9525, 2.281503  
48415, 17146, 912.8905, 2.281348  
48416, 17528, 912.8286, 2.281193  
48417, 18152, 912.7667, 2.281039  
48418, 18702, 912.7048, 2.280884  
48419, 18972, 912.6428, 2.280729  
48420, 18910, 912.5809, 2.280574  
48421, 18502, 912.5190, 2.280420  
48422, 17798, 912.4571, 2.280265  
48423, 17010, 912.3951, 2.280110  
48424, 16514, 912.3332, 2.279955  
48425, 16650, 912.2713, 2.279800  
48426, 17374, 912.2094, 2.279646  
48427, 18270, 912.1474, 2.279491  
48428, 18856, 912.0855, 2.279336  
48429, 19012, 912.0236, 2.279181  
48430, 18998, 911.9616, 2.279027  
48431, 19088, 911.8997, 2.278872  
48432, 19222, 911.8378, 2.278717  
48433, 19074, 911.7759, 2.278562  
48434, 18456, 911.7139, 2.278408  
48435, 17640, 911.6520, 2.278253  
48436, 17118, 911.5901, 2.278098  
48437, 17152, 911.5282, 2.277943  
48438, 17508, 911.4662, 2.277789  
48439, 17750, 911.4043, 2.277634  
48440, 17714, 911.3424, 2.277479  
48441, 17678, 911.2804, 2.277324  
48442, 18000, 911.2185, 2.277170  
48443, 18688, 911.1566, 2.277015  
48444, 19364, 911.0947, 2.276860  
48445, 19656, 911.0327, 2.276705  
48446, 19570, 910.9708, 2.276551  
48447, 19408, 910.9089, 2.276396  
48448, 19390, 910.8470, 2.276241  
48449, 19410, 910.7850, 2.276086  
48450, 19202, 910.7231, 2.275932  
48451, 18734, 910.6612, 2.275777  
48452, 18328, 910.5993, 2.275622  
48453, 18332, 910.5373, 2.275467  
48454, 18756, 910.4754, 2.275312  
48455, 19256, 910.4135, 2.275158  
48456, 19414, 910.3515, 2.275003  
48457, 19122, 910.2896, 2.274848  
48458, 18562, 910.2277, 2.274693  
48459, 17976, 910.1658, 2.274539  
48460, 17466, 910.1038, 2.274384  
48461, 17032, 910.0419, 2.274229  
48462, 16716, 909.9800, 2.274074  
48463, 16602, 909.9181, 2.273920  
48464, 16692, 909.8561, 2.273765  
48465, 16842, 909.7942, 2.273610  
48466, 16920, 909.7323, 2.273455  
48467, 17020, 909.6703, 2.273301  
48468, 17398, 909.6084, 2.273146  
48469, 18170, 909.5465, 2.272991  
48470, 19112, 909.4846, 2.272836  
48471, 19780, 909.4226, 2.272682  
48472, 19920, 909.3607, 2.272527  
48473, 19684, 909.2988, 2.272372  
48474, 19464, 909.2369, 2.272217  
48475, 19482, 909.1749, 2.272063  
48476, 19630, 909.1130, 2.271908  
48477, 19682, 909.0511, 2.271753  
48478, 19648, 908.9892, 2.271598  
48479, 19776, 908.9272, 2.271444  
48480, 20224, 908.8653, 2.271289  
48481, 20802, 908.8034, 2.271134  
48482, 21084, 908.7414, 2.270979  
48483, 20848, 908.6795, 2.270825  
48484, 20322, 908.6176, 2.270670  
48485, 19940, 908.5557, 2.270515  
48486, 19906, 908.4937, 2.270360  
48487, 20028, 908.4318, 2.270205  
48488, 19968, 908.3699, 2.270051  
48489, 19642, 908.3080, 2.269896  
48490, 19298, 908.2460, 2.269741  
48491, 19150, 908.1841, 2.269586  
48492, 19096, 908.1222, 2.269432  
48493, 18756, 908.0602, 2.269277  
48494, 17898, 907.9983, 2.269122  
48495, 16744, 907.9364, 2.268967  
48496, 15834, 907.8745, 2.268813  
48497, 15626, 907.8125, 2.268658  
48498, 16192, 907.7506, 2.268503  
48499, 17274, 907.6887, 2.268348  
48500, 18494, 907.6268, 2.268194  
48501, 19554, 907.5648, 2.268039  
48502, 20208, 907.5029, 2.267884  
48503, 20290, 907.4410, 2.267729  
48504, 19810, 907.3791, 2.267575  
48505, 19074, 907.3171, 2.267420  
48506, 18510, 907.2552, 2.267265  
48507, 18370, 907.1933, 2.267110  
48508, 18550, 907.1313, 2.266956  
48509, 18726, 907.0694, 2.266801  
48510, 18734, 907.0075, 2.266646  
48511, 18736, 906.9456, 2.266491  
48512, 19024, 906.8836, 2.266337  
48513, 19662, 906.8217, 2.266182  
48514, 20384, 906.7598, 2.266027  
48515, 20822, 906.6979, 2.265872  
48516, 20862, 906.6359, 2.265718  
48517, 20680, 906.5740, 2.265563  
48518, 20496, 906.5121, 2.265408  
48519, 20328, 906.4501, 2.265253  
48520, 20050, 906.3882, 2.265098  
48521, 19624, 906.3263, 2.264944  
48522, 19192, 906.2644, 2.264789

48523, 18940, 906.2024, 2.264634  
48524, 18860, 906.1405, 2.264479  
48525, 18790, 906.0786, 2.264325  
48526, 18622, 906.0167, 2.264170  
48527, 18478, 905.9547, 2.264015  
48528, 18570, 905.8928, 2.263860  
48529, 18924, 905.8309, 2.263706  
48530, 19270, 905.7690, 2.263551  
48531, 19330, 905.7070, 2.263396  
48532, 19082, 905.6451, 2.263241  
48533, 18788, 905.5832, 2.263087  
48534, 18674, 905.5212, 2.262932  
48535, 18672, 905.4593, 2.262777  
48536, 18514, 905.3974, 2.262622  
48537, 18082, 905.3355, 2.262468  
48538, 17586, 905.2735, 2.262313  
48539, 17368, 905.2116, 2.262158  
48540, 17598, 905.1497, 2.262003  
48541, 18106, 905.0878, 2.261849  
48542, 18654, 905.0258, 2.261694  
48543, 19128, 904.9639, 2.261539  
48544, 19548, 904.9020, 2.261384  
48545, 19822, 904.8400, 2.261230  
48546, 19684, 904.7781, 2.261075  
48547, 18976, 904.7162, 2.260920  
48548, 17946, 904.6543, 2.260765  
48549, 17216, 904.5923, 2.260611  
48550, 17282, 904.5304, 2.260456  
48551, 18072, 904.4685, 2.260301  
48552, 19054, 904.4066, 2.260146  
48553, 19730, 904.3446, 2.259991  
48554, 20056, 904.2827, 2.259837  
48555, 20304, 904.2208, 2.259682  
48556, 20618, 904.1589, 2.259527  
48557, 20772, 904.0969, 2.259372  
48558, 20470, 904.0350, 2.259218  
48559, 19824, 903.9731, 2.259063  
48560, 19340, 903.9111, 2.258908  
48561, 19454, 903.8492, 2.258753  
48562, 19962, 903.7873, 2.258599  
48563, 20152, 903.7254, 2.258444  
48564, 19462, 903.6634, 2.258289  
48565, 18022, 903.6015, 2.258134  
48566, 16594, 903.5396, 2.257980  
48567, 15884, 903.4777, 2.257825  
48568, 16034, 903.4157, 2.257670  
48569, 16684, 903.3538, 2.257515  
48570, 17484, 903.2919, 2.257361  
48571, 18370, 903.2299, 2.257206  
48572, 19418, 903.1680, 2.257051  
48573, 20486, 903.1061, 2.256896  
48574, 21214, 903.0442, 2.256742  
48575, 21370, 902.9822, 2.256587  
48576, 21144, 902.9203, 2.256432  
48577, 21004, 902.8584, 2.256277  
48578, 21222, 902.7965, 2.256123  
48579, 21604, 902.7345, 2.255968  
48580, 21736, 902.6726, 2.255813  
48581, 21428, 902.6107, 2.255658  
48582, 20932, 902.5488, 2.255504  
48583, 20644, 902.4868, 2.255349  
48584, 20708, 902.4249, 2.255194  
48585, 20964, 902.3630, 2.255039  
48586, 21188, 902.3010, 2.254884  
48587, 21372, 902.2391, 2.254730  
48588, 21622, 902.1772, 2.254575  
48589, 21890, 902.1153, 2.254420  
48590, 21866, 902.0533, 2.254265  
48591, 21282, 901.9914, 2.254111  
48592, 20236, 901.9295, 2.253956  
48593, 19230, 901.8676, 2.253801  
48594, 18726, 901.8056, 2.253646  
48595, 18776, 901.7437, 2.253492  
48596, 19008, 901.6818, 2.253337  
48597, 19034, 901.6198, 2.253182  
48598, 18802, 901.5579, 2.253027

48599, 18600, 901.4960, 2.252873  
48600, 18706, 901.4341, 2.252718  
48601, 19102, 901.3721, 2.252563  
48602, 19514, 901.3102, 2.252408  
48603, 19662, 901.2483, 2.252254  
48604, 19462, 901.1864, 2.252099  
48605, 19054, 901.1244, 2.251944  
48606, 18648, 901.0625, 2.251789  
48607, 18426, 901.0006, 2.251635  
48608, 18428, 900.9387, 2.251480  
48609, 18544, 900.8767, 2.251325  
48610, 18550, 900.8148, 2.251170  
48611, 18266, 900.7529, 2.251016  
48612, 17748, 900.6909, 2.250861  
48613, 17370, 900.6290, 2.250706  
48614, 17536, 900.5671, 2.250551  
48615, 18342, 900.5052, 2.250397  
48616, 19380, 900.4432, 2.250242  
48617, 20038, 900.3813, 2.250087  
48618, 19988, 900.3194, 2.249932  
48619, 19434, 900.2575, 2.249777  
48620, 18892, 900.1955, 2.249623  
48621, 18696, 900.1336, 2.249468  
48622, 18772, 900.0717, 2.249313  
48623, 18830, 900.0098, 2.249158  
48624, 18722, 899.9478, 2.249004  
48625, 18546, 899.8859, 2.248849  
48626, 18458, 899.8240, 2.248694  
48627, 18390, 899.7620, 2.248539  
48628, 18152, 899.7001, 2.248385  
48629, 17686, 899.6382, 2.248230  
48630, 17222, 899.5763, 2.248075  
48631, 17086, 899.5143, 2.247920  
48632, 17380, 899.4524, 2.247766  
48633, 17886, 899.3905, 2.247611  
48634, 18326, 899.3286, 2.247456  
48635, 18642, 899.2666, 2.247301  
48636, 18974, 899.2047, 2.247147  
48637, 19388, 899.1428, 2.246992  
48638, 19724, 899.0808, 2.246837  
48639, 19762, 899.0189, 2.246682  
48640, 19528, 898.9570, 2.246528  
48641, 19372, 898.8951, 2.246373  
48642, 19638, 898.8331, 2.246218  
48643, 20298, 898.7712, 2.246063  
48644, 20928, 898.7093, 2.245909  
48645, 21076, 898.6474, 2.245754  
48646, 20606, 898.5854, 2.245599  
48647, 19722, 898.5235, 2.245444  
48648, 18690, 898.4616, 2.245290  
48649, 17656, 898.3997, 2.245135  
48650, 16786, 898.3377, 2.244980  
48651, 16390, 898.2758, 2.244825  
48652, 16796, 898.2139, 2.244670  
48653, 18012, 898.1519, 2.244516  
48654, 19506, 898.0900, 2.244361  
48655, 20526, 898.0281, 2.244206  
48656, 20706, 897.9662, 2.244051  
48657, 20344, 897.9042, 2.243897  
48658, 20046, 897.8423, 2.243742  
48659, 20114, 897.7804, 2.243587  
48660, 20288, 897.7185, 2.243432  
48661, 20104, 897.6565, 2.243278  
48662, 19498, 897.5946, 2.243123  
48663, 18958, 897.5327, 2.242968  
48664, 19078, 897.4707, 2.242813  
48665, 19988, 897.4088, 2.242659  
48666, 21224, 897.3469, 2.242504  
48667, 22140, 897.2850, 2.242349  
48668, 22424, 897.2230, 2.242194  
48669, 22182, 897.1611, 2.242040  
48670, 21724, 897.0992, 2.241885  
48671, 21284, 897.0373, 2.241730  
48672, 20988, 896.9753, 2.241575  
48673, 20936, 896.9134, 2.241421  
48674, 21182, 896.8515, 2.241266

48675, 21576, 896.7896, 2.241111  
48676, 21774, 896.7276, 2.240956  
48677, 21480, 896.6657, 2.240802  
48678, 20806, 896.6038, 2.240647  
48679, 20234, 896.5418, 2.240492  
48680, 20236, 896.4799, 2.240337  
48681, 20872, 896.4180, 2.240183  
48682, 21776, 896.3561, 2.240028  
48683, 22518, 896.2941, 2.239873  
48684, 22972, 896.2322, 2.239718  
48685, 23282, 896.1703, 2.239563  
48686, 23518, 896.1084, 2.239409  
48687, 23518, 896.0464, 2.239254  
48688, 23040, 895.9845, 2.239099  
48689, 22100, 895.9226, 2.238944  
48690, 20998, 895.8606, 2.238790  
48691, 20092, 895.7987, 2.238635  
48692, 19466, 895.7368, 2.238480  
48693, 18970, 895.6749, 2.238325  
48694, 18472, 895.6129, 2.238171  
48695, 18014, 895.5510, 2.238016  
48696, 17666, 895.4891, 2.237861  
48697, 17332, 895.4272, 2.237706  
48698, 16790, 895.3652, 2.237552  
48699, 16024, 895.3033, 2.237397  
48700, 15420, 895.2414, 2.237242  
48701, 15444, 895.1795, 2.237087  
48702, 16164, 895.1175, 2.236933  
48703, 17038, 895.0556, 2.236778  
48704, 17356, 894.9937, 2.236623  
48705, 16928, 894.9317, 2.236468  
48706, 16310, 894.8698, 2.236314  
48707, 16274, 894.8079, 2.236159  
48708, 17100, 894.7460, 2.236004  
48709, 18348, 894.6840, 2.235849  
48710, 19292, 894.6221, 2.235695  
48711, 19600, 894.5602, 2.235540  
48712, 19534, 894.4983, 2.235385  
48713, 19560, 894.4363, 2.235230  
48714, 19872, 894.3744, 2.235076  
48715, 20318, 894.3125, 2.234921  
48716, 20706, 894.2505, 2.234766  
48717, 21034, 894.1886, 2.234611  
48718, 21378, 894.1267, 2.234456  
48719, 21638, 894.0648, 2.234302  
48720, 21516, 894.0028, 2.234147  
48721, 20822, 893.9409, 2.233992  
48722, 19746, 893.8790, 2.233837  
48723, 18764, 893.8171, 2.233683  
48724, 18248, 893.7551, 2.233528  
48725, 18174, 893.6932, 2.233373  
48726, 18268, 893.6313, 2.233218  
48727, 18324, 893.5694, 2.233064  
48728, 18374, 893.5074, 2.232909  
48729, 18520, 893.4455, 2.232754  
48730, 18696, 893.3836, 2.232599  
48731, 18696, 893.3216, 2.232445  
48732, 18424, 893.2597, 2.232290  
48733, 18058, 893.1978, 2.232135  
48734, 17876, 893.1359, 2.231980  
48735, 17982, 893.0739, 2.231826  
48736, 18224, 893.0120, 2.231671  
48737, 18398, 892.9501, 2.231516  
48738, 18522, 892.8882, 2.231361  
48739, 18764, 892.8262, 2.231207  
48740, 19152, 892.7643, 2.231052  
48741, 19446, 892.7024, 2.230897  
48742, 19346, 892.6404, 2.230742  
48743, 18862, 892.5785, 2.230588  
48744, 18376, 892.5166, 2.230433  
48745, 18312, 892.4547, 2.230278  
48746, 18734, 892.3927, 2.230123  
48747, 19334, 892.3308, 2.229968  
48748, 19774, 892.2689, 2.229814  
48749, 20004, 892.2070, 2.229659  
48750, 20184, 892.1450, 2.229504

48751, 20352, 892.0831, 2.229349  
48752, 20284, 892.0212, 2.229195  
48753, 19750, 891.9593, 2.229040  
48754, 18876, 891.8973, 2.228885  
48755, 18156, 891.8354, 2.228730  
48756, 18022, 891.7735, 2.228576  
48757, 18432, 891.7115, 2.228421  
48758, 18918, 891.6496, 2.228266  
48759, 19062, 891.5877, 2.228111  
48760, 18848, 891.5258, 2.227957  
48761, 18592, 891.4638, 2.227802  
48762, 18556, 891.4019, 2.227647  
48763, 18682, 891.3400, 2.227492  
48764, 18818, 891.2781, 2.227338  
48765, 18986, 891.2161, 2.227183  
48766, 19432, 891.1542, 2.227028  
48767, 20314, 891.0923, 2.226873  
48768, 21422, 891.0303, 2.226719  
48769, 22278, 890.9684, 2.226564  
48770, 22584, 890.9065, 2.226409  
48771, 22452, 890.8446, 2.226254  
48772, 22216, 890.7826, 2.226100  
48773, 22100, 890.7207, 2.225945  
48774, 22020, 890.6588, 2.225790  
48775, 21824, 890.5969, 2.225635  
48776, 21540, 890.5349, 2.225481  
48777, 21354, 890.4730, 2.225326  
48778, 21330, 890.4111, 2.225171  
48779, 21232, 890.3492, 2.225016  
48780, 20734, 890.2872, 2.224861  
48781, 19802, 890.2253, 2.224707  
48782, 18818, 890.1634, 2.224552  
48783, 18266, 890.1014, 2.224397  
48784, 18312, 890.0395, 2.224242  
48785, 18734, 889.9776, 2.224088  
48786, 19212, 889.9157, 2.223933  
48787, 19664, 889.8537, 2.223778  
48788, 20228, 889.7918, 2.223623  
48789, 20952, 889.7299, 2.223469  
48790, 21636, 889.6680, 2.223314  
48791, 21976, 889.6060, 2.223159  
48792, 21914, 889.5441, 2.223004  
48793, 21708, 889.4822, 2.222850  
48794, 21670, 889.4202, 2.222695  
48795, 21830, 889.3583, 2.222540  
48796, 21918, 889.2964, 2.222385  
48797, 21658, 889.2345, 2.222231  
48798, 21074, 889.1725, 2.222076  
48799, 20430, 889.1106, 2.221921  
48800, 20002, 889.0487, 2.221766  
48801, 19856, 888.9868, 2.221612  
48802, 19900, 888.9248, 2.221457  
48803, 20044, 888.8629, 2.221302  
48804, 20218, 888.8010, 2.221147  
48805, 20336, 888.7391, 2.220993  
48806, 20278, 888.6771, 2.220838  
48807, 20044, 888.6152, 2.220683  
48808, 19812, 888.5533, 2.220528  
48809, 19828, 888.4913, 2.220374  
48810, 20066, 888.4294, 2.220219  
48811, 20148, 888.3675, 2.220064  
48812, 19624, 888.3056, 2.219909  
48813, 18488, 888.2436, 2.219754  
48814, 17302, 888.1817, 2.219600  
48815, 16790, 888.1198, 2.219445  
48816, 17256, 888.0579, 2.219290  
48817, 18326, 887.9959, 2.219135  
48818, 19318, 887.9340, 2.218981  
48819, 19838, 887.8721, 2.218826  
48820, 19972, 887.8102, 2.218671  
48821, 20046, 887.7482, 2.218516  
48822, 20216, 887.6863, 2.218362  
48823, 20366, 887.6244, 2.218207  
48824, 20362, 887.5624, 2.218052  
48825, 20258, 887.5005, 2.217897  
48826, 20230, 887.4386, 2.217743  
48827, 20338, 887.3767, 2.217588  
48828, 20416, 887.3147, 2.217433  
48829, 20310, 887.2528, 2.217278  
48830, 20016, 887.1909, 2.217124  
48831, 19682, 887.1290, 2.216969  
48832, 19356, 887.0670, 2.216814  
48833, 18900, 887.0051, 2.216659  
48834, 18220, 886.9432, 2.216505  
48835, 17506, 886.8812, 2.216350  
48836, 17214, 886.8193, 2.216195  
48837, 17656, 886.7574, 2.216040  
48838, 18678, 886.6955, 2.215886  
48839, 19758, 886.6335, 2.215731  
48840, 20464, 886.5716, 2.215576  
48841, 20756, 886.5097, 2.215421  
48842, 20892, 886.4478, 2.215267  
48843, 21008, 886.3858, 2.215112  
48844, 20962, 886.3239, 2.214957  
48845, 20578, 886.2620, 2.214802  
48846, 19546, 886.2001, 2.214647  
48847, 19498, 886.1381, 2.214493  
48848, 19450, 886.0762, 2.214338  
48849, 19620, 886.0143, 2.214183  
48850, 19546, 885.9523, 2.214028  
48851, 18944, 885.8904, 2.213874  
48852, 18044, 885.8285, 2.213719  
48853, 17346, 885.7666, 2.213564  
48854, 17140, 885.7046, 2.213409  
48855, 17284, 885.6427, 2.213255  
48856, 17468, 885.5808, 2.213100  
48857, 17588, 885.5189, 2.212945  
48858, 17804, 885.4569, 2.212790  
48859, 18210, 885.3950, 2.212636  
48860, 18600, 885.3331, 2.212481  
48861, 18628, 885.2711, 2.212326  
48862, 18226, 885.2092, 2.212171  
48863, 17740, 885.1473, 2.212017  
48864, 17606, 885.0854, 2.211862  
48865, 17886, 885.0234, 2.211707  
48866, 18190, 884.9615, 2.211552  
48867, 18126, 884.8996, 2.211398  
48868, 17762, 884.8377, 2.211243  
48869, 17598, 884.7757, 2.211088  
48870, 18024, 884.7138, 2.210933  
48871, 18920, 884.6519, 2.210779  
48872, 19718, 884.5900, 2.210624  
48873, 19930, 884.5280, 2.210469  
48874, 19514, 884.4661, 2.210314  
48875, 18800, 884.4042, 2.210160  
48876, 18140, 884.3422, 2.210005  
48877, 17672, 884.2803, 2.209850  
48878, 17414, 884.2184, 2.209695  
48879, 17416, 884.1565, 2.209540  
48880, 17738, 884.0945, 2.209386  
48881, 18294, 884.0326, 2.209231  
48882, 18818, 883.9707, 2.209076  
48883, 19098, 883.9088, 2.208921  
48884, 19222, 883.8468, 2.208767  
48885, 19516, 883.7849, 2.208612  
48886, 20208, 883.7230, 2.208457  
48887, 21180, 883.6610, 2.208302  
48888, 22072, 883.5991, 2.208148  
48889, 22628, 883.5372, 2.207993  
48890, 22840, 883.4753, 2.207838  
48891, 22790, 883.4133, 2.207683  
48892, 22432, 883.3514, 2.207529  
48893, 21600, 883.2895, 2.207374  
48894, 20344, 883.2276, 2.207219  
48895, 19074, 883.1656, 2.207064  
48896, 18316, 883.1037, 2.206910  
48897, 18238, 883.0418, 2.206755  
48898, 18504, 882.9799, 2.206600  
48899, 18630, 882.9179, 2.206445  
48900, 18520, 882.8560, 2.206291  
48901, 18530, 882.7941, 2.206136  
48902, 19044, 882.7321, 2.205981  
48903, 19978, 882.6702, 2.205826  
48904, 20824, 882.6083, 2.205672  
48905, 21112, 882.5464, 2.205517  
48906, 20860, 882.4844, 2.205362  
48907, 20440, 882.4225, 2.205207  
48908, 20110, 882.3606, 2.205053  
48909, 19764, 882.2987, 2.204898  
48910, 19176, 882.2367, 2.204743  
48911, 18416, 882.1748, 2.204588  
48912, 17896, 882.1129, 2.204433  
48913, 17932, 882.0509, 2.204279  
48914, 18372, 881.9890, 2.204124  
48915, 18740, 881.9271, 2.203969  
48916, 18746, 881.8652, 2.203814  
48917, 18658, 881.8032, 2.203660  
48918, 18970, 881.7413, 2.203505  
48919, 19808, 881.6794, 2.203350  
48920, 20706, 881.6175, 2.203195  
48921, 21028, 881.5555, 2.203041  
48922, 20634, 881.4936, 2.202886  
48923, 20012, 881.4317, 2.202731  
48924, 19756, 881.3698, 2.202576  
48925, 19960, 881.3078, 2.202422  
48926, 20158, 881.2459, 2.202267  
48927, 19858, 881.1840, 2.202112  
48928, 19032, 881.1220, 2.201957  
48929, 18130, 881.0601, 2.201803  
48930, 17594, 880.9982, 2.201648  
48931, 17470, 880.9363, 2.201493  
48932, 17528, 880.8743, 2.201338  
48933, 17614, 880.8124, 2.201184  
48934, 17794, 880.7505, 2.201029  
48935, 18218, 880.6886, 2.200874  
48936, 18828, 880.6266, 2.200719  
48937, 19414, 880.5647, 2.200565  
48938, 19830, 880.5028, 2.200410  
48939, 20132, 880.4408, 2.200255  
48940, 20408, 880.3789, 2.200100  
48941, 20544, 880.3170, 2.199946  
48942, 20280, 880.2551, 2.199791  
48943, 19554, 880.1931, 2.199636  
48944, 18680, 880.1312, 2.199481  
48945, 18176, 880.0693, 2.199326  
48946, 18282, 880.0074, 2.199172  
48947, 18752, 879.9454, 2.199017  
48948, 19162, 879.8835, 2.198862  
48949, 19342, 879.8216, 2.198707  
48950, 19536, 879.7597, 2.198553  
48951, 20006, 879.6977, 2.198398  
48952, 20650, 879.6358, 2.198243  
48953, 20992, 879.5739, 2.198088  
48954, 20658, 879.5119, 2.197934  
48955, 19758, 879.4500, 2.197779  
48956, 18818, 879.3881, 2.197624  
48957, 18280, 879.3262, 2.197469  
48958, 18210, 879.2642, 2.197315  
48959, 18338, 879.2023, 2.197160  
48960, 18474, 879.1404, 2.197005  
48961, 18612, 879.0785, 2.196850  
48962, 18790, 879.0165, 2.196696  
48963, 18860, 878.9546, 2.196541  
48964, 18580, 878.8927, 2.196386  
48965, 17936, 878.8307, 2.196231  
48966, 17260, 878.7688, 2.196077  
48967, 17004, 878.7069, 2.195922  
48968, 17294, 878.6450, 2.195767  
48969, 17820, 878.5830, 2.195612  
48970, 18154, 878.5211, 2.195458  
48971, 18184, 878.4592, 2.195303  
48972, 18166, 878.3973, 2.195148  
48973, 18386, 878.3353, 2.194993  
48974, 18810, 878.2734, 2.194839  
48975, 19126, 878.2115, 2.194684  
48976, 19096, 878.1496, 2.194529  
48977, 18832, 878.0876, 2.194374  
48978, 18660, 878.0257, 2.194219

48979, 18808, 877.9638, 2.194065  
48980, 19204, 877.9018, 2.193910  
48981, 19634, 877.8399, 2.193755  
48982, 19974, 877.7780, 2.193600  
48983, 20240, 877.7161, 2.193446  
48984, 20452, 877.6541, 2.193291  
48985, 20500, 877.5922, 2.193136  
48986, 20278, 877.5303, 2.192981  
48987, 19872, 877.4684, 2.192827  
48988, 19574, 877.4064, 2.192672  
48989, 19664, 877.3445, 2.192517  
48990, 20138, 877.2826, 2.192362  
48991, 20750, 877.2206, 2.192208  
48992, 21212, 877.1587, 2.192053  
48993, 21400, 877.0968, 2.191898  
48994, 21332, 877.0349, 2.191743  
48995, 21044, 876.9729, 2.191589  
48996, 20566, 876.9110, 2.191434  
48997, 20048, 876.8491, 2.191279  
48998, 19764, 876.7872, 2.191124  
48999, 19936, 876.7252, 2.190970  
49000, 20442, 876.6633, 2.190815  
49001, 20862, 876.6014, 2.190660  
49002, 20824, 876.5395, 2.190505  
49003, 20380, 876.4775, 2.190351  
49004, 19970, 876.4156, 2.190196  
49005, 19986, 876.3537, 2.190041  
49006, 20348, 876.2917, 2.189886  
49007, 20576, 876.2298, 2.189732  
49008, 20282, 876.1679, 2.189577  
49009, 19598, 876.1060, 2.189422  
49010, 19072, 876.0440, 2.189267  
49011, 19160, 875.9821, 2.189112  
49012, 19814, 875.9202, 2.188958  
49013, 20574, 875.8583, 2.188803  
49014, 20988, 875.7963, 2.188648  
49015, 20964, 875.7344, 2.188493  
49016, 20682, 875.6725, 2.188339  
49017, 20352, 875.6105, 2.188184  
49018, 20038, 875.5486, 2.188029  
49019, 19722, 875.4867, 2.187874  
49020, 19430, 875.4248, 2.187720  
49021, 19194, 875.3628, 2.187565  
49022, 18974, 875.3009, 2.187410  
49023, 18678, 875.2390, 2.187255  
49024, 18326, 875.1771, 2.187101  
49025, 18178, 875.1151, 2.186946  
49026, 18522, 875.0532, 2.186791  
49027, 19400, 874.9913, 2.186636  
49028, 20438, 874.9294, 2.186482  
49029, 21102, 874.8674, 2.186327  
49030, 21112, 874.8055, 2.186172  
49031, 20610, 874.7436, 2.186017  
49032, 19990, 874.6816, 2.185863  
49033, 19556, 874.6197, 2.185708  
49034, 19360, 874.5578, 2.185553  
49035, 19346, 874.4959, 2.185398  
49036, 19490, 874.4339, 2.185244  
49037, 19810, 874.3720, 2.185089  
49038, 20216, 874.3101, 2.184934  
49039, 20492, 874.2482, 2.184779  
49040, 20458, 874.1862, 2.184624  
49041, 20154, 874.1243, 2.184470  
49042, 19762, 874.0624, 2.184315  
49043, 19422, 874.0005, 2.184160  
49044, 19094, 873.9385, 2.184005  
49045, 18704, 873.8766, 2.183851  
49046, 18370, 873.8147, 2.183696  
49047, 18400, 873.7527, 2.183541  
49048, 18966, 873.6908, 2.183386  
49049, 19826, 873.6289, 2.183232  
49050, 20440, 873.5670, 2.183077  
49051, 20426, 873.5050, 2.182922  
49052, 19908, 873.4431, 2.182767  
49053, 19374, 873.3812, 2.182613  
49054, 19186, 873.3193, 2.182458

49055, 19294, 873.2573, 2.182303  
49056, 19356, 873.1954, 2.182148  
49057, 19204, 873.1335, 2.181994  
49058, 18996, 873.0715, 2.181839  
49059, 18974, 873.0096, 2.181684  
49060, 19146, 872.9477, 2.181529  
49061, 19232, 872.8858, 2.181375  
49062, 19008, 872.8238, 2.181220  
49063, 18616, 872.7619, 2.181065  
49064, 18464, 872.7000, 2.180910  
49065, 18800, 872.6381, 2.180756  
49066, 19488, 872.5761, 2.180601  
49067, 20170, 872.5142, 2.180446  
49068, 20624, 872.4523, 2.180291  
49069, 20900, 872.3904, 2.180137  
49070, 21114, 872.3284, 2.179982  
49071, 21164, 872.2665, 2.179827  
49072, 20810, 872.2046, 2.179672  
49073, 20014, 872.1426, 2.179517  
49074, 19152, 872.0807, 2.179363  
49075, 18772, 872.0188, 2.179208  
49076, 19120, 871.9569, 2.179053  
49077, 19892, 871.8949, 2.178898  
49078, 20516, 871.8330, 2.178744  
49079, 20640, 871.7711, 2.178589  
49080, 20402, 871.7092, 2.178434  
49081, 20190, 871.6472, 2.178279  
49082, 20258, 871.5853, 2.178125  
49083, 20544, 871.5234, 2.177970  
49084, 20822, 871.4614, 2.177815  
49085, 20940, 871.3995, 2.177660  
49086, 20852, 871.3376, 2.177506  
49087, 20570, 871.2757, 2.177351  
49088, 20098, 871.2137, 2.177196  
49089, 19504, 871.1518, 2.177041  
49090, 18966, 871.0899, 2.176887  
49091, 18650, 871.0280, 2.176732  
49092, 18540, 870.9660, 2.176577  
49093, 18454, 870.9041, 2.176422  
49094, 18268, 870.8422, 2.176268  
49095, 18086, 870.7803, 2.176113  
49096, 18166, 870.7183, 2.175958  
49097, 18590, 870.6564, 2.175803  
49098, 19078, 870.5945, 2.175649  
49099, 19218, 870.5325, 2.175494  
49100, 18876, 870.4706, 2.175339  
49101, 18368, 870.4087, 2.175184  
49102, 18180, 870.3468, 2.175030  
49103, 18520, 870.2848, 2.174875  
49104, 19176, 870.2229, 2.174720  
49105, 19844, 870.1610, 2.174565  
49106, 20438, 870.0991, 2.174410  
49107, 21138, 870.0371, 2.174256  
49108, 22028, 869.9752, 2.174101  
49109, 22862, 869.9133, 2.173946  
49110, 23252, 869.8513, 2.173791  
49111, 23028, 869.7894, 2.173637  
49112, 22434, 869.7275, 2.173482  
49113, 21860, 869.6656, 2.173327  
49114, 21464, 869.6036, 2.173172  
49115, 21104, 869.5417, 2.173018  
49116, 20618, 869.4798, 2.172863  
49117, 20158, 869.4179, 2.172708  
49118, 20042, 869.3559, 2.172553  
49119, 20380, 869.2940, 2.172399  
49120, 20838, 869.2321, 2.172244  
49121, 20930, 869.1702, 2.172089  
49122, 20486, 869.1082, 2.171934  
49123, 19814, 869.0463, 2.171780  
49124, 19400, 868.9844, 2.171625  
49125, 19394, 868.9224, 2.171470  
49126, 19528, 868.8605, 2.171315  
49127, 19440, 868.7986, 2.171161  
49128, 19072, 868.7367, 2.171006  
49129, 18642, 868.6747, 2.170851  
49130, 18362, 868.6128, 2.170696

49131, 18210, 868.5509, 2.170542  
49132, 18074, 868.4890, 2.170387  
49133, 17988, 868.4270, 2.170232  
49134, 18156, 868.3651, 2.170077  
49135, 18630, 868.3032, 2.169923  
49136, 19098, 868.2412, 2.169768  
49137, 19122, 868.1793, 2.169613  
49138, 18604, 868.1174, 2.169458  
49139, 18018, 868.0555, 2.169303  
49140, 18010, 867.9935, 2.169149  
49141, 18776, 867.9316, 2.168994  
49142, 19824, 867.8697, 2.168839  
49143, 20428, 867.8078, 2.168684  
49144, 20302, 867.7458, 2.168530  
49145, 19824, 867.6839, 2.168375  
49146, 19612, 867.6220, 2.168220  
49147, 19902, 867.5601, 2.168065  
49148, 20380, 867.4981, 2.167911  
49149, 20562, 867.4362, 2.167756  
49150, 20302, 867.3743, 2.167601  
49151, 19850, 867.3123, 2.167446  
49152, 19550, 867.2504, 2.167292  
49153, 19498, 867.1885, 2.167137  
49154, 19584, 867.1266, 2.166982  
49155, 19708, 867.0646, 2.166827  
49156, 19918, 867.0027, 2.166673  
49157, 20254, 866.9408, 2.166518  
49158, 20562, 866.8789, 2.166363  
49159, 20562, 866.8169, 2.166208  
49160, 20114, 866.7550, 2.166054  
49161, 19400, 866.6931, 2.165899  
49162, 18818, 866.6311, 2.165744  
49163, 18642, 866.5692, 2.165589  
49164, 18872, 866.5073, 2.165435  
49165, 19318, 866.4454, 2.165280  
49166, 19834, 866.3834, 2.165125  
49167, 20366, 866.3215, 2.164970  
49168, 20854, 866.2596, 2.164816  
49169, 21182, 866.1977, 2.164661  
49170, 21254, 866.1357, 2.164506  
49171, 21158, 866.0738, 2.164351  
49172, 21134, 866.0119, 2.164196  
49173, 21382, 865.9500, 2.164042  
49174, 21844, 865.8880, 2.163887  
49175, 22304, 865.8261, 2.163732  
49176, 22628, 865.7642, 2.163577  
49177, 22886, 865.7022, 2.163423  
49178, 23244, 865.6403, 2.163268  
49179, 23696, 865.5784, 2.163113  
49180, 24002, 865.5165, 2.162958  
49181, 23908, 865.4545, 2.162804  
49182, 23398, 865.3926, 2.162649  
49183, 22736, 865.3307, 2.162494  
49184, 22238, 865.2688, 2.162339  
49185, 22018, 865.2068, 2.162185  
49186, 21980, 865.1449, 2.162030  
49187, 21994, 865.0830, 2.161875  
49188, 22028, 865.0210, 2.161720  
49189, 22098, 864.9591, 2.161566  
49190, 22186, 864.8972, 2.161411  
49191, 22236, 864.8353, 2.161256  
49192, 22238, 864.7733, 2.161101  
49193, 22242, 864.7114, 2.160947  
49194, 22246, 864.6495, 2.160792  
49195, 22098, 864.5876, 2.160637  
49196, 21616, 864.5256, 2.160482  
49197, 20632, 864.4637, 2.160328  
49198, 20108, 864.4018, 2.160173  
49199, 19884, 864.3399, 2.160018  
49200, 20282, 864.2779, 2.159863  
49201, 20926, 864.2160, 2.159709  
49202, 21272, 864.1541, 2.159554  
49203, 21064, 864.0921, 2.159399  
49204, 20540, 864.0302, 2.159244  
49205, 20154, 863.9683, 2.159089  
49206, 20124, 863.9064, 2.158935

49207, 20292, 863.8444, 2.158780  
49208, 20372, 863.7825, 2.158625  
49209, 20278, 863.7206, 2.158470  
49210, 20184, 863.6587, 2.158316  
49211, 20236, 863.5967, 2.158161  
49212, 20394, 863.5348, 2.158006  
49213, 20502, 863.4729, 2.157851  
49214, 20576, 863.4109, 2.157697  
49215, 20868, 863.3490, 2.157542  
49216, 21574, 863.2871, 2.157387  
49217, 22548, 863.2252, 2.157232  
49218, 23320, 863.1632, 2.157078  
49219, 23480, 863.1013, 2.156923  
49220, 23000, 863.0394, 2.156768  
49221, 22238, 862.9775, 2.156613  
49222, 21578, 862.9155, 2.156459  
49223, 21148, 862.8536, 2.156304  
49224, 20862, 862.7917, 2.156149  
49225, 20640, 862.7298, 2.155994  
49226, 20534, 862.6678, 2.155840  
49227, 20614, 862.6059, 2.155685  
49228, 20814, 862.5440, 2.155530  
49229, 20992, 862.4820, 2.155375  
49230, 21104, 862.4201, 2.155221  
49231, 21310, 862.3582, 2.155066  
49232, 21772, 862.2963, 2.154911  
49233, 22408, 862.2343, 2.154756  
49234, 22926, 862.1724, 2.154602  
49235, 23052, 862.1105, 2.154447  
49236, 22822, 862.0486, 2.154292  
49237, 22504, 861.9866, 2.154137  
49238, 22330, 861.9247, 2.153982  
49239, 22268, 861.8628, 2.153828  
49240, 22134, 861.8009, 2.153673  
49241, 21874, 861.7389, 2.153518  
49242, 21640, 861.6770, 2.153363  
49243, 21588, 861.6151, 2.153209  
49244, 21630, 861.5531, 2.153054  
49245, 21494, 861.4912, 2.152899  
49246, 21040, 861.4293, 2.152744  
49247, 20480, 861.3674, 2.152590  
49248, 20166, 861.3054, 2.152435  
49249, 20188, 861.2435, 2.152280  
49250, 20204, 861.1816, 2.152125  
49251, 19714, 861.1197, 2.151971  
49252, 18542, 861.0577, 2.151816  
49253, 17058, 860.9958, 2.151661  
49254, 15882, 860.9339, 2.151506  
49255, 15430, 860.8719, 2.151352  
49256, 15660, 860.8100, 2.151197  
49257, 16270, 860.7481, 2.151042  
49258, 16974, 860.6862, 2.150887  
49259, 17648, 860.6242, 2.150733  
49260, 18268, 860.5623, 2.150578  
49261, 18772, 860.5004, 2.150423  
49262, 19144, 860.4385, 2.150268  
49263, 19444, 860.3765, 2.150114  
49264, 19814, 860.3146, 2.149959  
49265, 20296, 860.2527, 2.149804  
49266, 20782, 860.1908, 2.149649  
49267, 21142, 860.1288, 2.149495  
49268, 21378, 860.0669, 2.149340  
49269, 21622, 860.0050, 2.149185  
49270, 21922, 859.9430, 2.149030  
49271, 22098, 859.8811, 2.148875  
49272, 21916, 859.8192, 2.148721  
49273, 21326, 859.7573, 2.148566  
49274, 20630, 859.6953, 2.148411  
49275, 20228, 859.6334, 2.148256  
49276, 20254, 859.5715, 2.148102  
49277, 20482, 859.5096, 2.147947  
49278, 20582, 859.4476, 2.147792  
49279, 20468, 859.3857, 2.147637  
49280, 20314, 859.3238, 2.147483  
49281, 20276, 859.2618, 2.147328  
49282, 20252, 859.1999, 2.147173  
49283, 20014, 859.1380, 2.147018  
49284, 19538, 859.0761, 2.146864  
49285, 19124, 859.0141, 2.146709  
49286, 19134, 858.9522, 2.146554  
49287, 19590, 858.8903, 2.146399  
49288, 20126, 858.8284, 2.146245  
49289, 20332, 858.7664, 2.146090  
49290, 20188, 858.7045, 2.145935  
49291, 20008, 858.6426, 2.145780  
49292, 20078, 858.5807, 2.145626  
49293, 20324, 858.5187, 2.145471  
49294, 20386, 858.4568, 2.145316  
49295, 20078, 858.3949, 2.145161  
49296, 19598, 858.3329, 2.145007  
49297, 19364, 858.2710, 2.144852  
49298, 19570, 858.2091, 2.144697  
49299, 20042, 858.1472, 2.144542  
49300, 20438, 858.0852, 2.144388  
49301, 20626, 858.0233, 2.144233  
49302, 20722, 857.9614, 2.144078  
49303, 20856, 857.8995, 2.143923  
49304, 20964, 857.8375, 2.143768  
49305, 20834, 857.7756, 2.143614  
49306, 20392, 857.7137, 2.143459  
49307, 19798, 857.6517, 2.143304  
49308, 19294, 857.5898, 2.143149  
49309, 18956, 857.5279, 2.142995  
49310, 18690, 857.4660, 2.142840  
49311, 18466, 857.4040, 2.142685  
49312, 18434, 857.3421, 2.142530  
49313, 18800, 857.2802, 2.142376  
49314, 19548, 857.2183, 2.142221  
49315, 20372, 857.1563, 2.142066  
49316, 20938, 857.0944, 2.141911  
49317, 21168, 857.0325, 2.141757  
49318, 21264, 856.9706, 2.141602  
49319, 21404, 856.9086, 2.141447  
49320, 21522, 856.8467, 2.141292  
49321, 21386, 856.7848, 2.141138  
49322, 20928, 856.7228, 2.140983  
49323, 20388, 856.6609, 2.140828  
49324, 20098, 856.5990, 2.140673  
49325, 20132, 856.5371, 2.140519  
49326, 20246, 856.4751, 2.140364  
49327, 20148, 856.4132, 2.140209  
49328, 19812, 856.3513, 2.140054  
49329, 19512, 856.2894, 2.139900  
49330, 19516, 856.2274, 2.139745  
49331, 19868, 856.1655, 2.139590  
49332, 20428, 856.1036, 2.139435  
49333, 21086, 856.0416, 2.139280  
49334, 21822, 855.9797, 2.139126  
49335, 22596, 855.9178, 2.138971  
49336, 23184, 855.8559, 2.138816  
49337, 23362, 855.7939, 2.138661  
49338, 23172, 855.7320, 2.138507  
49339, 22980, 855.6701, 2.138352  
49340, 23144, 855.6082, 2.138197  
49341, 23606, 855.5462, 2.138042  
49342, 23872, 855.4843, 2.137888  
49343, 23478, 855.4224, 2.137733  
49344, 22502, 855.3605, 2.137578  
49345, 21518, 855.2985, 2.137423  
49346, 21086, 855.2366, 2.137269  
49347, 21208, 855.1747, 2.137114  
49348, 21402, 855.1127, 2.136959  
49349, 21184, 855.0508, 2.136804  
49350, 20548, 854.9889, 2.136650  
49351, 19888, 854.9270, 2.136495  
49352, 19582, 854.8650, 2.136340  
49353, 19648, 854.8031, 2.136185  
49354, 19870, 854.7412, 2.136031  
49355, 20108, 854.6793, 2.135876  
49356, 20446, 854.6173, 2.135721  
49357, 20974, 854.5554, 2.135566  
49358, 21578, 854.4935, 2.135412  
49359, 21976, 854.4315, 2.135257  
49360, 21980, 854.3696, 2.135102  
49361, 21676, 854.3077, 2.134947  
49362, 21322, 854.2458, 2.134793  
49363, 21090, 854.1838, 2.134638  
49364, 20970, 854.1219, 2.134483  
49365, 20908, 854.0600, 2.134328  
49366, 20938, 853.9981, 2.134173  
49367, 21120, 853.9361, 2.134019  
49368, 21388, 853.8742, 2.133864  
49369, 21534, 853.8123, 2.133709  
49370, 21404, 853.7504, 2.133554  
49371, 21082, 853.6884, 2.133400  
49372, 20800, 853.6265, 2.133245  
49373, 20652, 853.5646, 2.133090  
49374, 20466, 853.5026, 2.132935  
49375, 20030, 853.4407, 2.132781  
49376, 19412, 853.3788, 2.132626  
49377, 18992, 853.3169, 2.132471  
49378, 19072, 853.2549, 2.132316  
49379, 19508, 853.1930, 2.132162  
49380, 19822, 853.1311, 2.132007  
49381, 19698, 853.0692, 2.131852  
49382, 19356, 853.0072, 2.131697  
49383, 19312, 852.9453, 2.131543  
49384, 19784, 852.8834, 2.131388  
49385, 20396, 852.8214, 2.131233  
49386, 20530, 852.7595, 2.131078  
49387, 19972, 852.6976, 2.130924  
49388, 19152, 852.6357, 2.130769  
49389, 18668, 852.5737, 2.130614  
49390, 18656, 852.5118, 2.130459  
49391, 18702, 852.4499, 2.130305  
49392, 18380, 852.3880, 2.130150  
49393, 17798, 852.3260, 2.129995  
49394, 17476, 852.2641, 2.129840  
49395, 17720, 852.2022, 2.129686  
49396, 18190, 852.1403, 2.129531  
49397, 18176, 852.0783, 2.129376  
49398, 17408, 852.0164, 2.129221  
49399, 16382, 851.9545, 2.129066  
49400, 15964, 851.8925, 2.128912  
49401, 16560, 851.8306, 2.128757  
49402, 17772, 851.7687, 2.128602  
49403, 18842, 851.7068, 2.128447  
49404, 19360, 851.6448, 2.128293  
49405, 19526, 851.5829, 2.128138  
49406, 19732, 851.5210, 2.127983  
49407, 20064, 851.4591, 2.127828  
49408, 20252, 851.3971, 2.127674  
49409, 20100, 851.3352, 2.127519  
49410, 19812, 851.2733, 2.127364  
49411, 19832, 851.2113, 2.127209  
49412, 20324, 851.1494, 2.127055  
49413, 20978, 851.0875, 2.126900  
49414, 21276, 851.0256, 2.126745  
49415, 21004, 850.9636, 2.126590  
49416, 20448, 850.9017, 2.126436  
49417, 20064, 850.8398, 2.126281  
49418, 20052, 850.7779, 2.126126  
49419, 20240, 850.7159, 2.125971  
49420, 20354, 850.6540, 2.125817  
49421, 20312, 850.5921, 2.125662  
49422, 20270, 850.5302, 2.125507  
49423, 20400, 850.4682, 2.125352  
49424, 20690, 850.4063, 2.125198  
49425, 20978, 850.3444, 2.125043  
49426, 21124, 850.2824, 2.124888  
49427, 21054, 850.2205, 2.124733  
49428, 20790, 850.1586, 2.124579  
49429, 20390, 850.0967, 2.124424  
49430, 19948, 850.0347, 2.124269  
49431, 19602, 849.9728, 2.124114  
49432, 19408, 849.9109, 2.123959  
49433, 19252, 849.8490, 2.123805  
49434, 18936, 849.7870, 2.123650

49435, 18388, 849.7251, 2.123495  
49436, 17854, 849.6632, 2.123340  
49437, 17764, 849.6012, 2.123186  
49438, 18384, 849.5393, 2.123031  
49439, 19562, 849.4774, 2.122876  
49440, 20824, 849.4155, 2.122721  
49441, 21744, 849.3535, 2.122567  
49442, 22178, 849.2916, 2.122412  
49443, 22200, 849.2297, 2.122257  
49444, 21840, 849.1678, 2.122102  
49445, 21038, 849.1058, 2.121948  
49446, 19810, 849.0439, 2.121793  
49447, 18472, 848.9820, 2.121638  
49448, 17544, 848.9201, 2.121483  
49449, 17430, 848.8581, 2.121329  
49450, 18124, 848.7962, 2.121174  
49451, 19280, 848.7343, 2.121019  
49452, 20462, 848.6723, 2.120864  
49453, 21380, 848.6104, 2.120710  
49454, 21868, 848.5485, 2.120555  
49455, 21808, 848.4866, 2.120400  
49456, 21168, 848.4246, 2.120245  
49457, 20146, 848.3627, 2.120091  
49458, 19142, 848.3008, 2.119936  
49459, 18508, 848.2389, 2.119781  
49460, 18284, 848.1769, 2.119626  
49461, 18202, 848.1150, 2.119472  
49462, 18020, 848.0531, 2.119317  
49463, 17802, 847.9912, 2.119162  
49464, 17788, 847.9292, 2.119007  
49465, 18040, 847.8673, 2.118852  
49466, 18272, 847.8054, 2.118698  
49467, 18126, 847.7434, 2.118543  
49468, 17648, 847.6815, 2.118388  
49469, 17338, 847.6196, 2.118233  
49470, 17680, 847.5577, 2.118079  
49471, 18594, 847.4957, 2.117924  
49472, 19430, 847.4338, 2.117769  
49473, 19572, 847.3719, 2.117614  
49474, 19038, 847.3100, 2.117460  
49475, 18438, 847.2480, 2.117305  
49476, 18348, 847.1861, 2.117150  
49477, 18752, 847.1242, 2.116995  
49478, 19130, 847.0622, 2.116841  
49479, 19086, 847.0003, 2.116686  
49480, 18746, 846.9384, 2.116531  
49481, 18636, 846.8765, 2.116376  
49482, 19084, 846.8145, 2.116222  
49483, 19930, 846.7526, 2.116067  
49484, 20762, 846.6907, 2.115912  
49485, 21330, 846.6288, 2.115757  
49486, 21706, 846.5668, 2.115603  
49487, 21970, 846.5049, 2.115448  
49488, 21992, 846.4430, 2.115293  
49489, 21546, 846.3811, 2.115138  
49490, 20700, 846.3191, 2.114984  
49491, 19952, 846.2572, 2.114829  
49492, 19850, 846.1953, 2.114674  
49493, 20522, 846.1333, 2.114519  
49494, 21578, 846.0714, 2.114365  
49495, 22504, 846.0095, 2.114210  
49496, 23102, 845.9476, 2.114055  
49497, 23560, 845.8856, 2.113900  
49498, 24036, 845.8237, 2.113745  
49499, 24400, 845.7618, 2.113591  
49500, 24354, 845.6999, 2.113436  
49501, 23856, 845.6379, 2.113281  
49502, 23246, 845.5760, 2.113126  
49503, 22962, 845.5141, 2.112972  
49504, 23082, 845.4521, 2.112817  
49505, 23256, 845.3902, 2.112662  
49506, 23054, 845.3283, 2.112507  
49507, 22380, 845.2664, 2.112353  
49508, 21500, 845.2044, 2.112198  
49509, 20732, 845.1425, 2.112043  
49510, 20136, 845.0806, 2.111888  
49511, 19596, 845.0187, 2.111734  
49512, 19038, 844.9567, 2.111579  
49513, 18544, 844.8948, 2.111424  
49514, 18218, 844.8329, 2.111269  
49515, 18038, 844.7710, 2.111115  
49516, 17914, 844.7090, 2.110960  
49517, 17878, 844.6471, 2.110805  
49518, 18122, 844.5852, 2.110650  
49519, 18748, 844.5232, 2.110496  
49520, 19522, 844.4613, 2.110341  
49521, 19988, 844.3994, 2.110186  
49522, 19862, 844.3375, 2.110031  
49523, 19334, 844.2755, 2.109877  
49524, 18896, 844.2136, 2.109722  
49525, 18856, 844.1517, 2.109567  
49526, 19064, 844.0898, 2.109412  
49527, 19120, 844.0278, 2.109258  
49528, 18882, 843.9659, 2.109103  
49529, 18644, 843.9040, 2.108948  
49530, 18818, 843.8420, 2.108793  
49531, 19478, 843.7801, 2.108638  
49532, 20270, 843.7182, 2.108484  
49533, 20736, 843.6563, 2.108329  
49534, 20758, 843.5943, 2.108174  
49535, 20570, 843.5324, 2.108019  
49536, 20422, 843.4705, 2.107865  
49537, 20314, 843.4086, 2.107710  
49538, 20070, 843.3466, 2.107555  
49539, 19646, 843.2847, 2.107400  
49540, 19252, 843.2228, 2.107246  
49541, 19160, 843.1609, 2.107091  
49542, 19420, 843.0989, 2.106936  
49543, 19804, 843.0370, 2.106781  
49544, 20070, 842.9751, 2.106627  
49545, 20134, 842.9131, 2.106472  
49546, 20040, 842.8512, 2.106317  
49547, 19808, 842.7893, 2.106162  
49548, 19372, 842.7274, 2.106008  
49549, 18820, 842.6654, 2.105853  
49550, 18464, 842.6035, 2.105698  
49551, 18642, 842.5416, 2.105543  
49552, 19362, 842.4797, 2.105389  
49553, 20150, 842.4177, 2.105234  
49554, 20414, 842.3558, 2.105079  
49555, 19960, 842.2939, 2.104924  
49556, 19166, 842.2319, 2.104770  
49557, 18654, 842.1700, 2.104615  
49558, 18740, 842.1081, 2.104460  
49559, 19246, 842.0462, 2.104305  
49560, 19768, 841.9842, 2.104151  
49561, 20044, 841.9223, 2.103996  
49562, 20080, 841.8604, 2.103841  
49563, 19988, 841.7985, 2.103686  
49564, 19840, 841.7365, 2.103531  
49565, 19704, 841.6746, 2.103377  
49566, 19750, 841.6127, 2.103222  
49567, 20114, 841.5508, 2.103067  
49568, 20672, 841.4888, 2.102912  
49569, 20974, 841.4269, 2.102758  
49570, 20628, 841.3650, 2.102603  
49571, 19718, 841.3030, 2.102448  
49572, 18892, 841.2411, 2.102293  
49573, 18806, 841.1792, 2.102139  
49574, 19522, 841.1173, 2.101984  
49575, 20400, 841.0553, 2.101829  
49576, 20672, 840.9934, 2.101674  
49577, 20118, 840.9315, 2.101520  
49578, 19218, 840.8696, 2.101365  
49579, 18618, 840.8076, 2.101210  
49580, 18564, 840.7457, 2.101055  
49581, 18800, 840.6838, 2.100901  
49582, 18952, 840.6218, 2.100746  
49583, 18926, 840.5599, 2.100591  
49584, 18880, 840.4980, 2.100436  
49585, 18928, 840.4361, 2.100282  
49586, 18960, 840.3741, 2.100127  
49587, 18848, 840.3122, 2.099972  
49588, 18678, 840.2503, 2.099817  
49589, 18702, 840.1884, 2.099663  
49590, 19080, 840.1264, 2.099508  
49591, 19634, 840.0645, 2.099353  
49592, 20028, 840.0026, 2.099198  
49593, 20102, 839.9407, 2.099043  
49594, 19982, 839.8787, 2.098889  
49595, 19858, 839.8168, 2.098734  
49596, 19702, 839.7549, 2.098579  
49597, 19344, 839.6929, 2.098424  
49598, 18738, 839.6310, 2.098270  
49599, 18186, 839.5691, 2.098115  
49600, 18080, 839.5072, 2.097960  
49601, 18494, 839.4452, 2.097805  
49602, 19090, 839.3833, 2.097651  
49603, 19442, 839.3214, 2.097496  
49604, 19502, 839.2595, 2.097341  
49605, 19624, 839.1975, 2.097186  
49606, 20100, 839.1356, 2.097032  
49607, 20782, 839.0737, 2.096877  
49608, 21184, 839.0117, 2.096722  
49609, 21016, 838.9498, 2.096567  
49610, 20496, 838.8879, 2.096413  
49611, 20168, 838.8260, 2.096258  
49612, 20288, 838.7640, 2.096103  
49613, 20576, 838.7021, 2.095948  
49614, 20512, 838.6402, 2.095794  
49615, 19894, 838.5783, 2.095639  
49616, 19076, 838.5163, 2.095484  
49617, 18628, 838.4544, 2.095329  
49618, 18854, 838.3925, 2.095175  
49619, 19554, 838.3306, 2.095020  
49620, 20312, 838.2686, 2.094865  
49621, 20808, 838.2067, 2.094710  
49622, 20958, 838.1448, 2.094556  
49623, 20794, 838.0828, 2.094401  
49624, 20372, 838.0209, 2.094246  
49625, 19816, 837.9590, 2.094091  
49626, 19360, 837.8971, 2.093936  
49627, 19178, 837.8351, 2.093782  
49628, 19244, 837.7732, 2.093627  
49629, 19320, 837.7113, 2.093472  
49630, 19236, 837.6494, 2.093317  
49631, 19090, 837.5874, 2.093163  
49632, 19162, 837.5255, 2.093008  
49633, 19528, 837.4636, 2.092853  
49634, 19896, 837.4016, 2.092698  
49635, 19874, 837.3397, 2.092544  
49636, 19456, 837.2778, 2.092389  
49637, 19116, 837.2159, 2.092234  
49638, 19340, 837.1539, 2.092079  
49639, 20050, 837.0920, 2.091925  
49640, 20574, 837.0301, 2.091770  
49641, 20260, 836.9682, 2.091615  
49642, 19132, 836.9062, 2.091460  
49643, 17940, 836.8443, 2.091306  
49644, 17442, 836.7824, 2.091151  
49645, 17758, 836.7205, 2.090996  
49646, 18320, 836.6585, 2.090841  
49647, 18536, 836.5966, 2.090687  
49648, 18364, 836.5347, 2.090532  
49649, 18220, 836.4727, 2.090377  
49650, 18450, 836.4108, 2.090222  
49651, 18906, 836.3489, 2.090068  
49652, 19166, 836.2870, 2.089913  
49653, 19046, 836.2250, 2.089758  
49654, 18850, 836.1631, 2.089603  
49655, 19032, 836.1012, 2.089449  
49656, 19704, 836.0393, 2.089294  
49657, 20514, 835.9773, 2.089139  
49658, 20998, 835.9154, 2.088984  
49659, 21014, 835.8535, 2.088829  
49660, 20818, 835.7915, 2.088675  
49661, 20702, 835.7296, 2.088520  
49662, 20722, 835.6677, 2.088365

49663, 20718, 835.6058, 2.088210  
49664, 20596, 835.5438, 2.088056  
49665, 20446, 835.4819, 2.087901  
49666, 20418, 835.4200, 2.087746  
49667, 20504, 835.3581, 2.087591  
49668, 20514, 835.2961, 2.087437  
49669, 20310, 835.2342, 2.087282  
49670, 19968, 835.1723, 2.087127  
49671, 19742, 835.1104, 2.086972  
49672, 19818, 835.0484, 2.086818  
49673, 20184, 834.9865, 2.086663  
49674, 20676, 834.9246, 2.086508  
49675, 21150, 834.8626, 2.086353  
49676, 21550, 834.8007, 2.086199  
49677, 21840, 834.7388, 2.086044  
49678, 21990, 834.6769, 2.085889  
49679, 21990, 834.6149, 2.085734  
49680, 21918, 834.5530, 2.085580  
49681, 21862, 834.4911, 2.085425  
49682, 21814, 834.4292, 2.085270  
49683, 21652, 834.3672, 2.085115  
49684, 21290, 834.3053, 2.084961  
49685, 20852, 834.2434, 2.084806  
49686, 20638, 834.1815, 2.084651  
49687, 20872, 834.1195, 2.084496  
49688, 21472, 834.0576, 2.084342  
49689, 22116, 833.9957, 2.084187  
49690, 22492, 833.9337, 2.084032  
49691, 22508, 833.8718, 2.083877  
49692, 22268, 833.8099, 2.083722  
49693, 21872, 833.7480, 2.083568  
49694, 21348, 833.6860, 2.083413  
49695, 20736, 833.6241, 2.083258  
49696, 20182, 833.5622, 2.083103  
49697, 19868, 833.5003, 2.082949  
49698, 19788, 833.4383, 2.082794  
49699, 19716, 833.3764, 2.082639  
49700, 19442, 833.3145, 2.082484  
49701, 19050, 833.2525, 2.082330  
49702, 18880, 833.1906, 2.082175  
49703, 19214, 833.1287, 2.082020  
49704, 19924, 833.0668, 2.081865  
49705, 20602, 833.0048, 2.081711  
49706, 20950, 832.9429, 2.081556  
49707, 21098, 832.8810, 2.081401  
49708, 21406, 832.8191, 2.081246  
49709, 22010, 832.7571, 2.081092  
49710, 22552, 832.6952, 2.080937  
49711, 22492, 832.6333, 2.080782  
49712, 21630, 832.5714, 2.080627  
49713, 20318, 832.5094, 2.080473  
49714, 19170, 832.4475, 2.080318  
49715, 18528, 832.3856, 2.080163  
49716, 18318, 832.3236, 2.080008  
49717, 18292, 832.2617, 2.079854  
49718, 18384, 832.1998, 2.079699  
49719, 18722, 832.1379, 2.079544  
49720, 19334, 832.0759, 2.079389  
49721, 19994, 832.0140, 2.079235  
49722, 20398, 831.9521, 2.079080  
49723, 20528, 831.8902, 2.078925  
49724, 20692, 831.8282, 2.078770  
49725, 21208, 831.7663, 2.078615  
49726, 22020, 831.7044, 2.078461  
49727, 22748, 831.6424, 2.078306  
49728, 23050, 831.5805, 2.078151  
49729, 22986, 831.5186, 2.077996  
49730, 22914, 831.4567, 2.077842  
49731, 23070, 831.3947, 2.077687  
49732, 23322, 831.3328, 2.077532  
49733, 23346, 831.2709, 2.077377  
49734, 23016, 831.2090, 2.077223  
49735, 22578, 831.1470, 2.077068  
49736, 22388, 831.0851, 2.076913  
49737, 22530, 831.0232, 2.076758  
49738, 22742, 830.9613, 2.076604  
49739, 22692, 830.8993, 2.076449  
49740, 22286, 830.8374, 2.076294  
49741, 21714, 830.7755, 2.076139  
49742, 21212, 830.7135, 2.075985  
49743, 20874, 830.6516, 2.075830  
49744, 20662, 830.5897, 2.075675  
49745, 20534, 830.5278, 2.075520  
49746, 20484, 830.4658, 2.075366  
49747, 20470, 830.4039, 2.075211  
49748, 20386, 830.3420, 2.075056  
49749, 20168, 830.2801, 2.074901  
49750, 19932, 830.2181, 2.074747  
49751, 19914, 830.1562, 2.074592  
49752, 20212, 830.0943, 2.074437  
49753, 20640, 830.0323, 2.074282  
49754, 20848, 829.9704, 2.074128  
49755, 20674, 829.9085, 2.073973  
49756, 20310, 829.8466, 2.073818  
49757, 20120, 829.7846, 2.073663  
49758, 20282, 829.7227, 2.073508  
49759, 20640, 829.6608, 2.073354  
49760, 20882, 829.5989, 2.073199  
49761, 20874, 829.5369, 2.073044  
49762, 20716, 829.4750, 2.072889  
49763, 20564, 829.4131, 2.072735  
49764, 20430, 829.3512, 2.072580  
49765, 20252, 829.2892, 2.072425  
49766, 20042, 829.2273, 2.072270  
49767, 19964, 829.1654, 2.072116  
49768, 20114, 829.1034, 2.071961  
49769, 20348, 829.0415, 2.071806  
49770, 20404, 828.9796, 2.071651  
49771, 20190, 828.9177, 2.071497  
49772, 19974, 828.8557, 2.071342  
49773, 20124, 828.7938, 2.071187  
49774, 20692, 828.7319, 2.071032  
49775, 21270, 828.6700, 2.070878  
49776, 21346, 828.6080, 2.070723  
49777, 20796, 828.5461, 2.070568  
49778, 20012, 828.4842, 2.070413  
49779, 19528, 828.4222, 2.070259  
49780, 19528, 828.3603, 2.070104  
49781, 19786, 828.2984, 2.069949  
49782, 19960, 828.2365, 2.069794  
49783, 20002, 828.1745, 2.069640  
49784, 20076, 828.1126, 2.069485  
49785, 20274, 828.0507, 2.069330  
49786, 20416, 827.9888, 2.069175  
49787, 20232, 827.9268, 2.069021  
49788, 19708, 827.8649, 2.068866  
49789, 19148, 827.8030, 2.068711  
49790, 18878, 827.7411, 2.068556  
49791, 18920, 827.6791, 2.068401  
49792, 19028, 827.6172, 2.068247  
49793, 18980, 827.5553, 2.068092  
49794, 18824, 827.4933, 2.067937  
49795, 18760, 827.4314, 2.067782  
49796, 18854, 827.3695, 2.067628  
49797, 18926, 827.3076, 2.067473  
49798, 18784, 827.2456, 2.067318  
49799, 18498, 827.1837, 2.067163  
49800, 18306, 827.1218, 2.067009  
49801, 18352, 827.0599, 2.066854  
49802, 18482, 826.9979, 2.066699  
49803, 18412, 826.9360, 2.066544  
49804, 18126, 826.8741, 2.066390  
49805, 17956, 826.8121, 2.066235  
49806, 18276, 826.7502, 2.066080  
49807, 19078, 826.6883, 2.065925  
49808, 19946, 826.6264, 2.065771  
49809, 20430, 826.5644, 2.065616  
49810, 20450, 826.5025, 2.065461  
49811, 20296, 826.4406, 2.065306  
49812, 20248, 826.3787, 2.065152  
49813, 20306, 826.3167, 2.064997  
49814, 20292, 826.2548, 2.064842  
49815, 20136, 826.1929, 2.064687  
49816, 20000, 826.1310, 2.064533  
49817, 20064, 826.0690, 2.064378  
49818, 20272, 826.0071, 2.064223  
49819, 20360, 825.9452, 2.064068  
49820, 20170, 825.8832, 2.063914  
49821, 19838, 825.8213, 2.063759  
49822, 19622, 825.7594, 2.063604  
49823, 19552, 825.6975, 2.063449  
49824, 19346, 825.6355, 2.063294  
49825, 18732, 825.5736, 2.063140  
49826, 17804, 825.5117, 2.062985  
49827, 16986, 825.4498, 2.062830  
49828, 16634, 825.3878, 2.062675  
49829, 16714, 825.3259, 2.062521  
49830, 16892, 825.2640, 2.062366  
49831, 16954, 825.2020, 2.062211  
49832, 17032, 825.1401, 2.062056  
49833, 17388, 825.0782, 2.061902  
49834, 18000, 825.0163, 2.061747  
49835, 18526, 824.9543, 2.061592  
49836, 18632, 824.8924, 2.061437  
49837, 18400, 824.8305, 2.061283  
49838, 18224, 824.7686, 2.061128  
49839, 18396, 824.7066, 2.060973  
49840, 18762, 824.6447, 2.060818  
49841, 18934, 824.5828, 2.060664  
49842, 18772, 824.5209, 2.060509  
49843, 18610, 824.4589, 2.060354  
49844, 18936, 824.3970, 2.060199  
49845, 19834, 824.3351, 2.060045  
49846, 20856, 824.2731, 2.059890  
49847, 21440, 824.2112, 2.059735  
49848, 21416, 824.1493, 2.059580  
49849, 21106, 824.0874, 2.059426  
49850, 20928, 824.0254, 2.059271  
49851, 20952, 823.9635, 2.059116  
49852, 20938, 823.9016, 2.058961  
49853, 20668, 823.8397, 2.058807  
49854, 20216, 823.7777, 2.058652  
49855, 19820, 823.7158, 2.058497  
49856, 19610, 823.6539, 2.058342  
49857, 19476, 823.5919, 2.058187  
49858, 19302, 823.5300, 2.058033  
49859, 19146, 823.4681, 2.057878  
49860, 19150, 823.4062, 2.057723  
49861, 19284, 823.3442, 2.057568  
49862, 19252, 823.2823, 2.057414  
49863, 18778, 823.2204, 2.057259  
49864, 17970, 823.1585, 2.057104  
49865, 17306, 823.0965, 2.056949  
49866, 17220, 823.0346, 2.056795  
49867, 17704, 822.9727, 2.056640  
49868, 18354, 822.9108, 2.056485  
49869, 18806, 822.8488, 2.056330  
49870, 19100, 822.7869, 2.056176  
49871, 19526, 822.7250, 2.056021  
49872, 20166, 822.6630, 2.055866  
49873, 20690, 822.6011, 2.055711  
49874, 20622, 822.5392, 2.055557  
49875, 19864, 822.4773, 2.055402  
49876, 18868, 822.4153, 2.055247  
49877, 18292, 822.3534, 2.055092  
49878, 18436, 822.2915, 2.054938  
49879, 19064, 822.2296, 2.054783  
49880, 19694, 822.1676, 2.054628  
49881, 20028, 822.1057, 2.054473  
49882, 20128, 822.0438, 2.054319  
49883, 20214, 821.9819, 2.054164  
49884, 20418, 821.9199, 2.054009  
49885, 20700, 821.8580, 2.053854  
49886, 20980, 821.7961, 2.053699  
49887, 21200, 821.7341, 2.053545  
49888, 21320, 821.6722, 2.053390  
49889, 21256, 821.6103, 2.053235  
49890, 20940, 821.5484, 2.053080



49891, 20450, 821.4864, 2.052926  
49892, 19996, 821.4245, 2.052771  
49893, 19760, 821.3626, 2.052616  
49894, 19740, 821.3007, 2.052461  
49895, 19778, 821.2387, 2.052307  
49896, 19756, 821.1768, 2.052152  
49897, 19734, 821.1149, 2.051997  
49898, 19864, 821.0529, 2.051842  
49899, 20184, 820.9910, 2.051688  
49900, 20522, 820.9291, 2.051533  
49901, 20650, 820.8672, 2.051378  
49902, 20518, 820.8052, 2.051223  
49903, 20264, 820.7433, 2.051069  
49904, 20056, 820.6814, 2.050914  
49905, 19922, 820.6195, 2.050759  
49906, 19784, 820.5575, 2.050604  
49907, 19624, 820.4956, 2.050450  
49908, 19546, 820.4337, 2.050295  
49909, 19662, 820.3718, 2.050140  
49910, 19932, 820.3098, 2.049985  
49911, 20176, 820.2479, 2.049831  
49912, 20260, 820.1860, 2.049676  
49913, 20306, 820.1240, 2.049521  
49914, 20538, 820.0621, 2.049366  
49915, 21070, 820.0002, 2.049212  
49916, 21702, 819.9383, 2.049057  
49917, 22082, 819.8763, 2.048902  
49918, 21970, 819.8144, 2.048747  
49919, 21428, 819.7525, 2.048592  
49920, 20702, 819.6906, 2.048438  
49921, 20054, 819.6286, 2.048283  
49922, 19608, 819.5667, 2.048128  
49923, 19416, 819.5048, 2.047973  
49924, 19496, 819.4428, 2.047819  
49925, 19796, 819.3809, 2.047664  
49926, 20162, 819.3190, 2.047509  
49927, 20364, 819.2571, 2.047354  
49928, 20288, 819.1951, 2.047200  
49929, 19992, 819.1332, 2.047045  
49930, 19656, 819.0713, 2.046890  
49931, 19368, 819.0094, 2.046735  
49932, 19106, 818.9474, 2.046581  
49933, 18862, 818.8855, 2.046426  
49934, 18768, 818.8236, 2.046271  
49935, 19050, 818.7617, 2.046116  
49936, 19756, 818.6997, 2.045962  
49937, 20644, 818.6378, 2.045807  
49938, 21338, 818.5759, 2.045652  
49939, 21636, 818.5139, 2.045497  
49940, 21674, 818.4520, 2.045343  
49941, 21708, 818.3901, 2.045188  
49942, 21812, 818.3282, 2.045033  
49943, 21804, 818.2662, 2.044878  
49944, 21516, 818.2043, 2.044724  
49945, 21078, 818.1424, 2.044569  
49946, 20852, 818.0805, 2.044414  
49947, 21070, 818.0185, 2.044259  
49948, 21552, 817.9566, 2.044105  
49949, 21872, 817.8947, 2.043950  
49950, 21756, 817.8327, 2.043795  
49951, 21382, 817.7708, 2.043640  
49952, 21150, 817.7089, 2.043485  
49953, 21284, 817.6470, 2.043331  
49954, 21582, 817.5850, 2.043176  
49955, 21664, 817.5231, 2.043021  
49956, 21346, 817.4612, 2.042866  
49957, 20802, 817.3993, 2.042712  
49958, 20344, 817.3373, 2.042557  
49959, 20112, 817.2754, 2.042402  
49960, 20014, 817.2135, 2.042247  
49961, 19936, 817.1516, 2.042093  
49962, 19946, 817.0896, 2.041938  
49963, 20226, 817.0277, 2.041783  
49964, 20868, 816.9658, 2.041628  
49965, 21726, 816.9038, 2.041474  
49966, 22554, 816.8419, 2.041319

49967, 23182, 816.7800, 2.041164  
49968, 23576, 816.7181, 2.041009  
49969, 23754, 816.6561, 2.040855  
49970, 23660, 816.5942, 2.040700  
49971, 23270, 816.5323, 2.040545  
49972, 22680, 816.4704, 2.040390  
49973, 22124, 816.4084, 2.040236  
49974, 21806, 816.3465, 2.040081  
49975, 21736, 816.2846, 2.039926  
49976, 21800, 816.2226, 2.039771  
49977, 21918, 816.1607, 2.039617  
49978, 22170, 816.0988, 2.039462  
49979, 22656, 816.0369, 2.039307  
49980, 23330, 815.9749, 2.039152  
49981, 23934, 815.9130, 2.038998  
49982, 24232, 815.8511, 2.038843  
49983, 24178, 815.7892, 2.038688  
49984, 23928, 815.7272, 2.038533  
49985, 23646, 815.6653, 2.038378  
49986, 23170, 815.6034, 2.038224  
49987, 23088, 815.5415, 2.038069  
49988, 22850, 815.4795, 2.037914  
49989, 22758, 815.4176, 2.037759  
49990, 22778, 815.3557, 2.037605  
49991, 22656, 815.2937, 2.037450  
49992, 22092, 815.2318, 2.037295  
49993, 21088, 815.1699, 2.037140  
49994, 20058, 815.1080, 2.036986  
49995, 19526, 815.0460, 2.036831  
49996, 19678, 814.9841, 2.036676  
49997, 20176, 814.9222, 2.036521  
49998, 20466, 814.8603, 2.036367  
49999, 20290, 814.7983, 2.036212  
50000, 19858, 814.7364, 2.036057  
50001, 19596, 814.6745, 2.035902  
50002, 19712, 814.6125, 2.035748  
50003, 20086, 814.5506, 2.035593  
50004, 20448, 814.4887, 2.035438  
50005, 20686, 814.4268, 2.035283  
50006, 20860, 814.3648, 2.035129  
50007, 21018, 814.3029, 2.034974  
50008, 21072, 814.2410, 2.034819  
50009, 20888, 814.1791, 2.034664  
50010, 20490, 814.1171, 2.034510  
50011, 20082, 814.0552, 2.034355  
50012, 19848, 813.9933, 2.034200  
50013, 19796, 813.9314, 2.034045  
50014, 19756, 813.8694, 2.033891  
50015, 19604, 813.8075, 2.033736  
50016, 19376, 813.7456, 2.033581  
50017, 19208, 813.6836, 2.033426  
50018, 19136, 813.6217, 2.033271  
50019, 19112, 813.5598, 2.033117  
50020, 19102, 813.4979, 2.032962  
50021, 19202, 813.4359, 2.032807  
50022, 19538, 813.3740, 2.032652  
50023, 20066, 813.3121, 2.032498  
50024, 20528, 813.2502, 2.032343  
50025, 20666, 813.1882, 2.032188  
50026, 20460, 813.1263, 2.032033  
50027, 20166, 813.0644, 2.031879  
50028, 20054, 813.0024, 2.031724  
50029, 20202, 812.9405, 2.031569  
50030, 20468, 812.8786, 2.031414  
50031, 20740, 812.8167, 2.031260  
50032, 21038, 812.7547, 2.031105  
50033, 21402, 812.6928, 2.030950  
50034, 21730, 812.6309, 2.030795  
50035, 21790, 812.5690, 2.030641  
50036, 21474, 812.5070, 2.030486  
50037, 20944, 812.4451, 2.030331  
50038, 20542, 812.3832, 2.030176  
50039, 20444, 812.3213, 2.030022  
50040, 20480, 812.2593, 2.029867  
50041, 20304, 812.1974, 2.029712  
50042, 19768, 812.1355, 2.029557

50043, 19052, 812.0735, 2.029403  
50044, 18444, 812.0116, 2.029248  
50045, 18060, 811.9497, 2.029093  
50046, 17788, 811.8878, 2.028938  
50047, 17558, 811.8258, 2.028784  
50048, 17462, 811.7639, 2.028629  
50049, 17662, 811.7020, 2.028474  
50050, 18056, 811.6401, 2.028319  
50051, 18250, 811.5781, 2.028164  
50052, 17874, 811.5162, 2.028010  
50053, 16988, 811.4543, 2.027855  
50054, 16076, 811.3923, 2.027700  
50055, 15612, 811.3304, 2.027545  
50056, 15652, 811.2685, 2.027391  
50057, 15862, 811.2066, 2.027236  
50058, 15964, 811.1446, 2.027081  
50059, 16082, 811.0827, 2.026926  
50060, 16618, 811.0208, 2.026772  
50061, 17744, 810.9589, 2.026617  
50062, 16032, 810.8969, 2.026462  
50063, 20194, 810.8350, 2.026307  
50064, 20592, 810.7731, 2.026153  
50065, 20502, 810.7112, 2.025998  
50066, 20388, 810.6492, 2.025843  
50067, 20554, 810.5873, 2.025688  
50068, 20956, 810.5254, 2.025534  
50069, 21362, 810.4634, 2.025379  
50070, 21628, 810.4015, 2.025224  
50071, 21744, 810.3396, 2.025069  
50072, 21698, 810.2777, 2.024915  
50073, 21426, 810.2157, 2.024760  
50074, 20932, 810.1538, 2.024605  
50075, 20438, 810.0919, 2.024450  
50076, 20274, 810.0300, 2.024296  
50077, 20556, 809.9680, 2.024141  
50078, 21016, 809.9061, 2.023986  
50079, 21212, 809.8442, 2.023831  
50080, 20940, 809.7822, 2.023677  
50081, 20424, 809.7203, 2.023522  
50082, 20084, 809.6584, 2.023367  
50083, 20098, 809.5965, 2.023212  
50084, 20234, 809.5345, 2.023057  
50085, 20144, 809.4726, 2.022903  
50086, 19734, 809.4107, 2.022748  
50087, 19298, 809.3488, 2.022593  
50088, 19206, 809.2868, 2.022438  
50089, 19544, 809.2249, 2.022284  
50090, 20054, 809.1630, 2.022129  
50091, 20376, 809.1011, 2.021974  
50092, 20338, 809.0391, 2.021819  
50093, 20066, 808.9772, 2.021665  
50094, 19818, 808.9153, 2.021510  
50095, 19812, 808.8533, 2.021355  
50096, 20124, 808.7914, 2.021200  
50097, 20674, 808.7295, 2.021046  
50098, 21206, 808.6676, 2.020891  
50099, 21424, 808.6056, 2.020736  
50100, 21190, 808.5437, 2.020581  
50101, 20682, 808.4818, 2.020427  
50102, 20334, 808.4199, 2.020272  
50103, 20490, 808.3579, 2.020117  
50104, 21066, 808.2960, 2.019962  
50105, 21584, 808.2341, 2.019808  
50106, 21588, 808.1722, 2.019653  
50107, 21064, 808.1102, 2.019498  
50108, 20418, 808.0483, 2.019343  
50109, 20064, 807.9864, 2.019189  
50110, 20020, 807.9244, 2.019034  
50111, 19950, 807.8625, 2.018879  
50112, 19606, 807.8006, 2.018724  
50113, 19142, 807.7387, 2.018570  
50114, 18980, 807.6767, 2.018415  
50115, 19320, 807.6148, 2.018260  
50116, 19946, 807.5529, 2.018105  
50117, 20434, 807.4910, 2.017950  
50118, 20614, 807.4290, 2.017796

50119, 20710, 807.3671, 2.017641  
50120, 21046, 807.3052, 2.017486  
50121, 21642, 807.2432, 2.017331  
50122, 22212, 807.1813, 2.017177  
50123, 22496, 807.1194, 2.017022  
50124, 22556, 807.0575, 2.016867  
50125, 22682, 806.9955, 2.016712  
50126, 23016, 806.9336, 2.016558  
50127, 23332, 806.8717, 2.016403  
50128, 23288, 806.8098, 2.016248  
50129, 22816, 806.7478, 2.016093  
50130, 22292, 806.6859, 2.015939  
50131, 22206, 806.6240, 2.015784  
50132, 22752, 806.5621, 2.015629  
50133, 23666, 806.5001, 2.015474  
50134, 24494, 806.4382, 2.015320  
50135, 24934, 806.3763, 2.015165  
50136, 24942, 806.3143, 2.015010  
50137, 24630, 806.2524, 2.014855  
50138, 24120, 806.1905, 2.014701  
50139, 23548, 806.1286, 2.014546  
50140, 23094, 806.0666, 2.014391  
50141, 22898, 806.0047, 2.014236  
50142, 22898, 805.9428, 2.014082  
50143, 22866, 805.8809, 2.013927  
50144, 22602, 805.8189, 2.013772  
50145, 22186, 805.7570, 2.013617  
50146, 21904, 805.6951, 2.013463  
50147, 21950, 805.6331, 2.013308  
50148, 22166, 805.5712, 2.013153  
50149, 22220, 805.5093, 2.012998  
50150, 21958, 805.4474, 2.012843  
50151, 21626, 805.3854, 2.012689  
50152, 21628, 805.3235, 2.012534  
50153, 22066, 805.2616, 2.012379  
50154, 22630, 805.1997, 2.012224  
50155, 22846, 805.1377, 2.012070  
50156, 22558, 805.0758, 2.011915  
50157, 22004, 805.0139, 2.011760  
50158, 21534, 804.9520, 2.011605  
50159, 21260, 804.8900, 2.011451  
50160, 21048, 804.8281, 2.011296  
50161, 20832, 804.7662, 2.011141  
50162, 20780, 804.7042, 2.010986  
50163, 21088, 804.6423, 2.010832  
50164, 21690, 804.5804, 2.010677  
50165, 22200, 804.5185, 2.010522  
50166, 22270, 804.4565, 2.010367  
50167, 21980, 804.3946, 2.010213  
50168, 21760, 804.3327, 2.010058  
50169, 21952, 804.2708, 2.009903  
50170, 22440, 804.2088, 2.009748  
50171, 22770, 804.1469, 2.009594  
50172, 22668, 804.0850, 2.009439  
50173, 22332, 804.0230, 2.009284  
50174, 22204, 803.9611, 2.009129  
50175, 22464, 803.8992, 2.008975  
50176, 22800, 803.8373, 2.008820  
50177, 22722, 803.7753, 2.008665  
50178, 22104, 803.7134, 2.008510  
50179, 21370, 803.6515, 2.008355  
50180, 21144, 803.5896, 2.008201  
50181, 21732, 803.5276, 2.008046  
50182, 22876, 803.4657, 2.007891  
50183, 24008, 803.4038, 2.007736  
50184, 24664, 803.3419, 2.007582  
50185, 24726, 803.2799, 2.007427  
50186, 24340, 803.2180, 2.007272  
50187, 23734, 803.1561, 2.007117  
50188, 23120, 803.0941, 2.006963  
50189, 22618, 803.0322, 2.006808  
50190, 22250, 802.9703, 2.006653  
50191, 21914, 802.9084, 2.006498  
50192, 21484, 802.8464, 2.006344  
50193, 20972, 802.7845, 2.006189  
50194, 20600, 802.7226, 2.006034

50195, 20636, 802.6607, 2.005879  
50196, 21116, 802.5987, 2.005725  
50197, 21732, 802.5368, 2.005570  
50198, 22060, 802.4749, 2.005415  
50199, 21886, 802.4129, 2.005260  
50200, 21372, 802.3510, 2.005106  
50201, 20856, 802.2891, 2.004951  
50202, 20536, 802.2272, 2.004796  
50203, 20358, 802.1652, 2.004641  
50204, 20182, 802.1033, 2.004487  
50205, 19972, 802.0414, 2.004332  
50206, 19834, 801.9795, 2.004177  
50207, 19856, 801.9175, 2.004022  
50208, 20000, 801.8556, 2.003868  
50209, 20194, 801.7937, 2.003713  
50210, 20456, 801.7318, 2.003558  
50211, 20848, 801.6698, 2.003403  
50212, 21336, 801.6079, 2.003248  
50213, 21692, 801.5460, 2.003094  
50214, 21684, 801.4840, 2.002939  
50215, 21330, 801.4221, 2.002784  
50216, 20932, 801.3602, 2.002629  
50217, 20802, 801.2983, 2.002475  
50218, 20934, 801.2363, 2.002320  
50219, 21004, 801.1744, 2.002165  
50220, 20726, 801.1125, 2.002010  
50221, 20192, 801.0506, 2.001856  
50222, 19782, 800.9886, 2.001701  
50223, 19808, 800.9267, 2.001546  
50224, 20192, 800.8648, 2.001391  
50225, 20574, 800.8028, 2.001237  
50226, 20668, 800.7409, 2.001082  
50227, 20506, 800.6790, 2.000927  
50228, 20270, 800.6171, 2.000772  
50229, 20016, 800.5551, 2.000618  
50230, 19576, 800.4932, 2.000463  
50231, 18822, 800.4313, 2.000308  
50232, 17900, 800.3694, 2.000153  
50233, 17194, 800.3074, 1.999999  
50234, 17018, 800.2455, 1.999844  
50235, 17382, 800.1836, 1.999689  
50236, 18074, 800.1217, 1.999534  
50237, 18902, 800.0597, 1.999380  
50238, 19788, 799.9978, 1.999225  
50239, 20670, 799.9359, 1.999070  
50240, 21346, 799.8739, 1.998915  
50241, 21590, 799.8120, 1.998761  
50242, 21360, 799.7501, 1.998606  
50243, 20898, 799.6882, 1.998451  
50244, 20496, 799.6262, 1.998296  
50245, 20204, 799.5643, 1.998141  
50246, 19814, 799.5024, 1.997987  
50247, 19126, 799.4405, 1.997832  
50248, 18254, 799.3785, 1.997677  
50249, 17554, 799.3166, 1.997522  
50250, 17298, 799.2547, 1.997368  
50251, 17426, 799.1927, 1.997213  
50252, 17700, 799.1308, 1.997058  
50253, 18016, 799.0689, 1.996903  
50254, 18516, 799.0070, 1.996749  
50255, 19348, 798.9450, 1.996594  
50256, 20362, 798.8831, 1.996439  
50257, 21136, 798.8212, 1.996284  
50258, 21356, 798.7593, 1.996130  
50259, 21100, 798.6973, 1.995975  
50260, 20726, 798.6354, 1.995820  
50261, 20530, 798.5735, 1.995665  
50262, 20498, 798.5116, 1.995511  
50263, 20474, 798.4496, 1.995356  
50264, 20466, 798.3877, 1.995201  
50265, 20658, 798.3258, 1.995046  
50266, 21130, 798.2638, 1.994892  
50267, 21636, 798.2019, 1.994737  
50268, 21768, 798.1400, 1.994582  
50269, 21378, 798.0781, 1.994427  
50270, 20778, 798.0161, 1.994273

50271, 20410, 797.9542, 1.994118  
50272, 20400, 797.8923, 1.993963  
50273, 20424, 797.8304, 1.993808  
50274, 20132, 797.7684, 1.993654  
50275, 19602, 797.7065, 1.993499  
50276, 19278, 797.6446, 1.993344  
50277, 19450, 797.5826, 1.993189  
50278, 19874, 797.5207, 1.993034  
50279, 19960, 797.4588, 1.992880  
50280, 19404, 797.3969, 1.992725  
50281, 18558, 797.3349, 1.992570  
50282, 18100, 797.2730, 1.992415  
50283, 18374, 797.2111, 1.992261  
50284, 19112, 797.1492, 1.992106  
50285, 19772, 797.0872, 1.991951  
50286, 20150, 797.0253, 1.991796  
50287, 20486, 796.9634, 1.991642  
50288, 21092, 796.9015, 1.991487  
50289, 21890, 796.8395, 1.991332  
50290, 22460, 796.7776, 1.991177  
50291, 22482, 796.7157, 1.991023  
50292, 22064, 796.6537, 1.990868  
50293, 21564, 796.5918, 1.990713  
50294, 21152, 796.5299, 1.990558  
50295, 20656, 796.4680, 1.990404  
50296, 19906, 796.4060, 1.990249  
50297, 19094, 796.3441, 1.990094  
50298, 18752, 796.2822, 1.989939  
50299, 19244, 796.2203, 1.989785  
50300, 20402, 796.1583, 1.989630  
50301, 21652, 796.0964, 1.989475  
50302, 22520, 796.0345, 1.989320  
50303, 22944, 795.9725, 1.989166  
50304, 23106, 795.9106, 1.989011  
50305, 23046, 795.8487, 1.988856  
50306, 22596, 795.7868, 1.988701  
50307, 21670, 795.7248, 1.988547  
50308, 20588, 795.6629, 1.988392  
50309, 19922, 795.6010, 1.988237  
50310, 20020, 795.5391, 1.988082  
50311, 20720, 795.4771, 1.987927  
50312, 21512, 795.4152, 1.987773  
50313, 22044, 795.3533, 1.987618  
50314, 22352, 795.2914, 1.987463  
50315, 22638, 795.2294, 1.987308  
50316, 22920, 795.1675, 1.987154  
50317, 22998, 795.1056, 1.986999  
50318, 22754, 795.0436, 1.986844  
50319, 22404, 794.9817, 1.986689  
50320, 22334, 794.9198, 1.986535  
50321, 22686, 794.8579, 1.986380  
50322, 23214, 794.7959, 1.986225  
50323, 23542, 794.7340, 1.986070  
50324, 23526, 794.6721, 1.985916  
50325, 23372, 794.6102, 1.985761  
50326, 23262, 794.5482, 1.985606  
50327, 23114, 794.4863, 1.985451  
50328, 22670, 794.4244, 1.985297  
50329, 21900, 794.3625, 1.985142  
50330, 21168, 794.3005, 1.984987  
50331, 20908, 794.2386, 1.984832  
50332, 21198, 794.1767, 1.984678  
50333, 21612, 794.1147, 1.984523  
50334, 21662, 794.0528, 1.984368  
50335, 21244, 793.9909, 1.984213  
50336, 20676, 793.9290, 1.984059  
50337, 20270, 793.8670, 1.983904  
50338, 19990, 793.8051, 1.983749  
50339, 19562, 793.7432, 1.983594  
50340, 18908, 793.6813, 1.983440  
50341, 18370, 793.6193, 1.983285  
50342, 18416, 793.5574, 1.983130  
50343, 19156, 793.4955, 1.982975  
50344, 20170, 793.4335, 1.982820  
50345, 20892, 793.3716, 1.982666  
50346, 21090, 793.3097, 1.982511

|                                  |                                  |                                  |
|----------------------------------|----------------------------------|----------------------------------|
| 50347, 20960, 793.2478, 1.982356 | 50423, 18164, 788.5413, 1.970595 | 50499, 19370, 783.8349, 1.958833 |
| 50348, 20840, 793.1858, 1.982201 | 50424, 18098, 788.4794, 1.970440 | 50500, 18788, 783.7729, 1.958678 |
| 50349, 20852, 793.1239, 1.982047 | 50425, 17648, 788.4175, 1.970285 | 50501, 18112, 783.7110, 1.958524 |
| 50350, 20932, 793.0620, 1.981892 | 50426, 17094, 788.3555, 1.970130 | 50502, 17444, 783.6491, 1.958369 |
| 50351, 21052, 793.0001, 1.981737 | 50427, 16906, 788.2936, 1.969976 | 50503, 16992, 783.5872, 1.958214 |
| 50352, 21324, 792.9381, 1.981582 | 50428, 17424, 788.2317, 1.969821 | 50504, 16956, 783.5252, 1.958059 |
| 50353, 21818, 792.8762, 1.981428 | 50429, 18504, 788.1698, 1.969666 | 50505, 17360, 783.4633, 1.957904 |
| 50354, 22328, 792.8143, 1.981273 | 50430, 19550, 788.1078, 1.969511 | 50506, 18022, 783.4014, 1.957750 |
| 50355, 22488, 792.7524, 1.981118 | 50431, 19966, 788.0459, 1.969357 | 50507, 18692, 783.3395, 1.957595 |
| 50356, 22094, 792.6904, 1.980963 | 50432, 19654, 787.9840, 1.969202 | 50508, 19256, 783.2775, 1.957440 |
| 50357, 21360, 792.6285, 1.980809 | 50433, 19050, 787.9221, 1.969047 | 50509, 19744, 783.2156, 1.957285 |
| 50358, 20732, 792.5666, 1.980654 | 50434, 18678, 787.8601, 1.968892 | 50510, 20196, 783.1537, 1.957131 |
| 50359, 20472, 792.5046, 1.980499 | 50435, 18650, 787.7982, 1.968738 | 50511, 20558, 783.0918, 1.956976 |
| 50360, 20468, 792.4427, 1.980344 | 50436, 18668, 787.7363, 1.968583 | 50512, 20734, 783.0298, 1.956821 |
| 50361, 20438, 792.3808, 1.980190 | 50437, 18414, 787.6743, 1.968428 | 50513, 20782, 782.9679, 1.956666 |
| 50362, 20280, 792.3189, 1.980035 | 50438, 17924, 787.6124, 1.968273 | 50514, 20870, 782.9060, 1.956512 |
| 50363, 20182, 792.2569, 1.979880 | 50439, 17510, 787.5505, 1.968119 | 50515, 21120, 782.8440, 1.956357 |
| 50364, 20338, 792.1950, 1.979725 | 50440, 17352, 787.4886, 1.967964 | 50516, 21416, 782.7821, 1.956202 |
| 50365, 20680, 792.1331, 1.979571 | 50441, 17300, 787.4266, 1.967809 | 50517, 21492, 782.7202, 1.956047 |
| 50366, 20932, 792.0712, 1.979416 | 50442, 17080, 787.3647, 1.967654 | 50518, 21222, 782.6583, 1.955893 |
| 50367, 20912, 792.0092, 1.979261 | 50443, 16684, 787.3028, 1.967499 | 50519, 20802, 782.5963, 1.955738 |
| 50368, 20742, 791.9473, 1.979106 | 50444, 16438, 787.2409, 1.967345 | 50520, 20566, 782.5344, 1.955583 |
| 50369, 20648, 791.8854, 1.978952 | 50445, 16642, 787.1789, 1.967190 | 50521, 20640, 782.4725, 1.955428 |
| 50370, 20670, 791.8234, 1.978797 | 50446, 17200, 787.1170, 1.967035 | 50522, 20812, 782.4106, 1.955274 |
| 50371, 20552, 791.7615, 1.978642 | 50447, 17686, 787.0551, 1.966880 | 50523, 20744, 782.3486, 1.955119 |
| 50372, 20084, 791.6996, 1.978487 | 50448, 17778, 786.9931, 1.966726 | 50524, 20402, 782.2867, 1.954964 |
| 50373, 19378, 791.6377, 1.978333 | 50449, 17574, 786.9312, 1.966571 | 50525, 20138, 782.2248, 1.954809 |
| 50374, 18846, 791.5757, 1.978178 | 50450, 17450, 786.8693, 1.966416 | 50526, 20390, 782.1629, 1.954655 |
| 50375, 18792, 791.5138, 1.978023 | 50451, 17594, 786.8074, 1.966261 | 50527, 21280, 782.1009, 1.954500 |
| 50376, 19132, 791.4519, 1.977868 | 50452, 17802, 786.7454, 1.966107 | 50528, 22490, 782.0390, 1.954345 |
| 50377, 19480, 791.3900, 1.977713 | 50453, 17746, 786.6835, 1.965952 | 50529, 23586, 781.9771, 1.954190 |
| 50378, 19590, 791.3280, 1.977559 | 50454, 17408, 786.6216, 1.965797 | 50530, 24408, 781.9151, 1.954036 |
| 50379, 19566, 791.2661, 1.977404 | 50455, 17152, 786.5597, 1.965642 | 50531, 25186, 781.8532, 1.953881 |
| 50380, 19730, 791.2042, 1.977249 | 50456, 17342, 786.4977, 1.965488 | 50532, 26338, 781.7913, 1.953726 |
| 50381, 20200, 791.1423, 1.977094 | 50457, 17926, 786.4358, 1.965333 | 50533, 28194, 781.7294, 1.953571 |
| 50382, 20740, 791.0803, 1.976940 | 50458, 18434, 786.3739, 1.965178 | 50534, 30862, 781.6674, 1.953417 |
| 50383, 20978, 791.0184, 1.976785 | 50459, 18448, 786.3120, 1.965023 | 50535, 34234, 781.6055, 1.953262 |
| 50384, 20730, 790.9565, 1.976630 | 50460, 18014, 786.2500, 1.964869 | 50536, 38008, 781.5436, 1.953107 |
| 50385, 20128, 790.8945, 1.976475 | 50461, 17568, 786.1881, 1.964714 | 50537, 41694, 781.4817, 1.952952 |
| 50386, 19462, 790.8326, 1.976321 | 50462, 17486, 786.1262, 1.964559 | 50538, 44746, 781.4197, 1.952797 |
| 50387, 18960, 790.7707, 1.976166 | 50463, 17762, 786.0642, 1.964404 | 50539, 46840, 781.3578, 1.952643 |
| 50388, 18742, 790.7088, 1.976011 | 50464, 18088, 786.0023, 1.964250 | 50540, 48068, 781.2959, 1.952488 |
| 50389, 18868, 790.6468, 1.975856 | 50465, 18210, 785.9404, 1.964095 | 50541, 48808, 781.2339, 1.952333 |
| 50390, 19330, 790.5849, 1.975702 | 50466, 18154, 785.8785, 1.963940 | 50542, 49376, 781.1720, 1.952178 |
| 50391, 19994, 790.5230, 1.975547 | 50467, 18118, 785.8165, 1.963785 | 50543, 49754, 781.1101, 1.952024 |
| 50392, 20590, 790.4611, 1.975392 | 50468, 18242, 785.7546, 1.963631 | 50544, 49712, 781.0482, 1.951869 |
| 50393, 20918, 790.3991, 1.975237 | 50469, 18522, 785.6927, 1.963476 | 50545, 49184, 780.9862, 1.951714 |
| 50394, 21048, 790.3372, 1.975083 | 50470, 18906, 785.6308, 1.963321 | 50546, 48434, 780.9243, 1.951559 |
| 50395, 21274, 790.2753, 1.974928 | 50471, 19368, 785.5688, 1.963166 | 50547, 47854, 780.8624, 1.951405 |
| 50396, 21766, 790.2133, 1.974773 | 50472, 19816, 785.5069, 1.963011 | 50548, 47526, 780.8005, 1.951250 |
| 50397, 22326, 790.1514, 1.974618 | 50473, 20020, 785.4450, 1.962857 | 50549, 47134, 780.7385, 1.951095 |
| 50398, 22530, 790.0895, 1.974464 | 50474, 19734, 785.3830, 1.962702 | 50550, 46344, 780.6766, 1.950940 |
| 50399, 22158, 790.0276, 1.974309 | 50475, 18974, 785.3211, 1.962547 | 50551, 45232, 780.6147, 1.950786 |
| 50400, 21482, 789.9656, 1.974154 | 50476, 18132, 785.2592, 1.962392 | 50552, 44294, 780.5528, 1.950631 |
| 50401, 21062, 789.9037, 1.973999 | 50477, 17744, 785.1973, 1.962238 | 50553, 43962, 780.4908, 1.950476 |
| 50402, 21194, 789.8418, 1.973845 | 50478, 18036, 785.1353, 1.962083 | 50554, 44142, 780.4289, 1.950321 |
| 50403, 21642, 789.7799, 1.973690 | 50479, 18764, 785.0734, 1.961928 | 50555, 44280, 780.3670, 1.950167 |
| 50404, 21858, 789.7179, 1.973535 | 50480, 19480, 785.0115, 1.961773 | 50556, 43934, 780.3050, 1.950012 |
| 50405, 21538, 789.6560, 1.973380 | 50481, 19964, 784.9496, 1.961619 | 50557, 43192, 780.2431, 1.949857 |
| 50406, 20902, 789.5941, 1.973226 | 50482, 20388, 784.8876, 1.961464 | 50558, 42548, 780.1812, 1.949702 |
| 50407, 20424, 789.5322, 1.973071 | 50483, 21040, 784.8257, 1.961309 | 50559, 42362, 780.1193, 1.949548 |
| 50408, 20384, 789.4702, 1.972916 | 50484, 21930, 784.7638, 1.961154 | 50560, 42498, 780.0573, 1.949393 |
| 50409, 20652, 789.4083, 1.972761 | 50485, 22698, 784.7019, 1.961000 | 50561, 42520, 779.9954, 1.949238 |
| 50410, 20926, 789.3464, 1.972606 | 50486, 22942, 784.6399, 1.960845 | 50562, 42180, 779.9335, 1.949083 |
| 50411, 21070, 789.2844, 1.972452 | 50487, 22544, 784.5780, 1.960690 | 50563, 41616, 779.8716, 1.948929 |
| 50412, 21162, 789.2225, 1.972297 | 50488, 21736, 784.5161, 1.960535 | 50564, 41092, 779.8096, 1.948774 |
| 50413, 21236, 789.1606, 1.972142 | 50489, 20842, 784.4541, 1.960381 | 50565, 40646, 779.7477, 1.948619 |
| 50414, 21116, 789.0987, 1.971987 | 50490, 20022, 784.3922, 1.960226 | 50566, 40070, 779.6858, 1.948464 |
| 50415, 20510, 789.0367, 1.971833 | 50491, 19298, 784.3303, 1.960071 | 50567, 39268, 779.6238, 1.948310 |
| 50416, 19372, 788.9748, 1.971678 | 50492, 18726, 784.2684, 1.959916 | 50568, 38528, 779.5619, 1.948155 |
| 50417, 18038, 788.9129, 1.971523 | 50493, 18470, 784.2064, 1.959762 | 50569, 38300, 779.5000, 1.948000 |
| 50418, 17004, 788.8510, 1.971368 | 50494, 18636, 784.1445, 1.959607 | 50570, 38722, 779.4381, 1.947845 |
| 50419, 16592, 788.7890, 1.971214 | 50495, 19126, 784.0826, 1.959452 | 50571, 39424, 779.3761, 1.947690 |
| 50420, 16778, 788.7271, 1.971059 | 50496, 19640, 784.0207, 1.959297 | 50572, 39798, 779.3142, 1.947536 |
| 50421, 17294, 788.6652, 1.970904 | 50497, 19886, 783.9587, 1.959143 | 50573, 39552, 779.2523, 1.947381 |
| 50422, 17842, 788.6032, 1.970749 | 50498, 19772, 783.8968, 1.958988 | 50574, 38900, 779.1904, 1.947226 |

50575, 38284, 779.1284, 1.947071  
50576, 37934, 779.0665, 1.946917  
50577, 37742, 779.0046, 1.946762  
50578, 37508, 778.9427, 1.946607  
50579, 37146, 778.8807, 1.946452  
50580, 36660, 778.8188, 1.946298  
50581, 35978, 778.7569, 1.946143  
50582, 34918, 778.6949, 1.945988  
50583, 33462, 778.6330, 1.945833  
50584, 31934, 778.5711, 1.945679  
50585, 30836, 778.5092, 1.945524  
50586, 30414, 778.4472, 1.945369  
50587, 30422, 778.3853, 1.945214  
50588, 30406, 778.3234, 1.945060  
50589, 30134, 778.2615, 1.944905  
50590, 29820, 778.1995, 1.944750  
50591, 29756, 778.1376, 1.944595  
50592, 29898, 778.0757, 1.944441  
50593, 29802, 778.0137, 1.944286  
50594, 29064, 777.9518, 1.944131  
50595, 27766, 777.8899, 1.943976  
50596, 26462, 777.8280, 1.943822  
50597, 25692, 777.7660, 1.943667  
50598, 25554, 777.7041, 1.943512  
50599, 25774, 777.6422, 1.943357  
50600, 26088, 777.5803, 1.943203  
50601, 26482, 777.5183, 1.943048  
50602, 27032, 777.4564, 1.942893  
50603, 27600, 777.3945, 1.942738  
50604, 27812, 777.3326, 1.942583  
50605, 27414, 777.2706, 1.942429  
50606, 26590, 777.2087, 1.942274  
50607, 25890, 777.1468, 1.942119  
50608, 25746, 777.0848, 1.941964  
50609, 26112, 777.0229, 1.941810  
50610, 26550, 776.9610, 1.941655  
50611, 26636, 776.8991, 1.941500  
50612, 26292, 776.8371, 1.941345  
50613, 25770, 776.7752, 1.941191  
50614, 25380, 776.7133, 1.941036  
50615, 25310, 776.6514, 1.940881  
50616, 25602, 776.5894, 1.940726  
50617, 26212, 776.5275, 1.940572  
50618, 26954, 776.4656, 1.940417  
50619, 27482, 776.4036, 1.940262  
50620, 27452, 776.3417, 1.940107  
50621, 26790, 776.2798, 1.939953  
50622, 25812, 776.2179, 1.939798  
50623, 25000, 776.1559, 1.939643  
50624, 24568, 776.0940, 1.939488  
50625, 24296, 776.0321, 1.939334  
50626, 23786, 775.9702, 1.939179  
50627, 22890, 775.9082, 1.939024  
50628, 21868, 775.8463, 1.938869  
50629, 21078, 775.7844, 1.938715  
50630, 20586, 775.7225, 1.938560  
50631, 20114, 775.6605, 1.938405  
50632, 19390, 775.5986, 1.938250  
50633, 18510, 775.5367, 1.938096  
50634, 17916, 775.4747, 1.937941  
50635, 17996, 775.4128, 1.937786  
50636, 18716, 775.3509, 1.937631  
50637, 19668, 775.2890, 1.937476  
50638, 20436, 775.2270, 1.937322  
50639, 20878, 775.1651, 1.937167  
50640, 21114, 775.1032, 1.937012  
50641, 21274, 775.0413, 1.936857  
50642, 21372, 774.9793, 1.936703  
50643, 21368, 774.9174, 1.936548  
50644, 21264, 774.8555, 1.936393  
50645, 21124, 774.7935, 1.936238  
50646, 20988, 774.7316, 1.936084  
50647, 20854, 774.6697, 1.935929  
50648, 20760, 774.6078, 1.935774  
50649, 20850, 774.5458, 1.935619  
50650, 21240, 774.4839, 1.935465

50651, 21832, 774.4220, 1.935310  
50652, 22318, 774.3601, 1.935155  
50653, 22452, 774.2981, 1.935000  
50654, 22320, 774.2362, 1.934846  
50655, 22280, 774.1743, 1.934691  
50656, 22610, 774.1124, 1.934536  
50657, 23188, 774.0504, 1.934381  
50658, 23578, 773.9885, 1.934227  
50659, 23460, 773.9266, 1.934072  
50660, 22946, 773.8646, 1.933917  
50661, 22472, 773.8027, 1.933762  
50662, 22406, 773.7408, 1.933608  
50663, 22742, 773.6789, 1.933453  
50664, 23228, 773.6169, 1.933298  
50665, 23676, 773.5550, 1.933143  
50666, 24082, 773.4931, 1.932989  
50667, 24480, 773.4312, 1.932834  
50668, 24760, 773.3692, 1.932679  
50669, 24704, 773.3073, 1.932524  
50670, 24262, 773.2454, 1.932369  
50671, 23666, 773.1834, 1.932215  
50672, 23258, 773.1215, 1.932060  
50673, 23194, 773.0596, 1.931905  
50674, 23358, 772.9977, 1.931750  
50675, 23594, 772.9357, 1.931596  
50676, 23946, 772.8738, 1.931441  
50677, 24588, 772.8119, 1.931286  
50678, 25462, 772.7500, 1.931131  
50679, 26128, 772.6880, 1.930977  
50680, 26048, 772.6261, 1.930822  
50681, 25056, 772.5642, 1.930667  
50682, 23614, 772.5023, 1.930512  
50683, 22456, 772.4403, 1.930358  
50684, 22052, 772.3784, 1.930203  
50685, 22296, 772.3165, 1.930048  
50686, 22758, 772.2545, 1.929893  
50687, 23114, 772.1926, 1.929739  
50688, 23344, 772.1307, 1.929584  
50689, 23562, 772.0688, 1.929429  
50690, 23784, 772.0068, 1.929274  
50691, 23904, 771.9449, 1.929120  
50692, 23858, 771.8830, 1.928965  
50693, 23712, 771.8211, 1.928810  
50694, 23512, 771.7591, 1.928655  
50695, 23156, 771.6972, 1.928501  
50696, 22488, 771.6353, 1.928346  
50697, 21584, 771.5733, 1.928191  
50698, 20844, 771.5114, 1.928036  
50699, 20704, 771.4495, 1.927882  
50700, 21200, 771.3876, 1.927727  
50701, 21830, 771.3256, 1.927572  
50702, 21988, 771.2637, 1.927417  
50703, 21480, 771.2018, 1.927262  
50704, 20732, 771.1399, 1.927108  
50705, 20336, 771.0779, 1.926953  
50706, 20552, 771.0160, 1.926798  
50707, 21152, 770.9541, 1.926643  
50708, 21770, 770.8922, 1.926489  
50709, 22328, 770.8302, 1.926334  
50710, 23032, 770.7683, 1.926179  
50711, 24000, 770.7064, 1.926024  
50712, 24982, 770.6444, 1.925870  
50713, 25512, 770.5825, 1.925715  
50714, 25368, 770.5206, 1.925560  
50715, 24804, 770.4587, 1.925405  
50716, 24338, 770.3967, 1.925251  
50717, 24266, 770.3348, 1.925096  
50718, 24428, 770.2729, 1.924941  
50719, 24450, 770.2110, 1.924786  
50720, 24174, 770.1490, 1.924632  
50721, 23836, 770.0871, 1.924477  
50722, 23826, 770.0252, 1.924322  
50723, 24300, 769.9632, 1.924167  
50724, 25000, 769.9013, 1.924013  
50725, 25460, 769.8394, 1.923858  
50726, 25362, 769.7775, 1.923703

50727, 24748, 769.7155, 1.923548  
50728, 23932, 769.6536, 1.923394  
50729, 23272, 769.5917, 1.923239  
50730, 22942, 769.5298, 1.923084  
50731, 22886, 769.4678, 1.922929  
50732, 22922, 769.4059, 1.922775  
50733, 22894, 769.3440, 1.922620  
50734, 22786, 769.2821, 1.922465  
50735, 22672, 769.2201, 1.922310  
50736, 22612, 769.1582, 1.922155  
50737, 22518, 769.0963, 1.922001  
50738, 22216, 769.0343, 1.921846  
50739, 21622, 768.9724, 1.921691  
50740, 20912, 768.9105, 1.921536  
50741, 20458, 768.8486, 1.921382  
50742, 20560, 768.7866, 1.921227  
50743, 21174, 768.7247, 1.921072  
50744, 21946, 768.6628, 1.920917  
50745, 22472, 768.6009, 1.920763  
50746, 22638, 768.5389, 1.920608  
50747, 22614, 768.4770, 1.920453  
50748, 22636, 768.4151, 1.920298  
50749, 22770, 768.3532, 1.920144  
50750, 22882, 768.2912, 1.919989  
50751, 22836, 768.2293, 1.919834  
50752, 22616, 768.1674, 1.919679  
50753, 22290, 768.1054, 1.919525  
50754, 21866, 768.0435, 1.919370  
50755, 21262, 767.9816, 1.919215  
50756, 20474, 767.9197, 1.919060  
50757, 19678, 767.8577, 1.918906  
50758, 19158, 767.7958, 1.918751  
50759, 19076, 767.7339, 1.918596  
50760, 19354, 767.6720, 1.918441  
50761, 19798, 767.6100, 1.918287  
50762, 20316, 767.5481, 1.918132  
50763, 20962, 767.4862, 1.917977  
50764, 21774, 767.4242, 1.917822  
50765, 22568, 767.3623, 1.917667  
50766, 23016, 767.3004, 1.917513  
50767, 22890, 767.2385, 1.917358  
50768, 22314, 767.1765, 1.917203  
50769, 21662, 767.1146, 1.917048  
50770, 21278, 767.0527, 1.916894  
50771, 21232, 766.9908, 1.916739  
50772, 21340, 766.9288, 1.916584  
50773, 21384, 766.8669, 1.916429  
50774, 21246, 766.8050, 1.916275  
50775, 20954, 766.7431, 1.916120  
50776, 20588, 766.6811, 1.915965  
50777, 20296, 766.6192, 1.915810  
50778, 20274, 766.5573, 1.915656  
50779, 20692, 766.4953, 1.915501  
50780, 21456, 766.4334, 1.915346  
50781, 22242, 766.3715, 1.915191  
50782, 22672, 766.3096, 1.915037  
50783, 22662, 766.2476, 1.914882  
50784, 22534, 766.1857, 1.914727  
50785, 22698, 766.1238, 1.914572  
50786, 23256, 766.0619, 1.914418  
50787, 23874, 765.9999, 1.914263  
50788, 24114, 765.9380, 1.914108  
50789, 23874, 765.8761, 1.913953  
50790, 23466, 765.8141, 1.913799  
50791, 23296, 765.7522, 1.913644  
50792, 23412, 765.6903, 1.913489  
50793, 23506, 765.6284, 1.913334  
50794, 23272, 765.5664, 1.913180  
50795, 22744, 765.5045, 1.913025  
50796, 22250, 765.4426, 1.912870  
50797, 22026, 765.3807, 1.912715  
50798, 21992, 765.3187, 1.912560  
50799, 21912, 765.2568, 1.912406  
50800, 21716, 765.1949, 1.912251  
50801, 21642, 765.1330, 1.912096  
50802, 21974, 765.0710, 1.911941

50803, 22710, 765.0091, 1.911787  
50804, 23522, 764.9472, 1.911632  
50805, 24070, 764.8852, 1.911477  
50806, 24274, 764.8233, 1.911322  
50807, 24294, 764.7614, 1.911168  
50808, 24272, 764.6995, 1.911013  
50809, 24186, 764.6375, 1.910858  
50810, 23960, 764.5756, 1.910703  
50811, 23680, 764.5137, 1.910549  
50812, 23558, 764.4518, 1.910394  
50813, 23706, 764.3898, 1.910239  
50814, 23964, 764.3279, 1.910084  
50815, 24062, 764.2660, 1.909930  
50816, 23904, 764.2040, 1.909775  
50817, 23688, 764.1421, 1.909620  
50818, 23656, 764.0802, 1.909465  
50819, 23754, 764.0183, 1.909311  
50820, 23670, 763.9563, 1.909156  
50821, 23168, 763.8944, 1.909001  
50822, 22456, 763.8325, 1.908846  
50823, 22040, 763.7706, 1.908692  
50824, 22282, 763.7086, 1.908537  
50825, 23002, 763.6467, 1.908382  
50826, 23644, 763.5848, 1.908227  
50827, 23786, 763.5229, 1.908073  
50828, 23484, 763.4609, 1.907918  
50829, 23116, 763.3990, 1.907763  
50830, 22990, 763.3371, 1.907608  
50831, 23074, 763.2751, 1.907453  
50832, 23164, 763.2132, 1.907299  
50833, 23170, 763.1513, 1.907144  
50834, 23238, 763.0894, 1.906989  
50835, 23502, 763.0274, 1.906834  
50836, 23900, 762.9655, 1.906680  
50837, 24176, 762.9036, 1.906525  
50838, 24124, 762.8417, 1.906370  
50839, 23756, 762.7797, 1.906215  
50840, 23234, 762.7178, 1.906061  
50841, 22698, 762.6559, 1.905906  
50842, 22186, 762.5939, 1.905751  
50843, 21750, 762.5320, 1.905596  
50844, 21496, 762.4701, 1.905442  
50845, 21522, 762.4082, 1.905287  
50846, 21746, 762.3462, 1.905132  
50847, 21924, 762.2843, 1.904977  
50848, 21850, 762.2224, 1.904823  
50849, 21542, 762.1605, 1.904668  
50850, 21192, 762.0985, 1.904513  
50851, 20930, 762.0366, 1.904358  
50852, 20688, 761.9747, 1.904204  
50853, 20306, 761.9128, 1.904049  
50854, 19792, 761.8508, 1.903894  
50855, 19360, 761.7889, 1.903739  
50856, 19250, 761.7270, 1.903585  
50857, 19478, 761.6650, 1.903430  
50858, 19866, 761.6031, 1.903275  
50859, 20226, 761.5412, 1.903120  
50860, 20532, 761.4793, 1.902966  
50861, 20836, 761.4173, 1.902811  
50862, 21068, 761.3554, 1.902656  
50863, 21048, 761.2935, 1.902501  
50864, 20714, 761.2316, 1.902346  
50865, 20302, 761.1696, 1.902192  
50866, 20202, 761.1077, 1.902037  
50867, 20584, 761.0458, 1.901882  
50868, 21164, 760.9838, 1.901727  
50869, 21470, 760.9219, 1.901573  
50870, 21282, 760.8600, 1.901418  
50871, 20852, 760.7981, 1.901263  
50872, 20624, 760.7361, 1.901108  
50873, 20788, 760.6742, 1.900954  
50874, 21118, 760.6123, 1.900799  
50875, 21302, 760.5504, 1.900644  
50876, 21286, 760.4884, 1.900489  
50877, 21298, 760.4265, 1.900335  
50878, 21488, 760.3646, 1.900180

50879, 21688, 760.3027, 1.900025  
50880, 21592, 760.2407, 1.899870  
50881, 21150, 760.1788, 1.899716  
50882, 20680, 760.1169, 1.899561  
50883, 20568, 760.0549, 1.899406  
50884, 20830, 759.9930, 1.899251  
50885, 21102, 759.9311, 1.899097  
50886, 21062, 759.8692, 1.898942  
50887, 20834, 759.8072, 1.898787  
50888, 20860, 759.7453, 1.898632  
50889, 21422, 759.6834, 1.898478  
50890, 22246, 759.6215, 1.898323  
50891, 22744, 759.5595, 1.898168  
50892, 22604, 759.4976, 1.898013  
50893, 22084, 759.4357, 1.897859  
50894, 21778, 759.3737, 1.897704  
50895, 22014, 759.3118, 1.897549  
50896, 22618, 759.2499, 1.897394  
50897, 23152, 759.1880, 1.897239  
50898, 23372, 759.1260, 1.897085  
50899, 23392, 759.0641, 1.896930  
50900, 23450, 759.0022, 1.896775  
50901, 23636, 758.9403, 1.896620  
50902, 23848, 758.8783, 1.896466  
50903, 23984, 758.8164, 1.896311  
50904, 24040, 758.7545, 1.896156  
50905, 23994, 758.6926, 1.896001  
50906, 23738, 758.6306, 1.895847  
50907, 23182, 758.5687, 1.895692  
50908, 22476, 758.5068, 1.895537  
50909, 22022, 758.4448, 1.895382  
50910, 22152, 758.3829, 1.895228  
50911, 22730, 758.3210, 1.895073  
50912, 23256, 758.2591, 1.894918  
50913, 23288, 758.1971, 1.894763  
50914, 22898, 758.1352, 1.894609  
50915, 22568, 758.0733, 1.894454  
50916, 22676, 758.0114, 1.894299  
50917, 23104, 757.9494, 1.894144  
50918, 23402, 757.8875, 1.893990  
50919, 23318, 757.8256, 1.893835  
50920, 23080, 757.7636, 1.893680  
50921, 23112, 757.7017, 1.893525  
50922, 23494, 757.6398, 1.893371  
50923, 23824, 757.5779, 1.893216  
50924, 23636, 757.5159, 1.893061  
50925, 22944, 757.4540, 1.892906  
50926, 22302, 757.3921, 1.892752  
50927, 22292, 757.3302, 1.892597  
50928, 20928, 757.2682, 1.892442  
50929, 23902, 757.2063, 1.892287  
50930, 24510, 757.1444, 1.892132  
50931, 24638, 757.0825, 1.891978  
50932, 24478, 757.0205, 1.891823  
50933, 24204, 756.9586, 1.891668  
50934, 23750, 756.8967, 1.891513  
50935, 22942, 756.8347, 1.891359  
50936, 21872, 756.7728, 1.891204  
50937, 20942, 756.7109, 1.891049  
50938, 20594, 756.6490, 1.890894  
50939, 20934, 756.5870, 1.890740  
50940, 21688, 756.5251, 1.890585  
50941, 22430, 756.4632, 1.890430  
50942, 22864, 756.4013, 1.890275  
50943, 22928, 756.3393, 1.890121  
50944, 22710, 756.2774, 1.889966  
50945, 22396, 756.2155, 1.889811  
50946, 22258, 756.1535, 1.889656  
50947, 22560, 756.0916, 1.889502  
50948, 23340, 756.0297, 1.889347  
50949, 24272, 755.9678, 1.889192  
50950, 24832, 755.9058, 1.889037  
50951, 24720, 755.8439, 1.888883  
50952, 24116, 755.7820, 1.888728  
50953, 23534, 755.7201, 1.888573  
50954, 23328, 755.6581, 1.888418

50955, 23400, 755.5962, 1.888264  
50956, 23358, 755.5343, 1.888109  
50957, 23000, 755.4724, 1.887954  
50958, 22520, 755.4104, 1.887799  
50959, 22312, 755.3485, 1.887645  
50960, 22510, 755.2866, 1.887490  
50961, 22846, 755.2246, 1.887335  
50962, 22980, 755.1627, 1.887180  
50963, 22832, 755.1008, 1.887025  
50964, 22674, 755.0389, 1.886871  
50965, 22776, 754.9769, 1.886716  
50966, 23102, 754.9150, 1.886561  
50967, 23380, 754.8531, 1.886406  
50968, 23412, 754.7912, 1.886252  
50969, 23290, 754.7292, 1.886097  
50970, 23266, 754.6673, 1.885942  
50971, 23452, 754.6054, 1.885787  
50972, 23674, 754.5435, 1.885633  
50973, 23724, 754.4815, 1.885478  
50974, 23530, 754.4196, 1.885323  
50975, 23220, 754.3577, 1.885168  
50976, 22912, 754.2957, 1.885014  
50977, 22570, 754.2338, 1.884859  
50978, 22102, 754.1719, 1.884704  
50979, 21564, 754.1100, 1.884549  
50980, 21174, 754.0480, 1.884395  
50981, 21140, 753.9861, 1.884240  
50982, 21442, 753.9242, 1.884085  
50983, 21912, 753.8623, 1.883930  
50984, 22416, 753.8003, 1.883776  
50985, 22960, 753.7384, 1.883621  
50986, 23572, 753.6765, 1.883466  
50987, 24120, 753.6145, 1.883311  
50988, 24346, 753.5526, 1.883157  
50989, 24128, 753.4907, 1.883002  
50990, 23648, 753.4288, 1.882847  
50991, 23224, 753.3668, 1.882692  
50992, 22992, 753.3049, 1.882538  
50993, 22764, 753.2430, 1.882383  
50994, 22286, 753.1811, 1.882228  
50995, 21564, 753.1191, 1.882073  
50996, 20956, 753.0572, 1.881918  
50997, 20808, 752.9953, 1.881764  
50998, 21090, 752.9334, 1.881609  
50999, 21422, 752.8714, 1.881454  
51000, 21430, 752.8095, 1.881299  
51001, 21120, 752.7476, 1.881145  
51002, 20808, 752.6856, 1.880990  
51003, 20754, 752.6237, 1.880835  
51004, 20944, 752.5618, 1.880680  
51005, 21230, 752.4999, 1.880526  
51006, 21608, 752.4379, 1.880371  
51007, 22264, 752.3760, 1.880216  
51008, 23288, 752.3141, 1.880061  
51009, 24440, 752.2522, 1.879907  
51010, 25248, 752.1902, 1.879752  
51011, 25396, 752.1283, 1.879597  
51012, 25000, 752.0664, 1.879442  
51013, 24418, 752.0044, 1.879288  
51014, 23864, 751.9425, 1.879133  
51015, 23246, 751.8806, 1.878978  
51016, 22370, 751.8187, 1.878823  
51017, 21336, 751.7567, 1.878669  
51018, 20500, 751.6948, 1.878514  
51019, 20160, 751.6329, 1.878359  
51020, 20246, 751.5710, 1.878204  
51021, 20414, 751.5090, 1.878050  
51022, 20478, 751.4471, 1.877895  
51023, 20626, 751.3852, 1.877740  
51024, 21216, 751.3233, 1.877585  
51025, 22312, 751.2613, 1.877431  
51026, 23554, 751.1994, 1.877276  
51027, 24396, 751.1375, 1.877121  
51028, 24616, 751.0755, 1.876966  
51029, 24388, 751.0136, 1.876811  
51030, 24006, 750.9517, 1.876657

51031, 23524, 750.8898, 1.876502  
51032, 22812, 750.8278, 1.876347  
51033, 21864, 750.7659, 1.876192  
51034, 21012, 750.7040, 1.876038  
51035, 20730, 750.6421, 1.875883  
51036, 21172, 750.5801, 1.875728  
51037, 22016, 750.5182, 1.875573  
51038, 22690, 750.4563, 1.875419  
51039, 22860, 750.3943, 1.875264  
51040, 22632, 750.3324, 1.875109  
51041, 22342, 750.2705, 1.874954  
51042, 22190, 750.2086, 1.874800  
51043, 22114, 750.1466, 1.874645  
51044, 21936, 750.0847, 1.874490  
51045, 21612, 750.0228, 1.874335  
51046, 22188, 749.9609, 1.874181  
51047, 21022, 749.8989, 1.874026  
51048, 20962, 749.8370, 1.873871  
51049, 21032, 749.7751, 1.873716  
51050, 21180, 749.7132, 1.873562  
51051, 21376, 749.6512, 1.873407  
51052, 21608, 749.5893, 1.873252  
51053, 21826, 749.5274, 1.873097  
51054, 22012, 749.4654, 1.872943  
51055, 22194, 749.4035, 1.872788  
51056, 22392, 749.3416, 1.872633  
51057, 22568, 749.2797, 1.872478  
51058, 22610, 749.2177, 1.872323  
51059, 22484, 749.1558, 1.872169  
51060, 22318, 749.0939, 1.872014  
51061, 22328, 749.0320, 1.871859  
51062, 22584, 748.9700, 1.871704  
51063, 22908, 748.9081, 1.871550  
51064, 23034, 748.8462, 1.871395  
51065, 22884, 748.7842, 1.871240  
51066, 22672, 748.7223, 1.871085  
51067, 22674, 748.6604, 1.870931  
51068, 22910, 748.5985, 1.870776  
51069, 23046, 748.5365, 1.870621  
51070, 22708, 748.4746, 1.870466  
51071, 21856, 748.4127, 1.870312  
51072, 20870, 748.3508, 1.870157  
51073, 20236, 748.2888, 1.870002  
51074, 20164, 748.2269, 1.869847  
51075, 20458, 748.1650, 1.869693  
51076, 20766, 748.1031, 1.869538  
51077, 20910, 748.0411, 1.869383  
51078, 20960, 747.9792, 1.869228  
51079, 21134, 747.9173, 1.869074  
51080, 21556, 747.8553, 1.868919  
51081, 22190, 747.7934, 1.868764  
51082, 22870, 747.7315, 1.868609  
51083, 23372, 747.6696, 1.868455  
51084, 23518, 747.6076, 1.868300  
51085, 23244, 747.5457, 1.868145  
51086, 22694, 747.4838, 1.867990  
51087, 22156, 747.4219, 1.867836  
51088, 21862, 747.3599, 1.867681  
51089, 21816, 747.2980, 1.867526  
51090, 21806, 747.2361, 1.867371  
51091, 21676, 747.1741, 1.867216  
51092, 21520, 747.1122, 1.867062  
51093, 21608, 747.0503, 1.866907  
51094, 22054, 746.9884, 1.866752  
51095, 22586, 746.9264, 1.866597  
51096, 22748, 746.8645, 1.866443  
51097, 22334, 746.8026, 1.866288  
51098, 21630, 746.7407, 1.866133  
51099, 21188, 746.6787, 1.865978  
51100, 21302, 746.6168, 1.865824  
51101, 21764, 746.5549, 1.865669  
51102, 22094, 746.4930, 1.865514  
51103, 22046, 746.4310, 1.865359  
51104, 21816, 746.3691, 1.865205  
51105, 21760, 746.3072, 1.865050  
51106, 22004, 746.2452, 1.864895

51107, 22328, 746.1833, 1.864740  
51108, 22490, 746.1214, 1.864586  
51109, 22502, 746.0595, 1.864431  
51110, 22608, 745.9975, 1.864276  
51111, 22970, 745.9356, 1.864121  
51112, 23486, 745.8737, 1.863967  
51113, 23952, 745.8118, 1.863812  
51114, 24328, 745.7498, 1.863657  
51115, 24766, 745.6879, 1.863502  
51116, 25294, 745.6260, 1.863348  
51117, 25632, 745.5640, 1.863193  
51118, 25352, 745.5021, 1.863038  
51119, 24396, 745.4402, 1.862883  
51120, 23270, 745.3783, 1.862729  
51121, 22720, 745.3163, 1.862574  
51122, 23080, 745.2544, 1.862419  
51123, 24004, 745.1925, 1.862264  
51124, 24786, 745.1306, 1.862109  
51125, 24976, 745.0686, 1.861955  
51126, 24622, 745.0067, 1.861800  
51127, 24018, 744.9448, 1.861645  
51128, 23306, 744.8829, 1.861490  
51129, 22442, 744.8209, 1.861336  
51130, 21504, 744.7590, 1.861181  
51131, 20844, 744.6971, 1.861026  
51132, 20862, 744.6351, 1.860871  
51133, 21522, 744.5732, 1.860717  
51134, 22258, 744.5113, 1.860562  
51135, 22428, 744.4494, 1.860407  
51136, 21918, 744.3874, 1.860252  
51137, 21264, 744.3255, 1.860098  
51138, 21122, 744.2636, 1.859943  
51139, 21664, 744.2017, 1.859788  
51140, 22454, 744.1397, 1.859633  
51141, 22954, 744.0778, 1.859479  
51142, 23052, 744.0159, 1.859324  
51143, 23084, 743.9539, 1.859169  
51144, 23410, 743.8920, 1.859014  
51145, 24008, 743.8301, 1.858860  
51146, 24548, 743.7682, 1.858705  
51147, 24754, 743.7062, 1.858550  
51148, 24678, 743.6443, 1.858395  
51149, 24560, 743.5824, 1.858241  
51150, 24496, 743.5205, 1.858086  
51151, 24360, 743.4585, 1.857931  
51152, 24020, 743.3966, 1.857776  
51153, 23558, 743.3347, 1.857622  
51154, 23270, 743.2728, 1.857467  
51155, 23376, 743.2108, 1.857312  
51156, 23794, 743.1489, 1.857157  
51157, 24220, 743.0870, 1.857002  
51158, 24402, 743.0250, 1.856848  
51159, 24276, 742.9631, 1.856693  
51160, 23974, 742.9012, 1.856538  
51161, 23638, 742.8393, 1.856383  
51162, 23380, 742.7773, 1.856229  
51163, 23296, 742.7154, 1.856074  
51164, 23462, 742.6535, 1.855919  
51165, 23850, 742.5916, 1.855764  
51166, 24288, 742.5296, 1.855610  
51167, 24558, 742.4677, 1.855455  
51168, 24554, 742.4058, 1.855300  
51169, 24378, 742.3439, 1.855145  
51170, 24208, 742.2819, 1.854991  
51171, 24102, 742.2200, 1.854836  
51172, 23972, 742.1581, 1.854681  
51173, 23742, 742.0961, 1.854526  
51174, 23520, 742.0342, 1.854372  
51175, 23490, 741.9723, 1.854217  
51176, 23706, 741.9104, 1.854062  
51177, 24006, 741.8484, 1.853907  
51178, 24146, 741.7865, 1.853753  
51179, 24090, 741.7246, 1.853598  
51180, 24028, 741.6627, 1.853443  
51181, 24160, 741.6007, 1.853288  
51182, 24410, 741.5388, 1.853134

51183, 24464, 741.4769, 1.852979  
51184, 24112, 741.4149, 1.852824  
51185, 23494, 741.3530, 1.852669  
51186, 23044, 741.2911, 1.852515  
51187, 23102, 741.2292, 1.852360  
51188, 23644, 741.1672, 1.852205  
51189, 24382, 741.1053, 1.852050  
51190, 25046, 741.0434, 1.851895  
51191, 25572, 740.9815, 1.851741  
51192, 26002, 740.9195, 1.851586  
51193, 26310, 740.8576, 1.851431  
51194, 26382, 740.7957, 1.851276  
51195, 26204, 740.7338, 1.851122  
51196, 25958, 740.6718, 1.850967  
51197, 25872, 740.6099, 1.850812  
51198, 25962, 740.5480, 1.850657  
51199, 25932, 740.4860, 1.850503  
51200, 25452, 740.4241, 1.850348  
51201, 24462, 740.3622, 1.850193  
51202, 23268, 740.3003, 1.850038  
51203, 22282, 740.2383, 1.849884  
51204, 21720, 740.1764, 1.849729  
51205, 21556, 740.1145, 1.849574  
51206, 21678, 740.0526, 1.849419  
51207, 22060, 739.9906, 1.849265  
51208, 22692, 739.9287, 1.849110  
51209, 23430, 739.8668, 1.848955  
51210, 23952, 739.8048, 1.848800  
51211, 23994, 739.7429, 1.848646  
51212, 23598, 739.6810, 1.848491  
51213, 23070, 739.6191, 1.848336  
51214, 22750, 739.5571, 1.848181  
51215, 22748, 739.4952, 1.848027  
51216, 22938, 739.4333, 1.847872  
51217, 23138, 739.3714, 1.847717  
51218, 23258, 739.3094, 1.847562  
51219, 23282, 739.2475, 1.847408  
51220, 23170, 739.1856, 1.847253  
51221, 22870, 739.1237, 1.847098  
51222, 22450, 739.0617, 1.846943  
51223, 22116, 738.9998, 1.846788  
51224, 22054, 738.9379, 1.846634  
51225, 22210, 738.8759, 1.846479  
51226, 22288, 738.8140, 1.846324  
51227, 22024, 738.7521, 1.846169  
51228, 21490, 738.6902, 1.846015  
51229, 21042, 738.6282, 1.845860  
51230, 21022, 738.5663, 1.845705  
51231, 21404, 738.5044, 1.845550  
51232, 21798, 738.4425, 1.845396  
51233, 21774, 738.3805, 1.845241  
51234, 21222, 738.3186, 1.845086  
51235, 20408, 738.2567, 1.844931  
51236, 19706, 738.1947, 1.844777  
51237, 19340, 738.1328, 1.844622  
51238, 19322, 738.0709, 1.844467  
51239, 19574, 738.0090, 1.844312  
51240, 20080, 737.9470, 1.844158  
51241, 20844, 737.8851, 1.844003  
51242, 21846, 737.8232, 1.843848  
51243, 22954, 737.7613, 1.843693  
51244, 23974, 737.6993, 1.843539  
51245, 24718, 737.6374, 1.843384  
51246, 25078, 737.5755, 1.843229  
51247, 25062, 737.5136, 1.843074  
51248, 24818, 737.4516, 1.842920  
51249, 24590, 737.3897, 1.842765  
51250, 24560, 737.3278, 1.842610  
51251, 24684, 737.2658, 1.842455  
51252, 24686, 737.2039, 1.842301  
51253, 24264, 737.1420, 1.842146  
51254, 23402, 737.0801, 1.841991  
51255, 22438, 737.0181, 1.841836  
51256, 21830, 736.9562, 1.841681  
51257, 21832, 736.8943, 1.841527  
51258, 22360, 736.8324, 1.841372

51259, 23154, 736.7704, 1.841217  
51260, 24006, 736.7085, 1.841062  
51261, 24818, 736.6466, 1.840908  
51262, 25458, 736.5846, 1.840753  
51263, 25672, 736.5227, 1.840598  
51264, 25266, 736.4608, 1.840443  
51265, 24328, 736.3989, 1.840289  
51266, 23300, 736.3369, 1.840134  
51267, 22664, 736.2750, 1.839979  
51268, 22542, 736.2131, 1.839824  
51269, 22672, 736.1512, 1.839670  
51270, 22708, 735.8462, 1.839515  
51271, 22618, 736.0273, 1.839360  
51272, 22692, 735.9654, 1.839205  
51273, 23168, 735.9035, 1.839051  
51274, 23938, 735.8415, 1.838896  
51275, 24584, 735.7796, 1.838741  
51276, 24794, 735.7177, 1.838586  
51277, 24612, 735.6557, 1.838432  
51278, 24374, 735.5938, 1.838277  
51279, 24312, 735.5319, 1.838122  
51280, 24356, 735.4700, 1.837967  
51281, 24260, 735.4080, 1.837813  
51282, 23920, 735.3461, 1.837658  
51283, 23488, 735.2842, 1.837503  
51284, 23234, 735.2223, 1.837348  
51285, 23288, 735.1603, 1.837194  
51286, 23572, 735.0984, 1.837039  
51287, 23922, 735.0365, 1.836884  
51288, 24222, 734.9745, 1.836729  
51289, 24438, 734.9126, 1.836574  
51290, 24558, 734.8507, 1.836420  
51291, 24630, 734.7888, 1.836265  
51292, 24760, 734.7268, 1.836110  
51293, 25060, 734.6649, 1.835955  
51294, 25446, 734.6030, 1.835801  
51295, 25604, 734.5411, 1.835646  
51296, 25182, 734.4791, 1.835491  
51297, 24210, 734.4172, 1.835336  
51298, 23208, 734.3553, 1.835182  
51299, 22886, 734.2934, 1.835027  
51300, 23552, 734.2314, 1.834872  
51301, 24794, 734.1695, 1.834717  
51302, 25816, 734.1076, 1.834563  
51303, 26054, 734.0456, 1.834408  
51304, 25558, 733.9837, 1.834253  
51305, 24798, 733.9218, 1.834098  
51306, 24172, 733.8599, 1.833944  
51307, 23744, 733.7979, 1.833789  
51308, 23410, 733.7360, 1.833634  
51309, 23202, 733.6741, 1.833479  
51310, 23294, 733.6122, 1.833325  
51311, 23756, 733.5502, 1.833170  
51312, 24348, 733.4883, 1.833015  
51313, 24672, 733.4264, 1.832860  
51314, 24532, 733.3644, 1.832706  
51315, 24068, 733.3025, 1.832551  
51316, 23580, 733.2406, 1.832396  
51317, 23186, 733.1787, 1.832241  
51318, 22804, 733.1167, 1.832086  
51319, 22414, 733.0548, 1.831932  
51320, 22194, 732.9929, 1.831777  
51321, 22416, 732.9310, 1.831622  
51322, 23048, 732.8690, 1.831467  
51323, 23682, 732.8071, 1.831313  
51324, 23858, 732.7452, 1.831158  
51325, 23534, 732.6833, 1.831003  
51326, 23152, 732.6213, 1.830848  
51327, 23208, 732.5594, 1.830694  
51328, 23768, 732.4975, 1.830539  
51329, 24416, 732.4355, 1.830384  
51330, 24690, 732.3736, 1.830229  
51331, 24496, 732.3117, 1.830075  
51332, 24106, 732.2498, 1.829920  
51333, 23798, 732.1878, 1.829765  
51334, 23604, 732.1259, 1.829610  
51335, 23402, 732.0640, 1.829456  
51336, 23192, 732.0021, 1.829301  
51337, 23130, 731.9401, 1.829146  
51338, 23320, 731.8782, 1.828991  
51339, 23610, 731.8163, 1.828837  
51340, 23708, 731.7543, 1.828682  
51341, 23528, 731.6924, 1.828527  
51342, 23334, 731.6305, 1.828372  
51343, 23438, 731.5686, 1.828218  
51344, 23810, 731.5066, 1.828063  
51345, 24060, 731.4447, 1.827908  
51346, 23810, 731.3828, 1.827753  
51347, 23134, 731.3209, 1.827599  
51348, 22452, 731.2589, 1.827444  
51349, 22096, 731.1970, 1.827289  
51350, 21942, 731.1351, 1.827134  
51351, 21562, 731.0732, 1.826979  
51352, 20772, 731.0112, 1.826825  
51353, 19860, 730.9493, 1.826670  
51354, 19320, 730.8874, 1.826515  
51355, 19416, 730.8254, 1.826360  
51356, 19896, 730.7635, 1.826206  
51357, 20434, 730.7016, 1.826051  
51358, 20980, 730.6397, 1.825896  
51359, 21736, 730.5777, 1.825741  
51360, 22802, 730.5158, 1.825587  
51361, 23850, 730.4539, 1.825432  
51362, 24372, 730.3920, 1.825277  
51363, 24198, 730.3300, 1.825122  
51364, 23710, 730.2681, 1.824968  
51365, 23494, 730.2062, 1.824813  
51366, 23768, 730.1442, 1.824658  
51367, 24186, 730.0823, 1.824503  
51368, 24198, 730.0204, 1.824349  
51369, 23596, 729.9585, 1.824194  
51370, 22656, 729.8965, 1.824039  
51371, 21816, 729.8346, 1.823884  
51372, 21244, 729.7727, 1.823730  
51373, 20840, 729.7108, 1.823575  
51374, 20506, 729.6488, 1.823420  
51375, 20346, 729.5869, 1.823265  
51376, 20602, 729.5250, 1.823111  
51377, 21348, 729.4631, 1.822956  
51378, 22390, 729.4011, 1.822801  
51379, 23430, 729.3392, 1.822646  
51380, 24284, 729.2773, 1.822492  
51381, 24912, 729.2153, 1.822337  
51382, 25264, 729.1534, 1.822182  
51383, 25212, 729.0915, 1.822027  
51384, 24710, 729.0296, 1.821872  
51385, 23950, 728.9676, 1.821718  
51386, 23316, 728.9057, 1.821563  
51387, 23086, 728.8438, 1.821408  
51388, 23206, 728.7819, 1.821253  
51389, 23398, 728.7199, 1.821099  
51390, 23428, 728.6580, 1.820944  
51391, 23294, 728.5961, 1.820789  
51392, 23112, 728.5342, 1.820634  
51393, 22910, 728.4722, 1.820480  
51394, 22582, 728.4103, 1.820325  
51395, 22072, 728.3484, 1.820170  
51396, 21512, 728.2864, 1.820015  
51397, 21128, 728.2245, 1.819861  
51398, 21000, 728.1626, 1.819706  
51399, 21010, 728.1007, 1.819551  
51400, 21034, 728.0387, 1.819396  
51401, 21160, 727.9768, 1.819242  
51402, 21592, 727.9149, 1.819087  
51403, 22364, 727.8530, 1.818932  
51404, 23154, 727.7910, 1.818777  
51405, 23548, 727.7291, 1.818623  
51406, 23504, 727.6672, 1.818468  
51407, 23456, 727.6052, 1.818313  
51408, 23918, 727.5433, 1.818158  
51409, 24938, 727.4814, 1.818004  
51410, 25974, 727.4195, 1.817849  
51411, 26380, 727.3575, 1.817694  
51412, 26004, 727.2956, 1.817539  
51413, 25306, 727.2337, 1.817385  
51414, 24860, 727.1718, 1.817230  
51415, 24824, 727.1098, 1.817075  
51416, 24892, 727.0479, 1.816920  
51417, 24708, 726.9860, 1.816765  
51418, 24278, 726.9241, 1.816611  
51419, 23908, 726.8621, 1.816456  
51420, 23816, 726.8002, 1.816301  
51421, 23892, 726.7383, 1.816146  
51422, 23878, 726.6763, 1.815992  
51423, 23680, 726.6144, 1.815837  
51424, 23450, 726.5525, 1.815682  
51425, 23346, 726.4906, 1.815527  
51426, 23280, 726.4286, 1.815373  
51427, 23028, 726.3667, 1.815218  
51428, 22542, 726.3048, 1.815063  
51429, 22114, 726.2429, 1.814908  
51430, 22152, 726.1809, 1.814754  
51431, 22762, 726.1190, 1.814599  
51432, 23656, 726.0571, 1.814444  
51433, 24382, 725.9951, 1.814289  
51434, 24748, 725.9332, 1.814135  
51435, 24866, 725.8713, 1.813980  
51436, 24966, 725.8094, 1.813825  
51437, 25128, 725.7474, 1.813670  
51438, 25302, 725.6855, 1.813516  
51439, 25474, 725.6236, 1.813361  
51440, 25702, 725.5617, 1.813206  
51441, 25960, 725.4997, 1.813051  
51442, 26024, 725.4378, 1.812897  
51443, 25602, 725.3759, 1.812742  
51444, 24644, 725.3140, 1.812587  
51445, 23486, 725.2520, 1.812432  
51446, 22568, 725.1901, 1.812278  
51447, 22076, 725.1282, 1.812123  
51448, 21820, 725.0662, 1.811968  
51449, 21508, 725.0043, 1.811813  
51450, 21092, 724.9424, 1.811658  
51451, 20818, 724.8805, 1.811504  
51452, 20878, 724.8185, 1.811349  
51453, 21180, 724.7566, 1.811194  
51454, 21432, 724.6947, 1.811039  
51455, 21490, 724.6328, 1.810885  
51456, 21532, 724.5708, 1.810730  
51457, 21828, 724.5089, 1.810575  
51458, 22388, 724.4470, 1.810420  
51459, 22922, 724.3850, 1.810266  
51460, 23124, 724.3231, 1.810111  
51461, 22982, 724.2612, 1.809956  
51462, 22746, 724.1993, 1.809801  
51463, 22598, 724.1373, 1.809647  
51464, 22470, 724.0754, 1.809492  
51465, 22220, 724.0135, 1.809337  
51466, 21978, 723.9516, 1.809182  
51467, 22134, 723.8896, 1.809028  
51468, 22938, 723.8277, 1.808873  
51469, 24060, 723.7658, 1.808718  
51470, 24726, 723.7039, 1.808563  
51471, 24330, 723.6419, 1.808409  
51472, 23004, 723.5800, 1.808254  
51473, 21562, 723.5181, 1.808099  
51474, 20836, 723.4561, 1.807944  
51475, 21048, 723.3942, 1.807790  
51476, 21774, 723.3323, 1.807635  
51477, 22430, 723.2704, 1.807480  
51478, 22768, 723.2084, 1.807325  
51479, 22934, 723.1465, 1.807171  
51480, 23180, 723.0846, 1.807016  
51481, 23590, 723.0227, 1.806861  
51482, 24066, 722.9607, 1.806706  
51483, 24508, 722.8988, 1.806551  
51484, 24868, 722.8369, 1.806397  
51485, 25110, 722.7749, 1.806242  
51486, 25156, 722.7130, 1.806087

51487, 24994, 722.6511, 1.805932  
51488, 24766, 722.5892, 1.805778  
51489, 24692, 722.5272, 1.805623  
51490, 24826, 722.4653, 1.805468  
51491, 24928, 722.4034, 1.805313  
51492, 24686, 722.3415, 1.805159  
51493, 24014, 722.2795, 1.805004  
51494, 23214, 722.2176, 1.804849  
51495, 22670, 722.1557, 1.804694  
51496, 22490, 722.0938, 1.804540  
51497, 22396, 722.0318, 1.804385  
51498, 22020, 721.9699, 1.804230  
51499, 21298, 721.9080, 1.804075  
51500, 20550, 721.8460, 1.803921  
51501, 20182, 721.7841, 1.803766  
51502, 20344, 721.7222, 1.803611  
51503, 20852, 721.6603, 1.803456  
51504, 21416, 721.5983, 1.803302  
51505, 21880, 721.5364, 1.803147  
51506, 22250, 721.4745, 1.802992  
51507, 22550, 721.4126, 1.802837  
51508, 22770, 721.3506, 1.802683  
51509, 22874, 721.2887, 1.802528  
51510, 22938, 721.2268, 1.802373  
51511, 23054, 721.1648, 1.802218  
51512, 23232, 721.1029, 1.802064  
51513, 23340, 721.0410, 1.801909  
51514, 23244, 720.9791, 1.801754  
51515, 22962, 720.9171, 1.801599  
51516, 22648, 720.8552, 1.801444  
51517, 22458, 720.7933, 1.801290  
51518, 22402, 720.7314, 1.801135  
51519, 22404, 720.6694, 1.800980  
51520, 22470, 720.6075, 1.800825  
51521, 22714, 720.5456, 1.800671  
51522, 23218, 720.4837, 1.800516  
51523, 23838, 720.4217, 1.800361  
51524, 24232, 720.3598, 1.800206  
51525, 24134, 720.2979, 1.800052  
51526, 23562, 720.2359, 1.799897  
51527, 22824, 720.1740, 1.799742  
51528, 22248, 720.1121, 1.799587  
51529, 21974, 720.0502, 1.799433  
51530, 21950, 719.9882, 1.799278  
51531, 22086, 719.9263, 1.799123  
51532, 22346, 719.8644, 1.798968  
51533, 22702, 719.8025, 1.798814  
51534, 23064, 719.7405, 1.798659  
51535, 23328, 719.6786, 1.798504  
51536, 23454, 719.6167, 1.798349  
51537, 23494, 719.5547, 1.798195  
51538, 23482, 719.4928, 1.798040  
51539, 23322, 719.4309, 1.797885  
51540, 22878, 719.3690, 1.797730  
51541, 22170, 719.3070, 1.797576  
51542, 21420, 719.2451, 1.797421  
51543, 20904, 719.1832, 1.797266  
51544, 20690, 719.1213, 1.797111  
51545, 20596, 719.0593, 1.796957  
51546, 20432, 718.9974, 1.796802  
51547, 20226, 718.9355, 1.796647  
51548, 20218, 718.8736, 1.796492  
51549, 20590, 718.8116, 1.796337  
51550, 21272, 718.7497, 1.796183  
51551, 22028, 718.6878, 1.796028  
51552, 22770, 718.6258, 1.795873  
51553, 23656, 718.5639, 1.795718  
51554, 24830, 718.5020, 1.795564  
51555, 26140, 718.4401, 1.795409  
51556, 27116, 718.3781, 1.795254  
51557, 27370, 718.3162, 1.795099  
51558, 26984, 718.2543, 1.794945  
51559, 26392, 718.1924, 1.794790  
51560, 26000, 718.1304, 1.794635  
51561, 25800, 718.0685, 1.794480  
51562, 25514, 718.0066, 1.794326  
51563, 25004, 717.9446, 1.794171  
51564, 24478, 717.8827, 1.794016  
51565, 24238, 717.8208, 1.793861  
51566, 24264, 717.7589, 1.793707  
51567, 24166, 717.6969, 1.793552  
51568, 23564, 717.6350, 1.793397  
51569, 22542, 717.5731, 1.793242  
51570, 21602, 717.5112, 1.793088  
51571, 21176, 717.4492, 1.792933  
51572, 21224, 717.3873, 1.792778  
51573, 21328, 717.3254, 1.792623  
51574, 21186, 717.2635, 1.792469  
51575, 20940, 717.2015, 1.792314  
51576, 20934, 717.1396, 1.792159  
51577, 21284, 717.0777, 1.792004  
51578, 21688, 717.0157, 1.791850  
51579, 21720, 716.9538, 1.791695  
51580, 21314, 716.8919, 1.791540  
51581, 20824, 716.8300, 1.791385  
51582, 20616, 716.7680, 1.791230  
51583, 20714, 716.7061, 1.791076  
51584, 20794, 716.6442, 1.790921  
51585, 20612, 716.5823, 1.790766  
51586, 20270, 716.5203, 1.790611  
51587, 20098, 716.4584, 1.790457  
51588, 20246, 716.3965, 1.790302  
51589, 20520, 716.3346, 1.790147  
51590, 20600, 716.2726, 1.789992  
51591, 20416, 716.2107, 1.789838  
51592, 20204, 716.1488, 1.789683  
51593, 20254, 716.0868, 1.789528  
51594, 20576, 716.0249, 1.789373  
51595, 20938, 715.9630, 1.789219  
51596, 21092, 715.9011, 1.789064  
51597, 21024, 715.8391, 1.788909  
51598, 20888, 715.7772, 1.788754  
51599, 20804, 715.7153, 1.788600  
51600, 20736, 715.6534, 1.788445  
51601, 20640, 715.5914, 1.788290  
51602, 20586, 715.5295, 1.788135  
51603, 20714, 715.4676, 1.787981  
51604, 21060, 715.4056, 1.787826  
51605, 21458, 715.3437, 1.787671  
51606, 21748, 715.2818, 1.787516  
51607, 21902, 715.2199, 1.787362  
51608, 22108, 715.1579, 1.787207  
51609, 22484, 715.0960, 1.787052  
51610, 22934, 715.0341, 1.786897  
51611, 23222, 714.9722, 1.786742  
51612, 23224, 714.9102, 1.786588  
51613, 23058, 714.8483, 1.786433  
51614, 22924, 714.7864, 1.786278  
51615, 22866, 714.7245, 1.786123  
51616, 22712, 714.6625, 1.785969  
51617, 22284, 714.6006, 1.785814  
51618, 21602, 714.5387, 1.785659  
51619, 20886, 714.4767, 1.785504  
51620, 20310, 714.4148, 1.785350  
51621, 19852, 714.3529, 1.785195  
51622, 19432, 714.2910, 1.785040  
51623, 19098, 714.2290, 1.784885  
51624, 19030, 714.1671, 1.784731  
51625, 19338, 714.1052, 1.784576  
51626, 19832, 714.0433, 1.784421  
51627, 20142, 713.9813, 1.784266  
51628, 20066, 713.9194, 1.784112  
51629, 19798, 713.8575, 1.783957  
51630, 19758, 713.7955, 1.783802  
51631, 20192, 713.7336, 1.783647  
51632, 20912, 713.6717, 1.783493  
51633, 21514, 713.6098, 1.783338  
51634, 21746, 713.5478, 1.783183  
51635, 21702, 713.4859, 1.783028  
51636, 21652, 713.4240, 1.782874  
51637, 21738, 713.3621, 1.782719  
51638, 21904, 713.3001, 1.782564  
51639, 22042, 713.2382, 1.782409  
51640, 22206, 713.1763, 1.782255  
51641, 22548, 713.1144, 1.782100  
51642, 23118, 713.0524, 1.781945  
51643, 23740, 712.9905, 1.781790  
51644, 24150, 712.9286, 1.781635  
51645, 24218, 712.8666, 1.781481  
51646, 24060, 712.8047, 1.781326  
51647, 23916, 712.7428, 1.781171  
51648, 23966, 712.6809, 1.781016  
51649, 24256, 712.6189, 1.780862  
51650, 24710, 712.5570, 1.780707  
51651, 25186, 712.4951, 1.780552  
51652, 25474, 712.4332, 1.780397  
51653, 25348, 712.3712, 1.780243  
51654, 24748, 712.3093, 1.780088  
51655, 23896, 712.2474, 1.779933  
51656, 23236, 712.1854, 1.779778  
51657, 23096, 712.1235, 1.779624  
51658, 23430, 712.0616, 1.779469  
51659, 23858, 711.9997, 1.779314  
51660, 24040, 711.9377, 1.779159  
51661, 23998, 711.8758, 1.779005  
51662, 24044, 711.8139, 1.778850  
51663, 24418, 711.7520, 1.778695  
51664, 25020, 711.6900, 1.778540  
51665, 25504, 711.6281, 1.778386  
51666, 25600, 711.5662, 1.778231  
51667, 25366, 711.5043, 1.778076  
51668, 25024, 711.4423, 1.777921  
51669, 24718, 711.3804, 1.777767  
51670, 24392, 711.3185, 1.777612  
51671, 24002, 711.2565, 1.777457  
51672, 23646, 711.1946, 1.777302  
51673, 23530, 711.1327, 1.777148  
51674, 23716, 711.0708, 1.776993  
51675, 23992, 711.0088, 1.776838  
51676, 24092, 710.9469, 1.776683  
51677, 23944, 710.8850, 1.776528  
51678, 23770, 710.8231, 1.776374  
51679, 23848, 710.7611, 1.776219  
51680, 24214, 710.6992, 1.776064  
51681, 24676, 710.6373, 1.775909  
51682, 25032, 710.5753, 1.775755  
51683, 25244, 710.5134, 1.775600  
51684, 25364, 710.4515, 1.775445  
51685, 25338, 710.3896, 1.775290  
51686, 24996, 710.3276, 1.775136  
51687, 24308, 710.2657, 1.774981  
51688, 23546, 710.2038, 1.774826  
51689, 23134, 710.1419, 1.774671  
51690, 23242, 710.0799, 1.774517  
51691, 23538, 710.0180, 1.774362  
51692, 23510, 709.9561, 1.774207  
51693, 22952, 709.8942, 1.774052  
51694, 22276, 709.8322, 1.773898  
51695, 22130, 709.7703, 1.773743  
51696, 22812, 709.7084, 1.773588  
51697, 23968, 709.6464, 1.773433  
51698, 24918, 709.5845, 1.773279  
51699, 25256, 709.5226, 1.773124  
51700, 25132, 709.4607, 1.772969  
51701, 24992, 709.3987, 1.772814  
51702, 25114, 709.3368, 1.772660  
51703, 25424, 709.2749, 1.772505  
51704, 25658, 709.2130, 1.772350  
51705, 25666, 709.1510, 1.772195  
51706, 25466, 709.0891, 1.772041  
51707, 25160, 709.0272, 1.771886  
51708, 24810, 708.9652, 1.771731  
51709, 24482, 708.9033, 1.771576  
51710, 24338, 708.8414, 1.771421  
51711, 24522, 708.7795, 1.771267  
51712, 24988, 708.7175, 1.771112  
51713, 25468, 708.6556, 1.770957  
51714, 25670, 708.5937, 1.770802



51715, 25542, 708.5318, 1.770648  
51716, 25324, 708.4698, 1.770493  
51717, 25268, 708.4079, 1.770338  
51718, 25362, 708.3460, 1.770183  
51719, 25374, 708.2841, 1.770029  
51720, 25134, 708.2221, 1.769874  
51721, 24752, 708.1602, 1.769719  
51722, 24506, 708.0983, 1.769564  
51723, 24572, 708.0363, 1.769410  
51724, 24838, 707.9744, 1.769255  
51725, 25080, 707.9125, 1.769100  
51726, 25220, 707.8506, 1.768945  
51727, 25420, 707.7886, 1.768791  
51728, 25822, 707.7267, 1.768636  
51729, 26364, 707.6648, 1.768481  
51730, 26788, 707.6029, 1.768326  
51731, 26902, 707.5409, 1.768172  
51732, 26740, 707.4790, 1.768017  
51733, 26502, 707.4171, 1.767862  
51734, 26286, 707.3551, 1.767707  
51735, 26038, 707.2932, 1.767553  
51736, 25690, 707.2313, 1.767398  
51737, 25304, 707.1694, 1.767243  
51738, 25038, 707.1074, 1.767088  
51739, 24916, 707.0455, 1.766934  
51740, 24730, 706.9836, 1.766779  
51741, 24214, 706.9217, 1.766624  
51742, 23322, 706.8597, 1.766469  
51743, 22304, 706.7978, 1.766314  
51744, 21494, 706.7359, 1.766160  
51745, 21042, 706.6740, 1.766005  
51746, 20904, 706.6120, 1.765850  
51747, 21022, 706.5501, 1.765695  
51748, 21452, 706.4882, 1.765541  
51749, 22262, 706.4262, 1.765386  
51750, 23278, 706.3643, 1.765231  
51751, 24110, 706.3024, 1.765076  
51752, 24410, 706.2405, 1.764922  
51753, 24208, 706.1785, 1.764767  
51754, 23882, 706.1166, 1.764612  
51755, 23830, 706.0547, 1.764457  
51756, 24096, 705.9928, 1.764303  
51757, 24416, 705.9308, 1.764148  
51758, 24500, 705.8689, 1.763993  
51759, 24340, 705.8070, 1.763838  
51760, 24128, 705.7450, 1.763684  
51761, 24032, 705.6831, 1.763529  
51762, 24004, 705.6212, 1.763374  
51763, 23898, 705.5593, 1.763219  
51764, 23654, 705.4973, 1.763065  
51765, 23324, 705.4354, 1.762910  
51766, 22956, 705.3735, 1.762755  
51767, 22532, 705.3116, 1.762600  
51768, 22052, 705.2496, 1.762446  
51769, 21672, 705.1877, 1.762291  
51770, 21650, 705.1258, 1.762136  
51771, 22088, 705.0639, 1.761981  
51772, 22740, 705.0019, 1.761827  
51773, 23178, 704.9400, 1.761672  
51774, 23208, 704.8781, 1.761517  
51775, 23052, 704.8161, 1.761362  
51776, 23130, 704.7542, 1.761207  
51777, 23614, 704.6923, 1.761053  
51778, 24240, 704.6304, 1.760898  
51779, 24568, 704.5684, 1.760743  
51780, 24424, 704.5065, 1.760588  
51781, 24082, 704.4446, 1.760434  
51782, 23926, 704.3827, 1.760279  
51783, 24074, 704.3207, 1.760124  
51784, 24276, 704.2588, 1.759969  
51785, 24192, 704.1969, 1.759815  
51786, 23720, 704.1349, 1.759660  
51787, 23070, 704.0730, 1.759505  
51788, 22510, 704.0111, 1.759350  
51789, 22180, 703.9492, 1.759196  
51790, 22094, 703.8872, 1.759041

51791, 22276, 703.8253, 1.758886  
51792, 22762, 703.7634, 1.758731  
51793, 23498, 703.7015, 1.758577  
51794, 24224, 703.6395, 1.758422  
51795, 24662, 703.5776, 1.758267  
51796, 24702, 703.5157, 1.758112  
51797, 24504, 703.4538, 1.757958  
51798, 24272, 703.3918, 1.757803  
51799, 24044, 703.3299, 1.757648  
51800, 23668, 703.2680, 1.757493  
51801, 23062, 703.2060, 1.757339  
51802, 22388, 703.1441, 1.757184  
51803, 21946, 703.0822, 1.757029  
51804, 21910, 703.0203, 1.756874  
51805, 22168, 702.9583, 1.756720  
51806, 22486, 702.8964, 1.756565  
51807, 22778, 702.8345, 1.756410  
51808, 23130, 702.7726, 1.756255  
51809, 23582, 702.7106, 1.756100  
51810, 23946, 702.6487, 1.755946  
51811, 23902, 702.5868, 1.755791  
51812, 23358, 702.5249, 1.755636  
51813, 22646, 702.4629, 1.755481  
51814, 22290, 702.4010, 1.755327  
51815, 22612, 702.3391, 1.755172  
51816, 23480, 702.2771, 1.755017  
51817, 24492, 702.2152, 1.754862  
51818, 25310, 702.1533, 1.754708  
51819, 25794, 702.0914, 1.754553  
51820, 25906, 702.0294, 1.754398  
51821, 25564, 701.9675, 1.754243  
51822, 24718, 701.9056, 1.754089  
51823, 23542, 701.8437, 1.753934  
51824, 22472, 701.7817, 1.753779  
51825, 21924, 701.7198, 1.753624  
51826, 21974, 701.6579, 1.753470  
51827, 22298, 701.5959, 1.753315  
51828, 22498, 701.5340, 1.753160  
51829, 22468, 701.4721, 1.753005  
51830, 22424, 701.4102, 1.752851  
51831, 22664, 701.3482, 1.752696  
51832, 23246, 701.2863, 1.752541  
51833, 24028, 701.2244, 1.752386  
51834, 24848, 701.1625, 1.752232  
51835, 25676, 701.1005, 1.752077  
51836, 26508, 701.0386, 1.751922  
51837, 27246, 700.9767, 1.751767  
51838, 27676, 700.9148, 1.751613  
51839, 27656, 700.8528, 1.751458  
51840, 27246, 700.7909, 1.751303  
51841, 26634, 700.7290, 1.751148  
51842, 25964, 700.6670, 1.750993  
51843, 25286, 700.6051, 1.750839  
51844, 24666, 700.5432, 1.750684  
51845, 24266, 700.4813, 1.750529  
51846, 24196, 700.4193, 1.750374  
51847, 24334, 700.3574, 1.750220  
51848, 24338, 700.2955, 1.750065  
51849, 23950, 700.2336, 1.749910  
51850, 23314, 700.1716, 1.749755  
51851, 22886, 700.1097, 1.749601  
51852, 23020, 700.0478, 1.749446  
51853, 23566, 699.9858, 1.749291  
51854, 23994, 699.9239, 1.749136  
51855, 23898, 699.8620, 1.748982  
51856, 23396, 699.8001, 1.748827  
51857, 22986, 699.7381, 1.748672  
51858, 22996, 699.6762, 1.748517  
51859, 23260, 699.6143, 1.748363  
51860, 23342, 699.5524, 1.748208  
51861, 23042, 699.4904, 1.748053  
51862, 22638, 699.4285, 1.747898  
51863, 22588, 699.3666, 1.747744  
51864, 23036, 699.3047, 1.747589  
51865, 23666, 699.2427, 1.747434  
51866, 24042, 699.1808, 1.747279

51867, 24026, 699.1189, 1.747125  
51868, 23820, 699.0569, 1.746970  
51869, 23638, 698.9950, 1.746815  
51870, 23446, 698.9331, 1.746660  
51871, 23014, 698.8712, 1.746506  
51872, 22282, 698.8092, 1.746351  
51873, 21462, 698.7473, 1.746196  
51874, 20858, 698.6854, 1.746041  
51875, 20556, 698.6235, 1.745886  
51876, 20428, 698.5615, 1.745732  
51877, 20374, 698.4996, 1.745577  
51878, 20502, 698.4377, 1.745422  
51879, 21034, 698.3757, 1.745267  
51880, 21964, 698.3138, 1.745113  
51881, 22992, 698.2519, 1.744958  
51882, 23772, 698.1900, 1.744803  
51883, 24260, 698.1280, 1.744648  
51884, 24706, 698.0661, 1.744494  
51885, 25302, 698.0042, 1.744339  
51886, 25854, 697.9423, 1.744184  
51887, 25922, 697.8803, 1.744029  
51888, 25252, 697.8184, 1.743875  
51889, 24110, 697.7565, 1.743720  
51890, 23090, 697.6946, 1.743565  
51891, 22638, 697.6326, 1.743410  
51892, 22740, 697.5707, 1.743256  
51893, 23046, 697.5088, 1.743101  
51894, 23262, 697.4468, 1.742946  
51895, 23358, 697.3849, 1.742791  
51896, 23448, 697.3230, 1.742637  
51897, 23596, 697.2611, 1.742482  
51898, 23756, 697.1991, 1.742327  
51899, 23932, 697.1372, 1.742172  
51900, 24212, 697.0753, 1.742018  
51901, 24644, 697.0134, 1.741863  
51902, 25060, 696.9514, 1.741708  
51903, 25142, 696.8895, 1.741553  
51904, 24730, 696.8276, 1.741398  
51905, 23982, 696.7656, 1.741244  
51906, 23292, 696.7037, 1.741089  
51907, 22908, 696.6418, 1.740934  
51908, 22746, 696.5799, 1.740779  
51909, 22550, 696.5179, 1.740625  
51910, 22236, 696.4560, 1.740470  
51911, 21992, 696.3941, 1.740315  
51912, 22080, 696.3322, 1.740160  
51913, 22536, 696.2702, 1.740006  
51914, 23110, 696.2083, 1.739851  
51915, 23508, 696.1464, 1.739696  
51916, 23610, 696.0845, 1.739541  
51917, 23502, 696.0225, 1.739387  
51918, 23310, 695.9606, 1.739232  
51919, 23108, 695.8987, 1.739077  
51920, 22994, 695.8367, 1.738922  
51921, 23144, 695.7748, 1.738768  
51922, 23718, 695.7129, 1.738613  
51923, 24592, 695.6510, 1.738458  
51924, 25368, 695.5890, 1.738303  
51925, 25604, 695.5271, 1.738149  
51926, 25216, 695.4652, 1.737994  
51927, 24518, 695.4033, 1.737839  
51928, 23948, 695.3413, 1.737684  
51929, 23658, 695.2794, 1.737530  
51930, 23442, 695.2175, 1.737375  
51931, 23062, 695.1555, 1.737220  
51932, 22554, 695.0936, 1.737065  
51933, 22236, 695.0317, 1.736911  
51934, 22418, 694.9698, 1.736756  
51935, 23096, 694.9078, 1.736601  
51936, 24024, 694.8459, 1.736446  
51937, 24932, 694.7840, 1.736291  
51938, 25690, 694.7221, 1.736137  
51939, 26270, 694.6601, 1.735982  
51940, 26590, 694.5982, 1.735827  
51941, 26566, 694.5363, 1.735672  
51942, 26240, 694.4744, 1.735518

51943, 25802, 694.4124, 1.735363  
51944, 25454, 694.3505, 1.735208  
51945, 25172, 694.2886, 1.735053  
51946, 24772, 694.2266, 1.734899  
51947, 24164, 694.1647, 1.734744  
51948, 23566, 694.1028, 1.734589  
51949, 23336, 694.0409, 1.734434  
51950, 23614, 693.9789, 1.734280  
51951, 24118, 693.9170, 1.734125  
51952, 24354, 693.8551, 1.733970  
51953, 24072, 693.7932, 1.733815  
51954, 23452, 693.7312, 1.733661  
51955, 22874, 693.6693, 1.733506  
51956, 22558, 693.6074, 1.733351  
51957, 22396, 693.5454, 1.733196  
51958, 22218, 693.4835, 1.733042  
51959, 22032, 693.4216, 1.732887  
51960, 22020, 693.3597, 1.732732  
51961, 22270, 693.2977, 1.732577  
51962, 22590, 693.2358, 1.732423  
51963, 22712, 693.1739, 1.732268  
51964, 22572, 693.1120, 1.732113  
51965, 22410, 693.0500, 1.731958  
51966, 22470, 692.9881, 1.731804  
51967, 22732, 692.9262, 1.731649  
51968, 22934, 692.8643, 1.731494  
51969, 22914, 692.8023, 1.731339  
51970, 22860, 692.7404, 1.731184  
51971, 23118, 692.6785, 1.731030  
51972, 23788, 692.6165, 1.730875  
51973, 24546, 692.5546, 1.730720  
51974, 24870, 692.4927, 1.730565  
51975, 24534, 692.4308, 1.730411  
51976, 23796, 692.3688, 1.730256  
51977, 23130, 692.3069, 1.730101  
51978, 22848, 692.2450, 1.729946  
51979, 22968, 692.1831, 1.729792  
51980, 23366, 692.1211, 1.729637  
51981, 23970, 692.0592, 1.729482  
51982, 24742, 691.9973, 1.729327  
51983, 25484, 691.9353, 1.729173  
51984, 25890, 691.8734, 1.729018  
51985, 25810, 691.8115, 1.728863  
51986, 25510, 691.7496, 1.728708  
51987, 25522, 691.6876, 1.728554  
51988, 26178, 691.6257, 1.728399  
51989, 27278, 691.5638, 1.728244  
51990, 28226, 691.5019, 1.728089  
51991, 28546, 691.4399, 1.727935  
51992, 28244, 691.3780, 1.727780  
51993, 27670, 691.3161, 1.727625  
51994, 27106, 691.2542, 1.727470  
51995, 26482, 691.1922, 1.727316  
51996, 25566, 691.1303, 1.727161  
51997, 24330, 691.0684, 1.727006  
51998, 23096, 691.0064, 1.726851  
51999, 22268, 690.9445, 1.726697  
52000, 22016, 690.8826, 1.726542  
52001, 22168, 690.8207, 1.726387  
52002, 22446, 690.7587, 1.726232  
52003, 22710, 690.6968, 1.726077  
52004, 22990, 690.6349, 1.725923  
52005, 23336, 690.5730, 1.725768  
52006, 23684, 690.5110, 1.725613  
52007, 23932, 690.4491, 1.725458  
52008, 24068, 690.3872, 1.725304  
52009, 24182, 690.3252, 1.725149  
52010, 24346, 690.2633, 1.724994  
52011, 24502, 690.2014, 1.724839  
52012, 24520, 690.1395, 1.724685  
52013, 24370, 690.0775, 1.724530  
52014, 24124, 690.0156, 1.724375  
52015, 23896, 689.9537, 1.724220  
52016, 23722, 689.8918, 1.724066  
52017, 23564, 689.8298, 1.723911  
52018, 23422, 689.7679, 1.723756  
52019, 23400, 689.7060, 1.723601  
52020, 23598, 689.6441, 1.723447  
52021, 23968, 689.5821, 1.723292  
52022, 24332, 689.5202, 1.723137  
52023, 24506, 689.4583, 1.722982  
52024, 24472, 689.3963, 1.722828  
52025, 24322, 689.3344, 1.722673  
52026, 24126, 689.2725, 1.722518  
52027, 23880, 689.2106, 1.722363  
52028, 23568, 689.1486, 1.722209  
52029, 23296, 689.0867, 1.722054  
52030, 23250, 689.0248, 1.721899  
52031, 23506, 688.9629, 1.721744  
52032, 23882, 688.9009, 1.721590  
52033, 24052, 688.8390, 1.721435  
52034, 23774, 688.7771, 1.721280  
52035, 23106, 688.7152, 1.721125  
52036, 22326, 688.6532, 1.720970  
52037, 21730, 688.5913, 1.720816  
52038, 21416, 688.5294, 1.720661  
52039, 21350, 688.4674, 1.720506  
52040, 21408, 688.4055, 1.720351  
52041, 21496, 688.3436, 1.720197  
52042, 21526, 688.2817, 1.720042  
52043, 21474, 688.2197, 1.719887  
52044, 21432, 688.1578, 1.719732  
52045, 21592, 688.0959, 1.719578  
52046, 22086, 688.0340, 1.719423  
52047, 22780, 687.9720, 1.719268  
52048, 23322, 687.9101, 1.719113  
52049, 23420, 687.8482, 1.718959  
52050, 23144, 687.7862, 1.718804  
52051, 22872, 687.7243, 1.718649  
52052, 22910, 687.6624, 1.718494  
52053, 23162, 687.6005, 1.718340  
52054, 23210, 687.5385, 1.718185  
52055, 22790, 687.4766, 1.718030  
52056, 22134, 687.4147, 1.717875  
52057, 21786, 687.3528, 1.717721  
52058, 22048, 687.2908, 1.717566  
52059, 22618, 687.2289, 1.717411  
52060, 22860, 687.1670, 1.717256  
52061, 22418, 687.1051, 1.717102  
52062, 21598, 687.0431, 1.716947  
52063, 21058, 686.9812, 1.716792  
52064, 21220, 686.9193, 1.716637  
52065, 21894, 686.8573, 1.716483  
52066, 22558, 686.7954, 1.716328  
52067, 22866, 686.7335, 1.716173  
52068, 22904, 686.6716, 1.716018  
52069, 22922, 686.6096, 1.715863  
52070, 22978, 686.5477, 1.715709  
52071, 22872, 686.4858, 1.715554  
52072, 22466, 686.4239, 1.715399  
52073, 21958, 686.3619, 1.715244  
52074, 21756, 686.3000, 1.715090  
52075, 22104, 686.2381, 1.714935  
52076, 22812, 686.1761, 1.714780  
52077, 23420, 686.1142, 1.714625  
52078, 23600, 686.0523, 1.714471  
52079, 23388, 685.9904, 1.714316  
52080, 23096, 685.9284, 1.714161  
52081, 22962, 685.8665, 1.714006  
52082, 23036, 685.8046, 1.713852  
52083, 23210, 685.7427, 1.713697  
52084, 23430, 685.6807, 1.713542  
52085, 23726, 685.6188, 1.713387  
52086, 24162, 685.5569, 1.713233  
52087, 24744, 685.4950, 1.713078  
52088, 25426, 685.4330, 1.712923  
52089, 26104, 685.3711, 1.712768  
52090, 26608, 685.3092, 1.712614  
52091, 26702, 685.2472, 1.712459  
52092, 26234, 685.1853, 1.712304  
52093, 25300, 685.1234, 1.712149  
52094, 24310, 685.0615, 1.711995  
52095, 23760, 684.9995, 1.711840  
52096, 23898, 684.9376, 1.711685  
52097, 24528, 684.8757, 1.711530  
52098, 25194, 684.8138, 1.711376  
52099, 25526, 684.7518, 1.711221  
52100, 25470, 684.6899, 1.711066  
52101, 25206, 684.6280, 1.710911  
52102, 24916, 684.5660, 1.710756  
52103, 24656, 684.5041, 1.710602  
52104, 24394, 684.4422, 1.710447  
52105, 24096, 684.3803, 1.710292  
52106, 23750, 684.3183, 1.710137  
52107, 23336, 684.2564, 1.709983  
52108, 22868, 684.1945, 1.709828  
52109, 22476, 684.1326, 1.709673  
52110, 22394, 684.0706, 1.709518  
52111, 22750, 684.0087, 1.709364  
52112, 23360, 683.9468, 1.709209  
52113, 23768, 683.8849, 1.709054  
52114, 23636, 683.8229, 1.708899  
52115, 23084, 683.7610, 1.708745  
52116, 22648, 683.6991, 1.708590  
52117, 22790, 683.6371, 1.708435  
52118, 23456, 683.5752, 1.708280  
52119, 24118, 683.5133, 1.708126  
52120, 24264, 683.4514, 1.707971  
52121, 23860, 683.3894, 1.707816  
52122, 23296, 683.3275, 1.707661  
52123, 22982, 683.2656, 1.707507  
52124, 22984, 683.2037, 1.707352  
52125, 23090, 683.1417, 1.707197  
52126, 23114, 683.0798, 1.707042  
52127, 23052, 683.0179, 1.706888  
52128, 22942, 682.9559, 1.706733  
52129, 22642, 682.8940, 1.706578  
52130, 21988, 682.8321, 1.706423  
52131, 21084, 682.7702, 1.706269  
52132, 20418, 682.7082, 1.706114  
52133, 20446, 682.6463, 1.705959  
52134, 21132, 682.5844, 1.705804  
52135, 21832, 682.5225, 1.705649  
52136, 21872, 682.4605, 1.705495  
52137, 21162, 682.3986, 1.705340  
52138, 20310, 682.3367, 1.705185  
52139, 20042, 682.2748, 1.705030  
52140, 20510, 682.2128, 1.704876  
52141, 21264, 682.1509, 1.704721  
52142, 21764, 682.0890, 1.704566  
52143, 21944, 682.0270, 1.704411  
52144, 22156, 681.9651, 1.704257  
52145, 22652, 681.9032, 1.704102  
52146, 23192, 681.8413, 1.703947  
52147, 23242, 681.7793, 1.703792  
52148, 22562, 681.7174, 1.703638  
52149, 21504, 681.6555, 1.703483  
52150, 20692, 681.5936, 1.703328  
52151, 20498, 681.5316, 1.703173  
52152, 20798, 681.4697, 1.703019  
52153, 21254, 681.4078, 1.702864  
52154, 21674, 681.3458, 1.702709  
52155, 22088, 681.2839, 1.702554  
52156, 22498, 681.2220, 1.702400  
52157, 22696, 681.1601, 1.702245  
52158, 22476, 681.0981, 1.702090  
52159, 21912, 681.0362, 1.701935  
52160, 21414, 680.9743, 1.701781  
52161, 21368, 680.9124, 1.701626  
52162, 21758, 680.8504, 1.701471  
52163, 22188, 680.7885, 1.701316  
52164, 22280, 680.7266, 1.701162  
52165, 22050, 680.6647, 1.701007  
52166, 21840, 680.6027, 1.700852  
52167, 21906, 680.5408, 1.700697  
52168, 22160, 680.4789, 1.700542  
52169, 22266, 680.4169, 1.700388  
52170, 21998, 680.3550, 1.700233

52171, 21472, 680.2931, 1.700078  
52172, 20992, 680.2312, 1.699923  
52173, 20790, 680.1692, 1.699769  
52174, 20888, 680.1073, 1.699614  
52175, 21164, 680.0454, 1.699459  
52176, 21464, 679.9835, 1.699304  
52177, 21634, 679.9215, 1.699150  
52178, 21544, 679.8596, 1.698995  
52179, 21174, 679.7977, 1.698840  
52180, 20720, 679.7357, 1.698685  
52181, 20508, 679.6738, 1.698531  
52182, 20766, 679.6119, 1.698376  
52183, 21358, 679.5500, 1.698221  
52184, 21900, 679.4880, 1.698066  
52185, 22102, 679.4261, 1.697912  
52186, 22056, 679.3642, 1.697757  
52187, 22082, 679.3023, 1.697602  
52188, 22346, 679.2403, 1.697447  
52189, 22634, 679.1784, 1.697293  
52190, 22596, 679.1165, 1.697138  
52191, 22158, 679.0546, 1.696983  
52192, 21680, 678.9926, 1.696828  
52193, 21592, 678.9307, 1.696674  
52194, 21954, 678.8688, 1.696519  
52195, 22384, 678.8068, 1.696364  
52196, 22496, 678.7449, 1.696209  
52197, 22282, 678.6830, 1.696054  
52198, 22094, 678.6211, 1.695900  
52199, 22210, 678.5591, 1.695745  
52200, 22500, 678.4972, 1.695590  
52201, 22598, 678.4353, 1.695435  
52202, 22372, 678.3734, 1.695281  
52203, 22104, 678.3114, 1.695126  
52204, 22222, 678.2495, 1.694971  
52205, 22822, 678.1876, 1.694816  
52206, 23526, 678.1256, 1.694662  
52207, 23846, 678.0637, 1.694507  
52208, 23620, 678.0018, 1.694352  
52209, 23090, 677.9399, 1.694197  
52210, 22566, 677.8779, 1.694043  
52211, 22124, 677.8160, 1.693888  
52212, 21640, 677.7541, 1.693733  
52213, 21062, 677.6922, 1.693578  
52214, 20542, 677.6302, 1.693424  
52215, 20240, 677.5683, 1.693269  
52216, 20128, 677.5064, 1.693114  
52217, 20002, 677.4445, 1.692959  
52218, 19806, 677.3825, 1.692805  
52219, 19754, 677.3206, 1.692650  
52220, 20092, 677.2587, 1.692495  
52221, 20752, 677.1967, 1.692340  
52222, 21314, 677.1348, 1.692186  
52223, 21376, 677.0729, 1.692031  
52224, 20972, 677.0110, 1.691876  
52225, 20580, 676.9490, 1.691721  
52226, 20594, 676.8871, 1.691567  
52227, 20920, 676.8252, 1.691412  
52228, 21080, 676.7633, 1.691257  
52229, 20752, 676.7013, 1.691102  
52230, 20178, 676.6394, 1.690947  
52231, 19966, 676.5775, 1.690793  
52232, 20532, 676.5156, 1.690638  
52233, 21728, 676.4536, 1.690483  
52234, 22998, 676.3917, 1.690328  
52235, 23892, 676.3298, 1.690174  
52236, 24356, 676.2678, 1.690019  
52237, 24598, 676.2059, 1.689864  
52238, 24770, 676.1440, 1.689709  
52239, 24848, 676.0821, 1.689555  
52240, 24740, 676.0201, 1.689400  
52241, 24430, 675.9582, 1.689245  
52242, 23962, 675.8963, 1.689090  
52243, 23330, 675.8344, 1.688936  
52244, 22528, 675.7724, 1.688781  
52245, 21682, 675.7105, 1.688626  
52246, 21116, 675.6486, 1.688471  
52247, 21106, 675.5866, 1.688317  
52248, 21572, 675.5247, 1.688162  
52249, 22066, 675.4628, 1.688007  
52250, 22134, 675.4009, 1.687852  
52251, 21744, 675.3389, 1.687698  
52252, 21276, 675.2770, 1.687543  
52253, 21152, 675.2151, 1.687388  
52254, 21410, 675.1532, 1.687233  
52255, 21750, 675.0912, 1.687079  
52256, 21910, 675.0293, 1.686924  
52257, 21958, 674.9674, 1.686769  
52258, 22106, 674.9055, 1.686614  
52259, 22406, 674.8435, 1.686460  
52260, 22564, 674.7816, 1.686305  
52261, 22286, 674.7197, 1.686150  
52262, 21626, 674.6577, 1.685995  
52263, 20982, 674.5958, 1.685840  
52264, 20692, 674.5339, 1.685686  
52265, 20714, 674.4720, 1.685531  
52266, 20720, 674.4100, 1.685376  
52267, 20494, 674.3481, 1.685221  
52268, 20194, 674.2862, 1.685067  
52269, 20074, 674.2243, 1.684912  
52270, 20108, 674.1623, 1.684757  
52271, 19920, 674.1004, 1.684602  
52272, 19186, 674.0385, 1.684448  
52273, 18104, 673.9765, 1.684293  
52274, 17318, 673.9146, 1.684138  
52275, 17372, 673.8527, 1.683983  
52276, 18212, 673.7908, 1.683829  
52277, 19284, 673.7288, 1.683674  
52278, 20036, 673.6669, 1.683519  
52279, 20396, 673.6050, 1.683364  
52280, 20616, 673.5431, 1.683210  
52281, 20878, 673.4811, 1.683055  
52282, 21042, 673.4192, 1.682900  
52283, 20902, 673.3573, 1.682745  
52284, 20546, 673.2954, 1.682591  
52285, 20374, 673.2334, 1.682436  
52286, 20702, 673.1715, 1.682281  
52287, 21386, 673.1096, 1.682126  
52288, 21896, 673.0476, 1.681972  
52289, 21794, 672.9857, 1.681817  
52290, 21142, 672.9238, 1.681662  
52291, 20426, 672.8619, 1.681507  
52292, 20098, 672.7999, 1.681353  
52293, 20228, 672.7380, 1.681198  
52294, 20580, 672.6761, 1.681043  
52295, 20868, 672.6142, 1.680888  
52296, 20984, 672.5522, 1.680733  
52297, 20934, 672.4903, 1.680579  
52298, 20696, 672.4284, 1.680424  
52299, 20254, 672.3664, 1.680269  
52300, 19712, 672.3045, 1.680114  
52301, 19370, 672.2426, 1.679960  
52302, 19528, 672.1807, 1.679805  
52303, 20238, 672.1187, 1.679650  
52304, 21248, 672.0568, 1.679495  
52305, 22184, 671.9949, 1.679341  
52306, 22816, 671.9330, 1.679186  
52307, 23124, 671.8710, 1.679031  
52308, 23186, 671.8091, 1.678876  
52309, 23058, 671.7472, 1.678722  
52310, 22784, 671.6853, 1.678567  
52311, 22492, 671.6233, 1.678412  
52312, 22352, 671.5614, 1.678257  
52313, 22452, 671.4995, 1.678103  
52314, 22694, 671.4375, 1.677948  
52315, 22830, 671.3756, 1.677793  
52316, 22668, 671.3137, 1.677638  
52317, 22224, 671.2518, 1.677484  
52318, 21714, 671.1898, 1.677329  
52319, 21408, 671.1279, 1.677174  
52320, 21488, 671.0660, 1.677019  
52321, 21944, 671.0041, 1.676865  
52322, 22580, 670.9421, 1.676710  
52323, 23064, 670.8802, 1.676555  
52324, 23088, 670.8183, 1.676400  
52325, 22588, 670.7563, 1.676246  
52326, 21852, 670.6944, 1.676091  
52327, 21386, 670.6325, 1.675936  
52328, 21510, 670.5706, 1.675781  
52329, 22076, 670.5086, 1.675626  
52330, 22542, 670.4467, 1.675472  
52331, 22450, 670.3848, 1.675317  
52332, 21816, 670.3229, 1.675162  
52333, 21104, 670.2609, 1.675007  
52334, 20768, 670.1990, 1.674853  
52335, 20836, 670.1371, 1.674698  
52336, 20936, 670.0752, 1.674543  
52337, 20716, 670.0132, 1.674388  
52338, 20212, 669.9513, 1.674234  
52339, 19778, 669.8894, 1.674079  
52340, 19724, 669.8274, 1.673924  
52341, 20066, 669.7655, 1.673769  
52342, 20608, 669.7036, 1.673615  
52343, 21196, 669.6417, 1.673460  
52344, 21822, 669.5797, 1.673305  
52345, 22452, 669.5178, 1.673150  
52346, 22862, 669.4559, 1.672996  
52347, 22774, 669.3940, 1.672841  
52348, 22184, 669.3320, 1.672686  
52349, 21488, 669.2701, 1.672531  
52350, 21200, 669.2082, 1.672377  
52351, 21498, 669.1462, 1.672222  
52352, 22042, 669.0843, 1.672067  
52353, 22312, 669.0224, 1.671912  
52354, 22080, 668.9605, 1.671758  
52355, 21636, 668.8985, 1.671603  
52356, 21440, 668.8366, 1.671448  
52357, 21692, 668.7747, 1.671293  
52358, 22156, 668.7128, 1.671139  
52359, 22418, 668.6508, 1.670984  
52360, 22250, 668.5889, 1.670829  
52361, 21722, 668.5270, 1.670674  
52362, 21046, 668.4651, 1.670519  
52363, 20380, 668.4031, 1.670365  
52364, 19772, 668.3412, 1.670210  
52365, 19246, 668.2793, 1.670055  
52366, 18860, 668.2173, 1.669900  
52367, 18668, 668.1554, 1.669746  
52368, 18686, 668.0935, 1.669591  
52369, 18922, 668.0316, 1.669436  
52370, 19420, 667.9696, 1.669281  
52371, 20192, 667.9077, 1.669127  
52372, 21076, 667.8458, 1.668972  
52373, 21692, 667.7839, 1.668817  
52374, 21670, 667.7219, 1.668662  
52375, 20944, 667.6600, 1.668508  
52376, 19904, 667.5981, 1.668353  
52377, 19110, 667.5361, 1.668198  
52378, 18968, 667.4742, 1.668043  
52379, 19492, 667.4123, 1.667889  
52380, 20414, 667.3504, 1.667734  
52381, 21406, 667.2884, 1.667579  
52382, 22204, 667.2265, 1.667424  
52383, 22572, 667.1646, 1.667270  
52384, 22376, 667.1027, 1.667115  
52385, 21682, 667.0407, 1.666960  
52386, 20902, 666.9788, 1.666805  
52387, 20594, 666.9169, 1.666651  
52388, 21070, 666.8550, 1.666496  
52389, 22098, 666.7930, 1.666341  
52390, 23064, 666.7311, 1.666186  
52391, 23452, 666.6692, 1.666032  
52392, 23180, 666.6072, 1.665877  
52393, 22534, 666.5453, 1.665722  
52394, 21794, 666.4834, 1.665567  
52395, 20990, 666.4215, 1.665412  
52396, 20032, 666.3595, 1.665258  
52397, 19008, 666.2976, 1.665103  
52398, 18214, 666.2357, 1.664948

52399, 17900, 666.1738, 1.664793  
52400, 17968, 666.1118, 1.664639  
52401, 18050, 666.0499, 1.664484  
52402, 17896, 665.9880, 1.664329  
52403, 17648, 665.9260, 1.664174  
52404, 17702, 665.8641, 1.664020  
52405, 18292, 665.8022, 1.663865  
52406, 19234, 665.7403, 1.663710  
52407, 20132, 665.6783, 1.663555  
52408, 20760, 665.6164, 1.663401  
52409, 21200, 665.5545, 1.663246  
52410, 21622, 665.4926, 1.663091  
52411, 22002, 665.4306, 1.662936  
52412, 22138, 665.3687, 1.662782  
52413, 21924, 665.3068, 1.662627  
52414, 21564, 665.2449, 1.662472  
52415, 21410, 665.1829, 1.662317  
52416, 21592, 665.1210, 1.662163  
52417, 21852, 665.0591, 1.662008  
52418, 21806, 664.9971, 1.661853  
52419, 21296, 664.9352, 1.661698  
52420, 20530, 664.8733, 1.661544  
52421, 19848, 664.8114, 1.661389  
52422, 19358, 664.7494, 1.661234  
52423, 18908, 664.6875, 1.661079  
52424, 18310, 664.6256, 1.660925  
52425, 17588, 664.5637, 1.660770  
52426, 16954, 664.5017, 1.660615  
52427, 16590, 664.4398, 1.660460  
52428, 16526, 664.3779, 1.660305  
52429, 16682, 664.3159, 1.660151  
52430, 17046, 664.2540, 1.659996  
52431, 17680, 664.1921, 1.659841  
52432, 18594, 664.1302, 1.659686  
52433, 19642, 664.0682, 1.659532  
52434, 20570, 664.0063, 1.659377  
52435, 21188, 663.9444, 1.659222  
52436, 21414, 663.8825, 1.659067  
52437, 21228, 663.8205, 1.658913  
52438, 20618, 663.7586, 1.658758  
52439, 19662, 663.6967, 1.658603  
52440, 18616, 663.6348, 1.658448  
52441, 17852, 663.5728, 1.658294  
52442, 17614, 663.5109, 1.658139  
52443, 17802, 663.4490, 1.657984  
52444, 18086, 663.3870, 1.657829  
52445, 18236, 663.3251, 1.657675  
52446, 18344, 663.2632, 1.657520  
52447, 18706, 663.2013, 1.657365  
52448, 19456, 663.1393, 1.657210  
52449, 20402, 663.0774, 1.657056  
52450, 21190, 663.0155, 1.656901  
52451, 21652, 662.9536, 1.656746  
52452, 21882, 662.8916, 1.656591  
52453, 22058, 662.8297, 1.656437  
52454, 22140, 662.7678, 1.656282  
52455, 21960, 662.7059, 1.656127  
52456, 21494, 662.6439, 1.655972  
52457, 21030, 662.5820, 1.655818  
52458, 20928, 662.5201, 1.655663  
52459, 21234, 662.4581, 1.655508  
52460, 21530, 662.3962, 1.655353  
52461, 21342, 662.3343, 1.655198  
52462, 20600, 662.2724, 1.655044  
52463, 19758, 662.2104, 1.654889  
52464, 19356, 662.1485, 1.654734  
52465, 19534, 662.0866, 1.654579  
52466, 19936, 662.0247, 1.654425  
52467, 20112, 661.9627, 1.654270  
52468, 19952, 661.9008, 1.654115  
52469, 19668, 661.8389, 1.653960  
52470, 19500, 661.7769, 1.653806  
52471, 19442, 661.7150, 1.653651  
52472, 19356, 661.6531, 1.653496  
52473, 19260, 661.5912, 1.653341  
52474, 19388, 661.5292, 1.653187

52475, 19916, 661.4673, 1.653032  
52476, 20702, 661.4054, 1.652877  
52477, 21310, 661.3435, 1.652722  
52478, 21426, 661.2815, 1.652568  
52479, 21162, 661.2196, 1.652413  
52480, 20950, 661.1577, 1.652258  
52481, 21142, 661.0958, 1.652103  
52482, 21732, 661.0338, 1.651949  
52483, 22434, 660.9719, 1.651794  
52484, 22980, 660.9100, 1.651639  
52485, 23282, 660.8480, 1.651484  
52486, 23340, 660.7861, 1.651330  
52487, 23112, 660.7242, 1.651175  
52488, 22568, 660.6623, 1.651020  
52489, 21868, 660.6003, 1.650865  
52490, 21386, 660.5384, 1.650710  
52491, 21446, 660.4765, 1.650556  
52492, 22042, 660.4146, 1.650401  
52493, 22806, 660.3526, 1.650246  
52494, 23320, 660.2907, 1.650091  
52495, 23436, 660.2288, 1.649937  
52496, 23296, 660.1668, 1.649782  
52497, 23086, 660.1049, 1.649627  
52498, 22814, 660.0430, 1.649472  
52499, 22358, 659.9811, 1.649318  
52500, 21714, 659.9191, 1.649163  
52501, 21080, 659.8572, 1.649008  
52502, 20666, 659.7953, 1.648853  
52503, 20486, 659.7334, 1.648699  
52504, 20346, 659.6714, 1.648544  
52505, 20060, 659.6095, 1.648389  
52506, 19650, 659.5476, 1.648234  
52507, 19282, 659.4857, 1.648080  
52508, 19030, 659.4237, 1.647925  
52509, 18798, 659.3618, 1.647770  
52510, 18432, 659.2999, 1.647615  
52511, 17982, 659.2379, 1.647461  
52512, 17674, 659.1760, 1.647306  
52513, 17702, 659.1141, 1.647151  
52514, 18024, 659.0522, 1.646996  
52515, 18388, 658.9902, 1.646842  
52516, 18590, 658.9283, 1.646687  
52517, 18608, 658.8664, 1.646532  
52518, 18552, 658.8045, 1.646377  
52519, 18484, 658.7425, 1.646223  
52520, 18428, 658.6806, 1.646068  
52521, 18452, 658.6187, 1.645913  
52522, 18728, 658.5567, 1.645758  
52523, 19374, 658.4948, 1.645603  
52524, 20210, 658.4329, 1.645449  
52525, 20778, 658.3710, 1.645294  
52526, 20686, 658.3090, 1.645139  
52527, 19972, 658.2471, 1.644984  
52528, 19082, 658.1852, 1.644830  
52529, 18520, 658.1233, 1.644675  
52530, 18418, 658.0613, 1.644520  
52531, 18568, 657.9994, 1.644365  
52532, 18744, 657.9375, 1.644211  
52533, 18988, 657.8756, 1.644056  
52534, 19514, 657.8136, 1.643901  
52535, 20372, 657.7517, 1.643746  
52536, 21270, 657.6898, 1.643592  
52537, 21796, 657.6278, 1.643437  
52538, 21756, 657.5659, 1.643282  
52539, 21328, 657.5040, 1.643127  
52540, 20810, 657.4421, 1.642973  
52541, 20340, 657.3801, 1.642818  
52542, 19868, 657.3182, 1.642663  
52543, 19330, 657.2563, 1.642508  
52544, 18868, 657.1944, 1.642354  
52545, 18704, 657.1324, 1.642199  
52546, 18908, 657.0705, 1.642044  
52547, 19268, 657.0086, 1.641889  
52548, 19494, 656.9466, 1.641735  
52549, 19458, 656.8847, 1.641580  
52550, 19288, 656.8228, 1.641425

52551, 19160, 656.7609, 1.641270  
52552, 19108, 656.6989, 1.641116  
52553, 19054, 656.6370, 1.640961  
52554, 18962, 656.5751, 1.640806  
52555, 18928, 656.5132, 1.640651  
52556, 19076, 656.4512, 1.640496  
52557, 19396, 656.3893, 1.640342  
52558, 19748, 656.3274, 1.640187  
52559, 20038, 656.2655, 1.640032  
52560, 20316, 656.2035, 1.639877  
52561, 20690, 656.1416, 1.639723  
52562, 21102, 656.0797, 1.639568  
52563, 21312, 656.0177, 1.639413  
52564, 21080, 655.9558, 1.639258  
52565, 20436, 655.8939, 1.639104  
52566, 19644, 655.8320, 1.638949  
52567, 19010, 655.7700, 1.638794  
52568, 18624, 655.7081, 1.638639  
52569, 18434, 655.6462, 1.638485  
52570, 18376, 655.5843, 1.638330  
52571, 18482, 655.5223, 1.638175  
52572, 18724, 655.4604, 1.638020  
52573, 18902, 655.3985, 1.637866  
52574, 18750, 655.3365, 1.637711  
52575, 18214, 655.2746, 1.637556  
52576, 17610, 655.2127, 1.637401  
52577, 17374, 655.1508, 1.637247  
52578, 17656, 655.0888, 1.637092  
52579, 18162, 655.0269, 1.636937  
52580, 18436, 654.9650, 1.636782  
52581, 18298, 654.9031, 1.636628  
52582, 17978, 654.8411, 1.636473  
52583, 17840, 654.7792, 1.636318  
52584, 18004, 654.7173, 1.636163  
52585, 18280, 654.6554, 1.636009  
52586, 18498, 654.5934, 1.635854  
52587, 18724, 654.5315, 1.635699  
52588, 19178, 654.4696, 1.635544  
52589, 19880, 654.4076, 1.635389  
52590, 20498, 654.3457, 1.635235  
52591, 20582, 654.2838, 1.635080  
52592, 20004, 654.2219, 1.634925  
52593, 19072, 654.1599, 1.634770  
52594, 18260, 654.0980, 1.634616  
52595, 17822, 654.0361, 1.634461  
52596, 17698, 653.9742, 1.634306  
52597, 17736, 653.9122, 1.634151  
52598, 17926, 653.8503, 1.633997  
52599, 18296, 653.7884, 1.633842  
52600, 18704, 653.7264, 1.633687  
52601, 18808, 653.6645, 1.633532  
52602, 18322, 653.6026, 1.633378  
52603, 17386, 653.5407, 1.633223  
52604, 16504, 653.4787, 1.633068  
52605, 16192, 653.4168, 1.632913  
52606, 16568, 653.3549, 1.632759  
52607, 17326, 653.2930, 1.632604  
52608, 18074, 653.2310, 1.632449  
52609, 18624, 653.1691, 1.632294  
52610, 18986, 653.1072, 1.632140  
52611, 19206, 653.0453, 1.631985  
52612, 19250, 652.9833, 1.631830  
52613, 19128, 652.9214, 1.631675  
52614, 18986, 652.8595, 1.631521  
52615, 19012, 652.7975, 1.631366  
52616, 19202, 652.7356, 1.631211  
52617, 19292, 652.6737, 1.631056  
52618, 19040, 652.6118, 1.630902  
52619, 18522, 652.5498, 1.630747  
52620, 18128, 652.4879, 1.630592  
52621, 18202, 652.4260, 1.630437  
52622, 18702, 652.3641, 1.630282  
52623, 19256, 652.3021, 1.630128  
52624, 19540, 652.2402, 1.629973  
52625, 19592, 652.1783, 1.629818  
52626, 19684, 652.1163, 1.629663

52627, 19920, 652.0544, 1.629509  
52628, 20064, 651.9925, 1.629354  
52629, 19784, 651.9306, 1.629199  
52630, 19054, 651.8686, 1.629044  
52631, 18276, 651.8067, 1.628890  
52632, 17930, 651.7448, 1.628735  
52633, 18140, 651.6829, 1.628580  
52634, 18616, 651.6209, 1.628425  
52635, 18996, 651.5590, 1.628271  
52636, 19168, 651.4971, 1.628116  
52637, 19282, 651.4352, 1.627961  
52638, 19444, 651.3732, 1.627806  
52639, 19588, 651.3113, 1.627652  
52640, 19582, 651.2494, 1.627497  
52641, 19436, 651.1874, 1.627342  
52642, 19342, 651.1255, 1.627187  
52643, 19402, 651.0636, 1.627033  
52644, 19452, 651.0017, 1.626878  
52645, 19228, 650.9397, 1.626723  
52646, 18726, 650.8778, 1.626568  
52647, 18328, 650.8159, 1.626414  
52648, 18516, 650.7540, 1.626259  
52649, 19366, 650.6920, 1.626104  
52650, 20414, 650.6301, 1.625949  
52651, 21024, 650.5682, 1.625795  
52652, 20890, 650.5062, 1.625640  
52653, 20262, 650.4443, 1.625485  
52654, 19630, 650.3824, 1.625330  
52655, 19318, 650.3205, 1.625175  
52656, 19278, 650.2585, 1.625021  
52657, 19306, 650.1966, 1.624866  
52658, 19256, 650.1347, 1.624711  
52659, 19104, 650.0728, 1.624556  
52660, 18858, 650.0108, 1.624402  
52661, 18476, 649.9489, 1.624247  
52662, 17984, 649.8870, 1.624092  
52663, 17530, 649.8251, 1.623937  
52664, 17308, 649.7631, 1.623783  
52665, 17380, 649.7012, 1.623628  
52666, 17604, 649.6393, 1.623473  
52667, 17800, 649.5773, 1.623318  
52668, 17936, 649.5154, 1.623164  
52669, 18132, 649.4535, 1.623009  
52670, 18440, 649.3916, 1.622854  
52671, 18668, 649.3296, 1.622699  
52672, 18512, 649.2677, 1.622545  
52673, 17884, 649.2058, 1.622390  
52674, 17078, 649.1439, 1.622235  
52675, 16550, 649.0819, 1.622080  
52676, 16524, 649.0200, 1.621926  
52677, 16794, 648.9581, 1.621771  
52678, 16958, 648.8962, 1.621616  
52679, 16812, 648.8342, 1.621461  
52680, 16552, 648.7723, 1.621307  
52681, 16556, 648.7104, 1.621152  
52682, 17042, 648.6484, 1.620997  
52683, 17886, 648.5865, 1.620842  
52684, 18760, 648.5246, 1.620688  
52685, 19388, 648.4627, 1.620533  
52686, 19682, 648.4007, 1.620378  
52687, 19722, 648.3388, 1.620223  
52688, 19624, 648.2769, 1.620068  
52689, 19496, 648.2150, 1.619914  
52690, 19398, 648.1530, 1.619759  
52691, 19322, 648.0911, 1.619604  
52692, 19178, 648.0292, 1.619449  
52693, 18884, 647.9672, 1.619295  
52694, 18478, 647.9053, 1.619140  
52695, 18166, 647.8434, 1.618985  
52696, 18164, 647.7815, 1.618830  
52697, 18498, 647.7195, 1.618676  
52698, 18978, 647.6576, 1.618521  
52699, 19330, 647.5957, 1.618366  
52700, 19446, 647.5338, 1.618211  
52701, 19412, 647.4718, 1.618057  
52702, 19324, 647.4099, 1.617902  
52703, 19150, 647.3480, 1.617747  
52704, 18786, 647.2861, 1.617592  
52705, 18300, 647.2241, 1.617438  
52706, 18008, 647.1622, 1.617283  
52707, 18236, 647.1003, 1.617128  
52708, 19012, 647.0383, 1.616973  
52709, 19952, 646.9764, 1.616819  
52710, 20568, 646.9145, 1.616664  
52711, 20660, 646.8526, 1.616509  
52712, 20430, 646.7906, 1.616354  
52713, 20198, 646.7287, 1.616200  
52714, 20074, 646.6668, 1.616045  
52715, 19926, 646.6049, 1.615890  
52716, 19658, 646.5429, 1.615735  
52717, 19400, 646.4810, 1.615581  
52718, 19458, 646.4191, 1.615426  
52719, 19948, 646.3571, 1.615271  
52720, 20678, 646.2952, 1.615116  
52721, 21292, 646.2333, 1.614961  
52722, 21584, 646.1714, 1.614807  
52723, 21634, 646.1094, 1.614652  
52724, 21624, 646.0475, 1.614497  
52725, 21584, 645.9856, 1.614342  
52726, 21384, 645.9237, 1.614188  
52727, 20932, 645.8617, 1.614033  
52728, 20346, 645.7998, 1.613878  
52729, 19886, 645.7379, 1.613723  
52730, 19706, 645.6760, 1.613569  
52731, 19740, 645.6140, 1.613414  
52732, 19788, 645.5521, 1.613259  
52733, 19704, 645.4902, 1.613104  
52734, 19468, 645.4282, 1.612950  
52735, 19108, 645.3663, 1.612795  
52736, 18668, 645.3044, 1.612640  
52737, 18232, 645.2425, 1.612485  
52738, 17996, 645.1805, 1.612331  
52739, 18158, 645.1186, 1.612176  
52740, 18694, 645.0567, 1.612021  
52741, 19308, 644.9948, 1.611866  
52742, 19628, 644.9328, 1.611712  
52743, 19570, 644.8709, 1.611557  
52744, 19392, 644.8090, 1.611402  
52745, 19426, 644.7470, 1.611247  
52746, 19674, 644.6851, 1.611093  
52747, 19796, 644.6232, 1.610938  
52748, 19480, 644.5613, 1.610783  
52749, 18828, 644.4993, 1.610628  
52750, 18330, 644.4374, 1.610474  
52751, 18388, 644.3755, 1.610319  
52752, 18894, 644.3136, 1.610164  
52753, 19330, 644.2516, 1.610009  
52754, 19264, 644.1897, 1.609854  
52755, 18752, 644.1278, 1.609700  
52756, 18244, 644.0659, 1.609545  
52757, 18132, 644.0039, 1.609390  
52758, 18388, 643.9420, 1.609235  
52759, 18684, 643.8801, 1.609081  
52760, 18774, 643.8181, 1.608926  
52761, 18712, 643.7562, 1.608771  
52762, 18748, 643.6943, 1.608616  
52763, 19004, 643.6324, 1.608462  
52764, 19348, 643.5704, 1.608307  
52765, 19538, 643.5085, 1.608152  
52766, 19434, 643.4466, 1.607997  
52767, 19054, 643.3847, 1.607843  
52768, 18502, 643.3227, 1.607688  
52769, 17910, 643.2608, 1.607533  
52770, 17434, 643.1989, 1.607378  
52771, 17254, 643.1369, 1.607224  
52772, 17416, 643.0750, 1.607069  
52773, 17748, 643.0131, 1.606914  
52774, 17918, 642.9512, 1.606759  
52775, 17714, 642.8892, 1.606605  
52776, 17288, 642.8273, 1.606450  
52777, 17014, 642.7654, 1.606295  
52778, 17128, 642.7035, 1.606140  
52779, 17466, 642.6415, 1.605986  
52780, 17620, 642.5796, 1.605831  
52781, 17354, 642.5177, 1.605676  
52782, 16854, 642.4558, 1.605521  
52783, 16530, 642.3938, 1.605366  
52784, 16568, 642.3319, 1.605212  
52785, 16736, 642.2700, 1.605057  
52786, 16668, 642.2080, 1.604902  
52787, 16274, 642.1461, 1.604747  
52788, 15872, 642.0842, 1.604593  
52789, 15878, 642.0223, 1.604438  
52790, 16368, 641.9603, 1.604283  
52791, 17034, 641.8984, 1.604128  
52792, 17466, 641.8365, 1.603974  
52793, 17540, 641.7746, 1.603819  
52794, 17436, 641.7126, 1.603664  
52795, 17374, 641.6507, 1.603509  
52796, 17380, 641.5888, 1.603355  
52797, 17308, 641.5268, 1.603200  
52798, 17074, 641.4649, 1.603045  
52799, 16760, 641.4030, 1.602890  
52800, 16562, 641.3411, 1.602736  
52801, 16592, 641.2791, 1.602581  
52802, 16872, 641.2172, 1.602426  
52803, 17392, 641.1553, 1.602271  
52804, 18168, 641.0934, 1.602117  
52805, 19136, 641.0314, 1.601962  
52806, 20098, 640.9695, 1.601807  
52807, 20780, 640.9076, 1.601652  
52808, 21008, 640.8457, 1.601498  
52809, 20874, 640.7837, 1.601343  
52810, 20602, 640.7218, 1.601188  
52811, 20340, 640.6599, 1.601033  
52812, 20060, 640.5979, 1.600879  
52813, 19672, 640.5360, 1.600724  
52814, 19230, 640.4741, 1.600569  
52815, 18934, 640.4122, 1.600414  
52816, 18942, 640.3502, 1.600259  
52817, 19204, 640.2883, 1.600105  
52818, 19490, 640.2264, 1.599950  
52819, 19638, 640.1645, 1.599795  
52820, 19682, 640.1025, 1.599640  
52821, 19758, 640.0406, 1.599486  
52822, 19920, 639.9787, 1.599331  
52823, 20052, 639.9167, 1.599176  
52824, 20022, 639.8548, 1.599021  
52825, 19820, 639.7929, 1.598867  
52826, 19546, 639.7310, 1.598712  
52827, 19262, 639.6690, 1.598557  
52828, 18912, 639.6071, 1.598402  
52829, 18444, 639.5452, 1.598248  
52830, 17984, 639.4833, 1.598093  
52831, 17776, 639.4213, 1.597938  
52832, 17974, 639.3594, 1.597783  
52833, 18426, 639.2975, 1.597629  
52834, 18770, 639.2356, 1.597474  
52835, 18758, 639.1736, 1.597319  
52836, 18488, 639.1117, 1.597164  
52837, 18270, 639.0498, 1.597010  
52838, 18352, 638.9878, 1.596855  
52839, 18712, 638.9259, 1.596700  
52840, 19152, 638.8640, 1.596545  
52841, 19516, 638.8021, 1.596391  
52842, 19772, 638.7401, 1.596236  
52843, 19910, 638.6782, 1.596081  
52844, 19824, 638.6163, 1.595926  
52845, 19452, 638.5544, 1.595772  
52846, 18884, 638.4924, 1.595617  
52847, 18414, 638.4305, 1.595462  
52848, 18302, 638.3686, 1.595307  
52849, 18550, 638.3066, 1.595152  
52850, 18950, 638.2447, 1.594998  
52851, 19360, 638.1828, 1.594843  
52852, 19880, 638.1209, 1.594688  
52853, 20682, 638.0589, 1.594533  
52854, 21692, 637.9970, 1.594379









53539, 19818, 595.5771, 1.488370  
53540, 19286, 595.5152, 1.488215  
53541, 18574, 595.4532, 1.488060  
53542, 17828, 595.3913, 1.487905  
53543, 17066, 595.3294, 1.487751  
53544, 16254, 595.2675, 1.487596  
53545, 15508, 595.2055, 1.487441  
53546, 15082, 595.1436, 1.487286  
53547, 15212, 595.0817, 1.487132  
53548, 15890, 595.0197, 1.486977  
53549, 16872, 594.9578, 1.486822  
53550, 17854, 594.8959, 1.486667  
53551, 18658, 594.8340, 1.486513  
53552, 19244, 594.7720, 1.486358  
53553, 19646, 594.7101, 1.486203  
53554, 19852, 594.6482, 1.486048  
53555, 19828, 594.5863, 1.485894  
53556, 19590, 594.5243, 1.485739  
53557, 19176, 594.4624, 1.485584  
53558, 18616, 594.4005, 1.485429  
53559, 17954, 594.3385, 1.485275  
53560, 17304, 594.2766, 1.485120  
53561, 16856, 594.2147, 1.484965  
53562, 16786, 594.1528, 1.484810  
53563, 17076, 594.0908, 1.484656  
53564, 17480, 594.0289, 1.484501  
53565, 17686, 593.9670, 1.484346  
53566, 17556, 593.9051, 1.484191  
53567, 17292, 593.8431, 1.484036  
53568, 17198, 593.7812, 1.483882  
53569, 17424, 593.7193, 1.483727  
53570, 17834, 593.6574, 1.483572  
53571, 18126, 593.5954, 1.483417  
53572, 18120, 593.5335, 1.483263  
53573, 17900, 593.4716, 1.483108  
53574, 17728, 593.4096, 1.482953  
53575, 17862, 593.3477, 1.482798  
53576, 18358, 593.2858, 1.482644  
53577, 19066, 593.2239, 1.482489  
53578, 19714, 593.1619, 1.482334  
53579, 20036, 593.1000, 1.482179  
53580, 19918, 593.0381, 1.482025  
53581, 19490, 592.9762, 1.481870  
53582, 19068, 592.9142, 1.481715  
53583, 18978, 592.8523, 1.481560  
53584, 19262, 592.7904, 1.481406  
53585, 19622, 592.7284, 1.481251  
53586, 19624, 592.6665, 1.481096  
53587, 19072, 592.6046, 1.480941  
53588, 18180, 592.5427, 1.480787  
53589, 17400, 592.4807, 1.480632  
53590, 17048, 592.4188, 1.480477  
53591, 17076, 592.3569, 1.480322  
53592, 17216, 592.2950, 1.480168  
53593, 17286, 592.2330, 1.480013  
53594, 17336, 592.1711, 1.479858  
53595, 17558, 592.1092, 1.479703  
53596, 17990, 592.0473, 1.479549  
53597, 18464, 591.9853, 1.479394  
53598, 18738, 591.9234, 1.479239  
53599, 18732, 591.8615, 1.479084  
53600, 18556, 591.7995, 1.478929  
53601, 18372, 591.7376, 1.478775  
53602, 18232, 591.6757, 1.478620  
53603, 18112, 591.6138, 1.478465  
53604, 18008, 591.5518, 1.478310  
53605, 18002, 591.4899, 1.478156  
53606, 18164, 591.4280, 1.478001  
53607, 18456, 591.3661, 1.477846  
53608, 18764, 591.3041, 1.477691  
53609, 19028, 591.2422, 1.477537  
53610, 19284, 591.1803, 1.477382  
53611, 19600, 591.1183, 1.477227  
53612, 19928, 591.0564, 1.477072  
53613, 20126, 590.9945, 1.476918  
53614, 20146, 590.9326, 1.476763

53615, 20164, 590.8706, 1.476608  
53616, 20490, 590.8087, 1.476453  
53617, 21270, 590.7468, 1.476299  
53618, 22296, 590.6849, 1.476144  
53619, 23094, 590.6229, 1.475989  
53620, 23300, 590.5610, 1.475834  
53621, 22904, 590.4991, 1.475680  
53622, 22242, 590.4372, 1.475525  
53623, 21702, 590.3752, 1.475370  
53624, 21462, 590.3133, 1.475215  
53625, 21464, 590.2514, 1.475061  
53626, 21560, 590.1894, 1.474906  
53627, 21662, 590.1275, 1.474751  
53628, 21802, 590.0656, 1.474596  
53629, 22022, 590.0037, 1.474441  
53630, 22314, 589.9417, 1.474287  
53631, 22580, 589.8798, 1.474132  
53632, 22680, 589.8179, 1.473977  
53633, 22506, 589.7560, 1.473822  
53634, 22082, 589.6940, 1.473668  
53635, 21576, 589.6321, 1.473513  
53636, 21212, 589.5702, 1.473358  
53637, 21102, 589.5082, 1.473203  
53638, 21124, 589.4463, 1.473049  
53639, 21004, 589.3844, 1.472894  
53640, 20542, 589.3225, 1.472739  
53641, 19830, 589.2605, 1.472584  
53642, 19154, 589.1986, 1.472430  
53643, 18732, 589.1367, 1.472275  
53644, 18486, 589.0748, 1.472120  
53645, 18126, 589.0128, 1.471965  
53646, 17442, 588.9509, 1.471811  
53647, 16528, 588.8890, 1.471656  
53648, 15708, 588.8271, 1.471501  
53649, 15206, 588.7651, 1.471346  
53650, 15006, 588.7032, 1.471192  
53651, 14952, 588.6413, 1.471037  
53652, 14998, 588.5793, 1.470882  
53653, 15248, 588.5174, 1.470727  
53654, 15764, 588.4555, 1.470573  
53655, 16358, 588.3936, 1.470418  
53656, 16714, 588.3316, 1.470263  
53657, 16668, 588.2697, 1.470108  
53658, 16406, 588.2078, 1.469954  
53659, 16254, 588.1459, 1.469799  
53660, 16320, 588.0839, 1.469644  
53661, 16372, 588.0220, 1.469489  
53662, 16100, 587.9601, 1.469334  
53663, 15538, 587.8981, 1.469180  
53664, 15098, 587.8362, 1.469025  
53665, 15226, 587.7743, 1.468870  
53666, 15986, 587.7124, 1.468715  
53667, 16998, 587.6504, 1.468561  
53668, 17826, 587.5885, 1.468406  
53669, 18304, 587.5266, 1.468251  
53670, 18554, 587.4647, 1.468096  
53671, 18728, 587.4027, 1.467942  
53672, 18832, 587.3408, 1.467787  
53673, 18814, 587.2789, 1.467632  
53674, 18742, 587.2170, 1.467477  
53675, 18794, 587.1550, 1.467323  
53676, 18994, 587.0931, 1.467168  
53677, 19124, 587.0312, 1.467013  
53678, 18938, 586.9692, 1.466858  
53679, 18468, 586.9073, 1.466704  
53680, 18120, 586.8454, 1.466549  
53681, 18252, 586.7835, 1.466394  
53682, 18766, 586.7215, 1.466239  
53683, 19162, 586.6596, 1.466085  
53684, 19024, 586.5977, 1.465930  
53685, 18458, 586.5358, 1.465775  
53686, 17994, 586.4738, 1.465620  
53687, 18004, 586.4119, 1.465466  
53688, 18312, 586.3500, 1.465311  
53689, 18436, 586.2880, 1.465156  
53690, 18146, 586.2261, 1.465001

53691, 17776, 586.1642, 1.464847  
53692, 17856, 586.1023, 1.464692  
53693, 18500, 586.0403, 1.464537  
53694, 19254, 585.9784, 1.464382  
53695, 19568, 585.9165, 1.464227  
53696, 19356, 585.8546, 1.464073  
53697, 19050, 585.7926, 1.463918  
53698, 19058, 585.7307, 1.463763  
53699, 19304, 585.6688, 1.463608  
53700, 19332, 585.6069, 1.463454  
53701, 18856, 585.5449, 1.463299  
53702, 18144, 585.4830, 1.463144  
53703, 17742, 585.4211, 1.462989  
53704, 17914, 585.3591, 1.462835  
53705, 18390, 585.2972, 1.462680  
53706, 18716, 585.2353, 1.462525  
53707, 18754, 585.1734, 1.462370  
53708, 18756, 585.1114, 1.462216  
53709, 18970, 585.0495, 1.462061  
53710, 19252, 584.9876, 1.461906  
53711, 19246, 584.9257, 1.461751  
53712, 18838, 584.8637, 1.461597  
53713, 18396, 584.8018, 1.461442  
53714, 18454, 584.7399, 1.461287  
53715, 19132, 584.6779, 1.461132  
53716, 20018, 584.6160, 1.460978  
53717, 20546, 584.5541, 1.460823  
53718, 20576, 584.4922, 1.460668  
53719, 20416, 584.4302, 1.460513  
53720, 20390, 584.3683, 1.460359  
53721, 20410, 584.3064, 1.460204  
53722, 20090, 584.2445, 1.460049  
53723, 19220, 584.1825, 1.459894  
53724, 18076, 584.1206, 1.459740  
53725, 17192, 584.0587, 1.459585  
53726, 16844, 583.9968, 1.459430  
53727, 16854, 583.9348, 1.459275  
53728, 16846, 583.8729, 1.459120  
53729, 16682, 583.8110, 1.458966  
53730, 16570, 583.7490, 1.458811  
53731, 16740, 583.6871, 1.458656  
53732, 17166, 583.6252, 1.458501  
53733, 17612, 583.5633, 1.458347  
53734, 17924, 583.5013, 1.458192  
53735, 18228, 583.4394, 1.458037  
53736, 18738, 583.3775, 1.457882  
53737, 19462, 583.3156, 1.457728  
53738, 20174, 583.2536, 1.457573  
53739, 20638, 583.1917, 1.457418  
53740, 20864, 583.1298, 1.457263  
53741, 21018, 583.0679, 1.457109  
53742, 21152, 583.0059, 1.456954  
53743, 21082, 582.9440, 1.456799  
53744, 20580, 582.8821, 1.456644  
53745, 19642, 582.8201, 1.456490  
53746, 18538, 582.7582, 1.456335  
53747, 17574, 582.6963, 1.456180  
53748, 16882, 582.6344, 1.456025  
53749, 16488, 582.5724, 1.455871  
53750, 16492, 582.5105, 1.455716  
53751, 17092, 582.4486, 1.455561  
53752, 18300, 582.3867, 1.455406  
53753, 19706, 582.3247, 1.455252  
53754, 20630, 582.2628, 1.455097  
53755, 20628, 582.2009, 1.454942  
53756, 19850, 582.1389, 1.454787  
53757, 18908, 582.0770, 1.454633  
53758, 18292, 582.0151, 1.454478  
53759, 18008, 581.9532, 1.454323  
53760, 17708, 581.8912, 1.454168  
53761, 17184, 581.8293, 1.454013  
53762, 16628, 581.7674, 1.453859  
53763, 16456, 581.7055, 1.453704  
53764, 16874, 581.6435, 1.453549  
53765, 17666, 581.5816, 1.453394  
53766, 18432, 581.5197, 1.453240

53767, 18904, 581.4578, 1.453085  
53768, 19072, 581.3958, 1.452930  
53769, 19056, 581.3339, 1.452775  
53770, 18952, 581.2720, 1.452621  
53771, 18868, 581.2100, 1.452466  
53772, 18942, 581.1481, 1.452311  
53773, 19286, 581.0862, 1.452156  
53774, 19764, 581.0243, 1.452002  
53775, 19988, 580.9623, 1.451847  
53776, 19638, 580.9004, 1.451692  
53777, 18816, 580.8385, 1.451537  
53778, 18056, 580.7766, 1.451383  
53779, 17878, 580.7146, 1.451228  
53780, 18336, 580.6527, 1.451073  
53781, 18978, 580.5908, 1.450918  
53782, 19278, 580.5288, 1.450764  
53783, 19114, 580.4669, 1.450609  
53784, 18748, 580.4050, 1.450454  
53785, 18476, 580.3431, 1.450299  
53786, 18334, 580.2811, 1.450145  
53787, 18192, 580.2192, 1.449990  
53788, 18088, 580.1573, 1.449835  
53789, 18260, 580.0954, 1.449680  
53790, 18862, 580.0334, 1.449526  
53791, 19666, 579.9715, 1.449371  
53792, 20184, 579.9096, 1.449216  
53793, 20102, 579.8477, 1.449061  
53794, 19598, 579.7857, 1.448906  
53795, 19136, 579.7238, 1.448752  
53796, 18966, 579.6619, 1.448597  
53797, 18884, 579.5999, 1.448442  
53798, 18540, 579.5380, 1.448287  
53799, 17886, 579.4761, 1.448133  
53800, 17276, 579.4142, 1.447978  
53801, 17074, 579.3522, 1.447823  
53802, 17220, 579.2903, 1.447668  
53803, 17316, 579.2284, 1.447514  
53804, 17088, 579.1665, 1.447359  
53805, 16706, 579.1045, 1.447204  
53806, 16612, 579.0426, 1.447049  
53807, 17006, 578.9807, 1.446895  
53808, 17626, 578.9187, 1.446740  
53809, 18034, 578.8568, 1.446585  
53810, 18104, 578.7949, 1.446430  
53811, 18070, 578.7330, 1.446276  
53812, 18184, 578.6710, 1.446121  
53813, 18342, 578.6091, 1.445966  
53814, 18214, 578.5472, 1.445811  
53815, 17714, 578.4853, 1.445657  
53816, 17220, 578.4233, 1.445502  
53817, 17262, 578.3614, 1.445347  
53818, 17930, 578.2995, 1.445192  
53819, 18724, 578.2376, 1.445038  
53820, 18984, 578.1756, 1.444883  
53821, 18518, 578.1137, 1.444728  
53822, 17728, 578.0518, 1.444573  
53823, 17170, 577.9898, 1.444419  
53824, 17046, 577.9279, 1.444264  
53825, 17148, 577.8660, 1.444109  
53826, 17220, 577.8041, 1.443954  
53827, 17304, 577.7421, 1.443799  
53828, 17592, 577.6802, 1.443645  
53829, 18088, 577.6183, 1.443490  
53830, 18504, 577.5564, 1.443335  
53831, 18562, 577.4944, 1.443180  
53832, 18360, 577.4325, 1.443026  
53833, 18302, 577.3706, 1.442871  
53834, 18688, 577.3086, 1.442716  
53835, 19360, 577.2467, 1.442561  
53836, 19874, 577.1848, 1.442407  
53837, 19942, 577.1229, 1.442252  
53838, 19704, 577.0609, 1.442097  
53839, 19498, 576.9990, 1.441942  
53840, 19438, 576.9371, 1.441788  
53841, 19286, 576.8752, 1.441633  
53842, 18736, 576.8132, 1.441478

53843, 17816, 576.7513, 1.441323  
53844, 16868, 576.6894, 1.441169  
53845, 16240, 576.6275, 1.441014  
53846, 15982, 576.5655, 1.440859  
53847, 15920, 576.5036, 1.440704  
53848, 15948, 576.4417, 1.440550  
53849, 16144, 576.3797, 1.440395  
53850, 16600, 576.3178, 1.440240  
53851, 17168, 576.2559, 1.440085  
53852, 17560, 576.1940, 1.439931  
53853, 17634, 576.1320, 1.439776  
53854, 17600, 576.0701, 1.439621  
53855, 17822, 576.0082, 1.439466  
53856, 18394, 575.9463, 1.439312  
53857, 18972, 575.8843, 1.439157  
53858, 19076, 575.8224, 1.439002  
53859, 18532, 575.7605, 1.438847  
53860, 17628, 575.6985, 1.438692  
53861, 16864, 575.6366, 1.438538  
53862, 16564, 575.5747, 1.438383  
53863, 16706, 575.5128, 1.438228  
53864, 17118, 575.4508, 1.438073  
53865, 17660, 575.3889, 1.437919  
53866, 18210, 575.3270, 1.437764  
53867, 18602, 575.2651, 1.437609  
53868, 18608, 575.2031, 1.437454  
53869, 18176, 575.1412, 1.437300  
53870, 17518, 575.0793, 1.437145  
53871, 16980, 575.0174, 1.436990  
53872, 16752, 574.9554, 1.436835  
53873, 16760, 574.8935, 1.436681  
53874, 16856, 574.8316, 1.436526  
53875, 17048, 574.7696, 1.436371  
53876, 17502, 574.7077, 1.436216  
53877, 18242, 574.6458, 1.436062  
53878, 18962, 574.5839, 1.435907  
53879, 19246, 574.5219, 1.435752  
53880, 18984, 574.4600, 1.435597  
53881, 18576, 574.3981, 1.435443  
53882, 18592, 574.3362, 1.435288  
53883, 19210, 574.2742, 1.435133  
53884, 20052, 574.2123, 1.434978  
53885, 20528, 574.1504, 1.434824  
53886, 20416, 574.0884, 1.434669  
53887, 19996, 574.0265, 1.434514  
53888, 19700, 573.9646, 1.434359  
53889, 19616, 573.9027, 1.434205  
53890, 19442, 573.8407, 1.434050  
53891, 18886, 573.7788, 1.433895  
53892, 18072, 573.7169, 1.433740  
53893, 17420, 573.6550, 1.433585  
53894, 17260, 573.5930, 1.433431  
53895, 17500, 573.5311, 1.433276  
53896, 17766, 573.4692, 1.433121  
53897, 17814, 573.4073, 1.432966  
53898, 17748, 573.3453, 1.432812  
53899, 17860, 573.2834, 1.432657  
53900, 18262, 573.2215, 1.432502  
53901, 18810, 573.1595, 1.432347  
53902, 19272, 573.0976, 1.432193  
53903, 19570, 573.0357, 1.432038  
53904, 19782, 572.9738, 1.431883  
53905, 19970, 572.9118, 1.431728  
53906, 20050, 572.8499, 1.431574  
53907, 19904, 572.7880, 1.431419  
53908, 19556, 572.7261, 1.431264  
53909, 19228, 572.6641, 1.431109  
53910, 19154, 572.6022, 1.430955  
53911, 19376, 572.5403, 1.430800  
53912, 19724, 572.4783, 1.430645  
53913, 19960, 572.4164, 1.430490  
53914, 19950, 572.3545, 1.430336  
53915, 19688, 572.2926, 1.430181  
53916, 19260, 572.2306, 1.430026  
53917, 18828, 572.1687, 1.429871  
53918, 18604, 572.1068, 1.429717

53919, 18784, 572.0449, 1.429562  
53920, 19374, 571.9829, 1.429407  
53921, 20116, 571.9210, 1.429252  
53922, 20572, 571.8591, 1.429097  
53923, 20452, 571.7972, 1.428943  
53924, 19786, 571.7352, 1.428788  
53925, 18896, 571.6733, 1.428633  
53926, 18126, 571.6114, 1.428478  
53927, 17642, 571.5494, 1.428324  
53928, 17458, 571.4875, 1.428169  
53929, 17528, 571.4256, 1.428014  
53930, 17830, 571.3637, 1.427859  
53931, 18294, 571.3017, 1.427705  
53932, 18760, 571.2398, 1.427550  
53933, 19082, 571.1779, 1.427395  
53934, 19310, 571.1160, 1.427240  
53935, 19658, 571.0540, 1.427086  
53936, 20300, 570.9921, 1.426931  
53937, 21134, 570.9302, 1.426776  
53938, 21852, 570.8683, 1.426621  
53939, 22208, 570.8063, 1.426467  
53940, 22246, 570.7444, 1.426312  
53941, 22202, 570.6825, 1.426157  
53942, 22208, 570.6205, 1.426002  
53943, 22134, 570.5586, 1.425848  
53944, 21764, 570.4967, 1.425693  
53945, 21114, 570.4348, 1.425538  
53946, 20500, 570.3728, 1.425383  
53947, 20250, 570.3109, 1.425229  
53948, 20432, 570.2490, 1.425074  
53949, 20802, 570.1871, 1.424919  
53950, 21096, 570.1251, 1.424764  
53951, 21280, 570.0632, 1.424610  
53952, 21454, 570.0013, 1.424455  
53953, 21584, 569.9393, 1.424300  
53954, 21406, 569.8774, 1.424145  
53955, 20708, 569.8155, 1.423990  
53956, 19652, 569.7536, 1.423836  
53957, 18754, 569.6916, 1.423681  
53958, 18484, 569.6297, 1.423526  
53959, 18870, 569.5678, 1.423371  
53960, 19508, 569.5059, 1.423217  
53961, 20012, 569.4439, 1.423062  
53962, 20294, 569.3820, 1.422907  
53963, 20486, 569.3201, 1.422752  
53964, 20594, 569.2582, 1.422598  
53965, 20362, 569.1962, 1.422443  
53966, 19568, 569.1343, 1.422288  
53967, 18420, 569.0724, 1.422133  
53968, 17512, 569.0104, 1.421979  
53969, 17332, 568.9485, 1.421824  
53970, 17788, 568.8866, 1.421669  
53971, 18264, 568.8247, 1.421514  
53972, 18218, 568.7627, 1.421360  
53973, 17716, 568.7008, 1.421205  
53974, 17330, 568.6389, 1.421050  
53975, 17580, 568.5770, 1.420895  
53976, 18398, 568.5150, 1.420741  
53977, 19240, 568.4531, 1.420586  
53978, 19586, 568.3912, 1.420431  
53979, 19392, 568.3292, 1.420276  
53980, 19042, 568.2673, 1.420122  
53981, 18942, 568.2054, 1.419967  
53982, 19210, 568.1435, 1.419812  
53983, 19688, 568.0815, 1.419657  
53984, 20160, 568.0196, 1.419503  
53985, 20516, 567.9577, 1.419348  
53986, 20700, 567.8958, 1.419193  
53987, 20668, 567.8338, 1.419038  
53988, 20380, 567.7719, 1.418883  
53989, 19922, 567.7100, 1.418729  
53990, 19466, 567.6481, 1.418574  
53991, 19152, 567.5861, 1.418419  
53992, 18966, 567.5242, 1.418264  
53993, 18806, 567.4623, 1.418110  
53994, 18602, 567.4003, 1.417955

53995, 18436, 567.3384, 1.417800  
53996, 18428, 567.2765, 1.417645  
53997, 18626, 567.2146, 1.417491  
53998, 18972, 567.1526, 1.417336  
53999, 19402, 567.0907, 1.417181  
54000, 19888, 567.0288, 1.417026  
54001, 20412, 566.9669, 1.416872  
54002, 20858, 566.9049, 1.416717  
54003, 21046, 566.8430, 1.416562  
54004, 20880, 566.7811, 1.416407  
54005, 20434, 566.7191, 1.416253  
54006, 19906, 566.6572, 1.416098  
54007, 19426, 566.5953, 1.415943  
54008, 19016, 566.5334, 1.415788  
54009, 18694, 566.4714, 1.415634  
54010, 18598, 566.4095, 1.415479  
54011, 18928, 566.3476, 1.415324  
54012, 19692, 566.2857, 1.415169  
54013, 20578, 566.2237, 1.415015  
54014, 21152, 566.1618, 1.414860  
54015, 21234, 566.0999, 1.414705  
54016, 21044, 566.0380, 1.414550  
54017, 20994, 565.9760, 1.414396  
54018, 21262, 565.9141, 1.414241  
54019, 21614, 565.8522, 1.414086  
54020, 21680, 565.7902, 1.413931  
54021, 21342, 565.7283, 1.413776  
54022, 20844, 565.6664, 1.413622  
54023, 20542, 565.6045, 1.413467  
54024, 20586, 565.5425, 1.413312  
54025, 20834, 565.4806, 1.413157  
54026, 21084, 565.4187, 1.413003  
54027, 21238, 565.3568, 1.412848  
54028, 21276, 565.2948, 1.412693  
54029, 21076, 565.2329, 1.412538  
54030, 20456, 565.1710, 1.412384  
54031, 19406, 565.1090, 1.412229  
54032, 18268, 565.0471, 1.412074  
54033, 17532, 564.9852, 1.411919  
54034, 17446, 564.9233, 1.411765  
54035, 17774, 564.8613, 1.411610  
54036, 18026, 564.7994, 1.411455  
54037, 17908, 564.7375, 1.411300  
54038, 17548, 564.6756, 1.411146  
54039, 17280, 564.6136, 1.410991  
54040, 17240, 564.5517, 1.410836  
54041, 17286, 564.4898, 1.410681  
54042, 17264, 564.4279, 1.410527  
54043, 17302, 564.3659, 1.410372  
54044, 17726, 564.3040, 1.410217  
54045, 18650, 564.2421, 1.410062  
54046, 19744, 564.1801, 1.409908  
54047, 20442, 564.1182, 1.409753  
54048, 20448, 564.0563, 1.409598  
54049, 19988, 563.9944, 1.409443  
54050, 19578, 563.9324, 1.409289  
54051, 19536, 563.8705, 1.409134  
54052, 19768, 563.8086, 1.408979  
54053, 19958, 563.7467, 1.408824  
54054, 19944, 563.6847, 1.408669  
54055, 19780, 563.6228, 1.408515  
54056, 19544, 563.5609, 1.408360  
54057, 19178, 563.4989, 1.408205  
54058, 18584, 563.4370, 1.408050  
54059, 17868, 563.3751, 1.407896  
54060, 17368, 563.3132, 1.407741  
54061, 17372, 563.2512, 1.407586  
54062, 17784, 563.1893, 1.407431  
54063, 18152, 563.1274, 1.407277  
54064, 18058, 563.0655, 1.407122  
54065, 17488, 563.0035, 1.406967  
54066, 16810, 562.9416, 1.406812  
54067, 16404, 562.8797, 1.406658  
54068, 16382, 562.8178, 1.406503  
54069, 16610, 562.7558, 1.406348  
54070, 16964, 562.6939, 1.406193

54071, 17466, 562.6320, 1.406039  
54072, 18160, 562.5700, 1.405884  
54073, 18920, 562.5081, 1.405729  
54074, 19484, 562.4462, 1.405574  
54075, 19666, 562.3843, 1.405420  
54076, 19578, 562.3223, 1.405265  
54077, 19498, 562.2604, 1.405110  
54078, 19586, 562.1985, 1.404955  
54079, 19722, 562.1366, 1.404801  
54080, 19620, 562.0746, 1.404646  
54081, 19110, 562.0127, 1.404491  
54082, 18290, 561.9508, 1.404336  
54083, 17424, 561.8888, 1.404182  
54084, 16794, 561.8269, 1.404027  
54085, 16580, 561.7650, 1.403872  
54086, 16862, 561.7031, 1.403717  
54087, 17560, 561.6411, 1.403562  
54088, 18372, 561.5792, 1.403408  
54089, 18846, 561.5173, 1.403253  
54090, 18620, 561.4554, 1.403098  
54091, 17886, 561.3934, 1.402943  
54092, 17018, 561.3315, 1.402789  
54093, 16606, 561.2696, 1.402634  
54094, 16820, 561.2077, 1.402479  
54095, 17378, 561.1457, 1.402324  
54096, 17852, 561.0838, 1.402170  
54097, 18104, 561.0219, 1.402015  
54098, 18370, 560.9599, 1.401860  
54099, 18918, 560.8980, 1.401705  
54100, 19730, 560.8361, 1.401551  
54101, 20462, 560.7742, 1.401396  
54102, 20780, 560.7122, 1.401241  
54103, 20660, 560.6503, 1.401086  
54104, 20348, 560.5884, 1.400932  
54105, 20082, 560.5265, 1.400777  
54106, 19898, 560.4645, 1.400622  
54107, 19702, 560.4026, 1.400467  
54108, 19476, 560.3407, 1.400313  
54109, 19320, 560.2787, 1.400158  
54110, 19302, 560.2168, 1.400003  
54111, 19332, 560.1549, 1.399848  
54112, 19276, 560.0930, 1.399694  
54113, 19146, 560.0310, 1.399539  
54114, 19176, 559.9691, 1.399384  
54115, 19626, 559.9072, 1.399229  
54116, 20438, 559.8453, 1.399075  
54117, 21220, 559.7833, 1.398920  
54118, 21518, 559.7214, 1.398765  
54119, 21178, 559.6595, 1.398610  
54120, 20464, 559.5976, 1.398455  
54121, 19806, 559.5356, 1.398301  
54122, 19504, 559.4737, 1.398146  
54123, 19584, 559.4118, 1.397991  
54124, 19890, 559.3498, 1.397836  
54125, 20212, 559.2879, 1.397682  
54126, 20388, 559.2260, 1.397527  
54127, 20344, 559.1641, 1.397372  
54128, 20118, 559.1021, 1.397217  
54129, 19878, 559.0402, 1.397063  
54130, 19826, 558.9783, 1.396908  
54131, 20006, 558.9164, 1.396753  
54132, 20224, 558.8544, 1.396598  
54133, 20210, 558.7925, 1.396444  
54134, 19934, 558.7306, 1.396289  
54135, 19686, 558.6686, 1.396134  
54136, 19838, 558.6067, 1.395979  
54137, 20458, 558.5448, 1.395825  
54138, 21154, 558.4829, 1.395670  
54139, 21350, 558.4209, 1.395515  
54140, 20774, 558.3590, 1.395360  
54141, 19676, 558.2971, 1.395206  
54142, 18598, 558.2352, 1.395051  
54143, 17964, 558.1732, 1.394896  
54144, 17838, 558.1113, 1.394741  
54145, 17990, 558.0494, 1.394587  
54146, 18188, 557.9875, 1.394432

54147, 18302, 557.9255, 1.394277  
54148, 18274, 557.8636, 1.394122  
54149, 18050, 557.8017, 1.393968  
54150, 17646, 557.7397, 1.393813  
54151, 17242, 557.6778, 1.393658  
54152, 17104, 557.6159, 1.393503  
54153, 17416, 557.5540, 1.393348  
54154, 18100, 557.4920, 1.393194  
54155, 18872, 557.4301, 1.393039  
54156, 19494, 557.3682, 1.392884  
54157, 19886, 557.3063, 1.392729  
54158, 20080, 557.2443, 1.392575  
54159, 20042, 557.1824, 1.392420  
54160, 19672, 557.1205, 1.392265  
54161, 18936, 557.0586, 1.392110  
54162, 18008, 556.9966, 1.391956  
54163, 17204, 556.9347, 1.391801  
54164, 16780, 556.8728, 1.391646  
54165, 16762, 556.8108, 1.391491  
54166, 17020, 556.7489, 1.391337  
54167, 17456, 556.6870, 1.391182  
54168, 18034, 556.6251, 1.391027  
54169, 18700, 556.5631, 1.390872  
54170, 19252, 556.5012, 1.390718  
54171, 19444, 556.4393, 1.390563  
54172, 19218, 556.3774, 1.390408  
54173, 18776, 556.3154, 1.390253  
54174, 18438, 556.2535, 1.390099  
54175, 18386, 556.1916, 1.389944  
54176, 18580, 556.1296, 1.389789  
54177, 18906, 556.0677, 1.389634  
54178, 19330, 556.0058, 1.389480  
54179, 19872, 555.9439, 1.389325  
54180, 20412, 555.8819, 1.389170  
54181, 20642, 555.8200, 1.389015  
54182, 20312, 555.7581, 1.388861  
54183, 19560, 555.6962, 1.388706  
54184, 18908, 555.6342, 1.388551  
54185, 18902, 555.5723, 1.388396  
54186, 19632, 555.5104, 1.388241  
54187, 20674, 555.4485, 1.388087  
54188, 21422, 555.3865, 1.387932  
54189, 21544, 555.3246, 1.387777  
54190, 21110, 555.2627, 1.387622  
54191, 20346, 555.2007, 1.387468  
54192, 19390, 555.1388, 1.387313  
54193, 18252, 555.0769, 1.387158  
54194, 17042, 555.0150, 1.387003  
54195, 16030, 554.9530, 1.386849  
54196, 15496, 554.8911, 1.386694  
54197, 15488, 554.8292, 1.386539  
54198, 15816, 554.7673, 1.386384  
54199, 16256, 554.7053, 1.386230  
54200, 16760, 554.6434, 1.386075  
54201, 17380, 554.5815, 1.385920  
54202, 18066, 554.5195, 1.385765  
54203, 18576, 554.4576, 1.385611  
54204, 18676, 554.3957, 1.385456  
54205, 18396, 554.3338, 1.385301  
54206, 18062, 554.2718, 1.385146  
54207, 18010, 554.2099, 1.384992  
54208, 18338, 554.1480, 1.384837  
54209, 18902, 554.0861, 1.384682  
54210, 19564, 554.0241, 1.384527  
54211, 20326, 553.9622, 1.384373  
54212, 21216, 553.9003, 1.384218  
54213, 22084, 553.8384, 1.384063  
54214, 22580, 553.7764, 1.383908  
54215, 22436, 553.7145, 1.383753  
54216, 21718, 553.6526, 1.383599  
54217, 20792, 553.5906, 1.383444  
54218, 19996, 553.5287, 1.383289  
54219, 19408, 553.4668, 1.383134  
54220, 18920, 553.4049, 1.382980  
54221, 18520, 553.3429, 1.382825  
54222, 18378, 553.2810, 1.382670

54223, 18680, 553.2191, 1.382515  
54224, 19352, 553.1572, 1.382361  
54225, 20068, 553.0952, 1.382206  
54226, 20552, 553.0333, 1.382051  
54227, 20802, 552.9714, 1.381896  
54228, 21012, 552.9094, 1.381742  
54229, 21250, 552.8475, 1.381587  
54230, 21314, 552.7856, 1.381432  
54231, 20958, 552.7237, 1.381277  
54232, 20246, 552.6617, 1.381123  
54233, 19580, 552.5998, 1.380968  
54234, 19400, 552.5379, 1.380813  
54235, 19740, 552.4760, 1.380658  
54236, 20196, 552.4140, 1.380504  
54237, 20288, 552.3521, 1.380349  
54238, 19856, 552.2902, 1.380194  
54239, 19156, 552.2283, 1.380039  
54240, 18558, 552.1663, 1.379885  
54241, 18284, 552.1044, 1.379730  
54242, 18302, 552.0425, 1.379575  
54243, 18486, 551.9805, 1.379420  
54244, 18712, 551.9186, 1.379266  
54245, 18840, 551.8567, 1.379111  
54246, 18726, 551.7948, 1.378956  
54247, 18300, 551.7328, 1.378801  
54248, 17698, 551.6709, 1.378646  
54249, 17162, 551.6090, 1.378492  
54250, 16824, 551.5471, 1.378337  
54251, 16556, 551.4851, 1.378182  
54252, 16162, 551.4232, 1.378027  
54253, 15678, 551.3613, 1.377873  
54254, 15498, 551.2993, 1.377718  
54255, 16024, 551.2374, 1.377563  
54256, 17234, 551.1755, 1.377408  
54257, 18588, 551.1136, 1.377254  
54258, 19446, 551.0516, 1.377099  
54259, 19614, 550.9897, 1.376944  
54260, 19422, 550.9278, 1.376789  
54261, 19342, 550.8659, 1.376635  
54262, 19480, 550.8039, 1.376480  
54263, 19570, 550.7420, 1.376325  
54264, 19374, 550.6801, 1.376170  
54265, 19070, 550.6182, 1.376016  
54266, 19108, 550.5562, 1.375861  
54267, 19732, 550.4943, 1.375706  
54268, 20648, 550.4324, 1.375551  
54269, 21260, 550.3704, 1.375397  
54270, 21196, 550.3085, 1.375242  
54271, 20628, 550.2466, 1.375087  
54272, 20064, 550.1847, 1.374932  
54273, 19876, 550.1227, 1.374778  
54274, 20018, 550.0608, 1.374623  
54275, 20200, 549.9989, 1.374468  
54276, 20160, 549.9370, 1.374313  
54277, 19888, 549.8750, 1.374159  
54278, 19548, 549.8131, 1.374004  
54279, 19334, 549.7512, 1.373849  
54280, 19388, 549.6892, 1.373694  
54281, 19740, 549.6273, 1.373539  
54282, 20220, 549.5654, 1.373385  
54283, 20438, 549.5035, 1.373230  
54284, 20010, 549.4415, 1.373075  
54285, 18902, 549.3796, 1.372920  
54286, 17616, 549.3177, 1.372766  
54287, 16898, 549.2558, 1.372611  
54288, 17172, 549.1938, 1.372456  
54289, 18166, 549.1319, 1.372301  
54290, 19136, 549.0700, 1.372147  
54291, 19518, 549.0081, 1.371992  
54292, 19348, 548.9461, 1.371837  
54293, 19108, 548.8842, 1.371682  
54294, 19188, 548.8223, 1.371528  
54295, 19578, 548.7603, 1.371373  
54296, 20010, 548.6984, 1.371218  
54297, 20350, 548.6365, 1.371063  
54298, 20696, 548.5746, 1.370909

54299, 21112, 548.5126, 1.370754  
54300, 21372, 548.4507, 1.370599  
54301, 21118, 548.3888, 1.370444  
54302, 20262, 548.3269, 1.370290  
54303, 19188, 548.2649, 1.370135  
54304, 18464, 548.2030, 1.369980  
54305, 18302, 548.1411, 1.369825  
54306, 18400, 548.0791, 1.369671  
54307, 18310, 548.0172, 1.369516  
54308, 17922, 547.9553, 1.369361  
54309, 17544, 547.8934, 1.369206  
54310, 17500, 547.8314, 1.369052  
54311, 17752, 547.7695, 1.368897  
54312, 17954, 547.7076, 1.368742  
54313, 17902, 547.6457, 1.368587  
54314, 17758, 547.5837, 1.368432  
54315, 17856, 547.5218, 1.368278  
54316, 18258, 547.4599, 1.368123  
54317, 18648, 547.3980, 1.367968  
54318, 18714, 547.3360, 1.367813  
54319, 18544, 547.2741, 1.367659  
54320, 18542, 547.2122, 1.367504  
54321, 18982, 547.1502, 1.367349  
54322, 19632, 547.0883, 1.367194  
54323, 19966, 547.0264, 1.367040  
54324, 19736, 546.9645, 1.366885  
54325, 19272, 546.9025, 1.366730  
54326, 19130, 546.8406, 1.366575  
54327, 19508, 546.7787, 1.366421  
54328, 20014, 546.7168, 1.366266  
54329, 20070, 546.6548, 1.366111  
54330, 19498, 546.5929, 1.365956  
54331, 18670, 546.5310, 1.365802  
54332, 18098, 546.4690, 1.365647  
54333, 17950, 546.4071, 1.365492  
54334, 17994, 546.3452, 1.365337  
54335, 17972, 546.2833, 1.365183  
54336, 17880, 546.2213, 1.365028  
54337, 17926, 546.1594, 1.364873  
54338, 18218, 546.0975, 1.364718  
54339, 18600, 546.0356, 1.364564  
54340, 18860, 545.9736, 1.364409  
54341, 18986, 545.9117, 1.364254  
54342, 19150, 545.8498, 1.364099  
54343, 19480, 545.7879, 1.363945  
54344, 19860, 545.7259, 1.363790  
54345, 20082, 545.6640, 1.363635  
54346, 20112, 545.6021, 1.363480  
54347, 20154, 545.5401, 1.363325  
54348, 20388, 545.4782, 1.363171  
54349, 20724, 545.4163, 1.363016  
54350, 20860, 545.3544, 1.362861  
54351, 20600, 545.2924, 1.362706  
54352, 20094, 545.2305, 1.362552  
54353, 19686, 545.1686, 1.362397  
54354, 19528, 545.1067, 1.362242  
54355, 19434, 545.0447, 1.362087  
54356, 19140, 544.9828, 1.361933  
54357, 18654, 544.9209, 1.361778  
54358, 18312, 544.8589, 1.361623  
54359, 18448, 544.7970, 1.361468  
54360, 19038, 544.7351, 1.361314  
54361, 19696, 544.6732, 1.361159  
54362, 20030, 544.6112, 1.361004  
54363, 19958, 544.5493, 1.360849  
54364, 19702, 544.4874, 1.360695  
54365, 19514, 544.4255, 1.360540  
54366, 19462, 544.3635, 1.360385  
54367, 19500, 544.3016, 1.360230  
54368, 19618, 544.2397, 1.360076  
54369, 19906, 544.1778, 1.359921  
54370, 20374, 544.1158, 1.359766  
54371, 20902, 544.0539, 1.359611  
54372, 21306, 543.9920, 1.359457  
54373, 21496, 543.9300, 1.359302  
54374, 21528, 543.8681, 1.359147

54375, 21452, 543.8062, 1.358992  
54376, 21216, 543.7443, 1.358838  
54377, 20746, 543.6823, 1.358683  
54378, 20140, 543.6204, 1.358528  
54379, 19710, 543.5585, 1.358373  
54380, 19694, 543.4966, 1.358218  
54381, 20036, 543.4346, 1.358064  
54382, 20414, 543.3727, 1.357909  
54383, 20554, 543.3108, 1.357754  
54384, 20534, 543.2489, 1.357599  
54385, 20654, 543.1869, 1.357445  
54386, 21068, 543.1250, 1.357290  
54387, 21548, 543.0631, 1.357135  
54388, 21680, 543.0011, 1.356980  
54389, 21290, 542.9392, 1.356826  
54390, 20578, 542.8773, 1.356671  
54391, 19882, 542.8154, 1.356516  
54392, 19312, 542.7534, 1.356361  
54393, 18712, 542.6915, 1.356207  
54394, 17986, 542.6296, 1.356052  
54395, 17396, 542.5677, 1.355897  
54396, 17378, 542.5057, 1.355742  
54397, 18132, 542.4438, 1.355588  
54398, 19306, 542.3819, 1.355433  
54399, 20294, 542.3199, 1.355278  
54400, 20748, 542.2580, 1.355123  
54401, 20846, 542.1961, 1.354969  
54402, 21044, 542.1342, 1.354814  
54403, 21592, 542.0722, 1.354659  
54404, 22314, 542.0103, 1.354504  
54405, 22866, 541.9484, 1.354350  
54406, 23062, 541.8865, 1.354195  
54407, 22944, 541.8245, 1.354040  
54408, 22594, 541.7626, 1.353885  
54409, 21972, 541.7007, 1.353731  
54410, 21044, 541.6388, 1.353576  
54411, 20024, 541.5768, 1.353421  
54412, 19340, 541.5149, 1.353266  
54413, 19324, 541.4530, 1.353111  
54414, 19860, 541.3910, 1.352957  
54415, 20494, 541.3291, 1.352802  
54416, 20808, 541.2672, 1.352647  
54417, 20782, 541.2053, 1.352492  
54418, 20688, 541.1433, 1.352338  
54419, 20708, 541.0814, 1.352183  
54420, 20696, 541.0195, 1.352028  
54421, 20350, 540.9576, 1.351873  
54422, 19596, 540.8956, 1.351719  
54423, 18766, 540.8337, 1.351564  
54424, 18352, 540.7718, 1.351409  
54425, 18602, 540.7098, 1.351254  
54426, 19362, 540.6479, 1.351100  
54427, 20202, 540.5860, 1.350945  
54428, 20720, 540.5241, 1.350790  
54429, 20710, 540.4621, 1.350635  
54430, 20186, 540.4002, 1.350481  
54431, 19334, 540.3383, 1.350326  
54432, 18484, 540.2764, 1.350171  
54433, 18022, 540.2144, 1.350016  
54434, 18170, 540.1525, 1.349862  
54435, 18798, 540.0906, 1.349707  
54436, 19478, 540.0287, 1.349552  
54437, 19808, 539.9667, 1.349397  
54438, 19670, 539.9048, 1.349243  
54439, 19312, 539.8429, 1.349088  
54440, 19014, 539.7809, 1.348933  
54441, 18866, 539.7190, 1.348778  
54442, 18752, 539.6571, 1.348624  
54443, 18596, 539.5952, 1.348469  
54444, 18486, 539.5332, 1.348314  
54445, 18524, 539.4713, 1.348159  
54446, 18642, 539.4094, 1.348004  
54447, 18576, 539.3475, 1.347850  
54448, 18142, 539.2855, 1.347695  
54449, 17488, 539.2236, 1.347540  
54450, 17020, 539.1617, 1.347385

54451, 17064, 539.0997, 1.347231  
54452, 17570, 539.0378, 1.347076  
54453, 18234, 538.9759, 1.346921  
54454, 18772, 538.9140, 1.346766  
54455, 19168, 538.8520, 1.346612  
54456, 19504, 538.7901, 1.346457  
54457, 19762, 538.7282, 1.346302  
54458, 19744, 538.6663, 1.346147  
54459, 19318, 538.6043, 1.345993  
54460, 18622, 538.5424, 1.345838  
54461, 17994, 538.4805, 1.345683  
54462, 17680, 538.4186, 1.345528  
54463, 17630, 538.3566, 1.345374  
54464, 17590, 538.2947, 1.345219  
54465, 17420, 538.2328, 1.345064  
54466, 17236, 538.1708, 1.344909  
54467, 17266, 538.1089, 1.344755  
54468, 17626, 538.0470, 1.344600  
54469, 18196, 537.9851, 1.344445  
54470, 18756, 537.9231, 1.344290  
54471, 19118, 537.8612, 1.344136  
54472, 19162, 537.7993, 1.343981  
54473, 18840, 537.7374, 1.343826  
54474, 18220, 537.6754, 1.343671  
54475, 17564, 537.6135, 1.343517  
54476, 17296, 537.5516, 1.343362  
54477, 17702, 537.4896, 1.343207  
54478, 18628, 537.4277, 1.343052  
54479, 19506, 537.3658, 1.342897  
54480, 19764, 537.3039, 1.342743  
54481, 19288, 537.2419, 1.342588  
54482, 18456, 537.1800, 1.342433  
54483, 17786, 537.1181, 1.342278  
54484, 17498, 537.0562, 1.342124  
54485, 17482, 536.9942, 1.341969  
54486, 17592, 536.9323, 1.341814  
54487, 17876, 536.8704, 1.341659  
54488, 18436, 536.8085, 1.341505  
54489, 19132, 536.7465, 1.341350  
54490, 19528, 536.6846, 1.341195  
54491, 19286, 536.6227, 1.341040  
54492, 18578, 536.5607, 1.340886  
54493, 18054, 536.4988, 1.340731  
54494, 18302, 536.4369, 1.340576  
54495, 19300, 536.3750, 1.340421  
54496, 20448, 536.3130, 1.340267  
54497, 21108, 536.2511, 1.340112  
54498, 21156, 536.1892, 1.339957  
54499, 20940, 536.1273, 1.339802  
54500, 20854, 536.0653, 1.339648  
54501, 20914, 536.0034, 1.339493  
54502, 20862, 535.9415, 1.339338  
54503, 20548, 535.8795, 1.339183  
54504, 20170, 535.8176, 1.339029  
54505, 20064, 535.7557, 1.338874  
54506, 20394, 535.6938, 1.338719  
54507, 20994, 535.6318, 1.338564  
54508, 21624, 535.5699, 1.338409  
54509, 22146, 535.5080, 1.338255  
54510, 22556, 535.4461, 1.338100  
54511, 22800, 535.3841, 1.337945  
54512, 22720, 535.3222, 1.337790  
54513, 22256, 535.2603, 1.337636  
54514, 21612, 535.1984, 1.337481  
54515, 21178, 535.1364, 1.337326  
54516, 21186, 535.0745, 1.337171  
54517, 21474, 535.0126, 1.337017  
54518, 21650, 534.9506, 1.336862  
54519, 21470, 534.8887, 1.336707  
54520, 21060, 534.8268, 1.336552  
54521, 20730, 534.7649, 1.336398  
54522, 20624, 534.7029, 1.336243  
54523, 20596, 534.6410, 1.336088  
54524, 20436, 534.5791, 1.335933  
54525, 20138, 534.5172, 1.335779  
54526, 19946, 534.4552, 1.335624  
54527, 20052, 534.3933, 1.335469  
54528, 20372, 534.3314, 1.335314  
54529, 20630, 534.2694, 1.335160  
54530, 20620, 534.2075, 1.335005  
54531, 20380, 534.1456, 1.334850  
54532, 20086, 534.0837, 1.334695  
54533, 19836, 534.0217, 1.334541  
54534, 19596, 533.9598, 1.334386  
54535, 19330, 533.8979, 1.334231  
54536, 19124, 533.8360, 1.334076  
54537, 19056, 533.7740, 1.333922  
54538, 19064, 533.7121, 1.333767  
54539, 18940, 533.6502, 1.333612  
54540, 18592, 533.5883, 1.333457  
54541, 18232, 533.5263, 1.333302  
54542, 18276, 533.4644, 1.333148  
54543, 18980, 533.4025, 1.332993  
54544, 20180, 533.3405, 1.332838  
54545, 21406, 533.2786, 1.332683  
54546, 22240, 533.2167, 1.332529  
54547, 22582, 533.1548, 1.332374  
54548, 22576, 533.0928, 1.332219  
54549, 22322, 533.0309, 1.332064  
54550, 21784, 532.9690, 1.331910  
54551, 20928, 532.9071, 1.331755  
54552, 19916, 532.8451, 1.331600  
54553, 19010, 532.7832, 1.331445  
54554, 18394, 532.7213, 1.331291  
54555, 18004, 532.6593, 1.331136  
54556, 17666, 532.5974, 1.330981  
54557, 17346, 532.5355, 1.330826  
54558, 17168, 532.4736, 1.330672  
54559, 17240, 532.4116, 1.330517  
54560, 17482, 532.3497, 1.330362  
54561, 17658, 532.2878, 1.330207  
54562, 17642, 532.2259, 1.330053  
54563, 17542, 532.1639, 1.329898  
54564, 17566, 532.1020, 1.329743  
54565, 17776, 532.0401, 1.329588  
54566, 18044, 531.9782, 1.329434  
54567, 18276, 531.9162, 1.329279  
54568, 18568, 531.8543, 1.329124  
54569, 19102, 531.7924, 1.328969  
54570, 19838, 531.7304, 1.328815  
54571, 20410, 531.6685, 1.328660  
54572, 20394, 531.6066, 1.328505  
54573, 19730, 531.5447, 1.328350  
54574, 18784, 531.4827, 1.328195  
54575, 18024, 531.4208, 1.328041  
54576, 17590, 531.3589, 1.327886  
54577, 17278, 531.2970, 1.327731  
54578, 16910, 531.2350, 1.327576  
54579, 16618, 531.1731, 1.327422  
54580, 16720, 531.1112, 1.327267  
54581, 17276, 531.0493, 1.327112  
54582, 17896, 530.9873, 1.326957  
54583, 18076, 530.9254, 1.326803  
54584, 17690, 530.8635, 1.326648  
54585, 17178, 530.8015, 1.326493  
54586, 17106, 530.7396, 1.326338  
54587, 17650, 530.6777, 1.326184  
54588, 18470, 530.6158, 1.326029  
54589, 19138, 530.5538, 1.325874  
54590, 19548, 530.4919, 1.325719  
54591, 19926, 530.4300, 1.325565  
54592, 20408, 530.3681, 1.325410  
54593, 20776, 530.3061, 1.325255  
54594, 20652, 530.2442, 1.325100  
54595, 19962, 530.1823, 1.324946  
54596, 19118, 530.1203, 1.324791  
54597, 18672, 530.0584, 1.324636  
54598, 18824, 529.9965, 1.324481  
54599, 19270, 529.9346, 1.324327  
54600, 19566, 529.8726, 1.324172  
54601, 19544, 529.8107, 1.324017  
54602, 19390, 529.7488, 1.323862  
54603, 19322, 529.6869, 1.323708  
54604, 19346, 529.6249, 1.323553  
54605, 19314, 529.5630, 1.323398  
54606, 19166, 529.5011, 1.323243  
54607, 19010, 529.4392, 1.323088  
54608, 18936, 529.3772, 1.322934  
54609, 18822, 529.3153, 1.322779  
54610, 18440, 529.2534, 1.322624  
54611, 17772, 529.1914, 1.322469  
54612, 17172, 529.1295, 1.322315  
54613, 17086, 529.0676, 1.322160  
54614, 17624, 529.0057, 1.322005  
54615, 18430, 528.9437, 1.321850  
54616, 18992, 528.8818, 1.321696  
54617, 19132, 528.8199, 1.321541  
54618, 19090, 528.7580, 1.321386  
54619, 19204, 528.6960, 1.321231  
54620, 19524, 528.6341, 1.321077  
54621, 19794, 528.5722, 1.320922  
54622, 19796, 528.5102, 1.320767  
54623, 19602, 528.4483, 1.320612  
54624, 19468, 528.3864, 1.320458  
54625, 19512, 528.3245, 1.320303  
54626, 19568, 528.2625, 1.320148  
54627, 19378, 528.2006, 1.319993  
54628, 18922, 528.1387, 1.319839  
54629, 18452, 528.0768, 1.319684  
54630, 18228, 528.0148, 1.319529  
54631, 18242, 527.9529, 1.319374  
54632, 18254, 527.8910, 1.319220  
54633, 18096, 527.8291, 1.319065  
54634, 17870, 527.7671, 1.318910  
54635, 17842, 527.7052, 1.318755  
54636, 18138, 527.6433, 1.318601  
54637, 18580, 527.5813, 1.318446  
54638, 18864, 527.5194, 1.318291  
54639, 18792, 527.4575, 1.318136  
54640, 18428, 527.3956, 1.317981  
54641, 17956, 527.3336, 1.317827  
54642, 17538, 527.2717, 1.317672  
54643, 17276, 527.2098, 1.317517  
54644, 17250, 527.1479, 1.317362  
54645, 17534, 527.0859, 1.317208  
54646, 18098, 527.0240, 1.317053  
54647, 18748, 526.9621, 1.316898  
54648, 19242, 526.9001, 1.316743  
54649, 19468, 526.8382, 1.316589  
54650, 19508, 526.7763, 1.316434  
54651, 19520, 526.7144, 1.316279  
54652, 19566, 526.6524, 1.316124  
54653, 19572, 526.5905, 1.315970  
54654, 19460, 526.5286, 1.315815  
54655, 19252, 526.4667, 1.315660  
54656, 19034, 526.4047, 1.315505  
54657, 18810, 526.3428, 1.315351  
54658, 18532, 526.2809, 1.315196  
54659, 18222, 526.2190, 1.315041  
54660, 18074, 526.1570, 1.314886  
54661, 18336, 526.0951, 1.314732  
54662, 18980, 526.0332, 1.314577  
54663, 19622, 525.9712, 1.314422  
54664, 19750, 525.9093, 1.314267  
54665, 19164, 525.8474, 1.314113  
54666, 18214, 525.7855, 1.313958  
54667, 17472, 525.7235, 1.313803  
54668, 17328, 525.6616, 1.313648  
54669, 17706, 525.5997, 1.313494  
54670, 18296, 525.5378, 1.313339  
54671, 18876, 525.4758, 1.313184  
54672, 19458, 525.4139, 1.313029  
54673, 20070, 525.3520, 1.312874  
54674, 20584, 525.2900, 1.312720  
54675, 20774, 525.2281, 1.312565  
54676, 20576, 525.1662, 1.312410  
54677, 20228, 525.1043, 1.312255  
54678, 20064, 525.0423, 1.312101

54679, 20220, 524.9804, 1.311946  
54680, 20528, 524.9185, 1.311791  
54681, 20782, 524.8566, 1.311636  
54682, 20944, 524.7946, 1.311482  
54683, 21164, 524.7327, 1.311327  
54684, 21488, 524.6708, 1.311172  
54685, 21702, 524.6089, 1.311017  
54686, 21506, 524.5469, 1.310863  
54687, 20874, 524.4850, 1.310708  
54688, 20192, 524.4231, 1.310553  
54689, 19920, 524.3611, 1.310398  
54690, 20178, 524.2992, 1.310244  
54691, 20594, 524.2373, 1.310089  
54692, 20644, 524.1754, 1.309934  
54693, 20110, 524.1134, 1.309779  
54694, 19276, 524.0515, 1.309625  
54695, 18634, 523.9896, 1.309470  
54696, 18508, 523.9277, 1.309315  
54697, 18856, 523.8657, 1.309160  
54698, 19398, 523.8038, 1.309006  
54699, 19850, 523.7419, 1.308851  
54700, 20068, 523.6799, 1.308696  
54701, 20016, 523.6180, 1.308541  
54702, 19748, 523.5561, 1.308387  
54703, 19400, 523.4942, 1.308232  
54704, 19154, 523.4322, 1.308077  
54705, 19170, 523.3703, 1.307922  
54706, 19470, 523.3084, 1.307767  
54707, 19950, 523.2465, 1.307613  
54708, 20500, 523.1845, 1.307458  
54709, 21060, 523.1226, 1.307303  
54710, 21586, 523.0607, 1.307148  
54711, 21982, 523.0088, 1.306994  
54712, 22092, 522.9368, 1.306839  
54713, 21894, 522.8749, 1.306684  
54714, 21568, 522.8130, 1.306529  
54715, 21376, 522.7510, 1.306375  
54716, 21402, 522.6891, 1.306220  
54717, 21442, 522.6272, 1.306065  
54718, 21202, 522.5653, 1.305910  
54719, 20648, 522.5033, 1.305756  
54720, 20082, 522.4414, 1.305601  
54721, 19904, 522.3795, 1.305446  
54722, 20188, 522.3176, 1.305291  
54723, 20632, 522.2556, 1.305137  
54724, 20832, 522.1937, 1.304982  
54725, 20686, 522.1318, 1.304827  
54726, 20434, 522.0698, 1.304672  
54727, 20386, 522.0079, 1.304518  
54728, 20614, 521.9460, 1.304363  
54729, 20946, 521.8841, 1.304208  
54730, 21216, 521.8221, 1.304053  
54731, 21462, 521.7602, 1.303899  
54732, 21788, 521.6983, 1.303744  
54733, 22172, 521.6364, 1.303589  
54734, 22394, 521.5744, 1.303434  
54735, 22296, 521.5125, 1.303280  
54736, 22000, 521.4506, 1.303125  
54737, 21832, 521.3887, 1.302970  
54738, 22000, 521.3267, 1.302815  
54739, 22368, 521.2648, 1.302660  
54740, 22578, 521.2029, 1.302506  
54741, 22404, 521.1409, 1.302351  
54742, 21930, 521.0790, 1.302196  
54743, 21368, 521.0171, 1.302041  
54744, 20812, 520.9552, 1.301887  
54745, 20170, 520.8932, 1.301732  
54746, 19394, 520.8313, 1.301577  
54747, 18674, 520.7694, 1.301422  
54748, 18316, 520.7075, 1.301268  
54749, 18430, 520.6455, 1.301113  
54750, 18758, 520.5836, 1.300958  
54751, 18920, 520.5217, 1.300803  
54752, 18768, 520.4597, 1.300649  
54753, 18522, 520.3978, 1.300494  
54754, 18494, 520.3359, 1.300339

54755, 18712, 520.2740, 1.300184  
54756, 18858, 520.2120, 1.300030  
54757, 18652, 520.1501, 1.299875  
54758, 18170, 520.0882, 1.299720  
54759, 17808, 520.0263, 1.299565  
54760, 17850, 519.9643, 1.299411  
54761, 18202, 519.9024, 1.299256  
54762, 18458, 519.8405, 1.299101  
54763, 18356, 519.7786, 1.298946  
54764, 18046, 519.7166, 1.298792  
54765, 17962, 519.6547, 1.298637  
54766, 18402, 519.5928, 1.298482  
54767, 19286, 519.5308, 1.298327  
54768, 20196, 519.4689, 1.298173  
54769, 20714, 519.4070, 1.298018  
54770, 20666, 519.3451, 1.297863  
54771, 20128, 519.2831, 1.297708  
54772, 19310, 519.2212, 1.297553  
54773, 18480, 519.1593, 1.297399  
54774, 17880, 519.0974, 1.297244  
54775, 17668, 519.0354, 1.297089  
54776, 17838, 518.9735, 1.296934  
54777, 18202, 518.9116, 1.296780  
54778, 18518, 518.8496, 1.296625  
54779, 18694, 518.7877, 1.296470  
54780, 18792, 518.7258, 1.296315  
54781, 18920, 518.6639, 1.296161  
54782, 19068, 518.6019, 1.296006  
54783, 19122, 518.5400, 1.295851  
54784, 19034, 518.4781, 1.295696  
54785, 18950, 518.4162, 1.295542  
54786, 19114, 518.3542, 1.295387  
54787, 19628, 518.2923, 1.295232  
54788, 20298, 518.2304, 1.295077  
54789, 20774, 518.1685, 1.294923  
54790, 20800, 518.1065, 1.294768  
54791, 20436, 518.0446, 1.294613  
54792, 19946, 517.9827, 1.294458  
54793, 19628, 517.9207, 1.294304  
54794, 19568, 517.8588, 1.294149  
54795, 19664, 517.7969, 1.293994  
54796, 19720, 517.7350, 1.293839  
54797, 19650, 517.6730, 1.293685  
54798, 19540, 517.6111, 1.293530  
54799, 19634, 517.5492, 1.293375  
54800, 20182, 517.4873, 1.293220  
54801, 21208, 517.4253, 1.293065  
54802, 22404, 517.3634, 1.292911  
54803, 23252, 517.3015, 1.292756  
54804, 23394, 517.2396, 1.292601  
54805, 22928, 517.1776, 1.292446  
54806, 22360, 517.1157, 1.292292  
54807, 22174, 517.0538, 1.292137  
54808, 22358, 516.9918, 1.291982  
54809, 22442, 516.9299, 1.291827  
54810, 21940, 516.8680, 1.291673  
54811, 20846, 516.8061, 1.291518  
54812, 19692, 516.7441, 1.291363  
54813, 19078, 516.6822, 1.291208  
54814, 19166, 516.6203, 1.291054  
54815, 19634, 516.5584, 1.290899  
54816, 20074, 516.4964, 1.290744  
54817, 20394, 516.4345, 1.290589  
54818, 20762, 516.3726, 1.290435  
54819, 21246, 516.3106, 1.290280  
54820, 21558, 516.2487, 1.290125  
54821, 21300, 516.1868, 1.289970  
54822, 20400, 516.1249, 1.289816  
54823, 19284, 516.0629, 1.289661  
54824, 18548, 516.0010, 1.289506  
54825, 18466, 515.9391, 1.289351  
54826, 18804, 515.8772, 1.289197  
54827, 19154, 515.8152, 1.289042  
54828, 19304, 515.7533, 1.288887  
54829, 19346, 515.6914, 1.288732  
54830, 19390, 515.6295, 1.288578

54831, 19376, 515.5675, 1.288423  
54832, 19162, 515.5056, 1.288268  
54833, 18792, 515.4437, 1.288113  
54834, 18560, 515.3817, 1.287958  
54835, 18714, 515.3198, 1.287804  
54836, 19152, 515.2579, 1.287649  
54837, 19488, 515.1960, 1.287494  
54838, 19422, 515.1340, 1.287339  
54839, 19090, 515.0721, 1.287185  
54840, 18884, 515.0102, 1.287030  
54841, 19044, 514.9483, 1.286875  
54842, 19354, 514.8863, 1.286720  
54843, 19390, 514.8244, 1.286566  
54844, 18984, 514.7625, 1.286411  
54845, 18416, 514.7005, 1.286256  
54846, 18128, 514.6386, 1.286101  
54847, 18250, 514.5767, 1.285947  
54848, 18514, 514.5148, 1.285792  
54849, 18580, 514.4528, 1.285637  
54850, 18410, 514.3909, 1.285482  
54851, 18322, 514.3290, 1.285328  
54852, 18580, 514.2671, 1.285173  
54853, 19100, 514.2051, 1.285018  
54854, 19474, 514.1432, 1.284863  
54855, 19382, 514.0813, 1.284709  
54856, 18870, 514.0194, 1.284554  
54857, 18266, 513.9574, 1.284399  
54858, 17894, 513.8955, 1.284244  
54859, 17864, 513.8336, 1.284090  
54860, 18156, 513.7716, 1.283935  
54861, 18716, 513.7097, 1.283780  
54862, 19494, 513.6478, 1.283625  
54863, 20350, 513.5859, 1.283471  
54864, 21006, 513.5239, 1.283316  
54865, 21242, 513.4620, 1.283161  
54866, 21096, 513.4001, 1.283006  
54867, 20838, 513.3382, 1.282851  
54868, 20726, 513.2762, 1.282697  
54869, 20798, 513.2143, 1.282542  
54870, 20872, 513.1524, 1.282387  
54871, 20818, 513.0904, 1.282232  
54872, 20718, 513.0285, 1.282078  
54873, 20822, 512.9666, 1.281923  
54874, 21294, 512.9047, 1.281768  
54875, 22078, 512.8427, 1.281613  
54876, 22964, 512.7808, 1.281459  
54877, 23760, 512.7189, 1.281304  
54878, 24374, 512.6570, 1.281149  
54879, 24788, 512.5950, 1.280994  
54880, 24976, 512.5331, 1.280840  
54881, 24964, 512.4712, 1.280685  
54882, 24848, 512.4093, 1.280530  
54883, 24764, 512.3473, 1.280375  
54884, 24758, 512.2854, 1.280221  
54885, 24750, 512.2235, 1.280066  
54886, 24644, 512.1615, 1.279911  
54887, 24548, 512.0996, 1.279756  
54888, 24712, 512.0377, 1.279602  
54889, 25310, 511.9758, 1.279447  
54890, 26194, 511.9138, 1.279292  
54891, 26950, 511.8519, 1.279137  
54892, 27210, 511.7900, 1.278983  
54893, 26940, 511.7281, 1.278828  
54894, 26406, 511.6661, 1.278673  
54895, 25854, 511.6042, 1.278518  
54896, 25300, 511.5423, 1.278364  
54897, 24620, 511.4803, 1.278209  
54898, 23822, 511.4184, 1.278054  
54899, 23182, 511.3565, 1.277899  
54900, 22992, 511.2946, 1.277744  
54901, 23258, 511.2326, 1.277590  
54902, 23626, 511.1707, 1.277435  
54903, 23712, 511.1088, 1.277280  
54904, 23430, 511.0469, 1.277125  
54905, 23038, 510.9849, 1.276971  
54906, 22836, 510.9230, 1.276816

54907, 22844, 510.8611, 1.276661  
54908, 22808, 510.7992, 1.276506  
54909, 22502, 510.7372, 1.276352  
54910, 21966, 510.6753, 1.276197  
54911, 21490, 510.6134, 1.276042  
54912, 21316, 510.5514, 1.275887  
54913, 21438, 510.4895, 1.275733  
54914, 21646, 510.4276, 1.275578  
54915, 21732, 510.3657, 1.275423  
54916, 21660, 510.3037, 1.275268  
54917, 21534, 510.2418, 1.275114  
54918, 21480, 510.1799, 1.274959  
54919, 21536, 510.1180, 1.274804  
54920, 21640, 510.0560, 1.274649  
54921, 21654, 509.9941, 1.274495  
54922, 21428, 509.9322, 1.274340  
54923, 20882, 509.8702, 1.274185  
54924, 20134, 509.8083, 1.274030  
54925, 19476, 509.7464, 1.273876  
54926, 19220, 509.6845, 1.273721  
54927, 19444, 509.6225, 1.273566  
54928, 19898, 509.5606, 1.273411  
54929, 20210, 509.4987, 1.273257  
54930, 20192, 509.4368, 1.273102  
54931, 20024, 509.3748, 1.272947  
54932, 20056, 509.3129, 1.272792  
54933, 20484, 509.2510, 1.272637  
54934, 21154, 509.1891, 1.272483  
54935, 21724, 509.1271, 1.272328  
54936, 21960, 509.0652, 1.272173  
54937, 21886, 509.0033, 1.272018  
54938, 21684, 508.9413, 1.271864  
54939, 21504, 508.8794, 1.271709  
54940, 21394, 508.8175, 1.271554  
54941, 21360, 508.7556, 1.271399  
54942, 21444, 508.6936, 1.271245  
54943, 21652, 508.6317, 1.271090  
54944, 21888, 508.5698, 1.270935  
54945, 21998, 508.5079, 1.270780  
54946, 21908, 508.4459, 1.270626  
54947, 21760, 508.3840, 1.270471  
54948, 21724, 508.3221, 1.270316  
54949, 21786, 508.2601, 1.270161  
54950, 21688, 508.1982, 1.270007  
54951, 21190, 508.1363, 1.269852  
54952, 20380, 508.0744, 1.269697  
54953, 19696, 508.0124, 1.269542  
54954, 19562, 507.9505, 1.269388  
54955, 20000, 507.8886, 1.269233  
54956, 20556, 507.8267, 1.269078  
54957, 20690, 507.7647, 1.268923  
54958, 20218, 507.7028, 1.268769  
54959, 19448, 507.6409, 1.268614  
54960, 18878, 507.5790, 1.268459  
54961, 18808, 507.5170, 1.268304  
54962, 19250, 507.4551, 1.268150  
54963, 20036, 507.3932, 1.267995  
54964, 21010, 507.3312, 1.267840  
54965, 22030, 507.2693, 1.267685  
54966, 22898, 507.2074, 1.267530  
54967, 23364, 507.1455, 1.267376  
54968, 23282, 507.0835, 1.267221  
54969, 22760, 507.0216, 1.267066  
54970, 22084, 506.9597, 1.266911  
54971, 21524, 506.8978, 1.266757  
54972, 21152, 506.8358, 1.266602  
54973, 20918, 506.7739, 1.266447  
54974, 20810, 506.7120, 1.266292  
54975, 20904, 506.6500, 1.266138  
54976, 21254, 506.5881, 1.265983  
54977, 21770, 506.5262, 1.265828  
54978, 22236, 506.4643, 1.265673  
54979, 22494, 506.4023, 1.265519  
54980, 22572, 506.3404, 1.265364  
54981, 22626, 506.2785, 1.265209  
54982, 22816, 506.2166, 1.265054

54983, 23216, 506.1546, 1.264900  
54984, 23842, 506.0927, 1.264745  
54985, 24710, 506.0308, 1.264590  
54986, 25790, 505.9689, 1.264435  
54987, 26900, 505.9069, 1.264281  
54988, 27712, 505.8450, 1.264126  
54989, 27970, 505.7831, 1.263971  
54990, 27694, 505.7211, 1.263816  
54991, 27196, 505.6592, 1.263662  
54992, 26806, 505.5973, 1.263507  
54993, 26650, 505.5354, 1.263352  
54994, 26626, 505.4734, 1.263197  
54995, 26612, 505.4115, 1.263043  
54996, 26662, 505.3496, 1.262888  
54997, 26928, 505.2877, 1.262733  
54998, 27448, 505.2257, 1.262578  
54999, 28006, 505.1638, 1.262423  
55000, 28296, 505.1019, 1.262269  
55001, 28188, 505.0399, 1.262114  
55002, 27854, 504.9780, 1.261959  
55003, 27612, 504.9161, 1.261804  
55004, 27648, 504.8542, 1.261650  
55005, 27872, 504.7922, 1.261495  
55006, 28026, 504.7303, 1.261340  
55007, 27870, 504.6684, 1.261185  
55008, 27304, 504.6065, 1.261031  
55009, 26350, 504.5445, 1.260876  
55010, 25148, 504.4826, 1.260721  
55011, 23918, 504.4207, 1.260566  
55012, 22936, 504.3588, 1.260412  
55013, 22384, 504.2968, 1.260257  
55014, 22254, 504.2349, 1.260102  
55015, 22340, 504.1730, 1.259947  
55016, 22414, 504.1110, 1.259793  
55017, 22398, 504.0491, 1.259638  
55018, 22384, 503.9872, 1.259483  
55019, 22438, 503.9253, 1.259328  
55020, 22506, 503.8633, 1.259174  
55021, 22442, 503.8014, 1.259019  
55022, 22220, 503.7395, 1.258864  
55023, 22020, 503.6776, 1.258709  
55024, 22058, 503.6156, 1.258555  
55025, 22386, 503.5537, 1.258400  
55026, 22788, 503.4918, 1.258245  
55027, 22988, 503.4299, 1.258090  
55028, 22902, 503.3679, 1.257936  
55029, 22678, 503.3060, 1.257781  
55030, 22522, 503.2441, 1.257626  
55031, 22502, 503.1821, 1.257471  
55032, 22548, 503.1202, 1.257316  
55033, 22590, 503.0583, 1.257162  
55034, 22672, 502.9964, 1.257007  
55035, 22866, 502.9344, 1.256852  
55036, 23110, 502.8725, 1.256697  
55037, 23270, 502.8106, 1.256543  
55038, 23252, 502.7487, 1.256388  
55039, 23184, 502.6867, 1.256233  
55040, 23280, 502.6248, 1.256078  
55041, 23610, 502.5629, 1.255924  
55042, 23994, 502.5009, 1.255769  
55043, 24136, 502.4390, 1.255614  
55044, 23966, 502.3771, 1.255459  
55045, 23704, 502.3152, 1.255305  
55046, 23646, 502.2532, 1.255150  
55047, 23858, 502.1913, 1.254995  
55048, 24108, 502.1294, 1.254840  
55049, 24110, 502.0675, 1.254686  
55050, 23792, 502.0055, 1.254531  
55051, 23374, 501.9436, 1.254376  
55052, 23108, 501.8817, 1.254221  
55053, 23048, 501.8198, 1.254067  
55054, 23076, 501.7578, 1.253912  
55055, 23054, 501.6959, 1.253757  
55056, 22968, 501.6340, 1.253602  
55057, 22862, 501.5720, 1.253448  
55058, 22740, 501.5101, 1.253293

55059, 22518, 501.4482, 1.253138  
55060, 22176, 501.3863, 1.252983  
55061, 21828, 501.3243, 1.252829  
55062, 21622, 501.2624, 1.252674  
55063, 21542, 501.2005, 1.252519  
55064, 21382, 501.1386, 1.252364  
55065, 20942, 501.0766, 1.252209  
55066, 20306, 501.0147, 1.252055  
55067, 19866, 500.9528, 1.251900  
55068, 19994, 500.8908, 1.251745  
55069, 20698, 500.8289, 1.251590  
55070, 21540, 500.7670, 1.251436  
55071, 21958, 500.7051, 1.251281  
55072, 21704, 500.6431, 1.251126  
55073, 21040, 500.5812, 1.250971  
55074, 20520, 500.5193, 1.250817  
55075, 20546, 500.4574, 1.250662  
55076, 21104, 500.3954, 1.250507  
55077, 21784, 500.3335, 1.250352  
55078, 22090, 500.2716, 1.250198  
55079, 21766, 500.2097, 1.250043  
55080, 20932, 500.1477, 1.249888  
55081, 19990, 500.0858, 1.249733  
55082, 19360, 500.0239, 1.249579  
55083, 19234, 499.9619, 1.249424  
55084, 19490, 499.9000, 1.249269  
55085, 19822, 499.8381, 1.249114  
55086, 20000, 499.7762, 1.248960  
55087, 20002, 499.7142, 1.248805  
55088, 19982, 499.6523, 1.248650  
55089, 20082, 499.5904, 1.248495  
55090, 20292, 499.5285, 1.248341  
55091, 20490, 499.4665, 1.248186  
55092, 20580, 499.4046, 1.248031  
55093, 20600, 499.3427, 1.247876  
55094, 20668, 499.2807, 1.247721  
55095, 20866, 499.2188, 1.247567  
55096, 21172, 499.1569, 1.247412  
55097, 21520, 499.0950, 1.247257  
55098, 21872, 499.0330, 1.247102  
55099, 22220, 498.9711, 1.246948  
55100, 22534, 498.9092, 1.246793  
55101, 22718, 498.8473, 1.246638  
55102, 22700, 498.7853, 1.246483  
55103, 22476, 498.7234, 1.246329  
55104, 22134, 498.6615, 1.246174  
55105, 21760, 498.5996, 1.246019  
55106, 21392, 498.5376, 1.245864  
55107, 21064, 498.4757, 1.245710  
55108, 20836, 498.4138, 1.245555  
55109, 20776, 498.3518, 1.245400  
55110, 20814, 498.2899, 1.245245  
55111, 20722, 498.2280, 1.245091  
55112, 20296, 498.1661, 1.244936  
55113, 19624, 498.1041, 1.244781  
55114, 19124, 498.0422, 1.244626  
55115, 19270, 497.9803, 1.244472  
55116, 20166, 497.9184, 1.244317  
55117, 21404, 497.8564, 1.244162  
55118, 22358, 497.7945, 1.244007  
55119, 22672, 497.7326, 1.243853  
55120, 22442, 497.6706, 1.243698  
55121, 22026, 497.6087, 1.243543  
55122, 21654, 497.5468, 1.243388  
55123, 21314, 497.4849, 1.243234  
55124, 20938, 497.4229, 1.243079  
55125, 20618, 497.3610, 1.242924  
55126, 20564, 497.2991, 1.242769  
55127, 20856, 497.2372, 1.242614  
55128, 21316, 497.1752, 1.242460  
55129, 21684, 497.1133, 1.242305  
55130, 21950, 497.0514, 1.242150  
55131, 22358, 496.9895, 1.241995  
55132, 23152, 496.9275, 1.241841  
55133, 24176, 496.8656, 1.241686  
55134, 24978, 496.8037, 1.241531

55135, 25180, 496.7417, 1.241376  
55136, 24840, 496.6798, 1.241222  
55137, 24366, 496.6179, 1.241067  
55138, 24092, 496.5560, 1.240912  
55139, 23964, 496.4940, 1.240757  
55140, 23638, 496.4321, 1.240603  
55141, 22940, 496.3702, 1.240448  
55142, 22052, 496.3083, 1.240293  
55143, 21332, 496.2463, 1.240138  
55144, 20964, 496.1844, 1.239984  
55145, 20804, 496.1225, 1.239829  
55146, 20586, 496.0605, 1.239674  
55147, 20236, 495.9986, 1.239519  
55148, 19882, 495.9367, 1.239365  
55149, 19694, 495.8748, 1.239210  
55150, 19656, 495.8128, 1.239055  
55151, 19668, 495.7509, 1.238900  
55152, 19708, 495.6890, 1.238746  
55153, 19886, 495.6271, 1.238591  
55154, 20290, 495.5651, 1.238436  
55155, 20816, 495.5032, 1.238281  
55156, 21240, 495.4413, 1.238127  
55157, 21442, 495.3794, 1.237972  
55158, 21506, 495.3174, 1.237817  
55159, 21582, 495.2555, 1.237662  
55160, 21676, 495.1936, 1.237507  
55161, 21628, 495.1316, 1.237353  
55162, 21350, 495.0697, 1.237198  
55163, 21016, 495.0078, 1.237043  
55164, 20930, 494.9459, 1.236888  
55165, 21214, 494.8839, 1.236734  
55166, 21644, 494.8220, 1.236579  
55167, 21874, 494.7601, 1.236424  
55168, 21762, 494.6982, 1.236269  
55169, 21510, 494.6362, 1.236115  
55170, 21400, 494.5743, 1.235960  
55171, 21476, 494.5124, 1.235805  
55172, 21552, 494.4504, 1.235650  
55173, 21504, 494.3885, 1.235496  
55174, 21476, 494.3266, 1.235341  
55175, 21732, 494.2647, 1.235186  
55176, 22326, 494.2027, 1.235031  
55177, 22972, 494.1408, 1.234877  
55178, 23372, 494.0789, 1.234722  
55179, 23530, 494.0170, 1.234567  
55180, 23756, 493.9550, 1.234412  
55181, 24252, 493.8931, 1.234258  
55182, 24796, 493.8312, 1.234103  
55183, 24894, 493.7693, 1.233948  
55184, 24316, 493.7073, 1.233793  
55185, 23358, 493.6454, 1.233639  
55186, 22578, 493.5835, 1.233484  
55187, 22252, 493.5215, 1.233329  
55188, 22124, 493.4596, 1.233174  
55189, 21768, 493.3977, 1.233020  
55190, 21098, 493.3358, 1.232865  
55191, 20476, 493.2738, 1.232710  
55192, 20292, 493.2119, 1.232555  
55193, 20504, 493.1500, 1.232400  
55194, 20716, 493.0881, 1.232246  
55195, 20628, 493.0261, 1.232091  
55196, 20390, 492.9642, 1.231936  
55197, 20408, 492.9023, 1.231781  
55198, 20814, 492.8403, 1.231627  
55199, 21274, 492.7784, 1.231472  
55200, 21326, 492.7165, 1.231317  
55201, 20920, 492.6546, 1.231162  
55202, 20494, 492.5926, 1.231008  
55203, 20534, 492.5307, 1.230853  
55204, 21068, 492.4688, 1.230698  
55205, 21654, 492.4069, 1.230543  
55206, 21832, 492.3449, 1.230389  
55207, 21534, 492.2830, 1.230234  
55208, 21034, 492.2211, 1.230079  
55209, 20552, 492.1592, 1.229924  
55210, 20068, 492.0972, 1.229770

55211, 19498, 492.0353, 1.229615  
55212, 19004, 491.9734, 1.229460  
55213, 18920, 491.9114, 1.229305  
55214, 19416, 491.8495, 1.229151  
55215, 20226, 491.7876, 1.228996  
55216, 20850, 491.7257, 1.228841  
55217, 21040, 491.6637, 1.228686  
55218, 21004, 491.6018, 1.228532  
55219, 21152, 491.5399, 1.228377  
55220, 21622, 491.4780, 1.228222  
55221, 22150, 491.4160, 1.228067  
55222, 22422, 491.3541, 1.227913  
55223, 22424, 491.2922, 1.227758  
55224, 22428, 491.2303, 1.227603  
55225, 22602, 491.1683, 1.227448  
55226, 22790, 491.1064, 1.227293  
55227, 22728, 491.0445, 1.227139  
55228, 22436, 490.9825, 1.226984  
55229, 22288, 490.9206, 1.226829  
55230, 22620, 490.8587, 1.226674  
55231, 23286, 490.7968, 1.226520  
55232, 23688, 490.7348, 1.226365  
55233, 23340, 490.6729, 1.226210  
55234, 22360, 490.6110, 1.226055  
55235, 21380, 490.5491, 1.225901  
55236, 20978, 490.4871, 1.225746  
55237, 21214, 490.4252, 1.225591  
55238, 21728, 490.3633, 1.225436  
55239, 22162, 490.3013, 1.225282  
55240, 22484, 490.2394, 1.225127  
55241, 22830, 490.1775, 1.224972  
55242, 23224, 490.1156, 1.224817  
55243, 23510, 490.0536, 1.224663  
55244, 23592, 489.9917, 1.224508  
55245, 23612, 489.9298, 1.224353  
55246, 23774, 489.8679, 1.224198  
55247, 24068, 489.8059, 1.224044  
55248, 24210, 489.7440, 1.223889  
55249, 23962, 489.6821, 1.223734  
55250, 23490, 489.6202, 1.223579  
55251, 23236, 489.5582, 1.223425  
55252, 23474, 489.4963, 1.223270  
55253, 23964, 489.4344, 1.223115  
55254, 24162, 489.3724, 1.222960  
55255, 23750, 489.3105, 1.222806  
55256, 22984, 489.2486, 1.222651  
55257, 22386, 489.1867, 1.222496  
55258, 22194, 489.1247, 1.222341  
55259, 22144, 489.0628, 1.222186  
55260, 21808, 489.0009, 1.222032  
55261, 21118, 488.9390, 1.221877  
55262, 20460, 488.8770, 1.221722  
55263, 20260, 488.8151, 1.221567  
55264, 20546, 488.7532, 1.221413  
55265, 20932, 488.6912, 1.221258  
55266, 21076, 488.6293, 1.221103  
55267, 21030, 488.5674, 1.220948  
55268, 21146, 488.5055, 1.220794  
55269, 21644, 488.4435, 1.220639  
55270, 22376, 488.3816, 1.220484  
55271, 22976, 488.3197, 1.220329  
55272, 23224, 488.2578, 1.220175  
55273, 23198, 488.1958, 1.220020  
55274, 23088, 488.1339, 1.219865  
55275, 22982, 488.0720, 1.219710  
55276, 22834, 488.0101, 1.219556  
55277, 22642, 487.9481, 1.219401  
55278, 22506, 487.8862, 1.219246  
55279, 22520, 487.8243, 1.219091  
55280, 22612, 487.7623, 1.218937  
55281, 22632, 487.7004, 1.218782  
55282, 22536, 487.6385, 1.218627  
55283, 22496, 487.5766, 1.218472  
55284, 22708, 487.5146, 1.218318  
55285, 23116, 487.4527, 1.218163  
55286, 23414, 487.3908, 1.218008

55287, 23326, 487.3289, 1.217853  
55288, 22932, 487.2669, 1.217699  
55289, 22608, 487.2050, 1.217544  
55290, 22638, 487.1431, 1.217389  
55291, 22928, 487.0811, 1.217234  
55292, 23148, 487.0192, 1.217079  
55293, 23118, 486.9573, 1.216925  
55294, 22990, 486.8954, 1.216770  
55295, 23074, 486.8334, 1.216615  
55296, 23452, 486.7715, 1.216460  
55297, 23868, 486.7096, 1.216306  
55298, 24032, 486.6477, 1.216151  
55299, 23922, 486.5857, 1.215996  
55300, 23802, 486.5238, 1.215841  
55301, 23872, 486.4619, 1.215687  
55302, 24026, 486.4000, 1.215532  
55303, 23968, 486.3380, 1.215377  
55304, 23590, 486.2761, 1.215222  
55305, 23144, 486.2142, 1.215068  
55306, 22980, 486.1522, 1.214913  
55307, 23212, 486.0903, 1.214758  
55308, 23604, 486.0284, 1.214603  
55309, 23858, 485.9665, 1.214449  
55310, 23920, 485.9045, 1.214294  
55311, 24000, 485.8426, 1.214139  
55312, 24280, 485.7807, 1.213984  
55313, 24678, 485.7188, 1.213830  
55314, 24946, 485.6568, 1.213675  
55315, 24962, 485.5949, 1.213520  
55316, 24794, 485.5330, 1.213365  
55317, 24600, 485.4710, 1.213211  
55318, 24368, 485.4091, 1.213056  
55319, 23984, 485.3472, 1.212901  
55320, 23430, 485.2853, 1.212746  
55321, 22924, 485.2233, 1.212592  
55322, 22766, 485.1614, 1.212437  
55323, 23020, 485.0995, 1.212282  
55324, 23492, 485.0376, 1.212127  
55325, 23800, 484.9756, 1.211972  
55326, 23854, 484.9137, 1.211818  
55327, 23784, 484.8518, 1.211663  
55328, 23752, 484.7899, 1.211508  
55329, 23722, 484.7279, 1.211353  
55330, 23552, 484.6660, 1.211199  
55331, 23216, 484.6041, 1.211044  
55332, 22904, 484.5421, 1.210889  
55333, 22812, 484.4802, 1.210734  
55334, 22908, 484.4183, 1.210580  
55335, 22916, 484.3564, 1.210425  
55336, 22658, 484.2944, 1.210270  
55337, 22312, 484.2325, 1.210115  
55338, 22292, 484.1706, 1.209961  
55339, 22834, 484.1087, 1.209806  
55340, 23714, 484.0467, 1.209651  
55341, 24404, 483.9848, 1.209496  
55342, 24528, 483.9229, 1.209342  
55343, 24154, 483.8609, 1.209187  
55344, 23696, 483.7990, 1.209032  
55345, 23524, 483.7371, 1.208877  
55346, 23688, 483.6752, 1.208723  
55347, 23994, 483.6132, 1.208568  
55348, 24214, 483.5513, 1.208413  
55349, 24234, 483.4894, 1.208258  
55350, 24026, 483.4275, 1.208104  
55351, 23612, 483.3655, 1.207949  
55352, 23072, 483.3036, 1.207794  
55353, 22558, 483.2417, 1.207639  
55354, 22248, 483.1798, 1.207484  
55355, 22158, 483.1178, 1.207330  
55356, 22108, 483.0559, 1.207175  
55357, 21882, 482.9940, 1.207020  
55358, 21434, 482.9320, 1.206865  
55359, 20936, 482.8701, 1.206711  
55360, 20620, 482.8082, 1.206556  
55361, 20552, 482.7463, 1.206401  
55362, 20630, 482.6843, 1.206246



55363, 20744, 482.6224, 1.206092  
55364, 20902, 482.5605, 1.205937  
55365, 21150, 482.4986, 1.205782  
55366, 21406, 482.4366, 1.205627  
55367, 21490, 482.3747, 1.205473  
55368, 21314, 482.3128, 1.205318  
55369, 21054, 482.2508, 1.205163  
55370, 21026, 482.1889, 1.205008  
55371, 21364, 482.1270, 1.204854  
55372, 21800, 482.0651, 1.204699  
55373, 21910, 482.0031, 1.204544  
55374, 21508, 481.9412, 1.204389  
55375, 20852, 481.8793, 1.204235  
55376, 20396, 481.8174, 1.204080  
55377, 20366, 481.7554, 1.203925  
55378, 20560, 481.6935, 1.203770  
55379, 20620, 481.6316, 1.203616  
55380, 20382, 481.5697, 1.203461  
55381, 20026, 481.5077, 1.203306  
55382, 19818, 481.4458, 1.203151  
55383, 19836, 481.3839, 1.202997  
55384, 19954, 481.3219, 1.202842  
55385, 20058, 481.2600, 1.202687  
55386, 20222, 481.1981, 1.202532  
55387, 20614, 481.1362, 1.202377  
55388, 21262, 481.0742, 1.202223  
55389, 21992, 481.0123, 1.202068  
55390, 22592, 480.9504, 1.201913  
55391, 23010, 480.8885, 1.201758  
55392, 23346, 480.8265, 1.201604  
55393, 23668, 480.7646, 1.201449  
55394, 23906, 480.7027, 1.201294  
55395, 23928, 480.6407, 1.201139  
55396, 23738, 480.5788, 1.200985  
55397, 23504, 480.5169, 1.200830  
55398, 23396, 480.4550, 1.200675  
55399, 23418, 480.3930, 1.200520  
55400, 23430, 480.3311, 1.200366  
55401, 23326, 480.2692, 1.200211  
55402, 23134, 480.2073, 1.200056  
55403, 22924, 480.1453, 1.199901  
55404, 22712, 480.0834, 1.199747  
55405, 22460, 480.0215, 1.199592  
55406, 22258, 479.9596, 1.199437  
55407, 22354, 479.8976, 1.199282  
55408, 22900, 479.8357, 1.199128  
55409, 23704, 479.7738, 1.198973  
55410, 24262, 479.7118, 1.198818  
55411, 24174, 479.6499, 1.198663  
55412, 23554, 479.5880, 1.198509  
55413, 22940, 479.5261, 1.198354  
55414, 22790, 479.4641, 1.198199  
55415, 23048, 479.4022, 1.198044  
55416, 23246, 479.3403, 1.197890  
55417, 23070, 479.2784, 1.197735  
55418, 22756, 479.2164, 1.197580  
55419, 22868, 479.1545, 1.197425  
55420, 23682, 479.0926, 1.197270  
55421, 24818, 479.0306, 1.197116  
55422, 25572, 478.9687, 1.196961  
55423, 25534, 478.9068, 1.196806  
55424, 24918, 478.8449, 1.196651  
55425, 24248, 478.7829, 1.196497  
55426, 23824, 478.7210, 1.196342  
55427, 23500, 478.6591, 1.196187  
55428, 23026, 478.5972, 1.196032  
55429, 22408, 478.5352, 1.195878  
55430, 21930, 478.4733, 1.195723  
55431, 21816, 478.4114, 1.195568  
55432, 21956, 478.3495, 1.195413  
55433, 22060, 478.2875, 1.195259  
55434, 22016, 478.2256, 1.195104  
55435, 22018, 478.1637, 1.194949  
55436, 22292, 478.1017, 1.194794  
55437, 22786, 478.0398, 1.194640  
55438, 23162, 477.9779, 1.194485  
55439, 23160, 477.9160, 1.194330  
55440, 22846, 477.8540, 1.194175  
55441, 22474, 477.7921, 1.194021  
55442, 22154, 477.7302, 1.193866  
55443, 21716, 477.6683, 1.193711  
55444, 21002, 477.6063, 1.193556  
55445, 20206, 477.5444, 1.193402  
55446, 19828, 477.4825, 1.193247  
55447, 20150, 477.4206, 1.193092  
55448, 20870, 477.3586, 1.192937  
55449, 21276, 477.2967, 1.192783  
55450, 20926, 477.2348, 1.192628  
55451, 20094, 477.1728, 1.192473  
55452, 19584, 477.1109, 1.192318  
55453, 19976, 477.0490, 1.192163  
55454, 21114, 476.9871, 1.192009  
55455, 22250, 476.9251, 1.191854  
55456, 22704, 476.8632, 1.191699  
55457, 22358, 476.8013, 1.191544  
55458, 21658, 476.7394, 1.191390  
55459, 21128, 476.6774, 1.191235  
55460, 21026, 476.6155, 1.191080  
55461, 21292, 476.5536, 1.190925  
55462, 21756, 476.4916, 1.190771  
55463, 22262, 476.4297, 1.190616  
55464, 22696, 476.3678, 1.190461  
55465, 22962, 476.3059, 1.190306  
55466, 23056, 476.2439, 1.190152  
55467, 23096, 476.1820, 1.189997  
55468, 23224, 476.1201, 1.189842  
55469, 23490, 476.0582, 1.189687  
55470, 23758, 475.9962, 1.189533  
55471, 23878, 475.9343, 1.189378  
55472, 23842, 475.8724, 1.189223  
55473, 23796, 475.8105, 1.189068  
55474, 23832, 475.7485, 1.188914  
55475, 23842, 475.6866, 1.188759  
55476, 23598, 475.6247, 1.188604  
55477, 23016, 475.5627, 1.188449  
55478, 22292, 475.5008, 1.188295  
55479, 21712, 475.4389, 1.188140  
55480, 21396, 475.3770, 1.187985  
55481, 21208, 475.3150, 1.187830  
55482, 20964, 475.2531, 1.187676  
55483, 20662, 475.1912, 1.187521  
55484, 20476, 475.1293, 1.187366  
55485, 20506, 475.0673, 1.187211  
55486, 20634, 475.0054, 1.187056  
55487, 20630, 474.9435, 1.186902  
55488, 20452, 474.8815, 1.186747  
55489, 20342, 474.8196, 1.186592  
55490, 20572, 474.7577, 1.186437  
55491, 21136, 474.6958, 1.186283  
55492, 21730, 474.6338, 1.186128  
55493, 22042, 474.5719, 1.185973  
55494, 22068, 474.5100, 1.185818  
55495, 22058, 474.4481, 1.185664  
55496, 22216, 474.3861, 1.185509  
55497, 22448, 474.3242, 1.185354  
55498, 22494, 474.2623, 1.185199  
55499, 22246, 474.2004, 1.185045  
55500, 21858, 474.1384, 1.184890  
55501, 21568, 474.0765, 1.184735  
55502, 21378, 474.0146, 1.184580  
55503, 21054, 473.9526, 1.184426  
55504, 20422, 473.8907, 1.184271  
55505, 19624, 473.8288, 1.184116  
55506, 19068, 473.7669, 1.183961  
55507, 19028, 473.7049, 1.183807  
55508, 19392, 473.6430, 1.183652  
55509, 19806, 473.5811, 1.183497  
55510, 20034, 473.5192, 1.183342  
55511, 20150, 473.4572, 1.183188  
55512, 20400, 473.3953, 1.183033  
55513, 20866, 473.3334, 1.182878  
55514, 21362, 473.2714, 1.182723  
55515, 21614, 473.2095, 1.182569  
55516, 21556, 473.1476, 1.182414  
55517, 21360, 473.0857, 1.182259  
55518, 21218, 473.0237, 1.182104  
55519, 21182, 472.9618, 1.181949  
55520, 21132, 472.8999, 1.181795  
55521, 20992, 472.8380, 1.181640  
55522, 20820, 472.7760, 1.181485  
55523, 20762, 472.7141, 1.181330  
55524, 20916, 472.6522, 1.181176  
55525, 21266, 472.5903, 1.181021  
55526, 21746, 472.5283, 1.180866  
55527, 22242, 472.4664, 1.180711  
55528, 22592, 472.4045, 1.180557  
55529, 22584, 472.3425, 1.180402  
55530, 22070, 472.2806, 1.180247  
55531, 21162, 472.2187, 1.180092  
55532, 20248, 472.1568, 1.179938  
55533, 19738, 472.0948, 1.179783  
55534, 19808, 472.0329, 1.179628  
55535, 20266, 471.9710, 1.179473  
55536, 20786, 471.9091, 1.179319  
55537, 21190, 471.8471, 1.179164  
55538, 21564, 471.7852, 1.179009  
55539, 22040, 471.7233, 1.178854  
55540, 22588, 471.6613, 1.178700  
55541, 22996, 471.5994, 1.178545  
55542, 23064, 471.5375, 1.178390  
55543, 22816, 471.4756, 1.178235  
55544, 22422, 471.4136, 1.178081  
55545, 22026, 471.3517, 1.177926  
55546, 21648, 471.2898, 1.177771  
55547, 21270, 471.2279, 1.177616  
55548, 20988, 471.1659, 1.177462  
55549, 20996, 471.1040, 1.177307  
55550, 21400, 471.0421, 1.177152  
55551, 22068, 470.9802, 1.176997  
55552, 22730, 470.9182, 1.176842  
55553, 23198, 470.8563, 1.176688  
55554, 23504, 470.7944, 1.176533  
55555, 23788, 470.7324, 1.176378  
55556, 24096, 470.6705, 1.176223  
55557, 24292, 470.6086, 1.176069  
55558, 24180, 470.5467, 1.175914  
55559, 23698, 470.4847, 1.175759  
55560, 22982, 470.4228, 1.175604  
55561, 22290, 470.3609, 1.175450  
55562, 21860, 470.2990, 1.175295  
55563, 21852, 470.2370, 1.175140  
55564, 22318, 470.1751, 1.174985  
55565, 23146, 470.1132, 1.174831  
55566, 24044, 470.0512, 1.174676  
55567, 24626, 469.9893, 1.174521  
55568, 24660, 469.9274, 1.174366  
55569, 24214, 469.8655, 1.174212  
55570, 23604, 469.8035, 1.174057  
55571, 23066, 469.7416, 1.173902  
55572, 22570, 469.6797, 1.173747  
55573, 21890, 469.6178, 1.173593  
55574, 20950, 469.5558, 1.173438  
55575, 20014, 469.4939, 1.173283  
55576, 19490, 469.4320, 1.173128  
55577, 19574, 469.3701, 1.172974  
55578, 20038, 469.3081, 1.172819  
55579, 20458, 469.2462, 1.172664  
55580, 20610, 469.1843, 1.172509  
55581, 20650, 469.1223, 1.172355  
55582, 20898, 469.0604, 1.172200  
55583, 21474, 468.9985, 1.172045  
55584, 22168, 468.9366, 1.171890  
55585, 22668, 468.8746, 1.171735  
55586, 22842, 468.8127, 1.171581  
55587, 22820, 468.7508, 1.171426  
55588, 22816, 468.6889, 1.171271  
55589, 22926, 468.6269, 1.171116  
55590, 23118, 468.5650, 1.170962

55591, 23372, 468.5031, 1.170807  
55592, 23716, 468.4411, 1.170652  
55593, 24132, 468.3792, 1.170497  
55594, 24446, 468.3173, 1.170343  
55595, 24448, 468.2554, 1.170188  
55596, 24072, 468.1934, 1.170033  
55597, 23526, 468.1315, 1.169878  
55598, 23096, 468.0696, 1.169724  
55599, 22912, 468.0077, 1.169569  
55600, 22840, 467.9457, 1.169414  
55601, 22684, 467.8838, 1.169259  
55602, 22422, 467.8219, 1.169105  
55603, 22208, 467.7600, 1.168950  
55604, 22208, 467.6980, 1.168795  
55605, 22372, 467.6361, 1.168640  
55606, 22502, 467.5742, 1.168486  
55607, 22482, 467.5122, 1.168331  
55608, 22400, 467.4503, 1.168176  
55609, 22446, 467.3884, 1.168021  
55610, 22700, 467.3265, 1.167867  
55611, 23004, 467.2645, 1.167712  
55612, 23134, 467.2026, 1.167557  
55613, 22968, 467.1407, 1.167402  
55614, 22568, 467.0788, 1.167248  
55615, 22082, 467.0168, 1.167093  
55616, 21654, 466.9549, 1.166938  
55617, 21396, 466.8930, 1.166783  
55618, 21432, 466.8310, 1.166628  
55619, 21806, 466.7691, 1.166474  
55620, 22412, 466.7072, 1.166319  
55621, 22980, 466.6453, 1.166164  
55622, 23270, 466.5833, 1.166009  
55623, 23300, 466.5214, 1.165855  
55624, 23330, 466.4595, 1.165700  
55625, 23612, 466.3976, 1.165545  
55626, 24090, 466.3356, 1.165390  
55627, 24438, 466.2737, 1.165236  
55628, 24372, 466.2118, 1.165081  
55629, 23942, 466.1499, 1.164926  
55630, 23490, 466.0879, 1.164771  
55631, 23302, 466.0260, 1.164617  
55632, 23354, 465.9641, 1.164462  
55633, 23356, 465.9021, 1.164307  
55634, 23068, 465.8402, 1.164152  
55635, 22526, 465.7783, 1.163998  
55636, 21952, 465.7164, 1.163843  
55637, 21540, 465.6544, 1.163688  
55638, 21338, 465.5925, 1.163533  
55639, 21338, 465.5306, 1.163379  
55640, 21594, 465.4687, 1.163224  
55641, 22144, 465.4067, 1.163069  
55642, 22818, 465.3448, 1.162914  
55643, 23230, 465.2829, 1.162760  
55644, 23038, 465.2209, 1.162605  
55645, 22262, 465.1590, 1.162450  
55646, 21352, 465.0971, 1.162295  
55647, 20854, 465.0352, 1.162140  
55648, 21014, 464.9732, 1.161986  
55649, 21638, 464.9113, 1.161831  
55650, 22340, 464.8494, 1.161676  
55651, 22870, 464.7875, 1.161521  
55652, 23208, 464.7255, 1.161367  
55653, 23424, 464.6636, 1.161212  
55654, 23524, 464.6017, 1.161057  
55655, 23456, 464.5398, 1.160902  
55656, 23252, 464.4778, 1.160748  
55657, 23058, 464.4159, 1.160593  
55658, 23006, 464.3540, 1.160438  
55659, 23090, 464.2920, 1.160283  
55660, 23158, 464.2301, 1.160129  
55661, 23082, 464.1682, 1.159974  
55662, 22870, 464.1063, 1.159819  
55663, 22604, 464.0443, 1.159664  
55664, 22320, 463.9824, 1.159510  
55665, 21970, 463.9205, 1.159355  
55666, 21520, 463.8586, 1.159200  
55667, 21054, 463.7966, 1.159045  
55668, 20712, 463.7347, 1.158891  
55669, 20556, 463.6728, 1.158736  
55670, 20526, 463.6109, 1.158581  
55671, 20524, 463.5489, 1.158426  
55672, 20570, 463.4870, 1.158272  
55673, 20788, 463.4251, 1.158117  
55674, 21252, 463.3631, 1.157962  
55675, 21898, 463.3012, 1.157807  
55676, 22604, 463.2393, 1.157653  
55677, 23348, 463.1774, 1.157498  
55678, 24210, 463.1154, 1.157343  
55679, 25190, 463.0535, 1.157188  
55680, 26044, 462.9916, 1.157033  
55681, 26354, 462.9297, 1.156879  
55682, 25894, 462.8677, 1.156724  
55683, 24876, 462.8058, 1.156569  
55684, 23814, 462.7439, 1.156414  
55685, 23122, 462.6819, 1.156260  
55686, 22942, 462.6200, 1.156105  
55687, 22538, 462.5581, 1.155950  
55688, 22076, 462.4962, 1.155795  
55689, 21464, 462.4342, 1.155641  
55690, 20942, 462.3723, 1.155486  
55691, 20676, 462.3104, 1.155331  
55692, 20610, 462.2485, 1.155176  
55693, 20618, 462.1865, 1.155022  
55694, 20716, 462.1246, 1.154867  
55695, 21024, 462.0627, 1.154712  
55696, 21572, 462.0008, 1.154557  
55697, 22136, 461.9388, 1.154403  
55698, 22394, 461.8769, 1.154248  
55699, 22216, 461.8150, 1.154093  
55700, 21808, 461.7530, 1.153938  
55701, 21530, 461.6911, 1.153784  
55702, 21570, 461.6292, 1.153629  
55703, 21828, 461.5673, 1.153474  
55704, 22074, 461.5053, 1.153319  
55705, 22180, 461.4434, 1.153165  
55706, 22200, 461.3815, 1.153010  
55707, 22252, 461.3196, 1.152855  
55708, 22386, 461.2576, 1.152700  
55709, 22610, 461.1957, 1.152546  
55710, 22928, 461.1338, 1.152391  
55711, 23346, 461.0718, 1.152236  
55712, 23796, 461.0099, 1.152081  
55713, 24118, 460.9480, 1.151926  
55714, 24160, 460.8861, 1.151772  
55715, 23976, 460.8241, 1.151617  
55716, 23734, 460.7622, 1.151462  
55717, 23534, 460.7003, 1.151307  
55718, 23246, 460.6384, 1.151153  
55719, 22636, 460.5764, 1.150998  
55720, 21690, 460.5145, 1.150843  
55721, 20772, 460.4526, 1.150688  
55722, 20364, 460.3907, 1.150534  
55723, 20648, 460.3287, 1.150379  
55724, 21300, 460.2668, 1.150224  
55725, 21802, 460.2049, 1.150069  
55726, 21918, 460.1429, 1.149915  
55727, 21896, 460.0810, 1.149760  
55728, 22176, 460.0191, 1.149605  
55729, 22912, 459.9572, 1.149450  
55730, 23820, 459.8952, 1.149296  
55731, 24456, 459.8333, 1.149141  
55732, 24606, 459.7714, 1.148986  
55733, 24418, 459.7095, 1.148831  
55734, 24170, 459.6475, 1.148677  
55735, 23968, 459.5856, 1.148522  
55736, 23758, 459.5237, 1.148367  
55737, 23508, 459.4617, 1.148212  
55738, 23332, 459.3998, 1.148058  
55739, 23390, 459.3379, 1.147903  
55740, 23652, 459.2760, 1.147748  
55741, 23886, 459.2140, 1.147593  
55742, 23828, 459.1521, 1.147439  
55743, 23416, 459.0902, 1.147284  
55744, 22818, 459.0283, 1.147129  
55745, 22288, 458.9663, 1.146974  
55746, 21962, 458.9044, 1.146819  
55747, 21864, 458.8425, 1.146665  
55748, 21978, 458.7806, 1.146510  
55749, 22252, 458.7186, 1.146355  
55750, 22578, 458.6567, 1.146200  
55751, 22770, 458.5948, 1.146046  
55752, 22684, 458.5328, 1.145891  
55753, 22336, 458.4709, 1.145736  
55754, 21912, 458.4090, 1.145581  
55755, 21588, 458.3471, 1.145427  
55756, 21412, 458.2851, 1.145272  
55757, 21320, 458.2232, 1.145117  
55758, 21312, 458.1613, 1.144962  
55759, 21504, 458.0994, 1.144808  
55760, 21976, 458.0374, 1.144653  
55761, 22584, 457.9755, 1.144498  
55762, 22992, 457.9136, 1.144343  
55763, 22932, 457.8516, 1.144189  
55764, 22490, 457.7897, 1.144034  
55765, 22046, 457.7278, 1.143879  
55766, 21954, 457.6659, 1.143724  
55767, 22258, 457.6039, 1.143570  
55768, 22702, 457.5420, 1.143415  
55769, 23032, 457.4801, 1.143260  
55770, 23164, 457.4182, 1.143105  
55771, 23156, 457.3562, 1.142951  
55772, 23030, 457.2943, 1.142796  
55773, 22726, 457.2324, 1.142641  
55774, 22236, 457.1705, 1.142486  
55775, 21716, 457.1085, 1.142332  
55776, 21406, 457.0466, 1.142177  
55777, 21360, 456.9847, 1.142022  
55778, 21400, 456.9227, 1.141867  
55779, 21314, 456.8608, 1.141712  
55780, 21140, 456.7989, 1.141558  
55781, 21122, 456.7370, 1.141403  
55782, 21428, 456.6750, 1.141248  
55783, 21878, 456.6131, 1.141093  
55784, 22048, 456.5512, 1.140939  
55785, 21702, 456.4893, 1.140784  
55786, 21062, 456.4273, 1.140629  
55787, 20640, 456.3654, 1.140474  
55788, 20778, 456.3035, 1.140320  
55789, 21358, 456.2415, 1.140165  
55790, 21984, 456.1796, 1.140010  
55791, 22380, 456.1177, 1.139855  
55792, 22596, 456.0558, 1.139701  
55793, 22834, 455.9938, 1.139546  
55794, 23142, 455.9319, 1.139391  
55795, 23368, 455.8700, 1.139236  
55796, 23360, 455.8081, 1.139082  
55797, 23134, 455.7461, 1.138927  
55798, 22804, 455.6842, 1.138772  
55799, 22376, 455.6223, 1.138617  
55800, 21724, 455.5604, 1.138463  
55801, 20820, 455.4984, 1.138308  
55802, 19928, 455.4365, 1.138153  
55803, 19468, 455.3746, 1.137998  
55804, 19620, 455.3126, 1.137844  
55805, 20100, 455.2507, 1.137689  
55806, 20414, 455.1888, 1.137534  
55807, 20292, 455.1269, 1.137379  
55808, 19950, 455.0649, 1.137225  
55809, 19806, 455.0030, 1.137070  
55810, 20004, 454.9411, 1.136915  
55811, 20298, 454.8792, 1.136760  
55812, 20352, 454.8172, 1.136605  
55813, 20154, 454.7553, 1.136451  
55814, 20032, 454.6934, 1.136296  
55815, 20238, 454.6314, 1.136141  
55816, 20610, 454.5695, 1.135986  
55817, 20710, 454.5076, 1.135832  
55818, 20286, 454.4457, 1.135677

55819, 19570, 454.3837, 1.135522  
55820, 19108, 454.3218, 1.135367  
55821, 19242, 454.2599, 1.135213  
55822, 19846, 454.1980, 1.135058  
55823, 20496, 454.1360, 1.134903  
55824, 20880, 454.0741, 1.134748  
55825, 20966, 454.0122, 1.134594  
55826, 20892, 453.9503, 1.134439  
55827, 20714, 453.8883, 1.134284  
55828, 20412, 453.8264, 1.134129  
55829, 20058, 453.7645, 1.133975  
55830, 19866, 453.7025, 1.133820  
55831, 20028, 453.6406, 1.133665  
55832, 20494, 453.5787, 1.133510  
55833, 20982, 453.5168, 1.133356  
55834, 21240, 453.4548, 1.133201  
55835, 21296, 453.3929, 1.133046  
55836, 21394, 453.3310, 1.132891  
55837, 21700, 453.2691, 1.132737  
55838, 22136, 453.2071, 1.132582  
55839, 22494, 453.1452, 1.132427  
55840, 22682, 453.0833, 1.132272  
55841, 22826, 453.0213, 1.132118  
55842, 23072, 452.9594, 1.131963  
55843, 23396, 452.8975, 1.131808  
55844, 23594, 452.8356, 1.131653  
55845, 23516, 452.7736, 1.131498  
55846, 23242, 452.7117, 1.131344  
55847, 23006, 452.6498, 1.131189  
55848, 22950, 452.5879, 1.131034  
55849, 23036, 452.5259, 1.130879  
55850, 23146, 452.4640, 1.130725  
55851, 23278, 452.4021, 1.130570  
55852, 23518, 452.3402, 1.130415  
55853, 23912, 452.2782, 1.130260  
55854, 24364, 452.2163, 1.130106  
55855, 24736, 452.1544, 1.129951  
55856, 25024, 452.0924, 1.129796  
55857, 25356, 452.0305, 1.129641  
55858, 25800, 451.9686, 1.129487  
55859, 26226, 451.9067, 1.129332  
55860, 26414, 451.8447, 1.129177  
55861, 26344, 451.7828, 1.129022  
55862, 26270, 451.7209, 1.128868  
55863, 26482, 451.6590, 1.128713  
55864, 26968, 451.5970, 1.128558  
55865, 27334, 451.5351, 1.128403  
55866, 27172, 451.4732, 1.128249  
55867, 26450, 451.4113, 1.128094  
55868, 25580, 451.3493, 1.127939  
55869, 25018, 451.2874, 1.127784  
55870, 24846, 451.2255, 1.127630  
55871, 24746, 451.1635, 1.127475  
55872, 24348, 451.1016, 1.127320  
55873, 23614, 451.0397, 1.127165  
55874, 22836, 450.9778, 1.127011  
55875, 22308, 450.9158, 1.126856  
55876, 22068, 450.8539, 1.126701  
55877, 21898, 450.7920, 1.126546  
55878, 21584, 450.7301, 1.126391  
55879, 21072, 450.6681, 1.126237  
55880, 20484, 450.6062, 1.126082  
55881, 19986, 450.5443, 1.125927  
55882, 19722, 450.4823, 1.125772  
55883, 19796, 450.4204, 1.125618  
55884, 20226, 450.3585, 1.125463  
55885, 20870, 450.2966, 1.125308  
55886, 21466, 450.2346, 1.125153  
55887, 21840, 450.1727, 1.124999  
55888, 22084, 450.1108, 1.124844  
55889, 22480, 450.0489, 1.124689  
55890, 23178, 449.9869, 1.124534  
55891, 23968, 449.9250, 1.124380  
55892, 24400, 449.8631, 1.124225  
55893, 24236, 449.8012, 1.124070  
55894, 23744, 449.7392, 1.123915

55895, 23480, 449.6773, 1.123761  
55896, 23752, 449.6154, 1.123606  
55897, 24298, 449.5534, 1.123451  
55898, 24580, 449.4915, 1.123296  
55899, 24360, 449.4296, 1.123142  
55900, 23974, 449.3677, 1.122987  
55901, 23974, 449.3057, 1.122832  
55902, 24548, 449.2438, 1.122677  
55903, 25254, 449.1819, 1.122523  
55904, 25458, 449.1200, 1.122368  
55905, 24896, 449.0580, 1.122213  
55906, 23920, 448.9961, 1.122058  
55907, 23064, 448.9342, 1.121904  
55908, 22602, 448.8722, 1.121749  
55909, 22360, 448.8103, 1.121594  
55910, 22052, 448.7483, 1.121439  
55911, 21622, 448.6865, 1.121284  
55912, 21238, 448.6245, 1.121130  
55913, 21050, 448.5626, 1.120975  
55914, 21004, 448.5007, 1.120820  
55915, 20938, 448.4388, 1.120665  
55916, 20780, 448.3768, 1.120511  
55917, 20628, 448.3149, 1.120356  
55918, 20560, 448.2530, 1.120201  
55919, 20566, 448.1911, 1.120046  
55920, 20632, 448.1291, 1.119892  
55921, 20860, 448.0672, 1.119737  
55922, 21446, 448.0053, 1.119582  
55923, 22376, 447.9433, 1.119427  
55924, 23316, 447.8814, 1.119273  
55925, 23806, 447.8195, 1.119118  
55926, 23668, 447.7576, 1.118963  
55927, 23194, 447.6956, 1.118808  
55928, 22864, 447.6337, 1.118654  
55929, 22866, 447.5718, 1.118499  
55930, 22932, 447.5099, 1.118344  
55931, 22686, 447.4479, 1.118189  
55932, 22092, 447.3860, 1.118035  
55933, 21544, 447.3241, 1.117880  
55934, 21454, 447.2621, 1.117725  
55935, 21808, 447.2002, 1.117570  
55936, 22196, 447.1383, 1.117416  
55937, 22218, 447.0764, 1.117261  
55938, 21848, 447.0144, 1.117106  
55939, 21390, 446.9525, 1.116951  
55940, 21074, 446.8906, 1.116796  
55941, 20878, 446.8287, 1.116642  
55942, 20676, 446.7667, 1.116487  
55943, 20540, 446.7048, 1.116332  
55944, 20744, 446.6429, 1.116177  
55945, 21416, 446.5810, 1.116023  
55946, 22290, 446.5190, 1.115868  
55947, 22838, 446.4571, 1.115713  
55948, 22762, 446.3952, 1.115558  
55949, 22270, 446.3332, 1.115404  
55950, 21886, 446.2713, 1.115249  
55951, 21964, 446.2094, 1.115094  
55952, 22402, 446.1475, 1.114939  
55953, 22852, 446.0855, 1.114785  
55954, 23096, 446.0236, 1.114630  
55955, 23206, 445.9617, 1.114475  
55956, 23372, 445.8998, 1.114320  
55957, 23628, 445.8378, 1.114166  
55958, 23854, 445.7759, 1.114011  
55959, 23992, 445.7140, 1.113856  
55960, 24176, 445.6520, 1.113701  
55961, 24570, 445.5901, 1.113547  
55962, 25124, 445.5282, 1.113392  
55963, 25566, 445.4663, 1.113237  
55964, 25650, 445.4043, 1.113082  
55965, 25418, 445.3424, 1.112928  
55966, 25150, 445.2805, 1.112773  
55967, 25044, 445.2186, 1.112618  
55968, 25014, 445.1566, 1.112463  
55969, 24808, 445.0947, 1.112309  
55970, 24320, 445.0328, 1.112154

55971, 23746, 444.9709, 1.111999  
55972, 23436, 444.9089, 1.111844  
55973, 23548, 444.8470, 1.111689  
55974, 23980, 444.7851, 1.111535  
55975, 24492, 444.7231, 1.111380  
55976, 24936, 444.6612, 1.111225  
55977, 25252, 444.5993, 1.111070  
55978, 25394, 444.5374, 1.110916  
55979, 25280, 444.4754, 1.110761  
55980, 24904, 444.4135, 1.110606  
55981, 24452, 444.3516, 1.110451  
55982, 24188, 444.2897, 1.110297  
55983, 24244, 444.2277, 1.110142  
55984, 24476, 444.1658, 1.109987  
55985, 24668, 444.1039, 1.109832  
55986, 24758, 444.0419, 1.109678  
55987, 24882, 443.9800, 1.109523  
55988, 25130, 443.9181, 1.109368  
55989, 25352, 443.8562, 1.109213  
55990, 25236, 443.7942, 1.109059  
55991, 24684, 443.7323, 1.108904  
55992, 24032, 443.6704, 1.108749  
55993, 23782, 443.6085, 1.108594  
55994, 24140, 443.5465, 1.108440  
55995, 24756, 443.4846, 1.108285  
55996, 25032, 443.4227, 1.108130  
55997, 24662, 443.3608, 1.107975  
55998, 23922, 443.2988, 1.107821  
55999, 23376, 443.2369, 1.107666  
56000, 23346, 443.1750, 1.107511  
56001, 23664, 443.1130, 1.107356  
56002, 23930, 443.0511, 1.107202  
56003, 23922, 442.9892, 1.107047  
56004, 23760, 442.9273, 1.106892  
56005, 23708, 442.8653, 1.106737  
56006, 23848, 442.8034, 1.106582  
56007, 24006, 442.7415, 1.106428  
56008, 23954, 442.6796, 1.106273  
56009, 23618, 442.6176, 1.106118  
56010, 23104, 442.5557, 1.105963  
56011, 22558, 442.4938, 1.105809  
56012, 22084, 442.4318, 1.105654  
56013, 21776, 442.3699, 1.105499  
56014, 21750, 442.3080, 1.105344  
56015, 22076, 442.2461, 1.105190  
56016, 22682, 442.1841, 1.105035  
56017, 23362, 442.1222, 1.104880  
56018, 23950, 442.0603, 1.104725  
56019, 24448, 441.9984, 1.104571  
56020, 25002, 441.9364, 1.104416  
56021, 25686, 441.8745, 1.104261  
56022, 26368, 441.8126, 1.104106  
56023, 26766, 441.7507, 1.103952  
56024, 26712, 441.6887, 1.103797  
56025, 26292, 441.6268, 1.103642  
56026, 25776, 441.5649, 1.103487  
56027, 25420, 441.5029, 1.103333  
56028, 25290, 441.4410, 1.103178  
56029, 25280, 441.3791, 1.103023  
56030, 25182, 441.3172, 1.102868  
56031, 24808, 441.2552, 1.102714  
56032, 24096, 441.1933, 1.102559  
56033, 23190, 441.1314, 1.102404  
56034, 22436, 441.0695, 1.102249  
56035, 22198, 441.0075, 1.102095  
56036, 22552, 440.9456, 1.101940  
56037, 23118, 440.8837, 1.101785  
56038, 23294, 440.8217, 1.101630  
56039, 22726, 440.7598, 1.101475  
56040, 21692, 440.6979, 1.101321  
56041, 20898, 440.6360, 1.101166  
56042, 20908, 440.5740, 1.101011  
56043, 21674, 440.5121, 1.100856  
56044, 22592, 440.4502, 1.100702  
56045, 23068, 440.3883, 1.100547  
56046, 22992, 440.3263, 1.100392

56047, 22750, 440.2644, 1.100237  
56048, 22740, 440.2025, 1.100083  
56049, 23002, 440.1406, 1.099928  
56050, 23274, 440.0786, 1.099773  
56051, 23324, 440.0167, 1.099618  
56052, 23242, 439.9548, 1.099464  
56053, 23280, 439.8928, 1.099309  
56054, 23562, 439.8309, 1.099154  
56055, 23928, 439.7690, 1.098999  
56056, 24098, 439.7071, 1.098845  
56057, 23968, 439.6451, 1.098690  
56058, 23678, 439.5832, 1.098535  
56059, 23444, 439.5213, 1.098380  
56060, 23358, 439.4594, 1.098226  
56061, 23374, 439.3974, 1.098071  
56062, 23420, 439.3355, 1.097916  
56063, 23472, 439.2736, 1.097761  
56064, 23538, 439.2116, 1.097607  
56065, 23564, 439.1497, 1.097452  
56066, 23460, 439.0878, 1.097297  
56067, 23214, 439.0259, 1.097142  
56068, 22938, 438.9639, 1.096988  
56069, 22780, 438.9020, 1.096833  
56070, 22814, 438.8401, 1.096678  
56071, 23042, 438.7782, 1.096523  
56072, 23412, 438.7162, 1.096368  
56073, 23900, 438.6543, 1.096214  
56074, 24404, 438.5924, 1.096059  
56075, 24740, 438.5305, 1.095904  
56076, 24752, 438.4685, 1.095749  
56077, 24506, 438.4066, 1.095595  
56078, 24306, 438.3447, 1.095440  
56079, 24476, 438.2827, 1.095285  
56080, 24996, 438.2208, 1.095130  
56081, 25502, 438.1589, 1.094976  
56082, 25630, 438.0970, 1.094821  
56083, 25410, 438.0350, 1.094666  
56084, 25254, 437.9731, 1.094511  
56085, 25522, 437.9112, 1.094357  
56086, 26086, 437.8493, 1.094202  
56087, 26424, 437.7873, 1.094047  
56088, 26146, 437.7254, 1.093892  
56089, 25432, 437.6635, 1.093738  
56090, 24896, 437.6016, 1.093583  
56091, 24982, 437.5396, 1.093428  
56092, 25516, 437.4777, 1.093273  
56093, 25904, 437.4158, 1.093119  
56094, 25718, 437.3538, 1.092964  
56095, 25076, 437.2919, 1.092809  
56096, 24392, 437.2300, 1.092654  
56097, 23918, 437.1681, 1.092500  
56098, 23490, 437.1061, 1.092345  
56099, 22864, 437.0442, 1.092190  
56100, 22112, 436.9823, 1.092035  
56101, 21666, 436.9204, 1.091881  
56102, 21876, 436.8584, 1.091726  
56103, 22604, 436.7965, 1.091571  
56104, 23326, 436.7346, 1.091416  
56105, 23592, 436.6726, 1.091261  
56106, 23402, 436.6107, 1.091107  
56107, 23070, 436.5488, 1.090952  
56108, 22822, 436.4869, 1.090797  
56109, 22596, 436.4249, 1.090642  
56110, 22246, 436.3630, 1.090488  
56111, 21830, 436.3011, 1.090333  
56112, 21624, 436.2392, 1.090178  
56113, 21766, 436.1772, 1.090023  
56114, 22060, 436.1153, 1.089869  
56115, 22138, 436.0534, 1.089714  
56116, 21906, 435.9915, 1.089559  
56117, 21704, 435.9295, 1.089404  
56118, 21990, 435.8676, 1.089250  
56119, 22824, 435.8057, 1.089095  
56120, 23712, 435.7437, 1.088940  
56121, 24052, 435.6818, 1.088785  
56122, 23706, 435.6199, 1.088631  
56123, 23164, 435.5580, 1.088476  
56124, 23090, 435.4960, 1.088321  
56125, 23740, 435.4341, 1.088166  
56126, 24770, 435.3722, 1.088012  
56127, 25586, 435.3103, 1.087857  
56128, 25872, 435.2483, 1.087702  
56129, 25742, 435.1864, 1.087547  
56130, 25532, 435.1245, 1.087393  
56131, 25432, 435.0625, 1.087238  
56132, 25338, 435.0006, 1.087083  
56133, 25020, 434.9387, 1.086928  
56134, 24350, 434.8768, 1.086774  
56135, 23458, 434.8148, 1.086619  
56136, 22690, 434.7529, 1.086464  
56137, 22416, 434.6910, 1.086309  
56138, 22808, 434.6291, 1.086154  
56139, 23686, 434.5671, 1.086000  
56140, 24574, 434.5052, 1.085845  
56141, 24956, 434.4433, 1.085690  
56142, 24652, 434.3814, 1.085535  
56143, 23944, 434.3194, 1.085381  
56144, 23372, 434.2575, 1.085226  
56145, 23260, 434.1956, 1.085071  
56146, 23448, 434.1336, 1.084916  
56147, 23458, 434.0717, 1.084762  
56148, 22960, 434.0098, 1.084607  
56149, 22114, 433.9479, 1.084452  
56150, 21440, 433.8859, 1.084297  
56151, 21402, 433.8240, 1.084143  
56152, 22038, 433.7621, 1.083988  
56153, 23012, 433.7002, 1.083833  
56154, 23944, 433.6382, 1.083678  
56155, 24650, 433.5763, 1.083524  
56156, 25148, 433.5144, 1.083369  
56157, 25490, 433.4524, 1.083214  
56158, 25696, 433.3905, 1.083059  
56159, 25804, 433.3286, 1.082905  
56160, 25958, 433.2667, 1.082750  
56161, 26304, 433.2047, 1.082595  
56162, 26806, 433.1428, 1.082440  
56163, 27244, 433.0809, 1.082286  
56164, 27374, 433.0190, 1.082131  
56165, 27160, 432.9570, 1.081976  
56166, 26814, 432.8951, 1.081821  
56167, 26612, 432.8332, 1.081667  
56168, 26656, 432.7713, 1.081512  
56169, 26832, 432.7093, 1.081357  
56170, 26932, 432.6474, 1.081202  
56171, 26822, 432.5855, 1.081047  
56172, 26516, 432.5235, 1.080893  
56173, 26082, 432.4616, 1.080738  
56174, 25598, 432.3997, 1.080583  
56175, 25170, 432.3378, 1.080428  
56176, 24886, 432.2758, 1.080274  
56177, 24788, 432.2139, 1.080119  
56178, 24808, 432.1520, 1.079964  
56179, 24838, 432.0901, 1.079809  
56180, 24848, 432.0281, 1.079655  
56181, 24934, 431.9662, 1.079500  
56182, 25206, 431.9043, 1.079345  
56183, 25600, 431.8423, 1.079190  
56184, 25890, 431.7804, 1.079036  
56185, 25870, 431.7185, 1.078881  
56186, 25572, 431.6566, 1.078726  
56187, 25264, 431.5946, 1.078571  
56188, 25196, 431.5327, 1.078417  
56189, 25356, 431.4708, 1.078262  
56190, 25518, 431.4089, 1.078107  
56191, 25478, 431.3469, 1.077952  
56192, 25272, 431.2850, 1.077798  
56193, 25094, 431.2231, 1.077643  
56194, 25042, 431.1612, 1.077488  
56195, 25014, 431.0992, 1.077333  
56196, 24810, 431.0373, 1.077179  
56197, 24388, 430.9754, 1.077024  
56198, 23882, 430.9134, 1.076869  
56199, 23460, 430.8515, 1.076714  
56200, 23148, 430.7896, 1.076560  
56201, 22918, 430.7277, 1.076405  
56202, 22834, 430.6657, 1.076250  
56203, 23106, 430.6038, 1.076095  
56204, 23860, 430.5419, 1.075940  
56205, 24894, 430.4800, 1.075786  
56206, 25738, 430.4180, 1.075631  
56207, 25994, 430.3561, 1.075476  
56208, 25682, 430.2942, 1.075321  
56209, 25184, 430.2322, 1.075167  
56210, 24902, 430.1703, 1.075012  
56211, 24898, 430.1084, 1.074857  
56212, 24944, 430.0465, 1.074702  
56213, 24838, 429.9845, 1.074548  
56214, 24582, 429.9226, 1.074393  
56215, 24354, 429.8607, 1.074238  
56216, 24246, 429.7988, 1.074083  
56217, 24180, 429.7368, 1.073929  
56218, 24092, 429.6749, 1.073774  
56219, 24072, 429.6130, 1.073619  
56220, 24284, 429.5511, 1.073464  
56221, 24744, 429.4891, 1.073310  
56222, 25228, 429.4272, 1.073155  
56223, 25452, 429.3653, 1.073000  
56224, 25374, 429.3033, 1.072845  
56225, 25220, 429.2414, 1.072691  
56226, 25248, 429.1795, 1.072536  
56227, 25492, 429.1176, 1.072381  
56228, 25772, 429.0556, 1.072226  
56229, 25970, 428.9937, 1.072072  
56230, 26172, 428.9318, 1.071917  
56231, 26502, 428.8699, 1.071762  
56232, 26832, 428.8079, 1.071607  
56233, 26798, 428.7460, 1.071452  
56234, 26120, 428.6841, 1.071298  
56235, 24986, 428.6221, 1.071143  
56236, 23978, 428.5602, 1.070988  
56237, 23578, 428.4983, 1.070833  
56238, 23772, 428.4364, 1.070679  
56239, 24080, 428.3744, 1.070524  
56240, 24066, 428.3125, 1.070369  
56241, 23718, 428.2506, 1.070214  
56242, 23366, 428.1887, 1.070060  
56243, 23288, 428.1267, 1.069905  
56244, 23444, 428.0648, 1.069750  
56245, 23624, 428.0029, 1.069595  
56246, 23754, 427.9410, 1.069441  
56247, 23996, 427.8790, 1.069286  
56248, 24504, 427.8171, 1.069131  
56249, 25140, 427.7552, 1.068976  
56250, 25560, 427.6932, 1.068822  
56251, 25530, 427.6313, 1.068667  
56252, 25174, 427.5694, 1.068512  
56253, 24884, 427.5075, 1.068357  
56254, 24916, 427.4455, 1.068203  
56255, 25248, 427.3836, 1.068048  
56256, 25690, 427.3217, 1.067893  
56257, 26152, 427.2598, 1.067738  
56258, 26708, 427.1978, 1.067584  
56259, 27426, 427.1359, 1.067429  
56260, 28168, 427.0740, 1.067274  
56261, 28688, 427.0120, 1.067119  
56262, 28842, 426.9501, 1.066965  
56263, 28722, 426.8882, 1.066810  
56264, 28512, 426.8263, 1.066655  
56265, 28274, 426.7643, 1.066500  
56266, 27938, 426.7024, 1.066345  
56267, 27470, 426.6405, 1.066191  
56268, 27008, 426.5786, 1.066036  
56269, 26754, 426.5166, 1.065881  
56270, 26750, 426.4547, 1.065726  
56271, 26848, 426.3928, 1.065572  
56272, 26870, 426.3309, 1.065417  
56273, 26878, 426.2689, 1.065262  
56274, 27100, 426.2070, 1.065107

56275, 27638, 426.1451, 1.064953  
56276, 28262, 426.0831, 1.064798  
56277, 28568, 426.0212, 1.064643  
56278, 28350, 425.9593, 1.064488  
56279, 27798, 425.8974, 1.064334  
56280, 27284, 425.8354, 1.064179  
56281, 26972, 425.7735, 1.064024  
56282, 26696, 425.7116, 1.063869  
56283, 26212, 425.6497, 1.063715  
56284, 25532, 425.5877, 1.063560  
56285, 24950, 425.5258, 1.063405  
56286, 24726, 424.9639, 1.063250  
56287, 24814, 425.4020, 1.063096  
56288, 24960, 425.3400, 1.062941  
56289, 24962, 425.2781, 1.062786  
56290, 24892, 425.2162, 1.062631  
56291, 24938, 425.1542, 1.062477  
56292, 25110, 425.0923, 1.062322  
56293, 25180, 425.0304, 1.062167  
56294, 24914, 424.9685, 1.062012  
56295, 24308, 424.9065, 1.061858  
56296, 23582, 424.8446, 1.061703  
56297, 22916, 424.7827, 1.061548  
56298, 22302, 424.7208, 1.061393  
56299, 21684, 424.6588, 1.061238  
56300, 21194, 424.5969, 1.061084  
56301, 21140, 424.5350, 1.060929  
56302, 21702, 424.4730, 1.060774  
56303, 22660, 424.4111, 1.060619  
56304, 23484, 424.3492, 1.060465  
56305, 23762, 424.2873, 1.060310  
56306, 23562, 424.2253, 1.060155  
56307, 23298, 424.1634, 1.060000  
56308, 23328, 424.1015, 1.059846  
56309, 23616, 424.0396, 1.059691  
56310, 23864, 423.9776, 1.059536  
56311, 23870, 423.9157, 1.059381  
56312, 23746, 423.8538, 1.059227  
56313, 23768, 423.7919, 1.059072  
56314, 24052, 423.7299, 1.058917  
56315, 24464, 423.6680, 1.058762  
56316, 24774, 423.6061, 1.058608  
56317, 24846, 423.5441, 1.058453  
56318, 24696, 423.4822, 1.058298  
56319, 24386, 423.4203, 1.058143  
56320, 23928, 423.3584, 1.057989  
56321, 23390, 423.2964, 1.057834  
56322, 22940, 423.2345, 1.057679  
56323, 22770, 423.1726, 1.057524  
56324, 22892, 423.1107, 1.057370  
56325, 23098, 423.0487, 1.057215  
56326, 23140, 422.9868, 1.057060  
56327, 22978, 422.9249, 1.056905  
56328, 22840, 422.8629, 1.056751  
56329, 22970, 422.8010, 1.056596  
56330, 23390, 422.7391, 1.056441  
56331, 23880, 422.6772, 1.056286  
56332, 24234, 422.6152, 1.056131  
56333, 24422, 422.5533, 1.055977  
56334, 24536, 422.4914, 1.055822  
56335, 24588, 422.4295, 1.055667  
56336, 24486, 422.3675, 1.055512  
56337, 24204, 422.3056, 1.055358  
56338, 23964, 422.2437, 1.055203  
56339, 24086, 422.1818, 1.055048  
56340, 24662, 422.1198, 1.054893  
56341, 25394, 422.0579, 1.054739  
56342, 25782, 421.9960, 1.054584  
56343, 25590, 421.9340, 1.054429  
56344, 25004, 421.8721, 1.054274  
56345, 24436, 421.8102, 1.054120  
56346, 24098, 421.7483, 1.053965  
56347, 23870, 421.6863, 1.053810  
56348, 23534, 421.6244, 1.053655  
56349, 23106, 421.5625, 1.053501  
56350, 22842, 421.5006, 1.053346

56351, 22910, 421.4386, 1.053191  
56352, 23186, 421.3767, 1.053036  
56353, 23334, 421.3148, 1.052882  
56354, 23204, 421.2528, 1.052727  
56355, 22946, 421.1909, 1.052572  
56356, 22834, 421.1290, 1.052417  
56357, 22922, 421.0671, 1.052263  
56358, 22954, 421.0051, 1.052108  
56359, 22684, 420.9432, 1.051953  
56360, 22162, 420.8813, 1.051798  
56361, 21712, 420.8194, 1.051644  
56362, 21622, 420.7574, 1.051489  
56363, 21900, 420.6955, 1.051334  
56364, 22344, 420.6336, 1.051179  
56365, 22836, 420.5717, 1.051024  
56366, 23458, 420.5097, 1.050870  
56367, 24312, 420.4478, 1.050715  
56368, 25286, 420.3859, 1.050560  
56369, 26090, 420.3239, 1.050405  
56370, 26476, 420.2620, 1.050251  
56371, 26484, 420.2001, 1.050096  
56372, 26320, 420.1382, 1.049941  
56373, 26112, 420.0762, 1.049786  
56374, 25802, 420.0143, 1.049632  
56375, 25324, 419.9524, 1.049477  
56376, 24824, 419.8905, 1.049322  
56377, 24582, 419.8285, 1.049167  
56378, 24724, 419.7666, 1.049013  
56379, 25034, 419.7047, 1.048858  
56380, 25150, 419.6427, 1.048703  
56381, 24954, 419.5808, 1.048548  
56382, 24744, 419.5189, 1.048394  
56383, 24914, 419.4570, 1.048239  
56384, 25508, 419.3950, 1.048084  
56385, 26110, 419.3331, 1.047929  
56386, 26186, 419.2712, 1.047775  
56387, 25582, 419.2093, 1.047620  
56388, 24652, 419.1473, 1.047465  
56389, 23886, 419.0854, 1.047310  
56390, 23528, 419.0235, 1.047156  
56391, 23462, 418.9616, 1.047001  
56392, 23494, 418.8996, 1.046846  
56393, 23584, 418.8377, 1.046691  
56394, 23764, 418.7758, 1.046537  
56395, 23964, 418.7138, 1.046382  
56396, 23930, 418.6519, 1.046227  
56397, 23504, 418.5900, 1.046072  
56398, 22840, 418.5281, 1.045917  
56399, 22358, 418.4661, 1.045763  
56400, 22384, 418.4042, 1.045608  
56401, 22882, 418.3423, 1.045453  
56402, 23502, 418.2804, 1.045298  
56403, 23924, 418.2184, 1.045144  
56404, 24100, 418.1565, 1.044989  
56405, 24176, 418.0946, 1.044834  
56406, 24232, 418.0326, 1.044679  
56407, 24170, 417.9707, 1.044525  
56408, 23876, 417.9088, 1.044370  
56409, 23422, 417.8469, 1.044215  
56410, 23068, 417.7849, 1.044060  
56411, 23070, 417.7230, 1.043906  
56412, 23472, 417.6611, 1.043751  
56413, 24102, 417.5992, 1.043596  
56414, 24730, 417.5372, 1.043441  
56415, 25202, 417.4753, 1.043287  
56416, 25454, 417.4134, 1.043132  
56417, 25480, 417.3515, 1.042977  
56418, 25336, 417.2895, 1.042822  
56419, 25162, 417.2276, 1.042668  
56420, 25102, 417.1657, 1.042513  
56421, 25164, 417.1037, 1.042358  
56422, 25164, 417.0418, 1.042203  
56423, 24892, 416.9799, 1.042049  
56424, 24356, 416.9180, 1.041894  
56425, 23858, 416.8560, 1.041739  
56426, 23744, 416.7941, 1.041584

56427, 24118, 416.7322, 1.041430  
56428, 24726, 416.6703, 1.041275  
56429, 25208, 416.6083, 1.041120  
56430, 25400, 416.5464, 1.040965  
56431, 25370, 416.4845, 1.040810  
56432, 25244, 416.4225, 1.040656  
56433, 25016, 416.3606, 1.040501  
56434, 24634, 416.2987, 1.040346  
56435, 24222, 416.2368, 1.040191  
56436, 24070, 416.1748, 1.040037  
56437, 24374, 416.1129, 1.039882  
56438, 24944, 416.0510, 1.039727  
56439, 25276, 415.9891, 1.039572  
56440, 24988, 415.9271, 1.039418  
56441, 24194, 415.8652, 1.039263  
56442, 23438, 415.8033, 1.039108  
56443, 23190, 415.7414, 1.038953  
56444, 23478, 415.6794, 1.038799  
56445, 23914, 415.6175, 1.038644  
56446, 24126, 415.5556, 1.038489  
56447, 24082, 415.4936, 1.038334  
56448, 23978, 415.4317, 1.038180  
56449, 23944, 415.3698, 1.038025  
56450, 23880, 415.3079, 1.037870  
56451, 23670, 415.2459, 1.037715  
56452, 23402, 415.1840, 1.037561  
56453, 23330, 415.1221, 1.037406  
56454, 23564, 415.0602, 1.037251  
56455, 23896, 415.0082, 1.037096  
56456, 23962, 414.9363, 1.036942  
56457, 23642, 414.8744, 1.036787  
56458, 23210, 414.8124, 1.036632  
56459, 23068, 414.7505, 1.036477  
56460, 23328, 414.6886, 1.036323  
56461, 23702, 414.6267, 1.036168  
56462, 23800, 414.5647, 1.036013  
56463, 23534, 414.5028, 1.035858  
56464, 23180, 414.4409, 1.035703  
56465, 23088, 414.3790, 1.035549  
56466, 23306, 414.3170, 1.035394  
56467, 23578, 414.2551, 1.035239  
56468, 23632, 414.1932, 1.035084  
56469, 23446, 414.1313, 1.034930  
56470, 23270, 414.0693, 1.034775  
56471, 23338, 414.0074, 1.034620  
56472, 23706, 413.9455, 1.034465  
56473, 24238, 413.8835, 1.034311  
56474, 24752, 413.8216, 1.034156  
56475, 25118, 413.7597, 1.034001  
56476, 25294, 413.6978, 1.033846  
56477, 25324, 413.6358, 1.033692  
56478, 25354, 413.5739, 1.033537  
56479, 25574, 413.5120, 1.033382  
56480, 26044, 413.4501, 1.033227  
56481, 26550, 413.3881, 1.033073  
56482, 26686, 413.3262, 1.032918  
56483, 26186, 413.2643, 1.032763  
56484, 25212, 413.2023, 1.032608  
56485, 24316, 413.1404, 1.032454  
56486, 24006, 413.0785, 1.032299  
56487, 24348, 413.0166, 1.032144  
56488, 24932, 412.9546, 1.031989  
56489, 25244, 412.8927, 1.031835  
56490, 25084, 412.8308, 1.031680  
56491, 24604, 412.7689, 1.031525  
56492, 24072, 412.7069, 1.031370  
56493, 23572, 412.6450, 1.031216  
56494, 23038, 412.5831, 1.031061  
56495, 22438, 412.5212, 1.030906  
56496, 21892, 412.4592, 1.030751  
56497, 21570, 412.3973, 1.030596  
56498, 21510, 412.3354, 1.030442  
56499, 21590, 412.2734, 1.030287  
56500, 21670, 412.2115, 1.030132  
56501, 21742, 412.1496, 1.029977  
56502, 21890, 412.0877, 1.029823

56503, 22150, 412.0257, 1.029668  
56504, 22456, 411.9638, 1.029513  
56505, 22726, 411.9019, 1.029358  
56506, 22992, 411.8400, 1.029204  
56507, 23328, 411.7780, 1.029049  
56508, 23706, 411.7161, 1.028894  
56509, 23922, 411.6542, 1.028739  
56510, 23804, 411.5923, 1.028585  
56511, 23398, 411.5303, 1.028430  
56512, 23026, 411.4684, 1.028275  
56513, 23014, 411.4065, 1.028120  
56514, 23416, 411.3445, 1.027966  
56515, 23990, 411.2826, 1.027811  
56516, 24490, 411.2207, 1.027656  
56517, 24904, 411.1588, 1.027501  
56518, 25422, 411.0968, 1.027347  
56519, 26144, 411.0349, 1.027192  
56520, 26914, 410.9730, 1.027037  
56521, 27400, 410.9111, 1.026882  
56522, 27410, 410.8491, 1.026728  
56523, 27018, 410.7872, 1.026573  
56524, 26482, 410.7253, 1.026418  
56525, 26004, 410.6633, 1.026263  
56526, 25646, 410.6014, 1.026108  
56527, 25394, 410.5395, 1.025954  
56528, 25278, 410.4776, 1.025799  
56529, 25304, 410.4156, 1.025644  
56530, 25378, 410.3537, 1.025489  
56531, 25322, 410.2918, 1.025335  
56532, 25040, 410.2299, 1.025180  
56533, 24630, 410.1679, 1.025025  
56534, 24278, 410.1060, 1.024870  
56535, 24066, 410.0441, 1.024716  
56536, 23848, 409.9822, 1.024561  
56537, 23464, 409.9202, 1.024406  
56538, 22938, 409.8583, 1.024251  
56539, 22560, 409.7964, 1.024097  
56540, 22548, 409.7344, 1.023942  
56541, 22806, 409.6725, 1.023787  
56542, 22940, 409.6106, 1.023632  
56543, 22638, 409.5487, 1.023478  
56544, 21972, 409.4867, 1.023323  
56545, 21364, 409.4248, 1.023168  
56546, 21204, 409.3629, 1.023013  
56547, 21522, 409.3010, 1.022859  
56548, 22006, 409.2390, 1.022704  
56549, 22296, 409.1771, 1.022549  
56550, 22232, 409.1152, 1.022394  
56551, 21854, 409.0532, 1.022240  
56552, 21288, 408.9913, 1.022085  
56553, 20642, 408.9294, 1.021930  
56554, 20068, 408.8675, 1.021775  
56555, 19772, 408.8055, 1.021621  
56556, 19904, 408.7436, 1.021466  
56557, 20432, 408.6817, 1.021311  
56558, 21130, 408.6198, 1.021156  
56559, 21798, 408.5578, 1.021001  
56560, 22414, 408.4959, 1.020847  
56561, 23080, 408.4340, 1.020692  
56562, 23816, 408.3721, 1.020537  
56563, 24444, 408.3101, 1.020382  
56564, 24744, 408.2482, 1.020228  
56565, 24676, 408.1863, 1.020073  
56566, 24454, 408.1243, 1.019918  
56567, 24334, 408.0624, 1.019763  
56568, 24356, 408.0005, 1.019609  
56569, 24370, 407.9386, 1.019454  
56570, 24290, 407.8766, 1.019299  
56571, 24242, 407.8147, 1.019144  
56572, 24434, 407.7528, 1.018990  
56573, 24900, 407.6909, 1.018835  
56574, 25382, 407.6289, 1.018680  
56575, 25552, 407.5670, 1.018525  
56576, 25342, 407.5051, 1.018371  
56577, 24976, 407.4431, 1.018216  
56578, 24704, 407.3812, 1.018061

56579, 24550, 407.3193, 1.017906  
56580, 24326, 407.2574, 1.017752  
56581, 23954, 407.1954, 1.017597  
56582, 23618, 407.1335, 1.017442  
56583, 23594, 407.0716, 1.017287  
56584, 23912, 407.0097, 1.017133  
56585, 24264, 406.9477, 1.016978  
56586, 24300, 406.8858, 1.016823  
56587, 24000, 406.8239, 1.016668  
56588, 23684, 406.7620, 1.016514  
56589, 23662, 406.7000, 1.016359  
56590, 23860, 406.6381, 1.016204  
56591, 23926, 406.5762, 1.016049  
56592, 23604, 406.5142, 1.015894  
56593, 23072, 406.4523, 1.015740  
56594, 22786, 406.3904, 1.015585  
56595, 23046, 406.3285, 1.015430  
56596, 23718, 406.2665, 1.015275  
56597, 24374, 406.2046, 1.015121  
56598, 24682, 406.1427, 1.014966  
56599, 24574, 406.0808, 1.014811  
56600, 24140, 406.0188, 1.014656  
56601, 23418, 405.9569, 1.014502  
56602, 22392, 405.8950, 1.014347  
56603, 21186, 405.8330, 1.014192  
56604, 20156, 405.7711, 1.014037  
56605, 19722, 405.7092, 1.013883  
56606, 19994, 405.6473, 1.013728  
56607, 20700, 405.5853, 1.013573  
56608, 21386, 405.5234, 1.013418  
56609, 21754, 405.4615, 1.013264  
56610, 21832, 405.3996, 1.013109  
56611, 21826, 405.3376, 1.012954  
56612, 21876, 405.2757, 1.012799  
56613, 22008, 405.2138, 1.012645  
56614, 22174, 405.1519, 1.012490  
56615, 22378, 405.0899, 1.012335  
56616, 22638, 405.0280, 1.012180  
56617, 22958, 404.9661, 1.012026  
56618, 23332, 404.9041, 1.011871  
56619, 23802, 404.8422, 1.011716  
56620, 24398, 404.7803, 1.011561  
56621, 24984, 404.7184, 1.011407  
56622, 25236, 404.6564, 1.011252  
56623, 24850, 404.5945, 1.011097  
56624, 23870, 404.5326, 1.010942  
56625, 22788, 404.4707, 1.010787  
56626, 22224, 404.4087, 1.010633  
56627, 22424, 404.3468, 1.010478  
56628, 23080, 404.2849, 1.010323  
56629, 23614, 404.2229, 1.010168  
56630, 23704, 404.1610, 1.010014  
56631, 23510, 404.0991, 1.009859  
56632, 23384, 404.0372, 1.009704  
56633, 23478, 403.9752, 1.009549  
56634, 23618, 403.9133, 1.009395  
56635, 23604, 403.8514, 1.009240  
56636, 23510, 403.7895, 1.009085  
56637, 23628, 403.7275, 1.008930  
56638, 24132, 403.6656, 1.008776  
56639, 24816, 403.6037, 1.008621  
56640, 25254, 403.5418, 1.008466  
56641, 25238, 403.4798, 1.008311  
56642, 24962, 403.4179, 1.008157  
56643, 24824, 403.3560, 1.008002  
56644, 25030, 403.2940, 1.007847  
56645, 25418, 403.2321, 1.007692  
56646, 25698, 403.1702, 1.007538  
56647, 25740, 403.1083, 1.007383  
56648, 25618, 403.0463, 1.007228  
56649, 25428, 402.9844, 1.007073  
56650, 25140, 402.9225, 1.006919  
56651, 24678, 402.8606, 1.006764  
56652, 24128, 402.7986, 1.006609  
56653, 23768, 402.7367, 1.006454  
56654, 23790, 402.6748, 1.006300

56655, 24106, 402.6128, 1.006145  
56656, 24328, 402.5509, 1.005990  
56657, 24134, 402.4890, 1.005835  
56658, 23508, 402.4271, 1.005680  
56659, 22728, 402.3651, 1.005526  
56660, 22072, 402.3032, 1.005371  
56661, 21650, 402.2413, 1.005216  
56662, 21422, 402.1794, 1.005061  
56663, 21364, 402.1174, 1.004907  
56664, 21526, 402.0555, 1.004752  
56665, 21912, 401.9936, 1.004597  
56666, 22408, 401.9317, 1.004442  
56667, 22882, 401.8697, 1.004288  
56668, 23328, 401.8078, 1.004133  
56669, 23872, 401.7459, 1.003978  
56670, 24604, 401.6839, 1.003823  
56671, 25372, 401.6220, 1.003669  
56672, 25894, 401.5601, 1.003514  
56673, 26016, 401.4982, 1.003359  
56674, 25888, 401.4362, 1.003204  
56675, 25818, 401.3743, 1.003050  
56676, 25946, 401.3124, 1.002895  
56677, 26104, 401.2505, 1.002740  
56678, 26030, 401.1885, 1.002585  
56679, 25666, 401.1266, 1.002431  
56680, 25210, 401.0647, 1.002276  
56681, 24890, 401.0027, 1.002121  
56682, 24698, 400.9408, 1.001966  
56683, 24418, 400.8789, 1.001812  
56684, 23954, 400.8170, 1.001657  
56685, 23496, 400.7550, 1.001502  
56686, 23376, 400.6931, 1.001347  
56687, 23720, 400.6312, 1.001193  
56688, 24280, 400.5693, 1.001038  
56689, 24672, 400.5073, 1.000883  
56690, 24726, 400.4454, 1.000728  
56691, 24596, 400.3835, 1.000573  
56692, 24542, 400.3216, 1.000419  
56693, 24640, 400.2596, 1.000264  
56694, 24718, 400.1977, 1.000109  
56695, 24608, 400.1358, 0.999954  
56696, 24340, 400.0738, 0.999800  
56697, 24108, 400.0119, 0.999645  
56698, 24046, 399.9500, 0.999490  
56699, 24118, 399.8881, 0.999335  
56700, 24200, 399.8261, 0.999181  
56701, 24222, 399.7642, 0.999026  
56702, 24180, 399.7023, 0.998871  
56703, 24050, 399.6404, 0.998716  
56704, 23736, 399.5784, 0.998562  
56705, 23184, 399.5165, 0.998407  
56706, 22526, 399.4546, 0.998252  
56707, 22056, 399.3926, 0.998097  
56708, 21980, 399.3307, 0.997943  
56709, 22254, 399.2688, 0.997788  
56710, 22652, 399.2069, 0.997633  
56711, 23020, 399.1449, 0.997478  
56712, 23378, 399.0830, 0.997324  
56713, 23812, 399.0211, 0.997169  
56714, 24246, 398.9592, 0.997014  
56715, 24444, 398.8972, 0.996859  
56716, 24260, 398.8353, 0.996705  
56717, 23878, 398.7734, 0.996550  
56718, 23696, 398.7115, 0.996395  
56719, 23964, 398.6495, 0.996240  
56720, 24506, 398.5876, 0.996086  
56721, 24914, 398.5257, 0.995931  
56722, 24922, 398.4637, 0.995776  
56723, 24692, 398.4018, 0.995621  
56724, 24596, 398.3399, 0.995466  
56725, 24842, 398.2780, 0.995312  
56726, 25274, 398.2160, 0.995157  
56727, 25626, 398.1541, 0.995002  
56728, 25798, 398.0922, 0.994847  
56729, 25956, 398.0303, 0.994693  
56730, 26264, 397.9683, 0.994538

|                                  |                                  |                                  |
|----------------------------------|----------------------------------|----------------------------------|
| 56731, 26620, 397.9064, 0.994383 | 56807, 22674, 393.2000, 0.982622 | 56883, 20036, 388.4935, 0.970860 |
| 56732, 26724, 397.8445, 0.994228 | 56808, 23658, 393.1380, 0.982467 | 56884, 20752, 388.4316, 0.970705 |
| 56733, 26384, 397.7826, 0.994074 | 56809, 24360, 393.0761, 0.982312 | 56885, 21342, 388.3697, 0.970550 |
| 56734, 25712, 397.7206, 0.993919 | 56810, 24824, 393.0142, 0.982157 | 56886, 21746, 388.3077, 0.970396 |
| 56735, 24998, 397.6587, 0.993764 | 56811, 25078, 392.9523, 0.982003 | 56887, 22112, 388.2458, 0.970241 |
| 56736, 24444, 397.5968, 0.993609 | 56812, 24950, 392.8903, 0.981848 | 56888, 22446, 388.1839, 0.970086 |
| 56737, 24018, 397.5348, 0.993455 | 56813, 24240, 392.8284, 0.981693 | 56889, 22552, 388.1220, 0.969931 |
| 56738, 23630, 397.4729, 0.993300 | 56814, 23054, 392.7665, 0.981538 | 56890, 22326, 388.0600, 0.969777 |
| 56739, 23330, 397.4110, 0.993145 | 56815, 21828, 392.7045, 0.981384 | 56891, 21988, 387.9981, 0.969622 |
| 56740, 23282, 397.3491, 0.992990 | 56816, 21000, 392.6426, 0.981229 | 56892, 21938, 387.9362, 0.969467 |
| 56741, 23554, 397.2871, 0.992836 | 56817, 20650, 392.5807, 0.981074 | 56893, 22328, 387.8742, 0.969312 |
| 56742, 23932, 397.2252, 0.992681 | 56818, 20510, 392.5188, 0.980919 | 56894, 22882, 387.8123, 0.969158 |
| 56743, 24076, 397.1633, 0.992526 | 56819, 20380, 392.4568, 0.980764 | 56895, 23172, 387.7504, 0.969003 |
| 56744, 23812, 397.1014, 0.992371 | 56820, 20416, 392.3949, 0.980610 | 56896, 23086, 387.6885, 0.968848 |
| 56745, 23304, 397.0394, 0.992217 | 56821, 20968, 392.3330, 0.980455 | 56897, 22960, 387.6265, 0.968693 |
| 56746, 22918, 396.9775, 0.992062 | 56822, 22104, 392.2711, 0.980300 | 56898, 23216, 387.5646, 0.968539 |
| 56747, 22888, 396.9156, 0.991907 | 56823, 23402, 392.2091, 0.980145 | 56899, 23904, 387.5027, 0.968384 |
| 56748, 23168, 396.8536, 0.991752 | 56824, 24258, 392.1472, 0.979991 | 56900, 24640, 387.4408, 0.968229 |
| 56749, 23534, 396.7917, 0.991598 | 56825, 24428, 392.0853, 0.979836 | 56901, 24960, 387.3788, 0.968074 |
| 56750, 23804, 396.7298, 0.991443 | 56826, 24200, 392.0233, 0.979681 | 56902, 24788, 387.3169, 0.967920 |
| 56751, 23914, 396.6679, 0.991288 | 56827, 24070, 391.9614, 0.979526 | 56903, 24426, 387.2550, 0.967765 |
| 56752, 23874, 396.6059, 0.991133 | 56828, 24222, 391.8995, 0.979372 | 56904, 24254, 387.1930, 0.967610 |
| 56753, 23708, 396.5440, 0.990979 | 56829, 24404, 391.8376, 0.979217 | 56905, 24372, 387.1311, 0.967455 |
| 56754, 23446, 396.4821, 0.990824 | 56830, 24256, 391.7756, 0.979062 | 56906, 24592, 387.0692, 0.967301 |
| 56755, 23186, 396.4202, 0.990669 | 56831, 23726, 391.7137, 0.978907 | 56907, 24680, 387.0073, 0.967146 |
| 56756, 23014, 396.3582, 0.990514 | 56832, 23122, 391.6518, 0.978753 | 56908, 24556, 386.9453, 0.966991 |
| 56757, 22920, 396.2963, 0.990359 | 56833, 22800, 391.5899, 0.978598 | 56909, 24270, 386.8834, 0.966836 |
| 56758, 22746, 396.2344, 0.990205 | 56834, 22852, 391.5279, 0.978443 | 56910, 23918, 386.8215, 0.966682 |
| 56759, 22346, 396.1725, 0.990050 | 56835, 23142, 391.4660, 0.978288 | 56911, 23570, 386.7596, 0.966527 |
| 56760, 21754, 396.1105, 0.989895 | 56836, 23528, 391.4041, 0.978134 | 56912, 23342, 386.6976, 0.966372 |
| 56761, 21202, 396.0486, 0.989740 | 56837, 23960, 391.3422, 0.977979 | 56913, 23364, 386.6357, 0.966217 |
| 56762, 20910, 395.9867, 0.989586 | 56838, 24398, 391.2802, 0.977824 | 56914, 23668, 386.5738, 0.966063 |
| 56763, 20876, 395.9247, 0.989431 | 56839, 24676, 391.2183, 0.977669 | 56915, 24086, 386.5119, 0.965908 |
| 56764, 20878, 395.8628, 0.989276 | 56840, 24570, 391.1564, 0.977515 | 56916, 24348, 386.4499, 0.965753 |
| 56765, 20706, 395.8009, 0.989121 | 56841, 24046, 391.0944, 0.977360 | 56917, 24318, 386.3880, 0.965598 |
| 56766, 20368, 395.7390, 0.988967 | 56842, 23324, 391.0325, 0.977205 | 56918, 24124, 386.3261, 0.965443 |
| 56767, 20090, 395.6770, 0.988812 | 56843, 22708, 390.9706, 0.977050 | 56919, 24012, 386.2641, 0.965289 |
| 56768, 20066, 395.6151, 0.988657 | 56844, 22340, 390.9087, 0.976896 | 56920, 24070, 386.2022, 0.965134 |
| 56769, 20318, 395.5532, 0.988502 | 56845, 22188, 390.8467, 0.976741 | 56921, 24110, 386.1403, 0.964979 |
| 56770, 20694, 395.4913, 0.988348 | 56846, 22262, 390.7848, 0.976586 | 56922, 23872, 386.0784, 0.964824 |
| 56771, 21052, 395.4293, 0.988193 | 56847, 22694, 390.7229, 0.976431 | 56923, 23342, 386.0164, 0.964670 |
| 56772, 21326, 395.3674, 0.988038 | 56848, 23578, 390.6610, 0.976277 | 56924, 22794, 385.9545, 0.964515 |
| 56773, 21520, 395.3055, 0.987883 | 56849, 24668, 390.5990, 0.976122 | 56925, 22590, 385.8926, 0.964360 |
| 56774, 21624, 395.2435, 0.987729 | 56850, 25396, 390.5371, 0.975967 | 56926, 22862, 385.8307, 0.964205 |
| 56775, 21644, 395.1816, 0.987574 | 56851, 25332, 390.4752, 0.975812 | 56927, 23438, 385.7687, 0.964051 |
| 56776, 21654, 395.1197, 0.987419 | 56852, 24636, 390.4132, 0.975657 | 56928, 24030, 385.7068, 0.963896 |
| 56777, 21764, 395.0578, 0.987264 | 56853, 24014, 390.3513, 0.975503 | 56929, 24452, 385.6449, 0.963741 |
| 56778, 22002, 394.9958, 0.987110 | 56854, 24126, 390.2894, 0.975348 | 56930, 24678, 385.5830, 0.963586 |
| 56779, 22220, 394.9339, 0.986955 | 56855, 24978, 390.2275, 0.975193 | 56931, 24708, 385.5210, 0.963432 |
| 56780, 22194, 394.8720, 0.986800 | 56856, 25942, 390.1655, 0.975038 | 56932, 24516, 385.4591, 0.963277 |
| 56781, 21874, 394.8101, 0.986645 | 56857, 26322, 390.1036, 0.974884 | 56933, 24072, 385.3972, 0.963122 |
| 56782, 21470, 394.7481, 0.986491 | 56858, 25940, 390.0417, 0.974729 | 56934, 23498, 385.3352, 0.962967 |
| 56783, 21296, 394.6862, 0.986336 | 56859, 25152, 389.9798, 0.974574 | 56935, 22998, 385.2733, 0.962813 |
| 56784, 21496, 394.6243, 0.986181 | 56860, 24420, 389.9178, 0.974419 | 56936, 22722, 385.2114, 0.962658 |
| 56785, 21924, 394.5624, 0.986026 | 56861, 23880, 389.8559, 0.974265 | 56937, 22638, 385.1495, 0.962503 |
| 56786, 22312, 394.5004, 0.985872 | 56862, 23416, 389.7940, 0.974110 | 56938, 22560, 385.0875, 0.962348 |
| 56787, 22502, 394.4385, 0.985717 | 56863, 22988, 389.7321, 0.973955 | 56939, 22380, 385.0256, 0.962194 |
| 56788, 22532, 394.3766, 0.985562 | 56864, 22764, 389.6701, 0.973800 | 56940, 22156, 384.9637, 0.962039 |
| 56789, 22476, 394.3146, 0.985407 | 56865, 22866, 389.6082, 0.973646 | 56941, 22052, 384.9018, 0.961884 |
| 56790, 22320, 394.2527, 0.985252 | 56866, 23098, 389.5463, 0.973491 | 56942, 22186, 384.8398, 0.961729 |
| 56791, 21984, 394.1908, 0.985098 | 56867, 23030, 389.4843, 0.973336 | 56943, 22528, 384.7779, 0.961575 |
| 56792, 21488, 394.1289, 0.984943 | 56868, 22446, 389.4224, 0.973181 | 56944, 22960, 384.7160, 0.961420 |
| 56793, 21016, 394.0669, 0.984788 | 56869, 21610, 389.3605, 0.973027 | 56945, 23374, 384.6540, 0.961265 |
| 56794, 20746, 394.0050, 0.984633 | 56870, 21052, 389.2986, 0.972872 | 56946, 23752, 384.5921, 0.961110 |
| 56795, 20676, 393.9431, 0.984479 | 56871, 21062, 389.2366, 0.972717 | 56947, 24126, 384.5302, 0.960956 |
| 56796, 20670, 393.8812, 0.984324 | 56872, 21452, 389.1747, 0.972562 | 56948, 24588, 384.4683, 0.960801 |
| 56797, 20676, 393.8192, 0.984169 | 56873, 21854, 389.1128, 0.972408 | 56949, 25234, 384.4063, 0.960646 |
| 56798, 20850, 393.7573, 0.984014 | 56874, 22148, 389.0509, 0.972253 | 56950, 26100, 384.3444, 0.960491 |
| 56799, 21366, 393.6954, 0.983860 | 56875, 22566, 388.9889, 0.972098 | 56951, 27058, 384.2825, 0.960336 |
| 56800, 22118, 393.6334, 0.983705 | 56876, 23252, 388.9270, 0.971943 | 56952, 27768, 384.2206, 0.960182 |
| 56801, 22666, 393.5715, 0.983550 | 56877, 23908, 388.8651, 0.971789 | 56953, 27876, 384.1586, 0.960027 |
| 56802, 22586, 393.5096, 0.983395 | 56878, 23920, 388.8031, 0.971634 | 56954, 27284, 384.0967, 0.959872 |
| 56803, 21914, 393.4477, 0.983241 | 56879, 22962, 388.7412, 0.971479 | 56955, 26314, 384.0348, 0.959717 |
| 56804, 21190, 393.3857, 0.983086 | 56880, 21406, 388.6793, 0.971324 | 56956, 25528, 383.9729, 0.959563 |
| 56805, 21036, 393.3238, 0.982931 | 56881, 20086, 388.6174, 0.971170 | 56957, 25334, 383.9109, 0.959408 |
| 56806, 21638, 393.2619, 0.982776 | 56882, 19640, 388.5554, 0.971015 | 56958, 25690, 383.8490, 0.959253 |

56959, 26198, 383.7871, 0.959098  
56960, 26440, 383.7251, 0.958944  
56961, 26278, 383.6632, 0.958789  
56962, 25838, 383.6013, 0.958634  
56963, 25300, 383.5394, 0.958479  
56964, 24734, 383.4774, 0.958325  
56965, 24144, 383.4155, 0.958170  
56966, 23552, 383.3536, 0.958015  
56967, 23044, 383.2917, 0.957860  
56968, 22598, 383.2297, 0.957706  
56969, 22118, 383.1678, 0.957551  
56970, 21566, 383.1059, 0.957396  
56971, 21134, 383.0439, 0.957241  
56972, 21176, 382.9820, 0.957087  
56973, 21878, 382.9201, 0.956932  
56974, 22998, 382.8582, 0.956777  
56975, 23944, 382.7962, 0.956622  
56976, 24256, 382.7343, 0.956468  
56977, 23946, 382.6724, 0.956313  
56978, 23498, 382.6105, 0.956158  
56979, 23412, 382.5485, 0.956003  
56980, 23828, 382.4866, 0.955849  
56981, 24480, 382.4247, 0.955694  
56982, 24998, 382.3628, 0.955539  
56983, 25196, 382.3008, 0.955384  
56984, 25090, 382.2389, 0.955229  
56985, 24768, 382.1770, 0.955075  
56986, 24290, 382.1150, 0.954920  
56987, 23744, 382.0531, 0.954765  
56988, 23324, 381.9912, 0.954610  
56989, 23224, 381.9293, 0.954456  
56990, 23508, 381.8673, 0.954301  
56991, 24012, 381.8054, 0.954146  
56992, 24516, 381.7435, 0.953991  
56993, 24896, 381.6816, 0.953837  
56994, 25204, 381.6196, 0.953682  
56995, 25536, 381.5577, 0.953527  
56996, 25874, 381.4958, 0.953372  
56997, 26148, 381.4338, 0.953218  
56998, 26356, 381.3719, 0.953063  
56999, 26574, 381.3100, 0.952908  
57000, 26798, 381.2481, 0.952753  
57001, 26864, 381.1861, 0.952599  
57002, 26546, 381.1242, 0.952444  
57003, 25836, 381.0623, 0.952289  
57004, 25088, 381.0004, 0.952134  
57005, 24758, 380.9384, 0.951980  
57006, 25020, 380.8765, 0.951825  
57007, 25546, 380.8146, 0.951670  
57008, 25786, 380.7527, 0.951515  
57009, 25432, 380.6907, 0.951361  
57010, 24676, 380.6288, 0.951206  
57011, 23984, 380.5669, 0.951051  
57012, 23676, 380.5049, 0.950896  
57013, 23732, 380.4430, 0.950742  
57014, 23904, 380.3811, 0.950587  
57015, 24064, 380.3192, 0.950432  
57016, 24260, 380.2572, 0.950277  
57017, 24598, 380.1953, 0.950122  
57018, 25054, 380.1334, 0.949968  
57019, 25486, 380.0715, 0.949813  
57020, 25796, 380.0095, 0.949658  
57021, 26018, 379.9476, 0.949503  
57022, 26242, 379.8857, 0.949349  
57023, 26428, 379.8237, 0.949194  
57024, 26440, 379.7618, 0.949039  
57025, 26178, 379.6999, 0.948884  
57026, 25722, 379.6380, 0.948730  
57027, 25302, 379.5760, 0.948575  
57028, 25132, 379.5141, 0.948420  
57029, 25292, 379.4522, 0.948265  
57030, 25708, 379.3903, 0.948111  
57031, 26268, 379.3283, 0.947956  
57032, 26838, 379.2664, 0.947801  
57033, 27280, 379.2045, 0.947646  
57034, 27482, 379.1426, 0.947492

57035, 27424, 379.0806, 0.947337  
57036, 27232, 379.0187, 0.947182  
57037, 27056, 378.9568, 0.947027  
57038, 26926, 378.8948, 0.946873  
57039, 26684, 378.8329, 0.946718  
57040, 26168, 378.7710, 0.946563  
57041, 25412, 378.7091, 0.946408  
57042, 24646, 378.6471, 0.946254  
57043, 24092, 378.5852, 0.946099  
57044, 23760, 378.5233, 0.945944  
57045, 23510, 378.4614, 0.945789  
57046, 23268, 378.3994, 0.945635  
57047, 23152, 378.3375, 0.945480  
57048, 23310, 378.2756, 0.945325  
57049, 23624, 378.2136, 0.945170  
57050, 23736, 378.1517, 0.945015  
57051, 23390, 378.0898, 0.944861  
57052, 22826, 378.0279, 0.944706  
57053, 22650, 377.9659, 0.944551  
57054, 23326, 377.9040, 0.944396  
57055, 24702, 377.8421, 0.944242  
57056, 26072, 377.7802, 0.944087  
57057, 26822, 377.7182, 0.943932  
57058, 26906, 377.6563, 0.943777  
57059, 26796, 377.5944, 0.943623  
57060, 26918, 377.5325, 0.943468  
57061, 27208, 377.4705, 0.943313  
57062, 27266, 377.4086, 0.943158  
57063, 26844, 377.3467, 0.943004  
57064, 26154, 377.2847, 0.942849  
57065, 25652, 377.2228, 0.942694  
57066, 25558, 377.1609, 0.942539  
57067, 25644, 377.0990, 0.942385  
57068, 25514, 377.0370, 0.942230  
57069, 25018, 376.9751, 0.942075  
57070, 24358, 376.9132, 0.941920  
57071, 23862, 376.8513, 0.941766  
57072, 23658, 376.7893, 0.941611  
57073, 23642, 376.7274, 0.941456  
57074, 23694, 376.6655, 0.941301  
57075, 23788, 376.6035, 0.941147  
57076, 23960, 376.5416, 0.940992  
57077, 24122, 376.4797, 0.940837  
57078, 24114, 376.4178, 0.940682  
57079, 23850, 376.3558, 0.940527  
57080, 23410, 376.2939, 0.940373  
57081, 22948, 376.2320, 0.940218  
57082, 22474, 376.1701, 0.940063  
57083, 21908, 376.1081, 0.939908  
57084, 21302, 376.0462, 0.939754  
57085, 20948, 375.9843, 0.939599  
57086, 21212, 375.9224, 0.939444  
57087, 22136, 375.8604, 0.939289  
57088, 23292, 375.7985, 0.939135  
57089, 24138, 375.7366, 0.938980  
57090, 24452, 375.6746, 0.938825  
57091, 24502, 375.6127, 0.938670  
57092, 24646, 375.5508, 0.938516  
57093, 24906, 375.4889, 0.938361  
57094, 24932, 375.4269, 0.938206  
57095, 24454, 375.3650, 0.938051  
57096, 23690, 375.3031, 0.937897  
57097, 23216, 375.2412, 0.937742  
57098, 23420, 375.1792, 0.937587  
57099, 24126, 375.1173, 0.937432  
57100, 24790, 375.0554, 0.937278  
57101, 25070, 374.9934, 0.937123  
57102, 25130, 374.9315, 0.936968  
57103, 25370, 374.8696, 0.936813  
57104, 25886, 374.8077, 0.936659  
57105, 26332, 374.7457, 0.936504  
57106, 26288, 374.6838, 0.936349  
57107, 25740, 374.6219, 0.936194  
57108, 25108, 374.5600, 0.936040  
57109, 24794, 374.4980, 0.935885  
57110, 24770, 374.4361, 0.935730

57111, 24646, 374.3742, 0.935575  
57112, 24170, 374.3123, 0.935420  
57113, 23534, 374.2503, 0.935266  
57114, 23188, 374.1884, 0.935111  
57115, 23346, 374.1265, 0.934956  
57116, 23786, 374.0645, 0.934801  
57117, 24082, 374.0026, 0.934647  
57118, 24092, 373.9407, 0.934492  
57119, 24048, 373.8788, 0.934337  
57120, 24250, 373.8168, 0.934182  
57121, 24710, 373.7549, 0.934028  
57122, 25098, 373.6930, 0.933873  
57123, 25118, 373.6311, 0.933718  
57124, 24806, 373.5691, 0.933563  
57125, 24502, 373.5072, 0.933409  
57126, 24484, 373.4453, 0.933254  
57127, 24714, 373.3833, 0.933099  
57128, 24918, 373.3214, 0.932944  
57129, 24872, 373.2595, 0.932790  
57130, 24620, 373.1976, 0.932635  
57131, 24412, 373.1356, 0.932480  
57132, 24460, 373.0737, 0.932325  
57133, 24772, 373.0118, 0.932171  
57134, 25172, 372.9499, 0.932016  
57135, 25444, 372.8879, 0.931861  
57136, 25484, 372.8260, 0.931706  
57137, 25360, 372.7641, 0.931552  
57138, 25280, 372.7022, 0.931397  
57139, 25454, 372.6402, 0.931242  
57140, 25926, 372.5783, 0.931087  
57141, 26492, 372.5164, 0.930933  
57142, 26844, 372.4544, 0.930778  
57143, 26812, 372.3925, 0.930623  
57144, 26538, 372.3306, 0.930468  
57145, 26348, 372.2687, 0.930313  
57146, 26446, 372.2067, 0.930159  
57147, 26678, 372.1448, 0.930004  
57148, 26690, 372.0829, 0.929849  
57149, 26272, 372.0210, 0.929694  
57150, 25586, 371.9590, 0.929540  
57151, 24994, 371.8971, 0.929385  
57152, 24680, 371.8352, 0.929230  
57153, 24480, 371.7733, 0.929075  
57154, 24120, 371.7113, 0.928921  
57155, 23558, 371.6494, 0.928766  
57156, 23086, 371.5875, 0.928611  
57157, 23016, 371.5255, 0.928456  
57158, 23338, 371.4636, 0.928302  
57159, 23734, 371.4017, 0.928147  
57160, 23942, 371.3398, 0.927992  
57161, 24080, 371.2778, 0.927837  
57162, 24528, 371.2159, 0.927683  
57163, 25520, 371.1540, 0.927528  
57164, 26814, 371.0921, 0.927373  
57165, 27854, 371.0301, 0.927218  
57166, 28164, 370.9682, 0.927064  
57167, 27694, 370.9063, 0.926909  
57168, 26732, 370.8443, 0.926754  
57169, 25658, 370.7824, 0.926599  
57170, 24756, 370.7205, 0.926445  
57171, 24234, 370.6586, 0.926290  
57172, 24268, 370.5966, 0.926135  
57173, 24894, 370.5347, 0.925980  
57174, 25868, 370.4728, 0.925826  
57175, 26748, 370.4109, 0.925671  
57176, 27160, 370.3489, 0.925516  
57177, 27046, 370.2870, 0.925361  
57178, 26636, 370.2251, 0.925206  
57179, 26162, 370.1632, 0.925052  
57180, 25654, 370.1012, 0.924897  
57181, 25042, 370.0393, 0.924742  
57182, 24364, 369.9774, 0.924587  
57183, 23836, 369.9154, 0.924433  
57184, 23622, 369.8535, 0.924278  
57185, 23612, 369.7916, 0.924123  
57186, 23542, 369.7297, 0.923968



57187, 23312, 369.6677, 0.923814  
57188, 23180, 369.6058, 0.923659  
57189, 23518, 369.5439, 0.923504  
57190, 24342, 369.4820, 0.923349  
57191, 25180, 369.4200, 0.923195  
57192, 25432, 369.3581, 0.923040  
57193, 24960, 369.2962, 0.922885  
57194, 24268, 369.2342, 0.922730  
57195, 24046, 369.1723, 0.922576  
57196, 24560, 369.1104, 0.922421  
57197, 25426, 369.0485, 0.922266  
57198, 26026, 368.9865, 0.922111  
57199, 26008, 368.9246, 0.921957  
57200, 25540, 368.8627, 0.921802  
57201, 25018, 368.8008, 0.921647  
57202, 24730, 368.7388, 0.921492  
57203, 24730, 368.6769, 0.921338  
57204, 24938, 368.6150, 0.921183  
57205, 25286, 368.5531, 0.921028  
57206, 25676, 368.4911, 0.920873  
57207, 25952, 368.4292, 0.920719  
57208, 25980, 368.3673, 0.920564  
57209, 25840, 368.3053, 0.920409  
57210, 25806, 368.2434, 0.920254  
57211, 26076, 368.1815, 0.920099  
57212, 26528, 368.1196, 0.919945  
57213, 26778, 368.0576, 0.919790  
57214, 26562, 367.9957, 0.919635  
57215, 26002, 367.9338, 0.919480  
57216, 25490, 367.8719, 0.919326  
57217, 25280, 367.8099, 0.919171  
57218, 25244, 367.7480, 0.919016  
57219, 25076, 367.6861, 0.918861  
57220, 24640, 367.6241, 0.918707  
57221, 24152, 367.5622, 0.918552  
57222, 23878, 367.5003, 0.918397  
57223, 23834, 367.4384, 0.918242  
57224, 23788, 367.3764, 0.918088  
57225, 23618, 367.3145, 0.917933  
57226, 23524, 367.2526, 0.917778  
57227, 23850, 367.1907, 0.917623  
57228, 24610, 367.1287, 0.917469  
57229, 25344, 367.0668, 0.917314  
57230, 25474, 367.0049, 0.917159  
57231, 24848, 366.9430, 0.917004  
57232, 23890, 366.8810, 0.916850  
57233, 23200, 366.8191, 0.916695  
57234, 23026, 366.7572, 0.916540  
57235, 23188, 366.6952, 0.916385  
57236, 23398, 366.6333, 0.916231  
57237, 23646, 366.5714, 0.916076  
57238, 24108, 366.5095, 0.915921  
57239, 24796, 366.4475, 0.915766  
57240, 25400, 366.3856, 0.915612  
57241, 25576, 366.3237, 0.915457  
57242, 25294, 366.2618, 0.915302  
57243, 24946, 366.1998, 0.915147  
57244, 24900, 366.1379, 0.914992  
57245, 25152, 366.0760, 0.914838  
57246, 25390, 366.0140, 0.914683  
57247, 25398, 365.9521, 0.914528  
57248, 25346, 365.8902, 0.914373  
57249, 25560, 365.8283, 0.914219  
57250, 26084, 365.7663, 0.914064  
57251, 26566, 365.7044, 0.913909  
57252, 26590, 365.6425, 0.913754  
57253, 26138, 365.5806, 0.913600  
57254, 25616, 365.5186, 0.913445  
57255, 25412, 365.4567, 0.913290  
57256, 25502, 365.3948, 0.913135  
57257, 25570, 365.3329, 0.912981  
57258, 25426, 365.2709, 0.912826  
57259, 25278, 365.2090, 0.912671  
57260, 25440, 365.1471, 0.912516  
57261, 25866, 365.0851, 0.912362  
57262, 26084, 365.0232, 0.912207

57263, 25644, 364.9613, 0.912052  
57264, 24636, 364.8994, 0.911897  
57265, 23652, 364.8374, 0.911743  
57266, 23232, 364.7755, 0.911588  
57267, 23366, 364.7136, 0.911433  
57268, 23584, 364.6517, 0.911278  
57269, 23524, 364.5897, 0.911124  
57270, 23328, 364.5278, 0.910969  
57271, 23438, 364.4659, 0.910814  
57272, 24058, 364.4039, 0.910659  
57273, 24858, 364.3420, 0.910505  
57274, 25304, 364.2801, 0.910350  
57275, 25176, 364.2182, 0.910195  
57276, 24774, 364.1562, 0.910040  
57277, 24576, 364.0943, 0.909885  
57278, 24780, 364.0324, 0.909731  
57279, 25194, 363.9705, 0.909576  
57280, 25526, 363.9085, 0.909421  
57281, 25700, 363.8466, 0.909266  
57282, 25872, 363.7847, 0.909112  
57283, 26168, 363.7228, 0.908957  
57284, 26558, 363.6608, 0.908802  
57285, 26920, 363.5989, 0.908647  
57286, 27242, 363.5370, 0.908493  
57287, 27594, 363.4750, 0.908338  
57288, 27972, 363.4131, 0.908183  
57289, 28204, 363.3512, 0.908028  
57290, 28102, 363.2893, 0.907874  
57291, 27710, 363.2273, 0.907719  
57292, 27318, 363.1654, 0.907564  
57293, 27220, 363.1035, 0.907409  
57294, 27450, 363.0416, 0.907255  
57295, 27778, 362.9796, 0.907100  
57296, 27940, 362.9177, 0.906945  
57297, 27892, 362.8558, 0.906790  
57298, 27746, 362.7938, 0.906636  
57299, 27554, 362.7319, 0.906481  
57300, 27244, 362.6700, 0.906326  
57301, 26760, 362.6081, 0.906171  
57302, 26172, 362.5461, 0.906017  
57303, 25688, 362.4842, 0.905862  
57304, 25434, 362.4223, 0.905707  
57305, 25312, 362.3604, 0.905552  
57306, 25142, 362.2984, 0.905398  
57307, 24856, 362.2365, 0.905243  
57308, 24546, 362.1746, 0.905088  
57309, 24308, 362.1127, 0.904933  
57310, 24086, 362.0507, 0.904778  
57311, 23768, 361.9888, 0.904624  
57312, 23400, 361.9269, 0.904469  
57313, 23268, 361.8649, 0.904314  
57314, 23630, 361.8030, 0.904159  
57315, 24410, 361.7411, 0.904005  
57316, 25176, 361.6792, 0.903850  
57317, 25520, 361.6172, 0.903695  
57318, 25436, 361.5553, 0.903540  
57319, 25278, 361.4934, 0.903386  
57320, 25364, 361.4315, 0.903231  
57321, 25594, 361.3695, 0.903076  
57322, 25592, 361.3076, 0.902921  
57323, 25138, 361.2457, 0.902767  
57324, 24492, 361.1837, 0.902612  
57325, 24172, 361.1218, 0.902457  
57326, 24454, 361.0599, 0.902302  
57327, 25110, 360.9980, 0.902148  
57328, 25630, 360.9360, 0.901993  
57329, 25736, 360.8741, 0.901838  
57330, 25568, 360.8122, 0.901683  
57331, 25468, 360.7503, 0.901529  
57332, 25592, 360.6883, 0.901374  
57333, 25782, 360.6264, 0.901219  
57334, 25776, 360.5645, 0.901064  
57335, 25496, 360.5026, 0.900910  
57336, 25098, 360.4406, 0.900755  
57337, 24766, 360.3787, 0.900600  
57338, 24576, 360.3168, 0.900445

57339, 24482, 360.2548, 0.900291  
57340, 24418, 360.1929, 0.900136  
57341, 24364, 360.1310, 0.899981  
57342, 24248, 360.0691, 0.899826  
57343, 23986, 360.0071, 0.899671  
57344, 23572, 359.9452, 0.899517  
57345, 23162, 359.8833, 0.899362  
57346, 22972, 359.8214, 0.899207  
57347, 23056, 359.7594, 0.899052  
57348, 23196, 359.6975, 0.898898  
57349, 23110, 359.6356, 0.898743  
57350, 22772, 359.5736, 0.898588  
57351, 22522, 359.5117, 0.898433  
57352, 22782, 359.4498, 0.898279  
57353, 23664, 359.3879, 0.898124  
57354, 24820, 359.3259, 0.897969  
57355, 25722, 359.2640, 0.897814  
57356, 26072, 359.2021, 0.897660  
57357, 25962, 359.1402, 0.897505  
57358, 25688, 359.0783, 0.897350  
57359, 25480, 359.0163, 0.897195  
57360, 25412, 358.9544, 0.897041  
57361, 25500, 358.8925, 0.896886  
57362, 25754, 358.8305, 0.896731  
57363, 26118, 358.7686, 0.896576  
57364, 26398, 358.7067, 0.896422  
57365, 26368, 358.6447, 0.896267  
57366, 26016, 358.5828, 0.896112  
57367, 25622, 358.5209, 0.895957  
57368, 25546, 358.4590, 0.895803  
57369, 25884, 358.3970, 0.895648  
57370, 26350, 358.3351, 0.895493  
57371, 26560, 358.2732, 0.895338  
57372, 26356, 358.2113, 0.895183  
57373, 25924, 358.1493, 0.895029  
57374, 25540, 358.0874, 0.894874  
57375, 25286, 358.0255, 0.894719  
57376, 25066, 357.9636, 0.894564  
57377, 24830, 357.9016, 0.894410  
57378, 24722, 357.8397, 0.894255  
57379, 24906, 357.7778, 0.894100  
57380, 25324, 357.7158, 0.893945  
57381, 25640, 357.6539, 0.893791  
57382, 25534, 357.5920, 0.893636  
57383, 25000, 357.5301, 0.893481  
57384, 24348, 357.4681, 0.893326  
57385, 23896, 357.4062, 0.893172  
57386, 23680, 357.3443, 0.893017  
57387, 23528, 357.2824, 0.892862  
57388, 23306, 357.2204, 0.892707  
57389, 23104, 357.1585, 0.892553  
57390, 23074, 357.0966, 0.892398  
57391, 23198, 357.0346, 0.892243  
57392, 23304, 356.9727, 0.892088  
57393, 23270, 356.9108, 0.891934  
57394, 23212, 356.8489, 0.891779  
57395, 23364, 356.7869, 0.891624  
57396, 23764, 356.7250, 0.891469  
57397, 24204, 356.6631, 0.891315  
57398, 24442, 356.6012, 0.891160  
57399, 24556, 356.5392, 0.891005  
57400, 24920, 356.4773, 0.890850  
57401, 25782, 356.4154, 0.890696  
57402, 26928, 356.3535, 0.890541  
57403, 27804, 356.2915, 0.890386  
57404, 28004, 356.2296, 0.890231  
57405, 27670, 356.1677, 0.890076  
57406, 27332, 356.1057, 0.889922  
57407, 27386, 356.0438, 0.889767  
57408, 27768, 355.9819, 0.889612  
57409, 28108, 355.9200, 0.889457  
57410, 28152, 355.8580, 0.889303  
57411, 27964, 355.7961, 0.889148  
57412, 27752, 355.7342, 0.888993  
57413, 27536, 355.6723, 0.888838  
57414, 27152, 355.6103, 0.888684

57415, 26566, 355.5484, 0.888529  
57416, 26064, 355.4865, 0.888374  
57417, 26042, 355.4245, 0.888219  
57418, 26606, 355.3626, 0.888065  
57419, 27396, 355.3007, 0.887910  
57420, 27882, 355.2388, 0.887755  
57421, 27822, 355.1768, 0.887600  
57422, 27434, 355.1149, 0.887446  
57423, 27112, 355.0530, 0.887291  
57424, 27022, 354.9911, 0.887136  
57425, 27038, 354.9291, 0.886981  
57426, 27004, 354.8672, 0.886827  
57427, 26962, 354.8053, 0.886672  
57428, 27072, 354.7434, 0.886517  
57429, 27338, 354.6814, 0.886362  
57430, 27542, 354.6195, 0.886208  
57431, 27486, 354.5576, 0.886053  
57432, 27268, 354.4956, 0.885898  
57433, 27292, 354.4337, 0.885743  
57434, 27858, 354.3718, 0.885589  
57435, 28852, 354.3099, 0.885434  
57436, 29794, 354.2479, 0.885279  
57437, 30248, 354.1860, 0.885124  
57438, 30144, 354.1241, 0.884969  
57439, 29760, 354.0622, 0.884815  
57440, 29370, 354.0002, 0.884660  
57441, 29054, 353.9383, 0.884505  
57442, 28708, 353.8764, 0.884350  
57443, 28274, 353.8144, 0.884196  
57444, 27764, 353.7525, 0.884041  
57445, 27144, 353.6906, 0.883886  
57446, 26288, 353.6287, 0.883731  
57447, 25108, 353.5667, 0.883577  
57448, 23778, 353.5048, 0.883422  
57449, 22704, 353.4429, 0.883267  
57450, 22250, 353.3810, 0.883112  
57451, 22400, 353.3190, 0.882958  
57452, 22774, 353.2571, 0.882803  
57453, 22936, 353.1952, 0.882648  
57454, 22766, 353.1333, 0.882493  
57455, 22470, 353.0713, 0.882339  
57456, 22334, 353.0094, 0.882184  
57457, 22452, 352.9475, 0.882029  
57458, 22718, 352.8855, 0.881874  
57459, 23008, 352.8236, 0.881720  
57460, 23294, 352.7617, 0.881565  
57461, 23596, 352.6998, 0.881410  
57462, 23856, 352.6378, 0.881255  
57463, 23938, 352.5759, 0.881101  
57464, 23786, 352.5140, 0.880946  
57465, 23510, 352.4521, 0.880791  
57466, 23300, 352.3901, 0.880636  
57467, 23282, 352.3282, 0.880482  
57468, 23422, 352.2663, 0.880327  
57469, 23640, 352.2043, 0.880172  
57470, 23920, 352.1424, 0.880017  
57471, 24272, 352.0805, 0.879862  
57472, 24600, 352.0186, 0.879708  
57473, 24678, 351.9566, 0.879553  
57474, 24300, 351.8947, 0.879398  
57475, 23526, 351.8328, 0.879243  
57476, 22676, 351.7709, 0.879089  
57477, 22144, 351.7089, 0.878934  
57478, 22088, 351.6470, 0.878779  
57479, 22390, 351.5851, 0.878624  
57480, 22816, 351.5232, 0.878470  
57481, 23232, 351.4612, 0.878315  
57482, 23654, 351.3993, 0.878160  
57483, 24102, 351.3374, 0.878005  
57484, 24516, 351.2754, 0.877851  
57485, 24768, 351.2135, 0.877696  
57486, 24760, 351.1516, 0.877541  
57487, 24500, 351.0897, 0.877386  
57488, 24096, 351.0277, 0.877232  
57489, 23700, 350.9658, 0.877077  
57490, 23522, 350.9039, 0.876922

57491, 23790, 350.8420, 0.876767  
57492, 24590, 350.7800, 0.876613  
57493, 25728, 350.7181, 0.876458  
57494, 26732, 350.6562, 0.876303  
57495, 27180, 350.5942, 0.876148  
57496, 27016, 350.5323, 0.875994  
57497, 26602, 350.4704, 0.875839  
57498, 26384, 350.4085, 0.875684  
57499, 26450, 350.3465, 0.875529  
57500, 26452, 350.2846, 0.875375  
57501, 25964, 350.2227, 0.875220  
57502, 24926, 350.1608, 0.875065  
57503, 23750, 350.0988, 0.874910  
57504, 22964, 350.0369, 0.874755  
57505, 22756, 349.9750, 0.874601  
57506, 22902, 349.9131, 0.874446  
57507, 23018, 349.8511, 0.874291  
57508, 22952, 349.7892, 0.874136  
57509, 22832, 349.7273, 0.873982  
57510, 22816, 349.6653, 0.873827  
57511, 22884, 349.6034, 0.873672  
57512, 22846, 349.5415, 0.873517  
57513, 22620, 349.4796, 0.873363  
57514, 22268, 349.4176, 0.873208  
57515, 22072, 349.3557, 0.873053  
57516, 22158, 349.2938, 0.872898  
57517, 22454, 349.2319, 0.872744  
57518, 22766, 349.1699, 0.872589  
57519, 22940, 349.1080, 0.872434  
57520, 22948, 349.0461, 0.872279  
57521, 22868, 348.9841, 0.872125  
57522, 22840, 348.9222, 0.871970  
57523, 23028, 348.8603, 0.871815  
57524, 23570, 348.7984, 0.871660  
57525, 24448, 348.7364, 0.871506  
57526, 25430, 348.6745, 0.871351  
57527, 26174, 348.6126, 0.871196  
57528, 26458, 348.5507, 0.871041  
57529, 26366, 348.4887, 0.870887  
57530, 26206, 348.4268, 0.870732  
57531, 26234, 348.3649, 0.870577  
57532, 26474, 348.3030, 0.870422  
57533, 26770, 348.2410, 0.870268  
57534, 27018, 348.1791, 0.870113  
57535, 27280, 348.1172, 0.869958  
57536, 27654, 348.0552, 0.869803  
57537, 28118, 347.9933, 0.869648  
57538, 28470, 347.9314, 0.869494  
57539, 28542, 347.8695, 0.869339  
57540, 28372, 347.8075, 0.869184  
57541, 28172, 347.7456, 0.869029  
57542, 28100, 347.6837, 0.868875  
57543, 28114, 347.6218, 0.868720  
57544, 28052, 347.5598, 0.868565  
57545, 27852, 347.4979, 0.868410  
57546, 27622, 347.4360, 0.868256  
57547, 27494, 347.3740, 0.868101  
57548, 27410, 347.3121, 0.867946  
57549, 27154, 347.2502, 0.867791  
57550, 26598, 347.1883, 0.867637  
57551, 25884, 347.1263, 0.867482  
57552, 25368, 347.0644, 0.867327  
57553, 25322, 347.0025, 0.867172  
57554, 25652, 346.9406, 0.867018  
57555, 26032, 346.8786, 0.866863  
57556, 26146, 346.8167, 0.866708  
57557, 25946, 346.7548, 0.866553  
57558, 25622, 346.6929, 0.866399  
57559, 25422, 346.6309, 0.866244  
57560, 25448, 346.5690, 0.866089  
57561, 25654, 346.5071, 0.865934  
57562, 25892, 346.4451, 0.865780  
57563, 26032, 346.3832, 0.865625  
57564, 26012, 346.3213, 0.865470  
57565, 25922, 346.2594, 0.865315  
57566, 26008, 346.1974, 0.865161

57567, 26526, 346.1355, 0.865006  
57568, 27496, 346.0736, 0.864851  
57569, 28600, 346.0117, 0.864696  
57570, 29344, 345.9497, 0.864541  
57571, 29428, 345.8878, 0.864387  
57572, 29002, 345.8259, 0.864232  
57573, 28496, 345.7640, 0.864077  
57574, 28204, 345.7020, 0.863922  
57575, 28050, 345.6401, 0.863768  
57576, 27728, 345.5782, 0.863613  
57577, 27146, 345.5162, 0.863458  
57578, 26592, 345.4543, 0.863303  
57579, 26472, 345.3924, 0.863149  
57580, 26864, 345.3305, 0.862994  
57581, 27368, 345.2685, 0.862839  
57582, 27428, 345.2066, 0.862684  
57583, 26814, 345.1447, 0.862530  
57584, 25774, 345.0828, 0.862375  
57585, 24746, 345.0208, 0.862220  
57586, 23974, 344.9589, 0.862065  
57587, 23452, 344.8970, 0.861911  
57588, 23142, 344.8350, 0.861756  
57589, 23198, 344.7731, 0.861601  
57590, 23828, 344.7112, 0.861446  
57591, 25000, 344.6493, 0.861292  
57592, 26320, 344.5873, 0.861137  
57593, 27290, 344.5254, 0.860982  
57594, 27718, 344.4635, 0.860827  
57595, 27812, 344.4016, 0.860673  
57596, 27936, 344.3396, 0.860518  
57597, 28252, 344.2777, 0.860363  
57598, 28624, 344.2158, 0.860208  
57599, 28876, 344.1539, 0.860054  
57600, 28980, 344.0919, 0.859899  
57601, 29042, 344.0300, 0.859744  
57602, 29124, 343.9681, 0.859589  
57603, 29132, 343.9061, 0.859434  
57604, 28908, 343.8442, 0.859280  
57605, 28442, 343.7823, 0.859125  
57606, 27850, 343.7204, 0.858970  
57607, 27266, 343.6584, 0.858815  
57608, 26684, 343.5965, 0.858661  
57609, 26094, 343.5346, 0.858506  
57610, 25600, 343.4727, 0.858351  
57611, 25438, 343.4107, 0.858196  
57612, 25744, 343.3488, 0.858042  
57613, 26366, 343.2869, 0.857887  
57614, 26926, 343.2249, 0.857732  
57615, 27124, 343.1630, 0.857577  
57616, 26986, 343.1011, 0.857423  
57617, 26746, 343.0392, 0.857268  
57618, 26582, 342.9772, 0.857113  
57619, 26434, 342.9153, 0.856958  
57620, 26156, 342.8534, 0.856804  
57621, 25784, 342.7915, 0.856649  
57622, 25558, 342.7295, 0.856494  
57623, 25680, 342.6676, 0.856339  
57624, 26062, 342.6057, 0.856185  
57625, 26352, 342.5438, 0.856030  
57626, 26270, 342.4818, 0.855875  
57627, 25850, 342.4199, 0.855720  
57628, 25442, 342.3580, 0.855566  
57629, 25330, 342.2960, 0.855411  
57630, 25544, 342.2341, 0.855256  
57631, 25860, 342.1722, 0.855101  
57632, 26082, 342.1103, 0.854947  
57633, 26188, 342.0483, 0.854792  
57634, 26298, 341.9864, 0.854637  
57635, 26522, 341.9245, 0.854482  
57636, 26860, 341.8626, 0.854327  
57637, 27278, 341.8006, 0.854173  
57638, 27678, 341.7387, 0.854018  
57639, 27938, 341.6768, 0.853863  
57640, 27928, 341.6148, 0.853708  
57641, 27602, 341.5529, 0.853554  
57642, 27150, 341.4910, 0.853399

57643, 26910, 341.4291, 0.853244  
57644, 27156, 341.3671, 0.853089  
57645, 27788, 341.3052, 0.852935  
57646, 28398, 341.2433, 0.852780  
57647, 28596, 341.1814, 0.852625  
57648, 28334, 341.1194, 0.852470  
57649, 27898, 341.0575, 0.852316  
57650, 27600, 340.9956, 0.852161  
57651, 27484, 340.9337, 0.852006  
57652, 27358, 340.8717, 0.851851  
57653, 27058, 340.8098, 0.851697  
57654, 26662, 340.7479, 0.851542  
57655, 26376, 340.6859, 0.851387  
57656, 26270, 340.6240, 0.851232  
57657, 26210, 340.5621, 0.851078  
57658, 26028, 340.5002, 0.850923  
57659, 25774, 340.4382, 0.850768  
57660, 25672, 340.3763, 0.850613  
57661, 25868, 340.3144, 0.850459  
57662, 26224, 340.2525, 0.850304  
57663, 26410, 340.1905, 0.850149  
57664, 26210, 340.1286, 0.849994  
57665, 25696, 340.0667, 0.849839  
57666, 25154, 340.0047, 0.849685  
57667, 24792, 339.9428, 0.849530  
57668, 24636, 339.8809, 0.849375  
57669, 24612, 339.8190, 0.849220  
57670, 24698, 339.7570, 0.849066  
57671, 24912, 339.6951, 0.848911  
57672, 25172, 339.6332, 0.848756  
57673, 25292, 339.5713, 0.848601  
57674, 25166, 339.5093, 0.848447  
57675, 24930, 339.4474, 0.848292  
57676, 24904, 339.3855, 0.848137  
57677, 25330, 339.3236, 0.847982  
57678, 26084, 339.2616, 0.847828  
57679, 26796, 339.1997, 0.847673  
57680, 27168, 339.1378, 0.847518  
57681, 27220, 339.0758, 0.847363  
57682, 27176, 339.0139, 0.847209  
57683, 27208, 338.9520, 0.847054  
57684, 27244, 338.8901, 0.846899  
57685, 27138, 338.8281, 0.846744  
57686, 26848, 338.7662, 0.846590  
57687, 26464, 338.7043, 0.846435  
57688, 26034, 338.6424, 0.846280  
57689, 25452, 338.5804, 0.846125  
57690, 24604, 338.5185, 0.845971  
57691, 23634, 338.4566, 0.845816  
57692, 22968, 338.3946, 0.845661  
57693, 23036, 338.3327, 0.845506  
57694, 23830, 338.2708, 0.845352  
57695, 24904, 338.2089, 0.845197  
57696, 25694, 338.1469, 0.845042  
57697, 25972, 338.0850, 0.844887  
57698, 25958, 338.0231, 0.844732  
57699, 26022, 337.9612, 0.844578  
57700, 26316, 337.8992, 0.844423  
57701, 26684, 337.8373, 0.844268  
57702, 26878, 337.7754, 0.844113  
57703, 26772, 337.7135, 0.843959  
57704, 26420, 337.6515, 0.843804  
57705, 25958, 337.5896, 0.843649  
57706, 25506, 337.5277, 0.843494  
57707, 25182, 337.4657, 0.843340  
57708, 25114, 337.4038, 0.843185  
57709, 25332, 337.3419, 0.843030  
57710, 25700, 337.2800, 0.842875  
57711, 25978, 337.2180, 0.842721  
57712, 26058, 337.1561, 0.842566  
57713, 26104, 337.0942, 0.842411  
57714, 26398, 337.0323, 0.842256  
57715, 27026, 336.9703, 0.842102  
57716, 27758, 336.9084, 0.841947  
57717, 28232, 336.8465, 0.841792  
57718, 28312, 336.7845, 0.841637

57719, 28198, 336.7226, 0.841483  
57720, 28158, 336.6607, 0.841328  
57721, 28218, 336.5988, 0.841173  
57722, 28124, 336.5368, 0.841018  
57723, 27670, 336.4749, 0.840864  
57724, 27020, 336.4130, 0.840709  
57725, 26592, 336.3511, 0.840554  
57726, 26650, 336.2891, 0.840399  
57727, 27008, 336.2272, 0.840245  
57728, 27172, 336.1653, 0.840090  
57729, 26838, 336.1034, 0.839935  
57730, 26164, 335.9988, 0.839780  
57731, 25636, 335.9795, 0.839625  
57732, 25632, 335.9176, 0.839471  
57733, 26140, 335.8556, 0.839316  
57734, 26878, 335.7937, 0.839161  
57735, 27568, 335.7318, 0.839006  
57736, 28108, 335.6699, 0.838852  
57737, 28482, 335.6079, 0.838697  
57738, 28682, 335.5460, 0.838542  
57739, 28672, 335.4841, 0.838387  
57740, 28540, 335.4222, 0.838233  
57741, 28464, 335.3602, 0.838078  
57742, 28536, 335.2983, 0.837923  
57743, 28636, 335.2364, 0.837768  
57744, 28522, 335.1744, 0.837614  
57745, 28076, 335.1125, 0.837459  
57746, 27460, 335.0506, 0.837304  
57747, 26944, 334.9887, 0.837149  
57748, 26638, 334.9267, 0.836995  
57749, 26414, 334.8648, 0.836840  
57750, 26104, 334.8029, 0.836685  
57751, 25754, 334.7410, 0.836530  
57752, 25624, 334.6790, 0.836376  
57753, 25884, 334.6171, 0.836221  
57754, 26388, 334.5552, 0.836066  
57755, 26762, 334.4933, 0.835911  
57756, 26748, 334.4313, 0.835757  
57757, 26430, 334.3694, 0.835602  
57758, 26142, 334.3075, 0.835447  
57759, 26144, 334.2455, 0.835292  
57760, 26424, 334.1836, 0.835138  
57761, 26766, 334.1217, 0.834983  
57762, 27004, 334.0598, 0.834828  
57763, 27112, 333.9978, 0.834673  
57764, 27134, 333.9359, 0.834518  
57765, 27078, 333.8740, 0.834364  
57766, 26930, 333.8121, 0.834209  
57767, 26710, 333.7501, 0.834054  
57768, 26484, 333.6882, 0.833899  
57769, 26250, 333.6263, 0.833745  
57770, 25872, 333.5643, 0.833590  
57771, 25220, 333.5024, 0.833435  
57772, 24382, 333.4405, 0.833280  
57773, 23678, 333.3786, 0.833126  
57774, 23444, 333.3166, 0.832971  
57775, 23726, 333.2547, 0.832816  
57776, 24242, 333.1928, 0.832661  
57777, 24636, 333.1309, 0.832507  
57778, 24750, 333.0689, 0.832352  
57779, 24696, 333.0070, 0.832197  
57780, 24616, 332.9451, 0.832042  
57781, 24516, 332.8832, 0.831888  
57782, 24342, 332.8212, 0.831733  
57783, 24134, 332.7593, 0.831578  
57784, 24066, 332.6974, 0.831423  
57785, 24270, 332.6354, 0.831269  
57786, 24642, 332.5735, 0.831114  
57787, 24932, 332.5116, 0.830959  
57788, 25004, 332.4497, 0.830804  
57789, 25032, 332.3877, 0.830650  
57790, 25306, 332.3258, 0.830495  
57791, 25882, 332.2639, 0.830340  
57792, 26456, 332.2020, 0.830185  
57793, 26656, 332.1400, 0.830031  
57794, 26406, 332.0781, 0.829876

57795, 26052, 332.0162, 0.829721  
57796, 25994, 331.9543, 0.829566  
57797, 26322, 331.8923, 0.829411  
57798, 26752, 331.8304, 0.829257  
57799, 26940, 331.7685, 0.829102  
57800, 26824, 331.7065, 0.828947  
57801, 26606, 331.6446, 0.828792  
57802, 26514, 331.5827, 0.828638  
57803, 26580, 331.5208, 0.828483  
57804, 26720, 331.4588, 0.828328  
57805, 26940, 331.3969, 0.828173  
57806, 27296, 331.3350, 0.828019  
57807, 27770, 331.2731, 0.827864  
57808, 28120, 331.2111, 0.827709  
57809, 28082, 331.1492, 0.827554  
57810, 27660, 331.0873, 0.827400  
57811, 27194, 331.0253, 0.827245  
57812, 27032, 330.9634, 0.827090  
57813, 27160, 330.9015, 0.826935  
57814, 27190, 330.8396, 0.826781  
57815, 26772, 330.7776, 0.826626  
57816, 25996, 330.7157, 0.826471  
57817, 25334, 330.6538, 0.826316  
57818, 25190, 330.5919, 0.826162  
57819, 25508, 330.5299, 0.826007  
57820, 25884, 330.4680, 0.825852  
57821, 26020, 330.4061, 0.825697  
57822, 26052, 330.3442, 0.825543  
57823, 26334, 330.2822, 0.825388  
57824, 27004, 330.2203, 0.825233  
57825, 27760, 330.1584, 0.825078  
57826, 28142, 330.0964, 0.824924  
57827, 27992, 330.0345, 0.824769  
57828, 27580, 329.9726, 0.824614  
57829, 27328, 329.9107, 0.824459  
57830, 27388, 329.8487, 0.824304  
57831, 27550, 329.7868, 0.824150  
57832, 27526, 329.7249, 0.823995  
57833, 27208, 329.6630, 0.823840  
57834, 26726, 329.6010, 0.823685  
57835, 26240, 329.5391, 0.823531  
57836, 25808, 329.4772, 0.823376  
57837, 25484, 329.4152, 0.823221  
57838, 25464, 329.3533, 0.823066  
57839, 26036, 329.2914, 0.822912  
57840, 27310, 329.2295, 0.822757  
57841, 29002, 329.1675, 0.822602  
57842, 30514, 329.1056, 0.822447  
57843, 31272, 329.0437, 0.822293  
57844, 31094, 328.9818, 0.822138  
57845, 30270, 328.9198, 0.821983  
57846, 29386, 328.8579, 0.821828  
57847, 28954, 328.7960, 0.821674  
57848, 29134, 328.7341, 0.821519  
57849, 29652, 328.6721, 0.821364  
57850, 29924, 328.6102, 0.821209  
57851, 29438, 328.5483, 0.821055  
57852, 28126, 328.4863, 0.820900  
57853, 26474, 328.4244, 0.820745  
57854, 25218, 328.3625, 0.820590  
57855, 24796, 328.3006, 0.820436  
57856, 25064, 328.2386, 0.820281  
57857, 25476, 328.1767, 0.820126  
57858, 25662, 328.1148, 0.819971  
57859, 25742, 328.0529, 0.819817  
57860, 26104, 327.9909, 0.819662  
57861, 26858, 327.9290, 0.819507  
57862, 27536, 327.8671, 0.819352  
57863, 27474, 327.8051, 0.819197  
57864, 26432, 327.7432, 0.819043  
57865, 24902, 327.6813, 0.818888  
57866, 23694, 327.6194, 0.818733  
57867, 23246, 327.5574, 0.818578  
57868, 23360, 327.4955, 0.818424  
57869, 23548, 327.4336, 0.818269  
57870, 23616, 327.3717, 0.818114

57871, 23812, 327.3097, 0.817959  
57872, 24432, 327.2478, 0.817805  
57873, 25352, 327.1859, 0.817650  
57874, 26036, 327.1240, 0.817495  
57875, 26028, 327.0620, 0.817340  
57876, 25384, 327.0001, 0.817186  
57877, 24598, 326.9382, 0.817031  
57878, 24128, 326.8762, 0.816876  
57879, 24054, 326.8143, 0.816721  
57880, 24168, 326.7524, 0.816567  
57881, 24320, 326.6905, 0.816412  
57882, 24566, 326.6285, 0.816257  
57883, 24998, 326.5666, 0.816102  
57884, 25482, 326.5047, 0.815948  
57885, 25728, 326.4428, 0.815793  
57886, 25588, 326.3808, 0.815638  
57887, 25280, 326.3189, 0.815483  
57888, 25228, 326.2570, 0.815329  
57889, 25676, 326.1950, 0.815174  
57890, 26460, 326.1331, 0.815019  
57891, 27196, 326.0712, 0.814864  
57892, 27610, 326.0093, 0.814710  
57893, 27714, 325.9473, 0.814555  
57894, 27684, 325.8854, 0.814400  
57895, 27658, 325.8235, 0.814245  
57896, 27704, 325.7616, 0.814090  
57897, 27880, 325.6996, 0.813936  
57898, 28268, 325.6377, 0.813781  
57899, 28826, 325.5758, 0.813626  
57900, 29298, 325.5139, 0.813471  
57901, 29340, 325.4519, 0.813317  
57902, 28846, 325.3900, 0.813162  
57903, 28098, 325.3281, 0.813007  
57904, 27568, 325.2661, 0.812852  
57905, 27498, 325.2042, 0.812698  
57906, 27692, 325.1423, 0.812543  
57907, 27712, 325.0804, 0.812388  
57908, 27296, 325.0184, 0.812233  
57909, 26568, 324.9565, 0.812079  
57910, 25864, 324.8946, 0.811924  
57911, 25462, 324.8327, 0.811769  
57912, 25380, 324.7707, 0.811614  
57913, 25504, 324.7088, 0.811460  
57914, 25726, 324.6469, 0.811305  
57915, 26004, 324.5849, 0.811150  
57916, 26280, 324.5230, 0.810995  
57917, 26500, 324.4611, 0.810841  
57918, 26666, 324.3992, 0.810686  
57919, 26872, 324.3372, 0.810531  
57920, 27176, 324.2753, 0.810376  
57921, 27418, 324.2134, 0.810222  
57922, 27292, 324.1515, 0.810067  
57923, 26636, 324.0895, 0.809912  
57924, 25680, 324.0276, 0.809757  
57925, 24938, 323.9657, 0.809603  
57926, 24800, 323.9038, 0.809448  
57927, 25222, 323.8418, 0.809293  
57928, 25794, 323.7799, 0.809138  
57929, 26194, 323.7180, 0.808983  
57930, 26466, 323.6560, 0.808829  
57931, 26878, 323.5941, 0.808674  
57932, 27536, 323.5322, 0.808519  
57933, 28176, 323.4703, 0.808364  
57934, 28430, 323.4083, 0.808210  
57935, 28220, 323.3464, 0.808055  
57936, 27876, 323.2845, 0.807900  
57937, 27798, 323.2226, 0.807745  
57938, 28082, 323.1606, 0.807591  
57939, 28438, 323.0987, 0.807436  
57940, 28546, 323.0368, 0.807281  
57941, 28384, 322.9748, 0.807126  
57942, 28188, 322.9129, 0.806972  
57943, 28142, 322.8510, 0.806817  
57944, 28152, 322.7891, 0.806662  
57945, 27974, 322.7271, 0.806507  
57946, 27524, 322.6652, 0.806353

57947, 27024, 322.6033, 0.806198  
57948, 26778, 322.5414, 0.806043  
57949, 26880, 322.4794, 0.805888  
57950, 27148, 322.4175, 0.805734  
57951, 27334, 322.3556, 0.805579  
57952, 27368, 322.2937, 0.805424  
57953, 27380, 322.2317, 0.805269  
57954, 27482, 322.1698, 0.805115  
57955, 27632, 322.1079, 0.804960  
57956, 27658, 322.0459, 0.804805  
57957, 27462, 321.9840, 0.804650  
57958, 27114, 321.9221, 0.804495  
57959, 26768, 321.8602, 0.804341  
57960, 26578, 321.7982, 0.804186  
57961, 26618, 321.7363, 0.804031  
57962, 26902, 321.6744, 0.803876  
57963, 27382, 321.6125, 0.803722  
57964, 27878, 321.5505, 0.803567  
57965, 28176, 321.4886, 0.803412  
57966, 28142, 321.4267, 0.803257  
57967, 27890, 321.3647, 0.803103  
57968, 27720, 321.3028, 0.802948  
57969, 27856, 321.2409, 0.802793  
57970, 28228, 321.1790, 0.802638  
57971, 28556, 321.1170, 0.802484  
57972, 28612, 321.0551, 0.802329  
57973, 28428, 320.9932, 0.802174  
57974, 28174, 320.9313, 0.802019  
57975, 27926, 320.8693, 0.801865  
57976, 27562, 320.8074, 0.801710  
57977, 26984, 320.7455, 0.801555  
57978, 26380, 320.6836, 0.801400  
57979, 26160, 320.6216, 0.801246  
57980, 26600, 320.5597, 0.801091  
57981, 27544, 320.4978, 0.800936  
57982, 28522, 320.4358, 0.800781  
57983, 29176, 320.3739, 0.800627  
57984, 29542, 320.3120, 0.800472  
57985, 29864, 320.2501, 0.800317  
57986, 30192, 320.1881, 0.800162  
57987, 30224, 320.1262, 0.800008  
57988, 29622, 320.0643, 0.799853  
57989, 28444, 320.0024, 0.799698  
57990, 27238, 319.9404, 0.799543  
57991, 26578, 319.8785, 0.799388  
57992, 26582, 319.8166, 0.799234  
57993, 26892, 319.7546, 0.799079  
57994, 27068, 319.6927, 0.798924  
57995, 27026, 319.6308, 0.798769  
57996, 26980, 319.5689, 0.798615  
57997, 27090, 319.5069, 0.798460  
57998, 27254, 319.4450, 0.798305  
57999, 27298, 319.3831, 0.798150  
58000, 27318, 319.3212, 0.797996  
58001, 27708, 319.2592, 0.797841  
58002, 28700, 319.1973, 0.797686  
58003, 30022, 319.1354, 0.797531  
58004, 30934, 319.0735, 0.797377  
58005, 30860, 319.0115, 0.797222  
58006, 29906, 318.9496, 0.797067  
58007, 28754, 318.8877, 0.796912  
58008, 28070, 318.8257, 0.796758  
58009, 27944, 318.7638, 0.796603  
58010, 27920, 318.7019, 0.796448  
58011, 27528, 318.6400, 0.796293  
58012, 26730, 318.5780, 0.796139  
58013, 25908, 318.5161, 0.795984  
58014, 25454, 318.4542, 0.795829  
58015, 25460, 318.3923, 0.795674  
58016, 25722, 318.3303, 0.795520  
58017, 26020, 318.2684, 0.795365  
58018, 26296, 318.2065, 0.795210  
58019, 26580, 318.1446, 0.795055  
58020, 26844, 318.0826, 0.794901  
58021, 26960, 318.0207, 0.794746  
58022, 26816, 317.9588, 0.794591

58023, 26424, 317.8968, 0.794436  
58024, 25946, 317.8349, 0.794281  
58025, 25616, 317.7730, 0.794127  
58026, 25634, 317.7111, 0.793972  
58027, 26096, 317.6491, 0.793817  
58028, 26936, 317.5872, 0.793662  
58029, 27904, 317.5253, 0.793508  
58030, 28654, 317.4634, 0.793353  
58031, 28980, 317.4014, 0.793198  
58032, 28956, 317.3395, 0.793043  
58033, 28906, 317.2776, 0.792889  
58034, 29130, 317.2156, 0.792734  
58035, 29636, 317.1537, 0.792579  
58036, 30160, 317.0918, 0.792424  
58037, 30366, 317.0299, 0.792270  
58038, 30174, 316.9679, 0.792115  
58039, 29748, 316.9060, 0.791960  
58040, 29328, 316.8441, 0.791805  
58041, 29042, 316.7822, 0.791651  
58042, 28906, 316.7202, 0.791496  
58043, 28922, 316.6583, 0.791341  
58044, 29092, 316.5964, 0.791186  
58045, 29372, 316.5345, 0.791032  
58046, 29590, 316.4725, 0.790877  
58047, 29568, 316.4106, 0.790722  
58048, 29328, 316.3487, 0.790567  
58049, 29080, 316.2867, 0.790413  
58050, 29038, 316.2248, 0.790258  
58051, 29164, 316.1629, 0.790103  
58052, 29182, 316.1010, 0.789948  
58053, 28892, 316.0390, 0.789794  
58054, 28382, 315.9771, 0.789639  
58055, 27934, 315.9152, 0.789484  
58056, 27680, 315.8533, 0.789329  
58057, 27410, 315.7913, 0.789174  
58058, 26798, 315.7294, 0.789020  
58059, 25828, 315.6675, 0.788865  
58060, 24950, 315.6055, 0.788710  
58061, 24718, 315.5436, 0.788555  
58062, 25286, 315.4817, 0.788401  
58063, 26224, 315.4198, 0.788246  
58064, 26914, 315.3578, 0.788091  
58065, 27066, 315.2959, 0.787936  
58066, 26906, 315.2340, 0.787782  
58067, 26848, 315.1721, 0.787627  
58068, 27080, 315.1101, 0.787472  
58069, 27454, 315.0482, 0.787317  
58070, 27758, 314.9863, 0.787163  
58071, 27980, 314.9244, 0.787008  
58072, 28266, 314.8624, 0.786853  
58073, 28676, 314.8005, 0.786698  
58074, 29046, 314.7386, 0.786544  
58075, 29130, 314.6766, 0.786389  
58076, 28884, 314.6147, 0.786234  
58077, 28518, 314.5528, 0.786079  
58078, 28288, 314.4909, 0.785925  
58079, 28280, 314.4289, 0.785770  
58080, 28386, 314.3670, 0.785615  
58081, 28470, 314.3051, 0.785460  
58082, 28494, 314.2432, 0.785306  
58083, 28450, 314.1812, 0.785151  
58084, 28256, 314.1193, 0.784996  
58085, 27798, 314.0574, 0.784841  
58086, 27086, 313.9954, 0.784687  
58087, 26336, 313.9335, 0.784532  
58088, 25802, 313.8716, 0.784377  
58089, 25544, 313.8097, 0.784222  
58090, 25366, 313.7477, 0.784067  
58091, 25066, 313.6858, 0.783913  
58092, 24646, 313.6239, 0.783758  
58093, 24320, 313.5620, 0.783603  
58094, 24250, 313.5000, 0.783448  
58095, 24358, 313.4381, 0.783294  
58096, 24468, 313.3762, 0.783139  
58097, 24558, 313.3143, 0.782984  
58098, 24874, 313.2523, 0.782829

58099, 25642, 313.1904, 0.782675  
58100, 26760, 313.1285, 0.782520  
58101, 27766, 313.0665, 0.782365  
58102, 28248, 313.0046, 0.782210  
58103, 28178, 312.9427, 0.782056  
58104, 27908, 312.8808, 0.781901  
58105, 27764, 312.8188, 0.781746  
58106, 27738, 312.7569, 0.781591  
58107, 27576, 312.6950, 0.781437  
58108, 27170, 312.6331, 0.781282  
58109, 26742, 312.5711, 0.781127  
58110, 26612, 312.5092, 0.780972  
58111, 26808, 312.4473, 0.780818  
58112, 26964, 312.3853, 0.780663  
58113, 26686, 312.3234, 0.780508  
58114, 25982, 312.2615, 0.780353  
58115, 25302, 312.1996, 0.780199  
58116, 25102, 312.1376, 0.780044  
58117, 25422, 312.0757, 0.779889  
58118, 25872, 312.0138, 0.779734  
58119, 26032, 311.9519, 0.779580  
58120, 25842, 311.8899, 0.779425  
58121, 25598, 311.8280, 0.779270  
58122, 25596, 311.7661, 0.779115  
58123, 25884, 311.7042, 0.778960  
58124, 26250, 311.6422, 0.778806  
58125, 26492, 311.5803, 0.778651  
58126, 26534, 311.5184, 0.778496  
58127, 26422, 311.4564, 0.778341  
58128, 26188, 311.3945, 0.778187  
58129, 25852, 311.3326, 0.778032  
58130, 25488, 311.2707, 0.777877  
58131, 25246, 311.2087, 0.777722  
58132, 25236, 311.1468, 0.777568  
58133, 25440, 311.0849, 0.777413  
58134, 25742, 311.0230, 0.777258  
58135, 26082, 310.9610, 0.777103  
58136, 26524, 310.8991, 0.776949  
58137, 27124, 310.8372, 0.776794  
58138, 27770, 310.7752, 0.776639  
58139, 28196, 310.7133, 0.776484  
58140, 28250, 310.6514, 0.776330  
58141, 28034, 310.5895, 0.776175  
58142, 27850, 310.5275, 0.776020  
58143, 27884, 310.4656, 0.775865  
58144, 28002, 310.4037, 0.775711  
58145, 27874, 310.3418, 0.775556  
58146, 27346, 310.2798, 0.775401  
58147, 26620, 310.2179, 0.775246  
58148, 26116, 310.1560, 0.775092  
58149, 26120, 310.0941, 0.774937  
58150, 26544, 310.0321, 0.774782  
58151, 27054, 309.9702, 0.774627  
58152, 27352, 309.9083, 0.774473  
58153, 27344, 309.8463, 0.774318  
58154, 27118, 309.7844, 0.774163  
58155, 26814, 309.7225, 0.774008  
58156, 26542, 309.6606, 0.773853  
58157, 26378, 309.5986, 0.773699  
58158, 26352, 309.5367, 0.773544  
58159, 26388, 309.4748, 0.773389  
58160, 26326, 309.4129, 0.773234  
58161, 26058, 309.3509, 0.773080  
58162, 25658, 309.2890, 0.772925  
58163, 25338, 309.2271, 0.772770  
58164, 25244, 309.1651, 0.772615  
58165, 25286, 309.1032, 0.772461  
58166, 25212, 309.0413, 0.772306  
58167, 24930, 308.9794, 0.772151  
58168, 24684, 308.9174, 0.771996  
58169, 24892, 308.8555, 0.771842  
58170, 25734, 308.7936, 0.771687  
58171, 26890, 308.7317, 0.771532  
58172, 27756, 308.6697, 0.771377  
58173, 27872, 308.6078, 0.771223  
58174, 27306, 308.5459, 0.771068

58175, 26554, 308.4840, 0.770913  
58176, 26142, 308.4220, 0.770758  
58177, 26256, 308.3601, 0.770604  
58178, 26710, 308.2982, 0.770449  
58179, 27138, 308.2362, 0.770294  
58180, 27282, 308.1743, 0.770139  
58181, 27058, 308.1124, 0.769985  
58182, 26584, 308.0505, 0.769830  
58183, 26074, 307.9885, 0.769675  
58184, 25732, 307.9266, 0.769520  
58185, 25624, 307.8647, 0.769366  
58186, 25632, 307.8028, 0.769211  
58187, 25522, 307.7408, 0.769056  
58188, 25198, 307.6789, 0.768901  
58189, 24812, 307.6170, 0.768746  
58190, 24674, 307.5550, 0.768592  
58191, 24962, 307.4931, 0.768437  
58192, 25520, 307.4312, 0.768282  
58193, 25988, 307.3693, 0.768127  
58194, 26142, 307.3073, 0.767973  
58195, 26058, 307.2454, 0.767818  
58196, 25996, 307.1835, 0.767663  
58197, 26048, 307.1216, 0.767508  
58198, 26074, 307.0596, 0.767354  
58199, 25880, 306.9977, 0.767199  
58200, 25552, 306.9358, 0.767044  
58201, 25430, 306.8739, 0.766889  
58202, 25776, 306.8119, 0.766735  
58203, 26436, 306.7500, 0.766580  
58204, 26894, 306.6881, 0.766425  
58205, 26700, 306.6261, 0.766270  
58206, 25864, 306.5642, 0.766116  
58207, 24846, 306.5023, 0.765961  
58208, 24164, 306.4404, 0.765806  
58209, 24042, 306.3784, 0.765651  
58210, 24332, 306.3165, 0.765497  
58211, 24772, 306.2546, 0.765342  
58212, 25158, 306.1927, 0.765187  
58213, 25396, 306.1307, 0.765032  
58214, 25436, 306.0688, 0.764878  
58215, 25284, 306.0069, 0.764723  
58216, 25086, 305.9450, 0.764568  
58217, 25068, 305.8830, 0.764413  
58218, 25350, 305.8211, 0.764259  
58219, 25780, 305.7592, 0.764104  
58220, 26024, 305.6972, 0.763949  
58221, 25910, 305.6353, 0.763794  
58222, 25646, 305.5734, 0.763639  
58223, 25630, 305.5115, 0.763485  
58224, 26050, 305.4495, 0.763330  
58225, 26638, 305.3876, 0.763175  
58226, 26888, 305.3257, 0.763020  
58227, 26550, 305.2638, 0.762866  
58228, 25864, 305.2018, 0.762711  
58229, 25334, 305.1399, 0.762556  
58230, 25268, 305.0780, 0.762401  
58231, 25572, 305.0160, 0.762247  
58232, 25922, 304.9541, 0.762092  
58233, 26140, 304.8922, 0.761937  
58234, 26308, 304.8303, 0.761782  
58235, 26544, 304.7683, 0.761628  
58236, 26830, 304.7064, 0.761473  
58237, 27006, 304.6445, 0.761318  
58238, 27036, 304.5826, 0.761163  
58239, 27102, 304.5206, 0.761009  
58240, 27466, 304.4587, 0.760854  
58241, 28166, 304.3968, 0.760699  
58242, 28926, 304.3349, 0.760544  
58243, 29384, 304.2729, 0.760390  
58244, 29348, 304.2110, 0.760235  
58245, 28916, 304.1491, 0.760080  
58246, 28288, 304.0871, 0.759925  
58247, 27632, 304.0252, 0.759771  
58248, 27042, 303.9633, 0.759616  
58249, 26640, 303.9014, 0.759461  
58250, 26564, 303.8394, 0.759306

58251, 26856, 303.7775, 0.759151  
58252, 27346, 303.7156, 0.758997  
58253, 27742, 303.6537, 0.758842  
58254, 27884, 303.5917, 0.758687  
58255, 27830, 303.5298, 0.758532  
58256, 27738, 303.4679, 0.758378  
58257, 27622, 303.4059, 0.758223  
58258, 27316, 303.3440, 0.758068  
58259, 26690, 303.2821, 0.757913  
58260, 25840, 303.2202, 0.757759  
58261, 25122, 303.1582, 0.757604  
58262, 24838, 303.0963, 0.757449  
58263, 25012, 303.0344, 0.757294  
58264, 25392, 302.9725, 0.757140  
58265, 25670, 302.9105, 0.756985  
58266, 25736, 302.8486, 0.756830  
58267, 25652, 302.7867, 0.756675  
58268, 25526, 302.7248, 0.756521  
58269, 25390, 302.6628, 0.756366  
58270, 25232, 302.6009, 0.756211  
58271, 25064, 302.5390, 0.756056  
58272, 24924, 302.4770, 0.755902  
58273, 24804, 302.4151, 0.755747  
58274, 24694, 302.3532, 0.755592  
58275, 24618, 302.2913, 0.755437  
58276, 24702, 302.2293, 0.755283  
58277, 25058, 302.1674, 0.755128  
58278, 25642, 302.1055, 0.754973  
58279, 26212, 302.0436, 0.754818  
58280, 26550, 301.9816, 0.754664  
58281, 26640, 301.9197, 0.754509  
58282, 26682, 301.8578, 0.754354  
58283, 26828, 301.7958, 0.754199  
58284, 26988, 301.7339, 0.754044  
58285, 26902, 301.6720, 0.753890  
58286, 26434, 301.6101, 0.753735  
58287, 25752, 301.5481, 0.753580  
58288, 25194, 301.4862, 0.753425  
58289, 24926, 301.4243, 0.753271  
58290, 24828, 301.3624, 0.753116  
58291, 24682, 301.3004, 0.752961  
58292, 24494, 301.2385, 0.752806  
58293, 24508, 301.1766, 0.752652  
58294, 24956, 301.1147, 0.752497  
58295, 25754, 301.0527, 0.752342  
58296, 26550, 300.9908, 0.752187  
58297, 27086, 300.9289, 0.752033  
58298, 27390, 300.8669, 0.751878  
58299, 27682, 300.8050, 0.751723  
58300, 28026, 300.7431, 0.751568  
58301, 28216, 300.6812, 0.751414  
58302, 27994, 300.6192, 0.751259  
58303, 27402, 300.5573, 0.751104  
58304, 26828, 300.4954, 0.750949  
58305, 26646, 300.4335, 0.750795  
58306, 26880, 300.3715, 0.750640  
58307, 27218, 300.3096, 0.750485  
58308, 27328, 300.2477, 0.750330  
58309, 27192, 300.1857, 0.750176  
58310, 27014, 300.1238, 0.750021  
58311, 26954, 300.0619, 0.749866  
58312, 26946, 300.0000, 0.749711  
58313, 26842, 299.9380, 0.749557  
58314, 26648, 299.8761, 0.749402  
58315, 26522, 299.8142, 0.749247  
58316, 26576, 299.7523, 0.749092  
58317, 26690, 299.6903, 0.748937  
58318, 26664, 299.6284, 0.748783  
58319, 26494, 299.5665, 0.748628  
58320, 26468, 299.5046, 0.748473  
58321, 26848, 299.4426, 0.748318  
58322, 27530, 299.3807, 0.748164  
58323, 28036, 299.3188, 0.748009  
58324, 27928, 299.2568, 0.747854  
58325, 27256, 299.1949, 0.747699  
58326, 26516, 299.1330, 0.747545

58327, 26194, 299.0711, 0.747390  
58328, 26316, 299.0091, 0.747235  
58329, 26508, 298.9472, 0.747080  
58330, 26430, 298.8853, 0.746926  
58331, 26124, 298.8234, 0.746771  
58332, 25924, 298.7614, 0.746616  
58333, 26042, 298.6995, 0.746461  
58334, 26312, 298.6376, 0.746307  
58335, 26366, 298.5756, 0.746152  
58336, 26016, 298.5137, 0.745997  
58337, 25424, 298.4518, 0.745842  
58338, 24928, 298.3899, 0.745688  
58339, 24706, 298.3279, 0.745533  
58340, 24670, 298.2660, 0.745378  
58341, 24622, 298.2041, 0.745223  
58342, 24486, 298.1422, 0.745069  
58343, 24358, 298.0802, 0.744914  
58344, 24374, 298.0183, 0.744759  
58345, 24614, 297.9564, 0.744604  
58346, 25102, 297.8945, 0.744450  
58347, 25830, 297.8325, 0.744295  
58348, 26724, 297.7706, 0.744140  
58349, 27550, 297.7087, 0.743985  
58350, 27952, 297.6467, 0.743830  
58351, 27678, 297.5848, 0.743676  
58352, 26812, 297.5229, 0.743521  
58353, 25780, 297.4610, 0.743366  
58354, 25084, 297.3990, 0.743211  
58355, 24986, 297.3371, 0.743057  
58356, 25384, 297.2752, 0.742902  
58357, 25984, 297.2133, 0.742747  
58358, 26520, 297.1513, 0.742592  
58359, 26886, 297.0894, 0.742438  
58360, 27094, 297.0275, 0.742283  
58361, 27198, 296.9655, 0.742128  
58362, 27250, 296.9036, 0.741973  
58363, 27264, 296.8417, 0.741819  
58364, 27238, 296.7798, 0.741664  
58365, 27118, 296.7178, 0.741509  
58366, 26910, 296.6559, 0.741354  
58367, 26726, 296.5940, 0.741200  
58368, 26782, 296.5321, 0.741045  
58369, 27180, 296.4701, 0.740890  
58370, 27756, 296.4082, 0.740735  
58371, 28106, 296.3463, 0.740581  
58372, 27916, 296.2844, 0.740426  
58373, 27256, 296.2224, 0.740271  
58374, 26586, 296.1605, 0.740116  
58375, 26376, 296.0986, 0.739962  
58376, 26746, 296.0366, 0.739807  
58377, 27390, 295.9747, 0.739652  
58378, 27902, 295.9128, 0.739497  
58379, 28120, 295.8509, 0.739343  
58380, 28196, 295.7889, 0.739188  
58381, 28304, 295.7270, 0.739033  
58382, 28428, 295.6651, 0.738878  
58383, 28340, 295.6032, 0.738723  
58384, 27872, 295.5412, 0.738569  
58385, 27096, 295.4793, 0.738414  
58386, 26272, 295.4174, 0.738259  
58387, 25666, 295.3554, 0.738104  
58388, 25408, 295.2935, 0.737950  
58389, 25508, 295.2316, 0.737795  
58390, 25880, 295.1697, 0.737640  
58391, 26328, 295.1077, 0.737485  
58392, 26538, 295.0458, 0.737331  
58393, 26256, 294.9839, 0.737176  
58394, 25524, 294.9220, 0.737021  
58395, 24742, 294.8600, 0.736866  
58396, 24400, 294.7981, 0.736712  
58397, 24676, 294.7362, 0.736557  
58398, 25248, 294.6743, 0.736402  
58399, 25614, 294.6123, 0.736247  
58400, 25518, 294.5504, 0.736093  
58401, 25186, 294.4885, 0.735938  
58402, 25048, 294.4265, 0.735783

58403, 25308, 294.3646, 0.735628  
58404, 25800, 294.3027, 0.735474  
58405, 26212, 294.2408, 0.735319  
58406, 26430, 294.1788, 0.735164  
58407, 26566, 294.1169, 0.735009  
58408, 26748, 294.0550, 0.734855  
58409, 26896, 293.9931, 0.734700  
58410, 26824, 293.9311, 0.734545  
58411, 26530, 293.8692, 0.734390  
58412, 26266, 293.8073, 0.734236  
58413, 26316, 293.7453, 0.734081  
58414, 26682, 293.6834, 0.733926  
58415, 27108, 293.6215, 0.733771  
58416, 27338, 293.5596, 0.733616  
58417, 27428, 293.4976, 0.733462  
58418, 27620, 293.4357, 0.733307  
58419, 28010, 293.3738, 0.733152  
58420, 28356, 293.3119, 0.732997  
58421, 28316, 293.2499, 0.732843  
58422, 27836, 293.1880, 0.732688  
58423, 27284, 293.1261, 0.732533  
58424, 27098, 293.0642, 0.732378  
58425, 27386, 293.0022, 0.732224  
58426, 27824, 292.9403, 0.732069  
58427, 28040, 292.8784, 0.731914  
58428, 27972, 292.8164, 0.731759  
58429, 27910, 292.7545, 0.731605  
58430, 28106, 292.6926, 0.731450  
58431, 28478, 292.6307, 0.731295  
58432, 28676, 292.5687, 0.731140  
58433, 28454, 292.5068, 0.730986  
58434, 27898, 292.4449, 0.730831  
58435, 27348, 292.3830, 0.730676  
58436, 27060, 292.3210, 0.730521  
58437, 27038, 292.2591, 0.730367  
58438, 27146, 292.1972, 0.730212  
58439, 27268, 292.1353, 0.730057  
58440, 27384, 292.0733, 0.729902  
58441, 27440, 292.0114, 0.729748  
58442, 27294, 291.9495, 0.729593  
58443, 26846, 291.8875, 0.729438  
58444, 26180, 291.8256, 0.729283  
58445, 25554, 291.7637, 0.729129  
58446, 25226, 291.7018, 0.728974  
58447, 25244, 291.6398, 0.728819  
58448, 25504, 291.5779, 0.728664  
58449, 25908, 291.5160, 0.728509  
58450, 26454, 291.4541, 0.728355  
58451, 27128, 291.3921, 0.728200  
58452, 27804, 291.3302, 0.728045  
58453, 28286, 291.2683, 0.727890  
58454, 28490, 291.2063, 0.727736  
58455, 28560, 291.1444, 0.727581  
58456, 28696, 291.0825, 0.727426  
58457, 28914, 291.0206, 0.727271  
58458, 28974, 290.9586, 0.727117  
58459, 28656, 290.8967, 0.726962  
58460, 28048, 290.8348, 0.726807  
58461, 27562, 290.7729, 0.726652  
58462, 27584, 290.7109, 0.726498  
58463, 28098, 290.6490, 0.726343  
58464, 28704, 290.5871, 0.726188  
58465, 28952, 290.5252, 0.726033  
58466, 28702, 290.4632, 0.725879  
58467, 28148, 290.4013, 0.725724  
58468, 27576, 290.3394, 0.725569  
58469, 27164, 290.2774, 0.725414  
58470, 26970, 290.2155, 0.725260  
58471, 27070, 290.1536, 0.725105  
58472, 27548, 290.0917, 0.724950  
58473, 28328, 290.0297, 0.724795  
58474, 29130, 289.9678, 0.724641  
58475, 29632, 289.9059, 0.724486  
58476, 29780, 289.8440, 0.724331  
58477, 29846, 289.7820, 0.724176  
58478, 30158, 289.7201, 0.724022

58479, 30734, 289.6582, 0.723867  
58480, 31244, 289.5962, 0.723712  
58481, 31336, 289.5343, 0.723557  
58482, 30986, 289.4724, 0.723402  
58483, 30510, 289.4105, 0.723248  
58484, 30206, 289.3485, 0.723093  
58485, 30040, 289.2866, 0.722938  
58486, 29752, 289.2247, 0.722783  
58487, 29174, 289.1628, 0.722629  
58488, 28490, 289.1008, 0.722474  
58489, 28036, 289.0389, 0.722319  
58490, 27950, 288.9770, 0.722164  
58491, 28012, 288.9151, 0.722010  
58492, 27898, 288.8531, 0.721855  
58493, 27516, 288.7912, 0.721700  
58494, 27110, 288.7293, 0.721545  
58495, 27012, 288.6673, 0.721391  
58496, 27294, 288.6054, 0.721236  
58497, 27712, 288.5435, 0.721081  
58498, 27952, 288.4816, 0.720926  
58499, 27836, 288.4196, 0.720772  
58500, 27510, 288.3577, 0.720617  
58501, 27184, 288.2958, 0.720462  
58502, 27032, 288.2339, 0.720307  
58503, 27144, 288.1719, 0.720153  
58504, 27528, 288.1100, 0.719998  
58505, 28074, 288.0481, 0.719843  
58506, 28566, 287.9861, 0.719688  
58507, 28742, 287.9242, 0.719534  
58508, 28512, 287.8623, 0.719379  
58509, 28056, 287.8004, 0.719224  
58510, 27706, 287.7384, 0.719069  
58511, 27652, 287.6765, 0.718915  
58512, 27762, 287.6146, 0.718760  
58513, 27716, 287.5527, 0.718605  
58514, 27314, 287.4907, 0.718450  
58515, 26668, 287.4288, 0.718295  
58516, 26098, 287.3669, 0.718141  
58517, 25872, 287.3050, 0.717986  
58518, 25990, 287.2430, 0.717831  
58519, 26262, 287.1811, 0.717676  
58520, 26454, 287.1192, 0.717522  
58521, 26428, 287.0572, 0.717367  
58522, 26130, 286.9953, 0.717212  
58523, 25548, 286.9334, 0.717057  
58524, 24774, 286.8715, 0.716903  
58525, 24026, 286.8095, 0.716748  
58526, 23552, 286.7476, 0.716593  
58527, 23480, 286.6857, 0.716438  
58528, 23738, 286.6238, 0.716284  
58529, 24166, 286.5618, 0.716129  
58530, 24706, 286.4999, 0.715974  
58531, 25420, 286.4380, 0.715819  
58532, 26334, 286.3760, 0.715665  
58533, 27272, 286.3141, 0.715510  
58534, 27920, 286.2522, 0.715355  
58535, 28100, 286.1903, 0.715200  
58536, 27968, 286.1283, 0.715046  
58537, 27890, 286.0664, 0.714891  
58538, 28072, 286.0045, 0.714736  
58539, 28354, 285.9426, 0.714581  
58540, 28424, 285.8806, 0.714427  
58541, 28150, 285.8187, 0.714272  
58542, 27774, 285.7568, 0.714117  
58543, 27668, 285.6949, 0.713962  
58544, 27956, 285.6329, 0.713807  
58545, 28394, 285.5710, 0.713653  
58546, 28584, 285.5091, 0.713498  
58547, 28366, 285.4471, 0.713343  
58548, 27918, 285.3852, 0.713188  
58549, 27574, 285.3233, 0.713034  
58550, 27516, 285.2614, 0.712879  
58551, 27678, 285.1994, 0.712724  
58552, 27920, 285.1375, 0.712569  
58553, 28176, 285.0756, 0.712415  
58554, 28452, 285.0137, 0.712260

58555, 28732, 284.9517, 0.712105  
58556, 28896, 284.8898, 0.711950  
58557, 28822, 284.8279, 0.711796  
58558, 28520, 284.7659, 0.711641  
58559, 28128, 284.7040, 0.711486  
58560, 27842, 284.6421, 0.711331  
58561, 27786, 284.5802, 0.711177  
58562, 28004, 284.5182, 0.711022  
58563, 28468, 284.4563, 0.710867  
58564, 29048, 284.3944, 0.710712  
58565, 29514, 284.3325, 0.710558  
58566, 29592, 284.2705, 0.710403  
58567, 29144, 284.2086, 0.710248  
58568, 28314, 284.1467, 0.710093  
58569, 27430, 284.0848, 0.709939  
58570, 26788, 284.0228, 0.709784  
58571, 26452, 283.9609, 0.709629  
58572, 26302, 283.8990, 0.709474  
58573, 26218, 283.8370, 0.709320  
58574, 26206, 283.7751, 0.709165  
58575, 26282, 283.7132, 0.709010  
58576, 26386, 283.6513, 0.708855  
58577, 26376, 283.5893, 0.708700  
58578, 26228, 283.5274, 0.708546  
58579, 26152, 283.4655, 0.708391  
58580, 26394, 283.4036, 0.708236  
58581, 26948, 283.3416, 0.708081  
58582, 27472, 283.2797, 0.707927  
58583, 27584, 283.2178, 0.707772  
58584, 27258, 283.1558, 0.707617  
58585, 26886, 283.0939, 0.707462  
58586, 26880, 283.0320, 0.707308  
58587, 27226, 282.9701, 0.707153  
58588, 27482, 282.9081, 0.706998  
58589, 27212, 282.8462, 0.706843  
58590, 26496, 282.7843, 0.706689  
58591, 25878, 282.7224, 0.706534  
58592, 25842, 282.6604, 0.706379  
58593, 26378, 282.5985, 0.706224  
58594, 27004, 282.5366, 0.706070  
58595, 27304, 282.4747, 0.705915  
58596, 27294, 282.4127, 0.705760  
58597, 27320, 282.3508, 0.705605  
58598, 27588, 282.2889, 0.705451  
58599, 27890, 282.2269, 0.705296  
58600, 27838, 282.1650, 0.705141  
58601, 27332, 282.1031, 0.704986  
58602, 26716, 282.0412, 0.704832  
58603, 26476, 281.9792, 0.704677  
58604, 26756, 281.9173, 0.704522  
58605, 27240, 281.8554, 0.704367  
58606, 27426, 281.7935, 0.704213  
58607, 27082, 281.7315, 0.704058  
58608, 26358, 281.6696, 0.703903  
58609, 25570, 281.6077, 0.703748  
58610, 24942, 281.5457, 0.703593  
58611, 24510, 281.4838, 0.703439  
58612, 24250, 281.4219, 0.703284  
58613, 24174, 281.3600, 0.703129  
58614, 24292, 281.2980, 0.702974  
58615, 24572, 281.2361, 0.702820  
58616, 24950, 281.1742, 0.702665  
58617, 25452, 281.1123, 0.702510  
58618, 26162, 281.0503, 0.702355  
58619, 27064, 280.9884, 0.702201  
58620, 27928, 280.9265, 0.702046  
58621, 28366, 280.8646, 0.701891  
58622, 28146, 280.8026, 0.701736  
58623, 27420, 280.7407, 0.701582  
58624, 26626, 280.6788, 0.701427  
58625, 26180, 280.6168, 0.701272  
58626, 26200, 280.5549, 0.701117  
58627, 26490, 280.4930, 0.700963  
58628, 26836, 280.4311, 0.700808  
58629, 27184, 280.3691, 0.700653  
58630, 27614, 280.3072, 0.700498

58631, 28162, 280.2453, 0.700344  
58632, 28718, 280.1834, 0.700189  
58633, 29114, 280.1214, 0.700034  
58634, 29264, 280.0595, 0.699879  
58635, 29196, 279.9976, 0.699725  
58636, 29004, 279.9357, 0.699570  
58637, 28722, 279.8737, 0.699415  
58638, 28366, 279.8118, 0.699260  
58639, 28022, 279.7499, 0.699106  
58640, 27840, 279.6879, 0.698951  
58641, 27956, 279.6260, 0.698796  
58642, 28370, 279.5641, 0.698641  
58643, 28926, 279.5022, 0.698486  
58644, 29390, 279.4402, 0.698332  
58645, 29596, 279.3783, 0.698177  
58646, 29516, 279.3164, 0.698022  
58647, 29256, 279.2545, 0.697867  
58648, 28974, 279.1925, 0.697713  
58649, 28826, 279.1306, 0.697558  
58650, 28864, 279.0687, 0.697403  
58651, 29008, 279.0067, 0.697248  
58652, 29126, 278.9448, 0.697094  
58653, 29140, 278.8829, 0.696939  
58654, 29122, 278.8210, 0.696784  
58655, 29226, 278.7590, 0.696629  
58656, 29476, 278.6971, 0.696475  
58657, 29696, 278.6352, 0.696320  
58658, 29624, 278.5733, 0.696165  
58659, 29188, 278.5113, 0.696010  
58660, 28618, 278.4494, 0.695856  
58661, 28268, 278.3875, 0.695701  
58662, 28272, 278.3256, 0.695546  
58663, 28400, 278.2636, 0.695391  
58664, 28264, 278.2017, 0.695237  
58665, 27698, 278.1398, 0.695082  
58666, 26912, 278.0778, 0.694927  
58667, 26286, 278.0159, 0.694772  
58668, 26022, 277.9540, 0.694618  
58669, 26022, 277.8921, 0.694463  
58670, 26074, 277.8301, 0.694308  
58671, 26126, 277.7682, 0.694153  
58672, 26330, 277.7063, 0.693999  
58673, 26808, 277.6444, 0.693844  
58674, 27444, 277.5824, 0.693689  
58675, 27952, 277.5205, 0.693534  
58676, 28122, 277.4586, 0.693379  
58677, 28006, 277.3966, 0.693225  
58678, 27844, 277.3347, 0.693070  
58679, 27804, 277.2728, 0.692915  
58680, 27860, 277.2109, 0.692760  
58681, 27886, 277.1489, 0.692606  
58682, 27818, 277.0870, 0.692451  
58683, 27672, 277.0251, 0.692296  
58684, 27462, 276.9632, 0.692141  
58685, 27160, 276.9012, 0.691987  
58686, 26762, 276.8393, 0.691832  
58687, 26384, 276.7774, 0.691677  
58688, 26160, 276.7155, 0.691522  
58689, 26096, 276.6535, 0.691368  
58690, 25978, 276.5916, 0.691213  
58691, 25608, 276.5297, 0.691058  
58692, 25072, 276.4677, 0.690903  
58693, 24776, 276.4058, 0.690749  
58694, 25104, 276.3439, 0.690594  
58695, 26012, 276.2820, 0.690439  
58696, 26978, 276.2200, 0.690284  
58697, 27436, 276.1581, 0.690130  
58698, 27242, 276.0962, 0.689975  
58699, 26780, 276.0343, 0.689820  
58700, 26552, 275.9723, 0.689665  
58701, 26760, 275.9104, 0.689511  
58702, 27194, 275.8485, 0.689356  
58703, 27546, 275.7865, 0.689201  
58704, 27720, 275.7246, 0.689046  
58705, 27830, 275.6627, 0.688892  
58706, 27968, 275.6008, 0.688737

58707, 28036, 275.5388, 0.688582  
58708, 27866, 275.4769, 0.688427  
58709, 27482, 275.4150, 0.688272  
58710, 27094, 275.3531, 0.688118  
58711, 26930, 275.2911, 0.687963  
58712, 26978, 275.2292, 0.687808  
58713, 26996, 275.1673, 0.687653  
58714, 26782, 275.1054, 0.687499  
58715, 26354, 275.0434, 0.687344  
58716, 25936, 274.9815, 0.687189  
58717, 25774, 274.9196, 0.687034  
58718, 25962, 274.8576, 0.686880  
58719, 26478, 274.7957, 0.686725  
58720, 27214, 274.7338, 0.686570  
58721, 27988, 274.6719, 0.686415  
58722, 28518, 274.6099, 0.686261  
58723, 28582, 274.5480, 0.686106  
58724, 28182, 274.4861, 0.685951  
58725, 27668, 274.4242, 0.685796  
58726, 27452, 274.3622, 0.685642  
58727, 27660, 274.3003, 0.685487  
58728, 27950, 274.2384, 0.685332  
58729, 27822, 274.1764, 0.685177  
58730, 27106, 274.1145, 0.685023  
58731, 26142, 274.0526, 0.684868  
58732, 25492, 273.9907, 0.684713  
58733, 25390, 273.9287, 0.684558  
58734, 25606, 273.8668, 0.684404  
58735, 25746, 273.8049, 0.684249  
58736, 25704, 273.7430, 0.684094  
58737, 25730, 273.6810, 0.683939  
58738, 26106, 273.6191, 0.683785  
58739, 26750, 273.5572, 0.683630  
58740, 27286, 273.4953, 0.683475  
58741, 27430, 273.4333, 0.683320  
58742, 27272, 273.3714, 0.683165  
58743, 27184, 273.3095, 0.683011  
58744, 27408, 273.2475, 0.682856  
58745, 27864, 273.1856, 0.682701  
58746, 28316, 273.1237, 0.682546  
58747, 28684, 273.0618, 0.682392  
58748, 29120, 272.9998, 0.682237  
58749, 29730, 272.9379, 0.682082  
58750, 30322, 272.8760, 0.681927  
58751, 30480, 272.8141, 0.681773  
58752, 29952, 272.7521, 0.681618  
58753, 28890, 272.6902, 0.681463  
58754, 27736, 272.6283, 0.681308  
58755, 26848, 272.5663, 0.681154  
58756, 26276, 272.5044, 0.680999  
58757, 25854, 272.4425, 0.680844  
58758, 25472, 272.3806, 0.680689  
58759, 25204, 272.3186, 0.680535  
58760, 25154, 272.2567, 0.680380  
58761, 25296, 272.1948, 0.680225  
58762, 25478, 272.1329, 0.680070  
58763, 25596, 272.0709, 0.679916  
58764, 25672, 272.0090, 0.679761  
58765, 25776, 271.9471, 0.679606  
58766, 25914, 271.8852, 0.679451  
58767, 26026, 271.8232, 0.679297  
58768, 26146, 271.7613, 0.679142  
58769, 26422, 271.6994, 0.678987  
58770, 26992, 271.6374, 0.678832  
58771, 27754, 271.5755, 0.678678  
58772, 28418, 271.5136, 0.678523  
58773, 28366, 271.4517, 0.678368  
58774, 28792, 271.3897, 0.678213  
58775, 28832, 271.3278, 0.678058  
58776, 29034, 271.2659, 0.677904  
58777, 29234, 271.2040, 0.677749  
58778, 29092, 271.1420, 0.677594  
58779, 28492, 271.0801, 0.677439  
58780, 27710, 271.0182, 0.677285  
58781, 27218, 270.9562, 0.677130  
58782, 27218, 270.8943, 0.676975

58783, 27500, 270.8324, 0.676820  
58784, 27644, 270.7705, 0.676666  
58785, 27450, 270.7085, 0.676511  
58786, 27042, 270.6466, 0.676356  
58787, 26672, 270.5847, 0.676201  
58788, 26398, 270.5228, 0.676047  
58789, 26104, 270.4608, 0.675892  
58790, 25726, 270.3989, 0.675737  
58791, 25434, 270.3370, 0.675582  
58792, 25498, 270.2751, 0.675428  
58793, 26012, 270.2131, 0.675273  
58794, 26730, 270.1512, 0.675118  
58795, 27266, 270.0893, 0.674963  
58796, 27418, 270.0273, 0.674809  
58797, 27288, 269.9654, 0.674654  
58798, 27150, 269.9035, 0.674499  
58799, 27156, 269.8416, 0.674344  
58800, 27280, 269.7796, 0.674190  
58801, 27390, 269.7177, 0.674035  
58802, 27426, 269.6558, 0.673880  
58803, 27420, 269.5939, 0.673725  
58804, 27404, 269.5319, 0.673571  
58805, 27376, 269.4700, 0.673416  
58806, 27308, 269.4081, 0.673261  
58807, 27210, 269.3461, 0.673106  
58808, 27124, 269.2842, 0.672951  
58809, 27046, 269.2223, 0.672797  
58810, 26930, 269.1604, 0.672642  
58811, 26754, 269.0984, 0.672487  
58812, 26576, 269.0365, 0.672332  
58813, 26488, 268.9746, 0.672178  
58814, 26532, 268.9127, 0.672023  
58815, 26648, 268.8507, 0.671868  
58816, 26722, 268.7888, 0.671713  
58817, 26648, 268.7269, 0.671559  
58818, 26328, 268.6650, 0.671404  
58819, 25686, 268.6030, 0.671249  
58820, 24722, 268.5411, 0.671094  
58821, 23638, 268.4792, 0.670940  
58822, 22880, 268.4172, 0.670785  
58823, 22878, 268.3553, 0.670630  
58824, 23702, 268.2934, 0.670475  
58825, 24908, 268.2315, 0.670321  
58826, 25812, 268.1695, 0.670166  
58827, 26042, 268.1076, 0.670011  
58828, 25788, 268.0457, 0.669856  
58829, 25610, 267.9838, 0.669702  
58830, 25872, 267.9218, 0.669547  
58831, 26424, 267.8599, 0.669392  
58832, 26774, 267.7980, 0.669237  
58833, 26552, 267.7360, 0.669083  
58834, 25808, 267.6741, 0.668928  
58835, 24856, 267.6122, 0.668773  
58836, 23954, 267.5503, 0.668618  
58837, 23172, 267.4883, 0.668463  
58838, 22566, 267.4264, 0.668309  
58839, 22350, 267.3645, 0.668154  
58840, 22800, 267.3026, 0.667999  
58841, 23934, 267.2406, 0.667844  
58842, 25380, 267.1787, 0.667690  
58843, 26582, 267.1168, 0.667535  
58844, 27210, 267.0549, 0.667380  
58845, 27358, 266.9929, 0.667225  
58846, 27352, 266.9310, 0.667071  
58847, 27426, 266.8691, 0.666916  
58848, 27578, 266.8071, 0.666761  
58849, 27744, 266.7452, 0.666606  
58850, 27968, 266.6833, 0.666452  
58851, 28348, 266.6214, 0.666297  
58852, 28856, 266.5594, 0.666142  
58853, 29262, 266.4975, 0.665987  
58854, 29342, 266.4356, 0.665833  
58855, 29108, 266.3737, 0.665678  
58856, 28796, 266.3117, 0.665523  
58857, 28618, 266.2498, 0.665368  
58858, 28540, 266.1879, 0.665214

58859, 28356, 266.1260, 0.665059  
58860, 28018, 266.0640, 0.664904  
58861, 27740, 266.0021, 0.664749  
58862, 27828, 265.9402, 0.664595  
58863, 28302, 265.8782, 0.664440  
58864, 28838, 265.8163, 0.664285  
58865, 29034, 265.7544, 0.664130  
58866, 28748, 265.6925, 0.663976  
58867, 28188, 265.6305, 0.663821  
58868, 27628, 265.5686, 0.663666  
58869, 27158, 265.5067, 0.663511  
58870, 26706, 265.4448, 0.663356  
58871, 26232, 265.3828, 0.663202  
58872, 25886, 265.3209, 0.663047  
58873, 25816, 265.2590, 0.662892  
58874, 25994, 265.1970, 0.662737  
58875, 26186, 265.1351, 0.662583  
58876, 26232, 265.0732, 0.662428  
58877, 26218, 265.0113, 0.662273  
58878, 26390, 264.9493, 0.662118  
58879, 26842, 264.8874, 0.661964  
58880, 27386, 264.8255, 0.661809  
58881, 27748, 264.7636, 0.661654  
58882, 27836, 264.7016, 0.661499  
58883, 27846, 264.6397, 0.661345  
58884, 28018, 264.5778, 0.661190  
58885, 28320, 264.5159, 0.661035  
58886, 28506, 264.4539, 0.660880  
58887, 28402, 264.3920, 0.660726  
58888, 28130, 264.3301, 0.660571  
58889, 27998, 264.2681, 0.660416  
58890, 28150, 264.2062, 0.660261  
58891, 28390, 264.1443, 0.660107  
58892, 28348, 264.0824, 0.659952  
58893, 27842, 264.0204, 0.659797  
58894, 27012, 263.9585, 0.659642  
58895, 26180, 263.8966, 0.659488  
58896, 25584, 263.8347, 0.659333  
58897, 25312, 263.7727, 0.659178  
58898, 25386, 263.7108, 0.659023  
58899, 25808, 263.6489, 0.658869  
58900, 26458, 263.5869, 0.658714  
58901, 27062, 263.5250, 0.658559  
58902, 27318, 263.4631, 0.658404  
58903, 27176, 263.4012, 0.658249  
58904, 26940, 263.3392, 0.658095  
58905, 27040, 263.2773, 0.657940  
58906, 27602, 263.2154, 0.657785  
58907, 28338, 263.1535, 0.657630  
58908, 28794, 263.0915, 0.657476  
58909, 28796, 263.0296, 0.657321  
58910, 28562, 262.9677, 0.657166  
58911, 28456, 262.9058, 0.657011  
58912, 28628, 262.8438, 0.656857  
58913, 28950, 262.7819, 0.656702  
58914, 29244, 262.7200, 0.656547  
58915, 29486, 262.6580, 0.656392  
58916, 29722, 262.5961, 0.656238  
58917, 29886, 262.5342, 0.656083  
58918, 29776, 262.4723, 0.655928  
58919, 29300, 262.4103, 0.655773  
58920, 28670, 262.3484, 0.655619  
58921, 28296, 262.2865, 0.655464  
58922, 28354, 262.2246, 0.655309  
58923, 28560, 262.1626, 0.655154  
58924, 28452, 262.1007, 0.655000  
58925, 27872, 262.0388, 0.654845  
58926, 27182, 261.9768, 0.654690  
58927, 26930, 261.9149, 0.654535  
58928, 27304, 261.8530, 0.654381  
58929, 27952, 261.7911, 0.654226  
58930, 28354, 261.7291, 0.654071  
58931, 28322, 261.6672, 0.653916  
58932, 28134, 261.6053, 0.653762  
58933, 28166, 261.5434, 0.653607  
58934, 28474, 261.4814, 0.653452

58935, 28802, 261.4195, 0.653297  
58936, 28902, 261.3576, 0.653142  
58937, 28820, 261.2957, 0.652988  
58938, 28766, 261.2337, 0.652833  
58939, 28804, 261.1718, 0.652678  
58940, 28718, 261.1099, 0.652523  
58941, 28248, 261.0479, 0.652369  
58942, 27432, 260.9860, 0.652214  
58943, 26640, 260.9241, 0.652059  
58944, 26314, 260.8622, 0.651904  
58945, 26632, 260.8002, 0.651750  
58946, 27472, 260.7383, 0.651595  
58947, 28574, 260.6764, 0.651440  
58948, 29694, 260.6145, 0.651285  
58949, 30616, 260.5525, 0.651131  
58950, 31094, 260.4906, 0.650976  
58951, 30992, 260.4287, 0.650821  
58952, 30462, 260.3667, 0.650666  
58953, 29918, 260.3048, 0.650512  
58954, 29750, 260.2429, 0.650357  
58955, 29964, 260.1810, 0.650202  
58956, 30208, 260.1190, 0.650047  
58957, 30136, 260.0571, 0.649893  
58958, 29756, 259.9952, 0.649738  
58959, 29392, 259.9333, 0.649583  
58960, 29290, 259.8713, 0.649428  
58961, 29318, 259.8094, 0.649274  
58962, 29164, 259.7475, 0.649119  
58963, 28708, 259.6856, 0.648964  
58964, 28292, 259.6236, 0.648809  
58965, 28396, 259.5617, 0.648655  
58966, 29144, 259.4998, 0.648500  
58967, 30124, 259.4378, 0.648345  
58968, 30702, 259.3759, 0.648190  
58969, 30548, 259.3140, 0.648035  
58970, 29838, 259.2521, 0.647881  
58971, 29020, 259.1901, 0.647726  
58972, 28474, 259.1282, 0.647571  
58973, 28304, 259.0663, 0.647416  
58974, 28434, 259.0044, 0.647262  
58975, 28712, 258.9424, 0.647107  
58976, 28918, 258.8805, 0.646952  
58977, 28822, 258.8186, 0.646797  
58978, 28328, 258.7566, 0.646643  
58979, 27666, 258.6947, 0.646488  
58980, 27310, 258.6328, 0.646333  
58981, 27592, 258.5709, 0.646178  
58982, 28354, 258.5089, 0.646024  
58983, 29038, 258.4470, 0.645869  
58984, 29174, 258.3851, 0.645714  
58985, 28790, 258.3232, 0.645559  
58986, 28344, 258.2612, 0.645405  
58987, 28206, 258.1993, 0.645250  
58988, 28292, 258.1374, 0.645095  
58989, 28268, 258.0755, 0.644940  
58990, 28016, 258.0135, 0.644786  
58991, 27832, 257.9516, 0.644631  
58992, 28090, 257.8897, 0.644476  
58993, 28700, 257.8277, 0.644321  
58994, 29082, 257.7658, 0.644167  
58995, 28666, 257.7039, 0.644012  
58996, 27508, 257.6420, 0.643857  
58997, 26290, 257.5800, 0.643702  
58998, 25738, 257.5181, 0.643548  
58999, 26014, 257.4562, 0.643393  
59000, 26704, 257.3943, 0.643238  
59001, 27310, 257.3323, 0.643083  
59002, 27684, 257.2704, 0.642928  
59003, 27960, 257.2085, 0.642774  
59004, 28218, 257.1465, 0.642619  
59005, 28320, 257.0846, 0.642464  
59006, 28150, 257.0227, 0.642309  
59007, 27904, 256.9608, 0.642155  
59008, 27952, 256.8988, 0.642000  
59009, 28438, 256.8369, 0.641845  
59010, 29004, 256.7750, 0.641690



59011, 29092, 256.7131, 0.641536  
59012, 28514, 256.6511, 0.641381  
59013, 27662, 256.5892, 0.641226  
59014, 27122, 256.5273, 0.641071  
59015, 27102, 256.4654, 0.640917  
59016, 27258, 256.4034, 0.640762  
59017, 27184, 256.3415, 0.640607  
59018, 26910, 256.2796, 0.640452  
59019, 26948, 256.2176, 0.640298  
59020, 27708, 256.1557, 0.640143  
59021, 28988, 256.0938, 0.639988  
59022, 30060, 255.0319, 0.639833  
59023, 30278, 255.9699, 0.639679  
59024, 29610, 255.9080, 0.639524  
59025, 28570, 255.8461, 0.639369  
59026, 27722, 255.7842, 0.639214  
59027, 27282, 255.7222, 0.639060  
59028, 27118, 255.6603, 0.638905  
59029, 27084, 255.5984, 0.638750  
59030, 27190, 255.5364, 0.638595  
59031, 27534, 255.4745, 0.638441  
59032, 28080, 255.4126, 0.638286  
59033, 28652, 255.3507, 0.638131  
59034, 29074, 255.2887, 0.637976  
59035, 29274, 255.2268, 0.637821  
59036, 29274, 255.1649, 0.637667  
59037, 29070, 255.1030, 0.637512  
59038, 28686, 255.0410, 0.637357  
59039, 28236, 254.9791, 0.637202  
59040, 27942, 254.9172, 0.637048  
59041, 27938, 254.8553, 0.636893  
59042, 28112, 254.7933, 0.636738  
59043, 28162, 254.7314, 0.636583  
59044, 27930, 254.6695, 0.636429  
59045, 27590, 254.6075, 0.636274  
59046, 27534, 254.5456, 0.636119  
59047, 28020, 254.4837, 0.635964  
59048, 28914, 254.4218, 0.635810  
59049, 29824, 254.3598, 0.635655  
59050, 30434, 254.2979, 0.635500  
59051, 30704, 254.2360, 0.635345  
59052, 30776, 254.1741, 0.635191  
59053, 30740, 254.1121, 0.635036  
59054, 30570, 254.0502, 0.634881  
59055, 30260, 253.9883, 0.634726  
59056, 29936, 253.9263, 0.634572  
59057, 29742, 253.8644, 0.634417  
59058, 29662, 253.8025, 0.634262  
59059, 29498, 253.7406, 0.634107  
59060, 29102, 253.6786, 0.633953  
59061, 28586, 253.6167, 0.633798  
59062, 28296, 253.5548, 0.633643  
59063, 28450, 253.4929, 0.633488  
59064, 28934, 253.4309, 0.633334  
59065, 29410, 253.3690, 0.633179  
59066, 29628, 253.3071, 0.633024  
59067, 29634, 253.2452, 0.632869  
59068, 29644, 253.1832, 0.632714  
59069, 29750, 253.1213, 0.632560  
59070, 29856, 253.0594, 0.632405  
59071, 29818, 252.9974, 0.632250  
59072, 29670, 252.9355, 0.632095  
59073, 29538, 252.8736, 0.631941  
59074, 29446, 252.8117, 0.631786  
59075, 29256, 252.7497, 0.631631  
59076, 28846, 252.6878, 0.631476  
59077, 28376, 252.6259, 0.631322  
59078, 28220, 252.5640, 0.631167  
59079, 28608, 252.5020, 0.631012  
59080, 29336, 252.4401, 0.630857  
59081, 29910, 252.3782, 0.630703  
59082, 29974, 252.3163, 0.630548  
59083, 29626, 252.2543, 0.630393  
59084, 29288, 252.1924, 0.630238  
59085, 29266, 252.1305, 0.630084  
59086, 29510, 252.0685, 0.629929

59087, 29798, 252.0066, 0.629774  
59088, 30008, 251.9447, 0.629619  
59089, 30228, 251.8828, 0.629465  
59090, 30526, 251.8208, 0.629310  
59091, 30790, 251.7589, 0.629155  
59092, 30816, 251.6970, 0.629000  
59093, 30618, 251.6351, 0.628846  
59094, 30498, 251.5731, 0.628691  
59095, 30734, 251.5112, 0.628536  
59096, 31226, 251.4493, 0.628381  
59097, 31522, 251.3873, 0.628226  
59098, 31240, 251.3254, 0.628072  
59099, 30512, 251.2635, 0.627917  
59100, 29874, 251.2016, 0.627762  
59101, 29720, 251.1396, 0.627607  
59102, 29886, 251.0777, 0.627453  
59103, 29816, 251.0158, 0.627298  
59104, 29118, 250.9539, 0.627143  
59105, 27994, 250.8919, 0.626988  
59106, 27030, 250.8300, 0.626834  
59107, 26676, 250.7681, 0.626679  
59108, 26882, 250.7062, 0.626524  
59109, 27272, 250.6442, 0.626369  
59110, 27532, 250.5823, 0.626215  
59111, 27620, 250.5204, 0.626060  
59112, 27620, 250.4584, 0.625905  
59113, 27544, 250.3965, 0.625750  
59114, 27304, 250.3346, 0.625596  
59115, 26884, 250.2727, 0.625441  
59116, 26434, 250.2107, 0.625286  
59117, 26150, 250.1488, 0.625131  
59118, 26054, 250.0869, 0.624977  
59119, 26032, 250.0250, 0.624822  
59120, 26026, 249.9630, 0.624667  
59121, 26120, 249.9011, 0.624512  
59122, 26462, 249.8392, 0.624358  
59123, 27010, 249.7772, 0.624203  
59124, 27512, 249.7153, 0.624048  
59125, 27768, 249.6534, 0.623893  
59126, 27854, 249.5915, 0.623739  
59127, 28084, 249.5295, 0.623584  
59128, 28678, 249.4676, 0.623429  
59129, 29532, 249.4057, 0.623274  
59130, 30324, 249.3438, 0.623119  
59131, 30848, 249.2818, 0.622965  
59132, 31120, 249.2199, 0.622810  
59133, 31226, 249.1580, 0.622655  
59134, 31084, 249.0961, 0.622500  
59135, 30536, 249.0341, 0.622346  
59136, 29656, 248.9722, 0.622191  
59137, 28896, 248.9103, 0.622036  
59138, 28786, 248.8483, 0.621881  
59139, 29426, 248.7864, 0.621727  
59140, 30332, 248.7245, 0.621572  
59141, 30818, 248.6626, 0.621417  
59142, 30640, 248.6006, 0.621262  
59143, 30128, 248.5387, 0.621108  
59144, 29766, 248.4768, 0.620953  
59145, 29642, 248.4149, 0.620798  
59146, 29398, 248.3529, 0.620643  
59147, 28718, 248.2910, 0.620489  
59148, 27804, 248.2291, 0.620334  
59149, 27270, 248.1671, 0.620179  
59150, 27556, 248.1052, 0.620024  
59151, 28484, 248.0433, 0.619870  
59152, 29424, 247.9814, 0.619715  
59153, 29860, 247.9194, 0.619560  
59154, 29798, 247.8575, 0.619405  
59155, 29598, 247.7956, 0.619251  
59156, 29538, 247.7337, 0.619096  
59157, 29596, 247.6717, 0.618941  
59158, 29620, 247.6098, 0.618786  
59159, 29618, 247.5479, 0.618632  
59160, 29736, 247.4860, 0.618477  
59161, 29990, 247.4240, 0.618322  
59162, 30144, 247.3621, 0.618167

59163, 29906, 247.3002, 0.618012  
59164, 29292, 247.2382, 0.617858  
59165, 28658, 247.1763, 0.617703  
59166, 28382, 247.1144, 0.617548  
59167, 28464, 247.0525, 0.617393  
59168, 28578, 246.9905, 0.617239  
59169, 28482, 246.9286, 0.617084  
59170, 28320, 246.8667, 0.616929  
59171, 28516, 246.8048, 0.616774  
59172, 29312, 246.7428, 0.616620  
59173, 30462, 246.6809, 0.616465  
59174, 31392, 246.6190, 0.616310  
59175, 31682, 246.5570, 0.616155  
59176, 31310, 246.4951, 0.616001  
59177, 30540, 246.4332, 0.615846  
59178, 29626, 246.3713, 0.615691  
59179, 28672, 246.3093, 0.615536  
59180, 27764, 246.2474, 0.615382  
59181, 27104, 246.1855, 0.615227  
59182, 26910, 246.1236, 0.615072  
59183, 27218, 246.0616, 0.614917  
59184, 27774, 245.9997, 0.614763  
59185, 28224, 245.9378, 0.614608  
59186, 28340, 245.8759, 0.614453  
59187, 28160, 245.8139, 0.614298  
59188, 27832, 245.7520, 0.614144  
59189, 27480, 245.6901, 0.613989  
59190, 27174, 245.6281, 0.613834  
59191, 27020, 245.5662, 0.613679  
59192, 27168, 245.5043, 0.613525  
59193, 27670, 245.4424, 0.613370  
59194, 28406, 245.3804, 0.613215  
59195, 29102, 245.3185, 0.613060  
59196, 29542, 245.2566, 0.612905  
59197, 29662, 245.1947, 0.612751  
59198, 29508, 245.1327, 0.612596  
59199, 29118, 245.0708, 0.612441  
59200, 28536, 245.0089, 0.612286  
59201, 27936, 244.9469, 0.612132  
59202, 27612, 244.8850, 0.611977  
59203, 27810, 244.8231, 0.611822  
59204, 28490, 244.7612, 0.611667  
59205, 29324, 244.6992, 0.611513  
59206, 29970, 244.6373, 0.611358  
59207, 30336, 244.5754, 0.611203  
59208, 30574, 244.5135, 0.611048  
59209, 30774, 244.4515, 0.610894  
59210, 30764, 244.3896, 0.610739  
59211, 30292, 244.3277, 0.610584  
59212, 29382, 244.2658, 0.610429  
59213, 28456, 244.2038, 0.610275  
59214, 27968, 244.1419, 0.610120  
59215, 27974, 244.0800, 0.609965  
59216, 28052, 244.0180, 0.609810  
59217, 27764, 243.9561, 0.609656  
59218, 27154, 243.8942, 0.609501  
59219, 26732, 243.8323, 0.609346  
59220, 26956, 243.7703, 0.609191  
59221, 27708, 243.7084, 0.609037  
59222, 28384, 243.6465, 0.608882  
59223, 28432, 243.5846, 0.608727  
59224, 27868, 243.5226, 0.608572  
59225, 27184, 243.4607, 0.608418  
59226, 26814, 243.3988, 0.608263  
59227, 26772, 243.3368, 0.608108  
59228, 26768, 243.2749, 0.607953  
59229, 26634, 243.2130, 0.607798  
59230, 26522, 243.1511, 0.607644  
59231, 26668, 243.0891, 0.607489  
59232, 27078, 243.0272, 0.607334  
59233, 27492, 242.9653, 0.607179  
59234, 27708, 242.9034, 0.607025  
59235, 27838, 242.8414, 0.606870  
59236, 28202, 242.7795, 0.606715  
59237, 28944, 242.7176, 0.606560  
59238, 29840, 242.6557, 0.606406

59239, 30496, 242.5937, 0.606251  
59240, 30720, 242.5318, 0.606096  
59241, 30690, 242.4699, 0.605941  
59242, 30712, 242.4079, 0.605787  
59243, 30912, 242.3460, 0.605632  
59244, 31150, 242.2841, 0.605477  
59245, 31258, 242.2222, 0.605322  
59246, 31212, 242.1602, 0.605168  
59247, 31124, 242.0983, 0.605013  
59248, 31022, 242.0364, 0.604858  
59249, 30774, 241.9745, 0.604703  
59250, 30224, 241.9125, 0.604549  
59251, 29392, 241.8506, 0.604394  
59252, 28506, 241.7887, 0.604239  
59253, 27802, 241.7267, 0.604084  
59254, 27354, 241.6648, 0.603930  
59255, 27096, 241.6029, 0.603775  
59256, 26996, 241.5410, 0.603620  
59257, 27092, 241.4790, 0.603465  
59258, 27412, 241.4171, 0.603311  
59259, 27838, 241.3552, 0.603156  
59260, 28160, 241.2933, 0.603001  
59261, 28282, 241.2313, 0.602846  
59262, 28286, 241.1694, 0.602691  
59263, 28350, 241.1075, 0.602537  
59264, 28524, 241.0456, 0.602382  
59265, 28696, 240.9836, 0.602227  
59266, 28716, 240.9217, 0.602072  
59267, 28546, 240.8598, 0.601918  
59268, 28256, 240.7978, 0.601763  
59269, 27906, 240.7359, 0.601608  
59270, 27498, 240.6740, 0.601453  
59271, 27076, 240.6121, 0.601299  
59272, 26822, 240.5501, 0.601144  
59273, 26934, 240.4882, 0.600989  
59274, 27394, 240.4263, 0.600834  
59275, 27862, 240.3644, 0.600680  
59276, 27936, 240.3024, 0.600525  
59277, 27538, 240.2405, 0.600370  
59278, 27022, 240.1786, 0.600215  
59279, 26854, 240.1167, 0.600061  
59280, 27180, 240.0547, 0.599906  
59281, 27730, 239.9928, 0.599751  
59282, 28176, 239.9309, 0.599596  
59283, 28512, 239.8689, 0.599442  
59284, 29030, 239.8070, 0.599287  
59285, 29898, 239.7451, 0.599132  
59286, 30812, 239.6832, 0.598977  
59287, 31194, 239.6212, 0.598823  
59288, 30708, 239.5593, 0.598668  
59289, 29628, 239.4974, 0.598513  
59290, 28600, 239.4355, 0.598358  
59291, 28084, 239.3735, 0.598204  
59292, 28004, 239.3116, 0.598049  
59293, 27984, 239.2497, 0.597894  
59294, 27792, 239.1877, 0.597739  
59295, 27562, 239.1258, 0.597584  
59296, 27580, 239.0639, 0.597430  
59297, 27904, 239.0020, 0.597275  
59298, 28328, 238.9400, 0.597120  
59299, 28598, 238.8781, 0.596965  
59300, 28674, 238.8162, 0.596811  
59301, 28672, 238.7543, 0.596656  
59302, 28658, 238.6923, 0.596501  
59303, 28566, 238.6304, 0.596346  
59304, 28352, 238.5685, 0.596192  
59305, 28204, 238.5066, 0.596037  
59306, 28374, 238.4446, 0.595882  
59307, 28886, 238.3827, 0.595727  
59308, 29356, 238.3208, 0.595573  
59309, 29272, 238.2588, 0.595418  
59310, 28470, 238.1969, 0.595263  
59311, 27336, 238.1350, 0.595108  
59312, 26508, 238.0731, 0.594954  
59313, 26374, 238.0111, 0.594799  
59314, 26822, 237.9492, 0.594644  
59315, 27436, 237.8873, 0.594489  
59316, 27894, 237.8254, 0.594335  
59317, 28140, 237.7634, 0.594180  
59318, 28218, 237.7015, 0.594025  
59319, 28102, 237.6396, 0.593870  
59320, 27742, 237.5776, 0.593716  
59321, 27232, 237.5157, 0.593561  
59322, 26858, 237.4538, 0.593406  
59323, 26890, 237.3919, 0.593251  
59324, 27328, 237.3299, 0.593097  
59325, 27920, 237.2680, 0.592942  
59326, 28410, 237.2061, 0.592787  
59327, 28768, 237.1442, 0.592632  
59328, 29140, 237.0822, 0.592477  
59329, 29588, 237.0203, 0.592323  
59330, 29952, 236.9584, 0.592168  
59331, 30038, 236.8965, 0.592013  
59332, 29848, 236.8345, 0.591858  
59333, 29640, 236.7726, 0.591704  
59334, 29662, 236.7107, 0.591549  
59335, 29860, 236.6487, 0.591394  
59336, 29920, 236.5868, 0.591239  
59337, 29558, 236.5249, 0.591085  
59338, 28848, 236.4630, 0.590930  
59339, 28162, 236.4010, 0.590775  
59340, 27886, 236.3391, 0.590620  
59341, 28104, 236.2772, 0.590466  
59342, 28610, 236.2153, 0.590311  
59343, 29124, 236.1533, 0.590156  
59344, 29492, 236.0914, 0.590001  
59345, 29720, 236.0295, 0.589847  
59346, 29882, 235.9675, 0.589692  
59347, 30002, 235.9056, 0.589537  
59348, 30066, 235.8437, 0.589382  
59349, 30032, 235.7818, 0.589228  
59350, 29860, 235.7198, 0.589073  
59351, 29562, 235.6579, 0.588918  
59352, 29266, 235.5960, 0.588763  
59353, 29188, 235.5341, 0.588609  
59354, 29512, 235.4721, 0.588454  
59355, 30178, 235.4102, 0.588299  
59356, 30870, 235.3483, 0.588144  
59357, 31222, 235.2864, 0.587990  
59358, 31096, 235.2244, 0.587835  
59359, 30676, 235.1625, 0.587680  
59360, 30244, 235.1006, 0.587525  
59361, 29898, 235.0386, 0.587370  
59362, 29504, 234.9767, 0.587216  
59363, 28956, 234.9148, 0.587061  
59364, 28414, 234.8529, 0.586906  
59365, 28196, 234.7909, 0.586751  
59366, 28446, 234.7290, 0.586597  
59367, 28908, 234.6671, 0.586442  
59368, 29138, 234.6052, 0.586287  
59369, 28972, 234.5432, 0.586132  
59370, 28684, 234.4813, 0.585978  
59371, 28698, 234.4194, 0.585823  
59372, 29102, 234.3574, 0.585668  
59373, 29516, 234.2955, 0.585513  
59374, 29480, 234.2336, 0.585359  
59375, 28942, 234.1717, 0.585204  
59376, 28334, 234.1097, 0.585049  
59377, 28126, 234.0478, 0.584894  
59378, 28388, 233.9859, 0.584740  
59379, 28766, 233.9240, 0.584585  
59380, 28912, 233.8620, 0.584430  
59381, 28874, 233.8001, 0.584275  
59382, 28968, 233.7382, 0.584121  
59383, 29360, 233.6763, 0.583966  
59384, 29878, 233.6143, 0.583811  
59385, 30174, 233.5524, 0.583656  
59386, 30146, 233.4905, 0.583502  
59387, 30008, 233.4285, 0.583347  
59388, 29988, 233.3666, 0.583192  
59389, 30000, 233.3047, 0.583037  
59390, 29698, 233.2428, 0.582882  
59391, 28892, 233.1808, 0.582728  
59392, 27816, 233.1189, 0.582573  
59393, 26958, 233.0570, 0.582418  
59394, 26600, 232.9951, 0.582263  
59395, 26584, 232.9331, 0.582109  
59396, 26558, 232.8712, 0.581954  
59397, 26428, 232.8093, 0.581799  
59398, 26476, 232.7473, 0.581644  
59399, 27026, 232.6854, 0.581490  
59400, 28024, 232.6235, 0.581335  
59401, 29000, 232.5616, 0.581180  
59402, 29444, 232.4996, 0.581025  
59403, 29258, 232.4377, 0.580871  
59404, 28762, 232.3758, 0.580716  
59405, 28338, 232.3139, 0.580561  
59406, 28106, 232.2519, 0.580406  
59407, 27946, 232.1900, 0.580252  
59408, 27748, 232.1281, 0.580097  
59409, 27642, 232.0662, 0.579942  
59410, 27844, 232.0042, 0.579787  
59411, 28420, 231.9423, 0.579633  
59412, 29128, 231.8804, 0.579478  
59413, 29596, 231.8184, 0.579323  
59414, 29544, 231.7565, 0.579168  
59415, 28956, 231.6946, 0.579014  
59416, 28022, 231.6327, 0.578859  
59417, 27056, 231.5707, 0.578704  
59418, 26340, 231.5088, 0.578549  
59419, 26064, 231.4469, 0.578395  
59420, 26228, 231.3850, 0.578240  
59421, 26624, 231.3230, 0.578085  
59422, 26978, 231.2611, 0.577930  
59423, 27166, 231.1992, 0.577775  
59424, 27296, 231.1372, 0.577621  
59425, 27594, 231.0753, 0.577466  
59426, 28118, 231.0134, 0.577311  
59427, 28660, 230.9515, 0.577156  
59428, 28926, 230.8895, 0.577002  
59429, 28804, 230.8276, 0.576847  
59430, 28476, 230.7657, 0.576692  
59431, 28256, 230.7038, 0.576537  
59432, 28266, 230.6418, 0.576383  
59433, 28370, 230.5799, 0.576228  
59434, 28344, 230.5180, 0.576073  
59435, 28106, 230.4561, 0.575918  
59436, 27744, 230.3941, 0.575764  
59437, 27372, 230.3322, 0.575609  
59438, 27010, 230.2703, 0.575454  
59439, 26624, 230.2083, 0.575299  
59440, 26270, 230.1464, 0.575145  
59441, 26076, 230.0845, 0.574990  
59442, 26116, 230.0226, 0.574835  
59443, 26278, 229.9606, 0.574680  
59444, 26372, 229.8987, 0.574526  
59445, 26360, 229.8368, 0.574371  
59446, 26448, 229.7749, 0.574216  
59447, 26886, 229.7129, 0.574061  
59448, 27696, 229.6510, 0.573907  
59449, 28560, 229.5891, 0.573752  
59450, 29102, 229.5271, 0.573597  
59451, 29176, 229.4652, 0.573442  
59452, 28952, 229.4033, 0.573288  
59453, 28672, 229.3414, 0.573133  
59454, 28390, 229.2794, 0.572978  
59455, 27966, 229.2175, 0.572823  
59456, 27322, 229.1556, 0.572668  
59457, 26620, 229.0937, 0.572514  
59458, 26162, 229.0317, 0.572359  
59459, 26144, 228.9698, 0.572204  
59460, 26484, 228.9079, 0.572049  
59461, 26938, 228.8460, 0.571895  
59462, 27358, 228.7840, 0.571740  
59463, 27742, 228.7221, 0.571585  
59464, 28146, 228.6602, 0.571430  
59465, 28502, 228.5982, 0.571276  
59466, 28644, 228.5363, 0.571121

59467, 28470, 228.4744, 0.570966  
59468, 28056, 228.4125, 0.570811  
59469, 27608, 228.3505, 0.570657  
59470, 27306, 228.2886, 0.570502  
59471, 27208, 228.2267, 0.570347  
59472, 27256, 228.1648, 0.570192  
59473, 27358, 228.1028, 0.570038  
59474, 27412, 228.0409, 0.569883  
59475, 27302, 227.9790, 0.569728  
59476, 27022, 227.9170, 0.569573  
59477, 26738, 227.8551, 0.569419  
59478, 26748, 227.7932, 0.569264  
59479, 27260, 227.7313, 0.569109  
59480, 28136, 227.6693, 0.568954  
59481, 28904, 227.6074, 0.568800  
59482, 29130, 227.5455, 0.568645  
59483, 28748, 227.4836, 0.568490  
59484, 28130, 227.4216, 0.568335  
59485, 27700, 227.3597, 0.568181  
59486, 26752, 227.2978, 0.568026  
59487, 27416, 227.2359, 0.567871  
59488, 27050, 227.1739, 0.567716  
59489, 26546, 227.1120, 0.567561  
59490, 26290, 227.0501, 0.567407  
59491, 26550, 226.9881, 0.567252  
59492, 27162, 226.9262, 0.567097  
59493, 27686, 226.8643, 0.566942  
59494, 27828, 226.8024, 0.566788  
59495, 27742, 226.7404, 0.566633  
59496, 27828, 226.6785, 0.566478  
59497, 28324, 226.6166, 0.566323  
59498, 29054, 226.5547, 0.566169  
59499, 29602, 226.4927, 0.566014  
59500, 29724, 226.4308, 0.565859  
59501, 29538, 226.3689, 0.565704  
59502, 29384, 226.3070, 0.565550  
59503, 29488, 226.2450, 0.565395  
59504, 29796, 226.1831, 0.565240  
59505, 30062, 226.1212, 0.565085  
59506, 30068, 226.0592, 0.564931  
59507, 29740, 225.9973, 0.564776  
59508, 29164, 225.9354, 0.564621  
59509, 28512, 225.8735, 0.564466  
59510, 28002, 225.8115, 0.564312  
59511, 27792, 225.7496, 0.564157  
59512, 27918, 225.6877, 0.564002  
59513, 28230, 225.6258, 0.563847  
59514, 28510, 225.5638, 0.563693  
59515, 28626, 225.5019, 0.563538  
59516, 28628, 225.4400, 0.563383  
59517, 28636, 225.3780, 0.563228  
59518, 28646, 225.3161, 0.563074  
59519, 28544, 225.2542, 0.562919  
59520, 28212, 225.1923, 0.562764  
59521, 27746, 225.1303, 0.562609  
59522, 27414, 225.0684, 0.562454  
59523, 27408, 225.0065, 0.562300  
59524, 27662, 224.9446, 0.562145  
59525, 27888, 224.8826, 0.561990  
59526, 27894, 224.8207, 0.561835  
59527, 27766, 224.7588, 0.561681  
59528, 27764, 224.6969, 0.561526  
59529, 28064, 224.6349, 0.561371  
59530, 28562, 224.5730, 0.561216  
59531, 29024, 224.5111, 0.561062  
59532, 29298, 224.4491, 0.560907  
59533, 29400, 224.3872, 0.560752  
59534, 29382, 224.3253, 0.560597  
59535, 29218, 224.2634, 0.560443  
59536, 28822, 224.2014, 0.560288  
59537, 28272, 224.1395, 0.560133  
59538, 27824, 224.0776, 0.559978  
59539, 27762, 224.0157, 0.559824  
59540, 28108, 223.9537, 0.559669  
59541, 28620, 223.8918, 0.559514  
59542, 29026, 223.8299, 0.559359

59543, 29304, 223.7679, 0.559205  
59544, 29626, 223.7060, 0.559050  
59545, 30100, 223.6441, 0.558895  
59546, 30592, 223.5822, 0.558740  
59547, 30830, 223.5202, 0.558586  
59548, 30730, 223.4583, 0.558431  
59549, 30530, 223.3964, 0.558276  
59550, 30520, 223.3345, 0.558121  
59551, 30708, 223.2725, 0.557967  
59552, 30774, 223.2106, 0.557812  
59553, 30402, 223.1487, 0.557657  
59554, 29676, 223.0868, 0.557502  
59555, 29080, 223.0248, 0.557347  
59556, 29092, 222.9629, 0.557193  
59557, 29714, 222.9010, 0.557038  
59558, 30464, 222.8390, 0.556883  
59559, 30758, 222.7771, 0.556728  
59560, 30412, 222.7152, 0.556574  
59561, 29716, 222.6533, 0.556419  
59562, 29142, 222.5913, 0.556264  
59563, 28926, 222.5294, 0.556109  
59564, 28956, 222.4675, 0.555955  
59565, 28954, 222.4056, 0.555800  
59566, 28760, 222.3436, 0.555645  
59567, 28462, 222.2817, 0.555490  
59568, 28288, 222.2198, 0.555336  
59569, 28434, 222.1578, 0.555181  
59570, 28894, 222.0959, 0.555026  
59571, 29470, 222.0340, 0.554871  
59572, 29874, 221.9721, 0.554717  
59573, 29918, 221.9101, 0.554562  
59574, 29668, 221.8482, 0.554407  
59575, 29436, 221.7863, 0.554252  
59576, 29538, 221.7244, 0.554098  
59577, 30064, 221.6624, 0.553943  
59578, 30776, 221.6005, 0.553788  
59579, 31306, 221.5386, 0.553633  
59580, 31436, 221.4767, 0.553479  
59581, 31226, 221.4147, 0.553324  
59582, 30846, 221.3528, 0.553169  
59583, 30354, 221.2909, 0.553014  
59584, 29650, 221.2289, 0.552860  
59585, 28694, 221.1670, 0.552705  
59586, 27684, 221.1051, 0.552550  
59587, 26990, 221.0432, 0.552395  
59588, 26836, 220.9812, 0.552240  
59589, 27068, 220.9193, 0.552086  
59590, 27302, 220.8574, 0.551931  
59591, 27284, 220.7955, 0.551776  
59592, 27126, 220.7335, 0.551621  
59593, 27134, 220.6716, 0.551467  
59594, 27424, 220.6097, 0.551312  
59595, 27764, 220.5477, 0.551157  
59596, 27798, 220.4858, 0.551002  
59597, 27460, 220.4239, 0.550848  
59598, 27094, 220.3620, 0.550693  
59599, 27196, 220.3000, 0.550538  
59600, 27942, 220.2381, 0.550383  
59601, 29036, 220.1762, 0.550229  
59602, 29924, 220.1143, 0.550074  
59603, 30190, 220.0523, 0.549919  
59604, 29776, 219.9904, 0.549764  
59605, 28896, 219.9285, 0.549610  
59606, 27852, 219.8666, 0.549455  
59607, 26908, 219.8046, 0.549300  
59608, 26278, 219.7427, 0.549145  
59609, 26108, 219.6808, 0.548991  
59610, 26392, 219.6188, 0.548836  
59611, 26972, 219.5569, 0.548681  
59612, 27586, 219.4950, 0.548526  
59613, 28070, 219.4331, 0.548372  
59614, 28440, 219.3711, 0.548217  
59615, 28808, 219.3092, 0.548062  
59616, 29234, 219.2473, 0.547907  
59617, 29644, 219.1854, 0.547753  
59618, 29900, 219.1234, 0.547598

59619, 29916, 219.0615, 0.547443  
59620, 29696, 218.9996, 0.547288  
59621, 29274, 218.9376, 0.547133  
59622, 28672, 218.8757, 0.546979  
59623, 27942, 218.8138, 0.546824  
59624, 27180, 218.7519, 0.546669  
59625, 26526, 218.6899, 0.546514  
59626, 26086, 218.6280, 0.546360  
59627, 25900, 218.5661, 0.546205  
59628, 25980, 218.5042, 0.546050  
59629, 26326, 218.4422, 0.545895  
59630, 26882, 218.3803, 0.545741  
59631, 27442, 218.3184, 0.545586  
59632, 27696, 218.2565, 0.545431  
59633, 27462, 218.1945, 0.545276  
59634, 26878, 218.1326, 0.545122  
59635, 26370, 218.0707, 0.544967  
59636, 26336, 218.0087, 0.544812  
59637, 26798, 217.9468, 0.544657  
59638, 27408, 217.8849, 0.544503  
59639, 27790, 217.8230, 0.544348  
59640, 27900, 217.7610, 0.544193  
59641, 28034, 217.6991, 0.544038  
59642, 28450, 217.6372, 0.543884  
59643, 29056, 217.5753, 0.543729  
59644, 29476, 217.5133, 0.543574  
59645, 29428, 217.4514, 0.543419  
59646, 28990, 217.3895, 0.543265  
59647, 28520, 217.3275, 0.543110  
59648, 28244, 217.2656, 0.542955  
59649, 28040, 217.2037, 0.542800  
59650, 27618, 217.1418, 0.542646  
59651, 26910, 217.0798, 0.542491  
59652, 26222, 217.0179, 0.542336  
59653, 25992, 216.9560, 0.542181  
59654, 26360, 216.8941, 0.542026  
59655, 27050, 216.8321, 0.541872  
59656, 27622, 216.7702, 0.541717  
59657, 27868, 216.7083, 0.541562  
59658, 27910, 216.6464, 0.541407  
59659, 28012, 216.5844, 0.541253  
59660, 28274, 216.5225, 0.541098  
59661, 28548, 216.4606, 0.540943  
59662, 28620, 216.3986, 0.540788  
59663, 28432, 216.3367, 0.540634  
59664, 28164, 216.2748, 0.540479  
59665, 28082, 216.2129, 0.540324  
59666, 28406, 216.1509, 0.540169  
59667, 29154, 216.0890, 0.540015  
59668, 30152, 216.0271, 0.539860  
59669, 31080, 215.9652, 0.539705  
59670, 31596, 215.9032, 0.539550  
59671, 31514, 215.8413, 0.539396  
59672, 30910, 215.7794, 0.539241  
59673, 30108, 215.7174, 0.539086  
59674, 29436, 215.6555, 0.538931  
59675, 29052, 215.5936, 0.538777  
59676, 28926, 215.5317, 0.538622  
59677, 28976, 215.4697, 0.538467  
59678, 29194, 215.4078, 0.538312  
59679, 29616, 215.3459, 0.538158  
59680, 30120, 215.2840, 0.538003  
59681, 30438, 215.2220, 0.537848  
59682, 30330, 215.1601, 0.537693  
59683, 29822, 215.0982, 0.537538  
59684, 29246, 215.0363, 0.537384  
59685, 28944, 214.9743, 0.537229  
59686, 28944, 214.9124, 0.537074  
59687, 28920, 214.8505, 0.536919  
59688, 28524, 214.7885, 0.536765  
59689, 27730, 214.7266, 0.536610  
59690, 26888, 214.6647, 0.536455  
59691, 26424, 214.6028, 0.536300  
59692, 26498, 214.5408, 0.536146  
59693, 26888, 214.4789, 0.535991  
59694, 27230, 214.4170, 0.535836

59695, 27262, 214.3551, 0.535681  
59696, 26974, 214.2931, 0.535527  
59697, 26494, 214.2312, 0.535372  
59698, 25968, 214.1693, 0.535217  
59699, 25482, 214.1073, 0.535062  
59700, 25076, 214.0454, 0.534908  
59701, 24784, 213.9835, 0.534753  
59702, 24642, 213.9216, 0.534598  
59703, 24710, 213.8596, 0.534443  
59704, 25092, 213.7977, 0.534289  
59705, 25860, 213.7358, 0.534134  
59706, 26950, 213.6739, 0.533979  
59707, 28068, 213.6119, 0.533824  
59708, 28868, 213.5500, 0.533670  
59709, 29198, 213.4881, 0.533515  
59710, 29228, 213.4262, 0.533360  
59711, 29302, 213.3642, 0.533205  
59712, 29568, 213.3023, 0.533051  
59713, 29826, 213.2404, 0.532896  
59714, 29746, 213.1784, 0.532741  
59715, 29276, 213.1165, 0.532586  
59716, 28782, 213.0546, 0.532431  
59717, 28764, 212.9927, 0.532277  
59718, 29362, 212.9307, 0.532122  
59719, 30174, 212.8688, 0.531967  
59720, 30628, 212.8069, 0.531812  
59721, 30462, 212.7450, 0.531658  
59722, 29904, 212.6830, 0.531503  
59723, 29358, 212.6211, 0.531348  
59724, 28964, 212.5592, 0.531193  
59725, 28524, 212.4973, 0.531039  
59726, 27790, 212.4353, 0.530884  
59727, 26834, 212.3734, 0.530729  
59728, 25990, 212.3115, 0.530574  
59729, 25534, 212.2495, 0.530420  
59730, 25466, 212.1876, 0.530265  
59731, 25582, 212.1257, 0.530110  
59732, 25800, 212.0638, 0.529955  
59733, 26242, 212.0018, 0.529801  
59734, 27010, 211.9399, 0.529646  
59735, 27922, 211.8780, 0.529491  
59736, 28534, 211.8161, 0.529336  
59737, 28516, 211.7541, 0.529182  
59738, 27964, 211.6922, 0.529027  
59739, 27330, 211.6303, 0.528872  
59740, 27034, 211.5683, 0.528717  
59741, 27142, 211.5064, 0.528563  
59742, 27424, 211.4445, 0.528408  
59743, 27632, 211.3826, 0.528253  
59744, 27750, 211.3206, 0.528098  
59745, 27896, 211.2587, 0.527944  
59746, 28130, 211.1968, 0.527789  
59747, 28368, 211.1349, 0.527634  
59748, 28520, 211.0729, 0.527479  
59749, 28636, 211.0110, 0.527324  
59750, 28872, 210.9491, 0.527170  
59751, 29284, 210.8872, 0.527015  
59752, 29734, 210.8252, 0.526860  
59753, 30020, 210.7633, 0.526705  
59754, 30040, 210.7014, 0.526551  
59755, 29882, 210.6394, 0.526396  
59756, 29676, 210.5775, 0.526241  
59757, 29484, 210.5156, 0.526086  
59758, 29282, 210.4537, 0.525932  
59759, 29056, 210.3917, 0.525777  
59760, 28818, 210.3298, 0.525622  
59761, 28604, 210.2679, 0.525467  
59762, 28346, 210.2060, 0.525313  
59763, 27994, 210.1440, 0.525158  
59764, 27618, 210.0821, 0.525003  
59765, 27434, 210.0202, 0.524848  
59766, 27610, 209.9582, 0.524694  
59767, 28086, 209.8963, 0.524539  
59768, 28582, 209.8344, 0.524384  
59769, 28842, 209.7725, 0.524229  
59770, 28880, 209.7105, 0.524075  
59771, 28954, 209.6486, 0.523920  
59772, 29264, 209.5867, 0.523765  
59773, 29768, 209.5248, 0.523610  
59774, 30238, 209.4628, 0.523456  
59775, 30532, 209.4009, 0.523301  
59776, 30728, 209.3390, 0.523146  
59777, 31006, 209.2771, 0.522991  
59778, 31406, 209.2151, 0.522837  
59779, 31776, 209.1532, 0.522682  
59780, 31942, 209.0913, 0.522527  
59781, 31908, 209.0293, 0.522372  
59782, 31834, 208.9674, 0.522217  
59783, 31812, 208.9055, 0.522063  
59784, 31758, 208.8436, 0.521908  
59785, 31516, 208.7816, 0.521753  
59786, 31102, 208.7197, 0.521598  
59787, 30686, 208.6578, 0.521444  
59788, 30418, 208.5959, 0.521289  
59789, 30200, 208.5339, 0.521134  
59790, 29792, 208.4720, 0.520979  
59791, 29108, 208.4101, 0.520825  
59792, 28356, 208.3481, 0.520670  
59793, 27866, 208.2862, 0.520515  
59794, 27742, 208.2243, 0.520360  
59795, 27740, 208.1624, 0.520206  
59796, 27570, 208.1004, 0.520051  
59797, 27248, 208.0385, 0.519896  
59798, 27162, 207.9766, 0.519741  
59799, 27668, 207.9147, 0.519587  
59800, 28730, 207.8527, 0.519432  
59801, 29854, 207.7908, 0.519277  
59802, 30494, 207.7289, 0.519122  
59803, 30464, 207.6670, 0.518968  
59804, 29992, 207.6050, 0.518813  
59805, 29442, 207.5431, 0.518658  
59806, 29042, 207.4812, 0.518503  
59807, 28842, 207.4192, 0.518349  
59808, 28862, 207.3573, 0.518194  
59809, 29140, 207.2954, 0.518039  
59810, 29638, 207.2335, 0.517884  
59811, 30162, 207.1715, 0.517730  
59812, 30452, 207.1096, 0.517575  
59813, 30408, 207.0477, 0.517420  
59814, 30134, 206.9858, 0.517265  
59815, 29816, 206.9238, 0.517110  
59816, 29494, 206.8619, 0.516956  
59817, 29112, 206.8000, 0.516801  
59818, 28660, 206.7380, 0.516646  
59819, 28350, 206.6761, 0.516491  
59820, 28406, 206.6142, 0.516337  
59821, 28848, 206.5523, 0.516182  
59822, 29410, 206.4903, 0.516027  
59823, 29804, 206.4284, 0.515872  
59824, 30008, 206.3665, 0.515718  
59825, 30254, 206.3046, 0.515563  
59826, 30682, 206.2426, 0.515408  
59827, 31110, 206.1807, 0.515253  
59828, 31158, 206.1188, 0.515099  
59829, 30706, 206.0569, 0.514944  
59830, 30114, 205.9949, 0.514789  
59831, 29932, 205.9330, 0.514634  
59832, 30346, 205.8711, 0.514480  
59833, 30994, 205.8091, 0.514325  
59834, 31256, 205.7472, 0.514170  
59835, 30902, 205.6853, 0.514015  
59836, 30262, 205.6234, 0.513861  
59837, 29892, 205.5614, 0.513706  
59838, 29986, 205.4995, 0.513551  
59839, 30236, 205.4376, 0.513396  
59840, 30178, 205.3757, 0.513242  
59841, 29668, 205.3137, 0.513087  
59842, 29002, 205.2518, 0.512932  
59843, 28592, 205.1899, 0.512777  
59844, 28630, 205.1279, 0.512623  
59845, 28994, 205.0660, 0.512468  
59846, 29468, 205.0041, 0.512313  
59847, 29924, 204.9422, 0.512158  
59848, 30282, 204.8802, 0.512003  
59849, 30424, 204.8183, 0.511849  
59850, 30236, 204.7564, 0.511694  
59851, 29766, 204.6945, 0.511539  
59852, 29276, 204.6325, 0.511384  
59853, 29060, 204.5706, 0.511230  
59854, 29170, 204.5087, 0.511075  
59855, 29342, 204.4468, 0.510920  
59856, 29270, 204.3848, 0.510765  
59857, 28888, 204.3229, 0.510611  
59858, 28418, 204.2610, 0.510456  
59859, 28130, 204.1990, 0.510301  
59860, 28098, 204.1371, 0.510146  
59861, 28220, 204.0752, 0.509992  
59862, 28412, 204.0133, 0.509837  
59863, 28714, 203.9513, 0.509682  
59864, 29170, 203.8894, 0.509527  
59865, 29642, 203.8275, 0.509373  
59866, 29886, 203.7656, 0.509218  
59867, 29776, 203.7036, 0.509063  
59868, 29514, 203.6417, 0.508908  
59869, 29472, 203.5798, 0.508754  
59870, 29810, 203.5178, 0.508599  
59871, 30334, 203.4559, 0.508444  
59872, 30658, 203.3940, 0.508289  
59873, 30620, 203.3321, 0.508135  
59874, 30436, 203.2701, 0.507980  
59875, 30450, 203.2082, 0.507825  
59876, 30750, 203.1463, 0.507670  
59877, 31080, 203.0844, 0.507516  
59878, 31086, 203.0224, 0.507361  
59879, 30708, 202.9605, 0.507206  
59880, 30196, 202.8986, 0.507051  
59881, 29886, 202.8367, 0.506896  
59882, 29900, 202.7747, 0.506742  
59883, 30114, 202.7128, 0.506587  
59884, 30368, 202.6509, 0.506432  
59885, 30634, 202.5889, 0.506277  
59886, 30976, 202.5270, 0.506123  
59887, 31382, 202.4651, 0.505968  
59888, 31684, 202.4032, 0.505813  
59889, 31698, 202.3412, 0.505658  
59890, 31366, 202.2793, 0.505504  
59891, 30810, 202.2174, 0.505349  
59892, 30214, 202.1555, 0.505194  
59893, 29688, 202.0935, 0.505039  
59894, 29268, 202.0316, 0.504885  
59895, 28946, 201.9697, 0.504730  
59896, 28708, 201.9077, 0.504575  
59897, 28516, 201.8458, 0.504420  
59898, 28290, 201.7839, 0.504266  
59899, 28004, 201.7220, 0.504111  
59900, 27752, 201.6600, 0.503956  
59901, 27692, 201.5981, 0.503801  
59902, 27938, 201.5362, 0.503647  
59903, 28440, 201.4743, 0.503492  
59904, 29004, 201.4123, 0.503337  
59905, 29466, 201.3504, 0.503182  
59906, 29750, 201.2885, 0.503028  
59907, 29870, 201.2266, 0.502873  
59908, 29810, 201.1646, 0.502718  
59909, 29570, 201.1027, 0.502563  
59910, 29200, 201.0408, 0.502409  
59911, 28848, 200.9788, 0.502254  
59912, 28656, 200.9169, 0.502099  
59913, 28656, 200.8550, 0.501944  
59914, 28740, 200.7931, 0.501789  
59915, 28852, 200.7311, 0.501635  
59916, 29072, 200.6692, 0.501480  
59917, 29566, 200.6073, 0.501325  
59918, 30326, 200.5454, 0.501170  
59919, 31066, 200.4834, 0.501016  
59920, 31378, 200.4215, 0.500861  
59921, 31056, 200.3596, 0.500706  
59922, 30268, 200.2977, 0.500551

59923, 29390, 200.2357, 0.500397  
59924, 28708, 200.1738, 0.500242  
59925, 28248, 200.1119, 0.500087  
59926, 27926, 200.0499, 0.499932  
59927, 27730, 199.9880, 0.499778  
59928, 27780, 199.9261, 0.499623  
59929, 28166, 199.8642, 0.499468  
59930, 28788, 199.8022, 0.499313  
59931, 29436, 199.7403, 0.499159  
59932, 30004, 199.6784, 0.499004  
59933, 30540, 199.6165, 0.498849  
59934, 31136, 199.5545, 0.498694  
59935, 31682, 199.4926, 0.498540  
59936, 31926, 199.4307, 0.498385  
59937, 31680, 199.3687, 0.498230  
59938, 31044, 199.3068, 0.498075  
59939, 30326, 199.2449, 0.497921  
59940, 29774, 199.1830, 0.497766  
59941, 29406, 199.1210, 0.497611  
59942, 29098, 199.0591, 0.497456  
59943, 28826, 198.9972, 0.497302  
59944, 28732, 198.9353, 0.497147  
59945, 28932, 198.8733, 0.496992  
59946, 29318, 198.8114, 0.496837  
59947, 29590, 198.7495, 0.496682  
59948, 29534, 198.6876, 0.496528  
59949, 29194, 198.6256, 0.496373  
59950, 28798, 198.5637, 0.496218  
59951, 28488, 198.5018, 0.496063  
59952, 28214, 198.4398, 0.495909  
59953, 27904, 198.3779, 0.495754  
59954, 27652, 198.3160, 0.495599  
59955, 27692, 198.2541, 0.495444  
59956, 28100, 198.1921, 0.495290  
59957, 28612, 198.1302, 0.495135  
59958, 28806, 198.0683, 0.494980  
59959, 28528, 198.0064, 0.494825  
59960, 28100, 197.9444, 0.494671  
59961, 28072, 197.8825, 0.494516  
59962, 28738, 197.8206, 0.494361  
59963, 29874, 197.7586, 0.494206  
59964, 30940, 197.6967, 0.494052  
59965, 31554, 197.6348, 0.493897  
59966, 31706, 197.5729, 0.493742  
59967, 31626, 197.5109, 0.493587  
59968, 31486, 197.4490, 0.493433  
59969, 31260, 197.3871, 0.493278  
59970, 30904, 197.3252, 0.493123  
59971, 30492, 197.2632, 0.492968  
59972, 30178, 197.2013, 0.492814  
59973, 30002, 197.1394, 0.492659  
59974, 29852, 197.0775, 0.492504  
59975, 29598, 197.0155, 0.492349  
59976, 29302, 196.9536, 0.492194  
59977, 29174, 196.8917, 0.492040  
59978, 29384, 196.8297, 0.491885  
59979, 29876, 196.7678, 0.491730  
59980, 30416, 196.7059, 0.491575  
59981, 30794, 196.6440, 0.491421  
59982, 30922, 196.5820, 0.491266  
59983, 30816, 196.5201, 0.491111  
59984, 30450, 196.4582, 0.490956  
59985, 29836, 196.3963, 0.490802  
59986, 29136, 196.3343, 0.490647  
59987, 28652, 196.2724, 0.490492  
59988, 28608, 196.2105, 0.490337  
59989, 28898, 196.1485, 0.490183  
59990, 29128, 196.0866, 0.490028  
59991, 28936, 196.0247, 0.489873  
59992, 28344, 195.9628, 0.489718  
59993, 27750, 195.9008, 0.489564  
59994, 27608, 195.8389, 0.489409  
59995, 28028, 195.7770, 0.489254  
59996, 28770, 195.7151, 0.489099  
59997, 29484, 195.6531, 0.488945  
59998, 29944, 195.5912, 0.488790

59999, 30078, 195.5293, 0.488635  
60000, 29854, 195.4674, 0.488480  
60001, 29304, 195.4054, 0.488326  
60002, 28596, 195.3435, 0.488171  
60003, 28108, 195.2816, 0.488016  
60004, 28188, 195.2196, 0.487861  
60005, 28836, 195.1577, 0.487707  
60006, 29618, 195.0958, 0.487552  
60007, 29998, 195.0339, 0.487397  
60008, 29782, 194.9719, 0.487242  
60009, 29256, 194.9100, 0.487087  
60010, 28876, 194.8481, 0.486933  
60011, 28870, 194.7862, 0.486778  
60012, 29084, 194.7242, 0.486623  
60013, 29254, 194.6623, 0.486468  
60014, 29280, 194.6004, 0.486314  
60015, 29240, 194.5384, 0.486159  
60016, 29206, 194.4765, 0.486004  
60017, 29100, 194.4146, 0.485849  
60018, 28860, 194.3527, 0.485695  
60019, 28642, 194.2907, 0.485540  
60020, 28760, 194.2288, 0.485385  
60021, 29364, 194.1669, 0.485230  
60022, 30138, 194.1050, 0.485076  
60023, 30512, 194.0430, 0.484921  
60024, 30144, 193.9811, 0.484766  
60025, 29270, 193.9192, 0.484611  
60026, 28522, 193.8573, 0.484457  
60027, 28378, 193.7953, 0.484302  
60028, 28750, 193.7334, 0.484147  
60029, 29152, 193.6715, 0.483992  
60030, 29158, 193.6095, 0.483838  
60031, 28784, 193.5476, 0.483683  
60032, 28410, 193.4857, 0.483528  
60033, 28396, 193.4238, 0.483373  
60034, 28828, 193.3618, 0.483219  
60035, 29534, 193.2999, 0.483064  
60036, 30272, 193.2380, 0.482909  
60037, 30848, 193.1761, 0.482754  
60038, 31140, 193.1141, 0.482600  
60039, 31078, 193.0522, 0.482445  
60040, 30726, 192.9903, 0.482290  
60041, 30290, 192.9283, 0.482135  
60042, 30004, 192.8664, 0.481980  
60043, 29950, 192.8045, 0.481826  
60044, 29990, 192.7426, 0.481671  
60045, 29922, 192.6806, 0.481516  
60046, 29710, 192.6187, 0.481361  
60047, 29502, 192.5568, 0.481207  
60048, 29462, 192.4949, 0.481052  
60049, 29566, 192.4329, 0.480897  
60050, 29636, 192.3710, 0.480742  
60051, 29520, 192.3091, 0.480588  
60052, 29264, 192.2472, 0.480433  
60053, 29008, 192.1852, 0.480278  
60054, 28832, 192.1233, 0.480123  
60055, 28700, 192.0614, 0.479969  
60056, 28598, 191.9994, 0.479814  
60057, 28656, 191.9375, 0.479659  
60058, 29018, 191.8756, 0.479504  
60059, 29624, 191.8137, 0.479350  
60060, 30186, 191.7517, 0.479195  
60061, 30416, 191.6898, 0.479040  
60062, 30368, 191.6279, 0.478885  
60063, 30428, 191.5660, 0.478731  
60064, 30914, 191.5040, 0.478576  
60065, 31700, 191.4421, 0.478421  
60066, 32268, 191.3802, 0.478266  
60067, 32160, 191.3182, 0.478112  
60068, 31426, 191.2563, 0.477957  
60069, 30574, 191.1944, 0.477802  
60070, 30106, 191.1325, 0.477647  
60071, 30132, 191.0705, 0.477493  
60072, 30412, 191.0086, 0.477338  
60073, 30736, 190.9467, 0.477183  
60074, 31130, 190.8848, 0.477028

60075, 31720, 190.8228, 0.476873  
60076, 32438, 190.7609, 0.476719  
60077, 32974, 190.6990, 0.476564  
60078, 33058, 190.6371, 0.476409  
60079, 32730, 190.5751, 0.476254  
60080, 32302, 190.5132, 0.476100  
60081, 32030, 190.4513, 0.475945  
60082, 31894, 190.3893, 0.475790  
60083, 31726, 190.3274, 0.475635  
60084, 31500, 190.2655, 0.475481  
60085, 31376, 190.2036, 0.475326  
60086, 31458, 190.1416, 0.475171  
60087, 31552, 190.0797, 0.475016  
60088, 31254, 190.0178, 0.474862  
60089, 30376, 189.9559, 0.474707  
60090, 29188, 189.8939, 0.474552  
60091, 28252, 189.8320, 0.474397  
60092, 27914, 189.7701, 0.474243  
60093, 28052, 189.7081, 0.474088  
60094, 28266, 189.6462, 0.473933  
60095, 28332, 189.5843, 0.473778  
60096, 28368, 189.5224, 0.473624  
60097, 28588, 189.4604, 0.473469  
60098, 28948, 189.3985, 0.473314  
60099, 29158, 189.3366, 0.473159  
60100, 29008, 189.2747, 0.473005  
60101, 28640, 189.2127, 0.472850  
60102, 28456, 189.1508, 0.472695  
60103, 28676, 189.0889, 0.472540  
60104, 29106, 189.0270, 0.472386  
60105, 29342, 188.9650, 0.472231  
60106, 29194, 188.9031, 0.472076  
60107, 28884, 188.8412, 0.471921  
60108, 28788, 188.7792, 0.471766  
60109, 29042, 188.7173, 0.471612  
60110, 29414, 188.6554, 0.471457  
60111, 29572, 188.5935, 0.471302  
60112, 29396, 188.5315, 0.471147  
60113, 29086, 188.4696, 0.470993  
60114, 28918, 188.4077, 0.470838  
60115, 29020, 188.3458, 0.470683  
60116, 29354, 188.2838, 0.470528  
60117, 29820, 188.2219, 0.470374  
60118, 30346, 188.1600, 0.470219  
60119, 30842, 188.0980, 0.470064  
60120, 31172, 188.0361, 0.469909  
60121, 31232, 187.9742, 0.469755  
60122, 31082, 187.9123, 0.469600  
60123, 30934, 187.8503, 0.469445  
60124, 30912, 187.7884, 0.469290  
60125, 30924, 187.7265, 0.469136  
60126, 30702, 187.6646, 0.468981  
60127, 30128, 187.6026, 0.468826  
60128, 29420, 187.5407, 0.468671  
60129, 28984, 187.4788, 0.468517  
60130, 29030, 187.4169, 0.468362  
60131, 29340, 187.3549, 0.468207  
60132, 29432, 187.2930, 0.468052  
60133, 28990, 187.2311, 0.467898  
60134, 28138, 187.1691, 0.467743  
60135, 27330, 187.1072, 0.467588  
60136, 26982, 187.0453, 0.467433  
60137, 27186, 186.9834, 0.467279  
60138, 27744, 186.9214, 0.467124  
60139, 28388, 186.8595, 0.466969  
60140, 28954, 186.7976, 0.466814  
60141, 29420, 186.7357, 0.466659  
60142, 29836, 186.6737, 0.466505  
60143, 30240, 186.6118, 0.466350  
60144, 30642, 186.5499, 0.466195  
60145, 30998, 186.4880, 0.466040  
60146, 31224, 186.4260, 0.465886  
60147, 31242, 186.3641, 0.465731  
60148, 31058, 186.3022, 0.465576  
60149, 30788, 186.2402, 0.465421  
60150, 30540, 186.1783, 0.465267

60151, 30288, 186.1164, 0.465112  
60152, 29882, 186.0545, 0.464957  
60153, 29248, 185.9925, 0.464802  
60154, 28552, 185.9306, 0.464648  
60155, 28140, 185.8687, 0.464493  
60156, 28228, 185.8068, 0.464338  
60157, 28654, 185.7448, 0.464183  
60158, 28968, 185.6829, 0.464029  
60159, 28852, 185.6210, 0.463874  
60160, 28446, 185.5590, 0.463719  
60161, 28272, 185.4971, 0.463564  
60162, 28726, 185.4352, 0.463410  
60163, 29726, 185.3733, 0.463255  
60164, 30726, 185.3113, 0.463100  
60165, 31174, 185.2494, 0.462945  
60166, 30922, 185.1875, 0.462791  
60167, 30276, 185.1256, 0.462636  
60168, 29654, 185.0636, 0.462481  
60169, 29290, 185.0017, 0.462326  
60170, 29160, 184.9398, 0.462172  
60171, 29146, 184.8779, 0.462017  
60172, 29208, 184.8159, 0.461862  
60173, 29356, 184.7540, 0.461707  
60174, 29568, 184.6921, 0.461552  
60175, 29760, 184.6301, 0.461398  
60176, 29882, 184.5682, 0.461243  
60177, 29966, 184.5063, 0.461088  
60178, 30118, 184.4444, 0.460933  
60179, 30412, 184.3824, 0.460779  
60180, 30826, 184.3205, 0.460624  
60181, 31266, 184.2586, 0.460469  
60182, 31610, 184.1967, 0.460314  
60183, 31726, 184.1347, 0.460160  
60184, 31530, 184.0728, 0.460005  
60185, 31016, 184.0109, 0.459850  
60186, 30330, 183.9489, 0.459695  
60187, 29696, 183.8870, 0.459541  
60188, 29270, 183.8251, 0.459386  
60189, 29010, 183.7632, 0.459231  
60190, 28706, 183.7012, 0.459076  
60191, 28192, 183.6393, 0.458922  
60192, 27500, 183.5774, 0.458767  
60193, 26818, 183.5155, 0.458612  
60194, 26282, 183.4535, 0.458457  
60195, 25874, 183.3916, 0.458303  
60196, 25504, 183.3297, 0.458148  
60197, 25200, 183.2678, 0.457993  
60198, 25118, 183.2058, 0.457838  
60199, 25380, 183.1439, 0.457684  
60200, 25892, 183.0820, 0.457529  
60201, 26408, 183.0200, 0.457374  
60202, 26784, 182.9581, 0.457219  
60203, 27114, 182.8962, 0.457065  
60204, 27582, 182.8343, 0.456910  
60205, 28172, 182.7723, 0.456755  
60206, 28622, 182.7104, 0.456600  
60207, 28660, 182.6485, 0.456445  
60208, 28348, 182.5866, 0.456291  
60209, 28078, 182.5246, 0.456136  
60210, 28210, 182.4627, 0.455981  
60211, 28706, 182.4008, 0.455826  
60212, 29214, 182.3388, 0.455672  
60213, 29430, 182.2769, 0.455517  
60214, 29432, 182.2150, 0.455362  
60215, 29530, 182.1531, 0.455207  
60216, 29860, 182.0911, 0.455053  
60217, 30186, 182.0292, 0.454898  
60218, 30146, 181.9673, 0.454743  
60219, 29672, 181.9054, 0.454588  
60220, 29058, 181.8434, 0.454434  
60221, 28676, 181.7815, 0.454279  
60222, 28572, 181.7196, 0.454124  
60223, 28538, 181.6577, 0.453969  
60224, 28486, 181.5957, 0.453815  
60225, 28658, 181.5338, 0.453660  
60226, 29392, 181.4719, 0.453505  
60227, 30606, 181.4099, 0.453350  
60228, 31672, 181.3480, 0.453196  
60229, 31896, 181.2861, 0.453041  
60230, 31186, 181.2242, 0.452886  
60231, 30200, 181.1622, 0.452731  
60232, 29770, 181.1003, 0.452577  
60233, 30176, 181.0384, 0.452422  
60234, 30954, 180.9765, 0.452267  
60235, 31414, 180.9145, 0.452112  
60236, 31288, 180.8526, 0.451958  
60237, 30868, 180.7907, 0.451803  
60238, 30594, 180.7287, 0.451648  
60239, 30566, 180.6668, 0.451493  
60240, 30570, 180.6049, 0.451338  
60241, 30378, 180.5430, 0.451184  
60242, 30032, 180.4810, 0.451029  
60243, 29660, 180.4191, 0.450874  
60244, 29260, 180.3572, 0.450719  
60245, 28652, 180.2953, 0.450565  
60246, 27780, 180.2333, 0.450410  
60247, 26944, 180.1714, 0.450255  
60248, 26630, 180.1095, 0.450100  
60249, 27030, 180.0476, 0.449946  
60250, 27838, 179.9856, 0.449791  
60251, 28484, 179.9237, 0.449636  
60252, 28684, 179.8618, 0.449481  
60253, 28636, 179.7998, 0.449327  
60254, 28758, 179.7379, 0.449172  
60255, 29222, 179.6760, 0.449017  
60256, 29820, 179.6141, 0.448862  
60257, 30232, 179.5521, 0.448708  
60258, 30364, 179.4902, 0.448553  
60259, 30368, 179.4283, 0.448398  
60260, 30358, 179.3664, 0.448243  
60261, 30230, 179.3044, 0.448089  
60262, 29822, 179.2425, 0.447934  
60263, 29212, 179.1806, 0.447779  
60264, 28722, 179.1186, 0.447624  
60265, 28654, 179.0567, 0.447470  
60266, 28938, 178.9948, 0.447315  
60267, 29146, 178.9329, 0.447160  
60268, 28914, 178.8709, 0.447005  
60269, 28262, 178.8090, 0.446850  
60270, 27582, 178.7471, 0.446696  
60271, 27268, 178.6852, 0.446541  
60272, 27424, 178.6232, 0.446386  
60273, 27892, 178.5613, 0.446231  
60274, 28474, 178.4994, 0.446077  
60275, 29074, 178.4375, 0.445922  
60276, 29640, 178.3755, 0.445767  
60277, 30044, 178.3136, 0.445612  
60278, 30134, 178.2517, 0.445458  
60279, 29924, 178.1897, 0.445303  
60280, 29682, 178.1278, 0.445148  
60281, 29728, 178.0659, 0.444993  
60282, 30182, 178.0040, 0.444839  
60283, 30846, 177.9420, 0.444684  
60284, 31406, 177.8801, 0.444529  
60285, 31636, 177.8182, 0.444374  
60286, 31514, 177.7563, 0.444220  
60287, 31102, 177.6943, 0.444065  
60288, 30424, 177.6324, 0.443910  
60289, 29498, 177.5705, 0.443755  
60290, 28484, 177.5085, 0.443601  
60291, 27640, 177.4466, 0.443446  
60292, 27206, 177.3847, 0.443291  
60293, 27216, 177.3228, 0.443136  
60294, 27526, 177.2608, 0.442982  
60295, 27952, 177.1989, 0.442827  
60296, 28378, 177.1370, 0.442672  
60297, 28726, 177.0751, 0.442517  
60298, 28912, 177.0131, 0.442363  
60299, 28854, 176.9512, 0.442208  
60300, 28652, 176.8893, 0.442053  
60301, 28570, 176.8274, 0.441898  
60302, 28874, 176.7654, 0.441743  
60303, 29588, 176.7035, 0.441589  
60304, 30444, 176.6416, 0.441434  
60305, 31132, 176.5796, 0.441279  
60306, 31544, 176.5177, 0.441124  
60307, 31780, 176.4558, 0.440970  
60308, 31900, 176.3939, 0.440815  
60309, 31766, 176.3319, 0.440660  
60310, 31166, 176.2700, 0.440505  
60311, 30130, 176.2081, 0.440351  
60312, 29056, 176.1462, 0.440196  
60313, 28412, 176.0842, 0.440041  
60314, 28316, 176.0223, 0.439886  
60315, 28456, 175.9604, 0.439732  
60316, 28408, 175.8984, 0.439577  
60317, 28106, 175.8365, 0.439422  
60318, 27850, 175.7746, 0.439267  
60319, 27948, 175.7127, 0.439113  
60320, 28334, 175.6507, 0.438958  
60321, 28626, 175.5888, 0.438803  
60322, 28554, 175.5269, 0.438648  
60323, 28270, 175.4650, 0.438494  
60324, 28188, 175.4030, 0.438339  
60325, 28514, 175.3411, 0.438184  
60326, 29012, 175.2792, 0.438029  
60327, 29248, 175.2173, 0.437875  
60328, 29058, 175.1553, 0.437720  
60329, 28722, 175.0934, 0.437565  
60330, 28656, 175.0315, 0.437410  
60331, 28972, 174.9695, 0.437256  
60332, 29388, 174.9076, 0.437101  
60333, 29548, 174.8457, 0.436946  
60334, 29408, 174.7838, 0.436791  
60335, 29210, 174.7218, 0.436636  
60336, 29196, 174.6599, 0.436482  
60337, 29328, 174.5980, 0.436327  
60338, 29370, 174.5361, 0.436172  
60339, 29200, 174.4741, 0.436017  
60340, 28972, 174.4122, 0.435863  
60341, 28962, 174.3503, 0.435708  
60342, 29262, 174.2883, 0.435553  
60343, 29714, 174.2264, 0.435398  
60344, 30088, 174.1645, 0.435244  
60345, 30350, 174.1026, 0.435089  
60346, 30670, 174.0406, 0.434934  
60347, 31232, 173.9787, 0.434779  
60348, 32014, 173.9168, 0.434625  
60349, 32820, 173.8549, 0.434470  
60350, 33430, 173.7929, 0.434315  
60351, 33736, 173.7310, 0.434160  
60352, 33722, 173.6691, 0.434006  
60353, 33398, 173.6072, 0.433851  
60354, 32834, 173.5452, 0.433696  
60355, 32208, 173.4833, 0.433541  
60356, 31762, 173.4214, 0.433387  
60357, 31682, 173.3594, 0.433232  
60358, 31892, 173.2975, 0.433077  
60359, 32130, 173.2356, 0.432922  
60360, 32134, 173.1737, 0.432768  
60361, 31858, 173.1117, 0.432613  
60362, 31478, 173.0498, 0.432458  
60363, 31190, 172.9879, 0.432303  
60364, 31048, 172.9260, 0.432149  
60365, 30966, 172.8640, 0.431994  
60366, 30826, 172.8021, 0.431839  
60367, 30584, 172.7402, 0.431684  
60368, 30270, 172.6783, 0.431529  
60369, 29922, 172.6163, 0.431375  
60370, 29586, 172.5544, 0.431220  
60371, 29332, 172.4925, 0.431065  
60372, 29266, 172.4305, 0.430910  
60373, 29406, 172.3686, 0.430756  
60374, 29620, 172.3067, 0.430601  
60375, 29660, 172.2448, 0.430446  
60376, 29332, 172.1828, 0.430291  
60377, 28652, 172.1209, 0.430137  
60378, 27834, 172.0590, 0.429982

60379, 27144, 171.9971, 0.429827  
60380, 26772, 171.9351, 0.429672  
60381, 26796, 171.8732, 0.429518  
60382, 27190, 171.8113, 0.429363  
60383, 27842, 171.7493, 0.429208  
60384, 28552, 171.6874, 0.429053  
60385, 29108, 171.6255, 0.428899  
60386, 29428, 171.5636, 0.428744  
60387, 29668, 171.5016, 0.428589  
60388, 30080, 171.4397, 0.428434  
60389, 30782, 171.3778, 0.428280  
60390, 31592, 171.3159, 0.428125  
60391, 32144, 171.2539, 0.427970  
60392, 32214, 171.1920, 0.427815  
60393, 31928, 171.1301, 0.427661  
60394, 31650, 171.0682, 0.427506  
60395, 31628, 171.0062, 0.427351  
60396, 31826, 170.9443, 0.427196  
60397, 32028, 170.8824, 0.427042  
60398, 32128, 170.8204, 0.426887  
60399, 32218, 170.7585, 0.426732  
60400, 32398, 170.6966, 0.426577  
60401, 32544, 170.6347, 0.426422  
60402, 32300, 170.5727, 0.426268  
60403, 31384, 170.5108, 0.426113  
60404, 29896, 170.4489, 0.425958  
60405, 28324, 170.3870, 0.425803  
60406, 27200, 170.3250, 0.425649  
60407, 26758, 170.2631, 0.425494  
60408, 26864, 170.2012, 0.425339  
60409, 27230, 170.1392, 0.425184  
60410, 27674, 170.0773, 0.425030  
60411, 28148, 170.0154, 0.424875  
60412, 28656, 169.9535, 0.424720  
60413, 29128, 169.8915, 0.424565  
60414, 29478, 169.8296, 0.424411  
60415, 29678, 169.7677, 0.424256  
60416, 29774, 169.7058, 0.424101  
60417, 29806, 169.6438, 0.423946  
60418, 29744, 169.5819, 0.423792  
60419, 29540, 169.5200, 0.423637  
60420, 29204, 169.4581, 0.423482  
60421, 28810, 169.3961, 0.423327  
60422, 28446, 169.3342, 0.423173  
60423, 28136, 169.2723, 0.423018  
60424, 27880, 169.2103, 0.422863  
60425, 27744, 169.1484, 0.422708  
60426, 27862, 169.0865, 0.422554  
60427, 28330, 169.0246, 0.422399  
60428, 29058, 168.9626, 0.422244  
60429, 29788, 168.9007, 0.422089  
60430, 30190, 168.8388, 0.421935  
60431, 30094, 168.7769, 0.421780  
60432, 29538, 168.7149, 0.421625  
60433, 28726, 168.6530, 0.421470  
60434, 27908, 168.5911, 0.421315  
60435, 27278, 168.5291, 0.421161  
60436, 26940, 168.4672, 0.421006  
60437, 26846, 168.4053, 0.420851  
60438, 26832, 168.3434, 0.420696  
60439, 26718, 168.2814, 0.420542  
60440, 26496, 168.2195, 0.420387  
60441, 26390, 168.1576, 0.420232  
60442, 26690, 168.0957, 0.420077  
60443, 27512, 168.0337, 0.419923  
60444, 28650, 167.9718, 0.419768  
60445, 29722, 167.9099, 0.419613  
60446, 30470, 167.8480, 0.419458  
60447, 30918, 167.7860, 0.419304  
60448, 31260, 167.7241, 0.419149  
60449, 31558, 167.6622, 0.418994  
60450, 31662, 167.6002, 0.418839  
60451, 31376, 167.5383, 0.418685  
60452, 30724, 167.4764, 0.418530  
60453, 30010, 167.4145, 0.418375  
60454, 29544, 167.3525, 0.418220

60455, 29392, 167.2906, 0.418066  
60456, 29354, 167.2287, 0.417911  
60457, 29226, 167.1668, 0.417756  
60458, 29026, 167.1048, 0.417601  
60459, 28916, 167.0429, 0.417447  
60460, 28976, 166.9810, 0.417292  
60461, 29044, 166.9190, 0.417137  
60462, 28876, 166.8571, 0.416982  
60463, 28416, 166.7952, 0.416828  
60464, 27908, 166.7333, 0.416673  
60465, 27696, 166.6713, 0.416518  
60466, 27940, 166.6094, 0.416363  
60467, 28508, 166.5475, 0.416208  
60468, 29148, 166.4856, 0.416054  
60469, 29734, 166.4236, 0.415899  
60470, 30310, 166.3617, 0.415744  
60471, 30906, 166.2998, 0.415589  
60472, 31406, 166.2379, 0.415435  
60473, 31556, 166.1759, 0.415280  
60474, 31174, 166.1140, 0.415125  
60475, 30308, 166.0521, 0.414970  
60476, 29174, 165.9901, 0.414816  
60477, 28020, 165.9282, 0.414661  
60478, 27008, 165.8663, 0.414506  
60479, 26232, 165.8044, 0.414351  
60480, 25758, 165.7424, 0.414197  
60481, 25656, 165.6805, 0.414042  
60482, 25946, 165.6186, 0.413887  
60483, 26578, 165.5567, 0.413732  
60484, 27432, 165.4947, 0.413578  
60485, 28388, 165.4328, 0.413423  
60486, 29258, 165.3709, 0.413268  
60487, 29848, 165.3089, 0.413113  
60488, 29968, 165.2470, 0.412959  
60489, 29574, 165.1851, 0.412804  
60490, 28812, 165.1232, 0.412649  
60491, 27964, 165.0612, 0.412494  
60492, 27294, 164.9993, 0.412340  
60493, 26950, 164.9374, 0.412185  
60494, 26982, 164.8755, 0.412030  
60495, 27394, 164.8135, 0.411875  
60496, 28170, 164.7516, 0.411721  
60497, 29200, 164.6897, 0.411566  
60498, 30244, 164.6278, 0.411411  
60499, 31042, 164.5658, 0.411256  
60500, 31460, 164.5039, 0.411101  
60501, 31520, 164.4420, 0.410947  
60502, 31290, 164.3800, 0.410792  
60503, 30744, 164.3181, 0.410637  
60504, 29818, 164.2562, 0.410482  
60505, 28610, 164.1943, 0.410328  
60506, 27486, 164.1323, 0.410173  
60507, 26872, 164.0704, 0.410018  
60508, 26928, 164.0085, 0.409863  
60509, 27358, 163.9466, 0.409709  
60510, 27654, 163.8846, 0.409554  
60511, 27492, 163.8227, 0.409399  
60512, 26998, 163.7608, 0.409244  
60513, 26530, 163.6988, 0.409090  
60514, 26332, 163.6369, 0.408935  
60515, 26352, 163.5750, 0.408780  
60516, 26426, 163.5131, 0.408625  
60517, 26552, 163.4511, 0.408471  
60518, 26912, 163.3892, 0.408316  
60519, 27606, 163.3273, 0.408161  
60520, 28450, 163.2654, 0.408006  
60521, 29080, 163.2034, 0.407852  
60522, 29360, 163.1415, 0.407697  
60523, 29526, 163.0796, 0.407542  
60524, 29962, 163.0177, 0.407387  
60525, 30764, 162.9557, 0.407233  
60526, 31542, 162.8938, 0.407078  
60527, 31734, 162.8319, 0.406923  
60528, 31160, 162.7699, 0.406768  
60529, 30224, 162.7080, 0.406614  
60530, 29630, 162.6461, 0.406459

60531, 29826, 162.5842, 0.406304  
60532, 30718, 162.5222, 0.406149  
60533, 31802, 162.4603, 0.405994  
60534, 32592, 162.3984, 0.405840  
60535, 32846, 162.3365, 0.405685  
60536, 32586, 162.2745, 0.405530  
60537, 31934, 162.2126, 0.405375  
60538, 31074, 162.1507, 0.405221  
60539, 30240, 162.0887, 0.405066  
60540, 29686, 162.0268, 0.404911  
60541, 29532, 161.9649, 0.404756  
60542, 29636, 161.9030, 0.404602  
60543, 29668, 161.8410, 0.404447  
60544, 29320, 161.7791, 0.404292  
60545, 28542, 161.7172, 0.404137  
60546, 27566, 161.6553, 0.403983  
60547, 26714, 161.5933, 0.403828  
60548, 26250, 161.5314, 0.403673  
60549, 26276, 161.4695, 0.403518  
60550, 26772, 161.4076, 0.403364  
60551, 27578, 161.3456, 0.403209  
60552, 28422, 161.2837, 0.403054  
60553, 28996, 161.2218, 0.402899  
60554, 29128, 161.1598, 0.402745  
60555, 28952, 161.0979, 0.402590  
60556, 28834, 161.0360, 0.402435  
60557, 29120, 160.9741, 0.402280  
60558, 29834, 160.9121, 0.402126  
60559, 30654, 160.8502, 0.401971  
60560, 31156, 160.7883, 0.401816  
60561, 31124, 160.7264, 0.401661  
60562, 30696, 160.6644, 0.401506  
60563, 30218, 160.6025, 0.401352  
60564, 29990, 160.5406, 0.401197  
60565, 30076, 160.4787, 0.401042  
60566, 30308, 160.4167, 0.400887  
60567, 30422, 160.3548, 0.400733  
60568, 30256, 160.2929, 0.400578  
60569, 29860, 160.2309, 0.400423  
60570, 29460, 160.1690, 0.400268  
60571, 29328, 160.1071, 0.400114  
60572, 29596, 160.0452, 0.399959  
60573, 30158, 159.9832, 0.399804  
60574, 30736, 159.9213, 0.399649  
60575, 31104, 159.8594, 0.399495  
60576, 31232, 159.7975, 0.399340  
60577, 31242, 159.7355, 0.399185  
60578, 31268, 159.6736, 0.399030  
60579, 31286, 159.6117, 0.398876  
60580, 31196, 159.5497, 0.398721  
60581, 30954, 159.4878, 0.398566  
60582, 30668, 159.4259, 0.398411  
60583, 30474, 159.3640, 0.398257  
60584, 30364, 159.3020, 0.398102  
60585, 30164, 159.2401, 0.397947  
60586, 29708, 159.1782, 0.397792  
60587, 29034, 159.1163, 0.397638  
60588, 28376, 159.0543, 0.397483  
60589, 27956, 158.9924, 0.397328  
60590, 27770, 158.9305, 0.397173  
60591, 27640, 158.8686, 0.397019  
60592, 27440, 158.8066, 0.396864  
60593, 27272, 158.7447, 0.396709  
60594, 27372, 158.6828, 0.396554  
60595, 27866, 158.6208, 0.396399  
60596, 28580, 158.5589, 0.396245  
60597, 29174, 158.4970, 0.396090  
60598, 29382, 158.4351, 0.395935  
60599, 29228, 158.3731, 0.395780  
60600, 28990, 158.3112, 0.395626  
60601, 29020, 158.2493, 0.395471  
60602, 29538, 158.1874, 0.395316  
60603, 30564, 158.1254, 0.395161  
60604, 31880, 158.0635, 0.395007  
60605, 33100, 158.0016, 0.394852  
60606, 33772, 157.9396, 0.394697

60607, 33664, 157.8777, 0.394542  
60608, 32890, 157.8158, 0.394388  
60609, 31906, 157.7539, 0.394233  
60610, 31212, 157.6919, 0.394078  
60611, 31026, 157.6300, 0.393923  
60612, 31184, 157.5681, 0.393769  
60613, 31368, 157.5062, 0.393614  
60614, 31376, 157.4442, 0.393459  
60615, 31248, 157.3823, 0.393304  
60616, 31112, 157.3204, 0.393150  
60617, 31040, 157.2585, 0.392995  
60618, 31012, 157.1965, 0.392840  
60619, 31006, 157.1346, 0.392685  
60620, 31044, 157.0727, 0.392531  
60621, 31140, 157.0107, 0.392376  
60622, 31178, 156.9488, 0.392221  
60623, 31012, 156.8869, 0.392066  
60624, 30616, 156.8250, 0.391912  
60625, 30192, 156.7630, 0.391757  
60626, 29972, 156.7011, 0.391602  
60627, 30020, 156.6392, 0.391447  
60628, 30140, 156.5773, 0.391292  
60629, 30138, 156.5153, 0.391138  
60630, 30044, 156.4534, 0.390983  
60631, 30086, 156.3915, 0.390828  
60632, 30416, 156.3295, 0.390673  
60633, 30852, 156.2676, 0.390519  
60634, 31014, 156.2057, 0.390364  
60635, 30696, 156.1438, 0.390209  
60636, 30084, 156.0818, 0.390054  
60637, 29554, 156.0199, 0.389900  
60638, 29298, 155.9580, 0.389745  
60639, 29176, 155.8961, 0.389590  
60640, 28996, 155.8341, 0.389435  
60641, 28846, 155.7722, 0.389281  
60642, 29084, 155.7103, 0.389126  
60643, 29910, 155.6484, 0.388971  
60644, 31016, 155.5864, 0.388816  
60645, 31754, 155.5245, 0.388662  
60646, 31698, 155.4626, 0.388507  
60647, 31072, 155.4006, 0.388352  
60648, 30550, 155.3387, 0.388197  
60649, 30592, 155.2768, 0.388043  
60650, 31050, 155.2149, 0.387888  
60651, 31356, 155.1529, 0.387733  
60652, 31146, 155.0910, 0.387578  
60653, 30580, 155.0291, 0.387424  
60654, 30136, 154.9672, 0.387269  
60655, 30052, 154.9052, 0.387114  
60656, 30126, 154.8433, 0.386959  
60657, 29994, 154.7814, 0.386805  
60658, 29566, 154.7194, 0.386650  
60659, 29164, 154.6575, 0.386495  
60660, 29192, 154.5956, 0.386340  
60661, 29720, 154.5337, 0.386185  
60662, 30444, 154.4717, 0.386031  
60663, 31004, 154.4098, 0.385876  
60664, 31262, 154.3479, 0.385721  
60665, 31344, 154.2860, 0.385566  
60666, 31394, 154.2240, 0.385412  
60667, 31400, 154.1621, 0.385257  
60668, 31236, 154.1002, 0.385102  
60669, 30838, 154.0383, 0.384947  
60670, 30266, 153.9763, 0.384793  
60671, 29626, 153.9144, 0.384638  
60672, 29010, 153.8525, 0.384483  
60673, 28498, 153.7905, 0.384328  
60674, 28194, 153.7286, 0.384174  
60675, 28176, 153.6667, 0.384019  
60676, 28368, 153.6048, 0.383864  
60677, 28542, 153.5428, 0.383709  
60678, 28496, 153.4809, 0.383555  
60679, 28252, 153.4190, 0.383400  
60680, 28068, 153.3571, 0.383245  
60681, 28190, 153.2951, 0.383090  
60682, 28604, 153.2332, 0.382936  
60683, 29046, 153.1713, 0.382781  
60684, 29228, 153.1093, 0.382626  
60685, 29068, 153.0474, 0.382471  
60686, 28694, 152.9855, 0.382317  
60687, 28246, 152.9236, 0.382162  
60688, 27770, 152.8616, 0.382007  
60689, 27302, 152.7997, 0.381852  
60690, 26986, 152.7378, 0.381698  
60691, 27036, 152.6759, 0.381543  
60692, 27520, 152.6139, 0.381388  
60693, 28214, 152.5520, 0.381233  
60694, 28744, 152.4901, 0.381078  
60695, 28870, 152.4282, 0.380924  
60696, 28648, 152.3662, 0.380769  
60697, 28306, 152.3043, 0.380614  
60698, 28022, 152.2424, 0.380459  
60699, 27828, 152.1804, 0.380305  
60700, 27726, 152.1185, 0.380150  
60701, 27772, 152.0566, 0.379995  
60702, 27970, 152.9947, 0.379840  
60703, 28156, 151.9327, 0.379686  
60704, 28036, 151.8708, 0.379531  
60705, 27520, 151.8089, 0.379376  
60706, 26918, 151.7470, 0.379221  
60707, 26796, 151.6850, 0.379067  
60708, 27442, 151.6231, 0.378912  
60709, 28546, 151.5612, 0.378757  
60710, 29430, 151.4992, 0.378602  
60711, 29650, 151.4373, 0.378448  
60712, 29394, 151.3754, 0.378293  
60713, 29250, 151.3135, 0.378138  
60714, 29600, 151.2515, 0.377983  
60715, 30270, 151.1896, 0.377829  
60716, 30778, 151.1277, 0.377674  
60717, 30862, 151.0658, 0.377519  
60718, 30704, 151.0038, 0.377364  
60719, 30638, 150.9419, 0.377210  
60720, 30718, 150.8800, 0.377055  
60721, 30676, 150.8181, 0.376900  
60722, 30304, 150.7561, 0.376745  
60723, 29826, 150.6942, 0.376591  
60724, 29734, 150.6323, 0.376436  
60725, 30278, 150.5703, 0.376281  
60726, 31172, 150.5084, 0.376126  
60727, 31782, 150.4465, 0.375971  
60728, 31730, 150.3846, 0.375817  
60729, 31160, 150.3226, 0.375662  
60730, 30552, 150.2607, 0.375507  
60731, 30254, 150.1988, 0.375352  
60732, 30264, 150.1369, 0.375198  
60733, 30398, 150.0749, 0.375043  
60734, 30554, 150.0130, 0.374888  
60735, 30746, 149.9511, 0.374733  
60736, 30934, 149.8891, 0.374579  
60737, 30960, 149.8272, 0.374424  
60738, 30710, 149.7653, 0.374269  
60739, 30334, 149.7034, 0.374114  
60740, 30178, 149.6414, 0.373960  
60741, 30448, 149.5795, 0.373805  
60742, 30960, 149.5176, 0.373650  
60743, 31310, 149.4557, 0.373495  
60744, 31256, 149.3937, 0.373341  
60745, 30940, 149.3318, 0.373186  
60746, 30700, 149.2699, 0.373031  
60747, 30676, 149.2080, 0.372876  
60748, 30712, 149.1460, 0.372722  
60749, 30602, 149.0841, 0.372567  
60750, 30382, 149.0222, 0.372412  
60751, 30344, 148.9602, 0.372257  
60752, 30652, 148.8983, 0.372103  
60753, 31146, 148.8364, 0.371948  
60754, 31474, 148.7745, 0.371793  
60755, 31452, 148.7125, 0.371638  
60756, 31228, 148.6506, 0.371484  
60757, 31044, 148.5887, 0.371329  
60758, 30922, 148.5268, 0.371174  
60759, 30658, 148.4648, 0.371019  
60760, 30154, 148.4029, 0.370864  
60761, 29686, 148.3410, 0.370710  
60762, 29704, 148.2790, 0.370555  
60763, 30360, 148.2171, 0.370400  
60764, 31288, 148.1552, 0.370245  
60765, 31892, 148.0933, 0.370091  
60766, 31882, 148.0313, 0.369936  
60767, 31538, 147.9694, 0.369781  
60768, 31336, 147.9075, 0.369626  
60769, 31448, 147.8456, 0.369472  
60770, 31592, 147.7836, 0.369317  
60771, 31412, 147.7217, 0.369162  
60772, 30918, 147.6598, 0.369007  
60773, 30544, 147.5979, 0.368853  
60774, 30742, 147.5359, 0.368698  
60775, 31546, 147.4740, 0.368543  
60776, 32562, 147.4121, 0.368388  
60777, 33324, 147.3501, 0.368234  
60778, 33608, 147.2882, 0.368079  
60779, 33470, 147.2263, 0.367924  
60780, 33038, 147.1644, 0.367769  
60781, 32426, 147.1024, 0.367615  
60782, 31752, 147.0405, 0.367460  
60783, 31228, 146.9786, 0.367305  
60784, 31020, 146.9167, 0.367150  
60785, 31072, 146.8547, 0.366996  
60786, 31100, 146.7928, 0.366841  
60787, 30810, 146.7309, 0.366686  
60788, 30200, 146.6690, 0.366531  
60789, 29554, 146.6070, 0.366377  
60790, 29200, 146.5451, 0.366222  
60791, 29254, 146.4832, 0.366067  
60792, 29586, 146.4212, 0.365912  
60793, 30030, 146.3593, 0.365757  
60794, 30480, 146.2974, 0.365603  
60795, 30916, 146.2355, 0.365448  
60796, 31264, 146.1735, 0.365293  
60797, 31426, 146.1116, 0.365138  
60798, 31390, 146.0497, 0.364984  
60799, 31254, 145.9878, 0.364829  
60800, 31092, 145.9258, 0.364674  
60801, 30802, 145.8639, 0.364519  
60802, 30186, 145.8020, 0.364365  
60803, 29230, 145.7400, 0.364210  
60804, 28282, 145.6781, 0.364055  
60805, 27838, 145.6162, 0.363900  
60806, 28108, 145.5543, 0.363746  
60807, 28828, 145.4923, 0.363591  
60808, 29512, 145.4304, 0.363436  
60809, 29918, 145.3685, 0.363281  
60810, 30240, 145.3066, 0.363127  
60811, 30810, 145.2446, 0.362972  
60812, 31618, 145.1827, 0.362817  
60813, 32260, 145.1208, 0.362662  
60814, 32346, 145.0589, 0.362508  
60815, 31930, 144.9969, 0.362353  
60816, 31478, 144.9350, 0.362198  
60817, 31360, 144.8731, 0.362043  
60818, 31456, 144.8111, 0.361889  
60819, 31302, 144.7492, 0.361734  
60820, 30682, 144.6873, 0.361579  
60821, 29902, 144.6254, 0.361424  
60822, 29550, 144.5634, 0.361270  
60823, 29866, 144.5015, 0.361115  
60824, 30484, 144.4396, 0.360960  
60825, 30762, 144.3777, 0.360805  
60826, 30352, 144.3157, 0.360650  
60827, 29486, 144.2538, 0.360496  
60828, 28630, 144.1919, 0.360341  
60829, 28066, 144.1299, 0.360186  
60830, 27712, 144.0680, 0.360031  
60831, 27438, 144.0061, 0.359877  
60832, 27320, 143.9442, 0.359722  
60833, 27596, 143.8822, 0.359567  
60834, 28364, 143.8203, 0.359412



60835, 29430, 143.7584, 0.359258  
60836, 30434, 143.6965, 0.359103  
60837, 31208, 143.6345, 0.358948  
60838, 31822, 143.5726, 0.358793  
60839, 32390, 143.5107, 0.358639  
60840, 32848, 143.4488, 0.358484  
60841, 32996, 143.3868, 0.358329  
60842, 32752, 143.3249, 0.358174  
60843, 32300, 143.2630, 0.358020  
60844, 31940, 143.2010, 0.357865  
60845, 31774, 143.1391, 0.357710  
60846, 31618, 143.0772, 0.357555  
60847, 31202, 143.0153, 0.357401  
60848, 30470, 142.9533, 0.357246  
60849, 29640, 142.8914, 0.357091  
60850, 28984, 142.8295, 0.356936  
60851, 28624, 142.7676, 0.356782  
60852, 28488, 142.7056, 0.356627  
60853, 28488, 142.6437, 0.356472  
60854, 28596, 142.5818, 0.356317  
60855, 28844, 142.5198, 0.356162  
60856, 29188, 142.4579, 0.356008  
60857, 29540, 142.3960, 0.355853  
60858, 29878, 142.3341, 0.355698  
60859, 30290, 142.2721, 0.355543  
60860, 30840, 142.2102, 0.355389  
60861, 31408, 142.1483, 0.355234  
60862, 31712, 142.0864, 0.355079  
60863, 31542, 142.0244, 0.354924  
60864, 30978, 141.9625, 0.354770  
60865, 30330, 141.9006, 0.354615  
60866, 29886, 141.8387, 0.354460  
60867, 29686, 141.7767, 0.354305  
60868, 29562, 141.7148, 0.354151  
60869, 29390, 141.6529, 0.353996  
60870, 29190, 141.5909, 0.353841  
60871, 29040, 141.5290, 0.353686  
60872, 28920, 141.4671, 0.353532  
60873, 28718, 141.4052, 0.353377  
60874, 28398, 141.3432, 0.353222  
60875, 28124, 141.2813, 0.353067  
60876, 28126, 141.2194, 0.352913  
60877, 28452, 141.1575, 0.352758  
60878, 28880, 141.0955, 0.352603  
60879, 29122, 141.0336, 0.352448  
60880, 29114, 140.9717, 0.352294  
60881, 29106, 140.9097, 0.352139  
60882, 29362, 140.8478, 0.351984  
60883, 29904, 140.7859, 0.351829  
60884, 30500, 140.7240, 0.351675  
60885, 30952, 140.6620, 0.351520  
60886, 31336, 140.6001, 0.351365  
60887, 31944, 140.5382, 0.351210  
60888, 32910, 140.4763, 0.351055  
60889, 34010, 140.4143, 0.350901  
60890, 34782, 140.3524, 0.350746  
60891, 34908, 140.2905, 0.350591  
60892, 34478, 140.2286, 0.350436  
60893, 33896, 140.1666, 0.350282  
60894, 33564, 140.1047, 0.350127  
60895, 33598, 140.0428, 0.349972  
60896, 33814, 139.9808, 0.349817  
60897, 33920, 139.9189, 0.349663  
60898, 33722, 139.8570, 0.349508  
60899, 33206, 139.7951, 0.349353  
60900, 32550, 139.7331, 0.349198  
60901, 32024, 139.6712, 0.349044  
60902, 31836, 139.6093, 0.348889  
60903, 31984, 139.5474, 0.348734  
60904, 32238, 139.4854, 0.348579  
60905, 32254, 139.4235, 0.348425  
60906, 31884, 139.3616, 0.348270  
60907, 31280, 139.2996, 0.348115  
60908, 30778, 139.2377, 0.347960  
60909, 30588, 139.1758, 0.347806  
60910, 30616, 139.1139, 0.347651  
60911, 30582, 139.0519, 0.347496  
60912, 30326, 138.9900, 0.347341  
60913, 29986, 138.9281, 0.347187  
60914, 29848, 138.8662, 0.347032  
60915, 30058, 138.8042, 0.346877  
60916, 30464, 138.7423, 0.346722  
60917, 30762, 138.6804, 0.346568  
60918, 30798, 138.6185, 0.346413  
60919, 30648, 138.5565, 0.346258  
60920, 30564, 138.4946, 0.346103  
60921, 30692, 138.4327, 0.345948  
60922, 31030, 138.3707, 0.345794  
60923, 31436, 138.3088, 0.345639  
60924, 31758, 138.2469, 0.345484  
60925, 31870, 138.1850, 0.345329  
60926, 31686, 138.1230, 0.345175  
60927, 31226, 138.0611, 0.345020  
60928, 30690, 137.9992, 0.344865  
60929, 30394, 137.9373, 0.344710  
60930, 30588, 137.8753, 0.344556  
60931, 31236, 137.8134, 0.344401  
60932, 32024, 137.7515, 0.344246  
60933, 32564, 137.6895, 0.344091  
60934, 32668, 137.6276, 0.343937  
60935, 32420, 137.5657, 0.343782  
60936, 32002, 137.5038, 0.343627  
60937, 31538, 137.4418, 0.343472  
60938, 31046, 137.3799, 0.343318  
60939, 30566, 137.3180, 0.343163  
60940, 30216, 137.2561, 0.343008  
60941, 30124, 137.1941, 0.342853  
60942, 30256, 137.1322, 0.342699  
60943, 30454, 137.0703, 0.342544  
60944, 30580, 137.0084, 0.342389  
60945, 30660, 136.9464, 0.342234  
60946, 30816, 136.8845, 0.342080  
60947, 31078, 136.8226, 0.341925  
60948, 31238, 136.7606, 0.341770  
60949, 31018, 136.6987, 0.341615  
60950, 30340, 136.6368, 0.341461  
60951, 29430, 136.5749, 0.341306  
60952, 28724, 136.5129, 0.341151  
60953, 28540, 136.4510, 0.340996  
60954, 28930, 136.3891, 0.340841  
60955, 29740, 136.3272, 0.340687  
60956, 30734, 136.2652, 0.340532  
60957, 31650, 136.2033, 0.340377  
60958, 32186, 136.1414, 0.340222  
60959, 32082, 136.0794, 0.340068  
60960, 31286, 136.0175, 0.339913  
60961, 30098, 135.9556, 0.339758  
60962, 29088, 135.8937, 0.339603  
60963, 28740, 135.8317, 0.339449  
60964, 29126, 135.7698, 0.339294  
60965, 29872, 135.7079, 0.339139  
60966, 30416, 135.6460, 0.338984  
60967, 30414, 135.5840, 0.338830  
60968, 29908, 135.5221, 0.338675  
60969, 29228, 135.4602, 0.338520  
60970, 28768, 135.3983, 0.338365  
60971, 28764, 135.3363, 0.338211  
60972, 29226, 135.2744, 0.338056  
60973, 29978, 135.2125, 0.337901  
60974, 30744, 135.1505, 0.337746  
60975, 31302, 135.0886, 0.337592  
60976, 31596, 135.0267, 0.337437  
60977, 31744, 134.9648, 0.337282  
60978, 31896, 134.9028, 0.337127  
60979, 32048, 134.8409, 0.336973  
60980, 32012, 134.7790, 0.336818  
60981, 31584, 134.7171, 0.336663  
60982, 30756, 134.6551, 0.336508  
60983, 29788, 134.5932, 0.336354  
60984, 28980, 134.5313, 0.336199  
60985, 28472, 134.4694, 0.336044  
60986, 28198, 134.4074, 0.335889  
60987, 28056, 134.3455, 0.335734  
60988, 28042, 134.2836, 0.335580  
60989, 28226, 134.2216, 0.335425  
60990, 28562, 134.1597, 0.335270  
60991, 28848, 134.0978, 0.335115  
60992, 28900, 134.0359, 0.334961  
60993, 28774, 133.9739, 0.334806  
60994, 28766, 133.9120, 0.334651  
60995, 29132, 133.8501, 0.334496  
60996, 29836, 133.7882, 0.334342  
60997, 30576, 133.7262, 0.334187  
60998, 31080, 133.6643, 0.334032  
60999, 31392, 133.6024, 0.333877  
61000, 31772, 133.5404, 0.333723  
61001, 32406, 133.4785, 0.333568  
61002, 33178, 133.4166, 0.333413  
61003, 33780, 133.3547, 0.333258  
61004, 34006, 133.2927, 0.333104  
61005, 33908, 133.2308, 0.332949  
61006, 33656, 133.1689, 0.332794  
61007, 33320, 133.1070, 0.332639  
61008, 32824, 133.0450, 0.332485  
61009, 32136, 132.9831, 0.332330  
61010, 31406, 132.9212, 0.332175  
61011, 30890, 132.8593, 0.332020  
61012, 30666, 132.7973, 0.331866  
61013, 30546, 132.7354, 0.331711  
61014, 30282, 132.6735, 0.331556  
61015, 29860, 132.6115, 0.331401  
61016, 29582, 132.5496, 0.331247  
61017, 29772, 132.4877, 0.331092  
61018, 30408, 132.4258, 0.330937  
61019, 31056, 132.3638, 0.330782  
61020, 31204, 132.3019, 0.330627  
61021, 30684, 132.2400, 0.330473  
61022, 29790, 132.1781, 0.330318  
61023, 29014, 132.1161, 0.330163  
61024, 28678, 132.0542, 0.330008  
61025, 28716, 131.9923, 0.329854  
61026, 28824, 131.9303, 0.329699  
61027, 28720, 131.8684, 0.329544  
61028, 28300, 131.8065, 0.329389  
61029, 27692, 131.7446, 0.329235  
61030, 27130, 131.6826, 0.329080  
61031, 26854, 131.6207, 0.328925  
61032, 26990, 131.5588, 0.328770  
61033, 27470, 131.4969, 0.328616  
61034, 28088, 131.4349, 0.328461  
61035, 28604, 131.3730, 0.328306  
61036, 28904, 131.3111, 0.328151  
61037, 29030, 131.2492, 0.327997  
61038, 29104, 131.1872, 0.327842  
61039, 29190, 131.1253, 0.327687  
61040, 29278, 131.0634, 0.327532  
61041, 29366, 131.0014, 0.327378  
61042, 29484, 130.9395, 0.327223  
61043, 29652, 130.8776, 0.327068  
61044, 29802, 130.8157, 0.326913  
61045, 29836, 130.7537, 0.326759  
61046, 29728, 130.6918, 0.326604  
61047, 29662, 130.6299, 0.326449  
61048, 29864, 130.5680, 0.326294  
61049, 30364, 130.5060, 0.326140  
61050, 30892, 130.4441, 0.325985  
61051, 31058, 130.3822, 0.325830  
61052, 30730, 130.3202, 0.325675  
61053, 30132, 130.2583, 0.325520  
61054, 29632, 130.1964, 0.325366  
61055, 29380, 130.1345, 0.325211  
61056, 29190, 130.0725, 0.325056  
61057, 28798, 130.0106, 0.324901  
61058, 28210, 129.9487, 0.324747  
61059, 27742, 129.8868, 0.324592  
61060, 27726, 129.8248, 0.324437  
61061, 28172, 129.7629, 0.324282  
61062, 28802, 129.7010, 0.324128

61063, 29322, 129.6391, 0.323973  
61064, 29698, 129.5771, 0.323818  
61065, 30078, 129.5152, 0.323663  
61066, 30530, 129.4533, 0.323509  
61067, 30878, 129.3913, 0.323354  
61068, 30886, 129.3294, 0.323199  
61069, 30496, 129.2675, 0.323044  
61070, 29932, 129.2056, 0.322890  
61071, 29504, 129.1436, 0.322735  
61072, 29368, 129.0817, 0.322580  
61073, 29492, 129.0198, 0.322425  
61074, 29810, 128.9579, 0.322271  
61075, 30318, 128.8959, 0.322116  
61076, 30978, 128.8340, 0.321961  
61077, 31598, 128.7721, 0.321806  
61078, 31920, 128.7101, 0.321652  
61079, 31836, 128.6482, 0.321497  
61080, 31588, 128.5863, 0.321342  
61081, 31558, 128.5244, 0.321187  
61082, 31912, 128.4624, 0.321033  
61083, 32398, 128.4005, 0.320878  
61084, 32578, 128.3386, 0.320723  
61085, 32240, 128.2767, 0.320568  
61086, 31572, 128.2147, 0.320413  
61087, 30950, 128.1528, 0.320259  
61088, 30552, 128.0909, 0.320104  
61089, 30220, 128.0290, 0.319949  
61090, 29684, 127.9670, 0.319794  
61091, 28872, 127.9051, 0.319640  
61092, 27970, 127.8432, 0.319485  
61093, 27208, 127.7812, 0.319330  
61094, 26698, 127.7193, 0.319175  
61095, 26426, 127.6574, 0.319021  
61096, 26438, 127.5955, 0.318866  
61097, 26800, 127.5335, 0.318711  
61098, 27476, 127.4716, 0.318556  
61099, 28174, 127.4097, 0.318402  
61100, 28518, 127.3478, 0.318247  
61101, 28370, 127.2858, 0.318092  
61102, 27990, 127.2239, 0.317937  
61103, 27830, 127.1620, 0.317783  
61104, 28140, 127.1000, 0.317628  
61105, 28810, 127.0381, 0.317473  
61106, 29510, 126.9762, 0.317318  
61107, 30044, 126.9143, 0.317164  
61108, 30440, 126.8523, 0.317009  
61109, 30750, 126.7904, 0.316854  
61110, 30894, 126.7285, 0.316699  
61111, 30690, 126.6666, 0.316545  
61112, 30142, 126.6046, 0.316390  
61113, 29548, 126.5427, 0.316235  
61114, 29292, 126.4808, 0.316080  
61115, 29508, 126.4189, 0.315925  
61116, 29954, 126.3569, 0.315771  
61117, 30282, 126.2950, 0.315616  
61118, 30364, 126.2331, 0.315461  
61119, 30388, 126.1711, 0.315306  
61120, 30596, 126.1092, 0.315152  
61121, 31000, 126.0473, 0.314997  
61122, 31370, 125.9854, 0.314842  
61123, 31448, 125.9234, 0.314687  
61124, 31172, 125.8615, 0.314533  
61125, 30660, 125.7996, 0.314378  
61126, 30080, 125.7377, 0.314223  
61127, 29546, 125.6757, 0.314068  
61128, 29164, 125.6138, 0.313914  
61129, 29052, 125.5519, 0.313759  
61130, 29234, 125.4899, 0.313604  
61131, 29568, 125.4280, 0.313449  
61132, 29824, 125.3661, 0.313295  
61133, 29872, 125.3042, 0.313140  
61134, 29864, 125.2422, 0.312985  
61135, 30060, 125.1803, 0.312830  
61136, 30538, 125.1184, 0.312676  
61137, 31036, 125.0565, 0.312521  
61138, 31208, 124.9945, 0.312366

61139, 30960, 124.9326, 0.312211  
61140, 30582, 124.8707, 0.312057  
61141, 30454, 124.8088, 0.311902  
61142, 30676, 124.7468, 0.311747  
61143, 31006, 124.6849, 0.311592  
61144, 31166, 124.6230, 0.311438  
61145, 31190, 124.5610, 0.311283  
61146, 31362, 124.4991, 0.311128  
61147, 31852, 124.4372, 0.310973  
61148, 32468, 124.3753, 0.310818  
61149, 32780, 124.3133, 0.310664  
61150, 32572, 124.2514, 0.310509  
61151, 32042, 124.1895, 0.310354  
61152, 31640, 124.1276, 0.310199  
61153, 31624, 124.0656, 0.310045  
61154, 31916, 124.0037, 0.309890  
61155, 32282, 123.9418, 0.309735  
61156, 32606, 123.8798, 0.309580  
61157, 32956, 123.8179, 0.309426  
61158, 33358, 123.7560, 0.309271  
61159, 33664, 123.6941, 0.309116  
61160, 33630, 123.6321, 0.308961  
61161, 33210, 123.5702, 0.308807  
61162, 32634, 123.5083, 0.308652  
61163, 32218, 123.4464, 0.308497  
61164, 32108, 123.3844, 0.308342  
61165, 32216, 123.3225, 0.308188  
61166, 32404, 123.2606, 0.308033  
61167, 32638, 123.1987, 0.307878  
61168, 32924, 123.1367, 0.307723  
61169, 33190, 123.0748, 0.307569  
61170, 33278, 123.0129, 0.307414  
61171, 33180, 122.9509, 0.307259  
61172, 33162, 122.8890, 0.307104  
61173, 33544, 122.8271, 0.306950  
61174, 34340, 122.7652, 0.306795  
61175, 35120, 122.7032, 0.306640  
61176, 35328, 122.6413, 0.306485  
61177, 34830, 122.5794, 0.306331  
61178, 34064, 122.5175, 0.306176  
61179, 33648, 122.4555, 0.306021  
61180, 33784, 122.3936, 0.305866  
61181, 34090, 122.3317, 0.305711  
61182, 34006, 122.2697, 0.305557  
61183, 33368, 122.2078, 0.305402  
61184, 32532, 122.1459, 0.305247  
61185, 31986, 122.0840, 0.305092  
61186, 31866, 122.0220, 0.304938  
61187, 31910, 121.9601, 0.304783  
61188, 31756, 121.8982, 0.304628  
61189, 31352, 121.8363, 0.304473  
61190, 30912, 121.7743, 0.304319  
61191, 30684, 121.7124, 0.304164  
61192, 30712, 121.6505, 0.304009  
61193, 30890, 121.5886, 0.303854  
61194, 31136, 121.5266, 0.303700  
61195, 31392, 121.4647, 0.303545  
61196, 31548, 121.4028, 0.303390  
61197, 31402, 121.3408, 0.303235  
61198, 30866, 121.2789, 0.303081  
61199, 30172, 121.2170, 0.302926  
61200, 29802, 121.1551, 0.302771  
61201, 30064, 121.0931, 0.302616  
61202, 30792, 121.0312, 0.302462  
61203, 31418, 120.9693, 0.302307  
61204, 31432, 120.9074, 0.302152  
61205, 30792, 120.8454, 0.301997  
61206, 29884, 120.7835, 0.301843  
61207, 29158, 120.7216, 0.301688  
61208, 28806, 120.6597, 0.301533  
61209, 28810, 120.5977, 0.301378  
61210, 29136, 120.5358, 0.301224  
61211, 29814, 120.4739, 0.301069  
61212, 30768, 120.4119, 0.300914  
61213, 31660, 120.3500, 0.300759  
61214, 32024, 120.2881, 0.300604

61215, 31662, 120.2262, 0.300450  
61216, 30824, 120.1642, 0.300295  
61217, 30042, 120.1023, 0.300140  
61218, 29714, 120.0404, 0.299985  
61219, 29826, 119.9785, 0.299831  
61220, 30136, 119.9165, 0.299676  
61221, 30470, 119.8546, 0.299521  
61222, 30876, 119.7927, 0.299366  
61223, 31466, 119.7307, 0.299212  
61224, 32202, 119.6688, 0.299057  
61225, 32866, 119.6069, 0.298902  
61226, 33274, 119.5450, 0.298747  
61227, 33390, 119.4830, 0.298593  
61228, 33328, 119.4211, 0.298438  
61229, 33170, 119.3592, 0.298283  
61230, 32966, 119.2973, 0.298128  
61231, 32790, 119.2353, 0.297974  
61232, 32824, 119.1734, 0.297819  
61233, 33176, 119.1115, 0.297664  
61234, 33274, 119.0496, 0.297509  
61235, 34088, 118.9876, 0.297355  
61236, 33912, 118.9257, 0.297200  
61237, 33188, 118.8638, 0.297045  
61238, 32246, 118.8018, 0.296890  
61239, 31484, 118.7399, 0.296736  
61240, 31046, 118.6780, 0.296581  
61241, 30792, 118.6161, 0.296426  
61242, 30520, 118.5541, 0.296271  
61243, 30168, 118.4922, 0.296117  
61244, 29802, 118.4303, 0.295962  
61245, 29470, 118.3684, 0.295807  
61246, 29172, 118.3064, 0.295652  
61247, 28976, 118.2445, 0.295497  
61248, 29054, 118.1826, 0.295343  
61249, 29522, 118.1206, 0.295188  
61250, 30222, 118.0587, 0.295033  
61251, 30692, 117.9968, 0.294878  
61252, 30550, 117.9349, 0.294724  
61253, 29836, 117.8729, 0.294569  
61254, 29016, 117.8110, 0.294414  
61255, 28570, 117.7491, 0.294259  
61256, 28574, 117.6872, 0.294105  
61257, 28706, 117.6252, 0.293950  
61258, 28652, 117.5633, 0.293795  
61259, 28440, 117.5014, 0.293640  
61260, 28362, 117.4395, 0.293486  
61261, 28574, 117.3775, 0.293331  
61262, 28876, 117.3156, 0.293176  
61263, 28928, 117.2537, 0.293021  
61264, 28672, 117.1917, 0.292867  
61265, 28444, 117.1298, 0.292712  
61266, 28654, 117.0679, 0.292557  
61267, 29366, 117.0060, 0.292402  
61268, 30228, 116.9440, 0.292248  
61269, 30826, 116.8821, 0.292093  
61270, 31060, 116.8202, 0.291938  
61271, 31154, 116.7583, 0.291783  
61272, 31336, 116.6963, 0.291629  
61273, 31616, 116.6344, 0.291474  
61274, 31868, 116.5725, 0.291319  
61275, 32082, 116.5105, 0.291164  
61276, 32412, 116.4486, 0.291010  
61277, 32952, 116.3867, 0.290855  
61278, 33510, 116.3248, 0.290700  
61279, 33728, 116.2628, 0.290545  
61280, 33438, 116.2009, 0.290390  
61281, 32866, 116.1390, 0.290236  
61282, 32448, 116.0771, 0.290081  
61283, 32396, 116.0151, 0.289926  
61284, 32516, 115.9532, 0.289771  
61285, 32412, 115.8913, 0.289617  
61286, 31914, 115.8294, 0.289462  
61287, 31170, 115.7674, 0.289307  
61288, 30470, 115.7055, 0.289152  
61289, 29980, 115.6436, 0.288998  
61290, 29668, 115.5816, 0.288843

61291, 29538, 115.5197, 0.288688  
61292, 29712, 115.4578, 0.288533  
61293, 30240, 115.3959, 0.288379  
61294, 30924, 115.3339, 0.288224  
61295, 31330, 115.2720, 0.288069  
61296, 31152, 115.2101, 0.287914  
61297, 30534, 115.1482, 0.287760  
61298, 29932, 115.0862, 0.287605  
61299, 29712, 115.0243, 0.287450  
61300, 29812, 114.9624, 0.287295  
61301, 29862, 114.9004, 0.287141  
61302, 29602, 114.8385, 0.286986  
61303, 29202, 114.7766, 0.286831  
61304, 29090, 114.7147, 0.286676  
61305, 29526, 114.6527, 0.286522  
61306, 30376, 114.5908, 0.286367  
61307, 31216, 114.5289, 0.286212  
61308, 31704, 114.4670, 0.286057  
61309, 31748, 114.4050, 0.285903  
61310, 31436, 114.3431, 0.285748  
61311, 30844, 114.2812, 0.285593  
61312, 30018, 114.2193, 0.285438  
61313, 29056, 114.1573, 0.285283  
61314, 28184, 114.0954, 0.285129  
61315, 27644, 114.0335, 0.284974  
61316, 27550, 113.9715, 0.284819  
61317, 27818, 113.9096, 0.284664  
61318, 28298, 113.8477, 0.284510  
61319, 28858, 113.7858, 0.284355  
61320, 29408, 113.7238, 0.284200  
61321, 29882, 113.6619, 0.284045  
61322, 30238, 113.6000, 0.283891  
61323, 30500, 113.5381, 0.283736  
61324, 30806, 113.4761, 0.283581  
61325, 31232, 113.4142, 0.283426  
61326, 31694, 113.3523, 0.283272  
61327, 31946, 113.2903, 0.283117  
61328, 31808, 113.2284, 0.282962  
61329, 31380, 113.1665, 0.282807  
61330, 30964, 113.1046, 0.282653  
61331, 30794, 113.0426, 0.282498  
61332, 30828, 112.9807, 0.282343  
61333, 30792, 112.9188, 0.282188  
61334, 30478, 112.8569, 0.282034  
61335, 29940, 112.7949, 0.281879  
61336, 29400, 112.7330, 0.281724  
61337, 29014, 112.6711, 0.281569  
61338, 28746, 112.6092, 0.281415  
61339, 28490, 112.5472, 0.281260  
61340, 28266, 112.4853, 0.281105  
61341, 28198, 112.4234, 0.280950  
61342, 28364, 112.3614, 0.280796  
61343, 28636, 112.2995, 0.280641  
61344, 28798, 112.2376, 0.280486  
61345, 28752, 112.1757, 0.280331  
61346, 28602, 112.1137, 0.280176  
61347, 28464, 112.0518, 0.280022  
61348, 28314, 111.9899, 0.279867  
61349, 28028, 111.9280, 0.279712  
61350, 27620, 111.8660, 0.279557  
61351, 27358, 111.8041, 0.279403  
61352, 27586, 111.7422, 0.279248  
61353, 28384, 111.6802, 0.279093  
61354, 29416, 111.6183, 0.278938  
61355, 30188, 111.5564, 0.278784  
61356, 30462, 111.4945, 0.278629  
61357, 30386, 111.4325, 0.278474  
61358, 30262, 111.3706, 0.278319  
61359, 30222, 111.3087, 0.278165  
61360, 30148, 111.2468, 0.278010  
61361, 29904, 111.1848, 0.277855  
61362, 29558, 111.1229, 0.277700  
61363, 29314, 111.0610, 0.277546  
61364, 29278, 110.9991, 0.277391  
61365, 29328, 110.9371, 0.277236  
61366, 29266, 110.8752, 0.277081  
61367, 29074, 110.8133, 0.276927  
61368, 28936, 110.7513, 0.276772  
61369, 29034, 110.6894, 0.276617  
61370, 29300, 110.6275, 0.276462  
61371, 29492, 110.5656, 0.276308  
61372, 29472, 110.5036, 0.276153  
61373, 29366, 110.4417, 0.275998  
61374, 29454, 110.3798, 0.275843  
61375, 29854, 110.3179, 0.275689  
61376, 30396, 110.2559, 0.275534  
61377, 30778, 110.1940, 0.275379  
61378, 30820, 110.1321, 0.275224  
61379, 30556, 110.0701, 0.275069  
61380, 30090, 110.0082, 0.274915  
61381, 29486, 109.9463, 0.274760  
61382, 28806, 109.8844, 0.274605  
61383, 28246, 109.8224, 0.274450  
61384, 28090, 109.7605, 0.274296  
61385, 28516, 109.6986, 0.274141  
61386, 29388, 109.6367, 0.273986  
61387, 30340, 109.5747, 0.273831  
61388, 31046, 109.5128, 0.273677  
61389, 31424, 109.4509, 0.273522  
61390, 31562, 109.3890, 0.273367  
61391, 31478, 109.3270, 0.273212  
61392, 31092, 109.2651, 0.273058  
61393, 30378, 109.2032, 0.272903  
61394, 29576, 109.1412, 0.272748  
61395, 29080, 109.0793, 0.272593  
61396, 29104, 109.0174, 0.272439  
61397, 29482, 108.9555, 0.272284  
61398, 29860, 108.8935, 0.272129  
61399, 30074, 108.8316, 0.271974  
61400, 30316, 108.7697, 0.271820  
61401, 30842, 108.7078, 0.271665  
61402, 31564, 108.6458, 0.271510  
61403, 32010, 108.5839, 0.271355  
61404, 31736, 108.5220, 0.271201  
61405, 30792, 108.4600, 0.271046  
61406, 29734, 108.3981, 0.270891  
61407, 29160, 108.3362, 0.270736  
61408, 29176, 108.2743, 0.270581  
61409, 29450, 108.2123, 0.270427  
61410, 29596, 108.1504, 0.270272  
61411, 29606, 108.0885, 0.270117  
61412, 29790, 108.0266, 0.269962  
61413, 30348, 107.9646, 0.269808  
61414, 31086, 107.9027, 0.269653  
61415, 31594, 107.8408, 0.269498  
61416, 31602, 107.7789, 0.269343  
61417, 31242, 107.7169, 0.269189  
61418, 30864, 107.6550, 0.269034  
61419, 30732, 107.5931, 0.268879  
61420, 30838, 107.5311, 0.268724  
61421, 31016, 107.4692, 0.268570  
61422, 31112, 107.4073, 0.268415  
61423, 31068, 107.3454, 0.268260  
61424, 30874, 107.2834, 0.268105  
61425, 30556, 107.2215, 0.267951  
61426, 30198, 107.1596, 0.267796  
61427, 29956, 107.0977, 0.267641  
61428, 29936, 107.0357, 0.267486  
61429, 30072, 106.9738, 0.267332  
61430, 30164, 106.9119, 0.267177  
61431, 30098, 106.8500, 0.267022  
61432, 29998, 106.7880, 0.266867  
61433, 30122, 106.7261, 0.266713  
61434, 30582, 106.6642, 0.266558  
61435, 31178, 106.6022, 0.266403  
61436, 31570, 106.5403, 0.266248  
61437, 31600, 106.4784, 0.266094  
61438, 31448, 106.4165, 0.265939  
61439, 31392, 106.3545, 0.265784  
61440, 31500, 106.2926, 0.265629  
61441, 31546, 106.2307, 0.265474  
61442, 31276, 106.1688, 0.265320  
61443, 30720, 106.1068, 0.265165  
61444, 30188, 106.0449, 0.265010  
61445, 29974, 105.9830, 0.264855  
61446, 30100, 105.9210, 0.264701  
61447, 30382, 105.8591, 0.264546  
61448, 30694, 105.7972, 0.264391  
61449, 31108, 105.7353, 0.264236  
61450, 31772, 105.6733, 0.264082  
61451, 32618, 105.6114, 0.263927  
61452, 33384, 105.5495, 0.263772  
61453, 33832, 105.4876, 0.263617  
61454, 33966, 105.4256, 0.263463  
61455, 34006, 105.3637, 0.263308  
61456, 34106, 105.3018, 0.263153  
61457, 34200, 105.2399, 0.262998  
61458, 34112, 105.1779, 0.262844  
61459, 33828, 105.1160, 0.262689  
61460, 33532, 105.0541, 0.262534  
61461, 33424, 104.9921, 0.262379  
61462, 33472, 104.9302, 0.262225  
61463, 33432, 104.8683, 0.262070  
61464, 33138, 104.8064, 0.261915  
61465, 32698, 104.7444, 0.261760  
61466, 32362, 104.6825, 0.261606  
61467, 32246, 104.6206, 0.261451  
61468, 32202, 104.5587, 0.261296  
61469, 31976, 104.4967, 0.261141  
61470, 31518, 104.4348, 0.260987  
61471, 31038, 104.3729, 0.260832  
61472, 30804, 104.3109, 0.260677  
61473, 30898, 104.2490, 0.260522  
61474, 31200, 104.1871, 0.260367  
61475, 31590, 104.1252, 0.260213  
61476, 32056, 104.0632, 0.260058  
61477, 32626, 104.0013, 0.259903  
61478, 33162, 103.9394, 0.259748  
61479, 33404, 103.8775, 0.259594  
61480, 33208, 103.8155, 0.259439  
61481, 32746, 103.7536, 0.259284  
61482, 32390, 103.6917, 0.259129  
61483, 32392, 103.6298, 0.258975  
61484, 32652, 103.5678, 0.258820  
61485, 32850, 103.5059, 0.258665  
61486, 32768, 103.4440, 0.258510  
61487, 32496, 103.3820, 0.258356  
61488, 32260, 103.3201, 0.258201  
61489, 32160, 103.2582, 0.258046  
61490, 32084, 103.1963, 0.257891  
61491, 31862, 103.1343, 0.257737  
61492, 31468, 103.0724, 0.257582  
61493, 31004, 103.0105, 0.257427  
61494, 30544, 102.9486, 0.257272  
61495, 30066, 102.8866, 0.257118  
61496, 29592, 102.8247, 0.256963  
61497, 29310, 102.7628, 0.256808  
61498, 29480, 102.7008, 0.256653  
61499, 30124, 102.6389, 0.256499  
61500, 30906, 102.5770, 0.256344  
61501, 31334, 102.5151, 0.256189  
61502, 31258, 102.4531, 0.256034  
61503, 31030, 102.3912, 0.255880  
61504, 31220, 102.3293, 0.255725  
61505, 32048, 102.2674, 0.255570  
61506, 33144, 102.2054, 0.255415  
61507, 33864, 102.1435, 0.255260  
61508, 33858, 102.0816, 0.255106  
61509, 33362, 102.0197, 0.254951  
61510, 32918, 101.9577, 0.254796  
61511, 32896, 101.8958, 0.254641  
61512, 33184, 101.8339, 0.254487  
61513, 33430, 101.7719, 0.254332  
61514, 33392, 101.7100, 0.254177  
61515, 33134, 101.6481, 0.254022  
61516, 32900, 101.5862, 0.253868  
61517, 32842, 101.5242, 0.253713  
61518, 32914, 101.4623, 0.253558

61519, 32948, 101.4004, 0.253403  
61520, 32808, 101.3385, 0.253249  
61521, 32426, 101.2765, 0.253094  
61522, 31822, 101.2146, 0.252939  
61523, 31106, 101.1527, 0.252784  
61524, 30446, 101.0907, 0.252630  
61525, 30022, 101.0288, 0.252475  
61526, 29882, 100.9669, 0.252320  
61527, 29918, 100.9050, 0.252165  
61528, 29942, 100.8430, 0.252011  
61529, 29910, 100.7811, 0.251856  
61530, 29948, 100.7192, 0.251701  
61531, 30226, 100.6573, 0.251546  
61532, 30744, 100.5953, 0.251392  
61533, 31274, 100.5334, 0.251237  
61534, 31512, 100.4715, 0.251082  
61535, 31340, 100.4096, 0.250927  
61536, 30874, 100.3476, 0.250773  
61537, 30342, 100.2857, 0.250618  
61538, 29902, 100.2238, 0.250463  
61539, 29572, 100.1618, 0.250308  
61540, 29330, 100.0999, 0.250153  
61541, 29212, 100.0380, 0.249999  
61542, 29268, 99.9761, 0.249844  
61543, 29520, 99.9141, 0.249689  
61544, 29922, 99.8522, 0.249534  
61545, 30430, 99.7903, 0.249380  
61546, 30994, 99.7284, 0.249225  
61547, 31558, 99.6664, 0.249070  
61548, 32004, 99.6045, 0.248915  
61549, 32210, 99.5426, 0.248761  
61550, 32168, 99.4806, 0.248606  
61551, 32044, 99.4187, 0.248451  
61552, 32038, 99.3568, 0.248296  
61553, 32194, 99.2949, 0.248142  
61554, 32320, 99.2329, 0.247987  
61555, 32192, 99.1710, 0.247832  
61556, 31764, 99.1091, 0.247677  
61557, 31246, 99.0472, 0.247523  
61558, 30894, 98.9852, 0.247368  
61559, 30794, 98.9233, 0.247213  
61560, 30822, 98.8614, 0.247058  
61561, 30848, 98.7995, 0.246904  
61562, 30866, 98.7375, 0.246749  
61563, 31002, 98.6756, 0.246594  
61564, 31292, 98.6137, 0.246439  
61565, 31644, 98.5517, 0.246285  
61566, 31914, 98.4898, 0.246130  
61567, 32100, 98.4279, 0.245975  
61568, 32316, 98.3660, 0.245820  
61569, 32608, 98.3040, 0.245666  
61570, 32848, 98.2421, 0.245511  
61571, 32824, 98.1802, 0.245356  
61572, 32504, 98.1183, 0.245201  
61573, 32086, 98.0563, 0.245046  
61574, 31852, 97.9944, 0.244892  
61575, 31908, 97.9325, 0.244737  
61576, 32162, 97.8705, 0.244582  
61577, 32488, 97.8086, 0.244427  
61578, 32916, 97.7467, 0.244273  
61579, 33512, 97.6848, 0.244118  
61580, 34136, 97.6228, 0.243963  
61581, 34386, 97.5609, 0.243808  
61582, 33924, 97.4990, 0.243654  
61583, 32874, 97.4371, 0.243499  
61584, 31850, 97.3751, 0.243344  
61585, 31504, 97.3132, 0.243189  
61586, 31968, 97.2513, 0.243035  
61587, 32768, 97.1894, 0.242880  
61588, 33278, 97.1274, 0.242725  
61589, 33308, 97.0655, 0.242570  
61590, 33178, 97.0036, 0.242416  
61591, 33334, 96.9416, 0.242261  
61592, 33838, 96.8797, 0.242106  
61593, 34278, 96.8178, 0.241951  
61594, 34208, 96.7559, 0.241797

61595, 33544, 96.6939, 0.241642  
61596, 32644, 96.6320, 0.241487  
61597, 31978, 96.5701, 0.241332  
61598, 31778, 96.5082, 0.241178  
61599, 31958, 96.4462, 0.241023  
61600, 32242, 96.3843, 0.240868  
61601, 32370, 96.3224, 0.240713  
61602, 32148, 96.2604, 0.240559  
61603, 31514, 96.1985, 0.240404  
61604, 30542, 96.1366, 0.240249  
61605, 29482, 96.0747, 0.240094  
61606, 28642, 96.0127, 0.239939  
61607, 28168, 95.9508, 0.239785  
61608, 27964, 95.8889, 0.239630  
61609, 27794, 95.8270, 0.239475  
61610, 27556, 95.7650, 0.239320  
61611, 27380, 95.7031, 0.239166  
61612, 27496, 95.6412, 0.239011  
61613, 27976, 95.5793, 0.238856  
61614, 28688, 95.5173, 0.238701  
61615, 29434, 95.4554, 0.238547  
61616, 30098, 95.3935, 0.238392  
61617, 30646, 95.3315, 0.238237  
61618, 30996, 95.2696, 0.238082  
61619, 31006, 95.2077, 0.237928  
61620, 30630, 95.1458, 0.237773  
61621, 30108, 95.0838, 0.237618  
61622, 29828, 95.0219, 0.237463  
61623, 29980, 94.9600, 0.237309  
61624, 30362, 94.8981, 0.237154  
61625, 30530, 94.8361, 0.236999  
61626, 30242, 94.7742, 0.236844  
61627, 29704, 94.7123, 0.236690  
61628, 29330, 94.6504, 0.236535  
61629, 29296, 94.5884, 0.236380  
61630, 29370, 94.5265, 0.236225  
61631, 29196, 94.4646, 0.236071  
61632, 28786, 94.4026, 0.235916  
61633, 28566, 94.3407, 0.235761  
61634, 29038, 94.2788, 0.235606  
61635, 30246, 94.2169, 0.235452  
61636, 31718, 94.1549, 0.235297  
61637, 32844, 94.0930, 0.235142  
61638, 33336, 94.0311, 0.234987  
61639, 33310, 93.9692, 0.234832  
61640, 33014, 93.9072, 0.234678  
61641, 32566, 93.8453, 0.234523  
61642, 31982, 93.7834, 0.234368  
61643, 31340, 93.7214, 0.234213  
61644, 30842, 93.6595, 0.234059  
61645, 30640, 93.5976, 0.233904  
61646, 30666, 93.5357, 0.233749  
61647, 30744, 93.4737, 0.233594  
61648, 30818, 93.4118, 0.233440  
61649, 31064, 93.3499, 0.233285  
61650, 31672, 93.2880, 0.233130  
61651, 32536, 93.2260, 0.232975  
61652, 33216, 93.1641, 0.232821  
61653, 33290, 93.1022, 0.232666  
61654, 32678, 93.0403, 0.232511  
61655, 31700, 92.9783, 0.232356  
61656, 30756, 92.9164, 0.232202  
61657, 30028, 92.8545, 0.232047  
61658, 29464, 92.7925, 0.231892  
61659, 29032, 92.7306, 0.231737  
61660, 28810, 92.6687, 0.231583  
61661, 28854, 92.6068, 0.231428  
61662, 29042, 92.5448, 0.231273  
61663, 29128, 92.4829, 0.231118  
61664, 28982, 92.4210, 0.230964  
61665, 28780, 92.3591, 0.230809  
61666, 28810, 92.2971, 0.230654  
61667, 29144, 92.2352, 0.230499  
61668, 29506, 92.1733, 0.230345  
61669, 29556, 92.1113, 0.230190  
61670, 29278, 92.0494, 0.230035

61671, 28984, 91.9875, 0.229880  
61672, 28990, 91.9256, 0.229725  
61673, 29254, 91.8636, 0.229571  
61674, 29454, 91.8017, 0.229416  
61675, 29404, 91.7398, 0.229261  
61676, 29310, 91.6779, 0.229106  
61677, 29600, 91.6159, 0.228952  
61678, 30428, 91.5540, 0.228797  
61679, 31468, 91.4921, 0.228642  
61680, 32198, 91.4302, 0.228487  
61681, 32384, 91.3683, 0.228333  
61682, 32248, 91.3063, 0.228178  
61683, 32156, 91.2444, 0.228023  
61684, 32196, 91.1824, 0.227868  
61685, 32144, 91.1205, 0.227714  
61686, 31748, 91.0586, 0.227559  
61687, 31058, 90.9967, 0.227404  
61688, 30360, 90.9347, 0.227249  
61689, 29856, 90.8728, 0.227095  
61690, 29474, 90.8109, 0.226940  
61691, 29062, 90.7490, 0.226785  
61692, 28644, 90.6870, 0.226630  
61693, 28486, 90.6251, 0.226476  
61694, 28756, 90.5632, 0.226321  
61695, 29312, 90.5012, 0.226166  
61696, 29752, 90.4393, 0.226011  
61697, 29858, 90.3774, 0.225857  
61698, 29806, 90.3155, 0.225702  
61699, 30010, 90.2535, 0.225547  
61700, 30680, 90.1916, 0.225392  
61701, 31620, 90.1297, 0.225237  
61702, 32416, 90.0678, 0.225083  
61703, 32816, 90.0058, 0.224928  
61704, 32896, 89.9439, 0.224773  
61705, 32834, 89.8820, 0.224618  
61706, 32692, 89.8201, 0.224464  
61707, 32384, 89.7581, 0.224309  
61708, 31892, 89.6962, 0.224154  
61709, 31424, 89.6343, 0.223999  
61710, 31268, 89.5723, 0.223845  
61711, 31542, 89.5104, 0.223690  
61712, 32062, 89.4485, 0.223535  
61713, 32546, 89.3866, 0.223380  
61714, 32836, 89.3246, 0.223226  
61715, 32972, 89.2627, 0.223071  
61716, 33016, 89.2008, 0.222916  
61717, 32918, 89.1389, 0.222761  
61718, 32580, 89.0769, 0.222607  
61719, 32054, 89.0150, 0.222452  
61720, 31608, 88.9531, 0.222297  
61721, 31534, 88.8911, 0.222142  
61722, 31906, 88.8292, 0.221988  
61723, 32534, 88.7673, 0.221833  
61724, 33128, 88.7054, 0.221678  
61725, 33508, 88.6434, 0.221523  
61726, 33636, 88.5815, 0.221369  
61727, 33546, 88.5196, 0.221214  
61728, 33248, 88.4577, 0.221059  
61729, 32804, 88.3957, 0.220904  
61730, 32360, 88.3338, 0.220750  
61731, 32116, 88.2719, 0.220595  
61732, 32180, 88.2100, 0.220440  
61733, 32490, 88.1480, 0.220285  
61734, 32912, 88.0861, 0.220130  
61735, 33386, 88.0242, 0.219976  
61736, 33928, 87.9622, 0.219821  
61737, 34532, 87.9003, 0.219666  
61738, 35046, 87.8384, 0.219511  
61739, 35274, 87.7765, 0.219357  
61740, 35162, 87.7145, 0.219202  
61741, 34852, 87.6526, 0.219047  
61742, 34516, 87.5907, 0.218892  
61743, 34138, 87.5288, 0.218738  
61744, 33524, 87.4668, 0.218583  
61745, 32564, 87.4049, 0.218428  
61746, 31470, 87.3430, 0.218273

61747, 30698, 87.2810, 0.218119  
61748, 30590, 87.2191, 0.217964  
61749, 31066, 87.1572, 0.217809  
61750, 31694, 87.0953, 0.217654  
61751, 32028, 87.0333, 0.217500  
61752, 31944, 86.9714, 0.217345  
61753, 31640, 86.9095, 0.217190  
61754, 31414, 86.8476, 0.217035  
61755, 31432, 86.7856, 0.216881  
61756, 31682, 86.7237, 0.216726  
61757, 32054, 86.6618, 0.216571  
61758, 32406, 86.5999, 0.216416  
61759, 32566, 86.5379, 0.216262  
61760, 32412, 86.4760, 0.216107  
61761, 31990, 86.4141, 0.215952  
61762, 31566, 86.3521, 0.215797  
61763, 31472, 86.2902, 0.215643  
61764, 31828, 86.2283, 0.215488  
61765, 32456, 86.1664, 0.215333  
61766, 33042, 86.1044, 0.215178  
61767, 33434, 86.0425, 0.215023  
61768, 33738, 85.9806, 0.214869  
61769, 34120, 85.9187, 0.214714  
61770, 34524, 85.8567, 0.214559  
61771, 34666, 85.7948, 0.214404  
61772, 34342, 85.7329, 0.214250  
61773, 33672, 85.6709, 0.214095  
61774, 33070, 85.6090, 0.213940  
61775, 32868, 85.5471, 0.213785  
61776, 33078, 85.4852, 0.213631  
61777, 33458, 85.4232, 0.213476  
61778, 33790, 85.3613, 0.213321  
61779, 34012, 85.2994, 0.213166  
61780, 34122, 85.2375, 0.213012  
61781, 33978, 85.1755, 0.212857  
61782, 33396, 85.1136, 0.212702  
61783, 32418, 85.0517, 0.212547  
61784, 31460, 84.9898, 0.212393  
61785, 31050, 84.9278, 0.212238  
61786, 31380, 84.8659, 0.212083  
61787, 32130, 84.8040, 0.211928  
61788, 32730, 84.7420, 0.211774  
61789, 32886, 84.6801, 0.211619  
61790, 32752, 84.6182, 0.211464  
61791, 32656, 84.5563, 0.211309  
61792, 32722, 84.4943, 0.211155  
61793, 32776, 84.4324, 0.211000  
61794, 32626, 84.3705, 0.210845  
61795, 32320, 84.3086, 0.210690  
61796, 32102, 84.2466, 0.210536  
61797, 32042, 84.1847, 0.210381  
61798, 31896, 84.1228, 0.210226  
61799, 31314, 84.0608, 0.210071  
61800, 30244, 83.9989, 0.209916  
61801, 29052, 83.9370, 0.209762  
61802, 28256, 83.8751, 0.209607  
61803, 28114, 83.8131, 0.209452  
61804, 28488, 83.7512, 0.209297  
61805, 29076, 83.6893, 0.209143  
61806, 29662, 83.6274, 0.208988  
61807, 30170, 83.5654, 0.208833  
61808, 30518, 83.5035, 0.208678  
61809, 30576, 83.4416, 0.208524  
61810, 30332, 83.3797, 0.208369  
61811, 30018, 83.3177, 0.208214  
61812, 29978, 83.2558, 0.208059  
61813, 30340, 83.1939, 0.207905  
61814, 30822, 83.1319, 0.207750  
61815, 30960, 83.0700, 0.207595  
61816, 30536, 83.0081, 0.207440  
61817, 29786, 82.9462, 0.207286  
61818, 29192, 82.8842, 0.207131  
61819, 29046, 82.8223, 0.206976  
61820, 29270, 82.7604, 0.206821  
61821, 29604, 82.6985, 0.206667  
61822, 29878, 82.6365, 0.206512

61823, 30102, 82.5746, 0.206357  
61824, 30298, 82.5127, 0.206202  
61825, 30374, 82.4507, 0.206048  
61826, 30216, 82.3888, 0.205893  
61827, 29888, 82.3269, 0.205738  
61828, 29612, 82.2650, 0.205583  
61829, 29580, 82.2030, 0.205429  
61830, 29718, 82.1411, 0.205274  
61831, 29820, 82.0792, 0.205119  
61832, 29804, 82.0173, 0.204964  
61833, 29868, 81.9553, 0.204809  
61834, 30252, 81.8934, 0.204655  
61835, 30938, 81.8315, 0.204500  
61836, 31576, 81.7696, 0.204345  
61837, 31826, 81.7076, 0.204190  
61838, 31700, 81.6457, 0.204036  
61839, 31520, 81.5838, 0.203881  
61840, 31520, 81.5218, 0.203726  
61841, 31546, 81.4599, 0.203571  
61842, 31274, 81.3980, 0.203417  
61843, 30638, 81.3361, 0.203262  
61844, 30032, 81.2741, 0.203107  
61845, 29988, 81.2122, 0.202952  
61846, 30602, 81.1503, 0.202798  
61847, 31420, 81.0884, 0.202643  
61848, 31844, 81.0264, 0.202488  
61849, 31704, 80.9645, 0.202333  
61850, 31364, 80.9026, 0.202179  
61851, 31272, 80.8407, 0.202024  
61852, 31462, 80.7787, 0.201869  
61853, 31548, 80.7168, 0.201714  
61854, 31192, 80.6549, 0.201560  
61855, 30488, 80.5929, 0.201405  
61856, 29916, 80.5310, 0.201250  
61857, 29850, 80.4691, 0.201095  
61858, 30272, 80.4072, 0.200941  
61859, 30848, 80.3452, 0.200786  
61860, 31324, 80.2833, 0.200631  
61861, 31664, 80.2214, 0.200476  
61862, 31952, 80.1595, 0.200322  
61863, 32152, 80.0975, 0.200167  
61864, 32162, 80.0356, 0.200012  
61865, 32008, 79.9737, 0.199857  
61866, 31936, 79.9117, 0.199702  
61867, 32152, 79.8498, 0.199548  
61868, 32576, 79.7879, 0.199393  
61869, 32822, 79.7260, 0.199238  
61870, 32562, 79.6640, 0.199083  
61871, 31910, 79.6021, 0.198929  
61872, 31344, 79.5402, 0.198774  
61873, 31284, 79.4783, 0.198619  
61874, 31702, 79.4163, 0.198464  
61875, 32144, 79.3544, 0.198310  
61876, 32176, 79.2925, 0.198155  
61877, 31726, 79.2306, 0.198000  
61878, 31100, 79.1686, 0.197845  
61879, 30654, 79.1067, 0.197691  
61880, 30578, 79.0448, 0.197536  
61881, 30836, 78.9828, 0.197381  
61882, 31322, 78.9209, 0.197226  
61883, 31876, 78.8590, 0.197072  
61884, 32282, 78.7971, 0.196917  
61885, 32296, 78.7351, 0.196762  
61886, 31826, 78.6732, 0.196607  
61887, 31080, 78.6113, 0.196453  
61888, 30496, 78.5494, 0.196298  
61889, 30438, 78.4874, 0.196143  
61890, 30922, 78.4255, 0.195988  
61891, 31636, 78.3636, 0.195834  
61892, 32248, 78.3016, 0.195679  
61893, 32596, 78.2397, 0.195524  
61894, 32714, 78.1778, 0.195369  
61895, 32644, 78.1159, 0.195215  
61896, 32368, 78.0539, 0.195060  
61897, 31884, 77.9920, 0.194905  
61898, 31324, 77.9301, 0.194750

61899, 30904, 77.8682, 0.194595  
61900, 30744, 77.8062, 0.194441  
61901, 30744, 77.7443, 0.194286  
61902, 30700, 77.6824, 0.194131  
61903, 30534, 77.6205, 0.193976  
61904, 30362, 77.5585, 0.193822  
61905, 30360, 77.4966, 0.193667  
61906, 30552, 77.4347, 0.193512  
61907, 30826, 77.3727, 0.193357  
61908, 31070, 77.3108, 0.193203  
61909, 31338, 77.2489, 0.193048  
61910, 31748, 77.1870, 0.192893  
61911, 32266, 77.1250, 0.192738  
61912, 32652, 77.0631, 0.192584  
61913, 32642, 77.0012, 0.192429  
61914, 32214, 76.9393, 0.192274  
61915, 31616, 76.8773, 0.192119  
61916, 31162, 76.8154, 0.191965  
61917, 30936, 76.7535, 0.191810  
61918, 30788, 76.6915, 0.191655  
61919, 30538, 76.6296, 0.191500  
61920, 30184, 76.5677, 0.191346  
61921, 29956, 76.5058, 0.191191  
61922, 30090, 76.4438, 0.191036  
61923, 30670, 76.3819, 0.190881  
61924, 31556, 76.3200, 0.190727  
61925, 32504, 76.2581, 0.190572  
61926, 33234, 76.1961, 0.190417  
61927, 33542, 76.1342, 0.190262  
61928, 33366, 76.0723, 0.190108  
61929, 32866, 76.0104, 0.189953  
61930, 32384, 75.9484, 0.189798  
61931, 32240, 75.8865, 0.189643  
61932, 32486, 75.8246, 0.189488  
61933, 32872, 75.7626, 0.189334  
61934, 33042, 75.7007, 0.189179  
61935, 32834, 75.6388, 0.189024  
61936, 32386, 75.5769, 0.188869  
61937, 31942, 75.5149, 0.188715  
61938, 31588, 75.4530, 0.188560  
61939, 31230, 75.3911, 0.188405  
61940, 30764, 75.3292, 0.188250  
61941, 30292, 75.2672, 0.188096  
61942, 30062, 75.2053, 0.187941  
61943, 30190, 75.1434, 0.187786  
61944, 30544, 75.0814, 0.187631  
61945, 30836, 75.0195, 0.187477  
61946, 30920, 74.9576, 0.187322  
61947, 30900, 74.8957, 0.187167  
61948, 30950, 74.8337, 0.187012  
61949, 31092, 74.7718, 0.186858  
61950, 31142, 74.7099, 0.186703  
61951, 30906, 74.6480, 0.186548  
61952, 30398, 74.5860, 0.186393  
61953, 29836, 74.5241, 0.186239  
61954, 29454, 74.4622, 0.186084  
61955, 29322, 74.4003, 0.185929  
61956, 29404, 74.3383, 0.185774  
61957, 29654, 74.2764, 0.185620  
61958, 30056, 74.2145, 0.185465  
61959, 30554, 74.1525, 0.185310  
61960, 30986, 74.0906, 0.185155  
61961, 31230, 74.0287, 0.185001  
61962, 31320, 73.9668, 0.184846  
61963, 31434, 73.9048, 0.184691  
61964, 31698, 73.8429, 0.184536  
61965, 32010, 73.7810, 0.184381  
61966, 32142, 73.7191, 0.184227  
61967, 32008, 73.6571, 0.184072  
61968, 31818, 73.5952, 0.183917  
61969, 31860, 73.5333, 0.183762  
61970, 32192, 73.4713, 0.183608  
61971, 32564, 73.4094, 0.183453  
61972, 32672, 73.3475, 0.183298  
61973, 32528, 73.2856, 0.183143  
61974, 32450, 73.2236, 0.182989

61975, 32700, 73.1617, 0.182834  
61976, 33156, 73.0998, 0.182679  
61977, 33372, 73.0379, 0.182524  
61978, 33062, 72.9759, 0.182370  
61979, 32384, 72.9140, 0.182215  
61980, 31772, 72.8521, 0.182060  
61981, 31470, 72.7902, 0.181905  
61982, 31292, 72.7282, 0.181751  
61983, 30856, 72.6663, 0.181596  
61984, 30084, 72.6044, 0.181441  
61985, 29374, 72.5424, 0.181286  
61986, 29248, 72.4805, 0.181132  
61987, 29856, 72.4186, 0.180977  
61988, 30840, 72.3567, 0.180822  
61989, 31686, 72.2947, 0.180667  
61990, 32124, 72.2328, 0.180513  
61991, 32226, 72.1709, 0.180358  
61992, 32162, 72.1090, 0.180203  
61993, 31962, 72.0470, 0.180048  
61994, 31602, 71.9851, 0.179893  
61995, 31194, 71.9232, 0.179739  
61996, 30982, 71.8612, 0.179584  
61997, 31112, 71.7993, 0.179429  
61998, 31426, 71.7374, 0.179274  
61999, 31588, 71.6755, 0.179120  
62000, 31476, 71.6135, 0.178965  
62001, 31374, 71.5516, 0.178810  
62002, 31722, 71.4897, 0.178655  
62003, 32644, 71.4278, 0.178501  
62004, 33762, 71.3658, 0.178346  
62005, 34480, 71.3039, 0.178191  
62006, 34522, 71.2420, 0.178036  
62007, 34098, 71.1801, 0.177882  
62008, 33646, 71.1181, 0.177727  
62009, 33400, 71.0562, 0.177572  
62010, 33248, 70.9943, 0.177417  
62011, 32980, 70.9323, 0.177263  
62012, 32568, 70.8704, 0.177108  
62013, 32184, 70.8085, 0.176953  
62014, 31998, 70.7466, 0.176798  
62015, 31972, 70.6846, 0.176644  
62016, 31952, 70.6227, 0.176489  
62017, 31822, 70.5608, 0.176334  
62018, 31600, 70.4989, 0.176179  
62019, 31310, 70.4369, 0.176025  
62020, 30916, 70.3750, 0.175870  
62021, 30380, 70.3131, 0.175715  
62022, 29820, 70.2511, 0.175560  
62023, 29504, 70.1892, 0.175406  
62024, 29618, 70.1273, 0.175251  
62025, 30090, 70.0654, 0.175096  
62026, 30604, 70.0034, 0.174941  
62027, 30884, 69.9415, 0.174786  
62028, 30892, 69.8796, 0.174632  
62029, 30750, 69.8177, 0.174477  
62030, 30542, 69.7557, 0.174322  
62031, 30184, 69.6938, 0.174167  
62032, 29606, 69.6319, 0.174013  
62033, 28918, 69.5700, 0.173858  
62034, 28394, 69.5080, 0.173703  
62035, 28224, 69.4461, 0.173548  
62036, 28320, 69.3842, 0.173394  
62037, 28446, 69.3222, 0.173239  
62038, 28500, 69.2603, 0.173084  
62039, 28652, 69.1984, 0.172929  
62040, 29116, 69.1365, 0.172775  
62041, 29830, 69.0745, 0.172620  
62042, 30450, 69.0126, 0.172465  
62043, 30664, 68.9507, 0.172310  
62044, 30532, 68.8888, 0.172156  
62045, 30464, 68.8268, 0.172001  
62046, 30778, 68.7649, 0.171846  
62047, 31390, 68.7030, 0.171691  
62048, 31896, 68.6410, 0.171537  
62049, 32010, 68.5791, 0.171382  
62050, 31810, 68.5172, 0.171227

62051, 31626, 68.4553, 0.171072  
62052, 31624, 68.3933, 0.170918  
62053, 31658, 68.3314, 0.170763  
62054, 31448, 68.2695, 0.170608  
62055, 30972, 68.2076, 0.170453  
62056, 30530, 68.1456, 0.170299  
62057, 30466, 68.0837, 0.170144  
62058, 30820, 68.0218, 0.169989  
62059, 31316, 67.9599, 0.169834  
62060, 31668, 67.8979, 0.169679  
62061, 31852, 67.8360, 0.169525  
62062, 32078, 67.7741, 0.169370  
62063, 32494, 67.7121, 0.169215  
62064, 32968, 67.6502, 0.169060  
62065, 33168, 67.5883, 0.168906  
62066, 32876, 67.5264, 0.168751  
62067, 32214, 67.4644, 0.168596  
62068, 31526, 67.4025, 0.168441  
62069, 31142, 67.3406, 0.168287  
62070, 31184, 67.2787, 0.168132  
62071, 31518, 67.2167, 0.167977  
62072, 31884, 67.1548, 0.167822  
62073, 32030, 67.0929, 0.167668  
62074, 31824, 67.0310, 0.167513  
62075, 31272, 66.9690, 0.167358  
62076, 30564, 66.9071, 0.167203  
62077, 29940, 66.8452, 0.167049  
62078, 29578, 66.7832, 0.166894  
62079, 29498, 66.7213, 0.166739  
62080, 29604, 66.6594, 0.166584  
62081, 29800, 66.5975, 0.166430  
62082, 30018, 66.5355, 0.166275  
62083, 30210, 66.4736, 0.166120  
62084, 30288, 66.4117, 0.165965  
62085, 30170, 66.3498, 0.165811  
62086, 29898, 66.2878, 0.165656  
62087, 29684, 66.2259, 0.165501  
62088, 29742, 66.1640, 0.165346  
62089, 30110, 66.1020, 0.165192  
62090, 30616, 66.0401, 0.165037  
62091, 31026, 65.9782, 0.164882  
62092, 31314, 65.9163, 0.164727  
62093, 31630, 65.8543, 0.164572  
62094, 32138, 65.7924, 0.164418  
62095, 32782, 65.7305, 0.164263  
62096, 33320, 65.6686, 0.164108  
62097, 33568, 65.6066, 0.163953  
62098, 33516, 65.5447, 0.163799  
62099, 33252, 65.4828, 0.163644  
62100, 32798, 65.4209, 0.163489  
62101, 32084, 65.3589, 0.163334  
62102, 31170, 65.2970, 0.163180  
62103, 30358, 65.2351, 0.163025  
62104, 30044, 65.1731, 0.162870  
62105, 30338, 65.1112, 0.162715  
62106, 30844, 65.0493, 0.162561  
62107, 30964, 64.9874, 0.162406  
62108, 30416, 64.9254, 0.162251  
62109, 29528, 64.8635, 0.162096  
62110, 28950, 64.8016, 0.161942  
62111, 29092, 64.7397, 0.161787  
62112, 29798, 64.6777, 0.161632  
62113, 30582, 64.6158, 0.161477  
62114, 31070, 64.5539, 0.161323  
62115, 31272, 64.4919, 0.161168  
62116, 31370, 64.4300, 0.161013  
62117, 31426, 64.3681, 0.160858  
62118, 31326, 64.3062, 0.160704  
62119, 31040, 64.2442, 0.160549  
62120, 30792, 64.1823, 0.160394  
62121, 30946, 64.1204, 0.160239  
62122, 31634, 64.0585, 0.160085  
62123, 32580, 63.9965, 0.159930  
62124, 33324, 63.9346, 0.159775  
62125, 33602, 63.8727, 0.159620  
62126, 33512, 63.8108, 0.159465

62127, 33346, 63.7488, 0.159311  
62128, 33286, 63.6869, 0.159156  
62129, 33278, 63.6250, 0.159001  
62130, 33208, 63.5630, 0.158846  
62131, 33044, 63.5011, 0.158692  
62132, 32834, 63.4392, 0.158537  
62133, 32622, 63.3773, 0.158382  
62134, 32394, 63.3153, 0.158227  
62135, 32194, 63.2534, 0.158073  
62136, 32146, 63.1915, 0.157918  
62137, 32352, 63.1296, 0.157763  
62138, 32700, 63.0676, 0.157608  
62139, 32852, 63.0057, 0.157454  
62140, 32542, 62.9438, 0.157299  
62141, 31860, 62.8818, 0.157144  
62142, 31228, 62.8199, 0.156989  
62143, 31040, 62.7580, 0.156835  
62144, 31336, 62.6961, 0.156680  
62145, 31788, 62.6341, 0.156525  
62146, 32038, 62.5722, 0.156370  
62147, 31976, 62.5103, 0.156216  
62148, 31730, 62.4484, 0.156061  
62149, 31462, 62.3864, 0.155906  
62150, 31232, 62.3245, 0.155751  
62151, 31090, 62.2626, 0.155597  
62152, 31198, 62.2007, 0.155442  
62153, 31684, 62.1387, 0.155287  
62154, 32402, 62.0768, 0.155132  
62155, 32892, 62.0149, 0.154978  
62156, 32700, 61.9529, 0.154823  
62157, 31840, 61.8910, 0.154668  
62158, 30854, 61.8291, 0.154513  
62159, 30356, 61.7672, 0.154358  
62160, 30472, 61.7052, 0.154204  
62161, 30776, 61.6433, 0.154049  
62162, 30762, 61.5814, 0.153894  
62163, 30392, 61.5195, 0.153739  
62164, 30124, 61.4575, 0.153585  
62165, 30400, 61.3956, 0.153430  
62166, 31192, 61.3337, 0.153275  
62167, 32034, 61.2717, 0.153120  
62168, 32554, 61.2098, 0.152966  
62169, 32834, 61.1479, 0.152811  
62170, 33238, 61.0860, 0.152656  
62171, 33896, 61.0240, 0.152501  
62172, 34480, 60.9621, 0.152347  
62173, 34504, 60.9002, 0.152192  
62174, 33840, 60.8383, 0.152037  
62175, 32920, 60.7763, 0.151882  
62176, 32338, 60.7144, 0.151728  
62177, 32322, 60.6525, 0.151573  
62178, 32580, 60.5906, 0.151418  
62179, 32656, 60.5286, 0.151263  
62180, 32364, 60.4667, 0.151109  
62181, 31872, 60.4048, 0.150954  
62182, 31456, 60.3428, 0.150799  
62183, 31192, 60.2809, 0.150644  
62184, 30950, 60.2190, 0.150490  
62185, 30604, 60.1571, 0.150335  
62186, 30168, 60.0951, 0.150180  
62187, 29724, 60.0332, 0.150025  
62188, 29256, 59.9713, 0.149871  
62189, 28706, 59.9094, 0.149716  
62190, 28106, 59.8474, 0.149561  
62191, 27694, 59.7855, 0.149406  
62192, 27782, 59.7236, 0.149251  
62193, 28482, 59.6616, 0.149097  
62194, 29596, 59.5997, 0.148942  
62195, 30736, 59.5378, 0.148787  
62196, 31588, 59.4759, 0.148632  
62197, 32052, 59.4139, 0.148478  
62198, 32204, 59.3520, 0.148323  
62199, 32192, 59.2901, 0.148168  
62200, 32162, 59.2282, 0.148013  
62201, 32232, 59.1662, 0.147859  
62202, 32412, 59.1043, 0.147704

62203, 32520, 59.0424, 0.147549  
62204, 32254, 58.9805, 0.147394  
62205, 31426, 58.9185, 0.147240  
62206, 30172, 58.8566, 0.147085  
62207, 28976, 58.7947, 0.146930  
62208, 28340, 58.7327, 0.146775  
62209, 28456, 58.6708, 0.146621  
62210, 29084, 58.6089, 0.146466  
62211, 29774, 58.5470, 0.146311  
62212, 30204, 58.4850, 0.146156  
62213, 30312, 58.4231, 0.146002  
62214, 30204, 58.3612, 0.145847  
62215, 30008, 58.2993, 0.145692  
62216, 29840, 58.2373, 0.145537  
62217, 29832, 58.1754, 0.145383  
62218, 30112, 58.1135, 0.145228  
62219, 30696, 58.0515, 0.145073  
62220, 31418, 57.9896, 0.144918  
62221, 32034, 57.9277, 0.144764  
62222, 32432, 57.8658, 0.144609  
62223, 32720, 57.8038, 0.144454  
62224, 33072, 57.7419, 0.144299  
62225, 33534, 57.6800, 0.144144  
62226, 33938, 57.6181, 0.143990  
62227, 34074, 57.5561, 0.143835  
62228, 33894, 57.4942, 0.143680  
62229, 33542, 57.4323, 0.143525  
62230, 33172, 57.3704, 0.143371  
62231, 32826, 57.3084, 0.143216  
62232, 32482, 57.2465, 0.143061  
62233, 32222, 57.1846, 0.142906  
62234, 32264, 57.1226, 0.142752  
62235, 32754, 57.0607, 0.142597  
62236, 33546, 56.9988, 0.142442  
62237, 34236, 56.9369, 0.142287  
62238, 34430, 56.8749, 0.142133  
62239, 34056, 56.8130, 0.141978  
62240, 33368, 56.7511, 0.141823  
62241, 32698, 56.6892, 0.141668  
62242, 32188, 56.6272, 0.141514  
62243, 31800, 56.5653, 0.141359  
62244, 31498, 56.5034, 0.141204  
62245, 31376, 56.4414, 0.141049  
62246, 31566, 56.3795, 0.140895  
62247, 32074, 56.3176, 0.140740  
62248, 32692, 56.2557, 0.140585  
62249, 33132, 56.1937, 0.140430  
62250, 33226, 56.1318, 0.140276  
62251, 32982, 56.0699, 0.140121  
62252, 32530, 56.0080, 0.139966  
62253, 32030, 55.9460, 0.139811  
62254, 31634, 55.8841, 0.139657  
62255, 31472, 55.8222, 0.139502  
62256, 31566, 55.7603, 0.139347  
62257, 31746, 55.6983, 0.139192  
62258, 31712, 55.6364, 0.139037  
62259, 31280, 55.5745, 0.138883  
62260, 30562, 55.5125, 0.138728  
62261, 29946, 55.4506, 0.138573  
62262, 29768, 55.3887, 0.138418  
62263, 30020, 55.3268, 0.138264  
62264, 30372, 55.2648, 0.138109  
62265, 30470, 55.2029, 0.137954  
62266, 30260, 55.1410, 0.137799  
62267, 30002, 55.0791, 0.137645  
62268, 29976, 55.0171, 0.137490  
62269, 30268, 54.9552, 0.137335  
62270, 30746, 54.8933, 0.137180  
62271, 31236, 54.8314, 0.137026  
62272, 31682, 54.7694, 0.136871  
62273, 32106, 54.7075, 0.136716  
62274, 32504, 54.6456, 0.136561  
62275, 32822, 54.5836, 0.136407  
62276, 33066, 54.5217, 0.136252  
62277, 33318, 54.4598, 0.136097  
62278, 33660, 54.3979, 0.135942

62279, 34030, 54.3359, 0.135788  
62280, 34250, 54.2740, 0.135633  
62281, 34232, 54.2121, 0.135478  
62282, 34116, 54.1502, 0.135323  
62283, 34174, 54.0882, 0.135169  
62284, 34510, 54.0263, 0.135014  
62285, 34884, 53.9644, 0.134859  
62286, 34872, 53.9024, 0.134704  
62287, 34240, 53.8405, 0.134549  
62288, 33144, 53.7786, 0.134395  
62289, 32036, 53.7167, 0.134240  
62290, 31286, 53.6547, 0.134085  
62291, 30978, 53.5928, 0.133930  
62292, 30946, 53.5309, 0.133776  
62293, 31012, 53.4690, 0.133621  
62294, 31044, 53.4070, 0.133466  
62295, 30960, 53.3451, 0.133311  
62296, 30682, 53.2832, 0.133157  
62297, 30166, 53.2213, 0.133002  
62298, 29554, 53.1593, 0.132847  
62299, 29126, 53.0974, 0.132692  
62300, 29138, 53.0355, 0.132538  
62301, 29610, 52.9735, 0.132383  
62302, 30322, 52.9116, 0.132228  
62303, 31000, 52.8497, 0.132073  
62304, 31468, 52.7878, 0.131919  
62305, 31702, 52.7258, 0.131764  
62306, 31728, 52.6639, 0.131609  
62307, 31572, 52.6020, 0.131454  
62308, 31338, 52.5401, 0.131300  
62309, 31196, 52.4781, 0.131145  
62310, 31320, 52.4162, 0.130990  
62311, 31706, 52.3543, 0.130835  
62312, 32144, 52.2923, 0.130681  
62313, 32412, 52.2304, 0.130526  
62314, 32486, 52.1685, 0.130371  
62315, 32570, 52.1066, 0.130216  
62316, 32842, 52.0446, 0.130062  
62317, 33238, 51.9827, 0.129907  
62318, 33500, 51.9208, 0.129752  
62319, 33450, 51.8589, 0.129597  
62320, 33208, 51.7969, 0.129442  
62321, 33048, 51.7350, 0.129288  
62322, 33118, 51.6731, 0.129133  
62323, 33254, 51.6112, 0.128978  
62324, 33206, 51.5492, 0.128823  
62325, 32894, 51.4873, 0.128669  
62326, 32528, 51.4254, 0.128514  
62327, 32328, 51.3634, 0.128359  
62328, 32264, 51.3015, 0.128204  
62329, 32074, 51.2396, 0.128050  
62330, 31576, 51.1777, 0.127895  
62331, 30932, 51.1157, 0.127740  
62332, 30522, 51.0538, 0.127585  
62333, 30586, 50.9919, 0.127431  
62334, 30986, 50.9300, 0.127276  
62335, 31336, 50.8680, 0.127121  
62336, 31388, 50.8061, 0.126966  
62337, 31244, 50.7442, 0.126812  
62338, 31184, 50.6822, 0.126657  
62339, 31402, 50.6203, 0.126502  
62340, 31866, 50.5584, 0.126347  
62341, 32456, 50.4965, 0.126193  
62342, 33150, 50.4345, 0.126038  
62343, 33968, 50.3726, 0.125883  
62344, 34814, 50.3107, 0.125728  
62345, 35392, 50.2488, 0.125574  
62346, 35416, 50.1868, 0.125419  
62347, 34898, 50.1249, 0.125264  
62348, 34178, 50.0630, 0.125109  
62349, 33706, 50.0011, 0.124955  
62350, 33646, 49.9391, 0.124800  
62351, 33792, 49.8772, 0.124645  
62352, 33776, 49.8153, 0.124490  
62353, 33340, 49.7533, 0.124335  
62354, 32516, 49.6914, 0.124181

62355, 31510, 49.6295, 0.124026  
62356, 30554, 49.5676, 0.123871  
62357, 29810, 49.5056, 0.123716  
62358, 29352, 49.4437, 0.123562  
62359, 29158, 49.3818, 0.123407  
62360, 29164, 49.3199, 0.123252  
62361, 29288, 49.2579, 0.123097  
62362, 29566, 49.1960, 0.122943  
62363, 30110, 49.1341, 0.122788  
62364, 30986, 49.0721, 0.122633  
62365, 32030, 49.0102, 0.122478  
62366, 32866, 48.9483, 0.122324  
62367, 33162, 48.8864, 0.122169  
62368, 32902, 48.8244, 0.122014  
62369, 32448, 48.7625, 0.121859  
62370, 32220, 48.7006, 0.121705  
62371, 32344, 48.6387, 0.121550  
62372, 32622, 48.5767, 0.121395  
62373, 32774, 48.5148, 0.121240  
62374, 32754, 48.4529, 0.121086  
62375, 32782, 48.3910, 0.120931  
62376, 33052, 48.3290, 0.120776  
62377, 33496, 48.2671, 0.120621  
62378, 33816, 48.2052, 0.120467  
62379, 33782, 48.1432, 0.120312  
62380, 33414, 48.0813, 0.120157  
62381, 32986, 48.0194, 0.120002  
62382, 32774, 47.9575, 0.119848  
62383, 32916, 47.8955, 0.119693  
62384, 33388, 47.8336, 0.119538  
62385, 34094, 47.7717, 0.119383  
62386, 34860, 47.7098, 0.119228  
62387, 35452, 47.6478, 0.119074  
62388, 35660, 47.5859, 0.118919  
62389, 35472, 47.5240, 0.118764  
62390, 35126, 47.4620, 0.118609  
62391, 34920, 47.4001, 0.118455  
62392, 34918, 47.3382, 0.118300  
62393, 34876, 47.2763, 0.118145  
62394, 34464, 47.2143, 0.117990  
62395, 33630, 47.1524, 0.117836  
62396, 32688, 47.0905, 0.117681  
62397, 32026, 47.0286, 0.117526  
62398, 31790, 46.9666, 0.117371  
62399, 31820, 46.9047, 0.117217  
62400, 31962, 46.8428, 0.117062  
62401, 32286, 46.7809, 0.116907  
62402, 32996, 46.7189, 0.116752  
62403, 34048, 46.6570, 0.116598  
62404, 35016, 46.5951, 0.116443  
62405, 35372, 46.5331, 0.116288  
62406, 35000, 46.4712, 0.116133  
62407, 34352, 46.4093, 0.115979  
62408, 34060, 46.3474, 0.115824  
62409, 34346, 46.2854, 0.115669  
62410, 34830, 46.2235, 0.115514  
62411, 34924, 46.1616, 0.115360  
62412, 34372, 46.0997, 0.115205  
62413, 33410, 46.0377, 0.115050  
62414, 32474, 45.9758, 0.114895  
62415, 31800, 45.9139, 0.114741  
62416, 31354, 45.8519, 0.114586  
62417, 31094, 45.7900, 0.114431  
62418, 31110, 45.7281, 0.114276  
62419, 31526, 45.6662, 0.114121  
62420, 32212, 45.6042, 0.113967  
62421, 32758, 45.5423, 0.113812  
62422, 32808, 45.4804, 0.113657  
62423, 32382, 45.4185, 0.113502  
62424, 31874, 45.3565, 0.113348  
62425, 31632, 45.2946, 0.113193  
62426, 31652, 45.2327, 0.113038  
62427, 31638, 45.1708, 0.112883  
62428, 31364, 45.1088, 0.112729  
62429, 30980, 45.0469, 0.112574  
62430, 30816, 44.9850, 0.112419

62431, 31058, 44.9230, 0.112264  
62432, 31560, 44.8611, 0.112110  
62433, 32026, 44.7992, 0.111955  
62434, 32348, 44.7373, 0.111800  
62435, 32706, 44.6753, 0.111645  
62436, 33320, 44.6134, 0.111491  
62437, 34186, 44.5515, 0.111336  
62438, 35016, 44.4896, 0.111181  
62439, 35482, 44.4276, 0.111026  
62440, 35448, 44.3657, 0.110872  
62441, 35022, 44.3038, 0.110717  
62442, 34426, 44.2418, 0.110562  
62443, 33878, 44.1799, 0.110407  
62444, 33534, 44.1180, 0.110253  
62445, 33480, 44.0561, 0.110098  
62446, 33684, 43.9941, 0.109943  
62447, 33940, 43.9322, 0.109788  
62448, 33968, 43.8703, 0.109634  
62449, 33644, 43.8084, 0.109479  
62450, 33116, 43.7464, 0.109324  
62451, 32708, 43.6845, 0.109169  
62452, 32630, 43.6226, 0.109014  
62453, 32810, 43.5607, 0.108860  
62454, 32998, 43.4987, 0.108705  
62455, 33046, 43.4368, 0.108550  
62456, 33038, 43.3749, 0.108395  
62457, 33148, 43.3129, 0.108241  
62458, 33406, 43.2510, 0.108086  
62459, 33656, 43.1891, 0.107931  
62460, 33746, 43.1272, 0.107776  
62461, 33704, 43.0652, 0.107622  
62462, 33720, 43.0033, 0.107467  
62463, 33916, 42.9414, 0.107312  
62464, 34196, 42.8795, 0.107157  
62465, 34354, 42.8175, 0.107003  
62466, 34272, 42.7556, 0.106848  
62467, 34040, 42.6937, 0.106693  
62468, 33800, 42.6317, 0.106538  
62469, 33562, 42.5698, 0.106384  
62470, 33208, 42.5079, 0.106229  
62471, 32684, 42.4460, 0.106074  
62472, 32168, 42.3840, 0.105919  
62473, 31956, 42.3221, 0.105765  
62474, 32208, 42.2602, 0.105610  
62475, 32766, 42.1983, 0.105455  
62476, 33260, 42.1363, 0.105300  
62477, 33416, 42.0744, 0.105146  
62478, 33252, 42.0125, 0.104991  
62479, 32984, 41.9506, 0.104836  
62480, 32828, 41.8886, 0.104681  
62481, 32848, 41.8267, 0.104527  
62482, 32938, 41.7648, 0.104372  
62483, 32936, 41.7028, 0.104217  
62484, 32714, 41.6409, 0.104062  
62485, 32214, 41.5790, 0.103907  
62486, 31514, 41.5171, 0.103753  
62487, 30812, 41.4551, 0.103598  
62488, 30362, 41.3932, 0.103443  
62489, 30324, 41.3313, 0.103288  
62490, 30626, 41.2694, 0.103134  
62491, 31066, 41.2074, 0.102979  
62492, 31500, 41.1455, 0.102824  
62493, 31966, 41.0836, 0.102669  
62494, 32588, 41.0217, 0.102515  
62495, 33356, 40.9597, 0.102360  
62496, 34024, 40.8978, 0.102205  
62497, 34298, 40.8359, 0.102050  
62498, 34068, 40.7739, 0.101896  
62499, 33530, 40.7120, 0.101741  
62500, 32962, 40.6501, 0.101586  
62501, 32478, 40.5882, 0.101431  
62502, 31992, 40.5262, 0.101277  
62503, 31434, 40.4643, 0.101122  
62504, 30960, 40.4024, 0.100967  
62505, 30884, 40.3405, 0.100812  
62506, 31352, 40.2785, 0.100658

62507, 32162, 40.2166, 0.100503  
62508, 32870, 40.1547, 0.100348  
62509, 33148, 40.0927, 0.100193  
62510, 33032, 40.0308, 0.100039  
62511, 32832, 39.9689, 0.099884  
62512, 32852, 39.9070, 0.099729  
62513, 33208, 39.8450, 0.099574  
62514, 33826, 39.7831, 0.099420  
62515, 34556, 39.7212, 0.099265  
62516, 35248, 39.6593, 0.099110  
62517, 35714, 39.5973, 0.098955  
62518, 35804, 39.5354, 0.098800  
62519, 35516, 39.4735, 0.098646  
62520, 35066, 39.4116, 0.098491  
62521, 34762, 39.3496, 0.098336  
62522, 34742, 39.2877, 0.098181  
62523, 34864, 39.2258, 0.098027  
62524, 34854, 39.1638, 0.097872  
62525, 34576, 39.1019, 0.097717  
62526, 34172, 39.0400, 0.097562  
62527, 33854, 38.9781, 0.097408  
62528, 33668, 38.9161, 0.097253  
62529, 33452, 38.8542, 0.097098  
62530, 33098, 38.7923, 0.096943  
62531, 32758, 38.7304, 0.096789  
62532, 32754, 38.6684, 0.096634  
62533, 33198, 38.6065, 0.096479  
62534, 33794, 38.5446, 0.096324  
62535, 34004, 38.4826, 0.096170  
62536, 33500, 38.4207, 0.096015  
62537, 32462, 38.3588, 0.095860  
62538, 31418, 38.2969, 0.095705  
62539, 30822, 38.2349, 0.095551  
62540, 30772, 38.1730, 0.095396  
62541, 31076, 38.1111, 0.095241  
62542, 31512, 38.0492, 0.095086  
62543, 31972, 37.9872, 0.094932  
62544, 32418, 37.9253, 0.094777  
62545, 32776, 37.8634, 0.094622  
62546, 32998, 37.8015, 0.094467  
62547, 33146, 37.7395, 0.094313  
62548, 33408, 37.6776, 0.094158  
62549, 33890, 37.6157, 0.094003  
62550, 34472, 37.5537, 0.093848  
62551, 34844, 37.4918, 0.093693  
62552, 34778, 37.4299, 0.093539  
62553, 34362, 37.3680, 0.093384  
62554, 33908, 37.3060, 0.093229  
62555, 33682, 37.2441, 0.093074  
62556, 33688, 37.1822, 0.092920  
62557, 33724, 37.1203, 0.092765  
62558, 33612, 37.0583, 0.092610  
62559, 33340, 36.9964, 0.092455  
62560, 32998, 36.9345, 0.092301  
62561, 32662, 36.8725, 0.092146  
62562, 32358, 36.8106, 0.091991  
62563, 32140, 36.7487, 0.091836  
62564, 32102, 36.6868, 0.091682  
62565, 32284, 36.6248, 0.091527  
62566, 32560, 36.5629, 0.091372  
62567, 32714, 36.5010, 0.091217  
62568, 32636, 36.4391, 0.091063  
62569, 32440, 36.3771, 0.090908  
62570, 32344, 36.3152, 0.090753  
62571, 32420, 36.2533, 0.090598  
62572, 32490, 36.1914, 0.090444  
62573, 32326, 36.1294, 0.090289  
62574, 31964, 36.0675, 0.090134  
62575, 31720, 36.0056, 0.089979  
62576, 31940, 35.9436, 0.089825  
62577, 32664, 35.8817, 0.089670  
62578, 33562, 35.8198, 0.089515  
62579, 34268, 35.7579, 0.089360  
62580, 34698, 35.6959, 0.089205  
62581, 35052, 35.6340, 0.089051  
62582, 35552, 35.5721, 0.088896

62583, 36160, 35.5102, 0.088741  
62584, 36628, 35.4482, 0.088586  
62585, 36762, 35.3863, 0.088432  
62586, 36584, 35.3244, 0.088277  
62587, 36268, 35.2624, 0.088122  
62588, 35932, 35.2005, 0.087967  
62589, 35544, 35.1386, 0.087813  
62590, 35046, 35.0767, 0.087658  
62591, 34502, 35.0147, 0.087503  
62592, 34098, 34.9528, 0.087348  
62593, 33948, 34.8909, 0.087194  
62594, 33994, 34.8290, 0.087039  
62595, 34038, 34.7670, 0.086884  
62596, 33922, 34.7051, 0.086729  
62597, 33626, 34.6432, 0.086575  
62598, 33236, 34.5813, 0.086420  
62599, 32790, 34.5193, 0.086265  
62600, 32378, 34.4574, 0.086110  
62601, 32070, 34.3955, 0.085956  
62602, 31956, 34.3335, 0.085801  
62603, 32058, 34.2716, 0.085646  
62604, 32274, 34.2097, 0.085491  
62605, 32428, 34.1478, 0.085337  
62606, 32464, 34.0858, 0.085182  
62607, 32490, 34.0239, 0.085027  
62608, 32676, 33.9620, 0.084872  
62609, 33046, 33.9001, 0.084718  
62610, 33462, 33.8381, 0.084563  
62611, 33736, 33.7762, 0.084408  
62612, 33834, 33.7143, 0.084253  
62613, 33872, 33.6523, 0.084098  
62614, 33948, 33.5904, 0.083944  
62615, 34000, 33.5285, 0.083789  
62616, 33912, 33.4666, 0.083634  
62617, 33692, 33.4046, 0.083479  
62618, 33548, 33.3427, 0.083325  
62619, 33672, 33.2808, 0.083170  
62620, 33996, 33.2189, 0.083015  
62621, 34236, 33.1569, 0.082860  
62622, 34132, 33.0950, 0.082706  
62623, 33758, 33.0331, 0.082551  
62624, 33480, 32.9712, 0.082396  
62625, 33598, 32.9092, 0.082241  
62626, 34048, 32.8473, 0.082087  
62627, 34434, 32.7854, 0.081932  
62628, 34372, 32.7234, 0.081777  
62629, 33774, 32.6615, 0.081622  
62630, 32884, 32.5996, 0.081468  
62631, 32022, 32.5377, 0.081313  
62632, 31358, 32.4757, 0.081158  
62633, 30910, 32.4138, 0.081003  
62634, 30664, 32.3519, 0.080849  
62635, 30608, 32.2900, 0.080694  
62636, 30748, 32.2280, 0.080539  
62637, 31018, 32.1661, 0.080384  
62638, 31322, 32.1042, 0.080230  
62639, 31602, 32.0422, 0.080075  
62640, 31828, 31.9803, 0.079920  
62641, 31972, 31.9184, 0.079765  
62642, 32002, 31.8565, 0.079611  
62643, 31914, 31.7945, 0.079456  
62644, 31818, 31.7326, 0.079301  
62645, 31900, 31.6707, 0.079146  
62646, 32224, 31.6088, 0.078991  
62647, 32642, 31.5468, 0.078837  
62648, 32886, 31.4849, 0.078682  
62649, 32820, 31.4230, 0.078527  
62650, 32536, 31.3611, 0.078372  
62651, 32236, 31.2991, 0.078218  
62652, 31996, 31.2372, 0.078063  
62653, 31706, 31.1753, 0.077908  
62654, 31256, 31.1133, 0.077753  
62655, 30746, 31.0514, 0.077599  
62656, 30432, 30.9895, 0.077444  
62657, 30456, 30.9276, 0.077289  
62658, 30670, 30.8656, 0.077134



62659, 30802, 30.8037, 0.076980  
62660, 30752, 30.7418, 0.076825  
62661, 30740, 30.6799, 0.076670  
62662, 31040, 30.6179, 0.076515  
62663, 31632, 30.5560, 0.076361  
62664, 32176, 30.4941, 0.076206  
62665, 32348, 30.4321, 0.076051  
62666, 32224, 30.3702, 0.075896  
62667, 32208, 30.3083, 0.075742  
62668, 32560, 30.2464, 0.075587  
62669, 33058, 30.1844, 0.075432  
62670, 33198, 30.1225, 0.075277  
62671, 32726, 30.0606, 0.075123  
62672, 32002, 29.9987, 0.074968  
62673, 31694, 29.9367, 0.074813  
62674, 32144, 29.8748, 0.074658  
62675, 33016, 29.8129, 0.074504  
62676, 33604, 29.7510, 0.074349  
62677, 33468, 29.6890, 0.074194  
62678, 32788, 29.6271, 0.074039  
62679, 32112, 29.5652, 0.073884  
62680, 31812, 29.5032, 0.073730  
62681, 31838, 29.4413, 0.073575  
62682, 31902, 29.3794, 0.073420  
62683, 31822, 29.3175, 0.073265  
62684, 31668, 29.2555, 0.073111  
62685, 31566, 29.1936, 0.072956  
62686, 31528, 29.1317, 0.072801  
62687, 31482, 29.0698, 0.072646  
62688, 31462, 29.0078, 0.072492  
62689, 31610, 28.9459, 0.072337  
62690, 32032, 28.8840, 0.072182  
62691, 32612, 28.8220, 0.072027  
62692, 33094, 28.7601, 0.071873  
62693, 33318, 28.6982, 0.071718  
62694, 33376, 28.6363, 0.071563  
62695, 33480, 28.5743, 0.071408  
62696, 33694, 28.5124, 0.071254  
62697, 33868, 28.4505, 0.071099  
62698, 33856, 28.3886, 0.070944  
62699, 33708, 28.3266, 0.070789  
62700, 33680, 28.2647, 0.070635  
62701, 33932, 28.2028, 0.070480  
62702, 34322, 28.1409, 0.070325  
62703, 34534, 28.0789, 0.070170  
62704, 34382, 28.0170, 0.070016  
62705, 33970, 27.9551, 0.069861  
62706, 33584, 27.8931, 0.069706  
62707, 33418, 27.8312, 0.069551  
62708, 33460, 27.7693, 0.069397  
62709, 33562, 27.7074, 0.069242  
62710, 33610, 27.6454, 0.069087  
62711, 33530, 27.5835, 0.068932  
62712, 33206, 27.5216, 0.068777  
62713, 32530, 27.4597, 0.068623  
62714, 31546, 27.3977, 0.068468  
62715, 30598, 27.3358, 0.068313  
62716, 30132, 27.2739, 0.068158  
62717, 30372, 27.2120, 0.068004  
62718, 31106, 27.1500, 0.067849  
62719, 31884, 27.0881, 0.067694  
62720, 32404, 27.0262, 0.067539  
62721, 32704, 26.9642, 0.067385  
62722, 32992, 26.9023, 0.067230  
62723, 33326, 26.8404, 0.067075  
62724, 33554, 26.7785, 0.066920  
62725, 33596, 26.7165, 0.066766  
62726, 33676, 26.6546, 0.066611  
62727, 34182, 26.5927, 0.066456  
62728, 35236, 26.5308, 0.066301  
62729, 36446, 26.4688, 0.066147  
62730, 37162, 26.4069, 0.065992  
62731, 37056, 26.3450, 0.065837  
62732, 36424, 26.2830, 0.065682  
62733, 35884, 26.2211, 0.065528  
62734, 35816, 26.1592, 0.065373

62735, 36032, 26.0973, 0.065218  
62736, 36082, 26.0353, 0.065063  
62737, 35732, 25.9734, 0.064909  
62738, 35204, 25.9115, 0.064754  
62739, 34906, 25.8496, 0.064599  
62740, 35028, 25.7876, 0.064444  
62741, 35416, 25.7257, 0.064290  
62742, 35816, 25.6638, 0.064135  
62743, 36122, 25.6019, 0.063980  
62744, 36400, 25.5399, 0.063825  
62745, 36652, 25.4780, 0.063670  
62746, 36720, 25.4161, 0.063516  
62747, 36422, 25.3541, 0.063361  
62748, 35814, 25.2922, 0.063206  
62749, 35172, 25.2303, 0.063051  
62750, 34716, 25.1684, 0.062897  
62751, 34498, 25.1064, 0.062742  
62752, 34194, 25.0445, 0.062587  
62753, 33702, 24.9826, 0.062432  
62754, 33220, 24.9207, 0.062278  
62755, 33118, 24.8587, 0.062123  
62756, 33582, 24.7968, 0.061968  
62757, 34404, 24.7349, 0.061813  
62758, 35100, 24.6729, 0.061659  
62759, 35318, 24.6110, 0.061504  
62760, 35046, 24.5491, 0.061349  
62761, 34550, 24.4872, 0.061194  
62762, 34132, 24.4252, 0.061040  
62763, 33898, 24.3633, 0.060885  
62764, 33804, 24.3014, 0.060730  
62765, 33758, 24.2395, 0.060575  
62766, 33720, 24.1775, 0.060421  
62767, 33684, 24.1156, 0.060266  
62768, 33660, 24.0537, 0.060111  
62769, 33628, 23.9918, 0.059956  
62770, 33550, 23.9298, 0.059802  
62771, 33386, 23.8679, 0.059647  
62772, 33108, 23.8060, 0.059492  
62773, 32756, 23.7440, 0.059337  
62774, 32434, 23.6821, 0.059183  
62775, 32264, 23.6202, 0.059028  
62776, 32266, 23.5583, 0.058873  
62777, 32332, 23.4963, 0.058718  
62778, 32314, 23.4344, 0.058563  
62779, 32162, 23.3725, 0.058409  
62780, 32006, 23.3106, 0.058254  
62781, 32002, 23.2486, 0.058099  
62782, 32154, 23.1867, 0.057944  
62783, 32286, 23.1248, 0.057790  
62784, 32240, 23.0628, 0.057635  
62785, 32084, 23.0009, 0.057480  
62786, 32096, 22.9390, 0.057325  
62787, 32500, 22.8771, 0.057171  
62788, 33222, 22.8151, 0.057016  
62789, 33920, 22.7532, 0.056861  
62790, 34286, 22.6913, 0.056706  
62791, 34298, 22.6294, 0.056552  
62792, 34158, 22.5674, 0.056397  
62793, 34022, 22.5055, 0.056242  
62794, 33816, 22.4436, 0.056087  
62795, 33364, 22.3817, 0.055933  
62796, 32648, 22.3197, 0.055778  
62797, 31880, 22.2578, 0.055623  
62798, 31306, 22.1959, 0.055468  
62799, 30950, 22.1339, 0.055314  
62800, 30614, 22.0720, 0.055159  
62801, 30160, 22.0101, 0.055004  
62802, 29740, 21.9482, 0.054849  
62803, 29702, 21.8862, 0.054695  
62804, 30244, 21.8243, 0.054540  
62805, 31150, 21.7624, 0.054385  
62806, 31968, 21.7005, 0.054230  
62807, 32368, 21.6385, 0.054076  
62808, 32386, 21.5766, 0.053921  
62809, 32306, 21.5147, 0.053766  
62810, 32322, 21.4527, 0.053611

62811, 32400, 21.3908, 0.053456  
62812, 32408, 21.3289, 0.053302  
62813, 32352, 21.2670, 0.053147  
62814, 32396, 21.2050, 0.052992  
62815, 32630, 21.1431, 0.052837  
62816, 32892, 21.0812, 0.052683  
62817, 32878, 21.0193, 0.052528  
62818, 32454, 20.9573, 0.052373  
62819, 31874, 20.8954, 0.052218  
62820, 31600, 20.8335, 0.052064  
62821, 31896, 20.7716, 0.051909  
62822, 32558, 20.7096, 0.051754  
62823, 33048, 20.6477, 0.051599  
62824, 32942, 20.5858, 0.051445  
62825, 32266, 20.5238, 0.051290  
62826, 31438, 20.4619, 0.051135  
62827, 30904, 20.4000, 0.050980  
62828, 30780, 20.3381, 0.050826  
62829, 30806, 20.2761, 0.050671  
62830, 30670, 20.2142, 0.050516  
62831, 30304, 20.1523, 0.050361  
62832, 29974, 20.0904, 0.050207  
62833, 30034, 20.0284, 0.050052  
62834, 30562, 19.9665, 0.049897  
62835, 31262, 19.9046, 0.049742  
62836, 31682, 19.8426, 0.049588  
62837, 31612, 19.7807, 0.049433  
62838, 31288, 19.7188, 0.049278  
62839, 31196, 19.6569, 0.049123  
62840, 31630, 19.5949, 0.048968  
62841, 32408, 19.5330, 0.048814  
62842, 33040, 19.4711, 0.048659  
62843, 33142, 19.4092, 0.048504  
62844, 32776, 19.3472, 0.048349  
62845, 32320, 19.2853, 0.048195  
62846, 32072, 19.2234, 0.048040  
62847, 31990, 19.1615, 0.047885  
62848, 31810, 19.0995, 0.047730  
62849, 31430, 19.0376, 0.047576  
62850, 31076, 18.9757, 0.047421  
62851, 31056, 18.9137, 0.047266  
62852, 31412, 18.8518, 0.047111  
62853, 31816, 18.7899, 0.046957  
62854, 31932, 18.7280, 0.046802  
62855, 31774, 18.6660, 0.046647  
62856, 31706, 18.6041, 0.046492  
62857, 32040, 18.5422, 0.046338  
62858, 32598, 18.4803, 0.046183  
62859, 32878, 18.4183, 0.046028  
62860, 32542, 18.3564, 0.045873  
62861, 31818, 18.2945, 0.045719  
62862, 31298, 18.2325, 0.045564  
62863, 31378, 18.1706, 0.045409  
62864, 31856, 18.1087, 0.045254  
62865, 32186, 18.0468, 0.045100  
62866, 32050, 17.9848, 0.044945  
62867, 31704, 17.9229, 0.044790  
62868, 31678, 17.8610, 0.044635  
62869, 32224, 17.7991, 0.044481  
62870, 33068, 17.7371, 0.044326  
62871, 33698, 17.6752, 0.044171  
62872, 33866, 17.6133, 0.044016  
62873, 33746, 17.5514, 0.043861  
62874, 33638, 17.4894, 0.043707  
62875, 33624, 17.4275, 0.043552  
62876, 33542, 17.3656, 0.043397  
62877, 33318, 17.3036, 0.043242  
62878, 33192, 17.2417, 0.043088  
62879, 33528, 17.1798, 0.042933  
62880, 34406, 17.1179, 0.042778  
62881, 35420, 17.0559, 0.042623  
62882, 35958, 16.9940, 0.042469  
62883, 35684, 16.9321, 0.042314  
62884, 34780, 16.8702, 0.042159  
62885, 33740, 16.8082, 0.042004  
62886, 32982, 16.7463, 0.041850

62887, 32592, 16.6844, 0.041695  
62888, 32454, 16.6224, 0.041540  
62889, 32434, 16.5605, 0.041385  
62890, 32478, 16.4986, 0.041231  
62891, 32546, 16.4367, 0.041076  
62892, 32586, 16.3747, 0.040921  
62893, 32598, 16.3128, 0.040766  
62894, 32716, 16.2509, 0.040612  
62895, 33080, 16.1890, 0.040457  
62896, 33680, 16.1270, 0.040302  
62897, 34242, 16.0651, 0.040147  
62898, 34400, 16.0032, 0.039993  
62899, 33986, 15.9413, 0.039838  
62900, 33178, 15.8793, 0.039683  
62901, 32332, 15.8174, 0.039528  
62902, 31710, 15.7555, 0.039374  
62903, 31334, 15.6935, 0.039219  
62904, 31098, 15.6316, 0.039064  
62905, 30956, 15.5697, 0.038909  
62906, 30992, 15.5078, 0.038754  
62907, 31274, 15.4458, 0.038600  
62908, 31728, 15.3839, 0.038445  
62909, 32140, 15.3220, 0.038290  
62910, 32276, 15.2601, 0.038135  
62911, 32080, 15.1981, 0.037981  
62912, 31668, 15.1362, 0.037826  
62913, 31274, 15.0743, 0.037671  
62914, 31108, 15.0124, 0.037516  
62915, 31278, 14.9504, 0.037362  
62916, 31728, 14.8885, 0.037207  
62917, 32284, 14.8266, 0.037052  
62918, 32684, 14.7646, 0.036897  
62919, 32738, 14.7027, 0.036743  
62920, 32434, 14.6408, 0.036588  
62921, 31934, 14.5789, 0.036433  
62922, 31444, 14.5169, 0.036278  
62923, 31108, 14.4550, 0.036124  
62924, 30974, 14.3931, 0.035969  
62925, 31100, 14.3312, 0.035814  
62926, 31560, 14.2692, 0.035659  
62927, 32376, 14.2073, 0.035505  
62928, 33370, 14.1454, 0.035350  
62929, 34196, 14.0834, 0.035195  
62930, 34548, 14.0215, 0.035040  
62931, 34384, 13.9596, 0.034886  
62932, 33956, 13.8977, 0.034731  
62933, 33632, 13.8357, 0.034576  
62934, 33626, 13.7738, 0.034421  
62935, 33934, 13.7119, 0.034267  
62936, 34392, 13.6500, 0.034112  
62937, 34854, 13.5880, 0.033957  
62938, 35212, 13.5261, 0.033802  
62939, 35378, 13.4642, 0.033647  
62940, 35294, 13.4023, 0.033493  
62941, 34988, 13.3403, 0.033338  
62942, 34568, 13.2784, 0.033183  
62943, 34142, 13.2165, 0.033028  
62944, 33730, 13.1545, 0.032874  
62945, 33252, 13.0926, 0.032719  
62946, 32708, 13.0307, 0.032564  
62947, 32282, 12.9688, 0.032409  
62948, 32256, 12.9068, 0.032255  
62949, 32698, 12.8449, 0.032100  
62950, 33354, 12.7830, 0.031945  
62951, 33772, 12.7211, 0.031790  
62952, 33692, 12.6591, 0.031636  
62953, 33238, 12.5972, 0.031481  
62954, 32772, 12.5353, 0.031326  
62955, 32506, 12.4733, 0.031171  
62956, 32366, 12.4114, 0.031017  
62957, 32150, 12.3495, 0.030862  
62958, 31824, 12.2876, 0.030707  
62959, 31614, 12.2256, 0.030552  
62960, 31760, 12.1637, 0.030398  
62961, 32254, 12.1018, 0.030243  
62962, 32848, 12.0399, 0.030088

62963, 33284, 11.9779, 0.029933  
62964, 33516, 11.9160, 0.029779  
62965, 33660, 11.8541, 0.029624  
62966, 33756, 11.7922, 0.029469  
62967, 33710, 11.7302, 0.029314  
62968, 33430, 11.6683, 0.029160  
62969, 32984, 11.6064, 0.029005  
62970, 32602, 11.5444, 0.028850  
62971, 32442, 11.4825, 0.028695  
62972, 32428, 11.4206, 0.028540  
62973, 32414, 11.3587, 0.028386  
62974, 32390, 11.2967, 0.028231  
62975, 32520, 11.2348, 0.028076  
62976, 32910, 11.1729, 0.027921  
62977, 33380, 11.1110, 0.027767  
62978, 33570, 11.0490, 0.027612  
62979, 33318, 10.9871, 0.027457  
62980, 32890, 10.9252, 0.027302  
62981, 32736, 10.8632, 0.027148  
62982, 33024, 10.8013, 0.026993  
62983, 33406, 10.7394, 0.026838  
62984, 33360, 10.6775, 0.026683  
62985, 32746, 10.6155, 0.026529  
62986, 32010, 10.5536, 0.026374  
62987, 31758, 10.4917, 0.026219  
62988, 32198, 10.4298, 0.026064  
62989, 32950, 10.3678, 0.025910  
62990, 33448, 10.3059, 0.025755  
62991, 33444, 10.2440, 0.025600  
62992, 33124, 10.1821, 0.025445  
62993, 32768, 10.1201, 0.025291  
62994, 32438, 10.0582, 0.025136  
62995, 32016, 9.9963, 0.024981  
62996, 31516, 9.9343, 0.024826  
62997, 31210, 9.8724, 0.024672  
62998, 31364, 9.8105, 0.024517  
62999, 31912, 9.7486, 0.024362  
63000, 32450, 9.6866, 0.024207  
63001, 32632, 9.6247, 0.024053  
63002, 32544, 9.5628, 0.023898  
63003, 32610, 9.5009, 0.023743  
63004, 33116, 9.4389, 0.023588  
63005, 33886, 9.3770, 0.023433  
63006, 34450, 9.3151, 0.023279  
63007, 34528, 9.2531, 0.023124  
63008, 34278, 9.1912, 0.022969  
63009, 34078, 9.1293, 0.022814  
63010, 34090, 9.0674, 0.022660  
63011, 34146, 9.0054, 0.022505  
63012, 34016, 8.9435, 0.022350  
63013, 33742, 8.8816, 0.022195  
63014, 33620, 8.8197, 0.022041  
63015, 33830, 8.7577, 0.021886  
63016, 34214, 8.6958, 0.021731  
63017, 34406, 8.6339, 0.021576  
63018, 34222, 8.5720, 0.021422  
63019, 33856, 8.5100, 0.021267  
63020, 33626, 8.4481, 0.021112  
63021, 33648, 8.3862, 0.020957  
63022, 33748, 8.3242, 0.020803  
63023, 33718, 8.2623, 0.020648  
63024, 33600, 8.2004, 0.020493  
63025, 33614, 8.1385, 0.020338  
63026, 33846, 8.0765, 0.020184  
63027, 34072, 8.0146, 0.020029  
63028, 33936, 7.9527, 0.019874  
63029, 33326, 7.8908, 0.019719  
63030, 32508, 7.8288, 0.019565  
63031, 31872, 7.7669, 0.019410  
63032, 31594, 7.7050, 0.019255  
63033, 31530, 7.6430, 0.019100  
63034, 31436, 7.5811, 0.018946  
63035, 31232, 7.5192, 0.018791  
63036, 31060, 7.4573, 0.018636  
63037, 31092, 7.3953, 0.018481  
63038, 31386, 7.3334, 0.018326

63039, 31918, 7.2715, 0.018172  
63040, 32664, 7.2096, 0.018017  
63041, 33576, 7.1476, 0.017862  
63042, 34498, 7.0857, 0.017707  
63043, 35162, 7.0238, 0.017553  
63044, 35430, 6.9619, 0.017398  
63045, 35502, 6.8999, 0.017243  
63046, 35790, 6.8380, 0.017088  
63047, 36522, 6.7761, 0.016934  
63048, 37426, 6.7141, 0.016779  
63049, 37876, 6.6522, 0.016624  
63050, 37460, 6.5903, 0.016469  
63051, 36392, 6.5284, 0.016315  
63052, 35360, 6.4664, 0.016160  
63053, 34948, 6.4045, 0.016005  
63054, 35142, 6.3426, 0.015850  
63055, 35410, 6.2807, 0.015696  
63056, 35226, 6.2187, 0.015541  
63057, 34530, 6.1568, 0.015386  
63058, 33676, 6.0949, 0.015231  
63059, 33058, 6.0329, 0.015077  
63060, 32802, 5.9710, 0.014922  
63061, 32790, 5.9091, 0.014767  
63062, 32904, 5.8472, 0.014612  
63063, 33142, 5.7852, 0.014458  
63064, 33506, 5.7233, 0.014303  
63065, 33876, 5.6614, 0.014148  
63066, 34040, 5.5995, 0.013993  
63067, 33910, 5.5375, 0.013839  
63068, 33628, 5.4756, 0.013684  
63069, 33474, 5.4137, 0.013529  
63070, 33626, 5.3518, 0.013374  
63071, 33988, 5.2898, 0.013219  
63072, 34320, 5.2279, 0.013065  
63073, 34390, 5.1660, 0.012910  
63074, 34106, 5.1040, 0.012755  
63075, 33524, 5.0421, 0.012600  
63076, 32748, 4.9802, 0.012446  
63077, 31926, 4.9183, 0.012291  
63078, 31226, 4.8563, 0.012136  
63079, 30768, 4.7944, 0.011981  
63080, 30558, 4.7325, 0.011827  
63081, 30486, 4.6706, 0.011672  
63082, 30432, 4.6086, 0.011517  
63083, 30370, 4.5467, 0.011362  
63084, 30394, 4.4848, 0.011208  
63085, 30578, 4.4228, 0.011053  
63086, 30876, 4.3609, 0.010898  
63087, 31164, 4.2990, 0.010743  
63088, 31350, 4.2371, 0.010589  
63089, 31440, 4.1751, 0.010434  
63090, 31488, 4.1132, 0.010279  
63091, 31514, 4.0513, 0.010124  
63092, 31504, 3.9894, 0.009970  
63093, 31502, 3.9274, 0.009815  
63094, 31638, 3.8655, 0.009660  
63095, 32000, 3.8036, 0.009505  
63096, 32484, 3.7417, 0.009351  
63097, 32790, 3.6797, 0.009196  
63098, 32670, 3.6178, 0.009041  
63099, 32144, 3.5559, 0.008886  
63100, 31544, 3.4939, 0.008732  
63101, 31228, 3.4320, 0.008577  
63102, 31304, 3.3701, 0.008422  
63103, 31602, 3.3082, 0.008267  
63104, 31866, 3.2462, 0.008112  
63105, 31956, 3.1843, 0.007958  
63106, 31856, 3.1224, 0.007803  
63107, 31554, 3.0605, 0.007648  
63108, 31004, 2.9985, 0.007493  
63109, 30264, 2.9366, 0.007339  
63110, 29644, 2.8747, 0.007184  
63111, 29576, 2.8127, 0.007029  
63112, 30312, 2.7508, 0.006874  
63113, 31650, 2.6889, 0.006720  
63114, 33030, 2.6270, 0.006565

|                                  |                                  |                                   |
|----------------------------------|----------------------------------|-----------------------------------|
| 63115, 33886, 2.5650, 0.006410   | 63191, 34156, -2.1414, -0.005351 | 63267, 34818, -6.8478, -0.017113  |
| 63116, 34012, 2.5031, 0.006255   | 63192, 34176, -2.2033, -0.005506 | 63268, 34528, -6.9098, -0.017268  |
| 63117, 33610, 2.4412, 0.006101   | 63193, 33902, -2.2653, -0.005661 | 63269, 34698, -6.9717, -0.017423  |
| 63118, 33084, 2.3793, 0.005946   | 63194, 33460, -2.3272, -0.005816 | 63270, 35300, -7.0336, -0.017577  |
| 63119, 32756, 2.3173, 0.005791   | 63195, 33036, -2.3891, -0.005970 | 63271, 36082, -7.0956, -0.017732  |
| 63120, 32760, 2.2554, 0.005636   | 63196, 32826, -2.4510, -0.006125 | 63272, 36744, -7.1575, -0.017887  |
| 63121, 33058, 2.1935, 0.005482   | 63197, 32972, -2.5130, -0.006280 | 63273, 37152, -7.2194, -0.018042  |
| 63122, 33482, 2.1316, 0.005327   | 63198, 33430, -2.5749, -0.006435 | 63274, 37324, -7.2813, -0.018196  |
| 63123, 33800, 2.0696, 0.005172   | 63199, 33928, -2.6368, -0.006590 | 63275, 37306, -7.3433, -0.018351  |
| 63124, 33820, 2.0077, 0.005017   | 63200, 34094, -2.6987, -0.006744 | 63276, 37054, -7.4052, -0.018506  |
| 63125, 33574, 1.9458, 0.004863   | 63201, 33732, -2.7607, -0.006899 | 63277, 36520, -7.4671, -0.018661  |
| 63126, 33330, 1.8838, 0.004708   | 63202, 33010, -2.8226, -0.007054 | 63278, 35786, -7.5290, -0.018815  |
| 63127, 33434, 1.8219, 0.004553   | 63203, 32318, -2.8845, -0.007209 | 63279, 35082, -7.5910, -0.018970  |
| 63128, 33976, 1.7600, 0.004398   | 63204, 31940, -2.9465, -0.007363 | 63280, 34612, -7.6529, -0.019125  |
| 63129, 34664, 1.6981, 0.004244   | 63205, 31856, -3.0084, -0.007518 | 63281, 34380, -7.7148, -0.019280  |
| 63130, 35046, 1.6361, 0.004089   | 63206, 31242, -3.0703, -0.007673 | 63282, 34210, -7.7768, -0.019434  |
| 63131, 34902, 1.5742, 0.003934   | 63207, 31726, -3.1322, -0.007828 | 63283, 33928, -7.8387, -0.019589  |
| 63132, 34432, 1.5123, 0.003779   | 63208, 31556, -3.1942, -0.007982 | 63284, 33500, -7.9006, -0.019744  |
| 63133, 34078, 1.4504, 0.003624   | 63209, 31440, -3.2561, -0.008137 | 63285, 33046, -7.9625, -0.019899  |
| 63134, 34102, 1.3884, 0.003470   | 63210, 31358, -3.3180, -0.008292 | 63286, 32696, -8.0245, -0.020053  |
| 63135, 34390, 1.3265, 0.003315   | 63211, 31170, -3.3799, -0.008447 | 63287, 32512, -8.0864, -0.020208  |
| 63136, 34644, 1.2646, 0.003160   | 63212, 30834, -3.4419, -0.008601 | 63288, 32528, -8.1483, -0.020363  |
| 63137, 34694, 1.2027, 0.003005   | 63213, 30570, -3.5038, -0.008756 | 63289, 32800, -8.2102, -0.020518  |
| 63138, 34648, 1.1407, 0.002851   | 63214, 30666, -3.5657, -0.008911 | 63290, 33344, -8.2722, -0.020672  |
| 63139, 34698, 1.0788, 0.002696   | 63215, 31176, -3.6276, -0.009066 | 63291, 34044, -8.3341, -0.020827  |
| 63140, 34898, 1.0169, 0.002541   | 63216, 31754, -3.6896, -0.009220 | 63292, 34632, -8.3960, -0.020982  |
| 63141, 35124, 0.9549, 0.002386   | 63217, 31948, -3.7515, -0.009375 | 63293, 34836, -8.4579, -0.021137  |
| 63142, 35246, 0.8930, 0.002232   | 63218, 31648, -3.8134, -0.009530 | 63294, 34532, -8.5199, -0.021291  |
| 63143, 35254, 0.8311, 0.002077   | 63219, 31242, -3.8754, -0.009685 | 63295, 33840, -8.5818, -0.021446  |
| 63144, 35194, 0.7692, 0.001922   | 63220, 31282, -3.9373, -0.009839 | 63296, 32998, -8.6437, -0.021601  |
| 63145, 35014, 0.7072, 0.001767   | 63221, 32014, -3.9992, -0.009994 | 63297, 32258, -8.7057, -0.021756  |
| 63146, 34572, 0.6453, 0.001613   | 63222, 33180, -4.0611, -0.010149 | 63298, 31788, -8.7676, -0.021911  |
| 63147, 33840, 0.5834, 0.001458   | 63223, 34288, -4.1231, -0.010304 | 63299, 31686, -8.8295, -0.022065  |
| 63148, 33040, 0.5215, 0.001303   | 63224, 35012, -4.1850, -0.010458 | 63300, 31870, -8.8914, -0.022220  |
| 63149, 32518, 0.4595, 0.001148   | 63225, 35376, -4.2469, -0.010613 | 63301, 32068, -8.9534, -0.022375  |
| 63150, 32470, 0.3976, 0.000994   | 63226, 35532, -4.3088, -0.010768 | 63302, 31888, -9.0153, -0.022530  |
| 63151, 32728, 0.3357, 0.000839   | 63227, 35544, -4.3708, -0.010923 | 63303, 31096, -9.0772, -0.022684  |
| 63152, 32952, 0.2737, 0.000684   | 63228, 35364, -4.4327, -0.011077 | 63304, 29884, -9.1391, -0.022839  |
| 63153, 32946, 0.2118, 0.000529   | 63229, 34998, -4.4946, -0.011232 | 63305, 28800, -9.2011, -0.022994  |
| 63154, 32780, 0.1499, 0.000375   | 63230, 34640, -4.5566, -0.011387 | 63306, 28364, -9.2630, -0.023149  |
| 63155, 32622, 0.0880, 0.000220   | 63231, 34500, -4.6185, -0.011542 | 63307, 28648, -9.3249, -0.023303  |
| 63156, 32488, 0.0260, 0.000065   | 63232, 34620, -4.6804, -0.011697 | 63308, 29256, -9.3869, -0.023458  |
| 63157, 32222, -0.0359, -0.000090 | 63233, 34804, -4.7423, -0.011851 | 63309, 29716, -9.4488, -0.023613  |
| 63158, 31766, -0.0978, -0.000244 | 63234, 34814, -4.8043, -0.012006 | 63310, 29906, -9.5107, -0.023768  |
| 63159, 31330, -0.1597, -0.000399 | 63235, 34552, -4.8662, -0.012161 | 63311, 30082, -9.5726, -0.023922  |
| 63160, 31258, -0.2217, -0.000554 | 63236, 34094, -4.9281, -0.012316 | 63312, 30512, -9.6346, -0.024077  |
| 63161, 31656, -0.2836, -0.000709 | 63237, 33574, -4.9900, -0.012470 | 63313, 31126, -9.6965, -0.024232  |
| 63162, 32220, -0.3455, -0.000863 | 63238, 33088, -5.0520, -0.012625 | 63314, 31576, -9.7584, -0.024387  |
| 63163, 32486, -0.4074, -0.001018 | 63239, 32734, -5.1139, -0.012780 | 63315, 31628, -9.8203, -0.024541  |
| 63164, 32254, -0.4694, -0.001173 | 63240, 32674, -5.1758, -0.012935 | 63316, 31426, -9.8823, -0.024696  |
| 63165, 31748, -0.5313, -0.001328 | 63241, 33024, -5.2377, -0.013089 | 63317, 31370, -9.9442, -0.024851  |
| 63166, 31390, -0.5932, -0.001483 | 63242, 33656, -5.2997, -0.013244 | 63318, 31698, -10.0061, -0.025006 |
| 63167, 31390, -0.6552, -0.001637 | 63243, 34198, -5.3616, -0.013399 | 63319, 32280, -10.0680, -0.025160 |
| 63168, 31626, -0.7171, -0.001792 | 63244, 34272, -5.4235, -0.013554 | 63320, 32824, -10.1300, -0.025315 |
| 63169, 31892, -0.7790, -0.001947 | 63245, 33790, -5.4855, -0.013708 | 63321, 33196, -10.1919, -0.025470 |
| 63170, 32154, -0.8409, -0.002102 | 63246, 33064, -5.5474, -0.013863 | 63322, 33532, -10.2538, -0.025625 |
| 63171, 32564, -0.9029, -0.002256 | 63247, 32480, -5.6093, -0.014018 | 63323, 34002, -10.3158, -0.025779 |
| 63172, 33202, -0.9648, -0.002411 | 63248, 32188, -5.6712, -0.014173 | 63324, 34568, -10.3777, -0.025934 |
| 63173, 33880, -1.0267, -0.002566 | 63249, 32042, -5.7332, -0.014327 | 63325, 35002, -10.4396, -0.026089 |
| 63174, 34288, -1.0886, -0.002721 | 63250, 31876, -5.7951, -0.014482 | 63326, 35192, -10.5015, -0.026244 |
| 63175, 34290, -1.1506, -0.002875 | 63251, 31778, -5.8570, -0.014637 | 63327, 35248, -10.5635, -0.026398 |
| 63176, 34066, -1.2125, -0.003030 | 63252, 31996, -5.9189, -0.014792 | 63328, 35374, -10.6254, -0.026553 |
| 63177, 33910, -1.2744, -0.003185 | 63253, 32604, -5.9809, -0.014946 | 63329, 35566, -10.6873, -0.026708 |
| 63178, 33940, -1.3364, -0.003340 | 63254, 33312, -6.0428, -0.015101 | 63330, 35592, -10.7492, -0.026863 |
| 63179, 34022, -1.3983, -0.003494 | 63255, 33706, -6.1047, -0.015256 | 63331, 35278, -10.8112, -0.027018 |
| 63180, 33974, -1.4602, -0.003649 | 63256, 33662, -6.1667, -0.015411 | 63332, 34764, -10.8731, -0.027172 |
| 63181, 33790, -1.5221, -0.003804 | 63257, 33534, -6.2286, -0.015565 | 63333, 34438, -10.9350, -0.027327 |
| 63182, 33644, -1.5841, -0.003959 | 63258, 33844, -6.2905, -0.015720 | 63334, 34532, -10.9969, -0.027482 |
| 63183, 33636, -1.6460, -0.004113 | 63259, 34798, -6.3524, -0.015875 | 63335, 34910, -11.0589, -0.027637 |
| 63184, 33686, -1.7079, -0.004268 | 63260, 36086, -6.4144, -0.016030 | 63336, 35198, -11.1208, -0.027791 |
| 63185, 33610, -1.7698, -0.004423 | 63261, 37122, -6.4763, -0.016184 | 63337, 35178, -11.1827, -0.027946 |
| 63186, 33358, -1.8318, -0.004578 | 63262, 37524, -6.5382, -0.016339 | 63338, 34970, -11.2447, -0.028101 |
| 63187, 33106, -1.8937, -0.004732 | 63263, 37316, -6.6001, -0.016494 | 63339, 34800, -11.3066, -0.028256 |
| 63188, 33096, -1.9556, -0.004887 | 63264, 36758, -6.6621, -0.016649 | 63340, 34682, -11.3685, -0.028410 |
| 63189, 33400, -2.0175, -0.005042 | 63265, 36082, -6.7240, -0.016804 | 63341, 34400, -11.4304, -0.028565 |
| 63190, 33840, -2.0795, -0.005197 | 63266, 35400, -6.7859, -0.016958 | 63342, 33844, -11.4924, -0.028720 |

63343, 33216, -11.5543, -0.028875  
63344, 32896, -11.6162, -0.029029  
63345, 32996, -11.6781, -0.029184  
63346, 33172, -11.7401, -0.029339  
63347, 32962, -11.8020, -0.029494  
63348, 32310, -11.8639, -0.029648  
63349, 31668, -11.9259, -0.029803  
63350, 31568, -11.9878, -0.029958  
63351, 32064, -12.0497, -0.030113  
63352, 32638, -12.1116, -0.030267  
63353, 32734, -12.1736, -0.030422  
63354, 32338, -12.2355, -0.030577  
63355, 32018, -12.2974, -0.030732  
63356, 32376, -12.3593, -0.030886  
63357, 33470, -12.4213, -0.031041  
63358, 34770, -12.4832, -0.031196  
63359, 35620, -12.5451, -0.031351  
63360, 35752, -12.6070, -0.031505  
63361, 35352, -12.6690, -0.031660  
63362, 34814, -12.7309, -0.031815  
63363, 34434, -12.7928, -0.031970  
63364, 34352, -12.8548, -0.032125  
63365, 34568, -12.9167, -0.032279  
63366, 34996, -12.9786, -0.032434  
63367, 35430, -13.0405, -0.032589  
63368, 35644, -13.1025, -0.032744  
63369, 35554, -13.1644, -0.032898  
63370, 35332, -13.2263, -0.033053  
63371, 35222, -13.2882, -0.033208  
63372, 35254, -13.3502, -0.033363  
63373, 35174, -13.4121, -0.033517  
63374, 34730, -13.4740, -0.033672  
63375, 34024, -13.5360, -0.033827  
63376, 33502, -13.5979, -0.033982  
63377, 33554, -13.6598, -0.034136  
63378, 34054, -13.7217, -0.034291  
63379, 34464, -13.7837, -0.034446  
63380, 34340, -13.8456, -0.034601  
63381, 33810, -13.9075, -0.034755  
63382, 33440, -13.9694, -0.034910  
63383, 33646, -14.0314, -0.035065  
63384, 34270, -14.0933, -0.035220  
63385, 34768, -14.1552, -0.035374  
63386, 34794, -14.2171, -0.035529  
63387, 34552, -14.2791, -0.035684  
63388, 34528, -14.3410, -0.035839  
63389, 34944, -14.4029, -0.035993  
63390, 35538, -14.4649, -0.036148  
63391, 35862, -14.5268, -0.036303  
63392, 35810, -14.5887, -0.036458  
63393, 35710, -14.6506, -0.036612  
63394, 35932, -14.7126, -0.036767  
63395, 36484, -14.7745, -0.036922  
63396, 37010, -14.8364, -0.037077  
63397, 37176, -14.8983, -0.037232  
63398, 36990, -14.9603, -0.037386  
63399, 36712, -15.0222, -0.037541  
63400, 36514, -15.0841, -0.037696  
63401, 36316, -15.1461, -0.037851  
63402, 35954, -15.2080, -0.038005  
63403, 35464, -15.2699, -0.038160  
63404, 35086, -15.3318, -0.038315  
63405, 34958, -15.3938, -0.038470  
63406, 34942, -15.4557, -0.038624  
63407, 34766, -15.5176, -0.038779  
63408, 34362, -15.5795, -0.038934  
63409, 34036, -15.6415, -0.039089  
63410, 34200, -15.7034, -0.039243  
63411, 34942, -15.7653, -0.039398  
63412, 35888, -15.8272, -0.039553  
63413, 36448, -15.8892, -0.039708  
63414, 36264, -15.9511, -0.039862  
63415, 35410, -16.0130, -0.040017  
63416, 34226, -16.0750, -0.040172  
63417, 33074, -16.1369, -0.040327  
63418, 32186, -16.1988, -0.040481  
63419, 31700, -16.2607, -0.040636  
63420, 31662, -16.3227, -0.040791  
63421, 31984, -16.3846, -0.040946  
63422, 32412, -16.4465, -0.041100  
63423, 32666, -16.5084, -0.041255  
63424, 32656, -16.5704, -0.041410  
63425, 32554, -16.6323, -0.041565  
63426, 32622, -16.6942, -0.041720  
63427, 32938, -16.7562, -0.041874  
63428, 33322, -16.8181, -0.042029  
63429, 33512, -16.8800, -0.042184  
63430, 33430, -16.9419, -0.042339  
63431, 33210, -17.0039, -0.042493  
63432, 33058, -17.0658, -0.042648  
63433, 33080, -17.1277, -0.042803  
63434, 33260, -17.1896, -0.042958  
63435, 33570, -17.2516, -0.043112  
63436, 34010, -17.3135, -0.043267  
63437, 34534, -17.3754, -0.043422  
63438, 35000, -17.4373, -0.043577  
63439, 35258, -17.4993, -0.043731  
63440, 35258, -17.5612, -0.043886  
63441, 35114, -17.6231, -0.044041  
63442, 34946, -17.6851, -0.044196  
63443, 34740, -17.7470, -0.044350  
63444, 34388, -17.8089, -0.044505  
63445, 33904, -17.8708, -0.044660  
63446, 33530, -17.9328, -0.044815  
63447, 33536, -17.9947, -0.044969  
63448, 33904, -18.0566, -0.045124  
63449, 34256, -18.1185, -0.045279  
63450, 34130, -18.1805, -0.045434  
63451, 33456, -18.2424, -0.045588  
63452, 32634, -18.3043, -0.045743  
63453, 32180, -18.3663, -0.045898  
63454, 32274, -18.4282, -0.046053  
63455, 32654, -18.4901, -0.046207  
63456, 32924, -18.5520, -0.046362  
63457, 32994, -18.6140, -0.046517  
63458, 33056, -18.6759, -0.046672  
63459, 33280, -18.7378, -0.046827  
63460, 33542, -18.7997, -0.046981  
63461, 33534, -18.8617, -0.047136  
63462, 33142, -18.9236, -0.047291  
63463, 32632, -18.9855, -0.047446  
63464, 32432, -19.0474, -0.047600  
63465, 32744, -19.1094, -0.047755  
63466, 33366, -19.1713, -0.047910  
63467, 33950, -19.2332, -0.048065  
63468, 34320, -19.2952, -0.048219  
63469, 34556, -19.3571, -0.048374  
63470, 34794, -19.4190, -0.048529  
63471, 34980, -19.4809, -0.048684  
63472, 34954, -19.5429, -0.048838  
63473, 34692, -19.6048, -0.048993  
63474, 34402, -19.6667, -0.049148  
63475, 34340, -19.7286, -0.049303  
63476, 34518, -19.7906, -0.049457  
63477, 34664, -19.8525, -0.049612  
63478, 34500, -19.9144, -0.049767  
63479, 34030, -19.9764, -0.049922  
63480, 33532, -20.0383, -0.050076  
63481, 33252, -20.1002, -0.050231  
63482, 33178, -20.1621, -0.050386  
63483, 33118, -20.2241, -0.050541  
63484, 32992, -20.2860, -0.050695  
63485, 32984, -20.3479, -0.050850  
63486, 33364, -20.4098, -0.051005  
63487, 34154, -20.4718, -0.051160  
63488, 35072, -20.5337, -0.051314  
63489, 35740, -20.5956, -0.051469  
63490, 36044, -20.6575, -0.051624  
63491, 36176, -20.7195, -0.051779  
63492, 36364, -20.7814, -0.051934  
63493, 36598, -20.8433, -0.052088  
63494, 36638, -20.9053, -0.052243  
63495, 36276, -20.9672, -0.052398  
63496, 35590, -21.0291, -0.052553  
63497, 34922, -21.0910, -0.052707  
63498, 34574, -21.1530, -0.052862  
63499, 34558, -21.2149, -0.053017  
63500, 34608, -21.2768, -0.053172  
63501, 34428, -21.3387, -0.053326  
63502, 33962, -21.4007, -0.053481  
63503, 33392, -21.4626, -0.053636  
63504, 32976, -21.5245, -0.053791  
63505, 32820, -21.5865, -0.053945  
63506, 32802, -21.6484, -0.054100  
63507, 32712, -21.7103, -0.054255  
63508, 32406, -21.7722, -0.054410  
63509, 31964, -21.8342, -0.054564  
63510, 31638, -21.8961, -0.054719  
63511, 31676, -21.9580, -0.054874  
63512, 32154, -22.0199, -0.055029  
63513, 32928, -22.0819, -0.055183  
63514, 33706, -22.1438, -0.055338  
63515, 34242, -22.2057, -0.055493  
63516, 34448, -22.2676, -0.055648  
63517, 34344, -22.3296, -0.055802  
63518, 33994, -22.3915, -0.055957  
63519, 33424, -22.4534, -0.056112  
63520, 32682, -22.5154, -0.056267  
63521, 31900, -22.5773, -0.056421  
63522, 31278, -22.6392, -0.056576  
63523, 30974, -22.7011, -0.056731  
63524, 31012, -22.7631, -0.056886  
63525, 31286, -22.8250, -0.057041  
63526, 31688, -22.8869, -0.057195  
63527, 32174, -22.9488, -0.057350  
63528, 32746, -23.0108, -0.057505  
63529, 33364, -23.0727, -0.057660  
63530, 33902, -23.1346, -0.057814  
63531, 34232, -23.1966, -0.057969  
63532, 34276, -23.2585, -0.058124  
63533, 34076, -23.3204, -0.058279  
63534, 33714, -23.3823, -0.058433  
63535, 33294, -23.4443, -0.058588  
63536, 32934, -23.5062, -0.058743  
63537, 32804, -23.5681, -0.058898  
63538, 33012, -23.6300, -0.059052  
63539, 33502, -23.6920, -0.059207  
63540, 34032, -23.7539, -0.059362  
63541, 34316, -23.8158, -0.059517  
63542, 34242, -23.8777, -0.059671  
63543, 33942, -23.9397, -0.059826  
63544, 33654, -24.0016, -0.059981  
63545, 33544, -24.0635, -0.060136  
63546, 33632, -24.1255, -0.060290  
63547, 33880, -24.1874, -0.060445  
63548, 34272, -24.2493, -0.060600  
63549, 34784, -24.3112, -0.060755  
63550, 35272, -24.3732, -0.060909  
63551, 35510, -24.4351, -0.061064  
63552, 35386, -24.4970, -0.061219  
63553, 35078, -24.5589, -0.061374  
63554, 34930, -24.6209, -0.061528  
63555, 35096, -24.6828, -0.061683  
63556, 35332, -24.7447, -0.061838  
63557, 35174, -24.8066, -0.061993  
63558, 34410, -24.8686, -0.062148  
63559, 33380, -24.9305, -0.062302  
63560, 32710, -24.9924, -0.062457  
63561, 32756, -25.0544, -0.062612  
63562, 33252, -25.1163, -0.062767  
63563, 33608, -25.1782, -0.062921  
63564, 33502, -25.2401, -0.063076  
63565, 33188, -25.3021, -0.063231  
63566, 33218, -25.3640, -0.063386  
63567, 33868, -25.4259, -0.063540  
63568, 34874, -25.4878, -0.063695  
63569, 35722, -25.5498, -0.063850  
63570, 36130, -25.6117, -0.064005

63571, 36232, -25.6736, -0.064159  
63572, 36304, -25.7356, -0.064314  
63573, 36416, -25.7975, -0.064469  
63574, 36396, -25.8594, -0.064624  
63575, 36094, -25.9213, -0.064778  
63576, 35624, -25.9833, -0.064933  
63577, 35234, -26.0452, -0.065088  
63578, 35018, -26.1071, -0.065243  
63579, 34788, -26.1690, -0.065397  
63580, 34334, -26.2310, -0.065552  
63581, 33704, -26.2929, -0.065707  
63582, 33216, -26.3548, -0.065862  
63583, 33164, -26.4167, -0.066016  
63584, 33506, -26.4787, -0.066171  
63585, 33934, -26.5406, -0.066326  
63586, 34158, -26.6025, -0.066481  
63587, 34152, -26.6645, -0.066635  
63588, 34076, -26.7264, -0.066790  
63589, 34010, -26.7883, -0.066945  
63590, 33904, -26.8502, -0.067100  
63591, 33708, -26.9122, -0.067255  
63592, 33524, -26.9741, -0.067409  
63593, 33572, -27.0360, -0.067564  
63594, 33952, -27.0979, -0.067719  
63595, 34544, -27.1599, -0.067874  
63596, 35144, -27.2218, -0.068028  
63597, 35700, -27.2837, -0.068183  
63598, 36318, -27.3457, -0.068338  
63599, 37056, -27.4076, -0.068493  
63600, 37746, -27.4695, -0.068647  
63601, 38096, -27.5314, -0.068802  
63602, 37974, -27.5934, -0.068957  
63603, 37550, -27.6553, -0.069112  
63604, 37098, -27.7172, -0.069266  
63605, 36734, -27.7791, -0.069421  
63606, 36344, -27.8411, -0.069576  
63607, 35832, -27.9030, -0.069731  
63608, 35346, -27.9649, -0.069885  
63609, 35158, -28.0268, -0.070040  
63610, 35350, -28.0888, -0.070195  
63611, 35640, -28.1507, -0.070350  
63612, 35664, -28.2126, -0.070504  
63613, 35380, -28.2746, -0.070659  
63614, 35154, -28.3365, -0.070814  
63615, 35356, -28.3984, -0.070969  
63616, 35906, -28.4603, -0.071123  
63617, 36346, -28.5223, -0.071278  
63618, 36320, -28.5842, -0.071433  
63619, 36038, -28.6461, -0.071588  
63620, 36066, -28.7080, -0.071742  
63621, 36718, -28.7700, -0.071897  
63622, 37610, -28.8319, -0.072052  
63623, 37986, -28.8938, -0.072207  
63624, 37448, -28.9558, -0.072362  
63625, 36384, -29.0177, -0.072516  
63626, 35618, -29.0796, -0.072671  
63627, 35602, -29.1415, -0.072826  
63628, 36028, -29.2035, -0.072981  
63629, 36178, -29.2654, -0.073135  
63630, 35630, -29.3273, -0.073290  
63631, 34632, -29.3892, -0.073445  
63632, 33748, -29.4512, -0.073600  
63633, 33360, -29.5131, -0.073754  
63634, 33418, -29.5750, -0.073909  
63635, 33672, -29.6369, -0.074064  
63636, 34004, -29.6988, -0.074219  
63637, 34460, -29.7608, -0.074373  
63638, 34988, -29.8227, -0.074528  
63639, 35316, -29.8847, -0.074683  
63640, 35194, -29.9466, -0.074838  
63641, 34676, -30.0085, -0.074992  
63642, 34164, -30.0704, -0.075147  
63643, 34078, -30.1324, -0.075302  
63644, 34492, -30.1943, -0.075457  
63645, 35130, -30.2562, -0.075611  
63646, 35624, -30.3181, -0.075766  
63647, 35832, -30.3801, -0.075921  
63648, 35790, -30.4420, -0.076076  
63649, 35544, -30.5039, -0.076230  
63650, 35076, -30.5659, -0.076385  
63651, 34430, -30.6278, -0.076540  
63652, 33872, -30.6897, -0.076695  
63653, 33758, -30.7516, -0.076849  
63654, 34226, -30.8136, -0.077004  
63655, 35048, -30.8755, -0.077159  
63656, 35760, -30.9374, -0.077314  
63657, 36050, -30.9993, -0.077469  
63658, 35978, -31.0613, -0.077623  
63659, 35828, -31.1232, -0.077778  
63660, 35792, -31.1851, -0.077933  
63661, 35832, -31.2470, -0.078088  
63662, 35800, -31.3090, -0.078242  
63663, 35628, -31.3709, -0.078397  
63664, 35408, -31.4328, -0.078552  
63665, 35280, -31.4948, -0.078707  
63666, 35290, -31.5567, -0.078861  
63667, 35388, -31.6186, -0.079016  
63668, 35512, -31.6805, -0.079171  
63669, 35586, -31.7425, -0.079326  
63670, 35504, -31.8044, -0.079480  
63671, 35158, -31.8663, -0.079635  
63672, 34532, -31.9282, -0.079790  
63673, 33794, -31.9902, -0.079945  
63674, 33224, -32.0521, -0.080099  
63675, 32950, -32.1140, -0.080254  
63676, 32840, -32.1760, -0.080409  
63677, 32620, -32.2379, -0.080564  
63678, 32138, -32.2998, -0.080718  
63679, 31534, -32.3617, -0.080873  
63680, 31046, -32.4237, -0.081028  
63681, 30744, -32.4856, -0.081183  
63682, 30492, -32.5475, -0.081337  
63683, 30134, -32.6094, -0.081492  
63684, 29770, -32.6714, -0.081647  
63685, 29708, -32.7333, -0.081802  
63686, 30146, -32.7952, -0.081956  
63687, 30948, -32.8571, -0.082111  
63688, 31714, -32.9191, -0.082266  
63689, 32160, -32.9810, -0.082421  
63690, 32326, -33.0429, -0.082576  
63691, 32454, -33.1049, -0.082730  
63692, 32680, -33.1668, -0.082885  
63693, 32884, -33.2287, -0.083040  
63694, 32918, -33.2906, -0.083195  
63695, 32808, -33.3526, -0.083349  
63696, 32822, -33.4145, -0.083504  
63697, 33190, -33.4764, -0.083659  
63698, 33854, -33.5383, -0.083814  
63699, 34530, -33.6003, -0.083968  
63700, 34950, -33.6622, -0.084123  
63701, 35046, -33.7241, -0.084278  
63702, 34886, -33.7861, -0.084433  
63703, 34508, -33.8480, -0.084587  
63704, 33900, -33.9099, -0.084742  
63705, 33160, -33.9718, -0.084897  
63706, 32602, -34.0338, -0.085052  
63707, 32536, -34.0957, -0.085206  
63708, 32996, -34.1576, -0.085361  
63709, 33596, -34.2195, -0.085516  
63710, 33854, -34.2815, -0.085671  
63711, 33578, -34.3434, -0.085825  
63712, 33000, -34.4053, -0.085980  
63713, 32498, -34.4672, -0.086135  
63714, 32214, -34.5292, -0.086290  
63715, 31964, -34.5911, -0.086444  
63716, 31542, -34.6530, -0.086599  
63717, 31016, -34.7150, -0.086754  
63718, 30674, -34.7769, -0.086909  
63719, 30738, -34.8388, -0.087064  
63720, 31090, -34.9007, -0.087218  
63721, 31388, -34.9627, -0.087373  
63722, 31420, -35.0246, -0.087528  
63723, 31252, -35.0865, -0.087683  
63724, 31116, -35.1484, -0.087837  
63725, 31126, -35.2104, -0.087992  
63726, 31160, -35.2723, -0.088147  
63727, 31064, -35.3342, -0.088302  
63728, 30864, -35.3962, -0.088456  
63729, 30770, -35.4581, -0.088611  
63730, 31002, -35.5200, -0.088766  
63731, 31564, -35.5819, -0.088921  
63732, 32290, -35.6439, -0.089075  
63733, 33008, -35.7058, -0.089230  
63734, 33640, -35.7677, -0.089385  
63735, 34188, -35.8296, -0.089540  
63736, 34618, -35.8916, -0.089694  
63737, 34840, -35.9535, -0.089849  
63738, 34806, -36.0154, -0.090004  
63739, 34538, -36.0773, -0.090159  
63740, 34118, -36.1393, -0.090313  
63741, 33590, -36.2012, -0.090468  
63742, 32998, -36.2631, -0.090623  
63743, 32452, -36.3251, -0.090778  
63744, 32136, -36.3870, -0.090932  
63745, 32204, -36.4489, -0.091087  
63746, 32640, -36.5108, -0.091242  
63747, 33234, -36.5728, -0.091397  
63748, 33786, -36.6347, -0.091551  
63749, 34216, -36.6966, -0.091706  
63750, 34572, -36.7585, -0.091861  
63751, 34860, -36.8205, -0.092016  
63752, 34942, -36.8824, -0.092171  
63753, 34680, -36.9443, -0.092325  
63754, 34090, -37.0063, -0.092480  
63755, 33414, -37.0682, -0.092635  
63756, 32884, -37.1301, -0.092790  
63757, 32548, -37.1920, -0.092944  
63758, 32244, -37.2540, -0.093099  
63759, 31840, -37.3159, -0.093254  
63760, 31430, -37.3778, -0.093409  
63761, 31242, -37.4397, -0.093563  
63762, 31392, -37.5017, -0.093718  
63763, 31756, -37.5636, -0.093873  
63764, 32096, -37.6255, -0.094028  
63765, 32366, -37.6874, -0.094182  
63766, 32732, -37.7494, -0.094337  
63767, 33388, -37.8113, -0.094492  
63768, 34262, -37.8732, -0.094647  
63769, 35034, -37.9352, -0.094801  
63770, 35396, -37.9971, -0.094956  
63771, 35326, -38.0590, -0.095111  
63772, 35076, -38.1209, -0.095266  
63773, 34876, -38.1829, -0.095420  
63774, 34742, -38.2448, -0.095575  
63775, 34516, -38.3067, -0.095730  
63776, 34076, -38.3686, -0.095885  
63777, 33494, -38.4306, -0.096039  
63778, 32936, -38.4925, -0.096194  
63779, 32482, -38.5544, -0.096349  
63780, 32108, -38.6163, -0.096504  
63781, 31752, -38.6783, -0.096658  
63782, 31442, -38.7402, -0.096813  
63783, 31280, -38.8021, -0.096968  
63784, 31326, -38.8641, -0.097123  
63785, 31578, -38.9260, -0.097278  
63786, 31982, -38.9879, -0.097432  
63787, 32482, -39.0498, -0.097587  
63788, 32936, -39.1118, -0.097742  
63789, 33100, -39.1737, -0.097897  
63790, 32746, -39.2356, -0.098051  
63791, 31912, -39.2975, -0.098206  
63792, 30994, -39.3595, -0.098361  
63793, 30552, -39.4214, -0.098516  
63794, 30828, -39.4833, -0.098670  
63795, 31532, -39.5453, -0.098825  
63796, 32080, -39.6072, -0.098980  
63797, 32090, -39.6691, -0.099135  
63798, 31706, -39.7310, -0.099289

63799, 31386, -39.7930, -0.099444  
63800, 31410, -39.8549, -0.099599  
63801, 31660, -39.9168, -0.099754  
63802, 31792, -39.9787, -0.099908  
63803, 31658, -40.0407, -0.100063  
63804, 31476, -40.1026, -0.100218  
63805, 31520, -40.1645, -0.100373  
63806, 31808, -40.2264, -0.100527  
63807, 32064, -40.2884, -0.100682  
63808, 32062, -40.3503, -0.100837  
63809, 31916, -40.4122, -0.100992  
63810, 31982, -40.4742, -0.101146  
63811, 32462, -40.5361, -0.101301  
63812, 33164, -40.5980, -0.101456  
63813, 33648, -40.6599, -0.101611  
63814, 33676, -40.7219, -0.101765  
63815, 33400, -40.7838, -0.101920  
63816, 33204, -40.8457, -0.102075  
63817, 33308, -40.9076, -0.102230  
63818, 33610, -40.9696, -0.102385  
63819, 33858, -41.0315, -0.102539  
63820, 33948, -41.0934, -0.102694  
63821, 34010, -41.1554, -0.102849  
63822, 34208, -41.2173, -0.103004  
63823, 34512, -41.2792, -0.103158  
63824, 34710, -41.3411, -0.103313  
63825, 34590, -41.4031, -0.103468  
63826, 34154, -41.4650, -0.103623  
63827, 33592, -41.5269, -0.103777  
63828, 33182, -41.5888, -0.103932  
63829, 33112, -41.6508, -0.104087  
63830, 33434, -41.7127, -0.104242  
63831, 34010, -41.7746, -0.104396  
63832, 34510, -41.8365, -0.104551  
63833, 34548, -41.8985, -0.104706  
63834, 33882, -41.9604, -0.104861  
63835, 32668, -42.0223, -0.105015  
63836, 31424, -42.0843, -0.105170  
63837, 30742, -42.1462, -0.105325  
63838, 30904, -42.2081, -0.105480  
63839, 31730, -42.2700, -0.105634  
63840, 32756, -42.3320, -0.105789  
63841, 33592, -42.3939, -0.105944  
63842, 34124, -42.4558, -0.106099  
63843, 34430, -42.5177, -0.106253  
63844, 34636, -42.5797, -0.106408  
63845, 34804, -42.6416, -0.106563  
63846, 35008, -42.7035, -0.106718  
63847, 35308, -42.7655, -0.106872  
63848, 35718, -42.8274, -0.107027  
63849, 36130, -42.8893, -0.107182  
63850, 36380, -42.9512, -0.107337  
63851, 36400, -43.0132, -0.107492  
63852, 36278, -43.0751, -0.107646  
63853, 36134, -43.1370, -0.107801  
63854, 35980, -43.1989, -0.107956  
63855, 35662, -43.2609, -0.108111  
63856, 35108, -43.3228, -0.108265  
63857, 34492, -43.3847, -0.108420  
63858, 34110, -43.4466, -0.108575  
63859, 34102, -43.5086, -0.108730  
63860, 34240, -43.5705, -0.108884  
63861, 34122, -43.6324, -0.109039  
63862, 33608, -43.6944, -0.109194  
63863, 33018, -43.7563, -0.109349  
63864, 32866, -43.8182, -0.109503  
63865, 33366, -43.8801, -0.109658  
63866, 34180, -43.9421, -0.109813  
63867, 34712, -44.0040, -0.109968  
63868, 34634, -44.0659, -0.110122  
63869, 34126, -44.1278, -0.110277  
63870, 33656, -44.1898, -0.110432  
63871, 33534, -44.2517, -0.110587  
63872, 33734, -44.3136, -0.110741  
63873, 34062, -44.3756, -0.110896  
63874, 34454, -44.4375, -0.111051  
63875, 34986, -44.4994, -0.111206  
63876, 35682, -44.5613, -0.111360  
63877, 36322, -44.6233, -0.111515  
63878, 36576, -44.6852, -0.111670  
63879, 36310, -44.7471, -0.111825  
63880, 35722, -44.8090, -0.111979  
63881, 35176, -44.8710, -0.112134  
63882, 34878, -44.9329, -0.112289  
63883, 34736, -44.9948, -0.112444  
63884, 34546, -45.0567, -0.112599  
63885, 34224, -45.1187, -0.112753  
63886, 33926, -45.1806, -0.112908  
63887, 33872, -45.2425, -0.113063  
63888, 34148, -45.3045, -0.113218  
63889, 34612, -45.3664, -0.113372  
63890, 35024, -45.4283, -0.113527  
63891, 35166, -45.4902, -0.113682  
63892, 34960, -45.5522, -0.113837  
63893, 34484, -45.6141, -0.113991  
63894, 33926, -45.6760, -0.114146  
63895, 33668, -45.7379, -0.114301  
63896, 33818, -45.7999, -0.114456  
63897, 34368, -45.8618, -0.114610  
63898, 35006, -45.9237, -0.114765  
63899, 35372, -45.9857, -0.114920  
63900, 35296, -46.0476, -0.115075  
63901, 34946, -46.1095, -0.115229  
63902, 34628, -46.1714, -0.115384  
63903, 34506, -46.2334, -0.115539  
63904, 34508, -46.2953, -0.115694  
63905, 34424, -46.3572, -0.115848  
63906, 34158, -46.4191, -0.116003  
63907, 33812, -46.4811, -0.116158  
63908, 33576, -46.5430, -0.116313  
63909, 33554, -46.6049, -0.116467  
63910, 33758, -46.6668, -0.116622  
63911, 34172, -46.7288, -0.116777  
63912, 34772, -46.7907, -0.116932  
63913, 35460, -46.8526, -0.117086  
63914, 35972, -46.9146, -0.117241  
63915, 35980, -46.9765, -0.117396  
63916, 35368, -47.0384, -0.117551  
63917, 34378, -47.1003, -0.117706  
63918, 33478, -47.1623, -0.117860  
63919, 33036, -47.2242, -0.118015  
63920, 33058, -47.2861, -0.118170  
63921, 33256, -47.3480, -0.118325  
63922, 33348, -47.4100, -0.118479  
63923, 33270, -47.4719, -0.118634  
63924, 33158, -47.5338, -0.118789  
63925, 33104, -47.5958, -0.118944  
63926, 33058, -47.6577, -0.119098  
63927, 32842, -47.7196, -0.119253  
63928, 32380, -47.7815, -0.119408  
63929, 31764, -47.8435, -0.119563  
63930, 31244, -47.9054, -0.119717  
63931, 31068, -47.9673, -0.119872  
63932, 31404, -48.0292, -0.120027  
63933, 32246, -48.0912, -0.120182  
63934, 33378, -48.1531, -0.120336  
63935, 34408, -48.2150, -0.120491  
63936, 34932, -48.2769, -0.120646  
63937, 34728, -48.3389, -0.120801  
63938, 33940, -48.4008, -0.120955  
63939, 32984, -48.4627, -0.121110  
63940, 32270, -48.5247, -0.121265  
63941, 31988, -48.5866, -0.121420  
63942, 32094, -48.6485, -0.121574  
63943, 32442, -48.7104, -0.121729  
63944, 32938, -48.7724, -0.121884  
63945, 33500, -48.8343, -0.122039  
63946, 33982, -48.8962, -0.122193  
63947, 34200, -48.9581, -0.122348  
63948, 34114, -49.0201, -0.122503  
63949, 33936, -49.0820, -0.122658  
63950, 33980, -49.1439, -0.122813  
63951, 34394, -49.2059, -0.122967  
63952, 34984, -49.2678, -0.123122  
63953, 35374, -49.3297, -0.123277  
63954, 35388, -49.3916, -0.123432  
63955, 35206, -49.4536, -0.123586  
63956, 35200, -49.5155, -0.123741  
63957, 35564, -49.5774, -0.123896  
63958, 36152, -49.6393, -0.124051  
63959, 36616, -49.7013, -0.124205  
63960, 36716, -49.7632, -0.124360  
63961, 36422, -49.8251, -0.124515  
63962, 35822, -49.8870, -0.124670  
63963, 34978, -49.9490, -0.124824  
63964, 33934, -50.0109, -0.124979  
63965, 32890, -50.0728, -0.125134  
63966, 32188, -50.1348, -0.125289  
63967, 32130, -50.1967, -0.125443  
63968, 32702, -50.2586, -0.125598  
63969, 33566, -50.3205, -0.125753  
63970, 34312, -50.3825, -0.125908  
63971, 34728, -50.4444, -0.126062  
63972, 34906, -50.5063, -0.126217  
63973, 35022, -50.5682, -0.126372  
63974, 35140, -50.6302, -0.126527  
63975, 35200, -50.6921, -0.126681  
63976, 35168, -50.7540, -0.126836  
63977, 35090, -50.8159, -0.126991  
63978, 35002, -50.8779, -0.127146  
63979, 34840, -50.9398, -0.127300  
63980, 34478, -51.0017, -0.127455  
63981, 33948, -51.0637, -0.127610  
63982, 33542, -51.1256, -0.127765  
63983, 33614, -51.1875, -0.127920  
63984, 34266, -51.2494, -0.128074  
63985, 35162, -51.3114, -0.128229  
63986, 35746, -51.3733, -0.128384  
63987, 35626, -51.4352, -0.128539  
63988, 34882, -51.4971, -0.128693  
63989, 33968, -51.5591, -0.128848  
63990, 33400, -51.6210, -0.129003  
63991, 33458, -51.6829, -0.129158  
63992, 34070, -51.7449, -0.129312  
63993, 34924, -51.8068, -0.129467  
63994, 35654, -51.8687, -0.129622  
63995, 35992, -51.9306, -0.129777  
63996, 35910, -51.9926, -0.129931  
63997, 35580, -52.0545, -0.130086  
63998, 35246, -52.1164, -0.130241  
63999, 34998, -52.1783, -0.130396  
64000, 34718, -52.2403, -0.130550  
64001, 34220, -52.3022, -0.130705  
64002, 33514, -52.3641, -0.130860  
64003, 32908, -52.4260, -0.131015  
64004, 32746, -52.4880, -0.131169  
64005, 33038, -52.5499, -0.131324  
64006, 33388, -52.6118, -0.131479  
64007, 33324, -52.6738, -0.131634  
64008, 32766, -52.7357, -0.131788  
64009, 32140, -52.7976, -0.131943  
64010, 31994, -52.8595, -0.132098  
64011, 32472, -52.9215, -0.132253  
64012, 33212, -52.9834, -0.132408  
64013, 33708, -53.0453, -0.132562  
64014, 33824, -53.1072, -0.132717  
64015, 33846, -53.1692, -0.132872  
64016, 34114, -53.2311, -0.133027  
64017, 34626, -53.2930, -0.133181  
64018, 35020, -53.3550, -0.133336  
64019, 34988, -53.4169, -0.133491  
64020, 34600, -53.4788, -0.133646  
64021, 34240, -53.5407, -0.133800  
64022, 34254, -53.6027, -0.133955  
64023, 34678, -53.6646, -0.134110  
64024, 35320, -53.7265, -0.134265  
64025, 35996, -53.7884, -0.134419  
64026, 36626, -53.8504, -0.134574

64027, 37124, -53.9123, -0.134729  
64028, 37266, -53.9742, -0.134884  
64029, 36822, -54.0361, -0.135038  
64030, 35812, -54.0981, -0.135193  
64031, 34606, -54.1600, -0.135348  
64032, 33650, -54.2219, -0.135503  
64033, 33124, -54.2839, -0.135657  
64034, 32884, -54.3458, -0.135812  
64035, 32708, -54.4077, -0.135967  
64036, 32622, -54.4696, -0.136122  
64037, 32874, -54.5316, -0.136276  
64038, 33600, -54.5935, -0.136431  
64039, 34576, -54.6554, -0.136586  
64040, 35332, -54.7173, -0.136741  
64041, 35550, -54.7793, -0.136895  
64042, 35310, -54.8412, -0.137050  
64043, 34964, -54.9031, -0.137205  
64044, 34770, -54.9651, -0.137360  
64045, 34754, -55.0270, -0.137515  
64046, 34816, -55.0889, -0.137669  
64047, 34980, -55.1508, -0.137824  
64048, 35378, -55.2128, -0.137979  
64049, 36030, -55.2747, -0.138134  
64050, 36682, -55.3366, -0.138288  
64051, 36972, -55.3985, -0.138443  
64052, 36748, -55.4605, -0.138598  
64053, 36248, -55.5224, -0.138753  
64054, 35832, -55.5843, -0.138907  
64055, 35676, -55.6462, -0.139062  
64056, 35598, -55.7082, -0.139217  
64057, 35366, -55.7701, -0.139372  
64058, 35008, -55.8320, -0.139526  
64059, 34860, -55.8940, -0.139681  
64060, 35248, -55.9559, -0.139836  
64061, 36120, -56.0178, -0.139991  
64062, 37014, -56.0797, -0.140145  
64063, 37410, -56.1417, -0.140300  
64064, 37102, -56.2036, -0.140455  
64065, 36304, -56.2655, -0.140610  
64066, 35408, -56.3274, -0.140764  
64067, 34686, -56.3894, -0.140919  
64068, 34144, -56.4513, -0.141074  
64069, 33652, -56.5132, -0.141229  
64070, 33156, -56.5752, -0.141383  
64071, 32776, -56.6371, -0.141538  
64072, 32738, -56.6990, -0.141693  
64073, 33188, -56.7609, -0.141848  
64074, 34038, -56.8229, -0.142002  
64075, 34978, -56.8848, -0.142157  
64076, 35630, -56.9467, -0.142312  
64077, 35790, -57.0086, -0.142467  
64078, 35552, -57.0706, -0.142622  
64079, 35238, -57.1325, -0.142776  
64080, 35124, -57.1944, -0.142931  
64081, 35220, -57.2563, -0.143086  
64082, 35310, -57.3183, -0.143241  
64083, 35186, -57.3802, -0.143395  
64084, 34874, -57.4421, -0.143550  
64085, 34620, -57.5041, -0.143705  
64086, 34612, -57.5660, -0.143860  
64087, 34814, -57.6279, -0.144014  
64088, 35010, -57.6898, -0.144169  
64089, 35068, -57.7518, -0.144324  
64090, 35080, -57.8137, -0.144479  
64091, 35246, -57.8756, -0.144633  
64092, 35616, -57.9375, -0.144788  
64093, 35962, -57.9995, -0.144943  
64094, 35978, -58.0614, -0.145098  
64095, 35546, -58.1233, -0.145252  
64096, 34824, -58.1853, -0.145407  
64097, 34070, -58.2472, -0.145562  
64098, 33422, -58.3091, -0.145717  
64099, 32872, -58.3710, -0.145871  
64100, 32392, -58.4330, -0.146026  
64101, 32038, -58.4949, -0.146181  
64102, 31906, -58.5568, -0.146336  
64103, 31972, -58.6187, -0.146490  
64104, 32104, -58.6807, -0.146645  
64105, 32198, -58.7426, -0.146800  
64106, 32304, -58.8045, -0.146955  
64107, 32540, -58.8664, -0.147109  
64108, 32878, -58.9284, -0.147264  
64109, 33072, -58.9903, -0.147419  
64110, 32884, -59.0522, -0.147574  
64111, 32358, -59.1142, -0.147729  
64112, 31900, -59.1761, -0.147883  
64113, 31940, -59.2380, -0.148038  
64114, 32604, -59.2999, -0.148193  
64115, 33604, -59.3619, -0.148348  
64116, 34524, -59.4238, -0.148502  
64117, 35162, -59.4857, -0.148657  
64118, 35586, -59.5476, -0.148812  
64119, 35898, -59.6096, -0.148967  
64120, 36056, -59.6715, -0.149121  
64121, 35902, -59.7334, -0.149276  
64122, 35204, -59.7954, -0.149431  
64123, 34698, -59.8573, -0.149586  
64124, 34052, -59.9192, -0.149740  
64125, 33592, -59.9811, -0.149895  
64126, 33280, -60.0431, -0.150050  
64127, 33062, -60.1050, -0.150205  
64128, 32940, -60.1669, -0.150359  
64129, 32928, -60.2288, -0.150514  
64130, 32910, -60.2908, -0.150669  
64131, 32710, -60.3527, -0.150824  
64132, 32322, -60.4146, -0.150978  
64133, 32036, -60.4765, -0.151133  
64134, 32234, -60.5385, -0.151288  
64135, 32982, -60.6004, -0.151443  
64136, 33846, -60.6623, -0.151597  
64137, 34208, -60.7243, -0.151752  
64138, 33818, -60.7862, -0.151907  
64139, 33028, -60.8481, -0.152062  
64140, 32500, -60.9100, -0.152216  
64141, 32604, -60.9720, -0.152371  
64142, 33132, -61.0339, -0.152526  
64143, 33544, -61.0958, -0.152681  
64144, 33492, -61.1577, -0.152836  
64145, 33058, -61.2197, -0.152990  
64146, 32564, -61.2816, -0.153145  
64147, 32238, -61.3435, -0.153300  
64148, 32104, -61.4055, -0.153455  
64149, 32120, -61.4674, -0.153609  
64150, 32354, -61.5293, -0.153764  
64151, 32866, -61.5912, -0.153919  
64152, 33540, -61.6532, -0.154074  
64153, 34106, -61.7151, -0.154228  
64154, 34364, -61.7770, -0.154383  
64155, 34452, -61.8389, -0.154538  
64156, 34716, -61.9009, -0.154693  
64157, 35350, -61.9628, -0.154847  
64158, 36130, -62.0247, -0.155002  
64159, 36570, -62.0866, -0.155157  
64160, 36406, -62.1486, -0.155312  
64161, 35848, -62.2105, -0.155466  
64162, 35406, -62.2724, -0.155621  
64163, 35424, -62.3344, -0.155776  
64164, 35824, -62.3963, -0.155931  
64165, 36242, -62.4582, -0.156085  
64166, 36388, -62.5201, -0.156240  
64167, 36260, -62.5821, -0.156395  
64168, 36018, -62.6440, -0.156550  
64169, 35800, -62.7059, -0.156704  
64170, 35604, -62.7678, -0.156859  
64171, 35402, -62.8298, -0.157014  
64172, 35176, -62.8917, -0.157169  
64173, 34914, -62.9536, -0.157323  
64174, 34568, -63.0156, -0.157478  
64175, 34084, -63.0775, -0.157633  
64176, 33540, -63.1394, -0.157788  
64177, 33140, -63.2013, -0.157943  
64178, 33066, -63.2633, -0.158097  
64179, 33278, -63.3252, -0.158252  
64180, 33546, -63.3871, -0.158407  
64181, 33688, -63.4490, -0.158562  
64182, 33748, -63.5110, -0.158716  
64183, 33916, -63.5729, -0.158871  
64184, 34262, -63.6348, -0.159026  
64185, 34594, -63.6967, -0.159181  
64186, 34656, -63.7587, -0.159335  
64187, 34426, -63.8206, -0.159490  
64188, 34192, -63.8825, -0.159645  
64189, 34232, -63.9445, -0.159800  
64190, 34490, -64.0064, -0.159954  
64191, 34574, -64.0683, -0.160109  
64192, 34172, -64.1302, -0.160264  
64193, 33418, -64.1922, -0.160419  
64194, 32836, -64.2541, -0.160573  
64195, 32860, -64.3160, -0.160728  
64196, 33428, -64.3779, -0.160883  
64197, 34048, -64.4399, -0.161038  
64198, 34238, -64.5018, -0.161192  
64199, 33948, -64.5637, -0.161347  
64200, 33520, -64.6256, -0.161502  
64201, 33350, -64.6876, -0.161657  
64202, 33554, -64.7495, -0.161811  
64203, 33978, -64.8114, -0.161966  
64204, 34404, -64.8734, -0.162121  
64205, 34698, -64.9353, -0.162276  
64206, 34808, -64.9972, -0.162430  
64207, 34708, -65.0591, -0.162585  
64208, 34380, -65.1211, -0.162740  
64209, 33914, -65.1830, -0.162895  
64210, 33458, -65.2449, -0.163050  
64211, 33118, -65.3068, -0.163204  
64212, 32848, -65.3688, -0.163359  
64213, 32534, -65.4307, -0.163514  
64214, 32166, -65.4926, -0.163669  
64215, 31886, -65.5546, -0.163823  
64216, 31876, -65.6165, -0.163978  
64217, 32144, -65.6784, -0.164133  
64218, 32564, -65.7403, -0.164288  
64219, 33006, -65.8023, -0.164442  
64220, 33504, -65.8642, -0.164597  
64221, 34156, -65.9261, -0.164752  
64222, 34898, -65.9880, -0.164907  
64223, 35436, -66.0500, -0.165061  
64224, 35482, -66.1119, -0.165216  
64225, 35012, -66.1738, -0.165371  
64226, 34344, -66.2357, -0.165526  
64227, 33814, -66.2977, -0.165680  
64228, 33488, -66.3596, -0.165835  
64229, 33164, -66.4215, -0.165990  
64230, 32700, -66.4835, -0.166145  
64231, 32310, -66.5454, -0.166299  
64232, 32438, -66.6073, -0.166454  
64233, 33314, -66.6692, -0.166609  
64234, 34692, -66.7312, -0.166764  
64235, 35980, -66.7931, -0.166918  
64236, 36714, -66.8550, -0.167073  
64237, 36836, -66.9169, -0.167228  
64238, 36616, -66.9789, -0.167383  
64239, 36282, -67.0408, -0.167537  
64240, 35848, -67.1027, -0.167692  
64241, 35226, -67.1647, -0.167847  
64242, 34470, -67.2266, -0.168002  
64243, 33818, -67.2885, -0.168157  
64244, 33476, -67.3504, -0.168311  
64245, 33434, -67.4124, -0.168466  
64246, 33504, -67.4743, -0.168621  
64247, 33502, -67.5362, -0.168776  
64248, 33454, -67.5981, -0.168930  
64249, 33518, -67.6601, -0.169085  
64250, 33798, -67.7220, -0.169240  
64251, 34268, -67.7839, -0.169395  
64252, 34846, -67.8458, -0.169549  
64253, 35460, -67.9078, -0.169704  
64254, 36074, -67.9697, -0.169859

64255, 36596, -68.0316, -0.170014  
64256, 36888, -68.0936, -0.170168  
64257, 36882, -68.1555, -0.170323  
64258, 36680, -68.2174, -0.170478  
64259, 36498, -68.2793, -0.170633  
64260, 36476, -68.3413, -0.170787  
64261, 36586, -68.4032, -0.170942  
64262, 36690, -68.4651, -0.171097  
64263, 36718, -68.5270, -0.171252  
64264, 36752, -68.5890, -0.171406  
64265, 36888, -68.6509, -0.171561  
64266, 37084, -68.7128, -0.171716  
64267, 37182, -68.7748, -0.171871  
64268, 37066, -68.8367, -0.172025  
64269, 36818, -68.8986, -0.172180  
64270, 36640, -68.9605, -0.172335  
64271, 36628, -69.0225, -0.172490  
64272, 36654, -69.0844, -0.172644  
64273, 36490, -69.1463, -0.172799  
64274, 36058, -69.2082, -0.172954  
64275, 35532, -69.2702, -0.173109  
64276, 35202, -69.3321, -0.173264  
64277, 35226, -69.3940, -0.173418  
64278, 35522, -69.4559, -0.173573  
64279, 35854, -69.5179, -0.173728  
64280, 36030, -69.5798, -0.173883  
64281, 35980, -69.6417, -0.174037  
64282, 35762, -69.7037, -0.174192  
64283, 35494, -69.7656, -0.174347  
64284, 35336, -69.8275, -0.174502  
64285, 35420, -69.8894, -0.174656  
64286, 35764, -69.9514, -0.174811  
64287, 36202, -70.0133, -0.174966  
64288, 36450, -70.0752, -0.175121  
64289, 36284, -70.1371, -0.175275  
64290, 35742, -70.1991, -0.175430  
64291, 35090, -70.2610, -0.175585  
64292, 34644, -70.3229, -0.175740  
64293, 34542, -70.3849, -0.175894  
64294, 34748, -70.4468, -0.176049  
64295, 35126, -70.5087, -0.176204  
64296, 35586, -70.5706, -0.176359  
64297, 36068, -70.6326, -0.176513  
64298, 36482, -70.6945, -0.176668  
64299, 36722, -70.7564, -0.176823  
64300, 36718, -70.8183, -0.176978  
64301, 36486, -70.8803, -0.177132  
64302, 36090, -70.9422, -0.177287  
64303, 35544, -71.0041, -0.177442  
64304, 34832, -71.0660, -0.177597  
64305, 34052, -71.1280, -0.177752  
64306, 33456, -71.1899, -0.177906  
64307, 33342, -71.2518, -0.178061  
64308, 33786, -71.3138, -0.178216  
64309, 34550, -71.3757, -0.178371  
64310, 35258, -71.4376, -0.178525  
64311, 35722, -71.4995, -0.178680  
64312, 36062, -71.5615, -0.178835  
64313, 36510, -71.6234, -0.178990  
64314, 37094, -71.6853, -0.179144  
64315, 37582, -71.7472, -0.179299  
64316, 37720, -71.8092, -0.179454  
64317, 37526, -71.8711, -0.179609  
64318, 37308, -71.9330, -0.179763  
64319, 37362, -71.9950, -0.179918  
64320, 37718, -72.0569, -0.180073  
64321, 38164, -72.1188, -0.180228  
64322, 38500, -72.1807, -0.180382  
64323, 38692, -72.2427, -0.180537  
64324, 38808, -72.3046, -0.180692  
64325, 38790, -72.3665, -0.180847  
64326, 38454, -72.4284, -0.181001  
64327, 37700, -72.4904, -0.181156  
64328, 36704, -72.5523, -0.181311  
64329, 35840, -72.6142, -0.181466  
64330, 35358, -72.6761, -0.181620

64331, 35182, -72.7381, -0.181775  
64332, 35008, -72.8000, -0.181930  
64333, 34630, -72.8619, -0.182085  
64334, 34134, -72.9239, -0.182239  
64335, 33734, -72.9858, -0.182394  
64336, 33566, -73.0477, -0.182549  
64337, 33572, -73.1096, -0.182704  
64338, 33670, -73.1716, -0.182859  
64339, 33922, -73.2335, -0.183013  
64340, 34460, -73.2954, -0.183168  
64341, 35264, -73.3573, -0.183323  
64342, 36056, -73.4193, -0.183478  
64343, 36474, -73.4812, -0.183632  
64344, 36356, -73.5431, -0.183787  
64345, 35856, -73.6051, -0.183942  
64346, 35286, -73.6670, -0.184097  
64347, 34886, -73.7289, -0.184251  
64348, 34772, -73.7908, -0.184406  
64349, 34982, -73.8528, -0.184561  
64350, 35550, -73.9147, -0.184716  
64351, 36374, -73.9766, -0.184870  
64352, 37158, -74.0385, -0.185025  
64353, 37546, -74.1005, -0.185180  
64354, 37432, -74.1624, -0.185335  
64355, 37074, -74.2243, -0.185489  
64356, 36880, -74.2862, -0.185644  
64357, 36964, -74.3482, -0.185799  
64358, 37032, -74.4101, -0.185954  
64359, 36620, -74.4720, -0.186108  
64360, 35614, -74.5340, -0.186263  
64361, 34370, -74.5959, -0.186418  
64362, 33370, -74.6578, -0.186573  
64363, 32812, -74.7197, -0.186727  
64364, 32490, -74.7817, -0.186882  
64365, 32160, -74.8436, -0.187037  
64366, 31862, -74.9055, -0.187192  
64367, 31858, -74.9674, -0.187346  
64368, 32298, -75.0294, -0.187501  
64369, 32968, -75.0913, -0.187656  
64370, 33518, -75.1532, -0.187811  
64371, 33816, -75.2152, -0.187966  
64372, 34072, -75.2771, -0.188120  
64373, 34526, -75.3390, -0.188275  
64374, 35134, -75.4009, -0.188430  
64375, 35556, -75.4629, -0.188585  
64376, 35590, -75.5248, -0.188739  
64377, 35440, -75.5867, -0.188894  
64378, 35536, -75.6486, -0.189049  
64379, 36060, -75.7106, -0.189204  
64380, 36720, -75.7725, -0.189358  
64381, 37034, -75.8344, -0.189513  
64382, 36828, -75.8963, -0.189668  
64383, 36418, -75.9583, -0.189823  
64384, 36236, -76.0202, -0.189977  
64385, 36384, -76.0821, -0.190132  
64386, 36562, -76.1441, -0.190287  
64387, 36478, -76.2060, -0.190442  
64388, 36198, -76.2679, -0.190596  
64389, 36056, -76.3298, -0.190751  
64390, 36238, -76.3918, -0.190906  
64391, 36522, -76.4537, -0.191061  
64392, 36534, -76.5156, -0.191215  
64393, 36192, -76.5775, -0.191370  
64394, 35820, -76.6395, -0.191525  
64395, 35800, -76.7014, -0.191680  
64396, 36140, -76.7633, -0.191834  
64397, 36442, -76.8253, -0.191989  
64398, 36306, -76.8872, -0.192144  
64399, 35770, -76.9491, -0.192299  
64400, 35214, -77.0110, -0.192453  
64401, 34992, -77.0730, -0.192608  
64402, 35116, -77.1349, -0.192763  
64403, 35368, -77.1968, -0.192918  
64404, 35626, -77.2587, -0.193073  
64405, 35940, -77.3207, -0.193227  
64406, 36334, -77.3826, -0.193382

64407, 36594, -77.4445, -0.193537  
64408, 36392, -77.5064, -0.193692  
64409, 35668, -77.5684, -0.193846  
64410, 34844, -77.6303, -0.194001  
64411, 34522, -77.6922, -0.194156  
64412, 34978, -77.7542, -0.194311  
64413, 35924, -77.8161, -0.194465  
64414, 36794, -77.8780, -0.194620  
64415, 37270, -77.9399, -0.194775  
64416, 37460, -78.0019, -0.194930  
64417, 37648, -78.0638, -0.195084  
64418, 37914, -78.1257, -0.195239  
64419, 38040, -78.1876, -0.195394  
64420, 37786, -78.2496, -0.195549  
64421, 37192, -78.3115, -0.195703  
64422, 36634, -78.3734, -0.195858  
64423, 36078, -78.4353, -0.196013  
64424, 35852, -78.4973, -0.196168  
64425, 35722, -78.5592, -0.196322  
64426, 35548, -78.6211, -0.196477  
64427, 35306, -78.6831, -0.196632  
64428, 34998, -78.7450, -0.196787  
64429, 34558, -78.8069, -0.196941  
64430, 33932, -78.8688, -0.197096  
64431, 33200, -78.9308, -0.197251  
64432, 32590, -78.9927, -0.197406  
64433, 32282, -79.0546, -0.197560  
64434, 32276, -79.1165, -0.197715  
64435, 32444, -79.1785, -0.197870  
64436, 32684, -79.2404, -0.198025  
64437, 33032, -79.3023, -0.198180  
64438, 33538, -79.3643, -0.198334  
64439, 34072, -79.4262, -0.198489  
64440, 34390, -79.4881, -0.198644  
64441, 34366, -79.5500, -0.198799  
64442, 34172, -79.6120, -0.198953  
64443, 34142, -79.6739, -0.199108  
64444, 34440, -79.7358, -0.199263  
64445, 34878, -79.7977, -0.199418  
64446, 35122, -79.8597, -0.199572  
64447, 35034, -79.9216, -0.199727  
64448, 34810, -79.9835, -0.199882  
64449, 34752, -80.0454, -0.200037  
64450, 34916, -80.1074, -0.200191  
64451, 35108, -80.1693, -0.200346  
64452, 35126, -80.2312, -0.200501  
64453, 35004, -80.2932, -0.200656  
64454, 34938, -80.3551, -0.200810  
64455, 34998, -80.4170, -0.200965  
64456, 35002, -80.4789, -0.201120  
64457, 34748, -80.5409, -0.201275  
64458, 34338, -80.6028, -0.201429  
64459, 34162, -80.6647, -0.201584  
64460, 34534, -80.7266, -0.201739  
64461, 35308, -80.7886, -0.201894  
64462, 35996, -80.8505, -0.202048  
64463, 36214, -80.9124, -0.202203  
64464, 36024, -80.9744, -0.202358  
64465, 35846, -81.0363, -0.202513  
64466, 35966, -81.0982, -0.202667  
64467, 36322, -81.1601, -0.202822  
64468, 36646, -81.2221, -0.202977  
64469, 36906, -81.2840, -0.203132  
64470, 37340, -81.3459, -0.203287  
64471, 38128, -81.4078, -0.203441  
64472, 39038, -81.4698, -0.203596  
64473, 39490, -81.5317, -0.203751  
64474, 39086, -81.5936, -0.203906  
64475, 37990, -81.6555, -0.204060  
64476, 36804, -81.7175, -0.204215  
64477, 36014, -81.7794, -0.204370  
64478, 35592, -81.8413, -0.204525  
64479, 35132, -81.9033, -0.204679  
64480, 34398, -81.9652, -0.204834  
64481, 33592, -82.0271, -0.204989  
64482, 33174, -82.0890, -0.205144



64483, 33368, -82.1510, -0.205298  
64484, 33930, -82.2129, -0.205453  
64485, 34376, -82.2748, -0.205608  
64486, 34400, -82.3367, -0.205763  
64487, 34082, -82.3987, -0.205917  
64488, 33736, -82.4606, -0.206072  
64489, 33620, -82.5225, -0.206227  
64490, 33796, -82.5845, -0.206382  
64491, 34170, -82.6464, -0.206536  
64492, 34580, -82.7083, -0.206691  
64493, 34854, -82.7702, -0.206846  
64494, 34836, -82.8322, -0.207001  
64495, 34482, -82.8941, -0.207155  
64496, 33942, -82.9560, -0.207310  
64497, 33496, -83.0179, -0.207465  
64498, 33380, -83.0799, -0.207620  
64499, 33588, -83.1418, -0.207774  
64500, 33898, -83.2037, -0.207929  
64501, 34126, -83.2656, -0.208084  
64502, 34238, -83.3276, -0.208239  
64503, 34312, -83.3895, -0.208394  
64504, 34346, -83.4514, -0.208548  
64505, 34210, -83.5134, -0.208703  
64506, 33802, -83.5753, -0.208858  
64507, 33242, -83.6372, -0.209013  
64508, 32838, -83.6991, -0.209167  
64509, 32866, -83.7611, -0.209322  
64510, 33324, -83.8230, -0.209477  
64511, 33990, -83.8849, -0.209632  
64512, 34658, -83.9468, -0.209786  
64513, 35302, -84.0088, -0.209941  
64514, 35962, -84.0707, -0.210096  
64515, 36562, -84.1326, -0.210251  
64516, 36902, -84.1946, -0.210405  
64517, 36840, -84.2565, -0.210560  
64518, 36536, -84.3184, -0.210715  
64519, 36348, -84.3803, -0.210870  
64520, 36538, -84.4423, -0.211024  
64521, 37004, -84.5042, -0.211179  
64522, 37390, -84.5661, -0.211334  
64523, 37382, -84.6280, -0.211489  
64524, 36970, -84.6900, -0.211643  
64525, 36366, -84.7519, -0.211798  
64526, 35816, -84.8138, -0.211953  
64527, 35438, -84.8757, -0.212108  
64528, 35316, -84.9377, -0.212262  
64529, 35540, -84.9996, -0.212417  
64530, 36140, -85.0615, -0.212572  
64531, 36938, -85.1235, -0.212727  
64532, 37566, -85.1854, -0.212881  
64533, 37742, -85.2473, -0.213036  
64534, 37528, -85.3092, -0.213191  
64535, 37290, -85.3712, -0.213346  
64536, 37332, -85.4331, -0.213501  
64537, 37596, -85.4950, -0.213655  
64538, 37688, -85.5569, -0.213810  
64539, 37324, -85.6189, -0.213965  
64540, 36616, -85.6808, -0.214120  
64541, 36014, -85.7427, -0.214274  
64542, 35878, -85.8047, -0.214429  
64543, 36184, -85.8666, -0.214584  
64544, 36588, -85.9285, -0.214739  
64545, 36806, -85.9904, -0.214893  
64546, 36848, -86.0524, -0.215048  
64547, 36888, -86.1143, -0.215203  
64548, 36982, -86.1762, -0.215358  
64549, 36980, -86.2381, -0.215512  
64550, 36684, -86.3001, -0.215667  
64551, 36118, -86.3620, -0.215822  
64552, 35544, -86.4239, -0.215977  
64553, 35240, -86.4858, -0.216131  
64554, 35242, -86.5478, -0.216286  
64555, 35388, -86.6097, -0.216441  
64556, 35486, -86.6716, -0.216596  
64557, 35520, -86.7336, -0.216750  
64558, 35604, -86.7955, -0.216905

64559, 35816, -86.8574, -0.217060  
64560, 36122, -86.9193, -0.217215  
64561, 36414, -86.9813, -0.217369  
64562, 36672, -87.0432, -0.217524  
64563, 36954, -87.1051, -0.217679  
64564, 37316, -87.1670, -0.217834  
64565, 37696, -87.2290, -0.217988  
64566, 37906, -87.2909, -0.218143  
64567, 37754, -87.3528, -0.218298  
64568, 37188, -87.4148, -0.218453  
64569, 36316, -87.4767, -0.218608  
64570, 35424, -87.5386, -0.218762  
64571, 34800, -87.6005, -0.218917  
64572, 34658, -87.6625, -0.219072  
64573, 34982, -87.7244, -0.219227  
64574, 35566, -87.7863, -0.219381  
64575, 36144, -87.8482, -0.219536  
64576, 36572, -87.9102, -0.219691  
64577, 36922, -87.9721, -0.219846  
64578, 37330, -88.0340, -0.220000  
64579, 37824, -88.0959, -0.220155  
64580, 38254, -88.1579, -0.220310  
64581, 38430, -88.2198, -0.220465  
64582, 38362, -88.2817, -0.220619  
64583, 38250, -88.3437, -0.220774  
64584, 38256, -88.4056, -0.220929  
64585, 38292, -88.4675, -0.221084  
64586, 38026, -88.5294, -0.221238  
64587, 37226, -88.5914, -0.221393  
64588, 36054, -88.6533, -0.221548  
64589, 35052, -88.7152, -0.221703  
64590, 34726, -88.7771, -0.221857  
64591, 35172, -88.8391, -0.222012  
64592, 36050, -88.9010, -0.222167  
64593, 36890, -88.9629, -0.222322  
64594, 37412, -89.0249, -0.222476  
64595, 37642, -89.0868, -0.222631  
64596, 37724, -89.1487, -0.222786  
64597, 37758, -89.2106, -0.222941  
64598, 37824, -89.2726, -0.223096  
64599, 38028, -89.3345, -0.223250  
64600, 38494, -89.3964, -0.223405  
64601, 39190, -89.4583, -0.223560  
64602, 39892, -89.5203, -0.223715  
64603, 40302, -89.5822, -0.223869  
64604, 40334, -89.6441, -0.224024  
64605, 40184, -89.7060, -0.224179  
64606, 40150, -89.7680, -0.224334  
64607, 40298, -89.8299, -0.224488  
64608, 40386, -89.8918, -0.224643  
64609, 40080, -89.9538, -0.224798  
64610, 39286, -90.0157, -0.224953  
64611, 38242, -90.0776, -0.225107  
64612, 37306, -90.1395, -0.225262  
64613, 36642, -90.2015, -0.225417  
64614, 36162, -90.2634, -0.225572  
64615, 35688, -90.3253, -0.225726  
64616, 35198, -90.3872, -0.225881  
64617, 34852, -90.4492, -0.226036  
64618, 34832, -90.5111, -0.226191  
64619, 35182, -90.5730, -0.226345  
64620, 35766, -90.6349, -0.226500  
64621, 36382, -90.6969, -0.226655  
64622, 36870, -90.7588, -0.226810  
64623, 37154, -90.8207, -0.226964  
64624, 37240, -90.8827, -0.227119  
64625, 37230, -90.9446, -0.227274  
64626, 37286, -91.0065, -0.227429  
64627, 37580, -91.0684, -0.227583  
64628, 38114, -91.1304, -0.227738  
64629, 38692, -91.1923, -0.227893  
64630, 38990, -91.2542, -0.228048  
64631, 38782, -91.3161, -0.228203  
64632, 38054, -91.3781, -0.228357  
64633, 37014, -91.4400, -0.228512  
64634, 35980, -91.5019, -0.228667

64635, 35254, -91.5639, -0.228822  
64636, 35024, -91.6258, -0.228976  
64637, 35342, -91.6877, -0.229131  
64638, 36104, -91.7496, -0.229286  
64639, 37074, -91.8116, -0.229441  
64640, 37978, -91.8735, -0.229595  
64641, 38658, -91.9354, -0.229750  
64642, 39116, -91.9973, -0.229905  
64643, 39412, -92.0593, -0.230060  
64644, 39516, -92.1212, -0.230214  
64645, 39322, -92.1831, -0.230369  
64646, 38796, -92.2450, -0.230524  
64647, 38142, -92.3070, -0.230679  
64648, 37746, -92.3689, -0.230833  
64649, 37894, -92.4308, -0.230988  
64650, 38514, -92.4928, -0.231143  
64651, 39220, -92.5547, -0.231298  
64652, 39646, -92.6166, -0.231452  
64653, 39734, -92.6785, -0.231607  
64654, 39754, -92.7405, -0.231762  
64655, 39994, -92.8024, -0.231917  
64656, 40514, -92.8643, -0.232071  
64657, 41112, -92.9262, -0.232226  
64658, 41562, -92.9882, -0.232381  
64659, 41782, -93.0501, -0.232536  
64660, 41836, -93.1120, -0.232690  
64661, 41782, -93.1740, -0.232845  
64662, 41560, -93.2359, -0.233000  
64663, 41090, -93.2978, -0.233155  
64664, 40402, -93.3597, -0.233310  
64665, 39630, -93.4217, -0.233464  
64666, 38950, -93.4836, -0.233619  
64667, 38438, -93.5455, -0.233774  
64668, 38096, -93.6074, -0.233929  
64669, 37908, -93.6694, -0.234083  
64670, 37888, -93.7313, -0.234238  
64671, 38016, -93.7932, -0.234393  
64672, 38200, -93.8551, -0.234548  
64673, 38316, -93.9171, -0.234702  
64674, 38296, -93.9790, -0.234857  
64675, 38150, -94.0409, -0.235012  
64676, 37916, -94.1029, -0.235167  
64677, 37588, -94.1648, -0.235321  
64678, 37172, -94.2267, -0.235476  
64679, 36750, -94.2886, -0.235631  
64680, 36494, -94.3506, -0.235786  
64681, 36472, -94.4125, -0.235940  
64682, 36548, -94.4744, -0.236095  
64683, 36428, -94.5363, -0.236250  
64684, 35970, -94.5983, -0.236405  
64685, 35404, -94.6602, -0.236559  
64686, 35232, -94.7221, -0.236714  
64687, 35828, -94.7841, -0.236869  
64688, 37088, -94.8460, -0.237024  
64689, 38486, -94.9079, -0.237178  
64690, 39480, -94.9698, -0.237333  
64691, 39878, -95.0318, -0.237488  
64692, 39916, -95.0937, -0.237643  
64693, 39982, -95.1556, -0.237797  
64694, 40314, -95.2175, -0.237952  
64695, 40880, -95.2795, -0.238107  
64696, 41488, -95.3414, -0.238262  
64697, 41890, -95.4033, -0.238417  
64698, 41886, -95.4652, -0.238571  
64699, 41376, -95.5272, -0.238726  
64700, 40466, -95.5891, -0.238881  
64701, 39524, -95.6510, -0.239036  
64702, 38986, -95.7130, -0.239190  
64703, 39036, -95.7749, -0.239345  
64704, 39394, -95.8368, -0.239500  
64705, 39560, -95.8987, -0.239655  
64706, 39202, -95.9607, -0.239809  
64707, 38472, -96.0226, -0.239964  
64708, 37808, -96.0845, -0.240119  
64709, 37526, -96.1464, -0.240274  
64710, 37532, -96.2084, -0.240428

64711, 37508, -96.2703, -0.240583  
64712, 37332, -96.3322, -0.240738  
64713, 37198, -96.3942, -0.240893  
64714, 37410, -96.4561, -0.241047  
64715, 37990, -96.5180, -0.241202  
64716, 38594, -96.5799, -0.241357  
64717, 38864, -96.6419, -0.241512  
64718, 38790, -96.7038, -0.241666  
64719, 38688, -96.7657, -0.241821  
64720, 38828, -96.8276, -0.241976  
64721, 39130, -96.8896, -0.242131  
64722, 39252, -96.9515, -0.242285  
64723, 38978, -97.0134, -0.242440  
64724, 38492, -97.0753, -0.242595  
64725, 38222, -97.1373, -0.242750  
64726, 38432, -97.1992, -0.242904  
64727, 38988, -97.2611, -0.243059  
64728, 39526, -97.3231, -0.243214  
64729, 39804, -97.3850, -0.243369  
64730, 39896, -97.4469, -0.243524  
64731, 40002, -97.5088, -0.243678  
64732, 40232, -97.5708, -0.243833  
64733, 40474, -97.6327, -0.243988  
64734, 40536, -97.6946, -0.244143  
64735, 40304, -97.7565, -0.244297  
64736, 39832, -97.8185, -0.244452  
64737, 39278, -97.8804, -0.244607  
64738, 38870, -97.9423, -0.244762  
64739, 38818, -98.0043, -0.244916  
64740, 39202, -98.0662, -0.245071  
64741, 39844, -98.1281, -0.245226  
64742, 40318, -98.1900, -0.245381  
64743, 40208, -98.2520, -0.245535  
64744, 39476, -98.3139, -0.245690  
64745, 38578, -98.3758, -0.245845  
64746, 38128, -98.4377, -0.246000  
64747, 38380, -98.4997, -0.246154  
64748, 38998, -98.5616, -0.246309  
64749, 39352, -98.6235, -0.246464  
64750, 39130, -98.6854, -0.246619  
64751, 38574, -98.7474, -0.246773  
64752, 38260, -98.8093, -0.246928  
64753, 38480, -98.8712, -0.247083  
64754, 39020, -98.9332, -0.247238  
64755, 39374, -98.9951, -0.247392  
64756, 39280, -99.0570, -0.247547  
64757, 38930, -99.1189, -0.247702  
64758, 38718, -99.1809, -0.247857  
64759, 38858, -99.2428, -0.248011  
64760, 39218, -99.3047, -0.248166  
64761, 39538, -99.3666, -0.248321  
64762, 39700, -99.4286, -0.248476  
64763, 39794, -99.4905, -0.248631  
64764, 39910, -99.5524, -0.248785  
64765, 40000, -99.6144, -0.248940  
64766, 39928, -99.6763, -0.249095  
64767, 39680, -99.7382, -0.249250  
64768, 39430, -99.8001, -0.249404  
64769, 39382, -99.8621, -0.249559  
64770, 39562, -99.9240, -0.249714  
64771, 39804, -99.9859, -0.249869  
64772, 39892, -100.0478, -0.250023  
64773, 39784, -100.1098, -0.250178  
64774, 39626, -100.1717, -0.250333  
64775, 39598, -100.2336, -0.250488  
64776, 39772, -100.2955, -0.250642  
64777, 40072, -100.3575, -0.250797  
64778, 40330, -100.4194, -0.250952  
64779, 40396, -100.4813, -0.251107  
64780, 40184, -100.5433, -0.251261  
64781, 39720, -100.6052, -0.251416  
64782, 39178, -100.6671, -0.251571  
64783, 38812, -100.7290, -0.251726  
64784, 38824, -100.7910, -0.251880  
64785, 39218, -100.8529, -0.252035  
64786, 39796, -100.9148, -0.252190  
64787, 40338, -100.9767, -0.252345  
64788, 40752, -101.0387, -0.252499  
64789, 41134, -101.1006, -0.252654  
64790, 41604, -101.1625, -0.252809  
64791, 42120, -101.2245, -0.252964  
64792, 42518, -101.2864, -0.253118  
64793, 42628, -101.3483, -0.253273  
64794, 42420, -101.4102, -0.253428  
64795, 41944, -101.4722, -0.253583  
64796, 41244, -101.5341, -0.253738  
64797, 40328, -101.5960, -0.253892  
64798, 39280, -101.6579, -0.254047  
64799, 38352, -101.7199, -0.254202  
64800, 37870, -101.7818, -0.254357  
64801, 38006, -101.8437, -0.254511  
64802, 38640, -101.9056, -0.254666  
64803, 39422, -101.9676, -0.254821  
64804, 40052, -102.0295, -0.254976  
64805, 40394, -102.0914, -0.255130  
64806, 40498, -102.1534, -0.255285  
64807, 40424, -102.2153, -0.255440  
64808, 40226, -102.2772, -0.255595  
64809, 39988, -102.3391, -0.255749  
64810, 39890, -102.4011, -0.255904  
64811, 40058, -102.4630, -0.256059  
64812, 40440, -102.5249, -0.256214  
64813, 40796, -102.5868, -0.256368  
64814, 40944, -102.6488, -0.256523  
64815, 40950, -102.7107, -0.256678  
64816, 41062, -102.7726, -0.256833  
64817, 41442, -102.8346, -0.256987  
64818, 41924, -102.8965, -0.257142  
64819, 42132, -102.9584, -0.257297  
64820, 41878, -103.0203, -0.257452  
64821, 41368, -103.0823, -0.257606  
64822, 41060, -103.1442, -0.257761  
64823, 41228, -103.2061, -0.257916  
64824, 41730, -103.2680, -0.258071  
64825, 42124, -103.3300, -0.258225  
64826, 42094, -103.3919, -0.258380  
64827, 41672, -103.4538, -0.258535  
64828, 41142, -103.5157, -0.258690  
64829, 40778, -103.5777, -0.258845  
64830, 40674, -103.6396, -0.258999  
64831, 40816, -103.7015, -0.259154  
64832, 41186, -103.7635, -0.259309  
64833, 41736, -103.8254, -0.259464  
64834, 42296, -103.8873, -0.259618  
64835, 42586, -103.9492, -0.259773  
64836, 42430, -104.0112, -0.259928  
64837, 41940, -104.0731, -0.260083  
64838, 41498, -104.1350, -0.260237  
64839, 41450, -104.1969, -0.260392  
64840, 41860, -104.2589, -0.260547  
64841, 42498, -104.3208, -0.260702  
64842, 43070, -104.3827, -0.260856  
64843, 43408, -104.4446, -0.261011  
64844, 43478, -104.5066, -0.261166  
64845, 43260, -104.5685, -0.261321  
64846, 42716, -104.6304, -0.261475  
64847, 41902, -104.6924, -0.261630  
64848, 41056, -104.7543, -0.261785  
64849, 40490, -104.8162, -0.261940  
64850, 40364, -104.8781, -0.262094  
64851, 40580, -104.9401, -0.262249  
64852, 40882, -105.0020, -0.262404  
64853, 41106, -105.0639, -0.262559  
64854, 41284, -105.1258, -0.262713  
64855, 41492, -105.1878, -0.262868  
64856, 41672, -105.2497, -0.263023  
64857, 41658, -105.3116, -0.263178  
64858, 41354, -105.3736, -0.263333  
64859, 40874, -105.4355, -0.263487  
64860, 40476, -105.4974, -0.263642  
64861, 40310, -105.5593, -0.263797  
64862, 40318, -105.6213, -0.263952  
64863, 40368, -105.6832, -0.264106  
64864, 40462, -105.7451, -0.264261  
64865, 40712, -105.8070, -0.264416  
64866, 41174, -105.8690, -0.264571  
64867, 41662, -105.9309, -0.264725  
64868, 41884, -105.9928, -0.264880  
64869, 41698, -106.0547, -0.265035  
64870, 41324, -106.1167, -0.265190  
64871, 41150, -106.1786, -0.265344  
64872, 41390, -106.2405, -0.265499  
64873, 41918, -106.3025, -0.265654  
64874, 42422, -106.3644, -0.265809  
64875, 42712, -106.4263, -0.265963  
64876, 42864, -106.4882, -0.266118  
64877, 43048, -106.5502, -0.266273  
64878, 43290, -106.6121, -0.266428  
64879, 43468, -106.6740, -0.266582  
64880, 43450, -106.7359, -0.266737  
64881, 43300, -106.7979, -0.266892  
64882, 43208, -106.8598, -0.267047  
64883, 43280, -106.9217, -0.267201  
64884, 43422, -106.9837, -0.267356  
64885, 43396, -107.0456, -0.267511  
64886, 43078, -107.1075, -0.267666  
64887, 42586, -107.1694, -0.267820  
64888, 42186, -107.2314, -0.267975  
64889, 42108, -107.2933, -0.268130  
64890, 42390, -107.3552, -0.268285  
64891, 42878, -107.4171, -0.268440  
64892, 43308, -107.4791, -0.268594  
64893, 43428, -107.5410, -0.268749  
64894, 43124, -107.6029, -0.268904  
64895, 42526, -107.6648, -0.269059  
64896, 41934, -107.7268, -0.269213  
64897, 41656, -107.7887, -0.269368  
64898, 41760, -107.8506, -0.269523  
64899, 42014, -107.9126, -0.269678  
64900, 42092, -107.9745, -0.269832  
64901, 41864, -108.0364, -0.269987  
64902, 41550, -108.0983, -0.270142  
64903, 41488, -108.1603, -0.270297  
64904, 41786, -108.2222, -0.270451  
64905, 42220, -108.2841, -0.270606  
64906, 42462, -108.3460, -0.270761  
64907, 42448, -108.4080, -0.270916  
64908, 42414, -108.4699, -0.271070  
64909, 42676, -108.5318, -0.271225  
64910, 43250, -108.5938, -0.271380  
64911, 43834, -108.6557, -0.271535  
64912, 44090, -108.7176, -0.271689  
64913, 43958, -108.7795, -0.271844  
64914, 43684, -108.8415, -0.271999  
64915, 43558, -108.9034, -0.272154  
64916, 43664, -108.9653, -0.272308  
64917, 43900, -109.0272, -0.272463  
64918, 44144, -109.0892, -0.272618  
64919, 44382, -109.1511, -0.272773  
64920, 44618, -109.2130, -0.272927  
64921, 44748, -109.2749, -0.273082  
64922, 44596, -109.3369, -0.273237  
64923, 44134, -109.3988, -0.273392  
64924, 43598, -109.4607, -0.273547  
64925, 43346, -109.5227, -0.273701  
64926, 43572, -109.5846, -0.273856  
64927, 44124, -109.6465, -0.274011  
64928, 44642, -109.7084, -0.274166  
64929, 44882, -109.7704, -0.274320  
64930, 44838, -109.8323, -0.274475  
64931, 44660, -109.8942, -0.274630  
64932, 44444, -109.9561, -0.274785  
64933, 44154, -110.0181, -0.274939  
64934, 43730, -110.0800, -0.275094  
64935, 43226, -110.1419, -0.275249  
64936, 42780, -110.2039, -0.275404  
64937, 42496, -110.2658, -0.275558  
64938, 42386, -110.3277, -0.275713

64939, 42422, -110.3896, -0.275868  
64940, 42602, -110.4516, -0.276023  
64941, 42912, -110.5135, -0.276177  
64942, 43218, -110.5754, -0.276332  
64943, 43258, -110.6373, -0.276487  
64944, 42854, -110.6993, -0.276642  
64945, 42126, -110.7612, -0.276796  
64946, 41466, -110.8231, -0.276951  
64947, 41272, -110.8850, -0.277106  
64948, 41602, -110.9470, -0.277261  
64949, 42182, -111.0089, -0.277415  
64950, 42646, -111.0708, -0.277570  
64951, 42862, -111.1328, -0.277725  
64952, 42972, -111.1947, -0.277880  
64953, 43158, -111.2566, -0.278034  
64954, 43404, -111.3185, -0.278189  
64955, 43486, -111.3805, -0.278344  
64956, 43240, -111.4424, -0.278499  
64957, 42716, -111.5043, -0.278654  
64958, 42610, -111.5662, -0.278808  
64959, 41810, -111.6282, -0.278963  
64960, 41728, -111.6901, -0.279118  
64961, 41810, -111.7520, -0.279273  
64962, 41898, -111.8140, -0.279427  
64963, 41904, -111.8759, -0.279582  
64964, 41840, -111.9378, -0.279737  
64965, 41804, -111.9997, -0.279892  
64966, 41964, -112.0617, -0.280046  
64967, 42468, -112.1236, -0.280201  
64968, 43328, -112.1855, -0.280356  
64969, 44326, -112.2474, -0.280511  
64970, 45114, -112.3094, -0.280665  
64971, 45410, -112.3713, -0.280820  
64972, 45232, -112.4332, -0.280975  
64973, 44862, -112.4951, -0.281130  
64974, 44648, -112.5571, -0.281284  
64975, 44724, -112.6190, -0.281439  
64976, 44980, -112.6809, -0.281594  
64977, 45196, -112.7429, -0.281749  
64978, 45260, -112.8048, -0.281903  
64979, 45230, -112.8667, -0.282058  
64980, 45240, -112.9286, -0.282213  
64981, 45394, -112.9906, -0.282368  
64982, 45694, -113.0525, -0.282522  
64983, 46038, -113.1144, -0.282677  
64984, 46256, -113.1763, -0.282832  
64985, 46164, -113.2383, -0.282987  
64986, 45692, -113.3002, -0.283141  
64987, 45034, -113.3621, -0.283296  
64988, 44578, -113.4241, -0.283451  
64989, 44660, -113.4860, -0.283606  
64990, 45258, -113.5479, -0.283761  
64991, 45926, -113.6098, -0.283915  
64992, 46130, -113.6718, -0.284070  
64993, 45676, -113.7337, -0.284225  
64994, 44870, -113.7956, -0.284380  
64995, 44228, -113.8575, -0.284534  
64996, 43990, -113.9195, -0.284689  
64997, 43960, -113.9814, -0.284844  
64998, 43782, -114.0433, -0.284999  
64999, 43348, -114.1052, -0.285153  
65000, 42928, -114.1672, -0.285308  
65001, 42912, -114.2291, -0.285463  
65002, 43382, -114.2910, -0.285618  
65003, 44078, -114.3530, -0.285772  
65004, 44642, -114.4149, -0.285927  
65005, 44932, -114.4768, -0.286082  
65006, 45058, -114.5387, -0.286237  
65007, 45160, -114.6007, -0.286391  
65008, 45252, -114.6626, -0.286546  
65009, 45258, -114.7245, -0.286701  
65010, 45214, -114.7864, -0.286856  
65011, 45274, -114.8484, -0.287010  
65012, 45568, -114.9103, -0.287165  
65013, 46040, -114.9722, -0.287320  
65014, 46494, -115.0342, -0.287475

65015, 46836, -115.0961, -0.287629  
65016, 47170, -115.1580, -0.287784  
65017, 47646, -115.2199, -0.287939  
65018, 48212, -115.2819, -0.288094  
65019, 48546, -115.3438, -0.288248  
65020, 48328, -115.4057, -0.288403  
65021, 47546, -115.4676, -0.288558  
65022, 46548, -115.5296, -0.288713  
65023, 45762, -115.5915, -0.288868  
65024, 45412, -115.6534, -0.289022  
65025, 45408, -115.7153, -0.289177  
65026, 45576, -115.7773, -0.289332  
65027, 45816, -115.8392, -0.289487  
65028, 46146, -115.9011, -0.289641  
65029, 46538, -115.9631, -0.289796  
65030, 46908, -116.0250, -0.289951  
65031, 47166, -116.0869, -0.290106  
65032, 47340, -116.1488, -0.290260  
65033, 47492, -116.2108, -0.290415  
65034, 47584, -116.2727, -0.290570  
65035, 47394, -116.3346, -0.290725  
65036, 46712, -116.3965, -0.290879  
65037, 45584, -116.4585, -0.291034  
65038, 44374, -116.5204, -0.291189  
65039, 43546, -116.5823, -0.291344  
65040, 43342, -116.6443, -0.291498  
65041, 43698, -116.7062, -0.291653  
65042, 44324, -116.7681, -0.291808  
65043, 44942, -116.8300, -0.291963  
65044, 45374, -116.8920, -0.292117  
65045, 45554, -116.9539, -0.292272  
65046, 45512, -117.0158, -0.292427  
65047, 45402, -117.0777, -0.292582  
65048, 45472, -117.1397, -0.292736  
65049, 45866, -117.2016, -0.292891  
65050, 46434, -117.2635, -0.293046  
65051, 46778, -117.3254, -0.293201  
65052, 46554, -117.3874, -0.293355  
65053, 45826, -117.4493, -0.293510  
65054, 45078, -117.5112, -0.293665  
65055, 44812, -117.5732, -0.293820  
65056, 45150, -117.6351, -0.293975  
65057, 45748, -117.6970, -0.294129  
65058, 46170, -117.7589, -0.294284  
65059, 46286, -117.8209, -0.294439  
65060, 46338, -117.8828, -0.294594  
65061, 46640, -117.9447, -0.294748  
65062, 47234, -118.0066, -0.294903  
65063, 47872, -118.0686, -0.295058  
65064, 48266, -118.1305, -0.295213  
65065, 48342, -118.1924, -0.295367  
65066, 48252, -118.2543, -0.295522  
65067, 48168, -118.3163, -0.295677  
65068, 48156, -118.3782, -0.295832  
65069, 48186, -118.4401, -0.295986  
65070, 48256, -118.5021, -0.296141  
65071, 48360, -118.5640, -0.296296  
65072, 48472, -118.6259, -0.296451  
65073, 48468, -118.6878, -0.296605  
65074, 48278, -118.7498, -0.296760  
65075, 47944, -118.8117, -0.296915  
65076, 47622, -118.8736, -0.297070  
65077, 47394, -118.9355, -0.297224  
65078, 47212, -118.9975, -0.297379  
65079, 46994, -119.0594, -0.297534  
65080, 46778, -119.1213, -0.297689  
65081, 46746, -119.1833, -0.297843  
65082, 47000, -119.2452, -0.297998  
65083, 47384, -119.3071, -0.298153  
65084, 47574, -119.3690, -0.298308  
65085, 47382, -119.4310, -0.298462  
65086, 47000, -119.4929, -0.298617  
65087, 46874, -119.5548, -0.298772  
65088, 47302, -119.6167, -0.298927  
65089, 48140, -119.6787, -0.299082  
65090, 48922, -119.7406, -0.299236

65091, 49234, -119.8025, -0.299391  
65092, 49034, -119.8644, -0.299546  
65093, 48568, -119.9264, -0.299701  
65094, 48110, -119.9883, -0.299855  
65095, 47760, -120.0502, -0.300010  
65096, 47502, -120.1122, -0.300165  
65097, 47320, -120.1741, -0.300320  
65098, 47248, -120.2360, -0.300474  
65099, 47280, -120.2979, -0.300629  
65100, 47342, -120.3599, -0.300784  
65101, 47396, -120.4218, -0.300939  
65102, 47552, -120.4837, -0.301093  
65103, 47994, -120.5456, -0.301248  
65104, 48734, -120.6076, -0.301403  
65105, 49494, -120.6695, -0.301558  
65106, 49854, -120.7314, -0.301712  
65107, 49644, -120.7934, -0.301867  
65108, 49102, -120.8553, -0.302022  
65109, 48692, -120.9172, -0.302177  
65110, 48696, -120.9791, -0.302331  
65111, 48984, -121.0411, -0.302486  
65112, 49208, -121.1030, -0.302641  
65113, 49132, -121.1649, -0.302796  
65114, 48818, -121.2268, -0.302950  
65115, 48476, -121.2888, -0.303105  
65116, 48228, -121.3507, -0.303260  
65117, 48060, -121.4126, -0.303415  
65118, 47952, -121.4745, -0.303569  
65119, 48002, -121.5365, -0.303724  
65120, 48338, -121.5984, -0.303879  
65121, 48916, -121.6603, -0.304034  
65122, 49494, -121.7223, -0.304189  
65123, 49794, -121.7842, -0.304343  
65124, 49770, -121.8461, -0.304498  
65125, 49622, -121.9080, -0.304653  
65126, 49586, -121.9700, -0.304808  
65127, 49724, -122.0319, -0.304962  
65128, 49880, -122.0938, -0.305117  
65129, 49916, -122.1557, -0.305272  
65130, 49842, -122.2177, -0.305427  
65131, 49774, -122.2796, -0.305581  
65132, 49780, -122.3415, -0.305736  
65133, 49816, -122.4035, -0.305891  
65134, 49798, -122.4654, -0.306046  
65135, 49706, -122.5273, -0.306200  
65136, 49612, -122.5892, -0.306355  
65137, 49556, -122.6512, -0.306510  
65138, 49522, -122.7131, -0.306665  
65139, 49482, -122.7750, -0.306819  
65140, 49492, -122.8369, -0.306974  
65141, 49644, -122.8989, -0.307129  
65142, 49958, -122.9608, -0.307284  
65143, 50308, -123.0227, -0.307438  
65144, 50518, -123.0846, -0.307593  
65145, 50508, -123.1466, -0.307748  
65146, 50362, -123.2085, -0.307903  
65147, 50192, -123.2704, -0.308057  
65148, 50034, -123.3324, -0.308212  
65149, 49850, -123.3943, -0.308367  
65150, 49690, -123.4562, -0.308522  
65151, 49696, -123.5181, -0.308677  
65152, 49950, -123.5801, -0.308831  
65153, 50294, -123.6420, -0.308986  
65154, 50382, -123.7039, -0.309141  
65155, 50004, -123.7658, -0.309296  
65156, 49334, -123.8278, -0.309450  
65157, 48848, -123.8897, -0.309605  
65158, 48882, -123.9516, -0.309760  
65159, 49328, -124.0136, -0.309915  
65160, 49730, -124.0755, -0.310069  
65161, 49740, -124.1374, -0.310224  
65162, 49434, -124.1993, -0.310379  
65163, 49200, -124.2613, -0.310534  
65164, 49302, -124.3232, -0.310688  
65165, 49646, -124.3851, -0.310843  
65166, 49936, -124.4470, -0.310998

65167, 50044, -124.5090, -0.311153  
65168, 50132, -124.5709, -0.311307  
65169, 50418, -124.6328, -0.311462  
65170, 50858, -124.6947, -0.311617  
65171, 51146, -124.7567, -0.311772  
65172, 51004, -124.8186, -0.311926  
65173, 50524, -124.8805, -0.312081  
65174, 50048, -124.9425, -0.312236  
65175, 49854, -125.0044, -0.312391  
65176, 49880, -125.0663, -0.312545  
65177, 49850, -125.1282, -0.312700  
65178, 49600, -125.1902, -0.312855  
65179, 49268, -125.2521, -0.313010  
65180, 49092, -125.3140, -0.313164  
65181, 49196, -125.3759, -0.313319  
65182, 49456, -125.4379, -0.313474  
65183, 49734, -125.4998, -0.313629  
65184, 50038, -125.5617, -0.313784  
65185, 50498, -125.6237, -0.313938  
65186, 51168, -125.6856, -0.314093  
65187, 51892, -125.7475, -0.314248  
65188, 52436, -125.8094, -0.314403  
65189, 52708, -125.8714, -0.314557  
65190, 52830, -125.9333, -0.314712  
65191, 52974, -125.9952, -0.314867  
65192, 53158, -126.0571, -0.315022  
65193, 53250, -126.1191, -0.315176  
65194, 53152, -126.1810, -0.315331  
65195, 52940, -126.2429, -0.315486  
65196, 52796, -126.3048, -0.315641  
65197, 52796, -126.3668, -0.315795  
65198, 52836, -126.4287, -0.315950  
65199, 52740, -126.4906, -0.316105  
65200, 52458, -126.5526, -0.316260  
65201, 52114, -126.6145, -0.316414  
65202, 51894, -126.6764, -0.316569  
65203, 51864, -126.7383, -0.316724  
65204, 51942, -126.8003, -0.316879  
65205, 52016, -126.8622, -0.317033  
65206, 52014, -126.9241, -0.317188  
65207, 51880, -126.9860, -0.317343  
65208, 51528, -127.0480, -0.317498  
65209, 50886, -127.1099, -0.317652  
65210, 49996, -127.1718, -0.317807  
65211, 49064, -127.2338, -0.317962  
65212, 48376, -127.2957, -0.318117  
65213, 48134, -127.3576, -0.318271  
65214, 48360, -127.4195, -0.318426  
65215, 48938, -127.4815, -0.318581  
65216, 49722, -127.5434, -0.318736  
65217, 50540, -127.6053, -0.318891  
65218, 51186, -127.6672, -0.319045  
65219, 51496, -127.7292, -0.319200  
65220, 51456, -127.7911, -0.319355  
65221, 51274, -127.8530, -0.319510  
65222, 51230, -127.9149, -0.319664  
65223, 51444, -127.9769, -0.319819  
65224, 51750, -128.0388, -0.319974  
65225, 51862, -128.1007, -0.320129  
65226, 51690, -128.1627, -0.320283  
65227, 51456, -128.2246, -0.320438  
65228, 51486, -128.2865, -0.320593  
65229, 51866, -128.3484, -0.320748  
65230, 52326, -128.4104, -0.320902  
65231, 52510, -128.4723, -0.321057  
65232, 52310, -128.5342, -0.321212  
65233, 51990, -128.5961, -0.321367  
65234, 51888, -128.6581, -0.321521  
65235, 52094, -128.7200, -0.321676  
65236, 52400, -128.7819, -0.321831  
65237, 52546, -128.8439, -0.321986  
65238, 52528, -128.9058, -0.322140  
65239, 52576, -128.9677, -0.322295  
65240, 52904, -129.0296, -0.322450  
65241, 53470, -129.0916, -0.322605  
65242, 54022, -129.1535, -0.322759

65243, 54338, -129.2154, -0.322914  
65244, 54398, -129.2773, -0.323069  
65245, 54370, -129.3393, -0.323224  
65246, 54398, -129.4012, -0.323378  
65247, 54514, -129.4631, -0.323533  
65248, 54650, -129.5250, -0.323688  
65249, 54732, -129.5870, -0.323843  
65250, 54730, -129.6489, -0.323998  
65251, 54624, -129.7108, -0.324152  
65252, 54426, -129.7728, -0.324307  
65253, 54198, -129.8347, -0.324462  
65254, 54062, -129.8966, -0.324617  
65255, 54088, -129.9585, -0.324771  
65256, 54228, -130.0205, -0.324926  
65257, 54302, -130.0824, -0.325081  
65258, 54170, -130.1443, -0.325236  
65259, 53848, -130.2062, -0.325390  
65260, 53502, -130.2682, -0.325545  
65261, 53276, -130.3301, -0.325700  
65262, 53172, -130.3920, -0.325855  
65263, 53082, -130.4539, -0.326009  
65264, 52964, -130.5159, -0.326164  
65265, 52916, -130.5778, -0.326319  
65266, 53070, -130.6397, -0.326474  
65267, 53380, -130.7017, -0.326628  
65268, 53622, -130.7636, -0.326783  
65269, 53570, -130.8255, -0.326938  
65270, 53210, -130.8874, -0.327093  
65271, 52798, -130.9494, -0.327247  
65272, 52648, -131.0113, -0.327402  
65273, 52914, -131.0732, -0.327557  
65274, 53526, -131.1351, -0.327712  
65275, 54282, -131.1971, -0.327866  
65276, 54976, -131.2590, -0.328021  
65277, 55470, -131.3209, -0.328176  
65278, 55688, -131.3829, -0.328331  
65279, 55622, -131.4448, -0.328485  
65280, 55366, -131.5067, -0.328640  
65281, 55040, -131.5686, -0.328795  
65282, 54724, -131.6306, -0.328950  
65283, 54372, -131.6925, -0.329105  
65284, 53870, -131.7544, -0.329259  
65285, 53228, -131.8163, -0.329414  
65286, 52640, -131.8783, -0.329569  
65287, 52370, -131.9402, -0.329724  
65288, 52526, -132.0021, -0.329878  
65289, 52984, -132.0640, -0.330033  
65290, 53504, -132.1260, -0.330188  
65291, 53956, -132.1879, -0.330343  
65292, 54374, -132.2498, -0.330497  
65293, 54812, -132.3118, -0.330652  
65294, 55192, -132.3737, -0.330807  
65295, 55330, -132.4356, -0.330962  
65296, 55150, -132.4975, -0.331116  
65297, 54788, -132.5595, -0.331271  
65298, 54506, -132.6214, -0.331426  
65299, 54456, -132.6833, -0.331581  
65300, 54580, -132.7452, -0.331735  
65301, 54752, -132.8072, -0.331890  
65302, 54968, -132.8691, -0.332045  
65303, 55364, -132.9310, -0.332200  
65304, 56012, -132.9930, -0.332354  
65305, 56764, -133.0549, -0.332509  
65306, 57346, -133.1168, -0.332664  
65307, 57580, -133.1787, -0.332819  
65308, 57522, -133.2407, -0.332973  
65309, 57374, -133.3026, -0.333128  
65310, 57244, -133.3645, -0.333283  
65311, 57124, -133.4264, -0.333438  
65312, 57008, -133.4884, -0.333592  
65313, 57056, -133.5503, -0.333747  
65314, 57464, -133.6122, -0.333902  
65315, 58218, -133.6741, -0.334057  
65316, 58996, -133.7361, -0.334212  
65317, 59380, -133.7980, -0.334366  
65318, 59216, -133.8599, -0.334521

65319, 58722, -133.9219, -0.334676  
65320, 58254, -133.9838, -0.334831  
65321, 57956, -134.0457, -0.334985  
65322, 57660, -134.1076, -0.335140  
65323, 57172, -134.1696, -0.335295  
65324, 56536, -134.2315, -0.335450  
65325, 56048, -134.2934, -0.335604  
65326, 55956, -134.3553, -0.335759  
65327, 56250, -134.4173, -0.335914  
65328, 56688, -134.4792, -0.336069  
65329, 57080, -134.5411, -0.336223  
65330, 57404, -134.6031, -0.336378  
65331, 57720, -134.6650, -0.336533  
65332, 57990, -134.7269, -0.336688  
65333, 58078, -134.7888, -0.336842  
65334, 57918, -134.8508, -0.336997  
65335, 57624, -134.9127, -0.337152  
65336, 57364, -134.9746, -0.337307  
65337, 57142, -135.0365, -0.337461  
65338, 56792, -135.0985, -0.337616  
65339, 56198, -135.1604, -0.337771  
65340, 55516, -135.2223, -0.337926  
65341, 55106, -135.2842, -0.338080  
65342, 55170, -135.3462, -0.338235  
65343, 55546, -135.4081, -0.338390  
65344, 55858, -135.4700, -0.338545  
65345, 55914, -135.5320, -0.338699  
65346, 55904, -135.5939, -0.338854  
65347, 56152, -135.6558, -0.339009  
65348, 56764, -135.7177, -0.339164  
65349, 57480, -135.7797, -0.339319  
65350, 57954, -135.8416, -0.339473  
65351, 58118, -135.9035, -0.339628  
65352, 58210, -135.9654, -0.339783  
65353, 58476, -136.0274, -0.339938  
65354, 58866, -136.0893, -0.340092  
65355, 59118, -136.1512, -0.340247  
65356, 59072, -136.2132, -0.340402  
65357, 58852, -136.2751, -0.340557  
65358, 58716, -136.3370, -0.340711  
65359, 58778, -136.3989, -0.340866  
65360, 58910, -136.4609, -0.341021  
65361, 58994, -136.5228, -0.341176  
65362, 59118, -136.5847, -0.341330  
65363, 59474, -136.6466, -0.341485  
65364, 60062, -136.7086, -0.341640  
65365, 60572, -136.7705, -0.341795  
65366, 60638, -136.8324, -0.341949  
65367, 60220, -136.8943, -0.342104  
65368, 59668, -136.9563, -0.342259  
65369, 59384, -137.0182, -0.342414  
65370, 59416, -137.0801, -0.342568  
65371, 59474, -137.1421, -0.342723  
65372, 59310, -137.2040, -0.342878  
65373, 59028, -137.2659, -0.343033  
65374, 58978, -137.3278, -0.343187  
65375, 59300, -137.3898, -0.343342  
65376, 59712, -137.4517, -0.343497  
65377, 59780, -137.5136, -0.343652  
65378, 59380, -137.5755, -0.343806  
65379, 58828, -137.6375, -0.343961  
65380, 58552, -137.6994, -0.344116  
65381, 58634, -137.7613, -0.344271  
65382, 58762, -137.8233, -0.344426  
65383, 58634, -137.8852, -0.344580  
65384, 58328, -137.9471, -0.344735  
65385, 58198, -138.0090, -0.344890  
65386, 58466, -138.0710, -0.345045  
65387, 58924, -138.1329, -0.345199  
65388, 59146, -138.1948, -0.345354  
65389, 58968, -138.2567, -0.345509  
65390, 58656, -138.3187, -0.345664  
65391, 58628, -138.3806, -0.345818  
65392, 59002, -138.4425, -0.345973  
65393, 59498, -138.5044, -0.346128  
65394, 59724, -138.5664, -0.346283

|                                    |                                    |         |          |          |
|------------------------------------|------------------------------------|---------|----------|----------|
| 65395, 59572, -138.6283, -0.346437 | 65471, 62256, -143.3347, -0.358199 | 359.002 | 705.455  | 705.4644 |
| 65396, 59272, -138.6902, -0.346592 | 65472, 62898, -143.3967, -0.358354 |         | 705.4677 | 705.5652 |
| 65397, 59108, -138.7522, -0.346747 | 65473, 63676, -143.4586, -0.358508 |         | 705.6161 | 705.455  |
| 65398, 59170, -138.8141, -0.346902 | 65474, 64248, -143.5205, -0.358663 |         | 705.7484 |          |
| 65399, 59386, -138.8760, -0.347056 | 65475, 64420, -143.5825, -0.358818 | 358.902 | 701.67   | 701.6797 |
| 65400, 59716, -138.9379, -0.347211 | 65476, 64340, -143.6444, -0.358973 |         | 701.6831 | 701.783  |
| 65401, 60202, -138.9999, -0.347366 | 65477, 64324, -143.7063, -0.359128 |         | 701.832  | 701.67   |
| 65402, 60824, -139.0618, -0.347521 | 65478, 64514, -143.7682, -0.359282 |         | 701.9678 |          |
| 65403, 61380, -139.1237, -0.347675 | 65479, 64742, -143.8302, -0.359437 | 358.802 | 686.585  | 686.5949 |
| 65404, 61626, -139.1856, -0.347830 | 65480, 64778, -143.8921, -0.359592 |         | 686.5986 | 686.7008 |
| 65405, 61572, -139.2476, -0.347985 | 65481, 64640, -143.9540, -0.359747 |         | 686.753  | 686.585  |
| 65406, 61530, -139.3095, -0.348140 | 65482, 64618, -144.0159, -0.359901 |         | 686.8923 |          |
| 65407, 61822, -139.3714, -0.348294 | 65483, 64926, -144.0779, -0.360056 | 358.702 | 682.885  | 682.8952 |
| 65408, 62376, -139.4334, -0.348449 | 65484, 65430, -144.1398, -0.360211 |         | 682.8991 | 683.0036 |
| 65409, 62756, -139.4953, -0.348604 | 65485, 65716, -144.2017, -0.360366 |         | 683.0592 | 682.885  |
| 65410, 62540, -139.5572, -0.348759 | 65486, 65500, -144.2636, -0.360520 |         | 683.2021 |          |
| 65411, 61818, -139.6191, -0.348913 | 65487, 64940, -144.3256, -0.360675 | 358.602 | 685.96   | 685.9704 |
| 65412, 61114, -139.6811, -0.349068 | 65488, 64490, -144.3875, -0.360830 |         | 685.9746 | 686.0814 |
| 65413, 60928, -139.7430, -0.349223 | 65489, 64490, -144.4494, -0.360985 |         | 686.1407 | 685.96   |
| 65414, 61240, -139.8049, -0.349378 | 65490, 64896, -144.5114, -0.361139 |         | 686.2872 |          |
| 65415, 61554, -139.8668, -0.349533 | 65491, 65360, -144.5733, -0.361294 | 358.502 | 683.43   | 683.4407 |
| 65416, 61380, -139.9288, -0.349687 | 65492, 65606, -144.6352, -0.361449 |         | 683.4451 | 683.5542 |
| 65417, 60694, -139.9907, -0.349842 | 65493, 65596, -144.6971, -0.361604 |         | 683.6176 | 683.43   |
| 65418, 59918, -140.0526, -0.349997 | 65494, 65462, -144.7591, -0.361758 |         | 683.7676 |          |
| 65419, 59480, -140.1145, -0.350152 | 65495, 65284, -144.8210, -0.361913 | 358.402 | 655.025  | 655.0359 |
| 65420, 59474, -140.1765, -0.350306 | 65496, 65074, -144.8829, -0.362068 |         | 655.0406 | 655.152  |
| 65421, 59660, -140.2384, -0.350461 | 65497, 64864, -144.9448, -0.362223 |         | 655.2198 | 655.025  |
| 65422, 59782, -140.3003, -0.350616 | 65498, 64800, -145.0068, -0.362377 |         | 655.3734 |          |
| 65423, 59806, -140.3623, -0.350771 | 65499, 64990, -145.0687, -0.362532 | 358.302 | 678.945  | 678.9562 |
| 65424, 59878, -140.4242, -0.350925 | 65500, 65352, -145.1306, -0.362687 |         | 678.9611 | 679.0749 |
| 65425, 60098, -140.4861, -0.351080 | 65501, 65592, -145.1926, -0.362842 |         | 679.1474 | 678.945  |
| 65426, 60440, -140.5480, -0.351235 | 65502, 65492, -145.2545, -0.362996 |         | 679.3046 |          |
| 65427, 60810, -140.6100, -0.351390 | 65503, 65086, -145.3164, -0.363151 | 358.202 | 697.065  | 697.0765 |
| 65428, 61156, -140.6719, -0.351544 | 65504, 64644, -145.3783, -0.363306 |         | 697.0817 | 697.1991 |
| 65429, 61450, -140.7338, -0.351699 | 65505, 64422, -145.4403, -0.363461 |         | 697.2754 | 697.065  |
| 65430, 61652, -140.7957, -0.351854 | 65506, 64448, -145.5022, -0.363615 |         | 697.4377 |          |
| 65431, 61700, -140.8577, -0.352009 | 65507, 64582, -145.5641, -0.363770 | 358.102 | 711.845  | 711.8568 |
| 65432, 61622, -140.9196, -0.352163 | 65508, 64712, -145.6260, -0.363925 |         | 711.8624 | 711.9834 |
| 65433, 61530, -140.9815, -0.352318 | 65509, 64830, -145.6880, -0.364080 |         | 712.0639 | 711.845  |
| 65434, 61564, -141.0435, -0.352473 | 65510, 64916, -145.7499, -0.364235 |         | 712.2314 |          |
| 65435, 61682, -141.1054, -0.352628 | 65511, 64830, -145.8118, -0.364389 | 358.002 | 706.98   | 706.9921 |
| 65436, 61688, -141.1673, -0.352782 | 65512, 64460, -145.8737, -0.364544 |         | 706.9981 | 707.1226 |
| 65437, 61406, -141.2292, -0.352937 | 65513, 63918, -145.9357, -0.364699 |         | 707.2078 | 706.98   |
| 65438, 60910, -141.2912, -0.353092 | 65514, 63614, -145.9976, -0.364854 |         | 707.3806 |          |
| 65439, 60518, -141.3531, -0.353247 | 65515, 63960, -146.0595, -0.365008 | 357.902 | 691.525  | 691.5374 |
| 65440, 60534, -141.4150, -0.353401 | 65516, 64984, -146.1215, -0.365163 |         | 691.5438 | 691.6719 |
| 65441, 61020, -141.4769, -0.353556 | 65517, 66254, -146.1834, -0.365318 |         | 691.7621 | 691.525  |
| 65442, 61732, -141.5389, -0.353711 | 65518, 67244, -146.2453, -0.365473 |         | 691.9402 |          |
| 65443, 62338, -141.6008, -0.353866 | 65519, 67752, -146.3072, -0.365627 | 357.802 | 696.165  | 696.1778 |
| 65444, 62652, -141.6627, -0.354021 | 65520, 68016, -146.3692, -0.365782 |         | 696.1845 | 696.3161 |
| 65445, 62706, -141.7246, -0.354175 | 65521, 68366, -146.4311, -0.365937 |         | 696.4121 | 696.165  |
| 65446, 62636, -141.7866, -0.354330 | 65522, 68836, -146.4930, -0.366092 |         | 696.5954 |          |
| 65447, 62556, -141.8485, -0.354485 | 65523, 69154, -146.5549, -0.366246 | 357.702 | 696.095  | 696.1081 |
| 65448, 62540, -141.9104, -0.354640 | 65524, 69048, -146.6169, -0.366401 |         | 696.1152 | 696.2504 |
| 65449, 62602, -141.9724, -0.354794 | 65525, 68588, -146.6788, -0.366556 |         | 696.3525 | 696.095  |
| 65450, 62674, -142.0343, -0.354949 | 65526, 68118, -146.7407, -0.366711 |         | 696.5412 |          |
| 65451, 62632, -142.0962, -0.355104 | 65527, 67914, -146.8027, -0.366865 | 357.602 | 691.345  | 691.3584 |
| 65452, 62360, -142.1581, -0.355259 | 65528, 67940, -146.8646, -0.367020 |         | 691.3659 | 691.5046 |
| 65453, 61884, -142.2201, -0.355413 | 65529, 67954, -146.9265, -0.367175 |         | 691.6136 | 691.345  |
| 65454, 61418, -142.2820, -0.355568 | 65530, 67794, -146.9884, -0.367330 |         | 691.8075 |          |
| 65455, 61220, -142.3439, -0.355723 | 65531, 67542, -147.0504, -0.367484 | 357.502 | 674.815  | 674.8287 |
| 65456, 61374, -142.4058, -0.355878 | 65532, 67400, -147.1123, -0.367639 |         | 674.8366 | 674.9789 |
| 65457, 61706, -142.4678, -0.356032 | 65533, 67450, -147.1742, -0.367794 |         | 675.0954 | 674.815  |
| 65458, 61978, -142.5297, -0.356187 | 65534, 67594, -147.2361, -0.367949 |         | 675.2946 |          |
| 65459, 62086, -142.5916, -0.356342 | 65535, 67718, -147.2981, -0.368103 | 357.402 | 646.13   | 646.1441 |
| 65460, 62148, -142.6536, -0.356497 | 65536, 67800, -147.3600, -0.368258 |         | 646.1526 | 646.2981 |
| 65461, 62292, -142.7155, -0.356651 |                                    |         | 646.4228 | 646.13   |
| 65462, 62492, -142.7774, -0.356806 |                                    |         | 646.6277 |          |
| 65463, 62556, -142.8393, -0.356961 |                                    | 357.302 | 672.655  | 672.6696 |
| 65464, 62366, -142.9013, -0.357116 |                                    |         | 672.6786 | 672.8274 |
| 65465, 62018, -142.9632, -0.357270 |                                    |         | 672.961  | 672.655  |
| 65466, 61756, -143.0251, -0.357425 |                                    |         | 673.1715 |          |
| 65467, 61700, -143.0870, -0.357580 |                                    | 357.202 | 670.675  | 670.69   |
| 65468, 61772, -143.1490, -0.357735 |                                    |         | 670.6996 | 670.8517 |
| 65469, 61840, -143.2109, -0.357889 |                                    |         | 670.995  | 670.675  |
| 65470, 61938, -143.2728, -0.358044 |                                    |         | 671.2112 |          |

**Representative NAP-XPS Spectrum**  
**Ca 2p**

|         |          |          |
|---------|----------|----------|
| 359.102 | 699.6    | 699.6092 |
|         | 699.6124 | 699.7074 |
|         | 699.7553 | 699.6    |
|         | 699.8843 |          |

|         |          |          |         |          |          |         |          |          |
|---------|----------|----------|---------|----------|----------|---------|----------|----------|
| 357.102 | 686.855  | 686.8704 | 355.202 | 700.645  | 700.6723 | 353.302 | 659.84   | 666.3465 |
|         | 686.8806 | 687.0364 |         | 700.7079 | 700.981  |         | 666.5171 | 667.0262 |
|         | 687.1898 | 686.855  |         | 701.593  | 700.645  |         | 671.8581 | 666.2911 |
|         | 687.4123 |          |         | 702.0191 |          |         | 672.8745 |          |
| 357.002 | 683.06   | 683.0758 | 355.102 | 674.275  | 674.3033 | 353.202 | 637.23   | 665.4612 |
|         | 683.0867 | 683.2482 |         | 674.3421 | 674.6234 |         | 665.6503 | 666.1747 |
|         | 683.4107 | 683.06   |         | 675.2892 | 674.275  |         | 671.7948 | 665.4037 |
|         | 683.6414 |          |         | 675.733  |          |         | 672.8698 |          |
| 356.902 | 702.07   | 702.0862 | 355.002 | 642.43   | 642.4593 | 353.102 | 642.74   | 664.565  |
|         | 702.0977 | 702.265  |         | 642.5014 | 642.7915 |         | 664.7748 | 665.3142 |
|         | 702.4375 | 702.07   |         | 643.5168 | 642.43   |         | 671.8834 | 664.5049 |
|         | 702.6764 |          |         | 643.9789 |          |         | 673.0227 |          |
| 356.802 | 674.73   | 674.7466 | 354.902 | 668.11   | 668.1403 | 353.002 | 677.45   | 663.6583 |
|         | 674.7587 | 674.9318 |         | 668.1834 | 668.4852 |         | 663.8913 | 664.4453 |
|         | 675.1155 | 674.73   |         | 669.2768 | 668.11   |         | 672.1582 | 663.5951 |
|         | 675.3626 |          |         | 669.7557 |          |         | 673.3679 |          |
| 356.702 | 674.735  | 674.7522 | 354.802 | 666.14   | 666.1713 | 352.902 | 679.445  | 662.7424 |
|         | 674.7651 | 674.9436 |         | 666.2179 | 666.5297 |         | 663.0023 | 663.5701 |
|         | 675.1397 | 674.735  |         | 667.3954 | 666.14   |         | 672.6702 | 662.6761 |
|         | 675.3955 |          |         | 667.8942 |          |         | 673.9568 |          |
| 356.602 | 656.8    | 656.8177 | 354.702 | 682.23   | 682.2623 | 352.802 | 666.41   | 661.8175 |
|         | 656.8316 | 657.0154 |         | 682.3127 | 682.6349 |         | 662.1086 | 662.689  |
|         | 657.2251 | 656.8    |         | 683.5835 | 682.23   |         | 673.4617 | 661.7481 |
|         | 657.4898 |          |         | 684.1034 |          |         | 674.8327 |          |
| 356.502 | 654.365  | 654.3832 | 354.602 | 680.35   | 680.3833 | 352.702 | 645.745  | 660.8831 |
|         | 654.3982 | 654.5872 |         | 680.4379 | 680.7709 |         | 661.2104 | 661.8018 |
|         | 654.812  | 654.365  |         | 681.8127 | 680.35   |         | 674.593  | 660.8105 |
|         | 655.0856 |          |         | 682.3548 |          |         | 676.0568 |          |
| 356.402 | 675.725  | 675.7438 | 354.502 | 675.41   | 675.4447 | 352.602 | 653.19   | 659.9383 |
|         | 675.7597 | 675.9539 |         | 675.5036 | 675.8477 |         | 660.3081 | 660.9078 |
|         | 676.1955 | 675.725  |         | 676.9948 | 675.41   |         | 676.1335 | 659.8625 |
|         | 676.4779 |          |         | 677.5608 |          |         | 677.7001 |          |
| 356.302 | 667.73   | 667.7493 | 354.402 | 689.675  | 689.7111 | 352.502 | 687.225  | 658.9835 |
|         | 667.7663 | 667.9657 |         | 689.7748 | 690.1305 |         | 659.4033 | 660.0081 |
|         | 668.2256 | 667.73   |         | 691.3965 | 689.675  |         | 678.1482 | 658.9047 |
|         | 668.517  |          |         | 691.9879 |          |         | 679.829  |          |
| 356.202 | 671.125  | 671.1449 | 354.302 | 681.295  | 681.3325 | 352.402 | 683.68   | 658.0212 |
|         | 671.1629 | 671.3675 |         | 681.4016 | 681.7693 |         | 658.4996 | 659.1046 |
|         | 671.6476 | 671.125  |         | 683.1706 | 681.295  |         | 680.7308 | 657.9387 |
|         | 671.9479 |          |         | 683.789  |          |         | 682.5402 |          |
| 356.102 | 682.16   | 682.1804 | 354.202 | 674.42   | 673.8206 | 352.302 | 666.42   | 657.052  |
|         | 682.1994 | 682.4093 |         | 673.8956 | 674.2758 |         | 657.5992 | 658.198  |
|         | 682.7117 | 682.16   |         | 675.8319 | 673.7817 |         | 683.9643 | 656.9645 |
|         | 683.0208 |          |         | 676.4789 |          |         | 685.9199 |          |
| 356.002 | 681.485  | 681.5061 | 354.102 | 665.63   | 673.0339 | 352.202 | 680.205  | 656.0739 |
|         | 681.5262 | 681.7411 |         | 673.1156 | 673.5087 |         | 656.704  | 657.2878 |
|         | 682.068  | 681.485  |         | 675.2422 | 672.9936 |         | 687.9291 | 655.9815 |
|         | 682.3864 |          |         | 675.9196 |          |         | 690.0504 |          |
| 355.902 | 658.61   | 658.6318 | 354.002 | 669.835  | 672.2366 | 352.102 | 687.155  | 655.0879 |
|         | 658.6537 | 658.8745 |         | 672.3257 | 672.7321 |         | 655.8192 | 656.3757 |
|         | 659.2267 | 658.61   |         | 674.6712 | 672.1948 |         | 692.7419 | 654.9904 |
|         | 659.5567 |          |         | 675.3811 |          |         | 695.0533 |          |
| 355.802 | 690.16   | 690.1825 | 353.902 | 642.89   | 671.4288 | 352.002 | 724.625  | 654.0942 |
|         | 690.2062 | 690.436  |         | 671.5263 | 671.9464 |         | 654.9503 | 655.4627 |
|         | 690.8132 | 690.16   |         | 674.124  | 671.3856 |         | 698.4679 | 653.9918 |
|         | 691.1579 |          |         | 674.8685 |          |         | 700.9996 |          |
| 355.702 | 697.165  | 697.1883 | 353.802 | 639.39   | 670.6099 | 351.902 | 712.7    | 653.095  |
|         | 697.2137 | 697.4526 |         | 670.7162 | 671.1504 |         | 654.1072 | 654.5514 |
|         | 697.8576 | 697.165  |         | 673.6065 | 670.5648 |         | 705.1899 | 652.9877 |
|         | 698.2171 |          |         | 674.3886 |          |         | 707.9806 |          |
| 355.602 | 694.19   | 694.214  | 353.702 | 656.775  | 669.7794 | 351.802 | 720.785  | 652.0899 |
|         | 694.2412 | 694.4891 |         | 669.8955 | 670.3441 |         | 653.2997 | 653.6425 |
|         | 694.9254 | 694.19   |         | 673.1282 | 669.7322 |         | 712.9924 | 651.9775 |
|         | 695.2997 |          |         | 673.9507 |          |         | 716.0918 |          |
| 355.502 | 667.605  | 667.6297 | 353.602 | 652.73   | 668.9379 | 351.702 | 727.915  | 651.0793 |
|         | 667.6587 | 667.9157 |         | 669.0652 | 669.5287 |         | 652.5439 | 652.7374 |
|         | 668.3869 | 667.605  |         | 672.6994 | 668.8887 |         | 721.8897 | 650.962  |
|         | 668.7759 |          |         | 673.5651 |          |         | 725.3642 |          |
| 355.402 | 669.1    | 669.1254 | 353.502 | 637.68   | 668.0855 | 351.602 | 739.985  | 650.0673 |
|         | 669.1562 | 669.4222 |         | 668.2255 | 668.7039 |         | 651.8602 | 651.8375 |
|         | 669.9325 | 669.1    |         | 672.3338 | 668.0342 |         | 731.9129 | 649.9415 |
|         | 670.3363 |          |         | 673.246  |          |         | 735.8532 |          |
| 355.302 | 681.335  | 681.3613 | 353.402 | 650.225  | 667.2215 | 351.502 | 740.205  | 649.0512 |
|         | 681.3937 | 681.6591 |         | 667.3758 | 667.8695 |         | 651.2798 | 650.9453 |
|         | 682.2227 | 681.335  |         | 672.0472 | 667.1682 |         | 743.0417 | 648.917  |
|         | 682.6317 |          |         | 673.0095 |          |         | 747.5671 |          |

|         |          |          |         |          |          |         |          |          |
|---------|----------|----------|---------|----------|----------|---------|----------|----------|
| 351.402 | 738.385  | 648.0312 | 349.502 | 991.44   | 629.3409 | 347.602 | 922.34   | 622.5338 |
|         | 650.8421 | 650.0621 |         | 748.5394 | 643.5581 |         | 616.3534 | 885.5075 |
|         | 755.1945 | 647.8884 |         | 860.119  | 628.8012 |         | 633.3689 | 612.8846 |
|         | 760.4646 |          |         | 995.1539 |          |         | 919.1098 |          |
| 351.302 | 774.155  | 647.0029 | 349.402 | 989.48   | 628.4736 | 347.502 | 930.225  | 624.6955 |
|         | 650.606  | 649.1897 |         | 747.1022 | 645.0074 |         | 614.8803 | 915.6225 |
|         | 768.2837 | 646.8561 |         | 846.1788 | 627.8811 |         | 629.444  | 612.1347 |
|         | 774.5142 |          |         | 983.1186 |          |         | 948.2383 |          |
| 351.202 | 806.59   | 645.9775 | 349.302 | 950.495  | 627.626  | 347.402 | 976.305  | 627.8736 |
|         | 650.6463 | 648.3326 |         | 742.5665 | 646.9617 |         | 613.6049 | 946.3412 |
|         | 782.1332 | 645.8218 |         | 831.0139 | 626.9736 |         | 626.0503 | 611.398  |
|         | 789.6244 |          |         | 967.2474 |          |         | 979.6759 |          |
| 351.102 | 796.135  | 644.9527 | 349.202 | 932.475  | 626.7977 | 347.302 | 1023.505 | 632.3791 |
|         | 651.0677 | 647.4944 |         | 735.2066 | 649.5041 |         | 612.4781 | 977.0372 |
|         | 796.5312 | 644.7873 |         | 815.0005 | 626.0768 |         | 623.1098 | 610.6771 |
|         | 805.6841 |          |         | 948.2786 |          |         | 1012.973 |          |
| 351.002 | 794.835  | 643.9283 | 349.102 | 942.93   | 625.9899 | 347.202 | 1027.16  | 638.5416 |
|         | 651.9902 | 646.6778 |         | 725.5671 | 652.7551 |         | 611.466  | 1007.035 |
|         | 811.224  | 643.7524 |         | 798.4932 | 625.19   |         | 620.5681 | 609.9745 |
|         | 822.5631 |          |         | 927.2351 |          |         | 1047.687 |          |
| 350.902 | 824.115  | 642.9044 | 349.002 | 952.685  | 625.2052 | 347.102 | 1082.48  | 646.7264 |
|         | 653.5682 | 645.8867 |         | 714.2918 | 656.8561 |         | 610.5425 | 1035.581 |
|         | 825.8972 | 642.7172 |         | 781.8603 | 624.3141 |         | 618.3533 | 609.2905 |
|         | 840.1049 |          |         | 905.2711 |          |         | 1083.332 |          |
| 350.802 | 855.705  | 641.8829 | 348.902 | 899.185  | 624.447  | 347.002 | 1129.2   | 657.2537 |
|         | 655.9668 | 645.1262 |         | 702.1214 | 661.9366 |         | 609.692  | 1061.966 |
|         | 840.2135 | 641.6832 |         | 765.418  | 623.4496 |         | 616.4188 | 608.6279 |
|         | 858.1396 |          |         | 883.574  |          |         | 1119.446 |          |
| 350.702 | 864.675  | 640.8655 | 348.802 | 867.2    | 623.7161 | 346.902 | 1189.67  | 670.3856 |
|         | 659.3703 | 644.4036 |         | 689.7457 | 668.1785 |         | 608.9034 | 1085.404 |
|         | 853.7976 | 640.6524 |         | 749.4511 | 622.5942 |         | 614.7252 | 607.9893 |
|         | 876.4799 |          |         | 863.3088 |          |         | 1155.45  |          |
| 350.602 | 853.82   | 639.853  | 348.702 | 865.545  | 623.0157 | 346.802 | 1216.635 | 686.2186 |
|         | 663.938  | 643.7256 |         | 677.7673 | 675.7461 |         | 608.1703 | 1105.22  |
|         | 866.294  | 639.6251 |         | 734.1773 | 621.7465 |         | 613.2327 | 607.3778 |
|         | 894.9351 |          |         | 845.4669 |          |         | 1190.708 |          |
| 350.502 | 874.165  | 638.8453 | 348.602 | 847.29   | 622.3516 | 346.702 | 1259.955 | 704.6436 |
|         | 669.7994 | 643.0985 |         | 666.6606 | 684.8018 |         | 607.4875 | 1120.862 |
|         | 877.3085 | 638.6013 |         | 719.791  | 620.9065 |         | 611.9143 | 606.7948 |
|         | 913.2479 |          |         | 830.8853 |          |         | 1224.523 |          |
| 350.402 | 901.425  | 637.8438 | 348.502 | 818.165  | 621.7313 | 346.602 | 1268.865 | 725.263  |
|         | 677.0024 | 642.5347 |         | 656.7147 | 695.5767 |         | 606.8523 | 1131.699 |
|         | 886.5031 | 637.582  |         | 706.4185 | 620.0737 |         | 610.7454 | 606.2427 |
|         | 931.138  |          |         | 820.2201 |          |         | 1255.832 |          |
| 350.302 | 934.26   | 636.8501 | 348.402 | 814.825  | 621.1637 | 346.502 | 1295.395 | 747.3643 |
|         | 685.4932 | 642.0455 |         | 648.0978 | 708.1989 |         | 606.2618 | 1137.491 |
|         | 893.6023 | 636.5688 |         | 694.1247 | 619.2468 |         | 609.7037 | 605.7219 |
|         | 948.2846 |          |         | 813.8448 |          |         | 1283.655 |          |
| 350.202 | 942.315  | 635.8663 | 348.302 | 822.64   | 620.6649 | 346.402 | 1315.96  | 769.9236 |
|         | 695.0736 | 641.6469 |         | 640.8104 | 722.8303 |         | 605.7147 | 1138.032 |
|         | 898.2918 | 635.5635 |         | 682.9773 | 618.4257 |         | 608.7757 | 605.2339 |
|         | 964.1882 |          |         | 812.0055 |          |         | 1306.745 |          |
| 350.102 | 926.415  | 634.8933 | 348.202 | 823.79   | 620.2554 | 346.302 | 1334.82  | 791.6595 |
|         | 705.3879 | 641.3588 |         | 634.7919 | 739.6409 |         | 605.2102 | 1133.177 |
|         | 900.4513 | 634.5667 |         | 672.9504 | 617.6112 |         | 607.9466 | 604.78   |
|         | 978.3913 |          |         | 814.805  |          |         | 1323.653 |          |
| 350.002 | 964.525  | 633.9309 | 348.102 | 810.16   | 619.9672 | 346.202 | 1349.14  | 811.1359 |
|         | 715.9227 | 641.1992 |         | 629.887  | 758.6588 |         | 604.7477 | 1123.208 |
|         | 899.9771 | 633.5779 |         | 664.0121 | 616.8034 |         | 607.2061 | 604.361  |
|         | 990.2963 |          |         | 822.1148 |          |         | 1333.214 |          |
| 349.902 | 1001.415 | 632.9814 | 348.002 | 828.51   | 619.8391 | 346.102 | 1328.77  | 826.9358 |
|         | 726.0388 | 641.1982 |         | 625.9361 | 779.9446 |         | 604.3269 | 1108.354 |
|         | 896.7973 | 632.599  |         | 656.1299 | 616.0019 |         | 606.5468 | 603.9779 |
|         | 999.2186 |          |         | 833.844  |          |         | 1334.23  |          |
| 349.802 | 990.78   | 632.0474 | 347.902 | 852.71   | 619.9335 | 346.002 | 1306.705 | 837.7818 |
|         | 735.0196 | 641.3902 |         | 622.7553 | 803.4572 |         | 603.9458 | 1089.054 |
|         | 891.0554 | 631.6322 |         | 649.2025 | 615.2078 |         | 605.959  | 603.6296 |
|         | 1004.616 |          |         | 849.7252 |          |         | 1325.851 |          |
| 349.702 | 983.87   | 631.129  | 347.802 | 880.31   | 620.3298 | 345.902 | 1295.17  | 842.7918 |
|         | 742.156  | 641.8111 |         | 620.1889 | 829.0345 |         | 603.6027 | 1065.951 |
|         | 882.865  | 630.6771 |         | 643.1597 | 614.4224 |         | 605.4359 | 603.3153 |
|         | 1005.93  |          |         | 869.4457 |          |         | 1307.835 |          |
| 349.602 | 970.635  | 630.2267 | 347.702 | 918.915  | 621.1471 | 345.802 | 1307.1   | 841.4766 |
|         | 746.8097 | 642.5158 |         | 618.092  | 856.5027 |         | 603.2966 | 1039.63  |
|         | 872.4455 | 629.7336 |         | 637.9161 | 613.6473 |         | 604.9722 | 603.0345 |
|         | 1002.797 |          |         | 892.716  |          |         | 1280.272 |          |

|         |          |          |         |          |          |         |          |          |
|---------|----------|----------|---------|----------|----------|---------|----------|----------|
| 345.702 | 1259.29  | 833.9735 | 343.802 | 626.6    | 605.9084 | 341.902 | 575.005  | 575.4093 |
|         | 603.0274 | 1010.868 |         | 601.5604 | 630.7992 |         | 575.0313 | 578.0176 |
|         | 604.564  | 602.7877 |         | 602      | 601.4946 |         | 575.2185 | 575.005  |
|         | 1244.07  |          |         | 635.7841 |          |         | 578.6618 |          |
| 345.602 | 1226.745 | 820.8324 | 343.702 | 633.45   | 605.0943 | 341.802 | 599.605  | 599.9777 |
|         | 602.7927 | 980.4202 |         | 601.5539 | 626.3578 |         | 599.6303 | 602.39   |
|         | 604.2063 | 602.5728 |         | 601.972  | 601.4924 |         | 599.8103 | 599.605  |
|         | 1200.533 |          |         | 630.5008 |          |         | 602.9933 |          |
| 345.502 | 1155.965 | 803.1423 | 343.602 | 612.59   | 604.4747 | 341.702 | 577.06   | 577.4043 |
|         | 602.5904 | 948.9945 |         | 601.5496 | 622.679  |         | 577.0843 | 579.6411 |
|         | 603.8945 | 602.3882 |         | 601.9473 | 601.4918 |         | 577.2576 | 577.06   |
|         | 1151.457 |          |         | 626.1753 |          |         | 580.2073 |          |
| 345.402 | 1071.8   | 782.1859 | 343.502 | 603.235  | 603.9957 | 341.602 | 595.63   | 595.9487 |
|         | 602.4168 | 917.3229 |         | 601.547  | 619.6174 |         | 595.6533 | 598.0272 |
|         | 603.623  | 602.2305 |         | 601.9247 | 601.4917 |         | 595.8202 | 595.63   |
|         | 1098.857 |          |         | 622.6099 |          |         | 598.5595 |          |
| 345.302 | 1019.7   | 759.4391 | 343.402 | 588.65   | 590.7781 | 341.502 | 599.615  | 599.9107 |
|         | 602.2677 | 886.0322 |         | 588.7029 | 604.2318 |         | 599.6372 | 601.846  |
|         | 603.3861 | 602.0956 |         | 589.0621 | 588.65   |         | 599.7982 | 599.615  |
|         | 1044.838 |          |         | 606.8248 |          |         | 602.3472 |          |
| 345.202 | 991.835  | 736.2839 | 343.302 | 593.85   | 595.6781 | 341.402 | 603.47   | 603.7448 |
|         | 602.1403 | 855.6947 |         | 593.9004 | 607.3217 |         | 603.4914 | 605.5505 |
|         | 603.1795 | 601.9809 |         | 594.2424 | 593.85   |         | 603.6466 | 603.47   |
|         | 991.3557 |          |         | 609.5926 |          |         | 606.0233 |          |
| 345.102 | 926.94   | 713.9269 | 343.202 | 626.92   | 628.505  | 341.302 | 582.97   | 583.2259 |
|         | 602.0331 | 826.7469 |         | 626.9679 | 638.6298 |         | 582.9907 | 584.9135 |
|         | 603.0008 | 601.8853 |         | 627.294  | 626.92   |         | 583.1402 | 582.97   |
|         | 940.0518 |          |         | 640.6368 |          |         | 585.3603 |          |
| 345.002 | 873.09   | 693.3136 | 343.102 | 633.76   | 635.1454 | 341.202 | 581.32   | 581.5587 |
|         | 601.9429 | 799.5743 |         | 633.8054 | 643.999  |         | 581.3399 | 583.1387 |
|         | 602.8457 | 601.8054 |         | 634.1168 | 633.76   |         | 581.4842 | 581.32   |
|         | 892.26   |          |         | 645.7865 |          |         | 583.5615 |          |
| 344.902 | 835.45   | 675.0208 | 343.002 | 614.25   | 615.4693 | 341.102 | 621.965  | 622.188  |
|         | 601.8668 | 774.4284 |         | 614.2929 | 623.2555 |         | 621.9842 | 623.6697 |
|         | 602.7106 | 601.7388 |         | 614.5906 | 614.25   |         | 622.1283 | 621.965  |
|         | 848.8101 |          |         | 624.8583 |          |         | 624.0752 |          |
| 344.802 | 802.42   | 659.3856 | 342.902 | 601.2    | 602.2798 | 341.002 | 601.565  | 601.7737 |
|         | 601.8029 | 751.4393 |         | 601.2405 | 609.1637 |         | 601.5835 | 603.1652 |
|         | 602.5929 | 601.6835 |         | 601.5254 | 601.2    |         | 601.7225 | 601.565  |
|         | 810.1701 |          |         | 610.6094 |          |         | 603.5498 |          |
| 344.702 | 782.815  | 646.4073 | 342.802 | 622.385  | 623.3465 | 340.902 | 581.055  | 581.2505 |
|         | 601.7496 | 730.7411 |         | 622.4239 | 629.4685 |         | 581.0728 | 582.5593 |
|         | 602.4904 | 601.6381 |         | 622.6961 | 622.385  |         | 581.2067 | 581.055  |
|         | 776.4742 |          |         | 630.7799 |          |         | 582.9244 |          |
| 344.602 | 767.795  | 635.9628 | 342.702 | 617.97   | 618.8304 | 340.802 | 613.27   | 613.4535 |
|         | 601.7057 | 712.2798 |         | 618.0074 | 624.3032 |         | 613.2871 | 614.6861 |
|         | 602.4015 | 601.6014 |         | 618.2676 | 617.97   |         | 613.4159 | 613.27   |
|         | 747.5456 |          |         | 625.4986 |          |         | 615.0327 |          |
| 344.502 | 733.67   | 627.7401 | 342.602 | 579.895  | 580.6684 | 340.702 | 604.58   | 604.7524 |
|         | 601.6706 | 695.9901 |         | 579.9308 | 585.5852 |         | 604.5965 | 605.9148 |
|         | 602.325  | 601.5729 |         | 580.1799 | 579.895  |         | 604.7201 | 604.58   |
|         | 723.0073 |          |         | 586.6792 |          |         | 606.2438 |          |
| 344.402 | 709.99   | 621.4192 | 342.502 | 580.55   | 581.248  | 340.602 | 610.27   | 610.4322 |
|         | 601.6425 | 681.8067 |         | 580.5842 | 585.6879 |         | 610.286  | 611.5298 |
|         | 602.2588 | 601.5508 |         | 580.8229 | 580.55   |         | 610.4044 | 610.27   |
|         | 702.4749 |          |         | 586.6931 |          |         | 611.8423 |          |
| 344.302 | 693.88   | 616.6291 | 342.402 | 573.715  | 574.3473 | 340.502 | 602.245  | 602.3978 |
|         | 601.6202 | 669.5233 |         | 573.7477 | 578.3737 |         | 602.2605 | 603.4353 |
|         | 602.2013 | 601.534  |         | 573.9766 | 573.715  |         | 602.3743 | 602.245  |
|         | 685.3721 |          |         | 579.3003 |          |         | 603.7329 |          |
| 344.202 | 650.365  | 613.0546 | 342.302 | 591.215  | 591.7898 | 340.402 | 578.11   | 578.2541 |
|         | 601.6028 | 658.9962 |         | 591.2461 | 595.4561 |         | 578.125  | 579.236  |
|         | 602.1515 | 601.5217 |         | 591.4659 | 591.215  |         | 578.2359 | 578.11   |
|         | 671.2402 |          |         | 596.3129 |          |         | 579.521  |          |
| 344.102 | 639.86   | 610.4011 | 342.202 | 617.225  | 617.7492 | 340.302 | 591.55   | 591.69   |
|         | 601.5882 | 650.0494 |         | 617.2546 | 621.1004 |         | 591.5645 | 592.6163 |
|         | 602.1069 | 601.5117 |         | 617.4658 | 617.225  |         | 591.6725 | 591.55   |
|         | 659.6103 |          |         | 621.8949 |          |         | 592.8933 |          |
| 344.002 | 649.35   | 608.4413 | 342.102 | 603.98   | 604.4594 | 340.202 | 622.15   | 622.2816 |
|         | 601.5758 | 642.4723 |         | 604.0084 | 607.5326 |         | 622.164  | 623.1608 |
|         | 602.0667 | 601.5037 |         | 604.2112 | 603.98   |         | 622.2691 | 622.15   |
|         | 650.045  |          |         | 608.2716 |          |         | 623.4254 |          |
| 343.902 | 648.33   | 606.9892 | 342.002 | 589.77   | 590.2097 | 340.102 | 621.155  | 621.2781 |
|         | 601.568  | 636.1168 |         | 589.7974 | 593.037  |         | 621.1685 | 622.1142 |
|         | 602.0311 | 601.498  |         | 589.9921 | 589.77   |         | 621.2707 | 621.155  |
|         | 642.2111 |          |         | 593.7261 |          |         | 622.3665 |          |



|             |          |          |         |          |          |         |          |          |
|-------------|----------|----------|---------|----------|----------|---------|----------|----------|
| 340.002     | 600.45   | 600.5657 | 141.302 | 447.3505 | 447.3525 | 139.402 | 455.483  | 455.4878 |
|             | 600.463  | 601.361  |         | 447.3519 | 447.363  |         | 455.4869 | 455.5088 |
|             | 600.5623 | 600.45   |         | 447.3589 | 447.3505 |         | 455.5021 | 455.483  |
|             | 601.6021 |          |         | 447.3748 |          |         | 455.5366 |          |
| 339.902     | 602.095  | 602.2057 | 141.202 | 471.8185 | 471.8206 | 139.302 | 461.7075 | 461.7126 |
|             | 602.1076 | 602.9611 |         | 471.82   | 471.8314 |         | 461.7117 | 461.7345 |
|             | 602.2039 | 602.095  |         | 471.8272 | 471.8185 |         | 461.7276 | 461.7075 |
|             | 603.1934 |          |         | 471.8436 |          |         | 461.7639 |          |
| 339.802     | 606.59   | 606.6958 | 141.102 | 459.019  | 459.0211 | 139.202 | 448.0975 | 448.1029 |
|             | 606.6022 | 607.4141 |         | 459.0206 | 459.0323 |         | 448.102  | 448.1258 |
|             | 606.6955 | 606.59   |         | 459.028  | 459.019  |         | 448.1186 | 448.0975 |
|             | 607.6377 |          |         | 459.045  |          |         | 448.1568 |          |
| 339.702     | 604.71   | 604.8108 | 141.002 | 446.144  | 446.1462 | 139.102 | 456.0225 | 456.0281 |
|             | 604.7219 | 605.4949 |         | 446.1456 | 446.1577 |         | 456.0273 | 456.0521 |
|             | 604.8122 | 604.71   |         | 446.1534 | 446.144  |         | 456.0446 | 456.0225 |
|             | 605.7097 |          |         | 446.171  |          |         | 456.0846 |          |
| 339.602     | 616.85   | 616.9458 | 140.902 | 463.331  | 463.3333 | 139.002 | 434.823  | 434.829  |
|             | 616.8615 | 617.5981 |         | 463.3327 | 463.3453 |         | 434.8281 | 434.8538 |
|             | 616.9488 | 616.85   |         | 463.3408 | 463.331  |         | 434.8461 | 434.823  |
|             | 617.8042 |          |         | 463.3592 |          |         | 434.888  |          |
| 339.502     | 617.345  | 617.4359 | 140.802 | 454.7515 | 454.7539 | 138.902 | 422.4525 | 422.4589 |
|             | 617.3561 | 618.0586 |         | 454.7533 | 454.7664 |         | 422.4579 | 422.4846 |
|             | 617.4404 | 617.345  |         | 454.7618 | 454.7515 |         | 422.4767 | 422.4525 |
|             | 618.2559 |          |         | 454.7809 |          |         | 422.5206 |          |
| 339.402     | 601.29   | 601.3759 | 140.702 | 445.1215 | 445.1241 | 138.802 | 450.502  | 450.5088 |
|             | 601.3008 | 601.9712 |         | 445.1234 | 445.1369 |         | 450.5079 | 450.5354 |
|             | 601.382  | 601.29   |         | 445.1322 | 445.1215 |         | 450.5279 | 450.502  |
|             | 602.1598 |          |         | 445.1521 |          |         | 450.574  |          |
| 339.302     | 614.845  | 614.9259 | 140.602 | 411.9195 | 411.9222 | 138.702 | 448.8645 | 448.8717 |
|             | 614.8554 | 615.4957 |         | 411.9215 | 411.9355 |         | 448.8709 | 448.8999 |
|             | 614.9341 | 614.845  |         | 411.9306 | 411.9195 |         | 448.8921 | 448.8645 |
|             | 615.6762 |          |         | 411.9512 |          |         | 448.9411 |          |
| 339.202     | 612.63   | 612.7078 | 140.502 | 449.716  | 449.7188 | 138.602 | 454.915  | 454.9226 |
|             | 612.6401 | 613.2521 |         | 449.7181 | 449.7326 |         | 454.9219 | 454.9524 |
|             | 612.717  | 612.63   |         | 449.7275 | 449.716  |         | 454.9443 | 454.915  |
|             | 613.427  |          |         | 449.7489 |          |         | 454.9962 |          |
| 339.102     | 591.39   | 591.4647 | 140.402 | 460.354  | 460.3569 | 138.502 | 458.695  | 458.7031 |
|             | 591.3998 | 591.9851 |         | 460.3562 | 460.3711 |         | 458.7024 | 458.7344 |
|             | 591.4749 | 591.39   |         | 460.3659 | 460.354  |         | 458.7251 | 458.695  |
|             | 592.1546 |          |         | 460.3882 |          |         | 458.7801 |          |
|             |          |          | 140.302 | 469.1205 | 469.1236 | 138.402 | 449.7565 | 449.7652 |
|             |          |          |         | 469.1228 | 469.1382 |         | 449.7644 | 449.7979 |
|             |          |          |         | 469.133  | 469.1205 |         | 449.7884 | 449.7565 |
|             |          |          |         | 469.1561 |          |         | 449.8465 |          |
| <b>P 2p</b> |          |          | 140.202 | 467.7295 | 467.7327 | 138.302 | 446.2645 | 446.2739 |
| 142.102     | 462.4125 | 462.414  |         | 467.732  | 467.748  |         | 446.2733 | 446.3079 |
|             | 462.4135 | 462.4221 |         | 467.7426 | 467.7295 |         | 446.2984 | 446.2645 |
|             | 462.4188 | 462.4125 |         | 467.7668 |          |         | 446.3599 |          |
|             | 462.4309 |          |         | 468.445  | 468.4483 | 138.202 | 449.6315 | 449.6415 |
| 142.002     | 459.224  | 459.2255 | 140.102 | 468.4476 | 468.4644 |         | 449.6411 | 449.6769 |
|             | 459.225  | 459.2339 |         | 468.4588 | 468.445  |         | 449.6675 | 449.6315 |
|             | 459.2305 | 459.224  |         | 468.4841 |          |         | 449.7325 |          |
|             | 459.243  |          |         | 451.417  | 451.4205 | 138.102 | 460.681  | 460.6916 |
| 141.902     | 461.8765 | 461.8781 | 140.002 | 451.4197 | 451.4372 |         | 460.6911 | 460.7284 |
|             | 461.8776 | 461.8867 |         | 451.4314 | 451.417  |         | 460.7193 | 460.681  |
|             | 461.8832 | 461.8765 |         | 451.4578 |          |         | 460.7874 |          |
|             | 461.8961 |          |         | 451.193  | 451.1967 | 138.002 | 453.7135 | 453.725  |
| 141.802     | 466.054  | 466.0556 | 139.902 | 451.1959 | 451.214  |         | 453.7246 | 453.7639 |
|             | 466.0551 | 466.0645 |         | 451.208  | 451.193  |         | 453.7542 | 453.7135 |
|             | 466.061  | 466.054  |         | 451.2356 |          |         | 453.8272 |          |
|             | 466.0743 |          |         | 457.642  | 457.6459 | 137.902 | 441.251  | 441.2634 |
| 141.702     | 470.9315 | 470.9332 | 139.802 | 457.6451 | 457.6638 |         | 441.2631 | 441.3048 |
|             | 470.9327 | 470.9424 |         | 457.6577 | 457.642  |         | 441.2944 | 441.251  |
|             | 470.9388 | 470.9315 |         | 457.6865 |          |         | 441.3729 |          |
|             | 470.9525 |          |         | 442.0205 | 442.0246 | 137.802 | 448.378  | 448.3914 |
| 141.602     | 457.7375 | 457.7393 | 139.702 | 442.0238 | 442.0432 |         | 448.3913 | 448.4353 |
|             | 457.7387 | 457.7488 |         | 442.0368 | 442.0205 |         | 448.4244 | 448.378  |
|             | 457.7451 | 457.7375 |         | 442.0668 |          |         | 448.5084 |          |
|             | 457.7593 |          |         | 450.485  | 450.4893 | 137.702 | 438.157  | 438.1714 |
| 141.502     | 451.519  | 451.5208 | 139.602 | 450.4885 | 450.5085 |         | 438.1717 | 438.2177 |
|             | 451.5203 | 451.5307 |         | 450.5021 | 450.485  |         | 438.2066 | 438.157  |
|             | 451.5268 | 451.519  |         | 450.5334 |          |         | 438.2964 |          |
|             | 451.5416 |          |         | 453.685  | 453.6895 | 137.602 | 444.719  | 444.7343 |
| 141.402     | 468.7035 | 468.7054 | 139.502 | 453.6887 | 453.7095 |         | 444.7353 | 444.7814 |
|             | 468.7049 | 468.7156 |         | 453.7031 | 453.685  |         | 444.7722 | 444.719  |
|             | 468.7116 | 468.7035 |         | 453.7359 |          |         | 444.8661 |          |
|             | 468.727  |          |         |          |          |         |          |          |

|         |          |          |         |          |          |         |          |          |
|---------|----------|----------|---------|----------|----------|---------|----------|----------|
| 137.502 | 449.636  | 449.6529 | 135.602 | 468.9795 | 469.1322 | 133.702 | 518.67   | 481.9097 |
|         | 449.6541 | 449.7021 |         | 469.7314 | 469.2546 |         | 453.9722 | 457.4534 |
|         | 449.693  | 449.636  |         | 469.3472 | 468.9795 |         | 476.235  | 450.734  |
|         | 449.7941 |          |         | 470.5269 |          |         | 517.3685 |          |
| 137.402 | 444.9795 | 444.998  | 135.502 | 443.048  | 443.2319 | 133.602 | 518.6    | 482.1403 |
|         | 444.9996 | 445.0497 |         | 444.1683 | 443.3518 |         | 452.7386 | 459.3521 |
|         | 445.0408 | 444.9795 |         | 443.4744 | 443.048  |         | 480.6437 | 450.5425 |
|         | 445.1497 |          |         | 445.0825 |          |         | 523.2471 |          |
| 137.302 | 470.16   | 470.1796 | 135.402 | 456.8185 | 457.0436 | 133.502 | 521.33   | 480.5763 |
|         | 470.1825 | 470.2346 |         | 458.5002 | 457.1553 |         | 451.823  | 461.9045 |
|         | 470.226  | 470.16   |         | 457.3181 | 456.8185 |         | 485.0867 | 450.356  |
|         | 470.3428 |          |         | 459.5617 |          |         | 528.3226 |          |
| 137.202 | 464.0065 | 464.0279 | 135.302 | 461.9785 | 462.2591 | 133.402 | 542.4    | 477.4637 |
|         | 464.0318 | 464.0859 |         | 464.4869 | 462.3535 |         | 451.1529 | 465.2428 |
|         | 464.0778 | 464.0065 |         | 462.5707 | 461.9785 |         | 489.3045 | 450.1746 |
|         | 464.2039 |          |         | 465.7347 |          |         | 532.6401 |          |
| 137.102 | 465.1295 | 465.1529 | 135.202 | 453.112  | 454.2789 | 133.302 | 530.845  | 473.297  |
|         | 465.1581 | 465.2142 |         | 457.591  | 454.3403 |         | 450.6604 | 469.5091 |
|         | 465.2066 | 465.1295 |         | 454.632  | 453.9208 |         | 493.0182 | 450.0002 |
|         | 465.3433 |          |         | 459.0796 |          |         | 536.4842 |          |
| 137.002 | 467.2125 | 467.2382 | 135.102 | 446.672  | 454.1724 | 133.202 | 542.84   | 468.6763 |
|         | 467.245  | 467.3029 |         | 458.9122 | 454.1738 |         | 450.2879 | 474.7923 |
|         | 467.296  | 467.2125 |         | 454.5684 | 453.7024 |         | 495.954  | 449.8317 |
|         | 467.4446 |          |         | 460.7197 |          |         | 540.2154 |          |
| 136.902 | 463.453  | 463.4813 | 135.002 | 472.573  | 454.1192 | 133.102 | 556.08   | 464.1612 |
|         | 463.4902 | 463.5496 |         | 460.5953 | 454.0155 |         | 449.9954 | 481.1435 |
|         | 463.5437 | 463.453  |         | 454.5525 | 453.4825 |         | 497.8693 | 449.6703 |
|         | 463.7058 |          |         | 462.835  |          |         | 544.1585 |          |
| 136.802 | 454.6445 | 454.6757 | 134.902 | 463.603  | 454.1549 | 133.002 | 554.435  | 460.1599 |
|         | 454.6873 | 454.7479 |         | 462.5419 | 453.8695 |         | 449.7564 | 488.5318 |
|         | 454.7433 | 454.6445 |         | 454.6055 | 453.2632 |         | 498.6118 | 449.517  |
|         | 454.9208 |          |         | 465.3823 |          |         | 548.5089 |          |
| 136.702 | 448.88   | 448.9146 | 134.802 | 467.2875 | 454.3322 | 132.902 | 537.695  | 456.8859 |
|         | 448.9297 | 448.9909 |         | 464.5537 | 453.7386 |         | 449.5537 | 496.8094 |
|         | 448.9879 | 448.88   |         | 454.7513 | 453.0438 |         | 498.0979 | 449.3717 |
|         | 449.1831 |          |         | 468.2444 |          |         | 553.2318 |          |
| 136.602 | 446.879  | 446.9175 | 134.702 | 480.9255 | 454.7317 | 132.802 | 539.41   | 454.3768 |
|         | 446.9371 | 446.9981 |         | 466.3546 | 453.6275 |         | 449.3755 | 505.7225 |
|         | 446.9972 | 446.879  |         | 455.0238 | 452.8247 |         | 496.3621 | 449.2331 |
|         | 447.2129 |          |         | 471.2636 |          |         | 558.1375 |          |
| 136.502 | 452.595  | 452.6381 | 134.602 | 477.8465 | 455.4658 | 132.702 | 566.93   | 452.5524 |
|         | 452.6637 | 452.7232 |         | 467.6445 | 453.5435 |         | 449.2155 | 514.8833 |
|         | 452.7248 | 452.595  |         | 455.4676 | 452.6069 |         | 493.5354 | 449.1015 |
|         | 452.9647 |          |         | 474.3006 |          |         | 562.8823 |          |
| 136.402 | 445.9915 | 446.0398 | 134.502 | 471.113  | 456.6726 | 132.602 | 555.355  | 451.2777 |
|         | 446.0736 | 446.1297 |         | 468.1711 | 453.4953 |         | 449.072  | 523.811  |
|         | 446.1346 | 445.9915 |         | 456.1331 | 452.3904 |         | 489.8201 | 448.9789 |
|         | 446.4032 |          |         | 477.301  |          |         | 567.0441 |          |
| 136.302 | 451.205  | 451.2595 | 134.402 | 491.3865 | 458.4978 | 132.502 | 580.73   | 450.4062 |
|         | 451.3045 | 451.3544 |         | 467.8019 | 453.4941 |         | 448.9417 | 531.9482 |
|         | 451.3632 | 451.205  |         | 457.0846 | 452.1745 |         | 485.4871 | 448.8645 |
|         | 451.6666 |          |         | 480.3548 |          |         | 570.1896 |          |
| 136.202 | 454.439  | 454.5008 | 134.302 | 480.3235 | 461.0571 | 132.402 | 596.415  | 449.8145 |
|         | 454.5616 | 454.6007 |         | 466.5663 | 453.5591 |         | 448.8253 | 538.7445 |
|         | 454.6147 | 454.439  |         | 458.3886 | 451.9611 |         | 480.8164 | 448.7605 |
|         | 454.9608 |          |         | 483.688  |          |         | 571.9194 |          |
| 136.102 | 461.2895 | 461.36   | 134.202 | 501.86   | 464.3742 | 132.302 | 590.335  | 449.4094 |
|         | 461.4437 | 461.465  |         | 464.6424 | 453.7122 |         | 448.723  | 543.6734 |
|         | 461.4855 | 461.2895 |         | 460.1132 | 451.7491 |         | 476.0828 | 448.6679 |
|         | 461.8856 |          |         | 487.5945 |          |         | 571.8849 |          |
| 136.002 | 457.2485 | 457.3294 | 134.102 | 489.506  | 468.3236 | 132.202 | 562.295  | 449.1254 |
|         | 457.4474 | 457.4394 |         | 462.3093 | 453.9881 |         | 448.6336 | 546.3563 |
|         | 457.4681 | 457.2485 |         | 462.3227 | 451.5405 |         | 471.5191 | 448.5864 |
|         | 457.9388 |          |         | 492.3221 |          |         | 569.8752 |          |
| 135.902 | 453.8255 | 453.919  | 134.002 | 490.61   | 472.5862 | 132.102 | 553.935  | 448.9185 |
|         | 454.0898 | 454.0338 |         | 459.8664 | 454.4311 |         | 448.5545 | 546.5672 |
|         | 454.0729 | 453.8255 |         | 465.0526 | 451.3343 |         | 467.3071 | 448.5137 |
|         | 454.639  |          |         | 497.9334 |          |         | 565.8061 |          |
| 135.802 | 476.31   | 476.419  | 133.902 | 502.33   | 476.6643 | 132.002 | 545.595  | 448.7626 |
|         | 476.6729 | 476.5378 |         | 457.5677 | 455.0994 |         | 448.4849 | 544.2664 |
|         | 476.5904 | 476.31   |         | 468.3169 | 451.1305 |         | 463.5609 | 448.4493 |
|         | 477.2901 |          |         | 504.2566 |          |         | 559.7267 |          |
| 135.702 | 465.308  | 465.4363 | 133.802 | 506.96   | 479.9603 | 131.902 | 542.835  | 448.6412 |
|         | 465.8228 | 465.5579 |         | 455.5797 | 456.0757 |         | 448.4237 | 539.6582 |
|         | 465.6278 | 465.308  |         | 472.0752 | 450.9303 |         | 460.343  | 448.3925 |
|         | 466.5209 |          |         | 510.9    |          |         | 551.8885 |          |

|         |          |          |         |          |          |         |          |          |
|---------|----------|----------|---------|----------|----------|---------|----------|----------|
| 131.802 | 545.155  | 448.5447 | 129.902 | 429.9365 | 448.1206 | 128.002 | 431.2915 | 431.2967 |
|         | 448.3706 | 533.0805 |         | 448.1063 | 449.4761 |         | 431.2932 | 431.4435 |
|         | 457.662  | 448.3431 |         | 448.3068 | 448.1013 |         | 431.3333 | 431.2915 |
|         | 542.6284 |          |         | 449.7059 |          |         | 431.4922 |          |
| 131.702 | 535.215  | 448.4675 | 129.802 | 455.21   | 455.2276 | 127.902 | 466.799  | 466.8039 |
|         | 448.3256 | 525.036  |         | 455.2147 | 456.3576 |         | 466.8006 | 466.9396 |
|         | 455.4862 | 448.3013 |         | 455.3939 | 455.21   |         | 466.8383 | 466.799  |
|         | 532.4113 |          |         | 456.5638 |          |         | 466.9854 |          |
| 131.602 | 536.68   | 448.4052 | 129.702 | 468.4405 | 468.4565 | 127.802 | 459.711  | 459.7157 |
|         | 448.288  | 516.0792 |         | 468.4449 | 469.4109 |         | 459.7125 | 459.8413 |
|         | 453.7671 | 448.2663 |         | 468.6058 | 468.4405 |         | 459.7479 | 459.711  |
|         | 521.7406 |          |         | 469.5965 |          |         | 459.8844 |          |
| 131.502 | 506.945  | 448.3557 | 129.602 | 485.2385 | 485.2533 | 127.702 | 455.255  | 455.2594 |
|         | 448.2576 | 506.7667 |         | 485.2426 | 486.0682 |         | 455.2565 | 455.3761 |
|         | 452.4331 | 448.2382 |         | 485.3877 | 485.2385 |         | 455.2897 | 455.255  |
|         | 511.0984 |          |         | 486.2363 |          |         | 455.4166 |          |
| 131.402 | 493.7215 | 448.3151 | 129.502 | 455.251  | 455.2648 | 127.602 | 448.8685 | 448.8727 |
|         | 448.2322 | 497.6021 |         | 455.2548 | 455.9677 |         | 448.8699 | 448.9811 |
|         | 451.4155 | 448.2147 |         | 455.3862 | 455.251  |         | 448.9012 | 448.8685 |
|         | 500.9205 |          |         | 456.1205 |          |         | 449.0194 |          |
| 131.302 | 505.305  | 448.2813 | 129.402 | 452.0075 | 452.0204 | 127.502 | 456.665  | 456.669  |
|         | 448.2106 | 488.9936 |         | 452.0111 | 452.6319 |         | 456.6663 | 456.77   |
|         | 450.6486 | 448.1948 |         | 452.1304 | 452.0075 |         | 456.6959 | 456.665  |
|         | 491.5495 |          |         | 452.7712 |          |         | 456.8062 |          |
| 131.202 | 482.9595 | 448.2545 | 129.302 | 445.3945 | 445.4064 | 127.402 | 431.2085 | 431.2123 |
|         | 448.1937 | 481.2281 |         | 445.3979 | 445.9425 |         | 431.2098 | 431.3065 |
|         | 450.0754 | 448.1794 |         | 445.5066 | 445.3945 |         | 431.2385 | 431.2085 |
|         | 483.2134 |          |         | 446.0699 |          |         | 431.3417 |          |
| 131.102 | 476.367  | 448.2324 | 129.202 | 462.892  | 462.9029 | 127.302 | 446.016  | 446.0196 |
|         | 448.1797 | 474.4666 |         | 462.8952 | 463.3761 |         | 446.0172 | 446.1077 |
|         | 449.6494 | 448.1667 |         | 462.9945 | 462.892  |         | 446.0443 | 446.016  |
|         | 476.0279 |          |         | 463.4928 |          |         | 446.1409 |          |
| 131.002 | 455.5595 | 448.214  | 129.102 | 474.9835 | 474.9937 | 127.202 | 448.7395 | 448.7429 |
|         | 448.168  | 468.7753 |         | 474.9865 | 475.4136 |         | 448.7407 | 448.8254 |
|         | 449.3312 | 448.1563 |         | 475.0775 | 474.9835 |         | 448.7661 | 448.7395 |
|         | 470.0197 |          |         | 475.5209 |          |         | 448.8566 |          |
| 130.902 | 449.6965 | 448.1974 | 129.002 | 459.7    | 459.7096 | 127.102 | 455.431  | 455.4343 |
|         | 448.1571 | 464.1098 |         | 459.7028 | 460.0842 |         | 455.4321 | 455.5116 |
|         | 449.0911 | 448.1463 |         | 459.7865 | 459.7    |         | 455.4559 | 455.431  |
|         | 465.1164 |          |         | 460.1831 |          |         | 455.5409 |          |
| 130.802 | 450.263  | 448.182  | 128.902 | 443.1465 | 443.1555 | 127.002 | 449.1585 | 449.1616 |
|         | 448.1464 | 460.3871 |         | 443.1492 | 443.4913 |         | 449.1596 | 449.2342 |
|         | 448.9077 | 448.1366 |         | 443.2262 | 443.1465 |         | 449.182  | 449.1585 |
|         | 461.2136 |          |         | 443.5827 |          |         | 449.2619 |          |
| 130.702 | 467.5655 | 448.1675 | 128.802 | 437.95   | 437.9584 | 126.902 | 443.1095 | 443.1125 |
|         | 448.1362 | 457.4794 |         | 437.9526 | 438.2607 |         | 443.1105 | 443.1807 |
|         | 448.7653 | 448.1269 |         | 438.0236 | 437.95   |         | 443.132  | 443.1095 |
|         | 458.1677 |          |         | 438.3453 |          |         | 443.2072 |          |
| 130.602 | 479.35   | 448.1552 | 128.702 | 439.903  | 439.9108 | 126.802 | 441.6705 | 441.6733 |
|         | 448.1273 | 455.2482 |         | 439.9054 | 440.1841 |         | 441.6715 | 441.7375 |
|         | 448.6546 | 448.1188 |         | 439.9712 | 439.903  |         | 441.692  | 441.6705 |
|         | 455.8289 |          |         | 440.2625 |          |         | 441.7629 |          |
| 130.502 | 470.921  | 448.1459 | 128.602 | 451.907  | 451.9144 | 126.702 | 460.0595 | 460.0622 |
|         | 448.1209 | 453.567  |         | 451.9093 | 452.1622 |         | 460.0605 | 460.1227 |
|         | 448.5683 | 448.1132 |         | 451.9703 | 451.907  |         | 460.08   | 460.0595 |
|         | 454.0626 |          |         | 452.2351 |          |         | 460.1469 |          |
| 130.402 | 461.037  | 448.1389 | 128.502 | 454.975  | 454.982  | 126.602 | 451.628  | 451.6306 |
|         | 448.1165 | 452.3085 |         | 454.9772 | 455.2074 |         | 451.6289 | 451.6876 |
|         | 448.5002 | 448.1093 |         | 455.0338 | 454.975  |         | 451.6475 | 451.628  |
|         | 452.7361 |          |         | 455.2754 |          |         | 451.7107 |          |
| 130.302 | 443.98   | 448.1334 | 128.402 | 449.9955 | 450.0021 | 126.502 | 464.8825 | 464.885  |
|         | 448.1132 | 451.3735 |         | 449.9976 | 450.2079 |         | 464.8834 | 464.9405 |
|         | 448.4453 | 448.1065 |         | 450.0502 | 449.9955 |         | 464.901  | 464.8825 |
|         | 451.7459 |          |         | 450.2712 |          |         | 464.9624 |          |
| 130.202 | 465.556  | 448.1281 | 128.302 | 447.722  | 447.7282 | 126.402 | 451.663  | 451.6654 |
|         | 448.1099 | 450.6783 |         | 447.724  | 447.9166 |         | 451.6639 | 451.7176 |
|         | 448.3997 | 448.1037 |         | 447.7731 | 447.722  |         | 451.6805 | 451.663  |
|         | 451.0051 |          |         | 447.9758 |          |         | 451.7384 |          |
| 130.102 | 455.5345 | 448.1245 | 128.202 | 451.8845 | 451.8903 | 126.302 | 444.725  | 444.7273 |
|         | 448.108  | 450.1599 |         | 451.8864 | 452.0633 |         | 444.7258 | 444.7762 |
|         | 448.3628 | 448.1022 |         | 451.9322 | 451.8845 |         | 444.7415 | 444.725  |
|         | 450.4485 |          |         | 452.1186 |          |         | 444.7958 |          |
| 130.002 | 459.1575 | 448.1217 | 128.102 | 449.896  | 449.9015 | 126.202 | 441.8135 | 441.8157 |
|         | 448.1066 | 449.7713 |         | 449.8978 | 450.0606 |         | 441.8143 | 441.8614 |
|         | 448.3321 | 448.1013 |         | 449.9407 | 449.896  |         | 441.8294 | 441.8135 |
|         | 450.0277 |          |         | 450.1125 |          |         | 441.8803 |          |

|         |          |          |         |          |          |         |          |          |
|---------|----------|----------|---------|----------|----------|---------|----------|----------|
| 126.102 | 468.0635 | 468.0656 | 124.202 | 462.7395 | 462.7405 | 297.378 | 336.134  | 336.2585 |
|         | 468.0643 | 468.1094 |         | 462.7399 | 462.759  |         | 336.1579 | 336.1346 |
|         | 468.0788 | 468.0635 |         | 462.7466 | 462.7395 |         | 336.1353 | 336.156  |
|         | 468.1275 |          |         | 462.7676 |          |         | 336.134  | 336.3063 |
| 126.002 | 456.213  | 456.215  | 124.102 | 453.639  | 453.64   | 297.278 | 349.6008 | 349.7339 |
|         | 456.2137 | 456.2569 |         | 453.6394 | 453.6577 |         | 349.6253 | 349.6014 |
|         | 456.2277 | 456.213  |         | 453.6458 | 453.639  |         | 349.6022 | 349.6235 |
|         | 456.2743 |          |         | 453.6659 |          |         | 349.6008 | 349.7831 |
| 125.902 | 448.167  | 448.1689 |         |          |          | 297.178 | 352.596  | 352.7384 |
|         | 448.1677 | 448.2089 |         |          |          |         | 352.6212 | 352.5966 |
|         | 448.181  | 448.167  |         |          |          |         | 352.5974 | 352.6195 |
|         | 448.2256 |          |         |          |          |         | 352.596  | 352.7891 |
| 125.802 | 457.9345 | 457.9364 |         |          |          | 297.078 | 325.7344 | 325.887  |
|         | 457.9352 | 457.9744 |         |          |          |         | 325.7603 | 325.735  |
|         | 457.9479 | 457.9345 |         |          |          |         | 325.7358 | 325.7588 |
|         | 457.9903 |          |         |          |          |         | 325.7344 | 325.9392 |
| 125.702 | 455.0725 | 455.0743 |         |          |          | 296.978 | 329.5396 | 329.7034 |
|         | 455.0732 | 455.1104 |         |          |          |         | 329.5662 | 329.5402 |
|         | 455.0853 | 455.0725 |         |          |          |         | 329.5411 | 329.5648 |
|         | 455.1256 |          |         |          |          |         | 329.5396 | 329.7572 |
| 125.602 | 451.7135 | 451.7152 |         |          |          | 296.878 | 342.3536 | 342.5297 |
|         | 451.7141 | 451.7494 |         |          |          |         | 342.3808 | 342.3542 |
|         | 451.7257 | 451.7135 |         |          |          |         | 342.3551 | 342.3797 |
|         | 451.7639 |          |         |          |          |         | 342.3536 | 342.5852 |
| 125.502 | 443.4625 | 443.4642 |         |          |          | 296.778 | 358.3692 | 358.5589 |
|         | 443.4631 | 443.4964 |         |          |          |         | 358.3971 | 358.3699 |
|         | 443.4742 | 443.4625 |         |          |          |         | 358.3707 | 358.3963 |
|         | 443.5103 |          |         |          |          |         | 358.3692 | 358.6161 |
| 125.402 | 461.3965 | 461.3981 |         |          |          | 296.678 | 346.3096 | 346.5144 |
|         | 461.3971 | 461.4288 |         |          |          |         | 346.3382 | 346.3103 |
|         | 461.4078 | 461.3965 |         |          |          |         | 346.3111 | 346.3377 |
|         | 461.4423 |          |         |          |          |         | 346.3096 | 346.5733 |
| 125.302 | 454.3425 | 454.344  |         |          |          | 296.578 | 333.6108 | 333.8323 |
|         | 454.3431 | 454.3736 |         |          |          |         | 333.6401 | 333.6115 |
|         | 454.3533 | 454.3425 |         |          |          |         | 333.6124 | 333.6399 |
|         | 454.3865 |          |         |          |          |         | 333.6108 | 333.893  |
| 125.202 | 468.3375 | 468.339  |         |          |          | 296.478 | 338.1592 | 338.3994 |
|         | 468.3381 | 468.3673 |         |          |          |         | 338.1891 | 338.1599 |
|         | 468.3479 | 468.3375 |         |          |          |         | 338.1608 | 338.1894 |
|         | 468.3798 |          |         |          |          |         | 338.1592 | 338.4619 |
| 125.102 | 457.272  | 457.2734 |         |          |          | 296.378 | 358.1688 | 358.4298 |
|         | 457.2725 | 457.3006 |         |          |          |         | 358.1994 | 358.1696 |
|         | 457.282  | 457.272  |         |          |          |         | 358.1705 | 358.2002 |
|         | 457.3126 |          |         |          |          |         | 358.1688 | 358.4942 |
| 125.002 | 453.1705 | 453.1719 |         |          |          | 296.278 | 349.7216 | 350.0059 |
|         | 453.171  | 453.1978 |         |          |          |         | 349.753  | 349.7224 |
|         | 453.1801 | 453.1705 |         |          |          |         | 349.7233 | 349.7542 |
|         | 453.2093 |          |         |          |          |         | 349.7216 | 350.0724 |
| 124.902 | 468.647  | 468.6483 |         |          |          | 296.178 | 353.2348 | 353.5453 |
|         | 468.6475 | 468.6731 |         |          |          |         | 353.2672 | 353.2356 |
|         | 468.6562 | 468.647  |         |          |          |         | 353.2365 | 353.2687 |
|         | 468.6841 |          |         |          |          |         | 353.2348 | 353.6142 |
| 124.802 | 468.969  | 468.9703 |         |          |          | 296.078 | 364.8096 | 365.1497 |
|         | 468.9695 | 468.9938 |         |          |          |         | 364.8431 | 364.8104 |
|         | 468.9778 | 468.969  |         |          |          |         | 364.8114 | 364.8449 |
|         | 469.0044 |          |         |          |          |         | 364.8096 | 365.2211 |
| 124.702 | 439.957  | 439.9582 |         |          |          | 295.978 | 337.7252 | 338.0989 |
|         | 439.9575 | 439.9807 |         |          |          |         | 337.7597 | 337.7261 |
|         | 439.9655 | 439.957  |         |          |          |         | 337.727  | 337.7619 |
|         | 439.9909 |          |         |          |          |         | 337.7252 | 338.1728 |
| 124.602 | 440.943  | 440.9442 |         |          |          | 295.878 | 323.8548 | 324.2667 |
|         | 440.9435 | 440.9658 |         |          |          |         | 323.8903 | 323.8557 |
|         | 440.9512 | 440.943  |         |          |          |         | 323.8567 | 323.893  |
|         | 440.9757 |          |         |          |          |         | 323.8548 | 324.3432 |
| 124.502 | 447.5895 | 447.5907 |         |          |          | 295.778 | 339.168  | 339.6237 |
|         | 447.5899 | 447.6115 |         |          |          |         | 339.2045 | 339.1689 |
|         | 447.5975 | 447.5895 |         |          |          |         | 339.1699 | 339.2078 |
|         | 447.6211 |          |         |          |          |         | 339.168  | 339.7028 |
| 124.402 | 446.3495 | 446.3506 |         |          |          | 295.678 | 338.5536 | 339.0596 |
|         | 446.3499 | 446.3707 |         |          |          |         | 338.5911 | 338.5546 |
|         | 446.3572 | 446.3495 |         |          |          |         | 338.5555 | 338.5951 |
|         | 446.3799 |          |         |          |          |         | 338.5536 | 339.1415 |
| 124.302 | 454.2515 | 454.2526 |         |          |          | 295.578 | 368.5792 | 369.1435 |
|         | 454.2519 | 454.2719 |         |          |          |         | 368.6178 | 368.5802 |
|         | 454.2589 | 454.2515 |         |          |          |         | 368.5812 | 368.6225 |
|         | 454.2808 |          |         |          |          |         | 368.5792 | 369.2283 |

**C 1s**

|         |          |          |         |          |          |         |          |          |
|---------|----------|----------|---------|----------|----------|---------|----------|----------|
| 295.478 | 358.0564 | 358.6886 | 293.578 | 391.9784 | 385.6134 | 291.678 | 418.772  | 413.156  |
|         | 358.096  | 358.0574 |         | 350.1386 | 350.068  |         | 349.4476 | 349.3039 |
|         | 358.0584 | 358.1016 |         | 350.0691 | 350.1847 |         | 349.3034 | 349.8688 |
|         | 358.0564 | 358.7764 |         | 350.0658 | 385.8106 |         | 349.2977 | 413.8891 |
| 295.378 | 348.758  | 349.4699 | 293.478 | 384.7096 | 396.4577 | 291.578 | 400.952  | 399.2996 |
|         | 348.7986 | 348.7591 |         | 350.0736 | 350.0003 |         | 349.4489 | 349.2986 |
|         | 348.7601 | 348.8052 |         | 350.0014 | 350.1245 |         | 349.2979 | 349.9347 |
|         | 348.758  | 349.5608 |         | 349.998  | 396.6654 |         | 349.292  | 400.1119 |
| 295.278 | 354.3724 | 355.1785 | 293.378 | 399.528  | 409.5894 | 291.478 | 392.7052 | 387.7308 |
|         | 354.414  | 354.3735 |         | 350.0094 | 349.9334 |         | 349.452  | 349.2948 |
|         | 354.3745 | 354.4217 |         | 349.9345 | 350.0658 |         | 349.2939 | 350.0143 |
|         | 354.3724 | 355.2727 |         | 349.931  | 409.8084 |         | 349.2877 | 388.6351 |
| 295.178 | 346.9304 | 347.849  | 293.278 | 411.752  | 424.8933 | 291.378 | 366.984  | 378.3984 |
|         | 346.973  | 346.9315 |         | 349.9441 | 349.8678 |         | 349.4567 | 349.2922 |
|         | 346.9326 | 346.982  |         | 349.8688 | 350.009  |         | 349.291  | 350.1099 |
|         | 346.9304 | 347.9465 |         | 349.8652 | 425.122  |         | 349.2846 | 379.4099 |
| 295.078 | 350.548  | 351.6023 | 293.178 | 440.972  | 441.9779 | 291.278 | 359.29   | 371.0955 |
|         | 350.5921 | 350.5492 |         | 349.8827 | 349.8036 |         | 349.4625 | 349.29   |
|         | 350.5502 | 350.602  |         | 349.8046 | 349.9547 |         | 349.2886 | 350.2238 |
|         | 350.548  | 351.7037 |         | 349.801  | 442.2197 |         | 349.2819 | 372.2326 |
| 294.978 | 343.6108 | 344.8308 | 293.078 | 454.064  | 460.1336 | 291.178 | 359.3852 | 365.5279 |
|         | 343.6565 | 343.612  |         | 349.8239 | 349.7419 |         | 349.4691 | 349.2883 |
|         | 343.6131 | 343.6673 |         | 349.7428 | 349.9036 |         | 349.2864 | 350.359  |
|         | 343.6108 | 344.9365 |         | 349.7391 | 460.3895 |         | 349.2796 | 366.8123 |
| 294.878 | 360.2344 | 361.6597 | 292.978 | 494.28   | 478.3513 | 291.078 | 369.804  | 361.373  |
|         | 360.2817 | 360.2357 |         | 349.768  | 349.6829 |         | 349.4766 | 349.287  |
|         | 360.2367 | 360.2936 |         | 349.6838 | 349.8565 |         | 349.2846 | 350.5196 |
|         | 360.2344 | 361.7699 |         | 349.6799 | 478.6227 |         | 349.2775 | 362.8307 |
| 294.778 | 355.954  | 357.638  | 292.878 | 485.676  | 495.4013 | 290.978 | 367.8464 | 358.3225 |
|         | 356.0029 | 355.9553 |         | 349.7161 | 349.6277 |         | 349.4853 | 349.2863 |
|         | 355.9564 | 356.0161 |         | 349.6286 | 349.8144 |         | 349.2833 | 350.7104 |
|         | 355.954  | 357.7528 |         | 349.6246 | 495.6895 |         | 349.276  | 359.9838 |
| 294.678 | 349.5184 | 352.8529 | 292.778 | 533.52   | 509.9572 | 290.878 | 372.8532 | 356.1063 |
|         | 350.8876 | 350.8384 |         | 349.668  | 349.5763 |         | 349.4952 | 349.2858 |
|         | 350.8395 | 350.9023 |         | 349.577  | 349.7775 |         | 349.2825 | 350.9366 |
|         | 350.8371 | 352.9725 |         | 349.573  | 510.264  |         | 349.275  | 358.0065 |
| 294.578 | 347.0388 | 353.2159 | 292.678 | 543.096  | 520.7698 | 290.778 | 358.6684 | 354.5039 |
|         | 350.8191 | 350.7683 |         | 349.625  | 349.5297 |         | 349.5066 | 349.2863 |
|         | 350.7694 | 350.8355 |         | 349.5305 | 349.7471 |         | 349.2824 | 351.2042 |
|         | 350.7669 | 353.3406 |         | 349.5263 | 521.097  |         | 349.2746 | 356.6849 |
| 294.478 | 354.7532 | 353.7206 | 292.578 | 523.976  | 526.8447 | 290.678 | 338.6524 | 353.3439 |
|         | 350.7502 | 350.6979 |         | 349.5875 | 349.4885 |         | 349.519  | 349.2872 |
|         | 350.699  | 350.7685 |         | 349.4892 | 349.7239 |         | 349.2827 | 351.5193 |
|         | 350.6964 | 353.8506 |         | 349.4848 | 527.1945 |         | 349.2745 | 355.8541 |
| 294.378 | 368.5804 | 354.4253 | 292.478 | 495.94   | 527.5979 | 290.578 | 353.2548 | 352.4973 |
|         | 350.6811 | 350.6272 |         | 349.5549 | 349.4519 |         | 349.5325 | 349.2882 |
|         | 350.6283 | 350.7015 |         | 349.4526 | 349.7077 |         | 349.2829 | 351.8887 |
|         | 350.6256 | 354.5608 |         | 349.4481 | 527.9727 |         | 349.2744 | 355.392  |
| 294.278 | 361.5836 | 355.4136 | 292.378 | 514.648  | 522.9473 | 290.478 | 355.916  | 351.9703 |
|         | 350.6121 | 350.5567 |         | 349.5265 | 349.4193 |         | 349.6455 | 349.3879 |
|         | 350.5578 | 350.635  |         | 349.4199 | 349.698  |         | 349.3818 | 352.4186 |
|         | 350.5551 | 355.5549 |         | 349.4153 | 523.35   |         | 349.3729 | 355.3125 |
| 294.178 | 351.104  | 356.8019 | 292.278 | 517.624  | 513.3281 | 290.378 | 376.006  | 351.0885 |
|         | 350.5432 | 350.4862 |         | 349.5028 | 349.3912 |         | 349.2486 | 348.9766 |
|         | 350.4873 | 350.5688 |         | 349.3918 | 349.6959 |         | 348.9695 | 352.5072 |
|         | 350.4845 | 356.9495 |         | 349.387  | 513.762  |         | 348.9602 | 354.9494 |
| 294.078 | 371.8664 | 358.7481 | 292.178 | 499.832  | 499.6475 | 290.278 | 363.4696 | 350.3185 |
|         | 350.474  | 350.4154 |         | 349.484  | 349.3678 |         | 348.853  | 348.5657 |
|         | 350.4165 | 350.5027 |         | 349.3682 | 349.702  |         | 348.5573 | 352.6737 |
|         | 350.4137 | 358.902  |         | 349.3632 | 500.1165 |         | 348.5477 | 354.7774 |
| 293.978 | 390.2852 | 361.4612 | 292.078 | 480.052  | 483.1011 | 290.178 | 353.8696 | 349.6276 |
|         | 350.4051 | 350.345  |         | 349.4695 | 349.3485 |         | 348.4577 | 348.1538 |
|         | 350.3461 | 350.4372 |         | 349.3487 | 349.7165 |         | 348.144  | 352.9248 |
|         | 350.3431 | 361.6221 |         | 349.3436 | 483.6099 |         | 348.1341 | 354.7717 |
| 293.878 | 364.1532 | 365.198  | 291.978 | 480.268  | 465.0114 | 290.078 | 359.022  | 348.9928 |
|         | 350.338  | 350.2754 |         | 349.4589 | 349.3327 |         | 348.0619 | 347.7401 |
|         | 350.2765 | 350.3731 |         | 349.3327 | 349.7397 |         | 347.7286 | 353.267  |
|         | 350.2735 | 365.367  |         | 349.3275 | 465.5654 |         | 347.7184 | 354.9171 |
| 293.778 | 362.9844 | 370.2565 | 291.878 | 451.836  | 446.6517 | 289.978 | 344.0348 | 348.3996 |
|         | 350.2712 | 350.206  |         | 349.4522 | 349.3204 |         | 347.6664 | 347.3253 |
|         | 350.207  | 350.3095 |         | 349.3203 | 349.7724 |         | 347.3118 | 353.7076 |
|         | 350.204  | 370.4344 |         | 349.315  | 447.2573 |         | 347.3012 | 355.2059 |
| 293.678 | 381.248  | 376.959  | 291.778 | 427.984  | 429.1012 | 289.878 | 338.1316 | 347.8359 |
|         | 350.2046 | 350.1367 |         | 349.4486 | 349.311  |         | 347.2698 | 346.9078 |
|         | 350.1377 | 350.2465 |         | 349.3108 | 349.8152 |         | 346.892  | 354.2501 |
|         | 350.1346 | 377.1463 |         | 349.3052 | 429.7659 |         | 346.8811 | 355.6314 |

|         |          |          |         |          |          |         |          |          |
|---------|----------|----------|---------|----------|----------|---------|----------|----------|
| 289.778 | 357.112  | 347.2937 | 287.878 | 379.5864 | 338.4707 | 285.978 | 380.9868 | 330.8957 |
|         | 346.8718 | 346.4872 |         | 340.5718 | 339.991  |         | 374.5343 | 334.5288 |
|         | 346.469  | 354.8976 |         | 338.354  | 370.1775 |         | 330.9551 | 338.3068 |
|         | 346.4574 | 356.1896 |         | 338.3255 | 374.2629 |         | 330.8457 | 385.838  |
| 289.678 | 357.472  | 346.7695 | 287.778 | 373.0224 | 338.0434 | 285.878 | 385.222  | 330.5363 |
|         | 346.4747 | 346.0657 |         | 340.4677 | 340.2979 |         | 380.4037 | 333.0995 |
|         | 346.0444 | 355.6532 |         | 337.9378 | 369.5115 |         | 330.6089 | 336.9775 |
|         | 346.0323 | 356.8784 |         | 337.9077 | 374.6274 |         | 330.4887 | 389.671  |
| 289.578 | 359.1584 | 346.2595 | 287.678 | 372.6524 | 337.6186 | 285.778 | 408.38   | 330.1815 |
|         | 346.0788 | 345.6434 |         | 340.4274 | 340.8785 |         | 386.7405 | 331.9604 |
|         | 345.6185 | 356.5153 |         | 337.5236 | 368.5939 |         | 330.269  | 335.7584 |
|         | 345.6058 | 357.6925 |         | 337.4917 | 375.0753 |         | 330.1365 | 394.3638 |
| 289.478 | 366.6028 | 345.7609 | 287.578 | 354.4464 | 337.1964 | 285.678 | 396.824  | 329.8343 |
|         | 345.685  | 345.2207 |         | 340.4631 | 341.7759 |         | 393.4676 | 331.0588 |
|         | 345.1915 | 357.4794 |         | 337.1113 | 367.4376 |         | 329.9381 | 334.6468 |
|         | 345.1782 | 358.6248 |         | 337.0774 | 375.6745 |         | 329.7915 | 399.7797 |
| 289.378 | 362.6752 | 345.2722 | 287.478 | 369.1528 | 336.7748 | 285.578 | 394.7632 | 329.4938 |
|         | 345.2942 | 344.7986 |         | 340.5892 | 343.001  |         | 400.4953 | 330.3371 |
|         | 344.7638 | 358.5377 |         | 336.6992 | 366.0598 |         | 329.6157 | 333.6351 |
|         | 344.7503 | 359.6654 |         | 336.6632 | 376.4711 |         | 329.4526 | 405.7665 |
| 289.278 | 348.4404 | 344.7912 | 287.378 | 384.052  | 336.3586 | 285.478 | 410.56   | 329.1593 |
|         | 344.9067 | 344.3771 |         | 340.8289 | 344.5182 |         | 407.6939 | 329.7455 |
|         | 344.336  | 359.6774 |         | 336.2889 | 364.4859 |         | 329.3019 | 332.7158 |
|         | 344.3218 | 360.8012 |         | 336.2506 | 377.4782 |         | 329.1197 | 412.1374 |
| 289.178 | 362.818  | 344.3151 | 287.278 | 386.2296 | 335.9426 | 285.378 | 425.652  | 328.8325 |
|         | 344.5216 | 343.9551 |         | 341.2039 | 346.2249 |         | 414.9232 | 329.247  |
|         | 343.9061 | 360.8805 |         | 335.882  | 362.7458 |         | 328.9993 | 331.8828 |
|         | 343.8913 | 362.0134 |         | 335.8413 | 378.634  |         | 328.7946 | 418.7064 |
| 289.078 | 359.3708 | 343.8444 | 287.178 | 385.3616 | 335.5301 | 285.278 | 432.712  | 328.5151 |
|         | 344.1411 | 343.5345 |         | 341.7444 | 347.9518 |         | 422.0195 | 328.8143 |
|         | 343.4758 | 362.1281 |         | 335.479  | 360.8705 |         | 328.7102 | 331.1296 |
|         | 343.4603 | 363.2827 |         | 335.4356 | 379.8335 |         | 328.4788 | 425.2736 |
| 288.978 | 367.6712 | 343.3779 | 287.078 | 387.5728 | 335.1212 | 285.178 | 426.696  | 328.2079 |
|         | 343.7658 | 343.1157 |         | 342.48   | 349.4806 |         | 428.8135 | 328.4288 |
|         | 343.0448 | 363.3954 |         | 335.0799 | 358.8928 |         | 328.4367 | 330.4493 |
|         | 343.0286 | 364.5852 |         | 335.0335 | 380.9206 |         | 328.1732 | 431.6433 |
| 288.878 | 373.2    | 342.9158 | 286.978 | 389.3152 | 334.7188 | 285.078 | 432.52   | 327.9103 |
|         | 343.3975 | 342.7004 |         | 343.4428 | 350.5757 |         | 435.1149 | 328.0769 |
|         | 342.6141 | 364.6556 |         | 334.6849 | 356.846  |         | 328.1794 | 329.8335 |
|         | 342.5971 | 365.8949 |         | 334.6353 | 381.7273 |         | 327.8772 | 437.6061 |
| 288.778 | 375.1036 | 342.458  | 286.878 | 372.9248 | 334.3209 | 284.978 | 443.464  | 327.6233 |
|         | 343.0379 | 342.2907 |         | 344.6801 | 351.0384 |         | 440.7476 | 327.7513 |
|         | 342.1843 | 365.8789 |         | 334.2945 | 354.7627 |         | 327.941  | 329.276  |
|         | 342.1665 | 367.1838 |         | 334.2412 | 382.1315 |         | 327.5916 | 442.9727 |
| 288.678 | 363.8472 | 342.0044 | 286.778 | 366.4344 | 333.9254 | 284.878 | 456.148  | 327.3481 |
|         | 342.6889 | 341.8886 |         | 346.2229 | 350.7453 |         | 445.5541 | 327.4478 |
|         | 341.7558 | 367.0333 |         | 333.9069 | 352.6719 |         | 327.725  | 328.7713 |
|         | 341.737  | 368.4227 |         | 333.8498 | 382.0734 |         | 327.3176 | 447.576  |
| 288.578 | 367.5964 | 341.5535 | 286.678 | 387.3872 | 333.532  | 284.778 | 463.348  | 327.0859 |
|         | 342.3508 | 341.4961 |         | 348.1177 | 349.6815 |         | 449.3516 | 327.1645 |
|         | 341.3273 | 368.0845 |         | 333.5218 | 350.601  |         | 327.5357 | 328.3149 |
|         | 341.3076 | 369.5817 |         | 333.4603 | 381.6128 |         | 327.0564 | 451.2267 |
| 288.478 | 364.6476 | 341.1054 | 286.578 | 378.1352 | 333.1428 | 284.678 | 450.456  | 326.8374 |
|         | 342.0264 | 341.1185 |         | 350.4147 | 347.9437 |         | 452.0487 | 326.8998 |
|         | 340.8994 | 369.0004 |         | 333.1413 | 348.577  |         | 327.3776 | 327.9023 |
|         | 340.8787 | 370.6353 |         | 333.075  | 380.9193 |         | 326.8091 | 453.8296 |
| 288.378 | 360.8384 | 340.6596 | 286.478 | 382.4308 | 332.7569 | 284.578 | 439.664  | 326.6014 |
|         | 341.7181 | 340.7629 |         | 353.147  | 345.7188 |         | 453.5373 | 326.6514 |
|         | 340.4719 | 369.7497 |         | 332.7648 | 346.6201 |         | 327.2545 | 327.5278 |
|         | 340.4501 | 371.5615 |         | 332.6932 | 380.2349 |         | 326.5742 | 455.2755 |
| 288.278 | 374.8256 | 340.2154 | 286.378 | 385.2808 | 332.3752 | 284.478 | 445.48   | 326.3768 |
|         | 341.4284 | 340.4403 |         | 356.3661 | 343.237  |         | 453.751  | 326.4169 |
|         | 340.0444 | 370.3037 |         | 332.3928 | 344.7476 |         | 327.1712 | 327.1861 |
|         | 340.0215 | 372.3461 |         | 332.3152 | 379.8578 |         | 326.3507 | 455.4991 |
| 288.178 | 373.2888 | 339.7743 | 286.278 | 385.6836 | 331.9991 | 284.378 | 455.056  | 326.1643 |
|         | 341.1635 | 340.1704 |         | 360.0974 | 340.7248 |         | 452.7023 | 326.1966 |
|         | 339.6186 | 370.6395 |         | 332.0258 | 342.9729 |         | 327.1358 | 326.8744 |
|         | 339.5944 | 372.9885 |         | 331.9416 | 380.0535 |         | 326.1393 | 454.5161 |
| 288.078 | 382.8848 | 339.336  | 286.178 | 377.7688 | 331.6274 | 284.278 | 455.956  | 325.9651 |
|         | 340.9274 | 339.9789 |         | 364.3614 | 338.3675 |         | 450.3873 | 325.991  |
|         | 339.1943 | 370.7377 |         | 331.664  | 341.305  |         | 327.1584 | 326.591  |
|         | 339.1688 | 373.499  |         | 331.5724 | 381.0357 |         | 325.9411 | 452.3285 |
| 287.978 | 385.4068 | 338.9014 | 286.078 | 383.32   | 331.2594 | 284.178 | 446.108  | 325.7793 |
|         | 340.7276 | 339.9033 |         | 369.1809 | 336.2843 |         | 446.8959 | 325.7999 |
|         | 338.7726 | 370.586  |         | 331.3068 | 339.7489 |         | 327.2499 | 326.3334 |
|         | 338.7457 | 373.908  |         | 331.2069 | 382.9529 |         | 325.7561 | 449.0342 |

|         |          |          |         |          |          |         |          |          |
|---------|----------|----------|---------|----------|----------|---------|----------|----------|
| 284.078 | 457.564  | 325.6058 | 282.178 | 369.562  | 323.991  | 280.278 | 326.1052 | 326.1123 |
|         | 442.3334 | 325.6221 |         | 335.7122 | 323.9863 |         | 327.0308 | 326.1076 |
|         | 327.421  | 326.0986 |         | 346.4578 | 324.0916 |         | 328.3992 | 326.1487 |
|         | 325.5834 | 444.7475 |         | 323.979  | 358.3227 |         | 326.1052 | 329.3778 |
| 283.978 | 439.584  | 325.4459 | 282.078 | 359.5936 | 323.9615 | 280.178 | 339.2964 | 339.3033 |
|         | 436.8128 | 325.4586 |         | 333.8485 | 323.9567 |         | 340.1446 | 339.2987 |
|         | 327.6863 | 325.8862 |         | 346.4412 | 324.056  |         | 341.1602 | 339.3381 |
|         | 325.4242 | 439.5929 |         | 323.9499 | 356.4642 |         | 339.2964 | 342.0593 |
| 283.878 | 430.128  | 325.2976 | 281.978 | 341.3372 | 323.9357 | 280.078 | 348.0808 | 348.0875 |
|         | 430.5171 | 325.3074 |         | 332.2798 | 323.9308 |         | 348.8606 | 348.083  |
|         | 328.058  | 325.6928 |         | 346.0888 | 324.0245 |         | 349.5958 | 348.1208 |
|         | 325.2767 | 433.7659 |         | 323.9244 | 354.5618 |         | 348.0808 | 348.4246 |
| 283.778 | 432.636  | 325.1601 | 281.878 | 336.6192 | 323.9117 | 279.978 | 346.5012 | 346.5078 |
|         | 423.6058 | 325.1675 |         | 330.9693 | 323.9067 |         | 347.2201 | 346.5033 |
|         | 328.5492 | 325.5163 |         | 345.4142 | 323.9954 |         | 347.7357 | 346.5396 |
|         | 325.14   | 427.4388 |         | 323.9008 | 352.5941 |         | 346.5012 | 348.5017 |
| 283.678 | 438.352  | 325.0336 | 281.778 | 344.5448 | 323.8891 | 279.878 | 336.6772 | 336.6836 |
|         | 416.2633 | 325.039  |         | 329.8723 | 323.884  |         | 337.3416 | 336.6792 |
|         | 329.1736 | 325.356  |         | 344.4491 | 323.9679 |         | 337.6872 | 336.714  |
|         | 325.0143 | 420.8083 |         | 323.8785 | 350.5486 |         | 336.6772 | 338.3969 |
| 283.578 | 401.036  | 324.9189 | 281.678 | 351.6612 | 323.8685 | 279.778 | 339.188  | 339.1943 |
|         | 408.6746 | 324.9226 |         | 328.9598 | 323.8635 |         | 339.8036 | 339.19   |
|         | 329.943  | 325.2118 |         | 343.2375 | 323.943  |         | 340.019  | 339.2234 |
|         | 324.9003 | 414.0698 |         | 323.8583 | 348.4393 |         | 339.188  | 340.6783 |
| 283.478 | 402.116  | 324.8121 | 281.578 | 345.6692 | 323.851  | 279.678 | 341.048  | 341.0541 |
|         | 401.0043 | 324.8143 |         | 328.2024 | 323.8459 |         | 341.6196 | 341.0499 |
|         | 330.8616 | 325.079  |         | 341.8321 | 323.9213 |         | 341.7367 | 341.082  |
|         | 324.794  | 407.3952 |         | 323.841  | 346.2888 |         | 341.048  | 342.3503 |
| 283.378 | 393.41   | 324.7133 | 281.478 | 356.8912 | 323.8357 | 279.578 | 353.0716 | 353.0775 |
|         | 393.412  | 324.7141 |         | 327.5718 | 323.8306 |         | 353.6035 | 353.0734 |
|         | 331.9315 | 324.9573 |         | 340.2897 | 323.9022 |         | 353.6469 | 353.1043 |
|         | 324.6957 | 400.9452 |         | 323.826  | 344.1261 |         | 353.0716 | 354.2193 |
| 283.278 | 395.8164 | 324.6214 | 281.378 | 350.1772 | 323.8239 | 279.478 | 336.456  | 336.4618 |
|         | 386.0333 | 324.6213 |         | 327.0505 | 323.8187 |         | 336.9519 | 336.4577 |
|         | 333.1466 | 324.8454 |         | 338.6697 | 323.8868 |         | 336.9407 | 336.4875 |
|         | 324.6045 | 394.85   |         | 323.8144 | 341.9921 |         | 336.456  | 337.4756 |
| 283.178 | 389.292  | 324.5369 | 281.278 | 351.9932 | 323.8148 | 279.378 | 330.6864 | 330.6921 |
|         | 378.9887 | 324.5359 |         | 326.6166 | 323.8097 |         | 331.1496 | 330.688  |
|         | 334.494  | 324.743  |         | 337.0275 | 323.8744 |         | 331.0983 | 330.7167 |
|         | 324.5206 | 389.2163 |         | 323.8056 | 339.9207 |         | 330.6864 | 331.5991 |
| 283.078 | 374.918  | 324.4591 | 281.178 | 328.4184 | 323.8087 | 279.278 | 330.0008 | 330.0064 |
|         | 372.3589 | 324.4574 |         | 326.2556 | 323.8036 |         | 330.4342 | 330.0024 |
|         | 335.9507 | 324.6492 |         | 335.4138 | 323.8652 |         | 330.3538 | 330.03   |
|         | 324.4433 | 384.102  |         | 323.7997 | 337.9481 |         | 330.0008 | 330.8236 |
| 282.978 | 383.458  | 324.3865 | 281.078 | 328.7296 | 323.803  | 279.178 | 338.1032 | 338.1086 |
|         | 366.2171 | 324.3842 |         | 325.9531 | 323.798  |         | 338.5093 | 338.1047 |
|         | 337.483  | 324.5623 |         | 333.8686 | 323.8567 |         | 338.4083 | 338.1314 |
|         | 324.3712 | 379.5481 |         | 323.7943 | 336.1022 |         | 338.1032 | 338.8496 |
| 282.878 | 375.294  | 324.32   | 280.978 | 328.5184 | 323.7979 | 279.078 | 342.0184 | 342.0237 |
|         | 360.6014 | 324.3171 |         | 325.6974 | 323.793  |         | 342.3995 | 342.0198 |
|         | 339.0501 | 324.4829 |         | 332.4248 | 323.8489 |         | 342.2843 | 342.0456 |
|         | 324.3052 | 375.5507 |         | 323.7895 | 334.4043 |         | 342.0184 | 342.6993 |
| 282.778 | 379.75   | 324.2589 | 280.878 | 334.5316 | 323.7933 | 278.978 | 347.2904 | 347.2956 |
|         | 355.5249 | 324.2555 |         | 325.4811 | 323.7884 |         | 347.6487 | 347.2918 |
|         | 340.6016 | 324.4101 |         | 331.1054 | 323.8418 |         | 347.5238 | 347.3166 |
|         | 324.2445 | 372.0729 |         | 323.7851 | 332.8697 |         | 347.2904 | 347.9149 |
| 282.678 | 369.3044 | 324.2034 | 280.778 | 334.098  | 323.7899 |         |          |          |
|         | 351.0062 | 324.1997 |         | 325.2975 | 323.785  |         |          |          |
|         | 342.0814 | 324.3441 |         | 329.9246 | 323.836  |         |          |          |
|         | 324.1895 | 369.0768 |         | 323.7818 | 331.5057 |         |          |          |
| 282.578 | 362.4444 | 324.1527 | 280.678 | 338.9664 | 323.7875 |         |          |          |
|         | 347.0124 | 324.1488 |         | 325.1408 | 323.7826 |         |          |          |
|         | 343.4302 | 324.2838 |         | 328.8878 | 323.8314 |         |          |          |
|         | 324.1392 | 366.4713 |         | 323.7797 | 330.3115 |         |          |          |
| 282.478 | 367.5676 | 324.1058 | 280.578 | 329.3616 | 323.7867 |         |          |          |
|         | 343.5235 | 324.1017 |         | 325.0076 | 323.7819 |         |          |          |
|         | 344.5898 | 324.2283 |         | 327.9937 | 323.8286 |         |          |          |
|         | 324.0928 | 364.1781 |         | 323.7791 | 329.2822 |         |          |          |
| 282.378 | 362.2372 | 324.0635 | 280.478 | 323.324  | 323.7865 |         |          |          |
|         | 340.5077 | 324.0591 |         | 324.8925 | 323.7818 |         |          |          |
|         | 345.5084 | 324.1781 |         | 327.2345 | 323.8264 |         |          |          |
|         | 324.0509 | 362.1132 |         | 323.7791 | 328.4055 |         |          |          |
| 282.278 | 363.0224 | 324.0252 | 280.378 | 321.908  | 323.7863 |         |          |          |
|         | 337.915  | 324.0207 |         | 324.7924 | 323.7816 |         |          |          |
|         | 346.1415 | 324.1325 |         | 326.5989 | 323.8244 |         |          |          |
|         | 324.0129 | 360.1831 |         | 323.7791 | 327.6674 |         |          |          |
